# Supplementary material
Source: PubMed Central journal article supplement (PMC152813)
Supplement: nar_31_7_1869__1.pdf [file nar_31_7_1869__1.pdf]

Table A. Description of array elements on the microarray platform.

Legend

- (1) best representation of a gene fulfilling both criteria - > 97% sequence identity over a 100bp window &
  - (2) best hit by a gene fulfilling both criteria - > 97% sequence identity over a 100bp window & > 90% sec
  - (3) additional hit(s) by gene(s) fulfilling both criteria - > 97% sequence identity over a 100bp window & >
  - (4) hit(s) by gene(s) fulfilling ONE of the two criteria - > 97% sequence identity over a 100bp window OF
  - (5) best representation of a gene by the given spot
- only the top two hits for each spot are detailed over a 100bp window, and over the entire fragment, for e

| SPOTTING | CHIP_ID  | SPOT_SPI   | (5) BEST_1 | (5) BEST_2 | FORWARD | REVERSE | AMPLIFIED | (1) GENE_ |
|----------|----------|------------|------------|------------|---------|---------|-----------|-----------|
| 1        | CTRL001  | none       |            |            |         |         | LT2_gDNA  | 0         |
| 2        | CHIP0785 | STM/STY    | STM1968    | STY2176    | ATGGCAG | TTAAACC | ATGGCAG   | 1         |
| 3        | CHIP0801 | STM/STY    | STM3172    | STY3349    | ATGTCAT | TTACCAG | ATGTCAT   | 1         |
| 4        | CHIP0817 | STM/STY    | STM2021    | STY2224    | ATGACCG | TTACAGG | ATGACCG   | 1         |
| 5        | CHIP2648 | STM/STY    | STM0086    | STY0101    | ATGGATA | TTAGATT | ATGGATA   | 1         |
| 6        | CHIP2672 | STM/STY    | STM0141    | STY0163    | ATGCGTA | TTAGAGG | ATGCGTA   | 1         |
| 7        | CHIP2666 | STM/STY    | STM0128    | STY0148    | ATGAGTG | TTATGTC | ATGAGTG   | 1         |
| 8        | CHIP2682 | STM/STY    | STM0161    | STY0183    | ATGAACA | TTATGCG | ATGAACA   | 1         |
| 9        | CHIP2698 | STM/STY    | STM0183    | STY0208    | ATGACGA | TTACCAG | ATGACGA   | 1         |
| 10       | CHIP2714 | STM/STY    | STM0215    | STY0238    | ATGGCTA | TTATTCC | ATGGCTA   | 1         |
| 11       | CHIP2730 | STM/STY    | STM0247    | STY0274    | ATGATTA | TTAGACA | ATGATTA   | 1         |
| 12       | CHIP2746 | STM/STY    | STM1532    | STY1531    | ATGCAAA | TTATTCA | GTGCAAA   | 1         |
| 13       | CHIP3308 | STM/STY    | STM0685    | STY0723    | ATGAATA | TTATTTG | ATGAATA   | 1         |
| 14       | CHIP3324 | STM/STY    | STM0711    | STY0751    | ATGAAAA | TTATGCC | ATGAAAA   | 1         |
| 15       | CHIP0790 | STM/STY    | STM4456    | STY4796    | ATGCTAA | TTACTGC | ATGCTAA   | 1         |
| 16       | CHIP0806 | STM/STY    | STM2032    | STY2237    | ATGAGCG | TTAGCAT | ATGAGCG   | 1         |
| 17       | CHIP0822 | STM/STY    | STM1998    | STY2206    | ATGGAAT | TTAACTG | ATGGAAT   | 1         |
| 18       | CHIP0846 | STM/STY    | STM1004    | STY1010    | ATGACAC | TTAACTT | ATGACAC   | 1         |
| 19       | CHIP2583 | STM/STY    | STM3842    | STY3938    | ATGGATT | TTAGGAT | ATGGATT   | 1         |
| 20       | CHIP2599 | STM/STY    | STM3867    | STY3911    | ATGCAAC | TTACCAG | ATGCAAC   | 1         |
| 21       | CHIP2631 | STM/STY    | STM0050    | STY0059    | ATGCCTA | TTATTGT | ATGCCTA   | 1         |
| 22       | CHIP2655 | STM/STY    | STM0098    | STY0113    | ATGAAAT | TTAGGGC | ATGAAAT   | 1         |
| 23       | CHIP3247 | STM/STY    | STM3334    | STY3514    | ATGCAGA | TTAACGC | ATGCAGA   | 1         |
| 24       | CHIP3263 | STM/STY    | STM3370    | STY3550    | ATGACGG | TTACATC | ATGACGG   | 1         |
| 25       | CHIP3817 | STM/STY    | STM1098    | STY1130    | ATGCAAG | TTAAACA | ATGCAAG   | 1         |
| 26       | CHIP3833 | STM/STY    | STM1130    | STY1167    | ATGGGGA | TTATTTT | ATGGGGA   | 1         |
| 27       | CHIP3849 | STM/STY    | STM1168    | STY1206    | ATGAAAT | TTACTCT | ATGAAAT   | 1         |
| 28       | CHIP2425 | STM/STY    | STM3510    | STY4286    | ATGCTAA | TTACAAG | ATGCTAA   | 1         |
| 29       | CHIP2441 | STM specil | STM3532    |            | ATGACTC | TTAAAGT | ATGACTC   | 1         |
| 30       | CHIP2457 | STM/STY    | STM3571    | STY4240    | ATGGCAA | TTAATCC | ATGGCAA   | 1         |
| 31       | CHIP3851 | STM specil | STM1188    |            | ATGCGCT | TTAATTA | ATGCGCT   | 1         |
| 32       | CHIP2427 | STM/STY    | STM3515    | STY4281    | ATGTTGA | TTAAACC | ATGTTGA   | 1         |
| 33       | CHIP2443 | STM/STY    | STM3534    | STY4276    | ATGAATG | TTACAAC | ATGAATG   | 1         |
| 34       | CHIP2459 | STM/STY    | STM3573    | STY4238    | ATGATGT | TTATTTT | ATGATGT   | 1         |
| 35       | CHIP3724 | STM/STY    | STM4568    | STY4919    | ATGTTTC | TTATTCA | GTGTTTC   | 1         |
| 36       | CHIP4036 | STM/STY    | STM2723    | STY4628    | ATGAGTG | TTATATT | ATGAGTG   | 1         |
| 37       | CHIP2453 | STM/STY    | STM3556    | STY4255    | ATGTCAT | TTATTGG | ATGTCAT   | 1         |
| 38       | CHIP3718 | STM/STY    | STM4547    | STY4900    | ATGCTGC | TTACGAG | ATGCTGC   | 1         |
| 39       | CHIP3734 | STM/STY    | STM4588    | STY4935    | ATGCAGC | TTAGACG | ATGCAGC   | 1         |
| 40       | CHIP4046 | STM/STY    | STM2738    | STY4644    | ATGAGTT | TTAGAGG | ATGAGTT   | 1         |
| 41       | CHIP4062 | STM specil | STM2755    |            | ATGAAAT | TTAGTGA | ATGAAAT   | 1         |

|    |          |            |         |         |                          |   |
|----|----------|------------|---------|---------|--------------------------|---|
| 42 | CHIP4078 | STM/STY    | STM2776 | STY2893 | ATGTATG TTAATGG ATGTATG  | 1 |
| 43 | CHIP4128 | STM/STY    | STM4103 | STY3766 | ATGTGGC TTAATG GTGTGGC   | 1 |
| 44 | CHIP4152 | STM/STY    | STM2858 | STY2980 | ATGCAAC TTAGCAT,ATGCAAC  | 1 |
| 45 | CHIP4176 | STM/STY    | STM2927 | STY3052 | ATGCGCA TTACCAT ATGCGCA  | 1 |
| 46 | CHIP3432 | STM/STY    | STM0882 | STY0915 | ATGCAGT TTATATT(ATGCAGT  | 1 |
| 47 | CHIP3448 | STM specil | STM0904 |         | ATGCCAG TTATGTT ATGCCAG  | 1 |
| 48 | CHIP3088 | STM/STY    | STM2489 | STY2727 | ATGTTCA TTACAGC,ATGTTCA  | 1 |
| 49 | CHIP3442 | STM specil | STM0898 |         | ATGTTTG TTAGGCG ATGTTTG  | 1 |
| 50 | CHIP3082 | STM/STY    |         |         | ATGAATC TTATTTAC ATGAATC | 0 |
| 51 | CHIP3482 | STM/STY    | STM0954 |         | ATGTTTT TTACGCG ATGTTTT  | 1 |
| 52 | CHIP3498 | STM/STY    | STM0983 | STY0984 | ATGAAGA TTACCCG ATGAAGA  | 1 |
| 53 | CHIP3523 | STM specil | STM1032 |         | ATGGAAG TTA CTGC ATGGAAG | 1 |
| 54 | CHIP4115 | STM/STY    | STM4077 | STY3793 | ATGGCAA TTAGAAA ATGGCAA  | 1 |
| 55 | CHIP4141 | STM/STY    | STM4119 | STY3754 | ATGAACG TTAGCCG ATGAACG  | 1 |
| 56 | CHIP3597 | STM/STY    | STM4310 | STY4511 | ATGCGTT TTAGTCA ATGCGTT  | 1 |
| 57 | CHIP3429 | STM/STY    | STM0877 | STY0910 | ATGATGA TTA CTTA ATGATGA | 1 |
| 58 | CHIP3453 | STM specil | STM0910 |         | ATGACGG TTATAAC ATGACGG  | 1 |
| 59 | CHIP3101 | STM/STY    | STM2523 | STY2768 | ATGCATA TTATTTT ATGCATA  | 1 |
| 60 | CHIP3117 | STM/STY    | STM2552 | STY2799 | ATGTCAC TTA CTGA GTGTCAC | 1 |
| 61 | CHIP3487 | STM/STY    | STM0962 | STY0960 | ATGAGCA TTAGCGG GTGAGCA  | 1 |
| 62 | CHIP3127 | STM/STY    | STM2575 | STY2821 | ATGAATA TTATACG ATGAATA  | 1 |
| 63 | CHIP2960 | STM/STY    | STM1992 | STY2200 | ATGCAGG TTATCGT ATGCAGG  | 1 |
| 64 | CHIP2984 | STM/STY    | STM2270 | STY2495 | ATGAACA TTATTCT ATGAACA  | 1 |
| 65 | CHIP3696 | STM/STY    | STM4514 | STY4870 | ATGGCGC TTATGAT ATGGCGC  | 1 |
| 66 | CHIP2276 | STM/STY    | STM1108 | STY1142 | ATGTGCC TTAGTTG,ATGTGCC  | 1 |
| 67 | CHIP3026 | STM/STY    | STM2346 | STY2576 | ATGGTGG TTATTCC ATGGTGG  | 1 |
| 68 | CHIP0203 | STM/STY    | STM1956 | STY2164 | ATGAATT TTATAAC GTGAATT  | 1 |
| 69 | CHIP0227 | STM specil | STM0195 |         | ATGAATA TTACAGA ATGAATA  | 1 |
| 70 | CHIP2334 | STM/STY    | STM1166 | STY1204 | ATGTCGC TTAGGCG ATGTCGC  | 1 |
| 71 | CHIP2358 | STM/STY    | STM1368 | STY1755 | ATGGTTG TTAAGGT ATGGTTG  | 1 |
| 72 | CHIP3627 | STM/STY    | STM4376 | STY4732 | ATGCTAC TTAACCG ATGCTAC  | 1 |
| 73 | CHIP0269 | STM/STY    | STM2862 | STY2984 | ATGAGTC TTATGAC ATGAGTC  | 1 |
| 74 | CHIP2368 | STM/STY    | STM1451 | STY1671 | ATGAAAC TTAATTC ATGAAAC  | 1 |
| 75 | CHIP2957 | STM/STY    | STM1988 | STY2195 | ATGGTCT TTATCGG ATGGTCT  | 1 |
| 76 | CHIP2973 | STM/STY    | STM2068 | STY2277 | ATGACCA TTACGCG ATGACCA  | 1 |
| 77 | CHIP2997 | STM/STY    |         |         | ATGCTAA TTATGAT ATGCTAA  | 0 |
| 78 | CHIP3013 | STM/STY    | STM2328 | STY2558 | ATGAGTA TTAGCGT ATGAGTA  | 1 |
| 79 | CHIP3663 | STM/STY    | STM4440 | STY4779 | ATGGATA TTAGAGG GTGGATA  | 1 |
| 80 | CHIP3679 | STM specil | STM4488 |         | ATGGCGC TTAAGA ATGGCGC   | 1 |
| 81 | CHIP3695 | STM/STY    | STM4506 | STY4861 | ATGATAA TTAAGC ATGATAA   | 1 |
| 82 | CHIP3039 | STM/STY    | STM2370 | STY2601 | ATGGGAT TTAATGT ATGGGAT  | 1 |
| 83 | CHIP0216 | STM/STY    | STM1257 | STY1863 | ATGCTCT TTAGCAT,ATGCTCT  | 1 |
| 84 | CHIP2315 | STM/STY    | STM1479 | STY1589 | ATGCGAA TTAGTTT ATGCGAA  | 1 |
| 85 | CHIP1333 | STM/STY    | STM0316 | STY0361 | ATGTCTG TTA CTTC GTGTCTG | 1 |
| 86 | CHIP1349 | STM/STY    | STM0164 | STY0186 | ATGAAAG TTA CTCC ATGAAAG | 1 |
| 87 | CHIP1365 | STM/STY    | STM0213 | STY0236 | ATGCAGC TTAATCA ATGCAGC  | 1 |
| 88 | CHIP1389 | STM/STY    | STM0130 | STY0150 | ATGGCTG TTAGTCC ATGGCTG  | 1 |
| 89 | CHIP3906 | STM/STY    | STM1303 | STY1811 | ATGTCTC TTACCCG ATGTCTC  | 1 |
| 90 | CHIP3922 | STM/STY    | STM1338 | STY1772 | ATGAAAT TTAATCC ATGAAAT  | 1 |
| 91 | CHIP3932 | STM specil | STM1354 |         | ATGAAAA TTAGTTC,ATGAAAA  | 1 |
| 92 | CHIP0525 | STM/STY    | STM2146 | STY2375 | ATGCAAC TTACCAC ATGCAAC  | 1 |
| 93 | CHIP3972 | STM/STY    | STM1471 | STY1651 | ATGAAAA TTAGGCA ATGAAAA  | 1 |

|     |          |            |         |          |                            |   |
|-----|----------|------------|---------|----------|----------------------------|---|
| 94  | CHIP0565 | STM/STY    | STM1418 | STY1702  | ATGTTAA( TTACGCT( ATGTTAA( | 1 |
| 95  | CHIP1416 | STM/STY    | STM3863 | STY3915  | ATGTCAT TTAATTAC( ATGTCAT  | 1 |
| 96  | CHIP1344 | STM/STY    | STM0281 | STY0304  | ATGAGCT TTATTTAT( ATGAGCT  | 1 |
| 97  | CHIP1354 | STM/STY    | STM0219 | STY0242  | ATGATTA( TTAGAAC( GTGATTA  | 1 |
| 98  | CHIP1378 | STM/STY    | STM1982 | STY2190  | ATGTCAA( TTAGCGC( ATGTCAA( | 1 |
| 99  | CHIP1490 | STM/STY    | STM2402 | STY2642  | ATGGCTG TTACTCC( ATGGCTG   | 1 |
| 100 | CHIP1506 | STM/STY    | STM2317 | STY2547  | ATGTTAT TTACGGC( ATGTTAT   | 1 |
| 101 | CHIP3927 | STM/STY    | STM1349 | STY1761  | ATGTCCA TTACTTC( ATGTCCA   | 1 |
| 102 | CHIP0536 | STM/STY    | STM2871 | STY2992  | ATGATTC( TTATTCA( ATGATTC( | 1 |
| 103 | CHIP1541 | STM/STY    | STM2443 | STY2680  | ATGCTTG TTAATGA( ATGCTTG   | 1 |
| 104 | CHIP1565 | STM/STY    | STM0503 | STY0549  | ATGAACG TTATGAT( ATGAACG   | 1 |
| 105 | CHIP1042 | STM/STY    | STM4003 | STY3878  | ATGAAAA TTAGTTG( ATGAAAA   | 1 |
| 106 | CHIP1989 | STM/STY    | STM4348 | STY4708  | ATGTTAA( TTAGGTG TTGTTAA(  | 1 |
| 107 | CHIP3153 | STM specil | STM2609 |          | ATGAACG TTATCGT( ATGAACG   | 1 |
| 108 | CHIP3177 | STM/STY    | STM3184 | STY3362  | ATGAAGC TTAATAA( ATGAAGC   | 1 |
| 109 | CHIP2063 | STM/STY    | STM3555 | STY4256  | ATGATAG TTATTTCA( ATGATAG  | 1 |
| 110 | CHIP3227 | STM/STY    | STM3290 | STY3470  | ATGACGA TTATTTG( ATGACGA   | 1 |
| 111 | CHIP1520 | STM/STY    | STM2349 | STY2579  | ATGATTG TTACGCT( ATGATTG   | 1 |
| 112 | CHIP1568 | STM/STY    | STM0512 | STY0560  | ATGGATG TTAGTGT( GTGGATG   | 1 |
| 113 | CHIP1992 | STM/STY    | STM4396 | STY4752  | ATGCCCG TTACTGT( ATGCCCG   | 1 |
| 114 | CHIP2008 | STM/STY    | STM4481 | STY4819  | ATGAGGA TTATAAC( ATGAGGA   | 1 |
| 115 | CHIP1602 | STM/STY    | STM2793 | STY2913  | ATGGGGC TTAACGT( ATGGGGC   | 1 |
| 116 | CHIP2010 | STM/STY    | STM4511 | STY4867  | ATGGATG TTACAGC( ATGGATG   | 1 |
| 117 | CHIP2026 | STM/STY    | STM4594 | STY4943  | ATGAAAC TTAGAAT( ATGAAAC   | 1 |
| 118 | CHIP2042 | STM/STY    | STM3657 | STY4142  | ATGATAA TTACCGC( ATGATAA   | 1 |
| 119 | CHIP3206 | STM/STY    | STM3252 |          | ATGGCAA TTATCTT( GTGGCAA   | 1 |
| 120 | CHIP3222 | STM specil | STM3278 |          | ATGAGTG TTAATAA( ATGAGTG   | 1 |
| 121 | CHIP0618 | STM/STY    | STM4106 | STY3760  | ATGAGCA TTATTGC( ATGAGCA   | 1 |
| 122 | CHIP0730 | STM/STY    | STM1824 | STY1954  | ATGATGA TTAGTTC( ATGATGA   | 1 |
| 123 | CHIP0762 | STM/STY    | STM0548 | STY0595  | ATGATCC TTAATTG( ATGATCC   | 1 |
| 124 | CHIP1821 | STM/STY    | STM4027 | STY3851  | ATGCTAA TTATGGT( ATGCTAA   | 1 |
| 125 | CHIP1853 | STM/STY    | STM0630 | STY0679  | ATGTTAC TTAACGC( GTGTTAC   | 1 |
| 126 | CHIP1885 | STM/STY    | STM3407 | STY4390  | ATGTCAG TTAGGCA( GTGTCAG   | 1 |
| 127 | CHIP0741 | STM/STY    | STM1244 | STY1880a | ATGAAAC TTATGTT( ATGAAAC   | 1 |
| 128 | CHIP1800 | STM/STY    | STM4127 | STY3747  | ATGATGG TTATTCG( GTGATGG   | 1 |
| 129 | CHIP1840 | STM/STY    | STM0690 | STY0728  | ATGAAAC TTAGTTG( ATGAAAC   | 1 |
| 130 | CHIP1872 | STM/STY    | STM0732 | STY0775  | ATGTGGG TTACCAT( ATGTGGG   | 1 |
| 131 | CHIP0590 | STM/STY    | STM0977 | STY0977  | ATGGCTC TTAGCCG( ATGGCTC   | 1 |
| 132 | CHIP0718 | STM/STY    | STM0584 | STY0627  | ATGCTGA TTATCGG( ATGCTGA   | 1 |
| 133 | CHIP1891 | STM/STY    | STM3475 | STY4321  | ATGAGTC TTAACCG( ATGAGTC   | 1 |
| 134 | CHIP0121 | STM/STY    | STM4163 | STY3722  | ATGTATC TTATTCA( ATGTATC   | 1 |
| 135 | CHIP0137 | STM/STY    | STM3564 | STY4248  | ATGAAAC TTACTTC( ATGAAAC   | 1 |
| 136 | CHIP4736 | STM/STY    | STM2778 |          | ATGATAG TTA AAAAG( GGTATAG | 0 |
| 137 | CHIP1220 | STM/STY    | STM1623 | STY1441  | ATGTTGA TTATTCC( ATGTTGA   | 1 |
| 138 | CHIP0409 | STM/STY    | STM1172 | STY1211  | ATGAGCA TTATTTAC( ATGAGCA  | 1 |
| 139 | CHIP1278 | STM/STY    | STM3376 | STY3556  | ATGCAGG TTATTTT( ATGCAGG   | 1 |
| 140 | CHIP1294 | STM/STY    | STM0033 | STY0040  | ATGGTTT TTATTTG( ATGGTTT   | 1 |
| 141 | CHIP4675 | STM/STY    | STM0083 | STY0096  | ATGCTCC TTATTTAC( ATGCTCC  | 1 |
| 142 | CHIP4691 | STM/STY    | STM1250 | STY1873  | ATGTTCC TTATTGC( TTGTTCC   | 1 |
| 143 | CHIP0140 | STM/STY    | STM4021 | STY3857  | ATGAAAT TTATTTCC( ATGAAAT  | 1 |
| 144 | CHIP3354 | STM/STY    | STM3352 | STY0064  | ATGACCA TTACGCC ACCGTTG    | 0 |
| 145 | CHIP0166 | STM/STY    | STM0023 | STY0026  | ATGCGTA TTAATGA( ATGCGTA   | 1 |

|     |          |            |         |         |                          |   |
|-----|----------|------------|---------|---------|--------------------------|---|
| 146 | CHIP0182 | STM/STY    | STM2043 | STY2248 | ATGCGAT TTACTGT(ATGCGAT  | 1 |
| 147 | CHIP1225 | STM/STY    | STM4300 | STY4499 | ATGTCGA TTATTTT(ATGTCGA  | 1 |
| 148 | CHIP1241 | STM/STY    | STM1929 | STY2138 | ATGGTCT TTAGATA(ATGGTCT  | 0 |
| 149 | CHIP0430 | STM/STY    | STM2502 | STY2743 | ATGCCAA TTACGCG ATGCCAA  | 1 |
| 150 | CHIP0454 | STM/STY    | STM4263 | STY4461 | ATGTTTT TTAGGTC ATGTTTT  | 1 |
| 151 | CHIP1283 | STM/STY    | STM2671 | STY2858 | ATGCGTT TTATTCA(ATGCGTT  | 1 |
| 152 | CHIP1299 | STM/STY    | STM0062 | STY0071 | ATGAAGG TTAGTCA(ATGAAGG  | 1 |
| 153 | CHIP1315 | STM/STY    | STM3798 | STY3981 | ATGAAAA TTAACCC(ATGAAAA  | 1 |
| 154 | CHIP0017 | STM/STY    | STM3970 | STY3589 | ATGGTGG TTAGAAT ATGGTGG  | 1 |
| 155 | CHIP0033 | STM/STY    | STM3954 | STY3605 | ATGCCTC TTAATTG ATGCCTC  | 1 |
| 156 | CHIP1656 | STM/STY    | STM2086 | STY2295 | ATGGGTA TTATTGA GGTAAAA  | 1 |
| 157 | CHIP3052 | STM/STY    | STM2393 | STY2625 | ATGAAAT TTAAGCG AAATTAAC | 1 |
| 158 | CHIP1710 | STM/STY    | STM1816 | STY1946 | ATGGCAT TTATTTT(ATGGCAT  | 1 |
| 159 | CHIP1726 | STM/STY    | STM1736 | STY1315 | ATGACAA TTAACCC ATGACAA  | 1 |
| 160 | CHIP1742 | STM/STY    | STM2982 | STY3122 | ATGTCAA TTATTGT ATGTCAA  | 1 |
| 161 | CHIP1758 | STM/STY    | STM2914 | STY3039 | ATGCAGA TTATGAC ATGCAGA  | 1 |
| 162 | CHIP1774 | STM/STY    | STM4097 | STY3773 | ATGAAAA TTAGGGA ATGAAAA  | 1 |
| 163 | CHIP0925 | STM/STY    | STM0578 | STY0620 | ATGGATA TTAACCT ATGGATA  | 1 |
| 164 | CHIP1776 | STM/STY    | STM4091 | STY3779 | ATGTCTG TTATAAG ATGTCTG  | 1 |
| 165 | CHIP0192 | STM/STY    | STM2053 | STY2258 | ATGATGA TTAACCT(ATGAGCA  | 1 |
| 166 | CHIP0030 | STM/STY    | STM3957 | STY3602 | ATGCGGC TTAGAAG ATGCGGC  | 1 |
| 167 | CHIP0054 | STM/STY    | STM3928 | STY3627 | ATGAGTT TTATAGT ATGAGTT  | 1 |
| 168 | CHIP2289 | STM/STY    | STM1263 | STY1858 | ATGCTGA TTAGTAG CTGACAA  | 1 |
| 169 | CHIP1731 | STM/STY    | STM3027 | STY3175 | ATGAAAA TTATGAT(GTGAAAA  | 1 |
| 170 | CHIP1747 | STM/STY    | STM2963 | STY3102 | ATGGCGC TTAGGAA ATGGCGC  | 1 |
| 171 | CHIP0936 | STM/STY    | STM0430 | STY0469 | ATGAAAT TTAGTGG ATGAAAT  | 1 |
| 172 | CHIP0960 | STM/STY    | STM3974 | STY3585 | ATGCCAG TTACGGT TTGCCAG  | 1 |
| 173 | CHIP4408 | STM/STY    | STM0516 | STY0564 | ATGCTCA TTAGGCT ATGCTCA  | 1 |
| 174 | CHIP4440 | STM specil | STM0574 |         | ATGAGTG TTAAGC ATGAGTG   | 1 |
| 175 | CHIP4434 | STM/STY    | STM0564 | STY0612 | ATGACAC TTAACCT ATGACAC  | 1 |
| 176 | CHIP4458 | STM/STY    | STM0600 | STY0644 | ATGAATA TTAGTGC ATGAATA  | 1 |
| 177 | CHIP1214 | STM/STY    | STM1614 | STY1450 | ATGTTTG TTATTCC(ATGTTTG  | 1 |
| 178 | CHIP2762 | STM/STY    | STM1556 | STY1508 | ATGAGTG TTATTCC(ATGAGTG  | 1 |
| 179 | CHIP2786 | STM/STY    | STM1598 | STY1466 | ATGAAAA TTACACA ATGAAAA  | 1 |
| 180 | CHIP2810 | STM/STY    | STM1633 | STY1438 | ATGTTAT(TTATTTT ATGTTAT  | 1 |
| 181 | CHIP2812 | STM/STY    | STM1635 | STY1436 | ATGGCTT TTATCGT ATGGCTT  | 1 |
| 182 | CHIP2932 | STM/STY    | STM1894 | STY2102 | ATGATAG TTAAGGC ATGATAG  | 1 |
| 183 | CHIP4397 | STM/STY    | STM0492 | STY0536 | ATGCATC TTAACCT ATGCATC  | 1 |
| 184 | CHIP1153 | STM/STY    | STM0627 | STY0676 | ATGCTAA TTAGCCG ATGCTAA  | 1 |
| 185 | CHIP1177 | STM/STY    | STM3769 | STY4016 | ATGATGA TTACAGC ATGATGA  | 1 |
| 186 | CHIP4461 | STM/STY    | STM0603 | STY0647 | ATGAGAA TTACAGT ATGAGAA  | 1 |
| 187 | CHIP4455 | STM/STY    | STM0596 | STY0640 | ATGCGTA TTAGAGC ATGCGTA  | 1 |
| 188 | CHIP1211 | STM/STY    | STM2739 | STY4645 | ATGAGCA TTAGCGT ATGAGCA  | 1 |
| 189 | CHIP2863 | STM/STY    | STM1750 | STY1301 | ATGGCAC TTATATG ATGGCAC  | 1 |
| 190 | CHIP2783 | STM/STY    | STM1595 | STY1470 | ATGACAA TTAGGCT ATGACAA  | 1 |
| 191 | CHIP2815 | STM/STY    | STM1641 | STY1428 | ATGACTG TTAGGCC ATGACTG  | 1 |
| 192 | CHIP2831 | STM/STY    | STM1668 | STY1396 | ATGCGTA TTATAGT(GTGCFTA  | 1 |
| 193 | CHIP4665 | STM/STY    | STM4390 | STY4746 | ATGTGGC TTAAGG GTGTGGC   | 1 |
| 194 | CHIP4298 | STM/STY    | STM2660 | STY2849 | ATGCGTC TTAAGG ATGCGTC   | 1 |
| 195 | CHIP4226 | STM/STY    | STM3024 | STY3169 | ATGGGTC TTAAGG ATGGGTC   | 1 |
| 196 | CHIP4338 | STM/STY    | STM0381 | STY0413 | ATGAGAG TTAACGA GTGAGAG  | 1 |
| 197 | CHIP4266 | STM specil | STM3119 |         | ATGAACA TTAATAAC ATGAACA | 1 |

|     |          |            |         |         |                          |   |
|-----|----------|------------|---------|---------|--------------------------|---|
| 198 | CHIP4378 | STM/STY    | STM0459 | STY0502 | ATGTTAG TTATTCA/ATGTTAG  | 1 |
| 199 | CHIP4612 | STM/STY    | STM3096 | STY3249 | ATGAATT TTAGGCGATGAATT   | 1 |
| 200 | CHIP2516 | STM/STY    | STM3692 | STY4104 | ATGAACC TTACGGA ATGAACC  | 1 |
| 201 | CHIP2556 | STM/STY    | STM3807 | STY3971 | ATGAGTG TTAACCC.ATGAGTG  | 1 |
| 202 | CHIP4213 | STM/STY    | STM2993 | STY3131 | ATGACAA TTATCCG ATGACAA  | 1 |
| 203 | CHIP4229 | STM/STY    | STM3028 | STY3176 | ATGAAAA TTATCTG ATGAAAA  | 1 |
| 204 | CHIP4349 | STM/STY    | STM0402 | STY0440 | ATGGTAC TTACAGG ATGGTAC  | 1 |
| 205 | CHIP2479 | STM/STY    | STM3611 | STY4192 | ATGATAA TTACAGG ATGATAA  | 1 |
| 206 | CHIP2495 | STM/STY    | STM3651 | STY4151 | ATGGGAC TTATTGA GTGGGAC  | 1 |
| 207 | CHIP2511 | STM/STY    | STM3682 | STY4114 | ATGATTA TTATTCT ATGATTA  | 1 |
| 208 | CHIP2527 | STM/STY    | STM3729 | STY4065 | ATGGATA TTAATC ATGGATA   | 1 |
| 209 | CHIP2543 | STM/STY    | STM3771 | STY4014 | ATGGCCA TTAGAAT ATGGCCA  | 1 |
| 210 | CHIP4496 | STM/STY    | STM0704 | STY0745 | ATGATCG TTATTTCC ATGATCG | 1 |
| 211 | CHIP1973 | STM/STY    | STM4564 | STY4915 | ATGAGCT TTAGAGC GTGAGCT  | 1 |
| 212 | CHIP1606 | STM/STY    | STM2813 | STY2939 | ATGGATA TTAGCGC ATGGATA  | 1 |
| 213 | CHIP1630 | STM/STY    | STM2130 | STY2343 | ATGAAAG TTATACT ATGAAAG  | 1 |
| 214 | CHIP1646 | STM/STY    | STM2216 | STY2452 | ATGATTG TTACCTC ATGATTG  | 1 |
| 215 | CHIP1662 | STM/STY    | STM2100 | STY2310 | ATGAAAG TTATATC ATGAAAG  | 1 |
| 216 | CHIP1678 | STM/STY    | STM2165 | STY2395 | ATGACGA TTAATTC ATGACGA  | 1 |
| 217 | CHIP1640 | STM/STY    | STM2197 | STY2431 | ATGAGCA TTATAAT ATGAGCA  | 1 |
| 218 | CHIP4540 | STM specil | STM2230 |         | ATGAAGC TTACATC ATGAAGC  | 1 |
| 219 | CHIP1680 | STM/STY    | STM2177 | STY2407 | ATGACCA TTAGACA ATGACCA  | 1 |
| 220 | CHIP1896 | STM/STY    | STM0933 | STY0929 | ATGGCGC TTATTTTT GTGGCGC | 1 |
| 221 | CHIP2104 | STM/STY    | STM3642 | STY4160 | ATGCAGC TTAATCT ATGCAGC  | 1 |
| 222 | CHIP2120 | STM/STY    | STM3547 | STY4264 | ATGAAAT TTAGTGA ATGAAAT  | 1 |
| 223 | CHIP2098 | STM/STY    | STM3669 | STY4129 | ATGATTT TTATAAA ATGATTT  | 1 |
| 224 | CHIP2114 | STM/STY    | STM3580 | STY4231 | ATGCGCA TTAATTA ATGCGCA  | 1 |
| 225 | CHIP2130 | STM/STY    | STM3339 | STY3520 | ATGGCAA TTACGCC ATGGCAA  | 1 |
| 226 | CHIP2154 | STM/STY    | STM3238 | STY3418 | ATGTTTG TTAATGC ATGTTTG  | 1 |
| 227 | CHIP2170 | STM/STY    | STM3141 | STY3312 | ATGCGAA TTAGTTC ATGCGAA  | 1 |
| 228 | CHIP1627 | STM/STY    | STM2852 | STY2974 | ATGAATC TTATGCA GTGAATC  | 1 |
| 229 | CHIP2229 | STM/STY    | STM3203 | STY3382 | ATGCCAA TTAGTTC ATGCCAA  | 1 |
| 230 | CHIP0362 | STM/STY    | STM1401 | STY1719 | ATGGAAG TTACCTC ATGGAAG  | 1 |
| 231 | CHIP0378 | STM/STY    | STM1115 | STY1151 | ATGAAAT TTACCCG ATGAAAT  | 1 |
| 232 | CHIP3353 | STM specil | STM0765 |         | ATGTTGG TTAATAG TTGTTGG  | 1 |
| 233 | CHIP3401 | STM/STY    | STM0835 | STY0876 | ATGGGTC TTATTCT ATGGGTC  | 1 |
| 234 | CHIP0307 | STM/STY    | STM1387 | STY1733 | ATGGCGA TTATGGC ATGGCGA  | 1 |
| 235 | CHIP3356 | STM/STY    | STM0772 | STY0804 | ATGGCTG TTAATTC ATGGCTG  | 1 |
| 236 | CHIP3388 | STM/STY    | STM0816 | STY0851 | ATGAGTA TTAATCC ATGAGTA  | 1 |
| 237 | CHIP3420 | STM/STY    | STM0861 | STY0894 | ATGGCTA TTAACGC ATGGCTA  | 1 |
| 238 | CHIP2201 | STM/STY    | STM3316 | STY3495 | ATGAGTA TTATATC ATGAGTA  | 1 |
| 239 | CHIP0334 | STM/STY    | STM1973 | STY2181 | ATGGCAC TTATTCG ATGGCAC  | 1 |
| 240 | CHIP2241 | STM/STY    | STM3140 | STY3311 | ATGGCAG TTAATTA ATGGCAG  | 1 |
| 241 | CHIP3383 | STM/STY    | STM0809 |         | ATGGTGA TTATTTCC TTGGTGA | 1 |
| 242 | CHIP3415 | STM specil | STM0856 |         | ATGGCTT TTATAAT ATGGCTT  | 1 |
| 243 | CHIP3648 | STM specil | STM4421 |         | ATGGAAA TTAACCG ATGGAAA  | 1 |
| 244 | CHIP3664 | STM/STY    | STM4441 | STY4780 | ATGGAAC TTAGGCG ATGGAAC  | 1 |
| 245 | CHIP4362 | STM/STY    | STM0436 | STY0475 | ATGGCAA TTATCCT GTGGCAA  | 1 |
| 246 | CHIP3649 | STM specil | STM4422 |         | ATGAAAC TTAACCC ATGAAAC  | 1 |
| 247 | CHIP4459 | STM/STY    | STM0601 | STY0645 | ATGTTCC TTAGCAG ATGTTCC  | 1 |
| 248 | CHIP4413 | STM/STY    | STM0521 |         | ATGCGTG TTACCAT ATGCGTG  | 1 |
| 249 | CHIP4430 | STM/STY    | STM0556 | STY0603 | ATGAGCC TTAATCT ATGAGCC  | 1 |

|     |          |              |         |          |                           |   |
|-----|----------|--------------|---------|----------|---------------------------|---|
| 250 | CHIP4446 | STM/STY      | STM0581 | STY0624  | ATGACCA TTAATGC(ATGACCA   | 1 |
| 251 | CHIP4447 | STM/STY      | STM0582 | STY0625  | ATGAAAC TTAATCG(ATGAAAC   | 1 |
| 252 | CHIP1721 | STM/STY      | STM1787 | STY1914  | ATGAGTA TTAGCGT ATGAGTA   | 1 |
| 253 | CHIP4632 | STM specil   | STM0334 |          | ATGACGT TTACGGA ATGACGT   | 1 |
| 254 | CHIP4650 | STM specil   | STM2507 |          | ATGTACT TTAGGCC ATGTACT   | 1 |
| 255 | CHIP4651 | STM/STY      | STM2279 | STY2508  | ATGGGAC TTACATC ATGGGAC   | 1 |
| 256 | CHIP2165 | STM/STY      | STM3151 | STY3323  | ATGGCCG TTAACCT ATGGCCG   | 1 |
| 257 | CHIP1124 | STM/STY      | STM0885 | STY0918  | ATGAAAG TTATTTG ATGAAAG   | 1 |
| 258 | CHIP1148 | STM/STY      | STM0614 | STY0662  | ATGTATA TTAACGC ATGTATA   | 1 |
| 259 | CHIP2547 | STM/STY      | STM3778 | STY4005  | ATGGATG TTATACC GTGGATG   | 1 |
| 260 | CHIP2524 | STM/STY      | STM3708 | STY4087  | ATGAAAG TTAATCC(ATGAAAG   | 1 |
| 261 | CHIP2548 | STM/STY      | STM3779 | STY4004  | ATGATTA(TTATACT(ATGATTA   | 1 |
| 262 | CHIP2557 | STM/STY      | STM3808 | STY3970  | ATGCGTA TTAGCTA ATGCGTA   | 1 |
| 263 | CHIP2559 | STM/STY      | STM3810 | STY3968  | ATGATGA TTAGGGA GTGATGA   | 1 |
| 264 | CHIP2429 | STM specil   | STM3517 |          | ATGGCTG TTAGATC(ATGGCTG   | 1 |
| 265 | CHIP4502 | STM/STY      | STM1120 |          | ATGCAAT TTACGAC ATGCAAT   | 1 |
| 266 | CHIP4602 | STM/STY      | STM4070 | STY3800  | ATGATAC TTATTTG GTGATAC   | 1 |
| 267 | CHIP4658 | STM/STY      | STM4124 |          | ATGAGGT TTACGGA CAGAGGT   | 1 |
| 268 | CHIP4667 | STM/STY      | STM4520 | STY4878  | ATGGTTG TTAATTG(ATGGTTG   | 1 |
| 269 | CHIP4629 | STM/STY      | STM0467 |          | ATGGCTC TTAGGGT GGGGCTC   | 1 |
| 270 | CHIP4638 | STM/STY      | STM1464 | STY1657a | ATGTTCCG TTAGGTG ATGTTCCG | 1 |
| 271 | CHIP3395 | STM/STY      | STM0823 | STY0860  | ATGAAAA TTATTTAT ATGAAAA  | 1 |
| 272 | CHIP3288 | STM/STY      | STM0649 | STY0700  | ATGGCAC TTATTTCC(ATGGCAC  | 1 |
| 273 | CHIP2944 | STM/STY      | STM1934 | STY2142  | ATGAAGC TTAATAA ATGAAGC   | 1 |
| 274 | CHIP3028 | STM/STY      | STM2350 | STY2580  | ATGCAGA TTAGCGA ATGCAGA   | 1 |
| 275 | CHIP0518 | STM specil   | PSLT045 |          | ATGGCAC TTACGCC ATGGCAC   | 1 |
| 276 | CHIP1029 | STM specil   | PSLT049 |          | ATGAAGC TTAGGCC ATGAAGC   | 0 |
| 277 | CHIP0168 | STM specil   | PSLT076 |          | ATGTTAA TTAATCC ATGTTAA   | 1 |
| 278 | CHIP0956 | STM specil   | PSLT030 |          | ATGACAC TTATGTT ATGACAC   | 1 |
| 279 | CHIP4620 | STM specil   | PSLT047 |          | ATGCCGC TTAATCC(ATGCCGC   | 1 |
| 280 | CHIP1075 | STM specil   | PSLT060 |          | ATGAAC TTAGTCT ATGAAC     | 1 |
| 281 | CHIP1054 | STM specil   | PSLT020 |          | ATGATGG TTATCTT CAGGGAC   | 0 |
| 282 | CHIP0500 | none         | R460023 |          | ATGCTTG TTAGATT ATGCTTG   | 0 |
| 283 | CHIP4777 | STM specific |         |          | CCCGGTT ACTTTCT(CCCGGTT   | 0 |
| 284 | CHIP4781 | STM/STY      | STM2293 | STY2523  | CACGGAC CCAGCGC CACGGAC   | 1 |
| 285 | CHIP4785 | STM/STY      |         |          | AGGAGAC TTCGCCA AGGAGAC   | 0 |
| 286 | CHIP4789 | STM/STY      |         |          | TGGGTAT CATCTGC TGGGTAT   | 0 |
| 287 | CHIP4793 | STM/STY      |         |          | CAGCAGT TATCCCG CAGCAGT   | 0 |
| 288 | CHIP4797 | STM/STY      |         |          | CAGCAGA GCATCCA CAGCAGA   | 0 |
| 289 | CHIP4909 | STM/STY      |         |          | ATGATTA TTATTTT(TTGATTA   | 0 |
| 290 | CHIP4925 | STY specific |         | STY0307  | ATGAAAC TTAGCGT ATGAAAC   | 0 |
| 291 | CHIP4941 | STY specific |         | STY0349  | ATGACTG TTACTCT(ATGACTG   | 0 |
| 292 | CHIP4957 | STY specific |         | STY1017  | ATGAGCA TTATGCT ATGAGCA   | 0 |
| 293 | CHIP4973 | STY specific |         | STY1044  | ATGTTTA(TTACTTC/ATGTTTA   | 0 |
| 294 | CHIP4988 | STY specific |         | STY1060  | ATGGAAT TTAGCCC ATGGAAT   | 0 |
| 295 | CHIP4935 | STM/STY      |         |          | ATGGCTC TTAATCC(ATGGCTC   | 0 |
| 296 | CHIP4951 | STM/STY      |         | STY0793  | ATGTCAA TTACAGT GTGTCAA   | 0 |
| 297 | CHIP4967 | STM/STY      |         |          | ATGAGAA TTAATAT(ATGAGAA   | 0 |
| 298 | CHIP5077 | STY specific |         | STY2006  | ATGTCCA TTACCGG ATGTCCA   | 0 |
| 299 | CHIP5090 | STY specific |         | STY2029  | ATGCCGC TTAGCGA ATGCCGC   | 0 |
| 300 | CHIP5199 | STY specific |         | STY3191  | ATGCTGT TTAGAGT ATGCTGT   | 0 |
| 301 | CHIP4945 | STM/STY      |         | STY0477  | ATGGATT TTAATTT(ATGGATT   | 0 |

|     |          |                    |         |                           |   |
|-----|----------|--------------------|---------|---------------------------|---|
| 302 | CHIP4961 | STY specific       | STY1026 | ATGGAAT TTAGTCC ATGGAAT   | 0 |
| 303 | CHIP4977 | STY specific       | STY1048 | ATGGCAC TTATTTG/ATGGCAC   | 0 |
| 304 | CHIP4992 | STY specific       | STY1064 | ATGTCAC TTATCCT/ATGTCAC   | 0 |
| 305 | CHIP5193 | STY specific       | STY3089 | ATGAAAA TTATTGG GTGAAAA   | 0 |
| 306 | CHIP5207 | STY specific       | STY3288 | ATGATTG TTAATGA GTGATTG   | 0 |
| 307 | CHIP4963 | STY specific       | STY1028 | ATGCGAA TTATGCC ATGCGAA   | 0 |
| 308 | CHIP4979 | STY specific       | STY1050 | ATGAAAT TTACCCT ATGAAAT   | 0 |
| 309 | CHIP4994 | STY specific       | STY1066 | ATGAGTT TTAGAGT ATGAGTT   | 0 |
| 310 | CHIP5102 | STY specific       | STY2042 | ATGAGAA TTAGTCC TTGAGAA   | 0 |
| 311 | CHIP5117 | STY specific       | STY2058 | ATGAATA TTAATTA ATGAATA   | 0 |
| 312 | CHIP5223 | STY specific       | STY3659 | ATGCTAG TTAGACG ATGCTAG   | 0 |
| 313 | CHIP5424 | STY specific       | STY4838 | ATGAAGA TTATTTG ATGAAGA   | 0 |
| 314 | CHIP5365 | STM/STY            |         | ATGAATG TTATACC ATGAATG   | 0 |
| 315 | CHIP5298 | STY specific       | STY4522 | ATGAGCC TTAGCCA ATGAGCC   | 0 |
| 316 | CHIP5395 | STY specific       | STY4669 | ATGGAAC TTA AAAAG ATGGAAC | 0 |
| 317 | CHIP5410 | STY specific       | STY4822 | ATGATTG TTAATCT ATGATTG   | 0 |
| 318 | CHIP5425 | STY specific       | STY4842 | ATGGGTG TTA AAGC ATGGGTG  | 0 |
| 319 | CHIP5331 | STY specific       | STY4570 | ATGCAAA TTAGTCA ATGCAAA   | 0 |
| 320 | CHIP5347 | STY specific       | STY4587 | ATGGGAA TTAATCG GTGGGAA   | 0 |
| 321 | CHIP5362 | STY specific       | STY4609 | ATGACAA TTAGGGA GTGACAA   | 0 |
| 322 | CHIP5381 | STY specific       | STY4649 | ATGGATA TTAATTT ATGGATA   | 0 |
| 323 | CHIP5392 | STY specific       | STY4666 | ATGGAAA TTATCTA ATGGAAA   | 0 |
| 324 | CHIP5332 | STY specific       | STY4571 | ATGACTG TTACAGT TTGACTG   | 0 |
| 325 | CHIP2560 | STM/STY STM3811    | STY3967 | ATGCAGT TTATCGC GTGCAGT   | 1 |
| 326 | CHIP2576 | STM/STY STM3831    | STY3947 | ATGGCTA TTATCGG ATGGCTA   | 1 |
| 327 | CHIP2592 | STM/STY STM3854    | STY3929 | ATGAGTA TTAACCG ATGAGTA   | 1 |
| 328 | CHIP0825 | STM/STY STM3790    | STY3992 | ATGATCA TTACCAA ATGATCA   | 1 |
| 329 | CHIP3232 | STM/STY STM3302    | STY3481 | ATGGTGA TTATTCG ATGGTGA   | 1 |
| 330 | CHIP3248 | STM/STY STM3337    | STY3518 | ATGTCGT TTATGAC ATGTCGT   | 1 |
| 331 | CHIP3242 | STM/STY STM3318    | STY3497 | ATGAAAT TTAGTTA ATGAAAT   | 1 |
| 332 | CHIP3258 | STM/STY STM3356    | STY3536 | ATGTTTG TTACGGA ATGTTTG   | 1 |
| 333 | CHIP3274 | STM specil STM3389 |         | ATGGCGA TTAGGCT ATGGCGA   | 1 |
| 334 | CHIP3290 | STM/STY STM0651    | STY0702 | ATGAAAA TTAACCG ATGAAAA   | 1 |
| 335 | CHIP3306 | STM/STY STM0683    | STY0721 | ATGTATG TTA CTTA ATGTATG  | 1 |
| 336 | CHIP3322 | STM/STY STM0705    |         | ATGAGTC TTACGCC ATGAGTC   | 1 |
| 337 | CHIP2740 | STM/STY STM1517    | STY1543 | ATGATGT TTATCCG ATGATGT   | 1 |
| 338 | CHIP0774 | STM specil STM3638 |         | ATGACAT TTACCGG ATGACAT   | 1 |
| 339 | CHIP2581 | STM/STY STM3840    | STY3939 | ATGGTTA TTAGGAC GTGGTTA   | 1 |
| 340 | CHIP2597 | STM/STY STM3859    |         | ATGACAA TTACAGG ATGACAA   | 1 |
| 341 | CHIP2613 | STM/STY STM0011    | STY0011 | ATGCGAT TTAATCG ATGCGAT   | 1 |
| 342 | CHIP0854 | STM/STY STM1246    | STY1878 | ATGAAAA TTAGAAA ATGAAAA   | 1 |
| 343 | CHIP0800 | STM/STY STM2640    | STY2833 | ATGAGCG TTAACGC ATGAGCG   | 1 |
| 344 | CHIP2607 | STM/STY STM3885    | STY3892 | ATGAAAA TTACCCC ATGAAAA   | 1 |
| 345 | CHIP2639 | STM/STY STM0068    | STY0078 | ATGCTTA TTAGCGA GTGCTTA   | 1 |
| 346 | CHIP2663 | STM/STY STM0122    | STY0142 | ATGAAAG TTACGAT ATGAAAG   | 1 |
| 347 | CHIP2679 | STM/STY STM0157    | STY0180 | ATGACGT TTAACGG ATGACGT   | 1 |
| 348 | CHIP3271 | STM/STY STM3386    | STY3566 | ATGAAAG TTA CTTC ATGAAAG  | 1 |
| 349 | CHIP2377 | STM/STY STM1491    | STY1573 | ATGATAA TTAGCTG ATGATAA   | 1 |
| 350 | CHIP2393 | STM/STY STM3449    | STY4349 | ATGCTGC TTACCAG ATGCTGC   | 1 |
| 351 | CHIP3857 | STM/STY STM1201    | STY1240 | ATGAAAT TTA AAGA ATGAAAT  | 1 |
| 352 | CHIP3873 | STM/STY STM1229    | STY1269 | ATGGAAT TTATCCT ATGGAAT   | 1 |
| 353 | CHIP3889 | STM/STY STM1274    | STY1846 | ATGGGCA TTAGCTT ATGGGCA   | 1 |

|     |          |              |         |         |                          |   |
|-----|----------|--------------|---------|---------|--------------------------|---|
| 354 | CHIP4002 | STM/STY      | STM2102 | STY2314 | ATGAGTT TTATCCG,ATGAGTT  | 1 |
| 355 | CHIP2411 | STM/STY      | STM3488 | STY4308 | ATGAAGC TTATTCT(ATGAAGC  | 1 |
| 356 | CHIP3875 | STM/STY      | STM1235 | STY1275 | ATGTTCA,TTACTTG,ATGTTCA  | 1 |
| 357 | CHIP3891 | STM/STY      | STM1276 | STY1842 | ATGTTTC,TTACGAG,ATGTTTC, | 1 |
| 358 | CHIP4004 | STM/STY      | STM2105 | STY2317 | ATGATAA TTAGACC,ATGATAA  | 1 |
| 359 | CHIP4020 | STM/STY      | STM2134 | STY2347 | ATGTTCT(TTAAATC(ATGTTCT) | 1 |
| 360 | CHIP4052 | STM specil   | STM2745 |         | ATGAAAC TTAGATA(ATGAAAC  | 1 |
| 361 | CHIP3901 | STM/STY      | STM1290 | STY1825 | ATGACTA TTATTTG(ATGACTA  | 1 |
| 362 | CHIP4014 | STM/STY      | STM2123 | STY2336 | ATGAGTA TTAATGG,ATGAGTA  | 1 |
| 363 | CHIP3742 | STM/STY      | STM0008 | STY0008 | ATGGATA TTAGTCC,ATGGATA  | 1 |
| 364 | CHIP3758 | STM/STY      | STM0287 | STY0316 | ATGTCTG TTACAGC,ATGTCTG  | 1 |
| 365 | CHIP3774 | STM/STY      | STM0314 | STY0359 | ATGGGCA TTACCCG,ATGGGCA  | 1 |
| 366 | CHIP3790 | STM specil   | STM1047 |         | ATGGCAA TTAGTGC,ATGGCAA  | 0 |
| 367 | CHIP4136 | STM specil   | STM4114 |         | ATGACCC TTACAAC,ATGACCC  | 1 |
| 368 | CHIP3584 | STM/STY      | STM4281 | STY4479 | ATGCATA,TTATTGT,TTGCATA, | 1 |
| 369 | CHIP4184 | STM specil   | STM2939 |         | ATGTATC TTACGCG,GTGTATC  | 1 |
| 370 | CHIP3056 | STM/STY      | STM2404 | STY2645 | ATGTTCC,TTAGGGT,ATGTTCC, | 1 |
| 371 | CHIP3072 | STM/STY      | STM2448 | STY2685 | ATGAAGA TTATTCT,ATGAAGA  | 1 |
| 372 | CHIP3472 | STM specil   | STM0929 |         | ATGGGTA TTAGCGT,ATGGGTA  | 1 |
| 373 | CHIP3450 | STM specil   | STM0906 |         | ATGAAAA TTAAACC,ATGAAAA  | 1 |
| 374 | CHIP3466 | STM specific |         |         | ATGGCAA TTATCGA,ATGGCAA  | 0 |
| 375 | CHIP3106 | STM/STY      | STM2530 | STY2775 | ATGGGTT TTATGCT,ATGGGTT  | 1 |
| 376 | CHIP3122 | STM/STY      | STM2563 | STY2810 | ATGGGCA TTATGGC,GTGGGCA, | 1 |
| 377 | CHIP4099 | STM/STY      | STM4030 | STY3848 | ATGAGAA TTAGTCC,ATGAGAA  | 1 |
| 378 | CHIP3547 | STM specil   | STM4205 |         | ATGAAAA TTATTCC,ATGAAAA  | 1 |
| 379 | CHIP4149 | STM/STY      | STM2854 | STY2976 | ATGCACG TTAATCT,ATGCACG  | 1 |
| 380 | CHIP4181 | STM/STY      | STM2935 | STY3060 | ATGGATC TTAGAAA,ATGGATC  | 1 |
| 381 | CHIP3437 | STM specil   | STM0893 |         | ATGACGC TTAAATA,ATGACGC  | 1 |
| 382 | CHIP3077 | STM/STY      | STM2473 | STY2710 | ATGAACC TTATAGT,ATGAACC  | 1 |
| 383 | CHIP3485 | STM/STY      | STM0958 | STY0956 | ATGGGCA TTATTTG(ATGGGCA  | 1 |
| 384 | CHIP3501 | STM/STY      | STM0988 | STY0990 | ATGAGTT TTAACGC,ATGAGTT  | 1 |
| 385 | CHIP3495 | STM/STY      | STM0975 | STY0975 | ATGACGC TTATTTT(ATGACGC  | 1 |
| 386 | CHIP3135 | STM specil   | STM2591 |         | ATGGCGC TTACCTG,ATGGCGC  | 0 |
| 387 | CHIP3640 | STM/STY      | STM4406 | STY4764 | ATGAAAA TTACGCC,ATGAAAA  | 1 |
| 388 | CHIP2992 | STM/STY      | STM2283 | STY2512 | ATGTTGA TTAGCCT,ATGTTGA, | 1 |
| 389 | CHIP3024 | STM/STY      | STM2343 | STY2573 | ATGAAAA TTATTGT,ATGAAAA  | 1 |
| 390 | CHIP0201 | STM/STY      | STM1923 | STY2132 | ATGCTTA TTATGCT,GTGCTTA  | 1 |
| 391 | CHIP3034 | STM/STY      | STM2364 | STY2595 | ATGGCGA TTAGTTC,GTGGCGA, | 1 |
| 392 | CHIP2286 | STM/STY      | STM1219 | STY1259 | ATGGCGT TTAGTGG,ATGGCGT  | 1 |
| 393 | CHIP2310 | STM/STY      | STM1426 | STY1696 | ATGTTTA(TTAGCCA,ATGTTTA) | 1 |
| 394 | CHIP2342 | STM/STY      | STM1237 | STY1277 | ATGTTTT(TTATCTG,ATGTTTT) | 1 |
| 395 | CHIP0283 | STM/STY      | STM0025 | STY0030 | ATGAACA TTATTCA,ATGAACA  | 1 |
| 396 | CHIP2955 | STM/STY      | STM1986 | STY2193 | ATGCTCT TTAGGAG,ATGCTCT  | 1 |
| 397 | CHIP2352 | STM/STY      | STM1325 | STY1786 | ATGGCCA TTATTGT(ATGGCCA  | 1 |
| 398 | CHIP3621 | STM/STY      | STM4368 | STY4725 | ATGTCAC TTAGTCT(ATGTCAC  | 1 |
| 399 | CHIP3637 | STM/STY      | STM4401 | STY4759 | ATGATTG TTACAGT,ATGATTG  | 1 |
| 400 | CHIP3653 | STM specil   | STM4426 |         | ATGAAAG TTAGATC,ATGAAAG  | 1 |
| 401 | CHIP3677 | STM specil   | STM4485 |         | ATGGCCC TTAGGAA,ATGGCCC  | 1 |
| 402 | CHIP3693 | STM/STY      | STM4502 | STY4858 | ATGAAAG TTATCGA,ATGAAAG  | 1 |
| 403 | CHIP2991 | STM/STY      | STM2281 | STY2510 | ATGACAC TTATAGC,ATGACAC  | 1 |
| 404 | CHIP3007 | STM specil   | STM2315 |         | ATGCTTA TTAGTGA,ATGCTTA  | 1 |
| 405 | CHIP3023 | STM/STY      | STM2342 | STY2572 | ATGTTTA TTATTCT,ATGTTTA  | 1 |



|     |          |              |         |         |                          |   |
|-----|----------|--------------|---------|---------|--------------------------|---|
| 406 | CHIP0200 | STM/STY      | STM1924 | STY2133 | ATGAGTG TTAACA(ATGAGTG   | 1 |
| 407 | CHIP0224 | STM/STY      | STM2701 | STY4607 | ATGGCTC TTATGCA(ATGGCTC  | 1 |
| 408 | CHIP0240 | STM/STY      | STM2467 | STY2703 | ATGAACG TTATGGC ATGAACG  | 1 |
| 409 | CHIP1429 | STM/STY      | STM2654 | STY2847 | ATGGCAG TTAAGG ATGGCAG   | 1 |
| 410 | CHIP1445 | STM/STY      | STM0361 | STY0393 | ATGACCA TTAGTGA ATGACCA  | 1 |
| 411 | CHIP1373 | STM/STY      | STM2017 | STY2220 | ATGAGTA TTATAAC ATGAGTA  | 1 |
| 412 | CHIP1485 | STM/STY      | STM4220 | STY4416 | ATGACAG TTATTCA ATGACAG  | 1 |
| 413 | CHIP0483 | STM/STY      | STM2818 | STY2944 | ATGATCC TTAGGCG TTGATCC  | 1 |
| 414 | CHIP3930 | STM specil   | STM1352 |         | ATGTCGG TTATAAT(ATGTCGG  | 1 |
| 415 | CHIP0509 | STM/STY      | STM1979 | STY2187 | ATGCGCC TTAAC TG ATGCGCC | 1 |
| 416 | CHIP0533 | STM/STY      | STM2874 | STY2995 | ATGAAA TTAAGT(ATGAAA     | 1 |
| 417 | CHIP0549 | STM/STY      | STM1913 | STY2122 | ATGGCTA TTATTTTC ATGGCTA | 1 |
| 418 | CHIP3996 | STM/STY      | STM2093 | STY2303 | ATGTCTC TTATAAA GTGTCTC  | 1 |
| 419 | CHIP1424 | STM/STY      | STM3881 | STY3897 | ATGAAGA TTAGAAA ATGAAGA  | 1 |
| 420 | CHIP1352 | STM/STY      | STM0217 | STY0240 | ATGGCCC TTAGGAC ATGGCCC  | 1 |
| 421 | CHIP1450 | STM/STY      | STM0384 | STY0417 | ATGAAA TTACGCC ATGAAA    | 1 |
| 422 | CHIP1474 | STM/STY      | STM4193 | STY4410 | ATGCTGA TTAACGT(ATGCTGA  | 1 |
| 423 | CHIP1402 | STM/STY      | STM0074 | STY0084 | ATGAAA TTAAC TG ATGAAA   | 1 |
| 424 | CHIP3911 | STM/STY      | STM1309 | STY1804 | ATGGTAC TTATGAC GTGGTAC  | 1 |
| 425 | CHIP3935 | STM specil   | STM1357 |         | ATGCTCT TTAATGT(GTGCTCT  | 1 |
| 426 | CHIP3967 | STM/STY      | STM1463 | STY1658 | ATGATTG TTACGCC ATGATTG  | 1 |
| 427 | CHIP1002 | STM/STY      | STM1017 | STY1025 | ATGAGCA TTATTCC ATGAGCA  | 0 |
| 428 | CHIP1026 | STM/STY      | STM4473 | STY4812 | ATGAATA TTAGAGA ATGAATA  | 1 |
| 429 | CHIP1589 | STM/STY      | STM0542 | STY0588 | ATGGCAG TTATTTTC ATGGCAG | 1 |
| 430 | CHIP3137 | STM specil   | STM2593 |         | ATGAAA TTAGATA ATGAAA    | 1 |
| 431 | CHIP2021 | STM/STY      | STM4565 | STY4916 | ATGAACA TTACAAA ATGAACA  | 1 |
| 432 | CHIP2037 | STM/STY      | STM3701 | STY4094 | ATGTCAG TTAGGCA ATGTCAG  | 1 |
| 433 | CHIP2071 | STM/STY      | STM3509 | STY4287 | ATGAATG TTACAGC ATGAATG  | 1 |
| 434 | CHIP0965 | STM specil   | STM4157 |         | ATGATCC TTAAC TG ATGATCC | 1 |
| 435 | CHIP0981 | STM/STY      | STM1774 | STY1899 | ATGACAA TTACCCC ATGACAA  | 1 |
| 436 | CHIP1584 | STM/STY      | STM0513 | STY0561 | ATGCAAG TTATTGC(ATGCAAG  | 1 |
| 437 | CHIP3140 | STM specil   | STM2596 |         | ATGTTTC TTAGGAC ATGTTTC  | 1 |
| 438 | CHIP3156 | STM specil   | STM1028 |         | ATGATGA TTATGAC ATGATGA  | 0 |
| 439 | CHIP1994 | STM/STY      | STM4400 | STY4758 | ATGATTA TTAGCGT ATGATTA  | 1 |
| 440 | CHIP3158 | STM specific |         |         | ATGCCAG TTAATTAC ATGCCAG | 0 |
| 441 | CHIP3174 | STM/STY      | STM2655 | STY2848 | ATGGCTA TTATCCC ATGGCTA  | 1 |
| 442 | CHIP3190 | STM/STY      | STM3206 | STY3385 | ATGATGG TTATTTTC ATGATGG | 1 |
| 443 | CHIP2066 | STM/STY      | STM3535 | STY4275 | ATGCAGG TTATTTTC ATGCAGG | 1 |
| 444 | CHIP2082 | STM/STY      | STM3738 | STY4056 | ATGCTGT TTAGTGC ATGCTGT  | 1 |
| 445 | CHIP0714 | STM/STY      | STM2548 | STY2794 | ATGGCTA TTATGCC ATGGCTA  | 1 |
| 446 | CHIP0642 | STM/STY      | STM1203 | STY1242 | ATGTTTA TTAGTGG ATGTTTA  | 1 |
| 447 | CHIP1797 | STM/STY      | STM4001 | STY3880 | ATGACTA TTATTCC ATGACTA  | 1 |
| 448 | CHIP1829 | STM/STY      | STM0831 | STY0870 | ATGAGTA TTATTCC ATGAGTA  | 1 |
| 449 | CHIP1861 | STM/STY      | STM0802 | STY0836 | ATGACTC TTAACCG ATGACTC  | 1 |
| 450 | CHIP0579 | STM/STY      | STM1421 | STY1699 | ATGGCAC TTATACA ATGGCAC  | 1 |
| 451 | CHIP0757 | STM/STY      | STM2454 | STY2691 | ATGAAA TTAAGCC ATGAAA    | 1 |
| 452 | CHIP1808 | STM/STY      | STM4074 | STY3796 | ATGCAA TTAACAT(ATGCAA    | 1 |
| 453 | CHIP1848 | STM/STY      | STM0642 | STY0693 | ATGCAGG TTAAC TG ATGCAGG | 1 |
| 454 | CHIP1880 | STM/STY      | STM0267 | STY0288 | ATGACCG TTAGTGG ATGACCG  | 1 |
| 455 | CHIP0694 | STM/STY      | STM2073 | STY2282 | ATGAGCA TTATACT(ATGAGCA  | 1 |
| 456 | CHIP0630 | STM/STY      | STM1696 | STY1355 | ATGGTGG TTAGCGA ATGGTGG  | 1 |
| 457 | CHIP0097 | STM/STY      | STM0385 | STY0418 | ATGTTCC TTATGCC ATGTTCC  | 1 |

|     |          |            |         |         |                         |   |
|-----|----------|------------|---------|---------|-------------------------|---|
| 458 | CHIP4704 | STM/STY    | STM1810 | STY1940 | ATGTCTG TTATCTA(ATGTCTG | 1 |
| 459 | CHIP4720 | STM/STY    | STM2132 |         | ATGACAG TTAATC(ATGACAG  | 1 |
| 460 | CHIP0161 | STM/STY    | STM0669 | STY0715 | ATGTTCA(TTATTTCTGTGTTCA | 1 |
| 461 | CHIP1228 | STM/STY    | STM4289 | STY4488 | ATGTCAT TTAGTTC(ATGTCAT | 1 |
| 462 | CHIP1244 | STM/STY    | STM1908 | STY2116 | ATGGCGA TTAATGG(ATGGCGA | 1 |
| 463 | CHIP0451 | STM/STY    | STM4261 | STY4459 | ATGCAGG TTATGCG(ATGCAGG | 1 |
| 464 | CHIP0467 | STM/STY    | STM3717 | STY4078 | ATGGATT(TTATTTGTATGGATT | 1 |
| 465 | CHIP0100 | STM/STY    | STM1855 | STY1987 | ATGACTA TTAGGAG GTGACTA | 1 |
| 466 | CHIP0124 | STM/STY    | STM4167 | STY3718 | ATGACCG TTAGTTG(ATGACCG | 1 |
| 467 | CHIP0156 | STM/STY    | STM3866 | STY3912 | ATGGCCG TTAACCC(ATGGCCG | 1 |
| 468 | CHIP0172 | STM/STY    | STM2267 | STY2493 | ATGAAAG TTAGAAC(ATGAAAG | 1 |
| 469 | CHIP3385 | STM/STY    | STM0812 | STY0847 | ATGATGA TTAGGGC(ATGAAAT | 1 |
| 470 | CHIP4356 | STM/STY    | STM0415 | STY0453 | ATGTGCA TTATTAG TGCATTG | 1 |
| 471 | CHIP0398 | STM/STY    | STM4055 | STY3816 | ATGAGTT(TTATTTTATGAGTT  | 1 |
| 472 | CHIP0414 | STM/STY    | STM2063 | STY2269 | ATGAATA(TTAGACG ATGAATA | 1 |
| 473 | CHIP1265 | STM/STY    | STM1690 | STY1371 | ATGGGTA TTATTGA(ATGGGTA | 1 |
| 474 | CHIP1289 | STM/STY    | STM2681 | STY2868 | ATGAGTA TTACTTC(ATGAGTA | 1 |
| 475 | CHIP0456 | STM/STY    | STM3423 | STY4375 | ATGGCTC TTATTTCTATGGCTC | 1 |
| 476 | CHIP0472 | STM/STY    | STM3723 | STY4071 | ATGCGTT TTATAGC(ATGCGTT | 1 |
| 477 | CHIP0001 | STM/STY    | STM3987 | STY3573 | ATGAAAA TTATTTCTGTAAAA  | 1 |
| 478 | CHIP0461 | STM/STY    | STM2583 | STY2829 | ATGAAGA TTATTTATATGAAGA | 1 |
| 479 | CHIP0041 | STM/STY    | STM3946 | STY3613 | ATGAAAA TTAGTAA(ATGAAAA | 1 |
| 480 | CHIP0065 | STM/STY    | STM3917 | STY3638 | ATGAATC TTATGAG(ATGAATC | 1 |
| 481 | CHIP0867 | STM/STY    | STM1977 | STY2185 | ATGAGTG TTAACGA(ATGAGTG | 1 |
| 482 | CHIP0883 | STM/STY    | STM1802 | STY1930 | ATGACCC TTACGTT(ATGACCC | 1 |
| 483 | CHIP0899 | STM/STY    | STM2384 | STY2616 | ATGGCAG TTACCAG(ATGGCAG | 1 |
| 484 | CHIP0915 | STM/STY    | STM2324 | STY2554 | ATGAAAA TTAATG(ATGAAAA  | 1 |
| 485 | CHIP0931 | STM/STY    | STM3733 | STY4061 | ATGAAAC TTACACG(ATGAAAC | 1 |
| 486 | CHIP0947 | STM/STY    | STM2700 | STY4606 | ATGGCTT TTAGAGG(ATGGCTT | 1 |
| 487 | CHIP1760 | STM/STY    | STM2890 | STY3013 | ATGGGGA TTATGTT(ATGGGGA | 1 |
| 488 | CHIP1784 | STM/STY    | STM4046 | STY3827 | ATGACCA TTAGCTA(ATGACCA | 1 |
| 489 | CHIP0014 | STM/STY    | STM3973 | STY3586 | ATGGGTC TTATACC(ATGGGTC | 1 |
| 490 | CHIP0852 | STM/STY    | STM3174 | STY3351 | ATGGCAG TTAAGT(GCAGAGC  | 1 |
| 491 | CHIP1518 | STM/STY    | STM2409 | STY2650 | ATGTCCT TTAGGAC TCCTTCA | 1 |
| 492 | CHIP0078 | STM/STY    | STM3901 | STY3656 | ATGAACG TTATGAT(ATGAACG | 1 |
| 493 | CHIP0904 | STM/STY    | STM0101 | STY0118 | ATGTTAG TTACCGA(ATGTTAG | 1 |
| 494 | CHIP1755 | STM/STY    | STM2933 | STY3058 | ATGCGCT TTAGGAT(ATGCGCT | 1 |
| 495 | CHIP1771 | STM/STY    | STM2921 | STY3046 | ATGAGAT TTATCCA(ATGAGAT | 1 |
| 496 | CHIP1795 | STM/STY    | STM4010 | STY3870 | ATGCGAT TTATTCA(ATGCGAT | 1 |
| 497 | CHIP4416 | STM/STY    | STM0525 | STY0573 | ATGAAGA TTAACGA(ATGAAGA | 1 |
| 498 | CHIP1180 | STM/STY    | STM0965 | STY0963 | ATGACAA TTATACC(ATGACAA | 0 |
| 499 | CHIP4442 | STM specil | STM0576 |         | ATGATCA TTAGAGT ATGATCA | 1 |
| 500 | CHIP1198 | STM/STY    | STM1637 | STY1434 | ATGGCGC TTATTGC(ATGGCGC | 1 |
| 501 | CHIP2850 | STM/STY    | STM1714 | STY1336 | ATGGGTA TTATTTCTATGGGTA | 1 |
| 502 | CHIP2770 | STM specil | STM1568 |         | ATGAGTA TTAAGTA(ATGAGTA | 1 |
| 503 | CHIP2890 | STM/STY    | STM1817 | STY1947 | ATGAATT TTAAGC(TTGAATT  | 1 |
| 504 | CHIP2818 | STM/STY    | STM1647 | STY1422 | ATGAAAC TTAGAAC(ATGAAAC | 1 |
| 505 | CHIP2916 | STM/STY    | STM1864 | STY2002 | ATGTGTA TTATAAC(GTGTGTA | 1 |
| 506 | CHIP2836 | STM/STY    | STM1674 | STY1390 | ATGACTA TTAATCC(ATGACTA | 1 |
| 507 | CHIP1137 | STM/STY    | STM1895 | STY2103 | ATGATAG TTATAAC(GTGATAG | 1 |
| 508 | CHIP4421 | STM/STY    | STM0534 | STY0582 | ATGTCTT(TTATAGC(ATGTCTT | 1 |
| 509 | CHIP4445 | STM/STY    | STM0580 | STY0622 | ATGGCTC TTATTGC GTGGCTC | 1 |

|     |          |            |         |          |                          |   |
|-----|----------|------------|---------|----------|--------------------------|---|
| 510 | CHIP1201 | STM/STY    | STM1654 | STY1412  | ATGCAAG TTATTTTC/ATGCAAG | 1 |
| 511 | CHIP1195 | STM/STY    | STM1583 | STY1482  | ATGCCAT TTAATAA1ATGCCAT  | 1 |
| 512 | CHIP4479 | STM/STY    | STM0343 | STY0376  | ATGTTGT TTATTCAC/ATGTTGT | 1 |
| 513 | CHIP2871 | STM/STY    | STM1769 | STY1283  | ATGCAAA TTAANAAT(ATGCAAA | 1 |
| 514 | CHIP2791 | STM/STY    | STM1606 | STY1458  | ATGCGTC TTAGCCA ATGCGTC  | 1 |
| 515 | CHIP2919 | STM specil | STM1871 |          | ATGGCGC TTAGAGC GTGGCGC  | 1 |
| 516 | CHIP2935 | STM/STY    | STM1898 | STY2106  | ATGTCGA TTAGCGC GTGTCGA  | 1 |
| 517 | CHIP2553 | STM/STY    | STM3802 | STY3977  | ATGGAAA TTAGCGT ATGGAAA  | 1 |
| 518 | CHIP4210 | STM/STY    | STM2987 | STY3127  | ATGTCAG TTATTCT1ATGTCAG  | 1 |
| 519 | CHIP4322 | STM specil | STM2705 |          | ATGGTAT TTATTGT(GTGGTAT  | 1 |
| 520 | CHIP4250 | STM specil | STM3084 |          | ATGTTTA(TTAGGTG TTGTTTA  | 1 |
| 521 | CHIP4274 | STM/STY    | STM3133 | STY3303  | ATGCCAC TTATTTA/ATGCCAC  | 1 |
| 522 | CHIP4578 | STM/STY    | STM3914 | STY3640  | ATGTGGC TTAACCT(TTGTGGC  | 1 |
| 523 | CHIP2500 | STM/STY    | STM3661 | STY4137  | ATGCAGC TTATTTA1ATGCAGC  | 1 |
| 524 | CHIP4636 | STM/STY    | STM1186 | STY1226a | ATGGTCG TTAAGC CGCGTCC   | 1 |
| 525 | CHIP4197 | STM/STY    | STM2968 | STY3107  | ATGTCTT(TTACTGT(ATGTCTT  | 1 |
| 526 | CHIP4309 | STM/STY    | STM2687 | STY2873  | ATGGTAT TTATCCG GTGGTAT  | 1 |
| 527 | CHIP4237 | STM/STY    | STM3053 | STY3209  | ATGACAC TTAACGG ATGACAC  | 1 |
| 528 | CHIP4261 | STM/STY    | STM3106 | STY3259  | ATGGAGT TTAATAC1ATGGAGT  | 1 |
| 529 | CHIP4599 | STM/STY    | STM4131 | STY3743  | ATGGCTA TTAACCC(ATGGCTA  | 1 |
| 530 | CHIP4615 | STM/STY    | STM3109 | STY3264  | ATGAAAA TTATTTTC/ATGAAAA | 1 |
| 531 | CHIP4631 | STM/STY    | STM0618 | STY0667  | ATGTCTT TTAATTC(ATGTCTT  | 1 |
| 532 | CHIP4647 | STM/STY    |         | STY2447  | ATGCCCT TTAATCC(CTGCCCT  | 0 |
| 533 | CHIP1604 | STM/STY    | STM2797 | STY2917  | ATGACAG TTATGGA1ATGACAG  | 1 |
| 534 | CHIP4504 | STM/STY    | STM1691 | STY1370  | ATGGCTG TTAAGC ATGGCTG   | 1 |
| 535 | CHIP1981 | STM/STY    | STM3039 | STY3195  | ATGACTG TTAACGC ATGACTG  | 1 |
| 536 | CHIP4490 | STM/STY    | STM0365 | STY0397  | ATGGAGC TTAGCGG ATGGAGC  | 1 |
| 537 | CHIP4514 | STM/STY    | STM3653 | STY4148  | ATGAAAA TTATTTCC(ATGAAAA | 1 |
| 538 | CHIP4530 | STM/STY    | STM2202 | STY2437  | ATGACAG TTATGCG ATGACAG  | 1 |
| 539 | CHIP4546 | STM specil | STM2237 |          | ATGCCTC TTAGATT(ATGCCTC  | 1 |
| 540 | CHIP4562 | STM/STY    | STM2159 | STY2389  | ATGTACG TTATGCG ATGTACG  | 1 |
| 541 | CHIP4524 | STM/STY    | STM2194 | STY2428  | ATGGAAA TTATCGG ATGGAAA  | 1 |
| 542 | CHIP1664 | STM/STY    | STM2106 | STY2318  | ATGAAGA TTATCCC(ATGAAGA  | 1 |
| 543 | CHIP4564 | STM/STY    | STM2164 | STY2394  | ATGAGTG TTAATCA1GTGAGTG  | 1 |
| 544 | CHIP2088 | STM/STY    | STM3694 | STY4102  | ATGATTA TTAGGCG ATGATTA  | 1 |
| 545 | CHIP1920 | STM/STY    | STM3440 | STY4358  | ATGATTG TTACGCC ATGATTG  | 1 |
| 546 | CHIP1936 | STM/STY    | STM4358 | STY4715  | ATGATTT TTAATTC(ATGATTT/ | 1 |
| 547 | CHIP1914 | STM/STY    | STM3433 | STY4365  | ATGTTAC TTACATC/ATGTTAC/ | 1 |
| 548 | CHIP1930 | STM/STY    | STM3038 | STY3194  | ATGGTTT TTAGCAC ATGGTTT  | 1 |
| 549 | CHIP1946 | STM/STY    | STM4380 | STY4736  | ATGATAG TTAAGA1ATGATAG   | 1 |
| 550 | CHIP1970 | STM/STY    | STM4548 | STY4901  | ATGGAAA TTATACC(ATGGAAA  | 1 |
| 551 | CHIP1986 | STM/STY    | STM4333 | STY4693  | ATGGCGC TTAGCAC ATGGCGC  | 1 |
| 552 | CHIP1635 | STM/STY    | STM2156 | STY2385  | ATGAAAA TTATTTCC(ATGAAAA | 1 |
| 553 | CHIP0346 | STM/STY    | STM0666 | STY0711  | ATGGCAT TTATTTCC(ATGGCAT | 1 |
| 554 | CHIP2253 | STM/STY    | STM3092 | STY3245  | ATGAAAA TTACCCG ATGAAAA  | 1 |
| 555 | CHIP2269 | STM/STY    | STM1075 | STY1097  | ATGGAAC TTAGGGC ATGGAAC  | 1 |
| 556 | CHIP3361 | STM/STY    | STM0781 | STY0814  | ATGGCGC TTAATTC(ATGGCGC  | 1 |
| 557 | CHIP3409 | STM/STY    | STM0849 | STY0888  | ATGACGC TTAATTC/ATGACGC  | 1 |
| 558 | CHIP2198 | STM/STY    | STM3323 | STY3502  | ATGGTAC TTATGTT1ATGGTAC  | 1 |
| 559 | CHIP3364 | STM/STY    | STM0786 | STY0819  | ATGAATA TTAATTC GTGAATA  | 1 |
| 560 | CHIP3396 | STM/STY    | STM0826 | STY0863  | ATGTCCG TTAGCGT ATGTCCG  | 1 |
| 561 | CHIP2185 | STM/STY    | STM3054 | STY3210  | ATGAGCA TTATTCG ATGAGCA  | 1 |

|     |          |              |         |         |                          |   |
|-----|----------|--------------|---------|---------|--------------------------|---|
| 562 | CHIP0318 | STM/STY      | STM0263 | STY0284 | ATGCTTA TTAAGCT ATGCTTA  | 1 |
| 563 | CHIP2225 | STM/STY      | STM3223 | STY3403 | ATGATAC TTACGCA ATGATAC  | 1 |
| 564 | CHIP0358 | STM/STY      | STM1397 | STY1723 | ATGATGA TTACCTT ATGATGA  | 1 |
| 565 | CHIP3391 | STM/STY      | STM0819 | STY0854 | ATGAATA TTAGTCC ATGAATA  | 1 |
| 566 | CHIP3423 | STM/STY      | STM0866 | STY0899 | ATGCAGA TTAGACT ATGCAGA  | 1 |
| 567 | CHIP4353 | STM/STY      | STM0409 | STY0447 | ATGATGC TTACGCA GTGATGC  | 1 |
| 568 | CHIP4306 | STM/STY      | STM2682 |         | ATGTGTC TTATGAA ATGTGTC  | 1 |
| 569 | CHIP3688 | STM specil   | STM4497 |         | ATGATCG TTAACGA GTGATCG  | 1 |
| 570 | CHIP3706 | STM/STY      | STM4528 | STY4886 | ATGCCGA TTAACCA ATGCCGA  | 1 |
| 571 | CHIP3600 | STM/STY      | STM4318 | STY4518 | ATGATCT TTAACCA ATGATCT  | 1 |
| 572 | CHIP3545 | STM specil   | STM4203 |         | ATGAACA TTATCGC ATGAACA  | 1 |
| 573 | CHIP3562 | STM/STY      | STM4222 | STY4418 | ATGAAAA TTAGTGG ATGAAAA  | 1 |
| 574 | CHIP3539 | STM specil   | STM4197 |         | ATGGATT TTATATT ATGGATT  | 1 |
| 575 | CHIP3532 | STM/STY      | STM4181 | STY4399 | ATGATGA TTACGGA ATGATGA  | 1 |
| 576 | CHIP0787 | STM/STY      | STM2016 | STY2219 | ATGAGCC TTATGTT ATGAGCC  | 1 |
| 577 | CHIP4051 | STM specil   | STM2744 |         | ATGAAAA TTAACGG ATGAAAA  | 1 |
| 578 | CHIP4044 | STM specil   | STM2735 |         | ATGCTGA TTAGCTT ATGCTGA  | 1 |
| 579 | CHIP4045 | STM/STY      | STM2737 | STY4643 | ATGAGTA TTAACCA ATGAGTA  | 1 |
| 580 | CHIP2145 | STM/STY      | STM3283 | STY3464 | ATGTCTC TTAGCGA ATGTCTC  | 1 |
| 581 | CHIP2188 | STM/STY      | STM3047 | STY3203 | ATGGATA TTAGATT ATGGATA  | 1 |
| 582 | CHIP2209 | STM/STY      | STM3259 | STY3442 | ATGAAAC TTACCC ATGAAAC   | 1 |
| 583 | CHIP1194 | STM/STY      | STM1591 | STY1474 | ATGAACC TTA AAC ATGAACC  | 1 |
| 584 | CHIP1139 | STM/STY      | STM1534 | STY1529 | ATGACTA TTATTGC ATGACTA  | 1 |
| 585 | CHIP1219 | STM/STY      | STM1611 | STY1453 | ATGGTGC TTAATCC ATGGTGC  | 1 |
| 586 | CHIP1274 | STM/STY      | STM3392 | STY3572 | ATGAAAA TTATTTAC ATGAAAA | 1 |
| 587 | CHIP1381 | STM/STY      | STM0078 | STY0088 | ATGACAT TTAGCCG ATGACAT  | 1 |
| 588 | CHIP3988 | STM/STY      | STM1500 | STY1563 | ATGATGA TTATTGC ATGATGA  | 1 |
| 589 | CHIP3120 | STM/STY      | STM2561 | STY2808 | ATGAAAA TTAGATA ATGAAAA  | 1 |
| 590 | CHIP3097 | STM/STY      |         |         | ATGTATC TTA AATA TTGTATC | 0 |
| 591 | CHIP3075 | STM/STY      | STM2452 | STY2689 | ATGCAAA TTAACGG ATGCAAA  | 1 |
| 592 | CHIP3124 | STM/STY      | STM2566 |         | ATGGTGT TTAGTTA TTGGTGT  | 1 |
| 593 | CHIP3093 | STM/STY      | STM2495 | STY2736 | ATGACCG TTAACCG ATGACCG  | 1 |
| 594 | CHIP3111 | STM/STY      | STM2538 | STY2784 | ATGCCGA TTAATGC ATGCCGA  | 1 |
| 595 | CHIP3332 | STM/STY      | STM0724 | STY0765 | ATGTATT TTAATAT ATGTATT  | 1 |
| 596 | CHIP3281 | STM/STY      | STM0636 | STY0687 | ATGAAAA TTACAAT ATGAAAA  | 1 |
| 597 | CHIP3000 | STM/STY      | STM2303 | STY2533 | ATGGGCC TTATGAT ATGGGCC  | 1 |
| 598 | CHIP0769 | STM specil   | PSLT048 |         | ATGCGTC TTACGCA ATGCGTC  | 1 |
| 599 | CHIP0979 | STM specil   | PSLT026 |         | ATGAACA TTAGGGA ATGAACA  | 1 |
| 600 | CHIP1037 | STM specil   | PSLT042 |         | ATGCCGA TTACCGC ATGCCGA  | 1 |
| 601 | CHIP0424 | STM/STY      | PSLT012 |         | ATGGCGT TTATCCG ATGGCGT  | 1 |
| 602 | CHIP0426 | STM/STY      | PSLT007 | STY4846 | ATGTCGC TTAGGAC TCGCTGC  | 0 |
| 603 | CHIP0422 | STM specil   | PSLT013 |         | ATGAGTG TTAGAGC ATGAGTG  | 1 |
| 604 | CHIP1115 | STM specil   | PSLT107 |         | ATGATGG TTAGAAT ATGATGG  | 0 |
| 605 | CHIP1088 | STM specil   | PSLT074 |         | ATGCGGA TTAAGGC CGTCGGA  | 1 |
| 606 | CHIP1012 | none         | R460002 |         | ATGAAGT TTATTTG ATGAAGT  | 0 |
| 607 | CHIP4778 | STM specific |         |         | CCCGTTT GTCTACG CCCGTTT  | 0 |
| 608 | CHIP4782 | STM/STY      |         |         | GCAGCAC TTAAGAC GCAGCAC  | 0 |
| 609 | CHIP4786 | STM/STY      |         |         | CGCGTTA TTTTGCT CGCGTTA  | 0 |
| 610 | CHIP4790 | STM/STY      |         |         | GATCTGG TCAATAG GATCTGG  | 0 |
| 611 | CHIP4794 | STM/STY      |         |         | CGCTCCG CTGCCAA CGCTCCG  | 0 |
| 612 | CHIP4798 | STM/STY      |         |         | GCCGCGT GATTTTC GCCGCGT  | 0 |
| 613 | CHIP5004 | STM/STY      |         | STY1255 | ATGTTCA TTACAGC ATGTTCA  | 0 |

|     |          |              |         |         |                              |   |
|-----|----------|--------------|---------|---------|------------------------------|---|
| 614 | CHIP5020 | STY specific |         | STY1595 | ATGACAG TTATCTG(ATGACAG      | 0 |
| 615 | CHIP5036 | STY specific |         | STY1612 | ATGACAC TTATTGA(ATGACAC      | 0 |
| 616 | CHIP5051 | STY specific |         | STY1628 | ATGTCAC TTAATCT(ATGTCAC      | 0 |
| 617 | CHIP5067 | STM/STY      |         | STY1853 | ATGCTTA TTATATC(ATGCTTA      | 0 |
| 618 | CHIP4996 | STY specific |         | STY1068 | ATGGCAG TTAGTTT(ATGGCAG      | 0 |
| 619 | CHIP5030 | STY specific |         | STY1606 | ATGATGC TTAATAT(ATGATGC      | 0 |
| 620 | CHIP5046 | STY specific |         | STY1622 | ATGTACTIONTTAGTAT ATGTACTION | 0 |
| 621 | CHIP5061 | STY specific |         | STY1643 | ATGCAAA TTACAAC ATGCAAA      | 0 |
| 622 | CHIP4990 | STY specific |         | STY1062 | ATGGATA TTAGCCG GTGGATA      | 0 |
| 623 | CHIP5098 | STY specific |         | STY2038 | ATGCGCA TTAGCCG GTGCGCA      | 0 |
| 624 | CHIP5113 | STY specific |         | STY2054 | ATGAAGC TTACTION(ATGAAGC     | 0 |
| 625 | CHIP5040 | STY specific |         | STY1616 | ATGGCGA TTAGCCG ATGGCGA      | 0 |
| 626 | CHIP5055 | STY specific |         | STY1632 | ATGGCTG TTTTTT ATGGCTG       | 0 |
| 627 | CHIP5071 | STY specific |         | STY1889 | ATGACTA TTACAAT(ATGACTA      | 0 |
| 628 | CHIP5000 | STY specific |         | STY1072 | ATGGCTA TTATCCA ATGGCTA      | 0 |
| 629 | CHIP5108 | STY specific |         | STY2048 | ATGACCA TTAAGC ATGACCA       | 0 |
| 630 | CHIP5123 | STY specific |         | STY2064 | ATGAAAA TTAATGC ATGAAAA      | 0 |
| 631 | CHIP5057 | STY specific |         | STY1635 | ATGGCGC TTAGCCA ATGGCGC      | 0 |
| 632 | CHIP5073 | STY specific |         | STY1891 | ATGTATA TTACTION(ATGTATA     | 0 |
| 633 | CHIP5086 | STY specific |         | STY2025 | ATGGATT TTACCTT(ATGGATT      | 0 |
| 634 | CHIP5195 | STY specific |         | STY3091 | ATGGAAA TTATTCA ATGGAAA      | 0 |
| 635 | CHIP5125 | STY specific |         | STY2066 | ATGGAAA TTACTION ATGGAAA     | 0 |
| 636 | CHIP5141 | STY specific |         | STY2296 | ATGAAGG TTATGAA ATGAAGG      | 0 |
| 637 | CHIP5350 | STY specific |         | STY4590 | ATGATGG TTAACGA ATGATGG      | 0 |
| 638 | CHIP5372 | STY specific |         | STY4629 | ATGTCAC TTAATAAT ATGTCAC     | 0 |
| 639 | CHIP5384 | STY specific |         | STY4652 | ATGGAAA TTATTCA ATGGAAA      | 0 |
| 640 | CHIP5321 | STY specific |         | STY4557 | ATGACGA TTAGAGC ATGACGA      | 0 |
| 641 | CHIP5335 | STY specific |         | STY4574 | ATGAGCC TTACCTG ATGAGCC      | 0 |
| 642 | CHIP5351 | STY specific |         | STY4591 | ATGAGCC TTACGGT ATGAGCC      | 0 |
| 643 | CHIP5414 | STY specific |         | STY4826 | ATGTTTC TTAATGC ATGTTTC      | 0 |
| 644 | CHIP5429 | STY specific |         | STY4851 | ATGAGTC TTTTTT TTGAGTC       | 0 |
| 645 | CHIP5369 | STM/STY      |         | STY4625 | ATGAAAA TTATTCC ATGAAAA      | 0 |
| 646 | CHIP5303 | STY specific |         | STY4528 | ATGAGAG TTATTGA ATGAGAG      | 0 |
| 647 | CHIP5318 | STY specific |         | STY4552 | ATGTCTC TTAGGCA ATGTCTC      | 0 |
| 648 | CHIP5415 | STY specific |         | STY4827 | ATGGCCA TTAGCCC GTGGCCA      | 0 |
| 649 | CHIP0777 | STM/STY      | STM3041 | STY3197 | ATGTTTG TTATAGC ATGTTTG      | 0 |
| 650 | CHIP0793 | STM/STY      | STM2397 | STY2634 | ATGAAGG TTATTCA ATGAAGG      | 1 |
| 651 | CHIP0809 | STM/STY      | STM2029 | STY2234 | ATGTCAG TTAGGCT ATGTCAG      | 1 |
| 652 | CHIP0833 | STM/STY      | STM3577 | STY4234 | ATGAAAA TTAGAAG ATGAAAA      | 1 |
| 653 | CHIP2664 | STM/STY      | STM0123 | STY0143 | ATGGCAG TTATGCG GTGGCAG      | 1 |
| 654 | CHIP2680 | STM/STY      | STM0158 | STY0181 | ATGCTAG TTAACC GTGCTAG       | 1 |
| 655 | CHIP2674 | STM/STY      | STM0148 | STY0170 | ATGGCAA TTAGATC ATGGCAA      | 1 |
| 656 | CHIP2690 | STM specil   | STM0174 |         | ATGAAGA TTAGCGA ATGAAGA      | 1 |
| 657 | CHIP2706 | STM/STY      | STM0193 | STY0220 | ATGCGTG TTACGCT ATGCGTG      | 1 |
| 658 | CHIP2722 | STM/STY      | STM0234 | STY0259 | ATGAACA TTAGCAG ATGAACA      | 1 |
| 659 | CHIP2738 | STM/STY      | STM1514 | STY1547 | ATGAGAT TTATGCT ATGAGAT      | 1 |
| 660 | CHIP0772 | STM specil   | STM3640 |         | ATGGAGT TTATTCC ATGGAGT      | 1 |
| 661 | CHIP3316 | STM/STY      | STM0697 | STY0735 | ATGAAAA TTAATT ATGAAAA       | 1 |
| 662 | CHIP0782 | STM/STY      | STM1965 | STY2173 | ATGTCAT TTATACA ATGTCAT      | 1 |
| 663 | CHIP0798 | STM/STY      | STM3711 | STY4084 | ATGAAAA TTAACG ATGAAAA       | 1 |
| 664 | CHIP0814 | STM/STY      | STM2024 | STY2228 | ATGAACG TTATTCT ATGAACG      | 1 |
| 665 | CHIP0830 | STM/STY      | STM1725 | STY1326 | ATGCAAA TTAATAT ATGCAAA      | 1 |

|     |          |            |         |         |                          |   |
|-----|----------|------------|---------|---------|--------------------------|---|
| 666 | CHIP2645 | STM/STY    | STM0081 | STY0093 | ATGAAAC TTAGTGC ATGAAAC  | 1 |
| 667 | CHIP2591 | STM/STY    | STM3853 | STY3930 | ATGGACA TTAATCT ATGGACA  | 1 |
| 668 | CHIP2615 | STM/STY    | STM0015 | STY0015 | ATGTCTA TTAATCT(ATGTCTA  | 1 |
| 669 | CHIP0856 | STM/STY    | STM3110 | STY3265 | ATGCAAG TAAACT(ATGCAAG   | 1 |
| 670 | CHIP3239 | STM/STY    | STM3312 | STY3491 | ATGCTGT TTAATTC(ATGCTGT  | 1 |
| 671 | CHIP3255 | STM/STY    | STM3347 | STY3527 | ATGTTCA TTAATCG(ATGTTCA  | 1 |
| 672 | CHIP3279 | STM/STY    | STM0632 | STY0682 | ATGGGTG TTAATTC ATGGGTG  | 1 |
| 673 | CHIP3825 | STM/STY    | STM1110 |         | ATGGAAT TAAACT ATGGAAT   | 1 |
| 674 | CHIP3841 | STM/STY    | STM1152 | STY1189 | ATGGTGA TTAATTC ATGGTGA  | 1 |
| 675 | CHIP2417 | STM/STY    | STM3497 | STY4299 | ATGAAAG TTATTCG(ATGAAAG  | 1 |
| 676 | CHIP2433 | STM specil | STM3522 |         | ATGCGAA TTAATTC ATGCGAA  | 1 |
| 677 | CHIP2449 | STM/STY    | STM3544 | STY4267 | ATGATCT TTAATTC(ATGATCT, | 1 |
| 678 | CHIP3714 | STM/STY    | STM4541 | STY4894 | ATGCTGA TTAATTC ATGCTGA  | 1 |
| 679 | CHIP3859 | STM/STY    | STM1204 | STY1244 | ATGTCTT TTAGAAC ATGTCTT  | 1 |
| 680 | CHIP2435 | STM specil | STM3527 |         | ATGGAAG TTAATTC ATGGAAG  | 1 |
| 681 | CHIP2451 | STM/STY    | STM3552 |         | ATGAAAC TTAAGGG ATGAAAC  | 1 |
| 682 | CHIP3716 | STM/STY    | STM4545 | STY4898 | ATGGGTA TTACACG ATGGGTA  | 1 |
| 683 | CHIP3732 | STM/STY    | STM4585 | STY4932 | ATGTTAC TTAACGC ATGTTAC, | 1 |
| 684 | CHIP3764 | STM specil | STM0295 |         | ATGTTAA TTACACA GTGTTAA  | 1 |
| 685 | CHIP2461 | STM/STY    | STM3576 | STY4235 | ATGTCGA TTAGTTT ATGTCGA  | 1 |
| 686 | CHIP3726 | STM specil | STM4572 |         | ATGAAGT TTATTGA GTGAAGT  | 1 |
| 687 | CHIP4038 | STM specil | STM2726 |         | ATGTCAA TTAGAAC ATGTCAA  | 1 |
| 688 | CHIP4054 | STM specil | STM2747 |         | ATGCTTT TTAATA ATGCTTT   | 1 |
| 689 | CHIP4070 | STM specil | STM2763 |         | ATGGCAA TTATCTG ATGGCAA  | 1 |
| 690 | CHIP4086 | STM/STY    | STM2788 | STY2908 | ATGGATA TTAACCG ATGGATA  | 1 |
| 691 | CHIP3568 | STM/STY    | STM4244 | STY4440 | ATGCTGG TTAGTAA ATGCTGG  | 1 |
| 692 | CHIP3592 | STM/STY    | STM4295 | STY4494 | ATGAGGA TTAGGCA ATGAGGA  | 1 |
| 693 | CHIP3424 | STM/STY    | STM0868 | STY0901 | ATGACCG TTATGCG ATGACCG  | 1 |
| 694 | CHIP3440 | STM specil | STM0896 |         | ATGGGCA TTAATTC ATGGGCA  | 1 |
| 695 | CHIP3080 | STM/STY    | STM2477 | STY2714 | ATGTCGC TTAGTCC ATGTCGC  | 1 |
| 696 | CHIP3480 | STM specil | STM0948 |         | ATGATGA TTAATTC ATGATGA  | 1 |
| 697 | CHIP3074 | STM/STY    | STM2450 | STY2687 | ATGAGCA TTACCGT ATGAGCA  | 1 |
| 698 | CHIP3474 | STM/STY    | STM0936 | STY0932 | ATGATGA TTATGCG ATGATGA  | 1 |
| 699 | CHIP3490 | STM/STY    | STM0969 | STY0967 | ATGCCGA TTATGTG ATGCCGA  | 1 |
| 700 | CHIP3506 | STM/STY    | STM0994 | STY0996 | ATGATTG TTAATTC ATGATTG, | 1 |
| 701 | CHIP3531 | STM specil | STM1041 |         | ATGGACA TTATCGA GTGGACA  | 0 |
| 702 | CHIP4123 | STM/STY    | STM4093 | STY3777 | ATGGCAC TTAACCC GTGGCAC  | 1 |
| 703 | CHIP4157 | STM specil | STM2901 |         | ATGGATA TTAATA ATGGATA   | 1 |
| 704 | CHIP3613 | STM/STY    | STM4343 | STY4703 | ATGCAAA TTAGCCA GTGCAAA  | 1 |
| 705 | CHIP3061 | STM/STY    | STM2420 | STY2655 | ATGATGG TTATACC GTGATGG  | 1 |
| 706 | CHIP3461 | STM specil | STM0918 |         | ATGGACC TTAGCTG ATGGACC  | 1 |
| 707 | CHIP3109 | STM/STY    | STM2533 | STY2779 | ATGACCA TTAAGCG ATGACCA  | 1 |
| 708 | CHIP3125 | STM/STY    | STM2569 | STY2815 | ATGTTCC TTATTCG ATGTTCC  | 1 |
| 709 | CHIP3119 | STM/STY    | STM2560 | STY2807 | ATGAAAA TTAATCG ATGAAAA  | 1 |
| 710 | CHIP3616 | STM/STY    | STM4349 | STY4709 | ATGGGCC TTAGTCG ATGGGCC  | 1 |
| 711 | CHIP2968 | STM/STY    | STM2009 | STY2211 | ATGGAAA TTAGCGA ATGGAAA  | 1 |
| 712 | CHIP3008 | STM/STY    | STM2316 | STY2546 | ATGATGC TTACATC GTGATGC  | 1 |
| 713 | CHIP3032 | STM/STY    | STM2360 | STY2590 | ATGACTG TTAATAA ATGACTG  | 1 |
| 714 | CHIP2284 | STM/STY    | STM1198 | STY1237 | ATGTTTT TTAATTC(ATGTTTT  | 1 |
| 715 | CHIP0195 | STM/STY    | STM2056 | STY2261 | ATGAAGC TTAATTC ATGAAGC  | 1 |
| 716 | CHIP0219 | STM/STY    | STM3445 |         | ATGTCTA TTAGCCC GTGTCTA  | 0 |
| 717 | CHIP2318 | STM/STY    | STM1488 | STY1576 | ATGGTTG TTAACCC GTGGTTG  | 1 |

|     |          |            |         |         |                          |   |
|-----|----------|------------|---------|---------|--------------------------|---|
| 718 | CHIP0267 | STM/STY    | STM0304 | STY0341 | ATGATGG TTAATCA ATGATGG  | 1 |
| 719 | CHIP2366 | STM/STY    | STM1441 | STY1681 | ATGAAAC TTACGCC ATGAAAC  | 1 |
| 720 | CHIP3635 | STM/STY    | STM4397 | STY4753 | ATGGCCA TTACAGA ATGGCCA  | 1 |
| 721 | CHIP0277 | STM/STY    | STM0115 | STY0134 | ATGCCAG TTATCGC ATGCCAG  | 1 |
| 722 | CHIP2949 | STM/STY    | STM1941 | STY2152 | ATGCTGA TTAATTT CATGCTGA | 1 |
| 723 | CHIP2965 | STM specil | STM2006 |         | ATGGGCA TTATTCC ATGGGCA  | 1 |
| 724 | CHIP3661 | STM specil | STM4435 |         | ATGAATA TTATTGC ATGAATA  | 1 |
| 725 | CHIP3005 | STM/STY    | STM2313 | STY2544 | ATGGTGG TTA AAC ATGGTGG  | 1 |
| 726 | CHIP3021 | STM/STY    | STM2340 | STY2570 | ATGATTA TTA AAC ATGATTA  | 1 |
| 727 | CHIP3671 | STM/STY    | STM4464 | STY4802 | ATGGGTA TTACATC ATGGGTA  | 1 |
| 728 | CHIP3687 | STM specil | STM4496 |         | ATGAATA TTA CTGA ATGAATA | 1 |
| 729 | CHIP3031 | STM/STY    | STM2359 | STY2589 | ATGAGTA TTATTTT CATGAGTA | 1 |
| 730 | CHIP2283 | STM/STY    | STM1190 | STY1229 | ATGCAAA TTA CTTA ATGCAAA | 1 |
| 731 | CHIP2307 | STM/STY    | STM1343 | STY1767 | ATGCGTT TTA AAT ATGCGTT  | 1 |
| 732 | CHIP2323 | STM/STY    | STM1084 | STY1111 | ATGTTGA TTA AATA ATGTTGA | 1 |
| 733 | CHIP1341 | STM/STY    | STM0301 | STY0336 | ATGAAGT TTATCTG ATGAAGT  | 1 |
| 734 | CHIP1357 | STM/STY    | STM0232 | STY0255 | ATGAGTC TTAGGCG ATGAGTC  | 1 |
| 735 | CHIP1469 | STM/STY    | STM0443 | STY0485 | ATGAGAC TTA ACC ATGAGAC  | 1 |
| 736 | CHIP1397 | STM/STY    | STM0153 | STY0176 | ATGGCTA TTACATC ATGGCTA  | 1 |
| 737 | CHIP3914 | STM/STY    | STM1317 | STY1796 | ATGGAAC TTA AATA ATGGAAC | 1 |
| 738 | CHIP3938 | STM specil | STM1360 |         | ATGTCTC TTA CTGG ATGTCTC | 1 |
| 739 | CHIP0517 | STM/STY    | STM2782 | STY2900 | ATGAAAA TTAGCAA GTGAAAA  | 1 |
| 740 | CHIP3964 | STM/STY    | STM1460 | STY1662 | ATGACTA TTACGGA ATGACTA  | 1 |
| 741 | CHIP3980 | STM/STY    | STM1486 | STY1579 | ATGAGTC TTAGGCG GTGAGTC  | 1 |
| 742 | CHIP0573 | STM/STY    | STM4229 | STY4425 | ATGAAGA TTA CTTA ATGAAGA | 1 |
| 743 | CHIP1336 | STM/STY    | STM0306 | STY0351 | ATGAAAA TTA AAAG ATGAAAA | 1 |
| 744 | CHIP1448 | STM/STY    | STM0377 | STY0409 | ATGTCGG TTATCGC ATGTCGG  | 1 |
| 745 | CHIP1458 | STM/STY    | STM0407 | STY0445 | ATGTTAA TTAGATT GTGTTAA  | 1 |
| 746 | CHIP1386 | STM/STY    | STM0124 | STY0144 | ATGATTA TTA ACAT ATGATTA | 1 |
| 747 | CHIP1498 | STM/STY    | STM2363 | STY2593 | ATGGTCT TTACGTC ATGGTCT  | 1 |
| 748 | CHIP0488 | STM/STY    | STM2785 | STY2904 | ATGCGTC TTA ACC ATGCGTC  | 1 |
| 749 | CHIP3943 | STM/STY    | STM1370 | STY1753 | ATGTCTC TTA ACCG ATGTCTC | 1 |
| 750 | CHIP0544 | STM/STY    | STM3561 | STY4251 | ATGAGTC TTATGCC ATGAGTC  | 1 |
| 751 | CHIP1557 | STM/STY    | STM0461 | STY0504 | ATGCGTA TTACGCC ATGCGTA  | 1 |
| 752 | CHIP1573 | STM/STY    | STM0568 | STY0617 | ATGAAAA TTA ATGA GTGAAAA | 1 |
| 753 | CHIP4742 | STM/STY    | STM2210 | STY2446 | ATGGCCT TTA ACGA ATGGCCT | 0 |
| 754 | CHIP1997 | STM/STY    | STM4412 | STY4771 | ATGACCT TTAGCGC ATGACCT  | 1 |
| 755 | CHIP3169 | STM/STY    | STM2645 | STY2838 | ATGACAC TTAGTAA GTGACAC  | 1 |
| 756 | CHIP2045 | STM/STY    | STM3641 | STY4161 | ATGATTG TTA AAC ATGATTG  | 1 |
| 757 | CHIP3219 | STM/STY    | STM3275 | STY3458 | ATGGCAG TTAGGCC ATGGCAG  | 1 |
| 758 | CHIP1512 | STM/STY    | STM2292 | STY2522 | ATGTTGG TTA AGAT ATGTTGG | 1 |
| 759 | CHIP1528 | STM/STY    | STM2540 | STY2786 | ATGGATT TTA AAAA ATGGATT | 1 |
| 760 | CHIP1045 | STM/STY    | STM0027 | STY0032 | ATGCCTC TTA AATA ATGCCTC | 1 |
| 761 | CHIP2000 | STM/STY    | STM4415 | STY4774 | ATGAAAA TTA CGCG ATGAAAA | 1 |
| 762 | CHIP2016 | STM/STY    | STM4543 | STY4896 | ATGAAAA TTA ATAC ATGAAAA | 1 |
| 763 | CHIP3142 | STM specil | STM2598 |         | ATGAGCA TTAGTTG ATGAGCA  | 1 |
| 764 | CHIP2018 | STM/STY    | STM4550 | STY4903 | ATGGCCT TTA CTTT ATGGCCT | 1 |
| 765 | CHIP2034 | STM/STY    | STM3709 | STY4086 | ATGCGTG TTAGGCA ATGCGTG  | 1 |
| 766 | CHIP2050 | STM/STY    | STM3620 | STY4180 | ATGGCGA TTATCGC ATGGCGA  | 1 |
| 767 | CHIP3214 | STM/STY    | STM3268 | STY3451 | ATGCAAG TTA CTCC GTGCAAG | 1 |
| 768 | CHIP1515 | STM/STY    | STM2282 | STY2511 | ATGAAAA TTAGTCA ATGAAAA  | 1 |
| 769 | CHIP0722 | STM/STY    | STM2277 | STY2506 | ATGAATC TTAGATC ATGAATC  | 1 |

|     |          |            |         |          |         |          |         |   |
|-----|----------|------------|---------|----------|---------|----------|---------|---|
| 770 | CHIP0738 | STM/STY    | STM2894 | STY3017  | ATGAAAA | TTAATTC  | ATGAAAA | 1 |
| 771 | CHIP1805 | STM/STY    | STM4083 | STY3787  | ATGACCA | TTACGGT  | ATGACCA | 1 |
| 772 | CHIP1837 | STM/STY    | STM0699 | STY0737  | ATGAGTA | TTATTCG  | ATGAGTA | 1 |
| 773 | CHIP1869 | STM/STY    | STM0737 | STY0780  | ATGAGTA | TTACACG  | ATGAGTA | 1 |
| 774 | CHIP0675 | STM/STY    | STM4005 | STY3876  | ATGCAAC | TTACTCC  | ATGCAAC | 1 |
| 775 | CHIP0669 | STM/STY    | STM3469 | STY4327  | ATGATCC | TTAACGC  | ATGATCC | 1 |
| 776 | CHIP1824 | STM/STY    | STM3999 | STY3881  | ATGGTTC | TTAGTGC  | ATGGTTC | 1 |
| 777 | CHIP1856 | STM/STY    | STM0876 | STY0909  | ATGATAT | TTAGTGA  | ATGATAT | 1 |
| 778 | CHIP1888 | STM/STY    | STM3459 | STY4339  | ATGATTG | TTAGTCG  | ATGATTG | 1 |
| 779 | CHIP0614 | STM/STY    | STM4265 | STY4463  | ATGTCGC | TTACAGG  | ATGTCGC | 1 |
| 780 | CHIP0726 | STM/STY    | STM2579 | STY2825  | ATGGAAG | TTAATCT  | GTGGAAG | 1 |
| 781 | CHIP0105 | STM/STY    | STM1879 | STY2085  | ATGTTGC | TTATGCG  | ATGTTGC | 1 |
| 782 | CHIP0129 | STM/STY    | STM4172 | STY3713  | ATGAAAC | TTACCAG  | ATGAAAC | 1 |
| 783 | CHIP0145 | STM/STY    | STM4016 | STY3862  | ATGAAAT | TTAGAAG  | ATGAAAT | 1 |
| 784 | CHIP3951 | STM/STY    | STM1425 | STY1697  | ATGTGCA | TTATATC  | TGCAGAA | 1 |
| 785 | CHIP0401 | STM/STY    | STM2437 | STY2675  | ATGCGAG | TTACCGT  | GTGCGAG | 1 |
| 786 | CHIP0417 | STM/STY    | STM0946 | STY1844  | ATGGGGC | TTACTTA  | ATGGGGC | 0 |
| 787 | CHIP1286 | STM/STY    | STM2661 | STY2850  | ATGAATG | TTATATC  | ATGAATG | 1 |
| 788 | CHIP1302 | STM/STY    | STM0051 | STY0060  | ATGACAG | TTACGGC  | ATGACAG | 1 |
| 789 | CHIP4683 | STM/STY    | STM1007 |          | ATGCGCC | TTAGTTT  | ATGCGCC | 0 |
| 790 | CHIP4707 | STM/STY    | STM1859 | STY1994  | ATGTTCA | TTATAAC  | ATGTTCA | 1 |
| 791 | CHIP4739 | STM/STY    | STM3035 | STY3184  | ATGCATA | TTACTTT  | ATGCATA | 1 |
| 792 | CHIP3624 | STM/STY    | STM4372 | STY4728a | ATGACGT | TTAATAG  | ACGTGGA | 1 |
| 793 | CHIP0174 | STM/STY    | STM4504 | STY4859  | ATGCACA | TTATAAG  | ATGCACA | 1 |
| 794 | CHIP0190 | STM/STY    | STM2051 | STY2256  | ATGAATA | TTAGCGA  | ATGAATA | 1 |
| 795 | CHIP1233 | STM/STY    | STM4280 | STY4478  | ATGACAT | TTATGCA  | ATGACAT | 1 |
| 796 | CHIP1249 | STM/STY    | STM1905 | STY2113  | ATGTCTC | TTATGCG  | ATGTCTC | 1 |
| 797 | CHIP0438 | STM/STY    | STM4258 | STY4453  | ATGAGTA | TTAATCT  | ATGAGTA | 1 |
| 798 | CHIP1297 | STM/STY    | STM0009 | STY0009  | ATGGGCA | TTAGTGC  | ATGGGCA | 1 |
| 799 | CHIP1291 | STM specil | STM2696 |          | ATGATGA | TTACTGC  | ATGATGA | 1 |
| 800 | CHIP1307 | STM/STY    | STM0040 | STY0048  | ATGAGCA | TTACTGT  | ATGAGCA | 1 |
| 801 | CHIP0063 | STM/STY    | STM3919 | STY3636  | ATGACGC | TTATTAAC | ACGCGCC | 1 |
| 802 | CHIP0025 | STM/STY    | STM3962 | STY3597  | ATGTATC | TTAGCGT  | ATGTATC | 1 |
| 803 | CHIP0049 | STM/STY    | STM3937 | STY3622  | ATGAGTA | TTATTGT  | ATGAGTA | 1 |
| 804 | CHIP2177 | STM/STY    | STM3070 | STY3228  | ATGATGA | TTATAAA  | ATGACCG | 1 |
| 805 | CHIP1702 | STM/STY    | STM1754 | STY1296  | ATGAGAA | TTAAACG  | ATGAGAA | 1 |
| 806 | CHIP1718 | STM/STY    | STM1790 | STY1917  | ATGAGGC | TTATTGT  | ATGAGGC | 0 |
| 807 | CHIP1734 | STM/STY    | STM3017 | STY3162  | ATGATTT | TTAACGC  | ATGATTT | 1 |
| 808 | CHIP1750 | STM/STY    | STM2959 | STY3097  | ATGAAAA | TTAGCGT  | ATGAAAA | 1 |
| 809 | CHIP1766 | STM/STY    | STM2985 | STY3125  | ATGACAA | TTAACCC  | ATGACAA | 1 |
| 810 | CHIP1782 | STM/STY    | STM4053 | STY3819  | ATGAACA | TTAATCA  | ATGAACA | 1 |
| 811 | CHIP1768 | STM/STY    | STM2969 | STY3108  | ATGATTA | TTAAGCG  | TTGATTA | 1 |
| 812 | CHIP1792 | STM/STY    | STM4032 | STY3846  | ATGCCAC | TTAGGTC  | ATGCCAC | 1 |
| 813 | CHIP0022 | STM/STY    | STM3965 | STY3594  | ATGACAA | TTATTTT  | ATGACAA | 1 |
| 814 | CHIP0038 | STM/STY    | STM3949 | STY3610  | ATGACGC | TTATTTT  | ATGACGC | 1 |
| 815 | CHIP0062 | STM/STY    | STM3920 | STY3635  | ATGAAAG | TTATAAC  | GTGAAAG | 1 |
| 816 | CHIP0086 | STM/STY    | STM4138 | STY3741  | ATGAAAG | TTATTCG  | ATGAAAG | 1 |
| 817 | CHIP1739 | STM/STY    | STM2996 | STY3134  | ATGTTAA | TTAACGA  | ATGTTAA | 1 |
| 818 | CHIP0928 | STM/STY    | STM1742 | STY1309  | ATGAATG | TTATAAC  | ATGAATG | 1 |
| 819 | CHIP1779 | STM/STY    | STM4081 | STY3789  | ATGCGAC | TTAAGCC  | ATGCGAC | 1 |
| 820 | CHIP4392 | STM/STY    | STM0483 | STY0527  | ATGACCG | TTAATGC  | ATGACCG | 1 |
| 821 | CHIP4424 | STM specil | STM0538 |          | ATGAAGC | TTATTTT  | ATGAAGC | 1 |



|     |          |            |         |          |                           |   |
|-----|----------|------------|---------|----------|---------------------------|---|
| 822 | CHIP4448 | STM/STY    | STM0585 | STY0628  | ATGAACA TTAGAAA ATGAACA   | 1 |
| 823 | CHIP1182 | STM/STY    | STM0976 | STY0976  | ATGAAAG TTAACA/ATGAAAG    | 1 |
| 824 | CHIP4466 | STM/STY    | STM0303 | STY0338  | ATGTCTT, TTAGTCA/ATGTCTT, | 1 |
| 825 | CHIP2754 | STM/STY    | STM1547 | STY1514  | ATGTCAG TTATTCC(ATGTCAG   | 1 |
| 826 | CHIP2778 | STM/STY    | STM1586 | STY1479  | ATGCACT TTACAGA/ATGCACT   | 1 |
| 827 | CHIP2802 | STM specil | STM1625 |          | ATGGAAA TTACAGC ATGGAAA   | 1 |
| 828 | CHIP2826 | STM/STY    | STM1661 | STY1403  | ATGGCTA TTAATCG ATGGCTA   | 1 |
| 829 | CHIP2820 | STM/STY    | STM1650 |          | ATGCCGC TTATCCT GTGCCGC   | 1 |
| 830 | CHIP2844 | STM/STY    | STM1698 | STY1353  | ATGCCGT TTATTTTT ATGCCGT  | 1 |
| 831 | CHIP4405 | STM/STY    | STM0509 | STY0556  | ATGACAA TTAGAAA ATGACAA   | 1 |
| 832 | CHIP1169 | STM/STY    | STM1001 | STY1005  | ATGAAGC TTAAGC/ATGAAGC    | 1 |
| 833 | CHIP1185 | STM/STY    | STM0956 | STY0954  | ATGCGCC TTACAGA/ATGCGCC   | 1 |
| 834 | CHIP4469 | STM/STY    | STM0620 | STY0669  | ATGCGCC TTAGTCG ATGCGCC   | 1 |
| 835 | CHIP4463 | STM/STY    | STM0607 | STY0652  | ATGATTA TTAAGGC ATGATTA/  | 1 |
| 836 | CHIP2855 | STM/STY    | STM1732 | STY1319  | ATGAAAA TTAGAAA(ATGAAAA,  | 1 |
| 837 | CHIP2775 | STM/STY    | STM1573 | STY1491a | ATGCTGG TTAATGC(ATGCTGG   | 1 |
| 838 | CHIP2799 | STM/STY    | STM1621 | STY1443  | ATGAAAA TTATTGC ATGAAAA,  | 1 |
| 839 | CHIP2823 | STM/STY    | STM1655 | STY1410  | ATGACCA TTATTTA GTGACCA   | 1 |
| 840 | CHIP2839 | STM/STY    | STM1685 | STY1376  | ATGTCAA TTATCGC/ATGTCAA   | 1 |
| 841 | CHIP4194 | STM/STY    | STM2957 | STY3095  | ATGGCGC TTACATG(ATGGCGC   | 1 |
| 842 | CHIP4218 | STM/STY    | STM3006 | STY3149  | ATGTTAT TTACAGC ATGTTAT   | 1 |
| 843 | CHIP4234 | STM/STY    | STM3036 | STY3186  | ATGATAA TTATTCA(ATGATAA   | 1 |
| 844 | CHIP4258 | STM/STY    | STM3099 | STY3252  | ATGAATA TTACAGT(ATGAATA   | 1 |
| 845 | CHIP4370 | STM/STY    | STM0447 | STY0489  | ATGCAAG TTACGCC ATGCAAG   | 1 |
| 846 | CHIP2466 | STM/STY    | STM3583 | STY4228  | ATGTCAA TTATAGC GTGTCAA   | 1 |
| 847 | CHIP2508 | STM/STY    | STM3679 | STY4117  | ATGAACG TTACCGC ATGAACG   | 1 |
| 848 | CHIP2540 | STM/STY    | STM3767 | STY4018  | ATGCAGC TTACACC/ATGCAGC   | 1 |
| 849 | CHIP4293 | STM/STY    | STM3176 | STY3353  | ATGAAAA TTACGGA ATGAAAA,  | 1 |
| 850 | CHIP4221 | STM/STY    | STM3015 | STY3159  | ATGAAAA TTATTCT GTGAAAA   | 1 |
| 851 | CHIP4245 | STM specil | STM3079 |          | ATGATGT TTAAGAG TTGATGT   | 1 |
| 852 | CHIP4269 | STM specil | STM3123 |          | ATGTTGA TTAGCCC ATGTTGA   | 1 |
| 853 | CHIP2487 | STM/STY    | STM3628 | STY4170  | ATGTCAC TTAAGTC ATGTCAC   | 1 |
| 854 | CHIP2503 | STM/STY    | STM3665 | STY4133  | ATGGTTA TTAGCCT ATGGTTA   | 1 |
| 855 | CHIP2519 | STM/STY    | STM3697 | STY4099  | ATGGCTT TTAAGGG ATGGCTT   | 1 |
| 856 | CHIP2535 | STM/STY    | STM3748 | STY4045  | ATGAAAT TTACAGC ATGAAAT   | 1 |
| 857 | CHIP4488 | STM/STY    | STM0358 | STY0389  | ATGATGA TTAGTTT(ATGATGA   | 1 |
| 858 | CHIP1628 | STM/STY    | STM2853 | STY2975  | ATGACTA TTATACC(ATGACTA   | 1 |
| 859 | CHIP2173 | STM/STY    | STM3132 | STY3302  | ATGGGAT TTATTTG(ATGGGAT   | 1 |
| 860 | CHIP1614 | STM/STY    | STM2855 | STY2977  | ATGTGTA TTATGCA(ATGTGTA   | 1 |
| 861 | CHIP1638 | STM/STY    | STM2182 | STY2412  | ATGATGA TTAGCGC ATGATGA   | 1 |
| 862 | CHIP1654 | STM/STY    | STM2084 | STY2293  | ATGTCTT TTAACTA(ATGTCTT   | 1 |
| 863 | CHIP1670 | STM/STY    | STM2121 | STY2334  | ATGCGTT TTAGTCT ATGCGTT   | 1 |
| 864 | CHIP1686 | STM/STY    | STM2248 | STY2474  | ATGAAAC TTATTGC(ATGAAAC   | 0 |
| 865 | CHIP1648 | STM/STY    | STM2218 | STY2454  | ATGCCGC TTATACC(ATGCCGC   | 1 |
| 866 | CHIP1672 | STM/STY    | STM2145 | STY2374  | ATGGAAC TTAAGTC ATGGAAC   | 1 |
| 867 | CHIP1688 | STM/STY    | STM1844 | STY1975  | ATGATGC TTATTTT/ATGATGC   | 1 |
| 868 | CHIP1904 | STM/STY    | STM3418 | STY4380  | ATGGCCC TTATTTT GTGGCCC   | 1 |
| 869 | CHIP2112 | STM/STY    | STM3591 | STY4212  | ATGGCTT TTAAGTC ATGGCTT   | 1 |
| 870 | CHIP2128 | STM/STY    | STM3341 | STY3522  | ATGGATT TTATTTT/ATGGATT   | 1 |
| 871 | CHIP2106 | STM/STY    | STM3612 | STY4191  | ATGTCTA TTACTGC ATGTCTA   | 1 |
| 872 | CHIP2122 | STM/STY    | STM3512 | STY4284  | ATGCCAT TTAAGCC/ATGCCAT   | 1 |
| 873 | CHIP1954 | STM/STY    | STM4404 | STY4762  | ATGTTAG TTAGTAA/ATGTTAG   | 1 |

|     |          |            |         |         |                          |   |
|-----|----------|------------|---------|---------|--------------------------|---|
| 874 | CHIP2162 | STM/STY    | STM3182 | STY3360 | ATGTCTA/TTAGCAA/ATGTCTA/ | 1 |
| 875 | CHIP1611 | STM/STY    | STM2837 | STY2959 | ATGAAAC/TTACTCA/ATGAAAC  | 1 |
| 876 | CHIP4519 | STM/STY    | STM2186 | STY2416 | ATGCCGC/TTAACAT/ATGCCGC  | 1 |
| 877 | CHIP2237 | STM/STY    | STM3162 | STY3334 | ATGGCTG/TTAGGCG/ATGGCTG  | 1 |
| 878 | CHIP0370 | STM/STY    | STM1408 | STY1712 | ATGAGCG/TTATGCC/ATGAGCG  | 1 |
| 879 | CHIP3337 | STM/STY    | STM0734 | STY0777 | ATGGTGC/TTAATAA/TTGGTGC  | 1 |
| 880 | CHIP3377 | STM/STY    | STM0801 | STY0835 | ATGCGCA/TTAACCC/ATGCGCA  | 1 |
| 881 | CHIP3417 | STM specil | STM0858 |         | ATGGGAG/TTACATC/ATGGGAG  | 1 |
| 882 | CHIP0315 | STM/STY    | STM1175 | STY1214 | ATGGCGC/TTACTGG/GTGGCGC  | 1 |
| 883 | CHIP3372 | STM/STY    | STM0793 | STY0826 | ATGACAA/TTAATGG/ATGACAA  | 1 |
| 884 | CHIP3404 | STM specil | STM0839 |         | ATGTTGC/TTAATGA/TTGTTGC  | 1 |
| 885 | CHIP2193 | STM/STY    | STM3332 | STY3512 | ATGACGA/TTAGTTT/ATGACGA  | 1 |
| 886 | CHIP0326 | STM/STY    | STM3756 | STY4032 | ATGATGA/TTATAAA/ATGATGA  | 1 |
| 887 | CHIP2233 | STM/STY    | STM3188 | STY3366 | ATGGAAA/TTATCCT/ATGGAAA  | 1 |
| 888 | CHIP0366 | STM/STY    | STM1404 | STY1716 | ATGAAAA/TTATGGT/ATGAAAA  | 1 |
| 889 | CHIP3399 | STM/STY    | STM0833 | STY0872 | ATGAAAA/TTAGAAG/ATGAAAA  | 1 |
| 890 | CHIP3632 | STM/STY    | STM4384 | STY4740 | ATGACCG/TTACTTC/ATGACCG  | 1 |
| 891 | CHIP3656 | STM specil | STM4430 |         | ATGTCAA/TTAACGC/ATGTCAA  | 1 |
| 892 | CHIP4346 | STM/STY    | STM0394 | STY0428 | ATGAAAA/TTATCCG/ATGAAAA  | 1 |
| 893 | CHIP3704 | STM/STY    | STM4525 |         | ATGAACA/TTATGCC/ATGAACA  | 1 |
| 894 | CHIP4372 | STM/STY    | STM0453 | STY0495 | ATGAAAC/TTACAAT/ATGAAAC  | 1 |
| 895 | CHIP4428 | STM/STY    | STM0551 | STY0599 | ATGGTGC/TTAATAT/TTGGTGC  | 1 |
| 896 | CHIP4429 | STM/STY    | STM0554 | STY0602 | ATGGTTC/TTAAGCC/ATGGTTC  | 0 |
| 897 | CHIP4438 | STM/STY    | STM0298 | STY0329 | ATGCTGC/TTATTGG/ATGCTGC  | 1 |
| 898 | CHIP4478 | STM/STY    | STM0342 | STY0375 | ATGTATT/TTATACC/ATGTATT/ | 1 |
| 899 | CHIP4480 | STM/STY    | STM0344 | STY0377 | ATGAGTC/TTAATAA/ATGAGTC  | 1 |
| 900 | CHIP1745 | STM/STY    | STM2967 | STY3106 | ATGGACC/TTACAGA/GTGGACC  | 1 |
| 901 | CHIP4664 | STM/STY    | STM4316 | STY4516 | ATGAATG/TTAAGTA/TTGAATG  | 1 |
| 902 | CHIP4603 | STM/STY    | STM4071 | STY3799 | ATGGGCC/TTACCAG/ATGGGCC  | 1 |
| 903 | CHIP4644 | STM/STY    | STM3783 | STY3999 | ATGAGTA/TTAGGCT/ATGAGTA  | 1 |
| 904 | CHIP2169 | STM/STY    | STM3143 | STY3314 | ATGTGTA/TTACGCG/ATGTGTA  | 1 |
| 905 | CHIP1140 | STM/STY    | STM1535 | STY1528 | ATGTGTA/TTATTTT/ATGTGTA  | 1 |
| 906 | CHIP1156 | STM/STY    | STM1520 | STY1540 | ATGAAAA/TTACGGC/TTGAAAA  | 1 |
| 907 | CHIP2555 | STM/STY    | STM3805 | STY3974 | ATGAAGA/TTATCCG/ATGAAGA  | 1 |
| 908 | CHIP2532 | STM/STY    | STM3744 | STY4048 | ATGTCAG/TTAGGCG/ATGTCAG  | 1 |
| 909 | CHIP2485 | STM/STY    | STM3623 | STY4177 | ATGATGA/TTATTTT/ATGATGA  | 1 |
| 910 | CHIP1324 | STM/STY    | STM3795 | STY3987 | ATGCAGA/TTACTCA/ATGCAGA  | 1 |
| 911 | CHIP2428 | STM specil | STM3516 |         | ATGGGGC/TTAAAT/ATGGGGC   | 1 |
| 912 | CHIP3941 | STM/STY    | STM1366 | STY1757 | ATGATCT/TTACACA/TTGATCT/ | 1 |
| 913 | CHIP0084 | STM/STY    | STM4133 |         | ATGCTTG/TTAGCCT/AGGCTTG  | 1 |
| 914 | CHIP4642 | STM specil | STM1865 |         | ATGACGC/TTACCCT/CTGACGC  | 1 |
| 915 | CHIP4666 | STM/STY    | STM4478 |         | ATGGATT/TTATACT/ATGGATT  | 1 |
| 916 | CHIP4604 | STM/STY    | STM4000 |         | ATGTTCT/TTAGCCA/ATGTTCT/ | 1 |
| 917 | CHIP4661 | STM/STY    | STM4140 |         | ATGTCGT/TTAAGTT/TATTCGT/ | 1 |
| 918 | CHIP4654 | STM/STY    | STM3911 | STY3643 | ATGCCCG/TTAGCAG/CTGCCCG  | 1 |
| 919 | CHIP3272 | STM/STY    | STM3387 |         | ATGATAC/TTACTCC/ATGATAC/ | 1 |
| 920 | CHIP3237 | STM/STY    | STM3308 | STY3487 | ATGGAAA/TTAAAT/ATGGAAA   | 1 |
| 921 | CHIP2947 | STM/STY    | STM1939 | STY2147 | ATGGTAA/TTATACC/GTGGTAA  | 1 |
| 922 | CHIP0824 | STM specil | PSLT054 |         | ATGTTCC/TTAAGTC/ATGTTCC  | 1 |
| 923 | CHIP1011 | STM specil | PSLT055 |         | ATGTTAC/TTAGTCT/ATGTTAC  | 1 |
| 924 | CHIP0657 | STM specil | PSLT040 |         | ATGAATA/TTAAACT/ATGAATA  | 1 |
| 925 | CHIP1078 | STM specil | PSLT064 |         | ATGTGAA/TTACGGC/TGAATCT/ | 1 |

|     |          |              |         |         |         |         |         |   |
|-----|----------|--------------|---------|---------|---------|---------|---------|---|
| 926 | CHIP0952 | STM specil   | PSLT051 |         | ATGAAAA | TTAGTGG | ATGAAAA | 1 |
| 927 | CHIP1058 | STM specil   | PSLT024 |         | ATGACCC | TTATCCA | ATCACCC | 0 |
| 928 | CHIP1076 | STM specil   | PSLT062 |         | ATGCAGT | TTAGTCG | ATGCAGT | 1 |
| 929 | CHIP1051 | STM specil   | PSLT004 |         | ATGTCTA | TTATACT | GTGTCTA | 1 |
| 930 | CHIP0943 | none         | R460026 |         | ATGAAGC | TTAGAAT | ATGAAGC | 0 |
| 931 | CHIP4779 | STM/STY      |         |         | GTGAGCC | TAAACCA | GTGAGCC | 0 |
| 932 | CHIP4783 | STM/STY      |         |         | TCGATTT | ACGGGAT | TCGATTT | 0 |
| 933 | CHIP4787 | STM/STY      |         |         | GGAATCG | ACTTTTT | GGAATCG | 0 |
| 934 | CHIP4791 | STM/STY      |         |         | CAGCTAG | GCGAGCT | CAGCTAG | 0 |
| 935 | CHIP4795 | STM/STY      | STM2479 | STY2717 | TATGGCC | ACAGTTG | TATGGCC | 1 |
| 936 | CHIP4799 | STM specil   | STM2509 |         | TGGTCGT | CCATTCA | TGGTCGT | 1 |
| 937 | CHIP4917 | STY specific |         | STY0205 | ATGCTCG | TTATTCC | ATGCTCG | 0 |
| 938 | CHIP4933 | STY specific |         | STY0326 | ATGAATA | TTATCCC | ATGAATA | 0 |
| 939 | CHIP4949 | STM/STY      |         |         | ATGGCGA | TTAGGCC | ATGGCGA | 0 |
| 940 | CHIP4965 | STY specific |         | STY1030 | ATGGTAT | TTAGACC | ATGGTAT | 0 |
| 941 | CHIP4981 | STY specific |         | STY1052 | ATGATTA | TTAGATA | ATGATTA | 0 |
| 942 | CHIP5088 | STY specific |         | STY2027 | ATGGAAT | TTATTCC | ATGGAAT | 0 |
| 943 | CHIP4943 | STM/STY      |         | STY0405 | ATGCACT | TTACCAG | ATGCACT | 0 |
| 944 | CHIP4959 | STY specific |         | STY1019 | ATGACTA | TTAATGG | ATGACTA | 0 |
| 945 | CHIP4975 | STY specific |         | STY1046 | ATGGCAA | TTAAGCG | ATGGCAA | 0 |
| 946 | CHIP5083 | STY specific |         | STY2021 | ATGAGTT | TTAGAAG | ATGAGTT | 0 |
| 947 | CHIP5191 | STY specific |         | STY3087 | ATGAACA | TTACTTA | ATGAACA | 0 |
| 948 | CHIP5205 | STY specific |         | STY3285 | ATGGCTA | TTATGGT | ATGGCTA | 0 |
| 949 | CHIP4953 | STY specific |         | STY0947 | ATGTATC | TTACAGT | ATGTATC | 0 |
| 950 | CHIP4969 | STY specific |         | STY1040 | ATGTCCG | TTATTTG | ATGTCCG | 0 |
| 951 | CHIP4984 | STY specific |         | STY1056 | ATGCCGA | TTATTGC | ATGCCGA | 0 |
| 952 | CHIP5092 | STY specific |         | STY2031 | ATGCCGA | TTATTGC | ATGCCGA | 0 |
| 953 | CHIP5201 | STY specific |         | STY3193 | ATGCTCA | TTAAATG | ATGCTCA | 0 |
| 954 | CHIP5213 | STY specific |         | STY3347 | ATGCTGG | TTATTTT | ATGCTGG | 0 |
| 955 | CHIP4971 | STM/STY      |         |         | ATGAATC | TTATACC | ATGAATC | 0 |
| 956 | CHIP4986 | STY specific |         | STY1058 | ATGGCAC | TTAGCGA | ATGGCAC | 0 |
| 957 | CHIP5002 | STY specific |         | STY1076 | ATGTTCT | TTATGGG | ATGTTCT | 0 |
| 958 | CHIP5109 | STY specific |         | STY2050 | ATGATTT | TTAACAA | GTGATTT | 0 |
| 959 | CHIP5215 | STM/STY      | STM0055 | STY3532 | ATGACTA | TTACGCC | ATGACTA | 0 |
| 960 | CHIP5231 | STY specific |         | STY3667 | ATGAGCA | TTATGCA | ATGAGCA | 0 |
| 961 | CHIP5432 | STM/STY      |         | STY4854 | ATGAGCG | TTATAAA | ATGAGCG | 0 |
| 962 | CHIP5290 | STM/STY      |         |         | ATGCCGC | TTAGGCA | ATGCCGC | 0 |
| 963 | CHIP5306 | STY specific |         | STY4534 | ATGTCTA | TTAGAAC | ATGTCTA | 0 |
| 964 | CHIP5402 | STY specific |         | STY4677 | ATGGCCT | TTATCCA | TTGGCCT | 0 |
| 965 | CHIP5418 | STY specific |         | STY4830 | ATGAGAC | TTATACG | ATGAGAC | 0 |
| 966 | CHIP5433 | STM/STY      |         |         | ATGAAAT | TTATGAT | GTGAAAT | 0 |
| 967 | CHIP5339 | STY specific |         | STY4578 | ATGACAC | TTACCTC | ATGACAC | 0 |
| 968 | CHIP5355 | STY specific |         | STY4595 | ATGTTTC | TTAACAC | ATGTTTC | 0 |
| 969 | CHIP5376 | STY specific |         | STY4636 | ATGAGCA | TTACTGC | ATGAGCA | 0 |
| 970 | CHIP5388 | STY specific |         | STY2419 | ATGGACC | TTATTGA | ATGGACC | 0 |
| 971 | CHIP5399 | STY specific |         | STY4674 | ATGGGCC | TTAGAAG | TTGGGCC | 0 |
| 972 | CHIP5340 | STY specific |         | STY4579 | ATGACGA | TTATTTA | ATGACGA | 0 |
| 973 | CHIP2568 | STM/STY      | STM3821 | STY3957 | ATGATTA | TTATTCA | ATGATTA | 1 |
| 974 | CHIP2584 | STM/STY      | STM3843 | STY3937 | ATGAGCC | TTACTTA | ATGAGCC | 1 |
| 975 | CHIP2600 | STM/STY      | STM3871 | STY3907 | ATGGCTT | TTAATGC | ATGGCTT | 1 |
| 976 | CHIP0841 | STM/STY      | STM3715 | STY4080 | ATGGGCA | TTAGACA | ATGGGCA | 1 |
| 977 | CHIP3240 | STM/STY      | STM3313 | STY3492 | ATGGGTC | TTAACTC | ATGGGTC | 1 |

|      |          |            |         |         |                          |   |
|------|----------|------------|---------|---------|--------------------------|---|
| 978  | CHIP3256 | STM/STY    | STM3350 |         | ATGATTC TTAGTCA GTGATTC  | 1 |
| 979  | CHIP3250 | STM/STY    | STM3342 | STY3523 | ATGGCTG TTAACCC ATGGCTG  | 1 |
| 980  | CHIP3266 | STM/STY    | STM3374 | STY3554 | ATGTTGA TTA CTCT ATGTTGA | 1 |
| 981  | CHIP3282 | STM/STY    | STM0637 | STY0688 | ATGAAGA TTATCCA ATGAAGA  | 1 |
| 982  | CHIP3298 | STM specil | STM0659 |         | ATGGATA TTACGGC ATGGATA  | 1 |
| 983  | CHIP3314 | STM/STY    | STM0693 | STY0731 | ATGACTG TTATTTA ATGACTG  | 1 |
| 984  | CHIP2571 | STM/STY    | STM3824 | STY3954 | ATGTCAC TTAATAC ATGTCAC  | 1 |
| 985  | CHIP2748 | STM/STY    | STM1537 | STY1526 | ATGCATC TTACCTG ATGCATC  | 1 |
| 986  | CHIP2573 | STM specil | STM3828 |         | ATGCAGT TTACCAC ATGCAGT  | 0 |
| 987  | CHIP2589 | STM/STY    | STM3848 | STY3935 | ATGAAGA TTAGATA ATGAAGA  | 1 |
| 988  | CHIP2605 | STM/STY    | STM3880 | STY3898 | ATGAGCA TTAATC ATGAGCA   | 1 |
| 989  | CHIP0838 | STM/STY    | STM1332 | STY1779 | ATGCTTA TTATTTA ATGCTTA  | 1 |
| 990  | CHIP0862 | STM/STY    | STM0776 | STY0809 | ATGAGAG TTAATCT ATGAGAG  | 1 |
| 991  | CHIP0808 | STM/STY    | STM2030 | STY2235 | ATGAAAG TTAATG ATGAAAG   | 1 |
| 992  | CHIP0840 | STM/STY    | STM3714 | STY4081 | ATGATTA TTA CTTA ATGATTA | 1 |
| 993  | CHIP2647 | STM/STY    | STM0084 | STY0098 | ATGAAAA TTAATCT ATGAAAA  | 1 |
| 994  | CHIP2671 | STM/STY    | STM0138 | STY0160 | ATGTCTG TTAGCGC ATGTCTG  | 1 |
| 995  | CHIP2687 | STM/STY    | STM0171 | STY0193 | ATGAAAG TTATTGG ATGAAAG  | 1 |
| 996  | CHIP2711 | STM/STY    | STM0211 | STY0233 | ATGTATG TTA CTTA ATGTATG | 1 |
| 997  | CHIP2385 | STM/STY    | STM3405 | STY4392 | ATGGCCC TTAACA ATGGCCC   | 1 |
| 998  | CHIP2401 | STM/STY    | STM3461 | STY4337 | ATGTCGA TTAGCGG ATGTCGA  | 1 |
| 999  | CHIP3865 | STM/STY    | STM1211 | STY1251 | ATGACTA TTAATGC TTGACTA  | 1 |
| 1000 | CHIP3881 | STM/STY    | STM1253 | STY1868 | ATGGCAC TTATGAT ATGGCAC  | 1 |
| 1001 | CHIP3897 | STM/STY    | STM1286 | STY1830 | ATGACCA TTAGAAT GTGACCA  | 1 |
| 1002 | CHIP4010 | STM/STY    | STM2116 | STY2329 | ATGGGCC TTATTTG GTGGGCC  | 1 |
| 1003 | CHIP3867 | STM/STY    | STM1214 | STY1254 | ATGAAAA TTA CTTA ATGAAAA | 1 |
| 1004 | CHIP3883 | STM/STY    | STM1261 | STY1859 | ATGCAAC TTACGCG ATGCAAC  | 1 |
| 1005 | CHIP3899 | STM/STY    | STM1288 | STY1828 | ATGAAAA TTACACC GTGAAAA  | 1 |
| 1006 | CHIP4012 | STM/STY    | STM2119 | STY2332 | ATGGAAT TTACATC ATGGAAT  | 1 |
| 1007 | CHIP3740 | STM/STY    | STM4600 | STY4949 | ATGCGTG TTATTTT ATGCGTG  | 1 |
| 1008 | CHIP4060 | STM specil | STM2753 |         | ATGAACA TTAACA ATGAACA   | 1 |
| 1009 | CHIP4006 | STM/STY    | STM2109 | STY2321 | ATGTCAA TTAGGAC ATGTCAA  | 1 |
| 1010 | CHIP4022 | STM/STY    | STM2136 | STY2365 | ATGATGT TTA CTTA ATGATGT | 1 |
| 1011 | CHIP3750 | STM specil | STM0275 |         | ATGAGCC TTAATTA GTGAGCC  | 1 |
| 1012 | CHIP3766 | STM/STY    | STM0297 | STY0343 | ATGCGTA TTAGCTT ATGCGTA  | 1 |
| 1013 | CHIP3782 | STM specil | STM0329 |         | ATGTCTG TTATTCC ATGTCTG  | 1 |
| 1014 | CHIP3798 | STM/STY    | STM1061 | STY1082 | ATGAATT TTAGGCG ATGAATT  | 1 |
| 1015 | CHIP4144 | STM/STY    | STM4126 | STY3748 | ATGCCAC TTA AAC ATGCCAC  | 1 |
| 1016 | CHIP4168 | STM/STY    | STM2915 | STY3040 | ATGCCGC TTAGCGC ATGCCGC  | 1 |
| 1017 | CHIP3048 | STM/STY    | STM2386 | STY2618 | ATGAAAA TTAGGGT ATGAAAA  | 1 |
| 1018 | CHIP3064 | STM/STY    | STM2424 | STY2660 | ATGAACT TTATAGC ATGAACT  | 1 |
| 1019 | CHIP3464 | STM specil | STM0921 |         | ATGCGGC TTAGGAA ATGCGGC  | 1 |
| 1020 | CHIP3104 | STM/STY    | STM2526 | STY2771 | ATGGCTA TTAACGG ATGGCTA  | 1 |
| 1021 | CHIP3458 | STM specil | STM0915 |         | ATGAACA TTAGTTG ATGAACA  | 1 |
| 1022 | CHIP3098 | STM/STY    | STM2510 | STY2751 | ATGACGC TTATTCC ATGACGC  | 1 |
| 1023 | CHIP3114 | STM/STY    | STM2544 | STY2790 | ATGAGAC TTAAGCG ATGAGAC  | 1 |
| 1024 | CHIP3130 | STM specil | STM2586 |         | ATGACGT TTATAAAC ATGACGT | 0 |
| 1025 | CHIP4107 | STM/STY    | STM4059 | STY3812 | ATGAATA TTATGAA ATGAATA  | 1 |
| 1026 | CHIP3555 | STM specil | STM4213 |         | ATGGCAG TTAGCGA ATGGCAG  | 1 |
| 1027 | CHIP4165 | STM/STY    | STM2911 | STY3036 | ATGACGT TTATGAT ATGACGT  | 1 |
| 1028 | CHIP4189 | STM specil | STM2944 |         | ATGTCGA TTATTCC GTGTCGA  | 1 |
| 1029 | CHIP3069 | STM/STY    | STM2441 | STY2678 | ATGAGCA TTAGGCC ATGAGCA  | 1 |

|      |          |            |         |         |                          |   |
|------|----------|------------|---------|---------|--------------------------|---|
| 1030 | CHIP3085 | STM/STY    | STM2486 | STY2724 | ATGATTA TTAAAAG GTGATTA  | 1 |
| 1031 | CHIP3493 | STM/STY    | STM0972 | STY0971 | ATGCCAG TTATATA ATGCCAG  | 1 |
| 1032 | CHIP3509 | STM/STY    | STM1003 | STY1009 | ATGTTAG TTA CTCC ATGTTAG | 1 |
| 1033 | CHIP3503 | STM/STY    | STM0991 | STY0993 | ATGCAGG TTA CTCA ATGCAGG | 1 |
| 1034 | CHIP2952 | STM/STY    | STM1953 | STY2161 | ATGCCAC TTATACA ATGCCAC  | 1 |
| 1035 | CHIP2976 | STM/STY    | STM2075 | STY2284 | ATGATGA TTACATC GTGATGA  | 1 |
| 1036 | CHIP3016 | STM/STY    | STM2333 | STY2563 | ATGAACG TTA AAC GTGAACC  | 1 |
| 1037 | CHIP0193 | STM/STY    | STM2054 | STY2259 | ATGTCTC TTACCCC ATGTCTC  | 1 |
| 1038 | CHIP2292 | STM/STY    | STM1270 | STY1851 | ATGCATT TTAAGAC GTGCATT  | 1 |
| 1039 | CHIP2278 | STM/STY    | STM1132 | STY1169 | ATGATAG TTA AAT GTGATAG  | 1 |
| 1040 | CHIP2302 | STM/STY    | STM1327 | STY1784 | ATGAAGC TTACATC ATGAAGC  | 1 |
| 1041 | CHIP0251 | STM/STY    | STM0371 | STY0403 | ATGTCTT TTA TCT ATGTCTT  | 1 |
| 1042 | CHIP2350 | STM/STY    | STM1318 | STY1793 | ATGTCGC TTATGCA ATGTCGC  | 1 |
| 1043 | CHIP3619 | STM/STY    | STM4355 | STY4712 | ATGTCAA TTAGGCA ATGTCAA  | 1 |
| 1044 | CHIP2963 | STM/STY    |         |         | ATGAACA TTAGAAC ATGAACA  | 0 |
| 1045 | CHIP2360 | STM/STY    | STM1390 | STY1730 | ATGTCGT TTATAGT ATGTCGT  | 1 |
| 1046 | CHIP3629 | STM/STY    | STM4378 | STY4734 | ATGGAGC TTAGGCA ATGGAGC  | 1 |
| 1047 | CHIP3645 | STM specil | STM4418 |         | ATGTCCA TTAATCA ATGTCCA  | 1 |
| 1048 | CHIP2989 | STM/STY    | STM2276 | STY2505 | ATGAACA TTAGGCT ATGAACA  | 1 |
| 1049 | CHIP3685 | STM specil | STM4494 |         | ATGAAAA TTAACGC ATGAAAA  | 1 |
| 1050 | CHIP3701 | STM/STY    | STM4519 | STY4876 | ATGGCTT TTAGCGG ATGGCTT  | 1 |
| 1051 | CHIP2999 | STM/STY    | STM2298 | STY2528 | ATGTTTG TTATTGG ATGTTTG  | 1 |
| 1052 | CHIP3015 | STM/STY    | STM2332 | STY2562 | ATGAAGC TTA AAGC ATGAAGC | 1 |
| 1053 | CHIP3711 | STM specil | STM4537 |         | ATGGTAG TTAGAAA ATGGTAG  | 1 |
| 1054 | CHIP2291 | STM/STY    | STM1269 | STY1852 | ATGATTC TTAACGC ATGATTC  | 1 |
| 1055 | CHIP0232 | STM specil | STM0200 |         | ATGGCTA TTA AATG ATGGCTA | 1 |
| 1056 | CHIP0248 | STM/STY    | STM0368 | STY0400 | ATGTCTT TTACGAT ATGTCTT  | 1 |
| 1057 | CHIP1437 | STM/STY    | STM2649 | STY2842 | ATGAACA TTACAGC ATGAACA  | 1 |
| 1058 | CHIP1453 | STM/STY    | STM0390 | STY0423 | ATGAGTG TTAGACA ATGAGTG  | 1 |
| 1059 | CHIP1477 | STM/STY    | STM4236 | STY4432 | ATGGCCA TTATCGA ATGGCCA  | 1 |
| 1060 | CHIP1501 | STM/STY    | STM2347 | STY2577 | ATGAAAC TTACGAG ATGAAAC  | 1 |
| 1061 | CHIP0491 | STM/STY    | STM2297 | STY2527 | ATGGCTG TTATTGT ATGGCTG  | 1 |
| 1062 | CHIP0515 | STM/STY    | STM4226 | STY4422 | ATGATGC TTATTCT ATGATGC  | 1 |
| 1063 | CHIP3948 | STM/STY    | STM1375 | STY1748 | ATGAAAC TTA CTGC ATGAAAC | 1 |
| 1064 | CHIP0541 | STM/STY    | STM1582 | STY1483 | ATGACCT TTA TTTT ATGACCT | 1 |
| 1065 | CHIP0557 | STM/STY    | STM2265 | STY2491 | ATGAAAA TTA CTCC ATGAAAA | 1 |
| 1066 | CHIP1320 | STM/STY    | STM3785 | STY3997 | ATGAAAA TTAGGCA ATGAAAA  | 1 |
| 1067 | CHIP1432 | STM/STY    | STM2577 | STY2823 | ATGGCGA TTA ACTT ATGGCGA | 1 |
| 1068 | CHIP1360 | STM/STY    | STM0165 | STY0187 | ATGAAAA TTAGACC TTGAAAA  | 1 |
| 1069 | CHIP1370 | STM/STY    | STM2061 | STY2266 | ATGGATT TTA CTTC ATGGATT | 1 |
| 1070 | CHIP1394 | STM/STY    | STM0146 | STY0168 | ATGTTGC TTATGTC ATGTTGC  | 1 |
| 1071 | CHIP1410 | STM/STY    | STM0156 | STY0179 | ATGAAAA TTATTCG ATGAAAA  | 1 |
| 1072 | CHIP3919 | STM/STY    | STM1333 | STY1778 | ATGCCTG TTATTCC ATGCCTG  | 1 |
| 1073 | CHIP0528 | STM/STY    | STM0425 | STY0464 | ATGAAGT TTACGGA ATGAAGT  | 1 |
| 1074 | CHIP3975 | STM/STY    | STM1477 | STY1645 | ATGGAAA TTA ACCC ATGGAAA | 1 |
| 1075 | CHIP1018 | STM/STY    | STM0495 | STY0541 | ATGACAC TTAATCC ATGACAC  | 1 |
| 1076 | CHIP1581 | STM/STY    | STM0496 | STY0542 | ATGGAGC TTA TTTC ATGGAGC | 1 |
| 1077 | CHIP1597 | STM/STY    | STM0594 | STY0638 | ATGAGAC TTA AAC GTGAGAC  | 1 |
| 1078 | CHIP2005 | STM/STY    | STM4475 | STY4814 | ATGGAAA TTACAGC ATGGAAA  | 1 |
| 1079 | CHIP2029 | STM/STY    | STM4598 | STY4947 | ATGCAGA TTAATCC ATGCAGA  | 1 |
| 1080 | CHIP3193 | STM/STY    | STM3216 | STY3394 | ATGTTTT TTAAGCG ATGTTTT  | 1 |
| 1081 | CHIP2079 | STM/STY    | STM3743 | STY4049 | ATGAATC TTA CCT ATGAATC  | 1 |

|      |          |            |         |         |                            |   |
|------|----------|------------|---------|---------|----------------------------|---|
| 1082 | CHIP0973 | STM/STY    | STM1260 | STY1860 | ATGGAGT T TACTGC.ATGGAGT   | 1 |
| 1083 | CHIP1544 | STM/STY    | STM2421 | STY2657 | ATGGGTA TTAATGT(ATGGGTA    | 1 |
| 1084 | CHIP1600 | STM/STY    | STM2773 | STY2890 | ATGCGTA TTAGCCG ATGCGTA    | 1 |
| 1085 | CHIP3148 | STM specil | STM2604 |         | ATGTCAT T TACGGT ATGTCAT   | 1 |
| 1086 | CHIP3164 | STM/STY    | STM1019 | STY1032 | ATGAGAA TTAATAA/ATGAGAA    | 0 |
| 1087 | CHIP3150 | STM specil | STM2606 |         | ATGAAGC T TACGTT(GTGAAGC   | 1 |
| 1088 | CHIP3166 | STM/STY    | STM2642 | STY2835 | ATGTCTC. T TACATA/ATGTCTC. | 1 |
| 1089 | CHIP3182 | STM/STY    | STM3192 | STY3370 | ATGCGTG T TATTTA/ATGCGTG   | 1 |
| 1090 | CHIP2058 | STM/STY    | STM3587 | STY4223 | ATGGACA T TATTGC(ATGGACA   | 1 |
| 1091 | CHIP2074 | STM/STY    | STM3490 | STY4306 | ATGAACG T TAGCCT GTGAACG   | 1 |
| 1092 | CHIP0976 | STM/STY    | STM2453 | STY2690 | ATGGACC T TAGCGG ATGGACC   | 1 |
| 1093 | CHIP0634 | STM/STY    | STM2887 | STY3010 | ATGTCCT T TAAATGC(ATGTCCT  | 1 |
| 1094 | CHIP0746 | STM/STY    | STM2465 |         | ATGGAAG T TAAATG ATGGAAG   | 1 |
| 1095 | CHIP1813 | STM/STY    | STM4056 | STY3815 | ATGCATT T TATTTT(ATGCATT,  | 1 |
| 1096 | CHIP1845 | STM/STY    | STM0661 | STY0706 | ATGGCAC T TATGCG ATGGCAC   | 1 |
| 1097 | CHIP1877 | STM/STY    | STM0708 | STY0748 | ATGGAAC T TAAATA/ATGGAAC   | 1 |
| 1098 | CHIP0683 | STM/STY    | STM2900 | STY3023 | ATGAAAA T TATAAG(ATGAAAA,  | 1 |
| 1099 | CHIP0765 | STM/STY    | STM0552 | STY0600 | ATGCTGC T TACTTA(ATGCTGC   | 1 |
| 1100 | CHIP1832 | STM/STY    | STM0784 | STY0817 | ATGCCGA T TATAGC.ATGCCGA   | 1 |
| 1101 | CHIP1864 | STM/STY    | STM0771 | STY0803 | ATGCGCC T TAAACA(ATGCGCC   | 1 |
| 1102 | CHIP0678 | STM/STY    | STM1070 | STY1091 | ATGAAAA T TAAAGCC ATGAAAA, | 1 |
| 1103 | CHIP0710 | STM/STY    | STM1177 | STY1216 | ATGTCTT T TAGCGC ATGTCTT   | 1 |
| 1104 | CHIP0734 | STM/STY    | STM1776 | STY1901 | ATGAAGC T TATTCC ATGAAGC   | 1 |
| 1105 | CHIP0113 | STM/STY    | STM1928 | STY2137 | ATGAGTC T TAGGCC ATGAGTC   | 1 |
| 1106 | CHIP4712 | STM/STY    | STM1999 | STY2207 | ATGGGCC T TATGGG ATGGGCC   | 1 |
| 1107 | CHIP0153 | STM/STY    | STM3869 | STY3909 | ATGAATC T TACAGT GTGAATC   | 1 |
| 1108 | CHIP0385 | STM/STY    | STM1435 | STY1687 | ATGCGTT T TAGTTG(ATGCGTT   | 1 |
| 1109 | CHIP1236 | STM/STY    | STM1952 | STY2160 | ATGCAAG T TATTTT(ATGCAAG   | 1 |
| 1110 | CHIP1252 | STM/STY    | STM1675 | STY1389 | ATGACGC T TAGGCG ATGACGC   | 1 |
| 1111 | CHIP0459 | STM/STY    | STM2638 | STY2831 | ATGAAGC T TATTGT/ATGAAGC   | 1 |
| 1112 | CHIP0475 | STM/STY    | STM0730 | STY0773 | ATGGCTG T TAAACGC ATGGCTG  | 1 |
| 1113 | CHIP0108 | STM/STY    | STM1230 | STY1270 | ATGAATA T TATTCC ATGAATA/  | 1 |
| 1114 | CHIP0132 | STM/STY    | STM4175 | STY3710 | ATGAAAG T TAGTTT/ATGAAAG   | 1 |
| 1115 | CHIP0164 | STM/STY    | STM3286 | STY3467 | ATGACAG T TAAAGCG ATGACAG  | 1 |
| 1116 | CHIP0180 | STM/STY    | STM2041 | STY2246 | ATGGAAA T TAAAGC(ATGGAAA   | 1 |
| 1117 | CHIP3669 | STM/STY    | STM4453 | STY4793 | ATGATGA T TATTAG(ATGACTA   | 1 |
| 1118 | CHIP0390 | STM/STY    | STM1394 | STY1726 | ATGGTAG T TAAACCA ATGGTAG  | 1 |
| 1119 | CHIP0406 | STM/STY    | STM1194 | STY1233 | ATGACGC T TATTGC(ATGACGC   | 1 |
| 1120 | CHIP1257 | STM/STY    | STM1705 | STY1346 | ATGTTTA T TATTTT(ATGTTTA   | 1 |
| 1121 | CHIP1273 | STM/STY    | STM3355 | STY3535 | ATGAGCA T TAGAAA ATGAGCA   | 1 |
| 1122 | CHIP0470 | STM/STY    | STM3721 | STY4073 | ATGGTTG T TACAGA ATGGTTG   | 1 |
| 1123 | CHIP0464 | STM specil | STM1009 |         | ATGAGTG T TATGCC ATGAGTG   | 0 |
| 1124 | CHIP0480 | STM/STY    | STM1143 | STY1180 | ATGAAAA T TAGCGT ATGAAAA,  | 1 |
| 1125 | CHIP0009 | STM/STY    | STM3979 | STY3580 | ATGACAA T TAAATA/ATGACAA   | 1 |
| 1126 | CHIP0702 | STM/STY    | STM2673 | STY2860 | ATGCAAG T TATAAG/CAAGAGC   | 1 |
| 1127 | CHIP0057 | STM/STY    | STM3925 | STY3630 | ATGATTC T TTAGGAG ATGATTC  | 1 |
| 1128 | CHIP0073 | STM/STY    | STM3906 | STY3651 | ATGGGAT T TACAAG GTGGGAT   | 1 |
| 1129 | CHIP0875 | STM/STY    | STM1181 | STY1220 | ATGTTTA T TTAGATG. GTGTTTA | 1 |
| 1130 | CHIP0891 | STM/STY    | STM3477 | STY4319 | ATGGACC T TAAATGA GTGGACC  | 1 |
| 1131 | CHIP0907 | STM/STY    | STM3002 | STY3143 | ATGACCA T TAGGAA ATGACCA   | 1 |
| 1132 | CHIP0923 | STM/STY    | STM3210 | STY3389 | ATGGCTG T TATTTT(ATGGCTG   | 1 |
| 1133 | CHIP0939 | STM/STY    | STM0427 | STY0466 | ATGTCAC T TAGCTC ATGTCAC   | 1 |

|      |          |            |         |         |                          |   |
|------|----------|------------|---------|---------|--------------------------|---|
| 1134 | CHIP1790 | STM/STY    | STM4036 | STY3841 | ATGGCTT TTATTTG(ATGGCTT  | 1 |
| 1135 | CHIP0941 | STM/STY    | STM0828 | STY0866 | ATGATTG TTAGGAG GTGATTG  | 1 |
| 1136 | CHIP0006 | STM/STY    | STM3982 | STY3578 | ATGGAAC TTAACCC(ATGGAAC  | 1 |
| 1137 | CHIP0548 | STM/STY    | STM1914 | STY2123 | ATGATGG TTACATA/TGGCAGA  | 1 |
| 1138 | CHIP1164 | STM/STY    | STM0996 | STY0998 | ATGGGAC TTAGCCG GGACAAA  | 1 |
| 1139 | CHIP2093 | STM/STY    | STM3677 | STY4119 | ATGTGTT TTATTAC TGTTAGA  | 1 |
| 1140 | CHIP2695 | STM/STY    | STM0179 | STY0197 | ATGGCGC TTATTAT(GCGCGTT  | 1 |
| 1141 | CHIP0912 | STM/STY    | STM0608 | STY0653 | ATGTCCT TTAGATT ATGTCCT  | 1 |
| 1142 | CHIP1763 | STM/STY    | STM3011 | STY3155 | ATGGCGA TTAATCG(ATGGCGA  | 1 |
| 1143 | CHIP1787 | STM/STY    | STM4039 | STY3837 | ATGAAAA TTAGAAC ATGAAAA  | 1 |
| 1144 | CHIP1132 | STM/STY    | STM1893 | STY2101 | ATGATTG TTAGCTT(ATGATTG  | 1 |
| 1145 | CHIP1172 | STM/STY    | STM1559 | STY1504 | ATGATCC TTAGTCG ATGATCC  | 1 |
| 1146 | CHIP1188 | STM/STY    | STM1578 | STY1487 | ATGAAAA TTATTCC(ATGAAAA  | 1 |
| 1147 | CHIP1190 | STM/STY    | STM1580 | STY1485 | ATGATAC TTAGCGG ATGATAC  | 1 |
| 1148 | CHIP4474 | STM/STY    | STM0337 | STY0370 | ATGCTTT TTA CTGA ATGCTTT | 1 |
| 1149 | CHIP2858 | STM/STY    | STM1739 | STY1312 | ATGACAA TTACAGC ATGACAA  | 1 |
| 1150 | CHIP2882 | STM/STY    | STM1800 | STY1928 | ATGTCTC TTACAA ATGTCTC   | 1 |
| 1151 | CHIP2906 | STM/STY    | STM1847 | STY1978 | ATGACAG TTATCCT(ATGACAG  | 1 |
| 1152 | CHIP2930 | STM/STY    | STM1891 | STY2099 | ATGATAG TTAATCT(GTGATAG  | 1 |
| 1153 | CHIP2828 | STM/STY    | STM1663 | STY1401 | ATGTTCA TTATTTT(ATGTTCA  | 1 |
| 1154 | CHIP4389 | STM/STY    | STM0479 | STY0523 | ATGGAAC TTAATGC(ATGGAAC  | 1 |
| 1155 | CHIP1145 | STM/STY    | STM0613 | STY0661 | ATGGAAA TTAGTAC ATGGAAA  | 1 |
| 1156 | CHIP4437 | STM specil | STM0571 |         | ATGAATA TTACCAG ATGAATA  | 1 |
| 1157 | CHIP4453 | STM/STY    | STM0591 | STY0635 | ATGATGT TTATTTT GTGATGT  | 1 |
| 1158 | CHIP4477 | STM/STY    | STM0341 | STY0374 | ATGATGG TTAGTAA(ATGATGG  | 1 |
| 1159 | CHIP4471 | STM/STY    | STM0624 | STY0673 | ATGTTTG TTATTTT ATGTTTG  | 1 |
| 1160 | CHIP2759 | STM specil | STM1552 |         | ATGAACC TTAATAA/GTGAACC  | 1 |
| 1161 | CHIP2879 | STM/STY    | STM1793 | STY1921 | ATGTTGG TTAATAA/ATGTTGG  | 1 |
| 1162 | CHIP2807 | STM specil | STM1630 |         | ATGAATG TTAAGC ATGAATG   | 1 |
| 1163 | CHIP2927 | STM/STY    | STM1886 | STY2094 | ATGGCGC TTA CTCA ATGGCGC | 1 |
| 1164 | CHIP2943 | STM specil | STM1933 |         | ATGAAAA TTACCC ATGAAAA   | 1 |
| 1165 | CHIP4290 | STM specil | STM3169 |         | ATGAAAA TTACATA ATGAAAA  | 1 |
| 1166 | CHIP4314 | STM/STY    | STM2692 | STY2878 | ATGAAAA TTACCGC ATGAAAA  | 1 |
| 1167 | CHIP4242 | STM/STY    | STM3069 | STY3227 | ATGTCTG TTA CTTC ATGTCTG | 1 |
| 1168 | CHIP4354 | STM/STY    | STM0410 | STY0448 | ATGACCA TTACGGC ATGACCA  | 1 |
| 1169 | CHIP4282 | STM/STY    | STM3152 | STY3325 | ATGCGTT TTAGAAG ATGCGTT  | 1 |
| 1170 | CHIP4586 | STM/STY    | STM2832 | STY2953 | ATGATCG TTATGAT/ATGATCG  | 1 |
| 1171 | CHIP4628 | STM/STY    | STM0266 | STY0286 | ATGGACA TTA CTCC ATGGACA | 1 |
| 1172 | CHIP4668 | STM/STY    | STM4529 | STY4887 | ATGAGCA TTATTTCT ATGAGCA | 1 |
| 1173 | CHIP4205 | STM/STY    | STM2978 | STY3118 | ATGCTAA TTACGGC ATGCTAA  | 1 |
| 1174 | CHIP4317 | STM specil | STM2697 |         | ATGAGTG TTATGAT ATGAGTG  | 1 |
| 1175 | CHIP4341 | STM/STY    | STM0386 | STY0419 | ATGGAGA TTAGGAT ATGGAGA  | 1 |
| 1176 | CHIP4365 | STM/STY    | STM0439 | STY0481 | ATGATGT TTACCAG ATGATGT  | 1 |
| 1177 | CHIP4607 | STM/STY    | STM3004 | STY3145 | ATGATTG TTAACCT(GTGATTG  | 1 |
| 1178 | CHIP4623 | STM/STY    | STM4445 | STY4784 | ATGGATG TTA AAAA CTGGATG | 1 |
| 1179 | CHIP4639 | STM/STY    | STM1504 | STY1558 | ATGCTAA TTACGTA ATGCTAA  | 1 |
| 1180 | CHIP4655 | STM/STY    | STM3908 | STY3649 | ATGGATT TTAATTC(GTGGATT  | 1 |
| 1181 | CHIP1612 | STM/STY    | STM2838 | STY2960 | ATGAGTG TTAGATA ATGAGTG  | 1 |
| 1182 | CHIP4512 | STM/STY    | STM3540 |         | ATGCGAC TTA AAAA ATGCGAC | 1 |
| 1183 | CHIP4482 | STM/STY    | STM0350 | STY0384 | ATGAGAA TTAACCT GTGAGAA  | 1 |
| 1184 | CHIP1622 | STM/STY    | STM2828 | STY2949 | ATGCGGC TTAATCT(ATGCGGC  | 1 |
| 1185 | CHIP4522 | STM/STY    | STM2191 | STY2425 | ATGATCA TTAGTTA(ATGATCA  | 1 |

|      |          |            |         |         |                            |   |
|------|----------|------------|---------|---------|----------------------------|---|
| 1186 | CHIP4538 | STM/STY    | STM2226 | STY2463 | ATGAGTC TTATTTCC(ATGAGTC   | 1 |
| 1187 | CHIP4554 | STM/STY    | STM2140 | STY2369 | ATGGCTA TTAACGT,ATGGCTA    | 1 |
| 1188 | CHIP4570 | STM/STY    | STM2172 | STY2402 | ATGCAGG TTAGGAA ATGCAGG    | 1 |
| 1189 | CHIP4532 | STM/STY    | STM2204 | STY2439 | ATGAAAA TTATGCC ATGAAAA    | 1 |
| 1190 | CHIP4556 | STM/STY    | STM2142 | STY2371 | ATGAAAA TTATTTTATGAAAA     | 1 |
| 1191 | CHIP4572 | STM/STY    | STM2175 | STY2405 | ATGACTC TTAACGC ATGACTC    | 1 |
| 1192 | CHIP2096 | STM/STY    | STM3671 | STY4127 | ATGAAGC TTAGGCT ATGAAGC    | 1 |
| 1193 | CHIP1928 | STM/STY    | STM0930 | STY0926 | ATGCAGT TTATCGG ATGCAGT    | 1 |
| 1194 | CHIP1944 | STM/STY    | STM4369 | STY4726 | ATGAGCG TTAGGTG ATGAGCG    | 1 |
| 1195 | CHIP1922 | STM/STY    | STM3451 | STY4347 | ATGCGTT TAAAAAC ATGCGTT    | 1 |
| 1196 | CHIP1938 | STM/STY    | STM4362 | STY4719 | ATGTTTG, TTAGATC, TTGTTTG, | 1 |
| 1197 | CHIP2146 | STM/STY    | STM3279 | STY3460 | ATGGCAA TTAAGTGG ATGGCAA   | 1 |
| 1198 | CHIP1978 | STM/STY    | STM4583 | STY4930 | ATGACCC TTAGGCG ATGACCC    | 1 |
| 1199 | CHIP1619 | STM/STY    | STM2820 | STY2946 | ATGTACG TTACAAT, ATGTACG   | 1 |
| 1200 | CHIP1643 | STM/STY    | STM2213 | STY2449 | ATGACGA TTATTTG ATGACGA    | 1 |
| 1201 | CHIP2245 | STM/STY    | STM3112 | STY3267 | ATGATGA TTATCGG ATGATGA    | 1 |
| 1202 | CHIP2261 | STM/STY    | STM3061 | STY3217 | ATGACGC TTACCAC ATGACGC    | 1 |
| 1203 | CHIP3345 | STM/STY    | STM0756 | STY0797 | ATGAGCG TTACGCC ATGAGCG    | 1 |
| 1204 | CHIP3393 | STM/STY    | STM0821 | STYrarB | ATGGCAT TTAACGC ATGGCAT    | 1 |
| 1205 | CHIP2190 | STM/STY    | STM3042 | STY3198 | ATGAAAC TTATAGC GTGAAAC    | 1 |
| 1206 | CHIP2206 | STM/STY    | STM3267 | STY3450 | ATGAAGG TTAAGTAA ATGAAGG   | 1 |
| 1207 | CHIP3380 | STM/STY    | STM0806 | STY0840 | ATGCACG TTACCAA ATGCACG    | 1 |
| 1208 | CHIP3412 | STM/STY    | STM0852 | STY0891 | ATGAGTA TTAACCC ATGAGTA    | 1 |
| 1209 | CHIP0310 | STM/STY    | STM1384 | STY1737 | ATGACGC TTAGCCA ATGACGC    | 1 |
| 1210 | CHIP2217 | STM/STY    | STM3231 | STY3411 | ATGAGCA TTAACCG GTGAGCA    | 1 |
| 1211 | CHIP0350 | STM/STY    | STM2771 |         | ATGGCAC TTAACGT, ATGGCAC   | 0 |
| 1212 | CHIP2257 | STM/STY    | STM3073 | STY3231 | ATGCATC TTAACGT, ATGCATC   | 1 |
| 1213 | CHIP3407 | STM/STY    | STM0843 | STY0882 | ATGACCC TTACAGC ATGACCC    | 1 |
| 1214 | CHIP4337 | STM/STY    | STM0378 | STY0410 | ATGGCTG TTATTGG ATGGCTG    | 1 |
| 1215 | CHIP4369 | STM/STY    | STM0446 | STY0488 | ATGATGA TTACGCG ATGATGA    | 1 |
| 1216 | CHIP3680 | STM specil | STM4489 |         | ATGGATG TTAACCC ATGGATG    | 1 |
| 1217 | CHIP4315 | STM specil | STM2694 |         | ATGATGA TTAGAAA ATGATGA    | 1 |
| 1218 | CHIP3709 | STM specil | STM4535 |         | ATGAAGA TTAAGAAA ATGAAGA   | 1 |
| 1219 | CHIP3608 | STM/STY    | STM4335 | STY4695 | ATGGTGC TTAGCTG ATGGTGC    | 1 |
| 1220 | CHIP3601 | STM specil | STM4320 |         | ATGCAGA TTAGTCA ATGCAGA    | 1 |
| 1221 | CHIP3602 | STM/STY    | STM4324 | STY4683 | ATGCTTG TTAGCGT ATGCTTG    | 1 |
| 1222 | CHIP3611 | STM/STY    | STM4340 | STY4700 | ATGATTA TTAGAGA ATGATTA    | 1 |
| 1223 | CHIP0770 | STM/STY    | STM2899 | STY3022 | ATGTCAT TTATTTG ATGTCAT    | 1 |
| 1224 | CHIP0844 | STM/STY    | STM1779 | STY1905 | ATGATGA TTAGAGT ATGATGA    | 1 |
| 1225 | CHIP4028 | STM/STY    | STM2709 | STY4614 | ATGACGC TTAATGA ATGACGC    | 1 |
| 1226 | CHIP4005 | STM/STY    | STM2107 | STY2319 | ATGTGCA TTATAGG GTGTGCA    | 1 |
| 1227 | CHIP2109 | STM/STY    | STM3605 | STY4198 | ATGCCGC TTAATTC ATGCCGC    | 1 |
| 1228 | CHIP2138 | STM/STY    | STM3303 | STY3482 | ATGGCAC TTAAGTCA ATGGCAC   | 1 |
| 1229 | CHIP2246 | STM/STY    | STM3111 | STY3266 | ATGAGCA TTATTTT ATGAGCA    | 1 |
| 1230 | CHIP2186 | STM/STY    | STM3052 | STY3208 | ATGAAAC TTACCAG ATGAAAC    | 1 |
| 1231 | CHIP1131 | STM/STY    | STM1888 | STY2096 | ATGTCCA TTAAGTCA ATGTCCA   | 1 |
| 1232 | CHIP1203 | STM/STY    | STM1644 | STY1425 | ATGAAAA TTATTTAC ATGAAAA   | 1 |
| 1233 | CHIP1281 | STM/STY    | STM3361 | STY3542 | ATGAAAA TTATTTG ATGAAAA    | 1 |
| 1234 | CHIP1372 | STM/STY    | STM2059 | STY2264 | ATGGAAA TTATTCG ATGGAAA    | 1 |
| 1235 | CHIP1342 | STM/STY    | STM0290 | STY0320 | ATGGATC TTATTCG ATGGATC    | 1 |
| 1236 | CHIP4725 | STM/STY    | STM2426 | STY2662 | ATGCCTG TTAAGC GTGCCTG     | 1 |
| 1237 | CHIP3128 | STM specil | STM2584 |         | ATGACAT TTAACGA TTGACAT,   | 1 |



|      |          |              |         |          |                          |   |
|------|----------|--------------|---------|----------|--------------------------|---|
| 1238 | CHIP3090 | STM/STY      | STM2492 | STY2730  | ATGGTGA TTAGGCT ATGGTGA  | 1 |
| 1239 | CHIP3100 | STM/STY      | STM2518 | STY2763a | ATGGAAA TTATTGA ATGGAAA  | 1 |
| 1240 | CHIP3045 | STM/STY      | STM2380 | STY2611  | ATGATCG TTATTGT ATGATCG  | 1 |
| 1241 | CHIP3054 | STM/STY      | STM2400 | STY2638  | ATGATCT TTAACGC ATGATCT  | 1 |
| 1242 | CHIP2872 | STM/STY      | STM1770 | STY1282  | ATGCCGT TTATTTT ATGCCGT  | 1 |
| 1243 | CHIP3280 | STM/STY      | STM0635 | STY0686  | ATGCATA TTAAGCA ATGCATA  | 1 |
| 1244 | CHIP3311 | STM/STY      | STM0688 | STY0726  | ATGAAAA TTATTGC ATGAAAA  | 1 |
| 1245 | CHIP3035 | STM/STY      | STM2365 | STY2596  | ATGAAAA TTAAGCA ATGAAAA  | 1 |
| 1246 | CHIP0514 | STM specil   | PSLT046 |          | ATGGAAC TTATACT ATGGAAC  | 1 |
| 1247 | CHIP0980 | STM specil   | PSLT025 |          | ATGGATG TTATTCC ATGGATG  | 1 |
| 1248 | CHIP1048 | STM specil   | PSLT001 |          | ATGTTTA TTAGCCC GTGTTTA  | 1 |
| 1249 | CHIP1119 | STM specil   | PSLT111 |          | ATGATGA TTACGCG ATGACTG  | 1 |
| 1250 | CHIP4324 | STM specil   | PSLT061 |          | ATGAGAA TTAACGG ATGAGAA  | 1 |
| 1251 | CHIP1059 | STM specil   | PSLT027 |          | ATGAAGC TTACCAG ATGAAGC  | 1 |
| 1252 | CHIP1049 | STM specil   | PSLT002 |          | ATGAGCT TTAGTCA AGCTATT  | 1 |
| 1253 | CHIP1052 | STM specil   | PSLT005 |          | ATGCTCA TTAGTCA ATGCTCA  | 1 |
| 1254 | CHIP1013 | none         | R460003 |          | ATGATCC TTAACTC ATGATCC  | 0 |
| 1255 | CHIP4780 | STM/STY      | STM0475 | STY0519  | ACTCACC CGAAGAA ACTCACC  | 1 |
| 1256 | CHIP4784 | STM/STY      |         |          | TGTTTGT AATGCGA TGTTTGT  | 0 |
| 1257 | CHIP4788 | STM/STY      |         |          | CGTGAAA CAGATCC CGTGAAA  | 0 |
| 1258 | CHIP4792 | STM/STY      | STM0555 | STY0602a | AACGAGA TGCAAGG AACGAGA  | 1 |
| 1259 | CHIP4796 | STM/STY      |         |          | GATTTTG TTTAACG GATTTTG  | 0 |
| 1260 | CHIP4800 | STM/STY      |         |          | GCTTGAC TTCACCT GCTTGAC  | 0 |
| 1261 | CHIP5012 | STY specific |         | STY1498  | ATGATTA TTAGACG ATGATTA  | 0 |
| 1262 | CHIP5028 | STY specific |         | STY1604  | ATGAATG TTAGTTG ATGAATG  | 0 |
| 1263 | CHIP5044 | STY specific |         | STY1620  | ATGTCTG TTATTTAC ATGTCTG | 0 |
| 1264 | CHIP5059 | STY specific |         | STY1637  | ATGGCAA TTATGCC ATGGCAA  | 0 |
| 1265 | CHIP5075 | STY specific |         | STY2004  | ATGAGAC TTATGGT ATGAGAC  | 0 |
| 1266 | CHIP5096 | STY specific |         | STY2035  | ATGATTA TTAGATA ATGATTA  | 0 |
| 1267 | CHIP5038 | STY specific |         | STY1614  | ATGGCCA TTATGTG ATGGCCA  | 0 |
| 1268 | CHIP5053 | STY specific |         | STY1630  | ATGTTTG TTACACA ATGTTTG  | 0 |
| 1269 | CHIP5069 | STY specific |         | STY1886  | ATGCTCG TTAACAG ATGCTCG  | 0 |
| 1270 | CHIP4998 | STY specific |         | STY1070  | ATGGCTC TTATGCT ATGGCTC  | 0 |
| 1271 | CHIP5106 | STY specific |         | STY2046  | ATGTTTC TTATCTC ATGTTTC  | 0 |
| 1272 | CHIP5121 | STY specific |         | STY2062  | ATGAAAA TTAAGCA ATGAAAA  | 0 |
| 1273 | CHIP5048 | STY specific |         | STY1624  | ATGATGA TTAGCTG GTGATGA  | 0 |
| 1274 | CHIP5063 | STM/STY      |         | STY1665  | ATGCTTA TTAATCC ATGCTTA  | 0 |
| 1275 | CHIP5079 | STY specific |         | STY2015  | ATGAGCA TTAGAGT ATGAGCA  | 0 |
| 1276 | CHIP5100 | STY specific |         | STY2040  | ATGACTT TTAGGCC ATGACTT  | 0 |
| 1277 | CHIP5115 | STY specific |         | STY2056  | ATGTGCG TTATAAT ATGTGCG  | 0 |
| 1278 | CHIP5131 | STY specific |         | STY2072  | ATGATTA TTAGATT ATGATTA  | 0 |
| 1279 | CHIP5065 | STM/STY      |         | STY1742  | ATGAATG TTACCTC ATGAATG  | 0 |
| 1280 | CHIP5081 | STY specific |         | STY2017  | ATGCGAT TTATGCC ATGCGAT  | 0 |
| 1281 | CHIP5094 | STY specific |         | STY2033  | ATGCCAA TTATAGC ATGCCAA  | 0 |
| 1282 | CHIP5203 | STY specific |         | STY3278  | ATGATAA TTAGTGA ATGATAA  | 0 |
| 1283 | CHIP5133 | STY specific |         | STY2074  | ATGAACG TTAGGAG ATGAACG  | 0 |
| 1284 | CHIP5149 | STY specific |         | STY2352  | ATGGTTA TTATTTA TTGGTTA  | 0 |
| 1285 | CHIP5358 | STY specific |         | STY4599  | ATGAATA TTATTGA ATGAATA  | 0 |
| 1286 | CHIP5379 | STM/STY      |         |          | ATGCGAA TTAGTGG ATGCGAA  | 0 |
| 1287 | CHIP5313 | STY specific |         | STY4546  | ATGAGTC TTAGTAC ATGAGTC  | 0 |
| 1288 | CHIP5327 | STY specific |         | STY4565  | ATGGCTA TTAGCTG ATGGCTA  | 0 |
| 1289 | CHIP5343 | STY specific |         | STY4583  | ATGTCAG TTACAAT ATGTCAG  | 0 |

|      |          |              |         |         |                         |   |
|------|----------|--------------|---------|---------|-------------------------|---|
| 1290 | CHIP5359 | STY specific |         | STY4600 | ATGATGA TTAAAAAATGATGA  | 0 |
| 1291 | CHIP5421 | STY specific |         | STY4834 | ATGGGGCTTACTGT ATGGGGC  | 0 |
| 1292 | CHIP5437 | STY specific |         | STY4922 | ATGTCGA TTATTCACATGTCGA | 0 |
| 1293 | CHIP5295 | STM/STY      |         | STY4480 | ATGATGC TTATTGTGTGATGC  | 0 |
| 1294 | CHIP5311 | STY specific |         | STY4543 | ATGGCTG TTATTTTTGTGGCTG | 0 |
| 1295 | CHIP5407 | STY specific |         | STY4756 | ATGTTGA TTAGCGA ATGTTGA | 0 |
| 1296 | CHIP5422 | STM/STY      |         | STY4835 | ATGTTCC TTAGTGA TTGTTCC | 0 |
| 1297 | CHIP2688 | STM/STY      | STM0172 | STY0194 | ATGACCA TTATGCG ATGACCA | 1 |
| 1298 | CHIP2720 | STM/STY      | STM0229 | STY0252 | ATGGCGCTTATTGT(ATGGCGC  | 1 |
| 1299 | CHIP2736 | STM/STY      | STM1511 | STY1550 | ATGATCG TTAGCTAATGATCG  | 1 |
| 1300 | CHIP0778 | STM/STY      | STM4292 | STY4491 | ATGAAGA TTAGCTT ATGAAGA | 1 |
| 1301 | CHIP0794 | STM/STY      | STM2396 | STY2633 | ATGTTGA TTAGAAT ATGTTGA | 1 |
| 1302 | CHIP2601 | STM/STY      | STM3872 | STY3906 | ATGTCTG TTACCCT ATGTCTG | 1 |
| 1303 | CHIP0788 | STM/STY      | STM3385 | STY3565 | ATGTTCC TTAGTTC ATGTTCC | 1 |
| 1304 | CHIP0804 | STM/STY      | STM2034 | STY2239 | ATGACGA TTAGGCC ATGACGA | 1 |
| 1305 | CHIP0820 | STM/STY      | STM2018 | STY2221 | ATGATTC TTATTTAATGATTC  | 1 |
| 1306 | CHIP2635 | STM/STY      | STM0061 | STY0070 | ATGAAAG TTAGCCT ATGAAAG | 1 |
| 1307 | CHIP3235 | STM/STY      | STM3305 | STY3484 | ATGAATT TTAACGA ATGAATT | 1 |
| 1308 | CHIP3251 | STM specil   | STM3343 |         | ATGCTGT TTATGCC ATGCTGT | 1 |
| 1309 | CHIP2653 | STM/STY      | STM0095 | STY0110 | ATGGGGA TTAAAAAATGGGGA  | 1 |
| 1310 | CHIP2677 | STM/STY      | STM0152 | STY0175 | ATGTCAG TTACGCC ATGTCAG | 1 |
| 1311 | CHIP2693 | STM specil   | STM0177 |         | ATGAAAC TTAGTTA ATGAAAC | 1 |
| 1312 | CHIP2709 | STM/STY      | STM0208 | STY0230 | ATGGCAT TTAGTGT ATGGCAT | 1 |
| 1313 | CHIP2725 | STM/STY      | STM0240 | STY0265 | ATGATTG TTAATCC ATGATTG | 1 |
| 1314 | CHIP2741 | STM/STY      | STM1524 | STY1536 | ATGACCA TTAGACG ATGACCA | 1 |
| 1315 | CHIP3287 | STM/STY      | STM0648 | STY0699 | ATGCAAG TTAGCCA ATGCAAG | 1 |
| 1316 | CHIP3303 | STM specil   | STM0672 |         | ATGAATT TTAGTTC ATGAATT | 1 |
| 1317 | CHIP3327 | STM/STY      | STM0716 | STY0756 | ATGAAAA TTATACTGTGAAAA  | 1 |
| 1318 | CHIP3720 | STM/STY      | STM4552 | STY4905 | ATGTTGC TTATCCC ATGTTGC | 1 |
| 1319 | CHIP4032 | STM/STY      | STM2715 | STY4620 | ATGAATC TTATACTATGAATC  | 1 |
| 1320 | CHIP4056 | STM specil   | STM2749 |         | ATGAAAA TTATGTCATGAAAA  | 1 |
| 1321 | CHIP3722 | STM/STY      | STM4563 | STY4914 | ATGAAAA TTACGCC ATGAAAA | 1 |
| 1322 | CHIP3738 | STM/STY      | STM4593 | STY4941 | ATGCAAT TTAGTGG GTGCAAT | 1 |
| 1323 | CHIP3762 | STM specil   | STM0293 |         | ATGTTAA TTAGTTC ATGTTAA | 1 |
| 1324 | CHIP3778 | STM specil   | STM0326 |         | ATGCAGG TTACGAA ATGCAGG | 1 |
| 1325 | CHIP3794 | STM specil   | STM1053 |         | ATGTGTG TTATTGG ATGTGTG | 1 |
| 1326 | CHIP1122 | STM/STY      | STM4330 | STY4690 | ATGGCAG TTACATC ATGGCAG | 1 |
| 1327 | CHIP3772 | STM/STY      | STM0312 | STY0357 | ATGCGTA TTATTTTATGCGTA  | 1 |
| 1328 | CHIP3788 | STM specil   | STM1045 |         | ATGCAGG TTAAGAC ATGCAGG | 1 |
| 1329 | CHIP3804 | STM/STY      | STM1079 | STY1102 | ATGATAG TTAGTTAATGATAG  | 1 |
| 1330 | CHIP3828 | STM/STY      | STM1122 | STY1157 | ATGTCGC TTAACGC ATGTCGC | 1 |
| 1331 | CHIP3844 | STM/STY      | STM1157 | STY1194 | ATGAAAA TTAGTTC ATGAAAA | 1 |
| 1332 | CHIP3860 | STM/STY      | STM1205 | STY1245 | ATGGCAG TTACAAG GTGGCAG | 1 |
| 1333 | CHIP3806 | STM/STY      | STM1081 | STY1104 | ATGAAAA TTATCTTATGAAAA  | 1 |
| 1334 | CHIP2382 | STM/STY      | STM3400 | STY4397 | ATGAACC TTAGGAT GTGAACC | 1 |
| 1335 | CHIP2398 | STM/STY      | STM3456 | STY4342 | ATGGCAA TTAGTCC ATGGCAA | 1 |
| 1336 | CHIP2414 | STM/STY      | STM3493 | STY4303 | ATGAAGT TTAGAAC GTGAAGT | 1 |
| 1337 | CHIP2430 | STM specil   | STM3518 |         | ATGGCAA TTAGTCG ATGGCAA | 1 |
| 1338 | CHIP2446 | STM/STY      | STM3541 | STY4270 | ATGAGTA TTAGCTC GTGAGTA | 1 |
| 1339 | CHIP3488 | STM/STY      | STM0964 | STY0962 | ATGGCCA TTACGCC ATGGCCA | 1 |
| 1340 | CHIP4097 | STM/STY      | STM4014 | STY3865 | ATGGAGC TTATACA ATGGAGC | 1 |
| 1341 | CHIP4113 | STM/STY      | STM4075 | STY3795 | ATGTTGA TTATGCC ATGTTGA | 1 |

|      |          |            |         |         |                          |   |
|------|----------|------------|---------|---------|--------------------------|---|
| 1342 | CHIP4137 | STM specil | STM4115 |         | ATGACAT TTAACCT(ATGACAT  | 1 |
| 1343 | CHIP4153 | STM/STY    | STM2859 | STY2981 | ATGTCGT TTACGCT.ATGTCGT  | 1 |
| 1344 | CHIP4169 | STM/STY    | STM2917 | STY3042 | ATGTTAA TTATACC ATGTTAA  | 1 |
| 1345 | CHIP4131 | STM/STY    | STM4108 | STY3759 | ATGGATC TTATTCC(ATGGATC  | 1 |
| 1346 | CHIP4147 | STM/STY    | STM2850 | STY2972 | ATGAGTG TTACGCC ATGAGTG  | 1 |
| 1347 | CHIP4163 | STM/STY    | STM2908 | STY3032 | ATGAAAA TTAACCTG TTGAAAA | 1 |
| 1348 | CHIP4187 | STM specil | STM2942 |         | ATGAGTG TTAATCT ATGAGTG  | 1 |
| 1349 | CHIP3059 | STM/STY    | STM2413 | STY2652 | ATGACGC TTATTTG(ATGACGC  | 1 |
| 1350 | CHIP3083 | STM/STY    | STM2480 | STY2718 | ATGACGG TTACGTT GTGACGC  | 1 |
| 1351 | CHIP3517 | STM specil | STM1026 |         | ATGTGTC TTAATTAC(ATGTGTC | 0 |
| 1352 | CHIP4118 | STM/STY    | STM4085 | STY3785 | ATGAGAC TTAGAGA ATGAGAC  | 1 |
| 1353 | CHIP4134 | STM specil | STM4112 |         | ATGAAAG TTAATTC ATGAAAG  | 1 |
| 1354 | CHIP3590 | STM/STY    | STM4287 | STY4486 | ATGCCAG TTACAAT(ATGCCAG  | 1 |
| 1355 | CHIP3614 | STM specil | STM4346 |         | ATGAGTC TTACACA(ATGAGTC  | 1 |
| 1356 | CHIP3062 | STM/STY    | STM2422 | STY2658 | ATGCCTC TTAGGCC ATGCCTC  | 1 |
| 1357 | CHIP0217 | STM/STY    | STM1258 | STY1862 | ATGCTGA TTAGCAT ATGCTGA  | 1 |
| 1358 | CHIP2316 | STM/STY    | STM1480 | STY1588 | ATGTCTG TTAAGC ATGTCTG   | 1 |
| 1359 | CHIP0257 | STM/STY    | STM2514 |         | ATGACGT TTAATCC ATGACGT  | 1 |
| 1360 | CHIP0281 | STM/STY    | STM0022 | STY0025 | ATGAAAA TTATGAA(ATGAAAA  | 1 |
| 1361 | CHIP3625 | STM/STY    | STM4373 | STY4729 | ATGATGC TTAACCA ATGATGC  | 1 |
| 1362 | CHIP3641 | STM/STY    | STM4409 | STY4768 | ATGATTT TTATAAT GTGATTT  | 1 |
| 1363 | CHIP3643 | STM/STY    | STM4416 | STY4775 | ATGCGCA TTAATAC(ATGCGCA  | 1 |
| 1364 | CHIP2987 | STM/STY    | STM2274 | STY2501 | ATGAGTA TTAGGTT ATGAGTA  | 1 |
| 1365 | CHIP3683 | STM specil | STM4492 |         | ATGCAAA TTAAGG TTGCAAA   | 1 |
| 1366 | CHIP3699 | STM/STY    | STM4517 | STY4874 | ATGCAAC TTAATTC ATGCAAC  | 1 |
| 1367 | CHIP2279 | STM/STY    | STM1133 | STY1170 | ATGATGA TTAGCCA ATGATGA  | 1 |
| 1368 | CHIP2303 | STM/STY    | STM1334 | STY1777 | ATGAGTC TTAATGT GTGAGTC  | 1 |
| 1369 | CHIP3029 | STM/STY    | STM2357 | STY2587 | ATGGATA TTATCCC ATGGATA  | 1 |
| 1370 | CHIP0214 | STM/STY    | STM1255 | STY1865 | ATGATTA TTACCGA ATGATTA  | 1 |
| 1371 | CHIP0230 | STM specil | STM0198 |         | ATGAGGC TTATTGG ATGAGGC  | 1 |
| 1372 | CHIP2329 | STM/STY    | STM1153 | STY1190 | ATGACCA TTAACGC ATGACCA  | 1 |
| 1373 | CHIP2345 | STM/STY    | STM1282 | STY1835 | ATGGCCG TTAAGCC ATGGCCG  | 1 |
| 1374 | CHIP2361 | STM/STY    | STM1427 | STY1695 | ATGAGTT TTAGCGA ATGAGTT  | 1 |
| 1375 | CHIP2331 | STM/STY    | STM1160 | STY1198 | ATGAAAT TTATTGG ATGAAAT  | 1 |
| 1376 | CHIP2347 | STM/STY    | STM1294 | STY1820 | ATGGCGC TTAATCA ATGGCGC  | 1 |
| 1377 | CHIP0288 | STM/STY    | STM3997 | STY3883 | ATGAAAA TTATTTT ATGAAAA  | 1 |
| 1378 | CHIP3912 | STM/STY    | STM1311 | STY1802 | ATGAACA TTAATGC ATGAACA  | 1 |
| 1379 | CHIP0513 | STM specil | STM1868 |         | ATGTATA TTATAAA(ATGTATA  | 0 |
| 1380 | CHIP3960 | STM/STY    | STM1449 | STY1673 | ATGGCAA TTATTTCC(ATGGCAA | 1 |
| 1381 | CHIP3946 | STM/STY    | STM1373 | STY1750 | ATGACAT TTATCCC ATGACAT  | 1 |
| 1382 | CHIP0547 | STM/STY    | STM1170 | STY1209 | ATGCAGG TTACGCC ATGCAGG  | 1 |
| 1383 | CHIP0563 | STM/STY    | STM1416 | STY1704 | ATGGAAA TTAACCT ATGGAAA  | 1 |
| 1384 | CHIP1414 | STM/STY    | STM3873 | STY3905 | ATGACCG TTAACCT ATGACCG  | 1 |
| 1385 | CHIP1430 | STM/STY    | STM2646 | STY2839 | ATGATTA TTACAGG ATGATTA  | 1 |
| 1386 | CHIP1358 | STM/STY    | STM0236 | STY0261 | ATGACCA TTAGGCA ATGACCA  | 1 |
| 1387 | CHIP1456 | STM/STY    | STM0401 | STY0439 | ATGTTGA TTAACGA ATGTTGA  | 1 |
| 1388 | CHIP1472 | STM/STY    | STM4189 | STY4406 | ATGTTAA TTAATAC GTGTTAA  | 1 |
| 1389 | CHIP1488 | STM/STY    | STM4273 | STY4471 | ATGAAGA TTAATGC ATGAAGA  | 1 |
| 1390 | CHIP3909 | STM/STY    | STM1306 | STY1808 | ATGACGC TTATCCA ATGACGC  | 1 |
| 1391 | CHIP3925 | STM/STY    | STM1345 | STY1765 | ATGACCC TTAACCT ATGACCC  | 1 |
| 1392 | CHIP3957 | STM/STY    | STM1439 | STY1683 | ATGGTTC TTACGGC ATGGTTC  | 1 |
| 1393 | CHIP0552 | STM specil | STM2770 |         | ATGGAAT TTATTC ATGGAAT   | 1 |

|      |          |            |         |         |                          |   |
|------|----------|------------|---------|---------|--------------------------|---|
| 1394 | CHIP3999 | STM/STY    | STM2097 | STY2307 | ATGAAGA T TACTGG GTGAAGA | 1 |
| 1395 | CHIP1435 | STM/STY    | STM2571 | STY2817 | ATGAATC TTAGTGT ATGAATC  | 1 |
| 1396 | CHIP1363 | STM/STY    | STM0205 | STY0227 | ATGCTCG TTAACGT ATGCTCG  | 1 |
| 1397 | CHIP1379 | STM/STY    | STM0076 | STY0086 | ATGAACA TTATCGC ATGAACA  | 1 |
| 1398 | CHIP1395 | STM/STY    | STM0147 | STY0169 | ATGACGC TTACTACT ATGACGC | 1 |
| 1399 | CHIP2053 | STM/STY    | STM3613 | STY4190 | ATGCAGG T TACTGT ATGCAGG | 1 |
| 1400 | CHIP2069 | STM/STY    | STM3523 | STY4280 | ATGAAAC TTAACAC ATGAAAC  | 1 |
| 1401 | CHIP1510 | STM/STY    | STM2305 | STY2535 | ATGACAT TTAATTTT ATGACAT | 1 |
| 1402 | CHIP1534 | STM/STY    | STM2520 | STY2765 | ATGCAAT TTAACGC ATGCAAT  | 1 |
| 1403 | CHIP1019 | STM/STY    | STM0412 | STY0450 | ATGCGGC T TACTGG ATGCGGC | 0 |
| 1404 | CHIP1590 | STM/STY    | STM0558 | STY0606 | ATGAAAA TTAACCA ATGAAAA  | 1 |
| 1405 | CHIP2024 | STM/STY    | STM4577 | STY4924 | ATGGCTC T TACTCT ATGGCTC | 1 |
| 1406 | CHIP2040 | STM/STY    | STM3666 | STY4132 | ATGAACC TTAGAAA ATGAACC  | 1 |
| 1407 | CHIP2056 | STM/STY    | STM3604 | STY4199 | ATGACGA TTAGTGA ATGACGA  | 1 |
| 1408 | CHIP2072 | STM/STY    | STM3494 | STY4302 | ATGACCA TTAGGCA ATGACCA  | 1 |
| 1409 | CHIP1513 | STM/STY    | STM2290 | STY2520 | ATGAGCA TTAATGA ATGAGCA  | 1 |
| 1410 | CHIP1537 | STM/STY    | STM2497 | STY2738 | ATGACGC T TACTGA ATGACGC | 1 |
| 1411 | CHIP1523 | STM/STY    | STM2337 | STY2567 | ATGTCGA TTAGGCA ATGTCGA  | 1 |
| 1412 | CHIP1000 | STM/STY    | STM1015 | STY1023 | ATGAAAA T TATTTT ATGAAAA | 0 |
| 1413 | CHIP1571 | STM/STY    | STM0532 | STY0580 | ATGAAAA T TACAGA ATGAAAA | 1 |
| 1414 | CHIP1995 | STM/STY    | STM4407 | STY4766 | ATGTTAA TTAGGCC ATGTTAA  | 1 |
| 1415 | CHIP3159 | STM specil | STM2616 |         | ATGACCA T TACCAC ATGACCA | 1 |
| 1416 | CHIP3175 | STM/STY    | STM3179 | STY3356 | ATGAGTA TTAAGCA ATGAGTA  | 1 |
| 1417 | CHIP0595 | STM/STY    | STM3484 | STY4312 | ATGAAAA T TATTTT ATGAAAA | 1 |
| 1418 | CHIP0707 | STM/STY    | STM2206 | STY2442 | ATGTTCC T TATGCG ATGTTCC | 1 |
| 1419 | CHIP0723 | STM/STY    | STM2278 | STY2507 | ATGGCAT TTAGAGC ATGGCAT  | 1 |
| 1420 | CHIP0755 | STM/STY    | STM2456 | STY2693 | ATGCCTG T TACGCA ATGCCTG | 1 |
| 1421 | CHIP1806 | STM/STY    | STM4080 | STY3790 | ATGAACA T TATGCT ATGAACA | 1 |
| 1422 | CHIP1838 | STM/STY    | STM0695 | STY0733 | ATGGCCA TTAGACT ATGGCCA  | 1 |
| 1423 | CHIP0742 | STM/STY    | STM1242 | STY1882 | ATGACTT T TACAGC ATGACTT | 1 |
| 1424 | CHIP0766 | STM/STY    | STM2886 | STY3009 | ATGGATT T TATTCC ATGGATT | 1 |
| 1425 | CHIP1825 | STM/STY    | STM3996 | STY3884 | ATGAACG TTAATAC ATGAACG  | 1 |
| 1426 | CHIP1857 | STM/STY    | STM0853 | STY0893 | ATGGTCG TTAGACC ATGGTCG  | 1 |
| 1427 | CHIP1889 | STM/STY    | STM3464 | STY4333 | ATGTCAG T TATTCC ATGTCAG | 1 |
| 1428 | CHIP0687 | STM/STY    | STM4187 | STY4404 | ATGGTTG TTAGCGA ATGGTTG  | 1 |
| 1429 | CHIP1260 | STM/STY    | STM1676 | STY1388 | ATGGAAT TTAATCG GTGGAAT  | 1 |
| 1430 | CHIP0457 | STM/STY    | STM3416 | STY4382 | ATGGCAA T TACTTG ATGGCAA | 1 |
| 1431 | CHIP0473 | STM/STY    | STM2184 | STY2414 | ATGTTAA T TAAAGC ATGTTAA | 1 |
| 1432 | CHIP0106 | STM/STY    | STM1731 | STY1320 | ATGTTTC T TACTTG ATGTTTC | 1 |
| 1433 | CHIP0130 | STM/STY    | STM4173 | STY3712 | ATGAGTT TTAATCC GTGAGTT  | 1 |
| 1434 | CHIP4729 | STM/STY    | STM2505 | STY2746 | ATGCGCT TTAATGT TTGCGCT  | 0 |
| 1435 | CHIP4216 | STM/STY    | STM3003 | STY3144 | ATGTGCT T TATACA TGCTCAC | 1 |
| 1436 | CHIP0396 | STM/STY    | STM2891 |         | ATGTCAT T TATGTT ATGTCAT | 0 |
| 1437 | CHIP0412 | STM/STY    | STM2065 | STY2271 | ATGAGCA T TATGCC ATGAGCA | 1 |
| 1438 | CHIP1271 | STM/STY    | STM3363 | STY3544 | ATGAATG TTAATGC ATGAATG  | 1 |
| 1439 | CHIP1295 | STM/STY    | STM0016 | STY0016 | ATGAATC TTAGGTC ATGAATC  | 1 |
| 1440 | CHIP4676 | STM/STY    | STM0560 | STY0609 | ATGGAAT TTAATTG ATGGAAT  | 1 |
| 1441 | CHIP1305 | STM/STY    | STM0047 | STY0056 | ATGAGTA T TATGCC ATGAGTA | 1 |
| 1442 | CHIP4686 | STM/STY    | STM0715 | STY0755 | ATGACGA TTAATTTT ATGACGA | 1 |
| 1443 | CHIP4702 | STM/STY    | STM1666 | STY1398 | ATGTCGC T TACGCA ATGTCGC | 1 |
| 1444 | CHIP0143 | STM/STY    | STM4018 | STY3860 | ATGAGTC T TAAACC ATGAGTC | 1 |
| 1445 | CHIP0175 | STM/STY    | STM2408 | STY2649 | ATGACTG T TATGAC ATGACTG | 1 |

|      |          |            |         |         |                          |   |
|------|----------|------------|---------|---------|--------------------------|---|
| 1446 | CHIP0391 | STM/STY    | STM2189 | STY2422 | ATGGGCA TTAAGG ATGGGCA   | 1 |
| 1447 | CHIP2308 | STM/STY    | STM1365 | STY1758 | ATGTTCC TTAATC TTCCACA   | 1 |
| 1448 | CHIP1700 | STM/STY    | STM1763 | STY1289 | ATGAAAA TTATGCG ATGAAAA  | 1 |
| 1449 | CHIP1716 | STM/STY    | STM1798 | STY1926 | ATGAGTG TTATTCT GTGAGTG  | 1 |
| 1450 | CHIP1732 | STM/STY    | STM3020 | STY3165 | ATGCGTT TTATTTCT ATGCGTT | 1 |
| 1451 | CHIP1748 | STM/STY    | STM2962 | STY3100 | ATGAGTT TTATGAT ATGAGTT  | 1 |
| 1452 | CHIP1764 | STM/STY    | STM3008 | STY3151 | ATGCACT TTACGGC ATGCACT  | 1 |
| 1453 | CHIP0004 | STM/STY    | STM3984 | STY3576 | ATGGAAT TTACGCC ATGGAAT  | 1 |
| 1454 | CHIP0523 | STM/STY    | STM3539 | STY4271 | ATGAAAA TTACGCC AAAAATG  | 1 |
| 1455 | CHIP0967 | STM/STY    | STM0092 | STY0107 | ATGAAGA TTAGTTA ATGAAGA  | 1 |
| 1456 | CHIP0060 | STM/STY    | STM3922 | STY3633 | ATGAAAC TTAGCGT ATGAAAC  | 1 |
| 1457 | CHIP0076 | STM/STY    | STM3903 | STY3654 | ATGACGA TTATGAA ATGACGA  | 1 |
| 1458 | CHIP1703 | STM/STY    | STM1752 | STY1298 | ATGGCTG TTACTTC ATGGCTG  | 1 |
| 1459 | CHIP0094 | STM/STY    | STM4153 | STY3732 | ATGGTTT TTACTCG ATGGTTT  | 1 |
| 1460 | CHIP1713 | STM/STY    | STM1808 | STY1937 | ATGTCCC TTAGGCT ATGTCCC  | 1 |
| 1461 | CHIP0902 | STM/STY    | STM0103 | STY0120 | ATGGCAA TTAATGA ATGGCAA  | 1 |
| 1462 | CHIP0926 | STM/STY    | STM1745 | STY1305 | ATGTTGA TTAATAG ATGTTGA  | 1 |
| 1463 | CHIP0942 | STM/STY    | STM2166 | STY2396 | ATGAAAT TTACAGT ATGAAAT  | 1 |
| 1464 | CHIP0007 | STM/STY    | STM3981 |         | ATGCGTG TTACTCA GTGCGTG  | 1 |
| 1465 | CHIP4456 | STM/STY    | STM0597 | STY0641 | ATGGCAA TTAATGA ATGGCAA  | 1 |
| 1466 | CHIP2848 | STM/STY    | STM1710 | STY1341 | ATGCTTT TTAGCTT ATGCTTT  | 1 |
| 1467 | CHIP2864 | STM/STY    | STM1755 | STY1295 | ATGTCTC TTAAGCT ATGTCTC  | 1 |
| 1468 | CHIP2784 | STM specil | STM1596 |         | ATGCTGT TTAGAAA TTGCTGT  | 1 |
| 1469 | CHIP2800 | STM/STY    | STM1622 | STY1442 | ATGGCCG TTAACGC ATGGCCG  | 1 |
| 1470 | CHIP2824 | STM/STY    | STM1657 | STY1408 | ATGTTGA TTAGGCC ATGTTGA  | 1 |
| 1471 | CHIP2834 | STM/STY    | STM1672 | STY1392 | ATGCTTC TTAGTCA ATGCTTC  | 1 |
| 1472 | CHIP4395 | STM/STY    | STM0490 | STY0534 | ATGAAGC TTAACGC ATGAAGC  | 1 |
| 1473 | CHIP1151 | STM/STY    | STM0622 | STY0671 | ATGATTT TTATTCT ATGATTT  | 1 |
| 1474 | CHIP1175 | STM/STY    | STM3750 | STY4043 | ATGAAAA TTAGTTC ATGAAAA  | 1 |
| 1475 | CHIP1191 | STM/STY    | STM1581 | STY1484 | ATGAAAC TTAATAA ATGAAAC  | 1 |
| 1476 | CHIP2851 | STM/STY    | STM1716 | STY1334 | ATGGAAT TTACATC GTGGAAT  | 1 |
| 1477 | CHIP1217 | STM/STY    | STM1607 | STY1457 | ATGCGTA TTATTTT ATGCGTA  | 1 |
| 1478 | CHIP2765 | STM/STY    | STM1561 | STY1502 | ATGAAAA TTATTGT ATGAAAA  | 1 |
| 1479 | CHIP2781 | STM/STY    | STM1593 | STY1472 | ATGGCAA TTAGGCA GTGGCAA  | 1 |
| 1480 | CHIP2797 | STM/STY    | STM1619 | STY1445 | ATGGACA TTAACAA ATGGACA  | 1 |
| 1481 | CHIP2925 | STM/STY    | STM1883 | STY2089 | ATGACGC TTAGCCT ATGACGC  | 1 |
| 1482 | CHIP2845 | STM/STY    | STM1701 | STY1351 | ATGGAAC TTATTGT ATGGAAC  | 1 |
| 1483 | CHIP2847 | STM/STY    | STM1708 | STY1343 | ATGTTGG TTAAGCT ATGTTGG  | 1 |
| 1484 | CHIP4304 | STM/STY    | STM2677 | STY2864 | ATGTTTG TTATCTA ATGTTTG  | 1 |
| 1485 | CHIP4232 | STM/STY    | STM3031 | STY3179 | ATGAACA TTAGAAC ATGAACA  | 1 |
| 1486 | CHIP4248 | STM specil | STM3082 |         | ATGAAAA TTAATAA ATGAAAA  | 1 |
| 1487 | CHIP4360 | STM/STY    | STM0433 | STY0472 | ATGAGCG TTATTCT ATGAGCG  | 1 |
| 1488 | CHIP4376 | STM/STY    | STM0457 | STY0499 | ATGGCCC TTATTCT ATGGCCC  | 1 |
| 1489 | CHIP2474 | STM specil | STM3599 |         | ATGTTTT TTAGGCC ATGTTTT  | 1 |
| 1490 | CHIP4610 | STM/STY    | STM3050 | STY3206 | ATGCAGC TTAAGG ATGCAGC   | 1 |
| 1491 | CHIP2514 | STM/STY    | STM3685 | STY4111 | ATGTCAT TTAAGCT ATGTCAT  | 1 |
| 1492 | CHIP2546 | STM/STY    | STM3777 | STY4007 | ATGCGAA TTAGTTT ATGCGAA  | 1 |
| 1493 | CHIP4203 | STM/STY    | STM2976 | STY3116 | ATGAAAA TTAACGT ATGAAAA  | 1 |
| 1494 | CHIP4227 | STM/STY    | STM3025 | STY3172 | ATGACGC TTATTGT ATGACGC  | 1 |
| 1495 | CHIP4277 | STM/STY    | STM3142 | STY3313 | ATGAATA TTATTGT ATGAATA  | 1 |
| 1496 | CHIP2477 | STM/STY    | STM3603 | STY4200 | ATGCTCA TTAAGGC ATGCTCA  | 1 |
| 1497 | CHIP4613 | STM/STY    | STM3104 | STY3257 | ATGGCTA TTATTCT ATGGCTA  | 1 |

|      |          |            |          |          |                           |   |
|------|----------|------------|----------|----------|---------------------------|---|
| 1498 | CHIP2517 | STM/STY    | STM3693  | STY4103  | ATGATTG TTATGAT GTGATTG   | 1 |
| 1499 | CHIP2549 | STM/STY    | STM3780  | STY4003  | ATGCCTT TTAAGAG ATGCCTT   | 1 |
| 1500 | CHIP4302 | STM/STY    | STM2668  | STY2855  | ATGACTA TTATCCC,ATGACTA   | 1 |
| 1501 | CHIP1636 | STM/STY    | STM2160  | STY2390  | ATGGCGC TTAACCG,ATGGCGC   | 1 |
| 1502 | CHIP1652 | STM/STY    | STM2082  | STY2291  | ATGGATA TTAATAC,ATGGATA   | 1 |
| 1503 | CHIP1668 | STM/STY    | STM2114  | STY2327  | ATGCTGG TTATGTG,ATGCTGG   | 1 |
| 1504 | CHIP4568 | STM/STY    | STM2170  | STY2400  | ATGGATA TTAACGG,ATGGATA   | 1 |
| 1505 | CHIP1900 | STM/STY    | STM3404  | STY4393  | ATGTTCCG TTAATGC,ATGTTCCG | 1 |
| 1506 | CHIP2108 | STM/STY    | STM3607  | STY4196  | ATGATGG TTAATCT,ATGATGG   | 1 |
| 1507 | CHIP1694 | STM/STY    | STM1811  | STY1941  | ATGGCGC TTATTCT,ATGGCGC   | 1 |
| 1508 | CHIP2102 | STM/STY    | STM3646  | STY4156  | ATGAAGC TTATCCC,ATGAAGC   | 1 |
| 1509 | CHIP2118 | STM/STY    | STM3549  | STY4262  | ATGAACA TTATTCT,ATGAACA   | 1 |
| 1510 | CHIP2134 | STM/STY    | STM3326  | STY3505  | ATGAGCA TTAATTA,ATGAGCA   | 1 |
| 1511 | CHIP1966 | STM/STY    | STM4480  | STY4818  | ATGCAGC TTACGAC,ATGCAGC   | 1 |
| 1512 | CHIP1982 | STM/STY    | STM4322  | STY4681  | ATGCAAC TTAGGTG,GTGCAAC   | 1 |
| 1513 | CHIP2136 | STM/STY    | STM3309  | STY3488  | ATGACGC TTACATA,ATGACGC   | 1 |
| 1514 | CHIP2152 | STM/STY    | STM3244  | STY3427  | ATGCACA TTAAGCG,ATGCACA   | 1 |
| 1515 | CHIP2168 | STM/STY    | STM3146  | STY3317  | ATGCGGA TTAGACA,ATGCGGA   | 1 |
| 1516 | CHIP1609 | STM/STY    | STM2835  | STY2956  | ATGAATC,TTAGAAC,ATGAATC,  | 1 |
| 1517 | CHIP4509 | STM specil | STM2003  |          | ATGTCAC TTATGGT,ATGTCAC   | 1 |
| 1518 | CHIP4525 | STM/STY    | STM2195  | STY2429  | ATGGTTC TTACCAA,ATGGTTC   | 0 |
| 1519 | CHIP4527 | STM/STY    | STM2198  | STY2432  | ATGAGTA TTATAAC,ATGAGTA   | 1 |
| 1520 | CHIP4543 | STM specil | STM2234  |          | ATGAGGC TTATTTAT,ATGAGGC  | 1 |
| 1521 | CHIP1683 | STM/STY    | STM2205  | STY2441  | ATGAGCA TTAGTTA,ATGAGCA   | 1 |
| 1522 | CHIP1899 | STM/STY    | STM3403  | STY4394  | ATGGCTA TTATTCC,ATGGCTA   | 1 |
| 1523 | CHIP1915 | STM/STY    | STM3434  | STY4364  | ATGGGTC TTATTTAC,ATGGGTC  | 1 |
| 1524 | CHIP1931 | STM/STY    | STM3033  | STY3182  | ATGCTGA TTAGCAC,ATGCTGA   | 1 |
| 1525 | CHIP0323 | STM/STY    | STM0874  | STY0907  | ATGAGTC TTAGCGC,ATGAGTC   | 1 |
| 1526 | CHIP2230 | STM/STY    | STM3198  | STY3377  | ATGACCT TTAACA,ATGACCT    | 1 |
| 1527 | CHIP2254 | STM/STY    | STM3091  | STY3244  | ATGCCTG TTAGTCG,ATGCCTG   | 1 |
| 1528 | CHIP2270 | STM/STY    | STM1078  | STY1101  | ATGATGA TTATTTCC,ATGATGA  | 1 |
| 1529 | CHIP3378 | STM/STY    | STM0804  | STY0838  | ATGTCGC TTAATCA,ATGTCGC   | 1 |
| 1530 | CHIP3410 | STM/STY    | STM0850  | STY0889  | ATGATGC TTAATTA,ATGATGC   | 1 |
| 1531 | CHIP0374 | STM/STY    | STM1091  | STY1121  | ATGCAA,TTAAGAT,ATGCAA,    | 1 |
| 1532 | CHIP3341 | STM/STY    | STM0745  | STY0791  | ATGACTG TTACCCC,GTGACTG   | 1 |
| 1533 | CHIP3373 | STM/STY    | STM0794  | STY0827  | ATGGCTC TTATAAG,ATGGCTC   | 1 |
| 1534 | CHIP3405 | STM/STY    | STM0841  | STY0880  | ATGACGA TTAACA,ATGACGA    | 1 |
| 1535 | CHIP2194 | STM/STY    | STM3331  | STY3511  | ATGAGCC TTAACT,ATGAGCC    | 1 |
| 1536 | CHIP0327 | STM/STY    | STM3757  | STY4030  | ATGCCAA TTAGAAA,ATGCCAA   | 1 |
| 1537 | CHIP4301 | STM/STY    | STM2665  | STY2853  | ATGACAA TTAATCT,ATGACAA   | 1 |
| 1538 | CHIP1493 | STM/STY    | STM2387  | STY2619  | ATGCAAG TTAATCT,ATGCAAG   | 1 |
| 1539 | CHIP1479 | STM/STY    | STM4240  | STY4436  | ATGATGA TTACCAG,ATGATGA   | 1 |
| 1540 | CHIP0458 | STM/STY    | STM3415  | STY4383  | ATGCAGG TTAATCG,ATGCAGG   | 1 |
| 1541 | CHIP0626 | STM/STY    | STM1692  | STY1369  | ATGCGCC TTATGGT,ATGCGCC   | 1 |
| 1542 | CHIP1558 | STM/STY    | STM0462  | STY0506  | ATGAAGC TTACAGC,ATGAAGC   | 1 |
| 1543 | CHIP1816 | STM/STY    | STM4042A | STY3832  | ATGAACG TTAATTC,ATGAACG   | 1 |
| 1544 | CHIP1875 | STM/STY    | STM0721  | STY0761  | ATGAAAA,TTAGCAA,ATGAAAA,  | 1 |
| 1545 | CHIP0961 | STM/STY    | STM4141  | STY3739a | ATGGAGA TTATCGA,ATGGAGA   | 1 |
| 1546 | CHIP0993 | STM specil | STM2439  |          | ATGCCAG TTATTGT,ATGCCAG   | 1 |
| 1547 | CHIP0996 | STM specil | STM1011  |          | ATGCTCC TTAAGCA,ATGCTCC   | 0 |
| 1548 | CHIP3548 | STM specil | STM4206  |          | ATGATAA,TTATTTCC,ATGATAA, | 1 |
| 1549 | CHIP1212 | STM/STY    | STM2722  |          | ATGAACA TTAAAAA,ATGAACA   | 1 |

|      |          |              |         |         |                           |   |
|------|----------|--------------|---------|---------|---------------------------|---|
| 1550 | CHIP1134 | STM/STY      | STM1882 | STY2088 | ATGGCGC TTAGGCG ATGGCGC   | 1 |
| 1551 | CHIP4030 | STM/STY      | STM2713 |         | ATGAGGA TTATTCA (ATGAGGA  | 0 |
| 1552 | CHIP4039 | STM specil   | STM2727 |         | ATGAACT TTAATGT (ATGAACT  | 1 |
| 1553 | CHIP4121 | STM/STY      | STM4088 | STY3782 | ATGTCTT TTAGACT ATGTCTT   | 1 |
| 1554 | CHIP4179 | STM/STY      | STM2931 | STY3056 | ATGGGTA TTATCGA ATGGGTA   | 1 |
| 1555 | CHIP3949 | STM/STY      | STM1376 | STY1746 | ATGAACC TTATTTA (ATGAACC  | 1 |
| 1556 | CHIP3942 | STM/STY      | STM1367 | STY1756 | ATGATAT TTAATGC (GTGATAT  | 1 |
| 1557 | CHIP3959 | STM/STY      | STM1447 | STY1675 | ATGCCTA TTAACGC ATGCCTA   | 1 |
| 1558 | CHIP0265 | STM/STY      | STM1056 | STY1077 | ATGTTCTG TTATCTG ATGTTCTG | 1 |
| 1559 | CHIP0243 | STM/STY      | STM2464 | STY2701 | ATGGAGC TTATTTA (ATGGAGC  | 1 |
| 1560 | CHIP1398 | STM/STY      | STM0160 | STY0182 | ATGGATT TTAGGCT ATGGATT   | 1 |
| 1561 | CHIP4663 | STM/STY      | STM4191 | STY4408 | ATGGCTC TTATACC ATGGCTC   | 1 |
| 1562 | CHIP2913 | STM/STY      | STM1856 | STY1988 | ATGGAAT TTAAGC (ATGGAAT   | 1 |
| 1563 | CHIP2898 | STM/STY      | STM1833 | STY1962 | ATGACTA TTATATC (ATGACTA  | 1 |
| 1564 | CHIP2922 | STM/STY      | STM1875 | STY2081 | ATGGCTT TTATTTA (ATGGCTT  | 1 |
| 1565 | CHIP2917 | STM/STY      | STM1869 | STY1043 | ATGAATC TTAATGC (ATGAATC  | 1 |
| 1566 | CHIP4710 | STM/STY      | STM1926 | STY2135 | ATGATTA TTATAAC (ATGATTA  | 1 |
| 1567 | CHIP1056 | STM specil   | PSLT022 |         | ATGTCAG TTAGGAC ATGTCAG   | 0 |
| 1568 | CHIP1104 | STM specil   | PSLT095 |         | ATGAAAC TTATTTA (ATGAAAC  | 1 |
| 1569 | CHIP1073 | STM specil   | PSLT058 |         | ATGTGGC TTAGGTG CTGTGGC   | 0 |
| 1570 | CHIP1105 | STM specil   | PSLT096 |         | ATGAAGA TTAAGC (ATGAAGA   | 1 |
| 1571 | CHIP1050 | STM specil   | PSLT003 |         | ATGATCC TTAGGCT TTGATCC   | 1 |
| 1572 | CHIP1098 | STM specil   | PSLT089 |         | ATGAGTA TTACGGC ATGAGTA   | 1 |
| 1573 | CHIP0944 | none         | R460027 |         | ATGAAAG TTATTCT (ATGAAAG  | 0 |
| 1574 | CHIP0954 | none         | R460022 |         | ATGGAGC TTACAGT (ATGGAGC  | 0 |
| 1575 | CHIP4889 | none         | R460034 |         | ATGCACT TTATGCT (ATGCACT  | 0 |
| 1576 | CHIP4876 | none         | R460011 |         | ATGTTCTG TTAAGC (ATGTTCTG | 0 |
| 1577 | CHIP4870 | none         | R460004 |         | ATGAAAA TTAGCGA GTGAAAA   | 0 |
| 1578 | CHIP4897 | none         | R460048 |         | ATGTTTA TTAACGG ATGTTTA   | 0 |
| 1579 | CHIP4801 | STM/STY      |         |         | TTTTTCC (GGGTATT TTTTTCC  | 0 |
| 1580 | CHIP4805 | STM specific |         |         | TTTACTT TCAACAAA TTTACTT  | 0 |
| 1581 | CHIP4809 | STM/STY      |         |         | CAATTTT (AGGAACA CAATTTT  | 0 |
| 1582 | CHIP4813 | STM specific |         |         | ATGAAAG ACTTTAT (ATGAAAG  | 0 |
| 1583 | CHIP4817 | STM specil   | STM2614 |         | GCCAGCA GTTCCAG GCCAGCA   | 1 |
| 1584 | CHIP4821 | STM/STY      |         |         | ACTAAAG TTCCGGT ACTAAAG   | 0 |
| 1585 | CHIP5189 | STY specific |         | STY3071 | ATGACAC TTACCAT (ATGACAC  | 0 |
| 1586 | CHIP5119 | STY specific |         | STY2060 | ATGGCAA TTACTGT (ATGGCAA  | 0 |
| 1587 | CHIP5135 | STY specific |         | STY2076 | ATGAATC TTAGGCA ATGAATC   | 0 |
| 1588 | CHIP5240 | STM/STY      |         | STY3677 | ATGAAGA TTACGCT ATGAAGA   | 0 |
| 1589 | CHIP5254 | STY specific |         | STY3693 | ATGCAGA TTATCTG (ATGCAGA  | 0 |
| 1590 | CHIP5270 | STY specific |         | STY3949 | ATGAACC TTAAGC (TTGAACC   | 0 |
| 1591 | CHIP5211 | STY specific |         | STY3344 | ATGGATT TTAGTCT ATGGATT   | 0 |
| 1592 | CHIP5227 | STY specific |         | STY3663 | ATGTATG TTATCGT ATGTATG   | 0 |
| 1593 | CHIP5241 | STY specific |         | STY3679 | ATGGCGA TTAGATA (GTGGCGA  | 0 |
| 1594 | CHIP5256 | STY specific |         |         | ATGGCTC TTACGCG ATGGCTC   | 0 |
| 1595 | CHIP5272 | STM/STY      |         | STY4036 | ATGTTTG TTACTTT (ATGTTTG  | 0 |
| 1596 | CHIP5015 | STM/STY      |         | STY1555 | ATGAAAA TTATTTA (ATGAAAA  | 0 |
| 1597 | CHIP5221 | STY specific |         | STY3645 | ATGCTGG TTAGATT ATGCTGG   | 0 |
| 1598 | CHIP5236 | STY specific |         | STY3673 | ATGACTA TTACTCA (ATGACTA  | 0 |
| 1599 | CHIP5251 | STY specific |         | STY3689 | ATGGCAG TTATTTA (ATGGCAG  | 0 |
| 1600 | CHIP5266 | STY specific |         | STY3919 | ATGAGTT TTAAGC (ATGAGTT   | 0 |
| 1601 | CHIP4922 | STY specific |         | STY0300 | ATGCCAT TTATTTA (ATGCCAT  | 0 |

|      |          |                    |         |                           |   |
|------|----------|--------------------|---------|---------------------------|---|
| 1602 | CHIP4938 | STY specific       | STY0346 | ATGTATA( TTAGCCG ATGTATA( | 0 |
| 1603 | CHIP5238 | STM/STY            | STY3675 | ATGAACA( TAAAAAA( ATGAACA | 0 |
| 1604 | CHIP5171 | STY specific       | STY2882 | ATGAATT( TTATTCC( GTGAATT | 0 |
| 1605 | CHIP5187 | STY specific       | STY3069 | ATGCTGA( TTATTTG( ATGCTGA | 0 |
| 1606 | CHIP4924 | STM/STY            | STY0306 | ATGATAA( TTAATTT( ATGATAA | 0 |
| 1607 | CHIP4940 | STY specific       | STY0348 | ATGAGTA( TTAGGGC( ATGAGTA | 0 |
| 1608 | CHIP4956 | STY specific       | STY1016 | ATGACAC( TTATCGC( ATGACAC | 0 |
| 1609 | CHIP5278 | STM/STY            |         | ATGATAA( TTACCGC( ATGATAA | 0 |
| 1610 | CHIP5291 | STY specific       | STY4412 | ATGAATC( TTAGTCA( ATGAATC | 0 |
| 1611 | CHIP5314 | STY specific       | STY4547 | ATGTTAA( TTAGCCG( ATGTTAA | 0 |
| 1612 | CHIP5411 | STY specific       | STY4823 | ATGAGGA( TTATGAT( ATGAGGA | 0 |
| 1613 | CHIP5426 | STM/STY            | STY4843 | ATGGCGT( TTATCCA( ATGGCGT | 0 |
| 1614 | CHIP5279 | STM/STY            | STY4143 | ATGCAAA( TTAATTA( ATGCAAA | 0 |
| 1615 | CHIP5348 | STY specific       | STY4588 | ATGAACG( TTAAGCA( ATGAACG | 0 |
| 1616 | CHIP5282 | STY specific       | STY4207 | ATGTATA( TTAGAGC( ATGTATA | 0 |
| 1617 | CHIP5296 | STM/STY            | STY4512 | ATGGGTC( TTAGTTA( TTGGGTC | 0 |
| 1618 | CHIP5393 | STY specific       | STY4667 | ATGCCAG( TTATTTT( ATGCCAG | 0 |
| 1619 | CHIP5408 | STM/STY            | STY4810 | ATGAGTT( TTAAGA( GTGAGTT  | 0 |
| 1620 | CHIP5423 | STY specific       | STY4837 | ATGTATA( TTACACC( ATGTATA | 0 |
| 1621 | CHIP3264 | STM/STY STM3371    | STY3551 | ATGACAA( TTAGCCG( ATGACAA | 1 |
| 1622 | CHIP3296 | STM specil STM0657 |         | ATGGACA( TTATAAA( ATGGACA | 1 |
| 1623 | CHIP3312 | STM/STY STM0691    | STY0729 | ATGGTTG( TTAAGCT( ATGGTTG | 1 |
| 1624 | CHIP2569 | STM/STY STM3822    | STY3956 | ATGAAAA( TTAATCA( ATGAAAA | 1 |
| 1625 | CHIP0802 | STM specil STM3171 |         | ATGGACT( TTAGGAA( ATGGACT | 1 |
| 1626 | CHIP0818 | STM/STY STM2020    | STY2223 | ATGCTTG( TTATGAC( ATGCTTG | 1 |
| 1627 | CHIP2579 | STM/STY STM3834    | STY3944 | ATGAATT( TTACCGC( ATGAATT | 1 |
| 1628 | CHIP2595 | STM/STY STM3857    | STY3926 | ATGAAAG( TTAATAC( ATGAAAG | 1 |
| 1629 | CHIP0828 | STM/STY STM3787    | STY3995 | ATGCTGG( TTAAGCG( ATGCTGG | 1 |
| 1630 | CHIP2643 | STM/STY STM0079    | STY0089 | ATGCAGC( TTAACGA( ATGCAGC | 1 |
| 1631 | CHIP2667 | STM/STY STM0129    | STY0149 | ATGAATA( TTAGCCA( ATGAATA | 1 |
| 1632 | CHIP2683 | STM/STY STM0163    | STY0185 | ATGGAGA( TTATGCC( GTGGAGA | 1 |
| 1633 | CHIP2661 | STM/STY STM0120    | STY0140 | ATGATGG( TTATGCG( ATGATGG | 1 |
| 1634 | CHIP3253 | STM/STY STM3345    | STY3525 | ATGAAAA( TTAGATG( ATGAAAA | 1 |
| 1635 | CHIP3269 | STM/STY STM3380    | STY3560 | ATGTTGG( TTAATTT( ATGTTGG | 1 |
| 1636 | CHIP3285 | STM/STY STM0644    | STY0695 | ATGGCGT( TTAATCA( ATGGCGT | 1 |
| 1637 | CHIP3301 | STM/STY STM0665    | STY0710 | ATGCAAT( TTAGTTA( ATGCAAT | 1 |
| 1638 | CHIP3317 | STM/STY STM0698    | STY0736 | ATGGCAA( TTAGGCG( ATGGCAA | 1 |
| 1639 | CHIP2719 | STM/STY STM0227    | STY0250 | ATGACTA( TTAGGCC( TTGACTA | 1 |
| 1640 | CHIP2735 | STM/STY STM1509    | STY1552 | ATGATGA( TTAGTTC( ATGATGA | 1 |
| 1641 | CHIP4000 | STM/STY STM2098    | STY2308 | ATGATGA( TTATTCA( ATGATGA | 1 |
| 1642 | CHIP4016 | STM/STY STM2125    | STY2338 | ATGTTTA( TTAGCGG( GTGTTTA | 1 |
| 1643 | CHIP3744 | STM/STY STM0255    | STY0276 | ATGACTA( TTAATCC( ATGACTA | 1 |
| 1644 | CHIP3768 | STM/STY STM0300    | STY0335 | ATGGCGC( TTATTTA( ATGGCGC | 1 |
| 1645 | CHIP4018 | STM/STY STM2129    | STY2342 | ATGACAG( TTACAGG( ATGACAG | 1 |
| 1646 | CHIP4034 | STM/STY STM2719    | STY4624 | ATGAGCC( TTAGCGG( ATGAGCC | 1 |
| 1647 | CHIP4058 | STM specil STM2751 |         | ATGATGA( TTATGGC( ATGATGA | 1 |
| 1648 | CHIP4074 | STM specil STM2767 |         | ATGTCCA( TTATAGT( ATGTCCA | 1 |
| 1649 | CHIP4090 | STM/STY STM2795    | STY2915 | ATGGGAC( TTATTCT( ATGGGAC | 1 |
| 1650 | CHIP3818 | STM/STY STM1099    | STY1131 | ATGAAAC( TTATTTA( ATGAAAC | 1 |
| 1651 | CHIP4068 | STM specil STM2761 |         | ATGAAAA( TTATTTA( ATGAAAA | 1 |
| 1652 | CHIP4084 | STM/STY STM2786    |         | ATGAAAA( TTATTTA( ATGAAAA | 1 |
| 1653 | CHIP3812 | STM/STY STM1089    |         | ATGACTT( TTAACAT( TTGACTT | 1 |



|      |          |            |         |         |                          |   |
|------|----------|------------|---------|---------|--------------------------|---|
| 1654 | CHIP2388 | STM/STY    | STM3419 | STY4379 | ATGAAAG TTAGCCT ATGAAAG  | 1 |
| 1655 | CHIP2404 | STM/STY    | STM3466 | STY4331 | ATGGTGC TTAACGG ATGGTGC  | 1 |
| 1656 | CHIP2420 | STM/STY    | STM3499 | STY4297 | ATGGAAA TTAAGCG ATGGAAA  | 1 |
| 1657 | CHIP3814 | STM/STY    | STM1094 | STY1126 | ATGAAAA TTATGGC ATGAAAA  | 1 |
| 1658 | CHIP3830 | STM/STY    | STM1127 | STY1163 | ATGGAGC TTATTTTC ATGGAGC | 1 |
| 1659 | CHIP3846 | STM/STY    | STM1161 | STY1199 | ATGGAAA TTAATGG ATGGAAA  | 1 |
| 1660 | CHIP3862 | STM/STY    | STM1207 | STY1247 | ATGACAA TTATTGT ATGACAA  | 1 |
| 1661 | CHIP3878 | STM/STY    | STM1239 | STY1893 | ATGCTCA TTAATAT ATGCTCA  | 1 |
| 1662 | CHIP3894 | STM/STY    | STM1280 | STY1838 | ATGTTTG TTAGTGG ATGTTTG  | 1 |
| 1663 | CHIP3496 | STM/STY    | STM0980 | STY0980 | ATGACGG TTAAGCG ATGACGG  | 1 |
| 1664 | CHIP3529 | STM specil | STM1038 |         | ATGACAG TTATGCC ATGACAG  | 1 |
| 1665 | CHIP3553 | STM specil | STM4211 |         | ATGGCCA TTATGCG TTGGCCA  | 1 |
| 1666 | CHIP3569 | STM/STY    | STM4245 | STY4441 | ATGGCAA TTACGGA ATGGCAA  | 1 |
| 1667 | CHIP3585 | STM/STY    | STM4282 | STY4481 | ATGAGCC TTATTTCT ATGAGCC | 1 |
| 1668 | CHIP4177 | STM/STY    | STM2928 | STY3053 | ATGACAG TTAATCA ATGACAG  | 1 |
| 1669 | CHIP3563 | STM/STY    | STM4223 | STY4419 | ATGGTTA TTATGAT GTGGTTA  | 1 |
| 1670 | CHIP3579 | STM/STY    | STM4270 | STY4468 | ATGGATA TTACGGT ATGGATA  | 1 |
| 1671 | CHIP3595 | STM/STY    | STM4306 | STY4506 | ATGAAAC TTATGCA ATGAAAC  | 1 |
| 1672 | CHIP3043 | STM/STY    | STM2378 | STY2609 | ATGAAAC TTACAAC ATGAAAC  | 1 |
| 1673 | CHIP3067 | STM/STY    | STM2435 | STY2672 | ATGGGAC TTATCGC ATGGGAC  | 1 |
| 1674 | CHIP3467 | STM specil | STM0924 |         | ATGAACA TTATTTTA ATGAACA | 1 |
| 1675 | CHIP4102 | STM/STY    | STM4034 | STY3843 | ATGAGTA TTATTCC ATGAGTA  | 1 |
| 1676 | CHIP3550 | STM specil | STM4208 |         | ATGGCTG TTAATGT ATGGCTG  | 1 |
| 1677 | CHIP3566 | STM/STY    | STM4235 | STY4431 | ATGTCCG TTAATGT ATGTCCG  | 1 |
| 1678 | CHIP4166 | STM/STY    | STM2912 | STY3037 | ATGCTCA TTACGAT ATGCTCA  | 1 |
| 1679 | CHIP4190 | STM/STY    | STM2950 | STY3078 | ATGGCGT TTAATGT ATGGCGT  | 1 |
| 1680 | CHIP3446 | STM specil | STM0902 |         | ATGCGTA TTATTTCT ATGCGTA | 1 |
| 1681 | CHIP2300 | STM/STY    | STM1315 | STY1798 | ATGATGC TTAATGT ATGATGC  | 1 |
| 1682 | CHIP0241 | STM/STY    | STM2466 | STY2702 | ATGATCA TTATTTCA ATGATCA | 1 |
| 1683 | CHIP2340 | STM/STY    | STM1232 | STY1272 | ATGGAAT TTATTTTA ATGGAAT | 1 |
| 1684 | CHIP2364 | STM/STY    | STM1432 | STY1690 | ATGAATC TTAGCGA ATGAATC  | 1 |
| 1685 | CHIP2953 | STM/STY    | STM1967 | STY2175 | ATGATGA TTATTTTA GTGATGA | 1 |
| 1686 | CHIP2977 | STM/STY    | STM2256 | STY2482 | ATGAAAA TTATTTTC ATGAAAA | 1 |
| 1687 | CHIP3651 | STM specil | STM4424 |         | ATGGGAC TTAAGA GTGGGAC   | 1 |
| 1688 | CHIP3667 | STM/STY    | STM4447 | STY4786 | ATGAAAC TTACACC ATGAAAC  | 1 |
| 1689 | CHIP3011 | STM/STY    | STM2321 | STY2551 | ATGACCT TTACGGT ATGACCT  | 1 |
| 1690 | CHIP3027 | STM/STY    | STM2348 | STY2578 | ATGAGTA TTAGCCT ATGAGTA  | 1 |
| 1691 | CHIP0204 | STM/STY    | STM1955 | STY2163 | ATGACGG TTAATAT ATGACGG  | 1 |
| 1692 | CHIP0228 | STM specil | STM0196 |         | ATGGCTC TTAATGT ATGGCTC  | 1 |
| 1693 | CHIP0198 | STM/STY    | STM1927 | STY2136 | ATGAGCT TTAGTCG ATGAGCT  | 1 |
| 1694 | CHIP2297 | STM/STY    | STM1307 | STY1807 | ATGGATA TTAGGGC ATGGATA  | 1 |
| 1695 | CHIP2313 | STM/STY    | STM1448 | STY1674 | ATGTCTG TTAGGGC ATGTCTG  | 1 |
| 1696 | CHIP0254 | STM/STY    | STM4064 | STY3807 | ATGAAAA TTAGCGG ATGAAAA  | 1 |
| 1697 | CHIP0270 | STM/STY    | STM2863 | STY2985 | ATGAACT TTAAGAA ATGAACT  | 1 |
| 1698 | CHIP2369 | STM/STY    | STM1452 | STY1670 | ATGTCTA TTAAACT GTGTCTA  | 1 |
| 1699 | CHIP0256 | STM/STY    | STM2513 | STY2755 | ATGTCGT TTACCAG ATGTCGT  | 1 |
| 1700 | CHIP2355 | STM/STY    | STM1346 | STY1764 | ATGTCGC TTATTTG ATGTCGC  | 1 |
| 1701 | CHIP2371 | STM/STY    | STM1454 | STY1668 | ATGAGCC TTAGACT ATGAGCC  | 1 |
| 1702 | CHIP0489 | STM/STY    | STM1430 | STY1692 | ATGGCAA TTAACGC ATGGCAA  | 1 |
| 1703 | CHIP3944 | STM/STY    | STM1371 | STY1752 | ATGTTAA TTACTGC ATGTTAA  | 1 |
| 1704 | CHIP0537 | STM/STY    | STM2869 | STY2990 | ATGATAA TTACCTT ATGATAA  | 0 |
| 1705 | CHIP3954 | STM/STY    | STM1434 | STY1688 | ATGTCCG TTATTTG ATGTCCG  | 1 |

|      |          |            |         |         |                           |   |
|------|----------|------------|---------|---------|---------------------------|---|
| 1706 | CHIP3978 | STM/STY    | STM1482 | STY1585 | ATGTTTT/TTAAATT(ATGTTTT/  | 1 |
| 1707 | CHIP3994 | STM specil | STM2088 |         | ATGAAAG TTATCCC GTGAAAG   | 1 |
| 1708 | CHIP1326 | STM/STY    | STM3800 | STY3979 | ATGACTG TTACACC ATGACTG   | 1 |
| 1709 | CHIP1438 | STM/STY    | STM2647 | STY2840 | ATGGCGA TTATTCA(ATGGCGA   | 1 |
| 1710 | CHIP1454 | STM/STY    | STM0397 | STY0432 | ATGGCGA TTA AAAAG(ATGGCGA | 1 |
| 1711 | CHIP1368 | STM/STY    | STM0245 | STY0272 | ATGGCGT TTACCAG ATGGCGT   | 1 |
| 1712 | CHIP1384 | STM/STY    | STM0100 | STY0117 | ATGAATG TTA AAAA(ATGAATG  | 1 |
| 1713 | CHIP1400 | STM/STY    | STM0070 | STY0080 | ATGAGTG TTAACGA ATGAGTG   | 1 |
| 1714 | CHIP0486 | STM/STY    | STM1950 | STY2158 | ATGCAGG TTATATC/ATGCAGG   | 1 |
| 1715 | CHIP0502 | STM/STY    | STM1683 | STY1378 | ATGCGTC TTA CTCT ATGCGTC  | 1 |
| 1716 | CHIP0542 | STM/STY    | STM3563 | STY4249 | ATGTCCG TTATACTIATGTCCG   | 1 |
| 1717 | CHIP3983 | STM/STY    | STM1490 | STY1574 | ATGCATC TTAATGC ATGCATC   | 1 |
| 1718 | CHIP1323 | STM/STY    | STM3793 | STY3989 | ATGGATA TTATTCCG ATGGATA  | 1 |
| 1719 | CHIP1443 | STM/STY    | STM0357 | STY0388 | ATGTTGA TTAATAAC ATGTTGA  | 1 |
| 1720 | CHIP1459 | STM/STY    | STM0416 | STY0455 | ATGCAGC TTATGCG ATGCAGC   | 1 |
| 1721 | CHIP1475 | STM/STY    | STM4233 | STY4429 | ATGTCAC TTAGTAC ATGTCAC   | 1 |
| 1722 | CHIP1403 | STM/STY    | STM0097 | STY0112 | ATGGCGC TTA AAAAT/GTGGCGC | 1 |
| 1723 | CHIP3201 | STM/STY    | STM3239 | STY3421 | ATGGAAT TTAAGAG ATGGAAT   | 1 |
| 1724 | CHIP2077 | STM/STY    | STM3481 | STY4315 | ATGACTA TTACGGT ATGACTA   | 1 |
| 1725 | CHIP0971 | STM/STY    | STM0345 | STY0378 | ATGCATT TTA CTGC ATGCATT  | 1 |
| 1726 | CHIP1542 | STM/STY    | STM2442 | STY2679 | ATGGCGC TTAATGC ATGGCGC   | 1 |
| 1727 | CHIP1566 | STM/STY    | STM0507 | STY0553 | ATGCCAG TTATGCC ATGCCAG   | 1 |
| 1728 | CHIP1598 | STM/STY    | STM0605 | STY0649 | ATGTCGG TTATTTCT(ATGTCGG  | 1 |
| 1729 | CHIP3172 | STM/STY    | STM2651 | STY2844 | ATGAGCC TTACGAT ATGAGCC   | 1 |
| 1730 | CHIP3188 | STM/STY    | STM3204 | STY3383 | ATGAAGA TTAGCTG GTGAAGA   | 1 |
| 1731 | CHIP3204 | STM/STY    | STM3248 | STY3430 | ATGACGA TTAGCGA ATGACGA   | 1 |
| 1732 | CHIP3220 | STM/STY    | STM3276 | STY3459 | ATGACTG TTAGCCC ATGACTG   | 1 |
| 1733 | CHIP0974 | STM specil | STM1043 |         | ATGAAAA TTAGGTTI ATGAAAA  | 1 |
| 1734 | CHIP0998 | STM/STY    | STM1013 | STY1021 | ATGGCTT TTAGTCC ATGGCTT   | 0 |
| 1735 | CHIP1531 | STM/STY    | STM2529 | STY2774 | ATGAGTC TTATGCA ATGAGTC   | 1 |
| 1736 | CHIP1547 | STM/STY    | STM2547 | STY2793 | ATGACCC TTATTTAC ATGACCC  | 1 |
| 1737 | CHIP1587 | STM/STY    | STM0533 | STY0581 | ATGAAGC TTATTTA ATGAAGC   | 1 |
| 1738 | CHIP3143 | STM specil | STM2599 |         | ATGTTTG TTAAGCC GTGTTTG   | 1 |
| 1739 | CHIP2019 | STM/STY    | STM4551 | STY4904 | ATGACAA TTATAGG ATGACAA   | 1 |
| 1740 | CHIP2035 | STM/STY    | STM3707 | STY4088 | ATGAAAA TTAAGAC ATGAAAA   | 1 |
| 1741 | CHIP0691 | STM/STY    | STM2353 | STY2583 | ATGTTGT TTACAAA ATGTTGT   | 1 |
| 1742 | CHIP0619 | STM/STY    | STM0012 | STY0012 | ATGGGTA TTATTTTI ATGGGTA  | 1 |
| 1743 | CHIP0635 | STM/STY    | STM1723 | STY1328 | ATGCAAA TTAGAAG ATGCAAA   | 1 |
| 1744 | CHIP0667 | STM/STY    | STM2809 | STY2934 | ATGGCAA TTAGCCA ATGGCAA   | 1 |
| 1745 | CHIP1814 | STM/STY    | STM4051 | STY3821 | ATGGATT TTAGAAT(ATGGATT   | 1 |
| 1746 | CHIP1846 | STM/STY    | STM0646 | STY0697 | ATGATCA TTA CCA ATGATCA   | 1 |
| 1747 | CHIP0750 | STM/STY    | STM2462 | STY2699 | ATGGCGC TTAGCTT(ATGGCGC   | 1 |
| 1748 | CHIP1801 | STM/STY    | STM4125 | STY3749 | ATGAATA TTA AAC(ATGAATA   | 1 |
| 1749 | CHIP1833 | STM/STY    | STM0779 | STY0812 | ATGCAGG TTAGCAC ATGCAGG   | 1 |
| 1750 | CHIP1865 | STM/STY    | STM0770 | STY0802 | ATGACCT TTAGAGA ATGACCT   | 1 |
| 1751 | CHIP0583 | STM/STY    | STM2806 | STY2931 | ATGAGCC TTAGCG ATGAGCC    | 1 |
| 1752 | CHIP0703 | STM/STY    | STM1339 | STY1771 | ATGGCGC TTA CTCT ATGGCGC  | 1 |
| 1753 | CHIP1276 | STM/STY    | STM3379 | STY3559 | ATGGATA TTA CTGC ATGGATA  | 1 |
| 1754 | CHIP1292 | STM/STY    | STM0053 | STY0062 | ATGCAAG TTATTTI ATGCAAG   | 1 |
| 1755 | CHIP1308 | STM/STY    | STM0036 | STY0043 | ATGATGT TTAACA ATGATGT    | 1 |
| 1756 | CHIP4689 | STM/STY    | STM1245 | STY1880 | ATGGAAC TTAACAC ATGGAAC   | 1 |
| 1757 | CHIP4713 | STM/STY    | STM2010 | STY2212 | ATGACAG TTATATG/ATGACAG   | 1 |

|      |          |         |         |         |                         |   |
|------|----------|---------|---------|---------|-------------------------|---|
| 1758 | CHIP0154 | STM/STY | STM3868 | STY3910 | ATGTCTG TTAAGAC ATGTCTG | 1 |
| 1759 | CHIP0188 | STM/STY | STM2049 | STY2254 | ATGCATC TTAACAC ATGCATC | 1 |
| 1760 | CHIP1231 | STM/STY | STM4307 | STY4508 | ATGCATG TTACATT ATGCATG | 1 |
| 1761 | CHIP1247 | STM/STY | STM1909 | STY2117 | ATGAATA TTACATG GTGAATA | 1 |
| 1762 | CHIP1279 | STM/STY | STM3367 | STY3547 | ATGGAAC TTATTTT ATGGAAC | 1 |
| 1763 | CHIP0468 | STM/STY | STM3718 | STY4077 | ATGAGCA TTATTCA ATGAGCA | 1 |
| 1764 | CHIP0101 | STM/STY | STM4329 | STY4689 | ATGAGTA TTACGCT ATGAGTA | 1 |
| 1765 | CHIP0478 | STM/STY | STM1141 | STY1178 | ATGAAAC TTAGAAT ATGAAAC | 1 |
| 1766 | CHIP0111 | STM/STY | STM4025 | STY3853 | ATGAGTC TTACGCT ATGAGTC | 1 |
| 1767 | CHIP0127 | STM/STY | STM4170 | STY3715 | ATGAACA TTAAGCA ATGAACA | 1 |
| 1768 | CHIP4726 | STM/STY | STM2434 | STY2671 | ATGAAGA TTACAAC ATGAAGA | 1 |
| 1769 | CHIP0183 | STM/STY | STM2044 | STY2249 | ATGGACA TTATACT ATGGACA | 1 |
| 1770 | CHIP1226 | STM/STY | STM4296 | STY4495 | ATGATGA TTAGGCT ATGATGA | 1 |
| 1771 | CHIP0081 | STM/STY | STM3898 | STY3707 | ATGGCGC TTAATCA ATGGCGC | 1 |
| 1772 | CHIP0873 | STM/STY | STM1961 | STY2169 | ATGTACA TTAACGA ATGTACA | 1 |
| 1773 | CHIP0889 | STM/STY | STM1713 | STY1337 | ATGAAAT TTAATCA ATGAAAT | 1 |
| 1774 | CHIP0905 | STM/STY | STM4247 | STY4443 | ATGCAAG TTAATCA ATGCAAG | 1 |
| 1775 | CHIP0921 | STM/STY | STM3321 | STY3500 | ATGCAGC TTAGTGT ATGCAGC | 1 |
| 1776 | CHIP0937 | STM/STY | STM0429 | STY0468 | ATGAAAC TTAATCA ATGAAAC | 1 |
| 1777 | CHIP0012 | STM/STY | STM3976 | STY3583 | ATGTTTG TTAGAAT ATGTTTG | 1 |
| 1778 | CHIP0028 | STM/STY | STM3959 | STY3600 | ATGATGA TTAGCGC ATGATGA | 1 |
| 1779 | CHIP0044 | STM/STY | STM3942 | STY3617 | ATGTTTT TTACCA ATGTTTT  | 1 |
| 1780 | CHIP1958 | STM/STY | STM4443 | STY4782 | ATGTTAA TTATTAT TTAATCC | 1 |
| 1781 | CHIP2611 | STM/STY | STM0006 | STY0006 | ATGTTAA TTATCCC TTAACGA | 1 |
| 1782 | CHIP0876 | STM/STY | STM1182 | STY1221 | ATGATCG TTAAGAG ATGATCG | 1 |
| 1783 | CHIP0870 | STM/STY | STM1969 | STY2177 | ATGAGTG TTAATCA ATGAGTG | 1 |
| 1784 | CHIP0886 | STM/STY | STM2948 | STY3076 | ATGACGA TTAGTAG ATGACGA | 1 |
| 1785 | CHIP1737 | STM/STY | STM3000 | STY3138 | ATGAAAA TTATTGA ATGAAAA | 1 |
| 1786 | CHIP1761 | STM/STY | STM3022 | STY3167 | ATGTCTA TTAGCCG ATGTCTA | 1 |
| 1787 | CHIP1777 | STM/STY | STM4089 | STY3781 | ATGAAAT TTAATCA ATGAAAT | 1 |
| 1788 | CHIP0015 | STM/STY | STM3972 | STY3587 | ATGACGC TTAACGA ATGACGC | 1 |
| 1789 | CHIP1196 | STM/STY | STM1588 | STY1477 | ATGCCGC TTACATG ATGCCGC | 1 |
| 1790 | CHIP2752 | STM/STY | STM1544 | STY1518 | ATGTTTA TTAATCG ATGTTTA | 1 |
| 1791 | CHIP2768 | STM/STY | STM1566 | STY1494 | ATGGAAA TTAATG ATGGAAA  | 1 |
| 1792 | CHIP2888 | STM/STY | STM1812 | STY1942 | ATGTATC TTACAGA ATGTATC | 1 |
| 1793 | CHIP2904 | STM/STY | STM1843 | STY1974 | ATGGAAA TTACGCC ATGGAAA | 1 |
| 1794 | CHIP2928 | STM/STY | STM1887 | STY2095 | ATGAATA TTAGCGG ATGAATA | 1 |
| 1795 | CHIP2938 | STM/STY | STM1902 | STY2110 | ATGCTGA TTATAAG ATGCTGA | 1 |
| 1796 | CHIP4403 | STM/STY | STM0506 | STY0552 | ATGCTCA TTAGGAG ATGCTCA | 1 |
| 1797 | CHIP4419 | STM/STY | STM0530 | STY0578 | ATGTTTA TTAACCT ATGTTTA | 1 |
| 1798 | CHIP4443 | STM/STY | STM0577 |         | ATGAGAC TTAATGC ATGAGAC | 1 |
| 1799 | CHIP1199 | STM/STY | STM1642 | STY1427 | ATGAGCA TTAAGCG ATGAGCA | 1 |
| 1800 | CHIP2755 | STM/STY | STM1548 | STY1513 | ATGACTA TTATCCC ATGACTA | 1 |
| 1801 | CHIP2853 | STM/STY | STM1720 | STY1330 | ATGAGCC TTATAAG ATGAGCC | 1 |
| 1802 | CHIP2869 | STM/STY | STM1766 | STY1286 | ATGTTTA TTATTCA ATGTTTA | 1 |
| 1803 | CHIP2885 | STM/STY | STM1805 | STY1934 | ATGGTCA TTATCGT ATGGTCA | 1 |
| 1804 | CHIP2909 | STM/STY | STM1850 | STY1981 | ATGGGGC TTAACCA ATGGGGC | 1 |
| 1805 | CHIP2829 | STM/STY | STM1665 | STY1399 | ATGTCTT TTAACA ATGTCTT  | 1 |
| 1806 | CHIP4390 | STM/STY | STM0481 | STY0525 | ATGCTGT TTAGCGG ATGCTGT | 1 |
| 1807 | CHIP4288 | STM/STY | STM3166 | STY3340 | ATGCATA TTAATAC ATGCATA | 1 |
| 1808 | CHIP4312 | STM/STY | STM2690 | STY2876 | ATGGGAA TTATGGC ATGGGAA | 1 |
| 1809 | CHIP4328 | STM/STY | STM4530 | STY4888 | ATGAAGA TTAATTC ATGAAGA | 1 |

|      |          |            |         |         |                           |   |
|------|----------|------------|---------|---------|---------------------------|---|
| 1810 | CHIP4344 | STM/STY    | STM0392 | STY0425 | ATGCTGT TTAGCGC ATGCTGT   | 1 |
| 1811 | CHIP4272 | STM/STY    | STM3126 | STY3295 | ATGTTTA TTAACC ATGTTTA    | 1 |
| 1812 | CHIP4576 | STM/STY    | STM2567 | STY2813 | ATGAAAA TTATTTT TTGAAAA   | 1 |
| 1813 | CHIP4594 | STM/STY    | STM2784 | STY2903 | ATGTACG TTAGCTC ATGTACG   | 1 |
| 1814 | CHIP4618 | STM/STY    | STM3163 | STY3335 | ATGAATC TTAGCTC ATGAATC   | 1 |
| 1815 | CHIP4634 | STM specil | STM0840 |         | ATGAAAA TTAAGT CTGAAAA    | 1 |
| 1816 | CHIP2554 | STM/STY    | STM3803 | STY3976 | ATGACAG TTAACGC ATGACAG   | 1 |
| 1817 | CHIP4299 | STM/STY    | STM2663 | STY2852 | ATGACGC TTAGGAT ATGACGC   | 1 |
| 1818 | CHIP4323 | STM/STY    | STM2706 | STY4611 | ATGGCAT TTATGCC GTGGCAT   | 0 |
| 1819 | CHIP4581 | STM/STY    | STM2814 | STY2940 | ATGAGCG TTAACCC ATGAGCG   | 1 |
| 1820 | CHIP4597 | STM/STY    | STM2804 | STY2928 | ATGACAA TTACATT ATGACAA   | 1 |
| 1821 | CHIP2501 | STM/STY    | STM3663 | STY4135 | ATGATAT TTACATA ATGATAT   | 1 |
| 1822 | CHIP2525 | STM/STY    | STM3724 | STY4070 | ATGCTCG TTAATGC ATGCTCG   | 1 |
| 1823 | CHIP4198 | STM/STY    | STM2971 | STY3110 | ATGATTA TTAATCG ATGATTA   | 1 |
| 1824 | CHIP4214 | STM/STY    | STM2997 | STY3135 | ATGTCGC TTAACGA ATGTCGC   | 1 |
| 1825 | CHIP4520 | STM/STY    | STM2187 | STY2418 | ATGTTAA TTACAGT ATGTTAA   | 1 |
| 1826 | CHIP4536 | STM/STY    | STM2223 | STY2460 | ATGATTT TTAACCA ATGATTT   | 1 |
| 1827 | CHIP4552 | STM/STY    | STM2246 | STY2472 | ATGCCTG TTAGTGC ATGCCTG   | 1 |
| 1828 | CHIP1692 | STM/STY    | STM1820 | STY1950 | ATGCGAA TTATTCT ATGCGAA   | 1 |
| 1829 | CHIP1908 | STM/STY    | STM3426 | STY4372 | ATGAGCA TTAGGCT ATGAGCA   | 1 |
| 1830 | CHIP1924 | STM/STY    | STM0944 | STY0942 | ATGGGTA TTAGGCT ATGGGTA   | 1 |
| 1831 | CHIP1894 | STM/STY    | STM0935 | STY0931 | ATGAAAC TTACCTT ATGAAAC   | 1 |
| 1832 | CHIP1918 | STM/STY    | STM3437 | STY4361 | ATGGCAG TTATTTG ATGGCAG   | 1 |
| 1833 | CHIP1934 | STM/STY    | STM4345 | STY4705 | ATGACCC TTAGTCC ATGACCC   | 1 |
| 1834 | CHIP1950 | STM/STY    | STM4391 | STY4747 | ATGCGTC TTAGTCT ATGCGTC   | 1 |
| 1835 | CHIP2158 | STM/STY    | STM3201 | STY3380 | ATGACGC TTAACGC ATGACGC   | 1 |
| 1836 | CHIP2174 | STM/STY    | STM3131 | STY3300 | ATGGATG TTATTTT ATGGATG   | 1 |
| 1837 | CHIP1952 | STM/STY    | STM4395 | STY4751 | ATGGATA TTACCGC ATGGATA   | 1 |
| 1838 | CHIP1968 | STM/STY    | STM4510 | STY4866 | ATGAAAC TTAGGCG ATGAAAC   | 1 |
| 1839 | CHIP1984 | STM/STY    | STM4325 | STY4684 | ATGATAG TTACAGC ATGATAG   | 1 |
| 1840 | CHIP4493 | STM/STY    | STM0375 | STY0407 | ATGCTGT TTAGGAT ATGCTGT   | 1 |
| 1841 | CHIP1633 | STM/STY    | STM2144 | STY2373 | ATGAACG TTATACG ATGAACG   | 1 |
| 1842 | CHIP1649 | STM/STY    | STM2219 | STY2455 | ATGACAT TTAGCTT ATGACAT   | 1 |
| 1843 | CHIP1651 | STM/STY    | STM2227 | STY2465 | ATGCCAC TTAGTGC ATGCCAC   | 1 |
| 1844 | CHIP1667 | STM/STY    | STM2111 | STY2323 | ATGTTTT TTAGACT ATGTTTT   | 1 |
| 1845 | CHIP4567 | STM/STY    | STM2169 | STY2399 | ATGAACC TTAGAAC ATGAACC   | 1 |
| 1846 | CHIP2091 | STM/STY    | STM3687 | STY4109 | ATGACGC TTAGCTT ATGACGC   | 1 |
| 1847 | CHIP2107 | STM/STY    | STM3608 | STY4195 | ATGACGC TTAGCGT ATGACGC   | 1 |
| 1848 | CHIP2123 | STM/STY    | STM3511 | STY4285 | ATGATCC TTAGTAG ATGATCC   | 1 |
| 1849 | CHIP2214 | STM/STY    | STM3236 | STY3416 | ATGATTA TTACACC ATGATTA   | 1 |
| 1850 | CHIP0347 | STM/STY    | STM1889 | STY2097 | ATGGAAA TTATTTG ATGGAAA   | 1 |
| 1851 | CHIP0371 | STM/STY    | STM1409 | STY1711 | ATGAAGG TTA AAAAC ATGAAGG | 1 |
| 1852 | CHIP3330 | STM/STY    | STM0720 | STY0760 | ATGATGA TTAATGA TTGATGA   | 1 |
| 1853 | CHIP3386 | STM/STY    | STM0814 | STY0849 | ATGAAGT TTAGCGG ATGAAGT   | 1 |
| 1854 | CHIP3418 | STM specil | STM0859 |         | ATGCACT TTAGTCA ATGCACT   | 1 |
| 1855 | CHIP2265 | STM/STY    | STM1062 | STY1083 | ATGTCAT TTATGCC ATGTCAT   | 1 |
| 1856 | CHIP3349 | STM specil | STM0761 |         | ATGATGG TTATTTG ATGATGG   | 1 |
| 1857 | CHIP3381 | STM/STY    | STM0807 | STY0841 | ATGGACA TTAGCGG ATGGACA   | 1 |
| 1858 | CHIP3413 | STM specil | STM0854 |         | ATGCAAA TTAATG ATGCAAA    | 1 |
| 1859 | CHIP0311 | STM/STY    | STM1383 | STY1738 | ATGGCTA TTATATA ATGGCTA   | 1 |
| 1860 | CHIP2218 | STM/STY    | STM3230 | STY3410 | ATGGCGC TTAGCAG ATGGCGC   | 1 |
| 1861 | CHIP3630 | STM/STY    | STM4382 | STY4738 | ATGAGTA TTACAGG ATGAGTA   | 1 |

|      |          |              |         |         |                          |   |
|------|----------|--------------|---------|---------|--------------------------|---|
| 1862 | CHIP0272 | STM specil   | STM1867 |         | ATGAAAC TTAATAAC ATGAAAC | 0 |
| 1863 | CHIP0357 | STM/STY      | STM1396 | STY1724 | ATGACAA TTAAGCTT ATGACAA | 1 |
| 1864 | CHIP1449 | STM/STY      | STM0379 | STY0411 | ATGCGTT TTATCGG ATGCGTT  | 1 |
| 1865 | CHIP1491 | STM/STY      | STM2390 | STY2622 | ATGAGTA TTAACGC ATGAGTA  | 1 |
| 1866 | CHIP0670 | STM/STY      | STM3471 | STY4325 | ATGAAGA TTATCGC GTGAAGA  | 1 |
| 1867 | CHIP0816 | STM/STY      | STM2022 | STY2225 | ATGAAAA TTAAGCC ATGAAAA  | 1 |
| 1868 | CHIP0935 | STM/STY      | STM0431 | STY0470 | ATGACTT TTATTTT ATGACTT  | 1 |
| 1869 | CHIP1951 | STM/STY      | STM4393 | STY4749 | ATGGCAC TTAAGTA ATGGCAC  | 1 |
| 1870 | CHIP1913 | STM/STY      | STM3432 | STY4366 | ATGAAAG TTACGCA ATGAAAG  | 1 |
| 1871 | CHIP1961 | STM/STY      | STM4449 | STY4788 | ATGGCCA TTATAAG ATGGCCA  | 1 |
| 1872 | CHIP4481 | STM/STY      | STM0349 | STY0383 | ATGAAAA TTAACGA ATGAAAA  | 1 |
| 1873 | CHIP2251 | STM/STY      | STM3095 | STY3248 | ATGATCA TTAAGTC ATGATCA  | 1 |
| 1874 | CHIP2332 | STM/STY      | STM1162 | STY1200 | ATGCGTA TTATTTCA ATGCGTA | 1 |
| 1875 | CHIP4660 | STM/STY      | STM2906 | STY3029 | ATGGAAA TTATACG CTGGAAA  | 1 |
| 1876 | CHIP4645 | STM/STY      | STM3806 |         | ATGATCT TTAGCAC GGAATCT  | 1 |
| 1877 | CHIP4669 | STM specil   | STM4214 |         | ATGAAAT TTAGCTG ATGAAAT  | 1 |
| 1878 | CHIP4646 | STM/STY      | STM3463 | STY4334 | ATGGCAG TTATTCG CTGGCAG  | 1 |
| 1879 | CHIP0098 | STM/STY      | STM0448 | STY0490 | ATGTCAT TTAATTAC ATGTCAT | 1 |
| 1880 | CHIP0173 | STM/STY      | STM1243 | STY1881 | ATGTCTC TTATGAA TTGTCTC  | 1 |
| 1881 | CHIP3902 | STM/STY      | STM1291 | STY1824 | ATGGCTA TTAGTTG ATGGCTA  | 1 |
| 1882 | CHIP3903 | STM/STY      | STM1293 | STY1821 | ATGACAA TTACCTG ATGACAA  | 1 |
| 1883 | CHIP4329 | STM/STY      | STM4558 | STY4908 | ATGAACA TTACATG ATGAACA  | 1 |
| 1884 | CHIP2608 | STM/STY      | STM3886 | STY3891 | ATGGCTA TTAACCC TTGGCTA  | 1 |
| 1885 | CHIP2920 | STM/STY      | STM1873 | STY2079 | ATGAAAA TTAGCTA ATGAAAA  | 1 |
| 1886 | CHIP4672 | STM/STY      | STM4276 | STY4474 | ATGAAAT TTATGTG ATGAAAT  | 1 |
| 1887 | CHIP4688 | STM/STY      | STM0727 | STY0770 | ATGCCCT TTATCTG ATGCCCT  | 1 |
| 1888 | CHIP4721 | STM/STY      | STM2161 | STY2391 | ATGCGCC TTACCCG ATGCGCC  | 1 |
| 1889 | CHIP4731 | STM/STY      | STM2329 | STY2559 | ATGCCCA TTAACAC GTGCCCA  | 1 |
| 1890 | CHIP2887 | STM/STY      | STM1809 | STY1938 | ATGAACA TTAGAGT ATGAACA  | 1 |
| 1891 | CHIP1072 | STM specil   | PSLT057 |         | ATGGATA TTAGCGG GTGGATA  | 1 |
| 1892 | CHIP1112 | STM specil   | PSLT104 |         | ATGAGCT TTAGAAA ATGAGCT  | 1 |
| 1893 | CHIP1081 | STM specil   | PSLT067 |         | ATGACAG TTAAGTC ATGACAG  | 1 |
| 1894 | CHIP1113 | STM specil   | PSLT105 |         | ATGGCGC TTATAAA ATGGCGC  | 0 |
| 1895 | CHIP1066 | STM specil   | PSLT043 |         | ATGAAGT TTATATT GTGAAGT  | 1 |
| 1896 | CHIP1106 | STM specil   | PSLT097 |         | ATGCGAA TTAGAAA ATGCGAA  | 1 |
| 1897 | CHIP0945 | none         | R460028 |         | ATGGAAA TTATCTC ATGGAAA  | 0 |
| 1898 | CHIP1008 | none         | R460029 |         | ATGAATG TTACACA ATGAATG  | 0 |
| 1899 | CHIP4896 | none         | R460042 |         | ATGGATA TTAGACG ATGGATA  | 0 |
| 1900 | CHIP4883 | none         | R460019 |         | ATGGCCC TTAGTTG ATGGCCC  | 0 |
| 1901 | CHIP4877 | none         | R460012 |         | ATGAGAG TTAAGCC ATGAGAG  | 0 |
| 1902 | CHIP4904 | none         | R460057 |         | ATGAGCG TTACATT ATGAGCG  | 0 |
| 1903 | CHIP4802 | STM/STY      |         |         | ATCAACC CTGCGAT ATCAACC  | 0 |
| 1904 | CHIP4806 | STM/STY      | STM0701 | STY0739 | CCCGTAA TGCGTCA CCCGTAA  | 1 |
| 1905 | CHIP4810 | STM specific |         |         | CCTGACC CTGCAGC CCTGACC  | 0 |
| 1906 | CHIP4814 | STM/STY      |         |         | CCCACCC GTTCCGC CCCACCC  | 0 |
| 1907 | CHIP4818 | STM specific |         |         | GGACCAA TGAGCCA GGACCAA  | 0 |
| 1908 | CHIP4822 | STM/STY      |         |         | TGTTGTG ACGAGAA TGTTGTG  | 0 |
| 1909 | CHIP5104 | STY specific |         | STY2044 | ATGCAGA TTATATC ATGCAGA  | 0 |
| 1910 | CHIP5209 | STY specific |         | STY3292 | ATGGAGC TTACACC TTGGAGC  | 0 |
| 1911 | CHIP5225 | STY specific |         | STY3661 | ATGAGAC TTAATTA ATGAGAC  | 0 |
| 1912 | CHIP5159 | STY specific |         | STY2420 | ATGGCTT TTACCGA GTGGCTT  | 0 |
| 1913 | CHIP5173 | STY specific |         | STY2884 | ATGAGTG TTATGCG ATGAGTG  | 0 |

|      |          |                    |  |         |                         |   |
|------|----------|--------------------|--|---------|-------------------------|---|
| 1914 | CHIP4910 | STY specific       |  | STY0114 | ATGTTTGTTAGCCA TTGTTTG  | 0 |
| 1915 | CHIP5129 | STY specific       |  | STY2070 | ATGATTGTTACCATATGATTG   | 0 |
| 1916 | CHIP5145 | STM/STY            |  | STY2345 | ATGACAGTTAAATCATGACAG   | 0 |
| 1917 | CHIP5161 | STM/STY            |  |         | ATGAATCTTATTTACATGAATC  | 0 |
| 1918 | CHIP5175 | STY specific       |  | STY2886 | ATGAGCGTTAGGCT ATGAGCG  | 0 |
| 1919 | CHIP4912 | STM/STY            |  | STY0159 | ATGAAGGTTAACGG ATGAAGG  | 0 |
| 1920 | CHIP4928 | STY specific       |  | STY0313 | ATGGGTA TTATTTTAATGGGTA | 0 |
| 1921 | CHIP5139 | STM/STY            |  | STY2203 | ATGAACA TTAGAAC ATGAACA | 0 |
| 1922 | CHIP5155 | STY specific       |  | STY2361 | ATGGGCC TTATTTTAATGGGCC | 0 |
| 1923 | CHIP5169 | STY specific       |  | STY2879 | ATGACAA TTACAAC ATGACAA | 0 |
| 1924 | CHIP5185 | STY specific       |  | STY3067 | ATGAAGGTTATGTTATGAAGG   | 0 |
| 1925 | CHIP5017 | STY specific       |  | STY1592 | ATGATGA TTA CTTCATGATGA | 0 |
| 1926 | CHIP5033 | STY specific       |  | STY1609 | ATGAACTTTATGCAATGAACT   | 0 |
| 1927 | CHIP5157 | STY specific       |  | STY2363 | ATGGCTGTTAGTTAATGGCTG   | 0 |
| 1928 | CHIP5260 | STY specific       |  | STY3762 | ATGAACA TTATGGC ATGAACA | 0 |
| 1929 | CHIP5275 | STM/STY            |  |         | ATGTACA TTATTTTATGTACA  | 0 |
| 1930 | CHIP5019 | STY specific       |  | STY1594 | ATGATTA TTAGTCG ATGATTA | 0 |
| 1931 | CHIP5035 | STY specific       |  | STY1611 | ATGTGGC TTATTTCTGTGTGGC | 0 |
| 1932 | CHIP5050 | STY specific       |  | STY1627 | ATGAGTGTTAGCAA GTGAGTG  | 0 |
| 1933 | CHIP5366 | STM/STY            |  |         | ATGGATGTTACCCC GTGGATG  | 0 |
| 1934 | CHIP5299 | STY specific       |  | STY4523 | ATGGCTA TTAATGC ATGGCTA | 0 |
| 1935 | CHIP5322 | STY specific       |  | STY4558 | ATGAAAC TTAGAATATGAAAC  | 0 |
| 1936 | CHIP5336 | STY specific       |  | STY4575 | ATGAAAC TTATTGA ATGAAAC | 0 |
| 1937 | CHIP5352 | STY specific       |  | STY4592 | ATGAACA TTAGGCC ATGAACA | 0 |
| 1938 | CHIP5367 | STM/STY STM2712    |  | STY4617 | ATGAACA TTATCCA GTGAACA | 1 |
| 1939 | CHIP5430 | STY specific       |  | STY4852 | ATGGTTC TTACCCT ATGGTTC | 0 |
| 1940 | CHIP5370 | STM/STY            |  |         | ATGACAGTTAGCAA ATGACAG  | 0 |
| 1941 | CHIP5382 | STY specific       |  | STY4650 | ATGGATA TTAGCGT ATGGATA | 0 |
| 1942 | CHIP5319 | STY specific       |  | STY4553 | ATGGAGT TTATTCCGTGGAGT  | 0 |
| 1943 | CHIP5333 | STY specific       |  | STY4572 | ATGATGG TTATATA GTGATGG | 0 |
| 1944 | CHIP5349 | STY specific       |  | STY4589 | ATGTTAT TTATGCG GTGTTAT | 0 |
| 1945 | CHIP2696 | STM/STY STM0180    |  | STY0198 | ATGATTC TTAGGCA ATGATTC | 1 |
| 1946 | CHIP2728 | STM/STY STM0244    |  | STY0271 | ATGCGTG TTATTTCTATGCGTG | 1 |
| 1947 | CHIP2744 | STM/STY STM1530    |  | STY1532 | ATGAAAA TTA AAC ATGAAAA | 1 |
| 1948 | CHIP0786 | STM/STY STM1718    |  | STY1332 | ATGAGTG TTAATAA ATGAGTG | 1 |
| 1949 | CHIP2593 | STM/STY STM3855    |  | STY3928 | ATGGCTA TTAACCG ATGGCTA | 1 |
| 1950 | CHIP2609 | STM/STY STM3887    |  | STY3889 | ATGACCA TTA CTCCATGACCA | 1 |
| 1951 | CHIP0796 | STM/STY STM4580    |  | STY4927 | ATGTCAT TTATCCC GTGTCAT | 1 |
| 1952 | CHIP0812 | STM/STY STM2026    |  | STY2231 | ATGAATG TTA CTCCGTGAATG | 1 |
| 1953 | CHIP0836 | STM/STY STM3448    |  | STY4350 | ATGGCAA TTAAGCC ATGGCAA | 1 |
| 1954 | CHIP0860 | STM/STY STM2451    |  | STY2688 | ATGAAAC TTA AACATGAAAC  | 1 |
| 1955 | CHIP3243 | STM/STY STM3319    |  | STY3498 | ATGGCAA TTAGAGT ATGGCAA | 1 |
| 1956 | CHIP3259 | STM/STY STM3358    |  | STY3538 | ATGAAAA TTAGGCT GTGAAAA | 1 |
| 1957 | CHIP2669 | STM/STY STM0135    |  | STY0155 | ATGAGTG TTAGCTG GTGAGTG | 0 |
| 1958 | CHIP2685 | STM/STY STM0168    |  | STY0190 | ATGTTACTTAGACC ATGTTACT | 1 |
| 1959 | CHIP2701 | STM/STY STM0187    |  | STY0212 | ATGCTAT TTACAACATGCTAT  | 1 |
| 1960 | CHIP2717 | STM/STY STM0223    |  | STY0246 | ATGCTGA TTACAACATGCTGA  | 1 |
| 1961 | CHIP2733 | STM/STY STM1507    |  | STY1554 | ATGGATT TTAGGCGATGGATT  | 1 |
| 1962 | CHIP2749 | STM/STY STM1538    |  | STY1525 | ATGGCAT TTATCGTATGGCAT  | 1 |
| 1963 | CHIP3295 | STM specil STM0656 |  |         | ATGAAAA TTAATGCATGAAAA  | 1 |
| 1964 | CHIP3319 | STM/STY            |  |         | ATGTCAG TTATAATATGTCAG  | 0 |
| 1965 | CHIP3712 | STM specil STM4538 |  |         | ATGATTT TTA AACATGATTT  | 1 |

|      |          |              |         |         |                            |   |
|------|----------|--------------|---------|---------|----------------------------|---|
| 1966 | CHIP4024 | STM/STY      | STM2138 | STY2366 | ATGTATT( TTACGTA' ATGTATT( | 1 |
| 1967 | CHIP4040 | STM specil   | STM2730 |         | ATGAGCA TTACTGC' ATGAGCA   | 1 |
| 1968 | CHIP4064 | STM specil   | STM2757 |         | ATGAAAC' TTATGCG ATGAAAC   | 1 |
| 1969 | CHIP3730 | STM/STY      | STM4578 | STY4925 | ATGCCTA TTATTTCT' ATGCCTA  | 1 |
| 1970 | CHIP3746 | STM/STY      | STM0260 | STY0281 | ATGAAGG TTAGGAG ATGAAGG    | 1 |
| 1971 | CHIP3770 | STM/STY      | STM0310 | STY0355 | ATGTACC TTATTTAA' ATGTACC  | 1 |
| 1972 | CHIP3786 | STM specil   | STM0333 |         | ATGCAAC TTACAGT' TTGCAAC   | 1 |
| 1973 | CHIP3802 | STM/STY      | STM1072 | STY1094 | ATGAGAG TTACCCA' ATGAGAG   | 1 |
| 1974 | CHIP2378 | STM/STY      | STM1492 | STY1572 | ATGGATA TTATCGT' ATGGATA   | 1 |
| 1975 | CHIP3780 | STM specil   | STM0327 |         | ATGGTTA' TTACACG GTGGTTA   | 1 |
| 1976 | CHIP3796 | STM/STY      | STM1059 | STY1080 | ATGCGAA TTAACCA' ATGCGAA   | 1 |
| 1977 | CHIP2372 | STM/STY      | STM1455 | STY1667 | ATGCTGA TTATTCT' ATGCTGA   | 1 |
| 1978 | CHIP3836 | STM/STY      | STM1137 | STY1174 | ATGAATG TTATTCT' ATGAATG   | 1 |
| 1979 | CHIP3852 | STM/STY      | STM1189 | STY1228 | ATGCCCC TTATTGC' ATGCCCC   | 1 |
| 1980 | CHIP3868 | STM/STY      | STM1215 |         | ATGTTCA' TTACAGC ATGTTCA   | 1 |
| 1981 | CHIP2374 | STM/STY      | STM1459 | STY1663 | ATGACTG TTACAAC' ATGACTG   | 1 |
| 1982 | CHIP2390 | STM/STY      | STM3424 | STY4374 | ATGGATA TTAGAAC' ATGGATA   | 1 |
| 1983 | CHIP2406 | STM/STY      | STM3468 | STY4328 | ATGGCAA TTAGGCC ATGGCAA    | 1 |
| 1984 | CHIP2422 | STM/STY      | STM3505 | STY4291 | ATGCAAT TTAACAG' ATGCAAT   | 1 |
| 1985 | CHIP2438 | STM specific |         |         | ATGATGA TTAGCGC ATGATGA    | 0 |
| 1986 | CHIP2454 | STM specil   | STM3558 |         | ATGACCC TTAGGCA ATGACCC    | 1 |
| 1987 | CHIP3504 | STM/STY      | STM0992 | STY0994 | ATGAGTG TTAATAT' ATGAGTG   | 1 |
| 1988 | CHIP4105 | STM/STY      | STM4054 | STY3817 | ATGAAGC TTAATTT' ATGAAGC   | 1 |
| 1989 | CHIP4129 | STM/STY      | STM4104 | STY3765 | ATGAAAG TTACTTC' ATGAAAG   | 1 |
| 1990 | CHIP4145 | STM/STY      | STM4128 | STY3746 | ATGAAAC' TTATTCC' ATGAAAC  | 1 |
| 1991 | CHIP4161 | STM/STY      | STM2905 | STY3027 | ATGATGT TTATAAC' ATGATGT   | 1 |
| 1992 | CHIP4185 | STM specil   | STM2940 |         | ATGAGCC TTATTCT' ATGAGCC   | 1 |
| 1993 | CHIP4139 | STM/STY      | STM4117 | STY3756 | ATGTATC' TTATCCT' ATGTATC  | 1 |
| 1994 | CHIP4155 | STM specil   | STM2865 |         | ATGATAT' TTACGGT ATGATAT   | 1 |
| 1995 | CHIP4171 | STM/STY      | STM2920 | STY3045 | ATGGAGT TTACGTC' ATGGAGT   | 1 |
| 1996 | CHIP3051 | STM/STY      | STM2392 | STY2624 | ATGAAGC TTATTCC' ATGAAGC   | 1 |
| 1997 | CHIP3451 | STM specil   | STM0908 |         | ATGAATC' TTACTTC' ATGAATC  | 1 |
| 1998 | CHIP3091 | STM/STY      | STM2493 | STY2734 | ATGCTCG TTAGGAT' ATGCTCG   | 1 |
| 1999 | CHIP3534 | STM/STY      | STM4185 | STY4403 | ATGCCGC TTACGAA' ATGCCGC   | 1 |
| 2000 | CHIP4126 | STM/STY      | STM4100 | STY3769 | ATGACGC TTACCCC ATGACGC    | 1 |
| 2001 | CHIP4142 | STM/STY      | STM4120 | STY3753 | ATGAAAA' TTAATGC' ATGAAAA  | 1 |
| 2002 | CHIP4174 | STM/STY      | STM2925 | STY3050 | ATGAGCG TTATCGC' ATGAGCG   | 1 |
| 2003 | CHIP3046 | STM/STY      | STM2381 | STY2613 | ATGAACA' TTAATTA' ATGAACA  | 1 |
| 2004 | CHIP3070 | STM/STY      | STM2445 | STY2682 | ATGGGTA TTAGACG ATGGGTA    | 1 |
| 2005 | CHIP0225 | STM/STY      | STM2241 | STY2467 | ATGCCCT TTAGTTA' ATGCCCT   | 0 |
| 2006 | CHIP2324 | STM/STY      | STM1100 | STY1132 | ATGCATG TTATGCT' ATGCATG   | 1 |
| 2007 | CHIP2348 | STM/STY      | STM1301 | STY1813 | ATGATAA' TTAGCAC ATGATAA   | 1 |
| 2008 | CHIP3617 | STM/STY      | STM4350 | STY4710 | ATGAGTG TTACAGC ATGAGTG    | 1 |
| 2009 | CHIP3633 | STM/STY      | STM4386 | STY4742 | ATGTCAT TTAGCCC ATGTCAT    | 1 |
| 2010 | CHIP3657 | STM specil   | STM4431 |         | ATGAAAA' TTAGGCG ATGAAAA   | 1 |
| 2011 | CHIP2979 | STM/STY      | STM2260 | STY2486 | ATGCGCA TTATGGT' ATGCGCA   | 1 |
| 2012 | CHIP3675 | STM specil   | STM4483 |         | ATGAACG TTAGACG ATGAACG    | 1 |
| 2013 | CHIP3691 | STM/STY      | STM4500 | STY4856 | ATGATGA TTATCGC' ATGATGA   | 1 |
| 2014 | CHIP3707 | STM/STY      | STM4533 | STY4892 | ATGTTAA' TTAATAA' ATGTTAA  | 1 |
| 2015 | CHIP2287 | STM/STY      | STM1221 | STY1261 | ATGCAGT TTACAGC ATGCAGT    | 1 |
| 2016 | CHIP2311 | STM/STY      | STM1440 | STY1682 | ATGAAGC TTATTTAA' ATGAAGC  | 1 |
| 2017 | CHIP2281 | STM/STY      | STM1148 |         | ATGCGGT TTACAGC' ATGCGGT   | 0 |

|      |          |            |         |         |                            |   |
|------|----------|------------|---------|---------|----------------------------|---|
| 2018 | CHIP0222 | STM/STY    | STM3442 | STY4356 | ATGTTTG' TTAACCG ATGTTTG'  | 1 |
| 2019 | CHIP0238 | STM/STY    | STM2469 | STY2705 | ATGAAAC TTAGCTG ATGAAAC    | 1 |
| 2020 | CHIP2337 | STM/STY    | STM1223 | STY1263 | ATGATCG TTATCGG ATGATCG    | 1 |
| 2021 | CHIP2353 | STM/STY    | STM1326 | STY1785 | ATGGTAC TTATTGC(ATGGTAC    | 1 |
| 2022 | CHIP3622 | STM/STY    | STM4370 | STY4727 | ATGGCAT TTATTCC' ATGGCAT   | 1 |
| 2023 | CHIP2339 | STM/STY    | STM1226 | STY1266 | ATGGGAC TTAATTG' ATGGGAC   | 1 |
| 2024 | CHIP0280 | STM/STY    | STM0021 | STY0024 | ATGAAAA TTAGGAA ATGAAAA    | 1 |
| 2025 | CHIP3904 | STM/STY    | STM1297 | STY1817 | ATGTCCA TTAACGA ATGTCCA    | 1 |
| 2026 | CHIP3920 | STM/STY    | STM1335 | STY1776 | ATGCCAA TTATGCG ATGCCAA    | 1 |
| 2027 | CHIP3952 | STM/STY    | STM1429 | STY1693 | ATGTGGT TTAATCC(ATGTGGT    | 1 |
| 2028 | CHIP0545 | STM/STY    | STM3560 | STY4252 | ATGGAAA TTAACCG ATGGAAA    | 1 |
| 2029 | CHIP0531 | STM/STY    | STM0112 | STY0131 | ATGTCGA TTACACC(ATGTCGA    | 1 |
| 2030 | CHIP0555 | STM/STY    | STM0689 | STY0727 | ATGGCAC TTAGGCT ATGGCAC    | 1 |
| 2031 | CHIP0571 | STM/STY    | STM4231 | STY4427 | ATGATGA TTACCAC(ATGATGA    | 1 |
| 2032 | CHIP1422 | STM/STY    | STM3883 | STY3895 | ATGACAA TTAAGTA ATGACAA    | 1 |
| 2033 | CHIP1350 | STM/STY    | STM0203 | STY0225 | ATGAAAA TTAAGTA ATGAAAA    | 1 |
| 2034 | CHIP1462 | STM/STY    | STM0452 | STY0494 | ATGATGG TTAAGTA ATGATGG    | 1 |
| 2035 | CHIP1464 | STM/STY    | STM0403 | STY0441 | ATGAATT TTACAGC ATGAATT    | 1 |
| 2036 | CHIP1480 | STM/STY    | STM4242 | STY4438 | ATGAACA TTAGAAT(GTGAACA    | 1 |
| 2037 | CHIP1496 | STM/STY    | STM2372 | STY2603 | ATGACAG TTAACCG ATGACAG    | 1 |
| 2038 | CHIP3917 | STM/STY    | STM1324 | STY1787 | ATGTGGC TTATACC(ATGTGGC    | 1 |
| 2039 | CHIP3933 | STM specil | STM1355 |         | ATGTATC, TTAGGTA ATGTATC,  | 1 |
| 2040 | CHIP3973 | STM/STY    | STM1472 | STY1650 | ATGATCA TTATTGT(ATGATCA    | 1 |
| 2041 | CHIP3991 | STM/STY    | STM2079 | STY2288 | ATGACAG TTACAAG ATGACAG    | 1 |
| 2042 | CHIP1419 | STM/STY    | STM3851 | STY3932 | ATGAGGC TTAGTGT ATGAGGC    | 1 |
| 2043 | CHIP1355 | STM/STY    | STM0221 | STY0244 | ATGTTGT TTAGGCT ATGTTGT    | 1 |
| 2044 | CHIP1371 | STM/STY    | STM2060 | STY2265 | ATGCGTG TTATTTG(GTGCCTG    | 1 |
| 2045 | CHIP1387 | STM/STY    | STM0125 | STY0145 | ATGTTAG TTAACGT, ATGTTAG   | 1 |
| 2046 | CHIP1499 | STM/STY    | STM2362 | STY2592 | ATGTGCG TTAGCCT ATGTGCG    | 1 |
| 2047 | CHIP2061 | STM/STY    | STM3568 | STY4243 | ATGACCA TTACGCT ATGACCA    | 1 |
| 2048 | CHIP3225 | STM/STY    | STM3282 | STY3463 | ATGCTTA TTAAGTA ATGCTTA    | 1 |
| 2049 | CHIP1526 | STM/STY    | STM2554 | STY2801 | ATGGCAT TTATGAC(ATGGCAT    | 1 |
| 2050 | CHIP1003 | STM specil | STM1018 |         | ATGAATT, TTAATCG(ATGAATT,  | 0 |
| 2051 | CHIP1035 | STM/STY    | STM0226 | STY0249 | ATGCCTT TTAGTCT ATGCCTT    | 1 |
| 2052 | CHIP3138 | STM specil | STM2594 |         | ATGACTG TTATCGC GTGACTG    | 0 |
| 2053 | CHIP2032 | STM/STY    | STM3736 | STY4058 | ATGAAGT TTATCGG ATGAAGT    | 1 |
| 2054 | CHIP2048 | STM/STY    | STM3627 | STY4171 | ATGGCGT TTATAGT(ATGGCGT    | 1 |
| 2055 | CHIP2064 | STM/STY    | STM3553 | STY4258 | ATGAGTA TTAAGTA ATGAGTA    | 1 |
| 2056 | CHIP2080 | STM/STY    | STM3742 | STY4050 | ATGTATC TTAGTTT(TTGTATC    | 1 |
| 2057 | CHIP1521 | STM/STY    | STM2345 | STY2575 | ATGTCGA TTAGCAG ATGTCGA    | 1 |
| 2058 | CHIP1545 | STM/STY    | STM2557 | STY2804 | ATGCAGC TTAATCT ATGCAGC    | 1 |
| 2059 | CHIP0992 | STM/STY    | STM2438 | STY2676 | ATGAAGA TTAAGTA ATGAAGA    | 1 |
| 2060 | CHIP1016 | STM/STY    | STM0830 | STY0868 | ATGAAGT TTATTTAC ATGAAGT   | 1 |
| 2061 | CHIP1595 | STM/STY    | STM0583 | STY0626 | ATGGCGC TTATTGT(ATGGCGC    | 1 |
| 2062 | CHIP2003 | STM/STY    | STM4465 | STY4803 | ATGGTTA TTAGTCG ATGGTTA    | 1 |
| 2063 | CHIP3167 | STM/STY    | STM2643 | STY2836 | ATGACTG TTAAGTA ATGACTG    | 1 |
| 2064 | CHIP3183 | STM/STY    | STM3195 | STY3373 | ATGAATC TTAGCTG ATGAATC,   | 1 |
| 2065 | CHIP0603 | STM/STY    | STM4248 | STY4444 | ATGTTTC, TTACATG, GTGTTTC, | 1 |
| 2066 | CHIP0715 | STM/STY    | STM2549 | STY2795 | ATGTCAC TTAATCG(ATGTCAC    | 1 |
| 2067 | CHIP0731 | STM/STY    | STM2071 | STY2280 | ATGTTAG TTACTCC, ATGTTAG,  | 1 |
| 2068 | CHIP0763 | STM/STY    | STM0549 | STY0596 | ATGAAAC TTACAAT ATGAAAC    | 1 |
| 2069 | CHIP1822 | STM/STY    | STM4026 | STY3852 | ATGCTCT, TTAGCAT, ATGCTCT, | 1 |



|      |          |            |         |          |                          |   |
|------|----------|------------|---------|----------|--------------------------|---|
| 2070 | CHIP1854 | STM/STY    | STM0880 | STY0913  | ATGAATA TTAGCCG ATGAATA  | 1 |
| 2071 | CHIP0662 | STM/STY    | STM0709 | STY0749  | ATGCCCA TTACGCC ATGCCCA  | 1 |
| 2072 | CHIP1809 | STM/STY    | STM4067 | STY3803  | ATGCACG TTACCCT ATGCACG  | 1 |
| 2073 | CHIP1841 | STM/STY    | STM0681 | STY0719  | ATGACCA TTAGATA ATGACCA  | 1 |
| 2074 | CHIP1873 | STM/STY    | STM0728 | STY0771  | ATGCCTG TTATTTCT ATGCCTG | 1 |
| 2075 | CHIP0679 | STM/STY    | STM4105 | STY3761  | ATGAGCT TTATAAAC ATGAGCT | 1 |
| 2076 | CHIP0615 | STM/STY    | STM4266 | STY4464  | ATGGAAA TTAATCA ATGGAAA  | 1 |
| 2077 | CHIP0449 | STM/STY    |         |          | ATGGTGA TTATATC GTGGTGA  | 0 |
| 2078 | CHIP0465 | STM/STY    | STM2556 | STY2803  | ATGCTTG TTACAGC ATGCTTG  | 1 |
| 2079 | CHIP4673 | STM/STY    | STM0155 | STY0178  | ATGAAAC TTAGCCC ATGAAAC  | 1 |
| 2080 | CHIP0122 | STM/STY    | STM4164 | STY3721  | ATGTCTA TTAGGCT ATGTCTA  | 1 |
| 2081 | CHIP0138 | STM/STY    | STM4023 | STY3855  | ATGGCAG TTAATTT ATGGCAG  | 1 |
| 2082 | CHIP4737 | STM specil | STM4069 |          | ATGTCGC TTACAGC ATGTCGC  | 1 |
| 2083 | CHIP0388 | STM/STY    | STM2878 | STY3001  | ATGCTAA TTAGCTT ATGCTAA  | 1 |
| 2084 | CHIP0404 | STM/STY    | STM1192 | STY1231  | ATGGGGC TTATCTG ATGGGGC  | 1 |
| 2085 | CHIP1255 | STM/STY    | STM1702 | STY1350  | ATGTTTC TTACGCT ATGTTTC  | 1 |
| 2086 | CHIP1287 | STM/STY    | STM2662 | STY2851  | ATGGCAC TTATAAC ATGGCAC  | 1 |
| 2087 | CHIP1303 | STM/STY    | STM0049 | STY0058  | ATGCAGA TTATTCG ATGCAGA  | 1 |
| 2088 | CHIP4684 | STM/STY    | STM1024 | STY1038  | ATGAAAA TTACGCT ATGAAAA  | 1 |
| 2089 | CHIP1313 | STM/STY    | STM3775 | STY4009  | ATGCGAT TTAATCA ATGCGAT  | 1 |
| 2090 | CHIP4694 | STM/STY    | STM1410 | STY1710  | ATGTTGC TTATAGC GTGTTGC  | 1 |
| 2091 | CHIP0135 | STM/STY    | STM1729 | STY1322  | ATGAATA TTATTTCT ATGAATA | 1 |
| 2092 | CHIP4734 | STM specil | STM2725 |          | ATGAGAT TTATGCA ATGAGAT  | 0 |
| 2093 | CHIP4357 | STM/STY    | STM0420 | STY0459  | ATGATGA TTAATAA ATGACCA  | 1 |
| 2094 | CHIP0399 | STM/STY    | STM1659 | STY1405  | ATGCTGA TTATAAT ATGCTGA  | 1 |
| 2095 | CHIP2866 | STM/STY    | STM1760 | STY1292  | ATGTCAA TTAATTC TCAAAAA  | 1 |
| 2096 | CHIP1708 | STM/STY    | STM1825 | STY1955  | ATGGATA TTAGGGC GTGGATA  | 1 |
| 2097 | CHIP1724 | STM/STY    | STM1767 | STY1285  | ATGAATA TTAATAA ATGAATA  | 1 |
| 2098 | CHIP1740 | STM/STY    | STM2995 | STY3133  | ATGCCCC TTATTCA ATGCCCC  | 1 |
| 2099 | CHIP1756 | STM/STY    | STM2930 | STY3055  | ATGGCAG TTATGCT ATGGCAG  | 1 |
| 2100 | CHIP1772 | STM/STY    | STM2919 | STY3044  | ATGATAC TTATTGT TTGATAC  | 1 |
| 2101 | CHIP0377 | STM/STY    | STM1114 | STY1150  | ATGATGA TTATTGG ATGATGA  | 1 |
| 2102 | CHIP0759 | STM/STY    | STM0088 | STY0103  | ATGGCAA TTAGGCG ATGGCAA  | 1 |
| 2103 | CHIP0052 | STM/STY    | STM3930 | STY3625  | ATGGCAG TTATTCC ATGGCAG  | 1 |
| 2104 | CHIP0068 | STM/STY    | STM3913 | STY3641  | ATGAATT TTAGCGA ATGAATT  | 1 |
| 2105 | CHIP0092 | STM/STY    | STM4151 | STY3734  | ATGGCTT TTACGCA ATGGCTT  | 1 |
| 2106 | CHIP1711 | STM/STY    | STM1815 | STY1945  | ATGGCAC TTATCCT ATGGCAC  | 1 |
| 2107 | CHIP1705 | STM/STY    | STM1841 | STY1971  | ATGCGTT TTAGCCA ATGCGTT  | 1 |
| 2108 | CHIP0894 | STM/STY    | STM1920 | STY2129  | ATGACCG TTACGCG ATGACCG  | 1 |
| 2109 | CHIP0910 | STM/STY    | STM4190 | STY4407  | ATGGAAC TTAATAA ATGGAAC  | 1 |
| 2110 | CHIP0934 | STM/STY    | STM0432 | STY0471  | ATGATGA TTACCCC ATGATGA  | 1 |
| 2111 | CHIP1785 | STM/STY    | STM4043 | STY3831  | ATGATCC TTAATGC ATGATCC  | 1 |
| 2112 | CHIP0023 | STM/STY    | STM3964 | STY3595  | ATGATCG TTACAGG ATGATCG  | 0 |
| 2113 | CHIP4464 | STM/STY    | STM0610 | STY0658  | ATGGATT TTAATCA ATGGATT  | 1 |
| 2114 | CHIP2856 | STM/STY    | STM1733 | STY1318  | ATGAGCC TTAATTT ATGAGCC  | 1 |
| 2115 | CHIP2776 | STM/STY    | STM1577 | STY1488  | ATGAGTA TTATTTT ATGAGTA  | 1 |
| 2116 | CHIP2792 | STM/STY    | STM1609 | STY1455  | ATGCGTA TTACGAA ATGCGTA  | 1 |
| 2117 | CHIP2808 | STM/STY    | STM1631 | STY1439a | ATGCCAT TTATTCA ATGCCAT  | 1 |
| 2118 | CHIP2832 | STM/STY    | STM1670 | STY1394  | ATGGCTT TTAGCGA ATGGCTT  | 1 |
| 2119 | CHIP4387 | STM/STY    | STM0476 | STY0520  | ATGAACA TTAAGAC ATGAACA  | 1 |
| 2120 | CHIP1143 | STM/STY    | STM1543 | STY1519  | ATGAAAA TTAATGA ATGAAAA  | 1 |
| 2121 | CHIP1159 | STM/STY    | STM1527 | STY1534  | ATGACAG TTAGGTC ATGACAG  | 1 |

|      |          |            |         |         |                          |   |
|------|----------|------------|---------|---------|--------------------------|---|
| 2122 | CHIP1183 | STM/STY    | STM0979 | STY0979 | ATGAAAA TTACTTTTATGAAAA  | 1 |
| 2123 | CHIP4467 | STM/STY    | STM0615 | STY0663 | ATGAAAG TTAGACA ATGAAAG  | 1 |
| 2124 | CHIP2859 | STM/STY    | STM1740 | STY1311 | ATGGAAA TTATTTCGATGGAAA  | 1 |
| 2125 | CHIP2757 | STM specil | STM1550 |         | ATGACTT TTAGCTT(ATGACTT, | 1 |
| 2126 | CHIP2773 | STM specil | STM1571 |         | ATGGTTG TTAGCGCATGGTTG   | 1 |
| 2127 | CHIP2789 | STM/STY    | STM1604 | STY1460 | ATGCGCC TTAACGATGCGCC    | 1 |
| 2128 | CHIP2813 | STM/STY    | STM1638 | STY1433 | ATGAAGC TTACGATATGAAGC   | 0 |
| 2129 | CHIP2933 | STM specil | STM1896 |         | ATGGCCA TTATTGG ATGGCCA  | 1 |
| 2130 | CHIP1130 | STM/STY    | STM1878 | STY2084 | ATGTTGC TTATTGT(ATGTTGC  | 1 |
| 2131 | CHIP4200 | STM/STY    | STM2973 | STY3112 | ATGGCGA TTACCAG ATGGCGA  | 1 |
| 2132 | CHIP4224 | STM/STY    | STM3021 | STY3166 | ATGCAAC TTATGCAATGCAAC   | 1 |
| 2133 | CHIP4240 | STM/STY    | STM3062 | STY3218 | ATGGCAA TTAGTAC ATGGCAA  | 1 |
| 2134 | CHIP4256 | STM/STY    | STM3093 | STY3246 | ATGTACC TTAGCTC ATGTACC  | 1 |
| 2135 | CHIP4368 | STM/STY    | STM0445 | STY0487 | ATGATGG TTAACGG ATGATGG  | 1 |
| 2136 | CHIP2464 | STM/STY    | STM3581 | STY4230 | ATGATAG TTACGAC ATGATAG  | 1 |
| 2137 | CHIP2482 | STM/STY    | STM3618 | STY4182 | ATGTGTG TTAACA ATGTGTG   | 1 |
| 2138 | CHIP2506 | STM/STY    | STM3676 | STY4120 | ATGCGTA TTAACAT(ATGCGTA  | 1 |
| 2139 | CHIP2522 | STM/STY    | STM3704 | STY4091 | ATGTCGG TTATTCC ATGTCGG  | 1 |
| 2140 | CHIP4195 | STM/STY    | STM2961 | STY3099 | ATGACAA TTAGTGA ATGACAA  | 1 |
| 2141 | CHIP4211 | STM/STY    | STM2991 | STY3129 | ATGTCGG TTAACCT(ATGTCGG  | 1 |
| 2142 | CHIP4235 | STM/STY    | STM3040 | STY3196 | ATGTCTG TTATTTCT ATGTCTG | 1 |
| 2143 | CHIP2469 | STM/STY    | STM3588 | STY4215 | ATGGAAA TTAGCGT GTGGAAA  | 1 |
| 2144 | CHIP4605 | STM/STY    | STM2981 | STY3121 | ATGACCA TTATTCAATGACCA   | 1 |
| 2145 | CHIP4621 | STM/STY    | STM4312 |         | ATGGATA TTAGGCA ATGGATA  | 1 |
| 2146 | CHIP2533 | STM specil | STM3745 |         | ATGAAAA TTATTTCGATGAAAA  | 1 |
| 2147 | CHIP4294 | STM/STY    | STM3177 | STY3354 | ATGCGAA TTATGCG ATGCGAA  | 1 |
| 2148 | CHIP4222 | STM/STY    | STM3016 | STY3160 | ATGGTCT TTACACG ATGGTCT  | 1 |
| 2149 | CHIP1644 | STM/STY    | STM2214 | STY2450 | ATGGTCA TTAACCTGATGGTCA  | 1 |
| 2150 | CHIP1660 | STM/STY    | STM2096 | STY2306 | ATGAATA TTAGATG ATGAATA  | 1 |
| 2151 | CHIP1676 | STM/STY    | STM2158 | STY2388 | ATGATTA TTACAGG ATGATTA  | 1 |
| 2152 | CHIP1892 | STM/STY    | STM0940 | STY0936 | ATGTCGC TTAGCGT ATGTCGC  | 1 |
| 2153 | CHIP2100 | STM/STY    | STM3662 | STY4136 | ATGTTTG TTACAAC ATGTTTG  | 1 |
| 2154 | CHIP1932 | STM/STY    | STM4317 | STY4517 | ATGCCAG TTATTTTATGCCAG   | 1 |
| 2155 | CHIP2086 | STM/STY    | STM3706 | STY4089 | ATGCCTC TTAATCT(TTGCCTC  | 1 |
| 2156 | CHIP2110 | STM/STY    | STM3596 | STY4206 | ATGCTCA TTAACCT(ATGCTCA  | 1 |
| 2157 | CHIP2126 | STM/STY    | STM3503 | STY4293 | ATGAAAA TTATTTG ATGAAAA  | 1 |
| 2158 | CHIP2142 | STM/STY    | STM3295 | STY3473 | ATGAAAC TTAACCT ATGAAAC  | 1 |
| 2159 | CHIP1974 | STM/STY    | STM4569 | STY4920 | ATGAAAC TTACAGC ATGAAAC  | 1 |
| 2160 | CHIP4483 | STM specil | STM0351 |         | ATGAAAT TTATGCT ATGAAAT  | 1 |
| 2161 | CHIP2144 | STM/STY    | STM3284 | STY3465 | ATGAGTC TTACGCT ATGAGTC  | 1 |
| 2162 | CHIP2160 | STM/STY    | STM3185 | STY3363 | ATGCGTA TTATTTTATGCGTA   | 1 |
| 2163 | CHIP2176 | STM/STY    | STM3107 | STY3262 | ATGATGC TTACTTC ATGATGC  | 1 |
| 2164 | CHIP1617 | STM/STY    | STM2817 | STY2943 | ATGCCAT TTAATAATGCCAT    | 1 |
| 2165 | CHIP4517 | STM/STY    | STM2181 | STY2411 | ATGAGTA TTATTTTATGAGTA   | 1 |
| 2166 | CHIP4533 | STM/STY    | STM2220 | STY2456 | ATGAATA(TTAAAAAGTGAATA   | 1 |
| 2167 | CHIP4535 | STM/STY    | STM2222 | STY2459 | ATGCGAC TTAGCCG ATGCGAC  | 1 |
| 2168 | CHIP1675 | STM/STY    | STM2154 | STY2383 | ATGAACG TTACACC ATGAACG  | 1 |
| 2169 | CHIP4575 | STM/STY    | STM2407 | STY2648 | ATGTTCA TTAGTGA ATGTTCA  | 1 |
| 2170 | CHIP1907 | STM/STY    | STM3425 | STY4373 | ATGTCTC TTAACCT ATGTCTC  | 1 |
| 2171 | CHIP1923 | STM/STY    | STM3472 | STY4324 | ATGCTCA TTATGGC ATGCTCA  | 1 |
| 2172 | CHIP1939 | STM/STY    | STM4363 | STY4720 | ATGGCGT TTATTCC ATGGCGT  | 1 |
| 2173 | CHIP0331 | STM/STY    | STM3762 | STY4024 | ATGAATA TTAATCA ATGAATA  | 1 |

|      |          |              |         |         |                          |   |
|------|----------|--------------|---------|---------|--------------------------|---|
| 2174 | CHIP2238 | STM/STY      | STM3157 | STY3330 | ATGTCTC TTAGCCT ATGTCTC  | 1 |
| 2175 | CHIP2262 | STM/STY      | STM3060 | STY3216 | ATGTCTG TTATTCA ATGTCTG  | 1 |
| 2176 | CHIP3362 | STM/STY      | STM0782 | STY0815 | ATGATAC TTAGCGCATGATAC   | 1 |
| 2177 | CHIP3394 | STM/STY      | STM0822 | STY0858 | ATGGATT TTATTTCG ATGGATT | 1 |
| 2178 | CHIP0292 | STM/STY      | STM2679 | STY2866 | ATGACCG TTAGCTCC ATGACCG | 1 |
| 2179 | CHIP0382 | STM/STY      | STM2081 | STY2290 | ATGTCCA TTATTCC ATGTCCA  | 1 |
| 2180 | CHIP3357 | STM/STY      | STM0773 | STY0806 | ATGCTAA TTAGAAC GTGCTAA  | 1 |
| 2181 | CHIP3389 | STM/STY      | STM0817 | STY0852 | ATGAGTG TTAGCTCA ATGAGTG | 1 |
| 2182 | CHIP3421 | STM/STY      | STM0862 | STY0895 | ATGATTA TTAGGTC ATGATTA  | 1 |
| 2183 | CHIP2202 | STM/STY      | STM3314 | STY3493 | ATGCTTT TTATCCA ATGCTTT  | 1 |
| 2184 | CHIP2226 | STM/STY      | STM3222 | STY3402 | ATGCTCT TTAGCTGG ATGCTCT | 1 |
| 2185 | CHIP4325 | STM/STY      | STM4313 | STY4513 | ATGGTAG TTAATTG GTGGTAG  | 1 |
| 2186 | CHIP1447 | STM/STY      | STM0366 | STY0398 | ATGAAAA TTATTTCT ATGAAAA | 1 |
| 2187 | CHIP1440 | STM/STY      | STM2576 | STY2822 | ATGGCGC TTACAGT ATGGCGC  | 1 |
| 2188 | CHIP0462 | STM specil   | STM2635 |         | ATGAGCA TTACGCC ATGAGCA  | 1 |
| 2189 | CHIP0650 | STM/STY      | STM4459 | STY4799 | ATGACAC TTAGTTG ATGACAC  | 1 |
| 2190 | CHIP1574 | STM/STY      | STM0586 | STY0629 | ATGAAAG TTAAGC ATGAAAG   | 1 |
| 2191 | CHIP1803 | STM/STY      | STM4121 | STY3752 | ATGTTGA TTAATA ATGTTGA   | 1 |
| 2192 | CHIP1941 | STM/STY      | STM4365 | STY4722 | ATGAATT TTAGCCA ATGAATT  | 1 |
| 2193 | CHIP0985 | STM/STY      | STM1388 | STY1732 | ATGACAA TTATGAC ATGACAA  | 1 |
| 2194 | CHIP1034 | STM/STY      | STM3384 | STY3564 | ATGCGCA TTACGCA ATGCGCA  | 1 |
| 2195 | CHIP3540 | STM specil   | STM4198 |         | ATGAGTC TTAACAA ATGAGTC  | 1 |
| 2196 | CHIP3572 | STM/STY      | STM4250 | STY4446 | ATGTGGT TTATTCC ATGTGGT  | 1 |
| 2197 | CHIP1205 | STM/STY      | STM2736 | STY4642 | ATGTTTG TTAGATC ATGTTTG  | 1 |
| 2198 | CHIP4085 | STM/STY      | STM2787 | STY2907 | ATGATGA TTAACTC ATGATGA  | 1 |
| 2199 | CHIP4094 | STM/STY      | STM3995 | STY3885 | ATGAAAT TTAGCTC ATGAAAT  | 1 |
| 2200 | CHIP4160 | STM/STY      | STM2904 | STY3026 | ATGAAAA TTATTTCT ATGAAAA | 1 |
| 2201 | CHIP4138 | STM specil   | STM4116 |         | ATGGCAG TTAGCTCC ATGGCAG | 1 |
| 2202 | CHIP4180 | STM/STY      | STM2932 | STY3057 | ATGCGTA TTACCCT ATGCGTA  | 1 |
| 2203 | CHIP3965 | STM/STY      | STM1461 | STY1661 | ATGACTG TTATTGC ATGACTG  | 1 |
| 2204 | CHIP3990 | STM/STY      | STM1503 | STY1560 | ATGAACA TTAGGGC ATGAACA  | 1 |
| 2205 | CHIP0184 | STM/STY      | STM2045 | STY2250 | ATGAATA TTAGGCT ATGAATA  | 1 |
| 2206 | CHIP0234 | STM/STY      | STM4394 | STY4750 | ATGCAAG TTAGCTC ATGCAAG  | 1 |
| 2207 | CHIP0220 | STM/STY      | STM3444 | STY4354 | ATGTACG TTAGGCG ATGTACG  | 1 |
| 2208 | CHIP1335 | STM/STY      | STM0307 | STY0352 | ATGAAAA TTAGCTCA ATGAAAA | 1 |
| 2209 | CHIP2889 | STM/STY      | STM1813 | STY1943 | ATGAGGC TTAACGG TTGAGGC  | 1 |
| 2210 | CHIP2874 | STM/STY      | STM1782 | STY1908 | ATGAAAC TTAGCTA ATGAAAC  | 1 |
| 2211 | CHIP2914 | STM/STY      | STM1857 | STY1991 | ATGGACA TTATAAA ATGGACA  | 1 |
| 2212 | CHIP2924 | STM/STY      | STM1881 | STY2087 | ATGAATA TTAGCGG ATGAATA  | 1 |
| 2213 | CHIP2902 | STM/STY      | STM1839 | STY1969 | ATGAACG TTATCGT ATGAACG  | 1 |
| 2214 | CHIP4719 | STM/STY      | STM2209 | STY2445 | ATGTGTG TTACATC ATGTGTG  | 1 |
| 2215 | CHIP1080 | STM specific |         |         | ATGGCAG TTAAGAG ATGGCAG  | 0 |
| 2216 | CHIP1057 | STM specific |         |         | ATGTTTG TTAGCGG TTGTTTG  | 0 |
| 2217 | CHIP1089 | STM specil   | PSLT079 |         | ATGGAAC TTATTTT ATGGAAC  | 1 |
| 2218 | CHIP0651 | STM specil   | PSLT038 |         | ATGCCA TTAGCTC ATGCCA    | 1 |
| 2219 | CHIP1074 | STM specific |         |         | ATGTCCC TTAGCGG ATGTCCC  | 0 |
| 2220 | CHIP1114 | STM specil   | PSLT106 |         | ATGCTGA TTAGCTC ATGCTGA  | 0 |
| 2221 | CHIP0951 | none         | R460025 |         | ATGCCAA TTAGCGC ATGCCAA  | 0 |
| 2222 | CHIP4875 | none         | R460010 |         | ATGACCA TTAGCTT ATGACCA  | 0 |
| 2223 | CHIP4902 | none         | R460055 |         | ATGAAAT TTAGGTC ATGAAAT  | 0 |
| 2224 | CHIP4890 | none         | R460035 |         | ATGCTGA TTATTCA ATGCTGA  | 0 |
| 2225 | CHIP4884 | none         | R460020 |         | ATGACTG TTAGAGG ATGACTG  | 0 |

|      |          |              |         |         |                           |   |
|------|----------|--------------|---------|---------|---------------------------|---|
| 2226 | CHIP4871 | none         | R460005 |         | ATGAAGA TTATAAG(ATGAAGA   | 0 |
| 2227 | CHIP4803 | STM specific |         |         | CGCCGAT TAAATGC(CGCCGAT   | 0 |
| 2228 | CHIP4807 | STM specil   | STM2590 |         | CCAGTGC CAACCTG(CCAGTGC   | 1 |
| 2229 | CHIP4811 | STM/STY      |         |         | TCGGTTT CAGAGAG(TCGGTTT   | 0 |
| 2230 | CHIP4815 | STM specific |         |         | GCTGTAC CCGGATG(GCTGTAC   | 0 |
| 2231 | CHIP4819 | STM specil   | STM1010 |         | CATTAATAGTGGTT(CATTAAT    | 0 |
| 2232 | CHIP4823 | STM/STY      |         |         | ATAGCGC GGCCGC(ATAGCGC    | 0 |
| 2233 | CHIP5197 | STY specific |         | STY3188 | ATGACGA TTAGCTT(ATGACGA   | 0 |
| 2234 | CHIP5127 | STY specific |         | STY2068 | ATGAACG TTATACC(ATGAACG   | 0 |
| 2235 | CHIP5143 | STY specific |         | STY2298 | ATGAAGC TTATATAC(ATGAAGC  | 0 |
| 2236 | CHIP5247 | STY specific |         | STY3685 | ATGAACA TTAGCCA GTGAACA   | 0 |
| 2237 | CHIP5262 | STY specific |         | STY3764 | ATGAATT TTATTGG ATGAATT   | 0 |
| 2238 | CHIP5005 | STM/STY      |         | STY1293 | ATGACGC TTATTTCA/ATGACGC  | 0 |
| 2239 | CHIP5219 | STM/STY      |         |         | ATGATGG TTAGCAG ATGATGG   | 0 |
| 2240 | CHIP5234 | STY specific |         | STY3671 | ATGAAGA TTATTTAC(ATGAAGA  | 0 |
| 2241 | CHIP5249 | STY specific |         | STY3687 | ATGAACG TTATACC(ATGAACG   | 0 |
| 2242 | CHIP5264 | STY specific |         | STY3845 | ATGAGTA TTACCAT GTGAGTA   | 0 |
| 2243 | CHIP5007 | STY specific |         | STY1360 | ATGAATA TTATACA(GTGAATA   | 0 |
| 2244 | CHIP5023 | STY specific |         | STY1598 | ATGACAC TTATATG/ATGACAC   | 0 |
| 2245 | CHIP5229 | STY specific |         | STY3665 | ATGCGTA TTAGTGG ATGCGTA   | 0 |
| 2246 | CHIP5243 | STY specific |         | STY3681 | ATGACGC TTAACGA ATGACGC   | 0 |
| 2247 | CHIP5258 | STY specific |         | STY3703 | ATGATGA TTAAGA(ATGATGA    | 0 |
| 2248 | CHIP4914 | STY specific |         | STY0202 | ATGGTGA TTATTCA(ATGGTGA   | 0 |
| 2249 | CHIP4930 | STY specific |         | STY0322 | ATGAAAT TTATGGA ATGAAAT   | 0 |
| 2250 | CHIP4946 | STM/STY      |         | STY0478 | ATGGCGA TTATTCT(ATGGCGA   | 0 |
| 2251 | CHIP5245 | STY specific |         | STY3683 | ATGAAAA TTATGCT(ATGAAAA   | 0 |
| 2252 | CHIP5179 | STM/STY      |         | STY2895 | ATGCGGT TTAAGTGTGCGGT     | 0 |
| 2253 | CHIP4916 | STY specific |         | STY0204 | ATGAAAA TTATTGA ATGAAAA   | 0 |
| 2254 | CHIP4932 | STY specific |         | STY0324 | ATGACGA TTAGCCA ATGACGA   | 0 |
| 2255 | CHIP4948 | STY specific |         | STY0480 | ATGCAGC TTAATA/ATGCAGC    | 0 |
| 2256 | CHIP4964 | STY specific |         | STY1029 | ATGGGTC TTAGGAG TTGGGTC   | 0 |
| 2257 | CHIP5284 | STY specific |         | STY4219 | ATGAAAA TTATTTT/ATGAAAA   | 0 |
| 2258 | CHIP5385 | STY specific |         | STY4653 | ATGTTTCG TTATATA1GTGTTTCG | 0 |
| 2259 | CHIP5403 | STY specific |         | STY4679 | ATGATGA TTAATGA ATGATGA   | 0 |
| 2260 | CHIP5419 | STY specific |         | STY4831 | ATGAAAA TTAGTGC ATGAAAA   | 0 |
| 2261 | CHIP5434 | STM/STY      |         | STY4875 | ATGAAAA TTAGTGA ATGAAAA   | 0 |
| 2262 | CHIP5285 | STY specific |         | STY4220 | ATGAAAG TTATTGA(GTGAAG    | 0 |
| 2263 | CHIP5356 | STY specific |         | STY4596 | ATGAGAA TTAATCC ATGAGAA   | 0 |
| 2264 | CHIP5288 | STM/STY      |         | STY4259 | ATGAAAC TTAAGGG ATGAAAC   | 0 |
| 2265 | CHIP5304 | STY specific |         | STY4529 | ATGATGA TTACAGT GTGATGA   | 0 |
| 2266 | CHIP5400 | STY specific |         | STY4675 | ATGAGGT TTACGGA TTGAGGT   | 0 |
| 2267 | CHIP5416 | STY specific |         | STY4828 | ATGCACA TTATACC ATGCACA   | 0 |
| 2268 | CHIP5431 | STY specific |         | STY4853 | ATGACCT TTAATGC ATGACCT   | 0 |
| 2269 | CHIP2704 | STM/STY      | STM0190 | STY0215 | ATGGCGC TTAATTG(ATGGCGC   | 1 |
| 2270 | CHIP3304 | STM/STY      | STM0680 | STY0718 | ATGTGTT TTAAGTGG ATGTGTT  | 1 |
| 2271 | CHIP3320 | STM/STY      | STM0702 | STY0743 | ATGACAA TTACGGC GTGACAA   | 1 |
| 2272 | CHIP2577 | STM/STY      | STM3832 | STY3946 | ATGTCGA TTAATAT ATGTCGA   | 1 |
| 2273 | CHIP0810 | STM/STY      | STM2028 | STY2233 | ATGAATA TTAGTGT(ATGAATA   | 1 |
| 2274 | CHIP0826 | STM/STY      | STM3789 | STY3993 | ATGAACA TTAACG ATGAACA    | 1 |
| 2275 | CHIP2587 | STM specil   | STM3845 |         | ATGTTTG TTAATTA/ATGTTTG   | 1 |
| 2276 | CHIP2603 | STM/STY      | STM3877 | STY3901 | ATGAAAA TTATAAA/ATGAAAA   | 1 |
| 2277 | CHIP2627 | STM/STY      | STM0041 | STY0049 | ATGCCAT TTACAAG ATGCCAT   | 1 |

|      |          |              |         |         |                           |   |
|------|----------|--------------|---------|---------|---------------------------|---|
| 2278 | CHIP2659 | STM/STY      | STM0116 | STY0135 | ATGTTTCG TTAGGTC GTGTTTCG | 1 |
| 2279 | CHIP2675 | STM/STY      | STM0149 | STY0171 | ATGGATA TTAGGCT ATGGATA   | 1 |
| 2280 | CHIP2691 | STM specil   | STM0175 |         | ATGCGCA TTACTGG ATGCGCA   | 1 |
| 2281 | CHIP3245 | STM/STY      | STM3328 | STY3507 | ATGAAGC TTATTTTT ATGAAGC  | 1 |
| 2282 | CHIP3261 | STM/STY      | STM3368 | STY3548 | ATGAGTC TTATGCG ATGAGTC   | 1 |
| 2283 | CHIP3277 | STM/STY      | STM0629 | STY0678 | ATGTCTA TTACAGA ATGTCTA   | 1 |
| 2284 | CHIP3293 | STM specil   | STM0654 |         | ATGAATC TTAAGCG ATGAATC   | 1 |
| 2285 | CHIP3309 | STM/STY      | STM0686 | STY0724 | ATGAGTG TTAAGCG ATGAGTG   | 1 |
| 2286 | CHIP3325 | STM/STY      | STM0712 | STY0752 | ATGCAGC TTAGCAT GTGCAGC   | 1 |
| 2287 | CHIP2727 | STM/STY      | STM0242 | STY0269 | ATGCGTA TTAGCCC ATGCGTA   | 1 |
| 2288 | CHIP2751 | STM/STY      | STM1541 | STY1521 | ATGCTAA TTAGCCG ATGCTAA   | 1 |
| 2289 | CHIP4008 | STM/STY      | STM2113 | STY2326 | ATGAATA TTACAGA ATGAATA   | 1 |
| 2290 | CHIP3736 | STM/STY      | STM4591 | STY4938 | ATGGGCC TTAGTTA GTGGGCC   | 1 |
| 2291 | CHIP3752 | STM specil   | STM0278 |         | ATGGATA TTAAGCG ATGGATA   | 1 |
| 2292 | CHIP3776 | STM/STY      | STM0321 | STY0366 | ATGAGTG TTATCGA ATGAGTG   | 1 |
| 2293 | CHIP4026 | STM specil   | STM2707 |         | ATGAATA TTATGGA ATGAATA   | 1 |
| 2294 | CHIP3754 | STM/STY      | STM0283 |         | ATGATGA TTATATA ATGATGA   | 1 |
| 2295 | CHIP4066 | STM specil   | STM2759 |         | ATGAGTA TTATTCG ATGAGTA   | 1 |
| 2296 | CHIP4082 | STM/STY      | STM2781 | STY2899 | ATGACGA TTACCGG ATGACGA   | 1 |
| 2297 | CHIP3810 | STM/STY      | STM1087 | STY1115 | ATGCTTC TTATTTA ATGCTTC   | 1 |
| 2298 | CHIP3826 | STM/STY      | STM1111 | STY1147 | ATGGCTA TTAGGGA ATGGCTA   | 1 |
| 2299 | CHIP4076 | STM specil   | STM2769 |         | ATGAAGT TTAAGCG ATGAAGT   | 0 |
| 2300 | CHIP4092 | STM/STY      | STM2798 | STY2918 | ATGTCCA TTAATGA ATGTCCA   | 1 |
| 2301 | CHIP3820 | STM/STY      | STM1102 | STY1136 | ATGAAGA TTAAGCG ATGAAGA   | 1 |
| 2302 | CHIP2396 | STM/STY      | STM3453 | STY4345 | ATGAAAT TTATTTT ATGAAAT   | 1 |
| 2303 | CHIP2412 | STM/STY      | STM3489 | STY4307 | ATGAAGG TTAACCA ATGAAGG   | 1 |
| 2304 | CHIP3876 | STM/STY      | STM1236 | STY1276 | ATGAAAC TTAAGCG ATGAAAC   | 1 |
| 2305 | CHIP3822 | STM/STY      | STM1319 | STY1792 | ATGATGA TTAGTCA ATGATGA   | 1 |
| 2306 | CHIP3838 | STM/STY      | STM1147 | STY1184 | ATGACAT TTAGGCA ATGACAT   | 1 |
| 2307 | CHIP3854 | STM/STY      | STM1197 | STY1236 | ATGTCTA TTAGATC GTGTCTA   | 1 |
| 2308 | CHIP3870 | STM/STY      | STM1217 | STY1257 | ATGTATC TTATTCA ATGTATC   | 1 |
| 2309 | CHIP3886 | STM/STY      | STM1267 | STY1854 | ATGACTA TTAGATG ATGACTA   | 1 |
| 2310 | CHIP2462 | STM/STY      | STM3578 | STY4233 | ATGAGCC TTAATGC ATGAGCC   | 1 |
| 2311 | CHIP3521 | STM specil   | STM1030 |         | ATGGATC TTATTCC GTGGATC   | 1 |
| 2312 | CHIP3537 | STM specil   | STM4195 |         | ATGCTCG TTAATTT ATGCTCG   | 1 |
| 2313 | CHIP3561 | STM/STY      | STM4221 | STY4417 | ATGAAAA TTAGGCG ATGAAAA   | 1 |
| 2314 | CHIP3577 | STM/STY      | STM4264 | STY4462 | ATGAGTC TTACCGC ATGAGTC   | 1 |
| 2315 | CHIP3593 | STM/STY      | STM4297 | STY4496 | ATGAGTA TTAGCCG ATGAGTA   | 1 |
| 2316 | CHIP3041 | STM/STY      | STM2376 | STY2607 | ATGAAAA TTAATGC ATGAAAA   | 1 |
| 2317 | CHIP3571 | STM/STY      | STM4249 | STY4445 | ATGAAAA TTAGTAC ATGAAAA   | 1 |
| 2318 | CHIP3587 | STM/STY      | STM4284 | STY4483 | ATGAAAC TTAGCCA ATGAAAC   | 1 |
| 2319 | CHIP3603 | STM/STY      | STM4326 | STY4685 | ATGTCAA TTAAGCG ATGTCAA   | 1 |
| 2320 | CHIP3435 | STM/STY      | STM0890 | STY0923 | ATGAAAA TTAAGCG ATGAAAA   | 1 |
| 2321 | CHIP3459 | STM specil   | STM0916 |         | ATGGGCC TTAAGGG ATGGGCC   | 1 |
| 2322 | CHIP3475 | STM/STY      | STM0937 | STY0933 | ATGTTTT TTACGCG ATGTTTT   | 1 |
| 2323 | CHIP4110 | STM/STY      | STM4066 | STY3804 | ATGAAGG TTATTTT ATGAAGG   | 1 |
| 2324 | CHIP3558 | STM specil   | STM4217 |         | ATGCGTT TTAATGA ATGCGTT   | 1 |
| 2325 | CHIP4158 | STM specil   | STM2902 |         | ATGGACA TTAATCA ATGGACA   | 1 |
| 2326 | CHIP3606 | STM/STY      | STM4332 | STY4692 | ATGGCCT TTAGCGT ATGGCCT   | 1 |
| 2327 | CHIP3430 | STM/STY      | STM0878 | STY0911 | ATGAATG TTATACC GTGAATG   | 1 |
| 2328 | CHIP3454 | STM specific |         |         | ATGAATT TTAGCGC ATGAATT   | 0 |
| 2329 | CHIP0233 | STM/STY      | STM0202 | STY0223 | ATGAGTA TTACAGT ATGAGTA   | 1 |

|      |          |            |         |         |                 |         |   |
|------|----------|------------|---------|---------|-----------------|---------|---|
| 2330 | CHIP0249 | STM/STY    | STM0369 | STY0401 | ATGACAG TTAGCAA | ATGACAG | 1 |
| 2331 | CHIP2356 | STM/STY    | STM1347 | STY1763 | ATGAACA TTAAGA  | ATGAACA | 1 |
| 2332 | CHIP2945 | STM/STY    | STM1935 | STY2143 | ATGCTGA TTAATTT | ATGCTGA | 1 |
| 2333 | CHIP2961 | STM/STY    | STM1993 | STY2201 | ATGGACT TTAAGT  | ATGGACT | 1 |
| 2334 | CHIP2985 | STM/STY    | STM2271 | STY2496 | ATGAAAT TTAATG  | ATGAAAT | 1 |
| 2335 | CHIP3659 | STM specil | STM4433 |         | ATGAAAA TTAAGA  | ATGAAAA | 1 |
| 2336 | CHIP3003 | STM/STY    | STM2310 | STY2541 | ATGCATT TTAACG  | ATGCATT | 1 |
| 2337 | CHIP3019 | STM/STY    | STM2336 | STY2566 | ATGTCGA TTAACA  | ATGTCGA | 1 |
| 2338 | CHIP0196 | STM/STY    | STM2057 | STY2262 | ATGGCCA TTAGGCT | ATGGCCA | 1 |
| 2339 | CHIP0212 | STM/STY    | STM2924 | STY3049 | ATGAGTC TTAAGT  | ATGAGTC | 1 |
| 2340 | CHIP0236 | STM/STY    | STM0206 | STY0228 | ATGGCTA TTAATTC | ATGGCTA | 1 |
| 2341 | CHIP0206 | STM specil | STM2636 |         | ATGGCTA TTAATTC | ATGGCTA | 1 |
| 2342 | CHIP2305 | STM/STY    | STM1340 | STY1770 | ATGGATA TTAACG  | ATGGATA | 1 |
| 2343 | CHIP2321 | STM/STY    | STM1076 | STY1098 | ATGGAAC TTAATTC | ATGGAAC | 1 |
| 2344 | CHIP0262 | STM/STY    | STM2867 | STY2988 | ATGGTAT TTAATG  | ATGGTAT | 1 |
| 2345 | CHIP0278 | STM/STY    | STM4094 | STY3776 | ATGAAAT TTAGGG  | ATGAAAT | 1 |
| 2346 | CHIP2950 | STM/STY    | STM1945 | STY2153 | ATGCAAT TTAAGT  | ATGCAAT | 1 |
| 2347 | CHIP0264 | STM/STY    | STM2898 | STY3021 | ATGAAGA TTAATTA | ATGAAGA | 1 |
| 2348 | CHIP2363 | STM/STY    | STM1431 | STY1691 | ATGTCGT TTAATG  | ATGTCGT | 1 |
| 2349 | CHIP0481 | STM/STY    | STM1144 | STY1181 | ATGAAAC TTAATAC | ATGAAAC | 1 |
| 2350 | CHIP0497 | STM/STY    | STM3726 | STY4068 | ATGCCTG TTAATTC | ATGCCTG | 1 |
| 2351 | CHIP0529 | STM/STY    | STM3716 | STY4079 | ATGATTA TTAAGC  | ATGATTA | 1 |
| 2352 | CHIP3976 | STM/STY    | STM1478 | STY1590 | ATGAAGC TTAATTA | ATGAAGC | 1 |
| 2353 | CHIP3970 | STM/STY    | STM1468 | STY1654 | ATGTCAA TTAACG  | ATGTCAA | 1 |
| 2354 | CHIP3986 | STM/STY    | STM1498 | STY1566 | ATGAAAA TTAACG  | ATGAAAA | 1 |
| 2355 | CHIP1318 | STM/STY    | STM3781 | STY4001 | ATGCCTG TTAATTC | ATGCCTG | 1 |
| 2356 | CHIP1334 | STM/STY    | STM0308 | STY0353 | ATGTCTG TTAACA  | ATGTCTG | 1 |
| 2357 | CHIP1446 | STM/STY    | STM0363 | STY0395 | ATGTCTC TTAACG  | ATGTCTC | 1 |
| 2358 | CHIP1374 | STM/STY    | STM2013 | STY2216 | ATGTTGC TTAATTC | ATGTTGC | 1 |
| 2359 | CHIP1376 | STM/STY    | STM2067 | STY2276 | ATGACAG TTAACA  | ATGACAG | 1 |
| 2360 | CHIP1392 | STM/STY    | STM0133 | STY0153 | ATGTTTG TTAATTC | ATGTTTG | 1 |
| 2361 | CHIP1504 | STM/STY    | STM2323 | STY2553 | ATGCTAA TTAATG  | ATGCTAA | 1 |
| 2362 | CHIP0494 | STM/STY    | STM0317 | STY0362 | ATGAGCC TTAACG  | ATGAGCC | 1 |
| 2363 | CHIP0510 | STM/STY    | STM1980 | STY2188 | ATGACTC TTAATTC | ATGACTC | 1 |
| 2364 | CHIP3981 | STM/STY    | STM1487 | STY1578 | ATGAATA TTAATTC | ATGAATA | 1 |
| 2365 | CHIP0568 | STM/STY    | STM3447 | STY4351 | ATGCCAC TTAACCA | ATGCCAC | 1 |
| 2366 | CHIP1427 | STM/STY    | STM3847 | STY3936 | ATGAAAC TTAAGG  | ATGAAAC | 1 |
| 2367 | CHIP1451 | STM/STY    | STM0387 | STY0420 | ATGACCA TTAATTT | ATGACCA | 1 |
| 2368 | CHIP1467 | STM/STY    | STM0441 | STY0483 | ATGGCAA TTAATTC | ATGGCAA | 1 |
| 2369 | CHIP1483 | STM/STY    | STM4269 | STY4467 | ATGATGC TTAAGT  | ATGATGC | 1 |
| 2370 | CHIP1507 | STM/STY    | STM2312 | STY2543 | ATGATTG TTAATG  | ATGATTG | 1 |
| 2371 | CHIP3209 | STM/STY    | STM3258 | STY3441 | ATGAGCC TTAACCC | ATGAGCC | 1 |
| 2372 | CHIP0963 | STM/STY    | STM4156 |         | ATGTTAC TTAATTT | ATGTTAC | 1 |
| 2373 | CHIP0987 | STM/STY    | STM1381 | STY1741 | ATGAAAA TTAATTT | ATGAAAA | 1 |
| 2374 | CHIP1550 | STM/STY    | STM2512 | STY2753 | ATGTTAT TTAACG  | ATGTTAT | 1 |
| 2375 | CHIP1582 | STM/STY    | STM0500 | STY0546 | ATGATAG TTAACCG | ATGATAG | 1 |
| 2376 | CHIP1998 | STM/STY    | STM4413 | STY4772 | ATGATGA TTAATTT | ATGATGA | 1 |
| 2377 | CHIP3180 | STM/STY    | STM3190 | STY3368 | ATGTCAG TTAACCG | ATGTCAG | 1 |
| 2378 | CHIP3196 | STM/STY    | STM3220 | STY3400 | ATGAGCC TTAATTC | ATGAGCC | 1 |
| 2379 | CHIP3212 | STM/STY    | STM3265 | STY3448 | ATGGCTC TTAATG  | ATGGCTC | 1 |
| 2380 | CHIP3228 | STM specil | STM3291 |         | ATGAGTT TTAATCT | ATGAGTT | 1 |
| 2381 | CHIP0982 | STM/STY    | STM1773 | STY1898 | ATGAGGT TTAATG  | ATGAGGT | 1 |

|      |          |            |         |         |                           |   |
|------|----------|------------|---------|---------|---------------------------|---|
| 2382 | CHIP1006 | STM/STY    | STM2300 | STY2530 | ATGACGA TTATGAG ATGACGA   | 1 |
| 2383 | CHIP1539 | STM/STY    | STM2447 | STY2684 | ATGAAAT(TTAACGA)ATGAAAT(  | 1 |
| 2384 | CHIP1024 | STM/STY    | STM4471 | STY4809 | ATGACGG TTATCCG ATGACGG   | 1 |
| 2385 | CHIP1603 | STM/STY    | STM2794 | STY2914 | ATGACCG TTACATT)ATGACCG   | 1 |
| 2386 | CHIP2011 | STM/STY    | STM4512 | STY4868 | ATGCCTG TTACGCC ATGCCTG   | 1 |
| 2387 | CHIP2027 | STM/STY    | STM4595 | STY4944 | ATGTTTA)TTACTGA' ATGTTTA) | 1 |
| 2388 | CHIP2043 | STM/STY    | STM3656 |         | ATGCAAA TTACTION' ATGCAAA | 1 |
| 2389 | CHIP0611 | STM/STY    | STM1753 | STY1297 | ATGACGC TTATTCC(ATGACGC   | 1 |
| 2390 | CHIP0627 | STM/STY    | STM1693 | STY1368 | ATGATTA' TTATCGT,ATGATTA' | 1 |
| 2391 | CHIP0643 | STM/STY    | STM4048 | STY3825 | ATGACCG TTACTGG ATGACCG   | 1 |
| 2392 | CHIP1798 | STM/STY    | STM3998 | STY3882 | ATGACGA TTACTION)ATGACGA  | 1 |
| 2393 | CHIP1830 | STM/STY    | STM0813 | STY0848 | ATGACTC TTATAGA' ATGACTC  | 1 |
| 2394 | CHIP1862 | STM/STY    | STM0797 | STY0830 | ATGACTA TTAGGCG GTGACTA   | 1 |
| 2395 | CHIP0758 | STM/STY    | STM0089 | STY0104 | ATGATCA TTAGTGA,ATGATCA   | 1 |
| 2396 | CHIP1817 | STM/STY    | STM4040 | STY3836 | ATGAAAA)TTAACGC,ATGAAAA)  | 1 |
| 2397 | CHIP1849 | STM/STY    | STM0641 | STY0692 | ATGAAGC TTACTCA)GTGAAGC   | 1 |
| 2398 | CHIP1881 | STM/STY    | STM0261 | STY0282 | ATGAATC' TTAGAAC)ATGAATC' | 1 |
| 2399 | CHIP0591 | STM/STY    | STM0978 | STY0978 | ATGGAAT TTAGGCA ATGGAAT   | 1 |
| 2400 | CHIP0711 | STM/STY    | STM2355 | STY2585 | ATGAAGA TTAATCG)ATGAAGA   | 1 |
| 2401 | CHIP1284 | STM/STY    | STM2685 | STY2871 | ATGCGCT TTACTTC(ATGCGCT   | 1 |
| 2402 | CHIP1300 | STM/STY    | STM0059 | STY0068 | ATGAAAA' TTATAAC(ATGAAAA' | 1 |
| 2403 | CHIP4681 | STM/STY    | STM0362 | STY0394 | ATGGTCG TTAACCG ATGGTCG   | 1 |
| 2404 | CHIP4705 | STM/STY    | STM1854 | STY1986 | ATGCCGC TTAACCG ATGCCGC   | 1 |
| 2405 | CHIP0146 | STM/STY    | STM3594 | STY4209 | ATGACCA TTAGCCT ATGACCA   | 1 |
| 2406 | CHIP3323 | STM/STY    |         |         | ATGATAA TTATTAG(ATAAACA)  | 0 |
| 2407 | CHIP1223 | STM/STY    | STM4303 | STY4501 | ATGATCA TTACTGA)ATGATCA,  | 1 |
| 2408 | CHIP1239 | STM/STY    | STM1936 | STY2144 | ATGGAAG TTAATGG)ATGGAAG   | 0 |
| 2409 | CHIP1263 | STM/STY    | STM1684 | STY1377 | ATGAGCG TTATTTCT)ATGAGCG  | 1 |
| 2410 | CHIP0460 | STM/STY    | STM2637 | STY2830 | ATGATTA)TTACTGG ATGATTA)  | 1 |
| 2411 | CHIP0476 | STM/STY    | STM1139 | STY1176 | ATGCCGC TTAGGAT ATGCCGC   | 1 |
| 2412 | CHIP0109 | STM/STY    | STM2958 | STY3096 | ATGACCA TTAGCCT,ATGACCA   | 1 |
| 2413 | CHIP4678 | STM/STY    | STM0324 |         | ATGTTCC TTACTGA,TTGTTCC)  | 0 |
| 2414 | CHIP0119 | STM specil | STM4161 |         | ATGCAGA TTAACCC)ATGCAGA   | 1 |
| 2415 | CHIP4718 | STM/STY    | STM3460 | STY4338 | ATGGACC TTATGTG' ATGGACC  | 1 |
| 2416 | CHIP3231 | STM/STY    | STM3297 | STY3475 | ATGGACA TTATTAC)GACAGGT   | 1 |
| 2417 | CHIP0191 | STM/STY    | STM2052 | STY2257 | ATGAATA)TTATAGC,ATGAATA)  | 1 |
| 2418 | CHIP1234 | STM/STY    | STM4279 | STY4477 | ATGAGTT TTATTGG)ATGAGTT)  | 1 |
| 2419 | CHIP0865 | STM/STY    | STM1975 | STY2183 | ATGACTG TTACCGC ATGACTG   | 1 |
| 2420 | CHIP0881 | STM/STY    | STM1512 | STY1549 | ATGTCGA TTAGCGA ATGTCGA   | 1 |
| 2421 | CHIP0897 | STM/STY    | STM4130 | STY3744 | ATGATTA)TTAGAAG ATGATTA)  | 1 |
| 2422 | CHIP0913 | STM/STY    | STM0609 | STY0655 | ATGCTCG TTATGCG ATGCTCG   | 1 |
| 2423 | CHIP0929 | STM/STY    | STM1744 | STY1306 | ATGATGT TTAACGA' ATGATGT  | 1 |
| 2424 | CHIP1780 | STM/STY    | STM4072 | STY3798 | ATGGCTC TTACAGG ATGGCTC   | 1 |
| 2425 | CHIP0020 | STM/STY    | STM3967 | STY3592 | ATGACAA TTAGCCT ATGACAA   | 1 |
| 2426 | CHIP0036 | STM/STY    | STM3951 | STY3608 | ATGGACC TTAACCC)ATGGACC   | 1 |
| 2427 | CHIP1382 | STM/STY    | STM0085 | STY0100 | ATGATTT)TTATATC(ATTTATG)  | 1 |
| 2428 | CHIP2182 | STM/STY    | STM3059 | STY3215 | ATGTCTA' TTAGTGT,TCTATAC) | 1 |
| 2429 | CHIP0868 | STM/STY    | STM1971 | STY2179 | ATGTCTA TTAGAGC ATGTCTA)  | 1 |
| 2430 | CHIP0884 | STM/STY    | STM2430 | STY2666 | ATGAGTA TTACTGT' ATGAGTA  | 1 |
| 2431 | CHIP0878 | STM/STY    | STM2432 | STY2668 | ATGATTT(TTAGCAG ATGATTT)  | 1 |
| 2432 | CHIP1729 | STM/STY    | STM1717 | STY1333 | ATGCATT, TTATTGG)ATGCATT, | 1 |
| 2433 | CHIP1753 | STM/STY    | STM2951 | STY3080 | ATGCAGT TTAGGCG ATGCAGT   | 1 |

|      |          |              |         |         |                          |   |
|------|----------|--------------|---------|---------|--------------------------|---|
| 2434 | CHIP1769 | STM/STY      | STM2949 | STY3077 | ATGTCCA TTATTTCG(ATGTCCA | 1 |
| 2435 | CHIP1793 | STM/STY      | STM4013 | STY3866 | ATGTATA TTAATGA ATGTATA  | 1 |
| 2436 | CHIP0550 | STM/STY      | STM1912 | STY2121 | ATGATGC TTAAGCG ATGCGTA  | 1 |
| 2437 | CHIP1204 | STM/STY      | STM1656 | STY1409 | ATGGAAG TTACAAC(GTGGAAAG | 1 |
| 2438 | CHIP2760 | STM/STY      | STM1554 | STY1509 | ATGATGA TTATTTCTATGATGA  | 1 |
| 2439 | CHIP2880 | STM/STY      | STM1795 | STY1922 | ATGTACC TTAACCT(ATGTACC  | 1 |
| 2440 | CHIP2896 | STM/STY      | STM1830 | STY1959 | ATGACCA TTATTTCTGTGACCA  | 1 |
| 2441 | CHIP2912 | STM/STY      | STM1853 | STY1984 | ATGATGC TTATTGT/ATGATGC  | 1 |
| 2442 | CHIP2936 | STM/STY      | STM1900 | STY2108 | ATGAAGG TTAGGCGGTGAAGG   | 1 |
| 2443 | CHIP1127 | STM/STY      | STM0888 | STY0921 | ATGCTTG TTAATTG(ATGCTTG  | 1 |
| 2444 | CHIP4411 | STM/STY      | STM0520 | STY0568 | ATGAGTG TTAAGCT(ATGAGTG  | 1 |
| 2445 | CHIP1167 | STM/STY      | STM0998 | STY1000 | ATGTTTG TTACAGT/ATGTTTG  | 1 |
| 2446 | CHIP4451 | STM/STY      | STM0589 | STY0632 | ATGCCAT TTAGACT/ATGCCAT  | 1 |
| 2447 | CHIP4475 | STM/STY      | STM0338 | STY0371 | ATGTCCC TTATTCC ATGTCCC  | 1 |
| 2448 | CHIP2763 | STM/STY      | STM1557 | STY1507 | ATGGATT TTATCCG ATGGATT  | 1 |
| 2449 | CHIP2861 | STM/STY      | STM1746 | STY1304 | ATGATAG TTAATGT GTGATAG  | 1 |
| 2450 | CHIP2877 | STM/STY      | STM1786 | STY1913 | ATGAATA TTATGCC ATGAATA  | 1 |
| 2451 | CHIP2893 | STM/STY      | STM1827 | STY1957 | ATGGGCC TTATAGA ATGGGCC  | 1 |
| 2452 | CHIP2821 | STM/STY      | STM1651 | STY1419 | ATGCAAA TTAATCT(ATGCAAA  | 1 |
| 2453 | CHIP2837 | STM/STY      | STM1678 | STY1385 | ATGAAAC TTATTGC ATGAAAC  | 1 |
| 2454 | CHIP4398 | STM/STY      | STM0497 | STY0543 | ATGTTTA(TTATTTCG(ATGTTTA | 1 |
| 2455 | CHIP4208 | STM/STY      | STM2984 | STY3124 | ATGAACG TTAATCC/ATGAACG  | 1 |
| 2456 | CHIP4320 | STM specific |         |         | ATGTTGA TTATCTC(TTGTTGA  | 0 |
| 2457 | CHIP4336 | STM/STY      | STM0270 | STY0291 | ATGAAAA TTATGCG ATGAAAA  | 1 |
| 2458 | CHIP4352 | STM/STY      | STM0408 | STY0446 | ATGGCAC TTACGGC GTGGCAC  | 1 |
| 2459 | CHIP4280 | STM/STY      | STM3148 | STY3319 | ATGAGTC TTATGCT ATGAGTC  | 1 |
| 2460 | CHIP4584 | STM/STY      | STM2830 | STY2951 | ATGACTG TTAAGTG ATGACTG  | 1 |
| 2461 | CHIP2490 | STM/STY      | STM3633 | STY4164 | ATGGCTG TTACCGG ATGGCTG  | 1 |
| 2462 | CHIP4626 | STM specil   | STM4540 |         | ATGAACA TTAATAA(CTGAACA  | 1 |
| 2463 | CHIP2530 | STM/STY      | STM3737 | STY4057 | ATGAATC TTATGGC ATGAATC  | 1 |
| 2464 | CHIP4291 | STM specil   | STM3170 |         | ATGCGAA TTAGCGA ATGCGAA  | 1 |
| 2465 | CHIP4219 | STM/STY      | STM3009 | STY3152 | ATGCGCC TTAGTAT(ATGCGCC  | 1 |
| 2466 | CHIP4243 | STM/STY      | STM3076 | STY3236 | ATGTCCT TTACAGC ATGTCCT  | 1 |
| 2467 | CHIP4589 | STM/STY      | STM2845 | STY2967 | ATGACTG TTACGCC GTGACTG  | 1 |
| 2468 | CHIP2493 | STM/STY      | STM3647 | STY4155 | ATGGCGA TTAAGTG ATGGCGA  | 1 |
| 2469 | CHIP2509 | STM/STY      | STM3680 | STY4116 | ATGACGA TTAGAAC/ATGACGA  | 1 |
| 2470 | CHIP2541 | STM/STY      | STM3768 | STY4017 | ATGACGC TTAATCT(ATGACGC  | 1 |
| 2471 | CHIP4206 | STM/STY      | STM2979 | STY3119 | ATGAAAG TTACGAT ATGAAAG  | 1 |
| 2472 | CHIP4230 | STM/STY      | STM3029 | STY3177 | ATGCTTC TTACAGG GTGCTTC  | 1 |
| 2473 | CHIP4528 | STM/STY      | STM2200 | STY2435 | ATGGGTT TTAATTT(ATGGGTT  | 1 |
| 2474 | CHIP4544 | STM specil   | STM2235 |         | ATGCACA TTATGCT(ATGCACA  | 1 |
| 2475 | CHIP1684 | STM/STY      | STM2208 | STY2444 | ATGCGGC TTATGCG ATGCGGC  | 1 |
| 2476 | CHIP2084 | STM/STY      | STM3731 | STY4063 | ATGATGA TTAATTA(ATGATGA  | 1 |
| 2477 | CHIP1916 | STM/STY      | STM3435 | STY4363 | ATGGAAA TTAGCGA ATGGAAA  | 1 |
| 2478 | CHIP1940 | STM/STY      | STM4364 | STY4721 | ATGCGTA TTAGCGT ATGCGTA  | 1 |
| 2479 | CHIP1902 | STM/STY      | STM3414 | STY4384 | ATGCGCC TTAATCT(ATGCGCC  | 1 |
| 2480 | CHIP1926 | STM/STY      | STM0941 | STY0937 | ATGCGTG TTATGGC ATGCGTG  | 1 |
| 2481 | CHIP1942 | STM/STY      | STM4366 | STY4723 | ATGGGTA TTACGCG ATGGGTA  | 1 |
| 2482 | CHIP2150 | STM/STY      | STM3247 | STY3429 | ATGAAAA TTACCCT(ATGAAAA  | 1 |
| 2483 | CHIP2166 | STM/STY      | STM3149 | STY3320 | ATGAACA TTATGAC GTGAACA  | 1 |
| 2484 | CHIP1607 | STM/STY      | STM2833 | STY2954 | ATGACAC TTATTGA ATGACAC  | 1 |
| 2485 | CHIP1960 | STM/STY      | STM4446 | STY4785 | ATGCCTT TTATGCT ATGCCTT  | 1 |



|      |          |            |         |          |                         |   |
|------|----------|------------|---------|----------|-------------------------|---|
| 2486 | CHIP1976 | STM/STY    | STM4579 | STY4926  | ATGGCAA TTATAAG GTGGCAA | 1 |
| 2487 | CHIP4485 | STM specil | STM0353 |          | ATGAGTC TTATGTC ATGAGTC | 1 |
| 2488 | CHIP1625 | STM/STY    | STM2844 | STY2966  | ATGTTAC TTAATCC GTGTTAC | 1 |
| 2489 | CHIP1641 | STM/STY    | STM2207 | STY2443  | ATGCACA TTAACA ATGCACA  | 1 |
| 2490 | CHIP1657 | STM/STY    | STM2090 | STY2300  | ATGACAG TTAGAAA ATGACAG | 1 |
| 2491 | CHIP1659 | STM/STY    | STM2092 | STY2302  | ATGAAAG TTAATCC ATGAAAG | 1 |
| 2492 | CHIP4559 | STM/STY    | STM2152 | STY2381  | ATGAAAC TTAGTCA ATGAAAC | 1 |
| 2493 | CHIP1699 | STM/STY    | STM1765 | STY1287  | ATGTGGC TTAATTT ATGTGGC | 1 |
| 2494 | CHIP2099 | STM/STY    | STM3668 | STY4130  | ATGAAAG TTACAGC ATGAAAG | 1 |
| 2495 | CHIP2115 | STM/STY    | STM3575 | STY4236  | ATGCTTT TTACAGG ATGCTTT | 1 |
| 2496 | CHIP2131 | STM/STY    | STM3336 | STY3516  | ATGACTA TTATAAT ATGACTA | 1 |
| 2497 | CHIP2222 | STM/STY    | STM3226 | STY3406  | ATGGAAC TTATCCC ATGGAAC | 1 |
| 2498 | CHIP0363 | STM/STY    | STM1402 | STY1718  | ATGGTGC TTAATAA ATGGTGC | 1 |
| 2499 | CHIP0379 | STM/STY    | STM1116 | STY1152  | ATGGCGC TTAGAAC ATGGCGC | 1 |
| 2500 | CHIP3370 | STM/STY    | STM0791 | STY0824  | ATGAACA TTACATA ATGAACA | 1 |
| 2501 | CHIP3402 | STM/STY    | STM0837 | STY0878  | ATGAATA TTAGTTC ATGAATA | 1 |
| 2502 | CHIP2183 | STM/STY    | STM3057 | STY3213  | ATGAGCC TTAACGC ATGAGCC | 1 |
| 2503 | CHIP2273 | STM/STY    | STM1103 | STY1137  | ATGGGCA TTACGCA ATGGGCA | 1 |
| 2504 | CHIP3365 | STM/STY    | STM0787 | STY0820  | ATGCGGC TTATGAG ATGCGGC | 1 |
| 2505 | CHIP3397 | STM/STY    | STM0827 | STY0865  | ATGCGGT TTAATC ATGCGGT  | 1 |
| 2506 | CHIP0303 | STM/STY    | STM1601 | STY1463  | ATGAAGA TTACGGG ATGAAGA | 1 |
| 2507 | CHIP2210 | STM/STY    | STM3256 | STY3438  | ATGCAGC TTAATTA ATGCAGC | 1 |
| 2508 | CHIP2234 | STM/STY    | STM3187 | STY3365  | ATGAAAC TTAGCCG ATGAAAC | 1 |
| 2509 | CHIP0237 | STM/STY    | STM2470 | STY2706  | ATGAATA TTAACTT ATGAATA | 1 |
| 2510 | CHIP0314 | STM/STY    | STM2304 | STY2534  | ATGGAAT TTATGAT ATGGAAT | 1 |
| 2511 | CHIP1417 | STM/STY    | STM3862 | STY3916  | ATGTTAA TTAATTT ATGTTAA | 1 |
| 2512 | CHIP1466 | STM/STY    | STM0424 | STY0463  | ATGCCGA TTAATCA ATGCCGA | 1 |
| 2513 | CHIP0582 | STM/STY    | STM2805 | STY2930  | ATGAGCA TTATGCG ATGAGCA | 1 |
| 2514 | CHIP4373 | STM/STY    | STM0454 | STY0496  | ATGCAAA TTATTGC ATGCAAA | 1 |
| 2515 | CHIP0917 | STM specil | STM3353 |          | ATGACTA TTAAGCA ATGACTA | 0 |
| 2516 | CHIP1910 | STM/STY    | STM3429 | STY4369  | ATGGCAG TTAATTT ATGGCAG | 1 |
| 2517 | CHIP1912 | STM/STY    | STM3431 | STY4367  | ATGACCG TTACAGA ATGACCG | 1 |
| 2518 | CHIP1953 | STM/STY    | STM4402 | STY4760  | ATGCGCC TTAGCCG ATGCGCC | 1 |
| 2519 | CHIP4560 | STM/STY    | STM2153 | STY2382  | ATGAAAA TTAGTCG ATGAAAA | 1 |
| 2520 | CHIP4507 | STM/STY    | STM1930 | STY2139  | ATGACTT TTAATC ATGACTT  | 1 |
| 2521 | CHIP2267 | STM/STY    | STM1065 | STY1086  | ATGAAAA TTAGGGA ATGAAAA | 1 |
| 2522 | CHIP4652 | STM/STY    | STM2653 | STY2846  | ATGCGCC TTAGTAT ATGCGCC | 1 |
| 2523 | CHIP4637 | STM/STY    | STM1443 | STY1679  | ATGAAGT TTACCAC ATGAAGT | 1 |
| 2524 | CHIP4653 | STM/STY    | STM2664 |          | ATGCGTT TTACATA ATGCGTT | 1 |
| 2525 | CHIP4598 | STM/STY    | STM4096 | STY3774  | ATGAAAA TTATTTG ATGAAAA | 1 |
| 2526 | CHIP4662 | STM/STY    | STM4302 | STY4500a | ATGGACA TTAAGTA ATGGACA | 1 |
| 2527 | CHIP0099 | STM/STY    | STM0449 | STY0491  | ATGACAG TTATTCG ATGACAG | 1 |
| 2528 | CHIP0134 | STM/STY    | STM1728 | STY1323  | ATGGCCG TTAGGAA ATGGCCG | 1 |
| 2529 | CHIP3887 | STM/STY    | STM1272 | STY1849  | ATGGGAA TTACCAA ATGGGAA | 1 |
| 2530 | CHIP4321 | STM/STY    | STM2704 |          | ATGAGCC TTAATGG ATGAGCC | 1 |
| 2531 | CHIP1366 | STM/STY    | STM0237 | STY0262  | ATGTCAA TTAGGAT ATGTCAA | 1 |
| 2532 | CHIP2616 | STM/STY    | STM0017 | STY0017  | ATGAAAA TTAGTGA ATGAAAA | 1 |
| 2533 | CHIP2563 | STM/STY    | STM2251 | STY2477  | ATGATGA TTAGCCA ATGATGA | 0 |
| 2534 | CHIP4680 | STM/STY    | STM0359 | STY0391  | ATGCTAA TTACGAT ATGCTAA | 1 |
| 2535 | CHIP4696 | STM/STY    | STM1093 | STY1125  | ATGACAC TTATCGT ATGACAC | 1 |
| 2536 | CHIP4715 | STM/STY    | STM3566 | STY4246  | ATGACGG TTATAAC ATGACGG | 1 |
| 2537 | CHIP2910 | STM/STY    | STM1851 | STY1982  | ATGATGA TTAGGCA ATGATGA | 1 |

|      |          |              |         |         |                           |   |
|------|----------|--------------|---------|---------|---------------------------|---|
| 2538 | CHIP2895 | STM/STY      | STM1829 |         | ATGATGG TTAATAA1GTGATGG   | 1 |
| 2539 | CHIP1096 | STM specil   | PSLT087 |         | ATGCATA TTATTCT(ATGCATA   | 1 |
| 2540 | CHIP1065 | STM specil   | PSLT036 |         | ATGGAGT TTAAGTCTTTGGAGT   | 1 |
| 2541 | CHIP1097 | STM specil   | PSLT088 |         | ATGAAGA TTAGTCT(GTGAAGA   | 1 |
| 2542 | CHIP0659 | STM specil   | PSLT039 |         | ATGTTGA TTATGAG ATGTTGA   | 1 |
| 2543 | CHIP1090 | STM specil   | PSLT081 |         | ATGGCGA TTATTTT(ATGGCGA   | 1 |
| 2544 | CHIP0604 | STM specil   | PSLT018 |         | ATGAAAA TTATTTG1ATGAAAA   | 1 |
| 2545 | CHIP0953 | none         | R460024 |         | ATGGACG TTAGATC ATGGACG   | 0 |
| 2546 | CHIP4882 | none         | R460018 |         | ATGAAAA TTAGTTA ATGAAAA   | 0 |
| 2547 | CHIP4908 | none         | R460063 |         | ATGGTGT TTAATTT1ATGGTGT   | 0 |
| 2548 | CHIP4903 | none         | R460056 |         | ATGGAAC TTAACCA(ATGGAAC   | 0 |
| 2549 | CHIP4891 | none         | R460036 |         | ATGTTAG TTAATA1ATGTTAG    | 0 |
| 2550 | CHIP4878 | none         | R460013 |         | ATGAAAA TTAGTTA ATGAAAA   | 0 |
| 2551 | CHIP4804 | STM specific |         |         | GGCGTG(TCAGGTT GCGGTGC    | 0 |
| 2552 | CHIP4808 | STM/STY      | STM0710 | STY0750 | CGCCGAC ACGCCTG CGCCGAC   | 1 |
| 2553 | CHIP4812 | STM/STY      |         |         | CATTGCT CGGTATC CATTGCT   | 0 |
| 2554 | CHIP4816 | STM/STY      | STM0848 | STY0887 | CGTGCTG TAAGGAT CGTGCTG   | 1 |
| 2555 | CHIP4820 | STM specific |         |         | TGAAGGA CTGGAAC TGAAGGA   | 0 |
| 2556 | CHIP4824 | STM/STY      |         |         | CTGTTTCG CGATCGC CTGTTTCG | 0 |
| 2557 | CHIP5111 | STY specific |         | STY2052 | ATGGCGC TTACGCA ATGGCGC   | 0 |
| 2558 | CHIP5217 | STM/STY      |         | STY3614 | ATGCAAT TTAGCGA ATGCAAT   | 0 |
| 2559 | CHIP5151 | STY specific |         | STY2355 | ATGTATA TTAATTAC(ATGTATA  | 0 |
| 2560 | CHIP5167 | STM/STY      |         | STY2756 | ATGCCCA TTAAGTCT GTGCCCA  | 0 |
| 2561 | CHIP5181 | STM/STY      |         | STY3006 | ATGCTTA TTATCCT ATGCTTA   | 0 |
| 2562 | CHIP4918 | STY specific |         | STY0206 | ATGTTGT TTACAGC ATGTTGT   | 0 |
| 2563 | CHIP5137 | STY specific |         | STY2104 | ATGAAAA TTAATCG(ATGAAAA   | 0 |
| 2564 | CHIP5153 | STY specific |         | STY2357 | ATGATGT TTAAGG TTGATGT    | 0 |
| 2565 | CHIP5168 | STM/STY      |         |         | ATGCAAG TTATTTG(ATGCAAG   | 0 |
| 2566 | CHIP5183 | STY specific |         | STY3065 | ATGAGCT TTAGGTA ATGAGCT   | 0 |
| 2567 | CHIP4920 | STY specific |         | STY0295 | ATGCCAA TTAATGC(ATGCCAA   | 0 |
| 2568 | CHIP4936 | STY specific |         | STY0332 | ATGAAAA TTAAGCT ATGAAAA   | 0 |
| 2569 | CHIP5147 | STY specific |         | STY2350 | ATGCCGA TTAACGC ATGCCGA   | 0 |
| 2570 | CHIP5163 | STY specific |         | STY2731 | ATGACGT TTATCCT(ATGACGT   | 0 |
| 2571 | CHIP5177 | STY specific |         | STY2888 | ATGGCTC TTACGCG ATGGCTC   | 0 |
| 2572 | CHIP5009 | STY specific |         | STY1364 | ATGAAAA TTAATTT(ATGAAAA   | 0 |
| 2573 | CHIP5025 | STY specific |         | STY1600 | ATGATAT TTATTGC(ATGATAT   | 0 |
| 2574 | CHIP5041 | STY specific |         | STY1617 | ATGAGCG TTATCCT(ATGAGCG   | 0 |
| 2575 | CHIP5165 | STY specific |         | STY2749 | ATGAAAG TTAGCTT(TTGAAAG   | 0 |
| 2576 | CHIP5268 | STM/STY      |         | STY3924 | ATGACAA TTACAGA ATGACAA   | 0 |
| 2577 | CHIP5011 | STY specific |         | STY1413 | ATGCGTA TTACATC(ATGCGTA   | 0 |
| 2578 | CHIP5027 | STY specific |         | STY1602 | ATGAAAT(TTACCAC ATGAAAT   | 0 |
| 2579 | CHIP5043 | STY specific |         | STY1619 | ATGTCAG TTACAGG ATGTCAG   | 0 |
| 2580 | CHIP5058 | STY specific |         | STY1636 | ATGGCTG TTAAGTCT ATGGCTG  | 0 |
| 2581 | CHIP5373 | STY specific |         | STY4630 | ATGAAAA TTAGCTG ATGAAAA   | 0 |
| 2582 | CHIP5307 | STY specific |         | STY4535 | ATGTTAA(TTAAGCC ATGTTAA   | 0 |
| 2583 | CHIP5328 | STY specific |         | STY4566 | ATGCTTT(TTAATTC ATGCTTT   | 0 |
| 2584 | CHIP5344 | STY specific |         | STY4584 | ATGCCCA TTAGCGA GTGCCCA   | 0 |
| 2585 | CHIP5360 | STM/STY      |         | STY4601 | ATGAATT TTATTCT/GTGAATT   | 0 |
| 2586 | CHIP5292 | STY specific |         | STY4413 | ATGTTGT TTAATTG(ATGTTGT   | 0 |
| 2587 | CHIP5363 | STM/STY      |         | STY4610 | ATGAGCG TTATATC1ATGAGCG   | 0 |
| 2588 | CHIP5377 | STY specific |         | STY4637 | ATGAATA TTATTTAC(ATGAATA  | 0 |
| 2589 | CHIP5312 | STY specific |         | STY4544 | ATGCCTG TTAAGTCT(ATGCCTG  | 0 |

|      |          |              |         |          |                          |   |
|------|----------|--------------|---------|----------|--------------------------|---|
| 2590 | CHIP5325 | STY specific |         | STY4563  | ATGAGTA TTACAGA ATGAGTA  | 0 |
| 2591 | CHIP5341 | STY specific |         | STY4580  | ATGAACG TTATAGG ATGAACG  | 0 |
| 2592 | CHIP5357 | STY specific |         | STY4597  | ATGTTCCG TTAGCGCATGTTCCG | 0 |
| 2593 | CHIP0834 | STM/STY      | STM1071 | STY1092  | ATGTACA TTAATGA ATGTACA  | 1 |
| 2594 | CHIP0858 | STM/STY      | STM4227 | STY4423  | ATGGCTA TTAACCT ATGGCTA  | 1 |
| 2595 | CHIP2673 | STM/STY      | STM0142 | STY0164  | ATGAGCG TTATCCC ATGAGCG  | 1 |
| 2596 | CHIP2689 | STM/STY      | STM0173 | STY0195  | ATGATGC TTAACCTG ATGATGC | 1 |
| 2597 | CHIP2705 | STM/STY      | STM0192 | STY0219  | ATGCAGG TTAATAC ATGCAGG  | 1 |
| 2598 | CHIP2729 | STM/STY      | STM0246 | STY0273  | ATGTCTG TTAATTA ATGTCTG  | 1 |
| 2599 | CHIP3267 | STM/STY      | STM3375 | STY3555  | ATGCGAT TTAACCC ATGCGAT  | 1 |
| 2600 | CHIP3291 | STM/STY      | STM0652 | STY0703  | ATGATGA TTAGGCC GTGATGA  | 1 |
| 2601 | CHIP3307 | STM/STY      | STM0684 | STY0722  | ATGAGAC TTACAGA ATGAGAC  | 1 |
| 2602 | CHIP0773 | STM specil   | STM3639 |          | ATGAACC TTAGTTA ATGAACC  | 1 |
| 2603 | CHIP2580 | STM/STY      | STM3839 | STY3939A | ATGAAAC TTAACCTG ATGAAAC | 1 |
| 2604 | CHIP2596 | STM/STY      | STM3858 | STY3925  | ATGACTA TTAGACT ATGACTA  | 1 |
| 2605 | CHIP0775 | STM specil   | STM3637 |          | ATGTTGA TTAACCTC ATGTTGA | 1 |
| 2606 | CHIP2590 | STM/STY      | STM3850 | STY3933  | ATGTCTG TTACGCT ATGTCTG  | 1 |
| 2607 | CHIP2606 | STM/STY      | STM3884 | STY3894  | ATGAACA TTAACCTG ATGAACA | 1 |
| 2608 | CHIP0839 | STM/STY      | STM3713 | STY4082  | ATGCTAA TTATCTA ATGCTAA  | 1 |
| 2609 | CHIP0855 | STM/STY      | STM0225 | STY0248  | ATGAAAA TTATTTA GTGAAAA  | 1 |
| 2610 | CHIP2662 | STM/STY      | STM0121 | STY0141  | ATGATCA TTATTTT ATGATCA  | 1 |
| 2611 | CHIP4072 | STM specil   | STM2765 |          | ATGCGTA TTAACCG ATGCGTA  | 1 |
| 2612 | CHIP4088 | STM/STY      | STM2790 | STY2910  | ATGTATG TTAACCG ATGTATG  | 1 |
| 2613 | CHIP2376 | STM/STY      | STM1484 | STY1583  | ATGCATA TTAATCC ATGCATA  | 1 |
| 2614 | CHIP2392 | STM/STY      | STM3439 | STY4359  | ATGGAAT TTATGCC ATGGAAT  | 1 |
| 2615 | CHIP2408 | STM/STY      | STM3480 | STY4316  | ATGTTTA TTATTGA ATGTTTA  | 1 |
| 2616 | CHIP2424 | STM/STY      | STM3508 | STY4288  | ATGGCGA TTAATGG ATGGCGA  | 1 |
| 2617 | CHIP2386 | STM/STY      | STM3411 |          | ATGAGTC TTAACGA ATGAGTC  | 1 |
| 2618 | CHIP2402 | STM/STY      | STM3462 | STY4335  | ATGCGCC TTATGAT ATGCGCC  | 1 |
| 2619 | CHIP2418 | STM/STY      | STM3498 | STY4298  | ATGATTA TTAATGA ATGATTA  | 1 |
| 2620 | CHIP3882 | STM/STY      | STM1254 | STY1867  | ATGACAA TTATTGT ATGACAA  | 1 |
| 2621 | CHIP3898 | STM/STY      | STM1287 | STY1829  | ATGAGCA TTAACGA ATGAGCA  | 1 |
| 2622 | CHIP4011 | STM/STY      | STM2118 | STY2331  | ATGATGA TTACCAG ATGATGA  | 1 |
| 2623 | CHIP2436 | STM specil   | STM3528 |          | ATGGGTG TTATTTT ATGGGTG  | 1 |
| 2624 | CHIP2452 | STM/STY      | STM3554 | STY4257  | ATGGCTG TTATACA ATGGCTG  | 1 |
| 2625 | CHIP4013 | STM/STY      | STM2120 | STY2333  | ATGAGAC TTACAGC ATGAGAC  | 1 |
| 2626 | CHIP4029 | STM/STY      | STM2711 | STY4616  | ATGGATG TTACCCC GTGGATG  | 1 |
| 2627 | CHIP3757 | STM/STY      | STM0286 | STY0310  | ATGCGCC TTACAGC ATGCGCC  | 1 |
| 2628 | CHIP3773 | STM/STY      | STM0313 | STY0358  | ATGCGCA TTATAAC ATGCGCA  | 1 |
| 2629 | CHIP4007 | STM/STY      | STM2112 | STY2324  | ATGTCTC TTATGAA ATGTCTC  | 1 |
| 2630 | CHIP4023 | STM/STY      | STM2137 |          | ATGGCAC TTACCTC ATGGCAC  | 1 |
| 2631 | CHIP4047 | STM specil   | STM2740 |          | ATGCCTA TTACGGG ATGCCTA  | 1 |
| 2632 | CHIP4063 | STM specil   | STM2756 |          | ATGGAAA TTATTCG ATGGAAA  | 1 |
| 2633 | CHIP3791 | STM specil   | STM1048 |          | ATGAGCA TTAGTCC ATGAGCA  | 1 |
| 2634 | CHIP3807 | STM/STY      | STM1082 | STY1106  | ATGCATA TTAACGT ATGCATA  | 1 |
| 2635 | CHIP3425 | STM/STY      | STM0869 | STY0902  | ATGGAAC TTAACCC GTGGAAC  | 1 |
| 2636 | CHIP3441 | STM specil   | STM0897 |          | ATGCCCT TTAGTTG TTGCCCT  | 1 |
| 2637 | CHIP3457 | STM specil   | STM0914 |          | ATGTCTC TTATCGG ATGTCTC  | 1 |
| 2638 | CHIP3473 | STM/STY      | STM0932 | STY0928  | ATGAAGG TTAACGC ATGAAGG  | 1 |
| 2639 | CHIP3113 | STM/STY      | STM2543 | STY2789  | ATGAAAT TTAATGA ATGAAAT  | 1 |
| 2640 | CHIP3129 | STM specil   | STM2585 |          | ATGATGA TTATTTA GTGATGA  | 1 |
| 2641 | CHIP3099 | STM/STY      | STM2511 | STY2752  | ATGCTAC TTAGGAG ATGCTAC  | 1 |

|      |          |            |         |         |                           |   |
|------|----------|------------|---------|---------|---------------------------|---|
| 2642 | CHIP3499 | STM/STY    | STM0986 | STY0987 | ATGTCAT TTAGGGT ATGTCAT   | 1 |
| 2643 | CHIP3524 | STM specil | STM1033 |         | ATGAAGA TTATACG GTGAAGA   | 1 |
| 2644 | CHIP3556 | STM specil | STM4215 |         | ATGGAAA TTATTGA ATGGAAA   | 1 |
| 2645 | CHIP4148 | STM/STY    | STM2851 | STY2973 | ATGAGTT TTAGGCT ATGAGTT   | 1 |
| 2646 | CHIP4172 | STM/STY    | STM2922 | STY3047 | ATGGCAT TTATTTAC ATGGCAT  | 1 |
| 2647 | CHIP3078 | STM/STY    | STM2474 | STY2711 | ATGTCCC TTAGCCT ATGTCCC   | 1 |
| 2648 | CHIP3478 | STM/STY    | STM0945 | STY0943 | ATGCTCA TTAGTGC ATGCTCA   | 1 |
| 2649 | CHIP3502 | STM/STY    | STM0989 | STY0991 | ATGGAAC TTAGGCA ATGGAAC   | 1 |
| 2650 | CHIP3527 | STM specil | STM1036 |         | ATGGAGC TTATTTTT ATGGAGC  | 1 |
| 2651 | CHIP3543 | STM specil | STM4201 |         | ATGGATA TTA CTCC ATGGATA  | 1 |
| 2652 | CHIP3567 | STM/STY    | STM4243 | STY4439 | ATGCAGC TTAACGC ATGCAGC   | 1 |
| 2653 | CHIP3665 | STM/STY    | STM4442 | STY4781 | ATGATGA TTAGCGT ATGATGA   | 1 |
| 2654 | CHIP3009 | STM/STY    | STM2318 | STY2548 | ATGAACA TTACCAG ATGAACA   | 1 |
| 2655 | CHIP3025 | STM/STY    | STM2344 | STY2574 | ATGCTGG TTAGAAA ATGCTGG   | 1 |
| 2656 | CHIP2277 | STM/STY    | STM1117 | STY1153 | ATGAAAA TTATTTT ATGAAAA   | 1 |
| 2657 | CHIP0218 | STM/STY    | STM1259 | STY1861 | ATGCTGA TTATTCC ATGCTGA   | 1 |
| 2658 | CHIP2325 | STM/STY    | STM1112 | STY1148 | ATGGAAC TTATGCT ATGGAAC   | 1 |
| 2659 | CHIP2319 | STM/STY    | STM1067 | STY1088 | ATGGTAG TTAGAAC ATGGTAG   | 1 |
| 2660 | CHIP0260 | STM/STY    | STM2516 | STY2761 | ATGCAAG TTATTTG ATGCAAG   | 1 |
| 2661 | CHIP0284 | STM/STY    | STM0026 | STY0031 | ATGCGTA TTATTCA ATGCGTA   | 1 |
| 2662 | CHIP2956 | STM/STY    | STM1987 | STY2194 | ATGCCGC TTATTTCT GTGCCGC  | 1 |
| 2663 | CHIP2972 | STM/STY    | STM2066 | STY2275 | ATGAAGA TTACGCC ATGAAGA   | 1 |
| 2664 | CHIP2988 | STM/STY    | STM2275 | STY2504 | ATGTTAC TTACGCT ATGTTAC   | 1 |
| 2665 | CHIP2958 | STM/STY    | STM1989 | STY2196 | ATGGCAG TTAGTGC TTGGCAG   | 1 |
| 2666 | CHIP2974 | STM/STY    | STM2069 | STY2278 | ATGAAAC TTA AACCT ATGAAAC | 1 |
| 2667 | CHIP2990 | STM/STY    | STM2280 | STY2509 | ATGAAAG TTAGTGC ATGAAAG   | 1 |
| 2668 | CHIP3006 | STM/STY    | STM2314 | STY2545 | ATGGACA TTAGGCG ATGGACA   | 1 |
| 2669 | CHIP3030 | STM/STY    | STM2358 | STY2588 | ATGTATA TTAACGC ATGTATA   | 1 |
| 2670 | CHIP2282 | STM/STY    | STM1187 | STY1227 | ATGTTCA TTATTTT ATGTTCA   | 1 |
| 2671 | CHIP0553 | STM/STY    | STM1174 | STY1213 | ATGCTCG TTAGTTT ATGCTCG   | 1 |
| 2672 | CHIP0569 | STM/STY    | STM3446 | STY4352 | ATGGCTC TTATTTAC ATGGCTC  | 1 |
| 2673 | CHIP1332 | STM/STY    | STM0340 | STY0373 | ATGTCTA TTATTTAT ATGTCTA  | 1 |
| 2674 | CHIP1348 | STM/STY    | STM0162 | STY0184 | ATGAAAA TTAGTCT ATGAAAA   | 1 |
| 2675 | CHIP1468 | STM/STY    | STM0442 | STY0484 | ATGTTCG TTAGTTG ATGTTCG   | 1 |
| 2676 | CHIP1484 | STM/STY    | STM4272 | STY4470 | ATGAATA TTAGAAC GTGAATA   | 1 |
| 2677 | CHIP1470 | STM/STY    | STM4182 | STY4400 | ATGCCGA TTAATCC ATGCCGA   | 1 |
| 2678 | CHIP1406 | STM/STY    | STM0139 | STY0161 | ATGCACA TTAGCAA ATGCACA   | 1 |
| 2679 | CHIP0492 | STM/STY    | STM2301 | STY2531 | ATGATGA TTATTTAC ATGATGA  | 1 |
| 2680 | CHIP3939 | STM specil | STM1361 |         | ATGAAAA TTATTGC ATGAAAA   | 1 |
| 2681 | CHIP3955 | STM/STY    | STM1436 | STY1686 | ATGTCAT TTACAGA ATGTCAT   | 1 |
| 2682 | CHIP0556 | STM/STY    | STM0399 | STY0435 | ATGACCC TTAGTGA ATGACCC   | 1 |
| 2683 | CHIP0558 | STM/STY    | STM1411 | STY1709 | ATGCTAC TTAATAT ATGCTAC   | 0 |
| 2684 | CHIP0574 | STM/STY    | STM4228 | STY4424 | ATGGATG TTAATCA ATGGATG   | 1 |
| 2685 | CHIP1337 | STM/STY    | STM0322 | STY0367 | ATGCTGG TTACGCA ATGCTGG   | 1 |
| 2686 | CHIP1361 | STM/STY    | STM0166 | STY0188 | ATGGCCC TTA CTGT ATGGCCC  | 1 |
| 2687 | CHIP1377 | STM/STY    | STM2001 | STY2208 | ATGATTA TTAATGT ATGATTA   | 1 |
| 2688 | CHIP1489 | STM/STY    | STM2403 | STY2644 | ATGACAA TTATAGA ATGACAA   | 1 |
| 2689 | CHIP1508 | STM/STY    | STM2307 | STY2537 | ATGATCT TTATGGG ATGATCT   | 1 |
| 2690 | CHIP1524 | STM/STY    | STM2295 | STY2525 | ATGCGTC TTATAAT ATGCGTC   | 1 |
| 2691 | CHIP1548 | STM/STY    | STM2546 | STY2792 | ATGCATC TTAGCGC ATGCATC   | 1 |
| 2692 | CHIP1025 | STM/STY    | STM4472 | STY4811 | ATGAAAC TTA CTGT ATGAAAC  | 1 |
| 2693 | CHIP1588 | STM/STY    | STM0535 | STY0583 | ATGGCGA TTACAGG GTGGCGA   | 1 |

|      |          |            |         |         |                          |   |
|------|----------|------------|---------|---------|--------------------------|---|
| 2694 | CHIP3136 | STM specil | STM2592 |         | ATGCAGG TTACTGT(ATGCAGG  | 1 |
| 2695 | CHIP3146 | STM specil | STM2602 |         | ATGGCAA TTACAGT ATGGCAA  | 1 |
| 2696 | CHIP2022 | STM/STY    | STM4566 | STY4917 | ATGCCTG TTACTGA(ATGCCTG  | 1 |
| 2697 | CHIP2038 | STM/STY    | STM3700 | STY4095 | ATGAACC TTAGTGG ATGAACC  | 1 |
| 2698 | CHIP2054 | STM/STY    | STM3610 | STY4193 | ATGACTA TTACTGC ATGACTA  | 1 |
| 2699 | CHIP2070 | STM/STY    | STM3514 | STY4282 | ATGTCAC TTAGCGT ATGTCAC  | 1 |
| 2700 | CHIP1519 | STM/STY    | STM2406 | STY2647 | ATGATTT/TTAAAAA(ATGATTT/ | 1 |
| 2701 | CHIP1553 | STM/STY    | STM2483 | STY2721 | ATGTCGT TTAGGCG ATGTCGT  | 1 |
| 2702 | CHIP1030 | STM/STY    | STM0959 | STY0957 | ATGGTAG TTAGCGT ATGGTAG  | 1 |
| 2703 | CHIP1593 | STM/STY    | STM0569 | STY0618 | ATGCAGG TTAATGC(ATGCAGG  | 1 |
| 2704 | CHIP2001 | STM/STY    | STM4437 | STY4776 | ATGACAA TTACCCT ATGACAA  | 1 |
| 2705 | CHIP2017 | STM/STY    | STM4544 | STY4897 | ATGGCTG TTACCCC ATGGCTG  | 0 |
| 2706 | CHIP2033 | STM/STY    | STM3734 | STY4060 | ATGCGTC TTAATTT(ATGCGTC  | 1 |
| 2707 | CHIP3191 | STM/STY    | STM3212 | STY3391 | ATGGTTA TTATAGC(ATGGTTA  | 1 |
| 2708 | CHIP3207 | STM/STY    | STM3255 | STY3437 | ATGAAAA TTACAGA(ATGAAAA  | 1 |
| 2709 | CHIP2083 | STM/STY    | STM3735 | STY4059 | ATGATCC TTATTCA(ATGATCC  | 1 |
| 2710 | CHIP0689 | STM/STY    | STM4524 |         | ATGAGTG TTAGGCT ATGAGTG  | 1 |
| 2711 | CHIP0705 | STM/STY    | STM0117 | STY0136 | ATGCGCC TTAGCGC ATGCGCC  | 1 |
| 2712 | CHIP0633 | STM/STY    | STM2888 | STY3011 | ATGTTTT/TTATTCG/ATGTTTT/ | 1 |
| 2713 | CHIP1870 | STM/STY    | STM0736 | STY0779 | ATGCAGA TTAATCG ATGCAGA  | 1 |
| 2714 | CHIP0676 | STM/STY    | STM4299 | STY4498 | ATGAGCA TTACGCT ATGAGCA  | 1 |
| 2715 | CHIP0700 | STM/STY    | STM2675 | STY2862 | ATGAGCA TTAAAAA(ATGAGCA  | 1 |
| 2716 | CHIP0716 | STM/STY    | STM2550 | STY2796 | ATGAGCA TTAGTGC ATGAGCA  | 1 |
| 2717 | CHIP0732 | STM/STY    | STM2072 | STY2281 | ATGAGCT TTATGCT ATGAGCT  | 1 |
| 2718 | CHIP0668 | STM/STY    | STM0320 | STY0365 | ATGAATA TTAGAAC ATGAATA  | 1 |
| 2719 | CHIP0623 | STM/STY    | STM0494 | STY0539 | ATGAAAT TTACAGC ATGAAAT  | 1 |
| 2720 | CHIP0639 | STM/STY    | STM1058 | STY1079 | ATGTACT TTAGATG ATGTACT  | 1 |
| 2721 | CHIP0663 | STM/STY    | STM4319 | STY4519 | ATGAAAA TTAGTAA ATGAAAA  | 1 |
| 2722 | CHIP1810 | STM/STY    | STM4063 | STY3808 | ATGAAAA TTAGCGT ATGAAAA  | 1 |
| 2723 | CHIP1842 | STM/STY    | STM0668 | STY0714 | ATGAGCC TTATTCT(ATGAGCC  | 1 |
| 2724 | CHIP1874 | STM/STY    | STM0723 | STY0764 | ATGAAAA TTAANAAT(ATGAAAA | 1 |
| 2725 | CHIP0178 | STM/STY    | STM2039 | STY2244 | ATGGCAG TTAGATG ATGGCAG  | 1 |
| 2726 | CHIP1221 | STM/STY    | STM4309 | STY4510 | ATGAAAC TTACAGC ATGAAAC  | 1 |
| 2727 | CHIP1237 | STM/STY    | STM1951 | STY2159 | ATGAGTG TTATTTCA(ATGAGTG | 1 |
| 2728 | CHIP1261 | STM/STY    | STM1677 | STY1386 | ATGGACA TTAGCGA ATGGACA  | 1 |
| 2729 | CHIP0450 | STM/STY    |         |         | ATGACTG TTATCGG GTGACTG  | 0 |
| 2730 | CHIP1301 | STM/STY    | STM0058 | STY0067 | ATGCAGA TTATATG(ATGCAGA  | 1 |
| 2731 | CHIP4692 | STM/STY    | STM1268 |         | ATGCTTA TTATATCA(ATGCTTA | 1 |
| 2732 | CHIP0133 | STM/STY    | STM4176 | STY3709 | ATGCAAC TTAATGG ATGCAAC  | 1 |
| 2733 | CHIP0149 | STM/STY    | STM2536 | STY2782 | ATGACAG TTAGGCG ATGACAG  | 1 |
| 2734 | CHIP0181 | STM/STY    | STM2042 | STY2247 | ATGAATA TTAATCG ATGAATA  | 1 |
| 2735 | CHIP1224 | STM/STY    | STM4301 | STY4500 | ATGTTAT TTACAGG ATGTTAT  | 1 |
| 2736 | CHIP1240 | STM/STY    | STM1931 | STY2140 | ATGAAAA TTACCAG ATGAAAA  | 1 |
| 2737 | CHIP0407 | STM/STY    | STM1195 | STY1234 | ATGAGCT TTAACC(ATGAGCT   | 1 |
| 2738 | CHIP1258 | STM/STY    | STM1664 | STY1400 | ATGACCA TTAACGG ATGACCA  | 1 |
| 2739 | CHIP1282 | STM/STY    | STM2667 | STY2854 | ATGACAT TTAGGCA ATGACAT  | 1 |
| 2740 | CHIP1298 | STM/STY    | STM0005 | STY0005 | ATGCTGA TTACTGC ATGCTGA  | 1 |
| 2741 | CHIP1314 | STM/STY    | STM3794 | STY3988 | ATGGAGA TTATTCA(ATGGAGA  | 1 |
| 2742 | CHIP4695 | STM/STY    | STM1474 | STY1648 | ATGAATC TTAANAAT TTGAATC | 1 |
| 2743 | CHIP1788 | STM/STY    | STM4037 | STY3839 | ATGCAGG TTAGACA(ATGCAGG  | 1 |
| 2744 | CHIP0018 | STM/STY    | STM3969 | STY3590 | ATGGATA TTAACCT/GTGGATA  | 1 |
| 2745 | CHIP0050 | STM/STY    | STM3936 | STY3623 | ATGACGG TTATTCT(ATGACGG  | 1 |

|      |          |            |         |         |                          |   |
|------|----------|------------|---------|---------|--------------------------|---|
| 2746 | CHIP2178 | STM/STY    | STM3068 | STY3226 | ATGTCGT TTAACAG,TCGTAAA  | 1 |
| 2747 | CHIP0866 | STM/STY    | STM1976 | STY2184 | ATGGGCC TTATTTG(ATGGGCC  | 1 |
| 2748 | CHIP0882 | STM/STY    | STM2429 | STY2665 | ATGTGCT TTATTTCC(ATGTGCT | 0 |
| 2749 | CHIP1719 | STM/STY    | STM1789 | STY1916 | ATGAATG TTATTTC(ATGAATG  | 1 |
| 2750 | CHIP0908 | STM/STY    | STM3287 | STY3468 | ATGAACA TTACGCT ATGAACA  | 1 |
| 2751 | CHIP1767 | STM/STY    | STM2970 | STY3109 | ATGGAAA TTAGCTG ATGGAAA  | 1 |
| 2752 | CHIP1783 | STM/STY    | STM4052 | STY3820 | ATGATTG TTACATG,ATGATTG  | 1 |
| 2753 | CHIP0013 | STM/STY    | STM3975 | STY3584 | ATGGCTG TTAGTCT ATGGCTG  | 1 |
| 2754 | CHIP0029 | STM/STY    | STM3958 | STY3601 | ATGGTGA TTA CTCT ATGGTGA | 1 |
| 2755 | CHIP0031 | STM/STY    | STM3956 | STY3603 | ATGTCCG TTATCCC,ATGTCCG  | 1 |
| 2756 | CHIP1563 | STM/STY    | STM0489 | STY0533 | ATGCGAA TTACATA CGAAAAC  | 1 |
| 2757 | CHIP0087 | STM/STY    | STM4146 | STY3739 | ATGTCTA TTAGCCG ATGTCTA  | 0 |
| 2758 | CHIP0871 | STM/STY    | STM1970 | STY2178 | ATGAGTA TTAGACA ATGAGTA  | 1 |
| 2759 | CHIP0887 | STM/STY    | STM2947 | STY3075 | ATGAGCA TTATTCC(ATGAGCA  | 1 |
| 2760 | CHIP1738 | STM/STY    | STM2999 | STY3137 | ATGTCAA TTACAGA GTGTCAA  | 1 |
| 2761 | CHIP2840 | STM/STY    | STM1686 | STY1375 | ATGTTGA TTATTTT ATGTTGA  | 1 |
| 2762 | CHIP4401 | STM/STY    | STM0501 | STY0547 | ATGCTCA TTATGCT ATGCTCA  | 1 |
| 2763 | CHIP4417 | STM/STY    | STM0526 | STY0574 | ATGGGAT TAAATC/ATGGGAT   | 1 |
| 2764 | CHIP4441 | STM specil | STM0575 |         | ATGTTGC TTAGCCC ATGTTGC  | 1 |
| 2765 | CHIP1197 | STM/STY    | STM1636 | STY1435 | ATGATCG TTAGTAA(ATGATCG  | 1 |
| 2766 | CHIP2849 | STM/STY    | STM1711 | STY1340 | ATGCAGC TTA CTTA(ATGCAGC | 1 |
| 2767 | CHIP2867 | STM/STY    | STM1761 | STY1291 | ATGCACT TTAGTGA ATGCACT  | 1 |
| 2768 | CHIP2883 | STM/STY    | STM1801 | STY1929 | ATGGATG TTATTCT(TTGGATG  | 1 |
| 2769 | CHIP2899 | STM/STY    | STM1834 | STY1963 | ATGTTTG TTAACCG ATGTTTG  | 1 |
| 2770 | CHIP2915 | STM/STY    | STM1860 | STY1995 | ATGGACG TTAGTGC ATGGACG  | 1 |
| 2771 | CHIP2939 | STM/STY    | STM1907 | STY2115 | ATGGCGT TTATTTG(ATGGCGT  | 1 |
| 2772 | CHIP4396 | STM/STY    | STM0491 | STY0535 | ATGAAAT TTAGCGA ATGAAAT  | 1 |
| 2773 | CHIP1138 | STM/STY    | STM1533 | STY1530 | ATGAATC, TTAATCT GTGAATC | 1 |
| 2774 | CHIP1154 | STM/STY    | STM1523 | STY1537 | ATGGACC TTAGTCG ATGGACC  | 1 |
| 2775 | CHIP1186 | STM/STY    | STM0973 | STY0973 | ATGTCCG TTACATG(ATGTCCG  | 1 |
| 2776 | CHIP4470 | STM/STY    | STM0621 | STY0670 | ATGACGC TTATTCC ATGACGC  | 1 |
| 2777 | CHIP2766 | STM/STY    | STM1562 | STY1501 | ATGAATA TTATTTT(ATGAATA  | 1 |
| 2778 | CHIP2782 | STM/STY    | STM1594 | STY1471 | ATGTTGG TTATTTT/ATGTTGG  | 1 |
| 2779 | CHIP2472 | STM/STY    | STM3597 | STY4205 | ATGACCA TTAACGC ATGACCA  | 1 |
| 2780 | CHIP2488 | STM/STY    | STM3631 | STY4166 | ATGCCGC TTA ACTT ATGCCGC | 1 |
| 2781 | CHIP4624 | STM specil | STM4503 |         | ATGGAAC TTAACCT/ATGGAAC  | 1 |
| 2782 | CHIP2528 | STM/STY    | STM3730 | STY4064 | ATGATGA TTAACGT(ATGATGA  | 1 |
| 2783 | CHIP4193 | STM/STY    | STM2956 | STY3094 | ATGGTCG TTACCCC ATGGTCG  | 1 |
| 2784 | CHIP4305 | STM/STY    | STM2680 | STY2867 | ATGTCAG TTAGCTT,ATGTCAG  | 1 |
| 2785 | CHIP4339 | STM/STY    | STM0382 | STY0414 | ATGGAAT TTATTGG ATGGAAT  | 1 |
| 2786 | CHIP4363 | STM/STY    | STM0437 |         | ATGGAAA TTATTCT ATGGAAA  | 1 |
| 2787 | CHIP4379 | STM/STY    | STM0463 | STY0507 | ATGAAGA TTACGCG ATGAAGA  | 1 |
| 2788 | CHIP2475 | STM specil | STM3600 |         | ATGAGCA TTATTGT(ATGAGCA  | 1 |
| 2789 | CHIP2499 | STM/STY    | STM3660 | STY4138 | ATGTATA TTATGAC,ATGTATA  | 1 |
| 2790 | CHIP2515 | STM/STY    | STM3691 | STY4105 | ATGAATA(TTACCAC ATGAATA  | 1 |
| 2791 | CHIP4326 | STM/STY    | STM4389 | STY4745 | ATGCGAG TTAGCGA ATGCGAG  | 1 |
| 2792 | CHIP4342 | STM/STY    | STM0388 | STY0421 | ATGATGC TTAAGTA ATGATGC  | 1 |
| 2793 | CHIP4358 | STM/STY    | STM0421 | STY0460 | ATGCAAT, TTATTTA/ATGCAAT | 1 |
| 2794 | CHIP4286 | STM/STY    | STM3161 | STY3333 | ATGCGCT TTACACA, TTGCGCT | 0 |
| 2795 | CHIP4590 | STM/STY    | STM2847 | STY2969 | ATGAGCA TTATCGG ATGAGCA  | 1 |
| 2796 | CHIP2502 | STM/STY    | STM3664 | STY4134 | ATGATGA TTAGCGG GTGATGA  | 1 |
| 2797 | CHIP2132 | STM/STY    | STM3335 | STY3515 | ATGATGA TTAGGCC ATGATGA  | 1 |

|      |          |            |         |         |                         |   |
|------|----------|------------|---------|---------|-------------------------|---|
| 2798 | CHIP2148 | STM/STY    | STM3263 | STY3446 | ATGAAAC TTATTCTTATGAAAC | 1 |
| 2799 | CHIP2164 | STM/STY    | STM3153 | STY3326 | ATGGAAC TTAATGG ATGGAAC | 1 |
| 2800 | CHIP4489 | STM/STY    | STM0364 | STY0396 | ATGCCTT TAAAAAC ATGCCTT | 1 |
| 2801 | CHIP4513 | STM/STY    | STM2802 | STY2925 | ATGGAGC TTAGCGA ATGGAGC | 1 |
| 2802 | CHIP4529 | STM/STY    | STM2201 | STY2436 | ATGCATA TTATTCA ATGCATA | 1 |
| 2803 | CHIP4491 | STM/STY    | STM0373 |         | ATGCACT TTACCAG ATGCACT | 1 |
| 2804 | CHIP1639 | STM/STY    | STM2183 | STY2413 | ATGCATC TTAGCCG ATGCATC | 1 |
| 2805 | CHIP1655 | STM/STY    | STM2085 | STY2294 | ATGAAAA TTATTTT ATGAAAA | 1 |
| 2806 | CHIP4555 | STM/STY    | STM2141 | STY2370 | ATGACTG TTAGGCG ATGACTG | 1 |
| 2807 | CHIP4571 | STM/STY    | STM2174 | STY2404 | ATGCGTG TTAGATT ATGCGTG | 1 |
| 2808 | CHIP1903 | STM/STY    | STM3417 | STY4381 | ATGGCAA TTATACG ATGGCAA | 1 |
| 2809 | CHIP1665 | STM/STY    | STM2108 | STY2320 | ATGAATA TTACCCC ATGAATA | 1 |
| 2810 | CHIP4565 | STM/STY    | STM2167 | STY2397 | ATGTCTT TTAATGC ATGTCTT | 1 |
| 2811 | CHIP1897 | STM/STY    | STM0262 | STY0283 | ATGAAAC TTAGCCA ATGAAAC | 1 |
| 2812 | CHIP2105 | STM/STY    | STM3624 | STY4176 | ATGACTC TTAGTGC ATGACTC | 1 |
| 2813 | CHIP2121 | STM/STY    | STM3546 | STY4265 | ATGAGTG TTATTTT ATGAGTG | 1 |
| 2814 | CHIP2137 | STM/STY    | STM3307 | STY3486 | ATGGATA TTATTCG ATGGATA | 1 |
| 2815 | CHIP1947 | STM/STY    | STM4385 | STY4741 | ATGAAAT TTAAGCT ATGAAAT | 1 |
| 2816 | CHIP1963 | STM/STY    | STM4468 | STY4806 | ATGATTA TTACGCC ATGATTA | 1 |
| 2817 | CHIP1979 | STM/STY    | STM4587 | STY4934 | ATGAATG TTATTGT ATGAATG | 1 |
| 2818 | CHIP0289 | STM/STY    | STM3740 | STY4052 | ATGGCTC TTAGTCT ATGGCTC | 1 |
| 2819 | CHIP2204 | STM/STY    | STM3298 | STY3476 | ATGACCC TTAACGC ATGACCC | 1 |
| 2820 | CHIP2220 | STM/STY    | STM3228 | STY3408 | ATGAAAT TTAGTAG ATGAAAT | 1 |
| 2821 | CHIP2191 | STM/STY    | STM3349 | STY3529 | ATGTTTG TTAGTTC ATGTTTG | 1 |
| 2822 | CHIP2207 | STM/STY    | STM3262 | STY3445 | ATGAACT TTAGACG ATGAACT | 1 |
| 2823 | CHIP2223 | STM/STY    | STM3225 | STY3405 | ATGGCTA TTAGCTA ATGGCTA | 1 |
| 2824 | CHIP0356 | STM/STY    | STM0628 | STY0677 | ATGATCA TAAAAAC ATGATCA | 1 |
| 2825 | CHIP0372 | STM/STY    | STM0170 | STY0192 | ATGAAAC TTAGTCC ATGAAAC | 1 |
| 2826 | CHIP3331 | STM/STY    | STM0722 | STY0762 | ATGAATG TTATAAC ATGAATG | 1 |
| 2827 | CHIP0351 | STM/STY    | STM4344 | STY4704 | ATGAGCC TTAGGCC ATGAGCC | 1 |
| 2828 | CHIP0367 | STM/STY    | STM1405 | STY1715 | ATGAAAC TTAGTCC ATGAAAC | 1 |
| 2829 | CHIP0383 | STM/STY    | STM1521 | STY1539 | ATGATGG TTAGTGG ATGATGG | 1 |
| 2830 | CHIP3350 | STM specil | STM0762 |         | ATGAGTC TTAATG ATGAGTC  | 1 |
| 2831 | CHIP3382 | STM/STY    | STM0808 | STY0843 | ATGTTAT TTAGGCC ATGTTAT | 1 |
| 2832 | CHIP3414 | STM specil | STM0855 |         | ATGGAGC TTAATTT ATGGAGC | 1 |
| 2833 | CHIP3702 | STM/STY    | STM4521 |         | ATGGAAT TTATTC ATGGAAT  | 1 |
| 2834 | CHIP4264 | STM specil | STM3117 |         | ATGCTAT TTAACA ATGCTAT  | 1 |
| 2835 | CHIP4383 | STM/STY    | STM0469 | STY0512 | ATGAAAC TTACCCC ATGAAAC | 1 |
| 2836 | CHIP4196 | STM/STY    | STM2965 | STY3104 | ATGACGA TTAGGAT ATGACGA | 1 |
| 2837 | CHIP4253 | STM/STY    | STM3088 | STY3242 | ATGGGTA TTAGGTC ATGGGTA | 0 |
| 2838 | CHIP0505 | STM specil | STM1866 |         | ATGTTTT TAAAAAG ATGTTTT | 1 |
| 2839 | CHIP3580 | STM/STY    | STM4271 | STY4469 | ATGGCTG TTATTC ATGGCTG  | 1 |
| 2840 | CHIP3557 | STM specil | STM4216 |         | ATGAAAC TTAATGG ATGAAAC | 1 |
| 2841 | CHIP3581 | STM/STY    | STM4274 | STY4472 | ATGAATG TTATAAT ATGAATG | 1 |
| 2842 | CHIP3526 | STM specil | STM1035 |         | ATGGCTG TTAAGCC ATGGCTG | 1 |
| 2843 | CHIP1906 | STM/STY    | STM3422 | STY4376 | ATGGCAA TTAGTCC ATGGCAA | 1 |
| 2844 | CHIP0997 | STM specil | STM1012 |         | ATGAACA TTATTTT ATGAACA | 0 |
| 2845 | CHIP4670 | STM/STY    | STM4562 | STY4912 | ATGGTAA TTAGGGT ATGGTAA | 1 |
| 2846 | CHIP1174 | STM/STY    | STM1564 | STY1496 | ATGTTTA TTAGAGA ATGTTTA | 1 |
| 2847 | CHIP1207 | STM/STY    | STM2717 | STY4622 | ATGAAAG TTAGTCC ATGAAAG | 1 |
| 2848 | CHIP1152 | STM/STY    | STM0623 | STY0672 | ATGAAAA TTATTGG ATGAAAA | 1 |
| 2849 | CHIP1184 | STM/STY    | STM0953 | STY0951 | ATGGCCA TTAGCGA ATGGCCA | 1 |

|      |          |              |         |          |                            |   |
|------|----------|--------------|---------|----------|----------------------------|---|
| 2850 | CHIP1208 | STM/STY      | STM2716 | STY4621  | ATGACGC TTAACGA ATGACGC    | 1 |
| 2851 | CHIP1407 | STM/STY      | STM0140 | STY0162  | ATGAGGT TTACGGT ATGAGGT    | 1 |
| 2852 | CHIP1345 | STM/STY      | STM0280 | STY0303  | ATGAATG TTATTTATGTGAATG    | 1 |
| 2853 | CHIP1362 | STM/STY      | STM0181 | STY0199  | ATGCTAA TTA CTGG GTGCTAA   | 1 |
| 2854 | CHIP1452 | STM/STY      | STM0389 | STY0422  | ATGCCAA TTATGAT ATGCCAA    | 1 |
| 2855 | CHIP2619 | STM/STY      | STM0020 | STY0021  | ATGAAAA TTAATAC ATGAAAA    | 1 |
| 2856 | CHIP4285 | STM/STY      | STM3160 | STY3332a | ATGGCTT TTACCCA GTGGCTT    | 1 |
| 2857 | CHIP2911 | STM/STY      | STM1852 | STY1983  | ATGTTTCG TTA AAAA ATGTTTCG | 1 |
| 2858 | CHIP2777 | STM/STY      | STM1585 | STY1480  | ATGAAAA TTAGTCA ATGAAAA    | 1 |
| 2859 | CHIP1560 | STM/STY      | STM0470 | STY0513  | ATGCAGG TTAACGT ATGCAGG    | 1 |
| 2860 | CHIP2901 | STM/STY      | STM1838 | STY1968  | ATGTGTG TTAGAGT ATGTGTG    | 1 |
| 2861 | CHIP2767 | STM/STY      | STM1565 | STY1495  | ATGAAAT TTA CTTT ATGAAAT   | 1 |
| 2862 | CHIP3360 | STM/STY      | STM0780 | STY0813  | ATGCCCA TTAGCGG TTGCCCA    | 1 |
| 2863 | CHIP0652 | STM specil   | PSLT041 |          | ATGGATT TTAGAAG ATGGATT    | 1 |
| 2864 | CHIP1107 | STM specil   | PSLT098 |          | ATGCGTA TTATTGA GTGCGTA    | 1 |
| 2865 | CHIP1092 | STM specil   | PSLT083 |          | ATGATAA TTATGAT GTGATAA    | 1 |
| 2866 | CHIP0622 | STM specil   | PSLT103 |          | ATGAAAA TTAAGA ATGAAAA     | 1 |
| 2867 | CHIP1069 | STM specil   | PSLT052 |          | ATGGAAA TTACATA ATGGAAA    | 1 |
| 2868 | CHIP1101 | STM specil   | PSLT092 |          | ATGAAAC TTACAGA ATGAAAC    | 1 |
| 2869 | CHIP4885 | none         | R460021 |          | ATGAAAA TTAGTAG ATGAAAA    | 0 |
| 2870 | CHIP4879 | none         | R460014 |          | ATGAAAA TTA AATT ATGAAAA   | 0 |
| 2871 | CHIP4872 | none         | R460007 |          | ATGCTGG TTATATC ATGCTGG    | 0 |
| 2872 | CHIP4873 | none         | R460008 |          | ATGAGTA TTATTCC ATGAGTA    | 0 |
| 2873 | CHIP4907 | none         | R460061 |          | ATGTTAC TTACAAA ATGTTAC    | 0 |
| 2874 | CHIP4901 | none         | R460054 |          | ATGAACA TTATTCC ATGAACA    | 0 |
| 2875 | CHIP4825 | STM specil   | STM2703 |          | AACGTGC GATCGCA AACGTGC    | 1 |
| 2876 | CHIP4829 | STM specific |         |          | ATCAACG GCCGGG ATCAACG     | 0 |
| 2877 | CHIP4833 | STM specil   | STM0912 |          | CTGGGG/ ACGTTCG CTGGGG/    | 1 |
| 2878 | CHIP4837 | STM/STY      |         |          | CGACGCC ACCGTTT CGACGCC    | 0 |
| 2879 | CHIP4841 | STM/STY      |         |          | CACCCAT ATCCTGA CACCCAT    | 0 |
| 2880 | CHIP4845 | STM specific |         |          | ACCCCTG CACGTAT ACCCCTG    | 0 |
| 2881 | CHIP5013 | STY specific |         | STY1499  | ATGTTGC TTATCTA TTGTTGC    | 0 |
| 2882 | CHIP5029 | STY specific |         | STY1605  | ATGATTG TTATGCC ATGATTG    | 0 |
| 2883 | CHIP5045 | STY specific |         | STY1621  | ATGGGAA TTACACCI ATGGGAA   | 0 |
| 2884 | CHIP5060 | STY specific |         | STY1639  | ATGAATA TTA ACTGI ATGAATA  | 0 |
| 2885 | CHIP5076 | STY specific |         | STY2005  | ATGGGGC TTA CTTT ATGGGGC   | 0 |
| 2886 | CHIP5089 | STY specific |         | STY2028  | ATGGCTA TTA AAAC ATGGCTA   | 0 |
| 2887 | CHIP5031 | STY specific |         | STY1607  | ATGAGTC TTA AACCT TTGAGTC  | 0 |
| 2888 | CHIP5047 | STY specific |         | STY1623  | ATGAACG TTA CTCT ATGAACG   | 0 |
| 2889 | CHIP5062 | STM/STY      |         | STY1649  | ATGAAAA TTAGAAC ATGAAAA    | 0 |
| 2890 | CHIP5078 | STY specific |         | STY2007  | ATGAGCA TTA CTTC ATGAGCA   | 0 |
| 2891 | CHIP5091 | STY specific |         | STY2030  | ATGAGCA TTA ATCT TTGAGCA   | 0 |
| 2892 | CHIP5200 | STY specific |         | STY3192  | ATGGATT TTA CTCT ATGGATT   | 0 |
| 2893 | CHIP4954 | STY specific |         | STY1014  | ATGAGAT TTA AATC ATGAGAT   | 0 |
| 2894 | CHIP4970 | STY specific |         | STY1041  | ATGGTAG TTAGTGC ATGGTAG    | 0 |
| 2895 | CHIP4985 | STY specific |         | STY1057  | ATGGGGC TTA ATCT ATGGGGC   | 0 |
| 2896 | CHIP5001 | STY specific |         | STY1073  | ATGGAAT TTATTGT ATGGAAT    | 0 |
| 2897 | CHIP5202 | STY specific |         | STY3277  | ATGTCAC TTATTCC ATGTCAC    | 0 |
| 2898 | CHIP5214 | STM/STY      | STM0768 | STY3531  | ATGGAAA TTACATT ATGGAAA    | 0 |
| 2899 | CHIP4972 | STM/STY      |         |          | ATGAATC TTAGTGC ATGAATC    | 0 |
| 2900 | CHIP4987 | STY specific |         | STY1059  | ATGTCTA TTA AAAC ATGTCTA   | 0 |
| 2901 | CHIP5095 | STY specific |         | STY2034  | ATGGCGA TTA CTTA ATGGCGA   | 0 |



|      |          |              |         |         |                          |   |
|------|----------|--------------|---------|---------|--------------------------|---|
| 2902 | CHIP5204 | STY specific |         | STY3279 | ATGGTCA TTAGGAG ATGGTCA  | 0 |
| 2903 | CHIP5134 | STY specific |         | STY2075 | ATGTATA TTACGAG ATGTATA  | 0 |
| 2904 | CHIP5150 | STY specific |         | STY2353 | ATGAAGT TTAAGT TTGAAGT   | 0 |
| 2905 | CHIP5300 | STY specific |         | STY4524 | ATGCATG TTATTTCG GTGCATG | 0 |
| 2906 | CHIP5315 | STY specific |         | STY4548 | ATGTGTG TTATTGA ATGTGTG  | 0 |
| 2907 | CHIP5329 | STY specific |         | STY4568 | ATGAGCC TTAAGC ATGAGCC   | 0 |
| 2908 | CHIP5345 | STY specific |         | STY4585 | ATGAAAG TTAAGT ATGAAAG   | 0 |
| 2909 | CHIP5361 | STY specific |         | STY4602 | ATGATGA TTAAGT ATGATGA   | 0 |
| 2910 | CHIP5293 | STY specific |         | STY4414 | ATGTTTA TTAATGA ATGTTTA  | 0 |
| 2911 | CHIP5364 | STM/STY      |         |         | ATGGCAG TTATTCA ATGGCAG  | 0 |
| 2912 | empty    | none         |         |         | empty                    | 0 |
| 2913 | empty    | none         |         |         | empty                    | 0 |
| 2914 | empty    | none         |         |         | empty                    | 0 |
| 2915 | empty    | none         |         |         | empty                    | 0 |
| 2916 | empty    | none         |         |         | empty                    | 0 |
| 2917 | CHIP0842 | STM/STY      | STM1780 | STY1906 | ATGCCTG TTAATGC GTGCCTG  | 1 |
| 2918 | CHIP2657 | STM/STY      | STM0106 | STY0123 | ATGCTAA TTACAAA ATGCTAA  | 1 |
| 2919 | CHIP3249 | STM/STY      | STM3338 | STY3519 | ATGAGTA TTAAGT ATGAGTA   | 1 |
| 2920 | CHIP3265 | STM/STY      | STM3372 | STY3552 | ATGGTGC TTATTGC ATGGTGC  | 1 |
| 2921 | CHIP2713 | STM/STY      | STM0214 | STY0237 | ATGAATA TTAAGT ATGAATA   | 1 |
| 2922 | CHIP3305 | STM/STY      | STM0682 | STY0720 | ATGACAC TTAAGT ATGACAC   | 1 |
| 2923 | CHIP3275 | STM/STY      | STM3390 | STY3569 | ATGACGA TTATTGC ATGACGA  | 1 |
| 2924 | CHIP2723 | STM/STY      | STM0235 | STY0260 | ATGCTGG TTAAGT ATGCTGG   | 1 |
| 2925 | CHIP2739 | STM/STY      | STM1515 |         | ATGAAAC TTATTTT ATGAAAC  | 1 |
| 2926 | CHIP0781 | STM/STY      | STM1964 | STY2172 | ATGAAAA TTACGGC ATGAAAA  | 1 |
| 2927 | CHIP0797 | STM/STY      | STM3710 | STY4085 | ATGATCA TTACGCG ATGATCA  | 1 |
| 2928 | CHIP0813 | STM/STY      | STM2025 | STY2229 | ATGAAAA TTATGCC ATGAAAA  | 1 |
| 2929 | CHIP0783 | STM/STY      | STM1963 | STY2171 | ATGAAAA TTACACG ATGAAAA  | 1 |
| 2930 | CHIP0807 | STM/STY      | STM2031 | STY2236 | ATGCTAA TTAAGT ATGCTAA   | 1 |
| 2931 | CHIP0823 | STM/STY      | STM1997 | STY2205 | ATGTTTCG TTAAGT ATGTTTCG | 1 |
| 2932 | CHIP2630 | STM/STY      | STM0046 | STY0055 | ATGAGTG TTAGGCA ATGAGTG  | 1 |
| 2933 | CHIP2646 | STM/STY      | STM0082 | STY0095 | ATGAAAA TTATTTT ATGAAAA  | 1 |
| 2934 | CHIP3238 | STM/STY      | STM3311 | STY3490 | ATGCAAA TTATTTT ATGCAAA  | 1 |
| 2935 | CHIP3784 | STM specil   | STM0331 |         | ATGAAAC TTAAGT ATGAAAC   | 1 |
| 2936 | CHIP3800 | STM/STY      | STM1066 | STY1087 | ATGAAGA TTAGGCC ATGAAGA  | 1 |
| 2937 | CHIP3824 | STM/STY      | STM1109 | STY1143 | ATGATGA TTACGGT ATGATGA  | 1 |
| 2938 | CHIP3840 | STM/STY      | STM1151 | STY1188 | ATGAATA TTAAGT ATGAATA   | 1 |
| 2939 | CHIP3856 | STM/STY      | STM1200 | STY1239 | ATGGGCA TTATGCC ATGGGCA  | 1 |
| 2940 | CHIP3872 | STM/STY      | STM1220 | STY1260 | ATGTATT TTAGTCG ATGTATT  | 1 |
| 2941 | CHIP3834 | STM/STY      | STM1131 | STY1168 | ATGGTTT TTAAGT ATGGTTT   | 1 |
| 2942 | CHIP3850 | STM/STY      | STM1185 | STY1226 | ATGAAAA TTATTCT ATGAAAA  | 1 |
| 2943 | CHIP3866 | STM/STY      | STM1212 | STY1252 | ATGAATA TTATGCT GTGAATA  | 1 |
| 2944 | CHIP2442 | STM specil   | STM3533 |         | ATGAAAA TTAGCAC ATGAAAA  | 1 |
| 2945 | CHIP2458 | STM/STY      | STM3572 | STY4239 | ATGAAAA TTAATCA ATGAAAA  | 1 |
| 2946 | CHIP3723 | STM/STY      | STM4567 | STY4918 | ATGACTG TTAGTAG ATGACTG  | 1 |
| 2947 | CHIP3884 | STM/STY      | STM1264 | STY1857 | ATGACGC TTATGTG ATGACGC  | 1 |
| 2948 | CHIP3900 | STM/STY      | STM1289 | STY1827 | ATGATTA TTAGCGT ATGATTA  | 1 |
| 2949 | CHIP3725 | STM specil   | STM4571 |         | ATGAAAT TTATTTT ATGAAAT  | 1 |
| 2950 | CHIP3741 | STM/STY      | STM0002 | STY0002 | ATGCGAG TTAAGT ATGCGAG   | 1 |
| 2951 | CHIP4053 | STM specil   | STM2746 |         | ATGGAAC TTATTGT ATGGAAC  | 1 |
| 2952 | CHIP4069 | STM specil   | STM2762 |         | ATGTTAA TTAGTGA ATGTTAA  | 1 |
| 2953 | CHIP3719 | STM/STY      | STM4549 | STY4902 | ATGAGTC TTATTGG ATGAGTC  | 1 |

|      |          |            |         |         |                         |   |
|------|----------|------------|---------|---------|-------------------------|---|
| 2954 | CHIP3735 | STM/STY    | STM4589 | STY4936 | ATGCGCA TTATGTG,ATGCGCA | 1 |
| 2955 | CHIP3759 | STM/STY    | STM0288 | STY0317 | ATGATGG TTATTGT,ATGATGG | 1 |
| 2956 | CHIP4071 | STM specil | STM2764 |         | ATGCAGG TTAATA,TTGCAGG  | 1 |
| 2957 | CHIP4087 | STM/STY    | STM2789 | STY2909 | ATGATTC TTATTGG,ATGATTC | 1 |
| 2958 | CHIP3815 | STM/STY    | STM1095 | STY1127 | ATGGTTA TTAGCTA,ATGGTTA | 1 |
| 2959 | CHIP3049 | STM/STY    | STM2389 | STY2621 | ATGCGTC TTATTCC,ATGCGTC | 1 |
| 2960 | CHIP3065 | STM/STY    | STM2425 | STY2661 | ATGAAAC TTAAGCT,ATGAAAC | 1 |
| 2961 | CHIP3081 | STM/STY    | STM2478 | STY2716 | ATGAAAT TTATTTT,ATGAAAT | 1 |
| 2962 | CHIP3481 | STM/STY    | STM0950 | STY0948 | ATGTCAA TTAACGC,ATGTCAA | 1 |
| 2963 | CHIP3497 | STM/STY    | STM0981 | STY0981 | ATGACTG TTAAGCT,ATGACTG | 1 |
| 2964 | CHIP3513 | STM/STY    | STM1020 | STY1034 | ATGGCGC TTACCCC,ATGGCGC | 0 |
| 2965 | CHIP3483 | STM/STY    | STM0955 | STY0953 | ATGCGTC TTAATCC,ATGCGTC | 1 |
| 2966 | CHIP3123 | STM/STY    | STM2564 | STY2811 | ATGAGCC TTAGTGT,GTGAGCC | 1 |
| 2967 | CHIP4100 | STM/STY    | STM4031 | STY3847 | ATGCATG TTATTCT,GTGCATG | 1 |
| 2968 | CHIP4132 | STM/STY    | STM4109 | STY3758 | ATGGAAC TTACAGG,ATGGAAC | 1 |
| 2969 | CHIP4156 | STM/STY    | STM2868 | STY2989 | ATGCTGA TTACCAG,ATGCTGA | 1 |
| 2970 | CHIP3604 | STM/STY    | STM4327 | STY4687 | ATGGTCG TTAATCC,ATGGTCG | 1 |
| 2971 | CHIP3086 | STM/STY    | STM2487 | STY2725 | ATGCAA TTAATCT,ATGCAA   | 1 |
| 2972 | CHIP3110 | STM/STY    | STM2535 | STY2781 | ATGATTC TTAGATG,GTGATTC | 1 |
| 2973 | CHIP3126 | STM/STY    | STM2570 | STY2816 | ATGGATA TTAATCC,ATGGATA | 1 |
| 2974 | CHIP4103 | STM/STY    | STM4044 | STY3830 | ATGATGA TTATAAC,GTGATGA | 1 |
| 2975 | CHIP4119 | STM/STY    | STM4086 | STY3784 | ATGACTG TTAAGCT,ATGACTG | 1 |
| 2976 | CHIP4143 | STM/STY    | STM4122 | STY3751 | ATGATGA TTAAGCC,ATGATGA | 1 |
| 2977 | CHIP2993 | STM/STY    | STM2284 | STY2513 | ATGAAAA TTAATTT,ATGAAAA | 1 |
| 2978 | CHIP3689 | STM specil | STM4498 |         | ATGAAAA TTACCGT,ATGAAAA | 1 |
| 2979 | CHIP3705 | STM/STY    | STM4526 | STY4884 | ATGAACA TTAAGCC,ATGAACA | 1 |
| 2980 | CHIP0202 | STM/STY    | STM1922 | STY2131 | ATGAAAA TTACCTC,ATGAAAA | 1 |
| 2981 | CHIP2301 | STM/STY    | STM1323 | STY1788 | ATGACGT TTACATG,ATGACGT | 1 |
| 2982 | CHIP0250 | STM/STY    | STM0370 | STY0402 | ATGTCTA TTAGATG,ATGTCTA | 1 |
| 2983 | CHIP0244 | STM/STY    | STM4237 | STY4433 | ATGAAAG TTACAAC,ATGAAAG | 1 |
| 2984 | CHIP0268 | STM/STY    | STM2861 | STY2983 | ATGACGA TTATTGT,ATGACGA | 1 |
| 2985 | CHIP2367 | STM/STY    | STM1445 | STY1677 | ATGATTA TTAGCGT,ATGATTA | 1 |
| 2986 | CHIP3636 | STM/STY    | STM4398 | STY4754 | ATGGTAG TTAACGC,ATGGTAG | 1 |
| 2987 | CHIP3652 | STM specil | STM4425 |         | ATGACTT TTATTTG,ATGACTT | 1 |
| 2988 | CHIP3668 | STM/STY    | STM4448 | STY4787 | ATGCGAT TTAACAA,GTGCGAT | 1 |
| 2989 | CHIP3638 | STM/STY    | STM4403 | STY4761 | ATGATTA TTAATCC,ATGATTA | 1 |
| 2990 | CHIP3654 | STM specil | STM4427 |         | ATGATGA TTAAGCT,ATGATGA | 1 |
| 2991 | CHIP3670 | STM/STY    | STM4454 | STY4794 | ATGAGCA TTAGACA,ATGAGCA | 1 |
| 2992 | CHIP3686 | STM specil | STM4495 |         | ATGAATA TTAATA,ATGAATA  | 1 |
| 2993 | CHIP3710 | STM specil | STM4536 |         | ATGATTG TTAGGCA,ATGATTG | 1 |
| 2994 | CHIP0215 | STM/STY    | STM1256 | STY1864 | ATGAAAT TTATAGA,ATGAAAT | 1 |
| 2995 | CHIP3984 | STM/STY    | STM1493 | STY1571 | ATGAGAT TTACAGC,ATGAGAT | 1 |
| 2996 | CHIP1316 | STM/STY    | STM3801 | STY3978 | ATGCACG TTAGATG,ATGCACG | 1 |
| 2997 | CHIP1428 | STM/STY    | STM3826 | STY3951 | ATGTCAA TTATGGC,ATGTCAA | 1 |
| 2998 | CHIP1444 | STM/STY    | STM0360 | STY0392 | ATGGAGT TTATTCG,ATGGAGT | 1 |
| 2999 | CHIP1380 | STM/STY    | STM0077 | STY0087 | ATGTCCG TTATAAT,ATGTCCG | 1 |
| 3000 | CHIP1396 | STM/STY    | STM0151 | STY0174 | ATGGCCT TTAATTC,ATGGCCT | 1 |
| 3001 | CHIP1478 | STM/STY    | STM4238 | STY4434 | ATGCCGC TTACGAT,ATGCCGC | 1 |
| 3002 | CHIP1502 | STM/STY    | STM2330 | STY2560 | ATGATAA TTAATCA,ATGATAA | 1 |
| 3003 | CHIP3923 | STM/STY    | STM1342 | STY1768 | ATGTCTC TTAAGTG,ATGTCTC | 1 |
| 3004 | CHIP0516 | STM/STY    | STM0865 | STY0898 | ATGCTGG TTAGTCA,ATGCTGG | 1 |
| 3005 | CHIP3963 | STM/STY    | STM1458 | STY1664 | ATGAATA TTAAGCA,ATGAATA | 1 |

|      |          |            |         |         |                         |   |
|------|----------|------------|---------|---------|-------------------------|---|
| 3006 | CHIP3987 | STM/STY    | STM1499 | STY1565 | ATGATGC TTAGATT GTGATGC | 1 |
| 3007 | CHIP3989 | STM/STY    | STM1501 | STY1562 | ATGATAC TTAGTAG GTGATAC | 1 |
| 3008 | CHIP1321 | STM/STY    | STM3791 | STY3991 | ATGACAA TTAGACA ATGACAA | 1 |
| 3009 | CHIP1433 | STM/STY    | STM2574 | STY2820 | ATGTCGG TTAATGA ATGTCGG | 1 |
| 3010 | CHIP1457 | STM/STY    | STM0404 | STY0442 | ATGCGCC TTACGGA ATGCGCC | 1 |
| 3011 | CHIP1473 | STM/STY    | STM4192 | STY4409 | ATGGCAA TTACCAC ATGGCAA | 1 |
| 3012 | CHIP1497 | STM/STY    | STM2368 | STY2599 | ATGTCCG TTAGTCC ATGTCCG | 1 |
| 3013 | CHIP0969 | STM/STY    | STM0347 | STY0381 | ATGATAA TTAAGCC ATGATAA | 1 |
| 3014 | CHIP1532 | STM/STY    | STM2527 | STY2772 | ATGGTTA TTAAAGG ATGGTTA | 1 |
| 3015 | CHIP1556 | STM/STY    | STM0460 | STY0503 | ATGCGAT TTACGCA GTGCGAT | 1 |
| 3016 | CHIP1572 | STM/STY    | STM0566 | STY0614 | ATGGATA TTAAGGT ATGGATA | 1 |
| 3017 | CHIP4741 | STM/STY    | STM1329 | STY1782 | ATGTTGA TTAAGGT ATGTTGA | 1 |
| 3018 | CHIP1996 | STM/STY    | STM4408 | STY4767 | ATGAGTT TTACGCG ATGAGTT | 1 |
| 3019 | CHIP2006 | STM/STY    | STM4476 | STY4815 | ATGACAA TTAAGGT ATGACAA | 1 |
| 3020 | CHIP3170 | STM/STY    | STM2648 | STY2841 | ATGAACG TTACGCT ATGAACG | 1 |
| 3021 | CHIP3186 | STM/STY    | STM3199 | STY3378 | ATGGATG TTATTGC ATGGATG | 1 |
| 3022 | CHIP3202 | STM/STY    | STM3241 | STY3423 | ATGAAGG TTACATC ATGAAGG | 1 |
| 3023 | CHIP3218 | STM/STY    | STM3274 | STY3457 | ATGGAGC TTAAGGT ATGGAGC | 1 |
| 3024 | CHIP0988 | STM/STY    | STM4099 | STY3770 | ATGGCTG TTAGTAT ATGGCTG | 1 |
| 3025 | CHIP1014 | STM/STY    | STM1380 |         | ATGAATG TTACCGC ATGAATG | 1 |
| 3026 | CHIP1577 | STM/STY    | STM0471 | STY0514 | ATGACAG TTACCGG ATGACAG | 1 |
| 3027 | CHIP1601 | STM/STY    | STM2791 | STY2911 | ATGCAAC TTAAGGT ATGCAAC | 1 |
| 3028 | CHIP3149 | STM specil | STM2605 |         | ATGCAAC TTAGGTG GTGCAAC | 1 |
| 3029 | CHIP3165 | STM/STY    | STM2639 | STY2832 | ATGCAGA TTAAGGT ATGCAGA | 1 |
| 3030 | CHIP3181 | STM/STY    | STM3191 |         | ATGTTTG TTACGCG ATGTTTG | 1 |
| 3031 | CHIP2051 | STM/STY    | STM3619 | STY4181 | ATGAGCG TTATTGT ATGAGCG | 1 |
| 3032 | CHIP3215 | STM/STY    | STM3269 | STY3452 | ATGAGTA TTACGCG ATGAGTA | 1 |
| 3033 | CHIP0577 | STM/STY    | STM1419 | STY1701 | ATGTCTT TTATGAA ATGTCTT | 1 |
| 3034 | CHIP0601 | STM/STY    | STM2499 | STY2740 | ATGACCG TTATTCA GTGACCG | 1 |
| 3035 | CHIP0713 | STM/STY    | STM1125 | STY1160 | ATGGCTA TTATTCC ATGGCTA | 1 |
| 3036 | CHIP0729 | STM/STY    | STM2808 | STY2933 | ATGAAAT TTAAGGT ATGAAAT | 1 |
| 3037 | CHIP1878 | STM/STY    | STM0271 | STY0292 | ATGAAAC TTAGTTT ATGAAAC | 1 |
| 3038 | CHIP0588 | STM/STY    | STM2882 | STY3005 | ATGGTTA TTAACGC ATGGTTA | 1 |
| 3039 | CHIP0612 | STM/STY    | STM3501 | STY4295 | ATGAGGC TTATGCC ATGAGGC | 1 |
| 3040 | CHIP0628 | STM/STY    | STM1694 | STY1357 | ATGCCTT TTATTCC ATGCCTT | 1 |
| 3041 | CHIP0644 | STM/STY    | STM4047 | STY3826 | ATGACTT TTATGCG ATGACTT | 1 |
| 3042 | CHIP0764 | STM/STY    | STM0550 | STY0598 | ATGCGCA TTAAGGT ATGCGCA | 1 |
| 3043 | CHIP0719 | STM/STY    | STM1224 | STY1264 | ATGCCGA TTATAAA ATGCCGA | 1 |
| 3044 | CHIP0647 | STM/STY    | STM1163 | STY1201 | ATGACTG TTATTTT ATGACTG | 1 |
| 3045 | CHIP0671 | STM/STY    | STM3470 | STY4326 | ATGAGCG TTAAGGT ATGAGCG | 1 |
| 3046 | CHIP1818 | STM/STY    | STM4038 | STY3838 | ATGAACA TTAGTCT GTGAACA | 1 |
| 3047 | CHIP1850 | STM/STY    | STM0640 | STY0691 | ATGAAAC TTATTGG ATGAAAC | 1 |
| 3048 | CHIP1882 | STM/STY    | STM0256 | STY0277 | ATGAAAG TTACCCC ATGAAAG | 1 |
| 3049 | CHIP3962 | STM/STY    | STM1457 |         | ATGAAAT TTAATCC AAATCTG | 1 |
| 3050 | CHIP0394 | STM/STY    | STM2884 | STY3007 | ATGTTAA TTAAGCG ATGTTAA | 1 |
| 3051 | CHIP0410 | STM/STY    | STM1171 | STY1210 | ATGACTC TTAGATA ATGACTC | 1 |
| 3052 | CHIP0434 | STM/STY    | STM4254 | STY4450 | ATGGATA TTATTTG ATGGATA | 1 |
| 3053 | CHIP1285 | STM/STY    | STM2688 | STY2874 | ATGGGGT TTATCGG ATGGGGT | 1 |
| 3054 | CHIP1309 | STM/STY    | STM0035 | STY0042 | ATGAAAA TTAGCCC ATGAAAA | 1 |
| 3055 | CHIP0117 | STM/STY    | STM4139 | STY3740 | ATGAGTA TTATTTT ATGAGTA | 1 |
| 3056 | CHIP4716 | STM/STY    | STM3688 | STY4108 | ATGGCAA TTAACCT ATGGCAA | 1 |
| 3057 | CHIP0157 | STM/STY    | STM3865 | STY3913 | ATGGCTA TTAAGGT ATGGCTA | 1 |

|      |          |            |         |         |                          |   |
|------|----------|------------|---------|---------|--------------------------|---|
| 3058 | CHIP4347 | STM/STY    | STM0395 | STY0429 | ATGTGCG TTATTAC T GCGTCT | 1 |
| 3059 | CHIP0397 | STM/STY    | STM2889 | STY3012 | ATGGATG TTACCCC ATGGATG  | 1 |
| 3060 | CHIP0413 | STM/STY    | STM2064 | STY2270 | ATGAGGC TTATGCT ATGAGGC  | 1 |
| 3061 | CHIP1242 | STM/STY    | STM1917 | STY2126 | ATGAGTA TTAATA CATGAGTA  | 1 |
| 3062 | CHIP1266 | STM/STY    | STM1709 | STY1342 | ATGAAAT TTATTCC GTGAAAT  | 1 |
| 3063 | CHIP0455 | STM/STY    | STM1391 | STY1729 | ATGAATG TTAATAC ATGAATG  | 1 |
| 3064 | CHIP0471 | STM/STY    | STM3722 | STY4072 | ATGAGAG TTAACCA ATGAGAG  | 1 |
| 3065 | CHIP4679 | STM/STY    | STM0348 | STY0382 | ATGAAAA TTAAGGA ATGAAAA  | 1 |
| 3066 | CHIP0120 | STM/STY    | STM4162 | STY3723 | ATGAATG TTATTGA ATGAATG  | 1 |
| 3067 | CHIP0002 | STM/STY    | STM3986 | STY3574 | ATGCATT TTATTCAC ATGCATT | 1 |
| 3068 | CHIP0493 | STM/STY    | STM2522 | STY2767 | ATGGCAA TTAGCCC GTGGCAA  | 1 |
| 3069 | CHIP0058 | STM/STY    | STM3924 | STY3631 | ATGCAGC TTACCTG GTGCAGC  | 1 |
| 3070 | CHIP0074 | STM/STY    | STM3905 | STY3652 | ATGGCGC TTAACCC ATGGCGC  | 1 |
| 3071 | CHIP1701 | STM/STY    | STM1762 | STY1290 | ATGATTG TTAGTGC ATGATTG  | 1 |
| 3072 | CHIP1717 | STM/STY    | STM1791 | STY1918 | ATGAGCA TTAGCGC ATGAGCA  | 1 |
| 3073 | CHIP1727 | STM/STY    | STM1735 | STY1316 | ATGAAGC TTATGAT ATGAAGC  | 1 |
| 3074 | CHIP0916 | STM/STY    | STM0145 | STY0167 | ATGCCGC TTAGCAA ATGCCGC  | 1 |
| 3075 | CHIP0940 | STM/STY    | STM0426 | STY0465 | ATGCTAA TTATTTCA T GCTAA | 1 |
| 3076 | CHIP1791 | STM/STY    | STM4035 | STY3842 | ATGAAAC TTATTCA CATGAAAC | 1 |
| 3077 | CHIP0393 | STM/STY    | STM1395 | STY1725 | ATGGCAT TTAACCA ATGGCAT  | 1 |
| 3078 | CHIP0761 | STM/STY    | STM0547 | STY0594 | ATGATAT TTACATA ATATACT  | 1 |
| 3079 | CHIP0039 | STM/STY    | STM3948 | STY3611 | ATGAAGC TTATACG ATGAAGC  | 1 |
| 3080 | CHIP0071 | STM/STY    | STM3909 | STY3648 | ATGGCTA TTAACCC ATGGCTA  | 1 |
| 3081 | CHIP2699 | STM/STY    | STM0184 | STY0209 | ATGATGA TTATTTG CATGACAC | 1 |
| 3082 | CHIP1706 | STM/STY    | STM1831 | STY1960 | ATGGAGA TTAGTCC ATGGAGA  | 1 |
| 3083 | CHIP1722 | STM/STY    | STM1784 | STY1910 | ATGGGAT TTAGACG ATGGGAT  | 1 |
| 3084 | CHIP0911 | STM/STY    | STM2896 | STY3019 | ATGCTGC TTATATT CTGCTGC  | 1 |
| 3085 | CHIP4385 | STM/STY    | STM0474 | STY0517 | ATGGACC TTAACAA ATGGACC  | 1 |
| 3086 | CHIP1141 | STM/STY    | STM1539 | STY1523 | ATGCAAA TTATTTT ATGCAAA  | 1 |
| 3087 | CHIP1157 | STM/STY    | STM1516 | STY1544 | ATGAATC TTAACAG ATGAATC  | 1 |
| 3088 | CHIP1181 | STM/STY    | STM0966 | STY0964 | ATGGGAA TTAAC TG ATGGGAA | 1 |
| 3089 | CHIP4465 | STM/STY    | STM0611 | STY0659 | ATGAGTA TTATGCT ATGAGTA  | 1 |
| 3090 | CHIP2753 | STM/STY    | STM1546 | STY1515 | ATGACAA TTAGTAT ATGACAA  | 1 |
| 3091 | CHIP2771 | STM specil | STM1569 |         | ATGTCTA TTAAC TA ATGTCTA | 1 |
| 3092 | CHIP2787 | STM/STY    | STM1602 | STY1462 | ATGGTCT TTAAC TC GTGGTCT | 1 |
| 3093 | CHIP2803 | STM specil | STM1626 |         | ATGGGCA TTAAGG ATGGGCA   | 1 |
| 3094 | CHIP2819 | STM/STY    | STM1648 | STY1421 | ATGAAGA TTAGTGC ATGAAGA  | 1 |
| 3095 | CHIP2843 | STM/STY    | STM1697 | STY1354 | ATGCGCT TTAACAC ATGCGCT  | 1 |
| 3096 | CHIP4404 | STM/STY    | STM0508 | STY0554 | ATGATAG TTATCCG ATGATAG  | 1 |
| 3097 | CHIP4406 | STM/STY    | STM0511 | STY0559 | ATGATTG TTATCCA ATGATTG  | 1 |
| 3098 | CHIP4422 | STM/STY    | STM0536 | STY0584 | ATGGTTA TTAAC TG ATGGTTA | 1 |
| 3099 | CHIP4454 | STM/STY    | STM0595 | STY0639 | ATGGATA TTAATGC ATGGATA  | 1 |
| 3100 | CHIP1210 | STM/STY    | STM2710 | STY4615 | ATGAATG TTATACC ATGAATG  | 1 |
| 3101 | CHIP2870 | STM/STY    | STM1768 | STY1284 | ATGATGC TTATTGC ATGATGC  | 1 |
| 3102 | CHIP2886 | STM/STY    | STM1806 | STY1935 | ATGGAGA TTACGAA ATGGAGA  | 1 |
| 3103 | CHIP4592 | STM/STY    | STM2729 |         | ATGGTCT TTAATAC GTGGTCT  | 1 |
| 3104 | CHIP4608 | STM/STY    | STM3012 | STY3156 | ATGTATT TTAGGCC ATGTATT  | 1 |
| 3105 | CHIP2512 | STM/STY    | STM3683 | STY4113 | ATGACAA TTATTTCA ATGACAA | 1 |
| 3106 | CHIP2536 | STM/STY    | STM3752 | STY4041 | ATGAGTT TTAACGT ATGAGTT  | 1 |
| 3107 | CHIP4289 | STM/STY    | STM3168 | STY3342 | ATGAGCG TTAACGC ATGAGCG  | 1 |
| 3108 | CHIP4217 | STM/STY    | STM3005 | STY3148 | ATGTCCG TTACGGA ATGTCCG  | 1 |
| 3109 | CHIP4251 | STM specil | STM3085 |         | ATGAGCA TTATTTG CATGAGCA | 1 |

|      |          |            |         |         |                            |   |
|------|----------|------------|---------|---------|----------------------------|---|
| 3110 | CHIP4275 | STM/STY    | STM3137 | STY3308 | ATGGCTA TTATTTA/ATGGCTA    | 1 |
| 3111 | CHIP4579 | STM/STY    | STM2810 | STY2936 | ATGGCTG TTA CTTA/ATGGCTG   | 1 |
| 3112 | CHIP4595 | STM/STY    | STM2800 | STY2923 | ATGTTCT(TTACGCC ATGTTCT)   | 1 |
| 3113 | CHIP4619 | STM/STY    | STM3382 | STY3562 | ATGGGCC TTATTTATATGGGCC    | 1 |
| 3114 | CHIP4635 | STM specil | STM1040 |         | ATGAATA/ TTACCGA CTGAATA/  | 1 |
| 3115 | CHIP4238 | STM/STY    | STM3055 | STY3211 | ATGGCCC TTACGCG ATGGCCC    | 1 |
| 3116 | CHIP4254 | STM/STY    | STM3089 |         | ATGACAG TTAACCC/ATGACAG    | 1 |
| 3117 | CHIP4270 | STM/STY    | STM3124 | STY3293 | ATGTCAG TTACATA/ATGTCAG    | 1 |
| 3118 | CHIP4382 | STM/STY    | STM0468 | STY0511 | ATGACAA TTATAGC/ GTGACAA   | 1 |
| 3119 | CHIP2478 | STM/STY    | STM3609 | STY4194 | ATGCAAG TTACAAC/ATGCAAG    | 1 |
| 3120 | CHIP4622 | STM specil | STM4429 |         | ATGGTGC TTAACGT/CTGGTGC    | 1 |
| 3121 | CHIP1948 | STM/STY    | STM4387 | STY4743 | ATGCTGT TTAGGCT ATGCTGT    | 1 |
| 3122 | CHIP1964 | STM/STY    | STM4474 | STY4813 | ATGAATA/ TTAGATA/ATGAATA/  | 1 |
| 3123 | CHIP1980 | STM/STY    | STM4590 | STY4937 | ATGTTGA TTATTTCC/ATGTTGA   | 1 |
| 3124 | CHIP1613 | STM/STY    | STM2841 | STY2963 | ATGAGTC TTATACC/ATGAGTC    | 1 |
| 3125 | CHIP1637 | STM/STY    | STM2180 | STY2410 | ATGGCGA TTAACCC/ ATGGCGA   | 1 |
| 3126 | CHIP1653 | STM/STY    | STM2083 | STY2292 | ATGAACG TTACAGC/ATGAACG    | 1 |
| 3127 | CHIP1615 | STM/STY    | STM2801 | STY2924 | ATGTATT TTAGTCG ATGTATT    | 1 |
| 3128 | CHIP4523 | STM/STY    | STM2193 | STY2427 | ATGCCAT TTATGGA/ ATGCCAT   | 1 |
| 3129 | CHIP1663 | STM/STY    | STM2103 | STY2315 | ATGACAA TTAATAC/ATGACAA    | 1 |
| 3130 | CHIP1679 | STM/STY    | STM2176 | STY2406 | ATGAAGC TTAGGCC/ATGAAGC    | 1 |
| 3131 | CHIP1695 | STM/STY    | STM1799 | STY1927 | ATGAAAT TTACATG/ GTGAAAT   | 1 |
| 3132 | CHIP2095 | STM/STY    | STM3674 | STY4122 | ATGAGCA TTATAAT/ATGAGCA    | 1 |
| 3133 | CHIP4549 | STM specil | STM2240 |         | ATGAGAG TTAGGCC/ GTGAGAG   | 1 |
| 3134 | CHIP1689 | STM/STY    | STM1842 | STY1972 | ATGGCAA TTAGAAG ATGGCAA    | 1 |
| 3135 | CHIP2089 | STM/STY    | STM3690 | STY4106 | ATGCACA TTATTTTT/ATGCACA   | 1 |
| 3136 | CHIP1921 | STM/STY    | STM3441 | STY4357 | ATGCAGA TTAACCC/ATGCAGA    | 1 |
| 3137 | CHIP1937 | STM/STY    | STM4360 | STY4717 | ATGAATG TTAGTCT/ATGAATG    | 1 |
| 3138 | CHIP2153 | STM/STY    | STM3240 | STY3422 | ATGATTA(TTATCCA/ATGATTA)   | 1 |
| 3139 | CHIP2139 | STM/STY    | STM3301 | STY3480 | ATGAAGT TTAACGT/ ATGAAGT   | 1 |
| 3140 | CHIP2155 | STM/STY    | STM3217 | STY3395 | ATGTCTT(TTAATGC/ATGTCTT)   | 1 |
| 3141 | CHIP2171 | STM/STY    | STM3139 | STY3310 | ATGAGCA TTACGCT/ ATGAGCA   | 1 |
| 3142 | CHIP2180 | STM/STY    | STM3066 | STY3222 | ATGATAT(TTAGTTG/ GTGATAT)  | 1 |
| 3143 | CHIP0321 | STM/STY    | STM1178 | STY1217 | ATGGATC TTAACTC/ATGGATC    | 1 |
| 3144 | CHIP2228 | STM/STY    | STM3207 | STY3386 | ATGAGTG TTAATCT/ATGAGTG    | 1 |
| 3145 | CHIP0308 | STM/STY    | STM1386 | STY1735 | ATGCGCC TTATCCA/ATGCGCC    | 1 |
| 3146 | CHIP0324 | STM specil | STM3753 |         | ATGAGAA TTA AAAAG/ ATGAGAA | 0 |
| 3147 | CHIP2231 | STM/STY    | STM3194 | STY3372 | ATGGATT TTATTTG/ATGGATT    | 1 |
| 3148 | CHIP2247 | STM/STY    | STM3103 | STY3256 | ATGCAAA TTAGCCA/ ATGCAAA   | 1 |
| 3149 | CHIP2263 | STM/STY    | STM3051 | STY3207 | ATGAGAA TTA AAGC/ ATGAGAA  | 1 |
| 3150 | CHIP3347 | STM/STY    | STM0759 | STY0800 | ATGAAAA TTA CTGT/ATGAAAA   | 1 |
| 3151 | CHIP2242 | STM/STY    | STM3136 | STY3307 | ATGGAAC TTA CTTAC/ATGGAAC  | 1 |
| 3152 | CHIP2258 | STM/STY    | STM3072 | STY3230 | ATGGCGC TTAGCGT/ ATGGCGC   | 1 |
| 3153 | CHIP2274 | STM/STY    | STM1105 | STY1139 | ATGCTCG TTACACA/ATGCTCG    | 1 |
| 3154 | CHIP3358 | STM/STY    | STM0777 | STY0810 | ATGGCTT TTAGTCT/ ATGGCTT   | 1 |
| 3155 | CHIP3390 | STM/STY    | STM0818 | STY0853 | ATGAAAA TTA CTCA/ ATGAAAA  | 1 |
| 3156 | CHIP3422 | STM/STY    | STM0863 | STY0896 | ATGACGC TTACGAG/ ATGACGC   | 1 |
| 3157 | CHIP4381 | STM/STY    | STM0466 | STY0510 | ATGCTGG TTAATAC/ATGCTGG    | 1 |
| 3158 | CHIP4343 | STM/STY    | STM0391 | STY0424 | ATGCTAC TTACAAA/ ATGCTAC   | 1 |
| 3159 | CHIP4273 | STM/STY    | STM3127 | STY3296 | ATGCAAG TTAACCC/ ATGCAAG   | 1 |
| 3160 | CHIP4432 | STM specil | STM0561 |         | ATGCTGC TTAACGG/ ATGCTGC   | 1 |
| 3161 | CHIP4433 | STM specil | STM0562 |         | ATGCGGC TTATGCC/ GTGCGGC   | 1 |

|      |          |              |         |         |                          |   |
|------|----------|--------------|---------|---------|--------------------------|---|
| 3162 | CHIP1527 | STM/STY      | STM2541 | STY2787 | ATGTCGA TTACACG ATGTCGA  | 1 |
| 3163 | CHIP4508 | STM/STY      | STM1983 | STY2191 | ATGAAGG TTAGTCC ATGAAGG  | 1 |
| 3164 | CHIP4541 | STM specil   | STM2231 |         | ATGCTGG TTAGCTCG TTGCTGG | 1 |
| 3165 | CHIP4518 | STM/STY      | STM2185 | STY2415 | ATGATCA TTAACGA ATGATCA  | 1 |
| 3166 | CHIP4495 | STM/STY      | STM0825 | STY0862 | ATGGCAT TTAGCGT ATGGCAT  | 1 |
| 3167 | CHIP1962 | STM/STY      | STM4450 | STY4789 | ATGACTT TTAAGC ATGACTT   | 1 |
| 3168 | CHIP2013 | STM/STY      | STM4523 | STY4880 | ATGACTA TTAGCTTA ATGACTA | 1 |
| 3169 | CHIP4173 | STM/STY      | STM2923 | STY3048 | ATGATTT TTAGCGT ATGATTT  | 1 |
| 3170 | CHIP2309 | STM/STY      | STM1369 | STY1754 | ATGGAAT TTATACC ATGGAAT  | 1 |
| 3171 | CHIP2327 | STM/STY      | STM1123 | STY1158 | ATGAAAC TTAACCG ATGAAAC  | 1 |
| 3172 | CHIP2359 | STM/STY      | STM1377 | STY1745 | ATGAATC TTAGCTTA ATGAATC | 1 |
| 3173 | CHIP2496 | STM/STY      | STM3652 | STY4150 | ATGCTAT TTAGACG ATGCTAT  | 1 |
| 3174 | CHIP2521 | STM/STY      | STM3703 | STY4092 | ATGCAAG TTAGCTTA ATGCAAG | 1 |
| 3175 | CHIP2624 | STM/STY      | STM0037 | STY0045 | ATGAATA TTAGTTA GTGAATA  | 1 |
| 3176 | CHIP2640 | STM/STY      | STM0071 | STY0081 | ATGGATA TTAGTTA ATGGATA  | 1 |
| 3177 | CHIP2625 | STM/STY      | STM0038 | STY0046 | ATGAATA TTAGCGC ATGAATA  | 1 |
| 3178 | CHIP2649 | STM/STY      | STM0087 | STY0102 | ATGATCA TTAACGA ATGATCA  | 1 |
| 3179 | CHIP2651 | STM/STY      | STM0091 | STY0106 | ATGAGCA TTAGTTG ATGAGCA  | 1 |
| 3180 | CHIP2644 | STM/STY      | STM0080 | STY0091 | ATGCAAA TTAGTTA ATGCAAA  | 1 |
| 3181 | CHIP0995 | STM specil   | STM2630 |         | ATGCTTA TTAGCTTA ATGCTTA | 1 |
| 3182 | CHIP2809 | STM/STY      | STM1632 | STY1439 | ATGTATC TTAGTAA ATGTATC  | 1 |
| 3183 | CHIP2842 | STM/STY      | STM1689 | STY1372 | ATGAGCC TTAGCGC ATGAGCC  | 1 |
| 3184 | CHIP2835 | STM/STY      | STM1673 | STY1391 | ATGCCAG TTAGCAG ATGCCAG  | 1 |
| 3185 | CHIP2805 | STM specil   | STM1628 |         | ATGCCGC TTAGTTA ATGCCGC  | 1 |
| 3186 | CHIP3184 | STM/STY      | STM3196 | STY3375 | ATGGCGT TTAGCTT ATGGCGT  | 1 |
| 3187 | CHIP1067 | STM specil   | PSLT044 |         | ATGAGCA TTAGACC ATGAGCA  | 1 |
| 3188 | CHIP1060 | STM specil   | PSLT028 |         | ATGCAGT TTAGATC ATGCAGT  | 1 |
| 3189 | CHIP1100 | STM specil   | PSLT091 |         | ATGAAAT TTAGTTT GTGAAAT  | 1 |
| 3190 | CHIP0654 | STM specil   | PSLT037 |         | ATGAGAG TTAGTCG ATGAGAG  | 1 |
| 3191 | CHIP1077 | STM specil   | PSLT063 |         | ATGTACG TTAGTAG ATGTACG  | 1 |
| 3192 | CHIP1109 | STM specil   | PSLT100 |         | ATGCAGC TTAGTGC ATGCAGC  | 1 |
| 3193 | CHIP4892 | none         | R460037 |         | ATGGAAA TTAGTCA ATGGAAA  | 0 |
| 3194 | CHIP4893 | none         | R460038 |         | ATGAAGG TTAGCGC ATGAAGG  | 0 |
| 3195 | CHIP4880 | none         | R460015 |         | ATGGCAT TTAGCA ATGGCAT   | 0 |
| 3196 | CHIP4887 | none         | R460032 |         | ATGACTG TTAGCAA ATGACTG  | 0 |
| 3197 | CHIP4874 | none         | R460009 |         | ATGGAAC TTAGCTA ATGGAAC  | 0 |
| 3198 | CHIP4750 | STM/STY      | PSLT010 |         | CGGTCTC CATAACG CCGTCTC  | 1 |
| 3199 | CHIP4826 | STM specific |         |         | CTTGGAC TTAGCTG CTTGGAC  | 0 |
| 3200 | CHIP4830 | STM specific |         |         | CACTGGA GTTCTGC CACTGGA  | 0 |
| 3201 | CHIP4834 | STM specific |         |         | CTCTGAA CCGATAC CTCTGAA  | 0 |
| 3202 | CHIP4838 | STM specific |         |         | CCGTCCG ATGCGAT CCGTCCG  | 0 |
| 3203 | CHIP4842 | STM specil   | STM0922 |         | GGAAAAG CCATCCG GGAAAAG  | 1 |
| 3204 | CHIP4846 | STM/STY      | STM3113 | STY3268 | AGTTCTG TTAGCGA AGTTCTG  | 1 |
| 3205 | CHIP4926 | STY specific |         | STY0311 | ATGGGTA TTAGTTT ATGGGTA  | 0 |
| 3206 | CHIP4942 | STY specific |         | STY0350 | ATGGTTA TTAGATA ATGGTTA  | 0 |
| 3207 | CHIP4958 | STY specific |         | STY1018 | ATGAACG TTAGTCC ATGAACG  | 0 |
| 3208 | CHIP4974 | STY specific |         | STY1045 | ATGGTAT TTAGTTA ATGGTAT  | 0 |
| 3209 | CHIP4989 | STY specific |         | STY1061 | ATGAACG TTAGACC ATGAACG  | 0 |
| 3210 | CHIP5097 | STY specific |         | STY2036 | ATGACTG TTAGATC ATGACTG  | 0 |
| 3211 | CHIP4944 | STM/STY      |         | STY0476 | ATGAAAA TTAGCA GTGAAAA   | 0 |
| 3212 | CHIP4960 | STY specific |         | STY1020 | ATGAAC TTAGCGA ATGAAC    | 0 |
| 3213 | CHIP4976 | STY specific |         | STY1047 | ATGACTT TTAGGCC ATGACTT  | 0 |

|      |          |              |         |         |                          |   |
|------|----------|--------------|---------|---------|--------------------------|---|
| 3214 | CHIP4991 | STY specific |         | STY1063 | ATGACAA TTACTCC(ATGACAA  | 0 |
| 3215 | CHIP5099 | STY specific |         | STY2039 | ATGGCAC TTATTTG(ATGGCAC  | 0 |
| 3216 | CHIP5114 | STY specific |         | STY2055 | ATGTTAA(TTAGGCG ATGTTAA  | 0 |
| 3217 | CHIP5049 | STY specific |         | STY1625 | ATGGCAG TTAGTTG(ATGGCAG  | 0 |
| 3218 | CHIP5064 | STM/STY      |         | STY1672 | ATGAAGA TTATGTT(ATGAAGA  | 0 |
| 3219 | CHIP5080 | STY specific |         | STY2016 | ATGGCCC TTATGCT(ATGGCCC  | 0 |
| 3220 | CHIP5093 | STY specific |         | STY2032 | ATGAGTT TTAAGAG ATGAGTT  | 0 |
| 3221 | CHIP5116 | STY specific |         | STY2057 | ATGCACA TTATATA GTGCACA  | 0 |
| 3222 | CHIP5132 | STY specific |         | STY2073 | ATGAGCA TTAGATG ATGAGCA  | 0 |
| 3223 | CHIP5066 | STY specific |         | STY1760 | ATGAAAA TTAGGCG ATGAAAA  | 0 |
| 3224 | CHIP4995 | STY specific |         | STY1067 | ATGTCGG TTATGCA ATGTCGG  | 0 |
| 3225 | CHIP5103 | STY specific |         | STY2043 | ATGAAGC TTATCCG ATGAAGC  | 0 |
| 3226 | CHIP5118 | STY specific |         | STY2059 | ATGACTA TTATTCAT TTAGCTA | 0 |
| 3227 | CHIP5224 | STY specific |         | STY3660 | ATGAATT TTATTTA ATGAATT  | 0 |
| 3228 | CHIP5239 | STY specific |         | STY3676 | ATGACAG TTAGCAA ATGACAG  | 0 |
| 3229 | CHIP5386 | STY specific |         | STY4654 | ATGAATA TTAGTGA ATGAATA  | 0 |
| 3230 | CHIP5396 | STY specific |         | STY4671 | ATGAATT(TTAATTC ATGAATT  | 0 |
| 3231 | CHIP5412 | STY specific |         | STY4824 | ATGTTTA(TTAATCT ATGTTTA  | 0 |
| 3232 | CHIP5427 | STY specific |         | STY4849 | ATGACGC TTAAGGG GTGACGC  | 0 |
| 3233 | CHIP5280 | STM/STY      |         |         | ATGTCTG TTATTGC ATGTCTG  | 0 |
| 3234 | CHIP5301 | STY specific |         | STY4525 | ATGGTAC TTAACCA GTGGTAC  | 0 |
| 3235 | buffer   | none         |         |         | buffer                   | 0 |
| 3236 | empty    | none         |         |         | empty                    | 0 |
| 3237 | empty    | none         |         |         | empty                    | 0 |
| 3238 | empty    | none         |         |         | empty                    | 0 |
| 3239 | empty    | none         |         |         | empty                    | 0 |
| 3240 | empty    | none         |         |         | empty                    | 0 |
| 3241 | CHIP0850 | STM/STY      | STM1227 | STY1267 | ATGGATA TTACTGC ATGGATA  | 1 |
| 3242 | CHIP2665 | STM/STY      | STM0126 | STY0146 | ATGGCTG TTAACCT ATGGCTG  | 1 |
| 3243 | CHIP2681 | STM specil   | STM0159 |         | ATGGGAA TTATCTT ATGGGAA  | 1 |
| 3244 | CHIP2697 | STM/STY      | STM0182 | STY0200 | ATGAAAC TTAGTGA ATGAAAC  | 1 |
| 3245 | CHIP2721 | STM/STY      | STM0233 | STY0257 | ATGGGAT TTACAAT ATGGGAT  | 1 |
| 3246 | CHIP2737 | STM/STY      | STM1513 | STY1548 | ATGGCAG TTAATTG ATGGCAG  | 1 |
| 3247 | CHIP2707 | STM/STY      | STM0194 | STY0221 | ATGAGCA TTACCGA GTGAGCA  | 1 |
| 3248 | CHIP3299 | STM/STY      | STM0660 | STY0705 | ATGTTTT(TTACGCC ATGTTTT  | 1 |
| 3249 | CHIP3315 | STM/STY      | STM0696 | STY0734 | ATGAAAT TTAGCGT ATGAAAT  | 1 |
| 3250 | CHIP2572 | STM specil   | STM3827 |         | ATGGTGA TTATCCG ATGGTGA  | 1 |
| 3251 | CHIP2588 | STM specil   | STM3846 |         | ATGACGG TTATTTG TTAGCGG  | 1 |
| 3252 | CHIP2604 | STM/STY      | STM3879 | STY3899 | ATGGCTC TTAGCAT ATGGCTC  | 1 |
| 3253 | CHIP2582 | STM/STY      | STM3841 |         | ATGGCGC TTAGTGT ATGGCGC  | 1 |
| 3254 | CHIP2598 | STM/STY      | STM3860 | STY3923 | ATGACAA TTAAGGC ATGACAA  | 1 |
| 3255 | CHIP2614 | STM/STY      | STM0014 | STY0014 | ATGGGAT TTAGCGA ATGGGAT  | 1 |
| 3256 | CHIP0847 | STM/STY      | STM2399 | STY2637 | ATGTTAA(TTAACAA ATGTTAA  | 1 |
| 3257 | CHIP0863 | STM/STY      | STM0775 | STY0808 | ATGACCC TTATACT ATGACCC  | 1 |
| 3258 | CHIP2670 | STM/STY      | STM0137 | STY0157 | ATGAAAA TTAAGC ATGAAAA   | 1 |
| 3259 | CHIP4080 | STM/STY      |         |         | ATGTTTG TTAACA TTGTTTG   | 0 |
| 3260 | CHIP3808 | STM/STY      | STM1085 | STY1112 | ATGGATC TTAGTCG ATGGATC  | 1 |
| 3261 | CHIP2384 | STM/STY      | STM3402 | STY4395 | ATGAATA TTACCC GTGAATA   | 1 |
| 3262 | CHIP2400 | STM/STY      | STM3458 | STY4340 | ATGTCTC TTAATAG ATGTCTC  | 1 |
| 3263 | CHIP2416 | STM/STY      | STM3496 | STY4300 | ATGCATA TTACATC ATGCATA  | 1 |
| 3264 | CHIP3880 | STM/STY      | STM1252 | STY1869 | ATGAAAT TTATACC ATGAAAT  | 1 |
| 3265 | CHIP2394 | STM/STY      | STM3450 | STY4348 | ATGAAAC TTAGAAT ATGAAAC  | 1 |

|      |          |              |         |         |                           |   |
|------|----------|--------------|---------|---------|---------------------------|---|
| 3266 | CHIP2410 | STM/STY      | STM3487 | STY4309 | ATGGCAG TTAGTTG ATGGCAG   | 1 |
| 3267 | CHIP3874 | STM/STY      | STM1233 | STY1273 | ATGGCAA TTATAAC GTGGCAA   | 1 |
| 3268 | CHIP3890 | STM/STY      | STM1275 | STY1843 | ATGAAAT TTA CTTT ATGAAAT  | 1 |
| 3269 | CHIP4003 | STM/STY      | STM2104 | STY2316 | ATGACAA TTA CTGA ATGACAA  | 1 |
| 3270 | CHIP4019 | STM/STY      | STM2133 | STY2346 | ATGGAAA TTATTGC ATGGAAA   | 1 |
| 3271 | CHIP2444 | STM/STY      | STM3537 | STY4273 | ATGACGC TTATCCT ATGACGC   | 1 |
| 3272 | CHIP2460 | STM/STY      | STM3574 | STY4237 | ATGAGTA TTATTCG ATGAGTA   | 1 |
| 3273 | CHIP4021 | STM/STY      | STM2135 | STY2348 | ATGGACA TTACACC ATGGACA   | 1 |
| 3274 | CHIP4037 | STM specil   | STM2724 |         | ATGAAAT TTA AATC ATGAAAT  | 1 |
| 3275 | CHIP3765 | STM/STY      | STM0296 | STY0328 | ATGGCTC TTAGCGC ATGGCTC   | 1 |
| 3276 | CHIP3781 | STM specil   | STM0328 |         | ATGTGTA TTAGAAA TTGTGTA   | 1 |
| 3277 | CHIP4015 | STM/STY      | STM2124 | STY2337 | ATGTTTA TTA CTGA ATGTTTA  | 1 |
| 3278 | CHIP4031 | STM/STY      |         |         | ATGAATC TTA CTGC ATGAATC  | 0 |
| 3279 | CHIP4055 | STM specil   | STM2748 |         | ATGCCTG TTATA TA ATGCCTG  | 1 |
| 3280 | CHIP3783 | STM specil   | STM0330 |         | ATGGATA TTA ACCG ATGGATA  | 1 |
| 3281 | CHIP3799 | STM/STY      | STM1064 | STY1085 | ATGGAAC TTATTGT ATGGAAC   | 1 |
| 3282 | CHIP2375 | STM/STY      | STM1475 | STY1647 | ATGAACC TTATCCC ATGAACC   | 1 |
| 3283 | CHIP3433 | STM/STY      | STM0884 | STY0917 | ATGTTTG TTA AATG ATGTTTG  | 1 |
| 3284 | CHIP3449 | STM specil   | STM0905 |         | ATGTGGA TTA CTTA ATGTGGA  | 1 |
| 3285 | CHIP3465 | STM specific |         |         | ATGGAAA TTATA CT ATGGAAA  | 0 |
| 3286 | CHIP3105 | STM/STY      | STM2528 | STY2773 | ATGCATG TTAGCCA ATGCATG   | 1 |
| 3287 | CHIP3121 | STM/STY      | STM2562 | STY2809 | ATGATAA TTA CTCT ATGATAA  | 1 |
| 3288 | CHIP3522 | STM specil   | STM1031 |         | ATGATGA TTATA AC ATGATGA  | 1 |
| 3289 | CHIP3491 | STM/STY      | STM0970 | STY0968 | ATGTTAT TTA ATAC ATGTTAT  | 1 |
| 3290 | CHIP3507 | STM/STY      | STM0995 | STY0997 | ATGTTGC TTACCTG ATGTTGC   | 1 |
| 3291 | CHIP4108 | STM/STY      | STM4061 | STY3810 | ATGAATC TTATA CA ATGAATC  | 1 |
| 3292 | CHIP3564 | STM/STY      | STM4224 | STY4420 | ATGATGA TTATTCC ATGATGA   | 1 |
| 3293 | CHIP4164 | STM/STY      | STM2910 | STY3034 | ATGAATC TTAGGCT ATGAATC   | 1 |
| 3294 | CHIP3612 | STM/STY      | STM4342 | STY4702 | ATGGCTG TTAGCGT ATGGCTG   | 1 |
| 3295 | CHIP3470 | STM specil   | STM0927 |         | ATGCCTT TTAGACT ATGCCTT   | 1 |
| 3296 | CHIP3494 | STM/STY      | STM0974 | STY0974 | ATGAAAG TTA ATGA GTGAAAG  | 1 |
| 3297 | CHIP3510 | STM/STY      | STM1005 | STY1011 | ATGGCTA TTA CTGC ATGGCTA  | 1 |
| 3298 | CHIP3535 | STM/STY      | STM4188 | STY4405 | ATGAGCA TTAGTCC GTGAGCA   | 1 |
| 3299 | CHIP4127 | STM specil   | STM4102 |         | ATGGAAG TTATGGC ATGGAAG   | 1 |
| 3300 | CHIP3575 | STM/STY      | STM4253 | STY4449 | ATGGAAA TTA ATAG ATGGAAA  | 1 |
| 3301 | CHIP3673 | STM/STY      | STM4467 | STY4805 | ATGGAAA TTA AATA ATGGAAA  | 1 |
| 3302 | CHIP3017 | STM/STY      | STM2334 | STY2564 | ATGCCTG TTAGGTC ATGCCTG   | 1 |
| 3303 | CHIP3033 | STM/STY      | STM2361 | STY2591 | ATGGCAT TTA ATTAC ATGGCAT | 1 |
| 3304 | CHIP2285 | STM/STY      | STM1208 | STY1248 | ATGCGGT TTATCCT GTGCGGT   | 1 |
| 3305 | CHIP0226 | STM specil   | STM3121 |         | ATGGAAC TTAGCCA ATGGAAC   | 1 |
| 3306 | CHIP2333 | STM/STY      | STM1165 | STY1203 | ATGAAGC TTAGATA GTGAAGC   | 1 |
| 3307 | CHIP0252 | STM/STY      | STM4159 | STY3726 | ATGAAAA TTA CCGC ATGAAAA  | 1 |
| 3308 | CHIP2351 | STM/STY      | STM1320 | STY1791 | ATGAATT TTATCGA ATGAATT   | 1 |
| 3309 | CHIP3620 | STM/STY      | STM4356 | STY4713 | ATGATGG TTAGGTA ATGATGG   | 1 |
| 3310 | CHIP2964 | STM specil   | STM2005 |         | ATGGCAT TTACGGT ATGGCAT   | 1 |
| 3311 | CHIP2980 | STM/STY      | STM2261 | STY2487 | ATGGTTG TTAGTGC ATGGTTG   | 1 |
| 3312 | CHIP2996 | STM/STY      | STM2291 | STY2521 | ATGGAGA TTAGTGG ATGGAGA   | 1 |
| 3313 | CHIP2966 | STM specil   | STM2007 |         | ATGCCCC TTA CTTA ATGCCCC  | 1 |
| 3314 | CHIP2982 | STM/STY      | STM2263 | STY2489 | ATGGAAC TTACGCA ATGGAAC   | 1 |
| 3315 | CHIP2998 | STM/STY      | STM2294 | STY2524 | ATGAAAA TTA AAAG ATGAAAA  | 1 |
| 3316 | CHIP3014 | STM/STY      | STM2331 | STY2561 | ATGTCCC TTATTGA ATGTCCC   | 1 |
| 3317 | CHIP3038 | STM/STY      | STM2369 | STY2600 | ATGTCTG TTAGTAC ATGTCTG   | 1 |



|      |          |            |         |         |                         |   |
|------|----------|------------|---------|---------|-------------------------|---|
| 3318 | CHIP2298 | STM/STY    | STM1313 | STY1800 | ATGAGTA TTAGAAT ATGAGTA | 1 |
| 3319 | CHIP0561 | STM/STY    | STM1414 | STY1706 | ATGCGTT TTATTCT ATGCGTT | 1 |
| 3320 | CHIP1412 | STM/STY    | STM3876 | STY3902 | ATGGAAA TTATGGC ATGGAAA | 1 |
| 3321 | CHIP1340 | STM/STY    | STM0302 | STY0337 | ATGTGGA TTACGTA ATGTGGA | 1 |
| 3322 | CHIP1356 | STM/STY    | STM0230 | STY0253 | ATGATCG TTAGGAC ATGATCG | 1 |
| 3323 | CHIP1476 | STM/STY    | STM4234 | STY4430 | ATGGAGT TTAGAAG ATGGAGT | 1 |
| 3324 | CHIP1492 | STM/STY    | STM2388 | STY2620 | ATGACTA TTAATTT ATGACTA | 1 |
| 3325 | CHIP1390 | STM/STY    | STM0131 | STY0151 | ATGTCGC TTATTGT ATGTCGC | 1 |
| 3326 | CHIP3907 | STM/STY    | STM1304 | STY1810 | ATGCGGC TTATACG ATGCGGC | 1 |
| 3327 | CHIP3931 | STM specil | STM1353 |         | ATGAATC TTAGCGG ATGAATC | 1 |
| 3328 | CHIP3947 | STM/STY    | STM1374 | STY1749 | ATGGCTG TTAGCTA ATGGCTG | 1 |
| 3329 | CHIP0540 | STM/STY    | STM1574 | STY1491 | ATGTTTC TTATCGG ATGTTTC | 1 |
| 3330 | CHIP0564 | STM/STY    | STM1417 | STY1703 | ATGCGTA TTATTCG ATGCGTA | 1 |
| 3331 | CHIP0566 | STM/STY    | STM0400 | STY0438 | ATGGAAA TTACGCC ATGGAAA | 1 |
| 3332 | CHIP1329 | STM/STY    | STM2255 | STY2481 | ATGGAAA TTAGAAA ATGGAAA | 1 |
| 3333 | CHIP1441 | STM/STY    | STM2572 | STY2818 | ATGAACT TTAACC ATGAACT  | 1 |
| 3334 | CHIP1369 | STM/STY    | STM2070 | STY2279 | ATGAAAA TTAACC ATGAAAA  | 1 |
| 3335 | CHIP1385 | STM/STY    | STM0105 | STY0122 | ATGCAAG TTAGTAA ATGCAAG | 1 |
| 3336 | CHIP1409 | STM/STY    | STM0144 | STY0166 | ATGGAAA TTAGTTG ATGGAAA | 1 |
| 3337 | CHIP1516 | STM/STY    | STM2272 | STY2499 | ATGAGCC TTAACC ATGAGCC  | 1 |
| 3338 | CHIP1540 | STM/STY    | STM2444 | STY2681 | ATGGCCG TTAACC ATGGCCG  | 1 |
| 3339 | CHIP1017 | STM/STY    | STM0829 | STY0867 | ATGCAGT TTACAGG ATGCAGT | 1 |
| 3340 | CHIP1033 | STM/STY    | STM2015 | STY2218 | ATGCGTC TTAAGG ATGCGTC  | 1 |
| 3341 | CHIP1596 | STM/STY    | STM0592 | STY0636 | ATGTCAT TTACAGG ATGTCAT | 1 |
| 3342 | CHIP3144 | STM specil | STM2600 |         | ATGAAAG TTAACGT ATGAAAG | 1 |
| 3343 | CHIP3154 | STM specil | STM2610 |         | ATGAAAT TTATTTT ATGAAAT | 1 |
| 3344 | CHIP2030 | STM/STY    | STM3749 | STY4044 | ATGAAAA TTAAGC ATGAAAA  | 1 |
| 3345 | CHIP2046 | STM/STY    | STM3630 | STY4168 | ATGAGTA TTATTCG ATGAGTA | 1 |
| 3346 | CHIP2062 | STM/STY    | STM3557 | STY4254 | ATGATAT TTAAGAT ATGATAT | 1 |
| 3347 | CHIP2078 | STM/STY    | STM0952 | STY0950 | ATGATAA TTAACC ATGATAA  | 1 |
| 3348 | CHIP1535 | STM/STY    | STM2519 | STY2764 | ATGGTAC TTAACC ATGGTAC  | 1 |
| 3349 | CHIP1561 | STM/STY    | STM0477 | STY0521 | ATGGCAC TTAGGGC ATGGCAC | 1 |
| 3350 | CHIP1585 | STM/STY    | STM0514 | STY0562 | ATGTTTG TTAACAG ATGTTTG | 1 |
| 3351 | CHIP1993 | STM/STY    | STM4399 | STY4757 | ATGGCTT TTATTC ATGGCTT  | 1 |
| 3352 | CHIP2009 | STM/STY    | STM4508 | STY4863 | ATGAACA TTATACC ATGAACA | 1 |
| 3353 | CHIP2025 | STM/STY    | STM4581 | STY4928 | ATGGCTC TTATTTG ATGGCTC | 1 |
| 3354 | CHIP2041 | STM/STY    | STM3659 | STY4139 | ATGGACC TTATTC ATGGACC  | 1 |
| 3355 | CHIP3199 | STM/STY    | STM3235 | STY3415 | ATGGCTA TTATTTT ATGGCTA | 1 |
| 3356 | CHIP2075 | STM/STY    | STM3483 | STY4313 | ATGAAAC TTATCCA ATGAAAC | 1 |
| 3357 | CHIP0585 | STM/STY    | STM3835 | STY3943 | ATGTCGA TTAATA ATGTCGA  | 1 |
| 3358 | CHIP0697 | STM/STY    | STM2077 | STY2286 | ATGCTGG TTAACAT ATGCTGG | 1 |
| 3359 | CHIP0625 | STM/STY    | STM0413 | STY0451 | ATGAAAA TTAGAAG ATGAAAA | 1 |
| 3360 | CHIP0641 | STM/STY    | STM1707 | STY1344 | ATGACGT TTATGCC ATGACGT | 1 |
| 3361 | CHIP1886 | STM/STY    | STM3408 | STY4389 | ATGAAAA TTAACC ATGAAAA  | 1 |
| 3362 | CHIP0596 | STM/STY    | STM3486 | STY4310 | ATGGAGA TTACGCC ATGGAGA | 1 |
| 3363 | CHIP0708 | STM/STY    | STM1960 | STY2168 | ATGGCTT TTAGGAC ATGGCTT | 1 |
| 3364 | CHIP0724 | STM/STY    | STM2581 | STY2827 | ATGAACC TTATTC ATGAACC  | 1 |
| 3365 | CHIP0748 | STM/STY    | STM2463 | STY2700 | ATGAATC TTATACA ATGAATC | 1 |
| 3366 | CHIP1799 | STM/STY    | STM3993 | STY3887 | ATGGCAA TTACAAG ATGGCAA | 1 |
| 3367 | CHIP0631 | STM/STY    | STM2893 | STY3016 | ATGCATT TTAATT ATGCATT  | 1 |
| 3368 | CHIP0743 | STM/STY    | STM1241 | STY1883 | ATGTTTC TTATTC ATGTTTC  | 1 |
| 3369 | CHIP0767 | STM/STY    | STM2885 | STY3008 | ATGGTAA TTATGCG ATGGTAA | 1 |

|      |          |         |         |         |                          |   |
|------|----------|---------|---------|---------|--------------------------|---|
| 3370 | CHIP1826 | STM/STY | STM0870 | STY0903 | ATGAATA TTATCCT GTGAATA  | 1 |
| 3371 | CHIP1858 | STM/STY | STM0847 | STY0886 | ATGAATA TTATTCC ATGAATA  | 1 |
| 3372 | CHIP1890 | STM/STY | STM3473 | STY4323 | ATGACTA TTAATGC ATGACTA  | 1 |
| 3373 | CHIP0186 | STM/STY | STM2047 | STY2252 | ATGGATA TTATCGC ATGGATA  | 1 |
| 3374 | CHIP1229 | STM/STY | STM4288 | STY4487 | ATGCCGT TTAGGTG ATGCCGT  | 1 |
| 3375 | CHIP1245 | STM/STY | STM1899 | STY2107 | ATGGCAG TTACAGG ATGGCAG  | 1 |
| 3376 | CHIP1269 | STM/STY | STM3365 | STY3546 | ATGAAAA TTAACCG GTGAAAA  | 1 |
| 3377 | CHIP1293 | STM/STY | STM0043 | STY0052 | ATGGCTA TTAAGCC TTGGCTA  | 1 |
| 3378 | CHIP4674 | STM/STY | STM0269 | STY0290 | ATGAGCA TTAAGG ATGAGCA   | 1 |
| 3379 | CHIP4700 | STM/STY | STM1643 | STY1426 | ATGACGT TTAATA ATGACGT   | 1 |
| 3380 | CHIP0141 | STM/STY | STM4020 | STY3858 | ATGCACA TTAGTCG ATGCACA  | 1 |
| 3381 | CHIP0165 | STM/STY | STM0800 | STY0833 | ATGTTTA TTATCGC ATGTTTA  | 1 |
| 3382 | CHIP0189 | STM/STY | STM2050 | STY2255 | ATGGCGA TTATTGA ATGGCGA  | 1 |
| 3383 | CHIP1232 | STM/STY | STM4298 | STY4497 | ATGATGA TTAACGG ATGATGA  | 1 |
| 3384 | CHIP1248 | STM/STY | STM1906 | STY2114 | ATGATCG TTACGGT ATGATCG  | 1 |
| 3385 | CHIP0415 | STM/STY | STM2062 | STY2268 | ATGCTGT TTAACGA ATGCTGT  | 1 |
| 3386 | CHIP0439 | STM/STY | STM4259 | STY4456 | ATGAAGA TTATTC ATGAAGA   | 1 |
| 3387 | CHIP1290 | STM/STY | STM2686 | STY2872 | ATGCCGC TTATCTA GTGCCGC  | 1 |
| 3388 | CHIP1306 | STM/STY | STM0045 | STY0054 | ATGAAGC TTACACC ATGAAGC  | 1 |
| 3389 | CHIP0104 | STM/STY | STM4451 | STY4790 | ATGCGCT TTAACGC ATGCGCT  | 1 |
| 3390 | CHIP4703 | STM/STY | STM1528 | STY1533 | ATGGGTA TTAATAG ATGGGTA  | 0 |
| 3391 | CHIP0064 | STM/STY | STM3918 | STY3637 | ATGTTCT TTAACTT TTCTTGC  | 1 |
| 3392 | CHIP0026 | STM/STY | STM3961 | STY3598 | ATGTTTC TTAAGCA ATGTTTC  | 1 |
| 3393 | CHIP1743 | STM/STY | STM2980 | STY3120 | ATGAAAG TTATTAT CAAGTTG  | 1 |
| 3394 | CHIP0090 | STM/STY | STM4149 | STY3736 | ATGGCTA TTAGTCC ATGGCTA  | 1 |
| 3395 | CHIP0874 | STM/STY | STM1180 | STY1219 | ATGCAAA TTACATC ATGCAAA  | 1 |
| 3396 | CHIP0890 | STM/STY | STM3476 | STY4320 | ATGTTTA TTAATTA ATGTTTA  | 1 |
| 3397 | CHIP0900 | STM/STY | STM3360 | STY3540 | ATGCGAA TTAAGC ATGCGAA   | 1 |
| 3398 | CHIP1751 | STM/STY | STM2954 | STY3083 | ATGACAA TTAGAGA ATGACAA  | 1 |
| 3399 | CHIP1775 | STM/STY | STM4092 | STY3778 | ATGACAA TTACGCT GTGACAA  | 1 |
| 3400 | CHIP0005 | STM/STY | STM3983 | STY3577 | ATGCTTT TTAAGCC ATGCTTT  | 1 |
| 3401 | CHIP0021 | STM/STY | STM3966 | STY3593 | ATGGCGC TTATGCT ATGGCGC  | 1 |
| 3402 | CHIP0037 | STM/STY | STM3950 | STY3609 | ATGCGTT TTATATC ATGCGTT  | 1 |
| 3403 | CHIP0047 | STM/STY | STM3939 | STY3620 | ATGTACC TTACGAA TTGTACC  | 1 |
| 3404 | CHIP2290 | STM/STY | STM1266 | STY1855 | ATGTTTA TTATTA CTTAGTA   | 1 |
| 3405 | CHIP0095 | STM/STY | STM4154 | STY3731 | ATGAAAG TTAACCG GTGAAAG  | 1 |
| 3406 | CHIP0879 | STM/STY | STM1700 | STY1352 | ATGGGTT TTAACCG ATGGGTT  | 1 |
| 3407 | CHIP0895 | STM/STY | STM1918 | STY2127 | ATGACAT TTATGCT ATGACAT  | 1 |
| 3408 | CHIP1746 | STM/STY | STM2964 | STY3103 | ATGCTGG TTATGTC ATGCTGG  | 1 |
| 3409 | CHIP1125 | STM/STY | STM0886 | STY0919 | ATGAAAG TTAGACA ATGAAAG  | 1 |
| 3410 | CHIP4409 | STM/STY | STM0517 | STY0565 | ATGGCAA TTAACCG ATGGCAA  | 1 |
| 3411 | CHIP1165 | STM/STY | STM0997 | STY0999 | ATGAACT TTACCAG ATGAACT  | 1 |
| 3412 | CHIP1189 | STM/STY | STM1579 | STY1486 | ATGCAAA TTATTTCC ATGCAAA | 1 |
| 3413 | CHIP4473 | STM/STY | STM0336 | STY0369 | ATGCGCA TTAACCG ATGCGCA  | 1 |
| 3414 | CHIP2857 | STM/STY | STM1734 | STY1317 | ATGTCTA TTATTGG ATGTCTA  | 1 |
| 3415 | CHIP2875 | STM/STY | STM1783 | STY1909 | ATGGCAA TTATTGC ATGGCAA  | 1 |
| 3416 | CHIP2891 | STM/STY | STM1818 | STY1948 | ATGAAGA TTAGGCT TTGAAGA  | 1 |
| 3417 | CHIP2907 | STM/STY | STM1848 | STY1979 | ATGGCTC TTAGTCT ATGGCTC  | 1 |
| 3418 | CHIP2923 | STM/STY | STM1877 | STY2083 | ATGTCCT TTAGCGT ATGTCCT  | 1 |
| 3419 | CHIP4388 | STM/STY | STM0478 | STY0522 | ATGACTA TTAGCTT ATGACTA  | 1 |
| 3420 | CHIP1144 | STM/STY | STM0612 | STY0660 | ATGAGAC TTAACCG ATGAGAC  | 1 |
| 3421 | CHIP1146 | STM/STY | STM0625 | STY0674 | ATGTCCT TTAACCG ATGTCCT  | 1 |

|      |          |            |         |         |                            |   |
|------|----------|------------|---------|---------|----------------------------|---|
| 3422 | CHIP1162 | STM/STY    | STM0984 | STY0985 | ATGCATA TTATTGGI ATGCATA   | 1 |
| 3423 | CHIP4462 | STM/STY    | STM0604 | STY0648 | ATGCAAC TTATTTA/ ATGCAAC   | 1 |
| 3424 | CHIP1218 | STM/STY    | STM1608 | STY1456 | ATGACCG TTAGGCC ATGACCG    | 1 |
| 3425 | CHIP2774 | STM specil | STM1572 |         | ATGAAAC TTAGAAC ATGAAAC    | 1 |
| 3426 | CHIP2790 | STM/STY    | STM1605 | STY1459 | ATGGATA TTAATCA( ATGGATA   | 1 |
| 3427 | CHIP2480 | STM/STY    | STM3615 | STY4188 | ATGGCAA TTAACCTT( ATGGCAA  | 1 |
| 3428 | CHIP4616 | STM/STY    | STM3130 |         | ATGATGA TTAGCGC ATGATGA    | 1 |
| 3429 | CHIP2520 | STM/STY    | STM3698 | STY4097 | ATGAACA TTAGGCT ATGAACA    | 1 |
| 3430 | CHIP4656 | STM/STY    | STM2849 | STY2971 | ATGTCTG TTATTT( ATGTCTG    | 1 |
| 3431 | CHIP4201 | STM/STY    | STM2975 | STY3115 | ATGGGAA TTAATGG( ATGGGAA   | 1 |
| 3432 | CHIP4313 | STM/STY    | STM2691 | STY2877 | ATGACCC TTATGCT( ATGACCC   | 1 |
| 3433 | CHIP4355 | STM/STY    | STM0414 | STY0452 | ATGACAA TTATTGA ATGACAA    | 1 |
| 3434 | CHIP4371 | STM/STY    | STM0450 | STY0492 | ATGAATC( TTATTTT( ATGAATC( | 1 |
| 3435 | CHIP2467 | STM/STY    | STM3584 | STY4227 | ATGCGCC TTAGTCT ATGCGCC    | 1 |
| 3436 | CHIP2491 | STM/STY    | STM3635 |         | ATGATTA TTACTTC( TTGATTA/  | 1 |
| 3437 | CHIP2507 | STM/STY    | STM3678 | STY4118 | ATGCTCG TTAAGAA ATGCTCG    | 1 |
| 3438 | CHIP2523 | STM/STY    | STM3705 | STY4090 | ATGAGGC TTATCTT( ATGAGGC   | 1 |
| 3439 | CHIP4334 | STM/STY    | STM0258 | STY0279 | ATGCGCT TTATTGC ATGCGCT    | 1 |
| 3440 | CHIP4350 | STM/STY    | STM0405 | STY0443 | ATGAAAT TTAATCA/ ATGAAAT   | 1 |
| 3441 | CHIP4278 | STM/STY    | STM3144 | STY3315 | ATGCATG TTATTGC/ ATGCATG   | 1 |
| 3442 | CHIP4582 | STM/STY    | STM2815 | STY2941 | ATGCAAC TTAGTGC ATGCAAC    | 1 |
| 3443 | CHIP2486 | STM/STY    | STM3625 | STY4173 | ATGCAGC TTATTCA/ ATGCAGC   | 1 |
| 3444 | CHIP2510 | STM/STY    | STM3681 | STY4115 | ATGCAGC TTAGCCT ATGCAGC    | 1 |
| 3445 | CHIP2140 | STM/STY    | STM3299 | STY3477 | ATGCAAG TTAAGG ATGCAAG     | 1 |
| 3446 | CHIP2156 | STM/STY    | STM3214 | STY3392 | ATGACGA TTATTTAC ATGACGA   | 1 |
| 3447 | CHIP2172 | STM/STY    | STM3134 | STY3305 | ATGAAGA TTAGCGG ATGAAGA    | 1 |
| 3448 | CHIP1621 | STM/STY    | STM2827 | STY2948 | ATGAGCA TTATTGC/ ATGAGCA   | 1 |
| 3449 | CHIP4521 | STM/STY    | STM2190 | STY2424 | ATGAATA TTATTTT( ATGAATA/  | 1 |
| 3450 | CHIP4537 | STM/STY    | STM2225 | STY2462 | ATGAGTA TTACACC GTGAGTA    | 1 |
| 3451 | CHIP1623 | STM/STY    | STM2839 | STY2961 | ATGAGTT TTAATCC ATGAGTT    | 1 |
| 3452 | CHIP1647 | STM/STY    | STM2217 | STY2453 | ATGGGCC TTATCGT( ATGGGCC   | 1 |
| 3453 | CHIP4547 | STM specil | STM2238 |         | ATGTTAG TTACTGG ATGTTAG    | 1 |
| 3454 | CHIP4563 | STM/STY    | STM2162 | STY2392 | ATGAAAC TTATTTT( GTGAAAC   | 1 |
| 3455 | CHIP1895 | STM/STY    | STM0934 | STY0930 | ATGATTG TTAGCGG ATGATTG    | 1 |
| 3456 | CHIP1911 | STM/STY    | STM3430 | STY4368 | ATGATCC TTAGAGT ATGATCC    | 1 |
| 3457 | CHIP1673 | STM/STY    | STM2149 | STY2378 | ATGAAAC TTAATCG ATGAAAC    | 1 |
| 3458 | CHIP4573 | STM/STY    | STM2178 | STY2408 | ATGTCTG TTAATAA( ATGTCTG   | 1 |
| 3459 | CHIP1905 | STM/STY    | STM3420 | STY4378 | ATGGCTA TTAACGG ATGGCTA    | 1 |
| 3460 | CHIP2113 | STM/STY    | STM3589 | STY4214 | ATGCTAC TTAATAA/ ATGCTAC   | 1 |
| 3461 | CHIP2129 | STM/STY    | STM3340 | STY3521 | ATGGACG TTACCGC ATGGACG    | 1 |
| 3462 | CHIP1969 | STM/STY    | STM4527 | STY4885 | ATGGCTG TTACTCA/ ATGGCTG   | 1 |
| 3463 | CHIP1955 | STM/STY    | STM4410 | STY4769 | ATGAGTT TTAATAA ATGAGTT    | 1 |
| 3464 | CHIP1971 | STM/STY    | STM4557 | STY4907 | ATGACAT TTAATCT( ATGACAT   | 1 |
| 3465 | CHIP1987 | STM/STY    | STM4339 | STY4699 | ATGCGCT TTACGAA( ATGCGCT   | 1 |
| 3466 | CHIP0305 | STM/STY    | STM4458 | STY4798 | ATGAGCA TTAGCGA ATGAGCA    | 1 |
| 3467 | CHIP2212 | STM/STY    | STM3253 | STY3435 | ATGTTCA TTACAGT ATGTTCA    | 1 |
| 3468 | CHIP0345 | STM/STY    | STM0667 | STY0712 | ATGAGCC TTATTCC ATGAGCC    | 1 |
| 3469 | CHIP2199 | STM/STY    | STM3322 | STY3501 | ATGATAA TTATGCC ATGATAA    | 1 |
| 3470 | CHIP2215 | STM/STY    | STM3234 | STY3414 | ATGGATT TTAGGAA ATGGATT    | 1 |
| 3471 | CHIP0348 | STM/STY    | STM0186 | STY0211 | ATGCAAG TTAACCC( ATGCAAG   | 1 |
| 3472 | CHIP0364 | STM/STY    | STM1403 | STY1717 | ATGATGA TTAAGCA ATGATGA    | 1 |
| 3473 | CHIP0380 | STM/STY    | STM3044 | STY3200 | ATGGAAC TTATGCC ATGGAAC    | 1 |

|      |          |            |         |         |                          |   |
|------|----------|------------|---------|---------|--------------------------|---|
| 3474 | CHIP3355 | STM specil | STM0769 |         | ATGAATG TTAGTCA(ATGAATG  | 1 |
| 3475 | CHIP0359 | STM/STY    | STM1398 | STY1722 | ATGTCTT(TTATGAG ATGTCTT  | 1 |
| 3476 | CHIP0375 | STM/STY    | STM1090 | STY1120 | ATGGAAA TTATGCA ATGGAAA  | 1 |
| 3477 | CHIP3334 | STM/STY    | STM0726 | STY0768 | ATGGTTA TTAGTTA TTGGTTA  | 1 |
| 3478 | CHIP3366 | STM/STY    | STM0788 | STY0821 | ATGACGC TTAACGC ATGACGC  | 1 |
| 3479 | CHIP3398 | STM/STY    | STM0832 | STY0871 | ATGCCGC TTATTTTA ATGCCGC | 1 |
| 3480 | CHIP2187 | STM/STY    | STM3049 | STY3205 | ATGGTGC TTATGCC ATGGTGC  | 1 |
| 3481 | CHIP4192 | STM/STY    | STM2955 | STY3093 | ATGGCCA TTA CTGG ATGGCCA | 1 |
| 3482 | CHIP4351 | STM/STY    | STM0406 | STY0444 | ATGAGCT TTACAGC ATGAGCT  | 1 |
| 3483 | CHIP4384 | STM/STY    | STM0473 | STY0516 | ATGTCTG TTAACGA ATGTCTG  | 1 |
| 3484 | CHIP4284 | STM/STY    | STM3159 | STY3332 | ATGGGTA TTACCCT GTGGGTA  | 1 |
| 3485 | CHIP4207 | STM/STY    | STM2983 | STY3123 | ATGAAAA TTAGTTT ATGAAAA  | 1 |
| 3486 | CHIP0490 | STM/STY    | STM1996 | STY2204 | ATGACGA TTAAGC ATGACGA   | 1 |
| 3487 | CHIP3588 | STM/STY    | STM4285 | STY4484 | ATGAGTA TTAACCC ATGAGTA  | 1 |
| 3488 | CHIP3573 | STM/STY    | STM4251 | STY4447 | ATGACCA TTAGGAC ATGACCA  | 1 |
| 3489 | CHIP3605 | STM/STY    | STM4331 | STY4691 | ATGGGGT TTAGTTC ATGGGGT  | 1 |
| 3490 | CHIP4503 | STM/STY    | STM1121 | STY1156 | ATGGCAA TTAGCTA ATGGCAA  | 1 |
| 3491 | CHIP1044 | STM specil | STM3720 |         | ATGAGTG TTATAGA ATGAGTG  | 1 |
| 3492 | CHIP1005 | STM/STY    | STM2299 | STY2529 | ATGAAAG TTATGAT ATGAAAG  | 1 |
| 3493 | CHIP2564 | STM/STY    | STM2252 | STY2478 | ATGTGTG TTATTAC TGTGGAA  | 0 |
| 3494 | CHIP1206 | STM/STY    | STM2732 | STY4639 | ATGCGAA TTAGTGG ATGCGAA  | 1 |
| 3495 | CHIP1215 | STM/STY    | STM1616 | STY1448 | ATGATTA TTAGCGC ATGATTA  | 1 |
| 3496 | CHIP1160 | STM/STY    | STM1526 | STY1535 | ATGAATG TTACCGC ATGAATG  | 1 |
| 3497 | CHIP1200 | STM/STY    | STM1652 | STY1416 | ATGAACA TTAGCGT ATGAACA  | 1 |
| 3498 | CHIP1129 | STM/STY    | STM1876 | STY2082 | ATGAAAA TTATTTA ATGAAAA  | 1 |
| 3499 | CHIP1408 | STM/STY    | STM0143 | STY0165 | ATGAAAG TTAACGC ATGAAAG  | 1 |
| 3500 | CHIP1322 | STM/STY    | STM3792 | STY3990 | ATGAACG TTAGGAC ATGAACG  | 1 |
| 3501 | CHIP1411 | STM/STY    | STM3878 | STY3900 | ATGCTGA TTAGCGC ATGCTGA  | 1 |
| 3502 | CHIP1460 | STM/STY    | STM0417 | STY0456 | ATGAACC TTAGGCC ATGAACC  | 1 |
| 3503 | CHIP4252 | STM/STY    | STM3087 | STY3241 | ATGAAAA TTAATTT ATGAAAA  | 1 |
| 3504 | CHIP3576 | STM/STY    | STM4255 |         | ATGGGTC TTAATTT ATGGGTC  | 1 |
| 3505 | CHIP2816 | STM/STY    | STM1645 | STY1424 | ATGAGTA TTAGAAT ATGAGTA  | 1 |
| 3506 | CHIP2841 | STM/STY    | STM1687 | STY1374 | ATGAATA TTATTTG ATGAATA  | 1 |
| 3507 | CHIP2538 | STM/STY    | STM3760 |         | ATGATAT TTAACAG GTGATAT  | 1 |
| 3508 | CHIP2903 | STM/STY    | STM1840 | STY1970 | ATGAAAA TTACCAG GTGAAAA  | 1 |
| 3509 | CHIP3161 | STM specil | STM2618 |         | ATGAAAC TTATTGA ATGAAAC  | 1 |
| 3510 | CHIP3338 | STM/STY    | STM0742 | STY0788 | ATGTGGT TTAGCTT ATGTGGT  | 1 |
| 3511 | CHIP1083 | STM specil | PSLT069 |         | ATGATGC TTATGCT ATGATGC  | 1 |
| 3512 | CHIP1068 | STM specil | PSLT050 |         | ATGAGCC TTAGACA ATGAGCC  | 0 |
| 3513 | CHIP1108 | STM specil | PSLT099 |         | ATGTCTC TTACCCT ATGTCTC  | 1 |
| 3514 | CHIP1053 | STM specil | PSLT006 |         | ATGCAGG TTATATG GTGCAGG  | 1 |
| 3515 | CHIP1085 | STM specil | PSLT071 |         | ATGAGAC TTATGAC ATGAGAC  | 1 |
| 3516 | CHIP1117 | STM specil | PSLT109 |         | ATGGCCT TTACAGT ATGGCCT  | 0 |
| 3517 | CHIP4898 | none       | R460049 |         | ATGAAAG TTACCAT ATGAAAG  | 0 |
| 3518 | CHIP4899 | none       | R460050 |         | ATGGTGA TTAGGCA ATGGTGA  | 0 |
| 3519 | CHIP4886 | none       | R460031 |         | ATGACCA TTATTTAC ATGACCA | 0 |
| 3520 | CHIP4895 | none       | R460040 |         | ATGAATT TTATTTT GTGAATT  | 0 |
| 3521 | CHIP4881 | none       | R460017 |         | ATGAAAG TTAGTTA ATGAAAG  | 0 |
| 3522 | CHIP4751 | STM/STY    |         |         | TCGACTT GCCAGAC TCGACTT  | 0 |
| 3523 | CHIP4827 | STM/STY    | STM0907 | STY1042 | TGGTTTC GCGATAC TGGTTTC  | 1 |
| 3524 | CHIP4831 | STM specil | STM0911 |         | GCTATCC GCGGTCT GCTATCC  | 1 |
| 3525 | CHIP4835 | STM/STY    | STM2779 |         | AAAACGC AAGACCG AAAACGC  | 1 |

|      |          |              |         |         |         |         |         |   |
|------|----------|--------------|---------|---------|---------|---------|---------|---|
| 3526 | CHIP4839 | STM/STY      |         | ATGACAA | CGTTCGG | ATGACAA | 0       |   |
| 3527 | CHIP4843 | STM/STY      |         | TGCATGG | ACTCACC | TGCATGG | 0       |   |
| 3528 | CHIP4847 | STM/STY      |         | TGCAGGA | GCCTTTT | TGCAGGA | 0       |   |
| 3529 | CHIP5021 | STY specific | STY1596 | ATGACTG | TTATTGT | GTGACTG | 0       |   |
| 3530 | CHIP5037 | STY specific | STY1613 | ATGGTCG | TTATTCA | ATGGTCC | 0       |   |
| 3531 | CHIP5052 | STY specific | STY1629 | ATGGCCA | TTAGCTG | GTGGCCA | 0       |   |
| 3532 | CHIP5068 | STY specific | STY1879 | ATGCTGA | TTAAGCA | ATGCTGA | 0       |   |
| 3533 | CHIP5082 | STY specific | STY2020 | ATGCCTG | TTATGCT | ATGCCTG | 0       |   |
| 3534 | CHIP5190 | STY specific | STY3086 | ATGATGA | TTATTCC | TTGATGA | 0       |   |
| 3535 | CHIP5039 | STY specific | STY1615 | ATGACAA | TTAGAAT | ATGACAA | 0       |   |
| 3536 | CHIP5054 | STY specific | STY1631 | ATGATGT | TTATCTC | GTGATGT | 0       |   |
| 3537 | CHIP5070 | STY specific | STY1887 | ATGAGTT | TTAATTA | ATGAGTT | 0       |   |
| 3538 | CHIP5084 | STY specific | STY2022 | ATGAAAA | TTACTTC | ATGAAAA | 0       |   |
| 3539 | CHIP5192 | STY specific | STY3088 | ATGACGA | TTACTGG | ATGACGA | 0       |   |
| 3540 | CHIP5206 | STY specific | STY3287 | ATGCAGC | TTATGCT | ATGCAGC | 0       |   |
| 3541 | CHIP4962 | STY specific | STY1027 | ATGACCA | TTACGAT | ATGACCA | 0       |   |
| 3542 | CHIP4978 | STY specific | STY1049 | ATGACGA | TTAGGCG | ATGACGA | 0       |   |
| 3543 | CHIP4993 | STY specific | STY1065 | ATGAAAA | TTACCCA | GTGAAAA | 0       |   |
| 3544 | CHIP5101 | STY specific | STY2041 | ATGGCAA | TTAAGCG | ATGGCAA | 0       |   |
| 3545 | CHIP5208 | STY specific | STY3289 | ATGTTTC | TTAATTA | TTGTTTC | 0       |   |
| 3546 | CHIP5222 | STY specific | STY3658 | ATGGCAG | TTACGGG | ATGGCAG | 0       |   |
| 3547 | CHIP4980 | STY specific | STY1051 | ATGAATA | TTAAATC | ATGAATA | 0       |   |
| 3548 | CHIP5087 | STY specific | STY2026 | ATGAACG | TTACGCA | ATGAACG | 0       |   |
| 3549 | CHIP5196 | STY specific | STY3092 | ATGCCTG | TTATTCC | TTGCCTG | 0       |   |
| 3550 | CHIP5126 | STY specific | STY2067 | ATGGATA | TTACTCA | ATGGATA | 0       |   |
| 3551 | CHIP5142 | STY specific | STY2297 | ATGAGGA | TTATGCT | GTGAGGA | 0       |   |
| 3552 | CHIP5158 | STY specific | STY2364 | ATGATGA | TTACGCA | ATGATGA | 0       |   |
| 3553 | CHIP5308 | STY specific | STY4536 | ATGGCTT | TTAGGAC | ATGGCTT | 0       |   |
| 3554 | CHIP5323 | STY specific | STY4559 | ATGGCAA | TTACTGA | GTGGCAA | 0       |   |
| 3555 | CHIP5337 | STY specific | STY4576 | ATGAAAT | TTAATTT | ATGAAAT | 0       |   |
| 3556 | CHIP5353 | STY specific | STY4593 | ATGCTGG | TTAGGCG | ATGCTGG | 0       |   |
| 3557 | CHIP5286 | STY specific | STY4221 | ATGAAAT | TTAAAAA | ATGAAAT | 0       |   |
| 3558 | CHIP5309 | STY specific | STY4539 | ATGAACA | TTACGAC | ATGAACA | 0       |   |
| 3559 | buffer   | none         |         |         |         | buffer  | 0       |   |
| 3560 | empty    | none         |         |         |         | empty   | 0       |   |
| 3561 | empty    | none         |         |         |         | empty   | 0       |   |
| 3562 | empty    | none         |         |         |         | empty   | 0       |   |
| 3563 | empty    | none         |         |         |         | empty   | 0       |   |
| 3564 | empty    | none         |         |         |         | empty   | 0       |   |
| 3565 | CHIP2641 | STM/STY      | STM0072 | STY0082 | ATGATGA | TTAATCC | ATGATGA | 1 |
| 3566 | CHIP3241 | STM/STY      | STM3315 | STY3494 | ATGTCGC | TTACACG | ATGTCGC | 1 |
| 3567 | CHIP3257 | STM/STY      | STM3354 | STY3534 | ATGACTA | TTATTTG | ATGACTA | 1 |
| 3568 | CHIP3273 | STM/STY      | STM3388 | STY3568 | ATGCCGG | TTATTTT | ATGCCGG | 1 |
| 3569 | CHIP3297 | STM specil   | STM0658 |         | ATGAATA | TTAGAAA | ATGAATA | 1 |
| 3570 | CHIP3313 | STM/STY      | STM0692 | STY0730 | ATGGAGC | TTAGTAA | ATGGAGC | 1 |
| 3571 | CHIP2715 | STM/STY      | STM0220 | STY0243 | ATGAAGC | TTAGCGT | ATGAAGC | 1 |
| 3572 | CHIP2731 | STM/STY      | STM1505 | STY1556 | ATGAAGA | TTACCAG | ATGAAGA | 1 |
| 3573 | CHIP2747 | STM/STY      | STM1536 | STY1527 | ATGGCAG | TTATGAT | ATGGCAG | 1 |
| 3574 | CHIP0789 | STM/STY      | STM4455 | STY4795 | ATGCAAA | TTAGGCG | ATGCAAA | 1 |
| 3575 | CHIP0805 | STM/STY      | STM2033 | STY2238 | ATGCATT | TTAGGCC | ATGCATT | 1 |
| 3576 | CHIP2612 | STM/STY      | STM0007 | STY0007 | ATGACGG | TTACAGC | ATGACGG | 1 |
| 3577 | CHIP0799 | STM/STY      | STM1724 | STY1327 | ATGGCTG | TTACCTT | ATGGCTG | 1 |

|      |          |              |         |         |                            |   |
|------|----------|--------------|---------|---------|----------------------------|---|
| 3578 | CHIP0815 | STM/STY      | STM2023 | STY2226 | ATGAAAC TTAATGT(ATGAAAC    | 1 |
| 3579 | CHIP0831 | STM/STY      | STM1726 | STY1325 | ATGACAA TTAGATT ATGACAA    | 1 |
| 3580 | CHIP2638 | STM specil   | STM0065 |         | ATGCGGT TTATAAA/ ATGCGGT   | 1 |
| 3581 | CHIP2654 | STM/STY      | STM0096 | STY0111 | ATGCCTT TTATTGG ATGCCTT    | 1 |
| 3582 | CHIP3246 | STM/STY      | STM3333 | STY3513 | ATGTCGC TTATTGT GTGTCGC    | 1 |
| 3583 | CHIP3792 | STM specil   | STM1050 |         | ATGACTT TTA CTGG ATGACTT   | 1 |
| 3584 | CHIP3816 | STM/STY      | STM1096 | STY1128 | ATGACAA TTAACCA ATGACAA    | 1 |
| 3585 | CHIP3832 | STM/STY      | STM1129 | STY1166 | ATGTCAC TTAGCGT ATGTCAC    | 1 |
| 3586 | CHIP3848 | STM/STY      | STM1167 | STY1205 | ATGTTTG TTAACGC ATGTTTG    | 1 |
| 3587 | CHIP3864 | STM/STY      | STM1210 | STY1250 | ATGATTA TTATCCC ATGATTA    | 1 |
| 3588 | CHIP3888 | STM/STY      | STM1273 | STY1848 | ATGAAAC TTATTTT(ATGAAAC    | 1 |
| 3589 | CHIP3842 | STM/STY      | STM1155 | STY1192 | ATGACGA TTAATAG(ATGACGA    | 1 |
| 3590 | CHIP3858 | STM/STY      | STM1202 | STY1241 | ATGTTTT TTAACGG ATGTTTT    | 1 |
| 3591 | CHIP2434 | STM/STY      | STM3526 | STY4277 | ATGGAAA TTACGAC ATGGAAA    | 1 |
| 3592 | CHIP2450 | STM/STY      | STM3551 | STY4260 | ATGAAAC TTAGTAT(ATGAAAC    | 1 |
| 3593 | CHIP3715 | STM/STY      | STM4542 | STY4895 | ATGAATA TTAGGAG ATGAATA    | 1 |
| 3594 | CHIP3731 | STM/STY      | STM4584 | STY4931 | ATGCACC TTATCGA ATGCACC    | 1 |
| 3595 | CHIP3892 | STM/STY      | STM1277 | STY1841 | ATGCGAA TTACAGC ATGCGAA    | 1 |
| 3596 | CHIP3717 | STM/STY      | STM4546 | STY4899 | ATGACGA TTATACC(GTGACGA    | 1 |
| 3597 | CHIP3733 | STM/STY      | STM4586 | STY4933 | ATGGATC TTAACGG ATGGATC    | 1 |
| 3598 | CHIP3749 | STM/STY      | STM0274 | STY0298 | ATGGCAA TTAGGCA ATGGCAA    | 1 |
| 3599 | CHIP4061 | STM specil   | STM2754 |         | ATGCTGG TTAAGCA ATGCTGG    | 1 |
| 3600 | CHIP4077 | STM/STY      | STM2775 | STY2892 | ATGAGAC TTATCGG ATGAGAC    | 1 |
| 3601 | CHIP3727 | STM specil   | STM4573 |         | ATGCCAG TTACGGC ATGCCAG    | 1 |
| 3602 | CHIP3751 | STM specil   | STM0277 |         | ATGAACA TTACGGC ATGAACA    | 1 |
| 3603 | CHIP3767 | STM specil   | STM0299 |         | ATGGTTA TTAAGGT GTGGTTA    | 1 |
| 3604 | CHIP4079 | STM/STY      | STM2777 | STY2894 | ATGGGTA TTA AAAAC(ATGGGTA  | 1 |
| 3605 | CHIP4095 | STM/STY      | STM4008 |         | ATGATGG TTA AAAAC(ATGATGG  | 1 |
| 3606 | CHIP3823 | STM/STY      | STM1106 | STY1140 | ATGAAAA TTAATAG/ ATGAAAA   | 1 |
| 3607 | CHIP3057 | STM/STY      | STM2405 | STY2646 | ATGCAAA TTATCCC(ATGCAAA    | 1 |
| 3608 | CHIP3073 | STM/STY      | STM2449 | STY2686 | ATGACAC TTAGTAC GTGACAC    | 1 |
| 3609 | CHIP3089 | STM/STY      | STM2490 | STY2728 | ATGACAC TTA CTTA TTGACAC   | 1 |
| 3610 | CHIP3489 | STM/STY      | STM0968 | STY0966 | ATGTCCA TTAGATG ATGTCCA    | 1 |
| 3611 | CHIP3505 | STM/STY      | STM0993 | STY0995 | ATGTCAT TTATTCT ATGTCAT    | 1 |
| 3612 | CHIP4098 | STM/STY      | STM4015 | STY3863 | ATGTTCT TTA CT CG TTGTTCT  | 0 |
| 3613 | CHIP3115 | STM/STY      | STM2545 | STY2791 | ATGCTGC TTA CT TG(ATGCTGC  | 1 |
| 3614 | CHIP3131 | STM specil   | STM2587 |         | ATGATTA TTA AACG ATGATTA   | 1 |
| 3615 | CHIP4116 | STM/STY      | STM4079 | STY3791 | ATGACTG TTAAGGC ATGACTG    | 1 |
| 3616 | CHIP4140 | STM/STY      | STM4118 | STY3755 | ATGCAAT TTATTGA ATGCAAT    | 1 |
| 3617 | CHIP3596 | STM/STY      | STM4308 | STY4509 | ATGCTTT TTA GAAA ATGCTTT   | 1 |
| 3618 | CHIP4188 | STM specil   | STM2943 |         | ATGGACA TTA TTA C ATGGACA  | 1 |
| 3619 | CHIP3094 | STM/STY      | STM2503 | STY2744 | ATGAAAC TTA CT GA ATGAAAC  | 1 |
| 3620 | CHIP3118 | STM/STY      | STM2558 | STY2805 | ATGAGTT TTA AAGC ATGAGTT   | 1 |
| 3621 | CHIP3134 | STM specific |         |         | ATGGCAA TTA GCGG ATGGCAA   | 0 |
| 3622 | CHIP4111 | STM/STY      | STM4068 | STY3802 | ATGGGTA TTA GTGA TTGGGTA   | 1 |
| 3623 | CHIP4135 | STM specil   | STM4113 |         | ATGACTA TTA CCG ATGACTA    | 1 |
| 3624 | CHIP4151 | STM/STY      | STM2857 | STY2979 | ATGCGTT TTA AACT ATGCGTT   | 1 |
| 3625 | CHIP3681 | STM specil   | STM4490 |         | ATGATCC TTA TGCA ATGATCC   | 1 |
| 3626 | CHIP3697 | STM/STY      | STM4515 | STY4872 | ATGGTTC TTA TTA C ATGGTTC  | 1 |
| 3627 | CHIP0194 | STM/STY      | STM2055 | STY2260 | ATGGAAA TTA CGTC ATGGAAA   | 1 |
| 3628 | CHIP2293 | STM/STY      | STM1271 | STY1850 | ATGCGGC TTA TTA CT ATGCGGC | 1 |
| 3629 | CHIP2317 | STM/STY      | STM1483 | STY1584 | ATGCAAC TTA GGC ATGCAAC    | 1 |

|      |          |            |         |         |                          |   |
|------|----------|------------|---------|---------|--------------------------|---|
| 3630 | CHIP2341 | STM/STY    | STM1234 | STY1274 | ATGATAG TTAGACC GTGATAG  | 1 |
| 3631 | CHIP2335 | STM/STY    | STM1213 | STY1253 | ATGACAA TTAGGAC ATGACAA  | 1 |
| 3632 | CHIP0276 | STM/STY    | STM3478 | STY4318 | ATGAACC TTAACGA ATGAACC  | 1 |
| 3633 | CHIP2948 | STM/STY    | STM1940 | STY2149 | ATGATGA TTATTCT ATGATGA  | 1 |
| 3634 | CHIP3644 | STM specil | STM4417 |         | ATGTCTA TTAATCC ATGTCTA  | 1 |
| 3635 | CHIP3660 | STM specil | STM4434 |         | ATGAAAG TTATTTCT ATGAAAG | 1 |
| 3636 | CHIP3676 | STM specil | STM4484 |         | ATGGAAG TTAGAAA ATGGAAG  | 1 |
| 3637 | CHIP3646 | STM specil | STM4419 |         | ATGTCTC TTAGGCT ATGTCTC  | 1 |
| 3638 | CHIP3662 | STM specil | STM4436 |         | ATGAAAA TTAACGT ATGAAAA  | 1 |
| 3639 | CHIP3678 | STM/STY    | STM4486 | STY4820 | ATGACGA TTAGAAG ATGACGA  | 1 |
| 3640 | CHIP3022 | STM/STY    | STM2341 | STY2571 | ATGAACG TTAATCA ATGAACG  | 1 |
| 3641 | CHIP0199 | STM/STY    | STM1925 | STY2134 | ATGGGAA TTATGCC ATGGGAA  | 1 |
| 3642 | CHIP2306 | STM/STY    | STM1341 | STY1769 | ATGCAAA TTATTTTC ATGCAAA | 1 |
| 3643 | CHIP3992 | STM/STY    | STM2080 | STY2289 | ATGAAAA TTAATCA ATGAAAA  | 1 |
| 3644 | CHIP1420 | STM/STY    | STM3836 | STY3942 | ATGTCAC TTAATCC ATGTCAC  | 1 |
| 3645 | CHIP1436 | STM/STY    | STM2568 | STY2814 | ATGCCGC TTATACT ATGCCGC  | 1 |
| 3646 | CHIP1364 | STM/STY    | STM0207 | STY0229 | ATGAAAA TTAGCCA ATGAAAA  | 1 |
| 3647 | CHIP1388 | STM/STY    | STM0127 | STY0147 | ATGCGTT TTATCGA ATGCGTT  | 1 |
| 3648 | CHIP1404 | STM/STY    | STM0108 | STY0125 | ATGTTAA TTAACGG GTGTTAA  | 1 |
| 3649 | CHIP1494 | STM/STY    | STM2385 | STY2617 | ATGGATA TTAATCT GTGGATA  | 1 |
| 3650 | CHIP3915 | STM/STY    | STM1321 | STY1790 | ATGGGTT TTAATCA ATGGGTT  | 1 |
| 3651 | CHIP0508 | STM/STY    | STM1978 | STY2186 | ATGATGA TTAGGAT ATGATGA  | 1 |
| 3652 | CHIP0524 | STM/STY    | STM2147 | STY2376 | ATGCAGC TTAATTC ATGCAGC  | 1 |
| 3653 | CHIP3971 | STM/STY    | STM1469 | STY1653 | ATGGTAA TTAACGT ATGGTAA  | 1 |
| 3654 | CHIP3995 | STM specil | STM2089 |         | ATGACCT TTATAAC ATGACCT  | 1 |
| 3655 | CHIP3997 | STM/STY    | STM2094 | STY2304 | ATGATGA TTAATCT GTGATGA  | 1 |
| 3656 | CHIP1425 | STM/STY    | STM3852 | STY3931 | ATGTCCC TTAACGC ATGTCCC  | 1 |
| 3657 | CHIP1353 | STM/STY    | STM0218 | STY0241 | ATGGCTA TTATTCC ATGGCTA  | 1 |
| 3658 | CHIP1465 | STM/STY    | STM0422 | STY0461 | ATGAGTT TTATGCC ATGAGTT  | 1 |
| 3659 | CHIP1393 | STM/STY    | STM0136 | STY0156 | ATGCTAA TTAGCTC ATGCTAA  | 1 |
| 3660 | CHIP1505 | STM/STY    | STM2320 | STY2550 | ATGGAAT TTATGCG ATGGAAT  | 1 |
| 3661 | CHIP0977 | STM specil | STM1054 |         | ATGATAG TTACAGG ATGATAG  | 1 |
| 3662 | CHIP1001 | STM/STY    | STM1016 | STY1024 | ATGGCCC TTATTGG ATGGCCC  | 0 |
| 3663 | CHIP1564 | STM/STY    | STM0502 | STY0548 | ATGACAG TTATGCT ATGACAG  | 1 |
| 3664 | CHIP1580 | STM/STY    | STM0493 | STY0538 | ATGGCCA TTATGCT ATGGCCA  | 1 |
| 3665 | CHIP1988 | STM/STY    | STM4341 | STY4701 | ATGACGA TTACCAG ATGACGA  | 1 |
| 3666 | CHIP3152 | STM specil | STM2608 |         | ATGATTT TTAGTGA ATGATTT  | 1 |
| 3667 | CHIP3162 | STM/STY    | STM1021 | STY1035 | ATGGCTA TTATGCG ATGGCTA  | 0 |
| 3668 | CHIP3178 | STM/STY    | STM3186 | STY3364 | ATGCAAA TTAATGC ATGCAAA  | 1 |
| 3669 | CHIP3194 | STM/STY    | STM3218 | STY3396 | ATGAAAG TTAACC ATGAAAG   | 1 |
| 3670 | CHIP3210 | STM/STY    | STM3261 | STY3444 | ATGAAAT TTAGGAA ATGAAAT  | 1 |
| 3671 | CHIP1511 | STM/STY    | STM2296 | STY2526 | ATGCTGG TTAGCCG GTGCTGG  | 1 |
| 3672 | CHIP1543 | STM/STY    | STM2427 | STY2663 | ATGGAAC TTAGGCA ATGGAAC  | 1 |
| 3673 | CHIP1569 | STM/STY    | STM0519 | STY0567 | ATGAAAC TTAGGAC ATGAAAC  | 1 |
| 3674 | CHIP1046 | STM/STY    | STM0028 | STY0033 | ATGTATT TTAGTCA ATGTATT  | 0 |
| 3675 | CHIP3141 | STM specil | STM2597 |         | ATGATGG TTATGAC ATGATGG  | 1 |
| 3676 | CHIP3157 | STM specil | STM2613 |         | ATGAATG TTAATGA ATGAATG  | 0 |
| 3677 | CHIP3173 | STM/STY    | STM2652 | STY2845 | ATGTTGT TTACAGG ATGTTGT  | 1 |
| 3678 | CHIP3189 | STM/STY    | STM3205 | STY3384 | ATGATGA TTAGAAG TTGATGA  | 1 |
| 3679 | CHIP2059 | STM/STY    | STM3586 | STY4224 | ATGACGT TTACCC ATGACGT   | 1 |
| 3680 | CHIP3223 | STM/STY    | STM3280 | STY3461 | ATGATGA TTACGCA ATGATGA  | 1 |
| 3681 | CHIP0593 | STM/STY    | STM0419 | STY0458 | ATGGCAT TTATGGC ATGGCAT  | 1 |

|      |          |            |         |          |                         |   |
|------|----------|------------|---------|----------|-------------------------|---|
| 3682 | CHIP0609 | STM/STY    | STM2440 | STY2677  | ATGAATA(TTAAATC(GTGAATA | 1 |
| 3683 | CHIP0721 | STM/STY    | STM0845 | STY0884  | ATGGCGC(TTACTGC(ATGGCGC | 1 |
| 3684 | CHIP0737 | STM/STY    | STM0264 | STY0285  | ATGAGCA(TTACGCC(ATGAGCA | 1 |
| 3685 | CHIP0580 | STM/STY    | STM1422 | STY1698  | ATGAGCG(TTATGGT(ATGAGCG | 1 |
| 3686 | CHIP0692 | STM/STY    | STM2352 | STY2582  | ATGATTG(TTATTTA(GTGATTG | 1 |
| 3687 | CHIP0620 | STM/STY    | STM0013 | STY0013  | ATGGCGA(TTAGCGA(ATGGCGA | 1 |
| 3688 | CHIP0636 | STM/STY    | STM1737 | STY1314  | ATGACCC(TTACTCA(ATGACCC | 1 |
| 3689 | CHIP0756 | STM/STY    | STM2455 | STY2692  | ATGATCA(TTAATTT(ATGATCA | 1 |
| 3690 | CHIP1807 | STM/STY    | STM4078 | STY3792  | ATGGCTG(TTAACTT(ATGGCTG | 1 |
| 3691 | CHIP0727 | STM/STY    | STM0066 | STY0076  | ATGATTA(TTATTTT(TTGATTA | 1 |
| 3692 | CHIP0751 | STM/STY    | STM2460 | STY2697  | ATGGGAA(TTATGTT(ATGGGAA | 1 |
| 3693 | CHIP1802 | STM/STY    | STM4123 | STY3750  | ATGGCAC(TTACAAC(ATGGCAC | 1 |
| 3694 | CHIP1834 | STM/STY    | STM0758 | STY0799  | ATGGCGC(TTAATGG(ATGGCGC | 1 |
| 3695 | CHIP1866 | STM/STY    | STM0746 | STY0792  | ATGGCCA(TTAGATT(ATGGCCA | 1 |
| 3696 | CHIP0584 | STM/STY    | STM2807 | STY2932  | ATGGCAA(TTATAGC(TTGGCAA | 1 |
| 3697 | CHIP0386 | STM/STY    | STM1519 | STY1541  | ATGACGA(TTAGTAG(ATGACGA | 1 |
| 3698 | CHIP0402 | STM/STY    | STM2879 | STY3002  | ATGGGTT(TTATACT(TTGGGTT | 1 |
| 3699 | CHIP1253 | STM/STY    | STM1680 | STY1383  | ATGACTG(TTACGAC(ATGACTG | 1 |
| 3700 | CHIP1277 | STM/STY    | STM3378 | STY3558  | ATGCGTC(TTAGCGC(GTGCCTC | 1 |
| 3701 | CHIP0466 | STM/STY    | STM0239 | STY0264  | ATGGCGC(TTATGAG(ATGGCGC | 1 |
| 3702 | CHIP0107 | STM/STY    | STM1231 | STY1271  | ATGATGC(TTAGCGC(ATGATGC | 1 |
| 3703 | CHIP0125 | STM/STY    | STM4168 | STY3717  | ATGGATC(TTAGCGC(ATGGATC | 1 |
| 3704 | CHIP4724 | STM/STY    | STM2375 | STY2606  | ATGAGTT(TTAATTC(ATGAGTT | 1 |
| 3705 | CHIP3628 | STM/STY    | STM4377 | STY4733  | ATGATGT(TTACCCG(ATGTCTT | 1 |
| 3706 | CHIP0389 | STM/STY    | STM1393 | STY1727  | ATGTCTG(TTATACC(ATGTCTG | 1 |
| 3707 | CHIP0405 | STM/STY    | STM1193 | STY1232  | ATGTATA(TTAGAAA(ATGTATA | 1 |
| 3708 | CHIP1256 | STM/STY    | STM1704 | STY1347  | ATGAACT(TTAAACG(ATGAACT | 1 |
| 3709 | CHIP1250 | STM/STY    | STM1904 | STY2112  | ATGGTAA(TTAATAC(ATGGTAA | 1 |
| 3710 | CHIP0447 | STM/STY    |         |          | ATGCCAG(TTAGCCC(ATGCCAG | 0 |
| 3711 | CHIP0463 | STM specil | STM1008 |          | ATGTGCG(TTAGCCG(ATGTGCG | 0 |
| 3712 | CHIP0479 | STM/STY    | STM1142 | STY1179  | ATGTTTA(TTACCGC(ATGTTTA | 1 |
| 3713 | CHIP4687 | STM/STY    | STM0717 | STY0757  | ATGCAGC(TTAGTAC(GTGCAGC | 1 |
| 3714 | CHIP0128 | STM/STY    | STM4171 | STY3714  | ATGAACA(TTAAAAG(GTGAACA | 1 |
| 3715 | CHIP0010 | STM/STY    | STM3978 | STY3581  | ATGGACC(TTATTTA(ATGGACC | 1 |
| 3716 | CHIP0034 | STM/STY    | STM3953 | STY3606  | ATGGACA(TTACAGG(ATGGACA | 1 |
| 3717 | CHIP0066 | STM/STY    | STM3915 | STY3639  | ATGAGCG(TTACGCC(ATGAGCG | 1 |
| 3718 | CHIP2868 | STM/STY    | STM1764 | STY1288  | ATGGAGT(TTATTTT(AGAGTAA | 1 |
| 3719 | CHIP1709 | STM/STY    | STM1822 | STY1952  | ATGTCTA(TTATACC(ATGTCTA | 1 |
| 3720 | CHIP1725 | STM/STY    | STM1738 | STY1313  | ATGCTGT(TTAAAAG(GTGCTGT | 1 |
| 3721 | CHIP1735 | STM/STY    | STM3010 | STY3153  | ATGCTGT(TTACTCA(ATGCTGT | 1 |
| 3722 | CHIP1759 | STM/STY    | STM2897 | STY3020  | ATGATTC(TTAAGAC(ATGATTC | 1 |
| 3723 | CHIP0948 | STM/STY    | STM2699 | STY4605  | ATGAGCG(TTAGGCT(ATGAGCG | 1 |
| 3724 | CHIP0185 | STM/STY    | STM2046 | STY2251  | ATGAGGA(TTACCTC(AGGAGCA | 1 |
| 3725 | CHIP0539 | STM/STY    | STM1576 | STY1489  | ATGACAC(TTATTGT(ATGACAC | 1 |
| 3726 | CHIP0045 | STM/STY    | STM3941 | STY3618  | ATGGATG(TTATTGT(ATGGATG | 1 |
| 3727 | CHIP0055 | STM/STY    | STM3927 | STY3628  | ATGACTG(TTATTCG(ATGACTG | 1 |
| 3728 | CHIP0079 | STM/STY    | STM3900 | STY3656A | ATGACAG(TTAAGCC(ATGACAG | 1 |
| 3729 | CHIP3133 | STM specil | STM2589 |          | ATGATGG(TTAGAGA(ATGGGAA | 0 |
| 3730 | CHIP1714 | STM/STY    | STM1807 | STY1936  | ATGTTGC(TTAACGA(ATGTTGC | 1 |
| 3731 | CHIP1730 | STM/STY    | STM1715 | STY1335  | ATGCATA(TTAATCA(ATGCATA | 1 |
| 3732 | CHIP1754 | STM/STY    | STM2934 | STY3059  | ATGAACA(TTATGCA(ATGAACA | 1 |
| 3733 | CHIP1133 | STM/STY    | STM1880 | STY2086  | ATGGCTA(TTAGCCT(ATGGCTA | 1 |



|      |          |            |          |         |                          |   |
|------|----------|------------|----------|---------|--------------------------|---|
| 3734 | CHIP1149 | STM/STY    | STM0617  | STY0666 | ATGAACA TTAATAAC ATGAACA | 1 |
| 3735 | CHIP1173 | STM/STY    | STM1545  | STY1517 | ATGAATA TTATTCT ATGAATA  | 1 |
| 3736 | CHIP4457 | STM/STY    | STM0598  | STY0642 | ATGACCG TTAGGCT ATGACCG  | 1 |
| 3737 | CHIP1213 | STM/STY    | STM1612  | STY1452 | ATGACCT TTATGGT ATGACCT  | 1 |
| 3738 | CHIP2761 | STM specil | STM1555  |         | ATGGCGA TTACCGT ATGGCGA  | 1 |
| 3739 | CHIP2779 | STM/STY    | STM1587  | STY1478 | ATGTCAC TTATTCA ATGTCAC  | 1 |
| 3740 | CHIP2795 | STM/STY    | STM1615  | STY1449 | ATGAGTT TTATTGT ATGAGTT  | 1 |
| 3741 | CHIP2811 | STM/STY    | STM1634  | STY1437 | ATGTCAT TTAACTG ATGTCAT  | 1 |
| 3742 | CHIP2931 | STM/STY    | STM1892  | STY2100 | ATGAAAT TTATGAG GTGAAAT  | 1 |
| 3743 | CHIP1128 | STM/STY    | STM0892  | STY0925 | ATGCGCT TTAACGG ATGCGCT  | 1 |
| 3744 | CHIP4412 | STM/STY    | STM0522  | STY0569 | ATGGTCG TTAACCT ATGGTCG  | 1 |
| 3745 | CHIP4414 | STM/STY    | STM0523  | STY0571 | ATGTCTT TTAAGTC ATGTCTT  | 1 |
| 3746 | CHIP1178 | STM/STY    | STM0961  | STY0959 | ATGATGA TTAAGTC ATGATGA  | 1 |
| 3747 | CHIP1202 | STM/STY    | STM1640  | STY1429 | ATGAATA TTAGCGT ATGAATA  | 1 |
| 3748 | CHIP2862 | STM/STY    | STM1747  |         | ATGCAGC TTAAGA GTGCAGC   | 1 |
| 3749 | CHIP2878 | STM/STY    | STM1792  | STY1919 | ATGTGGC TTATCCC ATGTGGC  | 1 |
| 3750 | CHIP2894 | STM/STY    | STM1828  | STY1958 | ATGGAAT TTATTCC ATGGAAT  | 1 |
| 3751 | CHIP4600 | STM/STY    | STM3074  | STY3232 | ATGGTTA TTAACAT ATGGTTA  | 1 |
| 3752 | CHIP2504 | STM/STY    | STM3672  | STY4126 | ATGGCCG TTAATTA ATGGCCG  | 1 |
| 3753 | CHIP4640 | STM specil | STM1553  |         | ATGTTCA TTATTTA ATGTTCA  | 1 |
| 3754 | CHIP2552 | STM/STY    | STM3799  | STY3980 | ATGTTTA TTATGGG GTGTTTA  | 1 |
| 3755 | CHIP4209 | STM/STY    | STM2986  | STY3126 | ATGTTTG TTAGCGA ATGTTTG  | 1 |
| 3756 | CHIP4241 | STM/STY    | STM3065  | STY3221 | ATGAAGT TTAAGTC GTGAAGT  | 1 |
| 3757 | CHIP4267 | STM specil | STM3120  |         | ATGCCCG TTAGGAA ATGCCCG  | 1 |
| 3758 | CHIP4283 | STM/STY    | STM3154  |         | ATGGAGC TTAATC ATGGAGC   | 1 |
| 3759 | CHIP4587 | STM/STY    | STM2840  | STY2962 | ATGTCTA TTATTTT ATGTCTA  | 1 |
| 3760 | CHIP4611 | STM/STY    | STM3086  | STY3240 | ATGTCTG TTAAGTC ATGTCTG  | 1 |
| 3761 | CHIP4627 | STM specil | STM4186  |         | ATGAAAT TTACGGC CTGAAAT  | 1 |
| 3762 | CHIP4643 | STM/STY    | STM3654  | STY4146 | ATGACTG TTAATTT GGTACTG  | 1 |
| 3763 | CHIP4246 | STM specil | STM3080  |         | ATGCTAT TTAGCTT ATGCTAT  | 1 |
| 3764 | CHIP4262 | STM/STY    |          |         | ATGAAAT TTACTTT ATGAAAT  | 0 |
| 3765 | CHIP4374 | STM/STY    | STM0455  | STY0497 | ATGAAAC TTACCTT ATGAAAC  | 1 |
| 3766 | CHIP2470 | STM/STY    | STM3590  | STY4213 | ATGATAA TTAGTGC ATGATAA  | 1 |
| 3767 | CHIP4614 | STM/STY    | STM3108  | STY3263 | ATGGCAA TTAGTCC ATGGCAA  | 1 |
| 3768 | CHIP4630 | STM/STY    |          |         | ATGCGCA TTAATAA AGCCGCA  | 0 |
| 3769 | CHIP1956 | STM/STY    | STM4438  | STY4777 | ATGTTAC TTATTGT ATGTTAC  | 1 |
| 3770 | CHIP1972 | STM/STY    | STM4561  | STY4911 | ATGACTA TTAAGTC ATGACTA  | 1 |
| 3771 | CHIP1605 | STM/STY    | STM2812  | STY2938 | ATGACGA TTAATTT ATGACGA  | 1 |
| 3772 | CHIP1629 | STM/STY    | STM2128  | STY2341 | ATGCGCT TTATATC ATGCGCT  | 1 |
| 3773 | CHIP1645 | STM/STY    | STM2215  | STY2451 | ATGCTAA TTACCAT ATGCTAA  | 1 |
| 3774 | CHIP1661 | STM/STY    | STM2099  | STY2309 | ATGCCCG TTACCCT ATGCCCG  | 1 |
| 3775 | CHIP1631 | STM/STY    | STM2131  | STY2344 | ATGACTG TTATACC ATGACTG  | 1 |
| 3776 | CHIP4531 | STM/STY    | STM2203  | STY2438 | ATGAAAT TTAGGCC ATGAAAT  | 1 |
| 3777 | CHIP1671 | STM/STY    | STM2122  | STY2335 | ATGACTG TTATTCA ATGACTG  | 1 |
| 3778 | CHIP1687 | STM/STY    | STM1846  | STY1977 | ATGGAAA TTAGAAC ATGGAAA  | 1 |
| 3779 | CHIP2087 | STM/STY    | STM3695  | STY4101 | ATGCTTA TTACGAC ATGCTTA  | 1 |
| 3780 | CHIP2103 | STM/STY    | STM3645  | STY4157 | ATGAAAA TTAAGTC ATGAAAA  | 1 |
| 3781 | CHIP1681 | STM/STY    | STM2192  | STY2426 | ATGATTA TTATCTG ATGATTA  | 1 |
| 3782 | CHIP1697 | STM/STY    | STM1775  | STY1900 | ATGGATT TTATGGC ATGGATT  | 1 |
| 3783 | CHIP2097 | STM/STY    | STM3670  | STY4128 | ATGAAAA TTAGCGG ATGAAAA  | 1 |
| 3784 | CHIP1929 | STM/STY    | STM1869A |         | ATGAATG TTATACC ATGAATG  | 0 |
| 3785 | CHIP1945 | STM/STY    | STM4375  | STY4731 | ATGGCAA TTAGCCT ATGGCAA  | 1 |

|      |          |              |         |         |                           |   |
|------|----------|--------------|---------|---------|---------------------------|---|
| 3786 | CHIP2161 | STM/STY      | STM3183 | STY3361 | ATGGAAA TTAGTAT( TTGGAAA  | 1 |
| 3787 | CHIP2147 | STM/STY      | STM3273 | STY3456 | ATGTTAG TTAGCAT( GTGTTAG  | 1 |
| 3788 | CHIP2163 | STM/STY      | STM3158 | STY3331 | ATGGCAA TTATTTCC( ATGGCAA | 1 |
| 3789 | CHIP2179 | STM/STY      | STM3067 | STY3223 | ATGGAAG TTAAGCT( ATGGAAG  | 1 |
| 3790 | CHIP2196 | STM/STY      | STM3325 | STY3504 | ATGATCC TTAAGCT( ATGATCC  | 1 |
| 3791 | CHIP0329 | STM/STY      | STM3759 | STY4027 | ATGTCCT TTACCCA( ATGTCCT  | 1 |
| 3792 | CHIP2236 | STM/STY      | STM3164 | STY3337 | ATGAACA TTAGCGC( ATGAACA  | 1 |
| 3793 | CHIP0316 | STM/STY      | STM1660 | STY1404 | ATGATCC TTAAGCG( ATGATCC  | 1 |
| 3794 | CHIP0332 | STM/STY      | STM3763 | STY4023 | ATGACTG TTAAGCG( ATGACTG  | 1 |
| 3795 | CHIP2239 | STM/STY      | STM3156 | STY3329 | ATGAAAG TTATTTT( ATGAAAG  | 1 |
| 3796 | CHIP2255 | STM/STY      | STM3077 | STY3237 | ATGAAA' TTATTTG( ATGAAA'  | 1 |
| 3797 | CHIP2271 | STM/STY      | STM1083 | STY1110 | ATGTCGA TTAATAC( ATGTCGA  | 1 |
| 3798 | CHIP3363 | STM/STY      | STM0785 | STY0818 | ATGAAAC TTAGTAC( ATGAAAC  | 1 |
| 3799 | CHIP2250 | STM/STY      | STM3097 | STY3250 | ATGAGCC TTAATAC( ATGAGCC  | 1 |
| 3800 | CHIP2266 | STM/STY      | STM1063 | STY1084 | ATGTGTG TTAGGAC( ATGTGTG  | 1 |
| 3801 | CHIP3342 | STM/STY      | STM0748 | STY0794 | ATGATGA TTACAGA( ATGATGA  | 1 |
| 3802 | CHIP3374 | STM/STY      | STM0795 | STY0828 | ATGAGTT TTATTCA( ATGAGTT  | 1 |
| 3803 | CHIP3406 | STM/STY      | STM0842 | STY0881 | ATGACCG TTAGAAG( ATGACCG  | 1 |
| 3804 | CHIP0304 | STM/STY      | STM1599 | STY1465 | ATGGTAA TTAGGGT( ATGGTAA  | 1 |
| 3805 | CHIP4366 | STM/STY      | STM0440 | STY0482 | ATGAGTC TTAGTGC( ATGAGTC  | 1 |
| 3806 | CHIP4233 | STM/STY      | STM3034 | STY3183 | ATGCACA TTAATAA( ATGCACA  | 1 |
| 3807 | CHIP4259 | STM/STY      | STM3102 | STY3255 | ATGAGTG TTAATCA( ATGAGTG  | 1 |
| 3808 | CHIP4393 | STM/STY      | STM0485 | STY0529 | ATGTTTG TTAGAAT( ATGTTTG  | 1 |
| 3809 | CHIP4449 | STM/STY      | STM0587 | STY0630 | ATGGAAT TTATTTCC( ATGGAAT | 1 |
| 3810 | CHIP1536 | STM/STY      | STM2498 | STY2739 | ATGAAGA TTATTTG( ATGAAGA  | 1 |
| 3811 | CHIP3525 | STM specil   | STM1034 |         | ATGGCTA TTAGCCA( GTGGCTA  | 1 |
| 3812 | CHIP4557 | STM/STY      | STM2148 | STY2377 | ATGAAA' TTATCGA( ATGAAA'  | 1 |
| 3813 | CHIP4487 | STM/STY      | STM0355 | STY0385 | ATGCAGT TTACCTC( ATGCAGT  | 1 |
| 3814 | CHIP1020 | STM/STY      | STM0411 | STY0449 | ATGGCTA TTATCGT( ATGGCTA  | 1 |
| 3815 | CHIP2036 | STM/STY      | STM3702 | STY4093 | ATGGCCA TTAACGC( ATGGCCA  | 1 |
| 3816 | CHIP1990 | STM/STY      | STM4379 | STY4735 | ATGATTA TTATTGA( ATGATTA  | 1 |
| 3817 | CHIP4150 | STM/STY      | STM2856 | STY2978 | ATGTGCA TTATCTC( ATGTGCA  | 1 |
| 3818 | CHIP2326 | STM/STY      | STM1118 | STY1154 | ATGCCAA TTATACG( ATGCCAA  | 1 |
| 3819 | CHIP2343 | STM/STY      | STM1249 | STY1875 | ATGATGA TTAGTTA( ATGATGA  | 1 |
| 3820 | CHIP2299 | STM/STY      | STM1314 | STY1799 | ATGTTTG TTATTTCC( ATGTTTG | 1 |
| 3821 | CHIP2544 | STM/STY      | STM3772 | STY4013 | ATGCCTG TTAGAGT( ATGCCTG  | 1 |
| 3822 | CHIP2545 | STM/STY      | STM3773 | STY4012 | ATGCGGT TTAACTA( ATGCGGT  | 1 |
| 3823 | CHIP2632 | STM/STY      | STM0056 | STY0065 | ATGAACG TTAACG( ATGAACG   | 1 |
| 3824 | CHIP2617 | STM/STY      | STM0018 | STY0018 | ATGGCTA TTAGTAA( ATGGCTA  | 1 |
| 3825 | CHIP2633 | STM/STY      | STM0057 | STY0066 | ATGACCA TTACACC( ATGACCA  | 1 |
| 3826 | CHIP2618 | STM/STY      | STM0019 | STY0019 | ATGACCA TTATCTG( ATGACCA  | 1 |
| 3827 | CHIP2620 | STM/STY      | STM0029 | STY0035 | ATGAGAC TTAGATA( ATGAGAC  | 1 |
| 3828 | CHIP2652 | STM/STY      | STM0093 | STY0108 | ATGAAA' TTACATA( ATGAAA'  | 1 |
| 3829 | CHIP1004 | STM/STY      | STM1146 | STY1183 | ATGTCCG TTAATAT( ATGTCCG  | 1 |
| 3830 | CHIP2794 | STM/STY      | STM1613 | STY1451 | ATGATGA TTATTGT( ATGATGA  | 1 |
| 3831 | CHIP2827 | STM/STY      | STM1662 | STY1402 | ATGATCA TTAATCA( ATGATCA  | 1 |
| 3832 | CHIP2788 | STM/STY      | STM1603 | STY1461 | ATGCTTA TTAACGA( ATGCTTA  | 1 |
| 3833 | CHIP2758 | STM specil   | STM1551 |         | ATGGCAT TTATAAG( ATGGCAT  | 1 |
| 3834 | CHIP3200 | STM/STY      | STM3237 | STY3417 | ATGAGCA TTAGGCT( ATGAGCA  | 1 |
| 3835 | CHIP1091 | STM specil   | PSLT082 |         | ATGGGAA TTACGTA( ATGGGAA  | 1 |
| 3836 | CHIP1084 | STM specil   | PSLT070 |         | ATGATCC TTAGGGA( ATGATCC  | 1 |
| 3837 | CHIP1116 | STM specific |         |         | ATGATGA TTAGTCC( ATGATGA  | 0 |

|      |          |              |         |         |                           |   |
|------|----------|--------------|---------|---------|---------------------------|---|
| 3838 | CHIP1061 | STM specil   | PSLT031 |         | ATGAGTC TTATGAA(ATGAGTC   | 1 |
| 3839 | CHIP1093 | STM specil   | PSLT084 |         | ATGAACC TTAATTA/ATGAACC   | 1 |
| 3840 | CHIP0655 | STM specil   | PSLT035 |         | ATGTTAA(TTACCCC.ATGTTAA(  | 1 |
| 3841 | CHIP4905 | none         | R460058 |         | ATGCCAG TTAGATA(ATGCCAG   | 0 |
| 3842 | CHIP4906 | none         | R460059 |         | ATGAAAA TTAACAA(ATGAAAA   | 0 |
| 3843 | CHIP4894 | none         | R460039 |         | ATGTTTG(TTATTTG/ATGTTTG(  | 0 |
| 3844 | CHIP4900 | none         | R460053 |         | ATGTTGA TTATCTC(ATGTTGA   | 0 |
| 3845 | CHIP4888 | none         | R460033 |         | ATGTATC,TTACAGC ATGTATC,  | 0 |
| 3846 | CHIP4752 | STM specil   | PSLT023 |         | GACCTGG TCAGCGG GACCTGG   | 1 |
| 3847 | CHIP4828 | STM/STY      | STM2714 | STY4618 | TCGTTTA(ACGTTTC. TCGTTTA( | 1 |
| 3848 | CHIP4832 | STM/STY      |         |         | CAAACGC AAGGGAT CAAACGC   | 0 |
| 3849 | CHIP4836 | STM specific |         |         | GAACAAA AATACCG GAACAAA   | 0 |
| 3850 | CHIP4840 | STM specific |         |         | GTAACCA CTTCTGC GTAACCA   | 0 |
| 3851 | CHIP4844 | STM specil   | STM0923 |         | AAAATGA, TATCGAC AAAATGA, | 1 |
| 3852 | CHIP4848 | STM/STY      | STM3114 | STY3270 | TTCAGCC TCGCTAT, TTCAGCC  | 1 |
| 3853 | CHIP4934 | STY specific |         | STY0327 | ATGGAAC TTAAGAG ATGGAAC   | 0 |
| 3854 | CHIP4950 | STM/STY      |         | STY0746 | ATGAGTC TTACGCC ATGAGTC   | 0 |
| 3855 | CHIP4966 | STY specific |         | STY1031 | ATGGCGA TTATTCA1ATGGCGA   | 0 |
| 3856 | CHIP4982 | STY specific |         | STY1053 | ATGTGGA TTAAGAG(ATGTGGA   | 0 |
| 3857 | CHIP4997 | STY specific |         | STY1069 | ATGCGAT TTACGCC ATGCGAT   | 0 |
| 3858 | CHIP5105 | STY specific |         | STY2045 | ATGAAAA TTAAGAG ATGAAAA   | 0 |
| 3859 | CHIP4952 | STY specific |         | STY0945 | ATGCCCC TTAATCC ATGCCCC   | 0 |
| 3860 | CHIP4968 | STY specific |         | STY1033 | ATGCATA TTACATT1ATGCATA   | 0 |
| 3861 | CHIP4983 | STY specific |         | STY1055 | ATGAGTT TTAAGAG ATGAGTT   | 0 |
| 3862 | CHIP4999 | STY specific |         | STY1071 | ATGAGCA TTAGAGT.ATGAGCA   | 0 |
| 3863 | CHIP5107 | STY specific |         | STY2047 | ATGAGAG TTATTGA/ATGAGAG   | 0 |
| 3864 | CHIP5122 | STY specific |         | STY2063 | ATGGCTT TTACCCC ATGGCTT   | 0 |
| 3865 | CHIP5056 | STY specific |         | STY1633 | ATGACTG TTAATGG ATGACTG   | 0 |
| 3866 | CHIP5072 | STY specific |         | STY1890 | ATGAAAA TTATTTAC ATGAAAA  | 0 |
| 3867 | CHIP5085 | STY specific |         | STY2024 | ATGGAGC TTAAGAG(ATGGAGC   | 0 |
| 3868 | CHIP5194 | STY specific |         | STY3090 | ATGAACC TTATTGG ATGAACC   | 0 |
| 3869 | CHIP5124 | STY specific |         | STY2065 | ATGAACA TTAATCA/ATGAACA   | 0 |
| 3870 | CHIP5140 | STM/STY      |         | STY2209 | ATGAAAT, TTAATCT(GTGAAT   | 0 |
| 3871 | CHIP5074 | STY specific |         | STY2003 | ATGAATC, TTAATGC TTGAATC, | 0 |
| 3872 | CHIP5003 | STM/STY      |         |         | ATGTTTCG TTATTGA ATGTTTCG | 0 |
| 3873 | CHIP5110 | STY specific |         | STY2051 | ATGGTGG TTACAAA ATGGTGG   | 0 |
| 3874 | CHIP5216 | STM/STY      |         | STY3533 | ATGACTA TTAAGCG ATGACTA,  | 0 |
| 3875 | CHIP5232 | STM/STY      |         | STY3668 | ATGAGCC TTAATAC/ATGAGCC   | 0 |
| 3876 | CHIP5246 | STY specific |         | STY3684 | ATGAACC TTAGTGC ATGAACC   | 0 |
| 3877 | CHIP5389 | STY specific |         | STY4663 | ATGACCG TTAGCGG ATGACCG   | 0 |
| 3878 | CHIP5404 | STY specific |         | STY4680 | ATGTTGA TTAGGCA ATGTTGA   | 0 |
| 3879 | CHIP5420 | STY specific |         | STY4832 | ATGAAAA TTATGTT(ATGAAAA   | 0 |
| 3880 | CHIP5435 | STM/STY      |         | STY4881 | ATGAGTG TTAGGCT ATGAGTG   | 0 |
| 3881 | CHIP5374 | STY specific |         | STY4632 | ATGAAAT(TTACTTT1ATGAAAT(  | 0 |
| 3882 | CHIP5390 | STY specific |         | STY4664 | ATGCCCC TTAACTT1ATGCCCC   | 0 |
| 3883 | buffer   | none         |         |         | buffer                    | 0 |
| 3884 | empty    | none         |         |         | empty                     | 0 |
| 3885 | empty    | none         |         |         | empty                     | 0 |
| 3886 | empty    | none         |         |         | empty                     | 0 |
| 3887 | empty    | none         |         |         | empty                     | 0 |
| 3888 | empty    | none         |         |         | empty                     | 0 |
| 3889 | CHIP2745 | STM specil   | STM1531 |         | ATGCATG TTATTTCG,ATGCATG  | 1 |

|      |          |              |         |          |                          |   |
|------|----------|--------------|---------|----------|--------------------------|---|
| 3890 | CHIP2570 | STM/STY      | STM3823 | STY3955  | ATGCGAA TTATTTTT ATGCGAA | 1 |
| 3891 | CHIP0803 | STM/STY      | STM0434 | STY0473  | ATGAAAA TTACCAT ATGAAAA  | 1 |
| 3892 | CHIP0819 | STM/STY      | STM2019 | STY2222  | ATGACGC TTATACC ATGACGC  | 1 |
| 3893 | CHIP2626 | STM/STY      | STM0039 | STY0047  | ATGAAAC TTATGCC GTGAAAC  | 1 |
| 3894 | CHIP2642 | STM/STY      | STM0075 | STY0085  | ATGAAGA TTAATG ATGAAGA   | 1 |
| 3895 | CHIP0837 | STM/STY      | STM4050 | STY3823  | ATGAGTA TTAAGT ATGAGTA   | 1 |
| 3896 | CHIP0853 | STM/STY      | STM3173 | STY3350  | ATGCTAT TTAACC ATGCTAT   | 1 |
| 3897 | CHIP3244 | STM/STY      | STM3327 | STY3506  | ATGAAAA TTATTCC ATGAAAA  | 1 |
| 3898 | CHIP3260 | STM/STY      | STM3366 | STY3546a | ATGAGTC TTAACG ATGAGTC   | 1 |
| 3899 | CHIP3276 | STM/STY      | STM3391 | STY3570  | ATGGCAA TTAATCA ATGGCAA  | 1 |
| 3900 | CHIP3292 | STM/STY      | STM0653 | STY0704  | ATGATGA TTACGGC GTGATGA  | 1 |
| 3901 | CHIP2678 | STM/STY      | STM0154 | STY0177  | ATGAGTA TTATTTT ATGAGTA  | 1 |
| 3902 | CHIP2694 | STM/STY      | STM0178 | STY0196  | ATGCTGG TTAACC ATGCTGG   | 1 |
| 3903 | CHIP2710 | STM/STY      | STM0210 | STY0232  | ATGGCTG TTAACGC ATGGCTG  | 1 |
| 3904 | CHIP2726 | STM/STY      | STM0241 | STY0266  | ATGGTGA TTAAGT ATGGTGA   | 1 |
| 3905 | CHIP2742 | STM specil   | STM1525 |          | ATGGCGC TTAGTAT GTGGCGC  | 1 |
| 3906 | CHIP0776 | STM specil   | STM3636 |          | ATGAAAA TTATTCC ATGAAAA  | 1 |
| 3907 | CHIP2448 | STM/STY      | STM3543 | STY4268  | ATGAAAA TTAATA ATGAAAA   | 1 |
| 3908 | CHIP3713 | STM specil   | STM4539 |          | ATGTCAC TTAGATT ATGTCAC  | 1 |
| 3909 | CHIP3737 | STM/STY      | STM4592 | STY4940  | ATGGCCC TTATTGC GTGGCCC  | 1 |
| 3910 | CHIP4049 | STM specil   | STM2742 |          | ATGGTAA TTAAGT ATGGTAA   | 1 |
| 3911 | CHIP3777 | STM specil   | STM0325 |          | ATGTTGG TTACCGA ATGTTGG  | 0 |
| 3912 | CHIP3793 | STM specil   | STM1052 |          | ATGGACA TTATTTT ATGGACA  | 1 |
| 3913 | CHIP4027 | STM/STY      | STM2708 | STY4613  | ATGGCAG TTATTTT ATGGCAG  | 1 |
| 3914 | CHIP4043 | STM specil   | STM2734 |          | ATGACTA TTAACGT ATGACTA  | 1 |
| 3915 | CHIP3771 | STM/STY      | STM0311 | STY0356  | ATGTGCG TTAATT ATGTGCG   | 1 |
| 3916 | CHIP4083 | STM/STY      | STM2783 | STY2901  | ATGCTAA TTAGGT ATGCTAA   | 1 |
| 3917 | CHIP3819 | STM/STY      | STM1101 | STY1134  | ATGAAGG TTATTTT ATGAAGG  | 1 |
| 3918 | CHIP3835 | STM/STY      | STM1135 | STY1172  | ATGGAGA TTAATAT ATGGAGA  | 1 |
| 3919 | CHIP3789 | STM specific |         |          | ATGATTA TTATGCT ATGATTA  | 0 |
| 3920 | CHIP3813 | STM/STY      | STM1092 | STY1124  | ATGCCAG TTACAGC ATGCCAG  | 1 |
| 3921 | CHIP3829 | STM/STY      | STM1126 | STY1162  | ATGGGAA TTAGCTG ATGGGAA  | 1 |
| 3922 | CHIP3845 | STM/STY      | STM1158 | STY1195  | ATGCAAT TTATTTT ATGCAAT  | 1 |
| 3923 | CHIP3861 | STM/STY      | STM1206 | STY1246  | ATGATCA TTACAAA ATGATCA  | 1 |
| 3924 | CHIP2437 | STM specil   | STM3529 |          | ATGGTTA TTAACCT ATGGTTA  | 1 |
| 3925 | CHIP2383 | STM/STY      | STM3401 | STY4396  | ATGATGG TTACGCT ATGATGG  | 1 |
| 3926 | CHIP3847 | STM/STY      | STM1164 | STY1202  | ATGAAAA TTAATTG ATGAAAA  | 1 |
| 3927 | CHIP2423 | STM/STY      | STM3506 | STY4290  | ATGAAAA TTAGTGA ATGAAAA  | 1 |
| 3928 | CHIP2439 | STM specil   | STM3530 |          | ATGTTGA TTATTTG TTGTTGA  | 1 |
| 3929 | CHIP2463 | STM/STY      | STM3579 | STY4232  | ATGACTC TTAAGT ATGACTC   | 1 |
| 3930 | CHIP4112 | STM/STY      | STM4073 | STY3797  | ATGAGCG TTATTTT ATGAGCG  | 1 |
| 3931 | CHIP3530 | STM specil   | STM1039 |          | ATGTTTT TTAGGAC ATGTTTT  | 1 |
| 3932 | CHIP3546 | STM specil   | STM4204 |          | ATGAACA TTAATA ATGAACA   | 1 |
| 3933 | CHIP3570 | STM/STY      | STM4246 | STY4442  | ATGGCAG TTAAGT ATGGCAG   | 1 |
| 3934 | CHIP3586 | STM/STY      | STM4283 | STY4482  | ATGAAAA TTATTGG ATGAAAA  | 1 |
| 3935 | CHIP4178 | STM/STY      | STM2929 | STY3054  | ATGCGAA TTATTTT ATGCGAA  | 1 |
| 3936 | CHIP3426 | STM/STY      | STM0871 | STY0904  | ATGAAAC TTATCGG TTGAAAC  | 1 |
| 3937 | CHIP3044 | STM/STY      | STM2379 | STY2610  | ATGCGCC TTAAGT TTGCGCC   | 1 |
| 3938 | CHIP3452 | STM specil   | STM0909 |          | ATGGACC TTATTCC ATGGACC  | 1 |
| 3939 | CHIP3468 | STM specil   | STM0925 |          | ATGATGA TTAAGT TTGATGA   | 0 |
| 3940 | CHIP3108 | STM/STY      | STM2532 | STY2778  | ATGAAAC TTAAGG ATGAAAC   | 1 |
| 3941 | CHIP3533 | STM/STY      | STM4184 | STY4402  | ATGAAAA TTAACC ATGAAAA   | 1 |

|      |          |            |         |         |                 |              |   |
|------|----------|------------|---------|---------|-----------------|--------------|---|
| 3942 | CHIP3549 | STM specil | STM4207 |         | ATGAAAG TTAGTGA | ATGAAAG      | 1 |
| 3943 | CHIP3583 | STM/STY    | STM4278 | STY4476 | ATGAGCG TTATGGC | ATGAGCG      | 1 |
| 3944 | CHIP3599 | STM/STY    | STM4315 | STY4515 | ATGCTAA TTAATTA | ATGCTAA      | 1 |
| 3945 | CHIP3615 | STM/STY    | STM4347 | STY4707 | ATGCGCC TTACAAA | GTGCGCC      | 1 |
| 3946 | CHIP3055 | STM/STY    | STM2401 | STY2639 | ATGTTTC TTAGATG | ATGTTTC      | 1 |
| 3947 | CHIP3071 | STM/STY    | STM2446 | STY2683 | ATGTCTC TTATAGC | ATGTCTC      | 1 |
| 3948 | CHIP3087 | STM/STY    | STM2488 | STY2726 | ATGGCTT TTA     | CTTG ATGGCTT | 1 |
| 3949 | CHIP0266 | STM/STY    | STM1295 | STY1819 | ATGCGAA TTACCGA | ATGCGAA      | 1 |
| 3950 | CHIP0282 | STM/STY    | STM0024 | STY0029 | ATGAAAA TTAGTCA | ATGAAAA      | 1 |
| 3951 | CHIP3626 | STM/STY    | STM4374 | STY4730 | ATGCATA TTACCAT | ATGCATA      | 1 |
| 3952 | CHIP3642 | STM/STY    | STM4411 | STY4770 | ATGCGAA TTAGGGC | ATGCGAA      | 1 |
| 3953 | CHIP2986 | STM/STY    | STM2273 | STY2500 | ATGAAAA TTATTTA | ATGAAAA      | 1 |
| 3954 | CHIP3010 | STM/STY    | STM2319 | STY2549 | ATGATCC TTATCCA | ATGATCC      | 1 |
| 3955 | CHIP3004 | STM/STY    | STM2311 | STY2542 | ATGTCAT TTAGCGC | ATGTCAT      | 1 |
| 3956 | CHIP3020 | STM/STY    | STM2339 | STY2569 | ATGTCTG TTAATGA | ATGTCTG      | 1 |
| 3957 | CHIP0197 | STM/STY    | STM2058 | STY2263 | ATGCGCC TTACTGC | ATGCGCC      | 1 |
| 3958 | CHIP0213 | STM/STY    | STM3242 | STY3424 | ATGAATG TTATGCA | ATGAATG      | 1 |
| 3959 | CHIP0229 | STM specil | STM0197 |         | ATGATGT TTACGAC | ATGATGT      | 1 |
| 3960 | CHIP2328 | STM/STY    | STM1149 | STY1186 | ATGAGCT TTACCCG | ATGAGCT      | 1 |
| 3961 | CHIP0231 | STM specil | STM0199 |         | ATGAAAA TTA     | CTGA ATGAAAA | 1 |
| 3962 | CHIP0247 | STM/STY    | STM0367 | STY0399 | ATGACGA TTAATTA | TATGACGA     | 1 |
| 3963 | CHIP2346 | STM/STY    | STM1284 | STY1832 | ATGACCT TTATGCA | ATGACCT      | 1 |
| 3964 | CHIP2362 | STM/STY    | STM1428 | STY1694 | ATGCAAC TTAGTGA | ATGCAAC      | 1 |
| 3965 | CHIP3631 | STM/STY    | STM4383 | STY4739 | ATGACTC TTAAGCA | GTGACTC      | 1 |
| 3966 | CHIP3647 | STM specil | STM4420 |         | ATGGCCA TTATCGC | ATGGCCA      | 1 |
| 3967 | CHIP1500 | STM/STY    | STM2356 | STY2586 | ATGAAAC TTATGCG | ATGAAAC      | 1 |
| 3968 | CHIP3921 | STM/STY    | STM1337 | STY1773 | ATGTCAC TTATTTA | ATGTCAC      | 1 |
| 3969 | CHIP3945 | STM/STY    | STM1372 | STY1751 | ATGGCTG TTATACC | ATGGCTG      | 1 |
| 3970 | CHIP0538 | STM/STY    | STM4560 | STY4910 | ATGACGT TTAGTGT | ATGACGT      | 1 |
| 3971 | CHIP3985 | STM/STY    | STM1494 | STY1570 | ATGCACA TTAGACG | ATGCACA      | 1 |
| 3972 | CHIP1317 | STM/STY    | STM3776 | STY4008 | ATGAATG TTA     | ACTC ATGAATG | 1 |
| 3973 | CHIP0572 | STM/STY    | STM4230 | STY4426 | ATGGCGA TTA     | AACA ATGGCGA | 1 |
| 3974 | CHIP1423 | STM/STY    | STM3882 | STY3896 | ATGCGAA TTACTCC | ATGCGAA      | 1 |
| 3975 | CHIP1359 | STM/STY    | STM0248 | STY0275 | ATGGCAA TTATTTT | GTGGCAA      | 1 |
| 3976 | CHIP1375 | STM/STY    | STM1991 | STY2199 | ATGGCGC TTACGCC | ATGGCGC      | 1 |
| 3977 | CHIP1487 | STM/STY    | STM4241 | STY4437 | ATGGAAA TTA     | ACGT ATGGAAA | 1 |
| 3978 | CHIP3908 | STM/STY    | STM1305 | STY1809 | ATGACGC TTATACC | ATGACGC      | 1 |
| 3979 | CHIP3910 | STM/STY    | STM1308 | STY1805 | ATGCGTA TTATTCT | ATGCGTA      | 1 |
| 3980 | CHIP3934 | STM specil | STM1356 |         | ATGGATT TTA     | CTTG ATGGATT | 1 |
| 3981 | CHIP3958 | STM/STY    | STM1442 | STY1680 | ATGTCTG TTACCGC | ATGTCTG      | 1 |
| 3982 | CHIP0551 | STM/STY    | STM1176 | STY1215 | ATGTCTA TTAGATT | ATGTCTA      | 1 |
| 3983 | CHIP3998 | STM/STY    | STM2095 | STY2305 | ATGAAAA TTATAAA | CATGAAAA     | 1 |
| 3984 | CHIP1338 | STM/STY    | STM0319 | STY0364 | ATGACGT TTATGCC | ATGACGT      | 1 |
| 3985 | CHIP2012 | STM/STY    | STM4513 | STY4869 | ATGACGA TTA     | AACA ATGACGA | 1 |
| 3986 | CHIP2028 | STM/STY    | STM4596 | STY4945 | ATGAAGC TTA     | AAAT ATGAAGC | 1 |
| 3987 | CHIP2052 | STM/STY    | STM3617 | STY4183 | ATGATGA TTA     | ACGT ATGATGA | 1 |
| 3988 | CHIP3216 | STM/STY    | STM3270 | STY3453 | ATGGACA TTACGCC | ATGGACA      | 1 |
| 3989 | CHIP1509 | STM/STY    | STM2306 | STY2536 | ATGCGTA TTATAAC | ATGCGTA      | 1 |
| 3990 | CHIP1525 | STM/STY    | STM2286 | STY2515 | ATGAGCC TTAGCCG | ATGAGCC      | 1 |
| 3991 | CHIP1551 | STM/STY    | STM2491 | STY2729 | ATGAATC TTACGCG | ATGAATC      | 1 |
| 3992 | CHIP1583 | STM/STY    | STM0505 | STY0551 | ATGCAAA TTAGCTT | ATGCAAA      | 1 |
| 3993 | CHIP3139 | STM specil | STM2595 |         | ATGATGC TTA     | ATGATGC      | 1 |

|      |          |            |         |         |                             |   |
|------|----------|------------|---------|---------|-----------------------------|---|
| 3994 | CHIP3155 | STM specil | STM2611 |         | ATGTTTG` TTATTTG(ATGTTTG`   | 1 |
| 3995 | CHIP2031 | STM/STY    | STM3746 | STY4047 | ATGTTTG, TTATCCG` ATGTTTG,  | 1 |
| 3996 | CHIP2047 | STM/STY    | STM3629 | STY4169 | ATGTTGC TTA`CTTC` ATGTTGC   | 1 |
| 3997 | CHIP2049 | STM/STY    | STM3626 | STY4172 | ATGAGTA TTA`ACTC/ ATGAGTA   | 1 |
| 3998 | CHIP2065 | STM/STY    | STM3545 | STY4266 | ATGACCT TTATTTAC` ATGACCT   | 1 |
| 3999 | CHIP0975 | STM specil | STM1042 |         | ATGATGA TTAAGAA/ ATGATGA    | 1 |
| 4000 | CHIP0999 | STM/STY    | STM1014 | STY1022 | ATGTCAA, TTACCCC ATGTCAA,   | 0 |
| 4001 | CHIP1023 | STM/STY    | STM4470 | STY4808 | ATGGCAA TTAGTGA/ ATGGCAA    | 1 |
| 4002 | CHIP1039 | STM/STY    | STM2945 | STY3073 | ATGCCAG TTATGTC/ ATGCCAG    | 1 |
| 4003 | CHIP0649 | STM/STY    | STM4460 | STY4800 | ATGGCTA TTACAGA/ ATGGCTA    | 1 |
| 4004 | CHIP1804 | STM/STY    | STM4101 | STY3768 | ATGAGTG TTACAGC` ATGAGTG    | 1 |
| 4005 | CHIP1836 | STM/STY    | STM0706 | STY0747 | ATGGCCC TTAAGGT, ATGGCCC    | 1 |
| 4006 | CHIP1876 | STM/STY    | STM0713 | STY0753 | ATGCTGA TTAATGT` ATGCTGA    | 1 |
| 4007 | CHIP0586 | STM/STY    | STM0544 | STY0590 | ATGTCGC TTATGGG ATGTCGC     | 1 |
| 4008 | CHIP0602 | STM/STY    | STM2565 | STY2812 | ATGATGG TTAACCA/ ATGATGG    | 1 |
| 4009 | CHIP1815 | STM/STY    | STM4049 | STY3824 | ATGGCAA TTAATCG/ GTGGCAA    | 1 |
| 4010 | CHIP1847 | STM/STY    | STM0645 | STY0696 | ATGGTCA TTACCGG ATGGTCA     | 0 |
| 4011 | CHIP1879 | STM/STY    | STM0268 | STY0289 | ATGGATC TTATACG/ ATGGATC    | 1 |
| 4012 | CHIP0589 | STM/STY    | STM2559 | STY2806 | ATGAACG TTATTTCC` ATGAACG   | 1 |
| 4013 | CHIP0613 | STM/STY    | STM3502 | STY4294 | ATGCAAG TTATGCT` ATGCAAG    | 1 |
| 4014 | CHIP0629 | STM/STY    | STM1695 | STY1356 | ATGCCGT TTA`CTCT( ATGCCGT   | 1 |
| 4015 | CHIP0680 | STM/STY    | STM0110 | STY0129 | ATGGCAG TTACCGC ATGGCAG     | 1 |
| 4016 | CHIP0608 | STM/STY    | STM1749 | STY1302 | ATGGCTG TTAAGCG ATGGCTG     | 1 |
| 4017 | CHIP0632 | STM/STY    | STM2892 | STY3015 | ATGGGCC TTAGGCG ATGGGCC     | 1 |
| 4018 | CHIP0752 | STM/STY    | STM2459 | STY2696 | ATGAACA TTAGGAA GTGAACA     | 1 |
| 4019 | CHIP1819 | STM/STY    | STM4029 | STY3849 | ATGAGTC TTA`CTCC` ATGAGTC   | 1 |
| 4020 | CHIP1851 | STM/STY    | STM0634 | STY0684 | ATGAGTG TTAGAAC/ GTGAGTG    | 1 |
| 4021 | CHIP0123 | STM/STY    | STM4165 | STY3720 | ATGCTAA, TTAAGCG ATGCTAA,   | 1 |
| 4022 | CHIP0139 | STM/STY    | STM4022 | STY3856 | ATGAACA TTAACGA/ ATGAACA,   | 1 |
| 4023 | CHIP4738 | STM/STY    | STM4002 | STY3879 | ATGAGTT TTAACGG GTGAGTT     | 1 |
| 4024 | CHIP0387 | STM/STY    | STM1518 | STY1542 | ATGAAAA` TTA`AAGG` ATGAAAA` | 1 |
| 4025 | CHIP0403 | STM/STY    | STM1191 | STY1230 | ATGGCCC TTA`CTTA( ATGGCCC   | 1 |
| 4026 | CHIP1254 | STM/STY    | STM1682 | STY1381 | ATGTCAC TTATGCC` ATGTCAC    | 1 |
| 4027 | CHIP0429 | STM/STY    | STM2501 | STY2742 | ATGGGTC TTAGTCT( ATGGGTC    | 1 |
| 4028 | CHIP1280 | STM/STY    | STM3362 | STY3543 | ATGAAAA TTA`CTTA1 ATGAAAA/  | 1 |
| 4029 | CHIP0469 | STM/STY    | STM3719 | STY4076 | ATGAAAA` TTA`CTTT1 ATGAAAA` | 1 |
| 4030 | CHIP4677 | STM/STY    | STM0305 | STY0342 | ATGATGC TTATCGG ATGATGC     | 1 |
| 4031 | CHIP0118 | STM/STY    | STM4160 | STY3725 | ATGTTAC( TTATGCT/ ATGTTAC(  | 1 |
| 4032 | CHIP4717 | STM/STY    | STM3774 | STY4010 | ATGAAAC TTACATC` ATGAAAC    | 1 |
| 4033 | CHIP4711 | STM/STY    | STM1948 | STY2156 | ATGCATC TTATTTAT ATGCATC    | 1 |
| 4034 | CHIP0152 | STM/STY    | STM3870 | STY3908 | ATGGAAA TTACGCG ATGGAAA     | 1 |
| 4035 | CHIP0176 | STM/STY    | STM2037 | STY2242 | ATGAATG TTACAGT` ATGAATG    | 1 |
| 4036 | CHIP1227 | STM/STY    | STM4294 | STY4493 | ATGTCTT( TTAATCC` ATGTCTT(  | 1 |
| 4037 | CHIP1243 | STM/STY    | STM1911 | STY2120 | ATGATGG TTAGAAA` ATGATGG    | 1 |
| 4038 | CHIP1267 | STM/STY    | STM1712 | STY1339 | ATGTCGT TTAGTTC/ ATGTCGT    | 1 |
| 4039 | CHIP0898 | STM/STY    | STM2670 | STY2857 | ATGCAAA TTATGCG ATGCAAA     | 1 |
| 4040 | CHIP1749 | STM/STY    | STM2960 | STY3098 | ATGAGTA TTAACGC` ATGAGTA    | 1 |
| 4041 | CHIP0938 | STM/STY    | STM0428 | STY0467 | ATGCTGA TTATACC` ATGCTGA    | 1 |
| 4042 | CHIP0011 | STM/STY    | STM3977 | STY3582 | ATGCAAT TTAATC1 ATGCAAT1    | 1 |
| 4043 | CHIP0035 | STM/STY    | STM3952 | STY3607 | ATGCTGA TTACAGC ATGCTGA     | 1 |
| 4044 | CHIP0059 | STM/STY    | STM3923 |         | ATGAAAG TTAATAC1 ATGAAAG    | 1 |
| 4045 | CHIP1136 | STM/STY    | STM1885 | STY2093 | ATGTTGT TTA`AAAA( TTGTTAC(  | 1 |

|      |          |            |         |         |                          |   |
|------|----------|------------|---------|---------|--------------------------|---|
| 4046 | CHIP0069 | STM/STY    | STM3912 | STY3642 | ATGCGTT TTACGAT ATGCGTT  | 1 |
| 4047 | CHIP2658 | STM/STY    | STM0107 | STY0124 | ATGCAAC TTAAATC/CAACGCC  | 1 |
| 4048 | CHIP1704 | STM/STY    | STM1748 | STY1303 | ATGATTC TTAGTTG GTGATTC  | 1 |
| 4049 | CHIP1720 | STM/STY    | STM1788 | STY1915 | ATGACTG TTATGAG ATGACTG  | 1 |
| 4050 | CHIP1736 | STM/STY    | STM3001 | STY3142 | ATGAAAC TTAGATA ATGAAAC  | 1 |
| 4051 | CHIP0927 | STM/STY    | STM1743 | STY1308 | ATGAGCT TTATAGC ATGAGCT  | 1 |
| 4052 | CHIP1786 | STM/STY    | STM4042 | STY3833 | ATGAAAC TTATTTTT ATGAAAC | 1 |
| 4053 | CHIP0032 | STM/STY    | STM3955 | STY3604 | ATGGACG TTATTTTT ATGGACG | 1 |
| 4054 | CHIP0072 | STM/STY    | STM3907 | STY3650 | ATGATTG TTACGGC GTGATTG  | 1 |
| 4055 | CHIP3145 | STM specil | STM2601 |         | ATGCCGA TTAGAGC CCGAAAA  | 1 |
| 4056 | CHIP1715 | STM/STY    | STM1804 | STY1933 | ATGGCAA TTACAGC ATGGCAA  | 1 |
| 4057 | CHIP2865 | STM/STY    | STM1756 | STY1294 | ATGCAAT TTAAAGA ATGCAAT  | 1 |
| 4058 | CHIP2785 | STM/STY    | STM1597 | STY1467 | ATGACGA TTAATGC ATGACGA  | 1 |
| 4059 | CHIP2905 | STM/STY    | STM1845 | STY1976 | ATGAACA TTACTTA ATGAACA  | 1 |
| 4060 | CHIP2929 | STM/STY    | STM1890 | STY2098 | ATGCTGG TTAATCG ATGCTGG  | 1 |
| 4061 | CHIP4402 | STM/STY    | STM0504 | STY0550 | ATGTCCG TTAATAC ATGTCCG  | 1 |
| 4062 | CHIP4418 | STM/STY    | STM0527 | STY0575 | ATGATAA TTATTTTT ATGATAA | 1 |
| 4063 | CHIP4420 | STM/STY    | STM0531 | STY0579 | ATGAAAC TTATCCT ATGAAAC  | 1 |
| 4064 | CHIP4444 | STM/STY    | STM0579 | STY0621 | ATGGACG TTAGCGC ATGGACG  | 1 |
| 4065 | CHIP4468 | STM/STY    | STM0616 | STY0664 | ATGTCCA TTAACGC ATGTCCA  | 1 |
| 4066 | CHIP2756 | STM/STY    | STM1549 |         | ATGACGC TTAGGGG ATGACGC  | 1 |
| 4067 | CHIP2876 | STM/STY    | STM1785 | STY1911 | ATGAAAA TTACCAG ATGAAAA  | 1 |
| 4068 | CHIP2796 | STM/STY    | STM1617 | STY1447 | ATGATCC TTATAGC ATGATCC  | 1 |
| 4069 | CHIP2798 | STM/STY    | STM1620 | STY1444 | ATGAAAA TTA CTGG ATGAAAA | 1 |
| 4070 | CHIP2822 | STM/STY    | STM1653 | STY1415 | ATGCCAG TTAGTGA ATGCCAG  | 0 |
| 4071 | CHIP2838 | STM/STY    | STM1681 | STY1382 | ATGAGAT TTAAAGA ATGAGAT  | 1 |
| 4072 | CHIP4399 | STM/STY    | STM0498 | STY0544 | ATGTCTC TTAGCGT ATGTCTC  | 1 |
| 4073 | CHIP1155 | STM/STY    | STM1522 | STY1538 | ATGACAA TTAATGC ATGACAA  | 1 |
| 4074 | CHIP1171 | STM/STY    | STM1560 | STY1503 | ATGAGTT TTATGAT ATGAGTT  | 1 |
| 4075 | CHIP4249 | STM specil | STM3083 |         | ATGGACA TTAACCC ATGGACA  | 1 |
| 4076 | CHIP4361 | STM/STY    | STM0435 | STY0474 | ATGAAGG TTAATCG ATGAAGG  | 1 |
| 4077 | CHIP2465 | STM/STY    | STM3582 | STY4229 | ATGGCAA TTATCCC ATGGCAA  | 1 |
| 4078 | CHIP4601 | STM/STY    | STM4041 | STY3834 | ATGCAGC TTAATTA TTGCAGC  | 0 |
| 4079 | CHIP2505 | STM/STY    | STM3673 | STY4123 | ATGAAAT TTATTGC ATGAAAT  | 1 |
| 4080 | CHIP2529 | STM/STY    | STM3732 | STY4062 | ATGGCAG TTA CTGT ATGGCAG | 1 |
| 4081 | CHIP2531 | STM/STY    | STM3739 | STY4054 | ATGAGAT TTAAGAC ATGAGAT  | 1 |
| 4082 | CHIP4204 | STM/STY    | STM2977 | STY3117 | ATGAAAC TTATACT ATGAAAC  | 1 |
| 4083 | CHIP4316 | STM/STY    | STM2695 |         | ATGAACT TTATTCA GTGAACT  | 1 |
| 4084 | CHIP4348 | STM/STY    | STM0396 | STY0430 | ATGACGT TTATGCC ATGACGT  | 1 |
| 4085 | CHIP4276 | STM/STY    | STM3138 | STY3309 | ATGTTTA TTACAGT ATGTTTA  | 1 |
| 4086 | CHIP2476 | STM/STY    | STM3601 | STY4202 | ATGATGG TTAATAT ATGATGG  | 1 |
| 4087 | CHIP2518 | STM/STY    | STM3696 | STY4100 | ATGAAGA TTATGCG GTGAAGA  | 1 |
| 4088 | CHIP2550 | STM/STY    | STM3784 | STY3998 | ATGCAGG TTATACT ATGCAGG  | 1 |
| 4089 | CHIP4311 | STM/STY    | STM2689 | STY2875 | ATGGTCA TTAACCG GTGGTCA  | 1 |
| 4090 | CHIP4335 | STM/STY    | STM0052 | STY0061 | ATGGTGA TTATACT ATGGTGA  | 0 |
| 4091 | CHIP4359 | STM/STY    | STM0423 | STY0462 | ATGGACT TTATTTA ATGGACT  | 1 |
| 4092 | CHIP4287 | STM/STY    | STM3165 | STY3338 | ATGGCTA TTAACCG ATGGCTA  | 1 |
| 4093 | CHIP4545 | STM specil | STM2236 |         | ATGAGTG TTACACA ATGAGTG  | 1 |
| 4094 | CHIP4561 | STM/STY    | STM2157 | STY2387 | ATGCTGA TTA CTTC ATGCTGA | 1 |
| 4095 | CHIP1893 | STM/STY    | STM0938 | STY0934 | ATGTTTT TTAGGCC ATGTTTT  | 1 |
| 4096 | CHIP2101 | STM/STY    | STM3650 | STY4152 | ATGTCGA TTAACGT ATGTCGA  | 1 |
| 4097 | CHIP1933 | STM/STY    | STM4338 | STY4698 | ATGTCCT TTAATGC ATGTCCT  | 1 |

|      |          |            |         |         |                         |   |
|------|----------|------------|---------|---------|-------------------------|---|
| 4098 | CHIP1957 | STM/STY    | STM4439 | STY4778 | ATGCGTA TTAACGA ATGCGTA | 1 |
| 4099 | CHIP1919 | STM/STY    | STM3438 | STY4360 | ATGATTC TTAACGA ATGATTC | 1 |
| 4100 | CHIP1935 | STM/STY    | STM4357 | STY4714 | ATGATGA TTAATCG ATGATGA | 1 |
| 4101 | CHIP2143 | STM/STY    | STM3285 | STY3466 | ATGGCGA TTAGTCC ATGGCGA | 1 |
| 4102 | CHIP2159 | STM/STY    | STM3200 | STY3379 | ATGAAAG TTAATTC ATGAAAG | 1 |
| 4103 | CHIP2175 | STM/STY    | STM3128 | STY3297 | ATGAATA TTAATTC ATGAATA | 1 |
| 4104 | CHIP1616 | STM/STY    | STM2816 | STY2942 | ATGAAGG TTAGAAG ATGAAGG | 1 |
| 4105 | CHIP1977 | STM/STY    | STM4582 | STY4929 | ATGATGC TTAATAC ATGATGC | 1 |
| 4106 | CHIP4494 | STM/STY    | STM0376 | STY0408 | ATGTTTA TTAGCTA ATGTTTA | 1 |
| 4107 | CHIP1642 | STM/STY    | STM2212 | STY2448 | ATGGCAG TTACGCG ATGGCAG | 1 |
| 4108 | CHIP1658 | STM/STY    | STM2091 | STY2301 | ATGATTG TTAACGA ATGATTG | 1 |
| 4109 | CHIP1674 | STM/STY    | STM2150 | STY2379 | ATGCTAA TTACCGA ATGCTAA | 1 |
| 4110 | CHIP1690 | STM/STY    | STM1836 | STY1965 | ATGAAAA TTACGAA GTGAAAA | 1 |
| 4111 | CHIP2244 | STM/STY    |         |         | ATGTGCC TTAATGT ATGTGCC | 0 |
| 4112 | CHIP2260 | STM/STY    | STM3064 | STY3220 | ATGAAAC TTAATCC ATGAAAC | 1 |
| 4113 | CHIP3344 | STM/STY    | STM0750 | STY0796 | ATGAGCA TTACATC ATGAGCA | 1 |
| 4114 | CHIP3392 | STM/STY    | STM0820 | STY0855 | ATGTCTT TTAATCG ATGTCTT | 1 |
| 4115 | CHIP2189 | STM/STY    | STM3043 | STY3199 | ATGAAAA TTATTTA ATGAAAA | 1 |
| 4116 | CHIP0322 | STM/STY    | STM1179 | STY1218 | ATGATCA TTAGAGT ATGATCA | 1 |
| 4117 | CHIP3371 | STM/STY    | STM0792 | STY0825 | ATGAAAC TTAATCG ATGAAAC | 1 |
| 4118 | CHIP3419 | STM specil | STM0860 |         | ATGTATT TTACAGC ATGTATT | 1 |
| 4119 | CHIP2200 | STM/STY    | STM3317 | STY3496 | ATGAGTA TTAAGGC ATGAGTA | 1 |
| 4120 | CHIP0333 | STM/STY    | STM3764 | STY4022 | ATGGAGC TTATTGA ATGGAGC | 1 |
| 4121 | CHIP2248 | STM/STY    | STM3101 | STY3254 | ATGAATA TTATAAC ATGAATA | 1 |
| 4122 | CHIP0381 | STM/STY    | STM1947 | STY2155 | ATGATCA TTACTGG TTGATCA | 1 |
| 4123 | CHIP2195 | STM/STY    | STM3330 | STY3510 | ATGTTGT TTAATCG ATGTTGT | 1 |
| 4124 | CHIP2211 | STM/STY    | STM3254 | STY3436 | ATGTTTG TTACAGC ATGTTTG | 1 |
| 4125 | CHIP2227 | STM/STY    | STM3211 | STY3390 | ATGCCGC TTAATCG ATGCCGC | 1 |
| 4126 | CHIP0360 | STM/STY    | STM1399 | STY1721 | ATGAAAA TTAGCTC ATGAAAA | 1 |
| 4127 | CHIP0384 | STM specil | STM2232 |         | ATGATCT TTATTTT ATGATCT | 1 |
| 4128 | CHIP3351 | STM specil | STM0763 |         | ATGTTAG TTATTTA TTGTTAG | 1 |
| 4129 | CHIP0484 | STM/STY    | STM0740 | STY0786 | ATGTTAG TTAGCGT ATGTTAG | 1 |
| 4130 | CHIP0534 | STM/STY    | STM2873 | STY2994 | ATGGCAA TTAACGG ATGGCAA | 1 |
| 4131 | CHIP0527 | STM/STY    | STM2799 | STY2920 | ATGAATT TTAGATT ATGAATT | 1 |
| 4132 | CHIP0496 | STM/STY    | STM3727 | STY4067 | ATGGCTA TTATTTG ATGGCTA | 1 |
| 4133 | CHIP0699 | STM/STY    | STM2676 | STY2863 | ATGGTAA TTAAGCT ATGGTAA | 1 |
| 4134 | CHIP4427 | STM/STY    | STM0541 | STY0587 | ATGGCGA TTAGGCC ATGGCGA | 1 |
| 4135 | CHIP1021 | STM/STY    | STM1706 | STY1345 | ATGAGCG TTAGCCG ATGAGCG | 1 |
| 4136 | CHIP1038 | STM/STY    | STM1699 |         | ATGTCCA TTACGCT ATGTCCA | 1 |
| 4137 | CHIP1032 | STM/STY    | STM1966 | STY2174 | ATGAAAA TTATTTT ATGAAAA | 1 |
| 4138 | CHIP4511 | STM/STY    | STM1592 | STY1473 | ATGTCGC TTACAGG ATGTCGC | 1 |
| 4139 | CHIP0042 | STM/STY    | STM3944 | STY3615 | ATGCCAA TTACCGT ATGCCAA | 1 |
| 4140 | CHIP0070 | STM/STY    | STM3910 | STY3647 | ATGGCAA TTATTTA ATGGCAA | 1 |
| 4141 | CHIP1161 | STM/STY    | STM0982 | STY0982 | ATGACCA TTAACCG ATGACCA | 1 |
| 4142 | CHIP4182 | STM specil | STM2937 |         | ATGATGA TTATTGA TTGATGA | 1 |
| 4143 | CHIP2094 | STM/STY    | STM3675 | STY4121 | ATGCATT TTATTTT CATTACT | 1 |
| 4144 | CHIP3936 | STM specil | STM1358 |         | ATGAAAA TTACGCC ATGAAAA | 1 |
| 4145 | CHIP3929 | STM specil | STM1351 |         | ATGAGTT TTAGCCG ATGAGTT | 1 |
| 4146 | CHIP4732 | STM/STY    | STM3945 |         | ATGCAAT TTATTTT ATGCAAT | 1 |
| 4147 | CHIP3609 | STM/STY    | STM4336 | STY4696 | ATGGTTA TTACTGC ATGGTTA | 1 |
| 4148 | CHIP4330 | STM/STY    | STM4599 | STY4948 | ATGACTA TTATGTT ATGACTA | 1 |
| 4149 | CHIP4332 | STM/STY    | STM0001 | STY0001 | ATGAACC TTAGCCC ATGAACC | 1 |



|      |          |              |         |         |                          |   |
|------|----------|--------------|---------|---------|--------------------------|---|
| 4150 | CHIP4327 | STM/STY      | STM4462 |         | ATGTCGT TTATTTG(ATGTCGT  | 1 |
| 4151 | CHIP4505 | STM/STY      | STM1722 |         | ATGGCAG TTAGGAA ATGGCAG  | 1 |
| 4152 | CHIP4499 | STM specil   | STM1281 |         | ATGTACG TTAGTCC(ATGTACG  | 1 |
| 4153 | CHIP3185 | STM/STY      | STM3197 | STY3376 | ATGCTGA TTAGTGT ATGCTGA  | 1 |
| 4154 | CHIP3229 | STM/STY      | STM3293 | STY3471 | ATGTACG TTAGCGCATGTACG   | 1 |
| 4155 | CHIP3427 | STM/STY      | STM0873 | STY0906 | ATGCGCA TTAATGG ATGCGCA  | 1 |
| 4156 | CHIP3492 | STM/STY      | STM0971 |         | ATGCGCG TTACAGA TTGCGCG  | 1 |
| 4157 | CHIP3438 | STM specil   | STM0894 |         | ATGCAAA TTAAAGA ATGCAAA  | 1 |
| 4158 | CHIP3329 | STM/STY      | STM0719 | STY0759 | ATGCAAC TTAAACG ATGCAAC  | 1 |
| 4159 | CHIP1062 | STM specil   | PSLT032 |         | ATGCATT TTAGCAC ATGCATT  | 1 |
| 4160 | CHIP1102 | STM specil   | PSLT093 |         | ATGTTTA TTATTTTC GTGTTTA | 1 |
| 4161 | CHIP1071 | STM specil   | PSLT056 |         | ATGTTCA TTATCCA(ATGTTCA  | 1 |
| 4162 | CHIP1111 | STM specil   | PSLT102 |         | ATGGGAA TTACCTG GTGGGAA  | 1 |
| 4163 | CHIP0171 | STM specil   | PSLT080 |         | ATGAGAA TTACGCT ATGAGAA  | 1 |
| 4164 | CHIP0428 | STM specil   | PSLT008 |         | ATGGAGC TTATACG ATGGAGC  | 1 |
| 4165 | CHIP4753 | STM/STY      |         |         | CGCAACT TGGGCAG CGCAACT  | 0 |
| 4166 | CHIP4757 | STM specil   | PSLT108 |         | CGGGATC ACGCTCT CGGGATC  | 1 |
| 4167 | CHIP4761 | STM/STY      | STM0032 | STY0039 | GGCCATT AAGATCG GGCCATT  | 1 |
| 4168 | CHIP4765 | STM/STY      |         |         | CGTCAGC ACCTTAG CGTCAGC  | 0 |
| 4169 | CHIP4769 | STM/STY      |         |         | CGTTTTT AACTGCA CGTTTTT  | 0 |
| 4170 | CHIP4773 | STM/STY      |         |         | CTCTTCC TAGAGGC CTCTTCC  | 0 |
| 4171 | CHIP4849 | STM/STY      |         |         | GGGTGAT ATGCAGC GGGTGAT  | 0 |
| 4172 | CHIP4853 | STM/STY      |         |         | ACCATTT(CACAGGC ACCATTT  | 0 |
| 4173 | CHIP4857 | STM/STY      |         |         | AGATTGG CAGCGTC AGATTGG  | 0 |
| 4174 | CHIP4861 | STM/STY      |         |         | AATACCG GGTAGTT AATACCG  | 0 |
| 4175 | CHIP4865 | STM specific |         |         | GAACAAA CCAGATC GAACAAA  | 0 |
| 4176 | CTRL004  | none         |         |         | human plac               | 0 |
| 4177 | CHIP5198 | STY specific |         | STY3189 | ATGTTAT TTAGAGG ATGTTAT  | 0 |
| 4178 | CHIP5128 | STY specific |         | STY2069 | ATGAATA TTACCGG ATGAATA  | 0 |
| 4179 | CHIP5144 | STY specific |         | STY2299 | ATGAAAA TTATTTT(ATGAAAA  | 0 |
| 4180 | CHIP5248 | STY specific |         | STY3686 | ATGGCTG TTACCCC GTGGCTG  | 0 |
| 4181 | CHIP5182 | STY specific |         | STY3064 | ATGAGTA TTATTGA ATGAGTA  | 0 |
| 4182 | CHIP4919 | STY specific |         | STY0207 | ATGAAAA TTAAGG ATGAAAA   | 0 |
| 4183 | CHIP5212 | STY specific |         | STY3345 | ATGCAGG TTAATTC(ATGCAGG  | 0 |
| 4184 | CHIP5228 | STY specific |         | STY3664 | ATGGCAA TTAATTC(ATGGCAA  | 0 |
| 4185 | CHIP5242 | STM/STY      |         | STY3680 | ATGAAAG TTAGTCC ATGAAAG  | 0 |
| 4186 | CHIP5176 | STY specific |         | STY2887 | ATGGCTT TTAGAGG ATGGCTT  | 0 |
| 4187 | CHIP4913 | STY specific |         | STY0201 | ATGCTTT TTACGGA ATGCTTT  | 0 |
| 4188 | CHIP4929 | STY specific |         | STY0314 | ATGCCCC TTATTCA ATGCCCC  | 0 |
| 4189 | CHIP5230 | STY specific |         | STY3666 | ATGGCTG TTATACA(ATGGCTG  | 0 |
| 4190 | CHIP5244 | STY specific |         | STY3682 | ATGCTGG TTAGTTT(GTGCTGG  | 0 |
| 4191 | CHIP5259 | STM/STY      |         | STY3706 | ATGGGGC TTAATTC(ATGGGGC  | 0 |
| 4192 | CHIP5274 | STY specific |         | STY4075 | ATGGGTA TTAAAGG TTGGGTA  | 0 |
| 4193 | CHIP5018 | STY specific |         | STY1593 | ATGACGA TTAGTCA ATGACGA  | 0 |
| 4194 | CHIP5034 | STY specific |         | STY1610 | ATGACAT TTAACCA(ATGACAT  | 0 |
| 4195 | CHIP5166 | STY specific |         | STY2750 | ATGCATT TTAATAC ATGCATT  | 0 |
| 4196 | CHIP5180 | STM/STY      |         | STY2906 | ATGAAAA TTATTTT(ATGAAAA  | 0 |
| 4197 | CHIP5277 | STM/STY      |         |         | ATGGCAA TTAACCT(ATGGCAA  | 0 |
| 4198 | CHIP5378 | STM/STY      |         |         | ATGGCTG TTATACA(ATGGCTG  | 0 |
| 4199 | CHIP5394 | STY specific |         | STY4668 | ATGATCT TTAGGCA ATGATCT  | 0 |
| 4200 | CHIP5409 | STY specific |         | STY4821 | ATGAAGC TTATTTT ATGAAGC  | 0 |
| 4201 | CHIP5316 | STY specific |         | STY4549 | ATGACAG TTATCTC ATGACAG  | 0 |

|      |          |              |         |         |                          |   |
|------|----------|--------------|---------|---------|--------------------------|---|
| 4202 | CHIP5330 | STY specific |         | STY4569 | ATGGCGA TTAATTT(ATGGCGA  | 0 |
| 4203 | CHIP5428 | STY specific |         | STY4850 | ATGACTA TTAGCCT ATGACTA  | 0 |
| 4204 | CHIP5368 | STY specific |         | STY4619 | ATGAAAA TTAGGCC ATGAAAA  | 0 |
| 4205 | CHIP5380 | STY specific |         | STY4648 | ATGCTCA TTAACGG TTGCTCA  | 0 |
| 4206 | CHIP5391 | STY specific |         | STY4665 | ATGTTCC TTAATTG ATGTTCC  | 0 |
| 4207 | buffer   | none         |         |         | buffer                   | 0 |
| 4208 | empty    | none         |         |         | empty                    | 0 |
| 4209 | empty    | none         |         |         | empty                    | 0 |
| 4210 | empty    | none         |         |         | empty                    | 0 |
| 4211 | empty    | none         |         |         | empty                    | 0 |
| 4212 | empty    | none         |         |         | empty                    | 0 |
| 4213 | CHIP3321 | STM/STY      | STM0703 | STY0744 | ATGAACG TTACATA ATGAACG  | 1 |
| 4214 | CHIP2578 | STM/STY      | STM3833 | STY3945 | ATGATGA TTATTTT ATGATGA  | 1 |
| 4215 | CHIP2594 | STM/STY      | STM3856 | STY3927 | ATGGCTG TTAACGT ATGGCTG  | 1 |
| 4216 | CHIP2610 | STM/STY      | STM3888 | STY3888 | ATGCCTT TTAATTA ATGCCTT  | 1 |
| 4217 | CHIP0843 | STM/STY      | STM1778 | STY1904 | ATGACCC TTATTTT ATGACCC  | 1 |
| 4218 | CHIP0859 | STM/STY      | STM0111 | STY0130 | ATGGCCA TTATTTG ATGGCCA  | 1 |
| 4219 | CHIP2628 | STM/STY      | STM0042 | STY0050 | ATGAGTT TTATGAG ATGAGTT  | 1 |
| 4220 | CHIP2660 | STM/STY      | STM0119 | STY0139 | ATGTTCC TTATAGA ATGTTCC  | 1 |
| 4221 | CHIP2676 | STM/STY      | STM0150 | STY0173 | ATGATGG TTAGTGG ATGATGG  | 1 |
| 4222 | CHIP2692 | STM specil   | STM0176 |         | ATGAATT TTAAGGC ATGAATT  | 1 |
| 4223 | CHIP2708 | STM specil   | STM0201 |         | ATGAAAA TTAAGC ATGAAAA   | 1 |
| 4224 | CHIP2724 | STM/STY      | STM0238 | STY0263 | ATGGAAA TTATTCAT GTGGAAA | 1 |
| 4225 | CHIP3254 | STM/STY      | STM3346 | STY3526 | ATGCAAA TTACGGC ATGCAAA  | 1 |
| 4226 | CHIP3270 | STM/STY      | STM3381 | STY3561 | ATGGACG TTAAGCT ATGGACG  | 1 |
| 4227 | CHIP3286 | STM/STY      | STM0647 | STY0698 | ATGCGAT TTAGTTA GTGCGAT  | 1 |
| 4228 | CHIP3302 | STM/STY      | STM0671 | STY0717 | ATGACAA TTACAAC ATGACAA  | 1 |
| 4229 | CHIP3318 | STM/STY      | STM0700 | STY0738 | ATGAGTA TTAGCCG ATGAGTA  | 1 |
| 4230 | CHIP0784 | STM/STY      | STM1962 | STY2170 | ATGACCT TTATGAG ATGACCT  | 1 |
| 4231 | CHIP3896 | STM/STY      | STM1285 | STY1831 | ATGAATA TTACGAC ATGAATA  | 1 |
| 4232 | CHIP4009 | STM/STY      | STM2115 | STY2328 | ATGGCGC TTATCGC ATGGCGC  | 1 |
| 4233 | CHIP4033 | STM/STY      | STM2718 | STY4623 | ATGAAGT TTAGATA ATGAAGT  | 1 |
| 4234 | CHIP4057 | STM specil   | STM2750 |         | ATGTTTC TTATGGC ATGTTTC  | 1 |
| 4235 | CHIP4073 | STM specil   | STM2766 |         | ATGAGCC TTAGGTC ATGAGCC  | 1 |
| 4236 | CHIP4089 | STM/STY      | STM2792 | STY2912 | ATGAATA TTACGCT ATGAATA  | 1 |
| 4237 | CHIP3739 | STM/STY      | STM4597 | STY4946 | ATGAAAA TTAGCGG ATGAAAA  | 1 |
| 4238 | CHIP3755 | STM specil   | STM0284 |         | ATGGTCT TAAAAT ATGGTCT   | 1 |
| 4239 | CHIP4067 | STM specil   | STM2760 |         | ATGTCGC TTAATCA ATGTCGC  | 1 |
| 4240 | CHIP3795 | STM/STY      | STM1057 | STY1078 | ATGACAC TTAGGCT ATGACAC  | 1 |
| 4241 | CHIP2379 | STM/STY      | STM1495 | STY1569 | ATGACCA TTAACGG ATGACCA  | 1 |
| 4242 | CHIP2395 | STM/STY      | STM3452 | STY4346 | ATGTCCA TTATTTAT ATGTCCA | 1 |
| 4243 | CHIP3797 | STM/STY      | STM1060 | STY1081 | ATGGCGA TTAATTTI GTGGCGA | 1 |
| 4244 | CHIP2373 | STM/STY      | STM1456 | STY1666 | ATGGTAT TTATCCT ATGGTAT  | 1 |
| 4245 | CHIP2389 | STM/STY      | STM3421 | STY4377 | ATGCGTT TTATTC ATGCGTT   | 1 |
| 4246 | CHIP2405 | STM/STY      | STM3467 | STY4329 | ATGTGGC TTAACCT ATGTGGC  | 1 |
| 4247 | CHIP2421 | STM/STY      | STM3500 | STY4296 | ATGCGCC TTACAGC ATGCGCC  | 1 |
| 4248 | CHIP3885 | STM/STY      | STM1265 | STY1856 | ATGACTG TTAAGCA ATGACTG  | 1 |
| 4249 | CHIP3831 | STM/STY      | STM1128 | STY1164 | ATGATTA TTATAAT ATGATTA  | 1 |
| 4250 | CHIP3855 | STM/STY      | STM1199 | STY1238 | ATGAAAA TTAAGCA ATGAAAA  | 1 |
| 4251 | CHIP3871 | STM/STY      | STM1218 | STY1258 | ATGAATA TTAAGCA ATGAATA  | 1 |
| 4252 | CHIP2447 | STM/STY      | STM3542 | STY4269 | ATGAGCA TTACAGC TTGAGCA  | 1 |
| 4253 | CHIP3520 | STM specil   | STM1029 |         | ATGTTTG TTACCAT ATGTTTG  | 1 |

|      |          |              |         |         |                          |   |
|------|----------|--------------|---------|---------|--------------------------|---|
| 4254 | CHIP3544 | STM specil   | STM4202 |         | ATGGCGA TTATCCA ATGGCGA  | 1 |
| 4255 | CHIP4106 | STM/STY      | STM4057 | STY3814 | ATGACTG TTACCGG ATGACTG  | 1 |
| 4256 | CHIP4122 | STM/STY      | STM4090 | STY3780 | ATGACTG TTAAACG ATGACTG  | 1 |
| 4257 | CHIP4146 | STM/STY      | STM4129 | STY3745 | ATGACCC TTACCTT ATGACCC  | 1 |
| 4258 | CHIP4162 | STM/STY      | STM2907 | STY3030 | ATGGAAT TTAACCTT ATGGAAT | 1 |
| 4259 | CHIP3610 | STM/STY      | STM4337 | STY4697 | ATGTTGA TTAATCG ATGTTGA  | 1 |
| 4260 | CHIP3050 | STM/STY      | STM2391 | STY2623 | ATGGTCA TTAGAAC ATGGTCA  | 1 |
| 4261 | CHIP3436 | STM/STY      | STM0891 | STY0924 | ATGAGTA TTAGTGA ATGAGTA  | 1 |
| 4262 | CHIP3076 | STM/STY      | STM2472 | STY2709 | ATGGATG TTAAAGC ATGGATG  | 1 |
| 4263 | CHIP3092 | STM/STY      | STM2494 | STY2735 | ATGTTCA TTACATT ATGTTCA  | 1 |
| 4264 | CHIP3116 | STM/STY      | STM2551 | STY2797 | ATGTCAG TTAACCA ATGTCAG  | 1 |
| 4265 | CHIP4109 | STM/STY      | STM4065 | STY3805 | ATGAAAC TTATGCC ATGAAAC  | 1 |
| 4266 | CHIP4125 | STM/STY      | STM4098 | STY3771 | ATGTTAT TTATTTT ATGTTAT  | 1 |
| 4267 | CHIP4159 | STM specil   | STM2903 |         | ATGGAAG TTACCAA ATGGAAG  | 1 |
| 4268 | CHIP4175 | STM/STY      | STM2926 | STY3051 | ATGGTAA TTAGGCC ATGGTAA  | 1 |
| 4269 | CHIP4191 | STM/STY      | STM2953 | STY3082 | ATGACAA TTAACCT ATGACAA  | 1 |
| 4270 | CHIP3439 | STM specil   | STM0895 |         | ATGAACG TTAACCT ATGAACG  | 1 |
| 4271 | CHIP3455 | STM specific |         |         | ATGAAAA TTATGCG ATGAAAA  | 0 |
| 4272 | CHIP3471 | STM specil   | STM0928 |         | ATGACCA TTAATTG TTGACCA  | 1 |
| 4273 | CHIP2349 | STM/STY      | STM1310 | STY1803 | ATGACTC TTACCTT ATGACTC  | 1 |
| 4274 | CHIP2365 | STM/STY      | STM1437 | STY1685 | ATGAATA TTAACCT ATGAATA  | 1 |
| 4275 | CHIP2954 | STM/STY      | STM1984 | STY2192 | ATGGTGA TTAACCG GTGGTGA  | 1 |
| 4276 | CHIP3650 | STM specil   | STM4423 |         | ATGGCGT TTAATAT TTGGCGT  | 1 |
| 4277 | CHIP2994 | STM/STY      | STM2285 | STY2514 | ATGAAAT TTATTGC ATGAAAT  | 1 |
| 4278 | CHIP3690 | STM/STY      | STM4499 | STY4855 | ATGTTTC TTAGAGG ATGTTTC  | 1 |
| 4279 | CHIP3684 | STM specil   | STM4493 |         | ATGCGGA TTACAAT ATGCGGA  | 1 |
| 4280 | CHIP3700 | STM/STY      | STM4518 |         | ATGAAAA TTAGTGG ATGAAAA  | 1 |
| 4281 | CHIP2280 | STM/STY      | STM1136 | STY1173 | ATGTATC TTAAAGT ATGTATC  | 1 |
| 4282 | CHIP2296 | STM/STY      | STM1296 | STY1818 | ATGGATG TTAGAAA ATGGATG  | 1 |
| 4283 | CHIP2312 | STM/STY      | STM1446 | STY1676 | ATGAAAT TTAACCT ATGAAAT  | 1 |
| 4284 | CHIP0253 | STM/STY      | STM1470 | STY1652 | ATGTCCC TTAATCC ATGTCCC  | 1 |
| 4285 | CHIP2314 | STM/STY      | STM1476 | STY1646 | ATGGGAC TTAATGC ATGGGAC  | 1 |
| 4286 | CHIP2330 | STM/STY      | STM1154 | STY1191 | ATGTCAC TTATTCT ATGTCAC  | 1 |
| 4287 | CHIP0271 | STM/STY      | STM2864 | STY2986 | ATGTTCT TTAACCT ATGTTCT  | 1 |
| 4288 | CHIP2370 | STM/STY      | STM1453 | STY1669 | ATGAACA TTAATA ATGAACA   | 1 |
| 4289 | CHIP2959 | STM/STY      | STM1990 | STY2198 | ATGCGTT TTAACCT ATGCGTT  | 1 |
| 4290 | CHIP2975 | STM/STY      | STM2074 | STY2283 | ATGAGTC TTACAGC ATGAGTC  | 1 |
| 4291 | CHIP3905 | STM/STY      | STM1298 | STY1816 | ATGCGGT TTATTCC ATGCGGT  | 1 |
| 4292 | CHIP0498 | STM/STY      | STM1444 | STY1678 | ATGAAAT TTAATCG ATGAAAT  | 1 |
| 4293 | CHIP3953 | STM/STY      | STM1433 | STY1689 | ATGAGCA TTAACCT ATGAGCA  | 1 |
| 4294 | CHIP3969 | STM/STY      | STM1466 | STY1656 | ATGAAAA TTATTGT ATGAAAA  | 1 |
| 4295 | CHIP0562 | STM/STY      | STM1415 | STY1705 | ATGAAGA TTAACCT ATGAAGA  | 1 |
| 4296 | CHIP1413 | STM/STY      | STM3875 | STY3903 | ATGCAGC TTATTGT ATGCAGC  | 1 |
| 4297 | CHIP1319 | STM/STY      | STM3782 | STY4000 | ATGAATG TTAGGCA ATGAATG  | 1 |
| 4298 | CHIP1431 | STM/STY      | STM2578 | STY2824 | ATGGCTG TTAGCCG ATGGCTG  | 1 |
| 4299 | CHIP1455 | STM/STY      | STM0398 | STY0433 | ATGCTGG TTAATCG ATGCTGG  | 1 |
| 4300 | CHIP1471 | STM/STY      | STM4183 | STY4401 | ATGATGA TTAAGCC ATGATGA  | 1 |
| 4301 | CHIP1399 | STM/STY      | STM0069 | STY0079 | ATGAGCT TTAACCT ATGAGCT  | 1 |
| 4302 | CHIP3916 | STM/STY      | STM1322 | STY1789 | ATGATGT TTAACCG ATGATGT  | 1 |
| 4303 | CHIP3918 | STM/STY      | STM1330 | STY1781 | ATGAACA TTATCGA ATGAACA  | 1 |
| 4304 | CHIP0511 | STM/STY      | STM1981 | STY2189 | ATGATCC TTATGGG ATGATCC  | 1 |
| 4305 | CHIP3966 | STM/STY      | STM1462 | STY1660 | ATGAATG TTAGGCA ATGAATG  | 1 |

|      |          |            |         |         |                          |   |
|------|----------|------------|---------|---------|--------------------------|---|
| 4306 | CHIP3982 | STM/STY    | STM1489 | STY1575 | ATGCTGA TTACGCC ATGCTGA  | 1 |
| 4307 | CHIP0575 | STM/STY    | STM2371 | STY2602 | ATGCATC TTAAGAA/ATGCATC  | 1 |
| 4308 | CHIP1434 | STM/STY    | STM2573 | STY2819 | ATGAAAA TTATTGC/ATGAAAA  | 1 |
| 4309 | CHIP3160 | STM specil | STM2617 |         | ATGAACA TTAATTA/ATGAACA  | 1 |
| 4310 | CHIP3176 | STM/STY    | STM3180 | STY3358 | ATGCTTA/TTAAACG/ATGCTTA/ | 1 |
| 4311 | CHIP2060 | STM/STY    | STM3570 | STY4241 | ATGATTC/TTATTCA/ATGATTC/ | 1 |
| 4312 | CHIP2076 | STM/STY    | STM3482 | STY4314 | ATGGATA TTAGTCA/ATGGATA  | 1 |
| 4313 | CHIP0970 | STM/STY    | STM0346 | STY0380 | ATGAAAA TTAGAAG ATGAAAA/ | 1 |
| 4314 | CHIP0986 | STM/STY    | STM1382 | STY1739 | ATGTTTA/TTAATTA/ATGTTTA/ | 1 |
| 4315 | CHIP1559 | STM/STY    | STM0465 | STY0509 | ATGAAAC TTAATAC/ATGAAAC  | 1 |
| 4316 | CHIP1591 | STM/STY    | STM0559 | STY0607 | ATGTTGA TTATTTCC/ATGTTGA | 1 |
| 4317 | CHIP1999 | STM/STY    | STM4414 | STY4773 | ATGAGCT TTATTTCC/ATGAGCT | 1 |
| 4318 | CHIP2015 | STM/STY    | STM4532 | STY4890 | ATGGATA TTAGTGG ATGGATA  | 1 |
| 4319 | CHIP3179 | STM/STY    | STM3189 | STY3367 | ATGTCTT TTACCCC/ATGTCTT  | 1 |
| 4320 | CHIP3195 | STM/STY    | STM3219 | STY3397 | ATGAGCT TTAATCC/ATGAGCT  | 1 |
| 4321 | CHIP3197 | STM/STY    | STM3221 | STY3401 | ATGACCT TTATTGT/ATGACCT  | 1 |
| 4322 | CHIP2073 | STM/STY    | STM3491 | STY4305 | ATGGCGC TTAAGA/ATGGCGC   | 1 |
| 4323 | CHIP1522 | STM/STY    | STM2338 | STY2568 | ATGTCCC TTAGTGC GTGTCCC  | 1 |
| 4324 | CHIP1546 | STM/STY    | STM2553 | STY2800 | ATGATGC TTATGAT/ATGATGC  | 1 |
| 4325 | CHIP1570 | STM/STY    | STM0529 | STY0577 | ATGATCC TTATTGC/ATGATCC  | 1 |
| 4326 | CHIP1586 | STM/STY    | STM0528 | STY0576 | ATGAAAA TTATTGG/ATGAAAA  | 1 |
| 4327 | CHIP0745 | STM/STY    | STM2909 | STY3033 | ATGAATG TTACACC/ATGAATG  | 1 |
| 4328 | CHIP1812 | STM/STY    | STM4060 | STY3811 | ATGCGCA TTAGTGG ATGCGCA  | 1 |
| 4329 | CHIP1844 | STM/STY    | STM0663 | STY0708 | ATGTACG TTAACA/ATGTACG   | 1 |
| 4330 | CHIP1884 | STM/STY    | STM3406 | STY4391 | ATGTCAG TTAAGCC ATGTCAG  | 1 |
| 4331 | CHIP0682 | STM/STY    | STM2582 | STY2828 | ATGGCGA TTAGTGA/ATGGCGA  | 1 |
| 4332 | CHIP0698 | STM/STY    | STM2078 | STY2287 | ATGTTAA(TTATTGA/ATGTTAA/ | 1 |
| 4333 | CHIP1823 | STM/STY    | STM4009 | STY3871 | ATGATCG TTAGTCT GTGATCG  | 1 |
| 4334 | CHIP1855 | STM/STY    | STM0879 | STY0912 | ATGAGCA TTATCCG/ATGAGCA  | 1 |
| 4335 | CHIP1887 | STM/STY    | STM3410 | STY4387 | ATGAGTT TTAAGAA/ATGAGTT  | 1 |
| 4336 | CHIP0597 | STM specil | STM2772 |         | ATGGCTA TTAATTC/ATGGCTA  | 1 |
| 4337 | CHIP0709 | STM/STY    | STM1184 | STY1223 | ATGCGTA TTACCGG/ATGCGTA  | 1 |
| 4338 | CHIP0725 | STM/STY    | STM2580 | STY2826 | ATGAGCA TTACAGA/ATGAGCA  | 1 |
| 4339 | CHIP0592 | STM/STY    | STM3614 | STY4189 | ATGAAAA TTAGGAG ATGAAAA/ | 1 |
| 4340 | CHIP0704 | STM/STY    | STM2555 | STY2802 | ATGTTAA TTATGCG ATGTTAA/ | 1 |
| 4341 | CHIP0640 | STM/STY    | STM1124 | STY1159 | ATGGGAA TTAGCCA ATGGGAA  | 0 |
| 4342 | CHIP0664 | STM/STY    | STM1467 | STY1655 | ATGCAAA TTACAGC ATGCAAA  | 1 |
| 4343 | CHIP1827 | STM/STY    | STM0867 | STY0900 | ATGAGTA TTAGACG ATGAGTA  | 1 |
| 4344 | CHIP1859 | STM/STY    | STM0836 | STY0877 | ATGAGTC TTACGGC/ATGAGTC  | 1 |
| 4345 | CHIP4706 | STM/STY    | STM1858 | STY1993 | ATGAAGT TTAGCAA/ATGAAGT  | 1 |
| 4346 | CHIP4722 | STM/STY    | STM2173 | STY2403 | ATGAACG TTAACA/ATGAACG   | 1 |
| 4347 | CHIP3333 | STM/STY    | STM0725 | STY0767 | ATGTATT(TTAATGC/TATTGTC/ | 1 |
| 4348 | CHIP1222 | STM/STY    | STM4304 | STY4502 | ATGAAAC TTATAGG/ATGAAAC  | 1 |
| 4349 | CHIP1238 | STM/STY    | STM1938 | STY2146 | ATGAAAA TTAATGC/ATGAAAA  | 1 |
| 4350 | CHIP1262 | STM/STY    | STM1679 | STY1384 | ATGAGGC TTAGTGC ATGAGGC  | 1 |
| 4351 | CHIP1264 | STM/STY    | STM1688 | STY1373 | ATGGGTC TTACAGT ATGGGTC  | 1 |
| 4352 | CHIP0453 | STM/STY    | STM4262 | STY4460 | ATGGTGT TTACATT/ATGGTGT  | 1 |
| 4353 | CHIP1304 | STM/STY    | STM0048 | STY0057 | ATGTCTA TTATGCC/ATGTCTA/ | 1 |
| 4354 | CHIP4685 | STM/STY    | STM1025 | STY1039 | ATGAAAA TTAGAAA/ATGAAAA  | 1 |
| 4355 | CHIP4701 | STM/STY    | STM1649 | STY1420 | ATGTCCA TTAATA/ATGTCCA   | 1 |
| 4356 | CHIP0142 | STM/STY    | STM4019 | STY3859 | ATGAATT(TTAGATA/ATGAATT/ | 1 |
| 4357 | CHIP0136 | STM/STY    | STM3567 | STY4244 | ATGAAGG TTAGTAC/ATGAAGG  | 1 |

|      |          |            |         |          |                          |   |
|------|----------|------------|---------|----------|--------------------------|---|
| 4358 | CHIP4735 | STM/STY    | STM2728 | STY3669  | ATGCAGG TTAATTG/ATGCAGG  | 1 |
| 4359 | CHIP3760 | STM/STY    |         |          | ATGATGT TTAAGG/ATGATGT   | 0 |
| 4360 | CHIP0400 | STM/STY    | STM2436 | STY2674  | ATGATCG TTAGCGA ATGATCG  | 1 |
| 4361 | CHIP1251 | STM/STY    | STM1903 | STY2111  | ATGATCT TTAGAAA ATGATCT  | 1 |
| 4362 | CHIP0440 | STM/STY    | STM4260 | STY4457  | ATGAATA TTAAGGT ATGAATA  | 1 |
| 4363 | CHIP1733 | STM/STY    | STM3019 | STY3164  | ATGGCGC TTAGTCG ATGGCGC  | 1 |
| 4364 | CHIP0922 | STM/STY    | STM3209 | STY3388  | ATGCCGC TTAGTAC ATGCCGC  | 1 |
| 4365 | CHIP1773 | STM/STY    | STM2877 | STY3000  | ATGCATT TTATTTG ATGCATT  | 1 |
| 4366 | CHIP0019 | STM/STY    | STM3968 | STY3591  | ATGTCCA TTACAGC ATGTCCA  | 1 |
| 4367 | CHIP0920 | STM/STY    | STM3838 | STY3940  | ATGATGT TTAGATA TGTCACT  | 1 |
| 4368 | CHIP2181 | STM/STY    | STM3063 | STY3219  | ATGCGCA TTATTTAC CGCAGG  | 1 |
| 4369 | CHIP0053 | STM/STY    | STM3929 | STY3626  | ATGACCA TTAGAGA ATGACCA  | 1 |
| 4370 | CHIP2249 | STM/STY    | STM3100 | STY3253  | ATGTGAA TTAATC/TGAACGA   | 1 |
| 4371 | CHIP0093 | STM/STY    | STM4152 | STY3733  | ATGTCTA TTATTTA ATGTCTA  | 1 |
| 4372 | CHIP0877 | STM/STY    | STM0543 | STY0589  | ATGAGAC TTATTCC ATGAGAC  | 1 |
| 4373 | CHIP0893 | STM/STY    | STM1916 | STY2125  | ATGGCGC TTACATG ATGGCGC  | 1 |
| 4374 | CHIP0909 | STM/STY    | STM4004 | STY3877  | ATGTCTG TTAATG/ATGTCTG   | 1 |
| 4375 | CHIP1762 | STM/STY    | STM3014 | STY3158  | ATGGCTG TTATGCT ATGGCTG  | 1 |
| 4376 | CHIP1794 | STM/STY    | STM4011 | STY3869  | ATGAGCC TTAACG ATGAGCC   | 1 |
| 4377 | CHIP0040 | STM/STY    | STM3947 | STY3612  | ATGATGC TTATAAA ATGATGC  | 1 |
| 4378 | CHIP0080 | STM/STY    | STM3899 | STY3657  | ATGTCAC TTACGCC ATGTCAC  | 1 |
| 4379 | CHIP0872 | STM/STY    | STM1959 |          | ATGGCAC TTAACGC ATGGCAC  | 0 |
| 4380 | CHIP0888 | STM/STY    | STM2946 | STY3074  | ATGTCCC TTACCT ATGTCCC   | 1 |
| 4381 | CHIP2769 | STM/STY    | STM1567 | STY1493  | ATGAAAG TTAACGA ATGAAAG  | 1 |
| 4382 | CHIP2793 | STM/STY    | STM1610 | STY1454  | ATGACCA TTAAGG ATGACCA   | 1 |
| 4383 | CHIP2817 | STM/STY    | STM1646 | STY1423  | ATGAAGG TTATTTA ATGAAGG  | 1 |
| 4384 | CHIP2833 | STM/STY    | STM1671 | STY1393  | ATGATGA TTACAGT ATGATGA  | 1 |
| 4385 | CHIP1142 | STM/STY    | STM1542 | STY1520  | ATGAAAG TTAATGG ATGAAAG  | 1 |
| 4386 | CHIP1158 | STM/STY    | STM1510 | STY1551  | ATGACCG TTAATCT ATGACCG  | 1 |
| 4387 | CHIP1168 | STM/STY    | STM1000 | STY1004  | ATGAGCC TTAGAAG ATGAGCC  | 1 |
| 4388 | CHIP4452 | STM/STY    | STM0590 | STY0634  | ATGACCG TTATCGC ATGACCG  | 1 |
| 4389 | CHIP4476 | STM/STY    | STM0339 | STY0372  | ATGAAAA TTAATGG ATGAAAA  | 1 |
| 4390 | CHIP2860 | STM/STY    | STM1741 | STY1310  | ATGTCAC TTAATCC ATGTCAC  | 1 |
| 4391 | CHIP2780 | STM/STY    | STM1589 | STY1476  | ATGATGG TTACGCA TTGATGG  | 1 |
| 4392 | CHIP2900 | STM/STY    | STM1835 | STY1964  | ATGTCGT TTAACGG ATGTCGT  | 1 |
| 4393 | CHIP2806 | STM specil | STM1629 |          | ATGCCTA TTATCTG ATGCCTA  | 1 |
| 4394 | CHIP2926 | STM/STY    | STM1884 | STYkdgA  | ATGAAAA TTAATGC ATGAAAA  | 1 |
| 4395 | CHIP2942 | STM/STY    | STM1932 | STY2141  | ATGGCAG TTAGTGA ATGGCAG  | 1 |
| 4396 | CHIP4407 | STM/STY    | STM0515 | STYglxA2 | ATGAAAC TTACGCA ATGAAAC  | 1 |
| 4397 | CHIP4423 | STM/STY    | STM0537 | STY0585  | ATGTTAA TTAATTA ATGTTAA  | 1 |
| 4398 | CHIP4439 | STM specil | STM0572 |          | ATGTCTG TTAATAT ATGTCTG  | 1 |
| 4399 | CHIP4345 | STM/STY    | STM0393 | STY0426  | ATGCGTA TTACGCC GTGCGTA  | 1 |
| 4400 | CHIP4281 | STM/STY    | STM3150 | STY3321  | ATGACTG TTATTTCT ATGACTG | 1 |
| 4401 | CHIP4585 | STM/STY    | STM2831 | STY2952  | ATGTTCA TTAGCGC ATGTTCA  | 1 |
| 4402 | CHIP2489 | STM/STY    | STM3632 | STY4165  | ATGGCAC TTATTTCT ATGGCAC | 1 |
| 4403 | CHIP4625 | STM/STY    | STM4509 | STY4865  | ATGGACC TTATCGC ATGGACC  | 1 |
| 4404 | CHIP4649 | STM/STY    | STM2395 | STY2632  | ATGAAAA TTAGAAG ATGAAAA  | 1 |
| 4405 | CHIP2539 | STM/STY    | STM3765 | STY4021  | ATGGGTT TTAAGCG ATGGGTT  | 1 |
| 4406 | CHIP4212 | STM/STY    | STM2992 | STY3130  | ATGATAA TTATCCT ATGATAA  | 1 |
| 4407 | CHIP4228 | STM/STY    | STM3026 | STY3174  | ATGTCCA TTAGTTA ATGTCCA  | 1 |
| 4408 | CHIP4260 | STM/STY    | STM3105 | STY3258  | ATGGTTC TTATTTA ATGGTTC  | 1 |
| 4409 | CHIP4380 | STM/STY    | STM0464 | STY0508  | ATGAGTC TTAATTG ATGAGTC  | 1 |

|      |          |            |         |         |                           |   |
|------|----------|------------|---------|---------|---------------------------|---|
| 4410 | CHIP4596 | STM/STY    | STM2803 | STY2926 | ATGCCGC TTACTGT/ATGCCGC   | 1 |
| 4411 | CHIP2526 | STM/STY    | STM3725 | STY4069 | ATGCAA TTATTTCT/ATGCAA    | 1 |
| 4412 | CHIP4199 | STM/STY    | STM2972 | STY3111 | ATGCTCG TTACCGC ATGCTCG   | 1 |
| 4413 | CHIP4223 | STM/STY    | STM3018 | STY3163 | ATGGACG TTAGCGC GTGGACG   | 1 |
| 4414 | CHIP4247 | STM specil | STM3081 |         | ATGTCAA TTAGCCA ATGTCAA   | 1 |
| 4415 | CHIP4271 | STM/STY    | STM3125 | STY3294 | ATGTCCT TTATCTG/ATGTCCT   | 1 |
| 4416 | CHIP4583 | STM/STY    | STM2829 | STY2950 | ATGGCTA TTAATAA/ATGGCTA   | 1 |
| 4417 | CHIP1669 | STM/STY    | STM2117 | STY2330 | ATGTTTA TTATGGT ATGTTTA   | 1 |
| 4418 | CHIP1685 | STM/STY    | STM2243 |         | ATGATTT(TTACCAA)GTGATTT   | 1 |
| 4419 | CHIP2085 | STM/STY    | STM3712 | STY4083 | ATGCCGC TTAATGA/ATGCCGC   | 1 |
| 4420 | CHIP1917 | STM/STY    | STM3436 | STY4362 | ATGCCAC TTATTTCT/ATGCCAC  | 1 |
| 4421 | CHIP2133 | STM/STY    | STM3329 | STY3508 | ATGCAGT TTACGCT/ATGCAGT   | 1 |
| 4422 | CHIP2149 | STM/STY    | STM3251 | STY3433 | ATGAACA TTAATTTCT/ATGAACA | 1 |
| 4423 | CHIP2111 | STM/STY    | STM3592 | STY4211 | ATGAATA(TTACTGT)ATGAATA   | 1 |
| 4424 | CHIP2127 | STM/STY    | STM0951 | STY0949 | ATGAAAC TTAGATT ATGAAAC   | 1 |
| 4425 | CHIP1959 | STM/STY    | STM4444 | STY4783 | ATGGAAG TTAGCTA/ATGGAAG   | 1 |
| 4426 | CHIP1975 | STM/STY    | STM4570 | STY4921 | ATGGCAA TTAATCT/ATGGCAA   | 1 |
| 4427 | CHIP4484 | STM specil | STM0352 |         | ATGCGTA TTATTGG/ATGCGTA   | 1 |
| 4428 | CHIP4500 | STM/STY    | STM1300 | STY1814 | ATGCGCC TTATAGC/ATGCGCC   | 1 |
| 4429 | CHIP1985 | STM/STY    | STM4328 | STY4688 | ATGCCGC TTACGCC ATGCCGC   | 1 |
| 4430 | CHIP1618 | STM/STY    | STM2819 | STY2945 | ATGAGTG TTACCAC/ATGAGTG   | 1 |
| 4431 | CHIP4526 | STM/STY    | STM2196 | STY2430 | ATGGAGA TTACCTCT/ATGGAGA  | 1 |
| 4432 | CHIP4542 | STM specil | STM2233 |         | ATGAGCA TTATTTTA/ATGAGCA  | 1 |
| 4433 | CHIP4558 | STM/STY    | STM2151 | STY2380 | ATGAAAA TTATTTTA/ATGAAAA  | 1 |
| 4434 | CHIP4574 | STM/STY    | STM2179 | STY2409 | ATGACTC TTATTCG/ATGACTC   | 1 |
| 4435 | CHIP0361 | STM/STY    | STM1400 | STY1720 | ATGAATC TTAAGCG ATGAATC   | 1 |
| 4436 | CHIP2268 | STM/STY    | STM1069 | STY1090 | ATGAAAT TTACTTC/ATGAAAT   | 1 |
| 4437 | CHIP3352 | STM specil | STM0764 |         | ATGTATA TTATATT/ATGTATA   | 1 |
| 4438 | CHIP3400 | STM/STY    | STM0834 | STY0875 | ATGAATT(TTATTTTA)ATGAATT  | 1 |
| 4439 | CHIP0306 | STM/STY    | STM1302 | STY1812 | ATGAAAT TTAACA(ATGAAAT    | 1 |
| 4440 | CHIP2213 | STM/STY    | STM3250 | STY3432 | ATGGCCA TTAGGTC ATGGCCA   | 1 |
| 4441 | CHIP3387 | STM/STY    | STM0815 | STY0850 | ATGTTTC TTACATC/ATGTTTC   | 1 |
| 4442 | CHIP2184 | STM/STY    | STM3056 | STY3212 | ATGCAA TTAACGA/ATGCAA     | 1 |
| 4443 | CHIP0317 | STM/STY    | STM1958 | STYnml  | ATGAAAG TTATGTC/ATGAAAG   | 1 |
| 4444 | CHIP2224 | STM/STY    | STM3224 | STY3404 | ATGAATA TTATTGC/ATGAATA   | 1 |
| 4445 | CHIP2256 | STM/STY    | STM3075 | STY3233 | ATGCCAG TTATTCT/ATGCCAG   | 1 |
| 4446 | CHIP2272 | STM/STY    | STM1097 | STY1129 | ATGAAAC TTAGCTC/ATGAAAC   | 1 |
| 4447 | CHIP0312 | STM/STY    | STM2875 | STY2996 | ATGGAAA TTAATGG/ATGGAAA   | 1 |
| 4448 | CHIP0328 | STM/STY    | STM3758 | STY4029 | ATGTTAG TTAATGC/ATGTTAG   | 1 |
| 4449 | CHIP2235 | STM/STY    | STM3167 | STY3341 | ATGACCT TTATGCC/ATGACCT   | 1 |
| 4450 | CHIP0368 | STM/STY    | STM1406 | STY1714 | ATGGATA TTAGATT/ATGGATA   | 1 |
| 4451 | CHIP2275 | STM/STY    | STM1107 | STY1141 | ATGAGCG TTAAGGG/ATGAGCG   | 1 |
| 4452 | CHIP3359 | STM/STY    | STM0778 | STY0811 | ATGTCAT(TTAATTA)ATGTCAT   | 1 |
| 4453 | CHIP1552 | STM/STY    | STM2484 | STY2722 | ATGGACT TTAATTT/ATGGACT   | 1 |
| 4454 | CHIP1529 | STM/STY    | STM2539 | STY2785 | ATGGCCT TTAACCC/ATGGCCT   | 1 |
| 4455 | CHIP1554 | STM/STY    | STM2482 | STY2720 | ATGATTA(TTACACC)ATGATTA   | 1 |
| 4456 | CHIP1579 | STM/STY    | STM0480 | STY0524 | ATGTCGC TTAATCT/ATGTCGC   | 1 |
| 4457 | CHIP1696 | STM/STY    | STM1797 | STY1925 | ATGGGAA TTAGCCG/ATGGGAA   | 1 |
| 4458 | CHIP3536 | STM/STY    | STM4194 | STY4411 | ATGGCAC TTAACGT/ATGGCAC   | 1 |
| 4459 | CHIP2014 | STM/STY    | STM4531 | STY4889 | ATGTTTG TTAACAA(ATGTTTG   | 1 |
| 4460 | CHIP2067 | STM/STY    | STM3525 | STY4278 | ATGAAAG TTACGCG/ATGAAAG   | 1 |
| 4461 | CHIP2116 | STM/STY    | STM3565 | STY4247 | ATGAAGC TTAGCGC/ATGAAGC   | 1 |

|      |          |              |         |         |                                |   |
|------|----------|--------------|---------|---------|--------------------------------|---|
| 4462 | CHIP3598 | STM/STY      | STM4314 | STY4514 | ATGAGAT TTACGTA TTGAGAT        | 1 |
| 4463 | CHIP3559 | STM specil   | STM4218 |         | ATGCGAA TTACAGC ATGCGAA        | 1 |
| 4464 | CHIP4041 | STM/STY      | STM2731 | STY4638 | ATGGCTG TTATACA ATGGCTG        | 1 |
| 4465 | CHIP2498 | STM/STY      | STM3658 | STY4140 | ATGCAGC TTAGCTA ATGCAGC        | 1 |
| 4466 | CHIP3728 | STM specil   | STM4574 |         | ATGAAAA TTAGAGA ATGAAAA        | 1 |
| 4467 | CHIP3775 | STM/STY      | STM0318 | STY0363 | ATGACAC TTAACAC ATGACAC        | 1 |
| 4468 | CHIP1311 | STM/STY      | STM0004 | STY0004 | ATGAGAC TTATTATTAGACCAT        | 1 |
| 4469 | CHIP3979 | STM/STY      | STM1485 | STY1582 | ATGGGGT TTACGCA GTGGGGT        | 1 |
| 4470 | CHIP3956 | STM/STY      | STM1438 | STY1684 | ATGTTTCG TTA AAAAG ATGTTTCG    | 0 |
| 4471 | CHIP2621 | STM/STY      | STM0030 | STY0036 | ATGCGGC TTA AACCC ATGCGGC      | 1 |
| 4472 | CHIP2637 | STM/STY      | STM0064 | STY0073 | ATGCATG TTATAAT ATGCATG        | 1 |
| 4473 | CHIP2622 | STM/STY      | STM0031 | STY0038 | ATGACTA TTATCGT ATGACTA        | 1 |
| 4474 | CHIP2623 | STM/STY      | STM0034 | STY0041 | ATGAAAA TTA AAC ATGAAAA        | 1 |
| 4475 | CHIP4498 | STM/STY      | STM1159 | STY1197 | ATGCGTC TTAGAAG ATGCGTC        | 1 |
| 4476 | CHIP3096 | STM specil   | STM2508 |         | ATGGACC TTA ACTA GTGGACC       | 1 |
| 4477 | CHIP3217 | STM/STY      | STM3272 | STY3455 | ATGCTAA TTA AAAA ATGCTAA       | 1 |
| 4478 | CHIP3198 | STM/STY      | STM3232 | STY3412 | ATGAAAA TTACCAC ATGAAAA        | 1 |
| 4479 | CHIP3443 | STM specil   | STM0899 |         | ATGAACA TTA CTTA ATGAACA       | 1 |
| 4480 | CHIP3500 | STM/STY      | STM0987 | STY0989 | ATGGATC TTATGAT ATGGATC        | 1 |
| 4481 | CHIP3462 | STM specil   | STM0919 |         | ATGGAGA TTA AACG ATGGAGA       | 1 |
| 4482 | CHIP3346 | STM/STY      | STM0757 | STY0798 | ATGGATT TTA ACGG ATGGATT       | 1 |
| 4483 | CHIP1070 | STM specil   | PSLT053 |         | ATGATGT TTATTGA GTGATGT        | 1 |
| 4484 | CHIP1110 | STM specil   | PSLT101 |         | ATGAACG TTA CTGT GTGAACG       | 1 |
| 4485 | CHIP1079 | STM specil   | PSLT065 |         | ATGCGCA TTACGGC TGTCGCA        | 1 |
| 4486 | CHIP0169 | STM specil   | PSLT077 |         | ATGAGCG TTAGAGG ATGAGCG        | 1 |
| 4487 | CHIP0419 | STM specil   | PSLT017 |         | ATGTCAT TTATTCAC GTGTCAT       | 1 |
| 4488 | CHIP0421 | STM specil   | PSLT014 |         | ATGTTAA TTATTGC ATGTTAA        | 1 |
| 4489 | CHIP4754 | STM specil   | PSLT059 |         | GATGTCC CGGCCTC <b>GATGTCC</b> | 1 |
| 4490 | CHIP4758 | STM/STY      | STM1919 | STY2128 | TTTAACC CCTTCAC <b>TTTAACC</b> | 1 |
| 4491 | CHIP4762 | STM/STY      |         |         | TGCGCTC AAGTCAT <b>TGCGCTC</b> | 0 |
| 4492 | CHIP4766 | STM/STY      |         |         | AACCCAC CGTCAAT <b>AACCCAC</b> | 0 |
| 4493 | CHIP4770 | STM/STY      |         |         | ATTTTCG TTTCAA <b>ATTTTCG</b>  | 0 |
| 4494 | CHIP4774 | STM/STY      | STM0291 | STY0321 | TTATGGC CGGTGCA <b>TTATGGC</b> | 1 |
| 4495 | CHIP4850 | STM/STY      |         |         | CACAGCC GCCGGAC <b>CACAGCC</b> | 0 |
| 4496 | CHIP4854 | STM/STY      |         |         | AATGCAT TCTGTCG <b>AATGCAT</b> | 0 |
| 4497 | CHIP4858 | STM specific |         |         | GTTGAGC GCATTTG <b>GTTGAGC</b> | 0 |
| 4498 | CHIP4862 | STM specific |         |         | AGCCAGC AAATTAC <b>AGCCAGC</b> | 0 |
| 4499 | CHIP4866 | STM/STY      |         |         | GAAAAAG GGTTAAC <b>GAAAAAG</b> | 0 |
| 4500 | CTRL005  | none         |         |         | human plac                     | 0 |
| 4501 | CHIP5112 | STY specific |         | STY2053 | ATGGATA TTA ACAG GTGGATA       | 0 |
| 4502 | CHIP5218 | STM/STY      |         | STY3632 | ATGAAAG TTA ATAC ATGAAAG       | 0 |
| 4503 | CHIP5233 | STY specific |         | STY3670 | ATGAAAC TTAGTTG ATGAAAC        | 0 |
| 4504 | CHIP5255 | STY specific |         | STY2889 | ATGCTTA TTAGGGA ATGCTTA        | 0 |
| 4505 | CHIP5271 | STY specific |         | STY3950 | ATGAGGA TTA ATGA TTGAGGA       | 0 |
| 4506 | CHIP5014 | STM/STY      |         | STY1545 | ATGAAAC TTACGCG ATGAAAC        | 0 |
| 4507 | CHIP5130 | STY specific |         | STY2071 | ATGACTA TTA AAGT ATGACTA       | 0 |
| 4508 | CHIP5146 | STY specific |         | STY2349 | ATGATAA TTATTCAT GTGATAA       | 0 |
| 4509 | CHIP5162 | STM/STY      |         |         | ATGAAAA TTAGGCT ATGAAAA        | 0 |
| 4510 | CHIP5265 | STY specific |         | STY3918 | ATGAAAC TTATTTT ATGAAAC        | 0 |
| 4511 | CHIP5008 | STY specific |         | STY1361 | ATGGCTA TTAGCGC ATGGCTA        | 0 |
| 4512 | CHIP5024 | STY specific |         | STY1599 | ATGATTA TTAGTGC ATGATTA        | 0 |
| 4513 | CHIP5148 | STY specific |         | STY2351 | ATGAAGT TTA ATTA ATGAAGT       | 0 |

|      |          |              |         |         |                         |   |
|------|----------|--------------|---------|---------|-------------------------|---|
| 4514 | CHIP5164 | STY specific |         | STY2748 | ATGAAGA TTAGTTA/ATGAAGA | 0 |
| 4515 | CHIP5178 | STY specific |         |         | ATGATCA TTAGGGAATGATCA  | 0 |
| 4516 | CHIP4915 | STY specific |         | STY0203 | ATGATAA TTAGTGG ATGATAA | 0 |
| 4517 | CHIP4931 | STY specific |         | STY0323 | ATGACCG TTAGGTG ATGACCG | 0 |
| 4518 | CHIP4947 | STM/STY      |         | STY0479 | ATGATAA TTATTCA/ATGATAA | 0 |
| 4519 | CHIP5253 | STY specific |         | STY3692 | ATGAAAC TTACGCC ATGAAAC | 0 |
| 4520 | CHIP5269 | STY specific |         | STY3948 | ATGAAAA TTAAAAG/ATGAAAA | 0 |
| 4521 | CHIP5283 | STY specific |         | STY4208 | ATGTTCC TTAACGA/ATGTTCC | 0 |
| 4522 | CHIP5297 | STY specific |         | STY4521 | ATGCAAA TTATACC ATGCAAA | 0 |
| 4523 | CHIP5320 | STY specific |         | STY4554 | ATGAATG TTAGGAA ATGAATG | 0 |
| 4524 | CHIP5334 | STY specific |         | STY4573 | ATGAATC TTAGGCC ATGAATC | 0 |
| 4525 | CHIP5397 | STY specific |         | STY4672 | ATGGCTA TTATGCT/ATGGCTA | 0 |
| 4526 | CHIP5413 | STY specific |         | STY4825 | ATGACCA TTACCGT GTGACCA | 0 |
| 4527 | CHIP5354 | STY specific |         | STY4594 | ATGAGCA TTATGCA/ATGAGCA | 0 |
| 4528 | CHIP5287 | STY specific |         | STY4222 | ATGAAAA TTATTCA/ATGAAAA | 0 |
| 4529 | CHIP5302 | STY specific |         | STY4526 | ATGACTT TTAGGCT ATGACTT | 0 |
| 4530 | CHIP5317 | STY specific |         | STY4550 | ATGAAAA TTATAAT/ATGAAAA | 0 |
| 4531 | buffer   | none         |         |         | buffer                  | 0 |
| 4532 | empty    | none         |         |         | empty                   | 0 |
| 4533 | empty    | none         |         |         | empty                   | 0 |
| 4534 | empty    | none         |         |         | empty                   | 0 |
| 4535 | empty    | none         |         |         | empty                   | 0 |
| 4536 | empty    | none         |         |         | empty                   | 0 |
| 4537 | CHIP0771 | STM/STY      | STM2895 | STY3018 | ATGCAAC TTATCTC/ATGCAAC | 1 |
| 4538 | CHIP0795 | STM/STY      | STM0488 | STY0532 | ATGCGTA TTAACCG ATGCGTA | 1 |
| 4539 | CHIP0811 | STM/STY      | STM2027 | STY2232 | ATGTTGA TTACAGC ATGTTGA | 1 |
| 4540 | CHIP0827 | STM/STY      | STM3788 | STY3994 | ATGCTTT/TTACGCT ATGCTTT | 1 |
| 4541 | CHIP2634 | STM/STY      | STM0060 | STY0069 | ATGAGAC TTAATCA/ATGAGAC | 1 |
| 4542 | CHIP2650 | STM/STY      | STM0090 | STY0105 | ATGAATA TTAACTC ATGAATA | 1 |
| 4543 | CHIP0845 | STM/STY      | STM0231 | STY0254 | ATGTCTG TTAGTCA/ATGTCTG | 1 |
| 4544 | CHIP3236 | STM/STY      | STM3306 | STY3485 | ATGGAAA TTAGTCT/ATGGAAA | 1 |
| 4545 | CHIP3252 | STM/STY      | STM3344 | STY3524 | ATGGCTG TTAACGT ATGGCTG | 1 |
| 4546 | CHIP3268 | STM/STY      | STM3377 | STY3557 | ATGATGA TTAATAA/ATGATGA | 1 |
| 4547 | CHIP3284 | STM/STY      | STM0639 | STY0690 | ATGACGG TTATACG/ATGACGG | 1 |
| 4548 | CHIP3300 | STM/STY      | STM0662 | STY0707 | ATGATTA TTAGTGC ATGATTA | 1 |
| 4549 | CHIP2686 | STM/STY      | STM0169 | STY0191 | ATGGCAG TTATTTT/ATGGCAG | 1 |
| 4550 | CHIP2702 | STM/STY      | STM0188 | STY0213 | ATGTCTG TTATTCG/ATGTCTG | 1 |
| 4551 | CHIP2718 | STM/STY      | STM0224 | STY0247 | ATGGCGA TTACCAG ATGGCGA | 1 |
| 4552 | CHIP2734 | STM/STY      | STM1508 | STY1553 | ATGCAAA TTATTTT/ATGCAAA | 1 |
| 4553 | CHIP2750 | STM/STY      | STM1540 | STY1522 | ATGATGA TTATCCT ATGATGA | 1 |
| 4554 | CHIP2575 | STM specil   | STM3830 |         | ATGACTC TTATGTG/ATGACTC | 1 |
| 4555 | CHIP2456 | STM/STY      | STM3569 | STY4242 | ATGAATA TTAATCG/ATGAATA | 1 |
| 4556 | CHIP3721 | STM/STY      | STM4559 | STY4909 | ATGATGA TTAGTGT ATGATGA | 1 |
| 4557 | CHIP3745 | STM/STY      | STM0257 | STY0278 | ATGCCTC TTAGTCC/ATGCCTC | 1 |
| 4558 | CHIP3769 | STM/STY      | STM0309 | STY0354 | ATGATGA TTATGCG ATGATGA | 1 |
| 4559 | CHIP3785 | STM specil   | STM0332 |         | ATGGCTA TTATAAC/ATGGCTA | 1 |
| 4560 | CHIP3801 | STM/STY      | STM1068 | STY1089 | ATGACCA TTAGTTC/ATGACCA | 1 |
| 4561 | CHIP4035 | STM/STY      | STM2720 |         | ATGAAAA TTAGTCT/ATGAAAA | 1 |
| 4562 | CHIP3763 | STM specil   | STM0294 |         | ATGCTGC TTAGGCA ATGCTGC | 1 |
| 4563 | CHIP4075 | STM specil   | STM2768 |         | ATGACAA TTATTTT/ATGACAA | 1 |
| 4564 | CHIP3803 | STM/STY      | STM1073 | STY1095 | ATGTTAA TTACGGC ATGTTAA | 1 |
| 4565 | CHIP3827 | STM/STY      | STM1119 | STY1155 | ATGGCAA TTAGCCG ATGGCAA | 1 |



|      |          |            |         |         |                            |   |
|------|----------|------------|---------|---------|----------------------------|---|
| 4566 | CHIP3843 | STM/STY    | STM1156 | STY1193 | ATGCCAG T TACTCA (ATGCCAG  | 1 |
| 4567 | CHIP4093 | STM/STY    | STM3994 | STY3886 | ATGAATC T TATGGT (GTGAATC  | 1 |
| 4568 | CHIP3821 | STM/STY    | STM1104 | STY1138 | ATGCCGC T TATTTA (ATGCCGC  | 1 |
| 4569 | CHIP3837 | STM/STY    | STM1138 | STY1175 | ATGTGCG T TATTTT (GTGTGCC  | 1 |
| 4570 | CHIP3853 | STM/STY    | STM1196 | STY1235 | ATGAGCA T TACGCC (ATGAGCA  | 1 |
| 4571 | CHIP3869 | STM/STY    | STM1216 | STY1256 | ATGCCTG T TATGCA (ATGCCTG  | 1 |
| 4572 | CHIP2445 | STM/STY    | STM3538 | STY4272 | ATGTCCA T TATTCC (ATGTCCA  | 1 |
| 4573 | CHIP3839 | STM/STY    | STM1150 | STY1187 | ATGATGA T TATTCA (ATGATGA  | 1 |
| 4574 | CHIP2415 | STM/STY    | STM3495 | STY4301 | ATGAGCA T TAGATG (ATGAGCA  | 1 |
| 4575 | CHIP2431 | STM specil | STM3519 |         | ATGATGA T TATCCT (ATGATGA  | 1 |
| 4576 | CHIP3895 | STM/STY    | STM1283 | STY1834 | ATGAATT T TATGAT (ATGAATT  | 1 |
| 4577 | CHIP4096 | STM/STY    | STM4012 | STY3867 | ATGAATA T TATCTC (ATGAATA  | 1 |
| 4578 | CHIP4120 | STM/STY    | STM4087 | STY3783 | ATGAGTC T TACAGC (ATGAGTC  | 1 |
| 4579 | CHIP3538 | STM specil | STM4196 |         | ATGATTA T TAAACGC (ATGATTA | 1 |
| 4580 | CHIP3554 | STM specil | STM4212 |         | ATGGCTG T TAAACCG (ATGGCTG | 1 |
| 4581 | CHIP3578 | STM/STY    | STM4268 | STY4466 | ATGTCTA T TAGATA (ATGTCTA  | 1 |
| 4582 | CHIP3594 | STM/STY    | STM4305 | STY4503 | ATGACGC T TAAAGCG (GTGACGC | 1 |
| 4583 | CHIP4186 | STM specil | STM2941 |         | ATGACAA T TACGCG (ATGACAA  | 1 |
| 4584 | CHIP3434 | STM/STY    | STM0889 | STY0922 | ATGAACG T TAGTCC (ATGAACG  | 1 |
| 4585 | CHIP3060 | STM/STY    | STM2415 | STY2654 | ATGAAAA T TACTGC (ATGAAAA  | 1 |
| 4586 | CHIP3460 | STM specil | STM0917 |         | ATGATGC T TAAATGA (GTGATGC | 1 |
| 4587 | CHIP3476 | STM/STY    | STM0939 | STY0935 | ATGATTC T TAAATCC (ATGATTC | 1 |
| 4588 | CHIP3508 | STM/STY    | STM1002 | STY1006 | ATGCATG T TAAAGCA (ATGCATG | 1 |
| 4589 | CHIP3541 | STM specil | STM4199 |         | ATGACTC T TATGGT (ATGACTC  | 1 |
| 4590 | CHIP4133 | STM specil | STM4110 |         | ATGTGTA T TACAGT (GTGTGTA  | 1 |
| 4591 | CHIP3591 | STM/STY    | STM4290 | STY4489 | ATGCTGA T TATTCA (ATGCTGA  | 1 |
| 4592 | CHIP3607 | STM/STY    | STM4334 | STY4694 | ATGGCGA T TATTTT (ATGGCGA  | 1 |
| 4593 | CHIP3047 | STM/STY    | STM2383 | STY2615 | ATGAAAA T TAGAGT (ATGAAAA  | 1 |
| 4594 | CHIP3063 | STM/STY    | STM2423 | STY2659 | ATGAAAA T TAAAAC (ATGAAAA  | 1 |
| 4595 | CHIP3079 | STM/STY    | STM2476 | STY2713 | ATGCGCT T TAAACGC (ATGCGCT | 1 |
| 4596 | CHIP3095 | STM/STY    | STM2506 |         | ATGAGTC T TAAACGT (GTGAGTC | 0 |
| 4597 | CHIP0274 | STM/STY    | STM2876 | STY2999 | ATGCCAC T TACCGT (ATGCCAC  | 1 |
| 4598 | CHIP3618 | STM/STY    | STM4351 | STY4711 | ATGAAAA T TACTGC (ATGAAAA  | 1 |
| 4599 | CHIP3634 | STM/STY    | STM4392 | STY4748 | ATGACCA T TAGTCT (ATGACCA  | 1 |
| 4600 | CHIP2978 | STM/STY    | STM2259 | STY2485 | ATGAAAC T TACACC (ATGAAAC  | 1 |
| 4601 | CHIP3674 | STM/STY    | STM4482 |         | ATGCCAT T TAAATGC (ATGCCAT | 1 |
| 4602 | CHIP3018 | STM/STY    | STM2335 | STY2565 | ATGGAAA T TAGGCA (ATGGAAA  | 1 |
| 4603 | CHIP3012 | STM/STY    | STM2326 | STY2556 | ATGGTGA T TAGCGG (ATGGTGA  | 1 |
| 4604 | CHIP3708 | STM specil | STM4534 |         | ATGCGCA T TAAAAC (ATGCGCA  | 1 |
| 4605 | CHIP0205 | STM/STY    | STM1954 | STY2162 | ATGAAAT T TATTGG (ATGAAAT  | 1 |
| 4606 | CHIP0221 | STM/STY    | STM3443 | STY4355 | ATGAAAG T TAAATCG (ATGAAAG | 1 |
| 4607 | CHIP2320 | STM/STY    | STM1074 | STY1096 | ATGCGTA T TATTCA (ATGCGTA  | 1 |
| 4608 | CHIP2336 | STM/STY    | STM1222 | STY1262 | ATGAAAA T TAGCGT (ATGAAAA  | 1 |
| 4609 | CHIP0239 | STM/STY    | STM2468 | STY2704 | ATGAAAA T TATACG (GTGAAAA  | 1 |
| 4610 | CHIP2338 | STM/STY    | STM1225 | STY1265 | ATGAAGA T TAAATCG (ATGAAGA | 1 |
| 4611 | CHIP2354 | STM/STY    | STM1328 | STY1783 | ATGAACA T TAGAAG (GTGAACA  | 1 |
| 4612 | CHIP3623 | STM/STY    | STM4371 | STY4728 | ATGGGAA T TATTCG (ATGGGAA  | 1 |
| 4613 | CHIP3639 | STM/STY    | STM4405 | STY4763 | ATGACCT T TATTTAC (ATGACCT | 1 |
| 4614 | CHIP3655 | STM specil | STM4428 |         | ATGCCAG T TAAATGT (ATGCCAG | 1 |
| 4615 | CHIP0482 | STM/STY    | STM1145 | STY1182 | ATGCATA T TACTGT (ATGCATA  | 1 |
| 4616 | CHIP0506 | STM/STY    | STM1862 | STY2000 | ATGCGCA T TATTTCT (ATGCGCA | 1 |
| 4617 | CHIP0530 | STM/STY    | STM1751 | STY1299 | ATGAGCG T TATTCC (ATGAGCG  | 1 |

|      |          |            |         |         |                          |   |
|------|----------|------------|---------|---------|--------------------------|---|
| 4618 | CHIP0546 | STM/STY    | STM1173 | STY1212 | ATGCAAA TTATAGG ATGCAAA  | 1 |
| 4619 | CHIP3993 | STM specil | STM2087 |         | ATGCTTA TTA CTTA ATGCTTA | 1 |
| 4620 | CHIP1325 | STM/STY    | STM3796 | STY3986 | ATGGCAA TTATTCC ATGGCAA  | 1 |
| 4621 | CHIP1415 | STM/STY    | STM3864 | STY3914 | ATGGCAA TTACATC ATGGCAA  | 1 |
| 4622 | CHIP1439 | STM/STY    | STM2641 | STY2834 | ATGATGA TTATCTA ATGATGA  | 1 |
| 4623 | CHIP1367 | STM/STY    | STM0243 | STY0270 | ATGAGCA TTACCGT ATGAGCA  | 1 |
| 4624 | CHIP1383 | STM/STY    | STM0094 | STY0109 | ATGCAGT TTA CTTG ATGCAGT | 1 |
| 4625 | CHIP1495 | STM/STY    | STM2382 | STY2614 | ATGGACA TTAATTC ATGGACA  | 1 |
| 4626 | CHIP3924 | STM/STY    | STM1344 | STY1766 | ATGATTG TTATCGC ATGATTG  | 1 |
| 4627 | CHIP3926 | STM/STY    | STM1348 | STY1762 | ATGGATA TTAGTAC ATGGATA  | 1 |
| 4628 | CHIP0519 | STM/STY    | STM0999 | STY1002 | ATGATGA TTAGAAC ATGATGA  | 1 |
| 4629 | CHIP0543 | STM/STY    | STM3562 | STY4250 | ATGAAAC TTATGCC ATGAAAC  | 1 |
| 4630 | CHIP0559 | STM/STY    | STM1412 | STY1708 | ATGGTGA TTAGAAAT ATGGTGA | 1 |
| 4631 | CHIP1330 | STM/STY    | STM2257 | STY2483 | ATGGCAA TTACCGC ATGGCAA  | 1 |
| 4632 | CHIP1346 | STM/STY    | STM0279 | STY0302 | ATGTCTT TTA AATT ATGTCTT | 0 |
| 4633 | CHIP2020 | STM/STY    | STM4556 | STY4906 | ATGTCTG TTATTTCT ATGTCTG | 1 |
| 4634 | CHIP2044 | STM/STY    | STM3644 | STY4158 | ATGACCC TTATGAG TTGACCC  | 1 |
| 4635 | CHIP3208 | STM/STY    | STM3257 | STY3439 | ATGAAAG TTAGGCG GTGAAAG  | 1 |
| 4636 | CHIP3224 | STM/STY    | STM3281 | STY3462 | ATGAAGC TTATTGC ATGAAGC  | 1 |
| 4637 | CHIP1517 | STM/STY    | STM2414 | STY2653 | ATGAAAA TTAGTCC ATGAAAA  | 1 |
| 4638 | CHIP1533 | STM/STY    | STM2521 | STY2766 | ATGAGCA TTAGATG GTGAGCA  | 0 |
| 4639 | CHIP1567 | STM/STY    | STM0510 | STY0558 | ATGGGAT TTAGGGT ATGGGAT  | 1 |
| 4640 | CHIP1599 | STM/STY    | STM0606 | STY0651 | ATGGCTA TTAATGT ATGGCTA  | 1 |
| 4641 | CHIP3147 | STM specil | STM2603 |         | ATGGGAT TTAACCG ATGGGAT  | 1 |
| 4642 | CHIP2023 | STM/STY    | STM4576 | STY4923 | ATGACAA TTAGCGC ATGACAA  | 1 |
| 4643 | CHIP2039 | STM/STY    | STM3667 | STY4131 | ATGAGCC TTATTCG ATGAGCC  | 1 |
| 4644 | CHIP2055 | STM/STY    | STM3606 | STY4197 | ATGCAGC TTAATTC ATGCAGC  | 1 |
| 4645 | CHIP2057 | STM/STY    | STM3602 | STY4201 | ATGATCG TTATACG ATGATCG  | 1 |
| 4646 | CHIP3221 | STM specil | STM3277 |         | ATGGGGC TTAAGGA ATGGGGC  | 1 |
| 4647 | CHIP0983 | STM/STY    | STM4457 | STY4797 | ATGGTAA TTATTCA ATGGTAA  | 1 |
| 4648 | CHIP1015 | STM/STY    | STM1379 | STY1743 | ATGAAAA TTAATCG ATGAAAA  | 1 |
| 4649 | CHIP1031 | STM/STY    | STM4293 | STY4492 | ATGTTAA TTATTCG ATGTTAA  | 1 |
| 4650 | CHIP1047 | STM/STY    | STM1169 | STY1207 | ATGAGAA TTATTCG GTGAGAA  | 1 |
| 4651 | CHIP0753 | STM/STY    | STM2458 | STY2695 | ATGAAAC TTAGAAG ATGAAAC  | 1 |
| 4652 | CHIP1820 | STM/STY    | STM4028 | STY3850 | ATGATTG TTATACC ATGATTG  | 1 |
| 4653 | CHIP1852 | STM/STY    | STM0633 | STY0683 | ATGAGTA TTATTTCT ATGAGTA | 1 |
| 4654 | CHIP0578 | STM/STY    | STM1420 | STY1700 | ATGAATG TTAACCA ATGAATG  | 1 |
| 4655 | CHIP0594 | STM/STY    | STM2035 | STY2240 | ATGGCGC TTATAAT ATGGCGC  | 1 |
| 4656 | CHIP0610 | STM/STY    | STM3699 | STY4096 | ATGCCGT TTAGATG ATGCCGT  | 1 |
| 4657 | CHIP1831 | STM/STY    | STM0811 | STY0846 | ATGGCTA TTATTTCT ATGGCTA | 1 |
| 4658 | CHIP1863 | STM/STY    | STM0783 | STY0816 | ATGCTGG TTAGGCG ATGCTGG  | 1 |
| 4659 | CHIP0581 | STM/STY    | STM1378 | STY1744 | ATGAAAA TTAGAGT ATGAAAA  | 1 |
| 4660 | CHIP0693 | STM/STY    | STM2351 | STY2581 | ATGATGT TTATTTCT ATGATGT | 1 |
| 4661 | CHIP0621 | STM/STY    | STM0113 | STY0132 | ATGAGCC TTACACG ATGAGCC  | 1 |
| 4662 | CHIP0637 | STM/STY    | STM0209 | STY0231 | ATGAAAA TTA CTGC ATGAAAA | 1 |
| 4663 | CHIP0688 | STM/STY    | STM0451 | STY0493 | ATGAATA TTAGTTT GTGAATA  | 1 |
| 4664 | CHIP0624 | STM/STY    | STM3409 | STY4388 | ATGAAAA TTAGAGG ATGAAAA  | 1 |
| 4665 | CHIP0736 | STM/STY    | STM2881 | STY3004 | ATGAATA TTA CACC ATGAATA | 1 |
| 4666 | CHIP0760 | STM/STY    | STM0546 | STY0593 | ATGAAGA TTATGAC ATGAAGA  | 1 |
| 4667 | CHIP1835 | STM/STY    | STM0729 | STY0772 | ATGCCGA TTA CAAA ATGCCGA | 1 |
| 4668 | CHIP1867 | STM/STY    | STM0739 | STY0782 | ATGTCCG TTATTTT ATGTCCG  | 1 |
| 4669 | CHIP0131 | STM/STY    | STM4174 | STY3711 | ATGATAC TTAACGG GTGATAC  | 1 |

|      |          |            |         |         |                          |   |
|------|----------|------------|---------|---------|--------------------------|---|
| 4670 | CHIP0147 | STM/STY    | STM3593 | STY4210 | ATGCAAA T TACTCC GTGCAAA | 1 |
| 4671 | CHIP0179 | STM/STY    | STM2040 | STY2245 | ATGAGAT TTAATCA ATGAGAT  | 1 |
| 4672 | CHIP0395 | STM/STY    | STM2883 |         | ATGCTTA TTATCCT ATGCTTA  | 1 |
| 4673 | CHIP0411 | STM/STY    | STM2322 | STY2552 | ATGAGTT TTATTGC ATGAGTT  | 1 |
| 4674 | CHIP1270 | STM/STY    | STM3364 | STY3545 | ATGGGCA TTAGCTA ATGGGCA  | 1 |
| 4675 | CHIP0437 | STM/STY    | STM4257 | STY4452 | ATGGAAG TTAGATA ATGGAAG  | 0 |
| 4676 | CHIP1288 | STM/STY    | STM2669 | STY2856 | ATGGTTG TTATGGT ATGGTTG  | 1 |
| 4677 | CHIP0477 | STM/STY    | STM1140 | STY1177 | ATGCGTG TTAATAA ATGCGTG  | 1 |
| 4678 | CHIP0110 | STM/STY    | STM4024 | STY3854 | ATGGTTC TTATACA ATGGTTC  | 1 |
| 4679 | CHIP0126 | STM/STY    | STM4169 | STY3716 | ATGTTAC TTATTGC ATGTTAC  | 1 |
| 4680 | CHIP4733 | STM/STY    | STM2846 | STY2968 | ATGAGCC TTAGTCA ATGAGCC  | 1 |
| 4681 | CHIP0144 | STM/STY    | STM4017 | STY3861 | ATGTCTA TTAATTA ATGTCTA  | 1 |
| 4682 | CHIP0160 | STM/STY    | STM0670 | STY0716 | ATGACTA TTAAGGC ATGACTA  | 1 |
| 4683 | CHIP4375 | STM/STY    | STM0456 | STY0498 | ATGATCA TTACGGA ATCAATA  | 1 |
| 4684 | CHIP1235 | STM/STY    | STM4277 | STY4475 | ATGGCAA TTATTGG ATGGCAA  | 1 |
| 4685 | CHIP1259 | STM/STY    | STM1669 | STY1395 | ATGGTTT TTAATTC GTGGTTT  | 1 |
| 4686 | CHIP1275 | STM/STY    | STM3383 | STY3563 | ATGCCAT TTATTTCA TGCCAT  | 1 |
| 4687 | CHIP1741 | STM/STY    | STM2988 | STY3128 | ATGAAAG TTAGCCG ATGAAAG  | 1 |
| 4688 | CHIP1757 | STM/STY    | STM2916 | STY3041 | ATGACGA TTATCTC ATGACGA  | 1 |
| 4689 | CHIP1781 | STM/STY    | STM4058 | STY3813 | ATGATAG TTAGGTT ATGATAG  | 1 |
| 4690 | CHIP0512 | STM/STY    | STM0864 | STY0897 | ATGAAAC TTAATTT AACCGC   | 1 |
| 4691 | CHIP0043 | STM/STY    | STM3943 | STY3616 | ATGAACG TTAGCGA ATGAACG  | 1 |
| 4692 | CHIP0075 | STM/STY    | STM3904 | STY3653 | ATGCCTA TTAACCT ATGCCTA  | 1 |
| 4693 | CHIP1401 | STM/STY    | STM0073 | STY0083 | ATGATGA TTAAGCG ATGACGA  | 1 |
| 4694 | CHIP0077 | STM/STY    | STM3902 | STY3655 | ATGCAAC TTAGGCG ATGCAAC  | 1 |
| 4695 | CHIP3102 | STM/STY    | STM2524 | STY2769 | ATGATGA TTACCGG ATGAATA  | 1 |
| 4696 | CHIP1712 | STM/STY    | STM1814 | STY1944 | ATGATAA TTAATTC ATGATAA  | 1 |
| 4697 | CHIP1728 | STM/STY    | STM1730 | STY1321 | ATGAATT TTATTTT ATGAATT  | 1 |
| 4698 | CHIP1744 | STM/STY    | STM2974 | STY3113 | ATGGAAC T TACTCT ATGGAAC | 1 |
| 4699 | CHIP1770 | STM/STY    | STM2936 | STY3061 | ATGTTTT TTAGGAC ATGTTTT  | 1 |
| 4700 | CHIP0024 | STM/STY    | STM3963 | STY3596 | ATGGCGC TTATTCG GTGGCGC  | 0 |
| 4701 | CHIP0048 | STM/STY    | STM3938 | STY3621 | ATGACGC TTATGCG ATGACGC  | 1 |
| 4702 | CHIP0088 | STM/STY    | STM4147 | STY3738 | ATGAGTG TTAGAAC ATGAGTG  | 1 |
| 4703 | CHIP1707 | STM/STY    | STM1826 | STY1956 | ATGCGCA TTAATCA ATGCGCA  | 1 |
| 4704 | CHIP1723 | STM/STY    | STM1771 | STY1281 | ATGACAC TTAGGCA ATGACAC  | 1 |
| 4705 | CHIP2873 | STM/STY    | STM1781 | STY1907 | ATGATGC T TAACTG GTGATGC | 1 |
| 4706 | CHIP2897 | STM/STY    | STM1832 | STY1961 | ATGAGCC TTACTGG GTGAGCC  | 1 |
| 4707 | CHIP2921 | STM/STY    | STM1874 | STY2080 | ATGATGC TTAATAA ATGATGC  | 1 |
| 4708 | CHIP2937 | STM/STY    | STM1901 | STY2109 | ATGCGTA TTAGTTA ATGCGTA  | 1 |
| 4709 | CHIP4410 | STM/STY    | STM0518 | STY0566 | ATGTTAC TTAACGG ATGTTAC  | 1 |
| 4710 | CHIP4426 | STM/STY    | STM0540 | STY0586 | ATGCCTA TTATTCAT ATGCCTA | 1 |
| 4711 | CHIP4436 | STM/STY    | STM0567 | STY0615 | ATGAATA TTACCCT ATGAATA  | 1 |
| 4712 | CHIP1192 | STM/STY    | STM1584 | STY1481 | ATGAAAA TTATGTC ATGAAAA  | 1 |
| 4713 | CHIP1216 | STM/STY    | STM1618 | STY1446 | ATGCTGA TTAACGC ATGCTGA  | 1 |
| 4714 | CHIP2764 | STM/STY    | STM1558 | STY1505 | ATGACAA TTAGGGC ATGACAA  | 1 |
| 4715 | CHIP2884 | STM/STY    | STM1803 | STY1931 | ATGCGAG TTAGTTA ATGCGAG  | 1 |
| 4716 | CHIP2804 | STM specil | STM1627 |         | ATGAAAT TTAGTTA ATGAAAT  | 1 |
| 4717 | CHIP2814 | STM/STY    | STM1639 | STY1431 | ATGGGCA TTAGTCA ATGGGCA  | 1 |
| 4718 | CHIP2830 | STM/STY    | STM1667 | STY1397 | ATGACGC TTAGTAA ATGACGC  | 1 |
| 4719 | CHIP2846 | STM/STY    | STM1703 | STY1349 | ATGATGA TTAACGC ATGATGA  | 1 |
| 4720 | CHIP1147 | STM/STY    | STM0626 | STY0675 | ATGACAG TTAGCCG ATGACAG  | 1 |
| 4721 | CHIP1163 | STM/STY    | STM0985 | STY0986 | ATGATTG TTAGCGA ATGATTG  | 1 |

|      |          |            |         |         |                            |   |
|------|----------|------------|---------|---------|----------------------------|---|
| 4722 | CHIP1179 | STM/STY    | STM0963 | STY0961 | ATGCTCG TTAGCCG ATGCTCG    | 1 |
| 4723 | CHIP4257 | STM/STY    | STM3098 | STY3251 | ATGTCAT( TTACTGG ATGTCAT(  | 1 |
| 4724 | CHIP4377 | STM/STY    | STM0458 | STY0501 | ATGATGA TTAGTCG ATGATGA    | 1 |
| 4725 | CHIP2473 | STM/STY    | STM3598 | STY4203 | ATGAAAA' TTAATAC( ATGAAAA' | 1 |
| 4726 | CHIP4609 | STM/STY    | STM3048 | STY3204 | ATGGCTT TTACTCT' ATGGCTT   | 1 |
| 4727 | CHIP2513 | STM/STY    | STM3684 | STY4112 | ATGAAAC' TTAAGCC ATGAAAC'  | 1 |
| 4728 | CHIP2537 | STM/STY    | STM3755 |         | ATGGCAG TTACTTTT( ATGGCAG  | 1 |
| 4729 | CHIP4659 | STM/STY    | STM3178 | STY3355 | ATGAAAT' TTACCAA( ATGAAAT' | 1 |
| 4730 | CHIP4308 | STM/STY    | STM2684 | STY2870 | ATGTTGG TTACGCC ATGTTGG    | 1 |
| 4731 | CHIP4236 | STM/STY    | STM3046 | STY3202 | ATGGTCC TTAGTGT' GTGGTCC   | 1 |
| 4732 | CHIP4268 | STM specil | STM3122 |         | ATGAAAA' TTATTGG' GTGAAAA  | 1 |
| 4733 | CHIP2468 | STM/STY    | STM3585 | STY4225 | ATGCGCC TTACGCC ATGCGCC    | 1 |
| 4734 | CHIP2484 | STM/STY    | STM3622 | STY4178 | ATGAGGC TTATGAT( ATGAGGC   | 1 |
| 4735 | CHIP2534 | STM/STY    | STM3747 | STY4046 | ATGTCCG TTACGGT ATGTCCG    | 1 |
| 4736 | CHIP4303 | STM/STY    | STM2672 | STY2859 | ATGAATA' TTAGTTT( ATGAATA' | 1 |
| 4737 | CHIP4319 | STM/STY    | STM2702 | STY4608 | ATGCAA' TTAACGC GTGCAA     | 1 |
| 4738 | CHIP4255 | STM/STY    | STM3090 | STY3243 | ATGGCAA TTATTT( ATGGCAA    | 1 |
| 4739 | CHIP4367 | STM/STY    | STM0444 | STY0486 | ATGTCAA' TTACAGC ATGTCAA'  | 1 |
| 4740 | CHIP2471 | STM specil | STM3595 |         | ATGAAAC' TTAGCGC ATGAAAC'  | 1 |
| 4741 | CHIP4553 | STM/STY    | STM2127 | STY2340 | ATGCAGG TTACGCC ATGCAGG    | 1 |
| 4742 | CHIP4569 | STM/STY    | STM2171 | STY2401 | ATGACCA TTATTTT( ATGACCA   | 1 |
| 4743 | CHIP1901 | STM/STY    | STM3413 | STY4385 | ATGTGGT TTAATTA( ATGTGGT   | 1 |
| 4744 | CHIP1925 | STM/STY    | STM0942 | STY0938 | ATGACGG TTACTCC( ATGACGG   | 1 |
| 4745 | CHIP1949 | STM/STY    | STM4388 | STY4744 | ATGCAA' TTACTTC' ATGCAA'   | 1 |
| 4746 | CHIP1965 | STM/STY    | STM4479 | STY4817 | ATGATAA' TTATACC( GTGATAA' | 1 |
| 4747 | CHIP1927 | STM/STY    | STM0931 | STY0927 | ATGAAAG TTAATCC' ATGAAAG   | 1 |
| 4748 | CHIP1943 | STM/STY    | STM4367 | STY4724 | ATGCAGT TTACTCC( GTGCAGT   | 1 |
| 4749 | CHIP2151 | STM/STY    | STM3245 | STY3428 | ATGAATA( TTATTCA( ATGAATA( | 1 |
| 4750 | CHIP2167 | STM/STY    | STM3147 | STY3318 | ATGAGCC TTACAAA( ATGAGCC   | 1 |
| 4751 | CHIP1608 | STM/STY    | STM2834 | STY2955 | ATGAGCC TTAAGCG ATGAGCC    | 1 |
| 4752 | CHIP1624 | STM/STY    | STM2842 | STY2964 | ATGGCGA TTACACT' ATGGCGA   | 1 |
| 4753 | CHIP4486 | STM specil | STM0354 |         | ATGAACA' TTACAGA( ATGAACA' | 1 |
| 4754 | CHIP1626 | STM/STY    | STM2848 | STY2970 | ATGTTTA( TTAGCTG ATGTTTA(  | 1 |
| 4755 | CHIP1650 | STM/STY    | STM2224 | STY2461 | ATGTTTA( TTACGCG ATGTTTA(  | 1 |
| 4756 | CHIP1666 | STM/STY    | STM2110 | STY2322 | ATGCAGG TTAGGGA ATGCAGG    | 1 |
| 4757 | CHIP1682 | STM/STY    | STM2199 | STY2434 | ATGTTTA( TTAGAAA( ATGTTTA( | 1 |
| 4758 | CHIP1698 | STM/STY    | STM1772 | STY1897 | ATGAAAC' TTAGTTC' ATGAAAC' | 1 |
| 4759 | CHIP2252 | STM/STY    | STM3094 | STY3247 | ATGCCCT TTATCCT( ATGCCCT   | 1 |
| 4760 | CHIP3328 | STM/STY    | STM0718 | STY0758 | ATGCAGA TTAGCAT( ATGCAGA   | 1 |
| 4761 | CHIP3376 | STM/STY    | STM0798 | STY0831 | ATGAGTA TTAGGAC ATGAGTA    | 1 |
| 4762 | CHIP3416 | STM specil | STM0857 |         | ATGAAAA' TTAGAAT( ATGAAAA' | 1 |
| 4763 | CHIP2197 | STM/STY    | STM3324 | STY3503 | ATGACCG TTAGTCT' ATGACCG   | 1 |
| 4764 | CHIP0330 | STM/STY    | STM3761 | STY4025 | ATGTCTA( TTATGCG ATGTCTA(  | 1 |
| 4765 | CHIP3403 | STM/STY    | STM0838 | STY0879 | ATGTTAG' TTACTCG( GTGTTAG  | 1 |
| 4766 | CHIP2192 | STM/STY    | STM3348 | STY3528 | ATGAAAA' TTAGCGC ATGAAAA'  | 1 |
| 4767 | CHIP2208 | STM/STY    | STM3260 | STY3443 | ATGTTTA( TTAAGAG ATGTTTA(  | 1 |
| 4768 | CHIP2232 | STM/STY    | STM3193 | STY3371 | ATGTCAT( TTATTTT( ATGTCAT( | 1 |
| 4769 | CHIP0373 | STM/STY    | STM2266 | STY2492 | ATGAAAA' TTAATTC( ATGAAAA' | 1 |
| 4770 | CHIP3340 | STM/STY    | STM0744 | STY0790 | ATGAATA' TTACTGC ATGAATA'  | 1 |
| 4771 | CHIP2203 | STM/STY    | STM3300 | STY3479 | ATGCGAT TTAGTTA' ATGCGAT   | 1 |
| 4772 | CHIP2219 | STM/STY    | STM3229 | STY3409 | ATGTCGA TTAACGA( ATGTCGA   | 1 |
| 4773 | CHIP0352 | STM/STY    | STM3649 | STY4153 | ATGTCCG TTACAGG ATGTCCG    | 1 |

|      |          |              |         |         |                           |   |
|------|----------|--------------|---------|---------|---------------------------|---|
| 4774 | CHIP2259 | STM/STY      | STM3071 | STY3229 | ATGACTG TTAACGG ATGACTG   | 1 |
| 4775 | CHIP3335 | STM/STY      | STM0731 | STY0774 | ATGTCAC TTATGGG GTGTCAC   | 1 |
| 4776 | CHIP3367 | STM/STY      | STM0789 | STY0822 | ATGTATT(TTAGGAG ATGTATT   | 1 |
| 4777 | CHIP0485 | STM/STY      | STM0741 | STY0787 | ATGATCG TTAGTAC,ATGATCG   | 1 |
| 4778 | CHIP0495 | STM/STY      | STM3728 | STY4066 | ATGTCCC TTAGTAC' ATGTCCC  | 1 |
| 4779 | CHIP0535 | STM/STY      | STM2872 | STY2993 | ATGTCGA TTATGAG ATGTCGA   | 1 |
| 4780 | CHIP0560 | STM/STY      | STM1413 | STY1707 | ATGGATT TTAAGAA(ATGGATT   | 1 |
| 4781 | CHIP1691 | STM/STY      | STM1823 | STY1953 | ATGTTTG(TTATTTCG' ATGTTTG | 1 |
| 4782 | CHIP4435 | STM/STY      | STM0565 | STY0613 | ATGTTAA TTATTTATATGTTAA   | 1 |
| 4783 | CHIP0966 | STM/STY      | STM4158 |         | ATGGGTT TTACCCC ATGGGTT   | 1 |
| 4784 | CHIP0984 | STM/STY      | STM1389 | STY1731 | ATGAATA TTAGGTG ATGAATA   | 1 |
| 4785 | CHIP2124 | STM/STY      | STM3507 | STY4289 | ATGGCTT TTAACGC ATGGCTT   | 1 |
| 4786 | CHIP0089 | STM/STY      | STM4148 | STY3737 | ATGTCTG TTACGCT ATGTCTG   | 1 |
| 4787 | CHIP0082 | STM/STY      | STM3897 | STY3708 | ATGGAGA TTATTGT GTGGAGA   | 1 |
| 4788 | CHIP0008 | STM/STY      | STM3980 | STY3579 | ATGAAAT TTAGTTT ATGAAAT   | 1 |
| 4789 | CHIP1209 | STM/STY      |         |         | ATGAAAC TTATCCA(ATGAAAC   | 0 |
| 4790 | CHIP1193 | STM/STY      | STM1590 | STY1475 | ATGATGA TTAGCGG ATGACGA   | 1 |
| 4791 | CHIP0903 | STM/STY      | STM0102 | STY0119 | ATGGTAT TTACGTT GTATGGT   | 1 |
| 4792 | CHIP3968 | STM/STY      | STM1465 | STY1657 | ATGGTGC TTATGCC ATGGTGC   | 1 |
| 4793 | CHIP4690 | STM/STY      | STM1248 | STY1876 | ATGTTCC TTAAGTGG ATGTTCC  | 1 |
| 4794 | CHIP4740 | STM/STY      | STM2880 | STY3003 | ATGAAAA TTATAAG ATGAAAA   | 1 |
| 4795 | CHIP4091 | STM/STY      | STM2796 | STY2916 | ATGGGTT TTAATGA(ATGGGTT   | 1 |
| 4796 | CHIP4331 | STM/STY      | STM0114 | STY0133 | ATGTCAC TTAATGT ATGTCAC   | 1 |
| 4797 | CHIP4318 | STM/STY      | STM2698 | STY4604 | ATGGCGC TTAAGTCA GTGGCGC  | 1 |
| 4798 | CHIP4497 | STM/STY      | STM0707 |         | ATGAGTG TTAGAAC GTGAGTG   | 1 |
| 4799 | CHIP2743 | STM/STY      | STM1529 |         | ATGCCTT TTAATG' ATGCCTT   | 0 |
| 4800 | CHIP4515 | STM/STY      | STM3797 | STY3985 | ATGAACC TTACGGC ATGAACC   | 1 |
| 4801 | CHIP3226 | STM/STY      | STM3288 | STY3469 | ATGATTA(TTAAAAG' ATGATTA  | 1 |
| 4802 | CHIP3230 | STM/STY      | STM3294 | STY3472 | ATGAGTA TTAACGC ATGAGTA   | 1 |
| 4803 | CHIP3515 | STM/STY      | STM1022 | STY1036 | ATGAATC TTATCGA ATGAATC   | 1 |
| 4804 | CHIP3516 | STM specil   | STM1023 |         | ATGCCTG TTAAGC ATGCCTG    | 1 |
| 4805 | CHIP3479 | STM specil   | STM0947 |         | ATGCAGC TTAGTCC ATGCAGC   | 1 |
| 4806 | CHIP3339 | STM/STY      | STM0743 | STY0789 | ATGAAGT TTACAAG ATGAAGT   | 1 |
| 4807 | CHIP1086 | STM specil   | PSLT072 |         | ATGTATA TTATCGG ATGTATA   | 1 |
| 4808 | CHIP1118 | STM specil   | PSLT110 |         | ATGACGA TTACATC ATGACGA   | 1 |
| 4809 | CHIP1087 | STM specil   | PSLT073 |         | ATGGCTA TTATTCT ATGGCTA   | 1 |
| 4810 | CHIP0425 | STM/STY      | PSLT011 | STY4845 | ATGACGA TTAGTCT GTGACGA   | 1 |
| 4811 | CHIP0427 | STM specil   | PSLT009 |         | ATGAAAA TTAGAAC ATGAAAA   | 1 |
| 4812 | CHIP0167 | STM specil   | PSLT075 |         | ATGTGTC TTAAGTAA ATGTGTC  | 1 |
| 4813 | CHIP4755 | STM/STY      | STM1861 |         | ATGAAAA AGGATGA ATGAAAA   | 1 |
| 4814 | CHIP4759 | STM/STY      |         |         | GACAAAT CGCCAGC GACAAAT   | 0 |
| 4815 | CHIP4763 | STM/STY      | STM1995 |         | ATATGCT CTGGTAG ATATGCT   | 1 |
| 4816 | CHIP4767 | STM/STY      |         |         | GGGCAGC AATGATC GGGCAGC   | 0 |
| 4817 | CHIP4771 | STM/STY      |         |         | AAACGCT TTCAATA AAACGCT   | 0 |
| 4818 | CHIP4775 | STM/STY      | STM2211 |         | GAAAGCC AATGCGG GAAAGCC   | 1 |
| 4819 | CHIP4851 | STM/STY      |         |         | TGCTGAC CGCCAGA TGCTGAC   | 0 |
| 4820 | CHIP4855 | STM/STY      |         |         | TCATTGT TTAATGA TCATTGT   | 0 |
| 4821 | CHIP4859 | STM/STY      |         |         | CGATATG CGGAAAA CGATATG   | 0 |
| 4822 | CHIP4863 | STM/STY      |         |         | CGCAGCA GCCGCGT CGCAGCA   | 0 |
| 4823 | CHIP4867 | STM specil   | STM1046 |         | AACGATG TCCAGCC AACGATG   | 1 |
| 4824 | CTRL006  | none         |         |         | human plac                | 0 |
| 4825 | CHIP5120 | STY specific |         | STY2061 | ATGTCGT TTAAGTAA ATGTCGT  | 0 |

|      |          |              |         |         |                         |   |
|------|----------|--------------|---------|---------|-------------------------|---|
| 4826 | CHIP5136 | STY specific |         | STY2077 | ATGCAGC TTAGAGC ATGCAGC | 0 |
| 4827 | CHIP5152 | STY specific |         | STY2356 | ATGGGCC TTAATCA ATGGGCC | 0 |
| 4828 | CHIP5174 | STY specific |         | STY2885 | ATGGCAG TTAATCA GTGGCAG | 0 |
| 4829 | CHIP4911 | STY specific |         | STY0115 | ATGATGC TTAGCGT ATGATGC | 0 |
| 4830 | CHIP4927 | STY specific |         | STY0312 | ATGTTCA TTATTCA ATGTTCA | 0 |
| 4831 | CHIP5220 | STY specific |         | STY3644 | ATGCAAC TTATTGC ATGCAAC | 0 |
| 4832 | CHIP5235 | STY specific |         | STY3672 | ATGCCAT TTATTCT ATGCCAT | 0 |
| 4833 | CHIP5250 | STY specific |         | STY3688 | ATGACGC TTAATCA ATGACGC | 0 |
| 4834 | CHIP5184 | STY specific |         | STY3066 | ATGTATC TTAGCGT ATGTATC | 0 |
| 4835 | CHIP4921 | STY specific |         | STY0296 | ATGACAT TAAAAA ATGACAT  | 0 |
| 4836 | CHIP4937 | STY specific |         | STY0345 | ATGAATT TTAATTT ATGAATT | 0 |
| 4837 | CHIP5237 | STY specific |         | STY3674 | ATGGGAA TTATGGG ATGGGAA | 0 |
| 4838 | CHIP5252 | STY specific |         | STY3690 | ATGAATA TTATGGA ATGAATA | 0 |
| 4839 | CHIP5267 | STY specific |         | STY3922 | ATGCGCT TTAGTTC ATGCGCT | 0 |
| 4840 | CHIP5010 | STY specific |         | STY1367 | ATGAAAC TTATGCT GTGAAAC | 0 |
| 4841 | CHIP5026 | STY specific |         | STY1601 | ATGGCAA TTAATGC ATGGCAA | 0 |
| 4842 | CHIP5042 | STY specific |         | STY1618 | ATGGCTT TTAGCGA ATGGCTT | 0 |
| 4843 | CHIP5172 | STY specific |         | STY2883 | ATGATGA TTACGAC ATGATGA | 0 |
| 4844 | CHIP5188 | STY specific |         | STY3070 | ATGGATT TTATTCC ATGGATT | 0 |
| 4845 | CHIP5371 | STM/STY      |         | STY4627 | ATGAACA TAAAAA ATGAACA  | 0 |
| 4846 | CHIP5383 | STY specific |         | STY4651 | ATGAGCT TTAATA ATGAGCT  | 0 |
| 4847 | CHIP5401 | STY specific |         | STY4676 | ATGGGGA TTAATCA ATGGGGA | 0 |
| 4848 | CHIP5417 | STY specific |         | STY4829 | ATGATGA TTATGCG ATGATGA | 0 |
| 4849 | CHIP5324 | STY specific |         | STY4560 | ATGGTCA TTAATGC ATGGTCA | 0 |
| 4850 | CHIP5338 | STY specific |         | STY4577 | ATGAGAT TTATTGG ATGAGAT | 0 |
| 4851 | CHIP5436 | STM/STY      |         | STY4883 | ATGAACA TTATTCC ATGAACA | 0 |
| 4852 | CHIP5375 | STM/STY      |         | STY4635 | ATGGCAG TTAATCA GTGGCAG | 0 |
| 4853 | CHIP5387 | STY specific |         | STY4656 | ATGATTA TTAACGA ATGATTA | 0 |
| 4854 | CHIP5398 | STY specific |         | STY4673 | ATGACGC TTAGTAA ATGACGC | 0 |
| 4855 | buffer   | none         |         |         | buffer                  | 0 |
| 4856 | empty    | none         |         |         | empty                   | 0 |
| 4857 | empty    | none         |         |         | empty                   | 0 |
| 4858 | empty    | none         |         |         | empty                   | 0 |
| 4859 | empty    | none         |         |         | empty                   | 0 |
| 4860 | empty    | none         |         |         | empty                   | 0 |
| 4861 | CHIP0779 | STM/STY      | STM4291 | STY4490 | ATGCGTT TTATGCC ATGCGTT | 1 |
| 4862 | CHIP2586 | STM specil   | STM3844 |         | ATGGCAC TTATACG ATGGCAC | 1 |
| 4863 | CHIP2602 | STM/STY      | STM3874 | STY3904 | ATGTTTT TTAAGCG ATGTTTT | 1 |
| 4864 | CHIP0835 | STM/STY      | STM3320 | STY3499 | ATGAAGC TTAACC ATGAAGC  | 1 |
| 4865 | CHIP0851 | STM/STY      | STM3181 | STY3359 | ATGACGC TTACACG ATGACGC | 1 |
| 4866 | CHIP3234 | STM/STY      | STM3304 | STY3483 | ATGTACG TTAAGCG ATGTACG | 1 |
| 4867 | CHIP2636 | STM/STY      | STM0063 | STY0072 | ATGAACG TTAATCA ATGAACG | 1 |
| 4868 | CHIP2668 | STM/STY      | STM0134 | STY0154 | ATGATCA TTATGCC ATGATCA | 1 |
| 4869 | CHIP2684 | STM/STY      | STM0167 | STY0189 | ATGAAGA TTAATTA ATGAAGA | 1 |
| 4870 | CHIP2700 | STM/STY      | STM0185 | STY0210 | ATGACAG TTAGCGA ATGACAG | 1 |
| 4871 | CHIP2716 | STM/STY      | STM0222 | STY0245 | ATGCTGG TTAGAGC ATGCTGG | 1 |
| 4872 | CHIP2732 | STM/STY      | STM1506 |         | ATGAAAA TTAATTT ATGAAAA | 1 |
| 4873 | CHIP3262 | STM/STY      | STM3369 | STY3549 | ATGAGGC TTATTGC GTGAGGC | 1 |
| 4874 | CHIP3278 | STM/STY      | STM0631 | STY0680 | ATGTTCC TTATAAT ATGTTCC | 1 |
| 4875 | CHIP3294 | STM specil   | STM0655 |         | ATGGATA TTATAGA ATGGATA | 1 |
| 4876 | CHIP3310 | STM/STY      | STM0687 | STY0725 | ATGCGTA TTAGAAA ATGCGTA | 1 |
| 4877 | CHIP3326 | STM/STY      | STM0714 | STY0754 | ATGAACA TTAGGCA ATGAACA | 1 |

|      |          |            |         |         |                            |   |
|------|----------|------------|---------|---------|----------------------------|---|
| 4878 | CHIP0792 | STM/STY    | STM2398 | STY2635 | ATGTTTCG TTATTTTC/ATGTTTCG | 1 |
| 4879 | CHIP4001 | STM/STY    | STM2101 | STY2311 | ATGAAAT TTATTGC/ATGAAAT    | 1 |
| 4880 | CHIP3729 | STM specil | STM4575 |         | ATGAAAA TTACAGA ATGAAAA    | 1 |
| 4881 | CHIP3753 | STM/STY    | STM0282 | STY0305 | ATGACAG TTAAGTGT/ATGACAG   | 1 |
| 4882 | CHIP4065 | STM specil | STM2758 |         | ATGAAAA TTAGTGT/ATGAAAA    | 1 |
| 4883 | CHIP4081 | STM/STY    | STM2780 | STY2897 | ATGGCTA TTAATA/ATGGCTA     | 1 |
| 4884 | CHIP1121 | STM specil | STM1044 |         | ATGAAAT TTATTTTC/ATGAAAT   | 1 |
| 4885 | CHIP3747 | STM/STY    | STM0272 | STY0294 | ATGGAAA TTAGCAA/ATGGAAA    | 1 |
| 4886 | CHIP4059 | STM specil | STM2752 |         | ATGAACA TTAGAAT/ATGAACA    | 1 |
| 4887 | CHIP3787 | STM/STY    | STM0335 | STY0368 | ATGAAAT TTAGCAT/ATGAAAT    | 1 |
| 4888 | CHIP3811 | STM/STY    | STM1088 | STY1117 | ATGCCAA TTAATA/ATGCCAA     | 1 |
| 4889 | CHIP2387 | STM/STY    | STM3412 | STY4386 | ATGTATC TTAACAT/ATGTATC    | 1 |
| 4890 | CHIP2403 | STM/STY    | STM3465 | STY4332 | ATGCAAG TTACGCC/ATGCAAG    | 1 |
| 4891 | CHIP3805 | STM/STY    | STM1080 | STY1103 | ATGACTG TTACATG/ATGACTG    | 1 |
| 4892 | CHIP2381 | STM/STY    | STM1502 | STY1561 | ATGACAA TTAAGTGT/ATGACAA   | 1 |
| 4893 | CHIP2397 | STM/STY    | STM3455 | STY4343 | ATGAAAG TTAATGG/ATGAAAG    | 1 |
| 4894 | CHIP2413 | STM/STY    | STM3492 | STY4304 | ATGGCTT TTAGCGT/ATGGCTT    | 1 |
| 4895 | CHIP3877 | STM/STY    | STM1238 | STY1278 | ATGGAAA TTACATA/ATGGAAA    | 1 |
| 4896 | CHIP3893 | STM/STY    | STM1279 | STY1839 | ATGATTG TTAATTG/ATGATTG    | 1 |
| 4897 | CHIP2399 | STM/STY    | STM3457 | STY4341 | ATGGAAG TTAATGG/ATGGAAG    | 1 |
| 4898 | CHIP3863 | STM/STY    | STM1209 | STY1249 | ATGGGCC TTAATGA/ATGGGCC    | 1 |
| 4899 | CHIP3879 | STM/STY    | STM1251 | STY1871 | ATGGCAC TTATGAT/ATGGCAC    | 1 |
| 4900 | CHIP2455 | STM specil | STM3559 |         | ATGTTTA TTATTTA/ATGTTTA    | 1 |
| 4901 | CHIP4104 | STM/STY    | STM4045 | STY3828 | ATGCAAA TTAGTAC/ATGCAAA    | 1 |
| 4902 | CHIP3552 | STM specil | STM4210 |         | ATGTATG TTACAGA/ATGTATG    | 1 |
| 4903 | CHIP4114 | STM/STY    | STM4076 | STY3794 | ATGATGA TTATGCC/ATGATGA    | 1 |
| 4904 | CHIP4130 | STM specil | STM4107 |         | ATGAAAT TTAATGC/ATGAAAT    | 1 |
| 4905 | CHIP4154 | STM/STY    | STM2860 | STY2982 | ATGCCTG TTAATTC/ATGCCTG    | 1 |
| 4906 | CHIP4170 | STM/STY    | STM2918 | STY3043 | ATGACAA TTAACAT/ATGACAA    | 1 |
| 4907 | CHIP3042 | STM/STY    | STM2377 | STY2608 | ATGCCAA TTATTCC/ATGCCAA    | 1 |
| 4908 | CHIP3058 | STM/STY    | STM2410 | STY2651 | ATGCCGC TTATTTG/ATGCCGC    | 1 |
| 4909 | CHIP3444 | STM specil | STM0900 |         | ATGCTGC TTACGCT/ATGCTGC    | 1 |
| 4910 | CHIP3084 | STM/STY    | STM2485 | STY2723 | ATGTCTG TTATCCG/ATGTCTG    | 1 |
| 4911 | CHIP3484 | STM/STY    | STM0957 | STY0955 | ATGAATA TTAATA/ATGAATA     | 1 |
| 4912 | CHIP3132 | STM specil | STM2588 |         | ATGCCAG TTATGCC/ATGCCAG    | 0 |
| 4913 | CHIP4117 | STM/STY    | STM4082 | STY3788 | ATGAAGC TTAATTC/ATGAAGC    | 1 |
| 4914 | CHIP3565 | STM/STY    | STM4225 | STY4421 | ATGAAAA TTAACGG/ATGAAAA    | 1 |
| 4915 | CHIP4167 | STM/STY    | STM2913 | STY3038 | ATGACAA TTAATCC/ATGACAA    | 1 |
| 4916 | CHIP4183 | STM specil | STM2938 |         | ATGACGT TTAACCA/ATGACGT    | 1 |
| 4917 | CHIP3431 | STM/STY    | STM0881 | STY0914 | ATGCAAG TTATTGC/ATGCAAG    | 0 |
| 4918 | CHIP3447 | STM specil | STM0903 |         | ATGCACA TTAATAAC/ATGCACA   | 1 |
| 4919 | CHIP3463 | STM specil | STM0920 |         | ATGAAGC TTAGAAA/ATGAAGC    | 1 |
| 4920 | CHIP3103 | STM/STY    | STM2525 | STY2770 | ATGTCTG TTAATA/ATGTCTG     | 1 |
| 4921 | CHIP2357 | STM/STY    | STM1364 | STY1759 | ATGGTAA TTATGAC/ATGGTAA    | 1 |
| 4922 | CHIP2946 | STM/STY    | STM1937 | STY2145 | ATGAAAA TTAACCT/ATGAAAA    | 1 |
| 4923 | CHIP2962 | STM/STY    | STM1994 | STY2202 | ATGGGCC TTAATTC/ATGGGCC    | 1 |
| 4924 | CHIP3658 | STM specil | STM4432 |         | ATGGCGC TTAGTAC/ATGGCGC    | 1 |
| 4925 | CHIP3682 | STM specil | STM4491 |         | ATGCAAA TTAGTTT/ATGCAAA    | 1 |
| 4926 | CHIP3698 | STM/STY    | STM4516 | STY4873 | ATGAATA TTAGATA/ATGAATA    | 1 |
| 4927 | CHIP3692 | STM/STY    | STM4501 | STY4857 | ATGAATT TTAGCGA/ATGAATT    | 1 |
| 4928 | CHIP3036 | STM/STY    | STM2366 | STY2597 | ATGAGCT TTAGGCC/ATGAGCT    | 1 |
| 4929 | CHIP2288 | STM/STY    | STM1228 | STY1268 | ATGTTAC TTATCCA/ATGTTAC    | 1 |

|      |          |            |         |         |                           |   |
|------|----------|------------|---------|---------|---------------------------|---|
| 4930 | CHIP2304 | STM/STY    | STM1336 | STY1775 | ATGGCTC TTATGCC.ATGGCTC   | 1 |
| 4931 | CHIP0245 | STM/STY    | STM2433 | STY2670 | ATGGGTT TTAATTC ATGGGTT   | 1 |
| 4932 | CHIP2344 | STM/STY    | STM1278 | STY1840 | ATGACGA TTATGAC(ATGACGA   | 1 |
| 4933 | CHIP2322 | STM/STY    | STM1077 | STY1099 | ATGAAAA TTAAGAG ATGAAAA   | 1 |
| 4934 | CHIP0263 | STM/STY    | STM2866 | STY2987 | ATGAGAA TTAATTC/ATGAGAA   | 1 |
| 4935 | CHIP0279 | STM/STY    | STM2269 | STY2494 | ATGAGTC TTACAGC.ATGAGTC   | 1 |
| 4936 | CHIP2951 | STM/STY    | STM1946 | STY2154 | ATGAGTG TTAATGT GTGAGTC   | 1 |
| 4937 | CHIP2967 | STM specil | STM2008 |         | ATGAAAT TTAAGGC ATGAAAT   | 1 |
| 4938 | CHIP2983 | STM/STY    | STM2264 | STY2490 | ATGCTGG TTATTCTTATGCTGG   | 1 |
| 4939 | CHIP3913 | STM/STY    | STM1316 | STY1797 | ATGAGCC TTAGTGG ATGAGCC   | 1 |
| 4940 | CHIP3937 | STM specil | STM1359 |         | ATGGATG TTAGGCT ATGGATG   | 1 |
| 4941 | CHIP3961 | STM/STY    | STM1450 |         | ATGAAGA TTACAGC ATGAAGA   | 1 |
| 4942 | CHIP3977 | STM/STY    | STM1481 | STY1587 | ATGGCAA TTATCTTATGGCAA    | 1 |
| 4943 | CHIP0570 | STM/STY    | STM4232 | STY4428 | ATGAAAA TTACCC ATGAAAA    | 1 |
| 4944 | CHIP1421 | STM/STY    | STM3825 | STY3952 | ATGCGCC TTAATTTATGCGCC    | 1 |
| 4945 | CHIP1327 | STM/STY    | STM3804 | STY3975 | ATGCCGC TTATATA/ATGCCGC   | 1 |
| 4946 | CHIP1351 | STM/STY    | STM0216 | STY0239 | ATGGCAA TTAATCG ATGGCAA   | 1 |
| 4947 | CHIP1463 | STM/STY    | STM0372 | STY0404 | ATGACAG TTAACGC.ATGACAG   | 1 |
| 4948 | CHIP1391 | STM/STY    | STM0132 | STY0152 | ATGATCA. TTAATTC ATGATCA. | 1 |
| 4949 | CHIP1503 | STM/STY    | STM2327 | STY2557 | ATGGATT. TTAATTC ATGGATT. | 1 |
| 4950 | CHIP0501 | STM/STY    | STM1721 | STY1329 | ATGCGAG TTAATGT(ATGCGAG   | 1 |
| 4951 | CHIP0503 | STM/STY    | STM3837 | STY3941 | ATGAAAT TTACAGC ATGAAAT   | 1 |
| 4952 | CHIP3950 | STM/STY    | STM1392 | STY1728 | ATGAATT TTAAGTA/ATGAATT   | 1 |
| 4953 | CHIP3974 | STM/STY    | STM1473 |         | ATGAAAA TTAGAAC ATGAAAA   | 1 |
| 4954 | CHIP0567 | STM/STY    | STM0545 | STY0592 | ATGCTGA TTAACCG ATGCTGA   | 1 |
| 4955 | CHIP1426 | STM/STY    | STM3849 | STY3934 | ATGGCGA TTATGAA(ATGGCGA   | 1 |
| 4956 | CHIP1442 | STM/STY    | STM0356 | STY0387 | ATGTACA TTACGTG ATGTACA   | 1 |
| 4957 | CHIP3168 | STM/STY    | STM2644 | STY2837 | ATGGATC TTAACCC ATGGATC   | 1 |
| 4958 | CHIP3192 | STM/STY    | STM3215 | STY3393 | ATGATGC TTAATCC/ATGATGC   | 1 |
| 4959 | CHIP2068 | STM/STY    | STM3524 | STY4279 | ATGTTGA TTAATGT(ATGTTGA   | 1 |
| 4960 | CHIP0962 | STM/STY    | STM4155 |         | ATGCTGG TTATTCA1ATGCTGG   | 1 |
| 4961 | CHIP0978 | STM specil | STM1055 |         | ATGTTAA(TTATAAA/ATGTTAA   | 1 |
| 4962 | CHIP0994 | STM specil | STM2631 |         | ATGAAAA TTAATGG.ATGAAAA   | 0 |
| 4963 | CHIP1575 | STM/STY    | STM0593 | STY0637 | ATGAATC TTAGCCA ATGAATC   | 1 |
| 4964 | CHIP1991 | STM/STY    | STM4381 | STY4737 | ATGACTG TTAACCG ATGACTG   | 1 |
| 4965 | CHIP2007 | STM/STY    | STM4477 | STY4816 | ATGGAGT TTAATCT ATGGAGT   | 1 |
| 4966 | CHIP3171 | STM/STY    | STM2650 | STY2843 | ATGACCA TTATGCT(ATGACCA   | 1 |
| 4967 | CHIP3187 | STM/STY    | STM3202 | STY3381 | ATGGCTC TTATCGT ATGGCTC   | 1 |
| 4968 | CHIP3203 | STM/STY    | STM3243 | STY3426 | ATGAGTA TTAGAAC.ATGAGTA   | 1 |
| 4969 | CHIP3205 | STM/STY    | STM3249 | STY3431 | ATGAATA TTATTTTATGAATA    | 1 |
| 4970 | CHIP1514 | STM/STY    | STM2289 | STY2519 | ATGAACG TTAATAAC ATGAACG  | 1 |
| 4971 | CHIP1538 | STM/STY    | STM2496 | STY2737 | ATGTCAT TTACAGT ATGTCAT   | 1 |
| 4972 | CHIP1562 | STM/STY    | STM0486 | STY0530 | ATGCAAA TTAGAAA.ATGCAAA   | 1 |
| 4973 | CHIP1578 | STM/STY    | STM0472 | STY0515 | ATGAGTG TTACAAT ATGAGTG   | 1 |
| 4974 | CHIP1594 | STM specil | STM0573 |         | ATGGAAA TTAATTTATGGAAA    | 1 |
| 4975 | CHIP1796 | STM/STY    | STM4007 | STY3874 | ATGTCCG TTAACCG ATGTCCG   | 1 |
| 4976 | CHIP1828 | STM/STY    | STM0844 | STY0883 | ATGATCT TTATCCT(ATGATCT   | 1 |
| 4977 | CHIP1868 | STM/STY    | STM0738 | STY0781 | ATGAAC TTAATTT(ATGAAC     | 1 |
| 4978 | CHIP0674 | STM/STY    | STM4006 | STY3875 | ATGGCAA TTAATTT(ATGGCAA   | 1 |
| 4979 | CHIP0690 | STM/STY    | STM2354 | STY2584 | ATGAAAA TTAACCG ATGAAAA   | 1 |
| 4980 | CHIP0706 | STM/STY    | STM0118 | STY0138 | ATGAAAC TTAGCTA GTGAAAC   | 1 |
| 4981 | CHIP1839 | STM/STY    | STM0694 | STY0732 | ATGGCAA TTAGCG ATGGCAA    | 1 |



|      |          |            |         |          |                           |   |
|------|----------|------------|---------|----------|---------------------------|---|
| 4982 | CHIP1871 | STM/STY    | STM0735 | STY0778  | ATGATGA TTATGCG ATGATGA   | 1 |
| 4983 | CHIP0677 | STM/STY    | STM0228 | STY0251  | ATGATTG TTAACGA GTGATTG   | 1 |
| 4984 | CHIP0701 | STM/STY    | STM2674 | STY2861  | ATGTTTA TTATGCC GTGTTTA   | 1 |
| 4985 | CHIP0717 | STM/STY    | STM4361 | STY4718  | ATGGCTA TTATTCA(ATGGCTA   | 1 |
| 4986 | CHIP0733 | STM/STY    | STM1777 | STY1902  | ATGACCC TTA CTCC ATGACCC  | 1 |
| 4987 | CHIP0600 | STM/STY    | STM2500 | STY2741  | ATGAATA TTATTCC ATGAATA   | 1 |
| 4988 | CHIP0720 | STM/STY    | STM0846 | STY0885  | ATGTTCA TTACAGG ATGTTCA   | 1 |
| 4989 | CHIP0744 | STM specil | STM1240 |          | ATGAATA TTACGCT ATGAATA   | 1 |
| 4990 | CHIP1811 | STM/STY    | STM4062 | STY3809  | ATGATTA TTAGTAC ATGATTA   | 1 |
| 4991 | CHIP1843 | STM/STY    | STM0664 | STY0709  | ATGTCAA TTATTTG(ATGTCAA   | 1 |
| 4992 | CHIP1883 | STM/STY    | STM3399 | STY4398  | ATGTCTG TTACGGT ATGTCTG   | 1 |
| 4993 | CHIP4714 | STM/STY    | STM1600 | STY1464  | ATGGCTA TTACCTG ATGGCTA   | 1 |
| 4994 | CHIP4730 | STM/STY    | STM2634 | STY1013  | ATGCGCC TTAGTTT(ATGCGCC   | 0 |
| 4995 | CHIP0187 | STM/STY    | STM2048 | STY2253  | ATGAACG TTA CTCC ATGAACG  | 1 |
| 4996 | CHIP1230 | STM/STY    | STM4286 | STY4485  | ATGTTCC TTAGAGG ATGTTCC   | 1 |
| 4997 | CHIP1246 | STM/STY    | STM1949 | STY2157  | ATGAGTA TTA CTGG ATGAGTA  | 1 |
| 4998 | CHIP0443 | STM/STY    |         |          | ATGGTAG TTAGCGT ATGGTAG   | 0 |
| 4999 | CHIP1272 | STM/STY    | STM3357 | STY3537  | ATGCAGA TTAGGCA GTGCAGA   | 1 |
| 5000 | CHIP1296 | STM/STY    | STM0010 | STY0010  | ATGAACG TTACGCC ATGAACG   | 1 |
| 5001 | CHIP1312 | STM/STY    | STM0003 | STY0003  | ATGGTGA TTATCCC ATGGTGA   | 1 |
| 5002 | CHIP4693 | STM/STY    | STM1331 | STY1779a | ATGGATA TTAGATT ATGGATA   | 1 |
| 5003 | CHIP4709 | STM/STY    | STM1872 | STY2078  | ATGATAA TTA AAA G CTGATAA | 1 |
| 5004 | CHIP3211 | STM/STY    | STM3264 | STY3447  | ATGCATT TTATTAG CATT TTC  | 1 |
| 5005 | CHIP4727 | STM/STY    | STM2475 | STY2712  | ATGAAAA TTA CTTC ATGAAAA  | 1 |
| 5006 | CHIP3456 | STM specil | STM0913 |          | ATGTGCG TTATTATC GTGGCGC  | 1 |
| 5007 | CHIP0392 | STM/STY    | STM2188 | STY2421  | ATGAGTG TTAGGCC ATGAGTG   | 1 |
| 5008 | CHIP0408 | STM/STY    | STM0570 | STY0619  | ATGACCC TTA AAA T ATGACCC | 1 |
| 5009 | CHIP0432 | STM/STY    | STM0191 | STY0218  | ATGGCGC TTAGAAA ATGGCGC   | 1 |
| 5010 | CHIP0448 | STM/STY    |         |          | ATGGTCA TTATCCC ATGGTCA   | 0 |
| 5011 | CHIP0914 | STM/STY    | STM2325 | STY2555  | ATGCACG TTATTTA ATGCACG   | 1 |
| 5012 | CHIP1765 | STM/STY    | STM3007 | STY3150  | ATGAAAA TTA ACGT ATGAAAA  | 1 |
| 5013 | CHIP0003 | STM/STY    | STM3985 | STY3575  | ATGGACA TTATTCT ATGGACA   | 1 |
| 5014 | CHIP0027 | STM/STY    | STM3960 | STY3599  | ATGACCT TTACGCG ATGACCT   | 1 |
| 5015 | CHIP0051 | STM/STY    | STM3935 | STY3624  | ATGCTAA TTA CTGC ATGCTAA  | 1 |
| 5016 | CHIP0091 | STM/STY    | STM4150 | STY3735  | ATGGCTA TTAGTTC ATGGCTA   | 1 |
| 5017 | CHIP0061 | STM/STY    | STM3921 | STY3634  | ATGAGTT TTAGCGC ATGAGTT   | 1 |
| 5018 | CHIP0085 | STM/STY    | STM4137 | STY3742  | ATGACCC TTATGCA ATGACCC   | 1 |
| 5019 | CHIP0869 | STM/STY    | STM1972 | STY2180  | ATGACCA TTACACC ATGACCA   | 1 |
| 5020 | CHIP0885 | STM/STY    | STM2431 | STY2667  | ATGTTCC TTA CTGC ATGTTCC  | 1 |
| 5021 | CHIP0901 | STM/STY    | STM0104 | STY0121  | ATGGCTG TTATTCA(ATGGCTG   | 1 |
| 5022 | CHIP1752 | STM/STY    | STM2952 | STY3081  | ATGTCCA TTACGCC ATGTCCA   | 1 |
| 5023 | CHIP1778 | STM/STY    | STM4084 | STY3786  | ATGGCCG TTACCAG ATGGCCG   | 1 |
| 5024 | CHIP0696 | STM/STY    | STM2076 | STY2285  | ATGATTA TTATACG ATGATTA   | 1 |
| 5025 | CHIP0056 | STM/STY    | STM3926 | STY3629  | ATGTCGC TTATGCT ATGTCGC   | 1 |
| 5026 | CHIP0096 | STM/STY    | STM4166 | STY3719  | ATGGATC TTA ATCA ATGGATC  | 1 |
| 5027 | CHIP0880 | STM/STY    | STM0380 | STY0412  | ATGGCGA TTACATC ATGGCGA   | 1 |
| 5028 | CHIP0896 | STM/STY    | STM1921 | STY2130  | ATGAGCA TTAGGCG GTGAGCA   | 1 |
| 5029 | CHIP2881 | STM/STY    | STM1796 | STY1924  | ATGATAC TTA CTGC ATGATAC  | 1 |
| 5030 | CHIP2801 | STM/STY    | STM1624 | STY1440  | ATGGCGA TTA AAGC ATGGCGA  | 1 |
| 5031 | CHIP2825 | STM/STY    | STM1658 | STY1406  | ATGAACC TTA CCGA ATGAACC  | 1 |
| 5032 | CHIP1126 | STM/STY    | STM0887 | STY0920  | ATGAAAA TTA CTGC ATGAAAA  | 1 |
| 5033 | CHIP1150 | STM/STY    | STM0619 | STY0668  | ATGATGC TTA ATGA ATGATGC  | 1 |

|      |          |            |         |         |             |               |   |
|------|----------|------------|---------|---------|-------------|---------------|---|
| 5034 | CHIP1166 | STM/STY    | STM0990 | STY0992 | ATGCTTT TTA | CTCC(ATGCTTT  | 1 |
| 5035 | CHIP1176 | STM/STY    | STM3766 | STY4020 | ATGAAAA TTA | ATGG(ATGAAAA  | 1 |
| 5036 | CHIP4460 | STM/STY    | STM0602 | STY0646 | ATGAACC TT  | ATATT(ATGAACC | 1 |
| 5037 | CHIP2852 | STM/STY    | STM1719 | STY1331 | ATGAGCG TT  | ATCCG(ATGAGCG | 1 |
| 5038 | CHIP2772 | STM/STY    | STM1570 | STY1492 | ATGACCA TT  | ATGCC(ATGACCA | 1 |
| 5039 | CHIP2892 | STM/STY    | STM1821 | STY1951 | ATGACGG TT  | ACTCG(GTGACGG | 1 |
| 5040 | CHIP2908 | STM/STY    | STM1849 | STY1980 | ATGAGTC TTA | ACGT(ATGAGTC  | 1 |
| 5041 | CHIP2918 | STM specil | STM1870 |         | ATGGAAC TT  | ATGAA(GTGGAAC | 1 |
| 5042 | CHIP2934 | STM/STY    | STM1897 | STY2105 | ATGAAAA TT  | ATTCT(ATGAAAA | 1 |
| 5043 | CHIP4391 | STM/STY    | STM0482 | STY0526 | ATGCAAC TT  | AGCGC(ATGCAAC | 1 |
| 5044 | CHIP4415 | STM/STY    | STM0524 | STY0572 | ATGTTCC TT  | ATTTA(ATGTTCC | 1 |
| 5045 | CHIP4431 | STM/STY    | STM0557 | STY0605 | ATGAGAA TT  | ATTTA(ATGAGAA | 1 |
| 5046 | CHIP1187 | STM/STY    | STM1575 | STY1490 | ATGAGTT TT  | ACGCA(ATGAGTT | 1 |
| 5047 | CHIP4265 | STM specil | STM3118 |         | ATGATGA TTA | AATC(ATGATGA  | 1 |
| 5048 | CHIP4577 | STM/STY    | STM2288 | STY2518 | ATGCCGC TT  | ATGCC(ATGCCGC | 0 |
| 5049 | CHIP4593 | STM/STY    | STM2774 | STY2891 | ATGCCCG TT  | ATCCT(ATGCCCG | 1 |
| 5050 | CHIP2497 | STM/STY    | STM3655 | STY4144 | ATGTCTG TT  | ATTGA(ATGTCTG | 1 |
| 5051 | CHIP4633 | STM/STY    | STM0747 |         | ATGTCAA TT  | ACAGT(ATGTCAA | 1 |
| 5052 | CHIP4657 | STM specil | STM4111 |         | ATGCCGC TT  | ACGTA(CTACGGC | 0 |
| 5053 | CHIP4292 | STM/STY    | STM3175 | STY3352 | ATGATGA TTA | ACGA(GTGATGA  | 1 |
| 5054 | CHIP4220 | STM/STY    | STM3013 | STY3157 | ATGTCAT TT  | AGAGC(ATGTCAT | 1 |
| 5055 | CHIP4244 | STM/STY    | STM3078 | STY3238 | ATGAGCA TT  | ACTCG(ATGAGCA | 1 |
| 5056 | CHIP4364 | STM specil | STM0438 |         | ATGGATA TT  | ATCGA(GTGGATA | 1 |
| 5057 | CHIP4588 | STM/STY    | STM2843 | STY2965 | ATGAACC TT  | AGAAA(ATGAACC | 1 |
| 5058 | CHIP2492 | STM/STY    | STM3643 | STY4159 | ATGATTC TT  | ACGGC(ATGATTC | 1 |
| 5059 | CHIP2542 | STM/STY    | STM3770 | STY4015 | ATGGATA TT  | ATGCT(ATGGATA | 1 |
| 5060 | CHIP4215 | STM/STY    | STM2998 | STY3136 | ATGAATC TT  | AGGGC(GTGAATC | 1 |
| 5061 | CHIP4231 | STM/STY    | STM3030 | STY3178 | ATGAAAA TT  | AATGC(ATGAAAA | 1 |
| 5062 | CHIP4263 | STM/STY    | STM3115 | STY3272 | ATGGTAA TT  | AGGCA(GTGGTAA | 1 |
| 5063 | CHIP4279 | STM/STY    | STM3145 | STY3316 | ATGTCTG TT  | ATGCA(ATGTCTG | 1 |
| 5064 | CHIP4591 | STM/STY    | STM2721 | STY4626 | ATGACAG TT  | AGCAA(ATGACAG | 1 |
| 5065 | CHIP1677 | STM/STY    | STM2163 | STY2393 | ATGATTG TT  | ACACA(ATGATTG | 1 |
| 5066 | CHIP1693 | STM/STY    | STM1819 | STY1949 | ATGGCGC TT  | ACTCT(ATGGCGC | 1 |
| 5067 | CHIP1909 | STM/STY    | STM3428 | STY4370 | ATGGCGA TT  | ACTTG(ATGGCGA | 1 |
| 5068 | CHIP2117 | STM/STY    | STM3550 | STY4261 | ATGAAAG TT  | ATGCC(ATGAAAG | 1 |
| 5069 | CHIP2141 | STM/STY    | STM3296 | STY3474 | ATGGCGA TT  | ATTTG(ATGGCGA | 1 |
| 5070 | CHIP2157 | STM/STY    | STM3208 | STY3387 | ATGCGTG TT  | ACGCC(ATGCGTG | 1 |
| 5071 | CHIP2119 | STM/STY    | STM3548 | STY4263 | ATGAACA TT  | ATTTT(ATGAACA | 1 |
| 5072 | CHIP2135 | STM/STY    | STM3310 | STY3489 | ATGTTTA TT  | ACTGT(ATGTTTA | 1 |
| 5073 | CHIP1967 | STM/STY    | STM4507 | STY4862 | ATGAAAT TT  | AGGCA(ATGAAAT | 1 |
| 5074 | CHIP1983 | STM/STY    | STM4323 | STY4682 | ATGGCTC TT  | ACGGT(ATGGCTC | 1 |
| 5075 | CHIP4492 | STM/STY    | STM0374 | STY0406 | ATGTTAT TT  | AATAT(ATGTTAT | 1 |
| 5076 | CHIP1632 | STM/STY    | STM2143 | STY2372 | ATGAAAG TT  | ATAGT(ATGAAAG | 1 |
| 5077 | CHIP1610 | STM/STY    | STM2836 | STY2957 | ATGGTTT TT  | ATCCA(ATGGTTT | 1 |
| 5078 | CHIP1634 | STM/STY    | STM2155 | STY2384 | ATGCCCT TT  | ATTTT(ATGCCCT | 1 |
| 5079 | CHIP4534 | STM/STY    | STM2221 | STY2458 | ATGACCA TT  | ACCGT(GTGACCA | 1 |
| 5080 | CHIP4550 | STM/STY    | STM2244 | STY2469 | ATGCATC TT  | ATTTA(TTGCATC | 0 |
| 5081 | CHIP4566 | STM/STY    | STM2168 | STY2398 | ATGTTGG TTA | ATCG(ATGTTGG  | 1 |
| 5082 | CHIP1898 | STM/STY    | STM0259 | STY0280 | ATGACAA TT  | ATACC(ATGACAA | 1 |
| 5083 | CHIP0369 | STM/STY    | STM1407 | STY1713 | ATGTTTG TT  | AATTT(ATGTTTG | 1 |
| 5084 | CHIP3336 | STM/STY    | STM0733 | STY0776 | ATGGTAA TT  | ACACA(ATGGTAA | 1 |
| 5085 | CHIP3384 | STM/STY    | STM0810 | STY0845 | ATGAACC TTA | AGCA(ATGAACC  | 1 |

|      |          |            |         |         |                          |   |
|------|----------|------------|---------|---------|--------------------------|---|
| 5086 | CHIP0290 | STM/STY    | STM2678 | STY2865 | ATGCAAC TTAGCTT/ATGCAAC  | 1 |
| 5087 | CHIP2205 | STM/STY    | STM3271 | STY3454 | ATGTCCA TTAATCG GTGTCCA  | 0 |
| 5088 | CHIP2221 | STM/STY    | STM3227 | STY3407 | ATGCTTA TTAGCCA ATGCTTA  | 1 |
| 5089 | CHIP3411 | STM/STY    | STM0851 | STY0890 | ATGCGAT TTACCCC ATGCGAT  | 1 |
| 5090 | CHIP0309 | STM/STY    | STM1385 | STY1736 | ATGTGGA TTAGACC ATGTGGA  | 1 |
| 5091 | CHIP2216 | STM/STY    | STM3233 | STY3413 | ATGGGAC TTAGCCA ATGGGAC  | 1 |
| 5092 | CHIP2240 | STM/STY    | STM3155 | STY3328 | ATGCTTC TTAACTT(ATGCTTC  | 1 |
| 5093 | CHIP2264 | STM/STY    | STM3045 | STY3201 | ATGCAGC TTAGGCG ATGCAGC  | 1 |
| 5094 | CHIP3348 | STM/STY    | STM0760 | STY0801 | ATGAATT TTAGCCG ATGAATT  | 1 |
| 5095 | CHIP0320 | STM/STY    | STM1183 | STY1222 | ATGTCCA TTAGCGA ATGTCCA  | 1 |
| 5096 | CHIP0336 | STM/STY    | STM1915 | STY2124 | ATGATGC TTAAGAG ATGATGC  | 1 |
| 5097 | CHIP2243 | STM/STY    | STM3129 | STY3298 | ATGAGCC TTAATAAC ATGAGCC | 1 |
| 5098 | CHIP0376 | STM/STY    | STM1113 | STY1149 | ATGGCGA TTATTCA(ATGGCGA  | 1 |
| 5099 | CHIP3343 | STM/STY    | STM0749 | STY0795 | ATGCAAC TTAGTAA ATGCAAC  | 1 |
| 5100 | CHIP3375 | STM/STY    | STM0796 | STY0829 | ATGGCGC TTAGTCA(ATGGCGC  | 1 |
| 5101 | CHIP1576 | STM/STY    | STM0599 | STY0643 | ATGATCT TTATCCC ATGATCT  | 1 |
| 5102 | CHIP1530 | STM/STY    | STM2537 | STY2783 | ATGGGAC TTAATCT(ATGGGAC  | 1 |
| 5103 | CHIP1555 | STM/STY    | STM2481 | STY2719 | ATGGCGA TTATTTT(ATGGCGA  | 1 |
| 5104 | CHIP1620 | STM/STY    | STM2826 | STY2947 | ATGCTGA TTAGTAA(ATGCTGA  | 1 |
| 5105 | CHIP3528 | STM specil | STM1037 |         | ATGACCC TTACATG(ATGACCC  | 1 |
| 5106 | CHIP3560 | STM specil | STM4219 |         | ATGCGCA TTACAGC ATGCGCA  | 1 |
| 5107 | CHIP2081 | STM/STY    | STM3741 | STY4051 | ATGGCAC TTAACGA ATGGCAC  | 1 |
| 5108 | CHIP2092 | STM/STY    | STM3686 | STY4110 | ATGAAGG TTATTTG(ATGAAGG  | 1 |
| 5109 | CHIP3574 | STM/STY    | STM4252 | STY4448 | ATGGCGT TTATAGC ATGGCGT  | 1 |
| 5110 | CHIP3551 | STM specil | STM4209 |         | ATGCGCT TTATCTC ATGCGCT  | 1 |
| 5111 | CHIP4025 | STM/STY    | STM2139 | STY2367 | ATGCATG TTATGGC GTGCATG  | 1 |
| 5112 | CHIP4042 | STM specil | STM2733 |         | ATGGCTA TTAATTC(ATGGCTA  | 1 |
| 5113 | CHIP2483 | STM/STY    | STM3621 | STY4179 | ATGTATA TTATGGC ATGTATA  | 1 |
| 5114 | CHIP3748 | STM/STY    | STM0273 | STY0297 | ATGGCTA TTATTCC(ATGGCTA  | 1 |
| 5115 | CHIP3928 | STM specil | STM1350 |         | ATGAGTG TTATACC(ATGAGTG  | 1 |
| 5116 | CHIP1592 | STM/STY    | STM0563 | STY0611 | ATGATGG TTAATGA ATGATGG  | 1 |
| 5117 | CHIP3940 | STM specil | STM1362 |         | ATGATGA TTAACAC ATGATGA  | 1 |
| 5118 | CHIP1170 | STM/STY    | STM1563 | STY1497 | ATGACAA TTAGGCG ATGACAA  | 1 |
| 5119 | CHIP2629 | STM/STY    | STM0044 | STY0053 | ATGCAGC TTAAGAC TTGCAGC  | 1 |
| 5120 | CHIP2574 | STM specil | STM3829 |         | ATGACAG TTAGTTT(ATGACAG  | 1 |
| 5121 | CHIP2567 | STM/STY    | STM3820 | STY3958 | ATGAAAA TTATTGC(ATGAAAA  | 1 |
| 5122 | CHIP2656 | STM/STY    | STM0099 |         | ATGAACG TTAATTA TTGAACG  | 1 |
| 5123 | CHIP4506 | STM specil | STM1794 |         | ATGTGGT TTATTGT ATGTGGT  | 1 |
| 5124 | CHIP3112 | STM/STY    | STM2542 | STY2788 | ATGGCTT TTATTTT(ATGGCTT  | 1 |
| 5125 | CHIP3213 | STM/STY    | STM3266 | STY3449 | ATGCTCG TTAATCA GTGCTCG  | 1 |
| 5126 | CHIP3151 | STM specil | STM2607 |         | ATGGCAA TTACAGT ATGGCAA  | 1 |
| 5127 | CHIP3428 | STM/STY    | STM0875 | STY0908 | ATGAAAA TTAGCCG GTGAAAA  | 1 |
| 5128 | CHIP3477 | STM/STY    | STM0943 | STY0940 | ATGGAAA TTATGCA ATGGAAA  | 1 |
| 5129 | CHIP3511 | STM/STY    | STM1006 | STY1012 | ATGAGCA TTATGTT(ATGAGCA  | 1 |
| 5130 | CHIP3379 | STM/STY    | STM0805 | STY0839 | ATGCGCA TTAGCCC ATGCGCA  | 1 |
| 5131 | CHIP1094 | STM specil | PSLT085 |         | ATGAGCC TTATGCA ATGAGCC  | 1 |
| 5132 | CHIP1055 | STM specil | PSLT021 |         | ATGCCGA TTAGGGC TTGCCGA  | 0 |
| 5133 | CHIP1103 | STM specil | PSLT094 |         | ATGCACA TTATTGC(ATGCACA  | 1 |
| 5134 | CHIP0170 | STM specil | PSLT078 |         | ATGTCGG TTAATTA ATGTCGG  | 1 |
| 5135 | CHIP0420 | STM specil | PSLT016 |         | ATGATGA TTAATTC ATGATGA  | 1 |
| 5136 | CHIP0423 | STM specil | PSLT015 |         | ATGATGA TTAATTC ATGATGA  | 1 |
| 5137 | CHIP4756 | STM specil | PSLT066 |         | ACACCAC TCATCGT ACACCAC  | 1 |

|      |          |              |         |                  |                 |         |   |
|------|----------|--------------|---------|------------------|-----------------|---------|---|
| 5138 | CHIP4760 | STM/STY      |         | GCGATCC GCGGATA  | GCGATCC         | 0       |   |
| 5139 | CHIP4764 | STM/STY      |         | TGCTGGA CCTTTAA  | TGCTGGA         | 0       |   |
| 5140 | CHIP4768 | STM/STY      |         | TGAGTGC CAGACCA  | TGAGTGC         | 0       |   |
| 5141 | CHIP4772 | STM/STY      | STM0252 | ATGAAGG TTTTCGCT | ATGAAGG         | 0       |   |
| 5142 | CHIP4776 | STM specific | STM0292 | GGACTTG TCCCTTA  | GGACTTG         | 1       |   |
| 5143 | CHIP4852 | STM/STY      |         | GCAATGC TTATCTT  | GCAATGC         | 0       |   |
| 5144 | CHIP4856 | STM specific |         | GCGCTGA TTTTCTT  | GCGCTGA         | 0       |   |
| 5145 | CHIP4860 | STM specific |         | ATGACGA CACGCAC  | ATGACGA         | 0       |   |
| 5146 | CHIP4864 | STM specific |         | CAGGTGT CCGACTT  | CAGGTGT         | 0       |   |
| 5147 | CTRL003  | none         |         |                  | human plac      | 0       |   |
| 5148 | CTRL002  | none         |         |                  | LT2 gDNA        | 0       |   |
| 5149 | CHIP5210 | STY specific | STY3343 | ATGAAAA TTATGGA  | ATGAAAA         | 0       |   |
| 5150 | CHIP5226 | STY specific | STY3662 | ATGTTTG TTACAGC  | ATGTTTG         | 0       |   |
| 5151 | CHIP5160 | STY specific | STY2629 | ATGGAAC TTATTTG  | TTGGAAC         | 0       |   |
| 5152 | CHIP5263 | STY specific | STY3844 | ATGGTCA TTACAAG  | ATGGTCA         | 0       |   |
| 5153 | CHIP5006 | STY specific | STY1359 | ATGCCGC TTAGCAC  | ATGCCGC         | 0       |   |
| 5154 | CHIP5022 | STY specific | STY1597 | ATGAACC TTAGTCA  | ATGAACC         | 0       |   |
| 5155 | CHIP5138 | STM/STY      | STY2167 | ATGGCAC TTAACGC  | ATGGCAC         | 0       |   |
| 5156 | CHIP5154 | STY specific | STY2358 | ATGACAT TTAATCA  | ATGACAT         | 0       |   |
| 5157 | CHIP5257 | STY specific |         | ATGGCTT TTAGAGG  | ATGGCTT         | 0       |   |
| 5158 | CHIP5273 | STY specific | STY4039 | ATGACGC TTAATTA  | GTGACGC         | 0       |   |
| 5159 | CHIP5016 | STY specific | STY1591 | ATGAGCC TTAATCT  | ATGAGCC         | 0       |   |
| 5160 | CHIP5032 | STY specific | STY1608 | ATGAAAA TTACAGT  | ATGAAAA         | 0       |   |
| 5161 | CHIP5156 | STY specific | STY2362 | ATGTGCA TTAGTAC  | GTGTGCA         | 0       |   |
| 5162 | CHIP5170 | STY specific | STY2880 | ATGGAGC TTATCTT  | ATGGAGC         | 0       |   |
| 5163 | CHIP5186 | STY specific | STY3068 | ATGATAA TTAATGG  | TTGATAA         | 0       |   |
| 5164 | CHIP4923 | STY specific | STY0301 | ATGCAGA TTATTTA  | ATGCAGA         | 0       |   |
| 5165 | CHIP4939 | STY specific | STY0347 | ATGAGTC TTAGGCT  | GTGAGTC         | 0       |   |
| 5166 | CHIP4955 | STY specific | STY1015 | ATGAGCA TTATGCT  | ATGAGCA         | 0       |   |
| 5167 | CHIP5261 | STY specific | STY3763 | ATGATGA TTAAGCT  | ATGATGA         | 0       |   |
| 5168 | CHIP5276 | STM/STY      | STM3689 | STY4107          | ATGAAAG TTAGAAC | ATGAAAG | 1 |
| 5169 | CHIP5289 | STM/STY      |         | ATGGACC TTACGGT  | ATGGACC         | 0       |   |
| 5170 | CHIP5305 | STY specific | STY4530 | ATGCGTC TTAGGCT  | ATGCGTC         | 0       |   |
| 5171 | CHIP5326 | STY specific | STY4564 | ATGTTCT TTAGGGC  | TTGTTCT         | 0       |   |
| 5172 | CHIP5342 | STY specific | STY4582 | ATGTGTA TTAATTT  | ATGTGTA         | 0       |   |
| 5173 | CHIP5405 | STY specific | STY4706 | ATGCCGC TTATGCG  | ATGCCGC         | 0       |   |
| 5174 | CHIP5346 | STY specific | STY4586 | ATGGCAG TTAATCA  | ATGGCAG         | 0       |   |
| 5175 | CHIP5281 | STM/STY      | STY4162 | ATGAGAT TTAATTT  | ATGAGAT         | 0       |   |
| 5176 | CHIP5294 | STY specific | STY4415 | ATGAATG TTAATTA  | GTGAATG         | 0       |   |
| 5177 | CHIP5310 | STY specific | STY4540 | ATGGGCT TTAGTCG  | ATGGGCT         | 0       |   |
| 5178 | CHIP5406 | STY specific | STY4755 | ATGACCA TTAGTGG  | ATGACCA         | 0       |   |
| 5179 | buffer   | none         |         |                  | buffer          | 0       |   |
| 5180 | empty    | none         |         |                  | empty           | 0       |   |
| 5181 | empty    | none         |         |                  | empty           | 0       |   |
| 5182 | empty    | none         |         |                  | empty           | 0       |   |
| 5183 | empty    | none         |         |                  | empty           | 0       |   |
| 5184 | empty    | none         |         |                  | empty           | 0       |   |

& > 90% sequence identity over the entire amplified fragment - with no other gene meeting either criteria  
 quence identity over the entire amplified fragment; aSTM and aSTY if the respective gene is better repre  
 · 90% sequence identity over the entire amplified fragment; aSTM and aSTY if the respective gene is be  
 R > 90% sequence identity over the entire amplified fragment; aSTM and aSTY if the respective gene is

each genome

| BEST_OVI (1) | GENE_ | BEST_OVI (2) | PRIMA (3) | SECON (4) | SINGLE GENE | Description  | GENE_ST, |
|--------------|-------|--------------|-----------|-----------|-------------|--------------|----------|
| 100          | 1     | 99           | STM1968   |           | fliE        | putative_Fl  | 2056008  |
| 100          | 1     | 100          | STM3172   |           | sufI        | suppressor   | 3334467  |
| 100          | 1     | 100          | STM2021   |           | cboQ        | synthesis_   | 2102023  |
| 100          | 1     | 100          | STM0086   |           | kefC        | CPA2_fam     | 98778    |
| 100          | 1     | 100          | STM0141   |           | guaC        | GMP_redu     | 164053   |
| 100          | 1     | 100          | STM0128   |           | murG        | UDP-N-acc    | 149957   |
| 100          | 1     | 100          | STM0161   |           | kdgT        | 2-keto-3-de  | 190200   |
| 100          | 1     | 100          | STM0183   |           | folK        | 7,8-dihydro  | 213398   |
| 100          | 1     | 100          | STM0215   |           | map         | methionine   | 253052   |
| 100          | 1     | 100          | STM0247   |           | abc         | putative_Al  | 287023   |
| 100          | 0     | 100          | STM1532   |           |             | putative_de  | 1608028  |
| 100          | 1     | 100          | STM0685   |           | nagE        | Sugar_Spe    | 745258   |
| 100          | 1     | 100          | STM0711   |           | ybgI        | putative_cy  | 778048   |
| 100          | 1     | 100          | STM4456   |           | mgtA        | P-type_ATI   | 4699688  |
| 100          | 1     | 100          | STM2032   |           | cbiD        | synthesis_   | 2109684  |
| 100          | 1     | 100          | STM1998   |           | umuD        | error-prone  | 2081163  |
| 100          | 1     | 100          | STM1004   |           | pncB        | nicotinate_  | 1096831  |
| 100          | 1     | 100          | STM3842   |           | yidC        | putative_Pi  | 4046425  |
| 100          | 1     | 100          | STM3867   |           | atpA        | membrane     | 4076434  |
| 100          | 1     | 100          | STM0050   |           |             | putative_ni  | 58946    |
| 100          | 0     | 100          | STM0098   |           |             | putative_se  | 115477   |
| 100          | 1     | 100          | STM3334   |           |             | putative_cy  | 3503078  |
| 100          | 1     | 100          | STM3370   |           | cafA        | RNase_G      | 3539847  |
| 100          | 1     | 100          | STM1098   |           | hpaC        | 4-hydroxyp   | 1185196  |
| 100          | 1     | 100          | STM1130   |           |             | putative_in  | 1219460  |
| 100          | 1     | 100          | STM1168   |           | yceH        | putative_cy  | 1253127  |
| 100          | 1     | 100          | STM3510   |           | yhgH        | putative_ar  | 3668696  |
| 100          | 0     | 60           | STM3532   |           |             | putative_di  | 3697030  |
| 100          | 1     | 100          | STM3571   |           | ftsY        | GTPase_d     | 3738746  |
| 100          | 0     | 59           | STM1188   |           |             | putative_in  | 1273246  |
| 100          | 1     | 100          | STM3515   |           | malT        | transcriptio | 3676900  |
| 100          | 1     | 100          | STM3534   |           | glgP        | glycogen_    | 3698912  |
| 100          | 1     | 100          | STM3573   |           | yhhL        | putative_in  | 3740930  |
| 100          | 1     | 100          | STM4568   |           | deoA        | thymidine_   | 4822334  |
| 100          | 0     | 98           | STM2723   |           |             | Fels-2_pro   | 2865801  |
| 100          | 1     | 100          | STM3556   |           | ugpA        | ABC_supe     | 3725410  |
| 100          | 1     | 100          | STM4547   |           | yjjQ        | putative_tr  | 4806117  |
| 100          | 1     | 100          | STM4588   |           | creB        | response_    | 4844233  |
| 100          | 1     | 100          | STM2738   |           |             | Fels-2_pro   | 2876179  |
| 100          | 0     | 65.686       | STM2755   |           |             | putative_he  | 2893685  |

|     |   |        |          |      |              |         |
|-----|---|--------|----------|------|--------------|---------|
| 100 | 1 | 100    | STM2776  | iroE | putative_hy  | 2922612 |
| 100 | 1 | 100    | STM4103  |      | putative_cy  | 4315517 |
| 100 | 1 | 100    | STM2858  | hypE | putative_hy  | 3002515 |
| 100 | 1 | 100    | STM2927  | surE | survival_pr  | 3068478 |
| 100 | 1 | 100    | STM0882  | ybjF | putative_tR  | 953113  |
| 100 | 0 | 60.396 | STM0904  |      | Fels-1_pro   | 974374  |
| 100 | 1 | 100    | STM2489  | dapA | dihydrodipi  | 2604043 |
| 100 | 0 | 62.264 | STM0898  |      | Fels-1_pro   | 967911  |
| 100 | 0 | 100    | aSTM2479 |      | putative_in  | 1030493 |
| 100 | 0 | 100    | STM0954  |      | putative_re  | 1068134 |
| 100 | 1 | 100    | STM0983  | ycaI | Gifsy-2_pro  | 1119429 |
| 100 | 0 | 62.5   | STM1032  |      | putative_Al  | 4287100 |
| 100 | 1 | 100    | STM4077  | yneA | phosphoen    | 4335253 |
| 100 | 1 | 100    | STM4119  | ppc  | putative_in  | 4558172 |
| 100 | 1 | 100    | STM4310  |      | ABC_supe     | 948385  |
| 100 | 1 | 100    | STM0877  | potF | Fels-1_pro   | 979568  |
| 100 | 0 | 64.356 | STM0910  |      | putative_pr  | 2656256 |
| 100 | 1 | 100    | STM2523  | gcpE | putative_pe  | 2690310 |
| 100 | 1 | 100    | STM2552  |      | paral_putat  | 1042190 |
| 100 | 1 | 100    | STM0962  | ycaJ | putative_tr  | 2720726 |
| 100 | 1 | 100    | STM2575  |      | DNA_cytos    | 2074329 |
| 100 | 1 | 100    | STM1992  | dcm  | response_I   | 2369994 |
| 100 | 1 | 100    | STM2270  | rbsB | putative_in  | 4767736 |
| 100 | 1 | 100    | STM4514  | yjiH | 4-hydroxyp   | 1195422 |
| 100 | 1 | 100    | STM1108  | hpaA | putative_N'  | 2458408 |
| 100 | 1 | 100    | STM2346  |      | sigma_F_(:   | 2044747 |
| 100 | 1 | 100    | STM1956  | fliA | putative_fir | 230657  |
| 100 | 0 | 67     | STM0195  | stfA | putative_M   | 1251062 |
| 100 | 1 | 100    | STM1166  | yceL | putative_Ni  | 1450542 |
| 100 | 1 | 100    | STM1368  |      | putative_gl  | 4618366 |
| 100 | 1 | 100    | STM4376  | yjfC | Salmonella   | 3007282 |
| 100 | 1 | 100    | STM2862  | sitB | glutathionir | 1525740 |
| 100 | 1 | 100    | STM1451  | gst  | putative_cy  | 2071620 |
| 100 | 1 | 100    | STM1988  |      | putative_Al  | 2145827 |
| 100 | 1 | 100    | STM2068  | yeeF |              |         |
| 100 | 0 | 100    | aSTM2293 |      | NADH_der     | 2439055 |
| 100 | 1 | 100    | STM2328  | nuoA | putative_cy  | 4683942 |
| 100 | 1 | 100    | STM4440  |      | putative_in  | 4731314 |
| 100 | 0 | 57.547 | STM4488  |      | putative_di  | 4760028 |
| 100 | 1 | 100    | STM4506  | pdxB | erythronate  | 2482355 |
| 100 | 1 | 100    | STM2370  |      | putative_Al  | 1341721 |
| 100 | 1 | 100    | STM1257  |      | pyridine_nu  | 1555695 |
| 100 | 1 | 100    | STM1479  | pntA | aminoacyl-   | 360973  |
| 100 | 1 | 100    | STM0316  | pepD | putative_tr  | 193404  |
| 100 | 1 | 100    | STM0164  |      | 2,3,4,5-tetr | 249289  |
| 100 | 1 | 100    | STM0213  | dapD | D-alanine-l  | 152611  |
| 100 | 1 | 100    | STM0130  | ddlB | succinylorn  | 1382194 |
| 100 | 1 | 100    | STM1303  | astC | phenylalan   | 1416677 |
| 100 | 1 | 100    | STM1338  | pheT | putative_el  | 1434509 |
| 100 | 0 | 73.267 | STM1354  | ydiQ | bifunctiona  | 2240261 |
| 100 | 1 | 100    | STM2146  | thiD | sensory_hi   | 1546405 |
| 100 | 1 | 100    | STM1471  | rstB |              |         |

|     |   |        |         |                   |               |         |
|-----|---|--------|---------|-------------------|---------------|---------|
| 100 | 1 | 100    | STM1418 | ssaQ              | Secretion_    | 1497708 |
| 100 | 1 | 100    | STM3863 |                   | putative_pe   | 4072743 |
| 100 | 1 | 100    | STM0281 |                   | putative_cy   | 319771  |
| 100 | 1 | 100    | STM0219 | frr               | ribosome_I    | 257148  |
| 100 | 1 | 100    | STM1982 | rcaA              | positive_tra  | 2067427 |
| 100 | 1 | 100    | STM2402 | yfdZ              | putative_ar   | 2516005 |
| 100 | 1 | 100    | STM2317 | nuoM              | NADH_def      | 2425818 |
| 100 | 1 | 100    | STM1349 | pps               | phosphoen     | 1427770 |
| 100 | 1 | 100    | STM2871 | prgK              | cell_invasic  | 3014996 |
| 100 | 1 | 100    | STM2443 | cysU              | ABC_supe      | 2554592 |
| 100 | 1 | 100    | STM0503 | ybbM              | putative_YI   | 563150  |
| 100 | 1 | 100    | STM4003 | yihI              | putative_cy   | 4210467 |
| 100 | 1 | 100    | STM4348 | psd               | phosphatid    | 4592578 |
| 100 | 0 | 65.347 | STM2609 |                   | Gifsy-1_prc   | 2757539 |
| 100 | 1 | 100    | STM3184 | yqiB              | putative_cy   | 3347315 |
| 100 | 1 | 100    | STM3555 | ugpE              | ABC_supe      | 3724568 |
| 100 | 1 | 100    | STM3290 | argG              | argininosuc   | 3458857 |
| 100 | 1 | 100    | STM2349 | yfcG              | putative_gl   | 2460413 |
| 100 | 1 | 100    | STM0512 | sfbC              | putative_bi   | 572988  |
| 100 | 1 | 100    | STM4396 | ytfB              | putative_ce   | 4633077 |
| 100 | 1 | 100    | STM4481 | idnR              | L-idonate_I   | 4724731 |
| 100 | 1 | 100    | STM2793 | gabP              | APC_famil     | 2943010 |
| 100 | 1 | 100    | STM4511 | yjiE              | putative_tra  | 4765066 |
| 100 | 1 | 100    | STM4594 | sthA              | putative_fir  | 4852095 |
| 100 | 1 | 99     | STM3657 |                   | putative_ot   | 3842899 |
| 100 | 0 | 100    | STM3252 | agaR              | aga_opero     | 3421438 |
| 100 | 0 | 55.556 | STM3278 |                   | putative_cy   | 3444196 |
| 100 | 1 | 100    | STM4106 | katG              | catalase;_h   | 4319583 |
| 100 | 1 | 100    | STM1824 | pabB              | p-aminobe     | 1921169 |
| 100 | 1 | 100    | STM0548 | fimF              | putative_fir  | 609692  |
| 100 | 1 | 100    | STM4027 | rbcN              | tRNA_proc     | 4237342 |
| 100 | 1 | 100    | STM0630 | crcB              | high-copy_    | 693182  |
| 100 | 1 | 100    | STM3407 | fmt               | 10-formylte   | 3577461 |
| 100 | 1 | 99     | STM1244 | pagD              | PhoP_regu     | 1331176 |
| 100 | 1 | 100    | STM4127 | yjiC              | putative_tra  | 4345579 |
| 100 | 1 | 100    | STM0690 | citB              | citrate_utili | 752726  |
| 100 | 1 | 100    | STM0732 | sdhC              | succinate_I   | 797992  |
| 100 | 1 | 100    | STM0977 | serC              | 3-phospho     | 1061475 |
| 100 | 1 | 99     | STM0584 | entD              | enterocheli   | 640808  |
| 100 | 1 | 100    | STM3475 | nirD              | nitrite_redu  | 3626055 |
| 100 | 1 | 97     | STM4163 | thiE              | thiamin_ph    | 4379856 |
| 100 | 1 | 100    | STM3564 | livK              | ABC_supe      | 3732393 |
| 100 | 0 | 97     | STM2778 | aSTM2779          | pseudogen     | 2926094 |
| 100 | 1 | 100    | STM1623 |                   | putative_ca   | 1711702 |
| 100 | 1 | 100    | STM1172 | flgM              | anti-FliA_(ε  | 1257046 |
| 100 | 1 | 100    | STM3376 | yhdH              | putative_o    | 3547011 |
| 100 | 1 | 100    | STM0033 |                   | putative_5'   | 37103   |
| 100 | 1 | 99     | STM0083 |                   | putative_in   | 95271   |
| 100 | 0 | 100    | STM1250 |                   | putative_cy   | 1335092 |
| 100 | 1 | 100    | STM4021 | yihS              | putative_is   | 4231606 |
| 100 | 0 | 100    | STM3352 | aSTM0055;_aSTM076 | putative_sc   | 3520046 |
| 100 | 1 | 100    | STM0023 | bcfC              | fimbrial_us   | 25803   |

|     |   |                |              |              |         |
|-----|---|----------------|--------------|--------------|---------|
| 100 | 1 | 100 STM2043    | pduG         | Propanedic   | 2120853 |
| 100 | 1 | 100 STM4300    | fumB         | fumarase_    | 4545365 |
| 100 | 0 | 100            | STM1929 otsB | trehalose-6  | 2024696 |
| 100 | 1 | 100 STM2502    | ppx          | exopolyphc   | 2617008 |
| 100 | 1 | 100 STM4263    | yjcB         | putative_in  | 4501537 |
| 100 | 1 | 100 STM2671    | yfiR         | putative_pe  | 2812985 |
| 100 | 1 | 100 STM0062    | citX2        | putative_cy  | 72400   |
| 100 | 1 | 100 STM3798    | emrD         | MFS_famil    | 3999689 |
| 100 | 1 | 100 STM3970    | ubiE         | S-adenosyl   | 4177291 |
| 100 | 1 | 100 STM3954    | yigG         | putative_in  | 4159570 |
| 100 | 1 | 100 STM2086    | rfbU         | LPS_side_    | 2166238 |
| 100 | 1 | 100 STM2393    | yfdC         | putative_tr  | 2504807 |
| 100 | 1 | 100 STM1816    | minE         | cell_divisio | 1913634 |
| 100 | 1 | 100 STM1736    | yciA         | putative_Ar  | 1830799 |
| 100 | 1 | 100 STM2982    | gcvA         | regulator_c  | 3134272 |
| 100 | 1 | 100 STM2914    |              | putative_nu  | 3057042 |
| 100 | 1 | 100 STM4097    |              | putative_ot  | 4306021 |
| 100 | 1 | 100 STM0578    | nfnB         | dihydropter  | 637028  |
| 100 | 1 | 100 STM4091    | hslU         | ATPase_α     | 4299150 |
| 100 | 1 | 99 STM2053     | pduS         | Propanedic   | 2128736 |
| 100 | 1 | 100 STM3957    | pldA         | outer_merr   | 4161623 |
| 100 | 1 | 100 STM3928    | wecF         | TDP-Fuc4I    | 4137118 |
| 100 | 1 | 100 STM1263    |              | putative_pe  | 1345840 |
| 100 | 1 | 100 STM3027    | stdC         | putative_fir | 3187727 |
| 100 | 1 | 100 STM2963    |              | putative_M   | 3115076 |
| 100 | 1 | 100 STM0430    | phnR         | 2-aminoeth   | 483349  |
| 100 | 1 | 100 STM3974    | tatB         | component    | 4180762 |
| 100 | 1 | 100 STM0516    | allR         | putative_re  | 576564  |
| 100 | 0 | 72 STM0574     |              | putative_tr  | 634316  |
| 100 | 1 | 100 STM0564    |              | putative_o   | 620328  |
| 100 | 1 | 100 STM0600    | cstA         | carbon_sta   | 661274  |
| 100 | 1 | 100 STM1614    |              | putative_P   | 1703205 |
| 100 | 0 | 100 STM1556    |              | putative_N   | 1633281 |
| 100 | 1 | 100 STM1598    | ydcR         | putative_re  | 1688394 |
| 100 | 1 | 100 STM1633    |              | putative_pe  | 1723891 |
| 100 | 1 | 100 STM1635    |              | putative_Al  | 1725331 |
| 100 | 1 | 100 STM1894    | ruvB         | Holliday_ju  | 1989054 |
| 100 | 1 | 100 STM0492    | ybaL         | putative_C   | 550350  |
| 100 | 1 | 100 STM0627    | dcuC         | DcuC_fami    | 690391  |
| 100 | 1 | 100 STM3769    |              | putative_pt  | 3969657 |
| 100 | 1 | 100 STM0603    | ybdL         | putative_ar  | 664891  |
| 100 | 1 | 100 STM0596    | entE         | 2,3-dihydr   | 657440  |
| 100 | 1 | 100 STM2739    |              | Fels-2_pro   | 2876815 |
| 100 | 1 | 100 STM1750    | tdk          | thymidine_   | 1846003 |
| 100 | 1 | 100 STM1595    | srfC         | ssrAB_acti   | 1684073 |
| 100 | 1 | 100 STM1641    | hrpA         | helicase,_/  | 1731334 |
| 100 | 1 | 100 STM1668    |              | putative_ot  | 1760349 |
| 100 | 1 | 100 STM4390    |              | putative_cy  | 4630237 |
| 100 | 1 | 100 STM2660    | clpB         | ATP-deper    | 2802116 |
| 100 | 1 | 100 STM3024    | yohM         | putative_in  | 3184177 |
| 100 | 1 | 100 STM0381    |              | putative_in  | 434715  |
| 100 | 0 | 61.905 STM3119 |              | putative_m   | 3278175 |



|     |   |        |         |      |               |         |
|-----|---|--------|---------|------|---------------|---------|
| 100 | 1 | 100    | STM0459 | ybaO | putative_tr   | 516267  |
| 100 | 1 | 100    | STM3096 | yqgE | putative_tr   | 3258102 |
| 100 | 1 | 100    | STM3692 | ltdP | LctP_trans    | 3885912 |
| 100 | 1 | 100    | STM3807 | yidE | paral_putat   | 4007527 |
| 100 | 1 | 100    | STM2993 | recD | exonucleas    | 3144276 |
| 100 | 1 | 100    | STM3028 | stdB | putative_ot   | 3188511 |
| 100 | 1 | 100    | STM0402 |      | putative_th   | 458073  |
| 100 | 1 | 100    | STM3611 | yhjH | putative_Di   | 3786584 |
| 100 | 1 | 100    | STM3651 |      | putative_ac   | 3837736 |
| 100 | 1 | 100    | STM3682 | selB | selenocyst    | 3870846 |
| 100 | 1 | 100    | STM3729 | radC | putative_Di   | 3922680 |
| 100 | 1 | 100    | STM3771 |      | putative_pt   | 3971409 |
| 100 | 1 | 100    | STM0704 | kdpC | P-type_ATI    | 769694  |
| 100 | 1 | 100    | STM4564 | yjjV | putative_hy   | 4817980 |
| 100 | 1 | 100    | STM2813 | emrR | transcriptio  | 2961121 |
| 100 | 1 | 100    | STM2130 | baeS | sensory_ki    | 2223137 |
| 100 | 1 | 100    | STM2216 | yejA | putative_Al   | 2316219 |
| 100 | 1 | 100    | STM2100 | wcaL | putative_gl   | 2181442 |
| 100 | 1 | 100    | STM2165 | yehZ | putative_Al   | 2260075 |
| 100 | 1 | 100    | STM2197 |      | putative_pt   | 2294265 |
| 100 | 0 | 62.136 | STM2230 |      | putative_pe   | 2330961 |
| 100 | 1 | 100    | STM2177 |      | putative_flt  | 2273632 |
| 100 | 1 | 100    | STM0933 | ybjT | putative_nt   | 1007623 |
| 100 | 1 | 100    | STM3642 | tag  | 3-methyl-ac   | 3829352 |
| 100 | 1 | 100    | STM3547 |      | putative_tr   | 3716370 |
| 100 | 1 | 100    | STM3669 | yiaL | putative_cy   | 3856649 |
| 100 | 1 | 100    | STM3580 |      | putative_in   | 3747662 |
| 100 | 1 | 100    | STM3339 | nanA | N-acetyln     | 3508119 |
| 100 | 1 | 100    | STM3238 | yhaN | putative_in   | 3402015 |
| 100 | 1 | 100    | STM3141 |      | molybdenu     | 3305364 |
| 100 | 1 | 100    | STM2852 | hycB | hydrogena     | 2998373 |
| 100 | 1 | 100    | STM3203 | ygiM | putative_Sl   | 3368544 |
| 100 | 1 | 100    | STM1401 | sseD | Secretion_    | 1486467 |
| 100 | 1 | 100    | STM1115 | scsC | Suppressic    | 1202448 |
| 100 | 0 | 60.784 | STM0765 |      | putative_ca   | 828571  |
| 100 | 1 | 100    | STM0835 |      | putative_M    | 902271  |
| 100 | 1 | 100    | STM1387 | ttrR | Tetrathiona   | 1473102 |
| 100 | 1 | 100    | STM0772 | gpmA | phosphogly    | 836363  |
| 100 | 1 | 100    | STM0816 | ybhS | putative_Al   | 880835  |
| 100 | 0 | 100    | STM0861 | ylil | putative_de   | 933950  |
| 100 | 1 | 100    | STM3316 | yrbl | putative_pr   | 3481969 |
| 100 | 1 | 100    | STM1973 | fliJ | flagellar_fli | 2061301 |
| 100 | 1 | 100    | STM3140 | yghU | putative_gl   | 3304430 |
| 100 | 0 | 99     | STM0809 |      | putative_in   | 874971  |
| 100 | 0 | 60.784 | STM0856 |      | putative_el   | 927479  |
| 100 | 0 | 68.317 | STM4421 |      | putative_N.   | 4663940 |
| 100 | 1 | 100    | STM4441 |      | putative_cy   | 4684291 |
| 100 | 1 | 100    | STM0436 | yajR | putative_M    | 488355  |
| 100 | 0 | 62.136 | STM4422 |      | putative_cy   | 4665461 |
| 100 | 1 | 100    | STM0601 | ybdD | putative_cy   | 663443  |
| 100 | 0 | 100    | STM0521 | ybbV | putative_cy   | 582405  |
| 100 | 0 | 100    | STM0556 |      | putative_tr   | 614199  |

|        |   |        |          |          |             |         |
|--------|---|--------|----------|----------|-------------|---------|
| 100    | 1 | 100    | STM0581  |          | putative_re | 639016  |
| 100    | 1 | 100    | STM0582  | ybdJ     | putative_in | 639363  |
| 100    | 1 | 100    | STM1787  |          | hydrogena   | 1885943 |
| 100    | 0 | 61.905 | STM0334  |          | putative_cy | 377573  |
| 100    | 0 | 57.009 | STM2507  |          | putative_in | 2621481 |
| 100    | 1 | 100    | STM2279  | yfaE     | putative_fe | 2384928 |
| 100    | 1 | 100    | STM3151  | yghW     | putative_cy | 3313952 |
| 100    | 1 | 100    | STM0885  |          | putative_in | 955899  |
| 100    | 1 | 100    | STM0614  | ybdQ     | putative_Ul | 677372  |
| 100    | 1 | 100    | STM3778  |          | putative_he | 3979137 |
| 100    | 1 | 100    | STM3708  | tdh      | threonine_; | 3902882 |
| 100    | 1 | 100    | STM3779  |          | putative_pt | 3979551 |
| 100    | 1 | 100    | STM3808  | ibpB     | small_heat  | 4009378 |
| 100    | 1 | 100    | STM3810  | yidQ     | putative_ot | 4010636 |
| 100    | 0 | 60.377 | STM3517  |          | putative_Dl | 3679971 |
| 100    | 0 | 100    | STM1120  | ycdF     | pseudogen   | 1206167 |
| 100    | 1 | 99     | STM4070  |          | putative_cy | 4280021 |
| 100    | 0 | 100    | STM4124  | oxyS     | stable_RN/  | 4342881 |
| 100    | 1 | 100    | STM4520  |          | putative_cy | 4775923 |
| 100    | 0 | 100    | STM0467  | ffs      | signal_recc | 524424  |
| 100    | 1 | 99     | STM1464  | malY     | pseudogen   | 1538720 |
| 100    | 1 | 100    | STM0823  | ybiJ     | putative_pe | 890462  |
| 100    | 1 | 100    | STM0649  |          | putative_hy | 711944  |
| 100    | 1 | 100    | STM1934  |          | putative_ot | 2028816 |
| 100    | 1 | 100    | STM2350  | yfcH     | putative_st | 2461186 |
| 100    | 0 | 61     | PSLT045  | rlgA     | putative_re | P36761  |
| 100    | 0 | 62.264 | PSLT049  | aPSLT050 | putative_Dl | P40871  |
| 100    | 0 | 60.377 | PSLT076  | traY     | conjugative | P62274  |
| 100    | 0 | 63.107 | PSLT030  |          | putative_cy | P20910  |
| 100    | 0 | 66     | PSLT047  |          | putative_cy | P38923  |
| 100    | 0 | 63.303 | PSLT060  |          | putative_cy | P50166  |
| 100    | 0 | 67     |          | PSLT020  | hypothetic  | P15561  |
| 63.725 | 0 | 65.094 |          | tral     |             | R14810  |
| 100    | 0 | 71     | aSTM0326 |          |             |         |
| 100    | 1 | 100    | STM2293  |          | putative_nt | 2400465 |
| 100    | 0 | 100    | aSTM2354 |          |             |         |
| 100    | 0 | 100    | aSTM2421 |          |             |         |
| 100    | 0 | 100    | aSTM2474 |          |             |         |
| 100    | 0 | 100    | aSTM2481 |          |             |         |
| 100    | 0 | 100    | aSTM0066 |          |             |         |
| 55.446 | 1 | 100    |          |          |             |         |
| 57     | 1 | 100    |          |          |             |         |
| 57.843 | 1 | 100    |          |          |             |         |
| 61.165 | 1 | 100    |          |          |             |         |
| 63.366 | 1 | 100    |          |          |             |         |
| 100    | 0 | 100    |          | aSTM0296 |             |         |
| 100    | 1 | 100    |          | aSTM0747 |             |         |
| 100    | 0 | 100    | aSTM1019 | aSTM2621 |             |         |
| 65.347 | 1 | 100    |          |          |             |         |
| 64     | 1 | 100    |          |          |             |         |
| 60.784 | 1 | 100    |          |          |             |         |
| 100    | 1 | 100    | aSTM0437 |          |             |         |

|        |   |                |
|--------|---|----------------|
| 61     | 1 | 100            |
| 61     | 0 | 100            |
| 61.765 | 1 | 100            |
| 66     | 1 | 100            |
| 62.376 | 1 | 100            |
| 61.165 | 1 | 100            |
| 62.136 | 0 | 100            |
| 62.037 | 1 | 100            |
| 59.804 | 1 | 100            |
| 63.636 | 1 | 100            |
| 58.252 | 1 | 100            |
| 64.078 | 1 | 100            |
| 100    | 0 | 100 aSTM2710   |
| 78.431 | 1 | 100            |
| 63.462 | 1 | 100            |
| 64.151 | 1 | 100            |
| 93     | 1 | 100            |
| 56.436 | 1 | 100            |
| 61.165 | 1 | 100            |
| 80     | 1 | 100            |
| 87     | 1 | 100            |
| 56     | 1 | 100            |
| 54.808 | 1 | 100            |
| 100    | 1 | 100 STM3811    |
| 100    | 1 | 100 STM3831    |
| 100    | 1 | 100 STM3854    |
| 100    | 1 | 100 STM3790    |
| 100    | 1 | 100 STM3302    |
| 100    | 0 | 100 STM3337    |
| 100    | 1 | 100 STM3318    |
| 100    | 1 | 100 STM3356    |
| 100    | 0 | 65.741 STM3389 |
| 100    | 1 | 100 STM0651    |
| 100    | 1 | 100 STM0683    |
| 100    | 0 | 100 STM0705    |
| 100    | 1 | 100 STM1517    |
| 100    | 0 | 75 STM3638     |
| 100    | 1 | 100 STM3840    |
| 100    | 0 | 100 STM3859    |
| 100    | 1 | 100 STM0011    |
| 100    | 1 | 100 STM1246    |
| 100    | 1 | 100 STM2640    |
| 100    | 1 | 100 STM3885    |
| 100    | 1 | 100 STM0068    |
| 100    | 1 | 100 STM0122    |
| 100    | 1 | 100 STM0157    |
| 100    | 1 | 100 STM3386    |
| 100    | 1 | 100 STM1491    |
| 100    | 1 | 100 STM3449    |
| 100    | 1 | 100 STM1201    |
| 100    | 1 | 100 STM1229    |
| 100    | 1 | 100 STM1274    |

|      |              |         |
|------|--------------|---------|
| yidR | putative_cy  | 4010973 |
| yidA | putative_hy  | 4034205 |
| pstB | ABC_supe     | 4060740 |
| uhpA | response_I   | 3990554 |
| yhbE | pseudogen    | 3471407 |
| nanE | putative_M   | 3505777 |
| yhbN | putative_Al  | 3483076 |
|      | putative_ca  | 3523796 |
| envR | transcriptio | 3560028 |
|      | putative_pe  | 713524  |
| nagA | N-acetylglu  | 742917  |
| kdpB | P-type_ATI   | 770287  |
| ydeD | putative_pe  | 1595829 |
| lpfC | long_polar_  | 3824115 |
| rnpA | RNase_P,_    | 4045842 |
|      | putative_sh  | 4066214 |
| yaal | putative_pe  | 10841   |
| pagC | PhoP_regu    | 1332251 |
| rpoE | sigma_E_(    | 2779428 |
| rbsK | ribokinase_  | 4095611 |
| caiF | transcriptio | 80548   |
| ftsI | division_sp  | 141726  |
| yach | putative_ou  | 183846  |
| yhdJ | putative_m   | 3556644 |
|      | ABC-type_    | 1568523 |
| yheL | putative_ou  | 3602835 |
| holB | DNA_polyn    | 1284262 |
| ycfD | putative_cy  | 1316024 |
| yeaQ | putative_in  | 1353139 |

|     |   |        |          |          |              |         |
|-----|---|--------|----------|----------|--------------|---------|
| 100 | 1 | 100    | STM2102  | wzxC     | putative_e   | 2183961 |
| 100 | 1 | 100    | STM3488  | hofQ     | putative_tr  | 3643213 |
| 100 | 1 | 100    | STM1235  | ymfB     | putative_M   | 1322749 |
| 100 | 1 | 99     | STM1276  |          | putative_pe  | 1354140 |
| 100 | 1 | 100    | STM2105  | manC     | mannose-1    | 2188501 |
| 100 | 1 | 100    | STM2134  |          | putative_in  | 2226730 |
| 100 | 0 | 64.151 | STM2745  |          | putative_in  | 2883501 |
| 100 | 1 | 100    | STM1290  | gapA     | glyceralde   | 1368693 |
| 100 | 1 | 100    | STM2123  | yegE     | putative_P   | 2208530 |
| 100 | 1 | 100    | STM0008  | mog      | putative_m   | 8729    |
| 100 | 1 | 100    | STM0287  |          | putative_pe  | 328515  |
| 100 | 1 | 100    | STM0314  |          | pseudogen    | 359074  |
| 100 | 0 | 64.423 | STM1047  | aSTM1046 | Gifsy-2_pr   | 1132016 |
| 100 | 0 | 66     | STM4114  | pfID     | putative_py  | 4328814 |
| 100 | 0 | 100    | STM4281  | nrfE     | formate-de   | 4519832 |
| 100 | 0 | 69.307 | STM2939  | ygcH     | putative_cy  | 3079454 |
| 100 | 1 | 100    | STM2404  |          | putative_cf  | 2519133 |
| 100 | 1 | 100    | STM2448  | yfeZ     | putative_in  | 2559259 |
| 100 | 0 | 66     | STM0929  |          | putative_in  | 1003900 |
| 100 | 0 | 70     | STM0906  |          | Fels-1_pro   | 976812  |
| 100 | 0 | 63.551 | aSTM0923 | aSTM0922 |              |         |
| 100 | 1 | 100    | STM2530  |          | putative_ar  | 2662913 |
| 100 | 1 | 100    | STM2563  | yfhG     | putative_tr  | 2705408 |
| 100 | 1 | 100    | STM4030  |          | putative_cy  | 4239649 |
| 100 | 0 | 81     | STM4205  |          | putative_pf  | 4425993 |
| 100 | 1 | 100    | STM2854  | hypA     | guanine-nu   | 2999798 |
| 100 | 1 | 100    | STM2935  | cysD     | ATP-sulfur   | 3074391 |
| 100 | 0 | 81     | STM0893  |          | Fels-1_pro   | 962612  |
| 100 | 1 | 100    | STM2473  | talA     | transaldola  | 2582530 |
| 100 | 1 | 100    | STM0958  | trxB     | thioredoxin  | 1035228 |
| 100 | 1 | 100    | STM0988  | kdsB     | CTP:CMF-     | 1074664 |
| 100 | 1 | 100    | STM0975  | ycaO     | putative_cy  | 1058700 |
| 100 | 0 | 58.095 | STM2591  | aSTM2590 | Gifsy-1_pr   | 2741401 |
| 100 | 1 | 100    | STM4406  | ytfK     | putative_cy  | 4643319 |
| 100 | 1 | 100    | STM2283  | glpT     | MFS_famil    | 2388605 |
| 100 | 1 | 100    | STM2343  |          | putative_cy  | 2456334 |
| 100 | 1 | 100    | STM1923  | motA     | proton_cor   | 2020124 |
| 100 | 1 | 100    | STM2364  | dedD     | paral_putat  | 2476690 |
| 100 | 1 | 100    | STM1219  | ycfW     | ABC_trans    | 1304572 |
| 100 | 1 | 100    | STM1426  | ribE     | riboflavin_s | 1503552 |
| 100 | 0 | 100    | STM1237  | ymfC     | putative_rit | 1323548 |
| 100 | 1 | 100    | STM0025  | bcfE     | fimbrial_su  | 29433   |
| 100 | 1 | 100    | STM1986  | yedP     | putative_hy  | 2068949 |
| 100 | 1 | 100    | STM1325  | ydiZ     | putative_cy  | 1404703 |
| 100 | 1 | 100    | STM4368  | vacB     | putativea_ε  | 4611064 |
| 100 | 1 | 100    | STM4401  | ytfG     | paral_putat  | 4638180 |
| 100 | 0 | 62     | STM4426  | srfJ     | activated_k  | 4669016 |
| 100 | 0 | 69.307 | STM4485  | idnK     | D-gluconat   | 4729211 |
| 100 | 1 | 100    | STM4502  |          | putative_cy  | 4756323 |
| 100 | 1 | 100    | STM2281  |          | putative_tr  | 2386536 |
| 100 | 0 | 66.667 | STM2315  | yfbK     | putative_vc  | 2421685 |
| 100 | 1 | 100    | STM2342  |          | putative_in  | 2454922 |

|     |   |        |          |          |      |              |         |
|-----|---|--------|----------|----------|------|--------------|---------|
| 100 | 1 | 100    | STM1924  |          | flhC | regulator_c  | 2021136 |
| 100 | 1 | 100    | STM2701  |          |      | Fels-2_pro   | 2850109 |
| 100 | 1 | 100    | STM2467  |          | eutT | putative_cc  | 2576556 |
| 100 | 1 | 100    | STM2654  |          | kgtP | MFS_famil    | 2794375 |
| 100 | 1 | 100    | STM0361  |          |      | cytochrome   | 410166  |
| 100 | 1 | 100    | STM2017  |          | cobS | cobalamin_   | 2098400 |
| 100 | 1 | 100    | STM4220  |          | lysC | aspartokin   | 4438468 |
| 100 | 1 | 100    | STM2818  |          | gshA | gamma-glu    | 2966935 |
| 100 | 0 | 73     | STM1352  |          | ydiS | flavoproteir | 1432209 |
| 100 | 1 | 100    | STM1979  |          | fliP | flagellar_bi | 2065326 |
| 100 | 1 | 100    | STM2874  |          | prgH | cell_invasic | 3016342 |
| 100 | 1 | 100    | STM1913  |          | flhA | flagellar_bi | 2008212 |
| 100 | 1 | 100    | STM2093  |          | rfbl | LPS_side_    | 2174120 |
| 100 | 1 | 100    | STM3881  |          | rbsD | D-ribose_h   | 4091659 |
| 100 | 1 | 100    | STM0217  |          | tsf  | protein_cha  | 255280  |
| 100 | 1 | 100    | STM0384  |          | psiF | induced_by   | 437717  |
| 100 | 1 | 100    | STM4193  |          | yjbC | putative_ps  | 4415479 |
| 100 | 1 | 100    | STM0074  |          | caiT | putative_BI  | 86686   |
| 100 | 1 | 100    | STM1309  |          |      | putative_nt  | 1389117 |
| 100 | 0 | 65.714 | STM1357  |          | ydiF | putative_ac  | 1437868 |
| 100 | 1 | 100    | STM1463  |          | add  | adenosine_   | 1537496 |
| 100 | 0 | 100    | STM1017  | STM2623  |      | Gifsy-2_prc  | 1108334 |
| 100 | 1 | 100    | STM4473  |          | yjgM | putative_ac  | 4714986 |
| 100 | 1 | 100    | STM0542  |          | fold | bifunctiona  | 602702  |
| 100 | 0 | 60.577 | STM2593  |          |      | Gifsy-1_prc  | 2742853 |
| 100 | 1 | 100    | STM4565  |          | yjjW | pyruvate_fc  | 4818786 |
| 100 | 1 | 100    | STM3701  |          | secB | molecular_   | 3896036 |
| 100 | 1 | 100    | STM3509  |          | bioH | putative_hy  | 3667888 |
| 100 | 0 | 64.706 | STM4157  |          |      | putative_cy  | 4375350 |
| 100 | 1 | 100    | STM1774  |          | sirC | Regulation   | 1872112 |
| 100 | 1 | 100    | STM0513  |          | ybbB | putative_A   | 573686  |
| 100 | 0 | 59     | STM2596  |          |      | Gifsy-1_prc  | 2746587 |
| 100 | 0 | 63.107 | STM1028  | STM2612  |      | Gifsy-2_prc  | 1115210 |
| 100 | 1 | 100    | STM4400  |          | ytfF | putative_ca  | 4637134 |
| 100 | 0 | 83     | aSTM2614 | aSTM1026 |      |              |         |
| 100 | 1 | 100    | STM2655  |          |      | putative_cy  | 2795780 |
| 100 | 1 | 100    | STM3206  |          | folB | dihydroneo   | 3371486 |
| 100 | 1 | 100    | STM3535  |          | glgA | glycogen_s   | 3701379 |
| 100 | 1 | 100    | STM3738  |          | yigC | putative_in  | 3930542 |
| 100 | 1 | 100    | STM2548  |          | asrA | anaerobic_   | 2686443 |
| 100 | 1 | 100    | STM1203  |          | ptsG | Sugar_Spe    | 1286369 |
| 100 | 1 | 100    | STM4001  |          | yihA | putative_G   | 4209252 |
| 100 | 1 | 100    | STM0831  |          | dps  | stress_resp  | 897487  |
| 100 | 1 | 100    | STM0802  |          | moaA | molybdopte   | 870638  |
| 100 | 1 | 100    | STM1421  |          | ssaT | Secretion_   | 1499655 |
| 100 | 1 | 100    | STM2454  |          | eutR | putative_re  | 2564060 |
| 100 | 1 | 100    | STM4074  |          | ego  | putative_AI  | 4283501 |
| 100 | 1 | 100    | STM0642  |          | ybeB | putative_AI  | 704426  |
| 100 | 1 | 100    | STM0267  |          |      | putative_cy  | 305731  |
| 100 | 1 | 100    | STM2073  |          | hisC | histidinol_p | 2151918 |
| 100 | 1 | 100    | STM1696  |          | sapF | ABC_supe     | 1788160 |
| 100 | 1 | 100    | STM0385  |          | yaiC | putative_di  | 438129  |

|     |   |        |         |       |              |         |
|-----|---|--------|---------|-------|--------------|---------|
| 100 | 1 | 99     | STM1810 |       | putative_cy  | 1909931 |
| 100 | 0 | 98     | STM2132 |       | pseudogen    | 2225528 |
| 100 | 1 | 100    | STM0669 | phoL  | putative_pt  | 733236  |
| 100 | 1 | 100    | STM4289 | phnA  | putative_al  | 4530167 |
| 100 | 1 | 100    | STM1908 | yecM  | putative_cy  | 2001791 |
| 100 | 1 | 100    | STM4261 |       | putative_in  | 4482474 |
| 100 | 1 | 100    | STM3717 | rfaJ  | UDP-D-glu    | 3912487 |
| 100 | 1 | 100    | STM1855 | sopE2 | TypeIII-sec  | 1952012 |
| 100 | 1 | 100    | STM4167 | hemE  | uroporphyr   | 4384145 |
| 100 | 1 | 100    | STM3866 | atpG  | membrane     | 4075520 |
| 100 | 1 | 100    | STM2267 | ompC  | outer_merr   | 2365443 |
| 100 | 1 | 100    | STM0812 | ybhO  | cardiolipin_ | 877112  |
| 100 | 1 | 100    | STM0415 | ybaD  | putative_tr  | 469391  |
| 100 | 1 | 100    | STM4055 | sodA  | superoxide   | 4266539 |
| 100 | 1 | 100    | STM2063 | phsC  | Hydrogen_    | 2137321 |
| 100 | 1 | 100    | STM1690 | pspA  | phage_sho    | 1781747 |
| 100 | 1 | 100    | STM2681 | grpE  | molecular_   | 2821587 |
| 100 | 1 | 100    | STM3423 | rpsE  | 30S_ribosc   | 3587987 |
| 100 | 1 | 100    | STM3723 | rfaQ  | lipopolysac  | 3917859 |
| 100 | 1 | 100    | STM3987 | hemG  | protoporph   | 4195136 |
| 100 | 1 | 100    | STM2583 | lepA  | GTP-bindir   | 2726772 |
| 100 | 1 | 100    | STM3946 | yifL  | putative_ot  | 4152022 |
| 100 | 1 | 100    | STM3917 | rho   | transcriptio | 4125584 |
| 100 | 1 | 100    | STM1977 | fliN  | flagellar_bi | 2064536 |
| 100 | 1 | 100    | STM1802 | dadX  | alanine_rac  | 1901605 |
| 100 | 1 | 100    | STM2384 | aroC  | chorismate   | 2494541 |
| 100 | 1 | 100    | STM2324 | nuoF  | NADH_def     | 2434651 |
| 100 | 1 | 100    | STM3733 | pyrE  | orotate_ph   | 3925959 |
| 100 | 1 | 100    | STM2700 |       | Fels-2_pro   | 2849584 |
| 100 | 1 | 100    | STM2890 | spaP  | surface_pr   | 3033671 |
| 100 | 1 | 100    | STM4046 | rhaA  | L-rhamnos    | 4256052 |
| 100 | 1 | 100    | STM3973 | tatA  | component    | 4180504 |
| 100 | 1 | 100    | STM3174 | parC  | DNA_topoi    | 3336947 |
| 100 | 1 | 100    | STM2409 | nupC  | NUP_famil    | 2525303 |
| 100 | 1 | 100    | STM3901 | ilvG  | acetolactat  | 4108973 |
| 100 | 1 | 100    | STM0101 | araD  | L-ribulose-5 | 117241  |
| 100 | 0 | 100    | STM2933 | cysC  | adenosine_   | 3072350 |
| 100 | 1 | 100    | STM2921 |       | putative_fla | 3063182 |
| 100 | 1 | 100    | STM4010 |       | putative_hy  | 4219262 |
| 100 | 1 | 100    | STM0525 | glxK  | glycerate_3  | 586699  |
| 100 | 0 | 100    | STM0965 | dmsB  | anaerobic_   | 1047776 |
| 100 | 0 | 61.765 | STM0576 |       | putative_tr  | 635931  |
| 100 | 1 | 100    | STM1637 |       | putative_in  | 1726876 |
| 100 | 1 | 100    | STM1714 | topA  | DNA_topoi    | 1809792 |
| 100 | 0 | 75     | STM1568 | fdnI  | formate_de   | 1648895 |
| 100 | 1 | 100    | STM1817 | rnd   | RNase_D_     | 1914022 |
| 100 | 1 | 100    | STM1647 | ldhA  | fermentativ  | 1740029 |
| 100 | 1 | 100    | STM1864 |       | putative_in  | 1960722 |
| 100 | 1 | 100    | STM1674 |       | putative_ba  | 1767332 |
| 100 | 1 | 100    | STM1895 | ruvA  | Holliday_ju  | 1990073 |
| 100 | 1 | 100    | STM0534 | purE  | phosphorib   | 597116  |
| 100 | 1 | 100    | STM0580 |       | putative_re  | 638146  |

|     |   |              |          |              |         |
|-----|---|--------------|----------|--------------|---------|
| 100 | 1 | 100 STM1654  | ydaO     | putative_A   | 1747309 |
| 100 | 1 | 100 STM1583  |          | putative_cy  | 1669505 |
| 100 | 1 | 100 STM0343  |          | putative_Di  | 387109  |
| 100 | 1 | 100 STM1769  | yehN     | putative_Ai  | 1868323 |
| 100 | 1 | 100 STM1606  |          | putative_be  | 1696306 |
| 100 | 0 | 91 STM1871   |          | putative_pt  | 1967026 |
| 100 | 1 | 100 STM1898  | ruvC     | Holliday_ju  | 1993228 |
| 100 | 1 | 100 STM3802  | dsdA     | D-serine_d   | 4004453 |
| 100 | 1 | 100 STM2987  | ygdL     | paral_putat  | 3138843 |
| 100 | 0 | 77 STM2705   |          | Fels-2_pro   | 2853408 |
| 100 | 0 | 64 STM3084   |          | putative_re  | 3247098 |
| 100 | 0 | 100 STM3133  |          | putative_ar  | 3293145 |
| 100 | 1 | 100 STM3914  | rhIB     | putative_hc  | 4123427 |
| 100 | 1 | 100 STM3661  | xylA     | D-xylose_is  | 3846467 |
| 100 | 0 | 100 STM1186  |          | pseudogen    | 1271648 |
| 100 | 1 | 100 STM2968  | yqcD     | putative_G   | 3117881 |
| 100 | 1 | 100 STM2687  | yfjG     | putative_O   | 2825858 |
| 100 | 1 | 100 STM3053  | gcvP     | glycine_cle  | 3212137 |
| 100 | 1 | 100 STM3106  | ansB     | periplasmic  | 3265481 |
| 100 | 1 | 100 STM4131  | murl     | glutamate_   | 4349899 |
| 100 | 1 | 100 STM3109  | yggH     | putative_S   | 3267811 |
| 100 | 0 | 100 STM0618  | citT     | DASS_fam     | 680905  |
| 100 | 0 | 100 aSTM2211 | aSTM2210 |              |         |
| 100 | 1 | 99 STM2797   |          | putative_re  | 2946041 |
| 100 | 1 | 100 STM1691  | pspF     | transcriptio | 1782586 |
| 100 | 1 | 100 STM3039  | idi      | isopenteny   | 3198598 |
| 100 | 1 | 100 STM0365  | yahN     | paral_putat  | 414812  |
| 100 | 1 | 100 STM3653  |          | putative_ac  | 3838674 |
| 100 | 1 | 100 STM2202  | yehH     | putative_in  | 2301531 |
| 100 | 0 | 90 STM2237   |          | putative_in  | 2337198 |
| 100 | 1 | 100 STM2159  | yehU     | paral_putat  | 2254460 |
| 100 | 1 | 100 STM2194  | yehG     | putative_es  | 2291442 |
| 100 | 1 | 100 STM2106  | wcal     | putative_gl  | 2189940 |
| 100 | 1 | 100 STM2164  | yehY     | putative_Al  | 2258902 |
| 100 | 1 | 100 STM3694  | lldD     | L-lactate_d  | 3888337 |
| 100 | 1 | 100 STM3440  | rplC     | 50S_ribosc   | 3595557 |
| 100 | 1 | 100 STM4358  | amiB     | N-acetylm    | 4600364 |
| 100 | 1 | 100 STM3433  | rplP     | 50S_ribosc   | 3592019 |
| 100 | 1 | 100 STM3038  |          | putative_m   | 3197575 |
| 100 | 1 | 100 STM4380  | yjfP     | putative_hy  | 4622200 |
| 100 | 1 | 100 STM4548  | bglJ     | transcriptio | 4806803 |
| 100 | 1 | 100 STM4333  | yjeK     | putative_ar  | 4578541 |
| 100 | 1 | 100 STM2156  | yehR     | putative_lip | 2252013 |
| 100 | 1 | 100 STM0666  | Int      | apolipoprot  | 730172  |
| 100 | 1 | 100 STM3092  | sprT     | putative_cy  | 3254812 |
| 100 | 1 | 100 STM1075  | helD     | DNA_helic    | 1166434 |
| 100 | 1 | 100 STM0781  | modA     | ABC_supe     | 845675  |
| 100 | 1 | 100 STM0849  | yliB     | putative_Al  | 920005  |
| 100 | 1 | 100 STM3323  | yhbJ     | putative_P   | 3486808 |
| 100 | 1 | 100 STM0786  | ybhC     | putative_pe  | 850320  |
| 100 | 1 | 100 STM0826  | ybiN     | putative_S   | 891478  |
| 100 | 1 | 100 STM3054  | gcvH     | glycine_cle  | 3215173 |

|        |   |        |                  |      |              |         |
|--------|---|--------|------------------|------|--------------|---------|
| 100    | 1 | 100    | STM0263          | rnhA | RNase_HI,    | 302871  |
| 100    | 1 | 100    | STM3223          | ygiR | putative_de  | 3391006 |
| 100    | 1 | 100    | STM1397          | sseA | Secretion_   | 1483601 |
| 100    | 1 | 100    | STM0819          | ybiH | putative_tr  | 884682  |
| 100    | 1 | 100    | STM0866          | mdfA | multidrug_t  | 938495  |
| 100    | 1 | 100    | STM0409          |      | hypothetica  | 465308  |
| 100    | 0 | 100    | STM2682          |      | putative_cy  | 2822174 |
| 100    | 0 | 60.396 | STM4497          |      | putative_cy  | 4750638 |
| 100    | 1 | 100    | STM4528          |      | putative_in  | 4785649 |
| 100    | 1 | 100    | STM4318          |      | putative_ac  | 4562850 |
| 100    | 0 | 76     | STM4203          |      | putative_pt  | 4423923 |
| 100    | 1 | 100    | STM4222          | yjbE | putative_ou  | 4442252 |
| 100    | 0 | 58.252 | STM4197          |      | putative_in  | 4418843 |
| 100    | 1 | 100    | STM4181          | yjaB | putative_ac  | 4400247 |
| 100    | 1 | 100    | STM2016          | cobT | nicotinate-r | 2097303 |
| 100    | 0 | 58.416 | STM2744          |      | putative_cy  | 2883250 |
| 100    | 0 | 80.392 | STM2735          |      | Fels-2_pro   | 2875037 |
| 100    | 1 | 100    | STM2737          |      | Fels-2_pro   | 2875823 |
| 100    | 1 | 100    | STM3283          | rpsO | 30S_ribosc   | 3451624 |
| 100    | 1 | 100    | STM3047          | ygfY | putative_cy  | 3206402 |
| 100    | 1 | 100    | STM3259          |      | PTS_family   | 3428610 |
| 100    | 1 | 100    | STM1591          | ydcZ | putative_in  | 1678860 |
| 100    | 1 | 100    | STM1534          |      | putative_hy  | 1609982 |
| 100    | 1 | 100    | STM1611          | rimL | acetyl_tran  | 1701042 |
| 100    | 1 | 100    | STM3392          | yhdV | putative_ou  | 3565622 |
| 100    | 1 | 98     | STM0078          | fixX | putative_fe  | 91744   |
| 100    | 1 | 100    | STM1500          | ynfD | putative_ou  | 1579547 |
| 100    | 1 | 100    | STM2561          | glnB | regulatory_  | 2703659 |
| 100    | 0 | 98     | aSTM2509         |      | putative_in  | 2562125 |
| 100    | 1 | 100    | STM2452          |      | putative_pe  | 2712163 |
| 100    | 0 | 100    | STM2566          |      | putative_ar  | 2609474 |
| 100    | 1 | 100    | STM2495          | yfgD | [2FE-2S]_f   | 2677860 |
| 100    | 1 | 100    | STM2538          | fdx  | putative_gl  | 788914  |
| 100    | 1 | 100    | STM0724          |      | putative_cy  | 698029  |
| 100    | 1 | 100    | STM0636          | ybeD | putative_in  | 2410946 |
| 100    | 1 | 100    | STM2303          |      | alpha-helic  | P39670  |
| 100    | 0 | 65.385 | PSLT048          | tlpA | putative_pe  | P18899  |
| 100    | 0 | 62.385 | PSLT026          |      | putative_in  | P32929  |
| 100    | 0 | 63     | PSLT042          |      | putative_ba  | P07569  |
| 100    | 0 | 96     | PSLT012          | orf7 | putative_ou  | P03730  |
| 100    | 1 | 98     | PSLT007 aPSLT010 |      | plasmid-en   | P07904  |
| 100    | 0 | 93     | PSLT013          | pefl | putative_cy  | P86973  |
| 100    | 0 | 74     | aPSLT105 PSLT107 |      | antisense_   | P61461  |
| 100    | 0 | 48.039 | PSLT074          | finP | R830         |         |
| 51.961 | 0 | 58     |                  |      |              |         |
| 100    | 0 | 74     | aSTM0353         |      |              |         |
| 100    | 0 | 100    | aSTM0476         |      |              |         |
| 100    | 0 | 100    | aSTM0498         |      |              |         |
| 100    | 0 | 100    | aSTM0522         |      |              |         |
| 100    | 0 | 99     | aSTM0558         |      |              |         |
| 100    | 0 | 100    | aSTM0600         |      |              |         |
| 100    | 1 | 100    | aSTM1215         |      |              |         |



|        |   |        |          |         |          |                     |
|--------|---|--------|----------|---------|----------|---------------------|
| 60.185 | 1 | 100    |          |         |          |                     |
| 79     | 1 | 100    |          |         |          |                     |
| 69     | 1 | 100    |          |         |          |                     |
| 94     | 1 | 100    |          |         |          |                     |
| 62.264 | 1 | 100    |          |         | aSTM1268 |                     |
| 61.682 | 1 | 100    |          |         |          |                     |
| 61.386 | 1 | 100    |          |         |          |                     |
| 90     | 1 | 100    |          |         |          |                     |
| 62.617 | 1 | 100    |          |         |          |                     |
| 64.706 | 0 | 100    |          |         |          |                     |
| 43     | 0 | 100    |          |         |          |                     |
| 57.282 | 1 | 100    |          |         |          |                     |
| 75.248 | 1 | 100    |          |         |          |                     |
| 71     | 1 | 100    |          |         |          |                     |
| 94     | 0 | 100    |          |         |          |                     |
| 91     | 1 | 100    |          |         |          |                     |
| 61     | 1 | 100    |          |         |          |                     |
| 79     | 1 | 100    |          |         |          |                     |
| 61.765 | 1 | 100    |          |         |          |                     |
| 60.194 | 1 | 100    |          |         |          |                     |
| 53.465 | 1 | 100    |          |         |          |                     |
| 58.416 | 1 | 100    |          |         |          |                     |
| 74     | 1 | 100    |          |         |          |                     |
| 62.376 | 1 | 100    |          |         |          |                     |
| 64.356 | 1 | 100    |          |         |          |                     |
| 56.604 | 1 | 100    |          |         |          |                     |
| 59.223 | 1 | 100    |          |         |          |                     |
| 62.162 | 1 | 100    |          |         |          |                     |
| 67.619 | 1 | 100    |          |         |          |                     |
| 61.818 | 1 | 100    |          |         |          |                     |
| 60.396 | 1 | 100    |          |         |          |                     |
| 100    | 0 | 100    | aSTM2720 |         |          |                     |
| 62.857 | 1 | 100    |          |         |          |                     |
| 68     | 1 | 100    |          |         |          |                     |
| 60.577 | 1 | 100    |          |         |          |                     |
| 100    | 1 | 100    |          | STM3041 | prfB     | peptide_ch 3200746  |
| 100    | 1 | 100    | STM2397  |         | pgtB     | Phosphogl 2508498   |
| 100    | 1 | 100    | STM2029  |         | cbiF     | synthesis_ 2107760  |
| 100    | 1 | 100    | STM3577  |         | tcp      | methyl-acc 3744842  |
| 100    | 1 | 100    | STM0123  |         | murE     | UDP-N-acc 143479    |
| 100    | 1 | 100    | STM0158  |         | acnB     | aconitate_ 185857   |
| 100    | 1 | 100    | STM0148  |         |          | putative_cy 170860  |
| 100    | 0 | 61.538 | STM0174  |         | stiH     | putative_fir 203991 |
| 100    | 1 | 100    | STM0193  |         | fhuD     | ABC_supe 226773     |
| 100    | 1 | 100    | STM0234  |         | ldcC     | lysine_dec 276022   |
| 100    | 1 | 100    | STM1514  |         | ydeJ     | putative_C 1592376  |
| 100    | 0 | 61.538 | STM3640  |         | lpfA     | long_polar_ 3827449 |
| 100    | 1 | 100    | STM0697  |         | seqA     | negative_r 759191   |
| 100    | 1 | 100    | STM1965  |         | yedE     | paral_putal 2053742 |
| 100    | 1 | 100    | STM3711  |         | rfaF     | ADP-hepto 3906251   |
| 100    | 1 | 100    | STM2024  |         | cbiL     | synthesis_ 2103704  |
| 100    | 1 | 100    | STM1725  |         | trpC     | bifunctiona 1821711 |

|     |   |        |         |          |              |         |
|-----|---|--------|---------|----------|--------------|---------|
| 100 | 1 | 100    | STM0081 |          | putative_se  | 94131   |
| 100 | 1 | 100    | STM3853 | phoU     | regulatory_  | 4060000 |
| 100 | 1 | 99     | STM0015 |          | putative_ba  | 16088   |
| 100 | 1 | 100    | STM3110 | mutY     | adenine_D    | 3268685 |
| 100 | 1 | 100    | STM3312 | yrbE     | putative_Al  | 3478156 |
| 100 | 1 | 100    | STM3347 | yhcB     | putative_pe  | 3514856 |
| 100 | 1 | 100    | STM0632 | ybeC     | putative_Sc  | 694573  |
| 100 | 0 | 100    | STM1110 |          | putative_cy  | 1197678 |
| 100 | 1 | 100    | STM1152 | yceK     | putative_ou  | 1240563 |
| 100 | 1 | 100    | STM3497 | yrfH     | heat_shock   | 3653063 |
| 100 | 0 | 72.549 | STM3522 | rtcR     | sigma_N_(    | 3684868 |
| 100 | 1 | 100    | STM3544 | yhhW     | putative_cy  | 3713292 |
| 100 | 1 | 100    | STM4541 | mdbB     | phosphogly   | 4799699 |
| 100 | 1 | 100    | STM1204 | fhuE     | outer_merr   | 1287887 |
| 100 | 0 | 61.165 | STM3527 |          | putative_in  | 3690286 |
| 100 | 0 | 100    | STM3552 | yhhA     | putative_ou  | 3722330 |
| 100 | 1 | 100    | STM4545 |          | putative_in  | 4804164 |
| 100 | 1 | 100    | STM4585 | gpmB     | putative_pf  | 4842022 |
| 100 | 0 | 63     | STM0295 |          | putative_cy  | 340044  |
| 100 | 1 | 100    | STM3576 | zntA     | P-type_ATI   | 3742444 |
| 100 | 0 | 61.165 | STM4572 | stjB     | putative_fir | 4826467 |
| 100 | 0 | 53.922 | STM2726 |          | Fels-2_pro   | 2868892 |
| 100 | 0 | 60.577 | STM2747 |          | putative_cy  | 2887401 |
| 100 | 0 | 60.396 | STM2763 |          | putative_in  | 2905475 |
| 100 | 1 | 100    | STM2788 |          | tricarboxyli | 2936024 |
| 100 | 1 | 100    | STM4244 | yjbO     | putative_in  | 4465126 |
| 100 | 1 | 100    | STM4295 | adiY     | transcriptio | 4537638 |
| 100 | 1 | 100    | STM0868 |          | putative_tra | 940593  |
| 100 | 0 | 67.647 | STM0896 |          | Fels-1_pro   | 965341  |
| 100 | 1 | 100    | STM2477 | yffH     | putative_py  | 2587089 |
| 100 | 0 | 45.098 | STM0948 |          | putative_cy  | 1026941 |
| 100 | 1 | 100    | STM2450 | amiA     | N-acetylm    | 2560333 |
| 100 | 1 | 100    | STM0936 | hcr      | NADH_oxid    | 1011983 |
| 100 | 1 | 100    | STM0969 | ycaM     | putative_Al  | 1050974 |
| 100 | 1 | 100    | STM0994 | mukB     | kinesin-line | 1080209 |
| 100 | 0 | 59.223 | STM1041 | aSTM2594 | Gifsy-2_pr   | 1126009 |
| 100 | 0 | 100    | STM4093 | ftsN     | essential_c  | 4301113 |
| 100 | 0 | 72     | STM2901 |          | putative_cy  | 3045263 |
| 100 | 1 | 100    | STM4343 | frdA     | fumarate_r   | 4583982 |
| 100 | 1 | 100    | STM2420 | xapR     | regulator_f  | 2532394 |
| 100 | 0 | 66.337 | STM0918 |          | Fels-1_pro   | 988625  |
| 100 | 1 | 100    | STM2533 | sseA     | putative_st  | 2672906 |
| 100 | 1 | 100    | STM2569 | yfhB     | putative_    | 2714568 |
| 100 | 1 | 100    | STM2560 | yjdL     | putative_P   | 2702150 |
| 100 | 1 | 100    | STM4349 | yjeQ     | putative_G   | 4593638 |
| 100 | 1 | 100    | STM2009 | amn      | AMP_nucle    | 2091307 |
| 100 | 1 | 100    | STM2316 | nuoN     | NADH_def     | 2424354 |
| 100 | 1 | 100    | STM2360 |          | putative_di  | 2471265 |
| 100 | 1 | 100    | STM1198 | pabC     | 4-amino-4-   | 1281800 |
| 100 | 1 | 97     | STM2056 | pduV     | Propanedic   | 2131003 |
| 100 | 0 | 100    | STM3445 | aSTM4146 | protein_ch   | 3598302 |
| 100 | 1 | 100    | STM1488 | mlc      | transcriptio | 1565101 |

|     |   |        |         |          |              |         |
|-----|---|--------|---------|----------|--------------|---------|
| 100 | 1 | 100    | STM0304 | sinR     | transcriptio | 348610  |
| 100 | 1 | 100    | STM1441 |          | putative_in  | 1516547 |
| 100 | 1 | 100    | STM4397 | fkIB     | FKBP-type    | 4633890 |
| 100 | 1 | 100    | STM0115 | leuO     | putative_tr  | 134569  |
| 100 | 0 | 100    | STM1941 |          | putative_in  | 2034780 |
| 100 | 0 | 83     | STM2006 |          | putative_br  | 2085406 |
| 100 | 0 | 53.465 | STM4435 |          | putative_cy  | 4679372 |
| 100 | 1 | 100    | STM2313 | elaC     | putative_m   | 2419660 |
| 100 | 1 | 100    | STM2340 |          | putative_tr  | 2453149 |
| 100 | 1 | 100    | STM4464 |          | putative_ar  | 4705807 |
| 100 | 0 | 62     | STM4496 |          | putative_A   | 4746985 |
| 100 | 1 | 100    | STM2359 |          | putative_ar  | 2469753 |
| 100 | 1 | 100    | STM1190 | yceD     | putative_m   | 1275273 |
| 100 | 1 | 100    | STM1343 | nlpC     | lipoprotein  | 1422020 |
| 100 | 1 | 100    | STM1084 | yccK     | putative_su  | 1173852 |
| 100 | 1 | 100    | STM0301 | safC     | putative_fir | 343566  |
| 100 | 1 | 100    | STM0232 | accA     | acetylCoA_   | 273043  |
| 100 | 1 | 100    | STM0443 | cyoA     | cytochrome   | 497191  |
| 100 | 1 | 100    | STM0153 | aceF     | pyruvate_d   | 178918  |
| 100 | 1 | 100    | STM1317 | celG     | putative_gl  | 1396312 |
| 100 | 0 | 59.804 | STM1360 | ydiN     | putative_M   | 1441353 |
| 100 | 1 | 100    | STM2782 | mig-14   | putative_tr  | 2929595 |
| 100 | 1 | 100    | STM1460 | ydgK     | putative_in  | 1535006 |
| 100 | 1 | 100    | STM1486 | ynfM     | putative_M   | 1562701 |
| 100 | 1 | 100    | STM4229 | malE     | ABC_supe     | 4449329 |
| 100 | 1 | 100    | STM0306 |          | homologue    | 349893  |
| 100 | 1 | 100    | STM0377 | yaiW     | putative_ou  | 431594  |
| 100 | 1 | 100    | STM0407 | secD     | preprotein_  | 462331  |
| 100 | 1 | 100    | STM0124 | murF     | D-alanine:I  | 144963  |
| 100 | 1 | 100    | STM2363 | cvpA     | membrane     | 2475891 |
| 100 | 1 | 100    | STM2785 | tctD     | tricarboxyli | 2933761 |
| 100 | 1 | 100    | STM1370 | sufB     | putative_Al  | 1452692 |
| 100 | 1 | 100    | STM3561 | livG     | ABC_supe     | 3729369 |
| 100 | 1 | 100    | STM0461 | mdlB     | putative_Al  | 518531  |
| 100 | 1 | 100    | STM0568 | pheP     | APC_famil    | 624199  |
| 100 | 1 | 99.01  | STM2210 | aSTM2211 | pseudogen    | 2310186 |
| 100 | 1 | 100    | STM4412 |          | putative_pe  | 4651963 |
| 100 | 1 | 100    | STM2645 | yfiK     | paral_putat  | 2785257 |
| 100 | 1 | 100    | STM3641 | yhjY     | putative_lip | 3828491 |
| 100 | 1 | 100    | STM3275 | yhbV     | putative_pr  | 3441259 |
| 100 | 1 | 100    | STM2292 | yfaX     | putative_tr  | 2399433 |
| 100 | 1 | 100    | STM2540 | hscB     | co-chaperc   | 2680060 |
| 100 | 1 | 100    | STM0027 | bcfG     | fimbrial_ch  | 30478   |
| 100 | 1 | 100    | STM4415 | fbp      | fructose-bis | 4655498 |
| 100 | 1 | 100    | STM4543 | dnaC     | chromosom    | 4802792 |
| 100 | 0 | 61.261 | STM2598 |          | Gifsy-1_prc  | 2747787 |
| 100 | 1 | 100    | STM4550 | fhuF     | ferric_hydr  | 4808137 |
| 100 | 1 | 100    | STM3709 | kbl      | 2-amino-3-   | 3903917 |
| 100 | 1 | 100    | STM3620 | yhjQ     | putative_A   | 3803463 |
| 100 | 1 | 100    | STM3268 | yraR     | putative_nu  | 3436986 |
| 100 | 1 | 100    | STM2282 | glpQ     | glycerophos  | 2387530 |
| 100 | 1 | 100    | STM2277 | nrdA     | ribonucleos  | 2381400 |

|     |   |       |         |                          |              |         |
|-----|---|-------|---------|--------------------------|--------------|---------|
| 100 | 1 | 100   | STM2894 | invC                     | surface_pr   | 3036677 |
| 100 | 1 | 100   | STM4083 | yiiR                     | putative_in  | 4291842 |
| 100 | 1 | 100   | STM0699 |                          | putative_cy  | 761513  |
| 100 | 1 | 100   | STM0737 | sucB                     | 2-oxoglutar  | 804561  |
| 100 | 1 | 100   | STM4005 | glnG                     | response_I   | 4212857 |
| 100 | 1 | 100   | STM3469 | pabA                     | p-aminoben   | 3619759 |
| 100 | 1 | 100   | STM3999 | polA                     | DNA_polyn    | 4206131 |
| 100 | 1 | 100   | STM0876 | ybjN                     | putative_cy  | 947560  |
| 100 | 1 | 100   | STM3459 | yheS                     | putative_A   | 3609833 |
| 100 | 1 | 100   | STM4265 | soxS                     | transcriptio | 4503970 |
| 100 | 1 | 100   | STM2579 | recO                     | gap_repair   | 2723185 |
| 100 | 1 | 100   | STM1879 | ptrB                     | protease_ll  | 1971805 |
| 100 | 1 | 100   | STM4172 | zraP                     | zinc-resista | 4387727 |
| 100 | 1 | 100   | STM4016 | yshA                     | putative_ot  | 4225010 |
| 100 | 1 | 100   | STM1425 | ydhE                     | putative_M   | 1501962 |
| 100 | 0 | 100   | STM2437 | yfeJ                     | putative_G   | 2549810 |
| 100 | 0 | 100   | STM0946 | STM1957;_STM2471;_tnpA_1 | IS200_tran   | 1025166 |
| 100 | 1 | 100   | STM2661 | yfiH                     | putative_in  | 2804819 |
| 100 | 1 | 100   | STM0051 | yaaF                     | putative_pt  | 60164   |
| 100 | 0 | 98    | STM1007 | aSTM2634                 | Gifsy-2_pr   | 1099854 |
| 100 | 0 | 91    | STM1859 |                          | putative_cy  | 1956231 |
| 100 | 1 | 100   | STM3035 |                          | putative_pe  | 3195958 |
| 100 | 0 | 97    | STM4372 |                          | resembles_   | 4615573 |
| 100 | 1 | 100   | STM4504 |                          | putative_cy  | 4758454 |
| 100 | 1 | 100   | STM2051 | pduP                     | Propanedic   | 2126221 |
| 100 | 1 | 100   | STM4280 | nrfD                     | putative_ni  | 4518883 |
| 100 | 1 | 100   | STM1905 | yecO                     | putative_S   | 1999078 |
| 100 | 1 | 100   | STM4258 |                          | putative_m   | 4478486 |
| 100 | 1 | 100   | STM0009 | yaaH                     | putative_re  | 9376    |
| 100 | 0 | 91    | STM2696 |                          | Fels-2_pro   | 2845811 |
| 100 | 1 | 100   | STM0040 | nhaR                     | transcriptio | 47418   |
| 100 | 1 | 100   | STM3919 | wzzE                     | modulator_   | 4128188 |
| 100 | 1 | 100   | STM3962 | yigL                     | putative_hy  | 4166892 |
| 100 | 1 | 100   | STM3937 | hemD                     | uroporphyr   | 4144312 |
| 100 | 1 | 100   | STM3070 | epd                      | D-erythro    | 3231877 |
| 100 | 1 | 100   | STM1754 | yehK                     | putative_pl  | 1850043 |
| 100 | 0 | 100   |         | STM1790                  | putative_th  | 1889069 |
| 100 | 1 | 100   | STM3017 | kduD                     | 2-deoxy-D-   | 3177574 |
| 100 | 1 | 100   | STM2959 |                          | putative_gl  | 3109319 |
| 100 | 1 | 100   | STM2985 | ygdK                     | putative_S   | 3137161 |
| 100 | 1 | 100   | STM4053 |                          | putative_C   | 4264693 |
| 100 | 1 | 100   | STM2969 | ygdH                     | putative_nu  | 3118842 |
| 100 | 1 | 100   | STM4032 |                          | putative_ac  | 4240489 |
| 100 | 1 | 100   | STM3965 | metE                     | 5-methyltet  | 4169762 |
| 100 | 1 | 100   | STM3949 | xerC                     | putative_in  | 4153787 |
| 100 | 1 | 100   | STM3920 | wecB                     | UDP-N-ac     | 4129290 |
| 100 | 1 | 100   | STM4138 | birA                     | bifunctiona  | 4357697 |
| 100 | 1 | 100   | STM2996 | recC                     | exonucleas   | 3152712 |
| 100 | 1 | 100   | STM1742 | oppF                     | ABC_supe     | 1835623 |
| 100 | 1 | 100   | STM4081 | tpiA                     | triosephos   | 4290265 |
| 100 | 1 | 100   | STM0483 | apt                      | adenine_pl   | 540242  |
| 100 | 0 | 45.37 | STM0538 |                          | putative_ot  | 600564  |

|     |   |        |         |      |              |         |
|-----|---|--------|---------|------|--------------|---------|
| 100 | 1 | 100    | STM0585 | fepA | outer_merr   | 641558  |
| 100 | 1 | 100    | STM0976 | ycaP | putative_in  | 1060597 |
| 100 | 1 | 100    | STM0303 | ybeJ | putative_xy  | 346974  |
| 100 | 1 | 100    | STM1547 |      | putative_m   | 1624193 |
| 100 | 1 | 100    | STM1586 |      | putative_pe  | 1672585 |
| 100 | 0 | 60.55  | STM1625 | ydcI | putative_tr  | 1714895 |
| 100 | 1 | 100    | STM1661 | ydaA | putative_ur  | 1755277 |
| 100 | 0 | 100    | STM1650 |      | putative_re  | 1741765 |
| 100 | 0 | 100    | STM1698 |      | putative_in  | 1790157 |
| 100 | 1 | 100    | STM0509 |      | putative_ou  | 569722  |
| 100 | 1 | 100    | STM1001 |      | putative_le  | 1093080 |
| 100 | 1 | 100    | STM0956 | cydC | ABC_supe     | 1031626 |
| 100 | 0 | 100    | STM0620 | citX | putative_cy  | 683274  |
| 100 | 1 | 100    | STM0607 | dsbG | periplasmic  | 669262  |
| 100 | 1 | 100    | STM1732 | ompW | outer_merr   | 1827893 |
| 100 | 1 | 100    | STM1573 |      | putative_cy  | 1656405 |
| 100 | 1 | 100    | STM1621 |      | putative_pe  | 1709056 |
| 100 | 1 | 100    | STM1655 | dbpA | ATP-deper    | 1748288 |
| 100 | 1 | 100    | STM1685 | ycjX | putative_A   | 1778927 |
| 100 | 1 | 100    | STM2957 | ygcA | putative_R   | 3105166 |
| 100 | 1 | 100    | STM3006 | ygdQ | putative_in  | 3164258 |
| 100 | 1 | 100    | STM3036 |      | putative_in  | 3196484 |
| 100 | 1 | 100    | STM3099 | yggR | putative_pr  | 3259946 |
| 100 | 1 | 100    | STM0447 | tig  | peptidyl-pr  | 501665  |
| 100 | 1 | 100    | STM3583 | yhhU | putative_PI  | 3750673 |
| 100 | 1 | 100    | STM3679 |      | putative_cy  | 3865900 |
| 100 | 1 | 100    | STM3767 |      | putative_cy  | 3967814 |
| 100 | 1 | 100    | STM3176 | ygiW | putative_ou  | 3340254 |
| 100 | 1 | 100    | STM3015 | ygeA | putative_as  | 3174982 |
| 100 | 0 | 58.879 | STM3079 |      | putative_hy  | 3240644 |
| 100 | 0 | 65.347 | STM3123 |      | putative_ar  | 3282394 |
| 100 | 1 | 100    | STM3628 | dppC | ABC_supe     | 3812334 |
| 100 | 1 | 100    | STM3665 | avtA | valine-pyru  | 3852732 |
| 100 | 1 | 100    | STM3697 |      | putative_m   | 3891455 |
| 100 | 1 | 100    | STM3748 | yicH | putative_in  | 3942764 |
| 100 | 1 | 100    | STM0358 | res  | DNA_restri   | 405299  |
| 100 | 1 | 100    | STM2853 | hycA | transcriptio | 2999127 |
| 100 | 1 | 100    | STM3132 |      | putative_xy  | 3292183 |
| 100 | 1 | 100    | STM2855 | hypB | hydrogena    | 3000223 |
| 100 | 1 | 100    | STM2182 | yohK | putative_tr  | 2278317 |
| 100 | 1 | 100    | STM2084 | rfbM | LPS_side     | 2163853 |
| 100 | 1 | 100    | STM2121 | dcd  | dUTPase      | 2206886 |
| 100 | 0 | 100    | STM2248 | ccmG | heme_lyas    | 2348433 |
| 100 | 1 | 100    | STM2218 | yejE | putative_Al  | 2319128 |
| 100 | 1 | 100    | STM2145 | yegW | putative_re  | 2239479 |
| 100 | 1 | 100    | STM1844 | htpX | heat_shock   | 1940059 |
| 100 | 1 | 100    | STM3418 | rpsM | 30S_ribosc   | 3585376 |
| 100 | 1 | 100    | STM3591 | uspA | universal_ε  | 3760855 |
| 100 | 1 | 100    | STM3341 | sspB | stringent_s  | 3510047 |
| 100 | 1 | 100    | STM3612 | kdgK | ketodeoxy    | 3787580 |
| 100 | 1 | 100    | STM3512 | gntT | GntP_famil   | 3670390 |
| 100 | 1 | 100    | STM4404 | cysQ | affects_poc  | 4641771 |

|     |   |        |         |                   |              |         |
|-----|---|--------|---------|-------------------|--------------|---------|
| 100 | 1 | 100    | STM3182 | yqiA              | putative_es  | 3345882 |
| 100 | 1 | 100    | STM2837 | srIR              | transcriptio | 2981637 |
| 100 | 1 | 100    | STM2186 |                   | putative_N   | 2281393 |
| 100 | 1 | 100    | STM3162 | yghB              | putative_D   | 3322322 |
| 100 | 1 | 100    | STM1408 | ssal              | Secretion_   | 1490032 |
| 100 | 1 | 100    | STM0734 | sdhA              | succinate_   | 798722  |
| 100 | 1 | 100    | STM0801 | ybhK              | putative_cy  | 869333  |
| 100 | 0 | 66.337 | STM0858 |                   | putative_de  | 930332  |
| 100 | 1 | 100    | STM1175 | flgC              | flagellar_bi | 1258667 |
| 100 | 1 | 100    | STM0793 | bioA              | 7,8-diamino  | 858794  |
| 100 | 0 | 44.762 | STM0839 |                   | putative_in  | 907237  |
| 100 | 1 | 100    | STM3332 | yhcG              | putative_cy  | 3500618 |
| 100 | 1 | 100    | STM3756 | rmbA              | putative_cy  | 3954069 |
| 100 | 1 | 100    | STM3188 | ygiC              | putative_gl  | 3350932 |
| 100 | 1 | 100    | STM1404 | sseF              | Secretion_   | 1487975 |
| 100 | 1 | 100    | STM0833 | ompX              | outer_merr   | 899534  |
| 100 | 1 | 97     | STM4384 | sgaB              | putative_P   | 4626646 |
| 100 | 0 | 62.5   | STM4430 |                   | putative_st  | 4673403 |
| 100 | 1 | 100    | STM0394 | araJ              | MFS_famil    | 444896  |
| 100 | 0 | 99     | STM4525 | hsdM              | DNA_meth     | 4779012 |
| 100 | 1 | 100    | STM0453 | ybaV              | putative_D   | 510688  |
| 100 | 1 | 100    | STM0551 |                   | putative_D   | 612233  |
| 100 | 0 | 100    |         | STM0554;_aSTM0555 | homology_    | 613593  |
| 100 | 1 | 99     | STM0298 |                   | putative_in  | 341178  |
| 100 | 0 | 100    | STM0342 |                   | putative_pe  | 386310  |
| 100 | 1 | 99     | STM0344 |                   | putative_re  | 388783  |
| 100 | 1 | 100    | STM2967 | syd               | interacts_w  | 3117267 |
| 100 | 1 | 97     | STM4316 |                   | putative_cy  | 4562022 |
| 100 | 0 | 99     | STM4071 |                   | putative_M   | 4280242 |
| 100 | 1 | 100    | STM3783 |                   | putative_pe  | 3983664 |
| 100 | 1 | 100    | STM3143 | hybG              | hydrogena    | 3307202 |
| 100 | 1 | 100    | STM1535 |                   | putative_hy  | 1610389 |
| 100 | 0 | 100    | STM1520 | marR              | transcriptio | 1597497 |
| 100 | 1 | 99     | STM3805 | yidH              | putative_in  | 4006736 |
| 100 | 1 | 100    | STM3744 | recG              | DNA_helic    | 3936881 |
| 100 | 1 | 100    | STM3623 | yhjT              | putative_in  | 3806232 |
| 100 | 1 | 100    | STM3795 | ilvN              | acetolactat  | 3995623 |
| 100 | 0 | 51.923 | STM3516 |                   | putative_cy  | 3679693 |
| 100 | 1 | 100    | STM1366 |                   | putative_pr  | 1449557 |
| 100 | 0 | 100    | STM4133 | ileU              | glutamate_   | 4352741 |
| 100 | 0 | 85     | STM1865 |                   | putative_cy  | 1961663 |
| 100 | 0 | 98     | STM4478 |                   | putative_cy  | 4722003 |
| 100 | 0 | 100    | STM4000 | spf               | spot_42_R    | 4209084 |
| 100 | 0 | 100    | STM4140 |                   | pseudogen    | 4359725 |
| 100 | 1 | 98     | STM3911 |                   | putative_in  | 4119514 |
| 100 | 0 | 99     | STM3387 | yhdU              | putative_pe  | 3557611 |
| 100 | 1 | 100    | STM3308 | yrbA              | putative_tr  | 3476208 |
| 100 | 0 | 100    | STM1939 |                   | putative_gl  | 2032589 |
| 100 | 0 | 86     | PSLT054 | samB              | mutagenes    | P46078  |
| 100 | 0 | 79     | PSLT055 | samA              | mutagenes    | P47352  |
| 100 | 0 | 63.889 | PSLT040 | spvA              | Salmonella   | P30148  |
| 100 | 0 | 63     | PSLT064 |                   | putative_in  | P53359  |

|        |   |        |          |                   |             |         |
|--------|---|--------|----------|-------------------|-------------|---------|
| 100    | 0 | 76     | PSLT051  |                   | putative_cy | P42461  |
| 100    | 0 | 72     | PSLT024  | aPSLT023          | hypothetic  | P17369  |
| 100    | 0 | 63.366 | PSLT062  |                   | putative_cy | P52188  |
| 100    | 0 | 47     | PSLT004  |                   | DNA_repl    | P01723  |
| 60.952 | 0 | 60.952 |          | repA3<br>stbA     |             | R20506  |
| 100    | 0 | 100    | aSTM2267 |                   |             |         |
| 100    | 0 | 100    | aSTM2351 |                   |             |         |
| 100    | 0 | 100    | aSTM2355 |                   |             |         |
| 100    | 0 | 100    | aSTM2473 |                   |             |         |
| 100    | 1 | 100    | STM2479  | aegA              | putative_o  | 2589615 |
| 100    | 0 | 69     | STM2509  |                   | putative_IS | 2622292 |
| 66     | 1 | 100    |          |                   |             |         |
| 41     | 1 | 100    |          |                   |             |         |
| 100    | 0 | 100    | aSTM0541 |                   |             |         |
| 62.037 | 1 | 100    |          |                   |             |         |
| 61.538 | 1 | 100    |          |                   |             |         |
| 54.717 | 1 | 100    |          |                   |             |         |
| 100    | 1 | 100    |          | aSTM0373          |             |         |
| 57.843 | 1 | 100    |          |                   |             |         |
| 63.107 | 1 | 100    |          |                   |             |         |
| 62     | 1 | 100    |          |                   |             |         |
| 83     | 1 | 100    |          |                   |             |         |
| 64.356 | 1 | 100    |          |                   |             |         |
| 90.099 | 1 | 100    |          |                   |             |         |
| 62.376 | 1 | 100    |          |                   |             |         |
| 61.468 | 1 | 100    |          |                   |             |         |
| 59.813 | 1 | 100    |          |                   |             |         |
| 64.22  | 1 | 100    |          |                   |             |         |
| 61     | 1 | 100    |          |                   |             |         |
| 100    | 0 | 100    | aSTM0907 | aSTM1869A         |             |         |
| 60     | 1 | 100    |          |                   |             |         |
| 61.321 | 1 | 100    |          |                   |             |         |
| 62     | 1 | 100    |          |                   |             |         |
| 100    | 0 | 100    | STM0055  | STM0767;_aSTM3352 | putative_o  | 64862   |
| 90     | 1 | 100    |          |                   |             |         |
| 97     | 1 | 100    |          |                   |             |         |
| 100    | 0 | 100    | aSTM4185 |                   |             |         |
| 60.784 | 1 | 100    |          |                   |             |         |
| 48.039 | 1 | 100    |          |                   |             |         |
| 65.714 | 1 | 100    |          |                   |             |         |
| 100    | 0 | 100    | aSTM4514 |                   |             |         |
| 63.107 | 1 | 100    |          |                   |             |         |
| 61.765 | 1 | 100    |          |                   |             |         |
| 94     | 1 | 100    |          |                   |             |         |
| 60.396 | 0 | 100    |          |                   |             |         |
| 60.577 | 1 | 100    |          |                   |             |         |
| 60.396 | 1 | 100    |          |                   |             |         |
| 100    | 1 | 100    | STM3821  | torD              | cytoplasmic | 4020186 |
| 100    | 1 | 100    | STM3843  | trmE              | GTPase_fc   | 4048213 |
| 100    | 1 | 100    | STM3871  | atpB              | membrane    | 4079352 |
| 100    | 1 | 100    | STM3715  | rfaZ              | lipopolysac | 3910807 |
| 100    | 1 | 100    | STM3313  | yrbF              | putative_AI | 3478946 |

|     |   |        |         |          |              |             |         |
|-----|---|--------|---------|----------|--------------|-------------|---------|
| 100 | 0 | 100    | STM3350 |          | putative_in  | 3517981     |         |
| 100 | 1 | 100    | STM3342 | sspA     | stringent_s  | 3510553     |         |
| 100 | 1 | 100    | STM3374 | mreB     | rod_shape    | 3543516     |         |
| 100 | 1 | 100    | STM0637 | dacA     | D-alanyl-D-  | 698401      |         |
| 100 | 0 | 65.385 | STM0659 | hscC     | putative_he  | 722533      |         |
| 100 | 1 | 100    | STM0693 | fur      | transcriptio | 756394      |         |
| 100 | 1 | 100    | STM3824 | torR     | response_I   | 4024667     |         |
| 100 | 1 | 100    | STM1537 |          | putative_Ni  | 1611302     |         |
| 100 | 0 | 67.961 |         | STM3828  | dgoA         | galactonate | 4030635 |
| 100 | 1 | 100    | STM3848 | yidZ     | putative_tr  | 4055233     |         |
| 100 | 1 | 100    | STM3880 | kup      | KUP_famil    | 4089594     |         |
| 100 | 1 | 100    | STM1332 | rfc      | O-antigen_   | 1410087     |         |
| 100 | 1 | 100    | STM0776 | galE     | UDP-galac    | 840581      |         |
| 100 | 1 | 100    | STM2030 | cbiT     | synthesis_   | 2108517     |         |
| 100 | 1 | 100    | STM3714 | rfaK     | putative_he  | 3909561     |         |
| 100 | 0 | 100    | STM0084 |          | putative_su  | 95959       |         |
| 100 | 1 | 100    | STM0138 | yacG     | putative_cy  | 162263      |         |
| 100 | 1 | 100    | STM0171 | yadF     | putative_ca  | 201410      |         |
| 100 | 1 | 100    | STM0211 | yaeH     | putative_cy  | 247318      |         |
| 100 | 1 | 100    | STM3405 | smf      | putative_pr  | 3575680     |         |
| 100 | 1 | 100    | STM3461 |          | putative_cy  | 3612126     |         |
| 100 | 1 | 100    | STM1211 | ndh      | respiratory_ | 1294454     |         |
| 100 | 1 | 100    | STM1253 |          | putative_in  | 1337448     |         |
| 100 | 1 | 100    | STM1286 | mipA     | scaffolding  | 1364189     |         |
| 100 | 1 | 100    | STM2116 | wzc      | putative_ty  | 2198900     |         |
| 100 | 1 | 100    | STM1214 | ycfR     | putative_ou  | 1297428     |         |
| 100 | 1 | 99     | STM1261 |          | putative_cy  | 1345317     |         |
| 100 | 1 | 100    | STM1288 |          | putative_al  | 1366518     |         |
| 100 | 1 | 100    | STM2119 | yegH     | putative_in  | 2203325     |         |
| 100 | 1 | 100    | STM4600 | lasT     | putative_tR  | 4856722     |         |
| 100 | 0 | 60.952 | STM2753 |          | putative_de  | 2891101     |         |
| 100 | 1 | 100    | STM2109 | gmd      | GDP-D-ma     | 2192603     |         |
| 100 | 1 | 100    | STM2136 | yegQ     | putative_pr  | 2229684     |         |
| 100 | 0 | 63.208 | STM0275 |          | putative_cy  | 316307      |         |
| 100 | 0 | 99     | STM0297 |          | putative_tr  | 340755      |         |
| 100 | 0 | 73     | STM0329 |          | putative_3-  | 372773      |         |
| 100 | 1 | 100    | STM1061 | ycbY     | putative_Ni  | 1149884     |         |
| 100 | 1 | 100    | STM4126 | udhA     | soluble_py   | 4343980     |         |
| 100 | 1 | 100    | STM2915 | ygbM     | putative_er  | 3058032     |         |
| 100 | 1 | 100    | STM2386 | yfcN     | putative_Si  | 2496760     |         |
| 100 | 1 | 100    | STM2424 | yfeR     | putative_tr  | 2536770     |         |
| 100 | 0 | 59.459 | STM0921 |          | Fels-1_pro   | 992892      |         |
| 100 | 1 | 100    | STM2526 | ndk      | nucleoside   | 2660070     |         |
| 100 | 0 | 59.804 | STM0915 |          | Fels-1_pro   | 986714      |         |
| 100 | 1 | 100    | STM2510 | guaA     | GMP_syntl    | 2622805     |         |
| 100 | 1 | 100    | STM2544 | yfhP     | believed_tc  | 2682931     |         |
| 100 | 0 | 65.347 | STM2586 | aSTM1868 | Gifsy-1_pro  | 2733337     |         |
| 100 | 1 | 100    | STM4059 | cpxR     | response_I   | 4269746     |         |
| 100 | 0 | 87     | STM4213 |          | putative_pl  | 4433964     |         |
| 100 | 1 | 100    | STM2911 |          | putative_pe  | 3053279     |         |
| 100 | 0 | 78     | STM2944 | ygcB     | putative_he  | 3084040     |         |
| 100 | 1 | 100    | STM2441 | cysA     | ABC_supe     | 2552630     |         |



|     |   |        |          |        |              |         |
|-----|---|--------|----------|--------|--------------|---------|
| 100 | 1 | 100    | STM2486  |        | putative_in  | 2601110 |
| 100 | 1 | 100    | STM0972  |        | homologou    | 1054061 |
| 100 | 1 | 100    | STM1003  |        | putative_tr  | 1095317 |
| 100 | 1 | 100    | STM0991  | smtA   | S-adenosyl   | 1077406 |
| 100 | 1 | 100    | STM1953  | yedO   | putative_1-  | 2042050 |
| 100 | 1 | 100    | STM2075  | hisH   | glutamine_   | 2154058 |
| 100 | 1 | 100    | STM2333  | yfbS   | putative_re  | 2443994 |
| 100 | 1 | 100    | STM2054  | pduT   | Propanedic   | 2130094 |
| 100 | 1 | 100    | STM1270  | yeaS   | paral_putat  | 1350595 |
| 100 | 1 | 100    | STM1132  |        | putative_su  | 1221641 |
| 100 | 1 | 100    | STM1327  | ydiY   | putative_sa  | 1406311 |
| 100 | 1 | 100    | STM0371  | prpE   | putative_ac  | 421688  |
| 100 | 1 | 100    | STM1318  | katE   | catalase;_f  | 1397114 |
| 100 | 1 | 100    | STM4355  | yjeS   | putative_Fc  | 4597229 |
| 100 | 0 | 100    | aSTM1995 |        |              |         |
| 100 | 1 | 100    | STM1390  | orf242 | putative_re  | 1475260 |
| 100 | 1 | 100    | STM4378  | yjfN   | putative_in  | 4621281 |
| 100 | 0 | 64.356 | STM4418  |        | sugar_(anc   | 4659425 |
| 100 | 1 | 100    | STM2276  | ubiG   | 3-demethyl   | 2380316 |
| 100 | 0 | 63.462 | STM4494  |        | putative_Al  | 4742171 |
| 100 | 1 | 100    | STM4519  |        | putative_N.  | 4774458 |
| 100 | 1 | 100    | STM2298  | pmrF   | putative_gl  | 2405113 |
| 100 | 1 | 99     | STM2332  |        | putative_hy  | 2443303 |
| 100 | 0 | 63.889 | STM4537  |        | putative_P'  | 4795858 |
| 100 | 1 | 100    | STM1269  |        | putative_cf  | 1349853 |
| 100 | 0 | 64.22  | STM0200  | stfG   | putative_m   | 235734  |
| 100 | 1 | 100    | STM0368  | prpB   | putative_ca  | 417977  |
| 100 | 1 | 100    | STM2649  | trxC   | thioredoxin  | 2788654 |
| 100 | 1 | 100    | STM0390  | aroM   | protein_of_  | 441859  |
| 100 | 1 | 100    | STM4236  | dgkA   | diacylglyce  | 4458772 |
| 100 | 1 | 100    | STM2347  | yfcE   | putative_pt  | 2459019 |
| 100 | 1 | 100    | STM2297  | yfbE   | putative_Di  | 2403953 |
| 100 | 1 | 100    | STM4226  | yjbA   | putative_in  | 4446172 |
| 100 | 1 | 100    | STM1375  | ynhG   | putative_Ly  | 1457989 |
| 100 | 1 | 100    | STM1582  | nhoA   | putative_ar  | 1668376 |
| 100 | 1 | 100    | STM2265  | ada    | bifunctiona  | 2363134 |
| 100 | 1 | 100    | STM3785  |        | putative_re  | 3984439 |
| 100 | 1 | 100    | STM2577  | acpS   | holo-[acyl-c | 2722062 |
| 100 | 1 | 100    | STM0165  | speD   | S-adenosyl   | 194201  |
| 100 | 1 | 100    | STM2061  | sbmC   | DNA_gyras    | 2135405 |
| 100 | 1 | 100    | STM0146  | ampD   | N-acetyl-ar  | 169354  |
| 100 | 1 | 100    | STM0156  |        | putative_pe  | 183042  |
| 100 | 1 | 100    | STM1333  | thrS   | threonine_t  | 1412202 |
| 100 | 1 | 100    | STM0425  | thil   | sulfur_tran  | 477868  |
| 100 | 1 | 100    | STM1477  | ydgl   | putative_ar  | 1552544 |
| 100 | 1 | 100    | STM0495  | ybaK   | putative_cy  | 555403  |
| 100 | 1 | 100    | STM0496  | ybaP   | putative_cy  | 556084  |
| 100 | 1 | 100    | STM0594  | fepB   | ABC_supe     | 654990  |
| 100 | 1 | 100    | STM4475  | valS   | valine_tRN   | 4717013 |
| 100 | 1 | 100    | STM4598  | arcA   | response_i   | 4855370 |
| 100 | 1 | 100    | STM3216  |        | putative_m   | 3380802 |
| 100 | 1 | 100    | STM3743  | spoU   | putative_tR  | 3936186 |

|     |   |        |         |         |             |              |         |
|-----|---|--------|---------|---------|-------------|--------------|---------|
| 100 | 1 | 100    | STM1260 |         | putative_in | 1343990      |         |
| 100 | 1 | 100    | STM2421 |         | xapB        | MFS_supe     | 2533547 |
| 100 | 1 | 100    | STM2773 |         | iroB        | putative_gl  | 2916377 |
| 100 | 0 | 61.386 | STM2604 |         |             | Gifsy-1_pr   | 2751976 |
| 100 | 1 | 100    | STM1019 | STM2621 |             | Gifsy-2_pr   | 1109305 |
| 100 | 0 | 56.863 | STM2606 |         |             | Gifsy-1_pr   | 2753822 |
| 100 | 1 | 100    | STM2642 |         | yfiC        | putative_tr  | 2782035 |
| 100 | 1 | 100    | STM3192 |         |             | putative_ar  | 3355503 |
| 100 | 1 | 100    | STM3587 |         | yhil        | paral_puta   | 3755696 |
| 100 | 1 | 100    | STM3490 |         | yrfB        | putative_in  | 3644757 |
| 100 | 1 | 100    | STM2453 |         |             | putative_cy  | 2562583 |
| 100 | 1 | 100    | STM2887 |         | spaS        | surface_pr   | 3031533 |
| 100 | 0 | 98     | STM2465 |         | eutM        | putative_de  | 2575212 |
| 100 | 1 | 100    | STM4056 |         | yiiM        | putative_cy  | 4267166 |
| 100 | 1 | 100    | STM0661 |         | ybeK        | putative_pt  | 725558  |
| 100 | 1 | 100    | STM0708 |         | ybfA        | putative_pe  | 774461  |
| 100 | 1 | 100    | STM2900 |         | invH        | invasion_p   | 3044389 |
| 100 | 1 | 100    | STM0552 |         | fimW        | putative_fir | 612706  |
| 100 | 1 | 100    | STM0784 |         | ybhA        | putative_hy  | 848199  |
| 100 | 1 | 100    | STM0771 |         |             | putative_Al  | 835496  |
| 100 | 1 | 100    | STM1070 |         | ompA        | putative_hy  | 1160965 |
| 100 | 1 | 100    | STM1177 |         | flgE        | flagellar_bi | 1259808 |
| 100 | 1 | 100    | STM1776 |         | prfA        | peptide_ch   | 1873331 |
| 100 | 1 | 100    | STM1928 |         | otsA        | trehalose-6  | 2023300 |
| 100 | 1 | 99     | STM1999 |         |             | putative_cy  | 2081709 |
| 100 | 1 | 100    | STM3869 |         | atpF        | membrane     | 4078536 |
| 100 | 1 | 100    | STM1435 |         | gloA        | glyoxalase_  | 1512450 |
| 100 | 1 | 100    | STM1952 |         | yecS        | putative_Al  | 2041361 |
| 100 | 1 | 100    | STM1675 |         |             | putative_st  | 1768000 |
| 100 | 1 | 100    | STM2638 |         | rseB        | anti_sigma   | 2777790 |
| 100 | 1 | 100    | STM0730 |         | gltA        | citrate_syn  | 795954  |
| 100 | 1 | 100    | STM1230 |         | phoQ        | sensory_ki   | 1317226 |
| 100 | 1 | 100    | STM4175 |         | purD        | phosphorib   | 4391161 |
| 100 | 1 | 100    | STM3286 |         | infB        | protein_ch   | 3453610 |
| 100 | 1 | 99     | STM2041 |         | pduD        | Propanedic   | 2119633 |
| 100 | 1 | 100    | STM4453 |         | treC        | trehalose_   | 4695100 |
| 100 | 1 | 100    | STM1394 |         | ssaC        | Secretion_   | 1480402 |
| 100 | 1 | 100    | STM1194 |         | fabD        | malonyl-Cc   | 1278281 |
| 100 | 1 | 100    | STM1705 |         | osmB        | osmotically  | 1799923 |
| 100 | 1 | 100    | STM3355 |         |             | putative_ta  | 3522864 |
| 100 | 1 | 100    | STM3721 |         | rfaP        | lipopolysac  | 3915948 |
| 100 | 0 | 79     | STM1009 | STM2632 |             | Gifsy-2_pr   | 1101256 |
| 100 | 1 | 100    | STM1143 |         | csgB        | minor_curli  | 1231133 |
| 100 | 1 | 100    | STM3979 |         | ubiB        | FMN_reduc    | 4185162 |
| 100 | 1 | 100    | STM2673 |         | rpIS        | 50S_ribosc   | 2814873 |
| 100 | 1 | 100    | STM3925 |         | wecE        | TDP-4-oxo    | 4133663 |
| 100 | 1 | 100    | STM3906 |         |             | putative_cy  | 4115668 |
| 100 | 1 | 100    | STM1181 |         | flgl        | putative_fl  | 1263356 |
| 100 | 1 | 100    | STM3477 |         | cysG        | siroheme_    | 3627468 |
| 100 | 1 | 100    | STM3002 |         | lgt         | phosphatid   | 3158818 |
| 100 | 1 | 100    | STM3210 |         | dnaG        | DNA_biosy    | 3374506 |
| 100 | 1 | 100    | STM0427 |         | phnU        | 2-aminoeth   | 480160  |

|     |   |        |         |      |              |         |
|-----|---|--------|---------|------|--------------|---------|
| 100 | 1 | 100    | STM4036 | fdoH | formate_de   | 4243843 |
| 100 | 1 | 100    | STM0828 | glnQ | ABC_supe     | 894742  |
| 100 | 1 | 100    | STM3982 | fadA | 3-ketoacyl-  | 4188137 |
| 100 | 1 | 100    | STM1914 | flhB | putative_pr  | 2010283 |
| 100 | 1 | 100    | STM0996 | ycbK | putative_ot  | 1087121 |
| 100 | 1 | 100    | STM3677 | sgbE | L-ribulose-  | 3863965 |
| 100 | 1 | 100    | STM0179 | yadE | putative_xy  | 209795  |
| 100 | 1 | 100    | STM0608 | ahpC | alkyl_hydr   | 670449  |
| 100 | 1 | 100    | STM3011 | galR | transcriptio | 3170624 |
| 100 | 1 | 100    | STM4039 |      | putative_in  | 4249107 |
| 100 | 1 | 100    | STM1893 | zunB | ABC_supe     | 1988190 |
| 100 | 1 | 100    | STM1559 |      | putative_gl  | 1638192 |
| 100 | 1 | 100    | STM1578 | narY | nitrate_red  | 1664425 |
| 100 | 1 | 100    | STM1580 | narV | nitrate_red  | 1666661 |
| 100 | 1 | 100    | STM0337 | stbD | putative_fir | 379705  |
| 100 | 1 | 100    | STM1739 | cls  | cardiolipin_ | 1832868 |
| 100 | 1 | 100    | STM1800 | ycgQ | putative_hc  | 1898798 |
| 100 | 1 | 100    | STM1847 | yebR | putative_G   | 1943986 |
| 100 | 1 | 100    | STM1891 | znuA | ABC_supe     | 1986415 |
| 100 | 1 | 100    | STM1663 | ynal | putative_in  | 1756772 |
| 100 | 0 | 100    | STM0479 |      | putative_tr  | 537930  |
| 100 | 1 | 100    | STM0613 |      | putative_hy  | 676537  |
| 100 | 0 | 73     | STM0571 |      | putative_in  | 629330  |
| 100 | 1 | 100    | STM0591 | fepG | ABC_supe     | 651576  |
| 100 | 1 | 100    | STM0341 |      | putative_in  | 385573  |
| 100 | 1 | 100    | STM0624 | citC | citrate_lyas | 686566  |
| 100 | 0 | 62.376 | STM1552 |      | putative_cy  | 1627919 |
| 100 | 1 | 100    | STM1793 |      | putative_cy  | 1891949 |
| 100 | 0 | 60.784 | STM1630 |      | putative_in  | 1720151 |
| 100 | 1 | 100    | STM1886 | zwf  | glucose-6-p  | 1979667 |
| 100 | 0 | 59.292 | STM1933 |      | putative_rit | 2027922 |
| 100 | 0 | 63.462 | STM3169 |      | putative_di  | 3331597 |
| 100 | 1 | 100    | STM2692 |      | putative_Hl  | 2842712 |
| 100 | 1 | 100    | STM3069 | pgk  | phosphogly   | 3230692 |
| 100 | 1 | 100    | STM0410 |      | putative_re  | 465699  |
| 100 | 1 | 100    | STM3152 |      | putative_m   | 3314324 |
| 100 | 1 | 100    | STM2832 | srlA | PTS_family   | 2978308 |
| 100 | 0 | 100    | STM0266 |      | putative_cy  | 304665  |
| 100 | 1 | 100    | STM4529 |      | putative_cy  | 4785923 |
| 100 | 1 | 100    | STM2978 | fucU | conserved_   | 3131516 |
| 100 | 0 | 92     | STM2697 |      | Fels-2_pro   | 2846293 |
| 100 | 1 | 100    | STM0386 | proC | pyrroline-5- | 439256  |
| 100 | 1 | 100    | STM0439 | cyoE | protohaem    | 493354  |
| 100 | 1 | 100    | STM3004 | ygdP | putative_in  | 3162168 |
| 100 | 1 | 100    | STM4445 |      | putative_di  | 4686469 |
| 100 | 1 | 100    | STM1504 | ynfA | putative_in  | 1581800 |
| 100 | 1 | 100    | STM3908 | ilvY | positive_re  | 4116326 |
| 100 | 1 | 100    | STM2838 | gutQ | putative_pc  | 2982442 |
| 100 | 0 | 100    | STM3540 | yhgN | putative_in  | 3709861 |
| 100 | 0 | 100    | STM0350 |      | homology_    | 392419  |
| 100 | 1 | 100    | STM2828 | oraA | regulator    | 2974237 |
| 100 | 1 | 100    | STM2191 | galS | transcriptio | 2288115 |

|     |   |        |         |               |              |         |
|-----|---|--------|---------|---------------|--------------|---------|
| 100 | 1 | 100    | STM2226 | yejK          | nucleotide_  | 2327474 |
| 100 | 1 | 100    | STM2140 | yegS          | putative_di  | 2234013 |
| 100 | 1 | 100    | STM2172 | yohG          | putative_O   | 2268829 |
| 100 | 1 | 100    | STM2204 | fruA          | Sugar_Spe    | 2303581 |
| 100 | 1 | 100    | STM2142 | yegT          | putative_M   | 2236271 |
| 100 | 1 | 100    | STM2175 |               | putative_m   | 2271771 |
| 100 | 1 | 100    | STM3671 | yiaM          | putative_tr  | 3858208 |
| 100 | 1 | 100    | STM0930 | orfB          | putative_cy  | 1005367 |
| 100 | 1 | 100    | STM4369 | yjfH          | putative_tR  | 4613593 |
| 100 | 1 | 100    | STM3451 | yheN          | putative_A   | 3603486 |
| 100 | 1 | 100    | STM4362 | hflX          | putative_G   | 4604955 |
| 100 | 1 | 100    | STM3279 | mtr           | HAAAP_fa     | 3444787 |
| 100 | 1 | 100    | STM4583 | trpR          | transcriptio | 4841030 |
| 100 | 1 | 100    | STM2820 | yqaB          | putative_pt  | 2968990 |
| 100 | 1 | 100    | STM2213 | yeiU          | putative_pe  | 2312525 |
| 100 | 1 | 100    | STM3112 | mltC          | membrane     | 3270153 |
| 100 | 0 | 100    | STM3061 | ygfA          | putative_li  | 3222350 |
| 100 | 1 | 100    | STM0756 | nadA          | quinolinate  | 820233  |
| 100 | 1 | 100    | STM0821 | dinG          | LexA_regu    | 887158  |
| 100 | 1 | 100    | STM3042 | recJ          | ssDNA_ex     | 3201949 |
| 100 | 1 | 100    | STM3267 | yraP          | paral_putat  | 3436344 |
| 100 | 1 | 100    | STM0806 | moaE          | molybdopte   | 872889  |
| 100 | 1 | 100    | STM0852 | yliG          | putative_Fe  | 923529  |
| 100 | 1 | 100    | STM1384 | ttrC          | Tetrathiona  | 1469410 |
| 100 | 1 | 100    | STM3231 | yqjK          | putative_in  | 3397501 |
| 100 | 0 | 100    | STM2771 | aSTM1959 fljB | Flagellar_s  | 2913230 |
| 100 | 1 | 100    | STM3073 |               | putative_Al  | 3234327 |
| 100 | 1 | 100    | STM0843 | pflF          | putative_py  | 911347  |
| 100 | 1 | 100    | STM0378 | yaiY          | putative_in  | 432726  |
| 100 | 1 | 100    | STM0446 | bolA          | morphogere   | 501001  |
| 100 | 0 | 64.706 | STM4489 |               | putative_st  | 4731963 |
| 100 | 0 | 78     | STM2694 |               | Fels-2_pro   | 2844427 |
| 100 | 0 | 61.386 | STM4535 |               | putative_P   | 4794934 |
| 100 | 0 | 98     | STM4335 | ecnA          | putative_er  | 4580195 |
| 100 | 0 | 58.654 | STM4320 |               | putative_ba  | 4565999 |
| 100 | 1 | 100    | STM4324 | cutA          | putative_pe  | 4569061 |
| 100 | 1 | 100    | STM4340 | frdD          | fumarate_r   | 4582479 |
| 100 | 1 | 100    | STM2899 | invF          | invasion_p   | 3043282 |
| 100 | 1 | 100    | STM1779 | ipk           | isopenteny   | 1876644 |
| 100 | 1 | 100    | STM2709 |               | Fels-2_pro   | 2857059 |
| 100 | 1 | 100    | STM2107 | wcaH          | GDP-manr     | 2191160 |
| 100 | 1 | 100    | STM3605 |               | putative_pt  | 3779106 |
| 100 | 1 | 100    | STM3303 | rpmA          | 50S_ribosc   | 3472501 |
| 100 | 1 | 100    | STM3111 | yggX          | putative_cy  | 3269765 |
| 100 | 1 | 100    | STM3052 |               | putative_ou  | 3210788 |
| 100 | 1 | 100    | STM1888 | pykA          | pyruvate_k   | 1982477 |
| 100 | 1 | 100    | STM1644 | ydbL          | putative_pe  | 1736631 |
| 100 | 1 | 99     | STM3361 | yhcN          | putative_ou  | 3528863 |
| 100 | 1 | 100    | STM2059 | yeeX          | putative_cy  | 2133648 |
| 100 | 1 | 100    | STM0290 |               | putative_cy  | 332086  |
| 100 | 1 | 100    | STM2426 |               | putative_cy  | 2538781 |
| 100 | 0 | 59.434 | STM2584 | gogB          | Gifsy-1_prc  | 2728976 |

|        |   |                |          |              |         |
|--------|---|----------------|----------|--------------|---------|
| 100    | 1 | 99 STM2492     |          | putative_G   | 2606156 |
| 100    | 1 | 100 STM2518    | yfgJ     | putative_cy  | 2651147 |
| 100    | 1 | 100 STM2380    | yfcL     | putative_cy  | 2492048 |
| 100    | 1 | 100 STM2400    |          | putative_in  | 2513797 |
| 100    | 1 | 100 STM1770    | chaB     | cation_tran  | 1868756 |
| 100    | 1 | 100 STM0635    | lipB     | putative_liç | 697288  |
| 100    | 1 | 100 STM0688    | ybfN     | putative_liç | 750990  |
| 100    | 1 | 100 STM2365    | folC     | multifunctic | 2477354 |
| 100    | 0 | 62.5 PSLT046   |          | putative_cç  | P37528  |
| 100    | 0 | 60.784 PSLT025 |          | putative_cy  | P18119  |
| 100    | 0 | 61.386 PSLT001 |          | putative_cy  | P00094  |
| 100    | 0 | 65.385 PSLT111 | finO     | conjugative  | P93355  |
| 100    | 0 | 63 PSLT061     |          | putative_in  | P50928  |
| 100    | 0 | 63 PSLT027     | ccdA     | toxin_addic  | P20096  |
| 100    | 0 | 77.451 PSLT002 |          | putative_pł  | P00712  |
| 100    | 0 | 41.026 PSLT005 | tap      | replication_ | P01850  |
| 56.731 | 0 | 66             |          | R1032        |         |
| 100    | 1 | 100 STM0475    | acrB     | RND_famil    | 529247  |
| 100    | 0 | 100 aSTM0479   |          |              |         |
| 100    | 0 | 97 aSTM0521    |          |              |         |
| 100    | 1 | 99 STM0555     |          | pseudogen    | 613750  |
| 100    | 0 | 100 aSTM0585   |          |              |         |
| 100    | 0 | 100 aSTM0621   |          |              |         |
| 59.223 | 1 | 100            |          |              |         |
| 63.725 | 1 | 100            |          |              |         |
| 61.682 | 1 | 100            |          |              |         |
| 80     | 0 | 100            |          |              |         |
| 61.165 | 1 | 100            |          |              |         |
| 62     | 1 | 100            |          |              |         |
| 63.725 | 1 | 100            |          |              |         |
| 82     | 1 | 100            |          |              |         |
| 57.944 | 1 | 100            |          |              |         |
| 60.396 | 0 | 100            |          |              |         |
| 44.118 | 1 | 100            |          |              |         |
| 70     | 1 | 100            |          |              |         |
| 65     | 1 | 100            |          |              |         |
| 100    | 1 | 100 aSTM1457   |          |              |         |
| 63.725 | 0 | 100            |          |              |         |
| 62.5   | 0 | 100            |          |              |         |
| 64.151 | 0 | 100            |          |              |         |
| 58.095 | 1 | 100            |          |              |         |
| 100    | 1 | 100            | aSTM1380 |              |         |
| 60.396 | 1 | 100            |          |              |         |
| 59.259 | 1 | 100            |          |              |         |
| 61.765 | 1 | 100            |          |              |         |
| 79     | 1 | 100            |          |              |         |
| 61.538 | 1 | 100            |          |              |         |
| 63.81  | 1 | 100            |          |              |         |
| 98     | 0 | 100 aSTM2732   |          |              |         |
| 60     | 1 | 100            |          |              |         |
| 55.238 | 1 | 100            |          |              |         |
| 73     | 1 | 100            |          |              |         |

|        |   |        |         |          |              |         |
|--------|---|--------|---------|----------|--------------|---------|
| 77     | 1 | 100    |         |          |              |         |
| 59.048 | 1 | 100    |         |          |              |         |
| 58.095 | 1 | 100    |         |          |              |         |
| 99     | 1 | 100    |         | aSTM4281 |              |         |
| 59.406 | 1 | 100    |         |          |              |         |
| 58.252 | 1 | 100    |         |          |              |         |
| 95     | 1 | 100    |         | aSTM0324 |              |         |
| 100    | 1 | 100    | STM0172 | yadG     | putative_Al  | 202181  |
| 100    | 1 | 100    | STM0229 | lpxB     | tetraacyldis | 267783  |
| 100    | 1 | 100    | STM1511 | ydfG     | putative_o   | 1588802 |
| 100    | 1 | 100    | STM4292 | basR     | response_I   | 4533719 |
| 100    | 1 | 100    | STM2396 | pgtA     | Phosphogl    | 2507261 |
| 100    | 1 | 100    | STM3872 | atpl     | membrane     | 4080176 |
| 100    | 1 | 100    | STM3385 | fis      | site-specifi | 3556262 |
| 100    | 1 | 100    | STM2034 | cibB     | synthesis_c  | 2111466 |
| 100    | 1 | 100    | STM2018 | cobU     | bifunctiona  | 2099140 |
| 100    | 1 | 100    | STM0061 | citF2    | putativ_bifl | 70880   |
| 100    | 1 | 100    | STM3305 | ispB     | octaprenyl_  | 3473347 |
| 100    | 0 | 64.078 | STM3343 |          | putative_cy  | 3511454 |
| 100    | 1 | 100    | STM0095 | rluA     | 23S_rRNA     | 109331  |
| 100    | 1 | 100    | STM0152 | aceE     | pyruvate_d   | 176240  |
| 100    | 0 | 66.019 | STM0177 | stiA     | putative_fir | 208383  |
| 100    | 1 | 100    | STM0208 | dgt      | deoxyguan    | 242845  |
| 100    | 1 | 100    | STM0240 | yaeJ     | putative-tR  | 281234  |
| 100    | 0 | 100    | STM1524 | ynel     | putative_su  | 1601183 |
| 100    | 1 | 100    | STM0648 | leuS     | leucine_tRl  | 709125  |
| 100    | 0 | 50     | STM0672 |          | putative_in  | 737297  |
| 100    | 1 | 100    | STM0716 |          | putative_pt  | 781628  |
| 100    | 1 | 100    | STM4552 |          | putative_in  | 4810361 |
| 100    | 1 | 100    | STM2715 |          | Fels-2_pro   | 2859833 |
| 100    | 0 | 71     | STM2749 |          | putative_cy  | 2888824 |
| 100    | 1 | 100    | STM4563 | yjjU     | putative_pt  | 4816910 |
| 100    | 1 | 100    | STM4593 | sthB     | putative_fir | 4849512 |
| 100    | 0 | 64.706 | STM0293 |          | putative_cy  | 337829  |
| 100    | 0 | 71     | STM0326 |          | pseudogen    | 369924  |
| 100    | 0 | 58.252 | STM1053 |          | Gifsy-2_pr   | 1141587 |
| 100    | 1 | 100    | STM4330 | mopA     | chaperone    | 4575111 |
| 100    | 1 | 100    | STM0312 | yafK     | putative_pe  | 356810  |
| 100    | 0 | 63.462 | STM1045 |          | Gifsy-2_pr   | 1130676 |
| 100    | 1 | 100    | STM1079 | yccV     | putative_in  | 1170371 |
| 100    | 1 | 100    | STM1122 | ycdC     | putative_tr  | 1206508 |
| 100    | 1 | 100    | STM1157 | yceI     | putative_se  | 1244860 |
| 100    | 1 | 100    | STM1205 | ycfF     | putative_pr  | 1290403 |
| 100    | 1 | 100    | STM1081 |          | putative_ou  | 1172172 |
| 100    | 1 | 99     | STM3400 | yrdB     | putative_pe  | 3573012 |
| 100    | 1 | 100    | STM3456 | yheV     | putative_cy  | 3607000 |
| 100    | 1 | 100    | STM3493 | mrcA     | transpeptid  | 3646629 |
| 100    | 0 | 62.281 | STM3518 | rtcA     | RNA_3'-ter   | 3680340 |
| 100    | 1 | 100    | STM3541 | gntU     | low_affinity | 3710158 |
| 100    | 1 | 100    | STM0964 | dmsA     | anaerobic_   | 1045321 |
| 100    | 1 | 100    | STM4014 |          | putative_pe  | 4222967 |
| 100    | 1 | 100    | STM4075 | ydeY     | putative_Al  | 4285030 |

|     |   |        |         |          |       |              |         |
|-----|---|--------|---------|----------|-------|--------------|---------|
| 100 | 0 | 69     | STM4115 |          | pflC  | putative_py  | 4331077 |
| 100 | 1 | 100    | STM2859 |          | fhIA  | formate_hy   | 3003702 |
| 100 | 0 | 100    | STM2917 |          | ygbK  | paral_putat  | 3059448 |
| 100 | 1 | 100    | STM4108 |          | gldA  | glycerol_de  | 4322703 |
| 100 | 1 | 100    | STM2850 |          | hycD  | hydrogena:   | 2995621 |
| 100 | 0 | 100    | STM2908 |          |       | putative_cy  | 3049599 |
| 100 | 0 | 62.745 | STM2942 |          |       | putative_tr: | 3081915 |
| 100 | 1 | 100    | STM2413 |          | yfeC  | putative_ne  | 2529353 |
| 100 | 1 | 100    | STM2480 |          | narQ  | sensory_hi   | 2591762 |
| 100 | 0 | 84     | STM1026 | aSTM2614 |       | Gifsy-2_prc  | 1113935 |
| 100 | 1 | 100    | STM4085 |          | glpX  | unknown_f    | 4293220 |
| 100 | 0 | 69.903 | STM4112 |          | frwC  | PTS_syste    | 4327301 |
| 100 | 1 | 100    | STM4287 |          | phnO  | putative_re  | 4529018 |
| 100 | 0 | 60     | STM4346 |          | yjeO  | putative_in  | 4588852 |
| 100 | 1 | 100    | STM2422 |          | xapA  | xanthosine   | 2534858 |
| 100 | 1 | 100    | STM1258 |          |       | putative_A`  | 1342527 |
| 100 | 1 | 100    | STM1480 |          | pntB  | pyridine_nu  | 1557235 |
| 100 | 0 | 100    | STM2514 |          | ratB  | putative_ot  | 2634402 |
| 100 | 1 | 100    | STM0022 |          | bcfB  | fimbrial_ch  | 25112   |
| 100 | 1 | 100    | STM4373 |          | yjfK  | putative_cy  | 4616616 |
| 100 | 1 | 100    | STM4409 |          | ytfM  | putative_ot  | 4646053 |
| 100 | 1 | 100    | STM4416 |          | mpl   | UDP-N-acc    | 4656671 |
| 100 | 1 | 100    | STM2274 |          |       | putative_pe  | 2377974 |
| 100 | 0 | 60.55  | STM4492 |          |       | putative_cy  | 4738772 |
| 100 | 1 | 100    | STM4517 |          | yjiO  | putative_M   | 4772042 |
| 100 | 1 | 100    | STM1133 |          |       | putative_de  | 1222932 |
| 100 | 1 | 100    | STM1334 |          | infC  | protein_ch:  | 1414242 |
| 100 | 1 | 100    | STM2357 |          |       | putative_ar  | 2467178 |
| 100 | 1 | 100    | STM1255 |          |       | putative_Al  | 1339123 |
| 100 | 0 | 73     | STM0198 |          | stfE  | putaive_mi   | 234749  |
| 100 | 1 | 100    | STM1153 |          | msyB  | acidic_prot  | 1240791 |
| 100 | 1 | 100    | STM1282 |          | yeaK  | putative_cy  | 1357717 |
| 100 | 1 | 100    | STM1427 |          | cfa   | cyclopropa   | 1504235 |
| 100 | 1 | 100    | STM1160 |          | solA  | putative_sa  | 1246421 |
| 100 | 1 | 100    | STM1294 |          | ansA  | cytoplasmic  | 1371798 |
| 100 | 1 | 100    | STM3997 |          | dsbA  | periplasmic  | 4204199 |
| 100 | 1 | 100    | STM1311 |          | osmE  | transcriptio | 1391165 |
| 100 | 0 | 64.356 | STM1868 | aSTM2586 | mig-3 | Homology_    | 1963476 |
| 100 | 1 | 100    | STM1449 |          | tyrS  | tyrosine_tR  | 1523487 |
| 100 | 1 | 100    | STM1373 |          | sufS  | selenocyste  | 1456185 |
| 100 | 1 | 100    | STM1170 |          | mviN  | putative_vit | 1254964 |
| 100 | 1 | 99     | STM1416 |          | ssaO  | Secretion_   | 1496995 |
| 100 | 1 | 100    | STM3873 |          | gidB  | associate_   | 4081172 |
| 100 | 1 | 100    | STM2646 |          | yfiD  | putative_fo  | 2785906 |
| 100 | 1 | 100    | STM0236 |          | mesJ  | cell_cycle_  | 278671  |
| 100 | 1 | 100    | STM0401 |          | malZ  | maltodextri  | 456184  |
| 100 | 1 | 100    | STM4189 |          | yjbB  | putative_PI  | 4412289 |
| 100 | 1 | 100    | STM4273 |          | yjcG  | putative_S'  | 4511508 |
| 100 | 1 | 100    | STM1306 |          | astB  | succinylarg  | 1385917 |
| 100 | 1 | 100    | STM1345 |          | ydiU  | putative_cy  | 1423573 |
| 100 | 1 | 100    | STM1439 |          | ydhF  | putative_al  | 1515074 |
| 100 | 0 | 59.048 | STM2770 |          | fljA  | Flagellar_s  | 2912623 |

|     |   |             |          |      |              |         |
|-----|---|-------------|----------|------|--------------|---------|
| 100 | 1 | 100 STM2097 |          | rfbB | dTDP-gluc    | 2177495 |
| 100 | 1 | 100 STM2571 |          |      | putative_ar  | 2716579 |
| 100 | 1 | 100 STM0205 |          | yadS | putative_in  | 240609  |
| 100 | 1 | 100 STM0076 |          | fixB | putative_el  | 89470   |
| 100 | 1 | 100 STM0147 |          | ampE | putative_tr  | 169914  |
| 100 | 1 | 100 STM3613 |          | yhjJ | putative_Zr  | 3788563 |
| 100 | 1 | 100 STM3523 |          | glpR | transcriptio | 3686448 |
| 100 | 1 | 100 STM2305 |          | menE | o-succinylb  | 2411673 |
| 100 | 1 | 100 STM2520 |          | yfgL | putative_se  | 2653048 |
| 100 | 0 | 100         | STM0412  |      | putative_in  | 467156  |
| 100 | 1 | 100 STM0558 |          | yfdH | putative_gl  | 616437  |
| 100 | 1 | 100 STM4577 |          | smp  | membrane     | 4832463 |
| 100 | 1 | 100 STM3666 |          | ysaA | paral_putat  | 3854019 |
| 100 | 1 | 100 STM3604 |          |      | putative_in  | 3777236 |
| 100 | 1 | 100 STM3494 |          | yrfE | putative_N'  | 3649301 |
| 100 | 1 | 100 STM2290 |          | yfaV | putative_M   | 2396869 |
| 100 | 1 | 100 STM2497 |          | uraA | NCS2_fam     | 2610656 |
| 100 | 1 | 100 STM2337 |          | ackA | acetate_kir  | 2447939 |
| 100 | 1 | 100 STM1015 | STM2625  |      | Gifsy-2_pr   | 1107230 |
| 100 | 1 | 100 STM0532 |          | arcC | putative_ca  | 595118  |
| 100 | 1 | 100 STM4407 |          | ytfL | putative_he  | 4643676 |
| 100 | 0 | 91 STM2616  |          |      | Gifsy-1_pr   | 2762064 |
| 100 | 1 | 100 STM3179 |          | mdaB | NADPH_sp     | 3342910 |
| 100 | 1 | 100 STM3484 |          | dam  | DNA_aden     | 3638690 |
| 100 | 1 | 100 STM2206 |          | fruF | phosphoen    | 2306224 |
| 100 | 1 | 100 STM2278 |          | nrdB | ribonucleos  | 2383798 |
| 100 | 1 | 100 STM2456 |          | eutL | putative_ca  | 2565667 |
| 100 | 1 | 100 STM4080 |          |      | putative_rit | 4289409 |
| 100 | 1 | 100 STM0695 |          | ybfE | LexA_regu    | 757809  |
| 100 | 1 | 100 STM1242 |          | envE | putative_er  | 1329896 |
| 100 | 1 | 100 STM2886 |          | sicA | surface_pr   | 3030898 |
| 100 | 1 | 100 STM3996 |          | yihE | putative_hc  | 4203196 |
| 100 | 1 | 100 STM0853 |          | yliH | putative_cy  | 925085  |
| 100 | 1 | 100 STM3464 |          | prkB | putative_pt  | 3613968 |
| 100 | 1 | 100 STM4187 |          | iclR | acetate_op   | 4407211 |
| 100 | 1 | 100 STM1676 |          |      | putative_al  | 1768804 |
| 100 | 1 | 100 STM3416 |          | rpsD | 30S_ribosc   | 3584316 |
| 100 | 1 | 100 STM2184 |          | sanA | vancomycil   | 2280227 |
| 100 | 1 | 100 STM1731 |          |      | putative_ca  | 1826933 |
| 100 | 1 | 100 STM4173 |          | hydH | sensory_ki   | 4388436 |
| 100 | 1 | 100 STM2505 | aSTM2506 |      | putative_in  | 2621103 |
| 100 | 1 | 100 STM3003 |          | ptsP | General_P'   | 3159909 |
| 100 | 0 | 100         | STM2891; | spaO | surface pre  | 3034335 |
| 100 | 1 | 100 STM2065 |          | phsA | Hydrogen s   | 2138675 |
| 100 | 1 | 100 STM3363 |          | yhcO | putative cy  | 3529556 |
| 100 | 1 | 100 STM0016 |          |      | putative pro | 16493   |
| 100 | 1 | 99 STM0560  |          |      | pseudogen    | 618145  |
| 100 | 1 | 100 STM0047 |          | lspA | prolipoprot  | 56689   |
| 100 | 1 | 100 STM0715 |          |      | putative cy  | 781437  |
| 100 | 1 | 100 STM1666 |          |      | pseudogen    | 1759249 |
| 100 | 1 | 100 STM4018 |          | yihP | putative GF  | 4227237 |
| 100 | 1 | 100 STM2408 |          | mntH | Nramp fam    | 2523719 |



|     |   |        |         |      |              |         |
|-----|---|--------|---------|------|--------------|---------|
| 100 | 1 | 100    | STM2189 | mgIA | ABC super    | 2284964 |
| 100 | 1 | 100    | STM1365 | ydiJ | paral putati | 1446504 |
| 100 | 1 | 100    | STM1763 | narH | nitrate redu | 1856881 |
| 100 | 1 | 100    | STM1798 | ycgR | putative inr | 1897268 |
| 100 | 1 | 100    | STM3020 |      | putative tra | 3180959 |
| 100 | 1 | 100    | STM2962 | gudT | putative MF  | 3113237 |
| 100 | 1 | 100    | STM3008 | tas  | putative alc | 3165550 |
| 100 | 1 | 100    | STM3984 | pepQ | proline dip  | 4191689 |
| 100 | 1 | 100    | STM3539 | asd  | aspartate-s  | 3708628 |
| 100 | 1 | 100    | STM0092 | surA | peptidyl-pro | 104470  |
| 100 | 1 | 100    | STM3922 | rffG | dTDP-gluc    | 4131679 |
| 100 | 1 | 100    | STM3903 | ilvE | branched-c   | 4110897 |
| 100 | 1 | 100    | STM1752 | galU | glucose-1-p  | 1847828 |
| 100 | 1 | 100    | STM4153 | rpoB | RNA polym    | 4365908 |
| 100 | 1 | 100    | STM1808 |      | putative cy  | 1909153 |
| 100 | 1 | 100    | STM0103 | araB | L-ribulokin  | 119590  |
| 100 | 1 | 100    | STM1745 | oppB | ABC super    | 1838566 |
| 100 | 1 | 100    | STM2166 | bglX | beta-D-gluc  | 2261173 |
| 100 | 0 | 100    | STM3981 |      | putative cy  | 4186882 |
| 100 | 1 | 100    | STM0597 | entB | 2,3-dihydro  | 659064  |
| 100 | 1 | 100    | STM1710 | pgpB | phosphatid   | 1803149 |
| 100 | 1 | 100    | STM1755 | yehJ | putative cy  | 1851059 |
| 100 | 0 | 86.139 | STM1596 | ydcX | putative inr | 1686262 |
| 100 | 1 | 100    | STM1622 | ydcG | paral putati | 1709827 |
| 100 | 1 | 100    | STM1657 |      | putative me  | 1751277 |
| 100 | 1 | 100    | STM1672 |      | putative cy  | 1765644 |
| 100 | 1 | 100    | STM0490 | aes  | acetyl este  | 547873  |
| 100 | 1 | 100    | STM0622 | citE | citrate lyas | 685368  |
| 100 | 1 | 100    | STM3750 | yicJ | putative GF  | 3946906 |
| 100 | 1 | 100    | STM1581 | yddE | putative ph  | 1667447 |
| 100 | 1 | 100    | STM1716 | sohB | putative pe  | 1813085 |
| 100 | 1 | 100    | STM1607 |      | putative ou  | 1697538 |
| 100 | 1 | 100    | STM1561 |      | putative ou  | 1642630 |
| 100 | 0 | 100    | STM1593 | srfA | ssrAB activ  | 1679771 |
| 100 | 1 | 100    | STM1619 |      | cryptic ami  | 1707358 |
| 100 | 1 | 100    | STM1883 | purT | phosphorib   | 1975664 |
| 100 | 1 | 100    | STM1701 | yciW | putative cy  | 1793124 |
| 100 | 1 | 100    | STM1708 | yciM | putative N-  | 1801515 |
| 100 | 1 | 100    | STM2677 | ffh  | 4.5S-RNP     | 2817202 |
| 100 | 1 | 100    | STM3031 |      | ail and omp  | 3193102 |
| 100 | 0 | 63     | STM3082 |      | putative zir | 3243347 |
| 100 | 1 | 100    | STM0433 | thiJ | 4-methyl-5   | 486227  |
| 100 | 1 | 100    | STM0457 | cof  | putative hy  | 514231  |
| 100 | 0 | 69     | STM3599 |      | putative inr | 3771094 |
| 100 | 1 | 100    | STM3050 | yqfB | putative cy  | 3208837 |
| 100 | 1 | 100    | STM3685 | mtlA | PTS family   | 3875267 |
| 100 | 1 | 100    | STM3777 |      | putative cy  | 3978794 |
| 100 | 1 | 100    | STM2976 | fucl | L-fucose is  | 3128220 |
| 100 | 1 | 100    | STM3025 |      | putative cy  | 3185253 |
| 100 | 1 | 100    | STM3142 |      | putative fer | 3306074 |
| 100 | 1 | 100    | STM3603 | treF | cytoplasmic  | 3775574 |
| 100 | 1 | 100    | STM3104 | yggW | putative ox  | 3263114 |

|     |   |        |          |         |              |         |
|-----|---|--------|----------|---------|--------------|---------|
| 100 | 1 | 100    | STM3693  | lldR    | putative tra | 3887564 |
| 100 | 1 | 100    | STM3780  |         | putative fru | 3979830 |
| 100 | 1 | 100    | STM2668  |         | putative cy  | 2809378 |
| 100 | 1 | 100    | STM2160  | yehV    | putative tra | 2256368 |
| 100 | 1 | 100    | STM2082  | rfbP    | LPS side c   | 2160931 |
| 100 | 1 | 100    | STM2114  | wcaB    | putative ac  | 2197480 |
| 100 | 1 | 100    | STM2170  | yohD    | putative De  | 2267357 |
| 100 | 1 | 100    | STM3404  | smg     | putative cy  | 3575235 |
| 100 | 1 | 100    | STM3607  | yhjC    | putative tra | 3780701 |
| 100 | 1 | 100    | STM1811  | ycgN    | putative cy  | 1910420 |
| 100 | 1 | 100    | STM3646  | yiaE    | 2-keto-D-gl  | 3833687 |
| 100 | 1 | 100    | STM3549  |         | putative inr | 3718415 |
| 100 | 1 | 100    | STM3326  | mtgA    | peptidoglyc  | 3488887 |
| 100 | 1 | 100    | STM4480  | yjgQ    | putative pe  | 4723454 |
| 100 | 1 | 100    | STM4322  | yjdC    | putative ba  | 4566770 |
| 100 | 1 | 100    | STM3309  | yrbB    | putative ST  | 3476650 |
| 100 | 1 | 100    | STM3244  | tdcB    | threonine c  | 3411386 |
| 100 | 1 | 100    | STM3146  | hybD    | putative pro | 3308293 |
| 100 | 1 | 100    | STM2835  | srID    | glucitol (so | 2980225 |
| 100 | 0 | 66     | STM2003  |         | pseudogen    | 2083492 |
| 100 | 0 | 100    |          | STM2195 | putative tra | 2292287 |
| 100 | 1 | 100    | STM2198  |         | putative re  | 2295185 |
| 100 | 0 | 62.857 | STM2234  |         | putative tai | 2334834 |
| 100 | 1 | 100    | STM2205  | fruK    | fructose-1-  | 2305286 |
| 100 | 1 | 100    | STM3403  | yrdD    | putative DM  | 3574666 |
| 100 | 1 | 100    | STM3434  | rpsC    | 30S riboso   | 3592442 |
| 100 | 1 | 100    | STM3033  |         | putative nu  | 3195156 |
| 100 | 1 | 100    | STM0874  | mdaA    | oxygen-ins   | 945781  |
| 100 | 1 | 100    | STM3198  |         | putative inr | 3359781 |
| 100 | 1 | 100    | STM3091  | galP    | MFS family   | 3253339 |
| 100 | 1 | 100    | STM1078  |         | putative cy  | 1169910 |
| 100 | 1 | 99     | STM0804  | moaC    | molybdopte   | 872164  |
| 100 | 1 | 100    | STM0850  | yliC    | putative AE  | 921604  |
| 100 | 1 | 100    | STM1091  | sopB    | Salmonella   | 1178231 |
| 100 | 1 | 100    | STM0745  | tolQ    | tol protein, | 813428  |
| 100 | 1 | 100    | STM0794  | bioB    | biotin synth | 860170  |
| 100 | 1 | 100    | STM0841  | ybiU    | putative cy  | 908933  |
| 100 | 1 | 100    | STM3331  | gltD    | glutamate :  | 3498993 |
| 100 | 1 | 100    | STM3757  | misL    | putative au  | 3954761 |
| 100 | 1 | 100    | STM2665  | yfiA    | ribosome a   | 2807668 |
| 100 | 1 | 100    | STM2387  | sixA    | phosphohis   | 2497411 |
| 100 | 1 | 100    | STM4240  | yjbJ    | putative cy  | 4461489 |
| 100 | 1 | 100    | STM3415  | rpoA    | RNA polym    | 3583301 |
| 100 | 1 | 100    | STM1692  | sapA    | ABC super    | 1783678 |
| 100 | 1 | 100    | STM0462  | glnK    | regulatory   | 520524  |
| 100 | 1 | 100    | STM4042A |         | putative br  | 4252841 |
| 100 | 1 | 100    | STM0721  |         | putative gly | 786074  |
| 100 | 1 | 100    | STM4141  |         | putative cy  | 4359853 |
| 100 | 0 | 62.5   | STM2439  | yfeL    | putative me  | 2550981 |
| 100 | 0 | 60     | STM1011  | STM2629 | Gifsy-2 pro  | 1104740 |
| 100 | 0 | 75     | STM4206  |         | putative ph  | 4426919 |
| 100 | 0 | 100    | STM2722  |         | Fels-2 prop  | 2864035 |

|        |   |        |          |          |               |         |
|--------|---|--------|----------|----------|---------------|---------|
| 100    | 1 | 100    | STM1882  | yebG     | DNA dama      | 1975243 |
| 100    | 0 | 99     | STM2713  | aSTM2714 | Fels-2 pro    | 2858895 |
| 100    | 0 | 95     | STM2727  |          | Fels-2 pro    | 2869683 |
| 100    | 1 | 100    | STM4088  | yiiU     | putative cy   | 4297115 |
| 100    | 1 | 100    | STM2931  | ygbQ     | putative Se   | 3071474 |
| 100    | 1 | 99     | STM1376  | lppB     | putative m    | 1459057 |
| 100    | 1 | 100    | STM1367  | ydiH     | putative cy   | 1450027 |
| 100    | 0 | 100    | STM1447  | ydhA     | putative ou   | 1522316 |
| 100    | 1 | 98     | STM1056  |          | Gifsy-2 pro   | 1143523 |
| 100    | 1 | 100    | STM2464  | eutN     | putative de   | 2574812 |
| 100    | 1 | 100    | STM0160  | yacL     | putative cy   | 189603  |
| 100    | 0 | 96     | STM4191  |          | putative cy   | 4414757 |
| 100    | 1 | 99     | STM1856  |          | putative cy   | 1953418 |
| 100    | 1 | 100    | STM1833  |          | putative inr  | 1931276 |
| 100    | 1 | 100    | STM1875  | yobA     | putative ho   | 1969542 |
| 100    | 1 | 100    | STM1869  |          | Homology 1    | 1965507 |
| 100    | 1 | 100    | STM1926  |          | putative cy   | 2022741 |
| 100    | 0 | 63     | PSLT022  | aPSLT021 | pseudogen P   | 16074   |
| 100    | 0 | 61.165 | PSLT095  | traN     | conjugative P | 74623   |
| 100    | 0 | 63.107 | PSLT058  | aPSLT059 | pseudogen P   | 49454   |
| 100    | 0 | 62.264 | PSLT096  | trbE     | conjugative P | 76460   |
| 100    | 0 | 61.765 | PSLT003  | repC     | DNA replic    | P01334  |
| 100    | 0 | 60.396 | PSLT089  | trbI     | conjugative P | 71216   |
| 60.396 | 0 | 60     |          | stbB     |               | R20934  |
| 60.952 | 0 | 60.952 |          | fip      |               | R14184  |
| 45.631 | 0 | 45.631 |          | ccgD     |               | R25466  |
| 56     | 0 | 56     |          | traA     |               | R4537   |
| 59.434 | 0 | 51.961 |          | ORF2     |               | R1729   |
| 63.107 | 0 | 59.259 |          | orfD     |               | R37828  |
| 100    | 0 | 100    | aSTM0637 |          |               |         |
| 100    | 0 | 61.165 | aSTM0657 |          |               |         |
| 100    | 0 | 100    | aSTM0740 |          |               |         |
| 100    | 0 | 58.824 | aSTM2600 |          |               |         |
| 100    | 0 | 60     | STM2614  |          | Gifsy-1 pro   | 2760468 |
| 100    | 0 | 100    | aSTM2646 |          |               |         |
| 78     | 1 | 100    |          |          |               |         |
| 59.223 | 1 | 100    |          |          |               |         |
| 50     | 1 | 100    |          |          |               |         |
| 98     | 0 | 100    |          | aSTM2720 |               |         |
| 80     | 1 | 100    |          |          |               |         |
| 64     | 1 | 100    |          |          |               |         |
| 62.857 | 1 | 100    |          |          |               |         |
| 60.377 | 1 | 100    |          |          |               |         |
| 95     | 1 | 100    |          |          |               |         |
| 94     | 0 | 100    |          |          |               |         |
| 99     | 1 | 100    |          | aSTM3755 |               |         |
| 100    | 1 | 100    |          | aSTM1506 |               |         |
| 61.682 | 1 | 100    |          |          |               |         |
| 56.731 | 1 | 100    |          |          |               |         |
| 88     | 0 | 100    |          |          |               |         |
| 67.327 | 1 | 100    |          |          |               |         |
| 61.111 | 1 | 100    |          |          |               |         |

|        |   |        |          |          |                      |
|--------|---|--------|----------|----------|----------------------|
| 60     | 1 | 100    |          |          |                      |
| 99     | 0 | 100    | aSTM2722 |          |                      |
| 92     | 0 | 100    |          |          |                      |
| 62.5   | 1 | 100    |          |          |                      |
| 97     | 1 | 100    | aSTM0283 |          |                      |
| 62.376 | 1 | 100    |          |          |                      |
| 61.321 | 1 | 100    |          |          |                      |
| 99     | 0 | 100    | aSTM3657 |          |                      |
| 61.538 | 1 | 100    |          |          |                      |
| 53.333 | 1 | 100    |          |          |                      |
| 60.194 | 1 | 100    |          |          |                      |
| 96     | 1 | 100    |          | aPSLT012 |                      |
| 100    | 1 | 100    | aSTM3656 |          |                      |
| 60     | 1 | 100    |          |          |                      |
| 60.577 | 1 | 100    |          |          |                      |
| 98     | 1 | 100    |          | aSTM4312 |                      |
| 95     | 1 | 100    |          |          |                      |
| 97     | 1 | 100    |          |          |                      |
| 62.385 | 1 | 100    |          |          |                      |
| 100    | 1 | 100    | STM3371  | yhdE     | putative int 3541306 |
| 100    | 0 | 64.151 | STM0657  | ybeU     | putative cy 720347   |
| 100    | 1 | 100    | STM0691  |          | putative pe 753852   |
| 100    | 1 | 100    | STM3822  | torA     | trimethylar 4020811  |
| 100    | 0 | 71.569 | STM3171  | ygiK     | putative int 3333115 |
| 100    | 1 | 100    | STM2020  | cbiO     | synthesis c 2101199  |
| 100    | 1 | 100    | STM3834  |          | putative tra 4037940 |
| 100    | 1 | 100    | STM3857  | pstS     | ABC super 4063585    |
| 100    | 1 | 100    | STM3787  | uhpT     | MFS family 3986180   |
| 100    | 0 | 100    | STM0079  | yaaU     | putative MF 92178    |
| 100    | 1 | 100    | STM0129  | murC     | L-alanine a 151143   |
| 100    | 1 | 100    | STM0163  |          | pyridoxine 192411    |
| 100    | 1 | 100    | STM0120  | yabC     | putative S- 140407   |
| 100    | 1 | 100    | STM3345  | rplM     | 50S riboso 3512814   |
| 100    | 1 | 100    | STM3380  | accC     | acetyl CoA 3550576   |
| 100    | 1 | 100    | STM0644  | cobD     | putative arr 705777  |
| 100    | 1 | 100    | STM0665  | gltI     | ABC super 728909     |
| 100    | 1 | 100    | STM0698  | pgm      | phosphogl 759758     |
| 100    | 1 | 100    | STM0227  | fabZ     | (3R)-hydro. 266536   |
| 100    | 1 | 100    | STM1509  | ydfZ     | putative cy 1587602  |
| 100    | 1 | 100    | STM2098  | galF     | putative glt 2178957 |
| 100    | 1 | 100    | STM2125  | yegD     | putative he 2212491  |
| 100    | 1 | 100    | STM0255  | yafB     | 2,5-diketo-l 295069  |
| 100    | 1 | 99     | STM0300  | safB     | putative fir 342829  |
| 100    | 1 | 100    | STM2129  | yegB     | putative MF 2221725  |
| 100    | 1 | 99     | STM2719  |          | Fels-2 prop 2861303  |
| 100    | 0 | 61.165 | STM2751  |          | putative PT 2889739  |
| 100    | 0 | 64.815 | STM2767  |          | putative Su 2908420  |
| 100    | 1 | 100    | STM2795  | ygaU     | putative Ly 2945151  |
| 100    | 0 | 100    | STM1099  | hpaB     | 4-hydroxyp 1185726   |
| 100    | 0 | 62.264 | STM2761  |          | putative inr 2901480 |
| 100    | 0 | 100    | STM2786  |          | tricarboxyli 2934590 |
| 100    | 0 | 98     | STM1089  |          | putative inr 1177543 |

|     |   |        |         |               |               |         |
|-----|---|--------|---------|---------------|---------------|---------|
| 100 | 1 | 100    | STM3419 | rpmJ          | 50S riboso    | 3585879 |
| 100 | 1 | 100    | STM3466 | crp           | catabolite ε  | 3615645 |
| 100 | 1 | 100    | STM3499 | yhgE          | putative inr  | 3654477 |
| 100 | 1 | 100    | STM1094 | pipD          | Pathogenic    | 1180638 |
| 100 | 1 | 100    | STM1127 |               | putative tra  | 1215275 |
| 100 | 1 | 100    | STM1161 | yceP          | putative cyf  | 1247652 |
| 100 | 1 | 100    | STM1207 | ycfM          | putative ou   | 1291153 |
| 100 | 1 | 100    | STM1239 |               | putative cyf  | 1326083 |
| 100 | 1 | 100    | STM1280 | yeaL          | putative inr  | 1357003 |
| 100 | 1 | 100    | STM0980 | cmk           | cytidine mc   | 1064994 |
| 100 | 0 | 63.551 | STM1038 |               | Gifsy-2 pro   | 1124410 |
| 100 | 0 | 70     | STM4211 |               | putative ph   | 4430534 |
| 100 | 1 | 100    | STM4245 | qor           | quinone ox    | 4465543 |
| 100 | 1 | 100    | STM4282 | nrfG          | part of forr  | 4522051 |
| 100 | 1 | 100    | STM2928 | ygbO          | paral putati  | 3069220 |
| 100 | 1 | 100    | STM4223 | yjbF          | putative ou   | 4442531 |
| 100 | 1 | 100    | STM4270 |               | putative tra  | 4509386 |
| 100 | 1 | 100    | STM4306 |               | putative an   | 4554323 |
| 100 | 1 | 100    | STM2378 | fabB          | 3-oxoacyl-[   | 2488622 |
| 100 | 1 | 100    | STM2435 | pdxK          | pyridoxal-p   | 2547554 |
| 100 | 0 | 69     | STM0924 |               | Fels-1 proç   | 994962  |
| 100 | 1 | 100    | STM4034 | fdhE          | putative for  | 4242285 |
| 100 | 0 | 75.248 | STM4208 |               | putative cyf  | 4428341 |
| 100 | 1 | 100    | STM4235 | plsB          | glycerolphc   | 4456181 |
| 100 | 1 | 100    | STM2912 |               | putative tra  | 3054575 |
| 100 | 1 | 100    | STM2950 |               | putative mε   | 3093384 |
| 100 | 0 | 59.048 | STM0902 |               | Fels-1 proç   | 972547  |
| 100 | 1 | 100    | STM1315 | celD          | transcriptio  | 1393977 |
| 100 | 1 | 100    | STM2466 | eutD          | putative ph   | 2575543 |
| 100 | 1 | 100    | STM1232 | purB          | adenylosuc    | 1319487 |
| 100 | 1 | 100    | STM1432 | ydhO          | putative ce   | 1510121 |
| 100 | 0 | 99     | STM1967 |               | putative 50   | 2055502 |
| 100 | 1 | 100    | STM2256 | napB          | periplasmic   | 2354295 |
| 100 | 0 | 58     | STM4424 |               | putative en   | 4666970 |
| 100 | 1 | 100    | STM4447 |               | putative pe   | 4688701 |
| 100 | 1 | 100    | STM2321 | nuol          | NADH deh      | 2430363 |
| 100 | 1 | 100    | STM2348 | yfcF          | putataive g   | 2459626 |
| 100 | 1 | 100    | STM1955 | fliZ          | putative reç  | 2044137 |
| 100 | 0 | 78     | STM0196 | stfC          | putative firr | 231303  |
| 100 | 1 | 100    | STM1927 | yecG          | putative un   | 2022854 |
| 100 | 1 | 100    | STM1307 | astE          | succinylglu   | 1387253 |
| 100 | 1 | 100    | STM1448 | pdxH          | pyridoxine    | 1522704 |
| 100 | 1 | 100    | STM4064 | cdh           | CDP-diacyl    | 4274586 |
| 100 | 1 | 100    | STM2863 | sitC          | Salmonella    | 3008100 |
| 100 | 1 | 100    | STM1452 | ydgR          | putative PC   | 1526450 |
| 100 | 0 | 99     | STM2513 | shdA          | similar to th | 2627589 |
| 100 | 1 | 100    | STM1346 | ydiE          | putative cyf  | 1425050 |
| 100 | 1 | 100    | STM1454 | ydgQ          | putative N/   | 1529192 |
| 100 | 1 | 100    | STM1430 | purR          | transcriptio  | 1507920 |
| 100 | 1 | 100    | STM1371 | sufC          | putative AE   | 1454196 |
| 100 | 0 | 100    |         | STM2869; orgA | putative fla  | 3013788 |
| 100 | 1 | 100    | STM1434 | rnt           | RNase T, c    | 1511702 |

|     |   |        |         |         |              |         |
|-----|---|--------|---------|---------|--------------|---------|
| 100 | 1 | 100    | STM1482 | ydgF    | putative me  | 1560250 |
| 100 | 0 | 86     | STM2088 | rfbX    | LPS side cl  | 2168625 |
| 100 | 1 | 100    | STM3800 | dsdC    | transcriptio | 4001949 |
| 100 | 1 | 100    | STM2647 | ung     | uracil-DNA   | 2786608 |
| 100 | 1 | 100    | STM0397 | phoB    | response r   | 450795  |
| 100 | 1 | 100    | STM0245 | yaeC    | putative ou  | 285523  |
| 100 | 1 | 100    | STM0100 |         | putative cy  | 116816  |
| 100 | 1 | 100    | STM0070 | caiD    | carnitine ra | 81725   |
| 100 | 1 | 100    | STM1950 | sdiA    | transcriptio | 2039658 |
| 100 | 1 | 100    | STM1683 | tyrR    | transcriptio | 1776180 |
| 100 | 1 | 100    | STM3563 | livH    | ABC super    | 3731407 |
| 100 | 1 | 100    | STM1490 |         | putative ch  | 1567098 |
| 100 | 1 | 100    | STM3793 |         | putative su  | 3993591 |
| 100 | 1 | 100    | STM0357 | mod     | DNA methy    | 403331  |
| 100 | 1 | 100    | STM0416 | ribD    | bifunctiona  | 469844  |
| 100 | 1 | 100    | STM4233 | ubiC    | chorismate   | 4454699 |
| 100 | 1 | 100    | STM0097 | polB    | DNA polyr    | 113082  |
| 100 | 1 | 100    | STM3239 | yhaO    | putative H/  | 3403351 |
| 100 | 1 | 100    | STM3481 | trpS    | tryptophan   | 3636247 |
| 100 | 1 | 100    | STM0345 |         | putative inr | 389499  |
| 100 | 1 | 100    | STM2442 | cysW    | ABC super    | 2553717 |
| 100 | 1 | 100    | STM0507 | ybbA    | putative AE  | 566439  |
| 100 | 1 | 100    | STM0605 | ybdN    | putative 3'- | 666642  |
| 100 | 1 | 100    | STM2651 | yfiQ    | putative ac  | 2789880 |
| 100 | 1 | 100    | STM3204 | cca     | tRNA nucle   | 3369221 |
| 100 | 1 | 100    | STM3248 | garR    | tartronate s | 3416453 |
| 100 | 1 | 100    | STM3276 | yhbW    | putative alk | 3442333 |
| 100 | 0 | 60     | STM1043 |         | Gfsy-2 pro   | 1129424 |
| 100 | 1 | 100    | STM1013 | STM2627 | Gfsy-2 pro   | 1105785 |
| 100 | 1 | 100    | STM2529 |         | putative an  | 2662287 |
| 100 | 1 | 100    | STM2547 |         | putative hy  | 2685383 |
| 100 | 1 | 100    | STM0533 | purK    | phosphorib   | 596052  |
| 100 | 0 | 59.615 | STM2599 |         | Gfsy-1 pro   | 2748177 |
| 100 | 1 | 100    | STM4551 |         | putative diç | 4809046 |
| 100 | 1 | 100    | STM3707 | yibD    | putative gly | 3901354 |
| 100 | 1 | 100    | STM2353 | hisQ    | ABC super    | 2463622 |
| 100 | 1 | 100    | STM0012 | dnaK    | chaperone    | 11593   |
| 100 | 1 | 100    | STM1723 | trpE    | anthranilat  | 1818550 |
| 100 | 1 | 100    | STM2809 | proV    | ABC super    | 2955951 |
| 100 | 1 | 100    | STM4051 |         | putative ou  | 4262552 |
| 100 | 1 | 100    | STM0646 | holA    | DNA polym    | 707489  |
| 100 | 1 | 100    | STM2462 | eutJ    | paral putati | 2572547 |
| 100 | 1 | 100    | STM4125 | oxyR    | regulatory j | 4343080 |
| 100 | 1 | 100    | STM0779 | modE    | transcriptio | 844442  |
| 100 | 1 | 100    | STM0770 |         | putative AE  | 834417  |
| 100 | 1 | 100    | STM2806 | nrdI    | stimulates   | 2952099 |
| 100 | 1 | 100    | STM1339 | himA    | integration  | 1419069 |
| 100 | 1 | 100    | STM3379 | accB    | acetylCoA    | 3550095 |
| 100 | 1 | 100    | STM0053 |         | putative tra | 61794   |
| 100 | 1 | 100    | STM0036 |         | putative arj | 41723   |
| 100 | 0 | 97     | STM1245 |         | pseudogen    | 1331488 |
| 100 | 1 | 100    | STM2010 |         | putative cy  | 2092807 |

|     |   |             |      |               |         |
|-----|---|-------------|------|---------------|---------|
| 100 | 1 | 100 STM3868 | atpH | membrane      | 4077988 |
| 100 | 1 | 100 STM2049 | pduN | Propanedic    | 2124929 |
| 100 | 1 | 100 STM4307 |      | putative an   | 4554942 |
| 100 | 1 | 100 STM1909 | argS | arginine tR   | 2002597 |
| 100 | 1 | 100 STM3367 | yhcS | putative tra  | 3533298 |
| 100 | 1 | 100 STM3718 | rfal | UDP-D-gal     | 3913515 |
| 100 | 1 | 100 STM4329 | mopB | chaperone     | 4574774 |
| 100 | 1 | 100 STM1141 | csgE | curli produc  | 1229328 |
| 100 | 1 | 100 STM4025 | yihW | putative gly  | 4235755 |
| 100 | 1 | 100 STM4170 | hupA | DNA-bindir    | 4386709 |
| 100 | 1 | 99 STM2434  |      | putative cyf  | 2547318 |
| 100 | 1 | 100 STM2044 | pduH | Propanedic    | 2122675 |
| 100 | 1 | 100 STM4296 | adi  | arginine de   | 4538697 |
| 100 | 1 | 100 STM3898 | yifE | putative Ly   | 4106500 |
| 100 | 1 | 100 STM1961 | fliS | flagellar bic | 2050820 |
| 100 | 1 | 100 STM1713 | cysB | transcriptio  | 1808407 |
| 100 | 1 | 100 STM4247 | alr  | alanine rac   | 4468038 |
| 100 | 1 | 100 STM3321 | yhbH | putative sig  | 3485866 |
| 100 | 1 | 100 STM0429 | phnS | 2-aminoethr   | 482138  |
| 100 | 1 | 100 STM3976 | yigW | putative hy   | 4182134 |
| 100 | 1 | 100 STM3959 | rhtC | RhtB family   | 4164469 |
| 100 | 1 | 100 STM3942 |      | putative cyf  | 4150114 |
| 100 | 1 | 100 STM4443 |      | putative inr  | 4684978 |
| 100 | 1 | 100 STM0006 | yaaJ | putative AC   | 5966    |
| 100 | 1 | 100 STM1182 | flgJ | flagellar bic | 1264453 |
| 100 | 1 | 100 STM1969 | fliF | flagellar bic | 2056539 |
| 100 | 1 | 100 STM2948 | cysJ | sulfite redu  | 3090711 |
| 100 | 1 | 100 STM3000 | ppdA | prepilin pe   | 3157362 |
| 100 | 1 | 100 STM3022 |      | putative tra  | 3182523 |
| 100 | 1 | 100 STM4089 | menG | putative m    | 4297576 |
| 100 | 1 | 100 STM3972 | aarF | putative re   | 4178658 |
| 100 | 1 | 100 STM1588 | yncC | putative re   | 1676097 |
| 100 | 1 | 100 STM1544 | pqaA | PhoPQ-reg     | 1619783 |
| 100 | 1 | 100 STM1566 | sfcA | NAD-linkec    | 1645811 |
| 100 | 1 | 100 STM1812 | ycgM | putative Fu   | 1910959 |
| 100 | 1 | 100 STM1843 |      | putative tra  | 1938638 |
| 100 | 1 | 100 STM1887 | yebK | putative tra  | 1981484 |
| 100 | 1 | 100 STM1902 | yecD | putative isc  | 1997208 |
| 100 | 1 | 100 STM0506 | tesA | multifunctic  | 565854  |
| 100 | 1 | 100 STM0530 | yIbE | putative cyf  | 593034  |
| 100 | 0 | 100 STM0577 |      | putative tra  | 636379  |
| 100 | 1 | 100 STM1642 | acpD | acyl carrier  | 1735437 |
| 100 | 1 | 100 STM1548 |      | putative S-   | 1624913 |
| 100 | 1 | 100 STM1720 | yciO | putative tra  | 1816780 |
| 100 | 1 | 100 STM1766 | narX | sensory his   | 1864282 |
| 100 | 1 | 100 STM1805 | fadR | negative re   | 1905889 |
| 100 | 1 | 100 STM1850 | yebU | paral putati  | 1948575 |
| 100 | 1 | 99 STM1665  |      | putative cyf  | 1758535 |
| 100 | 1 | 100 STM0481 | priC | primosoma     | 539116  |
| 100 | 1 | 100 STM3166 |      | putative ca   | 3326399 |
| 100 | 1 | 100 STM2690 |      | putative ou   | 2839118 |
| 100 | 1 | 100 STM4530 | yjiA | putative co   | 4786300 |

|     |   |                |          |               |         |
|-----|---|----------------|----------|---------------|---------|
| 100 | 1 | 100 STM0392    | rdgC     | putative ex   | 442929  |
| 100 | 1 | 100 STM3126    |          | putative arr  | 3285412 |
| 100 | 1 | 100 STM2567    | yfhD     | putative pe   | 2712397 |
| 100 | 1 | 100 STM2784    | tctE     | tricarboxyli  | 2932359 |
| 100 | 1 | 100 STM3163    | yqhC     | putative tra  | 3323045 |
| 100 | 0 | 87 STM0840     | ybiV(2)  | putative hy   | 908009  |
| 100 | 1 | 100 STM3803    | yidF     | putative cyf  | 4005857 |
| 100 | 1 | 100 STM2663    | yfiO     | putative lip  | 2806659 |
| 100 | 0 | 99 STM2706     | aSTM2703 | Fels-2 prop   | 2853995 |
| 100 | 1 | 100 STM2814    | emrA     | multidrug r   | 2961778 |
| 100 | 1 | 99 STM2804     |          | putative cyf  | 2951154 |
| 100 | 1 | 100 STM3663    | bax      | gene trans    | 3849391 |
| 100 | 1 | 100 STM3724    | kdtA     | 3-deoxy-D-    | 3919338 |
| 100 | 1 | 100 STM2971    | sdaB     | L-serine de   | 3122119 |
| 100 | 1 | 100 STM2997    | ppdC     | prepilin pe   | 3156099 |
| 100 | 1 | 100 STM2187    | yeiA     | putative dif  | 2282628 |
| 100 | 1 | 100 STM2223    | yejH     | putative AT   | 2324548 |
| 100 | 1 | 100 STM2246    | narP     | response r    | 2346702 |
| 100 | 1 | 100 STM1820    | yeaZ     | putative mc   | 1917765 |
| 100 | 1 | 100 STM3426    | rpsH     | 30S riboso    | 3589414 |
| 100 | 1 | 100 STM0944    | yljA     | putative cyf  | 1022347 |
| 100 | 1 | 100 STM0935    | poxB     | pyruvate de   | 1010107 |
| 100 | 1 | 100 STM3437    | rplB     | 50S riboso    | 3593803 |
| 100 | 1 | 100 STM4345    | yjeM     | putative AF   | 4587298 |
| 100 | 1 | 100 STM4391    | rpsF     | 30S riboso    | 4630514 |
| 100 | 1 | 100 STM3201    | glnE     | adenylyl tra  | 3364040 |
| 100 | 1 | 100 STM3131    |          | putative cyf  | 3290972 |
| 100 | 1 | 100 STM4395    | yifZ     | putative pe   | 4632101 |
| 100 | 1 | 100 STM4510    |          | putative as   | 4764326 |
| 100 | 1 | 100 STM4325    | dcuA     | Dcu family,   | 4569529 |
| 100 | 1 | 100 STM0375    | ampH     | penicillin- b | 428855  |
| 100 | 1 | 100 STM2144    | yegV     | putative su   | 2238540 |
| 100 | 1 | 100 STM2219    | yejF     | putative AT   | 2320155 |
| 100 | 1 | 100 STM2227    | yejL     | putative cyf  | 2328661 |
| 100 | 1 | 100 STM2111    | wcaE     | putative tra  | 2194318 |
| 100 | 1 | 100 STM2169    | yohC     | paral putati  | 2266638 |
| 100 | 1 | 100 STM3687    | mtlR     | repressor f   | 3878549 |
| 100 | 1 | 100 STM3608    | yhjD     | putative tR   | 3781673 |
| 100 | 1 | 100 STM3511    | yhgl     | putative Th   | 3669438 |
| 100 | 1 | 100 STM3236    | yhaK     | putative cyf  | 3401013 |
| 100 | 1 | 100 STM1889    | msbB     | myristoyl tr  | 1983992 |
| 100 | 1 | 100 STM1409    | ssaJ     | Secretion s   | 1490277 |
| 100 | 1 | 100 STM0720    |          | putative gly  | 785165  |
| 100 | 1 | 100 STM0814    | ybhQ     | putative inr  | 879241  |
| 100 | 0 | 61.321 STM0859 |          | putative tra  | 932023  |
| 100 | 1 | 100 STM1062    | uup      | putative AT   | 1152005 |
| 100 | 0 | 60.577 STM0761 |          | fumarate h    | 824918  |
| 100 | 1 | 100 STM0807    | ybhL     | putative pe   | 873389  |
| 100 | 0 | 59.091 STM0854 |          | putative cyf  | 926181  |
| 100 | 1 | 100 STM1383    | ttrA     | Tetrathione   | 1466355 |
| 100 | 1 | 100 STM3230    | yqjE     | putative inr  | 3397106 |
| 100 | 1 | 100 STM4382    | yjfR     | putative Zn   | 4623806 |



|        |   |        |          |                |      |              |         |
|--------|---|--------|----------|----------------|------|--------------|---------|
| 100    | 0 | 54     | STM1867  | STM2585A       | pagK | PhoPQ-act    | 1963179 |
| 100    | 1 | 100    | STM1396  |                | ssaE | Secretion s  | 1483095 |
| 100    | 1 | 100    | STM0379  |                | yaiZ | putative inr | 433302  |
| 100    | 1 | 100    | STM2390  |                | yfcZ | putative cyf | 2501740 |
| 100    | 1 | 98     | STM3471  |                | yhfG | putative cyf | 3620946 |
| 100    | 1 | 100    | STM2022  |                | cbiN | synthesis c  | 2102687 |
| 100    | 1 | 100    | STM0431  |                | phnW | 2-aminoeth   | 484208  |
| 100    | 1 | 100    | STM4393  |                | rpsR | 30S riboso   | 4631235 |
| 100    | 1 | 100    | STM3432  |                | rpmC | 50S riboso   | 3591828 |
| 100    | 1 | 100    | STM4449  |                |      | putative he  | 4691448 |
| 100    | 1 | 100    | STM0349  |                |      | putative ou  | 391990  |
| 100    | 1 | 100    | STM3095  |                | gshB | glutathione  | 3256939 |
| 100    | 1 | 99     | STM1162  |                | dinI | DNA dama     | 1248196 |
| 100    | 1 | 99     | STM2906  |                |      | putative cyf | 3048219 |
| 100    | 0 | 98     | STM3806  |                |      | pseudogen    | 4007176 |
| 100    | 0 | 65     | STM4214  |                |      | putative cyf | 4435381 |
| 100    | 1 | 100    | STM3463  |                | yheU | putative cyf | 3613710 |
| 100    | 1 | 100    | STM0448  |                | clpP | proteolytic  | 503210  |
| 100    | 1 | 100    | STM1243  |                |      | homology v   | 1330832 |
| 100    | 1 | 100    | STM1291  |                | yeaA | putative do  | 1370000 |
| 100    | 1 | 100    | STM1293  |                | pncA | nicotinamic  | 1371115 |
| 100    | 1 | 100    | STM4558  |                | rimI | modificatio  | 4812651 |
| 100    | 1 | 100    | STM3886  |                | rbsR | transcriptio | 4096544 |
| 100    | 1 | 100    | STM1873  |                |      | putative pe  | 1968296 |
| 100    | 1 | 100    | STM4276  |                |      | putative cyf | 4515859 |
| 100    | 1 | 99     | STM0727  |                |      | putative cyf | 793739  |
| 100    | 1 | 100    | STM2161  |                |      | putative inr | 2257159 |
| 100    | 1 | 100    | STM2329  |                |      | putative cyf | 2439893 |
| 100    | 1 | 100    | STM1809  |                |      | putative cyf | 1909566 |
| 100    | 0 | 62.745 | PSLT057  |                |      | putative cyf | P48748  |
| 100    | 0 | 71.845 | PSLT104  |                | traD | conjugative  | P84323  |
| 100    | 0 | 61.765 | PSLT067  |                |      | putative cyf | P54974  |
| 100    | 0 | 79     | PSLT105  | aPSLT106; trbH |      | conjugative  | P86566  |
| 100    | 0 | 60.396 | PSLT043  |                |      | putative ph  | P34155  |
| 100    | 0 | 62.5   | PSLT097  |                | traF | conjugative  | P76687  |
| 51.923 | 0 | 52.941 |          |                | stbC |              | R21652  |
| 59.615 | 0 | 63.393 |          |                | orfD |              | R22202  |
| 58.416 | 0 | 52.885 |          |                | repA |              | R31743  |
| 66.019 | 0 | 62.857 |          |                | traF |              | R11287  |
| 60.784 | 0 | 60.784 |          |                | traB |              | R4853   |
| 82     | 0 | 58.252 |          |                |      |              | R44385  |
| 100    | 0 | 100    | aSTM2560 |                |      |              |         |
| 100    | 1 | 100    | STM0701  |                | speF | ornithine de | 763379  |
| 100    | 0 | 51.429 | aSTM2597 |                |      |              |         |
| 100    | 0 | 100    | aSTM0828 |                |      |              |         |
| 100    | 0 | 59.091 | aSTM0854 |                |      |              |         |
| 100    | 0 | 100    | aSTM0863 |                |      |              |         |
| 63.964 | 1 | 100    |          |                |      |              |         |
| 46.078 | 1 | 100    |          |                |      |              |         |
| 50.495 | 1 | 100    |          |                |      |              |         |
| 58.252 | 0 | 100    |          |                |      |              |         |
| 92     | 0 | 100    |          |                |      |              |         |

|        |   |        |          |          |              |             |         |  |
|--------|---|--------|----------|----------|--------------|-------------|---------|--|
| 63.725 | 1 | 100    |          |          |              |             |         |  |
| 62     | 1 | 100    |          |          |              |             |         |  |
| 98     | 1 | 100    |          | aSTM2132 |              |             |         |  |
| 100    | 0 | 100    |          | aSTM2479 |              |             |         |  |
| 90     | 0 | 100    |          |          |              |             |         |  |
| 98     | 1 | 100    |          |          |              |             |         |  |
| 59.434 | 1 | 100    |          |          |              |             |         |  |
| 100    | 1 | 100    |          | aSTM1995 |              |             |         |  |
| 61.818 | 1 | 100    |          |          |              |             |         |  |
| 57.143 | 1 | 100    |          |          |              |             |         |  |
| 75     | 1 | 100    |          |          |              |             |         |  |
| 59.223 | 1 | 100    |          |          |              |             |         |  |
| 79     | 1 | 100    |          |          |              |             |         |  |
| 46.535 | 1 | 100    |          |          |              |             |         |  |
| 66.019 | 1 | 100    |          |          |              |             |         |  |
| 100    | 0 | 100    | aSTM3690 |          |              |             |         |  |
| 60.377 | 1 | 100    |          |          |              |             |         |  |
| 61.165 | 1 | 100    |          |          |              |             |         |  |
| 52.475 | 1 | 100    |          |          |              |             |         |  |
| 99     | 0 | 100    | aSTM2711 |          |              |             |         |  |
| 62.385 | 1 | 100    |          |          |              |             |         |  |
| 63.208 | 1 | 100    |          |          |              |             |         |  |
| 58.824 | 1 | 100    |          |          |              |             |         |  |
| 60.396 | 1 | 100    |          |          |              |             |         |  |
| 100    | 1 | 100    | STM2712  |          |              | Fels-2 prop | 2858501 |  |
| 59.615 | 1 | 100    |          |          |              |             |         |  |
| 100    | 0 | 100    | aSTM2721 |          |              |             |         |  |
| 87     | 1 | 100    |          |          |              |             |         |  |
| 61     | 1 | 100    |          |          |              |             |         |  |
| 61.321 | 1 | 100    |          |          |              |             |         |  |
| 64.423 | 1 | 100    |          |          |              |             |         |  |
| 100    | 1 | 100    | STM0180  | panD     | aspartate 1  | 211031      |         |  |
| 100    | 1 | 100    | STM0244  | rscF     | regulator in | 285000      |         |  |
| 100    | 0 | 100    | STM1530  |          | putative ou  | 1606415     |         |  |
| 100    | 1 | 100    | STM1718  | btuR     | cob(I)alami  | 1815127     |         |  |
| 100    | 1 | 100    | STM3855  | pstA     | ABC super    | 4061600     |         |  |
| 100    | 1 | 100    | STM3887  | yieO     | putative MF  | 4097508     |         |  |
| 100    | 1 | 100    | STM4580  | nadR     | three acitiv | 4835809     |         |  |
| 100    | 1 | 100    | STM2026  | cbiJ     | synthesis c  | 2105211     |         |  |
| 100    | 1 | 100    | STM3448  | rpsL     | 30S riboso   | 3602335     |         |  |
| 100    | 1 | 100    | STM2451  | hemF     | coproporpt   | 2561205     |         |  |
| 100    | 1 | 100    | STM3319  | yhbG     | putative AE  | 3483637     |         |  |
| 100    | 1 | 100    | STM3358  |          | putative req | 3525927     |         |  |
| 100    | 0 | 100    |          | STM0135  | putative inr | 158199      |         |  |
| 100    | 1 | 100    | STM0168  | yacA     | putative mu  | 196532      |         |  |
| 100    | 1 | 100    | STM0187  | yackK    | regulator fc | 217030      |         |  |
| 100    | 1 | 100    | STM0223  | sfsA     | putative mε  | 260995      |         |  |
| 100    | 1 | 100    | STM1507  | yaeL     | putative tra | 1584546     |         |  |
| 100    | 1 | 100    | STM1538  | ydfJ     | putative hy  | 1611996     |         |  |
| 100    | 0 | 63.107 | STM0656  | ybeS     | putative mc  | 718902      |         |  |
| 100    | 0 | 100    | aSTM0701 |          |              |             |         |  |
| 100    | 0 | 66.337 | STM4538  |          | putative PT  | 4796627     |         |  |

|     |   |        |          |               |              |         |
|-----|---|--------|----------|---------------|--------------|---------|
| 100 | 1 | 100    | STM2138  |               | putative cy  | 2232578 |
| 100 | 0 | 94     | STM2730  |               | Fels-2 pro   | 2872688 |
| 100 | 0 | 63.366 | STM2757  |               | putative cy  | 2894907 |
| 100 | 1 | 100    | STM4578  | serB          | 3-phospho    | 4833224 |
| 100 | 1 | 100    | STM0260  | dniR          | transcriptio | 299923  |
| 100 | 1 | 100    | STM0310  | ghmA          | phosphohe    | 355281  |
| 100 | 0 | 62     | STM0333  |               | putative tra | 376663  |
| 100 | 1 | 100    | STM1072  | yccR          | putative D   | 1163100 |
| 100 | 1 | 100    | STM1492  |               | putative bir | 1569671 |
| 100 | 0 | 61     | STM0327  |               | putative cy  | 370739  |
| 100 | 1 | 100    | STM1059  | ycbW          | putative cy  | 1148137 |
| 100 | 1 | 100    | STM1455  | ydgP          | putative Na  | 1529887 |
| 100 | 1 | 100    | STM1137  | ycdY          | paral putati | 1226849 |
| 100 | 1 | 100    | STM1189  | yceF          | putative inf | 1274491 |
| 100 | 0 | 100    | STM1215  | ycfS          | putative pe  | 1297782 |
| 100 | 1 | 100    | STM1459  |               | putative ox  | 1534348 |
| 100 | 1 | 100    | STM3424  | rplR          | 50S riboso   | 3588505 |
| 100 | 1 | 100    | STM3468  | argD          | acetylornit  | 3618456 |
| 100 | 1 | 100    | STM3505  | feoA          | ferrous iror | 3663890 |
| 100 | 0 | 56     | aSTM3530 |               |              |         |
| 100 | 0 | 62     | STM3558  |               | homology t   | 3727936 |
| 100 | 1 | 100    | STM0992  | mukF          | mukF prote   | 1078202 |
| 100 | 1 | 100    | STM4054  |               | putative dic | 4265227 |
| 100 | 1 | 100    | STM4104  |               | putative 5'  | 4316777 |
| 100 | 1 | 100    | STM4128  | yijD          | putative inr | 4346230 |
| 100 | 1 | 100    | STM2905  |               | putative ac  | 3047619 |
| 100 | 0 | 75     | STM2940  |               | putative cy  | 3080086 |
| 100 | 1 | 100    | STM4117  | yijO          | paral putati | 4332297 |
| 100 | 0 | 55.882 | STM2865  | avrA          | putative inr | 3009898 |
| 100 | 1 | 100    | STM2920  |               | putative tra | 3062607 |
| 100 | 1 | 100    | STM2392  | vacJ          | lipoprotein  | 2503763 |
| 100 | 0 | 66.019 | STM0908  |               | Fels-1 pro   | 977770  |
| 100 | 1 | 100    | STM2493  | perM          | putative Pe  | 2606696 |
| 100 | 1 | 100    | STM4185  | aceK          | isocitrate d | 4405078 |
| 100 | 1 | 100    | STM4100  | metB          | cystathionii | 4309713 |
| 100 | 1 | 100    | STM4120  | argE          | acetylornit  | 4338273 |
| 100 | 0 | 100    | STM2925  | nlpD          | lipoprotein  | 3066549 |
| 100 | 1 | 100    | STM2381  | yfcM          | putative cy  | 2492356 |
| 100 | 1 | 100    | STM2445  | ucpA          | putative ox  | 2556599 |
| 100 | 1 | 100    | STM2241  | STM1051 sspH2 | Leucine-ric  | 2340885 |
| 100 | 1 | 100    | STM1100  | hpaR          | 4-hydroxyp   | 1187506 |
| 100 | 1 | 100    | STM1301  |               | putative mu  | 1380453 |
| 100 | 1 | 100    | STM4350  | orn           | oligoribonu  | 4594797 |
| 100 | 1 | 99     | STM4386  | sgaH          | putative he  | 4627439 |
| 100 | 0 | 62.264 | STM4431  |               | puttive thia | 4674770 |
| 100 | 1 | 100    | STM2260  | napD          | periplasmic  | 2358901 |
| 100 | 0 | 63.725 | STM4483  | idnO          | 5-keto-D-gl  | 4727174 |
| 100 | 1 | 100    | STM4500  | yjhP          | putative SA  | 4753941 |
| 100 | 1 | 100    | STM4533  | tsr           | methyl-acc   | 4790082 |
| 100 | 0 | 100    | STM1221  | cobB          | putative nic | 1306775 |
| 100 | 1 | 100    | STM1440  | sodC          | copper/zinc  | 1516050 |
| 100 | 0 | 100    |          | STM1148; ymdC | putative ph  | 1233491 |

|     |   |        |         |          |              |         |
|-----|---|--------|---------|----------|--------------|---------|
| 100 | 1 | 100    | STM3442 | hopD     | leader pep   | 3596910 |
| 100 | 1 | 100    | STM2469 | eutP     | putative etf | 2578023 |
| 100 | 1 | 100    | STM1223 | potC     | ABC super    | 1308749 |
| 100 | 1 | 100    | STM1326 | pfkB     | 6-phosphol   | 1405090 |
| 100 | 1 | 100    | STM4370 | yjfl     | putative cy  | 4614456 |
| 100 | 1 | 100    | STM1226 | potA     | ABC super    | 1312030 |
| 100 | 1 | 100    | STM0021 | bcfA     | fimbrial sut | 24469   |
| 100 | 1 | 100    | STM1297 | selD     | selenophos   | 1375609 |
| 100 | 1 | 100    | STM1335 | rpml     | 50S riboso   | 1414772 |
| 100 | 1 | 100    | STM1429 | ydhB     | putative tra | 1506991 |
| 100 | 1 | 100    | STM3560 | livF     | ABC super    | 3728654 |
| 100 | 1 | 100    | STM0112 | leuB     | 3-isopropyl  | 131076  |
| 100 | 1 | 100    | STM0689 | citA     | citrate-prot | 751371  |
| 100 | 1 | 100    | STM4231 | lamB     | phage lamB   | 4452079 |
| 100 | 1 | 100    | STM3883 | rbsC     | ABC super    | 4093597 |
| 100 | 1 | 100    | STM0203 | yadQ     | putative Cl  | 238661  |
| 100 | 1 | 100    | STM0452 | cypD     | peptidyl pro | 508668  |
| 100 | 1 | 100    | STM0403 | yajB     | putative cy  | 458885  |
| 100 | 1 | 100    | STM4242 |          | putative ou  | 4462562 |
| 100 | 1 | 100    | STM2372 |          | putative tra | 2484593 |
| 100 | 1 | 100    | STM1324 |          | putative cy  | 1403736 |
| 100 | 0 | 56.311 | STM1355 | ydiP     | putative tra | 1435737 |
| 100 | 1 | 100    | STM1472 |          | putative pe  | 1547817 |
| 100 | 1 | 100    | STM2079 | wzzB     | regulator o  | 2156832 |
| 100 | 1 | 100    | STM3851 | yieG     | putative xa  | 4057734 |
| 100 | 1 | 100    | STM0221 | uppS     | undecaprei   | 259355  |
| 100 | 1 | 100    | STM2060 | yeeA     | putative inr | 2134228 |
| 100 | 1 | 100    | STM0125 | mraY     | phospho-N    | 146315  |
| 100 | 1 | 100    | STM2362 | purF     | amidophos    | 2474336 |
| 100 | 1 | 100    | STM3568 | rpoH     | sigma H (s   | 3735927 |
| 100 | 1 | 100    | STM3282 | pnp      | polynucleo   | 3449247 |
| 100 | 1 | 100    | STM2554 | hcaT     | putative MF  | 2692346 |
| 100 | 0 | 62     | STM1018 | STM2622  | Gifsy-2 pro  | 1108723 |
| 100 | 1 | 100    | STM0226 | lpxD     | UDP-3-O-(    | 265405  |
| 100 | 0 | 62.162 | STM2594 | aSTM1041 | Gifsy-1 pro  | 2743185 |
| 100 | 1 | 100    | STM3736 |          | putative tra | 3928434 |
| 100 | 1 | 100    | STM3627 | dppD     | ABC super    | 3811340 |
| 100 | 1 | 100    | STM3553 | ugpQ     | glyceropho   | 3722759 |
| 100 | 1 | 100    | STM3742 | spoT     | bifunctiona  | 3934070 |
| 100 | 1 | 100    | STM2345 |          | putative tra | 2457383 |
| 100 | 1 | 100    | STM2557 | cadC     | transcriptio | 2696631 |
| 100 | 1 | 99     | STM2438 | yfeK     | putative pe  | 2550588 |
| 100 | 1 | 100    | STM0830 | glnH     | ABC super    | 896264  |
| 100 | 1 | 100    | STM0583 | ybdK     | putative cy  | 639678  |
| 100 | 1 | 100    | STM4465 |          | putative ori | 4707266 |
| 100 | 1 | 100    | STM2643 | srmB     | ATP-deper    | 2782903 |
| 100 | 1 | 100    | STM3195 | ribB     | 3,4 dihydro  | 3357851 |
| 100 | 1 | 100    | STM4248 | tyrB     | tyrosine arr | 4469303 |
| 100 | 1 | 100    | STM2549 | asrB     | anaerobic s  | 2687490 |
| 100 | 1 | 100    | STM2071 | hisG     | ATP phosp    | 2149615 |
| 100 | 1 | 100    | STM0549 | fimZ     | fimbrial pro | 610256  |
| 100 | 1 | 100    | STM4026 | yihX     | paral putati | 4236749 |

|     |   |              |               |              |         |
|-----|---|--------------|---------------|--------------|---------|
| 100 | 1 | 100 STM0880  | potI          | ABC super    | 951678  |
| 100 | 1 | 100 STM0709  | phrB          | deoxyribod   | 774778  |
| 100 | 1 | 100 STM4067  |               | putative AC  | 4277918 |
| 100 | 1 | 100 STM0681  | nagD          | putative ph  | 740893  |
| 100 | 1 | 100 STM0728  | nei           | endonuclea   | 793925  |
| 100 | 1 | 100 STM4105  | metF          | 5,10-methy   | 4318528 |
| 100 | 1 | 100 STM4266  | soxR          | redox-sens   | 4504380 |
| 100 | 0 | 100 aSTM4261 |               |              |         |
| 100 | 1 | 100 STM2556  | hmpA          | dihydropter  | 2695259 |
| 100 | 1 | 100 STM0155  |               | putative ou  | 182720  |
| 100 | 1 | 100 STM4164  | thiC          | 5'-phospho   | 4380491 |
| 100 | 1 | 100 STM4023  | yihU          | putative ox  | 4233764 |
| 100 | 0 | 95 STM4069   |               | putative pe  | 4279841 |
| 100 | 1 | 100 STM2878  | sptP          | protein tyrc | 3022071 |
| 100 | 1 | 100 STM1192  | plsX          | putative fat | 1276153 |
| 100 | 1 | 100 STM1702  | rnb           | RNase II, n  | 1794346 |
| 100 | 1 | 100 STM2662  | rluD          | pseudourid   | 2805547 |
| 100 | 1 | 100 STM0049  | lytB          | regulates tl | 57796   |
| 100 | 1 | 100 STM1024  |               | Gifsy-2 pro  | 1112864 |
| 100 | 1 | 100 STM3775  |               | putative gly | 3975943 |
| 100 | 1 | 100 STM1410  |               | putative cyf | 1491044 |
| 100 | 1 | 100 STM1729  | yciF          | putative cyf | 1825830 |
| 100 | 0 | 92.079       | STM2725       | pseudogen    | 2868690 |
| 100 | 1 | 100 STM0420  | pgpA          | phosphatid   | 472980  |
| 100 | 1 | 100 STM1659  | ogt           | O-6-alkylg   | 1753663 |
| 100 | 1 | 100 STM1760  |               | putative TF  | 1853726 |
| 100 | 1 | 100 STM1825  | yeaB          | putative NT  | 1922537 |
| 100 | 1 | 100 STM1767  | narL          | response r   | 1866071 |
| 100 | 1 | 100 STM2995  | ptr           | protease III | 3149646 |
| 100 | 1 | 100 STM2930  | ispD          | 4-phospho    | 3070745 |
| 100 | 1 | 100 STM2919  | ygbI          | putative re  | 3061824 |
| 100 | 1 | 100 STM1114  | scsB          | Suppressic   | 1200565 |
| 100 | 1 | 100 STM0088  | apaH          | diadenosin   | 101424  |
| 100 | 1 | 100 STM3930  | yifK          | putative AF  | 4139420 |
| 100 | 1 | 100 STM3913  | gppA          | guanosine    | 4121827 |
| 100 | 1 | 100 STM4151  | rplJ          | 50S riboso   | 4364661 |
| 100 | 1 | 100 STM1815  | minD          | cell divisio | 1912818 |
| 100 | 1 | 100 STM1841  |               | putative ou  | 1937220 |
| 100 | 1 | 100 STM1920  | cheW          | purine-binc  | 2016654 |
| 100 | 1 | 100 STM4190  | pepE          | (alpha)-asp  | 4413996 |
| 100 | 1 | 100 STM0432  | phnX          | 2-aminoeth   | 485318  |
| 100 | 1 | 100 STM4043  | yiiL          | putative cyf | 4253496 |
| 100 | 0 | 100 STM3964  | aSTM3963 metR | regulator fc | 4168560 |
| 100 | 0 | 99 STM0610   |               | putative co  | 673151  |
| 100 | 1 | 100 STM1733  |               | putative fer | 1828869 |
| 100 | 1 | 100 STM1577  | narZ          | nitrate red  | 1660688 |
| 100 | 1 | 100 STM1609  | tehA          | TDT family   | 1698945 |
| 100 | 0 | 97 STM1631   | sseJ          | Salmonella   | 1721293 |
| 100 | 1 | 100 STM1670  |               | putative se  | 1763257 |
| 100 | 1 | 100 STM0476  | acrA          | acridine eff | 532419  |
| 100 | 1 | 100 STM1543  |               | putative tra | 1618320 |
| 100 | 1 | 100 STM1527  |               | putative inr | 1604153 |

|     |   |        |         |         |              |         |
|-----|---|--------|---------|---------|--------------|---------|
| 100 | 1 | 100    | STM0979 | ycaL    | putative Zn  | 1064060 |
| 100 | 1 | 100    | STM0615 | ybdR    | putative de  | 678023  |
| 100 | 1 | 100    | STM1740 | yciU    | putative cy  | 1834362 |
| 100 | 0 | 96     | STM1550 |         | putative cy  | 1626565 |
| 100 | 0 | 63.889 | STM1571 | yddG    | putative pe  | 1653824 |
| 100 | 1 | 100    | STM1604 | ydcP    | putative co  | 1693636 |
| 100 | 0 | 100    |         | STM1638 | putative SA  | 1729115 |
| 100 | 0 | 56.19  | STM1896 |         | putative cy  | 1991104 |
| 100 | 1 | 100    | STM1878 | exoX    | DNA exon     | 1971072 |
| 100 | 1 | 100    | STM2973 | fucO    | L-1,2-prop   | 3124504 |
| 100 | 1 | 100    | STM3021 |         | putative inr | 3181899 |
| 100 | 1 | 100    | STM3062 | serA    | D-3-phospl   | 3223279 |
| 100 | 1 | 100    | STM3093 | endA    | DNA-speci    | 3255404 |
| 100 | 1 | 100    | STM0445 | yajG    | putative lip | 500119  |
| 100 | 1 | 100    | STM3581 | yhhS    | putative MF  | 3748223 |
| 100 | 1 | 100    | STM3618 | yhjN    | putative ce  | 3798531 |
| 100 | 1 | 100    | STM3676 | sgbU    | putative 3-l | 3863111 |
| 100 | 1 | 100    | STM3704 | pmgI    | phosphogly   | 3897564 |
| 100 | 1 | 100    | STM2961 | ygcY    | putative d-ç | 3111900 |
| 100 | 1 | 100    | STM2991 | amiC    | N-acetylm    | 3141356 |
| 100 | 1 | 100    | STM3040 | lysS    | lysine tRNA  | 3199219 |
| 100 | 1 | 100    | STM3588 | yhiN    | putative pe  | 3757069 |
| 100 | 1 | 100    | STM2981 | ygdD    | putative srr | 3133858 |
| 100 | 0 | 98     | STM4312 |         | putative ph  | 4560083 |
| 100 | 0 | 60.784 | STM3745 |         | putative cy  | 3938965 |
| 100 | 1 | 100    | STM3177 | ygiX    | putative tra | 3340798 |
| 100 | 1 | 100    | STM3016 | araE    | MFS family   | 3175802 |
| 100 | 1 | 100    | STM2214 | spr     | putative lip | 2313658 |
| 100 | 1 | 100    | STM2096 | rfbD    | TDP-rham     | 2176596 |
| 100 | 1 | 100    | STM2158 | yehT    | putative reç | 2253744 |
| 100 | 1 | 100    | STM0940 | ybjX    | homologue    | 1017515 |
| 100 | 1 | 100    | STM3662 | xylR    | xylose ope   | 3848152 |
| 100 | 1 | 99     | STM4317 |         | putative he  | 4562560 |
| 100 | 1 | 100    | STM3706 | yigQ    | putative pe  | 3900405 |
| 100 | 1 | 100    | STM3596 | yhiR    | putative cy  | 3767646 |
| 100 | 1 | 100    | STM3503 | greB    | transcriptio | 3660551 |
| 100 | 1 | 100    | STM3295 | folP    | 7,8-dihydro  | 3463737 |
| 100 | 1 | 100    | STM4569 | deoB    | phosphope    | 4823708 |
| 100 | 0 | 72     | STM0351 |         | putative ca  | 393893  |
| 100 | 1 | 100    | STM3284 | truB    | tRNA pseu    | 3452044 |
| 100 | 1 | 100    | STM3185 | yqiE    | putative reç | 3347734 |
| 100 | 1 | 100    | STM3107 | yggN    | putative pe  | 3266716 |
| 100 | 1 | 100    | STM2817 | luxS    | quorum se    | 2966270 |
| 100 | 1 | 100    | STM2181 | yohJ    | putative eff | 2277922 |
| 100 | 1 | 100    | STM2220 | yejG    | putative cy  | 2321748 |
| 100 | 1 | 100    | STM2222 | rsuA    | 16S rRNA     | 2323701 |
| 100 | 1 | 100    | STM2154 | mrp     | putative AT  | 2248465 |
| 100 | 1 | 100    | STM2407 | ypeC    | putative pe  | 2523332 |
| 100 | 1 | 100    | STM3425 | rplF    | 50S riboso   | 3588868 |
| 100 | 1 | 100    | STM3472 | ppiA    | peptidyl-pr  | 3621222 |
| 100 | 1 | 100    | STM4363 | hflK    | with HflC, ç | 4606451 |
| 100 | 1 | 100    | STM3762 | cigR    | putative inr | 3960748 |

|        |   |        |                  |          |              |         |
|--------|---|--------|------------------|----------|--------------|---------|
| 100    | 1 | 100    | STM3157          | yghA     | putative ox  | 3318580 |
| 100    | 1 | 100    | STM3060          | ygfE     | putative cy  | 3221727 |
| 100    | 1 | 100    | STM0782          | modB     | ABC super    | 846448  |
| 100    | 1 | 100    | STM0822          | ybiB     | putative tra | 889332  |
| 100    | 1 | 100    | STM2679          | yfjD     | putative m   | 2819585 |
| 100    | 1 | 100    | STM2081          | gnd      | gluconate-t  | 2159361 |
| 100    | 1 | 100    | STM0773          | galM     | galactose-   | 837339  |
| 100    | 1 | 100    | STM0817          | ybhF     | putative AE  | 881958  |
| 100    | 1 | 100    | STM0862          | yliJ     | putative glu | 934627  |
| 100    | 1 | 100    | STM3314          | yrbG     | putative C   | 3479971 |
| 100    | 1 | 100    | STM3222          | ygjQ     | putative int | 3390225 |
| 100    | 0 | 100    | STM4313          |          | putative cy  | 4560360 |
| 100    | 1 | 100    | STM0366          | yahO     | putative pe  | 415676  |
| 100    | 1 | 99     | STM2576          | yfhL     | putative fer | 2721690 |
| 100    | 0 | 61     | STM2635          |          | Gifsy-1 pro  | 2775325 |
| 100    | 1 | 100    | STM4459          | pyrI     | aspartate c  | 4703496 |
| 100    | 1 | 100    | STM0586          | fes      | enterocheli  | 644002  |
| 100    | 1 | 100    | STM4121          | argC     | N-acetyl-g   | 4339513 |
| 100    | 1 | 100    | STM4365          | yjeT     | putative inr | 4608796 |
| 100    | 1 | 100    | STM1388          | orf70    | putative cy  | 1473820 |
| 100    | 0 | 100    | STM3384          | yhdG     | putative TII | 3555271 |
| 100    | 0 | 61.765 | STM4198          |          | putative cy  | 4419382 |
| 100    | 1 | 100    | STM4250          | yjbQ     | putative cy  | 4471525 |
| 100    | 1 | 100    | STM2736          |          | Fels-2 prop  | 2875278 |
| 100    | 1 | 100    | STM2787          |          | tricarboxyli | 2935579 |
| 100    | 1 | 100    | STM3995          | yihD     | putative cy  | 4202850 |
| 100    | 1 | 99     | STM2904          |          | putative AE  | 3047332 |
| 100    | 0 | 70.297 | STM4116          | frwD     | PTS system   | 4331957 |
| 100    | 1 | 100    | STM2932          | ygbE     | putative inr | 3071976 |
| 100    | 1 | 100    | STM1461          | ydgT     | putative cy  | 1535535 |
| 100    | 1 | 100    | STM1503          | ynfB     | putative pe  | 1581306 |
| 100    | 1 | 99     | STM2045          | pduJ     | Propanedic   | 2123044 |
| 100    | 1 | 100    | STM4394          | rplI     | 50S riboso   | 4631504 |
| 100    | 1 | 100    | STM3444          | bfd      | regulatory   | 3597923 |
| 100    | 1 | 100    | STM0307          |          | homology t   | 350943  |
| 100    | 1 | 100    | STM1813          | ycgL     | putative cy  | 1911668 |
| 100    | 0 | 100    | STM1782          | yehH     | putative inr | 1880563 |
| 100    | 1 | 100    | STM1857          |          | putative ac  | 1955007 |
| 100    | 1 | 100    | STM1881          | yebF     | putative pe  | 1974822 |
| 100    | 1 | 100    | STM1839          |          | putative pe  | 1936561 |
| 100    | 1 | 100    | STM2209          |          | putative inr | 2309636 |
| 100    | 0 | 83     | aPSLT066         |          |              |         |
| 100    | 0 | 73     | aPSLT023         | aPSLT024 |              |         |
| 100    | 0 | 60.194 | PSLT079          | traE     | conjugative  | P63346  |
| 100    | 0 | 63.889 | PSLT038          | spvC     | Salmonella   | P27178  |
| 100    | 0 | 62.5   | aPSLT059         | aPSLT058 |              |         |
| 100    | 0 | 77     | aPSLT105 PSLT106 |          | homologue    | P86575  |
| 58     | 0 | 58     |                  | traK     |              | R19577  |
| 63     | 0 | 61.321 |                  | traM     |              | R4194   |
| 64.356 | 0 | 72     |                  | tetA     |              | R42760  |
| 56.19  | 0 | 56.863 |                  | orf80    |              | R26644  |
| 59.615 | 0 | 66.337 |                  | traG     |              | R12486  |

|        |   |                 |          |                      |
|--------|---|-----------------|----------|----------------------|
| 61.386 | 0 | 61.386          | kikA     | R2076                |
| 100    | 0 | 62.5 aSTM0655   |          |                      |
| 100    | 0 | 61.165 STM2590  |          | Gifsy-1 pro 2740856  |
| 100    | 0 | 100 aSTM0741    |          |                      |
| 100    | 0 | 61.468 aSTM2611 |          |                      |
| 100    | 0 | 53.922 aSTM2631 | STM1010  | Gifsy-2 pro 1104268  |
| 100    | 0 | 100 aSTM2670    |          |                      |
| 60.577 | 1 | 100             |          |                      |
| 61.765 | 1 | 100             |          |                      |
| 59.615 | 1 | 100             |          |                      |
| 90     | 1 | 100             |          |                      |
| 76     | 1 | 100             |          |                      |
| 98     | 1 | 100             |          |                      |
| 98     | 0 | 100             | aSTM3911 |                      |
| 59.259 | 1 | 100             |          |                      |
| 89     | 1 | 100             |          |                      |
| 57.282 | 1 | 100             |          |                      |
| 60.748 | 1 | 100             |          |                      |
| 59.406 | 1 | 100             |          |                      |
| 75     | 1 | 100             |          |                      |
| 90     | 1 | 100             |          |                      |
| 78     | 0 | 100             |          |                      |
| 63     | 1 | 100             |          |                      |
| 65.347 | 1 | 100             |          |                      |
| 99     | 1 | 100 aSTM0437    |          |                      |
| 60.952 | 1 | 100             |          |                      |
| 97     | 1 | 100             | aSTM2778 |                      |
| 64.545 | 1 | 100             |          |                      |
| 73     | 1 | 100             |          |                      |
| 62     | 1 | 100             |          |                      |
| 41.748 | 1 | 100             |          |                      |
| 62.376 | 1 | 100             |          |                      |
| 58.252 | 1 | 100             |          |                      |
| 62.376 | 1 | 100             |          |                      |
| 64.151 | 1 | 100             |          |                      |
| 100    | 1 | 100             | aSTM4518 |                      |
| 65     | 1 | 100             |          |                      |
| 56     | 1 | 100             |          |                      |
| 100    | 1 | 100             | aSTM3552 |                      |
| 58.824 | 1 | 100             |          |                      |
| 70.874 | 1 | 100             |          |                      |
| 60.185 | 1 | 100             |          |                      |
| 64.078 | 1 | 100             |          |                      |
| 100    | 1 | 100 STM0190     | mrcB     | transpeptid 220923   |
| 100    | 1 | 100 STM0680     | asnB     | asparagine 738939    |
| 100    | 1 | 100 STM0702     | kdpE     | response r 766339    |
| 100    | 1 | 100 STM3832     |          | putative pe 4035356  |
| 100    | 1 | 100 STM2028     | cbiG     | synthesis c 2106724  |
| 100    | 1 | 100 STM3789     | uhpB     | sensory his 3989052  |
| 100    | 0 | 63.366 STM3845  |          | putative inr 4051378 |
| 100    | 1 | 100 STM3877     | asnA     | asparagine 4085308   |
| 100    | 1 | 100 STM0041     |          | putative gly 48372   |



|     |   |        |          |                   |               |         |
|-----|---|--------|----------|-------------------|---------------|---------|
| 100 | 1 | 100    | STM0116  | ilvI              | acetolactat   | 135898  |
| 100 | 1 | 100    | STM0149  |                   | putative pe   | 171810  |
| 100 | 0 | 76     | STM0175  | stiC              | putativie fir | 205079  |
| 100 | 1 | 100    | STM3328  | arcB              | sensory his   | 3490492 |
| 100 | 1 | 100    | STM3368  | tldD              | suppresses    | 3534350 |
| 100 | 1 | 100    | STM0629  | cspE              | RNA chape     | 692915  |
| 100 | 0 | 65.686 | STM0654  | ybeQ              | putative TF   | 717078  |
| 100 | 1 | 100    | STM0686  | glnS              | glutamine t   | 747421  |
| 100 | 1 | 100    | STM0712  | ybgJ              | putative ca   | 778807  |
| 100 | 1 | 100    | STM0242  | proS              | proline tRN   | 282467  |
| 100 | 1 | 100    | STM1541  |                   | putative re   | 1616470 |
| 100 | 1 | 100    | STM2113  | wcaC              | putative gly  | 2196266 |
| 100 | 1 | 100    | STM4591  | sthE              | putative m    | 4847811 |
| 100 | 0 | 61.111 | STM0278  |                   | putative pe   | 318153  |
| 100 | 1 | 100    | STM0321  | proB              | gamma-glu     | 366315  |
| 100 | 0 | 93     | STM2707  |                   | Fels-2 pro    | 2855566 |
| 100 | 0 | 97     | STM0283  |                   | putative inr  | 322420  |
| 100 | 0 | 67     | STM2759  |                   | putative di   | 2897643 |
| 100 | 1 | 100    | STM2781  | virK              | virulence g   | 2928373 |
| 100 | 1 | 100    | STM1087  | pipA              | Pathogenic    | 1175548 |
| 100 | 1 | 100    | STM1111  | yccD              | putative cy   | 1198694 |
| 100 | 0 | 95     | STM2769  | aSTM0325; aSTM032 | putative tra  | 2910977 |
| 100 | 1 | 100    | STM2798  | ygaP              | putative rh   | 2946350 |
| 100 | 1 | 100    | STM1102  | hpaE              | 4-hydroxyp    | 1189507 |
| 100 | 1 | 100    | STM3453  | fkpA              | FKBP-type     | 3604871 |
| 100 | 1 | 99     | STM3489  | yrfA              | putative inr  | 3644366 |
| 100 | 1 | 100    | STM1236  |                   | putative pe   | 1323222 |
| 100 | 1 | 100    | STM1319  | cedA              | cell divisio  | 1399731 |
| 100 | 1 | 100    | STM1147  |                   | putative AC   | 1233013 |
| 100 | 1 | 100    | STM1197  | fabF              | 3-oxoacyl-[   | 1280435 |
| 100 | 1 | 100    | STM1217  | ycfU              | ABC transp    | 1302568 |
| 100 | 1 | 100    | STM1267  |                   | putative cy   | 1349294 |
| 100 | 1 | 100    | STM3578  | yhhP              | small ubiq    | 3746509 |
| 100 | 0 | 54.808 | STM1030  |                   | Gifsy-2 pro   | 1116367 |
| 100 | 0 | 63.81  | STM4195  |                   | putative Na   | 4416715 |
| 100 | 1 | 100    | STM4221  | pgi               | glucoseph     | 4440162 |
| 100 | 1 | 100    | STM4264  | yjcC              | putative di   | 4502381 |
| 100 | 1 | 100    | STM4297  | melR              | regulator o   | 4541197 |
| 100 | 1 | 100    | STM2376  |                   | putative pe   | 2487283 |
| 100 | 1 | 100    | STM4249  | aphA              | non-specifi   | 4470683 |
| 100 | 1 | 100    | STM4284  | yjcO              | putative TF   | 4524484 |
| 100 | 1 | 100    | STM4326  | aspA              | aspartate a   | 4570945 |
| 100 | 1 | 100    | STM0890  | artI              | ABC super     | 960294  |
| 100 | 0 | 54.369 | STM0916  |                   | Fels-1 pro    | 987126  |
| 100 | 1 | 100    | STM0937  | hcp               | hybrid clus   | 1012963 |
| 100 | 1 | 100    | STM4066  |                   | putative su   | 4276949 |
| 100 | 0 | 79     | STM4217  |                   | putative so   | 4436517 |
| 100 | 0 | 58.333 | STM2902  |                   | putative cy   | 3045697 |
| 100 | 1 | 100    | STM4332  | yjeJ              | putative inr  | 4577402 |
| 100 | 1 | 100    | STM0878  | potG              | ABC super     | 949585  |
| 100 | 0 | 63.366 | aSTM0911 | aSTM0912          |               |         |
| 100 | 1 | 100    | STM0202  | hemL              | glutamate-    | 237211  |

|     |   |        |         |        |               |         |
|-----|---|--------|---------|--------|---------------|---------|
| 100 | 1 | 100    | STM0369 | prpC   | putative cit  | 418987  |
| 100 | 1 | 100    | STM1347 | aroH   | 3-deoxy-D-    | 1425398 |
| 100 | 1 | 100    | STM1935 | ftn    | cytoplasmic   | 2029391 |
| 100 | 1 | 100    | STM1993 | yedJ   | putative hy   | 2075833 |
| 100 | 1 | 100    | STM2271 | rscC   | sensory his   | 2370747 |
| 100 | 0 | 65.686 | STM4433 |        | putative thi  | 4676890 |
| 100 | 1 | 100    | STM2310 | menF   | isochorism    | 2417382 |
| 100 | 1 | 100    | STM2336 |        | putative cy   | 2447144 |
| 100 | 1 | 100    | STM2057 | pduW   | Propanedic    | 2131440 |
| 100 | 1 | 100    | STM2924 | rpoS   | sigma S (si   | 3065494 |
| 100 | 1 | 100    | STM0206 | btuF   | putative co   | 241269  |
| 100 | 0 | 62.745 | STM2636 |        | Gifsy-1 pro   | 2775587 |
| 100 | 1 | 100    | STM1340 | btuC   | ABC super     | 1419571 |
| 100 | 1 | 100    | STM1076 | mgsA   | methylglyo    | 1168524 |
| 100 | 1 | 100    | STM2867 | hilC   | bacterial re  | 3012107 |
| 100 | 1 | 100    | STM4094 | cytR   | transcriptio  | 4302181 |
| 100 | 1 | 100    | STM1945 | pgsA   | phosphatid    | 2035813 |
| 100 | 1 | 100    | STM2898 | invG   | invasion pr   | 3041597 |
| 100 | 1 | 100    | STM1431 | sodB   | superoxide    | 1509413 |
| 100 | 1 | 100    | STM1144 | csgA   | curlin majo   | 1231630 |
| 100 | 1 | 100    | STM3726 | mutM   | formamido     | 3921131 |
| 100 | 1 | 100    | STM3716 | rfaY   | lipopolysac   | 3911766 |
| 100 | 1 | 100    | STM1478 | ydgH   | putative pe   | 1554224 |
| 100 | 1 | 100    | STM1468 | fumA   | fumarase /    | 1542187 |
| 100 | 1 | 100    | STM1498 |        | putative dir  | 1574418 |
| 100 | 1 | 100    | STM3781 |        | putative su   | 3980753 |
| 100 | 1 | 100    | STM0308 | yafV   | putative an   | 351721  |
| 100 | 1 | 100    | STM0363 |        | putative tra  | 411513  |
| 100 | 1 | 100    | STM2013 | yeeO   | putative M/   | 2094377 |
| 100 | 1 | 100    | STM2067 | sbcB   | exonucleas    | 2144261 |
| 100 | 1 | 100    | STM0133 | ftsZ   | tubulin-like  | 155683  |
| 100 | 1 | 100    | STM2323 | nuoG   | NADH deh      | 2431894 |
| 100 | 1 | 100    | STM0317 | gpt    | guanine-hy    | 362679  |
| 100 | 1 | 100    | STM1980 | fliQ   | flagellar bic | 2066073 |
| 100 | 1 | 100    | STM1487 | ynfL   | putative tra  | 1564074 |
| 100 | 1 | 100    | STM3447 | rpsG   | 30S riboso    | 3601769 |
| 100 | 1 | 100    | STM3847 | yidY   | putative MF   | 4054077 |
| 100 | 1 | 100    | STM0387 | yail   | putative cy   | 440205  |
| 100 | 1 | 100    | STM0441 | cyoC   | cytochrome    | 494585  |
| 100 | 1 | 100    | STM4269 | yjcE   | putative CF   | 4507645 |
| 100 | 1 | 100    | STM2312 | elaA   | putative ac   | 2419138 |
| 100 | 1 | 100    | STM3258 |        | Sugar spec    | 3428115 |
| 100 | 0 | 99     | STM4156 |        | putative cy   | 4374607 |
| 100 | 1 | 100    | STM1381 | orf245 | putative cy   | 1464057 |
| 100 | 1 | 100    | STM2512 | xseA   | exonucleas    | 2626079 |
| 100 | 1 | 100    | STM0500 | ybbJ   | putative M    | 560973  |
| 100 | 1 | 100    | STM4413 |        | putative im   | 4653168 |
| 100 | 1 | 100    | STM3190 | ygiE   | putative div  | 3353086 |
| 100 | 1 | 100    | STM3220 | ygiO   | paral putati  | 3388354 |
| 100 | 1 | 100    | STM3265 | yraN   | putative en   | 3435327 |
| 100 | 0 | 61.165 | STM3291 |        | putative cy   | 3460352 |
| 100 | 1 | 100    | STM1773 | ycaA   | putative tra  | 1871299 |

|     |   |                     |          |               |             |         |
|-----|---|---------------------|----------|---------------|-------------|---------|
| 100 | 1 | 100 STM2300         |          | putative cy   | 2408072     |         |
| 100 | 1 | 100 STM2447         |          | putative ou   | 2558622     |         |
| 100 | 1 | 100 STM4471         | miaE     | hydroxylas    | 4713345     |         |
| 100 | 1 | 100 STM2794         | ygaE     | putative tra  | 2944452     |         |
| 100 | 1 | 100 STM4512         | iadA     | isoaspartyl   | 4766093     |         |
| 100 | 1 | 100 STM4595         |          | putative fir  | 4852849     |         |
| 100 | 0 | 100 STM3656         | glyQ     | glycine tRN   | 3841849     |         |
| 100 | 1 | 100 STM1753         | hnr      | Response      | 1848939     |         |
| 100 | 1 | 100 STM1693         | sapB     | ABC super     | 1785324     |         |
| 100 | 1 | 100 STM4048         | rhaS     | positive re   | 4259065     |         |
| 100 | 1 | 100 STM3998         | yihG     | putative en   | 4204835     |         |
| 100 | 1 | 100 STM0813         | ybhP     | putative cy   | 878350      |         |
| 100 | 1 | 100 STM0797         | bioD     | dethiobiotir  | 863096      |         |
| 100 | 1 | 100 STM0089         | apaG     | putative cy   | 102283      |         |
| 100 | 1 | 100 STM4040         | yiiG     | putative cy   | 4250363     |         |
| 100 | 1 | 100 STM0641         | ybeA     | putative cy   | 703955      |         |
| 100 | 1 | 100 STM0261         | gloB     | hydroxyacy    | 301362      |         |
| 100 | 1 | 100 STM0978         | aroA     | 3-enolpyru    | 1062634     |         |
| 100 | 1 | 100 STM2355         | argT     | ABC super     | 2465511     |         |
| 100 | 1 | 100 STM2685         | smpA     | small mem     | 2825074     |         |
| 100 | 1 | 100 STM0059         | citD2    | putative cit  | 69710       |         |
| 100 | 1 | 99 STM0362          |          | putative cy   | 411193      |         |
| 100 | 1 | 100 STM1854         |          | putative inr  | 1951563     |         |
| 100 | 1 | 100 STM3594         | prlC     | oligopeptid   | 3763940     |         |
| 100 | 0 | 100 aSTM0710        |          |               |             |         |
| 100 | 1 | 100 STM4303         | dcuR     | response r    | 4549177     |         |
| 100 | 0 | 100                 | STM1936  | yecH          | putative cy | 2029934 |
| 100 | 1 | 100 STM1684         | ycjF     | putative inr  | 1777869     |         |
| 100 | 1 | 100 STM2637         | rseC     | regulator o   | 2777314     |         |
| 100 | 1 | 100 STM1139         | csgG     | putative tra  | 1228025     |         |
| 100 | 1 | 100 STM2958         | barA     | sensory his   | 3106519     |         |
| 100 | 0 | 95 aSTM2769 STM0324 | aSTM0325 | putative inr  | 369158      |         |
| 100 | 0 | 95 STM4161          |          | putative inv  | 4378924     |         |
| 100 | 1 | 99 STM3460          |          | pseudogen     | 3611808     |         |
| 100 | 1 | 100 STM3297         | ftsJ     | 23S rRNA      | 3466728     |         |
| 100 | 1 | 100 STM2052         | pduQ     | Propanedic    | 2127627     |         |
| 100 | 1 | 100 STM4279         | nrfC     | putative nit  | 4518215     |         |
| 100 | 1 | 99 STM1975          | fliL     | flagellar bic | 2063063     |         |
| 100 | 1 | 100 STM1512         | dcp      | dipeptidyl c  | 1589687     |         |
| 100 | 1 | 100 STM4130         | btuB     | outer mem     | 4348110     |         |
| 100 | 1 | 100 STM0609         | ahpF     | alkyl hydro   | 671254      |         |
| 100 | 1 | 100 STM1744         | oppC     | ABC super     | 1837643     |         |
| 100 | 1 | 100 STM4072         | ydeV     | putative su   | 4280606     |         |
| 100 | 1 | 100 STM3967         | dlhH     | putative die  | 4173793     |         |
| 100 | 1 | 100 STM3951         | uvrD     | DNA-deper     | 4155541     |         |
| 100 | 1 | 100 STM0085         | yabF     | putative N/   | 98255       |         |
| 100 | 1 | 100 STM3059         | ygfB     | putative cy   | 3220982     |         |
| 100 | 1 | 100 STM1971         | fliH     | flagellar bic | 2059202     |         |
| 100 | 1 | 100 STM2430         | cysK     | subunit of c  | 2543231     |         |
| 100 | 1 | 100 STM2432         | ptsI     | General PT    | 2544892     |         |
| 100 | 1 | 100 STM1717         | yciK     | putative ox   | 1814369     |         |
| 100 | 1 | 100 STM2951         | ygcF     | putative Or   | 3096557     |         |

|     |   |        |          |          |      |              |         |
|-----|---|--------|----------|----------|------|--------------|---------|
| 100 | 1 | 100    | STM2949  |          | ptpS | putative sy  | 3092934 |
| 100 | 1 | 100    | STM4013  |          |      | putative m   | 4222099 |
| 100 | 1 | 100    | STM1912  |          | flhE | flagellar pr | 2007820 |
| 100 | 1 | 100    | STM1656  |          |      | putative Zn  | 1750148 |
| 100 | 0 | 100    | STM1554  |          |      | putative co  | 1630405 |
| 100 | 0 | 100    | STM1795  |          |      | putative ho  | 1893531 |
| 100 | 1 | 100    | STM1830  |          | manX | Sugar Spe    | 1928533 |
| 100 | 1 | 100    | STM1853  |          | prpA | serine/thre  | 1950689 |
| 100 | 1 | 100    | STM1900  |          | ntpA | dATP pyro    | 1994556 |
| 100 | 1 | 100    | STM0888  |          | artM | ABC super    | 958903  |
| 100 | 1 | 100    | STM0520  |          |      | putative pe  | 581082  |
| 100 | 1 | 100    | STM0998  |          | aspC | aspartate a  | 1088406 |
| 100 | 1 | 100    | STM0589  |          | fepE | ferric enter | 649596  |
| 100 | 1 | 100    | STM0338  |          | stbC | putative fir | 381035  |
| 100 | 1 | 100    | STM1557  |          |      | putative ar  | 1634745 |
| 100 | 1 | 100    | STM1746  |          | oppA | ABC super    | 1839608 |
| 100 | 1 | 100    | STM1786  |          |      | hydrogena    | 1884828 |
| 100 | 1 | 100    | STM1827  |          |      | putative di  | 1924779 |
| 100 | 1 | 100    | STM1651  |          | nifJ | putative py  | 1742125 |
| 100 | 1 | 100    | STM1678  |          |      | putative 2'- | 1770971 |
| 100 | 1 | 100    | STM0497  |          |      | putative pe  | 556964  |
| 100 | 1 | 100    | STM2984  |          | csdA | putative se  | 3135956 |
| 100 | 0 | 83     | aSTM2703 | aSTM2706 |      |              |         |
| 100 | 1 | 100    | STM0270  |          |      | putative cy  | 309113  |
| 100 | 1 | 100    | STM0408  |          | secF | preprotein   | 464189  |
| 100 | 1 | 100    | STM3148  |          | hybB | putative cy  | 3310487 |
| 100 | 1 | 100    | STM2830  |          | ygaD | putative cy  | 2976000 |
| 100 | 1 | 100    | STM3633  |          |      | putative ba  | 3819242 |
| 100 | 0 | 62.136 | STM4540  |          |      | putative glu | 4798534 |
| 100 | 1 | 100    | STM3737  |          |      | putative Zn  | 3929410 |
| 100 | 0 | 65.686 | STM3170  |          |      | putative inr | 3332622 |
| 100 | 1 | 100    | STM3009  |          | ygeD | putative eff | 3166677 |
| 100 | 1 | 100    | STM3076  |          | tkkA | transketola  | 3236393 |
| 100 | 1 | 100    | STM2845  |          | hycl | protease in  | 2991705 |
| 100 | 1 | 100    | STM3647  |          | yiaF | putative ou  | 3834711 |
| 100 | 1 | 100    | STM3680  |          | aldB | aldehyde d   | 3867973 |
| 100 | 1 | 100    | STM3768  |          |      | putative se  | 3968544 |
| 100 | 1 | 100    | STM2979  |          | fucR | positive re  | 3131996 |
| 100 | 0 | 100    | STM3029  |          | stdA | putative fir | 3191120 |
| 100 | 1 | 100    | STM2200  |          | lysP | APC family   | 2298888 |
| 100 | 0 | 56.731 | STM2235  |          |      | putative ph  | 2335364 |
| 100 | 1 | 100    | STM2208  |          |      | putative inr | 2308969 |
| 100 | 1 | 100    | STM3731  |          | dut  | deoxyuridir  | 3924722 |
| 100 | 1 | 100    | STM3435  |          | rplV | 50S riboso   | 3593161 |
| 100 | 1 | 100    | STM4364  |          | hflC | with HflK, p | 4607713 |
| 100 | 1 | 100    | STM3414  |          | rplQ | 50S riboso   | 3582877 |
| 100 | 1 | 100    | STM0941  |          | ybjY | paral putati | 1018611 |
| 100 | 1 | 100    | STM4366  |          | purA | adenylosuc   | 4609096 |
| 100 | 1 | 100    | STM3247  |          | garK | glycerate k  | 3415210 |
| 100 | 1 | 100    | STM3149  |          | hybA | function un  | 3311655 |
| 100 | 1 | 100    | STM2833  |          | srIE | PTS family   | 2978868 |
| 100 | 1 | 100    | STM4446  |          |      | putative se  | 4687586 |

|     |   |             |          |        |               |         |
|-----|---|-------------|----------|--------|---------------|---------|
| 100 | 1 | 100 STM4579 |          | radA   | putative AT   | 4834276 |
| 100 | 0 | 80 STM0353  |          |        | putative ca   | 398560  |
| 100 | 1 | 100 STM2844 |          |        | putative pe   | 2990869 |
| 100 | 1 | 100 STM2207 |          | setB   | proton efflu  | 2307723 |
| 100 | 1 | 100 STM2090 |          | rfbH   | LPS side c    | 2170926 |
| 100 | 1 | 100 STM2092 |          | rfbF   | LPS side c    | 2173350 |
| 100 | 1 | 100 STM2152 |          | stcA   | paral putati  | 2247097 |
| 100 | 1 | 100 STM1765 |          | narK   | MFS super     | 1862544 |
| 100 | 1 | 100 STM3668 |          | yiaK   | putative m    | 3855639 |
| 100 | 1 | 100 STM3575 |          | yhhN   | putative inr  | 3741737 |
| 100 | 1 | 100 STM3336 |          | nanK   | putative M    | 3504905 |
| 100 | 1 | 100 STM3226 |          | yqjA   | putative De   | 3395194 |
| 100 | 1 | 100 STM1402 |          | sseE   | Secretion s   | 1487057 |
| 100 | 1 | 100 STM1116 |          | scsD   | Suppressic    | 1203061 |
| 100 | 1 | 100 STM0791 |          | hutH   | histidine ar  | 856655  |
| 100 | 1 | 100 STM0837 |          | ybiS   | putative pe   | 903897  |
| 100 | 1 | 100 STM3057 |          | ubiH   | 2-octapren    | 3218465 |
| 100 | 1 | 100 STM1103 |          | hpaD   | 4-hydroxyp    | 1190975 |
| 100 | 1 | 100 STM0787 |          | hutI   | Imidazolon    | 851841  |
| 100 | 1 | 100 STM0827 |          | ybiO   | paral putati  | 892401  |
| 100 | 1 | 100 STM1601 |          | ugtL   | putative m    | 1691246 |
| 100 | 1 | 100 STM3256 |          |        | putative ph   | 3425825 |
| 100 | 1 | 100 STM3187 |          | ygiB   | putative inr  | 3350255 |
| 100 | 1 | 100 STM2470 |          | eutS   | putative ca   | 2578515 |
| 100 | 1 | 100 STM2304 |          | pmrD   | polymyxin I   | 2411318 |
| 100 | 1 | 100 STM3862 |          | glmU   | N-acetyl gli  | 4071053 |
| 100 | 1 | 100 STM0424 |          | xseB   | exonucleas    | 477416  |
| 100 | 1 | 100 STM2805 |          | nrdH   | glutaredoxi   | 2951857 |
| 100 | 1 | 100 STM0454 |          | ybaW   | putative es   | 511166  |
| 100 | 0 | 94 STM3353  | STM0766  | oadG-1 | putative so   | 3521837 |
| 100 | 1 | 100 STM3429 |          | rplX   | 50S riboso    | 3590714 |
| 100 | 1 | 100 STM3431 |          | rpsQ   | 30S riboso    | 3591574 |
| 100 | 1 | 100 STM4402 |          | ytfH   | putative tra  | 4639116 |
| 100 | 1 | 100 STM2153 |          | yehE   | putative ou   | 2247906 |
| 100 | 1 | 97 STM1930  |          |        | pseudogen     | 2025662 |
| 100 | 1 | 99 STM1065  |          | ymbA   | putative ou   | 1156822 |
| 100 | 1 | 100 STM2653 |          | yfiM   | putative ou   | 2794055 |
| 100 | 1 | 100 STM1443 |          | ydhI   | putative inr  | 1519449 |
| 100 | 0 | 100 STM2664 |          |        | pseudogen     | 2807432 |
| 100 | 1 | 100 STM4096 |          | rpmE   | 50S riboso    | 4305763 |
| 100 | 1 | 99 STM4302  |          |        | putative cy   | 4548594 |
| 100 | 1 | 100 STM0449 |          | clpX   | specificity c | 504085  |
| 100 | 1 | 100 STM1728 |          | yciG   | putative cy   | 1825558 |
| 100 | 1 | 100 STM1272 |          | yoaG   | putative cy   | 1351771 |
| 100 | 0 | 98 STM2704  |          |        | Fels-2 prop   | 2852997 |
| 100 | 1 | 100 STM0237 |          | rof    | modulator c   | 280047  |
| 100 | 1 | 100 STM0017 |          |        | putative pro  | 17043   |
| 100 | 0 | 100         | STM2251; | ccmD   | heme expo     | 2351391 |
| 100 | 1 | 100 STM0359 |          |        | putative cy   | 408548  |
| 100 | 1 | 98 STM1093  |          |        | putative cy   | 1180419 |
| 100 | 1 | 100 STM3566 |          |        | putative cy   | 3734285 |
| 100 | 1 | 100 STM1851 |          |        | putative cy   | 1950129 |

|        |   |                 |          |                     |         |
|--------|---|-----------------|----------|---------------------|---------|
| 100    | 0 | 100 STM1829     |          | putative cyl        | 1928048 |
| 100    | 0 | 58 PSLT087      |          | conjugative P67730  |         |
| 100    | 0 | 61.765 PSLT036  |          | putative tra P25877 |         |
| 100    | 0 | 61.111 PSLT088  | traC     | conjugative P68593  |         |
| 100    | 0 | 63.725 PSLT039  | spvB     | Salmonella P28191   |         |
| 100    | 0 | 60.194 PSLT081  | traB     | conjugative P64639  |         |
| 100    | 0 | 62.136 PSLT018  | pefA     | plasmid-en P13569   |         |
| 62.037 | 0 | 62.037          | traJ     |                     | R18046  |
| 62.162 | 0 | 61.321          | traO     |                     | R10403  |
| 62     | 0 | 82              | rec      |                     | R50134  |
| 61.905 | 0 | 61.905          |          |                     | R43854  |
| 62.857 | 0 | 58.416          | ardR     |                     | R26893  |
| 61.538 | 0 | 62              | traC     |                     | R7471   |
| 100    | 0 | 62 aSTM2587     |          |                     |         |
| 100    | 1 | 100 STM0710     | ybgH     | putative PC         | 776238  |
| 100    | 0 | 100 aSTM0760    |          |                     |         |
| 100    | 1 | 100 STM0848     | yliA     | putative AT         | 918101  |
| 100    | 0 | 60.396 aSTM0855 |          |                     |         |
| 100    | 0 | 100 aSTM0891    |          |                     |         |
| 70     | 1 | 100             |          |                     |         |
| 99     | 1 | 100             | aSTM3945 |                     |         |
| 64.486 | 1 | 100             |          |                     |         |
| 100    | 1 | 100             | aSTM2514 |                     |         |
| 100    | 1 | 100             | aSTM2883 |                     |         |
| 71     | 1 | 100             |          |                     |         |
| 62     | 1 | 100             |          |                     |         |
| 57.843 | 1 | 100             |          |                     |         |
| 100    | 0 | 100 aSTM2516    |          |                     |         |
| 86     | 1 | 100             |          |                     |         |
| 50.505 | 1 | 100             |          |                     |         |
| 85     | 1 | 100             |          |                     |         |
| 63.208 | 1 | 100             |          |                     |         |
| 60.396 | 1 | 100             |          |                     |         |
| 94     | 0 | 100             |          |                     |         |
| 61.905 | 1 | 100             |          |                     |         |
| 65.347 | 1 | 100             |          |                     |         |
| 61     | 1 | 100             |          |                     |         |
| 63.107 | 1 | 100             |          |                     |         |
| 100    | 1 | 100             | aSTM3859 |                     |         |
| 61.165 | 1 | 100             |          |                     |         |
| 63.889 | 1 | 100             |          |                     |         |
| 66     | 1 | 100             |          |                     |         |
| 64.762 | 1 | 100             |          |                     |         |
| 63.725 | 1 | 100             |          |                     |         |
| 54.369 | 1 | 100             |          |                     |         |
| 56.604 | 1 | 100             |          |                     |         |
| 68     | 1 | 100             |          |                     |         |
| 99     | 1 | 100             | aSTM2695 |                     |         |
| 67.961 | 1 | 100             |          |                     |         |
| 98     | 1 | 100             | aSTM2704 |                     |         |
| 62.376 | 1 | 100             |          |                     |         |
| 61.538 | 1 | 100             |          |                     |         |

|        |   |        |         |      |                      |
|--------|---|--------|---------|------|----------------------|
| 60.952 | 1 | 100    |         |      |                      |
| 54.286 | 1 | 100    |         |      |                      |
| 86     | 1 | 100    |         |      |                      |
| 100    | 1 | 100    | STM1071 | sulA | suppressor 1162374   |
| 100    | 1 | 100    | STM4227 | malG | ABC super 4446748    |
| 100    | 1 | 100    | STM0142 | hofC | putative co 165127   |
| 100    | 1 | 100    | STM0173 | yadH | putative AE 203104   |
| 100    | 1 | 100    | STM0192 | fhuC | ABC super 225976     |
| 100    | 1 | 100    | STM0246 | yaeE | putative AE 286377   |
| 100    | 1 | 100    | STM3375 | yhdA | putative diç 3544867 |
| 100    | 1 | 100    | STM0652 |      | putative siç 714545  |
| 100    | 1 | 100    | STM0684 | nagB | glucosamir 744131    |
| 100    | 0 | 70.093 | STM3639 | lpfB | long polar f 3826666 |
| 100    | 1 | 100    | STM3839 | rpmH | 50S riboso 4045685   |
| 100    | 1 | 100    | STM3858 |      | putative ph 4064792  |
| 100    | 0 | 44     | STM3637 | lpfD | long polar f 3823018 |
| 100    | 1 | 100    | STM3850 | yieF | putative ox 4057105  |
| 100    | 1 | 100    | STM3884 | rbsB | ABC super 4094587    |
| 100    | 1 | 100    | STM3713 | rfaL | O-antigen I 3908290  |
| 100    | 1 | 100    | STM0225 | hlpA | histone-like 264916  |
| 100    | 1 | 100    | STM0121 | ftsL | cell divisior 141345 |
| 100    | 0 | 87     | STM2765 |      | putative tra 2907066 |
| 100    | 1 | 100    | STM2790 | ygaF | paral putati 2938844 |
| 100    | 1 | 100    | STM1484 |      | putative pro 1560968 |
| 100    | 1 | 100    | STM3439 | rplD | 50S riboso 3594941   |
| 100    | 1 | 100    | STM3480 | yhfL | putative ou 3635932  |
| 100    | 1 | 100    | STM3508 |      | putative cyf 3666938 |
| 100    | 0 | 98     | STM3411 |      | putative cyf 3581638 |
| 100    | 0 | 100    | STM3462 | yheT | putative hy 3612635  |
| 100    | 1 | 100    | STM3498 | yrfl | heat shock 3653483   |
| 100    | 1 | 100    | STM1254 |      | putative ou 1338127  |
| 100    | 1 | 100    | STM1287 |      | arylsulfataç 1365225 |
| 100    | 1 | 100    | STM2118 | wza  | putative po 2201511  |
| 100    | 0 | 58.416 | STM3528 |      | putative pe 3690841  |
| 100    | 1 | 100    | STM3554 | ugpC | ABC super 3723496    |
| 100    | 1 | 100    | STM2120 | asmA | suppressor 2204991   |
| 100    | 1 | 99     | STM2711 |      | Fels-2 proç 2858062  |
| 100    | 1 | 100    | STM0286 |      | putative cyf 327730  |
| 100    | 1 | 100    | STM0313 | dinP | DNA polym 357800     |
| 100    | 1 | 100    | STM2112 | wcaD | putative co 2195077  |
| 100    | 0 | 100    | STM2137 |      | putative cyf 2231496 |
| 100    | 0 | 61.765 | STM2740 |      | Fels-2 proç 2878169  |
| 100    | 0 | 64.078 | STM2756 |      | putative su 2894344  |
| 100    | 0 | 63.107 | STM1048 |      | Gifsy-2 pro 1132792  |
| 100    | 1 | 100    | STM1082 |      | bacterial re 1172746 |
| 100    | 1 | 100    | STM0869 |      | paral putati 941972  |
| 100    | 0 | 61.818 | STM0897 |      | Fels-1 proç 966309   |
| 100    | 0 | 60.194 | STM0914 |      | Fels-1 proç 986133   |
| 100    | 1 | 100    | STM0932 |      | putative nu 1006514  |
| 100    | 1 | 100    | STM2543 | nifS | putative an 2681537  |
| 100    | 0 | 61.386 | STM2585 |      | Gifsy-1 pro 2731356  |
| 100    | 1 | 100    | STM2511 | guaB | IMP dehydi 2624452   |

|     |   |        |         |               |               |         |
|-----|---|--------|---------|---------------|---------------|---------|
| 100 | 1 | 100    | STM0986 | ycaQ          | putative cy   | 1073201 |
| 100 | 0 | 60     | STM1033 |               | Gfsy-2 pro    | 1120666 |
| 100 | 0 | 58     | STM4215 |               | putative cy   | 4435575 |
| 100 | 1 | 100    | STM2851 | hycC          | hydrogena     | 2996547 |
| 100 | 1 | 100    | STM2922 |               | putative 3-p  | 3063775 |
| 100 | 1 | 100    | STM2474 | tktB          | transketola   | 2583500 |
| 100 | 1 | 100    | STM0945 | clpA          | ATP-bindin    | 1022698 |
| 100 | 1 | 100    | STM0989 |               | mukF prote    | 1075621 |
| 100 | 0 | 59.048 | STM1036 |               | Gfsy-2 pro    | 1123434 |
| 100 | 0 | 65.347 | STM4201 |               | putative ph   | 4422192 |
| 100 | 1 | 100    | STM4243 | yjbN          | putative TII  | 4463960 |
| 100 | 1 | 100    | STM4442 |               | putative cy   | 4684653 |
| 100 | 1 | 100    | STM2318 | nuoL          | NADH deh      | 2427661 |
| 100 | 1 | 99     | STM2344 |               | putative ph   | 2456687 |
| 100 | 1 | 100    | STM1117 | agp           | glucose-1-p   | 1203700 |
| 100 | 1 | 100    | STM1259 |               | putative AT   | 1343318 |
| 100 | 1 | 100    | STM1112 | cbpA          | curved DN     | 1198999 |
| 100 | 1 | 100    | STM1067 | fabA          | beta-hydro    | 1157908 |
| 100 | 1 | 100    | STM2516 | sinI          | putative ou   | 2647592 |
| 100 | 1 | 99     | STM0026 | bcfF          | fimbrial sut  | 29994   |
| 100 | 0 | 100    | STM1987 |               | putative inr  | 2069743 |
| 100 | 1 | 100    | STM2066 | sopA          | Secreted e    | 2141570 |
| 100 | 0 | 100    | STM2275 |               | putative re   | 2379349 |
| 100 | 1 | 100    | STM1989 | yedI          | putative inr  | 2071882 |
| 100 | 1 | 100    | STM2069 | yeeY          | putative tra  | 2147471 |
| 100 | 1 | 100    | STM2280 |               | putative pe   | 2385184 |
| 100 | 1 | 100    | STM2314 |               | putative ch   | 2420643 |
| 100 | 1 | 100    | STM2358 |               | putative cy   | 2468648 |
| 100 | 0 | 100    | STM1187 | rluC          | 23S rRNA      | 1272131 |
| 100 | 1 | 100    | STM1174 | flgB          | flagellar bic | 1258247 |
| 100 | 1 | 100    | STM3446 | fusA          | protein cha   | 3599558 |
| 100 | 1 | 100    | STM0340 | stbA          | putative fir  | 384403  |
| 100 | 1 | 100    | STM0162 |               | putative inr  | 191150  |
| 100 | 1 | 100    | STM0442 | cyoB          | cytochrome    | 495189  |
| 100 | 1 | 100    | STM4272 |               | putative inr  | 4510780 |
| 100 | 1 | 100    | STM4182 | metA          | homoserine    | 4400841 |
| 100 | 1 | 100    | STM0139 | yacF          | putative cy   | 162464  |
| 100 | 1 | 100    | STM2301 | pqaB          | putative me   | 2408968 |
| 100 | 0 | 62.963 | STM1361 | ydiM          | putative MF   | 1442952 |
| 100 | 1 | 100    | STM1436 | nemA          | N-ethylmal    | 1512926 |
| 100 | 1 | 100    | STM0399 | brnQ          | LIVCS fam     | 453258  |
| 100 | 0 | 100    |         | STM1411; ssaK | Secretion s   | 1491589 |
| 100 | 1 | 100    | STM4228 | malF          | ABC super     | 4447653 |
| 100 | 1 | 100    | STM0322 | proA          | gamma-glu     | 367430  |
| 100 | 1 | 100    | STM0166 | speE          | spermidine    | 195016  |
| 100 | 1 | 100    | STM2001 | yeel          | putative inr  | 2082351 |
| 100 | 1 | 100    | STM2403 | glk           | glucokinas    | 2517964 |
| 100 | 1 | 100    | STM2307 | menB          | dihydroxyn    | 2413999 |
| 100 | 1 | 100    | STM2295 | yfaO          | putative NT   | 2402597 |
| 100 | 1 | 100    | STM2546 | suhB          | inositol mo   | 2684435 |
| 100 | 1 | 100    | STM4472 | ytgA          | putative inr  | 4714391 |
| 100 | 1 | 100    | STM0535 | lpxH          | UDP-2,3-di    | 597743  |



|     |   |        |          |              |               |         |
|-----|---|--------|----------|--------------|---------------|---------|
| 100 | 0 | 63.725 | STM2592  |              | Gifsy-1 pro   | 2742145 |
| 100 | 0 | 59.406 | STM2602  |              | Gifsy-1 pro   | 2750476 |
| 100 | 1 | 100    | STM4566  | yjlI         | putative cy   | 4819621 |
| 100 | 1 | 100    | STM3700  | gpsA         | glycerol-3-p  | 3895017 |
| 100 | 1 | 100    | STM3610  | yhjG         | putative inr  | 3784414 |
| 100 | 1 | 100    | STM3514  | malP         | maltodextrin  | 3673913 |
| 100 | 1 | 100    | STM2406  |              | putative ox   | 2522220 |
| 100 | 1 | 100    | STM2483  | dapE         | N-succinyl-   | 2597694 |
| 100 | 1 | 100    | STM0959  | lrp          | regulator fc  | 1036742 |
| 100 | 1 | 100    | STM0569  | ybdG         | putative tra  | 625635  |
| 100 | 1 | 100    | STM4437  | yjgA         | putative cy   | 4681180 |
| 100 | 0 | 100    |          | STM4544 dnaT | primosome     | 4803532 |
| 100 | 1 | 100    | STM3734  | rph          | RNase PH      | 3926679 |
| 100 | 1 | 100    | STM3212  | mug          | DNA glycos    | 3378372 |
| 100 | 1 | 100    | STM3255  |              | putative ph   | 3424411 |
| 100 | 1 | 100    | STM3735  | yicC         | putative str  | 3927521 |
| 100 | 0 | 97     | STM4524  | hsdS         | specificity c | 4777606 |
| 100 | 1 | 100    | STM0117  | ilvH         | acetolactat   | 137562  |
| 100 | 1 | 100    | STM2888  | spaR         | surface pre   | 3032590 |
| 100 | 1 | 100    | STM0736  | sucA         | 2-oxoglutar   | 801745  |
| 100 | 1 | 100    | STM4299  | melB         | GPH family    | 4543837 |
| 100 | 1 | 100    | STM2675  | rimM         | 16S rRNA      | 2816073 |
| 100 | 1 | 100    | STM2550  | asrC         | anaerobic s   | 2688319 |
| 100 | 1 | 100    | STM2072  | hisD         | histidinal d  | 2150617 |
| 100 | 1 | 100    | STM0320  | phoE         | outer mem     | 364980  |
| 100 | 1 | 100    | STM0494  | ushA         | UDP-sugar     | 553634  |
| 100 | 1 | 100    | STM1058  | pyrD         | dihydro-orc   | 1146961 |
| 100 | 1 | 99     | STM4319  | phoN         | non-specifi   | 4563589 |
| 100 | 1 | 100    | STM4063  | sbp          | ABC super     | 4273496 |
| 100 | 1 | 100    | STM0668  | ybeY         | putative mε   | 732766  |
| 100 | 1 | 100    | STM0723  |              | putative AE   | 788110  |
| 100 | 1 | 100    | STM2039  | pudB         | Propanedic    | 2117238 |
| 100 | 1 | 100    | STM4309  |              | putative pe   | 4556468 |
| 100 | 1 | 100    | STM1951  | yecC         | putative AE   | 2040612 |
| 100 | 1 | 100    | STM1677  |              | putative tra  | 1769947 |
| 100 | 0 | 100    | aSTM4261 |              |               |         |
| 100 | 1 | 100    | STM0058  | citC2        | putative cit  | 68637   |
| 100 | 0 | 94.34  | STM1268  |              | putative cy   | 1349621 |
| 100 | 1 | 100    | STM4176  | purH         | bifunctiona   | 4392462 |
| 100 | 1 | 100    | STM2536  | pepB         | putative an   | 2676118 |
| 100 | 1 | 100    | STM2042  | pduE         | Propanedic    | 2120322 |
| 100 | 1 | 100    | STM4301  | dcuB         | Dcu family,   | 4547107 |
| 100 | 1 | 100    | STM1931  | araH         | putative int  | 2026132 |
| 100 | 1 | 100    | STM1195  | fabG         | 3-oxoacyl-[   | 1279223 |
| 100 | 1 | 100    | STM1664  |              | putative tra  | 1757889 |
| 100 | 1 | 100    | STM2667  | pheA         | bifunctional: | 2808257 |
| 100 | 1 | 100    | STM0005  | yaaA         | putative cy   | 5114    |
| 100 | 1 | 100    | STM3794  |              | putative re   | 3994836 |
| 100 | 1 | 100    | STM1474  |              | pseudogen     | 1550866 |
| 100 | 1 | 100    | STM4037  | fdoG         | formate de    | 4244758 |
| 100 | 1 | 100    | STM3969  | yigN         | putative inr  | 4175765 |
| 100 | 1 | 100    | STM3936  | hemX         | uroporphyr    | 4143121 |

|     |   |        |         |          |      |               |         |
|-----|---|--------|---------|----------|------|---------------|---------|
| 100 | 1 | 100    | STM3068 |          | fba  | fructose-bi   | 3229511 |
| 100 | 1 | 100    | STM1976 |          | fliM | flagellar bic | 2063535 |
| 100 | 0 | 100    |         | STM2429  | cysZ | required fo   | 2542306 |
| 100 | 1 | 100    | STM1789 |          |      | putative hy   | 1888483 |
| 100 | 1 | 100    | STM3287 |          | nusA | transcriptio  | 3456313 |
| 100 | 1 | 100    | STM2970 |          | sdaC | putative H/   | 3120771 |
| 100 | 1 | 100    | STM4052 |          |      | putative C4   | 4263393 |
| 100 | 1 | 100    | STM3975 |          | tatC | part of sec   | 4181313 |
| 100 | 1 | 100    | STM3958 |          | recQ | ATP-deper     | 4162558 |
| 100 | 1 | 100    | STM3956 |          | yigl | putative pro  | 4160991 |
| 100 | 1 | 100    | STM0489 |          | hemH | ferrochelate  | 546914  |
| 100 | 0 | 100    | STM4146 | aSTM3445 | tufB | protein cha   | 4360603 |
| 100 | 1 | 100    | STM1970 |          | fliG | flagellar bic | 2058214 |
| 100 | 1 | 100    | STM2947 |          | cysI | sulfite redu  | 3088999 |
| 100 | 1 | 100    | STM2999 |          | ppdB | prepilin pe   | 3156808 |
| 100 | 1 | 100    | STM1686 |          | pspE | phage sho     | 1780473 |
| 100 | 1 | 100    | STM0501 |          | ybbK | putative inr  | 561422  |
| 100 | 1 | 100    | STM0526 |          | ylbA | putative gly  | 587927  |
| 100 | 0 | 64.356 | STM0575 |          |      | putative inr  | 635173  |
| 100 | 1 | 100    | STM1636 |          |      | putative AE   | 1726059 |
| 100 | 1 | 100    | STM1711 |          | ribA | GTP cyclot    | 1804109 |
| 100 | 1 | 100    | STM1761 |          | narI | nitrate red   | 1855497 |
| 100 | 1 | 100    | STM1801 |          | ycgO | putative CF   | 1899809 |
| 100 | 1 | 100    | STM1834 |          | yebN | putative Ye   | 1932090 |
| 100 | 1 | 99     | STM1860 |          |      | putative tra  | 1956854 |
| 100 | 1 | 100    | STM1907 |          | cutC | copper hon    | 2001025 |
| 100 | 1 | 100    | STM0491 |          | gsk  | inosine-gua   | 548997  |
| 100 | 1 | 100    | STM1533 |          |      | putative hy   | 1608903 |
| 100 | 1 | 100    | STM1523 |          | yneJ | putative tra  | 1600208 |
| 100 | 1 | 100    | STM0973 |          | pflB | pyruvate fo   | 1055096 |
| 100 | 1 | 100    | STM0621 |          | citF | bifunctiona   | 683829  |
| 100 | 1 | 100    | STM1562 |          |      | putative pe   | 1643558 |
| 100 | 1 | 100    | STM1594 |          | srfB | ssrAB activ   | 1681095 |
| 100 | 1 | 100    | STM3597 |          | gor  | glutathione   | 3768593 |
| 100 | 1 | 100    | STM3631 |          |      | putative xa   | 3816585 |
| 100 | 0 | 61.386 | STM4503 |          |      | putative inr  | 4757441 |
| 100 | 1 | 100    | STM3730 |          | dfp  | flavoproteir  | 3923518 |
| 100 | 1 | 100    | STM2956 |          | relA | (p)ppGpp s    | 3102880 |
| 100 | 1 | 100    | STM2680 |          |      | putative cy   | 2820947 |
| 100 | 0 | 100    | STM0382 |          |      | putative pe   | 435597  |
| 100 | 0 | 100    | STM0437 |          |      | putative pe   | 490256  |
| 100 | 1 | 100    | STM0463 |          | amtB | putative An   | 520894  |
| 100 | 0 | 60.396 | STM3600 |          |      | putative su   | 3772467 |
| 100 | 1 | 100    | STM3660 |          | xylB | xylulokinas   | 3844913 |
| 100 | 0 | 100    | STM3691 |          |      | putative inr  | 3881228 |
| 100 | 1 | 97     | STM4389 |          | yjfY | putative ou   | 4629768 |
| 100 | 1 | 100    | STM0388 |          | aroL | shikimate k   | 440845  |
| 100 | 1 | 100    | STM0421 |          | yajO | putative ox   | 473599  |
| 100 | 0 | 100    |         | STM3161  | metC | cystathionii  | 3320995 |
| 100 | 1 | 100    | STM2847 |          | hycG | hydrogena     | 2992575 |
| 100 | 1 | 100    | STM3664 |          | malS | alpha-amyl    | 3850531 |
| 100 | 1 | 100    | STM3335 |          | yhch | putative cy   | 3504441 |

|     |   |        |         |               |               |         |
|-----|---|--------|---------|---------------|---------------|---------|
| 100 | 1 | 100    | STM3263 | yraL          | putative m    | 3432400 |
| 100 | 1 | 100    | STM3153 | yqhA          | putative m    | 3316274 |
| 100 | 1 | 100    | STM0364 | foxA          | ferrioxamin   | 412663  |
| 100 | 1 | 100    | STM2802 | ygaM          | putative inr  | 2949309 |
| 100 | 1 | 100    | STM2201 | yeiE          | putative tra  | 2300547 |
| 100 | 0 | 100    | STM0373 | yaiU          | flagellar pro | 425165  |
| 100 | 1 | 100    | STM2183 | cdd           | cytidine/de   | 2279166 |
| 100 | 1 | 100    | STM2085 | rfbN          | LPS side c    | 2165293 |
| 100 | 1 | 100    | STM2141 | fbaB          | 3-oxoacyl-[   | 2234965 |
| 100 | 1 | 100    | STM2174 | yohl          | putative nit  | 2270724 |
| 100 | 1 | 100    | STM3417 | rpsK          | 30S riboso    | 3584970 |
| 100 | 1 | 100    | STM2108 | wcaG          | bifunctiona   | 2191635 |
| 100 | 1 | 100    | STM2167 | dld           | D-lactate d   | 2263737 |
| 100 | 1 | 100    | STM0262 | yafS          | putative SA   | 302152  |
| 100 | 1 | 100    | STM3624 | yhjU          | putative inr  | 3806420 |
| 100 | 1 | 100    | STM3546 | yhhY          | putative tra  | 3715617 |
| 100 | 1 | 100    | STM3307 | murA          | UDP-N-ace     | 3474895 |
| 100 | 1 | 99     | STM4385 | ptxA          | putative PT   | 4626961 |
| 100 | 1 | 100    | STM4468 | yjgK          | putative cy   | 4711221 |
| 100 | 1 | 100    | STM4587 | creA          | putative pe   | 4843747 |
| 100 | 1 | 100    | STM3740 | gmk           | guanylate k   | 3933098 |
| 100 | 1 | 100    | STM3298 | yhbY          | putative RM   | 3467442 |
| 100 | 1 | 100    | STM3228 | yqjC          | putative pe   | 3396388 |
| 100 | 1 | 100    | STM3349 | degS          | periplasmic   | 3516877 |
| 100 | 1 | 100    | STM3262 |               | transcriptio  | 3431469 |
| 100 | 1 | 100    | STM3225 | ygjU          | putative dic  | 3393500 |
| 100 | 1 | 100    | STM0628 | pagP          | PhoPQ-act     | 692155  |
| 100 | 1 | 100    | STM0170 | hpt           | hypoxanthi    | 200816  |
| 100 | 1 | 100    | STM0722 |               | putative AE   | 787336  |
| 100 | 1 | 100    | STM4344 | yjeA          | putative py   | 4586095 |
| 100 | 1 | 100    | STM1405 | sseG          | Secretion s   | 1488754 |
| 100 | 1 | 100    | STM1521 | marC          | putative M    | 1598190 |
| 100 | 0 | 62.376 | STM0762 |               | fumarate h    | 825478  |
| 100 | 1 | 100    | STM0808 | ybhM          | putative int  | 874240  |
| 100 | 0 | 59.406 | STM0855 |               | putative ele  | 926614  |
| 100 | 0 | 99     | STM4521 | yjiS          | putative cy   | 4776033 |
| 100 | 0 | 61.765 | STM3117 |               | putative lac  | 3276380 |
| 100 | 1 | 100    | STM0469 | rpmE2         | putative 50   | 526352  |
| 100 | 1 | 100    | STM2965 | yqcC          | putative cy   | 3116326 |
| 100 | 0 | 100    |         | STM3088; yqgC | putative cy   | 3251177 |
| 100 | 0 | 49.074 | STM1866 |               | pseudogen     | 1962089 |
| 100 | 1 | 100    | STM4271 |               | putative inr  | 4510377 |
| 100 | 0 | 79     | STM4216 |               | putative inr  | 4436190 |
| 100 | 1 | 100    | STM4274 | yjch          | putative inr  | 4513154 |
| 100 | 0 | 58.095 | STM1035 |               | Gifsy-2 pro   | 1123154 |
| 100 | 1 | 99     | STM3422 | rpmD          | 50S riboso    | 3587804 |
| 100 | 0 | 60.952 | STM1012 | STM2628       | Gifsy-2 pro   | 1105050 |
| 100 | 1 | 100    | STM4562 |               | putative inr  | 4816607 |
| 100 | 1 | 100    | STM1564 | yddX          | putative cy   | 1645181 |
| 100 | 0 | 100    | STM2717 |               | Fels-2 pro    | 2860542 |
| 100 | 1 | 100    | STM0623 | citD          | citrate lyas  | 686273  |
| 100 | 1 | 100    | STM0953 | infA          | protein cha   | 1030347 |

|        |   |        |          |                  |              |            |
|--------|---|--------|----------|------------------|--------------|------------|
| 100    | 1 | 100    | STM2716  |                  | Fels-2 proç  | 2860323    |
| 100    | 1 | 100    | STM0140  | yacE             | putative nu  | 163207     |
| 100    | 1 | 100    | STM0280  |                  | putative ou  | 319231     |
| 100    | 1 | 100    | STM0181  | panC             | pantothena   | 211506     |
| 100    | 1 | 100    | STM0389  | yaiA             | putative cyf | 441417     |
| 100    | 1 | 100    | STM0020  |                  | putative cyf | 23335      |
| 100    | 1 | 100    | STM3160  |                  | putative inr | 3320736    |
| 100    | 1 | 100    | STM1852  | yebW             | putative inr | 1950479    |
| 100    | 1 | 100    | STM1585  |                  | putative ou  | 1672219    |
| 100    | 1 | 100    | STM0470  | rpmJ2            | putative 50  | 526618     |
| 100    | 1 | 100    | STM1838  | yobF             | putative cyf | 1935769    |
| 100    | 1 | 100    | STM1565  | rpsV             | 30S riboso   | 1645491    |
| 100    | 1 | 100    | STM0780  |                  | putative ou  | 845359     |
| 100    | 0 | 60.784 | PSLT041  | spvR             | Salmonella   | P31427     |
| 100    | 0 | 61     | PSLT098  | traQ             | conjugative  | P77650     |
| 100    | 0 | 53.922 | PSLT083  | trbD             | conjugative  | P66624     |
| 100    | 0 | 63.208 | PSLT103  | traT             | conjugative  | P83215     |
| 100    | 0 | 61.165 | PSLT052  | parA             | plasmid pa   | P43817     |
| 100    | 0 | 66.038 | PSLT092  | traU             | conjugative  | P72228     |
| 62     | 0 | 60.377 |          | nuc              |              | R13481     |
| 62.376 | 0 | 63.366 |          | eex              |              | R8192      |
| 61.111 | 0 | 61.111 |          | korB             |              | R2746      |
| 50.943 | 0 | 55.34  |          | traL             |              | R3160      |
| 70     | 0 | 58     |          | arsB             |              | R47964     |
| 65.347 | 0 | 68     |          | tetR             |              | R42008     |
| 100    | 0 | 83     | STM2703  |                  | Fels-2 proç  | 2851911    |
| 100    | 0 | 64.356 | aSTM0910 |                  |              |            |
| 100    | 0 | 60.377 | STM0912  |                  | Fels-1 proç  | 983263     |
| 100    | 0 | 100    | aSTM2960 |                  |              |            |
| 100    | 0 | 100    | aSTM2971 |                  |              |            |
| 100    | 0 | 61.386 | aSTM0925 | aSTM2589         |              |            |
| 64     | 1 | 100    |          |                  |              |            |
| 64.356 | 1 | 100    |          |                  |              |            |
| 62.376 | 1 | 100    |          |                  |              |            |
| 60.396 | 1 | 100    |          |                  |              |            |
| 67.327 | 1 | 100    |          |                  |              |            |
| 57.692 | 1 | 100    |          |                  |              |            |
| 62.5   | 1 | 100    |          |                  |              |            |
| 61.765 | 1 | 100    |          |                  |              |            |
| 100    | 1 | 100    |          | aSTM1473         |              |            |
| 44     | 1 | 100    |          |                  |              |            |
| 64.078 | 1 | 100    |          |                  |              |            |
| 56     | 1 | 100    |          |                  |              |            |
| 67     | 1 | 100    |          |                  |              |            |
| 60.377 | 1 | 100    |          |                  |              |            |
| 62.136 | 1 | 100    |          |                  |              |            |
| 77     | 0 | 100    |          |                  |              |            |
| 58.416 | 1 | 100    |          |                  |              |            |
| 99     | 0 | 100    | STM0768  | STM3351; STM0054 | dcoB         | Oxalacetat |
| 100    | 0 | 100    |          | aSTM1869         |              | 831919     |
| 61     | 1 | 100    |          |                  |              |            |
| 59     | 0 | 100    |          |                  |              |            |

|        |   |              |
|--------|---|--------------|
| 62.963 | 1 | 100          |
| 56     | 1 | 100          |
| 63.81  | 1 | 100          |
| 59.804 | 1 | 100          |
| 63.81  | 1 | 100          |
| 60.185 | 1 | 100          |
| 86     | 1 | 100          |
| 91     | 1 | 100          |
| 63.107 | 1 | 100          |
| 100    | 0 | 100 aSTM2708 |

0  
0  
0  
0  
0

|     |   |                |
|-----|---|----------------|
| 100 | 1 | 100 STM1780    |
| 100 | 1 | 100 STM0106    |
| 100 | 1 | 100 STM3338    |
| 100 | 1 | 100 STM3372    |
| 100 | 1 | 100 STM0214    |
| 100 | 1 | 100 STM0682    |
| 100 | 0 | 100 STM3390    |
| 100 | 1 | 100 STM0235    |
| 100 | 0 | 100 STM1515    |
| 100 | 1 | 100 STM1964    |
| 100 | 1 | 100 STM3710    |
| 100 | 1 | 100 STM2025    |
| 100 | 1 | 100 STM1963    |
| 100 | 1 | 100 STM2031    |
| 100 | 1 | 100 STM1997    |
| 100 | 1 | 100 STM0046    |
| 100 | 1 | 100 STM0082    |
| 100 | 1 | 100 STM3311    |
| 100 | 0 | 65.421 STM0331 |
| 100 | 1 | 100 STM1066    |
| 100 | 1 | 100 STM1109    |
| 100 | 1 | 100 STM1151    |
| 100 | 1 | 100 STM1200    |
| 100 | 1 | 100 STM1220    |
| 100 | 1 | 100 STM1131    |
| 100 | 1 | 100 STM1185    |
| 100 | 1 | 100 STM1212    |
| 100 | 0 | 67 STM3533     |
| 100 | 1 | 100 STM3572    |
| 100 | 1 | 100 STM4567    |
| 100 | 1 | 100 STM1264    |
| 100 | 1 | 100 STM1289    |
| 100 | 0 | 62 STM4571     |
| 100 | 1 | 100 STM0002    |
| 100 | 0 | 64.815 STM2746 |
| 100 | 0 | 60.784 STM2762 |
| 100 | 1 | 100 STM4549    |

|      |              |         |
|------|--------------|---------|
| prsA | phosphorib   | 1877761 |
| yabJ | putative AE  | 123410  |
| nanT | MFS family   | 3506513 |
| mreD | rod shape-   | 3541908 |
| glnD | uridylyltran | 250143  |
| nagC | transcriptio | 741692  |
| acrE | transmembr   | 3561104 |
| yaeR | putative lac | 278219  |
| ydeI | putative pe  | 1593330 |
| yedD | putative ou  | 2053191 |
| rfaD | ADP-L-glyc   | 3905316 |
| cbiK | synthesis c  | 2104414 |
| amyA | cytoplasmic  | 2051667 |
| cbiE | synthesis c  | 2109085 |
| umuC | error-prone  | 2079892 |
| ileS | isoleucine t | 53855   |
|      | putative se  | 94771   |
| yrbD | putative AE  | 3477600 |
|      | putative fur | 374837  |
| rmf  | ribosome n   | 1157641 |
|      | putative pe  | 1196332 |
| mdoH | membrane     | 1237946 |
| tmk  | thymidylate  | 1283624 |
| ycfX | putative re  | 1305845 |
|      | putative ou  | 1220666 |
| rne  | RNase E      | 1268354 |
| ycfJ | putative ou  | 1295937 |
|      | putative ba  | 3697979 |
| yhhF | putative m   | 3740347 |
| deoC | 2-deoxyrib   | 4821413 |
| aadA | Aminoglycc   | 1346596 |
| yeaD | putative en  | 1367474 |
|      | putative ou  | 4825898 |
| thrA | aspartokin   | 337     |
|      | putative Ex  | 2886073 |
|      | putative inr | 2903614 |
|      | putative cy  | 4807528 |

|     |   |        |         |         |               |         |
|-----|---|--------|---------|---------|---------------|---------|
| 100 | 1 | 100    | STM4589 | creC    | sensory kir   | 4844922 |
| 100 | 0 | 100    | STM0288 |         | putative cy   | 328955  |
| 100 | 0 | 93     | STM2764 |         | putative int  | 2906452 |
| 100 | 1 | 100    | STM2789 |         | putative cy   | 2937832 |
| 100 | 1 | 100    | STM1095 | copS    | Copper res    | 1182280 |
| 100 | 1 | 100    | STM2389 | yfcY    | paral putati  | 2500252 |
| 100 | 1 | 100    | STM2425 | yfeH    | putative Na   | 2537786 |
| 100 | 1 | 100    | STM2478 |         | putative be   | 2587868 |
| 100 | 1 | 100    | STM0950 |         | homologue     | 1027679 |
| 100 | 1 | 100    | STM0981 | rpsA    | 30S riboso    | 1065791 |
| 100 | 1 | 100    | STM1020 | STM2620 | Gfsy-2 pro    | 1109954 |
| 100 | 1 | 100    | STM0955 | aat     | leucyl, phe   | 1030877 |
| 100 | 1 | 100    | STM2564 | yfhK    | putative se   | 2706174 |
| 100 | 1 | 100    | STM4031 |         | putative cy   | 4240092 |
| 100 | 1 | 100    | STM4109 | talC    | putative tra  | 4323818 |
| 100 | 1 | 100    | STM2868 |         | putative cy   | 3013339 |
| 100 | 1 | 100    | STM4327 | fxsA    | suppresses    | 4572683 |
| 100 | 1 | 100    | STM2487 | purC    | phosphorib    | 2602104 |
| 100 | 1 | 100    | STM2535 | sseB    | enhances s    | 2675232 |
| 100 | 1 | 100    | STM2570 |         | putative ph   | 2715207 |
| 100 | 1 | 100    | STM4044 |         | putative iro  | 4253807 |
| 100 | 1 | 100    | STM4086 | glpK    | glycerol kin  | 4294342 |
| 100 | 1 | 100    | STM4122 | argB    | acetylgluta   | 4340525 |
| 100 | 1 | 100    | STM2284 | glpA    | sn-glycerol   | 2390236 |
| 100 | 0 | 59.048 | STM4498 |         | putative inr  | 4751237 |
| 100 | 1 | 100    | STM4526 | hsdR    | endonuclea    | 4780759 |
| 100 | 1 | 100    | STM1922 | motB    | enables fla   | 2019198 |
| 100 | 1 | 100    | STM1323 | yniB    | putative re   | 1403157 |
| 100 | 1 | 100    | STM0370 | prpD    | putative pro  | 420196  |
| 100 | 1 | 100    | STM4237 | lexA    | SOS respo     | 4459249 |
| 100 | 1 | 100    | STM2861 | sitA    | Salmonella    | 3006368 |
| 100 | 1 | 100    | STM1445 | slyB    | putative ou   | 1520368 |
| 100 | 1 | 100    | STM4398 | cycA    | APC family    | 4634848 |
| 100 | 0 | 59.223 | STM4425 |         | putative de   | 4667909 |
| 100 | 1 | 100    | STM4448 |         | putative ph   | 4689457 |
| 100 | 1 | 100    | STM4403 | cpdB    | 2':3'-cyclic- | 4639560 |
| 100 | 0 | 65.385 | STM4427 |         | putative en   | 4670360 |
| 100 | 1 | 100    | STM4454 | treB    | pseudogen     | 4696802 |
| 100 | 0 | 64     | STM4495 |         | putative typ  | 4743262 |
| 100 | 0 | 61.386 | STM4536 |         | putative PT   | 4795371 |
| 100 | 1 | 100    | STM1256 |         | putative AE   | 1340757 |
| 100 | 1 | 100    | STM1493 |         | putative pe   | 1570328 |
| 100 | 1 | 100    | STM3801 | dsdX    | putative Gr   | 4003098 |
| 100 | 1 | 100    | STM3826 | torS    | sensory kir   | 4026452 |
| 100 | 1 | 100    | STM0360 |         | cytochrom     | 408766  |
| 100 | 1 | 100    | STM0077 | fixC    | related to c  | 90461   |
| 100 | 1 | 100    | STM0151 | pdhR    | transcriptio  | 175316  |
| 100 | 1 | 100    | STM4238 | dinF    | DNA-dama      | 4460035 |
| 100 | 1 | 100    | STM2330 | lrhA    | NADH deh      | 2440125 |
| 100 | 1 | 100    | STM1342 | btuD    | ABC super     | 1421194 |
| 100 | 1 | 100    | STM0865 | ybjG    | putative pe   | 937574  |
| 100 | 1 | 100    | STM1458 | ydgM    | putative alt  | 1533770 |

|     |   |                |       |               |         |
|-----|---|----------------|-------|---------------|---------|
| 100 | 1 | 100 STM1499    |       | putative dir  | 1576952 |
| 100 | 1 | 100 STM1501    | ynfC  | putative inr  | 1579950 |
| 100 | 1 | 100 STM3791    |       | putative cy   | 3991219 |
| 100 | 1 | 100 STM2574    |       | putative pe   | 2719414 |
| 100 | 1 | 100 STM0404    | queA  | S-adenosyl    | 459560  |
| 100 | 1 | 100 STM4192    |       | putative cy   | 4414893 |
| 100 | 1 | 100 STM2368    | truA  | pseudourid    | 2480462 |
| 100 | 0 | 100 STM0347    |       | putative res  | 391056  |
| 100 | 1 | 100 STM2527    |       | putative po   | 2660622 |
| 100 | 1 | 100 STM0460    | mdlA  | putative AE   | 516766  |
| 100 | 1 | 100 STM0566    |       | putative inr  | 622059  |
| 100 | 1 | 99 STM1329     |       | putative inr  | 1408220 |
| 100 | 1 | 100 STM4408    | msrA  | peptide me    | 4645202 |
| 100 | 1 | 100 STM4476    | holC  | DNA polym     | 4719868 |
| 100 | 1 | 100 STM2648    | yfiF  | putative tR   | 2787413 |
| 100 | 1 | 100 STM3199    | yqiK  | paral putati  | 3360420 |
| 100 | 1 | 100 STM3241    | tdcE  | pyruvate fo   | 3406432 |
| 100 | 1 | 100 STM3274    | yhbU  | putative pro  | 3440273 |
| 100 | 1 | 100 STM4099    | metJ  | transcriptio  | 4309131 |
| 100 | 0 | 100 STM1380    | orf32 | putative hy   | 1463105 |
| 100 | 1 | 100 STM0471    | ylaC  | putative inr  | 526814  |
| 100 | 1 | 100 STM2791    | gabD  | succinate-s   | 2940134 |
| 100 | 0 | 64.706 STM2605 |       | Gifsy-1 pro   | 2752336 |
| 100 | 1 | 100 STM2639    | rseA  | anti sigma    | 2778746 |
| 100 | 0 | 100 STM3191    |       | putative arj  | 3354502 |
| 100 | 1 | 100 STM3619    | yhjO  | glycosyltra   | 3800842 |
| 100 | 1 | 100 STM3269    | yhbO  | putative int  | 3437752 |
| 100 | 1 | 100 STM1419    | yscR  | Secretion s   | 1498744 |
| 100 | 1 | 100 STM2499    | purM  | phosphorib    | 2613073 |
| 100 | 1 | 100 STM1125    | putP  | SSS family    | 1211980 |
| 100 | 1 | 100 STM2808    | nrdF  | ribonucleos   | 2954637 |
| 100 | 1 | 100 STM0271    |       | putative cy   | 309924  |
| 100 | 1 | 100 STM2882    | sipA  | cell invasio  | 3024679 |
| 100 | 1 | 100 STM3501    | envZ  | sensory his   | 3658257 |
| 100 | 1 | 100 STM1694    | sapC  | ABC super     | 1786276 |
| 100 | 1 | 100 STM4047    | rhaB  | rhamnuloki    | 4257308 |
| 100 | 1 | 100 STM0550    | fimY  | putative req  | 611492  |
| 100 | 1 | 100 STM1224    | sifA  | lysosomal     | 1309844 |
| 100 | 1 | 100 STM1163    | pyrC  | dihydro-orc   | 1248515 |
| 100 | 1 | 100 STM3470    | fic   | putative ce   | 3620354 |
| 100 | 1 | 100 STM4038    | fdhD  | putative for  | 4248003 |
| 100 | 1 | 100 STM0640    | mrda  | cell elonga   | 702023  |
| 100 | 1 | 100 STM0256    | yafC  | putative tra  | 295893  |
| 100 | 0 | 100 STM1457    |       | putative res  | 1531570 |
| 100 | 1 | 100 STM2884    | sipC  | cell invasio  | 3027857 |
| 100 | 1 | 100 STM1171    | flgN  | flagellar bic | 1256619 |
| 100 | 1 | 100 STM4254    | uvrA  | UvrA with l   | 4473213 |
| 100 | 1 | 100 STM2688    | smpB  | small prote   | 2826484 |
| 100 | 1 | 100 STM0035    |       | putative arj  | 40131   |
| 100 | 1 | 100 STM4139    | coaA  | pantothena    | 4358694 |
| 100 | 1 | 98 STM3688     |       | putative cy   | 3879149 |
| 100 | 1 | 100 STM3865    | atpD  | membrane      | 4074111 |

|     |   |                |      |              |         |
|-----|---|----------------|------|--------------|---------|
| 100 | 1 | 100 STM0395    | sbcC | ATP-deper    | 446241  |
| 100 | 1 | 100 STM2889    | spaQ | surface pre  | 3033385 |
| 100 | 1 | 100 STM2064    | phsB | Hydrogen s   | 2138082 |
| 100 | 1 | 100 STM1917    | cheB | methyl este  | 2012690 |
| 100 | 1 | 100 STM1709    | yciS | putative inr | 1802691 |
| 100 | 1 | 100 STM1391    | ssrB | Secretion s  | 1476167 |
| 100 | 1 | 100 STM3722    | rfaG | glucosyltra  | 3916738 |
| 100 | 1 | 100 STM0348    |      | putative inr | 391708  |
| 100 | 0 | 99 STM4162     | thiF | catalyzes tl | 4379105 |
| 100 | 1 | 100 STM3986    | trkH | Trk family,  | 4193673 |
| 100 | 1 | 100 STM2522    | hisS | histidine tR | 2654871 |
| 100 | 1 | 100 STM3924    | wecD | lipopolysac  | 4133110 |
| 100 | 1 | 100 STM3905    | ilvA | threonine c  | 4113840 |
| 100 | 1 | 100 STM1762    | narJ | nitrate redu | 1856174 |
| 100 | 1 | 100 STM1791    |      | putative hy  | 1889470 |
| 100 | 1 | 100 STM1735    | yciB | putative int | 1830099 |
| 100 | 1 | 100 STM0145    | nadC | quinolinate  | 168373  |
| 100 | 1 | 100 STM0426    | phnV | 2-aminoeth   | 479360  |
| 100 | 1 | 100 STM4035    | fdol | formate de   | 4243211 |
| 100 | 1 | 100 STM1395    | ssaD | Secretion s  | 1481876 |
| 100 | 1 | 99 STM0547     | fimH | minor fimb   | 608675  |
| 100 | 1 | 100 STM3948    | yigA | putative cy  | 4153083 |
| 100 | 1 | 100 STM3909    | ilvC | ketol-acid r | 4117377 |
| 100 | 1 | 100 STM0184    | pcnB | poly(A) pol  | 213874  |
| 100 | 1 | 100 STM1831    | manY | Sugar Spe    | 1929554 |
| 100 | 1 | 100 STM1784    | ychF | putative G   | 1881818 |
| 100 | 1 | 100 STM2896    | invA | invasion pr  | 3038400 |
| 100 | 1 | 100 STM0474    | ybaJ | putative cy  | 528377  |
| 100 | 1 | 100 STM1539    |      | putative hy  | 1613801 |
| 100 | 1 | 100 STM1516    | ydeE | putative MF  | 1594414 |
| 100 | 1 | 100 STM0966    | dmsC | anaerobic c  | 1048395 |
| 100 | 1 | 100 STM0611    |      | putative ox  | 673704  |
| 100 | 0 | 100 STM1546    |      | putative mc  | 1622640 |
| 100 | 0 | 83 STM1569     | fdnH | formate de   | 1649544 |
| 100 | 1 | 100 STM1602    | sifB | Salmonella   | 1692181 |
| 100 | 0 | 84 STM1626     | trg  | methyl-acc   | 1715879 |
| 100 | 1 | 100 STM1648    | hslJ | heat shock   | 1741129 |
| 100 | 1 | 100 STM1697    |      | putative Di  | 1789095 |
| 100 | 1 | 100 STM0508    | ybbP | putative inr | 567122  |
| 100 | 1 | 100 STM0511    | sfbB | putative AE  | 571979  |
| 100 | 1 | 100 STM0536    | ppiB | peptidyl-pro | 598468  |
| 100 | 1 | 100 STM0595    | entC | isochorism   | 656255  |
| 100 | 1 | 100 STM2710    |      | Fels-2 prop  | 2857415 |
| 100 | 1 | 100 STM1768    | ychP | putative inv | 1866722 |
| 100 | 1 | 100 STM1806    | nhaB | NhaB famil   | 1906828 |
| 100 | 0 | 100 STM2729    |      | Fels-2 prop  | 2870268 |
| 100 | 1 | 100 STM3012    |      | putative tra | 3171663 |
| 100 | 1 | 100 STM3683    | selA | selenocyst   | 3872693 |
| 100 | 1 | 100 STM3752    |      | putative cy  | 3948987 |
| 100 | 1 | 100 STM3168    | ygiR | putative Fe  | 3328938 |
| 100 | 1 | 100 STM3005    | mutH | methyl-dire  | 3163381 |
| 100 | 0 | 61.765 STM3085 |      | putative ou  | 3248052 |



|     |   |        |         |               |               |         |
|-----|---|--------|---------|---------------|---------------|---------|
| 100 | 1 | 100    | STM3137 |               | putative urc  | 3298907 |
| 100 | 1 | 100    | STM2810 | proW          | ABC super     | 2957146 |
| 100 | 1 | 100    | STM2800 |               | putative inr  | 2948325 |
| 100 | 1 | 100    | STM3382 | panF          | SSS family    | 3552266 |
| 100 | 0 | 59.223 | STM1040 |               | Gifsy-2 pro   | 1125600 |
| 100 | 1 | 100    | STM3055 | gcvT          | glycine clea  | 3215588 |
| 100 | 0 | 100    | STM3089 | yqgD          | putative inr  | 3251338 |
| 100 | 1 | 100    | STM3124 |               | putative re   | 3284090 |
| 100 | 1 | 100    | STM0468 | ylaB          | putative di   | 524577  |
| 100 | 1 | 100    | STM3609 | yhjE          | putative MF   | 3783052 |
| 100 | 0 | 60.784 | STM4429 |               | putative cyf  | 4672417 |
| 100 | 1 | 100    | STM4387 | sgaU          | putative he   | 4628099 |
| 100 | 1 | 100    | STM4474 | yjgN          | putative inr  | 4715684 |
| 100 | 1 | 100    | STM4590 | creD          | tolerance tr  | 4846404 |
| 100 | 1 | 100    | STM2841 | ygbD          | putative ox   | 2986507 |
| 100 | 1 | 100    | STM2180 |               | putative tra  | 2276882 |
| 100 | 1 | 100    | STM2083 | rfbK          | LPS side c    | 2162433 |
| 100 | 1 | 100    | STM2801 | ygaC          | putative cyf  | 2948809 |
| 100 | 1 | 100    | STM2193 | folE          | GTP cyclot    | 2290444 |
| 100 | 1 | 100    | STM2103 | wcaJ          | putative UI   | 2185572 |
| 100 | 1 | 100    | STM2176 |               | putative glu  | 2272979 |
| 100 | 1 | 100    | STM1799 | emtA          | membrane      | 1898016 |
| 100 | 1 | 100    | STM3674 | lyxK          | L-xylulose l  | 3860963 |
| 100 | 0 | 60.396 | STM2240 |               | putative cyf  | 2339567 |
| 100 | 1 | 100    | STM1842 | kdgR          | putative tra  | 1937671 |
| 100 | 1 | 100    | STM3690 |               | putative inr  | 3880501 |
| 100 | 1 | 100    | STM3441 | rpsJ          | 30S riboso    | 3596219 |
| 100 | 1 | 100    | STM4360 | miaA          | delta(2)-isc  | 4603542 |
| 100 | 1 | 100    | STM3240 | tdcG          | L-serine de   | 3404998 |
| 100 | 1 | 100    | STM3301 | yhbZ          | putative G    | 3470219 |
| 100 | 1 | 100    | STM3217 | aer           | aerotaxis s   | 3382755 |
| 100 | 1 | 100    | STM3139 | gsp           | bifunctiona   | 3302347 |
| 100 | 1 | 100    | STM3066 | yggA          | putative LY   | 3227589 |
| 100 | 1 | 100    | STM1178 | flgF          | flagellar bic | 1261040 |
| 100 | 1 | 100    | STM3207 | ygiH          | putative inr  | 3371952 |
| 100 | 1 | 100    | STM1386 | ttrS          | Tetrathione   | 1471349 |
| 100 | 0 | 86     |         | STM3753; sugR | ATP bindin    | 3950009 |
| 100 | 1 | 100    | STM3194 |               | putative dis  | 3357003 |
| 100 | 1 | 100    | STM3103 | yggV          | putative Xa   | 3262528 |
| 100 | 1 | 100    | STM3051 | bglA          | 6-phospho     | 3209307 |
| 100 | 1 | 99     | STM0759 | ybgS          | putative ho   | 823066  |
| 100 | 1 | 100    | STM3136 |               | putative D-   | 3297423 |
| 100 | 1 | 100    | STM3072 |               | putative inr  | 3233748 |
| 100 | 1 | 100    | STM1105 | hpaH          | 4-hydroxyp    | 1192359 |
| 100 | 1 | 100    | STM0777 |               | putative inr  | 841820  |
| 100 | 1 | 100    | STM0818 |               | membrane      | 883687  |
| 100 | 1 | 100    | STM0863 | dacC          | D-alanyl-D-   | 935497  |
| 100 | 1 | 100    | STM0466 | ybaZ          | putative m    | 523957  |
| 100 | 1 | 100    | STM0391 | yaiE          | putative cyf  | 442607  |
| 100 | 0 | 100    | STM3127 |               | putative cyf  | 3287120 |
| 100 | 0 | 96     | STM0561 |               | Sensor pro    | 618590  |
| 100 | 0 | 85     | STM0562 |               | putative tra  | 619028  |

|        |   |        |          |          |              |         |
|--------|---|--------|----------|----------|--------------|---------|
| 100    | 1 | 100    | STM2541  | yfhF     | putative re  | 2680771 |
| 100    | 1 | 100    | STM1983  | dsrB     | regulatory l | 2068089 |
| 100    | 0 | 72     | STM2231  |          | homologue    | 2331492 |
| 100    | 1 | 100    | STM2185  | b2145    | putative inr | 2280943 |
| 100    | 1 | 100    | STM0825  | ybil     | putative Dr  | 891007  |
| 100    | 1 | 100    | STM4450  |          | putative inr | 4691680 |
| 100    | 1 | 100    | STM4523  | yjiW     | LexA regul   | 4777047 |
| 100    | 1 | 100    | STM2923  |          | putative cyf | 3065213 |
| 100    | 1 | 100    | STM1369  | sufA     | putative He  | 1452315 |
| 100    | 1 | 100    | STM1123  |          | putative pe  | 1207143 |
| 100    | 1 | 100    | STM1377  | lpp      | murein lipo  | 1459379 |
| 100    | 1 | 100    | STM3652  |          | putative cyf | 3838209 |
| 100    | 1 | 100    | STM3703  | yibN     | putative Rf  | 3896885 |
| 100    | 0 | 100    | STM0037  |          | putative cyf | 42932   |
| 100    | 1 | 100    | STM0071  | caiC     | crotonobet   | 82564   |
| 100    | 1 | 100    | STM0038  |          | putative arj | 44312   |
| 100    | 1 | 100    | STM0087  | folA     | dihydrofola  | 100839  |
| 100    | 1 | 100    | STM0091  | pdxA     | NAD-deper    | 103481  |
| 100    | 1 | 100    | STM0080  |          | putative ou  | 93607   |
| 100    | 0 | 63     | STM2630  |          | Gifsy-1 pro  | 2770340 |
| 100    | 1 | 99     | STM1632  |          | putative inr | 1722640 |
| 100    | 1 | 100    | STM1689  | pspB     | phage sho    | 1781463 |
| 100    | 1 | 100    | STM1673  |          | putative ou  | 1766967 |
| 100    | 0 | 66.337 | STM1628  |          | putative cyf | 1718823 |
| 100    | 1 | 100    | STM3196  | yqiC     | putative cyf | 3358881 |
| 100    | 0 | 65     | PSLT044  |          | putative int | P35113  |
| 100    | 0 | 59.615 | PSLT028  | ccdB     | toxin addic  | P20316  |
| 100    | 0 | 63.208 | PSLT091  | traW     | conjugative  | P71599  |
| 100    | 0 | 67.961 | PSLT037  | spvD     | Salmonella   | P26267  |
| 100    | 0 | 58.654 | PSLT063  |          | putative cyf | P52689  |
| 100    | 0 | 62.617 | PSLT100  | traH     | conjugative  | P78468  |
| 52.475 | 0 | 53.333 |          | ardB     |              | R27355  |
| 64     | 0 | 72.277 |          | mucA     |              | R28193  |
| 63.462 | 0 | 63.462 |          | traD     |              | R8435   |
| 44.762 | 0 | 56.481 |          | ardA     |              | R24042  |
| 58     | 0 | 62.5   |          | korA     |              | R3903   |
| 100    | 0 | 100    | PSLT010  | srgB     | sdiA-regul   | P05639  |
| 100    | 0 | 74     | aSTM0893 |          |              |         |
| 100    | 0 | 96     | aSTM2771 | aSTM1959 |              |         |
| 100    | 0 | 65.347 | aSTM0914 |          |              |         |
| 100    | 0 | 53.465 | aSTM0916 |          |              |         |
| 100    | 0 | 54.369 | STM0922  |          | Fels-1 pro   | 993599  |
| 100    | 1 | 100    | STM3113  | nupG     | MFS family   | 3271455 |
| 62.617 | 1 | 100    |          |          |              |         |
| 51.961 | 1 | 100    |          |          |              |         |
| 63.208 | 1 | 100    |          |          |              |         |
| 58     | 1 | 100    |          |          |              |         |
| 59.223 | 1 | 100    |          |          |              |         |
| 55.446 | 1 | 100    |          |          |              |         |
| 98.02  | 1 | 100    | aSTM0437 |          |              |         |
| 60.377 | 1 | 100    |          |          |              |         |
| 61.386 | 0 | 100    |          |          |              |         |

|        |   |              |
|--------|---|--------------|
| 59.804 | 1 | 100          |
| 57.547 | 0 | 100          |
| 43.689 | 1 | 100          |
| 87     | 1 | 100          |
| 100    | 1 | 100 aSTM1450 |
| 66.981 | 0 | 100          |
| 62.5   | 1 | 100          |
| 62.264 | 1 | 100          |
| 83     | 1 | 100          |
| 83     | 1 | 100          |
| 50.98  | 1 | 100          |
| 58.095 | 1 | 100          |
| 59.406 | 1 | 100          |
| 69     | 1 | 100          |
| 94     | 1 | 100          |
| 60.194 | 1 | 100          |
| 58.416 | 1 | 100          |
| 64.423 | 1 | 100          |
| 63.107 | 1 | 100          |
| 100    | 0 | 100 aSTM3655 |
| 66.99  | 1 | 100          |

0  
0  
0  
0  
0  
0  
0

|     |   |                |
|-----|---|----------------|
| 100 | 1 | 100 STM1227    |
| 100 | 1 | 100 STM0126    |
| 100 | 0 | 64.356 STM0159 |
| 100 | 1 | 100 STM0182    |
| 100 | 1 | 100 STM0233    |
| 100 | 1 | 100 STM1513    |
| 100 | 1 | 100 STM0194    |
| 100 | 0 | 100 STM0660    |
| 100 | 1 | 100 STM0696    |
| 100 | 0 | 73 STM3827     |
| 100 | 0 | 58.879 STM3846 |
| 100 | 1 | 100 STM3879    |
| 100 | 0 | 100 STM3841    |
| 100 | 1 | 100 STM3860    |
| 100 | 1 | 100 STM0014    |
| 100 | 1 | 100 STM2399    |
| 100 | 1 | 100 STM0775    |
| 100 | 1 | 100 STM0137    |
| 100 | 0 | 100 aSTM2779   |
| 100 | 1 | 100 STM1085    |
| 100 | 1 | 100 STM3402    |
| 100 | 1 | 100 STM3458    |
| 100 | 1 | 100 STM3496    |
| 100 | 1 | 100 STM1252    |
| 100 | 1 | 99 STM3450     |

|          |              |         |
|----------|--------------|---------|
| pepT     | putative pe  | 1313417 |
| murD     | UDP-N-acε    | 147400  |
|          | putative re  | 188515  |
| panB     | 3-methyl-2-  | 212486  |
|          | putative en  | 274183  |
|          | putative cy  | 1592074 |
| fhuB     | ABC super    | 227660  |
|          | putative cy  | 724288  |
| ybfF     | putative en  | 758236  |
| dgoT     | MFS family   | 4029213 |
|          | putative re  | 4052406 |
| yieN     | paral putati | 4087750 |
|          | putative inr | 4046165 |
|          | putative dij | 4067127 |
|          | putative tra | 15014   |
| pgtP     | Phosphogl    | 2512130 |
| galT     | galactose-   | 839524  |
| mutT     | 7,8-dihydro  | 161546  |
| aSTM2778 |              |         |
| yccA     | putative TE  | 1174268 |
| yrdC     | putative tra | 3574089 |
| yheR     | putative N/  | 3609016 |
| yrfG     | putative hy  | 3652384 |
|          | putative cy  | 1336322 |
| yheM     | putative ox  | 3603130 |

|     |   |        |          |          |              |         |
|-----|---|--------|----------|----------|--------------|---------|
| 100 | 1 | 100    | STM3487  | aroK     | shikimate k  | 3642227 |
| 100 | 1 | 100    | STM1233  | ycfC     | membrane     | 1320861 |
| 100 | 1 | 100    | STM1275  | yaoF     | putative he  | 1353820 |
| 100 | 1 | 100    | STM2104  | cpsG     | phosphom:    | 2187020 |
| 100 | 1 | 100    | STM2133  |          | putative cy  | 2225846 |
| 100 | 1 | 100    | STM3537  | glgX     | glycosyl hy  | 3704122 |
| 100 | 1 | 100    | STM3574  | yhhM     | putative inr | 3741224 |
| 100 | 1 | 100    | STM2135  |          | putative inr | 2227457 |
| 100 | 0 | 61.386 | STM2724  |          | Fels-2 proç  | 2866927 |
| 100 | 1 | 100    | STM0296  |          | putative cy  | 340454  |
| 100 | 0 | 65.049 | STM0328  |          | putative pe  | 371403  |
| 100 | 1 | 100    | STM2124  | alkA     | 3-methyl-a   | 2211488 |
| 100 | 0 | 99     | aSTM2714 | aSTM2713 |              |         |
| 100 | 0 | 65.741 | STM2748  |          | putative tra | 2888373 |
| 100 | 0 | 64.078 | STM0330  |          | putative 3-i | 374196  |
| 100 | 1 | 100    | STM1064  | pqiB     | paraquat-ir  | 1155185 |
| 100 | 1 | 100    | STM1475  | rstA     | response r   | 1551289 |
| 100 | 1 | 100    | STM0884  |          | putative inr | 954526  |
| 100 | 0 | 59.091 | STM0905  |          | Fels-1 proç  | 975824  |
| 100 | 0 | 60.194 | aSTM0922 | aSTM0923 |              |         |
| 100 | 1 | 100    | STM2528  |          | putative dir | 2661485 |
| 100 | 1 | 100    | STM2562  | yfhA     | putative tra | 2704074 |
| 100 | 0 | 65.347 | STM1031  |          | Gifsy-2 pro  | 1116857 |
| 100 | 1 | 100    | STM0970  | pflA     | pyruvate fo  | 1052688 |
| 100 | 1 | 100    | STM0995  | ycbB     | putative pe  | 1085020 |
| 100 | 1 | 100    | STM4061  | yiiP     | putative CI  | 4271243 |
| 100 | 1 | 100    | STM4224  | yjbG     | putative pe  | 4443196 |
| 100 | 0 | 99     | STM2910  |          | putative cy  | 3052902 |
| 100 | 1 | 100    | STM4342  | frdB     | fumarate re  | 4583255 |
| 100 | 0 | 72     | STM0927  |          | Fels-1 proç  | 1001442 |
| 100 | 1 | 100    | STM0974  | focA     | putative FN  | 1057438 |
| 100 | 1 | 100    | STM1005  |          | Gifsy-2 pro  | 1098228 |
| 100 | 1 | 100    | STM4188  | methH    | B12-depen    | 4408252 |
| 100 | 0 | 78     | STM4102  |          | putative inr | 4313424 |
| 100 | 1 | 99     | STM4253  |          | putative ou  | 4472626 |
| 100 | 1 | 100    | STM4467  |          | putative arç | 4709325 |
| 100 | 1 | 100    | STM2334  | yfbT     | putative ph  | 2445897 |
| 100 | 1 | 100    | STM2361  |          | putative reç | 2472873 |
| 100 | 1 | 100    | STM1208  | ycfN     | putative cy  | 1291772 |
| 100 | 0 | 65.385 | STM3121  |          | putative tra | 3279660 |
| 100 | 1 | 100    | STM1165  | grxB     | glutaredoxi  | 1250351 |
| 100 | 1 | 100    | STM4159  | thiH     | deoxyxyluk   | 4377022 |
| 100 | 1 | 100    | STM1320  | ydjN     | part of a ki | 1400075 |
| 100 | 1 | 100    | STM4356  | yjeF     | putative su  | 4598367 |
| 100 | 0 | 62.5   | STM2005  |          | putative en  | 2084458 |
| 100 | 1 | 100    | STM2261  | napF     | ferredoxin-  | 2359154 |
| 100 | 1 | 100    | STM2291  | yfaW     | paral putati | 2398214 |
| 100 | 0 | 64.151 | STM2007  |          | putative TF  | 2086921 |
| 100 | 1 | 100    | STM2263  | yojI     | putative AE  | 2360762 |
| 100 | 1 | 100    | STM2294  | yfaZ     | putative inr | 2401776 |
| 100 | 1 | 100    | STM2331  | yfbQ     | putative ar  | 2441995 |
| 100 | 1 | 100    | STM2369  | usg      | putative as  | 2481274 |

|     |   |              |       |               |         |
|-----|---|--------------|-------|---------------|---------|
| 100 | 1 | 100 STM1313  | celB  | PTS family    | 1392210 |
| 100 | 1 | 100 STM1414  | ssaV  | Secretion s   | 1493656 |
| 100 | 1 | 100 STM3876  | asnC  | transcriptio  | 4084699 |
| 100 | 1 | 100 STM0302  | safD  | putative firr | 346098  |
| 100 | 1 | 100 STM0230  | rnhB  | RNAse HII     | 268928  |
| 100 | 1 | 100 STM4234  | ubiA  | p-hydroxyb    | 4455210 |
| 100 | 1 | 100 STM2388  | yfcX  | paral putati  | 2498105 |
| 100 | 1 | 100 STM0131  | ftsQ  | cell divisior | 153533  |
| 100 | 1 | 100 STM1304  | astA  | arginine su   | 1383411 |
| 100 | 0 | 78 STM1353   | ydiR  | putative ele  | 1433552 |
| 100 | 1 | 99 STM1374   | ynhA  | putative Su   | 1457418 |
| 100 | 1 | 100 STM1574  | smvA  | Methyl viok   | 1656810 |
| 100 | 1 | 100 STM1417  | ssaP  | Secretion s   | 1497353 |
| 100 | 1 | 100 STM0400  | proY  | putative AF   | 454652  |
| 100 | 1 | 100 STM2255  | napC  | periplasmic   | 2353683 |
| 100 | 1 | 100 STM2572  | yfhH  | putative AE   | 2717588 |
| 100 | 1 | 100 STM2070  | yeeZ  | putative de   | 2148431 |
| 100 | 1 | 100 STM0105  | yabl  | putative De   | 122604  |
| 100 | 1 | 100 STM0144  | ppdD  | putative ma   | 167714  |
| 100 | 1 | 100 STM2272  | gyrA  | DNA gyras     | 2373711 |
| 100 | 1 | 100 STM2444  | cysP  | ABC super     | 2555425 |
| 100 | 1 | 100 STM0829  | glnP  | ABC super     | 895461  |
| 100 | 1 | 100 STM2015  | erfK  | putative pe   | 2096296 |
| 100 | 1 | 100 STM0592  | fepD  | ABC super     | 652565  |
| 100 | 0 | 36 STM2600   |       | Gifsy-1 pro   | 2749476 |
| 100 | 0 | 62.5 STM2610 |       | Gifsy-1 pro   | 2758320 |
| 100 | 1 | 100 STM3749  | yicl  | putative alç  | 3944576 |
| 100 | 1 | 100 STM3630  | dppA  | ABC super     | 3814422 |
| 100 | 1 | 100 STM3557  | ugpB  | ABC super     | 3726361 |
| 100 | 1 | 100 STM0952  |       | putative tra  | 1029345 |
| 100 | 1 | 100 STM2519  | engA  | putative G1   | 2651457 |
| 100 | 1 | 100 STM0477  | acrR  | acrAB oper    | 533754  |
| 100 | 1 | 100 STM0514  | ybbS  | putative tra  | 574850  |
| 100 | 1 | 100 STM4399  | ytfE  | putative ce   | 4636369 |
| 100 | 1 | 100 STM4508  | trpS2 | putative try  | 4761826 |
| 100 | 1 | 100 STM4581  | yjjK  | putative AE   | 4837159 |
| 100 | 1 | 100 STM3659  | yiaB  | putative inr  | 3844385 |
| 100 | 1 | 100 STM3235  | yhaJ  | putative tra  | 3400012 |
| 100 | 1 | 100 STM3483  | rpe   | D-ribulose-   | 3637995 |
| 100 | 1 | 100 STM3835  | gyrB  | DNA gyras     | 4038855 |
| 100 | 1 | 100 STM2077  | hisF  | imidazole ç   | 2155370 |
| 100 | 1 | 100 STM0413  | tsx   | nucleoside    | 467537  |
| 100 | 1 | 100 STM1707  | pyrF  | orotidine-5'  | 1800587 |
| 100 | 1 | 100 STM3408  | sun   | putative rR   | 3578460 |
| 100 | 1 | 100 STM3486  | aroB  | dehydroqui    | 3641082 |
| 100 | 1 | 100 STM1960  | fliD  | flagellar bic | 2049402 |
| 100 | 1 | 100 STM2581  | rnc   | RNase III, r  | 2724827 |
| 100 | 1 | 100 STM2463  | eutE  | putative alc  | 2573397 |
| 100 | 1 | 100 STM3993  | mobB  | molybdopte    | 4201684 |
| 100 | 1 | 100 STM2893  | invI  | surface pre   | 3036256 |
| 100 | 1 | 100 STM1241  | msgA  | Macrophag     | 1329466 |
| 100 | 1 | 100 STM2885  | sipB  | cell invasio  | 3029114 |

|     |   |             |          |               |         |
|-----|---|-------------|----------|---------------|---------|
| 100 | 1 | 100 STM0870 |          | putative tra  | 942709  |
| 100 | 1 | 100 STM0847 | ybiK     | putative as   | 917149  |
| 100 | 1 | 100 STM3473 | yhfC     | putative MF   | 3622071 |
| 100 | 1 | 100 STM2047 | pduL     | Propanedic    | 2123805 |
| 100 | 1 | 100 STM4288 | phnB     | putative cy   | 4529604 |
| 100 | 1 | 100 STM1899 | yebC     | putative cy   | 1993786 |
| 100 | 1 | 100 STM3365 | yhcQ     | putative m    | 3531973 |
| 100 | 1 | 100 STM0043 | rpsT     | 30S riboso    | 52280   |
| 100 | 1 | 100 STM0269 |          | putative cy   | 308622  |
| 100 | 1 | 100 STM1643 |          | putative inr  | 1736039 |
| 100 | 0 | 100 STM4020 | yihR     | putative alc  | 4230745 |
| 100 | 1 | 100 STM0800 | slrP     | leucine-rich  | 866944  |
| 100 | 1 | 100 STM2050 | pduO     | Propanedic    | 2125214 |
| 100 | 1 | 100 STM4298 | melA     | alpha-galac   | 4542398 |
| 100 | 1 | 100 STM1906 | yecP     | putative en   | 1999818 |
| 100 | 1 | 100 STM2062 | dacD     | DD-carbox     | 2136025 |
| 100 | 1 | 100 STM4259 |          | putative AE   | 4479864 |
| 100 | 1 | 100 STM2686 | yfjF     | putative cy   | 2825578 |
| 100 | 1 | 100 STM0045 | ribF     | flavokinase   | 52872   |
| 100 | 1 | 100 STM4451 | nrdG     | anaerobic i   | 4691968 |
| 100 | 1 | 100 STM1528 | aSTM1529 | putative ou   | 1605156 |
| 100 | 1 | 100 STM3918 | rfe      | undecaprei    | 4127073 |
| 100 | 1 | 100 STM3961 | pldB     | lysophosph    | 4165860 |
| 100 | 1 | 100 STM2980 | ygdE     | putative SA   | 3132765 |
| 100 | 1 | 100 STM4149 | rplK     | 50 S ribosc   | 4363105 |
| 100 | 1 | 100 STM1180 | flgH     | flagellar bic | 1262646 |
| 100 | 1 | 100 STM3476 | nirC     | FNT family    | 3626647 |
| 100 | 1 | 100 STM3360 | argR     | repressor c   | 3528028 |
| 100 | 1 | 100 STM2954 | mazG     | putative py   | 3100610 |
| 100 | 1 | 100 STM4092 | hslV     | peptidase c   | 4300491 |
| 100 | 1 | 100 STM3983 | fadB     | 3-hydroxya    | 4189310 |
| 100 | 1 | 100 STM3966 |          | putative ar   | 4172370 |
| 100 | 1 | 100 STM3950 | yigB     | putative hy   | 4154689 |
| 100 | 1 | 100 STM3939 | cyaA     | adenylate c   | 4146367 |
| 100 | 1 | 100 STM1266 |          | putative tra  | 1348191 |
| 100 | 1 | 100 STM4154 | rpoC     | RNA polym     | 4370013 |
| 100 | 1 | 100 STM1700 | fabI     | enoyl-[acyl-  | 1792136 |
| 100 | 1 | 100 STM1918 | cheR     | glutamate i   | 2013736 |
| 100 | 1 | 100 STM2964 | yqcB     | putative sy   | 3115544 |
| 100 | 1 | 100 STM0886 |          | putative su   | 956229  |
| 100 | 1 | 100 STM0517 | gcl      | glyoxylate c  | 577467  |
| 100 | 1 | 100 STM0997 | ycbL     | putative Me   | 1087697 |
| 100 | 1 | 100 STM1579 | narW     | nitrate redu  | 1665969 |
| 100 | 1 | 100 STM0336 | stbE     | putative fir  | 378981  |
| 100 | 1 | 100 STM1734 | yciC     | putative inr  | 1829299 |
| 100 | 1 | 100 STM1783 | pth      | peptidyl-tR   | 1881093 |
| 100 | 1 | 100 STM1818 | fadD     | acyl-CoA s    | 1915222 |
| 100 | 1 | 100 STM1848 | yebS     | putative inr  | 1944612 |
| 100 | 1 | 100 STM1877 |          | putative ar   | 1970392 |
| 100 | 1 | 100 STM0478 | aefA     | putative sr   | 534526  |
| 100 | 1 | 100 STM0612 |          | putative hy   | 675980  |
| 100 | 1 | 100 STM0625 | dpiB     | sensory his   | 688027  |

|     |   |        |         |      |               |         |
|-----|---|--------|---------|------|---------------|---------|
| 100 | 1 | 100    | STM0984 | msbA | ABC super     | 1070435 |
| 100 | 1 | 97     | STM0604 | ybdM | putative tra  | 666052  |
| 100 | 1 | 100    | STM1608 | tehB | paral putati  | 1698362 |
| 100 | 0 | 83     | STM1572 | nmpC | new outer r   | 1655173 |
| 100 | 1 | 100    | STM1605 | ydcN | putative ox   | 1695679 |
| 100 | 1 | 100    | STM3615 | yhjK | putative Di   | 3791714 |
| 100 | 0 | 100    | STM3130 |      | putative cy   | 3290592 |
| 100 | 1 | 100    | STM3698 |      | putative pe   | 3892725 |
| 100 | 1 | 100    | STM2849 | hycE | hydrogena     | 2993894 |
| 100 | 1 | 100    | STM2975 | fucP | pseudogen     | 3126871 |
| 100 | 1 | 100    | STM2691 |      | putative AE   | 2840524 |
| 100 | 1 | 100    | STM0414 | yajl | putative ou   | 468700  |
| 100 | 1 | 100    | STM0450 | lon  | DNA-bindir    | 505542  |
| 100 | 1 | 100    | STM3584 | nikR | nickel-resp   | 3751343 |
| 100 | 0 | 100    | STM3635 | yhjW | putative m    | 3820576 |
| 100 | 1 | 100    | STM3678 |      | putative ba   | 3864821 |
| 100 | 1 | 100    | STM3705 | yibP | paral putati  | 3899118 |
| 100 | 1 | 100    | STM0258 | yafD | putative cy   | 298240  |
| 100 | 1 | 100    | STM0405 | tgt  | tRNA-guan     | 460821  |
| 100 | 1 | 100    | STM3144 | hybF | putative hy   | 3307478 |
| 100 | 1 | 100    | STM2815 | emrB | putative MF   | 2962967 |
| 100 | 1 | 100    | STM3625 | yhjV | putative H/   | 3808931 |
| 100 | 1 | 100    | STM3681 |      | putative tra  | 3869680 |
| 100 | 1 | 100    | STM3299 | greA | transcriptio  | 3467930 |
| 100 | 1 | 100    | STM3214 | yqjH | putative tra  | 3379159 |
| 100 | 1 | 100    | STM3134 |      | putative pe   | 3294419 |
| 100 | 1 | 100    | STM2827 | alaS | alanyl-tRN/   | 2971371 |
| 100 | 1 | 100    | STM2190 | mgIB | ABC super     | 2286618 |
| 100 | 1 | 100    | STM2225 |      | putative inr  | 2326826 |
| 100 | 1 | 100    | STM2839 | ygaA | putative req  | 2983365 |
| 100 | 1 | 100    | STM2217 | yejB | putative AE   | 2318034 |
| 100 | 0 | 62.745 | STM2238 |      | putative ph   | 2337824 |
| 100 | 1 | 100    | STM2162 | yehW | putative AE   | 2257247 |
| 100 | 1 | 100    | STM0934 | ltaA | L-allo-threc  | 1009067 |
| 100 | 1 | 100    | STM3430 | rplN | 50S riboso    | 3591039 |
| 100 | 1 | 100    | STM2149 | stcD | putative ou   | 2242832 |
| 100 | 1 | 100    | STM2178 |      | putative 1,2  | 2274349 |
| 100 | 1 | 100    | STM3420 | secY | preprotein    | 3586027 |
| 100 | 1 | 100    | STM3589 | pitA | PiT family,   | 3758496 |
| 100 | 1 | 100    | STM3340 | yhck | putative req  | 3509147 |
| 100 | 1 | 100    | STM4527 | mrr  | restriction c | 4784466 |
| 100 | 1 | 100    | STM4410 | ytfN | putative pe   | 4647783 |
| 100 | 1 | 100    | STM4557 | holD | DNA polym     | 4812269 |
| 100 | 1 | 100    | STM4339 | blc  | outer mem     | 4581834 |
| 100 | 1 | 100    | STM4458 | yjgF | putative tra  | 4703033 |
| 100 | 1 | 100    | STM3253 |      | putative fru  | 3422605 |
| 100 | 1 | 100    | STM0667 | ybeX | putative CE   | 731730  |
| 100 | 1 | 100    | STM3322 | ptsN | sugar spec    | 3486271 |
| 100 | 1 | 100    | STM3234 | yhaH | putative inr  | 3399608 |
| 100 | 1 | 100    | STM0186 | dksA | dnaK supp     | 216398  |
| 100 | 1 | 100    | STM1403 | sscB | Secretion s   | 1487525 |
| 100 | 1 | 100    | STM3044 | xerD | recombina     | 3204425 |

|        |   |        |          |          |                   |         |
|--------|---|--------|----------|----------|-------------------|---------|
| 100    | 0 | 73.267 | STM0769  |          | putative cy       | 833339  |
| 100    | 1 | 100    | STM1398  |          | sseB Secretion s  | 1483934 |
| 100    | 1 | 100    | STM1090  |          | pipC Pathogenic   | 1177873 |
| 100    | 0 | 100    | STM0726  |          | putative gly      | 791776  |
| 100    | 1 | 100    | STM0788  |          | hutG formimionc   | 853061  |
| 100    | 1 | 100    | STM0832  |          | ybiF putative pe  | 898293  |
| 100    | 1 | 100    | STM3049  |          | yqfA putative he  | 3208014 |
| 100    | 1 | 100    | STM2955  |          | putative tra      | 3102440 |
| 100    | 1 | 100    | STM0406  |          | yajC preprotein   | 461971  |
| 100    | 1 | 100    | STM0473  |          | hha hemolysin     | 528131  |
| 100    | 1 | 100    | STM3159  |          | exbB uptake of e  | 3320009 |
| 100    | 1 | 100    | STM2983  |          | ygdI putative lip | 3135536 |
| 100    | 1 | 100    | STM1996  |          | cspB putative co  | 2079225 |
| 100    | 1 | 100    | STM4285  |          | fdhF formate de   | 4525350 |
| 100    | 1 | 100    | STM4251  |          | yjbR putative cy  | 4471944 |
| 100    | 1 | 100    | STM4331  |          | yjel putative ou  | 4576983 |
| 100    | 1 | 99     | STM1121  |          | ymdF putative cy  | 1206204 |
| 100    | 0 | 61.165 | STM3720  |          | yibR putative inr | 3915683 |
| 100    | 1 | 100    | STM2299  |          | yfbG paral putati | 2406093 |
| 100    | 0 | 100    | STM2252  | STM3817  | ccmC ABC super    | 2351600 |
| 100    | 1 | 98     | STM2732  |          | Fels-2 proç       | 2873769 |
| 100    | 1 | 100    | STM1616  |          | putative Su       | 1705470 |
| 100    | 1 | 100    | STM1526  |          | yneG putative cy  | 1603570 |
| 100    | 1 | 99     | STM1652  |          | ynaF putative un  | 1746131 |
| 100    | 1 | 100    | STM1876  |          | holE DNA polym    | 1970054 |
| 100    | 1 | 100    | STM0143  |          | hofB putative int | 166319  |
| 100    | 1 | 100    | STM3792  |          | putative L-f      | 3992244 |
| 100    | 1 | 100    | STM3878  |          | yieM putative inr | 4086305 |
| 100    | 1 | 100    | STM0417  |          | ribH riboflavin s | 471036  |
| 100    | 1 | 100    | STM3087  |          | yqgB putative inr | 3250912 |
| 100    | 0 | 99     | STM4255  |          | putative cy       | 4476003 |
| 100    | 1 | 100    | STM1645  |          | ynbE putative ou  | 1736962 |
| 100    | 1 | 100    | STM1687  |          | pspD phage shoç   | 1780863 |
| 100    | 0 | 99     | STM3760  |          | putative cy       | 3959108 |
| 100    | 1 | 100    | STM1840  |          | yobG putative inr | 1936919 |
| 100    | 0 | 76     | STM2618  |          | Gifsy-1 pro       | 2763574 |
| 100    | 1 | 100    | STM0742  |          | ybgT putative ou  | 812267  |
| 100    | 0 | 62.136 | PSLT069  |          | psiB Plasmid SÇ   | P57322  |
| 100    | 0 | 62.264 | PSLT050  | aPSLT049 | putative cy       | P40981  |
| 100    | 0 | 61.765 | PSLT099  |          | trbB conjugative  | P77930  |
| 100    | 0 | 62.857 | PSLT006  |          | repA DNA replic   | P01908  |
| 100    | 0 | 64     | PSLT071  |          | pseudogen         | P59000  |
| 100    | 0 | 58     | aPSLT108 | PSLT109  | pseudogen         | P89312  |
| 66     | 0 | 64     |          |          | qacEdelta1        | R38223  |
| 61.165 | 0 | 70     |          |          | sul1              | R38564  |
| 64.151 | 0 | 63.208 |          |          | ccgAl             | R23032  |
| 62.136 | 0 | 63.107 |          |          | mpr               | R30037  |
| 57     | 0 | 57     |          |          | traE              | R9694   |
| 100    | 0 | 100    | aSTM1826 |          |                   |         |
| 100    | 1 | 100    | STM0907  |          | Fels-1 proç       | 977159  |
| 100    | 0 | 62     | STM0911  |          | Fels-1 proç       | 981876  |
| 100    | 0 | 100    | STM2779  |          | putative inr      | 2926295 |



|        |   |              |
|--------|---|--------------|
| 100    | 0 | 100 aSTM2961 |
| 100    | 0 | 100 aSTM3076 |
| 100    | 0 | 100 aSTM0964 |
| 61.682 | 1 | 100          |
| 58.416 | 1 | 100          |
| 70     | 1 | 100          |
| 90     | 1 | 100          |
| 55     | 1 | 100          |
| 78     | 1 | 100          |
| 46.226 | 1 | 100          |
| 75     | 1 | 100          |
| 61.386 | 1 | 100          |
| 60.577 | 1 | 100          |
| 73     | 1 | 100          |
| 68     | 1 | 100          |
| 53     | 1 | 100          |
| 64.706 | 0 | 100          |
| 52.336 | 1 | 100          |
| 64.423 | 1 | 100          |
| 63.366 | 1 | 100          |
| 73     | 1 | 100          |
| 62.376 | 1 | 100          |
| 59.406 | 1 | 100          |
| 64.762 | 1 | 100          |
| 59.615 | 1 | 100          |
| 86     | 1 | 100          |
| 60.377 | 1 | 100          |
| 83     | 1 | 100          |
| 59.406 | 1 | 100          |
| 61.682 | 1 | 100          |
| 63.366 | 1 | 100          |
| 64.078 | 1 | 100          |
| 59.223 | 1 | 100          |

0  
0  
0  
0  
0  
0  
0

|     |   |                |
|-----|---|----------------|
| 100 | 1 | 100 STM0072    |
| 100 | 1 | 100 STM3315    |
| 100 | 1 | 100 STM3354    |
| 100 | 0 | 100 STM3388    |
| 100 | 0 | 61.386 STM0658 |
| 100 | 1 | 100 STM0692    |
| 100 | 1 | 100 STM0220    |
| 100 | 1 | 100 STM1505    |
| 100 | 1 | 100 STM1536    |
| 100 | 1 | 100 STM4455    |
| 100 | 0 | 100 STM2033    |
| 100 | 1 | 100 STM0007    |
| 100 | 1 | 100 STM1724    |

|      |               |         |
|------|---------------|---------|
| caiB | l-carnitine c | 84180   |
| yrbH | putative po   | 3480962 |
|      | putative tar  | 3522247 |
|      | putative mε   | 3557926 |
| ybeV | putative mc   | 721039  |
|      | putative tra  | 755353  |
| dxr  | 1-deoxy-D-    | 257846  |
| rspA | putative de   | 1582248 |
|      | putative hy   | 1610688 |
| treR | transcriptio  | 4698357 |
| cbiC | synthesis c   | 2110823 |
| talB | transaldola   | 7665    |
| trpD | anthranilat   | 1820112 |

|     |   |        |          |          |      |              |         |
|-----|---|--------|----------|----------|------|--------------|---------|
| 100 | 1 | 100    | STM2023  |          | cbiM | synthesis c  | 2102970 |
| 100 | 1 | 100    | STM1726  |          | trpB | tryptophan   | 1823079 |
| 100 | 0 | 94     | STM0065  |          |      | putative vir | 75088   |
| 100 | 1 | 100    | STM0096  |          | hepA | RNA polym    | 110002  |
| 100 | 1 | 100    | STM3333  |          |      | putative pu  | 3501838 |
| 100 | 0 | 76     | STM1050  |          |      | Gifsy-2 pro  | 1138914 |
| 100 | 1 | 100    | STM1096  |          | copR | Copper res   | 1183637 |
| 100 | 1 | 100    | STM1129  |          |      | putative inr | 1218274 |
| 100 | 1 | 100    | STM1167  |          | rimJ | acetylation  | 1252507 |
| 100 | 1 | 100    | STM1210  |          | ycfP | putative es  | 1293657 |
| 100 | 1 | 100    | STM1273  |          |      | putative nit | 1352183 |
| 100 | 1 | 100    | STM1155  |          | htrB | lauroyl/myr  | 1242616 |
| 100 | 1 | 100    | STM1202  |          | ycfH | putative mε  | 1285277 |
| 100 | 1 | 100    | STM3526  |          | glpD | sn-glycerol  | 3688731 |
| 100 | 1 | 100    | STM3551  |          | ggt  | gamma-glu    | 3720462 |
| 100 | 1 | 100    | STM4542  |          | yjjA | putative ou  | 4802273 |
| 100 | 0 | 99     | STM4584  |          | yjjX | putative cy  | 4841458 |
| 100 | 1 | 100    | STM1277  |          | yeaO | putative cy  | 1354437 |
| 100 | 1 | 100    | STM4546  |          | yjjP | paral putati | 4804628 |
| 100 | 1 | 100    | STM4586  |          | rob  | transcriptio | 4842666 |
| 100 | 1 | 100    | STM0274  |          |      | putative cy  | 314499  |
| 100 | 0 | 63.462 | STM2754  |          |      | putative he  | 2892409 |
| 100 | 1 | 100    | STM2775  |          | iroD | Similar to ε | 2921336 |
| 100 | 0 | 59     | STM4573  |          | stjC | putative fir | 4828889 |
| 100 | 0 | 41.748 | STM0277  |          |      | putative cy  | 317683  |
| 100 | 0 | 85     | STM0299  |          | safA | putative ou  | 342209  |
| 100 | 1 | 100    | STM2777  |          | iroN | TonB-depe    | 2923589 |
| 100 | 0 | 100    | STM4008  |          |      | putative cy  | 4216987 |
| 100 | 1 | 100    | STM1106  |          | hpal | 4-hydroxyp   | 1193173 |
| 100 | 1 | 100    | STM2405  |          |      | putative thi | 2520388 |
| 100 | 0 | 100    | STM2449  |          |      | putative ac  | 2559695 |
| 100 | 1 | 100    | STM2490  |          | gcvR | transcriptio | 2605001 |
| 100 | 1 | 100    | STM0968  |          | ycaD | putative MF  | 1049608 |
| 100 | 1 | 100    | STM0993  |          | mukE | putative ch  | 1079505 |
| 100 | 0 | 100    |          | STM4015  |      | putative cy  | 4224005 |
| 100 | 1 | 100    | STM2545  |          |      | putative rR  | 2683585 |
| 100 | 0 | 56.757 | STM2587  |          |      | Gifsy-1 pro  | 2733905 |
| 100 | 1 | 100    | STM4079  |          | yneC | putative inr | 4289070 |
| 100 | 1 | 100    | STM4118  |          | yijP | putative Int | 4333309 |
| 100 | 1 | 100    | STM4308  |          |      | putative co  | 4555731 |
| 100 | 0 | 74.51  | STM2943  |          |      | putative cy  | 3082472 |
| 100 | 1 | 100    | STM2503  |          |      | putative diç | 2618585 |
| 100 | 1 | 100    | STM2558  |          | cadB | APC family   | 2698536 |
| 100 | 0 | 63.725 | aSTM2590 | aSTM2591 |      |              |         |
| 100 | 1 | 100    | STM4068  |          |      | putative req | 4279021 |
| 100 | 0 | 70.476 | STM4113  |          | frwB | PTS system   | 4328395 |
| 100 | 1 | 100    | STM2857  |          | hypD | putative hy  | 3001358 |
| 100 | 0 | 62.745 | STM4490  |          |      | putative Mr  | 4735575 |
| 100 | 1 | 100    | STM4515  |          | yjiJ | putative su  | 4769280 |
| 100 | 0 | 95     | STM2055  |          | pduU | Propanedic   | 2130648 |
| 100 | 1 | 100    | STM1271  |          | yeaR | putative cy  | 1351406 |
| 100 | 1 | 100    | STM1483  |          | ydgE | putative mε  | 1560599 |

|     |   |        |         |         |      |                |         |
|-----|---|--------|---------|---------|------|----------------|---------|
| 100 | 1 | 100    | STM1234 |         | trmU | tRNA (5-m      | 1321589 |
| 100 | 1 | 100    | STM1213 |         | ycfQ | putative tra   | 1296551 |
| 100 | 0 | 99     | STM3478 |         | bigA | putative su    | 3629167 |
| 100 | 1 | 100    | STM1940 |         |      | putative ce    | 2033128 |
| 100 | 0 | 65     | STM4417 |         |      | putative tra   | 4658541 |
| 100 | 0 | 65.686 | STM4434 |         |      | putative pe    | 4677985 |
| 100 | 0 | 65.138 | STM4484 |         | idnD | L-idonate 5    | 4727963 |
| 100 | 0 | 60.396 | STM4419 |         |      | sugar (and     | 4661317 |
| 100 | 0 | 60.396 | STM4436 |         |      | putative en    | 4680240 |
| 100 | 0 | 100    | STM4486 |         | yjgB | putative alc   | 4729769 |
| 100 | 1 | 100    | STM2341 |         |      | putative tra   | 2454095 |
| 100 | 1 | 100    | STM1925 |         | flhD | regulator o    | 2021717 |
| 100 | 1 | 100    | STM1341 |         | btuE | ABC super      | 1420643 |
| 100 | 1 | 100    | STM2080 |         | udg  | UDP-glucos     | 2157958 |
| 100 | 1 | 100    | STM3836 |         | recF | gap repair     | 4041298 |
| 100 | 1 | 100    | STM2568 |         | yfhC | putative Cy    | 2713992 |
| 100 | 1 | 100    | STM0207 |         | pfs  | 5'-methylth    | 242062  |
| 100 | 1 | 100    | STM0127 |         | ftsW | essential co   | 148716  |
| 100 | 1 | 100    | STM0108 |         | tbpA | thiamine-bi    | 125687  |
| 100 | 1 | 100    | STM2385 |         | yfcB | putative me    | 2495662 |
| 100 | 1 | 99     | STM1321 |         | ydjM | LexA regul     | 1401603 |
| 100 | 1 | 100    | STM1978 |         | fliO | flagellar bic  | 2064949 |
| 100 | 1 | 100    | STM2147 |         | thiM | hydroxyethy    | 2241048 |
| 100 | 1 | 100    | STM1469 |         | fumC | fumarase C     | 1544000 |
| 100 | 0 | 65.686 | STM2089 |         | rfbJ | LPS side ch    | 2169999 |
| 100 | 1 | 100    | STM2094 |         | rfbC | dTDP-4,de      | 2175118 |
| 100 | 1 | 100    | STM3852 |         | yieH | putative ph    | 4059240 |
| 100 | 1 | 100    | STM0218 |         | pyrH | uridylylate ki | 256276  |
| 100 | 1 | 100    | STM0422 |         | dxs  | 1-deoxyxyl     | 474630  |
| 100 | 1 | 100    | STM0136 |         | secA | preprotein     | 158689  |
| 100 | 1 | 100    | STM2320 |         | nuoJ | NADH dehyd     | 2429798 |
| 100 | 0 | 84.158 | STM1054 |         |      | Gifsy-2 pro    | 1142282 |
| 100 | 1 | 100    | STM1016 | STM2624 |      | Gifsy-2 pro    | 1107990 |
| 100 | 1 | 100    | STM0502 |         | ybbL | putative AE    | 562486  |
| 100 | 1 | 100    | STM0493 |         | fsr  | putative MF    | 552241  |
| 100 | 1 | 100    | STM4341 |         | frdC | fumarate re    | 4582849 |
| 100 | 0 | 53.774 | STM2608 |         |      | Gifsy-1 pro    | 2755586 |
| 100 | 1 | 100    | STM1021 | STM2619 |      | Gifsy-2 pro    | 1110765 |
| 100 | 1 | 100    | STM3186 |         | tolC | outer mem      | 3348567 |
| 100 | 1 | 100    | STM3218 |         | oat  | putative ac    | 3384795 |
| 100 | 1 | 100    | STM3261 |         |      | galactitol-1   | 3430315 |
| 100 | 1 | 100    | STM2296 |         | ais  | aluminum i     | 2403067 |
| 100 | 1 | 100    | STM2427 |         | lig  | DNA ligase     | 2539001 |
| 100 | 1 | 100    | STM0519 |         | glxR | tartronic se   | 580138  |
| 100 | 0 | 100    |         | STM0028 | bcfH | putative thi   | 31274   |
| 100 | 0 | 64.356 | STM2597 |         |      | Gifsy-1 pro    | 2747033 |
| 100 | 0 | 60.185 | STM2613 | STM1027 |      | Gifsy-1 pro    | 2759863 |
| 100 | 1 | 100    | STM2652 |         | pssA | phosphatid     | 2792655 |
| 100 | 1 | 100    | STM3205 |         | bacA | bacitracin r   | 3370567 |
| 100 | 1 | 100    | STM3586 |         | yhiH | putative AE    | 3752958 |
| 100 | 1 | 100    | STM3280 |         | deaD | cysteine su    | 3446185 |
| 100 | 1 | 100    | STM0419 |         | thiL | thiamin-mc     | 472025  |

|     |   |        |          |          |              |         |
|-----|---|--------|----------|----------|--------------|---------|
| 100 | 1 | 100    | STM2440  | cysM     | cysteine sy  | 2551651 |
| 100 | 1 | 100    | STM0845  | moeB     | molybdopte   | 914962  |
| 100 | 1 | 100    | STM0264  | dnaQ     | DNA polym    | 303402  |
| 100 | 1 | 100    | STM1422  | ssaU     | Secretion s  | 1500431 |
| 100 | 1 | 100    | STM2352  | hisM     | ABC super    | 2462918 |
| 100 | 1 | 100    | STM0013  | dnaJ     | heat shock   | 13595   |
| 100 | 1 | 100    | STM1737  | tonB     | energy trar  | 1831260 |
| 100 | 1 | 100    | STM2455  | eutK     | putative ca  | 2565160 |
| 100 | 1 | 100    | STM4078  | yneB     | putative fru | 4288151 |
| 100 | 1 | 100    | STM0066  | carA     | carbamoyl-   | 75880   |
| 100 | 1 | 100    | STM2460  | eutH     | putative tra | 2570024 |
| 100 | 1 | 100    | STM4123  | argH     | argininosuc  | 4341419 |
| 100 | 1 | 100    | STM0758  | ybgR     | putative CI  | 822017  |
| 100 | 1 | 100    | STM0746  | tolR     | tol protein, | 814124  |
| 100 | 1 | 100    | STM2807  | nrdE     | ribonucleos  | 2952482 |
| 100 | 1 | 100    | STM1519  | marA     | transcriptio | 1597094 |
| 100 | 1 | 100    | STM2879  | sicP     | chaparone,   | 3023689 |
| 100 | 1 | 100    | STM1680  | ycjI     | putative ca  | 1773800 |
| 100 | 1 | 100    | STM3378  |          | putative inr | 3549103 |
| 100 | 1 | 100    | STM0239  | yaeQ     | putative cyI | 280692  |
| 100 | 1 | 100    | STM1231  | phoP     | response r   | 1318689 |
| 100 | 1 | 100    | STM4168  | nfi      | endonuclea   | 4385219 |
| 100 | 1 | 100    | STM2375  |          | putative cyI | 2486915 |
| 100 | 1 | 100    | STM4377  | aidB     | putative ac  | 4619614 |
| 100 | 1 | 100    | STM1393  | ssaB     | Secretion s  | 1479999 |
| 100 | 1 | 100    | STM1193  | fabH     | 3-oxoacyl-[  | 1277312 |
| 100 | 1 | 100    | STM1704  | yciT     | putative req | 1798912 |
| 100 | 1 | 100    | STM1904  | yecN     | putative inr | 1998642 |
| 100 | 0 | 100    | aSTM4261 |          |              |         |
| 100 | 0 | 79     | STM1008  | STM2633  | Gifsy-2 pro  | 1100136 |
| 100 | 1 | 100    | STM1142  | csgD     | putative tra | 1229728 |
| 100 | 1 | 100    | STM0717  |          | putative inr | 782654  |
| 100 | 1 | 100    | STM4171  | yjaH     | putative inr | 4386993 |
| 100 | 1 | 100    | STM3978  | yigC     | putative ox  | 4183598 |
| 100 | 1 | 100    | STM3953  | yigF     | putative inr | 4159174 |
| 100 | 1 | 100    | STM3915  | trxA     | thioredoxin  | 4124836 |
| 100 | 1 | 100    | STM1764  | narG     | nitrate red  | 1858413 |
| 100 | 1 | 100    | STM1822  | yoaB     | putative tra | 1920559 |
| 100 | 1 | 100    | STM1738  | ycil     | putative cyI | 1832212 |
| 100 | 1 | 100    | STM3010  | aas      | bifunctiona  | 3167872 |
| 100 | 1 | 100    | STM2897  | invE     | invasion pr  | 3040482 |
| 100 | 1 | 99     | STM2699  |          | Fels-2 pro   | 2849227 |
| 100 | 1 | 100    | STM2046  | pduK     | Propanedic   | 2123323 |
| 100 | 1 | 100    | STM1576  | narU     | MFS super    | 1659208 |
| 100 | 1 | 100    | STM3941  |          | putative inr | 4149560 |
| 100 | 1 | 100    | STM3927  |          | putative inr | 4136042 |
| 100 | 1 | 100    | STM3900  | ilvL     | ilvGEDA op   | 4108735 |
| 100 | 0 | 68.627 | STM2589  | aSTM0925 | Gifsy-1 pro  | 2737516 |
| 100 | 1 | 100    | STM1807  | dsbB     | putative dis | 1908514 |
| 100 | 1 | 100    | STM1715  | yciN     | putative cyI | 1812792 |
| 100 | 1 | 100    | STM2934  | cysN     | ATP-sulfur   | 3072942 |
| 100 | 1 | 100    | STM1880  | yebE     | putative inr | 1974069 |

|     |   |        |          |          |              |         |
|-----|---|--------|----------|----------|--------------|---------|
| 100 | 1 | 100    | STM0617  | rna      | RNase I, cl  | 679989  |
| 100 | 1 | 100    | STM1545  |          | putative m   | 1621409 |
| 100 | 1 | 100    | STM0598  | entA     | 2,3-dihydr   | 659921  |
| 100 | 1 | 100    | STM1612  |          | putative ce  | 1701798 |
| 100 | 0 | 65.686 | STM1555  |          | putative tra | 1632130 |
| 100 | 1 | 100    | STM1587  | yncD     | paral putati | 1673910 |
| 100 | 1 | 100    | STM1615  |          | putative nu  | 1704532 |
| 100 | 1 | 100    | STM1634  |          | putative an  | 1724659 |
| 100 | 1 | 100    | STM1892  | znuC     | ABC super    | 1987387 |
| 100 | 1 | 100    | STM0892  | ybjP     | putative lip | 962001  |
| 100 | 1 | 100    | STM0522  | allP     | putative NC  | 582566  |
| 100 | 1 | 100    | STM0523  | allB     | allantoinas  | 583958  |
| 100 | 1 | 100    | STM0961  | lolA     | periplasmic  | 1041566 |
| 100 | 1 | 100    | STM1640  | ydcF     | putative inr | 1730470 |
| 100 | 0 | 99     | STM1747  |          | putative inr | 1841307 |
| 100 | 1 | 100    | STM1792  |          | putative cy  | 1890393 |
| 100 | 1 | 100    | STM1828  | yoaE     | putative inr | 1926504 |
| 100 | 1 | 100    | STM3074  |          | putative AE  | 3235022 |
| 100 | 1 | 100    | STM3672  | yiaN     | putative De  | 3858684 |
| 100 | 0 | 91     | STM1553  |          | pseudogen    | 1628820 |
| 100 | 1 | 100    | STM3799  |          | putative pe  | 4000800 |
| 100 | 1 | 100    | STM2986  |          | putative int | 3137904 |
| 100 | 1 | 100    | STM3065  | yggE     | putative pe  | 3226749 |
| 100 | 0 | 60.577 | STM3120  |          | putative tra | 3278726 |
| 100 | 0 | 100    | STM3154  |          | putative AT  | 3317048 |
| 100 | 1 | 100    | STM2840  |          | putative fla | 2985071 |
| 100 | 1 | 100    | STM3086  | speA     | arginine de  | 3248927 |
| 100 | 0 | 63.551 | STM4186  |          | putative cy  | 4406793 |
| 100 | 1 | 100    | STM3654  |          | pseudogen    | 3839283 |
| 100 | 0 | 64.706 | STM3080  |          | putative m   | 3241814 |
| 100 | 0 | 100    | aSTM3114 |          |              |         |
| 100 | 1 | 100    | STM0455  | ybaX     | putative (al | 511670  |
| 100 | 1 | 100    | STM3590  | uspB     | universal s  | 3760132 |
| 100 | 1 | 100    | STM3108  | yggL     | putative cy  | 3267485 |
| 100 | 0 | 99     | aSTM0555 |          |              |         |
| 100 | 1 | 100    | STM4438  | pmbA     | putative pe  | 4681827 |
| 100 | 1 | 100    | STM4561  | osmY     | hyperosmo    | 4815879 |
| 100 | 1 | 100    | STM2812  |          | putative inr | 2959440 |
| 100 | 1 | 100    | STM2128  | yegO     | putative res | 2218648 |
| 100 | 1 | 100    | STM2215  | rtn      | putative m   | 2314556 |
| 100 | 1 | 100    | STM2099  | wcaM     | putative co  | 2180028 |
| 100 | 1 | 100    | STM2131  | baeR     | response r   | 2224537 |
| 100 | 1 | 100    | STM2203  | nfo      | endonucle    | 2302659 |
| 100 | 1 | 100    | STM2122  | udk      | uridine/cyti | 2207558 |
| 100 | 1 | 100    | STM1846  | proQ     | activator of | 1943202 |
| 100 | 1 | 100    | STM3695  | yibK     | putative tR  | 3889591 |
| 100 | 1 | 100    | STM3645  | yiaD     | putative ou  | 3832806 |
| 100 | 1 | 100    | STM2192  | yeiB     | putative inr | 2289287 |
| 100 | 1 | 100    | STM1775  | hemK     | putative pr  | 1872498 |
| 100 | 1 | 100    | STM3670  |          | putative ch  | 3857137 |
| 100 | 0 | 100    | aSTM0907 | STM1869A | putative pr  | 1966094 |
| 100 | 1 | 100    | STM4375  | yjfM     | putative inr | 4617725 |

|     |   |        |          |          |                    |         |
|-----|---|--------|----------|----------|--------------------|---------|
| 100 | 1 | 100    | STM3183  | icc      | cyclic 3',5'       | 3346463 |
| 100 | 1 | 100    | STM3273  | yhbT     | putative lipi      | 3439532 |
| 100 | 1 | 100    | STM3158  | exbD     | uptake of e        | 3319577 |
| 100 | 1 | 100    | STM3067  | yggB     | putative mε        | 3228424 |
| 100 | 1 | 100    | STM3325  | yrbL     | putative cyf       | 3488180 |
| 100 | 1 | 100    | STM3759  | marT     | putative tra       | 3958198 |
| 100 | 1 | 100    | STM3164  | yqhD     | putative alc       | 3324137 |
| 100 | 1 | 100    | STM1660  | fnr      | transcriptio       | 1754332 |
| 100 | 1 | 100    | STM3763  | mgtB     | Mg2+ trans         | 3961542 |
| 100 | 1 | 100    | STM3156  |          | putative cyf       | 3318052 |
| 100 | 1 | 100    | STM3077  | yggG     | putative Zn        | 3238660 |
| 100 | 1 | 100    | STM1083  | yccX     | putative ph        | 1173574 |
| 100 | 1 | 100    | STM0785  | ybhE     | putative 3-α       | 849181  |
| 100 | 1 | 100    | STM3097  | yqgF     | putative en        | 3258665 |
| 100 | 1 | 100    | STM1063  | pqiA     | paraquat-ir        | 1153927 |
| 100 | 1 | 100    | STM0748  | tolB     | tol protein r      | 815964  |
| 100 | 1 | 100    | STM0795  | bioF     | 7-keto-8-ar        | 861207  |
| 100 | 1 | 100    | STM0842  | ybiV(1)  | putative hy        | 910460  |
| 100 | 1 | 99     | STM1599  | pdgL     | Periplasmic        | 1689954 |
| 100 | 1 | 100    | STM0440  | cyoD     | cytochrome         | 494256  |
| 100 | 1 | 100    | STM3034  |          | putative cyf       | 3195554 |
| 100 | 1 | 100    | STM3102  | yggU     | putative cyf       | 3262230 |
| 100 | 1 | 100    | STM0485  | ybaB     | putative cyf       | 542881  |
| 100 | 1 | 100    | STM0587  | ybdZ     | putative cyf       | 645247  |
| 100 | 1 | 100    | STM2498  | upp      | uracil phos        | 2612033 |
| 100 | 0 | 60     | STM1034  |          | Gifsy-2 pro        | 1122838 |
| 100 | 1 | 100    | STM2148  |          | putative pe        | 2242255 |
| 100 | 1 | 99     | STM0355  |          | putative Cc        | 401402  |
| 100 | 1 | 100    | STM0411  | yajD     | putative cyf       | 466561  |
| 100 | 1 | 100    | STM3702  | grxC     | glutaredoxi        | 3896547 |
| 100 | 1 | 100    | STM4379  | yjfO     | putative lipi      | 4621687 |
| 100 | 1 | 100    | STM2856  | hypC     | putative hy        | 3001086 |
| 100 | 1 | 100    | STM1118  | yccJ     | putative cyf       | 1204975 |
| 100 | 1 | 100    | STM1249  |          | putative pe        | 1334045 |
| 100 | 1 | 100    | STM1314  | celC     | PTS family         | 1393619 |
| 100 | 1 | 100    | STM3772  |          | putative ph        | 3971905 |
| 100 | 1 | 100    | STM3773  |          | putative Nt        | 3972549 |
| 100 | 0 | 99     | STM0056  |          | putative ox        | 66654   |
| 100 | 1 | 100    | STM0018  |          | putative ex        | 17867   |
| 100 | 1 | 100    | STM0057  |          | putative cit       | 67052   |
| 100 | 0 | 100    | STM0019  |          | putative hy        | 20058   |
| 100 | 1 | 100    | STM0029  |          | putative tra       | 32545   |
| 100 | 1 | 100    | STM0093  | imp      | Organic so         | 105810  |
| 100 | 1 | 100    | STM1146  | ymdA     | putative pe        | 1232604 |
| 100 | 1 | 100    | STM1613  |          | putative PT        | 1702913 |
| 100 | 1 | 100    | STM1662  | ynaJ     | putative inr       | 1756279 |
| 100 | 1 | 100    | STM1603  | yncJ     | putative pe        | 1693405 |
| 100 | 0 | 59.223 | STM1551  |          | putative cyf       | 1626839 |
| 100 | 1 | 100    | STM3237  | yhaL     | putative cyf       | 3401738 |
| 100 | 0 | 61.321 | PSLT082  | traP     | conjugative P66050 |         |
| 100 | 0 | 64.706 | PSLT070  | psiA     | Plasmid SC P57753  |         |
| 100 | 0 | 63.107 | aPSLT108 | aPSLT109 |                    |         |

|        |   |                 |          |              |         |
|--------|---|-----------------|----------|--------------|---------|
| 100    | 0 | 61.765 PSLT031  | rsdB     | resolvase    | P21466  |
| 100    | 0 | 57.798 PSLT084  | traV     | conjugative  | P66866  |
| 100    | 0 | 58.416 PSLT035  |          | putative tra | P25309  |
| 61     | 0 | 61              | arsR     |              | R45382  |
| 61.386 | 0 | 64.815          | arsD     |              | R45783  |
| 71.569 | 0 | 71.569          | mucB     |              | R28621  |
| 56.731 | 0 | 60.396          |          |              | R41659  |
| 61.386 | 0 | 61.386          | ccgC     |              | R25049  |
| 100    | 0 | 70 PSLT023      | repA2    | DNA replic   | P16636  |
| 100    | 1 | 99 STM2714      |          | Fels-2 proç  | 2859028 |
| 100    | 0 | 100 aSTM2777    |          |              |         |
| 100    | 0 | 61.538 aSTM0915 |          |              |         |
| 100    | 0 | 64 aSTM0918     |          |              |         |
| 100    | 0 | 63.551 STM0923  |          | Fels-1 proç  | 994231  |
| 100    | 1 | 100 STM3114     | speC     | ornithine de | 3272773 |
| 61.538 | 1 | 100             |          |              |         |
| 100    | 1 | 100             | aSTM0705 |              |         |
| 59.048 | 1 | 100             |          |              |         |
| 63.551 | 0 | 100             |          |              |         |
| 62.376 | 1 | 100             |          |              |         |
| 90     | 1 | 100             |          |              |         |
| 58.252 | 1 | 100             |          |              |         |
| 60.952 | 1 | 100             |          |              |         |
| 65.385 | 1 | 100             |          |              |         |
| 63.725 | 0 | 100             |          |              |         |
| 59.615 | 1 | 100             |          |              |         |
| 62.376 | 1 | 100             |          |              |         |
| 78     | 1 | 100             |          |              |         |
| 53.465 | 1 | 100             |          |              |         |
| 57.282 | 1 | 100             |          |              |         |
| 62     | 1 | 100             |          |              |         |
| 40     | 1 | 100             |          |              |         |
| 99     | 1 | 100             |          |              |         |
| 55.446 | 1 | 100             |          |              |         |
| 98     | 0 | 100             | aSTM1056 |              |         |
| 61.765 | 1 | 100             |          |              |         |
| 99     | 0 | 100             | aSTM0056 |              |         |
| 100    | 1 | 100             | aSTM2729 |              |         |
| 94     | 1 | 100             |          |              |         |
| 53.398 | 1 | 100             |          |              |         |
| 71     | 1 | 100             |          |              |         |
| 64.356 | 1 | 100             |          |              |         |
| 97     | 1 | 100             | aSTM4524 |              |         |
| 92     | 1 | 100             |          |              |         |
| 64.151 | 1 | 100             |          |              |         |
|        | 0 |                 |          |              |         |
|        | 0 |                 |          |              |         |
|        | 0 |                 |          |              |         |
|        | 0 |                 |          |              |         |
|        | 0 |                 |          |              |         |
|        | 0 |                 |          |              |         |
| 100    | 0 | 61 STM1531      |          | putative hy  | 1607674 |

|     |   |        |          |                   |               |         |
|-----|---|--------|----------|-------------------|---------------|---------|
| 100 | 1 | 100    | STM3823  | torC              | trimethylar   | 4023353 |
| 100 | 1 | 100    | STM0434  | apbA              | ketopantoa    | 486780  |
| 100 | 1 | 100    | STM2019  | cbiP              | synthesis c   | 2099682 |
| 100 | 1 | 100    | STM0039  | nhaA              | NhaA famil    | 46190   |
| 100 | 1 | 100    | STM0075  | fixA              | putative fla  | 88684   |
| 100 | 1 | 100    | STM4050  | rhaT              | DMT Supe      | 4260899 |
| 100 | 1 | 100    | STM3173  | plsC              | 1-acyl-sn-g   | 3335953 |
| 100 | 1 | 100    | STM3327  | yhbL              | sigma cros    | 3489612 |
| 100 | 1 | 100    | STM3366  | yhcR              | putative inr  | 3532913 |
| 100 | 1 | 100    | STM3391  | acrF              | RND family    | 3562273 |
| 100 | 1 | 100    | STM0653  | ybeL              | putative cyf  | 716566  |
| 100 | 1 | 100    | STM0154  | lpdA              | lipoamide c   | 181007  |
| 100 | 0 | 99     | STM0178  | yadI              | putative PT   | 209293  |
| 100 | 1 | 100    | STM0210  | yaeG              | putative inr  | 246072  |
| 100 | 1 | 100    | STM0241  | cutF              | pseudogen     | 281688  |
| 100 | 0 | 75     | STM1525  | yneH              | putative glu  | 1602644 |
| 100 | 0 | 57.426 | STM3636  | lpfE              | long polar f  | 3822485 |
| 100 | 1 | 100    | STM3543  | gntR              | transcriptio  | 3712167 |
| 100 | 0 | 63.462 | STM4539  |                   | putative glu  | 4797476 |
| 100 | 1 | 100    | STM4592  | sthD              | putative firr | 4848937 |
| 100 | 0 | 63.107 | STM2742  |                   | putative cyf  | 2880444 |
| 100 | 0 | 95     | STM0325  | aSTM0324; aSTM276 | putative IS:  | 369197  |
| 100 | 0 | 62.617 | STM1052  |                   | pseudogen     | 1141007 |
| 100 | 1 | 100    | STM2708  |                   | Fels-2 proç   | 2856164 |
| 100 | 0 | 60.377 | STM2734  |                   | Fels-2 proç   | 2874631 |
| 100 | 1 | 100    | STM0311  | yafJ              | putative glu  | 356072  |
| 100 | 1 | 100    | STM2783  | nxiA              | putative nic  | 2931213 |
| 100 | 1 | 100    | STM1101  | hpaG              | 4-hydroxyp    | 1188221 |
| 100 | 1 | 100    | STM1135  | ycdW              | paral putati  | 1225066 |
| 100 | 0 | 61.165 | aSTM1046 | aSTM1047          |               |         |
| 100 | 1 | 100    | STM1092  | orfX              | putative cyf  | 1180248 |
| 100 | 1 | 100    | STM1126  | phoH              | PhoB-depe     | 1214315 |
| 100 | 1 | 100    | STM1158  |                   | putative inr  | 1245432 |
| 100 | 1 | 100    | STM1206  | ycfL              | putative ou   | 1290765 |
| 100 | 0 | 77     | STM3529  |                   | putative gly  | 3692494 |
| 100 | 1 | 100    | STM3401  | aroE              | dehydroshi    | 3573266 |
| 100 | 1 | 100    | STM1164  | yceB              | putative ou   | 1249666 |
| 100 | 1 | 100    | STM3506  | feoB              | FeoB famil    | 3664136 |
| 100 | 0 | 61.165 | STM3530  |                   | pseudogen     | 3693941 |
| 100 | 1 | 100    | STM3579  | yhhQ              | putative int  | 3746924 |
| 100 | 1 | 100    | STM4073  | ydeW              | putative tra  | 4282286 |
| 100 | 0 | 65.094 | STM1039  |                   | Gfsy-2 pro    | 1125205 |
| 100 | 0 | 67     | STM4204  |                   | putative inr  | 4424446 |
| 100 | 1 | 100    | STM4246  | dnaB              | putative reç  | 4466591 |
| 100 | 1 | 100    | STM4283  | gltP              | DAACS far     | 4523016 |
| 100 | 1 | 100    | STM2929  | ispF              | 2C-methyl-    | 3070266 |
| 100 | 1 | 100    | STM0871  | ybjM              | putative inr  | 944665  |
| 100 | 1 | 100    | STM2379  |                   | putative pe   | 2489936 |
| 100 | 0 | 48.039 | STM0909  |                   | Fels-1 proç   | 979090  |
| 100 | 0 | 66.019 | STM0925  | aSTM2589          | Fels-1 proç   | 995580  |
| 100 | 1 | 100    | STM2532  |                   | putative inr  | 2667763 |
| 100 | 1 | 100    | STM4184  | aceA              | isocitrate ly | 4403672 |



|     |   |        |         |       |               |         |
|-----|---|--------|---------|-------|---------------|---------|
| 100 | 0 | 78     | STM4207 |       | putative ph   | 4427609 |
| 100 | 1 | 100    | STM4278 | nrfB  | formate-de    | 4517565 |
| 100 | 1 | 100    | STM4315 |       | putative Ar   | 4560882 |
| 100 | 1 | 100    | STM4347 | yjeP  | putative pe   | 4589233 |
| 100 | 1 | 100    | STM2401 | ddg   | cold shock    | 2514561 |
| 100 | 1 | 100    | STM2446 |       | putative iro  | 2557628 |
| 100 | 1 | 100    | STM2488 | nlpB  | lipoprotein-  | 2602992 |
| 100 | 1 | 100    | STM1295 | sppA  | protease IV   | 1372910 |
| 100 | 1 | 100    | STM0024 | bcfD  | fimbrial suk  | 28425   |
| 100 | 1 | 100    | STM4374 | yjfL  | putative inr  | 4617317 |
| 100 | 1 | 100    | STM4411 | ytfP  | putative cyf  | 4651565 |
| 100 | 1 | 100    | STM2273 |       | putative de   | 2376757 |
| 100 | 1 | 100    | STM2319 | nuoK  | NADH deh      | 2429499 |
| 100 | 1 | 100    | STM2311 | elaB  | putative inr  | 2418778 |
| 100 | 1 | 100    | STM2339 | yfcC  | putative int  | 2451580 |
| 100 | 1 | 100    | STM2058 | pduX  | Propanedic    | 2132712 |
| 100 | 1 | 100    | STM3242 | tdcD  | propionate    | 3408760 |
| 100 | 0 | 83     | STM0197 | stfD  | putative pe   | 233978  |
| 100 | 1 | 100    | STM1149 | mdoC  | membrane      | 1234992 |
| 100 | 0 | 66     | STM0199 | stfF  | putative mi   | 235258  |
| 100 | 1 | 100    | STM0367 | prpR  | regulator fc  | 416087  |
| 100 | 1 | 100    | STM1284 | yeaH  | putative cyf  | 1360419 |
| 100 | 1 | 100    | STM1428 | ydhC  | putative MF   | 1505673 |
| 100 | 1 | 100    | STM4383 | sgaT  | putative PT   | 4625200 |
| 100 | 0 | 61.538 | STM4420 |       | putative inr  | 4663106 |
| 100 | 1 | 100    | STM2356 | ubiX  | 3-octapren    | 2466582 |
| 100 | 1 | 100    | STM1337 | pheS  | phenylalan    | 1415678 |
| 100 | 1 | 100    | STM1372 | sufD  | required fo   | 1454917 |
| 100 | 1 | 100    | STM4560 | prfC  | peptide cha   | 4813888 |
| 100 | 1 | 100    | STM1494 |       | ABC-type t    | 1571259 |
| 100 | 1 | 100    | STM3776 | yicM  | putative MF   | 3977385 |
| 100 | 1 | 100    | STM4230 | malkK | bifunctiona   | 4450881 |
| 100 | 1 | 100    | STM3882 | rbsA  | ABC super     | 4092086 |
| 100 | 1 | 100    | STM0248 | yaeD  | putative de   | 288244  |
| 100 | 1 | 100    | STM1991 | vsr   | DNA mism      | 2073878 |
| 100 | 1 | 100    | STM4241 | zur   | transcriptio  | 4461800 |
| 100 | 0 | 100    | STM1305 | astD  | succinylglu   | 1384442 |
| 100 | 1 | 100    | STM1308 | spy   | periplasmic   | 1388557 |
| 100 | 0 | 73     | STM1356 | ydiO  | putative ac   | 1436703 |
| 100 | 1 | 100    | STM1442 | ydhJ  | putative mt   | 1518586 |
| 100 | 1 | 100    | STM1176 | flgD  | flagellar bic | 1259083 |
| 100 | 1 | 100    | STM2095 | rfbA  | dTDP-gluc     | 2175670 |
| 100 | 1 | 100    | STM0319 | crl   | transcriptio  | 364528  |
| 100 | 1 | 100    | STM4513 | yjiG  | putative pe   | 4767278 |
| 100 | 1 | 100    | STM4596 |       | putative inr  | 4853733 |
| 100 | 1 | 100    | STM3617 | bcsC  | endo-1,4-D    | 3797418 |
| 100 | 1 | 100    | STM3270 | yhbP  | putative cyf  | 3438250 |
| 100 | 1 | 100    | STM2306 | menC  | o-succinylb   | 2413037 |
| 100 | 1 | 100    | STM2286 | glpC  | sn-glycerol   | 2393110 |
| 100 | 1 | 100    | STM2491 | bcp   | thiol peroxi  | 2605639 |
| 100 | 1 | 100    | STM0505 | ybbO  | putative ox   | 564929  |
| 100 | 0 | 63.107 | STM2595 |       | Gifsy-1 pro   | 2746252 |

|     |   |        |         |         |             |                  |         |
|-----|---|--------|---------|---------|-------------|------------------|---------|
| 100 | 0 | 60.194 | STM2611 |         | Gifsy-1 pro | 2758957          |         |
| 100 | 1 | 100    | STM3746 |         | gltS        | GltS family      | 3939819 |
| 100 | 1 | 100    | STM3629 |         | dppB        | ABC super        | 3813246 |
| 100 | 1 | 100    | STM3626 |         | dppF        | ABC super        | 3810330 |
| 100 | 1 | 100    | STM3545 |         | yhhX        | putative ox      | 3714111 |
| 100 | 0 | 58.095 | STM1042 |         |             | Gifsy-2 pro      | 1128993 |
| 100 | 1 | 100    | STM1014 | STM2626 |             | Gifsy-2 pro      | 1106244 |
| 100 | 1 | 100    | STM4470 |         | yjgD        | putative cy      | 4712917 |
| 100 | 1 | 100    | STM2945 |         | sopD        | secreted pi      | 3087148 |
| 100 | 1 | 100    | STM4460 |         | pyrB        | aspartate c      | 4703970 |
| 100 | 1 | 100    | STM4101 |         | metL        | aspartokin       | 4310876 |
| 100 | 1 | 100    | STM0706 |         | kdpA        | P-type ATF       | 772356  |
| 100 | 1 | 100    | STM0713 |         | ybgK        | putative ca      | 779457  |
| 100 | 1 | 100    | STM0544 |         | fimI        | fimbrial pro     | 604748  |
| 100 | 1 | 100    | STM2565 |         | purG        | phosphorib       | 2708254 |
| 100 | 1 | 100    | STM4049 |         | rhaR        | positive reg     | 4260054 |
| 100 | 0 | 100    |         | STM0645 | ybeN        | putative Ni      | 706846  |
| 100 | 1 | 100    | STM0268 |         |             | putative cy      | 306723  |
| 100 | 1 | 100    | STM2559 |         | cadA        | lysine deca      | 2699950 |
| 100 | 1 | 100    | STM3502 |         | ompR        | response r       | 3659606 |
| 100 | 1 | 100    | STM1695 |         | sapD        | ABC super        | 1787166 |
| 100 | 1 | 100    | STM0110 |         | leuD        | 3-isopropyl      | 129057  |
| 100 | 1 | 100    | STM1749 |         | adhE        | iron-depen       | 1843128 |
| 100 | 1 | 100    | STM2892 |         | invJ        | surface pre      | 3035246 |
| 100 | 1 | 100    | STM2459 |         | eutA        | CPPZ-55 p        | 2568624 |
| 100 | 1 | 100    | STM4029 |         | yjiD        | putative ac      | 4238645 |
| 100 | 1 | 100    | STM0634 |         | ybeF        | putative tra     | 696033  |
| 100 | 1 | 100    | STM4165 |         | rsd         | regulator o      | 4382750 |
| 100 | 1 | 100    | STM4022 |         | yihT        | putative alc     | 4232863 |
| 100 | 1 | 100    | STM4002 |         |             | putative cy      | 4210124 |
| 100 | 1 | 100    | STM1518 |         | marB        | multiple an      | 1596850 |
| 100 | 1 | 100    | STM1191 |         | rpmF        | 50S riboso       | 1275846 |
| 100 | 1 | 100    | STM1682 |         | tpx         | thiol peroxi     | 1775584 |
| 100 | 1 | 100    | STM2501 |         | ppk         | polyphosph       | 2614937 |
| 100 | 1 | 99     | STM3362 |         |             | putative pe      | 3529230 |
| 100 | 1 | 100    | STM3719 |         | rfaB        | UDP-D-gal        | 3914534 |
| 100 | 0 | 99     | STM0305 |         |             | putative cy      | 349674  |
| 100 | 1 | 99     | STM4160 |         | thiG        | deoxyxyluk       | 4378152 |
| 100 | 1 | 100    | STM3774 |         |             | putative inr     | 3975544 |
| 100 | 1 | 100    | STM1948 |         |             | putative inr     | 2039215 |
| 100 | 1 | 100    | STM3870 |         | atpE        | membrane         | 4079066 |
| 100 | 1 | 100    | STM2037 |         | pduF        | Propanedic       | 2115527 |
| 100 | 1 | 100    | STM4294 |         | yjdE        | putative AF      | 4536161 |
| 100 | 1 | 100    | STM1911 |         |             | putative cy      | 2006444 |
| 100 | 1 | 100    | STM1712 |         | acnA        | aconitate h      | 1804755 |
| 100 | 1 | 100    | STM2670 |         | aroF        | 3-deoxy-D-       | 2811475 |
| 100 | 1 | 100    | STM2960 |         | gudD        | d-glucarate      | 3110539 |
| 100 | 1 | 100    | STM0428 |         | phnT        | 2-aminoeth       | 481023  |
| 100 | 1 | 100    | STM3977 |         | rfaH        | transcriptio     | 4182924 |
| 100 | 1 | 100    | STM3952 |         | corA        | MIT family,      | 4158175 |
| 100 | 0 | 100    | STM3923 |         | rffH        | glucose-1- $\mu$ | 4132779 |
| 100 | 1 | 100    | STM1885 |         | edd         | 6-phospho        | 1977621 |

|     |   |                |                   |              |         |
|-----|---|----------------|-------------------|--------------|---------|
| 100 | 1 | 100 STM3912    | rep               | rep helicase | 4119763 |
| 100 | 1 | 100 STM0107    | yabK              | putative bir | 124101  |
| 100 | 1 | 100 STM1748    | ychE              | putative int | 1842004 |
| 100 | 1 | 100 STM1788    |                   | putative Ni  | 1887755 |
| 100 | 1 | 100 STM3001    | thyA              | thymidylate  | 3158017 |
| 100 | 1 | 100 STM1743    | oppD              | ABC super    | 1836624 |
| 100 | 1 | 100 STM4042    |                   | putative br  | 4252099 |
| 100 | 1 | 100 STM3955    | rarD              | chloramph    | 4160063 |
| 100 | 1 | 100 STM3907    |                   | putative cy  | 4115982 |
| 100 | 0 | 48.571 STM2601 |                   | Gifsy-1 pro  | 2750082 |
| 100 | 1 | 100 STM1804    | ycgB              | putative cy  | 1904310 |
| 100 | 1 | 100 STM1756    | purU              | formyltetra  | 1851568 |
| 100 | 1 | 100 STM1597    | ydcW              | putative alc | 1686834 |
| 100 | 1 | 100 STM1845    | prc               | carboxy-ter  | 1941134 |
| 100 | 1 | 100 STM1890    | yebA              | putative Pe  | 1985080 |
| 100 | 1 | 100 STM0504    | ybbN              | paral putati | 564015  |
| 100 | 1 | 100 STM0527    | allC              | allantoate   | 588723  |
| 100 | 1 | 100 STM0531    | yIbF              | putative cy  | 594305  |
| 100 | 1 | 100 STM0579    | ybdF              | putative cy  | 637778  |
| 100 | 1 | 100 STM0616    | rnk               | regulator o  | 679344  |
| 100 | 0 | 99 STM1549     |                   | putative tra | 1626005 |
| 100 | 1 | 100 STM1785    |                   | putative cy  | 1883068 |
| 100 | 1 | 100 STM1617    |                   | putative rib | 1705919 |
| 100 | 1 | 100 STM1620    |                   | putative ox  | 1707842 |
| 100 | 0 | 99             | STM1653           | putative me  | 1746615 |
| 100 | 1 | 100 STM1681    | ycjG              | putative ch  | 1774503 |
| 100 | 1 | 100 STM0498    | ybaR              | putative co  | 557945  |
| 100 | 1 | 100 STM1522    | ydeA              | MFS family   | 1598902 |
| 100 | 1 | 100 STM1560    |                   | putative al  | 1640717 |
| 100 | 0 | 77 STM3083     |                   | putative M   | 3244366 |
| 100 | 1 | 100 STM0435    | yajQ              | putative cy  | 487799  |
| 100 | 1 | 100 STM3582    | yhhT              | putative Pe  | 3749572 |
| 100 | 0 | 100            | STM4041; aSTM4042 | putative inr | 4251776 |
| 100 | 1 | 100 STM3673    | yiaO              | putative dic | 3859973 |
| 100 | 1 | 100 STM3732    | ttk               | putative tra | 3925285 |
| 100 | 1 | 100 STM3739    | yicF              | putative DM  | 3931156 |
| 100 | 1 | 100 STM2977    | fucK              | L-fuculokin  | 3130096 |
| 100 | 0 | 99 STM2695     |                   | Fels-2 pro   | 2844714 |
| 100 | 1 | 100 STM0396    | sbcD              | ATP-deper    | 449378  |
| 100 | 1 | 100 STM3138    |                   | putative me  | 3300619 |
| 100 | 0 | 100 STM3601    |                   | putative ph  | 3773376 |
| 100 | 1 | 100 STM3696    |                   | putative tra | 3890132 |
| 100 | 0 | 100 STM3784    |                   | putative ph  | 3983948 |
| 100 | 1 | 100 STM2689    |                   | pseudogen    | 2827580 |
| 100 | 0 | 100            | STM0052           | putative tra | 61106   |
| 100 | 1 | 100 STM0423    | ispA              | geranyltran  | 476516  |
| 100 | 1 | 100 STM3165    | yqhE              | 2,5-diketo-l | 3325406 |
| 100 | 0 | 52.427 STM2236 |                   | putative ph  | 2336666 |
| 100 | 1 | 100 STM2157    | yehS              | putative cy  | 2253230 |
| 100 | 1 | 100 STM0938    | ybjE              | putative inr | 1014759 |
| 100 | 1 | 100 STM3650    |                   | putative pe  | 3836825 |
| 100 | 1 | 100 STM4338    | sugE              | putative DM  | 4581500 |

|     |   |        |          |      |               |         |
|-----|---|--------|----------|------|---------------|---------|
| 100 | 1 | 100    | STM4439  | cybC | cytochrome    | 4683278 |
| 100 | 1 | 100    | STM3438  | rplW | 50S riboso    | 3594642 |
| 100 | 1 | 100    | STM4357  | yjeE | putative nu   | 4599886 |
| 100 | 0 | 99     | STM3285  | rbfA | ribosome-t    | 3452988 |
| 100 | 1 | 100    | STM3200  | rfaE | bifunctiona   | 3362559 |
| 100 | 1 | 100    | STM3128  |      | putative ox   | 3287509 |
| 100 | 1 | 100    | STM2816  |      | putative gly  | 2964554 |
| 100 | 1 | 100    | STM4582  | slt  | lytic mureir  | 4838999 |
| 100 | 1 | 100    | STM0376  | sbmA | putative AE   | 430359  |
| 100 | 0 | 100    | STM2212  | yeiR | putative co   | 2311509 |
| 100 | 1 | 100    | STM2091  | rfbG | LPS side c    | 2172266 |
| 100 | 1 | 100    | STM2150  | stcC | paral putati  | 2243855 |
| 100 | 1 | 100    | STM1836  |      | putative pe   | 1933582 |
| 100 | 0 | 100    | aSTM3113 |      |               |         |
| 100 | 1 | 100    | STM3064  | iciA | inhibitor of  | 3225590 |
| 100 | 1 | 100    | STM0750  | ybgF | putative pe   | 817825  |
| 100 | 1 | 100    | STM0820  | rhIE | putative AT   | 885586  |
| 100 | 1 | 100    | STM3043  | dsbC | protein dist  | 3203688 |
| 100 | 1 | 100    | STM1179  | flgG | flagellar bic | 1261809 |
| 100 | 1 | 100    | STM0792  | ybhB | putative Ph   | 858260  |
| 100 | 0 | 59.804 | STM0860  |      | putative inr  | 933178  |
| 100 | 1 | 100    | STM3317  | yrbK | putative inr  | 3482532 |
| 100 | 1 | 100    | STM3764  | mgtC | Mg2+ trans    | 3964488 |
| 100 | 1 | 100    | STM3101  | yggT | putative int  | 3261667 |
| 100 | 1 | 100    | STM1947  | uvrY | putative res  | 2038247 |
| 100 | 1 | 100    | STM3330  | gltB | glutamate :   | 3494523 |
| 100 | 1 | 100    | STM3254  |      | putative fru  | 3423470 |
| 100 | 1 | 100    | STM3211  | rpoD | sigma D (s    | 3376266 |
| 100 | 1 | 100    | STM1399  | sscA | Secretion s   | 1484521 |
| 100 | 0 | 64     | STM2232  | oafA | O-antigen f   | 2332130 |
| 100 | 0 | 57.547 | STM0763  |      | transcriptio  | 826492  |
| 100 | 1 | 100    | STM0740  | cydA | cytochrome    | 809529  |
| 100 | 1 | 100    | STM2873  | prgI | cell invasio  | 3016075 |
| 100 | 1 | 100    | STM2799  | stpA | DNA-bindir    | 2947225 |
| 100 | 1 | 99     | STM3727  | rpmG | 50S riboso    | 3922038 |
| 100 | 1 | 100    | STM2676  | rpsP | 30S riboso    | 2816640 |
| 100 | 1 | 100    | STM0541  | ybcJ | putative cy   | 602488  |
| 100 | 1 | 100    | STM1706  | yciH | putative tra  | 1800261 |
| 100 | 0 | 100    | STM1699  | ycjE | putative cy   | 1791719 |
| 100 | 1 | 100    | STM1966  | yedF | putative tra  | 2055004 |
| 100 | 1 | 100    | STM1592  | ydcY | putative cy   | 1679314 |
| 100 | 0 | 100    | STM3944  |      | putative inr  | 4150937 |
| 100 | 1 | 100    | STM3910  | ppiC | peptidyl-pro  | 4118944 |
| 100 | 1 | 100    | STM0982  | himD | integration   | 1067620 |
| 100 | 0 | 85     | STM2937  | ygbF | putative inr  | 3078244 |
| 100 | 1 | 100    | STM3675  | sgbH | putative 3-l  | 3862456 |
| 100 | 0 | 83     | STM1358  | aroD | 3-dehydroc    | 1439617 |
| 100 | 0 | 76     | STM1351  | ydiT | putative fer  | 1431919 |
| 100 | 0 | 99     | STM3945  |      | pseudogen     | 4151314 |
| 100 | 1 | 100    | STM4336  | ecnB | putative en   | 4580479 |
| 100 | 1 | 100    | STM4599  | yjjY | putative inr  | 4856182 |
| 100 | 1 | 100    | STM0001  | thrL | thr operon    | 190     |

|        |   |                                                            |      |              |         |
|--------|---|------------------------------------------------------------|------|--------------|---------|
| 100    | 0 | 97.03 STM4462                                              | yjgG | putative cy  | 4705022 |
| 100    | 0 | 100 STM1722                                                | trpL | trp operon   | 1818411 |
| 100    | 0 | 93 STM1281                                                 |      | putative inr | 1357613 |
| 100    | 1 | 99 STM3197                                                 | glgS | glycogen b   | 3359314 |
| 100    | 1 | 100 STM3293                                                | secG | preprotein   | 3461852 |
| 100    | 1 | 100 STM0873                                                | ybjC | putative inr | 945507  |
| 100    | 0 | 98 STM0971                                                 |      | putative cy  | 1053604 |
| 100    | 0 | 65 STM0894                                                 |      | Fels-1 pro   | 963965  |
| 100    | 1 | 100 STM0719                                                |      | putative UI  | 784017  |
| 100    | 0 | 64.078 PSLT032                                             |      | putative di  | P22257  |
| 100    | 0 | 60 PSLT093                                                 |      | conjugative  | P73239  |
| 100    | 0 | 62.376 PSLT056                                             |      | putative cy  | P48285  |
| 100    | 0 | 57.282 PSLT102                                             | traS | conjugative  | P82685  |
| 100    | 0 | 64.356 PSLT080                                             | traK | conjugative  | P63899  |
| 100    | 0 | 63 PSLT008                                                 | srgC | sdiA-regul   | P03967  |
| 100    | 0 | 100 aSTM1828                                               |      |              |         |
| 100    | 0 | 63.889 PSLT108                                             | tral | conjugative  | P87282  |
| 100    | 1 | 100 STM0032                                                |      | putative an  | 35339   |
| 100    | 0 | 100 aSTM2043                                               |      |              |         |
| 100    | 0 | 100 aSTM2119                                               |      |              |         |
| 100    | 0 | 99 aSTM2210                                                |      |              |         |
| 100    | 0 | 100 aSTM0966                                               |      |              |         |
| 100    | 0 | 100 aSTM3181                                               |      |              |         |
| 100    | 0 | 100 aSTM3240                                               |      |              |         |
| 100    | 0 | 100 aSTM3331                                               |      |              |         |
| 100    | 0 | 62.5 aSTM1041 aSTM2594                                     |      |              |         |
|        | 0 |                                                            |      |              |         |
| 59.615 | 1 | 100                                                        |      |              |         |
| 57     | 1 | 100                                                        |      |              |         |
| 65.686 | 1 | 100                                                        |      |              |         |
| 93     | 1 | 100                                                        |      |              |         |
| 85     | 1 | 100                                                        |      |              |         |
| 59.615 | 1 | 100                                                        |      |              |         |
| 63     | 1 | 100                                                        |      |              |         |
| 93     | 1 | 100                                                        |      |              |         |
| 96     | 0 | 100                                                        |      | aSTM2717     |         |
| 95     | 0 | 100                                                        |      |              |         |
| 58.252 | 1 | 100                                                        |      |              |         |
| 53     | 1 | 100                                                        |      |              |         |
| 93     | 1 | 100                                                        |      |              |         |
| 89     | 1 | 100                                                        |      |              |         |
| 98     | 0 | 100 aSTM0946 aSTM1957; aSTM2471; aSTM3032; aSTM3479; aSTM4 |      |              |         |
| 59.813 | 1 | 100                                                        |      |              |         |
| 60.784 | 1 | 100                                                        |      |              |         |
| 63     | 1 | 100                                                        |      |              |         |
| 44     | 1 | 100                                                        |      |              |         |
| 100    | 1 | 100                                                        |      | aSTM2786     |         |
| 98     | 0 | 100 aSTM3688                                               |      |              |         |
| 100    | 0 | 100 aSTM2731                                               |      |              |         |
| 94     | 1 | 100                                                        |      |              |         |
| 66     | 1 | 100                                                        |      |              |         |
| 61.765 | 1 | 100                                                        |      |              |         |

|        |   |        |         |      |                       |
|--------|---|--------|---------|------|-----------------------|
| 61.111 | 1 | 100    |         |      |                       |
| 66.038 | 1 | 100    |         |      |                       |
| 61.468 | 1 | 100    |         |      |                       |
| 90     | 1 | 100    |         |      |                       |
| 59.434 | 1 | 100    |         |      |                       |
|        | 0 |        |         |      |                       |
|        | 0 |        |         |      |                       |
|        | 0 |        |         |      |                       |
|        | 0 |        |         |      |                       |
|        | 0 |        |         |      |                       |
| 100    | 0 | 100    | STM0703 | kdpD | sensory kir 767013    |
| 100    | 1 | 100    | STM3833 |      | putative mæ 4036632   |
| 100    | 1 | 100    | STM3856 | pstC | ABC super 4062490     |
| 100    | 1 | 100    | STM3888 | yieP | putative reç 4098947  |
| 100    | 1 | 100    | STM1778 | lolB | outer mem 1876024     |
| 100    | 1 | 100    | STM0111 | leuC | 3-isopropyl 129673    |
| 100    | 1 | 100    | STM0042 |      | putative so 50451     |
| 100    | 1 | 100    | STM0119 | yabB | putative cy 139947    |
| 100    | 1 | 100    | STM0150 | aroP | APC family 173380     |
| 100    | 0 | 76     | STM0176 | stiB | putative fir 207652   |
| 100    | 0 | 59.813 | STM0201 |      | putative ou 236264    |
| 100    | 1 | 100    | STM0238 | yaeP | putative cy 280294    |
| 100    | 1 | 100    | STM3346 | yhcM | putative AT 3513545   |
| 100    | 1 | 99     | STM3381 | yhdT | putative inr 3552034  |
| 100    | 1 | 100    | STM0647 | rlpB | a minor lipc 708520   |
| 100    | 1 | 100    | STM0671 | yleB | putative mc 736055    |
| 100    | 1 | 100    | STM0700 | potE | APC family 762063     |
| 100    | 1 | 100    | STM1962 | fliT | flagellar bic 2051227 |
| 100    | 1 | 100    | STM1285 | yeaG | putative Se 1361828   |
| 100    | 0 | 100    | STM2115 | wcaA | putative gly 2197971  |
| 100    | 1 | 100    | STM2718 |      | Fels-2 proç 2860745   |
| 100    | 0 | 61     | STM2750 |      | putative PT 2889221   |
| 100    | 0 | 60.784 | STM2766 |      | putative cy 2907785   |
| 100    | 1 | 100    | STM2792 | gabT | 4-aminobur 2941597    |
| 100    | 1 | 100    | STM4597 |      | putative pe 4854789   |
| 100    | 0 | 63.107 | STM0284 |      | putative sh 323396    |
| 100    | 0 | 76     | STM2760 |      | putative int 2900439  |
| 100    | 1 | 100    | STM1057 | pepN | aminopepti 1144141    |
| 100    | 1 | 100    | STM1495 | ynfl | putative co 1572274   |
| 100    | 1 | 100    | STM3452 | yheO | putative reç 3603872  |
| 100    | 1 | 100    | STM1060 |      | putative iro 1148676  |
| 100    | 1 | 100    | STM1456 | ydgO | putative ox 1530511   |
| 100    | 1 | 100    | STM3421 | rplO | 50S riboso 3587366    |
| 100    | 1 | 100    | STM3467 | yhfK | putative inr 3616326  |
| 100    | 1 | 100    | STM3500 | pckA | phosphoen 3656566     |
| 100    | 1 | 100    | STM1265 |      | putative reç 1347529  |
| 100    | 0 | 100    | STM1128 |      | putative so 1216441   |
| 100    | 1 | 100    | STM1199 | yceG | putative pe 1282612   |
| 100    | 1 | 100    | STM1218 | ycfV | ABC transç 1303871    |
| 100    | 1 | 100    | STM3542 | gntK | gluconate l 3711495   |
| 100    | 0 | 61.404 | STM1029 |      | Gifsy-2 pro 1115680   |

|     |   |        |          |          |               |         |
|-----|---|--------|----------|----------|---------------|---------|
| 100 | 0 | 79     | STM4202  |          | putative ph   | 4422817 |
| 100 | 1 | 100    | STM4057  |          | putative inr  | 4267930 |
| 100 | 1 | 100    | STM4090  | menA     | 1,4-dihydro   | 4298154 |
| 100 | 1 | 100    | STM4129  | trmA     | tRNA (urac    | 4346636 |
| 100 | 1 | 100    | STM2907  | pphB     | serine/thre   | 3048771 |
| 100 | 1 | 100    | STM4337  | ecnR     | putative ba   | 4580656 |
| 100 | 1 | 100    | STM2391  | fadL     | transport o   | 2502389 |
| 100 | 1 | 100    | STM0891  | artP     | ABC super     | 961043  |
| 100 | 1 | 100    | STM2472  | maeB     | paral putati  | 2579979 |
| 100 | 1 | 100    | STM2494  |          | putative inr  | 2607971 |
| 100 | 1 | 100    | STM2551  |          | putative inr  | 2689333 |
| 100 | 0 | 100    | STM4065  |          | putative pe   | 4275604 |
| 100 | 1 | 100    | STM4098  |          | putative ary  | 4306884 |
| 100 | 0 | 63.725 | STM2903  |          | putative cyf  | 3046317 |
| 100 | 1 | 100    | STM2926  | pcm      | L-isoaspart   | 3067858 |
| 100 | 1 | 100    | STM2953  | pyrG     | CTP synth     | 3098745 |
| 100 | 0 | 58.879 | STM0895  |          | Fels-1 prop   | 964573  |
| 100 | 0 | 61.468 | aSTM0912 | aSTM0911 |               |         |
| 100 | 0 | 68     | STM0928  | nanH     | sialidase (r  | 1002088 |
| 100 | 1 | 100    | STM1310  | nadE     | NAD synth     | 1390119 |
| 100 | 1 | 100    | STM1437  | ydhM     | putative tra  | 1514082 |
| 100 | 1 | 100    | STM1984  | yodD     | putative cyf  | 2068412 |
| 100 | 0 | 59.804 | STM4423  |          | putative Ar   | 4665886 |
| 100 | 1 | 100    | STM2285  | glpB     | sn-glycerol   | 2391854 |
| 100 | 1 | 100    | STM4499  | yeeN     | putative cyf  | 4752665 |
| 100 | 0 | 61.386 | STM4493  |          | putative cyf  | 4741372 |
| 100 | 0 | 100    | STM4518  |          | putative inr  | 4773762 |
| 100 | 1 | 100    | STM1136  | ycdX     | putative His  | 1226088 |
| 100 | 1 | 100    | STM1296  | ydjA     | putative ox   | 1374940 |
| 100 | 1 | 100    | STM1446  | ydhH     | putative cyf  | 1521107 |
| 100 | 1 | 100    | STM1470  | tus      | replication   | 1545400 |
| 100 | 1 | 100    | STM1476  | ydgC     | putative inr  | 1552147 |
| 100 | 1 | 100    | STM1154  | yceE     | putative MF   | 1241247 |
| 100 | 1 | 100    | STM2864  | sitD     | Salmonella    | 3008951 |
| 100 | 1 | 100    | STM1453  | nth      | endonuclea    | 1528557 |
| 100 | 1 | 100    | STM1990  | yedA     | putative pe   | 2072969 |
| 100 | 1 | 100    | STM2074  | hisB     | bifunctiona   | 2152994 |
| 100 | 1 | 100    | STM1298  | topB     | DNA topois    | 1376657 |
| 100 | 1 | 100    | STM1444  | slyA     | transcriptio  | 1519880 |
| 100 | 1 | 100    | STM1433  | ydhD     | putative glt  | 1511277 |
| 100 | 1 | 100    | STM1466  | ydgA     | putative pe   | 1539201 |
| 100 | 1 | 100    | STM1415  | ssaN     | Secretion s   | 1495691 |
| 100 | 1 | 100    | STM3875  | mioC     | initiation of | 4084166 |
| 100 | 1 | 100    | STM3782  |          | putative PT   | 3982230 |
| 100 | 1 | 100    | STM2578  | pdxJ     | carries out   | 2722442 |
| 100 | 1 | 100    | STM0398  | phoR     | sensory kir   | 451554  |
| 100 | 1 | 100    | STM4183  | aceB     | malate syn    | 4402039 |
| 100 | 1 | 100    | STM0069  | caiE     | stimulates    | 81020   |
| 100 | 1 | 100    | STM1322  | yniC     | putative en   | 1402340 |
| 100 | 1 | 100    | STM1330  |          | putative DM   | 1408531 |
| 100 | 1 | 100    | STM1981  | fliR     | putative fla  | 2066351 |
| 100 | 1 | 100    | STM1462  | ydgJ     | putative ox   | 1536306 |

|     |   |        |         |         |                     |             |         |
|-----|---|--------|---------|---------|---------------------|-------------|---------|
| 100 | 1 | 100    | STM1489 | ynfK    | putative de         | 1566447     |         |
| 100 | 1 | 100    | STM2371 | flk     | Couples fla         | 2483595     |         |
| 100 | 1 | 100    | STM2573 |         | putative ke         | 2718475     |         |
| 100 | 0 | 60.194 | STM2617 |         | Gifsy-1 pro         | 2762900     |         |
| 100 | 1 | 100    | STM3180 | ygiN    | putative cy         | 3343523     |         |
| 100 | 1 | 100    | STM3570 | ftsE    | putative AT         | 3738075     |         |
| 100 | 1 | 100    | STM3482 | gph     | phosphogly          | 3637244     |         |
| 100 | 1 | 100    | STM0346 |         | putative ou         | 390388      |         |
| 100 | 1 | 100    | STM1382 | orf408  | putative re         | 1464806     |         |
| 100 | 1 | 100    | STM0465 | ybaY    | glycoprotei         | 523355      |         |
| 100 | 1 | 100    | STM0559 | rfbl    | putative gly        | 617360      |         |
| 100 | 1 | 100    | STM4414 | ppa     | inorganic p         | 4654741     |         |
| 100 | 1 | 100    | STM4532 | yjiY    | putative ca         | 4787565     |         |
| 100 | 1 | 100    | STM3189 | ygiD    | putative cy         | 3352157     |         |
| 100 | 1 | 100    | STM3219 | fadH    | 2,4-dieonyl         | 3386255     |         |
| 100 | 1 | 99     | STM3221 | ygiP    | putative m          | 3389576     |         |
| 100 | 1 | 100    | STM3491 | yrfC    | putative inr        | 3645214     |         |
| 100 | 1 | 100    | STM2338 | pta     | phosphotra          | 2449218     |         |
| 100 | 1 | 100    | STM2553 | csiE    | stationary p        | 2691074     |         |
| 100 | 1 | 100    | STM0529 | fdrA    | putative ac         | 591360      |         |
| 100 | 1 | 100    | STM0528 | allD    | ureidoglycc         | 589980      |         |
| 100 | 1 | 100    | STM2909 | mutS    | methyl-dire         | 3050279     |         |
| 100 | 1 | 100    | STM4060 | cpxP    | periplasmic         | 4270595     |         |
| 100 | 1 | 100    | STM0663 | gltK    | ABC super           | 727335      |         |
| 100 | 1 | 100    | STM3406 | def     | peptide def         | 3576936     |         |
| 100 | 1 | 100    | STM2582 | lepB    | leader pep          | 2725781     |         |
| 100 | 1 | 100    | STM2078 | hisl    | bifunctiona         | 2156140     |         |
| 100 | 1 | 100    | STM4009 | typA    | GTP-bindir          | 4217384     |         |
| 100 | 1 | 100    | STM0879 | potH    | ABC super           | 950728      |         |
| 100 | 1 | 100    | STM3410 | mscL    | mechanos            | 3581289     |         |
| 100 | 0 | 77     | STM2772 | hin     | H inversion         | 2914842     |         |
| 100 | 1 | 100    | STM1184 | flgL    | flagellar bic       | 1267144     |         |
| 100 | 1 | 100    | STM2580 | era     | GTPase be           | 2723925     |         |
| 100 | 1 | 100    | STM3614 | dctA    | DAACS far           | 3790270     |         |
| 100 | 1 | 100    | STM2555 | glyA    | serine hydr         | 2693681     |         |
| 100 | 1 | 100    |         | STM1124 | putA                | bifunctiona | 1208415 |
| 100 | 1 | 100    | STM1467 | manA    | mannose- $\epsilon$ | 1540812     |         |
| 100 | 1 | 100    | STM0867 |         | putative hy         | 939781      |         |
| 100 | 1 | 100    | STM0836 | ybiR    | putative Di         | 902741      |         |
| 100 | 1 | 99     | STM1858 |         | putative cy         | 1955796     |         |
| 100 | 1 | 100    | STM2173 |         | putative cy         | 2270456     |         |
| 100 | 1 | 100    | STM0725 |         | putative gly        | 790885      |         |
| 100 | 1 | 100    | STM4304 | dcuS    | sensory his         | 4549893     |         |
| 100 | 1 | 100    | STM1938 | yecA    | putative m          | 2031686     |         |
| 100 | 1 | 100    | STM1679 | mppA    | periplasmic         | 1771997     |         |
| 100 | 1 | 100    | STM1688 | pspC    | phage sho           | 1781104     |         |
| 100 | 1 | 100    | STM4262 |         | putative AE         | 4499193     |         |
| 100 | 1 | 100    | STM0048 | slpA    | FKBP-type           | 57344       |         |
| 100 | 1 | 100    | STM1025 |         | Gifsy-2 pro         | 1113125     |         |
| 100 | 1 | 100    | STM1649 |         | putative cy         | 1741583     |         |
| 100 | 1 | 100    | STM4019 | yihQ    | putative al         | 4228665     |         |
| 100 | 1 | 100    | STM3567 | livJ    | ABC super           | 3734502     |         |



|     |   |                |          |               |               |
|-----|---|----------------|----------|---------------|---------------|
| 100 | 0 | 99 STM2728     |          | Fels-2 pro    | 2869927       |
| 100 | 0 | 100 aSTM0291   | aSTM0292 |               |               |
| 100 | 1 | 100 STM2436    | ptsJ     | putative re   | 2548503       |
| 100 | 1 | 100 STM1903    | yecE     | putative cy   | 1997771       |
| 100 | 1 | 100 STM4260    |          | membrane      | 4481180       |
| 100 | 1 | 100 STM3019    | yqeF     | putative ac   | 3179658       |
| 100 | 1 | 100 STM3209    | rpsU     | 30S riboso    | 3374055       |
| 100 | 1 | 100 STM2877    | iagB     | cell invasio  | 3021535       |
| 100 | 1 | 100 STM3968    | udp      | uridine pho   | 4174864       |
| 100 | 1 | 100 STM3838    | dnaA     | DNA replic    | 4043624       |
| 100 | 1 | 100 STM3063    | rpiA     | ribosephos    | 3224777       |
| 100 | 1 | 100 STM3929    | wecG     | putative UI   | 4138473       |
| 100 | 1 | 100 STM3100    | yggS     | putative en   | 3260944       |
| 100 | 1 | 100 STM4152    | rplL     | 50S riboso    | 4365225       |
| 100 | 1 | 99 STM0543     | fimA     | major type    | 604115        |
| 100 | 1 | 100 STM1916    | cheY     | chemotaxis    | 2012283       |
| 100 | 1 | 100 STM4004    | hemN     | O2-indeper    | 4211171       |
| 100 | 1 | 100 STM3014    | lysR     | positive tra  | 3174075       |
| 100 | 1 | 100 STM4011    |          | putative inr  | 4219981       |
| 100 | 1 | 100 STM3947    | dapF     | diaminopir    | 4152259       |
| 100 | 0 | 100 STM3899    | yifB     | putative m    | 4106863       |
| 100 | 0 | 100 STM1959    | aSTM2771 | fliC          | flagellar bic |
| 100 | 1 | 100 STM2946    | cysH     | 3'-phospho    | 3088189       |
| 100 | 1 | 100 STM1567    | adhP     | alcohol def   | 1647794       |
| 100 | 1 | 100 STM1610    | ydcK     | putative nu   | 1700065       |
| 100 | 1 | 100 STM1646    | ydbH     | putative pe   | 1737153       |
| 100 | 1 | 100 STM1671    |          | putative ba   | 1764396       |
| 100 | 1 | 100 STM1542    |          | putative zir  | 1617320       |
| 100 | 1 | 100 STM1510    | ydfH     | putative re   | 1587986       |
| 100 | 1 | 100 STM1000    | asnS     | asparagine    | 1091479       |
| 100 | 1 | 100 STM0590    | fepC     | ABC s+upe     | 650785        |
| 100 | 1 | 100 STM0339    | stbB     | putative fir  | 383580        |
| 100 | 1 | 100 STM1741    |          | putative vo   | 1834739       |
| 100 | 1 | 100 STM1589    | yncB     | putative N/   | 1677096       |
| 100 | 1 | 100 STM1835    | rrmA     | 23S rRNA      | 1932707       |
| 100 | 0 | 58.252 STM1629 |          | putative dip  | 1719621       |
| 100 | 1 | 100 STM1884    | eda      | multifuncti   | 1976942       |
| 100 | 1 | 100 STM1932    | ftnB     | ferritin-like | 2027240       |
| 100 | 1 | 100 STM0515    | allA     | ureidoglycc   | 576003        |
| 100 | 1 | 100 STM0537    | cysS     | cysteine tR   | 599135        |
| 100 | 0 | 66.337 STM0572 |          | putative ph   | 632187        |
| 100 | 1 | 100 STM0393    | yajF     | putative su   | 443966        |
| 100 | 1 | 100 STM3150    | hypO     | putative Ni/  | 3312644       |
| 100 | 1 | 100 STM2831    | mltB     | membrane      | 2976975       |
| 100 | 1 | 100 STM3632    |          | putative PC   | 3817968       |
| 100 | 1 | 99 STM4509     |          | putative cy   | 4763557       |
| 100 | 1 | 100 STM2395    | pgtE     | Phosphogl     | 2506055       |
| 100 | 1 | 100 STM3765    | yicL     | putative pe   | 3965692       |
| 100 | 1 | 100 STM2992    | argA     | N-alpha-ac    | 3142842       |
| 100 | 1 | 100 STM3026    |          | putative ou   | 3186654       |
| 100 | 1 | 100 STM3105    | yggM     | putative pe   | 3264341       |
| 100 | 1 | 100 STM0464    | tesB     | acyl-CoA t    | 522280        |

|     |   |        |         |      |              |         |
|-----|---|--------|---------|------|--------------|---------|
| 100 | 1 | 100    | STM2803 |      | putative re  | 2949731 |
| 100 | 1 | 100    | STM3725 | kdtB | phosphopa    | 3920624 |
| 100 | 1 | 100    | STM2972 | exo  | exonucleas   | 3123597 |
| 100 | 1 | 100    | STM3018 | kdul | putative pe  | 3178392 |
| 100 | 0 | 64.706 | STM3081 |      | putative m   | 3242326 |
| 100 | 1 | 100    | STM3125 |      | putative cy  | 3284877 |
| 100 | 1 | 100    | STM2829 | recA | DNA stranc   | 2974854 |
| 100 | 1 | 100    | STM2117 | wzb  | putative pr  | 2201056 |
| 100 | 0 | 100    | STM2243 |      | putative tai | 2343920 |
| 100 | 1 | 100    | STM3712 | rfaC | heptosyl tr  | 3907297 |
| 100 | 1 | 100    | STM3436 | rpsS | 30S riboso   | 3593508 |
| 100 | 1 | 100    | STM3329 | yhcC | putative Fe  | 3492922 |
| 100 | 1 | 100    | STM3251 |      | putative su  | 3420480 |
| 100 | 1 | 100    | STM3592 | yhiP | putative PC  | 3761614 |
| 100 | 1 | 100    | STM0951 |      | putative cy  | 1028376 |
| 100 | 1 | 100    | STM4444 |      | putative inr | 4685766 |
| 100 | 1 | 100    | STM4570 | deoD | purine-nucl  | 4825141 |
| 100 | 0 | 64.706 | STM0352 |      | putative ca  | 397057  |
| 100 | 1 | 99     | STM1300 |      | putative pe  | 1380218 |
| 100 | 1 | 100    | STM4328 | yjeH | putative tra | 4573257 |
| 100 | 1 | 100    | STM2819 | yqaA | putative inr | 2968568 |
| 100 | 1 | 100    | STM2196 |      | putative D-  | 2292681 |
| 100 | 0 | 80     | STM2233 |      | putative cy  | 2334013 |
| 100 | 1 | 100    | STM2151 | stcB | putative pe  | 2246358 |
| 100 | 1 | 100    | STM2179 |      | putative su  | 2275398 |
| 100 | 1 | 100    | STM1400 | sseC | Secretion s  | 1484997 |
| 100 | 1 | 100    | STM1069 | ycbG | putative cy  | 1160441 |
| 100 | 0 | 61.765 | STM0764 |      | transcriptio | 827344  |
| 100 | 1 | 100    | STM0834 | ybiP | putative Int | 900112  |
| 100 | 1 | 100    | STM1302 | xthA | exonucleas   | 1380942 |
| 100 | 1 | 100    | STM3250 | garD | galactarate  | 3418669 |
| 100 | 1 | 100    | STM0815 | ybhR | putative AE  | 879613  |
| 100 | 1 | 100    | STM3056 | visC | putative m   | 3217137 |
| 100 | 1 | 100    | STM1958 | fliB | N-methylat   | 2046374 |
| 100 | 1 | 100    | STM3224 | ygiT | putative re  | 3392277 |
| 100 | 1 | 100    | STM3075 |      | putative AE  | 3235693 |
| 100 | 1 | 99     | STM1097 |      | putative pe  | 1184453 |
| 100 | 1 | 100    | STM2875 | hilD | regulatory I | 3017836 |
| 100 | 1 | 100    | STM3758 | fidL | putative inr | 3957723 |
| 100 | 1 | 100    | STM3167 |      | putative dia | 3327928 |
| 100 | 1 | 100    | STM1406 | ssaG | Secretion s  | 1489537 |
| 100 | 1 | 100    | STM1107 | hpaX | 4-hydroxyp   | 1194036 |
| 100 | 1 | 100    | STM0778 | modF | putative AE  | 842899  |
| 100 | 1 | 100    | STM2484 |      | putative inr | 2598849 |
| 100 | 1 | 100    | STM2539 | hscA | chaperone    | 2678197 |
| 100 | 1 | 100    | STM2482 | yffB | putative glu | 2597334 |
| 100 | 1 | 100    | STM0480 | ybaM | putative inr | 538935  |
| 100 | 1 | 100    | STM1797 | ymgE | putative tra | 1896845 |
| 100 | 1 | 100    | STM4194 | yjbD | putative cy  | 4416345 |
| 100 | 1 | 100    | STM4531 | yjiX | putative cy  | 4787267 |
| 100 | 1 | 100    | STM3525 | glpE | thiosulfate/ | 3688206 |
| 100 | 1 | 100    | STM3565 | yhhK | putative ac  | 3733924 |

|        |   |        |          |          |              |              |         |
|--------|---|--------|----------|----------|--------------|--------------|---------|
| 100    | 1 | 100    | STM4314  |          | putative ba  | 4560598      |         |
| 100    | 0 | 69     | STM4218  |          | putative inr | 4437125      |         |
| 100    | 1 | 100    | STM2731  |          | Fels-2 proç  | 2873542      |         |
| 100    | 1 | 100    | STM3658  |          | putative inr | 3843367      |         |
| 100    | 0 | 55.34  | STM4574  |          | putative ou  | 4829674      |         |
| 100    | 1 | 100    | STM0318  |          | putative hy  | 363226       |         |
| 100    | 1 | 100    | STM0004  |          | thrC         | threonine s  | 3734    |
| 100    | 1 | 100    | STM1485  |          | acid shock   | 1562058      |         |
| 100    | 0 | 100    |          | STM1438  | ydhL         | putative ox  | 1514784 |
| 100    | 1 | 100    | STM0030  |          | putative tra | 33364        |         |
| 100    | 1 | 100    | STM0064  |          | dapB         | dihydrodipi  | 74017   |
| 100    | 0 | 100    | STM0031  |          | putative tra | 34376        |         |
| 100    | 1 | 100    | STM0034  |          | putative ou  | 38773        |         |
| 100    | 1 | 100    | STM1159  |          | yceO         | putative inr | 1246267 |
| 100    | 0 | 60.55  | STM2508  |          | putative cyI | 2621943      |         |
| 100    | 1 | 100    | STM3272  |          | yhbS         | putative AE  | 3439035 |
| 100    | 1 | 100    | STM3232  |          | yqjF         | putative mε  | 3397945 |
| 100    | 0 | 57.282 | STM0899  |          | Fels-1 proç  | 969473       |         |
| 100    | 1 | 99     | STM0987  |          | ycaR         | putative inr | 1074485 |
| 100    | 0 | 64.356 | STM0919  |          | Fels-1 proç  | 991786       |         |
| 100    | 1 | 100    | STM0757  |          | pnuC         | NMN famil    | 821301  |
| 100    | 0 | 61.538 | PSLT053  |          | parB         | plasmid pa   | P45019  |
| 100    | 0 | 64.356 | PSLT101  |          | traG         | conjugative  | P79847  |
| 100    | 0 | 62.617 | PSLT065  |          | pseudogen    | P53912       |         |
| 100    | 0 | 62.376 | PSLT077  |          | traA         | conjugative  | P62636  |
| 100    | 0 | 65.686 | PSLT017  |          | pefC         | plasmid-en   | P10933  |
| 100    | 0 | 59.434 | PSLT014  |          | orf6         | putative ou  | P08548  |
| 100    | 0 | 65.686 | PSLT059  |          | putative ad  | P49486       |         |
| 100    | 1 | 100    | STM1919  |          | cheM         | methyl acc   | 2014756 |
| 100    | 0 | 100    | aSTM0038 |          |              |              |         |
| 100    | 0 | 99     | aSTM0101 |          |              |              |         |
| 100    | 0 | 100    | aSTM0234 |          |              |              |         |
| 100    | 1 | 100    | STM0291  |          | putative Rf  | 332551       |         |
| 100    | 0 | 100    | aSTM0973 |          |              |              |         |
| 100    | 0 | 100    | aSTM1005 |          |              |              |         |
| 100    | 0 | 62.376 | aSTM1032 |          |              |              |         |
| 100    | 0 | 62.376 | aSTM1038 |          |              |              |         |
| 100    | 0 | 100    | aSTM3391 |          |              |              |         |
| 0      |   |        |          |          |              |              |         |
| 62.136 | 1 | 100    |          |          |              |              |         |
| 100    | 1 | 100    |          | aSTM3923 |              |              |         |
| 62     | 1 | 100    |          |          |              |              |         |
| 87     | 0 | 100    |          |          |              |              |         |
| 59.091 | 1 | 100    |          |          |              |              |         |
| 100    | 1 | 100    |          | aSTM1515 |              |              |         |
| 60.194 | 1 | 100    |          |          |              |              |         |
| 60.577 | 1 | 100    |          |          |              |              |         |
| 99     | 0 | 100    |          | aSTM2492 |              |              |         |
| 64.706 | 1 | 100    |          |          |              |              |         |
| 54.902 | 1 | 100    |          |          |              |              |         |
| 57.944 | 1 | 100    |          |          |              |              |         |
| 61.765 | 1 | 100    |          |          |              |              |         |

|        |   |     |
|--------|---|-----|
| 61.538 | 1 | 100 |
| 87     | 0 | 100 |
| 62.376 | 1 | 100 |
| 83     | 1 | 100 |
| 98     | 1 | 100 |
| 64.423 | 1 | 100 |
| 59     | 1 | 100 |
| 61     | 1 | 100 |
| 64.706 | 1 | 100 |
| 61.321 | 1 | 100 |
| 64.762 | 1 | 100 |
| 46     | 1 | 100 |
| 58.252 | 1 | 100 |
| 65.385 | 1 | 100 |
| 59.615 | 1 | 100 |
| 63.462 | 1 | 100 |
| 55.34  | 1 | 100 |

0  
0  
0  
0  
0  
0

|     |   |        |         |
|-----|---|--------|---------|
| 100 | 1 | 100    | STM2895 |
| 100 | 1 | 100    | STM0488 |
| 100 | 1 | 100    | STM2027 |
| 100 | 1 | 100    | STM3788 |
| 100 | 1 | 100    | STM0060 |
| 100 | 1 | 100    | STM0090 |
| 100 | 1 | 100    | STM0231 |
| 100 | 1 | 100    | STM3306 |
| 100 | 1 | 100    | STM3344 |
| 100 | 1 | 100    | STM3377 |
| 100 | 1 | 100    | STM0639 |
| 100 | 1 | 100    | STM0662 |
| 100 | 1 | 100    | STM0169 |
| 100 | 1 | 100    | STM0188 |
| 100 | 1 | 100    | STM0224 |
| 100 | 1 | 100    | STM1508 |
| 100 | 1 | 100    | STM1540 |
| 100 | 0 | 60     | STM3830 |
| 100 | 1 | 100    | STM3569 |
| 100 | 1 | 100    | STM4559 |
| 100 | 1 | 99     | STM0257 |
| 100 | 1 | 100    | STM0309 |
| 100 | 0 | 59.406 | STM0332 |
| 100 | 1 | 100    | STM1068 |
| 100 | 0 | 100    | STM2720 |
| 100 | 0 | 58.416 | STM0294 |
| 100 | 0 | 93     | STM2768 |
| 100 | 1 | 100    | STM1073 |
| 100 | 1 | 100    | STM1119 |

|       |              |         |
|-------|--------------|---------|
| invB  | surface pre  | 3037969 |
| adk   | adenylate k  | 546041  |
| cbiH  | synthesis c  | 2105999 |
| uhpC  | membrane     | 3987714 |
| citE2 | putative cit | 70000   |
| ksgA  | S-adenosyl   | 102663  |
| dnaE  | DNA polym    | 269548  |
| nlp   | regulatory f | 3474550 |
| rpsI  | 30S riboso   | 3512406 |
|       | putative nit | 3548098 |
| mrdB  | rod shape-   | 700908  |
| gltL  | ABC super    | 726610  |
| gcd   | glucose de   | 198220  |
| ligT  | 2'-5' RNA li | 217751  |
| yaeT  | putative ou  | 262379  |
| ydfI  | putative m   | 1586069 |
|       | putative hy  | 1615333 |
| dgoR  | galactonate  | 4033255 |
| ftsX  | putative int | 3737027 |
| yjjG  | putative ha  | 4813116 |
|       | putative dru | 296912  |
| yafH  | putative ac  | 352597  |
|       | putative hy  | 375715  |
| lonH  | putative pro | 1158495 |
|       | Fels-2 pro   | 2861960 |
|       | putative cy  | 338838  |
|       | putative tra | 2910681 |
| yccS  | putative eff | 1163692 |
| wraB  | trp-repress  | 1205223 |

|     |   |        |         |          |              |         |
|-----|---|--------|---------|----------|--------------|---------|
| 100 | 1 | 100    | STM1156 | yceA     | putative en  | 1243756 |
| 100 | 1 | 100    | STM3994 | mobA     | putative mc  | 4202196 |
| 100 | 1 | 100    | STM1104 | hpaF     | 4-hydroxyp   | 1191836 |
| 100 | 1 | 100    | STM1138 | ycdZ     | putative inr | 1227456 |
| 100 | 1 | 100    | STM1196 | acpP     | acyl carrier | 1280113 |
| 100 | 1 | 100    | STM1216 | mfd      | transcriptio | 1298895 |
| 100 | 1 | 100    | STM3538 | glgB     | 1,4-alpha-ç  | 3706095 |
| 100 | 1 | 100    | STM1150 | mdoG     | periplasmic  | 1236418 |
| 100 | 1 | 100    | STM3495 | yrfF     | putative inr | 3650187 |
| 100 | 0 | 63     | STM3519 | rtcB     | putative cyf | 3681363 |
| 100 | 1 | 100    | STM1283 | yeaJ     | putative Me  | 1358285 |
| 100 | 1 | 100    | STM4012 |          | putative co  | 4220856 |
| 100 | 1 | 100    | STM4087 | glpF     | MIP chann    | 4295871 |
| 100 | 0 | 57.009 | STM4196 |          | putative cyf | 4417918 |
| 100 | 0 | 85     | STM4212 |          | putative ph  | 4433440 |
| 100 | 1 | 100    | STM4268 | yjcD     | putative xa  | 4506146 |
| 100 | 1 | 100    | STM4305 |          | putative an  | 4551958 |
| 100 | 0 | 75     | STM2941 | yghJ     | putative cyf | 3080843 |
| 100 | 1 | 100    | STM0889 | artQ     | ABC super    | 959571  |
| 100 | 1 | 100    | STM2415 | gltX     | glutamate t  | 2530163 |
| 100 | 0 | 65.714 | STM0917 |          | Fels-1 prop  | 988336  |
| 100 | 1 | 100    | STM0939 | ybjD     | homology v   | 1015860 |
| 100 | 1 | 100    | STM1002 |          | putatiave d  | 1093858 |
| 100 | 0 | 61.765 | STM4199 |          | putative cyf | 4419834 |
| 100 | 0 | 70.588 | STM4110 | ptsA     | General PT   | 4324491 |
| 100 | 1 | 100    | STM4290 | proP     | MFS family   | 4530970 |
| 100 | 1 | 100    | STM4334 | efp      | elongation   | 4579610 |
| 100 | 1 | 100    | STM2383 | mepA     | murein DD    | 2493713 |
| 100 | 1 | 100    | STM2423 | yfeN     | putative ou  | 2535947 |
| 100 | 1 | 100    | STM2476 | ypfG     | putative pe  | 2585921 |
| 100 | 0 | 100    | STM2506 | aSTM2505 | putative inr | 2621211 |
| 100 | 1 | 100    | STM2876 | hilA     | invasion ge  | 3019856 |
| 100 | 1 | 100    | STM4351 |          | putative arç | 4595404 |
| 100 | 1 | 100    | STM4392 | priB     | primosoma    | 4630916 |
| 100 | 1 | 100    | STM2259 | napA     | periplasmic  | 2356418 |
| 100 | 0 | 100    | STM4482 | idnT     | GntP famil   | 4725793 |
| 100 | 1 | 100    | STM2335 | yfbU     | putative cyf | 2446567 |
| 100 | 1 | 100    | STM2326 | nuoC     | NADH deh     | 2436488 |
| 100 | 0 | 73     | STM4534 |          | putative Nt  | 4792067 |
| 100 | 1 | 100    | STM1954 | fliY     | putative pe  | 2043190 |
| 100 | 1 | 100    | STM3443 | bfr      | bacteriofer  | 3597374 |
| 100 | 1 | 100    | STM1074 | yccF     | putative inr | 1165864 |
| 100 | 1 | 100    | STM1222 | potD     | ABC super    | 1307678 |
| 100 | 1 | 100    | STM2468 | eutQ     | putative etf | 2577356 |
| 100 | 1 | 100    | STM1225 | potB     | ABC super    | 1311183 |
| 100 | 1 | 100    | STM1328 |          | putative ou  | 1407118 |
| 100 | 1 | 100    | STM4371 | yjfJ     | putative Ph  | 4614875 |
| 100 | 1 | 100    | STM4405 | ytfJ     | putative tra | 4642501 |
| 100 | 0 | 75     | STM4428 |          | putative pe  | 4671190 |
| 100 | 1 | 100    | STM1145 | csgC     | putative cu  | 1232147 |
| 100 | 1 | 100    | STM1862 | pagO     | PhoPQ-act    | 1959507 |
| 100 | 1 | 100    | STM1751 | hns      | DNA-bindir   | 1847283 |

|     |   |        |         |         |               |              |         |
|-----|---|--------|---------|---------|---------------|--------------|---------|
| 100 | 1 | 100    | STM1173 | flgA    | flagellar bic | 1257431      |         |
| 100 | 0 | 74     | STM2087 | rfbV    | LPS side c    | 2167619      |         |
| 100 | 1 | 100    | STM3796 | ilvB    | acetolactat   | 3995917      |         |
| 100 | 1 | 100    | STM3864 | atpC    | membrane      | 4073671      |         |
| 100 | 1 | 100    | STM2641 | nadB    | quinolinate   | 2780428      |         |
| 100 | 1 | 100    | STM0243 | yaeB    | paral putati  | 284296       |         |
| 100 | 1 | 100    | STM0094 | djIA    | DnaJ like c   | 108424       |         |
| 100 | 1 | 100    | STM2382 | yfcA    | putative pe   | 2492904      |         |
| 100 | 1 | 100    | STM1344 | ydiV    | putative Di   | 1422798      |         |
| 100 | 1 | 100    | STM1348 | ydiA    | putative inr  | 1426600      |         |
| 100 | 1 | 100    | STM0999 | ompF    | outer mem     | 1089781      |         |
| 100 | 1 | 100    | STM3562 | livM    | ABC super     | 3730133      |         |
| 100 | 1 | 100    | STM1412 | ssaL    | Secretion s   | 1492229      |         |
| 100 | 1 | 100    | STM2257 | napH    | ferredoxin-   | 2354860      |         |
| 100 | 0 | 99     | STM0279 | STM0276 | putative cy   | 318679       |         |
| 100 | 1 | 100    | STM4556 | rsmC    | 16S rRNA      | 4811138      |         |
| 100 | 1 | 100    | STM3644 | bisC    | biotin sulfo  | 3830320      |         |
| 100 | 1 | 100    | STM3257 |         | putative ta   | 3426829      |         |
| 100 | 1 | 100    | STM3281 | nlpl    | lipoprotein,  | 3448253      |         |
| 100 | 1 | 100    | STM2414 | yfeD    | putative ne   | 2529717      |         |
| 100 | 0 | 100    |         | STM2521 | yfgM          | putative inr | 2654237 |
| 100 | 1 | 100    | STM0510 | sfbA    | putative AE   | 571112       |         |
| 100 | 1 | 100    | STM0606 | ybdO    | putative tra  | 668043       |         |
| 100 | 0 | 59.434 | STM2603 |         | Gifsy-1 pro   | 2750893      |         |
| 100 | 1 | 100    | STM4576 | lplA    | lipoate-pro   | 4831413      |         |
| 100 | 1 | 100    | STM3667 | yiaJ    | transcriptio  | 3854609      |         |
| 100 | 1 | 100    | STM3606 | yhjB    | putative tra  | 3779468      |         |
| 100 | 1 | 100    | STM3602 |         | putative re   | 3774529      |         |
| 100 | 0 | 74     | STM3277 |         | putative inr  | 3443318      |         |
| 100 | 1 | 100    | STM4457 |         | putative tra  | 4702512      |         |
| 100 | 1 | 100    | STM1379 | orf48   | putative an   | 1461740      |         |
| 100 | 1 | 100    | STM4293 | yjdB    | putative int  | 4534384      |         |
| 100 | 1 | 100    | STM1169 | mviM    | putative vir  | 1253776      |         |
| 100 | 1 | 100    | STM2458 | eutB    | ethanolami    | 2567251      |         |
| 100 | 1 | 100    | STM4028 | yihZ    | D-Tyr-tRN/    | 4238211      |         |
| 100 | 1 | 100    | STM0633 | lipA    | lipoate synt  | 694862       |         |
| 100 | 1 | 98     | STM1420 | ssaS    | Secretion s   | 1499388      |         |
| 100 | 1 | 100    | STM2035 | cbiA    | synthesis c   | 2112422      |         |
| 100 | 1 | 100    | STM3699 | cysE    | serine acet   | 3894118      |         |
| 100 | 1 | 100    | STM0811 | ybhN    | putative ne   | 876150       |         |
| 100 | 1 | 100    | STM0783 | modC    | ABC super     | 847140       |         |
| 100 | 1 | 100    | STM1378 | pykF    | pyruvate ki   | 1459926      |         |
| 100 | 1 | 100    | STM2351 | hisP    | ABC super     | 2462131      |         |
| 100 | 1 | 100    | STM0113 | leuA    | 2-isopropyl   | 132167       |         |
| 100 | 1 | 100    | STM0209 | htrA    | periplasmic   | 244492       |         |
| 100 | 1 | 100    | STM0451 | hupB    | DNA-bindir    | 508105       |         |
| 100 | 1 | 100    | STM3409 | trkA    | Trk system    | 3579771      |         |
| 100 | 1 | 100    | STM2881 | iacP    | putative ac   | 3024412      |         |
| 100 | 1 | 100    | STM0546 | fimD    | outer mem     | 606048       |         |
| 100 | 1 | 100    | STM0729 | abrB    | putative tra  | 794771       |         |
| 100 | 1 | 100    | STM0739 | sucD    | succinyl-C    | 807077       |         |
| 100 | 1 | 100    | STM4174 | hydG    | response r    | 4389839      |         |

|     |   |                |                   |               |         |
|-----|---|----------------|-------------------|---------------|---------|
| 100 | 1 | 100 STM3593    | yhiQ              | putative SA   | 3763175 |
| 100 | 1 | 100 STM2040    | pduC              | Propanedic    | 2117958 |
| 100 | 0 | 100 STM2883    | sipD              | cell invasio  | 3026755 |
| 100 | 1 | 100 STM2322    | nuoH              | NADH deh      | 2430920 |
| 100 | 1 | 100 STM3364    | yhcP              | putative inr  | 3530000 |
| 100 | 0 | 100            | STM4257; aSTM4258 | putative inr  | 4477857 |
| 100 | 1 | 100 STM2669    | tyrA              | bifunctiona   | 2810344 |
| 100 | 1 | 100 STM1140    | csgF              | curli produc  | 1228885 |
| 100 | 1 | 100 STM4024    | yihV              | putative su   | 4234825 |
| 100 | 1 | 100 STM4169    | yjaG              | putative cyf  | 4385932 |
| 100 | 1 | 100 STM2846    | hycH              | processing    | 2992168 |
| 100 | 1 | 100 STM4017    | yihO              | putative Gf   | 4225770 |
| 100 | 1 | 100 STM0670    | miaB              | methylthiol   | 734487  |
| 100 | 1 | 100 STM0456    | ybaE              | putative AE   | 512430  |
| 100 | 1 | 100 STM4277    | nrfA              | nitrite redu  | 4516104 |
| 100 | 1 | 100 STM1669    |                   | homology t    | 1761200 |
| 100 | 1 | 100 STM3383    | prmA              | methylator    | 3553729 |
| 100 | 1 | 100 STM2988    | mltA              | membrane      | 3139759 |
| 100 | 1 | 100 STM2916    | ygbL              | putative fuc  | 3058813 |
| 100 | 1 | 100 STM4058    | cpxA              | sensory kir   | 4268376 |
| 100 | 1 | 100 STM0864    | deoR              | transcriptio  | 936744  |
| 100 | 1 | 99 STM3943     | cyaY              | putative Fr   | 4150547 |
| 100 | 1 | 100 STM3904    | ilvD              | dihydroxya    | 4111987 |
| 100 | 1 | 100 STM0073    | caiA              | putative ac   | 85509   |
| 100 | 1 | 100 STM3902    | ilvM              | acetolactat   | 4110619 |
| 100 | 0 | 100 STM2524    | yfgA              | paral putati  | 2657401 |
| 100 | 1 | 100 STM1814    | minC              | cell divisior | 1912087 |
| 100 | 1 | 100 STM1730    | yciE              | putative cyf  | 1826407 |
| 100 | 1 | 100 STM2974    | fucA              | L-fucose-     | 3125669 |
| 100 | 1 | 100 STM2936    | iap               | aminopepti    | 3075550 |
| 100 | 0 | 100 STM3963    | aSTM3964 yigM     | paral putati  | 4167773 |
| 100 | 1 | 100 STM3938    | hemC              | porphobilin   | 4145049 |
| 100 | 1 | 100 STM4147    | secE              | preprotein    | 4362017 |
| 100 | 1 | 100 STM1826    | sdaA              | L-serine de   | 1923379 |
| 100 | 1 | 100 STM1771    | chaA              | CaCA fami     | 1869253 |
| 100 | 1 | 100 STM1781    | yhcM              | putative Su   | 1878857 |
| 100 | 1 | 100 STM1832    | manZ              | Sugar Spe     | 1930358 |
| 100 | 1 | 100 STM1874    |                   | putative inr  | 1968666 |
| 100 | 1 | 100 STM1901    | aspS              | aspartate tl  | 1995111 |
| 100 | 1 | 100 STM0518    | gip               | glyoxylate    | 579261  |
| 100 | 0 | 99 STM0540     | ybcI              | putative me   | 601815  |
| 100 | 0 | 100 STM0567    |                   | putative AT   | 622698  |
| 100 | 1 | 100 STM1584    | ansP              | APC family    | 1670649 |
| 100 | 1 | 100 STM1618    |                   | putative tra  | 1706567 |
| 100 | 0 | 100 STM1558    |                   | putative gly  | 1636060 |
| 100 | 1 | 100 STM1803    | dadA              | D-amino ac    | 1902689 |
| 100 | 0 | 65.049 STM1627 |                   | alcohol def   | 1717673 |
| 100 | 0 | 100 STM1639    | cybB              | cytochrom     | 1729823 |
| 100 | 1 | 100 STM1667    |                   | putative thi  | 1759693 |
| 100 | 1 | 100 STM1703    | yciR              | putative PA   | 1796542 |
| 100 | 1 | 100 STM0626    | dpiA              | response r    | 689657  |
| 100 | 1 | 100 STM0985    | lpxK              | tetraacyldis  | 1072180 |

|     |   |        |         |      |              |         |
|-----|---|--------|---------|------|--------------|---------|
| 100 | 1 | 100    | STM0963 | serS | serine tRN   | 1043792 |
| 100 | 1 | 100    | STM3098 |      | putative tra | 3259128 |
| 100 | 1 | 100    | STM0458 |      | putative cy  | 515099  |
| 100 | 0 | 100    | STM3598 |      | putative L-: | 3769992 |
| 100 | 1 | 100    | STM3048 | ygfZ | putative an  | 3206918 |
| 100 | 1 | 100    | STM3684 | yibF | putative glt | 3874183 |
| 100 | 0 | 99     | STM3755 | rhuM | putative cyf | 3951733 |
| 100 | 1 | 100    | STM3178 | ygiY | putative se  | 3341454 |
| 100 | 1 | 100    | STM2684 | recN | protein use  | 2823264 |
| 100 | 0 | 100    | STM3046 | ygfX | putative inr | 3206008 |
| 100 | 0 | 59.804 | STM3122 |      | putative an  | 3280586 |
| 100 | 1 | 100    | STM3585 | yhhJ | putative AE  | 3751834 |
| 100 | 1 | 100    | STM3622 | yhjS | putative cyf | 3804664 |
| 100 | 1 | 100    | STM3747 | yicE | putative NC  | 3941252 |
| 100 | 1 | 100    | STM2672 | yfiN | putative di  | 2813496 |
| 100 | 0 | 100    | STM2702 |      | Fels-2 pro   | 2851384 |
| 100 | 1 | 100    | STM3090 | metK | methionine   | 3251693 |
| 100 | 1 | 100    | STM0444 | ampG | MFS family   | 498600  |
| 100 | 0 | 61.765 | STM3595 |      | putative ph  | 3766164 |
| 100 | 1 | 100    | STM2127 | yegN | paral putati | 2215525 |
| 100 | 1 | 100    | STM2171 | yohF | putative ox  | 2268002 |
| 100 | 1 | 99     | STM3413 | yhdN | putative cyf | 3582401 |
| 100 | 1 | 100    | STM0942 | ybjZ | putative AE  | 1019726 |
| 100 | 1 | 100    | STM4388 | sgaE | putative L-: | 4628953 |
| 100 | 1 | 100    | STM4479 | yjgP | putative pe  | 4722354 |
| 100 | 1 | 100    | STM0931 | ybjR | putative an  | 1005687 |
| 100 | 1 | 100    | STM4367 | yjeB | putative ne  | 4610601 |
| 100 | 1 | 100    | STM3245 | tdcA | transcriptio | 3412473 |
| 100 | 1 | 100    | STM3147 | hybC | hydrogena:   | 3308787 |
| 100 | 1 | 100    | STM2834 | slrB | PTS family   | 2979851 |
| 100 | 1 | 100    | STM2842 | hypF | hydrogena:   | 2987737 |
| 100 | 0 | 64     | STM0354 |      | putative tra | 400860  |
| 100 | 1 | 100    | STM2848 | hycF | hydrogena:   | 2993342 |
| 100 | 1 | 100    | STM2224 | rplY | 50S riboso   | 2326433 |
| 100 | 1 | 99     | STM2110 | wcaF | putative ac  | 2193748 |
| 100 | 1 | 100    | STM2199 | cirA | outer mem    | 2296551 |
| 100 | 1 | 100    | STM1772 | kdsA | 3-deoxy-D-   | 1870407 |
| 100 | 1 | 100    | STM3094 | yggJ | putative cyf | 3256140 |
| 100 | 1 | 100    | STM0718 |      | putative cyf | 782991  |
| 100 | 1 | 100    | STM0798 | uvrB | UvrB with l  | 864433  |
| 100 | 0 | 54.902 | STM0857 |      | putative ac  | 928720  |
| 100 | 1 | 100    | STM3324 | ptsO | NPr, phosp   | 3487659 |
| 100 | 1 | 100    | STM3761 | sisA | putative inr | 3959839 |
| 100 | 1 | 100    | STM0838 | ybiT | putative AT  | 905036  |
| 100 | 1 | 100    | STM3348 | degQ | serine end   | 3515417 |
| 100 | 1 | 100    | STM3260 |      | PTS family   | 3428898 |
| 100 | 1 | 100    | STM3193 |      | putative thi | 3356317 |
| 100 | 1 | 100    | STM2266 | apbE | putative thi | 2364276 |
| 100 | 1 | 100    | STM0744 | ybgC | putative es  | 813027  |
| 100 | 1 | 100    | STM3300 | dacB | D-alanyl-D-  | 3468654 |
| 100 | 1 | 100    | STM3229 | yqjD | putative inr | 3396798 |
| 100 | 1 | 100    | STM3649 | cspA | major cold   | 3836439 |



|        |   |        |          |                    |                     |         |
|--------|---|--------|----------|--------------------|---------------------|---------|
| 100    | 1 | 100    | STM3071  |                    | putative DM         | 3233297 |
| 100    | 0 | 100    | STM0731  |                    | putative intr       | 797197  |
| 100    | 1 | 100    | STM0789  | hutC               | histidine uti       | 854047  |
| 100    | 1 | 100    | STM0741  | cydB               | cytochrome          | 811113  |
| 100    | 1 | 100    | STM3728  | rpmB               | 50S riboso          | 3922226 |
| 100    | 1 | 100    | STM2872  | prgJ               | cell invasio        | 3015751 |
| 100    | 1 | 100    | STM1413  | ssaM               | Secretion s         | 1493303 |
| 100    | 1 | 100    | STM1823  | yoaH               | putative cyf        | 1920909 |
| 100    | 1 | 100    | STM0565  |                    | putative pe         | 621810  |
| 100    | 0 | 100    | STM4158  |                    | putative cyf        | 4376683 |
| 100    | 1 | 100    | STM1389  | orf319             | putative intr       | 1474128 |
| 100    | 1 | 100    | STM3507  | yhgG               | putative cyf        | 3666467 |
| 100    | 1 | 100    | STM4148  | nusG               | component           | 4362402 |
| 100    | 1 | 100    | STM3897  | yifA               | putative tra        | 4105545 |
| 100    | 1 | 100    | STM3980  |                    | putative ou         | 4186117 |
| 100    | 0 | 100    |          | aSTM2712; aSTM2713 |                     |         |
| 100    | 1 | 100    | STM1590  | yncA               | putative ac         | 1678345 |
| 100    | 1 | 100    | STM0102  | araA               | L-arabinos          | 118077  |
| 100    | 0 | 100    | STM1465  | malX               | pseudogen           | 1538863 |
| 100    | 1 | 99     | STM1248  |                    | pseudogen           | 1333542 |
| 100    | 1 | 99     | STM2880  |                    | putative cyf        | 3024108 |
| 100    | 1 | 100    | STM2796  | yqaE               | putative Yq         | 2945700 |
| 100    | 1 | 98.851 | STM0114  | leuL               | leu operon          | 133826  |
| 100    | 0 | 95     | STM2698  |                    | Fels-2 prop         | 2849093 |
| 100    | 0 | 100    | STM0707  |                    | putative ou         | 774035  |
| 100    | 0 | 100    | STM1529  | aSTM1528           | putative intr       | 1605547 |
| 100    | 1 | 100    | STM3797  | ivbL               | ilvB operon         | 3997712 |
| 100    | 1 | 100    | STM3288  | yhbC               | putative cyf        | 3457843 |
| 100    | 1 | 100    | STM3294  | mrsA               | phosphoglu          | 3462407 |
| 100    | 1 | 100    | STM1022  |                    | Gifsy-2 pro         | 1111509 |
| 100    | 0 | 59.615 | STM1023  |                    | Gifsy-2 pro         | 1112373 |
| 100    | 0 | 64     | STM0947  |                    | putative int        | 1026087 |
| 100    | 1 | 99     | STM0743  | ybgE               | putative intr       | 812517  |
| 100    | 0 | 57.426 | PSLT072  |                    | putative tra P60129 |         |
| 100    | 0 | 64.423 | PSLT110  | traX               | conjugative P92560  |         |
| 100    | 0 | 57.282 | PSLT073  | traM               | conjugative P61014  |         |
| 100    | 1 | 99     | PSLT011  | srgA               | sdiA-regula P06671  |         |
| 100    | 0 | 73     | PSLT009  | rcK                | resistance P04992   |         |
| 100    | 0 | 65.385 | PSLT075  | traJ               | conjugative P61587  |         |
| 100    | 0 | 98     | STM1861  |                    | putative cyf        | 1957835 |
| 100    | 0 | 100    | aSTM0007 |                    |                     |         |
| 100    | 0 | 100    | STM1995  | ompS1              | putative po         | 2077569 |
| 100    | 0 | 100    | aSTM2097 |                    |                     |         |
| 100    | 0 | 100    | aSTM2204 |                    |                     |         |
| 100    | 0 | 100    | STM2211  | yeiP               | putative elc        | 2310493 |
| 100    | 0 | 100    | aSTM3152 |                    |                     |         |
| 100    | 0 | 100    | aSTM3216 |                    |                     |         |
| 100    | 0 | 100    | aSTM3241 |                    |                     |         |
| 100    | 0 | 100    | aSTM3348 |                    |                     |         |
| 100    | 0 | 62.617 | STM1046  |                    | Gifsy-2 pro         | 1131381 |
| 100    | 0 |        |          |                    |                     |         |
| 59.406 | 1 | 100    |          |                    |                     |         |

|        |   |     |          |
|--------|---|-----|----------|
| 80     | 1 | 100 |          |
| 61.765 | 1 | 100 |          |
| 89     | 0 | 100 |          |
| 59.813 | 1 | 100 |          |
| 56.436 | 1 | 100 |          |
| 63.462 | 1 | 100 |          |
| 48.544 | 1 | 100 |          |
| 88     | 1 | 100 |          |
| 67.593 | 1 | 100 |          |
| 60.194 | 1 | 100 |          |
| 60.194 | 1 | 100 |          |
| 95     | 1 | 100 |          |
| 93     | 0 | 100 |          |
| 62.5   | 1 | 100 |          |
| 58.333 | 1 | 100 |          |
| 45.545 | 1 | 100 |          |
| 60     | 1 | 100 |          |
| 88     | 0 | 100 |          |
| 74.51  | 1 | 100 |          |
| 100    | 0 | 100 | aSTM2722 |
| 64.078 | 1 | 100 |          |
| 83     | 1 | 100 |          |
| 65.385 | 0 | 100 |          |
| 61     | 1 | 100 |          |
| 67     | 1 | 100 |          |
| 99     | 1 | 100 |          |
| 100    | 1 | 100 |          |
| 61.111 | 1 | 100 |          |
| 75     | 1 | 100 |          |

aSTM4525  
aSTM2729

|     |   |        |         |       |                      |
|-----|---|--------|---------|-------|----------------------|
|     | 0 |        |         |       |                      |
|     | 0 |        |         |       |                      |
|     | 0 |        |         |       |                      |
|     | 0 |        |         |       |                      |
|     | 0 |        |         |       |                      |
|     | 0 |        |         |       |                      |
| 100 | 1 | 100    | STM4291 | basS  | sensory kir 4532639  |
| 100 | 0 | 56.436 | STM3844 |       | pseudogen 4049833    |
| 100 | 1 | 100    | STM3874 | gidA  | associate v 4081898  |
| 100 | 1 | 100    | STM3320 | rpoN  | sigma N (s 3484410   |
| 100 | 1 | 100    | STM3181 | parE  | DNA topois 3343962   |
| 100 | 1 | 100    | STM3304 | rplU  | 50S riboso 3472778   |
| 100 | 1 | 100    | STM0063 | citG2 | putative mc 72929    |
| 100 | 1 | 100    | STM0134 | lpxC  | UDP-3-O-a 156935     |
| 100 | 1 | 100    | STM0167 | yacC  | putative pe 195983   |
| 100 | 1 | 100    | STM0185 | yadB  | putative glu 215433  |
| 100 | 1 | 100    | STM0222 | cdsA  | CDP-diglyc 260126    |
| 100 | 0 | 100    | STM1506 | rspB  | putative de 1583473  |
| 100 | 1 | 100    | STM3369 | yhdP  | paral putati 3535940 |
| 100 | 1 | 100    | STM0631 | ybeM  | putative hy 693656   |
| 100 | 0 | 58.416 | STM0655 | ybeR  | putative cy 718198   |
| 100 | 1 | 100    | STM0687 | ybfM  | putative ou 749534   |
| 100 | 1 | 100    | STM0714 | ybgL  | putative lac 780379  |

|     |   |        |         |         |         |              |         |
|-----|---|--------|---------|---------|---------|--------------|---------|
| 100 | 1 | 100    | STM2398 |         | pgtC    | Phosphogl    | 2510501 |
| 100 | 1 | 100    | STM2101 |         | wcaK    | putative ga  | 2182659 |
| 100 | 0 | 61.386 | STM4575 |         |         | putative ou  | 4830411 |
| 100 | 1 | 100    | STM0282 |         |         | putative ou  | 321111  |
| 100 | 0 | 73     | STM2758 |         |         | putative ph  | 2895879 |
| 100 | 1 | 99     | STM2780 |         |         | homologue    | 2926802 |
| 100 | 0 | 68.317 | STM1044 |         | sodC    | Gifsy-2 pro  | 1130053 |
| 100 | 1 | 100    | STM0272 |         |         | putative AT  | 311194  |
| 100 | 0 | 66     | STM2752 |         |         | putative PT  | 2890110 |
| 100 | 1 | 100    | STM0335 |         |         | putative ou  | 378536  |
| 100 | 1 | 100    | STM1088 |         | pipB    | Pathogenic   | 1176450 |
| 100 | 1 | 100    | STM3412 |         | zntR    | Zn(II)-respr | 3581965 |
| 100 | 1 | 100    | STM3465 |         | yhfA    | putative inr | 3614933 |
| 100 | 1 | 100    | STM1080 |         | yccW    | putative SA  | 1170746 |
| 100 | 1 | 100    | STM1502 |         | speG    | spermidine   | 1580710 |
| 100 | 1 | 100    | STM3455 |         | slyD    | FKBP-type    | 3606315 |
| 100 | 1 | 100    | STM3492 |         | yrfD    | putative pe  | 3645753 |
| 100 | 1 | 100    | STM1238 |         | icdA    | isocitrate d | 1324385 |
| 100 | 1 | 100    | STM1279 |         | yeaM    | putative re  | 1356188 |
| 100 | 1 | 100    | STM3457 |         | kefB    | CPA2 fami    | 3607211 |
| 100 | 1 | 100    | STM1209 |         | ycfO    | putative gly | 1292607 |
| 100 | 1 | 100    | STM1251 |         |         | putative mc  | 1335516 |
| 100 | 0 | 65.094 | STM3559 |         | yhhV    | putative cy  | 3728301 |
| 100 | 1 | 100    | STM4045 |         | rhaD    | rhamnulos    | 4255082 |
| 100 | 0 | 82     | STM4210 |         |         | putative mc  | 4429581 |
| 100 | 1 | 100    | STM4076 |         | ydeZ    | putative AE  | 4286070 |
| 100 | 0 | 62.037 | STM4107 |         | yijF    | putative pe  | 4321821 |
| 100 | 1 | 100    | STM2860 |         | ygbA    | putative cy  | 3005842 |
| 100 | 0 | 100    | STM2918 |         | ygbJ    | 3-hydroxyis  | 3060704 |
| 100 | 1 | 100    | STM2377 |         |         | putative inr | 2487868 |
| 100 | 1 | 100    | STM2410 |         | yfeA    | putative Di  | 2526558 |
| 100 | 0 | 60.194 | STM0900 |         |         | Fels-1 pro   | 969999  |
| 100 | 1 | 100    | STM2485 |         | ypfl    | putative ac  | 2599076 |
| 100 | 1 | 100    | STM0957 |         | cydD    | ABC super    | 1033348 |
| 100 | 0 | 95     | STM2588 | STM0926 | STM1049 | Gifsy-1 pro  | 2734726 |
| 100 | 1 | 100    | STM4082 |         | yiiQ    | putative pe  | 4291145 |
| 100 | 1 | 100    | STM4225 |         | yjbH    | putative ou  | 4443933 |
| 100 | 1 | 100    | STM2913 |         |         | putative pe  | 3055549 |
| 100 | 0 | 86     | STM2938 |         |         | putative cy  | 3078537 |
| 100 | 0 | 100    |         | STM0881 | ybjO    | putative inr | 952597  |
| 100 | 0 | 63.366 | STM0903 |         |         | Fels-1 pro   | 973404  |
| 100 | 0 | 67.647 | STM0920 |         |         | Fels-1 pro   | 992242  |
| 100 | 1 | 100    | STM2525 |         | yfgB    | putative Fe  | 2658697 |
| 100 | 1 | 100    | STM1364 |         | ydiK    | putative pe  | 1445121 |
| 100 | 1 | 100    | STM1937 |         | tyrP    | HAAAP far    | 2030400 |
| 100 | 1 | 100    | STM1994 |         |         | putative inr | 2076620 |
| 100 | 0 | 60.784 | STM4432 |         |         | putative thi | 4675900 |
| 100 | 0 | 63.462 | STM4491 |         |         | putative AT  | 4736677 |
| 100 | 1 | 100    | STM4516 |         | yjiN    | putative inr | 4770684 |
| 100 | 1 | 100    | STM4501 |         |         | putative cy  | 4755577 |
| 100 | 1 | 100    | STM2366 |         | accD    | acetylCoA    | 2478690 |
| 100 | 1 | 100    | STM1228 |         |         | putative pe  | 1314650 |

|     |   |        |         |         |              |         |
|-----|---|--------|---------|---------|--------------|---------|
| 100 | 1 | 100    | STM1336 | rplT    | 50S riboso   | 1415020 |
| 100 | 1 | 100    | STM2433 | crr     | PTS family   | 2546660 |
| 100 | 1 | 100    | STM1278 | yeaN    | putative MF  | 1354903 |
| 100 | 1 | 100    | STM1077 | yccT    | putative pe  | 1169077 |
| 100 | 1 | 100    | STM2866 | sprB    | transcriptio | 3010967 |
| 100 | 1 | 100    | STM2269 | yojN    | putative se  | 2367308 |
| 100 | 1 | 100    | STM1946 | uvrC    | UvrC with l  | 2036418 |
| 100 | 0 | 60.784 | STM2008 |         | putative pe  | 2088672 |
| 100 | 1 | 100    | STM2264 | alkB    | DNA repair   | 2362481 |
| 100 | 1 | 100    | STM1316 | celF    | phospho-bi   | 1394944 |
| 100 | 0 | 52.427 | STM1359 | ydiB    | putative sh  | 1440420 |
| 100 | 0 | 100    | STM1450 | pdxY    | pyridoxal ki | 1524821 |
| 100 | 1 | 100    | STM1481 |         | putative me  | 1558798 |
| 100 | 1 | 100    | STM4232 | malM    | periplasmic  | 4453601 |
| 100 | 1 | 100    | STM3825 | torT    | periplasmic  | 4025332 |
| 100 | 1 | 100    | STM3804 | yidG    | putative inr | 4006384 |
| 100 | 1 | 100    | STM0216 | rpsB    | 30S riboso   | 254297  |
| 100 | 1 | 100    | STM0372 | hemB    | 5-aminolev   | 423678  |
| 100 | 1 | 100    | STM0132 | ftsA    | ATP-bindin   | 154360  |
| 100 | 1 | 100    | STM2327 | nuoB    | NADH deh     | 2438377 |
| 100 | 1 | 100    | STM1721 | trpH    | trpR contro  | 1817408 |
| 100 | 1 | 100    | STM3837 | dnaN    | DNA polym    | 4042519 |
| 100 | 1 | 100    | STM1392 | ssrA    | Secretion s  | 1476836 |
| 100 | 0 | 100    | STM1473 | ompN    | outer mem    | 1549676 |
| 100 | 1 | 100    | STM0545 | fimC    | periplasmic  | 605325  |
| 100 | 1 | 100    | STM3849 | yieE    | putative cy  | 4056350 |
| 100 | 1 | 100    | STM0356 |         | putative inr | 401889  |
| 100 | 1 | 100    | STM2644 | yfiE    | putative tra | 2784255 |
| 100 | 1 | 100    | STM3215 | yqjI    | putative tra | 3380158 |
| 100 | 1 | 100    | STM3524 | glpG    | protein of c | 3687300 |
| 100 | 0 | 100    | STM4155 |         | putative inr | 4374278 |
| 100 | 0 | 65.347 | STM1055 |         | Gifsy-2 pro  | 1142566 |
| 100 | 0 | 61     | STM2631 | STM1010 | Gifsy-1 pro  | 2770520 |
| 100 | 1 | 100    | STM0593 | ybdA    | putative PC  | 653683  |
| 100 | 1 | 100    | STM4381 | yjfQ    | putative tra | 4622946 |
| 100 | 1 | 100    | STM4477 | pepA    | aminopepti   | 4720448 |
| 100 | 1 | 100    | STM2650 | yfiP    | putative cy  | 2789146 |
| 100 | 1 | 100    | STM3202 | ygiF    | putative cy  | 3367001 |
| 100 | 1 | 100    | STM3243 | tdcC    | HAAAP far    | 3410034 |
| 100 | 1 | 100    | STM3249 | garL    | 2-Dehydro-   | 3417369 |
| 100 | 1 | 100    | STM2289 |         | putative 2,  | 2396040 |
| 100 | 1 | 100    | STM2496 | yfgE    | putative AT  | 2609860 |
| 100 | 1 | 100    | STM0486 | recR    | putative rec | 543210  |
| 100 | 1 | 100    | STM0472 | maa     | maltose o-i  | 527401  |
| 100 | 0 | 65.094 | STM0573 |         | putative inr | 633240  |
| 100 | 1 | 100    | STM4007 | glnA    | glutamine s  | 4215599 |
| 100 | 1 | 100    | STM0844 | pflE    | putative py  | 913785  |
| 100 | 1 | 100    | STM0738 | sucC    | succinyl-Cc  | 805911  |
| 100 | 1 | 100    | STM4006 | glnL    | sensory kir  | 4214275 |
| 100 | 1 | 100    | STM2354 | hisJ    | ABC super    | 2464491 |
| 100 | 1 | 100    | STM0118 | fruR    | transcriptio | 138337  |
| 100 | 1 | 100    | STM0694 | fldA    | flavodoxin   | 757128  |

|     |   |        |          |          |              |         |
|-----|---|--------|----------|----------|--------------|---------|
| 100 | 1 | 100    | STM0735  | sdhB     | succinate c  | 800502  |
| 100 | 1 | 100    | STM0228  | lpxA     | UDP-N-acc    | 266995  |
| 100 | 1 | 100    | STM2674  | trmD     | tRNA (guar   | 2815261 |
| 100 | 1 | 100    | STM4361  | hfq      | host factor  | 4604575 |
| 100 | 1 | 100    | STM1777  | hemA     | glutamyl tR  | 1874454 |
| 100 | 1 | 100    | STM2500  | purN     | polyphosph   | 2614110 |
| 100 | 1 | 100    | STM0846  | moeA     | molybdopte   | 915711  |
| 100 | 0 | 51     | STM1240  | envF     | putative en  | 1328189 |
| 100 | 1 | 100    | STM4062  | pfkA     | 6-phosphol   | 4272330 |
| 100 | 1 | 100    | STM0664  | gltJ     | ABC super    | 728009  |
| 100 | 1 | 100    | STM3399  | yrdA     | putative fer | 3572482 |
| 100 | 1 | 100    | STM1600  |          | putative inr | 1690983 |
| 100 | 1 | 98     | STM2634  | aSTM1007 | putative cyf | 2775045 |
| 100 | 1 | 100    | STM2048  | pduM     | Propanedic   | 2124434 |
| 100 | 1 | 100    | STM4286  | lpxO     | putative dic | 4527852 |
| 100 | 1 | 100    | STM1949  | yecF     | putative cyf | 2039367 |
| 100 | 0 | 100    | aSTM4261 |          |              |         |
| 100 | 1 | 100    | STM3357  |          | putative reg | 3525275 |
| 100 | 1 | 100    | STM0010  | htgA     | positive reg | 10092   |
| 100 | 1 | 100    | STM0003  | thrB     | homoserine   | 2801    |
| 100 | 1 | 100    | STM1331  |          | putative inr | 1409558 |
| 100 | 1 | 98     | STM1872  |          | putative cyf | 1968119 |
| 100 | 0 | 100    | STM3264  | yraM     | paral putati | 3433327 |
| 100 | 1 | 100    | STM2475  |          | putative cyf | 2585563 |
| 100 | 0 | 63.462 | STM0913  |          | Fels-1 prop  | 985463  |
| 100 | 1 | 100    | STM2188  | mgIC     | ABC super    | 2283938 |
| 100 | 1 | 100    | STM0570  | apeE     | outer mem    | 627193  |
| 100 | 1 | 100    | STM0191  | fhuA     | outer mem    | 223738  |
| 100 | 0 | 100    | aSTM4261 |          |              |         |
| 100 | 1 | 100    | STM2325  | nuoE     | NADH deh     | 2435985 |
| 100 | 1 | 100    | STM3007  | ygdR     | putative PC  | 3165141 |
| 100 | 1 | 100    | STM3985  | yigZ     | putative cyf | 4193020 |
| 100 | 1 | 100    | STM3960  | rthB     | homoserine   | 4165129 |
| 100 | 1 | 100    | STM3935  | hemY     | a late step  | 4141922 |
| 100 | 1 | 100    | STM4150  | rplA     | 50S riboso   | 4363537 |
| 100 | 1 | 100    | STM3921  | wecC     | UDP-N-acc    | 4130417 |
| 100 | 1 | 100    | STM4137  | murB     | UDP-N-acc    | 4356672 |
| 100 | 1 | 100    | STM1972  | flil     | flagellum-s  | 2059909 |
| 100 | 1 | 100    | STM2431  | ptsH     | PTS family   | 2544586 |
| 100 | 1 | 100    | STM0104  | araC     | transcriptio | 121640  |
| 100 | 1 | 100    | STM2952  | eno      | enolase      | 3097364 |
| 100 | 1 | 100    | STM4084  | fpr      | ferredoxin-  | 4292377 |
| 100 | 1 | 100    | STM2076  | hisA     | N-(5'-phosp  | 2154651 |
| 100 | 1 | 100    | STM3926  | wzxE     | O-antigen t  | 4134795 |
| 100 | 1 | 100    | STM4166  | yjaD     | putative NT  | 4383331 |
| 100 | 1 | 100    | STM0380  | ddlA     | D-alanine-l  | 433543  |
| 100 | 1 | 100    | STM1921  | cheA     | sensory his  | 2017178 |
| 100 | 1 | 100    | STM1796  | treA     | trehalase, p | 1895070 |
| 100 | 0 | 100    | STM1624  |          | putative cyf | 1713259 |
| 100 | 1 | 100    | STM1658  | ydaL     | putative Sn  | 1752842 |
| 100 | 1 | 100    | STM0887  | artJ     | ABC super    | 957935  |
| 100 | 1 | 100    | STM0619  | citG     | putative mc  | 682406  |

|     |   |                       |                   |              |         |
|-----|---|-----------------------|-------------------|--------------|---------|
| 100 | 1 | 100 STM0990           | ycbC              | putative Kic | 1076494 |
| 100 | 1 | 100 STM3766           |                   | putative cy  | 3966637 |
| 100 | 1 | 100 STM0602           | ybdH              | putative gly | 663676  |
| 100 | 1 | 100 STM1719           | yciL              | putative rib | 1815804 |
| 100 | 0 | 100 STM1570           | fdnG              | putative mc  | 1650442 |
| 100 | 1 | 100 STM1821           | yoaA              | putative DM  | 1918518 |
| 100 | 1 | 100 STM1849           |                   | putative inr | 1945858 |
| 100 | 0 | 79 STM1870            |                   | Homology f   | 1966514 |
| 100 | 1 | 100 STM1897           | yebB              | putative pe  | 1992627 |
| 100 | 1 | 100 STM0482           | ybaN              | putative ph  | 539712  |
| 100 | 1 | 100 STM0524           | ybbY              | putative tra | 585378  |
| 100 | 1 | 100 STM0557           |                   | putative inr | 614804  |
| 100 | 1 | 100 STM1575           |                   | putative tra | 1658415 |
| 100 | 0 | 46.078 STM3118        |                   | putative ac  | 3276825 |
| 100 | 0 | 98 STM2288            | aSTM2293          | putative cy  | 2395858 |
| 100 | 1 | 100 STM2774           | iroC              | putative AT  | 2917573 |
| 100 | 1 | 100 STM3655           | glyS              | glycine tRN  | 3839770 |
| 100 | 0 | 100 STM0747           | tolA              | tol protein, | 814617  |
| 100 | 0 | 62.5 aSTM4110 STM4111 |                   | pseudogen    | 4326628 |
| 100 | 1 | 100 STM3175           |                   | putative ba  | 3339316 |
| 100 | 1 | 100 STM3013           | lysA              | diaminopir   | 3172695 |
| 100 | 1 | 100 STM3078           | speB              | agmatinas    | 3239519 |
| 100 | 0 | 65 STM0438            |                   | putative TF  | 491989  |
| 100 | 1 | 100 STM2843           | hydN              | electron tra | 2990123 |
| 100 | 1 | 100 STM3643           | yiaC              | putative ac  | 3829911 |
| 100 | 1 | 100 STM3770           |                   | putative ph  | 3970514 |
| 100 | 1 | 100 STM2998           | ygdB              | putative pe  | 3156404 |
| 100 | 1 | 100 STM3030           |                   | putative pe  | 3192423 |
| 100 | 1 | 100 STM3115           | yqgA              | putative inr | 3275333 |
| 100 | 1 | 100 STM3145           | hybE              | putative hy  | 3307812 |
| 100 | 1 | 100 STM2721           |                   | Fels-2 pro   | 2863059 |
| 100 | 1 | 100 STM2163           | yehX              | putative AE  | 2257962 |
| 100 | 1 | 100 STM1819           | slp               | putative ou  | 1917112 |
| 100 | 1 | 100 STM3428           | rplE              | 50S riboso   | 3590160 |
| 100 | 1 | 100 STM3550           |                   | putative ph  | 3719383 |
| 100 | 1 | 100 STM3296           | hflB              | ATP-deper    | 3464690 |
| 100 | 1 | 100 STM3208           | gcp               | putative O-  | 3372814 |
| 100 | 1 | 100 STM3548           |                   | putative cy  | 3717600 |
| 100 | 1 | 100 STM3310           | yrbC              | putative AE  | 3476946 |
| 100 | 1 | 100 STM4507           | uxuR              | transcriptio | 4761052 |
| 100 | 1 | 100 STM4323           | dsbD              | thiol:disulf | 4567382 |
| 100 | 1 | 100 STM0374           | yaiV              | putative inr | 428187  |
| 100 | 1 | 100 STM2143           | yegU              | putative gly | 2237539 |
| 100 | 1 | 100 STM2836           | gutM              | putative glu | 2981080 |
| 100 | 1 | 100 STM2155           | metG              | methionine   | 2249739 |
| 100 | 1 | 100 STM2221           | bcr               | MFS family   | 2322483 |
| 100 | 0 | 100                   | STM2244; aSTM0926 | homolog of   | 2345014 |
| 100 | 1 | 100 STM2168           | pbpG              | D-alanyl-D-  | 2265525 |
| 100 | 1 | 100 STM0259           | yafE              | putative mc  | 299097  |
| 100 | 1 | 99 STM1407            | ssaH              | Secretion s  | 1489793 |
| 100 | 1 | 100 STM0733           | sdhD              | succinate c  | 798375  |
| 100 | 0 | 100 STM0810           |                   | putative inr | 875587  |

|     |   |        |         |              |               |         |
|-----|---|--------|---------|--------------|---------------|---------|
| 100 | 1 | 100    | STM2678 | corE         | putative cy   | 2818729 |
| 100 | 0 | 100    |         | STM3271 yhbQ | putative cy   | 3438731 |
| 100 | 1 | 100    | STM3227 | yqjB         | putative ou   | 3395860 |
| 100 | 1 | 100    | STM0851 | yliD         | putative AE   | 922527  |
| 100 | 1 | 100    | STM1385 | ttrB         | Tetrathion    | 1470433 |
| 100 | 1 | 100    | STM3233 | yqjG         | putative glt  | 3398498 |
| 100 | 1 | 100    | STM3155 |              | putative cy   | 3317655 |
| 100 | 0 | 100    | STM3045 | fldB         | flavodoxin    | 3205434 |
| 100 | 1 | 100    | STM0760 | aroG         | 3-deoxy-D-    | 823772  |
| 100 | 1 | 100    | STM1183 | flgK         | flagellar bic | 1265468 |
| 100 | 1 | 100    | STM1915 | cheZ         | chemotacti    | 2011628 |
| 100 | 1 | 100    | STM3129 |              | putative N/   | 3288972 |
| 100 | 1 | 100    | STM1113 | scsA         | Suppressic    | 1200154 |
| 100 | 1 | 100    | STM0749 | pal          | tol protein   | 817291  |
| 100 | 1 | 100    | STM0796 | bioC         | biotin biosy  | 862348  |
| 100 | 1 | 100    | STM0599 | ybdB         | putative pro  | 660679  |
| 100 | 1 | 100    | STM2537 | yfhJ         | believed to   | 2677648 |
| 100 | 1 | 100    | STM2481 | acrD         | RND family    | 2593647 |
| 100 | 1 | 100    | STM2826 | csrA         | carbon stoi   | 2970951 |
| 100 | 0 | 64.423 | STM1037 |              | Gifsy-2 pro   | 1123997 |
| 100 | 0 | 63.208 | STM4219 |              | putative cy   | 4438132 |
| 100 | 1 | 100    | STM3741 | rpoZ         | RNA polym     | 3933776 |
| 100 | 1 | 100    | STM3686 | mtlD         | mannitol-1-   | 3877404 |
| 100 | 1 | 100    | STM4252 |              | putative inr  | 4472301 |
| 100 | 0 | 75     | STM4209 |              | putative inr  | 4429372 |
| 100 | 1 | 99     | STM2139 |              | putative inr  | 2233116 |
| 100 | 0 | 93     | STM2733 |              | Fels-2 prop   | 2874070 |
| 100 | 1 | 100    | STM3621 | yhjR         | putative cy   | 3804216 |
| 100 | 1 | 100    | STM0273 |              | putative cy   | 313933  |
| 100 | 0 | 67     | STM1350 | ydiD         | homologue     | 1430189 |
| 100 | 1 | 100    | STM0563 |              | putative tra  | 619258  |
| 100 | 0 | 62.963 | STM1362 | ydiL         | putative cy   | 1444304 |
| 100 | 1 | 100    | STM1563 | osmC         | putative res  | 1644237 |
| 100 | 1 | 100    | STM0044 | yaaY         | putative cy   | 52649   |
| 100 | 0 | 63.107 | STM3829 | dgoK         | 2-oxo-3-de    | 4032380 |
| 100 | 1 | 100    | STM3820 |              | putative cy   | 4018596 |
| 100 | 0 | 100    | STM0099 |              | putative inr  | 116299  |
| 100 | 0 | 96.667 | STM1794 |              | putative pe   | 1893098 |
| 100 | 1 | 100    | STM2542 | nifU         | NifU homol    | 2681123 |
| 100 | 1 | 100    | STM3266 | yraO         | putative ph   | 3435744 |
| 100 | 0 | 62.136 | STM2607 |              | Gifsy-1 pro   | 2755399 |
| 100 | 1 | 100    | STM0875 | rimK         | ribosomal p   | 946561  |
| 100 | 1 | 100    | STM0943 | cspD         | similar to C  | 1021802 |
| 100 | 1 | 100    | STM1006 |              | Gifsy-2 pro   | 1099565 |
| 100 | 1 | 100    | STM0805 | moaD         | molybdopte    | 872636  |
| 100 | 0 | 60.87  | PSLT085 | traR         | conjugative   | P67516  |
| 100 | 0 | 63     | PSLT021 | aPSLT022     | pseudogen     | P15921  |
| 100 | 0 | 66.019 | PSLT094 | trbC         | conjugative   | P73532  |
| 100 | 0 | 60     | PSLT078 | traL         | conjugative   | P63013  |
| 100 | 0 | 67.327 | PSLT016 | pefD         | plasmid-en    | P10248  |
| 100 | 0 | 56.436 | PSLT015 | orf5         | putative ou   | P09676  |
| 100 | 0 | 63.366 | PSLT066 | ssbB         | single-strar  | P54401  |





im in the respective genome  
 presented by an alternative spot  
 tter represented by an alternative spot  
 better represented by an alternative spot

| GENE_EN | LT2_GENE     | STRAND | BEST_HIT_%ID | 2ND_BEST%ID | BEST_HIT_%ID |        |
|---------|--------------|--------|--------------|-------------|--------------|--------|
| 2056322 | atggcagca    | -      | STM1968      | 100         | STM1968      | 100    |
| 3335879 | atgcattcag   | -      | STM3172      | 100         | STM3172      | 100    |
| 2102700 | atgaccgggc   | -      | STM2021      | 100         | STM0713      | 61.765 |
| 100640  | atggatagcc   | +      | STM0086      | 100         | STM0492      | 89     |
| 165096  | atgcgtattga  | +      | STM0141      | 100         | STM2511      | 64     |
| 151024  | atgagtggtc   | +      | STM0128      | 100         | STM2252      | 60     |
| 191153  | atgaacatca   | +      | STM0161      | 100         | STM0651      | 77     |
| 213877  | atgacgatcg   | -      | STM0183      | 100         | STM0281      | 61.682 |
| 253846  | atggctatctc  | -      | STM0215      | 100         | STM2323      | 60     |
| 288054  | atgattaaact  | -      | STM0247      | 100         | STM0828      | 73     |
| 1608915 | gtgcaaagat   | -      | STM1532      | 100         | STM3744      | 63.366 |
| 747210  | atgaatatttta | +      | STM0685      | 100         | STM1203      | 74     |
| 778791  | atgaaaaac    | +      | STM0711      | 100         | STM0711      | 100    |
| 4702396 | atgctaaaaa   | +      | STM4456      | 100         | STM3763      | 78     |
| 2110823 | atgagcgagc   | -      | STM2032      | 100         | STM4275      | 63.303 |
| 2081582 | atggaattttc  | -      | STM1998      | 100         | PSLT055      | 66     |
| 1098033 | atgacacaat   | -      | STM1004      | 100         | STM1115      | 62.264 |
| 4048071 | atggattcgc   | +      | STM3842      | 100         | STM3373      | 62.376 |
| 4077975 | atgcaactga   | -      | STM3867      | 100         | STM3867      | 100    |
| 60148   | atgggcaaa    | +      | STM0050      | 100         | STM0050      | 98.28  |
| 116097  | atgaaatattc  | -      | STM0098      | 100         | STM0098      | 100    |
| 3504358 | atgcagaac    | +      | STM3334      | 100         | STM0525      | 74.286 |
| 3541316 | atgacggctg   | -      | STM3370      | 100         | STM1185      | 76     |
| 1185708 | atgcaagtag   | -      | STM1098      | 100         | STM3796A     | 61.386 |
| 1220620 | atggggatgc   | +      | STM1130      | 100         | STM0557      | 58.333 |
| 1253774 | atgaaatattg  | +      | STM1168      | 100         | STM4127      | 65.347 |
| 3669379 | atgctaacag   | +      | STM3510      | 100         | STM0760      | 74     |
| 3697935 | atgactcaga   | +      | STM3532      | 100         | STM1469      | 62.264 |
| 3740221 | atggcaaaa    | -      | STM3571      | 100         | STM2677      | 64     |
| 1273989 | atgctcatt    | +      | STM1188      | 100         | STM3647      | 59     |
| 3679605 | atgttgattcc  | +      | STM3515      | 100         | STM1057      | 62.136 |
| 3701359 | atgaatgctc   | -      | STM3534      | 100         | STM3514      | 76     |
| 3741202 | atgatgtgatt  | +      | STM3573      | 100         | STM3006      | 67     |
| 4823656 | gtgtttctcgc  | +      | STM4568      | 100         | STM4568      | 100    |
| 2866841 | atgagtgaac   | +      | STM2723      | 100         | STM0977      | 63.107 |
| 3726297 | atgcatcatc   | -      | STM3556      | 100         | STM3555      | 63     |
| 4806842 | atgctgccag   | +      | STM4547      | 100         | STM3011      | 62.376 |
| 4844922 | atgcagcaac   | +      | STM4588      | 100         | STM2131      | 72     |
| 2876811 | atgagtttaatt | +      | STM2738      | 100         | STM3280      | 57.143 |
| 2894320 | atgaaattac   | -      | STM2755      | 100         | STM4386      | 66.667 |

|         |                |         |     |         |        |         |       |
|---------|----------------|---------|-----|---------|--------|---------|-------|
| 2923547 | atgtatggtcg +  | STM2776 | 100 | STM1063 | 82     | STM2776 | 100   |
| 4316641 | atgccgcctci -  | STM4103 | 100 | STM3296 | 63.366 | STM4103 | 100   |
| 3003483 | atgcaacagt +   | STM2858 | 100 | STM2829 | 60.396 | STM2858 | 100   |
| 3069239 | atgcgcatatt -  | STM2927 | 100 | STM1033 | 62.5   | STM2927 | 100   |
| 954243  | atgcagtgcg +   | STM0882 | 100 | STM2957 | 63.551 | STM0882 | 100   |
| 974766  | atgccaggat -   | STM0904 | 100 | STM0750 | 58.333 | STM0904 | 100   |
| 2604921 | atgttcacggc -  | STM2489 | 100 | STM3265 | 63.889 | STM2489 | 100   |
| 968606  | atgtttgtgaa -  | STM0898 | 100 | STM0731 | 61.165 | STM0898 | 100   |
|         |                | STM2479 | 100 | STM3331 | 82     | STM2479 | 100   |
| 1030876 | atgttttcggc -  | STM0954 | 100 | STM0953 | 73     | STM0954 | 100   |
| 1070398 | atgaagataa +   | STM0983 | 100 | STM0261 | 60     | STM0983 | 100   |
| 1120742 | atggaagag +    | STM1032 | 100 | STM0911 | 87     | STM1032 | 100   |
| 4288122 | atggcaaga +    | STM4077 | 100 | STM1692 | 63.107 | STM4077 | 100   |
| 4337904 | atgaacgaa -    | STM4119 | 100 | STM3042 | 62.136 | STM4119 | 100   |
| 4559077 | atgctgttacg +  | STM4310 | 100 | PSLT007 | 65     | STM4310 | 100   |
| 949497  | atgaccgcct +   | STM0877 | 100 | STM1222 | 65.686 | STM0877 | 99.73 |
| 981676  | atgacgggg +    | STM0910 | 100 | STM1031 | 86     | STM0910 | 100   |
| 2657374 | atgcataacc -   | STM2523 | 100 | STM0738 | 62     | STM2523 | 100   |
| 2690948 | atgaagcca -    | STM2552 | 100 | STM2342 | 94     | STM2552 | 95.52 |
| 1043533 | gtgagcaatc +   | STM0962 | 100 | STM3604 | 62.376 | STM0962 | 100   |
| 2721652 | atgaatatca +   | STM2575 | 100 | STM3753 | 66     | STM2575 | 100   |
| 2075759 | atgcaggaa -    | STM1992 | 100 | STM2481 | 71     | STM1992 | 100   |
| 2370644 | atgaacaata +   | STM2270 | 100 | STM2146 | 62.727 | STM2270 | 100   |
| 4768620 | tgtctttttacc - | STM4514 | 100 | STM3282 | 54.369 | STM4514 | 100   |
| 1196318 | atgtgccaac +   | STM1108 | 100 | STM2493 | 86     | STM1108 | 100   |
| 2458962 | atggtggaac -   | STM2346 | 100 | STM0685 | 54.369 | STM2346 | 100   |
| 2045466 | atgaattcact -  | STM1956 | 100 | STM2248 | 72     | STM1956 | 100   |
| 231217  | atgaatacag +   | STM0195 | 100 | STM0964 | 91     | STM0195 | 100   |
| 1252270 | atgtcgcgcg -   | STM1166 | 100 | STM0426 | 59.223 | STM1166 | 100   |
| 1451888 | atggtgttac -   | STM1368 | 100 | STM1320 | 72     | STM1368 | 100   |
| 4619529 | atgctacgac +   | STM4376 | 100 | STM3188 | 71     | STM4376 | 100   |
| 3008103 | atgagtcaat +   | STM2862 | 100 | STM2351 | 72.277 | STM2862 | 100   |
| 1526345 | atgaaactgt -   | STM1451 | 100 | STM3827 | 61.386 | STM1451 | 100   |
| 2071865 | atgcaaaatt -   | STM1988 | 100 |         |        | STM1988 | 100   |
| 2147191 | atgaccatgt -   | STM2068 | 100 | STM1379 | 64     | STM2068 | 100   |
|         |                | STM2293 | 100 | STM2288 | 96     | STM2293 | 100   |
| 2439498 | atgagtatgtc -  | STM2328 | 100 |         |        | STM2328 | 100   |
| 4684280 | gtgagacgc +    | STM4440 | 100 | STM1690 | 60.784 | STM4440 | 100   |
| 4731601 | atggcgcttac +  | STM4488 | 100 | STM3844 | 56     | STM4488 | 100   |
| 4760702 | atgataaaaag -  | STM4506 | 100 | STM2466 | 55.769 | STM4506 | 100   |
| 2483491 | gtgaaaattct -  | STM2370 | 100 | STM3062 | 66     | STM2370 | 90.89 |
| 1342533 | atgctctataa +  | STM1257 | 100 | STM0463 | 66.337 | STM1257 | 100   |
| 1557224 | atgcgaattg +   | STM1479 | 100 | STM2816 | 68     | STM1479 | 100   |
| 362430  | gtgtctgaact -  | STM0316 | 100 | STM1752 | 59.406 | STM0316 | 100   |
| 194171  | atgaaaggaa +   | STM0164 | 100 | STM2837 | 61.765 | STM0164 | 100   |
| 250113  | atgcagcagt -   | STM0213 | 100 | STM1971 | 63.303 | STM0213 | 100   |
| 153531  | atggctgata +   | STM0130 | 100 |         |        | STM0130 | 100   |
| 1383420 | atgtctctgtc +  | STM1303 | 100 | STM3468 | 82     | STM1303 | 100   |
| 1419064 | atgaaattca +   | STM1338 | 100 | STM3280 | 62.617 | STM1338 | 100   |
| 1435273 | atgaaaataa -   | STM1354 | 100 | STM0075 | 73.267 | STM1354 | 100   |
| 2241061 | atgcaacgaa -   | STM2146 | 100 | STM1723 | 64.815 | STM2146 | 100   |
| 1547706 | atgaaaaagi -   | STM1471 | 100 | STM3178 | 64.706 | STM1471 | 100   |

|                        |         |     |         |                |      |
|------------------------|---------|-----|---------|----------------|------|
| 1498676 atgtaagaal +   | STM1418 | 100 |         | STM1418        | 100  |
| 4073441 atgctattcaç -  | STM3863 | 100 | STM3660 | 58.824 STM3863 | 100  |
| 321114 atgagctgga +    | STM0281 | 100 | STM0183 | 61.765 STM0281 | 100  |
| 257705 gtgattagcg; +   | STM0219 | 100 | STM1770 | 58.416 STM0219 | 100  |
| 2068050 atgtcaacga +   | STM1982 | 100 | STM1409 | 60.377 STM1982 | 100  |
| 2517243 atggctgactt -  | STM2402 | 100 | STM2073 | 70 STM2402     | 100  |
| 2427347 atgttattaccr - | STM2317 | 100 | STM2318 | 69 STM2317     | 100  |
| 1430148 atgtccaaca +   | STM1349 | 100 | STM4343 | 63.725 STM1349 | 100  |
| 3015754 atgattcgctg -  | STM2871 | 100 | STM1409 | 56.075 STM2871 | 100  |
| 2555425 atgctgcccgt -  | STM2443 | 100 | STM2442 | 66.337 STM2443 | 100  |
| 563929 atgaacgagr +    | STM0503 | 100 | STM0852 | 57.843 STM0503 | 100  |
| 4210982 atgaaaaaa +    | STM4003 | 100 | STM3645 | 64 STM4003     | 100  |
| 4593546 ttgttaaactç -  | STM4348 | 100 | STM4524 | 64.706 STM4348 | 100  |
| 2758033 atgaacgtga -   | STM2609 | 100 | STM4489 | 60.194 STM2609 | 100  |
| 3347737 atgaagcgtt; -  | STM3184 | 100 | STM1467 | 75 STM3184     | 100  |
| 3725413 atgatagaga -   | STM3555 | 100 | STM3556 | 88 STM3555     | 100  |
| 3460266 ttgcataaaa; +  | STM3290 | 100 | STM1885 | 66.667 STM3290 | 100  |
| 2461060 atgattgacct +  | STM2349 | 100 | STM3140 | 63.725 STM2349 | 100  |
| 573647 gtggatgattt; +  | STM0512 | 100 | STM0246 | 66.667 STM0512 | 100  |
| 4633712 atgcccgggç -   | STM4396 | 100 | STM0960 | 59 STM4396     | 100  |
| 4725729 atgaggaatç -   | STM4481 | 100 | STM1527 | 66.038 STM4481 | 100  |
| 2944410 atggggcaat +   | STM2793 | 100 | STM1584 | 71.569 STM2793 | 100  |
| 4765974 atggatgtaa; -  | STM4511 | 100 | STM0764 | 61.765 STM4511 | 100  |
| 4852778 atgaaacacç -   | STM4594 | 100 | STM0176 | 75 STM4594     | 100  |
| 3843201 atgataatga; -  | STM3657 | 100 |         | STM3657        | 100  |
| 3422271 gtggcaaaa; -   | STM3252 | 100 |         | STM3252        | 100  |
| 3444726 atgagtgaac +   | STM3278 | 100 |         | STM3278        | 100  |
| 4321763 atgagcacgç; +  | STM4106 | 100 | STM0638 | 56.863 STM4106 | 100  |
| 1922533 atgatgaaga +   | STM1824 | 100 |         | STM1824        | 100  |
| 610210 atgatccttcg +   | STM0548 | 100 | STM0291 | 58.416 STM0548 | 100  |
| 4238214 atgctaaaaa +   | STM4027 | 100 | STM1796 | 61.165 STM4027 | 100  |
| 693565 gtgttacagct -   | STM0630 | 100 | STM4188 | 59 STM0630     | 100  |
| 3578408 gtgtcagattc +  | STM3407 | 100 | STM4513 | 58.654 STM3407 | 100  |
| 1331439 atgaaacatç -   | STM1244 | 100 | STM0357 | 92 STM1244     | 100  |
| 4346214 gtgatgggtgl +  | STM4127 | 100 | STM1168 | 63.889 STM4127 | 100  |
| 753865 atgaaacagr; -   | STM0690 | 100 | STM3711 | 58.879 STM0690 | 100  |
| 798381 atgataagaa +    | STM0732 | 100 | STM0530 | 61.538 STM0732 | 96.3 |
| 1062563 atggctcagg +   | STM0977 | 100 | STM2723 | 63.725 STM0977 | 100  |
| 641512 atgctgacatç -   | STM0584 | 100 | STM0985 | 59.406 STM0584 | 100  |
| 3626381 atgagtcagtt; + | STM3475 | 100 | STM0282 | 60.194 STM3475 | 100  |
| 4380491 atgtatcagcç -  | STM4163 | 100 | STM2540 | 64.078 STM4163 | 100  |
| 3733502 atgaaacggç; -  | STM3564 | 100 | STM3567 | 88 STM3564     | 100  |
| 2926408 ggtatagcac +   | STM2778 | 100 | STM2779 | 100 STM2778    | 100  |
| 1713210 atgttgaatcc -  | STM1623 | 100 |         | STM1623        | 100  |
| 1257339 atgagcattgç; - | STM1172 | 100 | STM3009 | 65.385 STM1172 | 100  |
| 3547985 atgcaggcgt +   | STM3376 | 100 | STM1827 | 61.682 STM3376 | 100  |
| 38674 atggtttatatç -   | STM0033 | 100 | STM4104 | 77 STM0033     | 100  |
| 95465 atgctcccgg +     | STM0083 | 100 | STM3953 | 60 STM0083     | 100  |
| 1335364 ttgttctggtg +  | STM1250 | 100 | STM4261 | 55 STM1250     | 100  |
| 4232847 atgaaatggtl; - | STM4021 | 100 |         | STM4021        | 100  |
| 3521821 atgaccattgç; - | STM0055 | 100 | STM0767 | 100 STM3352    | 100  |
| 28424 atgcgtaatç; +    | STM0023 | 100 | STM4593 | 78 STM0023     | 100  |

|                       |         |             |                |       |
|-----------------------|---------|-------------|----------------|-------|
| 2122685 atgcgatata+   | STM2043 | 100 STM0326 | 85 STM2043     | 100   |
| 4547011 atgtcgaaaa-   | STM4300 | 100 STM1468 | 92 STM4300     | 100   |
| 2025499 gtggcagaa-    | STM1929 | 100 STM2994 | 75.728 STM1929 | 89.04 |
| 2618549 atgccaattta+  | STM2502 | 100 STM3913 | 68.317 STM2502 | 100   |
| 4501818 atggctgcca-   | STM4263 | 100 STM2175 | 63.303 STM4263 | 100   |
| 2813503 atgcgttttct+  | STM2671 | 100 STM2450 | 49.505 STM2671 | 100   |
| 72951 atgaagggc+      | STM0062 | 100 STM0620 | 66 STM0062     | 100   |
| 4000873 atgaaaagga+   | STM3798 | 100 STM3799 | 74 STM3798     | 100   |
| 4178046 atgggtggaag+  | STM3970 | 100 STM3348 | 73 STM3970     | 100   |
| 4160028 atgcctcccc-   | STM3954 | 100 STM2874 | 52.475 STM3954 | 100   |
| 2167299 atgatcgtaa-   | STM2086 | 100 STM0284 | 62.5 STM2086   | 100   |
| 2505748 atggatagcc+   | STM2393 | 100 STM4271 | 64.706 STM2393 | 99.89 |
| 1913900 atggcattact+  | STM1816 | 100 STM4199 | 61.111 STM1816 | 100   |
| 1831200 atgacaaca-    | STM1736 | 100 STM3567 | 58.491 STM1736 | 100   |
| 3135189 atgtcaaac-    | STM2982 | 100 STM0888 | 63.107 STM2982 | 100   |
| 3057992 atgcagattat-  | STM2914 | 100 STM0122 | 65.714 STM2914 | 100   |
| 4306683 atgaaaaatc-   | STM4097 | 100         | STM4097        | 100   |
| 637681 atggatattct-   | STM0578 | 100         | STM0578        | 100   |
| 4300481 atgtctgaaat-  | STM4091 | 100 STM3571 | 68 STM4091     | 100   |
| 2130091 atgagcacc+    | STM2053 | 100 STM1457 | 63 STM2053     | 99.93 |
| 4162492 atgcggggcg+   | STM3957 | 100 STM0145 | 50.485 STM3957 | 100   |
| 4138476 atgagtttaat+  | STM3928 | 100 STM3851 | 65.049 STM3928 | 100   |
| 1346487 gtgattcattta+ | STM1263 | 100 STM1033 | 55.446 STM1263 | 100   |
| 3188470 atgaaaaac-    | STM3027 | 100 PSLT016 | 69.159 STM3027 | 100   |
| 3115525 atggcggaa-    | STM2963 | 100 STM2051 | 62.136 STM2963 | 100   |
| 484068 atgaaatctat-   | STM0430 | 100 STM2853 | 60.377 STM0430 | 100   |
| 4181310 gtgtttgatatc+ | STM3974 | 100 STM0309 | 64.356 STM3974 | 100   |
| 577382 atgacggaa+     | STM0516 | 100 STM4187 | 65.686 STM0516 | 96.13 |
| 635170 atgagtgaag-    | STM0574 | 100 STM3769 | 72 STM0574     | 100   |
| 621653 atgacacagt+    | STM0564 | 100 STM3596 | 63.725 STM0564 | 100   |
| 663379 atgaataaat+    | STM0600 | 100 STM4532 | 89 STM0600     | 100   |
| 1704518 atgtttgattac+ | STM1614 | 100 STM3260 | 70.192 STM1614 | 100   |
| 1634732 atgagtgcatt+  | STM1556 | 100 STM2023 | 60 STM1556     | 100   |
| 1689818 atgaaaaaal-   | STM1598 | 100 STM2803 | 68 STM1598     | 100   |
| 1724652 atgttatccaa+  | STM1633 | 100 STM1954 | 55.66 STM1633  | 100   |
| 1726062 atggctttact+  | STM1635 | 100 STM1951 | 72 STM1635     | 100   |
| 1990064 atgatagaag-   | STM1894 | 100         | STM1894        | 100   |
| 552026 atgcatcacg-    | STM0492 | 100 STM0086 | 89 STM0492     | 100   |
| 691776 atgctaacag-    | STM0627 | 100 STM4052 | 83 STM0627     | 100   |
| 3970517 atgatgagca-   | STM3769 | 100 STM0574 | 72 STM3769     | 100   |
| 666051 atgagaaata+    | STM0603 | 100 STM1307 | 63.366 STM0603 | 100   |
| 659050 atgcgtatac+    | STM0596 | 100 STM1350 | 67.327 STM0596 | 100   |
| 2877840 atgagcatca+   | STM2739 | 100 STM0981 | 87 STM2739     | 100   |
| 1846620 atggcacagc-   | STM1750 | 100 STM2975 | 59.434 STM1750 | 100   |
| 1686217 atgacaaaar+   | STM1595 | 100 STM3247 | 63.107 STM1595 | 100   |
| 1735236 atgactgaac-   | STM1641 | 100 STM0189 | 73 STM1641     | 100   |
| 1761179 gtgcgtatgtc-  | STM1668 | 100 STM2087 | 72.277 STM1668 | 100   |
| 4630443 gtgtggcaaaa+  | STM4390 | 100         | STM4390        | 100   |
| 2804689 atgcgtctgg-   | STM2660 | 100 STM0272 | 73.267 STM2660 | 100   |
| 3185043 atgggtgaat+   | STM3024 | 100 STM2063 | 74 STM3024     | 100   |
| 435428 atgtttatggg+   | STM0381 | 100 STM0239 | 61.905 STM0381 | 100   |
| 3278702 atgaacacgt-   | STM3119 | 100 STM0255 | 61.905 STM3119 | 100   |

|                        |         |     |         |        |         |       |
|------------------------|---------|-----|---------|--------|---------|-------|
| 516725 atgttagataa +   | STM0459 | 100 | STM0046 | 61.386 | STM0459 | 100   |
| 3258665 atgaatttaca +  | STM3096 | 100 |         |        | STM3096 | 100   |
| 3887567 atgaacctctc +  | STM3692 | 100 |         |        | STM3692 | 100   |
| 4009188 atgagtgatai -  | STM3807 | 100 | STM1555 | 63.107 | STM3807 | 100   |
| 3146111 atgacaatcc -   | STM2993 | 100 | STM2868 | 62.385 | STM2993 | 100   |
| 3191000 atgaaaattar -  | STM3028 | 100 | STM0196 | 66     | STM3028 | 100   |
| 458675 atggctactggt -  | STM0402 | 100 | STM0608 | 70     | STM0402 | 100   |
| 3787351 atgataaagc -   | STM3611 | 100 | STM2106 | 55.66  | STM3611 | 100   |
| 3838221 gtgggacgtg -   | STM3651 | 100 | STM1257 | 62.5   | STM3651 | 100   |
| 3872696 atgattattgc -  | STM3682 | 100 |         |        | STM3682 | 100   |
| 3923345 atggatacgtt -  | STM3729 | 100 | STM2745 | 63.81  | STM3729 | 100   |
| 3971894 atggccaata -   | STM3771 | 100 | STM1830 | 63.366 | STM3771 | 100   |
| 770278 atgacggttt -    | STM0704 | 100 | STM2556 | 60.377 | STM0704 | 100   |
| 4818753 gtgagctggc +   | STM4564 | 100 | STM1202 | 65.385 | STM4564 | 100   |
| 2961651 atggatagttc +  | STM2813 | 100 | STM0524 | 89     | STM2813 | 100   |
| 2224540 atgaaagtctc +  | STM2130 | 100 | STM0703 | 70     | STM2130 | 100   |
| 2318024 atgattgccc +   | STM2216 | 100 | STM3647 | 62.264 | STM2216 | 100   |
| 2182662 atgaaagtca -   | STM2100 | 100 |         |        | STM2100 | 100   |
| 2260992 atgacgatctc -  | STM2165 | 100 | STM0650 | 61.538 | STM2165 | 100   |
| 2295152 atgagcattat +  | STM2197 | 100 | STM4578 | 82     | STM2197 | 100   |
| 2331464 atgaagcagc -   | STM2230 | 100 | STM2753 | 59     | STM2230 | 100   |
| 2274333 atgaccaaat -   | STM2177 | 100 | STM1101 | 68     | STM2177 | 100   |
| 1009056 gtggcgcaac -   | STM0933 | 100 | STM3010 | 64     | STM0933 | 100   |
| 3829933 atgcagcgttc +  | STM3642 | 100 |         |        | STM3642 | 100   |
| 3717584 atgaaatttga +  | STM3547 | 100 | STM1382 | 69.307 | STM3547 | 100   |
| 3857113 atgatttttga +  | STM3669 | 100 | STM3637 | 65     | STM3669 | 100   |
| 3748219 atgccaattt +   | STM3580 | 100 | STM2909 | 65     | STM3580 | 100   |
| 3509012 atggcaaaa -    | STM3339 | 100 | STM1345 | 61.538 | STM3339 | 100   |
| 3403325 atgtttgaatct - | STM3238 | 100 | STM4272 | 60.784 | STM3238 | 100   |
| 3306074 atgcgaatac -   | STM3141 | 100 | STM1772 | 65.094 | STM3141 | 100   |
| 2998981 gtgaatcgtttt - | STM2852 | 100 | STM2843 | 71     | STM2852 | 100   |
| 3369158 atgcaaaaat +   | STM3203 | 100 | STM2660 | 72.816 | STM3203 | 100   |
| 1487054 atggaagcgc +   | STM1401 | 100 | STM0763 | 62.745 | STM1401 | 100   |
| 1203071 atgaaataca +   | STM1115 | 100 | STM1004 | 62.5   | STM1115 | 100   |
| 829818 ttgttggttttag + | STM0765 | 100 | STM3356 | 61.765 | STM0765 | 100   |
| 902744 atgggtcgtcc +   | STM0835 | 100 | STM3274 | 48     | STM0835 | 100   |
| 1473722 atggcgacaac +  | STM1387 | 100 | STM4174 | 88     | STM1387 | 100   |
| 837115 atggctgtaac -   | STM0772 | 100 | STM0272 | 75     | STM0772 | 100   |
| 881965 atgagtaagtr -   | STM0816 | 100 | STM3586 | 65.347 | STM0816 | 100   |
| 934630 atggctaaag +    | STM0861 | 100 | STM1380 | 52.427 | STM0861 | 100   |
| 3482535 atgagtaaag +   | STM3316 | 100 | STM0175 | 68.807 | STM3316 | 100   |
| 2061744 atggcacaac +   | STM1973 | 100 | STM2206 | 62.037 | STM1973 | 100   |
| 3305296 atggcagata +   | STM3140 | 100 | STM2349 | 63.366 | STM3140 | 100   |
| 875579 ttggtgatgat +   | STM0809 | 100 | STM4076 | 60.577 | STM0809 | 100   |
| 928426 atggctcttta +   | STM0856 | 100 | STM1353 | 69     | STM0856 | 100   |
| 4665445 atggaacaac -   | STM4421 | 100 | STM2791 | 62.385 | STM4421 | 100   |
| 4684653 atggaacagc +   | STM4441 | 100 |         |        | STM4441 | 100   |
| 489704 atgacgccaac -   | STM0436 | 100 |         |        | STM0436 | 98.47 |
| 4665763 atgaaacaac -   | STM4422 | 100 | STM1785 | 57.692 | STM4422 | 100   |
| 663640 atgttcgatac +   | STM0601 | 100 | STM4531 | 77     | STM0601 | 100   |
| 582659 atgcgtgaaa +    | STM0521 | 100 | STM0522 | 94     | STM0521 | 100   |
| 614417 atgagcggta -    | STM0556 | 100 |         |        | STM0556 | 100   |

|         |                |         |        |         |        |         |       |
|---------|----------------|---------|--------|---------|--------|---------|-------|
| 639357  | atgaccatttc +  | STM0581 | 100    | STM1519 | 66.337 | STM0581 | 100   |
| 639611  | atgaaacac -    | STM0582 | 100    | STM0431 | 60.577 | STM0582 | 100   |
| 1887736 | atgagtaacc +   | STM1787 | 100    | STM1538 | 80     | STM1787 | 100   |
| 377845  | atgacgttaa -   | STM0334 | 100    | STM0333 | 74     | STM0334 | 100   |
| 2621717 | atgtacttaga -  | STM2507 | 100    | STM0981 | 56     | STM2507 | 100   |
| 2385182 | atgggacgc +    | STM2279 | 100    | STM0936 | 58     | STM2279 | 100   |
| 3314239 | atgaataatc -   | STM3151 | 100    | STM1631 | 57.282 | STM3151 | 100   |
| 956219  | atgaaagatt +   | STM0885 | 100    | STM4130 | 50.495 | STM0885 | 100   |
| 677800  | atgtataaga -   | STM0614 | 100    | STM0935 | 73     | STM0614 | 100   |
| 3979460 | atgtcagcaa +   | STM3778 | 100    | STM0513 | 62.264 | STM3778 | 100   |
| 3903907 | atgaaagcgt -   | STM3708 | 100    | STM1082 | 64.356 | STM3708 | 100   |
| 3979820 | atgattagac -   | STM3779 | 100    | STM1474 | 51     | STM3779 | 100   |
| 4009806 | atgcgtaact -   | STM3808 | 100    | STM2494 | 66.981 | STM3808 | 100   |
| 4010971 | gtgatgataa +   | STM3810 | 100    | STM0168 | 57.143 | STM3810 | 100   |
| 3680231 | atggctgcaa -   | STM3517 | 100    |         |        | STM3517 | 100   |
| 1206274 | atgcaatatg +   | STM1120 | 100    | STM1121 | 71     | STM1120 | 100   |
| 4280152 | gtgatacgcc +   | STM4070 | 100    | STM4064 | 87     | STM4070 | 100   |
| 4342984 | cagaggctcc +   | STM4124 | 100    | STM0912 | 30     | STM4124 | 100   |
| 4776066 | atggttgctg -   | STM4520 | 100    | STM4355 | 53.465 | STM4520 | 100   |
| 524539  | gggctctgtt +   | STM0467 | 100    | STM1057 | 46     | STM0467 | 100   |
| 1538853 | atgttcgatttt - | STM1464 | 100    | STM1223 | 65.094 | STM1464 | 100   |
| 890722  | atgaaaacc -    | STM0823 | 100    | STM3361 | 69.231 | STM0823 | 100   |
| 712285  | atggcacgcc +   | STM0649 | 100    | STM3103 | 60.952 | STM0649 | 100   |
| 2029151 | atgaagcctc +   | STM1934 | 100    | STM4261 | 88     | STM1934 | 100   |
| 2462079 | atgcagattct +  | STM2350 | 100    |         |        | STM2350 | 100   |
| P37321  | atggcacttta -  | PSLT045 | 100    | STM0416 | 61.682 | PSLT045 | 100   |
| P41287  | atgaagcca +    | PSLT049 | 100    | PSLT050 | 100    | PSLT049 | 100   |
| P62594  | atgttaattaa +  | PSLT076 | 100    | STM2746 | 60.194 | PSLT076 | 100   |
| P21431  | atgacacggt +   | PSLT030 | 100    | STM3135 | 71     | PSLT030 | 100   |
| P39411  | atgccgcag -    | PSLT047 | 100    | STM2610 | 59     | PSLT047 | 100   |
| P50387  | atgaactattc +  | PSLT060 | 100    | STM3427 | 63.303 | PSLT060 | 100   |
| P15764  | ctggaaggca +   | PSLT020 | 100    | STM3176 | 67     | PSLT020 | 67.57 |
| R18046  | -              | STM1818 | 63.725 | STM2126 | 56.364 | STM2126 | 2.92  |
|         |                | STM0326 | 100    | STM2043 | 72     | STM0326 | 100   |
| 2401661 | atgctaatagt -  | STM2293 | 100    | STM0593 | 71.287 | STM2293 | 100   |
|         |                | STM2354 | 100    | STM2355 | 77     | STM2354 | 100   |
|         |                | STM2421 | 100    | STM3113 | 72.549 | STM2421 | 100   |
|         |                | STM2474 | 100    | STM3076 | 85     | STM2474 | 100   |
|         |                | STM2481 | 100    | STM0475 | 87     | STM2481 | 100   |
|         |                | STM0066 | 100    | STM1976 | 60.577 | STM0066 | 95.6  |
|         |                | STM4547 | 46.078 | PSLT075 | 44.34  | STM4547 | 9.45  |
|         |                | STM0459 | 57     |         |        | STM0459 | 21.28 |
|         |                | STM0821 | 61.165 | STM0108 | 59.804 | STM0821 | 17.84 |
|         |                | STM1141 | 60.194 |         |        | STM1141 | 13.6  |
|         |                | STM0296 | 100    | STM0573 | 58     | STM0296 | 75.16 |
|         |                | STM0747 | 100    | STM0450 | 66.038 | STM0747 | 73.25 |
|         |                | STM1019 | 100    | STM2621 | 100    | STM1019 | 95    |
|         |                | STM2235 | 60.377 | STM0407 | 57.282 | STM2235 | 37.75 |
|         |                | STM3683 | 60.784 |         |        | STM3683 | 10.52 |
|         |                | STM0437 | 100    | STM0438 | 65.347 | STM0437 | 95.1  |

|                      |         |        |         |        |         |       |
|----------------------|---------|--------|---------|--------|---------|-------|
|                      | STM3275 | 61     | STM2862 | 60.194 | STM2862 | 17.95 |
|                      | PSLT023 | 61     |         |        | PSLT023 | 7.42  |
|                      | STM0268 | 57.843 |         |        | STM0268 | 9.35  |
|                      | STM0199 | 66     | STM1533 | 49.505 | STM0199 | 53.28 |
|                      | STM2238 | 59.615 | STM4499 | 57.426 | STM4499 | 15.59 |
|                      | STM0103 | 61.165 |         |        | STM0103 | 24.83 |
|                      | STM3709 | 62.136 |         |        | STM3709 | 6.53  |
|                      | STM2097 | 62.037 | STM0356 | 59.259 | STM0356 | 13.37 |
|                      | STM2178 | 50     |         |        | STM2178 | 23.48 |
|                      | STM2087 | 58     |         |        | STM2087 | 22.64 |
|                      | STM3691 | 64.078 | STM0301 | 63     | STM0301 | 9.03  |
|                      | STM2710 | 100    | STM3478 | 63.107 | STM2710 | 97.6  |
|                      | STM4246 | 78.431 | STM3724 | 61.765 | STM4246 | 15.66 |
|                      | STM0521 | 63.462 | STM1283 | 60.784 | STM0521 | 21.14 |
|                      | STM0293 | 64.151 |         |        | STM0293 | 6.83  |
|                      | PSLT013 | 93     | STM1584 | 71     | PSLT013 | 86.4  |
|                      | PSLT021 | 61.165 | STM2532 | 50.943 | PSLT021 | 12.27 |
|                      | STM1855 | 80     |         |        | STM1855 | 70.4  |
|                      | STM4500 | 87     | STM2414 | 64.706 | STM4500 | 73.95 |
|                      | STM3705 | 52.83  | STM3330 | 39     | STM3705 | 12.45 |
| 4012199 atgaaacaa:-  | STM3811 | 100    |         |        | STM3811 | 96.69 |
| 4035050 atggctattaa- | STM3831 | 100    | STM4010 | 68     | STM3831 | 100   |
| 4061513 atgagtatggl- | STM3854 | 100    | STM0428 | 73     | STM3854 | 100   |
| 3991144 atgatcaccg-  | STM3790 | 100    | STM2246 | 62     | STM3790 | 100   |
| 3472371 atgaagcag:-  | STM3302 | 100    | STM2581 | 61.538 | STM3302 | 100   |
| 3506466 atgctgttact- | STM3337 | 100    | STM1129 | 79     | STM3337 | 100   |
| 3483630 atgaaattca:+ | STM3318 | 100    | STM3146 | 61.386 | STM3318 | 100   |
| 3525064 atggaaccce-  | STM3356 | 100    | STM2333 | 62.745 | STM3356 | 100   |
| 3560690 atggcgaag:-  | STM3389 | 100    | STM0477 | 78     | STM3389 | 100   |
| 714477 atgaaaatta:+  | STM0651 | 100    | STM0161 | 77     | STM0651 | 100   |
| 744071 atgtatgcttta- | STM0683 | 100    | STM0054 | 68     | STM0683 | 100   |
| 772335 atgagtcgca-   | STM0705 | 100    | STM0498 | 74     | STM0705 | 100   |
| 1596731 atgatgtcgcc+ | STM1517 | 100    |         |        | STM1517 | 100   |
| 3826643 atgacatgga-  | STM3638 | 100    | STM0023 | 83     | STM3638 | 100   |
| 4046201 gtggtaagct+  | STM3840 | 100    | STM4477 | 63.366 | STM3840 | 100   |
| 4067032 atgacaaag:-  | STM3859 | 100    | STM3183 | 62.376 | STM3859 | 100   |
| 11245 atgcatctgt-    | STM0011 | 100    | STM1427 | 66     | STM0011 | 100   |
| 1332808 atgaaaaata+  | STM1246 | 100    | PSLT009 | 73     | STM1246 | 100   |
| 2780003 atgagcgag:-  | STM2640 | 100    | STM4247 | 58.654 | STM2640 | 100   |
| 4096540 atgaaaaccç+  | STM3885 | 100    | STM3793 | 63.725 | STM3885 | 100   |
| 80943 atgtgtgaaa:+   | STM0068 | 100    | STM3242 | 56     | STM0068 | 98.51 |
| 143492 atgaaagcaç+   | STM0122 | 100    | STM1836 | 79     | STM0122 | 100   |
| 185468 atgacgttgc-   | STM0157 | 100    | STM0157 | 65.385 | STM0157 | 100   |
| 3557528 atgaaagcç+   | STM3386 | 100    | STM3214 | 62.385 | STM3386 | 100   |
| 1569671 atgataaac-   | STM1491 | 100    | STM2163 | 77     | STM1491 | 100   |
| 3603122 atgctgcatac- | STM3449 | 100    | STM1974 | 58.654 | STM3449 | 100   |
| 1285266 atgaaatggt:+ | STM1201 | 100    | STM0484 | 63.366 | STM1201 | 100   |
| 1317145 atggaatacc-  | STM1229 | 100    | STM3407 | 64.423 | STM1229 | 100   |
| 1353387 atgggcattct+ | STM1274 | 100    | STM1797 | 69     | STM1274 | 100   |

|                        |         |             |                |       |
|------------------------|---------|-------------|----------------|-------|
| 2185439 atgagtttacg -  | STM2102 | 100         | STM2102        | 100   |
| 3644451 atgaagcgat -   | STM3488 | 100 STM3489 | 86 STM3488     | 100   |
| 1323210 atgttcaagc -   | STM1235 | 100 STM1301 | 58.879 STM1235 | 100   |
| 1354451 atgtttcagtta + | STM1276 | 100         | STM1276        | 100   |
| 2189943 atgataatgc -   | STM2105 | 100 STM2084 | 72 STM2105     | 100   |
| 2227446 atgttctggatt + | STM2134 | 100 STM2043 | 54.369 STM2134 | 100   |
| 2885570 atgaaacgc +    | STM2745 | 100 STM3776 | 56.863 STM2745 | 100   |
| 1369688 atgactatca -   | STM1290 | 100 STM2558 | 66.038 STM1290 | 100   |
| 2211520 atgagtaaac +   | STM2123 | 100 STM3388 | 83.168 STM2123 | 100   |
| 9319 atggatacct +      | STM0008 | 100 STM0803 | 71.287 STM0008 | 100   |
| 328931 gtgaaaaagi +    | STM0287 | 100 STM0757 | 62.037 STM0287 | 100   |
| 360206 atgggcaatt +    | STM0314 | 100 STM3937 | 64.545 STM0314 | 100   |
| 1132720 atggcaacgc +   | STM1046 | 100 STM1047 | 100 STM1047    | 100   |
| 4331111 atgaccatc +    | STM4114 | 100 STM0843 | 60.748 STM4114 | 100   |
| 4522054 ttgcataatct +  | STM4281 | 100 STM2249 | 85 STM4281     | 100   |
| 3080104 gtgtatctct -   | STM2939 | 100 STM2643 | 62.745 STM2939 | 100   |
| 2520368 atgttccacc +   | STM2404 | 100 STM1049 | 65.686 STM2404 | 100   |
| 2559708 atgaagagta -   | STM2448 | 100 PSLT104 | 63.462 STM2448 | 100   |
| 1004271 atgggtatcc -   | STM0929 | 100 STM3429 | 60.194 STM0929 | 100   |
| 977156 atgaaaatgc +    | STM0906 | 100 STM2237 | 68 STM0906     | 100   |
|                        | STM0922 | 100 STM0923 | 100 STM0923    | 100   |
| 2665318 atgggttttati - | STM2530 | 100 STM4305 | 75 STM2530     | 100   |
| 2706172 atgaatttaag -  | STM2563 | 100 STM1183 | 62.857 STM2563 | 100   |
| 4240095 atgagaactc -   | STM4030 | 100 STM2560 | 47 STM4030     | 100   |
| 4426922 atgaaaatttc -  | STM4205 | 100 STM0558 | 82 STM4205     | 100   |
| 3000154 atgcacgaa +    | STM2854 | 100 STM3144 | 67 STM2854     | 100   |
| 3075299 atggatcaaa -   | STM2935 | 100         | STM2935        | 100   |
| 963937 atgacgtctt -    | STM0893 | 100 STM1005 | 81 STM0893     | 100   |
| 2583480 atgaaccagc +   | STM2473 | 100 STM0007 | 84 STM2473     | 100   |
| 1036196 atgggcacgc -   | STM0958 | 100 STM0609 | 62 STM0958     | 100   |
| 1075410 atgagtttcgtr + | STM0988 | 100 STM1993 | 65.347 STM0988 | 100   |
| 1060460 atgacgcaa -    | STM0975 | 100 STM0490 | 60.952 STM0975 | 100   |
| 2742000 atggcgccgc -   | STM2590 | 100 STM2591 | 100 STM2591    | 100   |
| 4643591 ttgcgccttaa +  | STM4406 | 100 STM4298 | 61.538 STM4406 | 100   |
| 2389963 atgttgagtati - | STM2283 | 100 STM2198 | 81 STM2283     | 100   |
| 2456606 atgaaaatca -   | STM2343 | 100 STM0618 | 63.636 STM2343 | 100   |
| 2021011 gtgcttatctta - | STM1923 | 100         | STM1923        | 100   |
| 2477364 atggcgagta -   | STM2364 | 100 STM1882 | 62.5 STM2364   | 100   |
| 1305816 atggcgctgc +   | STM1219 | 100 STM4479 | 60.185 STM1219 | 100   |
| 1504193 atgtttacggg +  | STM1426 | 100 STM2491 | 61.165 STM1426 | 100   |
| 1324213 atcgcgcaat -   | STM1237 | 100 STM4193 | 74 STM1237     | 90.24 |
| 29978 atgaacagat +     | STM0025 | 100 STM1088 | 63.107 STM0025 | 100   |
| 2069764 atgctctcaat +  | STM1986 | 100 STM1624 | 93.069 STM1986 | 100   |
| 1404993 atggccagtg -   | STM1325 | 100 STM1610 | 56.863 STM1325 | 100   |
| 4613502 atgtcacaag +   | STM4368 | 100 STM3504 | 61.765 STM4368 | 100   |
| 4639028 atgattgctatr - | STM4401 | 100 STM3495 | 64.762 STM4401 | 100   |
| 4670359 atgaaaggc +    | STM4426 | 100         | STM4426        | 100   |
| 4729741 atggccgggc +   | STM4485 | 100 STM3542 | 69.307 STM4485 | 100   |
| 4756931 atgaaagtca +   | STM4502 | 100 STM2473 | 64 STM4502     | 100   |
| 2387414 atgacactaa +   | STM2281 | 100 STM3834 | 61 STM2281     | 100   |
| 2423466 atgcttaacgc -  | STM2315 | 100 STM4369 | 66.667 STM2315 | 100   |
| 2456313 atgtttatcctt - | STM2342 | 100 STM2552 | 66.667 STM2342 | 100   |



|                       |         |     |         |        |         |       |
|-----------------------|---------|-----|---------|--------|---------|-------|
| 2021720 atgataatga:-  | STM1924 | 100 | STM3464 | 91     | STM1924 | 100   |
| 2851281 atggctcagg-   | STM2701 | 100 | STM4213 | 59.434 | STM2701 | 100   |
| 2577359 atgaacgattt-  | STM2467 | 100 | STM0352 | 66.019 | STM2467 | 100   |
| 2795676 atggcagaa:-   | STM2654 | 100 | STM0689 | 84     | STM2654 | 100   |
| 411176 atgaccatcg+    | STM0361 | 100 | STM0741 | 79     | STM0361 | 100   |
| 2099143 atgagtaagc-   | STM2017 | 100 | STM0992 | 53.774 | STM2017 | 100   |
| 4439817 atgacagag:-   | STM4220 | 100 | STM0094 | 64.762 | STM4220 | 100   |
| 2968491 ttgatcccg:-   | STM2818 | 100 |         |        | STM2818 | 100   |
| 1433495 atgctggatg:-  | STM1352 | 100 | STM0077 | 73     | STM1352 | 100   |
| 2066063 atgcgccggtt+  | STM1979 | 100 | STM1419 | 72     | STM1979 | 100   |
| 3017520 atggaaacat-   | STM2874 | 100 |         |        | STM2874 | 100   |
| 2010290 atggctaact-   | STM1913 | 100 | STM2896 | 76     | STM1913 | 100   |
| 2175112 gtgtctcatatt- | STM2093 | 100 |         |        | STM2093 | 100   |
| 4092078 atgaagaaa+    | STM3881 | 100 | STM4130 | 61.682 | STM3881 | 100   |
| 256131 atggctgaaa+    | STM0217 | 100 | STM0442 | 63     | STM0217 | 92.21 |
| 438037 atgaaaataa+    | STM0384 | 100 | STM1151 | 56.604 | STM0384 | 100   |
| 4416348 atgctgaccg+   | STM4193 | 100 | STM2222 | 69     | STM4193 | 100   |
| 88203 atgaaaaatg-     | STM0074 | 100 | STM3501 | 61     | STM0074 | 100   |
| 1390025 atgaataacc-   | STM1309 | 100 | STM1180 | 61.905 | STM1309 | 100   |
| 1439421 gtgtctctgc-   | STM1357 | 100 | STM4047 | 92     | STM1357 | 100   |
| 1538497 atgattgatatt- | STM1463 | 100 | STM2842 | 61.905 | STM1463 | 100   |
| 1108645 atgagcaac+    | STM1017 | 100 | STM2623 | 100    | STM1017 | 100   |
| 4715489 atgaataatgi-  | STM4473 | 100 | STM1428 | 65.686 | STM4473 | 100   |
| 603568 atggcagca:-    | STM0542 | 100 |         |        | STM0542 | 100   |
| 2743182 atggaacat-    | STM2593 | 100 | STM0919 | 77     | STM2593 | 100   |
| 4819649 atgaacaac:-   | STM4565 | 100 | STM0970 | 63.725 | STM4565 | 100   |
| 3896503 atgtcagaac-   | STM3701 | 100 | STM3121 | 61.165 | STM3701 | 100   |
| 3668658 atgaatgaca-   | STM3509 | 100 | STM3630 | 62.136 | STM3509 | 100   |
| 4376360 atgatccac+    | STM4157 | 100 | STM2137 | 77     | STM4157 | 100   |
| 1872501 atgacaattg:-  | STM1774 | 100 | STM4278 | 59.804 | STM1774 | 100   |
| 574780 atgcaagac:-    | STM0513 | 100 | STM2958 | 59.633 | STM0513 | 100   |
| 2746982 atgtttctcaat- | STM2596 | 100 | STM1039 | 69.608 | STM2596 | 100   |
| 1115662 atgatgagaa+   | STM1028 | 100 | STM2612 | 100    | STM1028 | 100   |
| 4638099 atgattagcg:-  | STM4400 | 100 | STM2485 | 63.366 | STM4400 | 100   |
|                       | STM1026 | 100 | STM2614 | 100    | STM2614 | 100   |
| 2796235 ttggctatcaa-  | STM2655 | 100 | STM3301 | 61.321 | STM2655 | 100   |
| 3371848 gtgatggatal-  | STM3206 | 100 | STM3504 | 67     | STM3206 | 100   |
| 3702812 atgcaggtttt:- | STM3535 | 100 |         |        | STM3535 | 100   |
| 3931159 atgctgttgca+  | STM3738 | 100 | STM0205 | 59.804 | STM3738 | 100   |
| 2687486 atggctatca+   | STM2548 | 100 | STM4416 | 74     | STM2548 | 100   |
| 1287802 atgtttaagaa+  | STM1203 | 100 | STM0685 | 74     | STM1203 | 100   |
| 4209884 ttgactaacct-  | STM4001 | 100 |         |        | STM4001 | 100   |
| 897990 atgagtaccg-    | STM0831 | 100 |         |        | STM0831 | 100   |
| 871627 atggcttcac+    | STM0802 | 100 | STM0419 | 63.208 | STM0802 | 96.77 |
| 1500434 atggcacaa+    | STM1421 | 100 | STM2585 | 56.436 | STM1421 | 100   |
| 2565112 atgaaaaag:-   | STM2454 | 100 | STM1512 | 65.094 | STM2454 | 100   |
| 4285036 atgcaaatca+   | STM4074 | 100 | STM3882 | 70     | STM4074 | 100   |
| 704743 ttgcagggtat:-  | STM0642 | 100 | STM0175 | 61.165 | STM0642 | 100   |
| 306726 atgaccggc:-    | STM0267 | 100 | PSLT023 | 77.228 | STM0267 | 100   |
| 2152997 atgagcactg+   | STM2073 | 100 | STM2402 | 70     | STM2073 | 100   |
| 1788966 atgggtgaa+    | STM1696 | 100 | STM0192 | 68.317 | STM1696 | 100   |
| 439241 atgttcccaa+    | STM0385 | 100 | STM4551 | 67.308 | STM0385 | 100   |

|         |               |         |     |         |        |         |       |
|---------|---------------|---------|-----|---------|--------|---------|-------|
| 1910068 | atgtctgaacç-  | STM1810 | 100 | STM1339 | 59.804 | STM1810 | 100   |
| 2225846 | atgacagaa:+   | STM2132 | 100 |         |        | STM2132 | 100   |
| 734321  | gtgttcagcgt-  | STM0669 | 100 | STM1126 | 64     | STM0669 | 100   |
| 4530502 | atgtcattacc-  | STM4289 | 100 |         |        | STM4289 | 100   |
| 2002360 | atggcgaact-   | STM1908 | 100 |         |        | STM1908 | 100   |
| 4499153 | atgggaaata+   | STM4261 | 100 | STM3533 | 62     | STM4261 | 100   |
| 3913497 | atggattcattl- | STM3717 | 100 | STM3718 | 61     | STM3717 | 100   |
| 1952734 | gtgactaaca-   | STM1855 | 100 | STM2743 | 58.559 | STM1855 | 100   |
| 4385209 | atgaccgaac+   | STM4167 | 100 |         |        | STM4167 | 100   |
| 4076383 | atggccggcç-   | STM3866 | 100 | STM4532 | 88     | STM3866 | 100   |
| 2366579 | atgaaagtta:-  | STM2267 | 100 | STM1473 | 86     | STM2267 | 100   |
| 878353  | atgaaatgçg-   | STM0812 | 100 | STM0956 | 86     | STM0812 | 99.76 |
| 469840  | atgcattgcc+   | STM0415 | 100 | STM4211 | 59.223 | STM0415 | 98.9  |
| 4267159 | atgagttatac+  | STM4055 | 100 | STM1431 | 66     | STM4055 | 99.5  |
| 2138085 | atgaatactat-  | STM2063 | 100 | STM3024 | 57.426 | STM2063 | 100   |
| 1782415 | atgggtattttl- | STM1690 | 100 | STM4440 | 60.577 | STM1690 | 100   |
| 2822177 | atgagtagta:-  | STM2681 | 100 | STM3146 | 63.107 | STM2681 | 100   |
| 3588490 | atggctcaca-   | STM3423 | 100 | STM0305 | 57     | STM3423 | 100   |
| 3918893 | atgcgttttcat- | STM3723 | 100 | STM2360 | 63.551 | STM3723 | 100   |
| 4195681 | gtgaaaacat+   | STM3987 | 100 | STM0611 | 60     | STM3987 | 100   |
| 2728571 | atgaagaacç-   | STM2583 | 100 | STM3446 | 63     | STM2583 | 100   |
| 4152225 | atgaaaaacç+   | STM3946 | 100 |         |        | STM3946 | 100   |
| 4126843 | atgaatcttac+  | STM3917 | 100 | STM1545 | 68     | STM3917 | 100   |
| 2064949 | atgagtgaca+   | STM1977 | 100 | STM2345 | 62.5   | STM1977 | 100   |
| 1902675 | atgaccggcç-   | STM1802 | 100 | STM4247 | 67.961 | STM1802 | 100   |
| 2495626 | atggcagga:-   | STM2384 | 100 | STM2947 | 64.356 | STM2384 | 100   |
| 2435988 | atgaaaaacç-   | STM2324 | 100 | STM0285 | 59.804 | STM2324 | 100   |
| 3926600 | atgaaaccgt-   | STM3733 | 100 | STM0602 | 78.431 | STM3733 | 100   |
| 2850099 | atggctttacc-  | STM2700 | 100 | STM0963 | 51.485 | STM2700 | 100   |
| 3034345 | atggggaatgç-  | STM2890 | 100 | STM1979 | 72     | STM2890 | 100   |
| 4257311 | atgaccactc-   | STM4046 | 100 | STM1570 | 60.396 | STM4046 | 100   |
| 4180758 | atgggtggtal+  | STM3973 | 100 | STM0632 | 68     | STM3973 | 100   |
| 3339205 | atgagcgata-   | STM3174 | 100 | STM2272 | 76     | STM3174 | 100   |
| 2526505 | atggaccggcç+  | STM2409 | 100 |         |        | STM2409 | 100   |
| 4110619 | atgaacgggç+   | STM3901 | 100 | STM3796 | 74     | STM3901 | 100   |
| 117936  | atgttagaag:-  | STM0101 | 100 | STM3677 | 83     | STM0101 | 93.05 |
| 3072955 | atggcgctgc-   | STM2933 | 100 | STM2934 | 74     | STM2933 | 90.99 |
| 3063775 | atgagattgai+  | STM2921 | 100 | STM2356 | 67.327 | STM2921 | 100   |
| 4219996 | atgcatatçç-   | STM4010 | 100 | STM0437 | 79     | STM4010 | 100   |
| 587847  | atgaagattgi+  | STM0525 | 100 | STM3247 | 77     | STM0525 | 100   |
| 1048393 | atgacaaccç+   | STM0965 | 100 | STM1497 | 100    | STM0965 | 100   |
| 636401  | atgatcaaatt-  | STM0576 | 100 | STM0747 | 60.952 | STM0576 | 100   |
| 1728426 | atggcgctac+   | STM1637 | 100 | STM4464 | 87     | STM1637 | 100   |
| 1812389 | atgggtaaagç-  | STM1714 | 100 | STM1298 | 69.903 | STM1714 | 100   |
| 1649551 | atgagtaagçl-  | STM1568 | 100 | STM4035 | 74     | STM1568 | 100   |
| 1915149 | ttgaattacca-  | STM1817 | 100 | STM1326 | 61.682 | STM1817 | 100   |
| 1741018 | atgaaactcg+   | STM1647 | 100 | STM1099 | 59.615 | STM1647 | 100   |
| 1961336 | atgaaaacgç+   | STM1864 | 100 |         |        | STM1864 | 99.03 |
| 1767922 | atgactacaa-   | STM1674 | 100 | STM1296 | 63.107 | STM1674 | 100   |
| 1990684 | gtgataggca-   | STM1895 | 100 | STM3731 | 69.608 | STM1895 | 100   |
| 597625  | atgtcttcccçg- | STM0534 | 100 | STM0530 | 61.538 | STM0534 | 100   |
| 638727  | gtggctcgctç-  | STM0580 | 100 | STM2729 | 61.386 | STM0580 | 100   |

|                         |         |              |                |     |
|-------------------------|---------|--------------|----------------|-----|
| 1748244 atgcaagaa: +    | STM1654 | 100          | STM1654        | 100 |
| 1670137 atgccatata: -   | STM1583 | 100 STM4456  | 62 STM1583     | 100 |
| 388683 ttgaaagtaa: +    | STM0343 | 100 STM2215  | 67 STM0343     | 100 |
| 1868676 atgcaaaaata +   | STM1769 | 100 STM2107  | 64.078 STM1769 | 100 |
| 1697484 atgcgctctgtt: + | STM1606 | 100 STM0214  | 64 STM1606     | 100 |
| 1967922 gtggcgcttat +   | STM1871 | 100 STM1861  | 92 STM1871     | 100 |
| 1993749 gtgtcgattatt -  | STM1898 | 100 STM2842  | 65.686 STM1898 | 100 |
| 4005775 atggaaaac: +    | STM3802 | 100 STM1495  | 59 STM3802     | 100 |
| 3139649 atgtcagtggt -   | STM2987 | 100 STM2034  | 62.264 STM2987 | 100 |
| 2854025 gtggatatacc: -  | STM2705 | 100 STM3858  | 58.095 STM2705 | 100 |
| 3247898 ttgtttacacta -  | STM3084 | 100 STM1805  | 61 STM3084     | 100 |
| 3294023 atgccacgta -    | STM3133 | 100          | STM3133        | 100 |
| 4124692 atgagcaaa: -    | STM3914 | 100 STM0820  | 71 STM3914     | 100 |
| 3847789 atgcaggctt: -   | STM3661 | 100 STM4519  | 57.843 STM3661 | 100 |
| 1272022 cgcgtcgcce: +   | STM1186 | 100 STM0514  | 60.185 STM1186 | 100 |
| 3118729 atgtcttctat: +  | STM2968 | 100 STM3152  | 62.136 STM2968 | 100 |
| 2826334 gtggattatttt: - | STM2687 | 100 STM1061  | 61.321 STM2687 | 100 |
| 3215010 atgacacag: -    | STM3053 | 100 STM4356  | 61.765 STM3053 | 100 |
| 3266527 atggagtttttc -  | STM3106 | 100 STM3598  | 72 STM3106     | 100 |
| 4350750 atggctacca +    | STM4131 | 100 STM4130  | 74 STM4131     | 100 |
| 3268530 atgaaaaac: -    | STM3109 | 100 STM1128  | 58 STM3109     | 100 |
| 682368 atgtcttatcc -    | STM0618 | 100 STM3166  | 62.745 STM0618 | 100 |
|                         | STM2211 | 100 STM2210  | 97 STM2211     | 100 |
| 2946340 atgacagag: +    | STM2797 | 100 STM4123  | 64.423 STM2797 | 100 |
| 1783566 atggctgaatt +   | STM1691 | 100 STM4174  | 79 STM1691     | 100 |
| 3199143 atgactgagg +    | STM3039 | 100 STM2295  | 63.366 STM3039 | 100 |
| 415444 atggagccgt -     | STM0365 | 100          | STM0365        | 100 |
| 3839141 atgaaaatca -    | STM3653 | 100 STM2546  | 55 STM3653     | 100 |
| 2302580 atgacagaar +    | STM2202 | 100 STM2461  | 68 STM2202     | 100 |
| 2337527 atgcctcata: -   | STM2237 | 100 STM0906  | 68 STM2237     | 100 |
| 2256145 atgtacgagtt -   | STM2159 | 100 STM4380  | 67 STM2159     | 100 |
| 2292179 atggaaatgc +    | STM2194 | 100 STM4188  | 77 STM2194     | 100 |
| 2191163 atgaagatcc -    | STM2106 | 100 STM3477  | 65.714 STM2106 | 100 |
| 2260071 gtgagtgatg: -   | STM2164 | 100 STM3375  | 62.376 STM2164 | 100 |
| 3889527 atgattatttca +  | STM3694 | 100 STM4454  | 60.396 STM3694 | 100 |
| 3596186 atgattggttta -  | STM3440 | 100 STM2241  | 57.426 STM3440 | 100 |
| 4601683 atgatttatcgr +  | STM4358 | 100 STM2991  | 65 STM4358     | 100 |
| 3592429 atgttacaacc -   | STM3433 | 100 STM0447  | 56 STM3433     | 100 |
| 3198333 atggttttgag: -  | STM3038 | 100 STM2925  | 76 STM3038     | 100 |
| 4622949 atgatagcga +    | STM4380 | 100 STM1523  | 67 STM4380     | 100 |
| 4807477 atggaaaac: +    | STM4548 | 100 STM4548  | 63 STM4548     | 100 |
| 4579569 atggcgcata -    | STM4333 | 100 STM0768  | 58 STM4333     | 100 |
| 2252471 atgaaaatttc +   | STM2156 | 100 STM2156A | 72 STM2156     | 100 |
| 731710 atggcatttgc -    | STM0666 | 100 STM4227  | 59 STM0666     | 100 |
| 3255309 atgaaaacc: +    | STM3092 | 100 STM0602  | 62.857 STM3092 | 100 |
| 1168488 atggaactga +    | STM1075 | 100 STM3951  | 66.337 STM1075 | 100 |
| 846448 atggcgcatt: +    | STM0781 | 100          | STM0781        | 100 |
| 921543 atgacgcaat +     | STM0849 | 100 STM0705  | 64.706 STM0849 | 100 |
| 3487662 atggtactgat +   | STM3323 | 100 STM3961  | 62.037 STM3323 | 100 |
| 851603 gtgaatacatt -    | STM0786 | 100 STM1781  | 51.923 STM0786 | 100 |
| 892404 atgtccgcc: +     | STM0826 | 100 STM3130  | 63.636 STM0826 | 100 |
| 3215562 atgagcaac: -    | STM3054 | 100 STM0978  | 90 STM3054     | 100 |

|         |               |         |                |                |       |
|---------|---------------|---------|----------------|----------------|-------|
| 303338  | atgcttaaac:-  | STM0263 | 100            | STM0263        | 100   |
| 3392004 | atgatacgttt:+ | STM3223 | 100            | STM3223        | 100   |
| 1483927 | atgatgataa:+  | STM1397 | 100 STM1777    | 56.436 STM1397 | 100   |
| 885356  | atgaatattcc-  | STM0819 | 100 STM1122    | 66 STM0819     | 100   |
| 939727  | atgcagaatc+   | STM0866 | 100 STM4517    | 70 STM0866     | 100   |
| 465673  | atgaaaaact+   | STM0409 | 100 STM0452    | 61.321 STM0409 | 100   |
| 2822368 | atgtgtcgtga-  | STM2682 | 100 STM1848    | 89 STM2682     | 100   |
| 4751240 | gtgctcgatc-   | STM4497 | 100 STM4363    | 68 STM4497     | 100   |
| 4785936 | atgccgatgg+   | STM4528 | 100 STM3380    | 54.455 STM4528 | 100   |
| 4563341 | atgatctccac+  | STM4318 | 100 STM3109    | 62.385 STM4318 | 100   |
| 4424282 | atgaacacg:-   | STM4203 | 100 STM4123    | 77 STM4203     | 100   |
| 4442497 | atgatgaaa+    | STM4222 | 100            | STM4222        | 100   |
| 4419133 | atggattacg:-  | STM4197 | 100 STM2902    | 61.765 STM4197 | 100   |
| 4400684 | atgatgattaa-  | STM4181 | 100            | STM4181        | 100   |
| 2098373 | atgcagacac-   | STM2016 | 100 STM4272    | 61.165 STM2016 | 97.28 |
| 2883465 | atgaaaatcc+   | STM2744 | 100            | STM2744        | 100   |
| 2875270 | atgctgactac-  | STM2735 | 100 STM2734    | 71 STM2735     | 100   |
| 2876062 | atgagtactg:-  | STM2737 | 100 STM4310    | 60.396 STM2737 | 100   |
| 3451893 | atgtctctaag-  | STM3283 | 100 PSLT110    | 67 STM3283     | 100   |
| 3206668 | atggatattca-  | STM3047 | 100 STM0153    | 52 STM3047     | 100   |
| 3428894 | atgaaacgta+   | STM3259 | 100 STM2840    | 63 STM3259     | 100   |
| 1679309 | atgaaccagt+   | STM1591 | 100 STM2129    | 62.136 STM1591 | 100   |
| 1610392 | atgactatctc-  | STM1534 | 100 STM2993    | 59.223 STM1534 | 100   |
| 1701581 | atggtggaag-   | STM1611 | 100 STM2956    | 71.154 STM1611 | 100   |
| 3565843 | atgaaaagat+   | STM3392 | 100 STM4307    | 51.961 STM3392 | 100   |
| 92031   | atgacatctcc+  | STM0078 | 100 STM1351    | 77 STM0078     | 100   |
| 1579855 | atgatgaaa-    | STM1500 | 100 STM1732    | 56.731 STM1500 | 100   |
| 2703997 | atgaaaaag:-   | STM2561 | 100 STM0462    | 85 STM2561     | 100   |
|         |               | STM2509 | 100 STM0555    | 96 STM2509     | 100   |
| 2562454 | atgcaaacac+   | STM2452 | 100 STM4572    | 61.538 STM2452 | 100   |
| 2712396 | ttggtgtgctc+  | STM2566 | 100 STM3166    | 89 STM2566     | 100   |
| 2609833 | atgaccgacac+  | STM2495 | 100 STM4579    | 61.905 STM2495 | 100   |
| 2678195 | atgccgaag:-   | STM2538 | 100 STM0730    | 61.386 STM2538 | 100   |
| 790692  | atgtatttttac+ | STM0724 | 100 STM2087    | 60.952 STM0724 | 100   |
| 698292  | atgaaaacc:-   | STM0636 | 100 STM1345    | 59.804 STM0636 | 100   |
| 2411323 | atgggcgtaa+   | STM2303 | 100            | STM2303        | 100   |
| P40785  | atgctgccgg+   | PSLT048 | 100 STM1712    | 62.376 PSLT048 | 100   |
| P19420  | gtggccattcc-  | PSLT026 | 100 STM0141    | 59.223 PSLT026 | 100   |
| P33966  | atgccgatca+   | PSLT042 | 100 STM1323    | 61.905 PSLT042 | 100   |
| P07919  | atggcgtctg:-  | PSLT012 | 100 STM0019    | 61.386 PSLT012 | 100   |
| P03870  | atgtcgctgcac+ | PSLT007 | 100 PSLT010    | 100 PSLT007    | 100   |
| P08116  | atgagtgaati-  | PSLT013 | 100 STM4097    | 50.962 PSLT013 | 100   |
| P87203  | atgatggaaa-   | PSLT105 | 100 PSLT107    | 100 PSLT105    | 100   |
| P61628  | ttgactggcgc:- | PSLT074 | 100 STM2189    | 48.039 PSLT074 | 100   |
| R1027   | -             | STM1837 | 45.098 STM2089 | 37 STM1837     | 23.01 |
|         |               | STM0353 | 100 STM0498    | 73 STM0353     | 100   |
|         |               | STM0476 | 100 STM3390    | 73 STM0476     | 100   |
|         |               | STM0498 | 100 STM0353    | 69.307 STM0498 | 100   |
|         |               | STM0522 | 100 STM1444    | 62.037 STM0522 | 100   |
|         |               | STM0558 | 100 STM4205    | 67 STM0558     | 100   |
|         |               | STM0600 | 100 STM4532    | 91 STM0600     | 100   |
|         |               | STM1215 | 100 STM1375    | 69 STM1215     | 98.45 |

|                        |         |        |         |         |         |       |
|------------------------|---------|--------|---------|---------|---------|-------|
|                        | STM3217 | 60.185 | STM0142 | 55.34   | STM3217 | 10.84 |
|                        | STM4216 | 79     | STM3624 | 61.165  | STM4216 | 57.53 |
|                        | STM0306 | 46     | STM0994 | 39.604  | STM0306 | 13.69 |
|                        | STM1268 | 94     | STM1268 | 53.922  | STM1268 | 95.5  |
|                        | STM1918 | 62.264 | STM4261 | 60.377  | STM4261 | 13.02 |
|                        | STM0498 | 61.682 | STM2463 | 59.615  | STM2463 | 18.36 |
|                        | STM2356 | 61.386 | STM0055 | 58.252  | STM2356 | 22.68 |
|                        | STM2702 | 90     | STM2772 | 74      | STM2702 | 67.88 |
|                        | STM0627 | 62.617 | STM1764 | 61.682  | STM0790 | 14.95 |
|                        | STM2977 | 64.706 | STM1683 | 58.654  | STM1683 | 15.69 |
|                        | STM3746 | 25     |         | STM3746 | 16.02   |       |
|                        | STM4208 | 75.248 | STM0014 | 55.34   | STM4208 | 38.64 |
|                        | STM0016 | 71     | STM2085 | 66.055  | STM0016 | 55.23 |
|                        | STM2706 | 94     | STM2703 | 60      | STM2706 | 17.07 |
|                        | STM2616 | 91     | STM0896 | 64.356  | STM2616 | 48.84 |
|                        | STM1965 | 56.731 |         | STM1965 | 13.81   |       |
|                        | STM4202 | 79     |         | STM4202 | 40.74   |       |
|                        | STM1324 | 61.765 | STM1355 | 37      | STM1324 | 15.62 |
|                        | STM0193 | 60.194 |         | STM0193 | 13.54   |       |
|                        | STM4453 | 39     |         | STM4453 | 3.49    |       |
|                        | STM0564 | 58.416 |         | STM0564 | 18.3    |       |
|                        | STM2087 | 74     | STM0855 | 60.577  | STM2087 | 60.59 |
|                        | STM0090 | 62.376 | STM3976 | 59.434  | STM3976 | 39.58 |
|                        | STM3191 | 60     | STM1392 | 59.406  | STM1392 | 11.74 |
|                        | STM4159 | 56.604 |         | STM4159 | 4.58    |       |
|                        | STM1436 | 59.223 | STM4261 | 58.824  | STM4261 | 9.37  |
|                        | STM0650 | 62.162 | STM2589 | 54      | STM0650 | 20.62 |
|                        | PSLT032 | 67.619 |         | PSLT032 | 15.3    |       |
|                        | STM4413 | 60.952 | STM2882 | 57.944  | STM4413 | 28.98 |
|                        | STM1365 | 60.396 | STM1356 | 59      | STM1365 | 1.85  |
|                        | STM2720 | 100    | STM2978 | 57.282  | STM2720 | 93.85 |
|                        | STM1005 | 68     | STM0642 | 62.963  | STM0642 | 5.95  |
|                        | STM3280 | 60.577 |         | STM3280 | 12.7    |       |
| 3201627 atgactcagg -   | STM3041 | 100    | STM1776 | 79      | STM3041 | 80.25 |
| 2510504 atgaagggg:-    | STM2397 | 100    | STM1386 | 73      | STM2397 | 100   |
| 2108533 atgtcagaga -   | STM2029 | 100    | STM0489 | 76.238  | STM2029 | 100   |
| 3746485 atgaaaaata +   | STM3577 | 100    | STM1919 | 87      | STM3577 | 100   |
| 144966 gtggcagatc +    | STM0123 | 100    |         | STM0123 | 100     |       |
| 188454 gtgctagaag +    | STM0158 | 100    | STM2305 | 63.725  | STM0158 | 100   |
| 171810 atggcaaact -    | STM0148 | 100    | STM2515 | 61      | STM0148 | 100   |
| 205070 atgaagaatti -   | STM0174 | 100    | STM3513 | 70.476  | STM0174 | 100   |
| 227663 atgctgattt: +   | STM0193 | 100    | STM3011 | 59.804  | STM0193 | 100   |
| 278163 atgaacatca +    | STM0234 | 100    | STM2559 | 83      | STM0234 | 100   |
| 1592903 atgagattag: -  | STM1514 | 100    | STM2830 | 67      | STM1514 | 100   |
| 3827985 atggagttttta - | STM3640 | 100    | STM0543 | 61.386  | STM3640 | 100   |
| 759733 atgaaaacg: +    | STM0697 | 100    | STM2364 | 56      | STM0697 | 100   |
| 2055007 gtgatcggtgt +  | STM1965 | 100    | STM3543 | 65.049  | STM1965 | 100   |
| 3907297 atgaaaatttt: + | STM3711 | 100    | STM3712 | 60.396  | STM3711 | 100   |
| 2104417 atgaacggta -   | STM2024 | 100    | STM2745 | 56.19   | STM2024 | 100   |
| 1823069 atgcaaacc: +   | STM1725 | 100    | STM4160 | 68.317  | STM1725 | 100   |

|                       |         |     |         |        |         |       |
|-----------------------|---------|-----|---------|--------|---------|-------|
| 94547 atgaaacca+      | STM0081 | 100 | STM2532 | 54.455 | STM0081 | 100   |
| 4060725 atggacagtc-   | STM3853 | 100 | STM2976 | 62.037 | STM3853 | 100   |
| 16432 atgtctattccc+   | STM0015 | 100 |         |        | STM0015 | 100   |
| 3269737 atgcaagcgt+   | STM3110 | 100 | STM0776 | 59     | STM3110 | 100   |
| 3478938 atgctgttaaa-  | STM3312 | 100 | STM2971 | 70     | STM3312 | 100   |
| 3515260 atgttcacgac+  | STM3347 | 100 | STM1694 | 65     | STM3347 | 100   |
| 694776 atgggtgaga+    | STM0632 | 100 | STM3973 | 68     | STM0632 | 100   |
| 1198040 atggaatgga-   | STM1110 | 100 | PSLT072 | 59.804 | STM1110 | 100   |
| 1240790 gtgcgtatatt+  | STM1152 | 100 | STM3201 | 64.078 | STM1152 | 100   |
| 3653464 atgaaagaa+    | STM3497 | 100 | STM2293 | 61.111 | STM3497 | 100   |
| 3686451 atgcgaaaa+    | STM3522 | 100 | STM4005 | 73.529 | STM3522 | 100   |
| 3713987 atgatctactt-  | STM3544 | 100 | STM1640 | 57.843 | STM3544 | 100   |
| 4801951 gtgctgatata-  | STM4541 | 100 |         |        | STM4541 | 100   |
| 1290061 atgtctttcatt- | STM1204 | 100 | STM0030 | 70     | STM1204 | 100   |
| 3690831 atggaagag-    | STM3527 | 100 | STM4572 | 55     | STM3527 | 100   |
| 3722746 atgaaacgct+   | STM3552 | 100 | STM2594 | 64.035 | STM3552 | 100   |
| 4804637 atgggtataal-  | STM4545 | 100 | STM2975 | 52.885 | STM4545 | 100   |
| 4842669 atgttacaggt+  | STM4585 | 100 | STM0772 | 52     | STM4585 | 100   |
| 340352 gtgtaacga+     | STM0295 | 100 | STM2478 | 60.784 | STM0295 | 100   |
| 3744642 atgtcgaccc+   | STM3576 | 100 | STM0705 | 73.077 | STM3576 | 100   |
| 4828875 gtgaagtatt-   | STM4572 | 100 | STM0023 | 63.366 | STM4572 | 100   |
| 2869623 atgtcaatca-   | STM2726 | 100 |         |        | STM2726 | 100   |
| 2888219 atgctttgcttt+ | STM2747 | 100 | STM2088 | 77     | STM2747 | 100   |
| 2906071 atggcaaaa+    | STM2763 | 100 | STM2740 | 66     | STM2763 | 100   |
| 2937538 atggataacct+  | STM2788 | 100 | STM3474 | 50.485 | STM2788 | 100   |
| 4465368 atgctggaac+   | STM4244 | 100 | STM2493 | 66.346 | STM4244 | 100   |
| 4538399 atgaggatttg-  | STM4295 | 100 | STM2867 | 62.745 | STM4295 | 100   |
| 941804 atgaccgtcc-    | STM0868 | 100 |         |        | STM0868 | 100   |
| 965733 atgggcagcc-    | STM0896 | 100 |         |        | STM0896 | 100   |
| 2587664 atgtcgcaaa-   | STM2477 | 100 | STM1578 | 64.545 | STM2477 | 100   |
| 1027342 atgatgactg-   | STM0948 | 100 |         |        | STM0948 | 100   |
| 2561202 atgagcacttt+  | STM2450 | 100 | STM2991 | 69.608 | STM2450 | 100   |
| 1012954 atgatgacga-   | STM0936 | 100 | STM0767 | 66     | STM0936 | 100   |
| 1052395 atgccgaatg+   | STM0969 | 100 | STM4345 | 66.038 | STM0969 | 100   |
| 1084675 atgattgaac+   | STM0994 | 100 | STM4507 | 65.385 | STM0994 | 100   |
| 1128996 gtggacagcc+   | STM1041 | 100 | STM2594 | 100    | STM1041 | 100   |
| 4302087 gtggcacaac-   | STM4093 | 100 | STM2588 | 68     | STM4093 | 100   |
| 3045712 atggatacga+   | STM2901 | 100 | STM1000 | 57.282 | STM2901 | 100   |
| 4585772 gtgcaaacct-   | STM4343 | 100 | STM0734 | 73     | STM4343 | 100   |
| 2533278 atggaacga-    | STM2420 | 100 | STM1487 | 80     | STM2420 | 99.66 |
| 991786 atggaccag+     | STM0918 | 100 | STM2594 | 80     | STM0918 | 100   |
| 2673748 atgaccacc+    | STM2533 | 100 | STM2691 | 64.762 | STM2533 | 100   |
| 2715203 ttggtcagccc-  | STM2569 | 100 | STM0399 | 58.416 | STM2569 | 100   |
| 2703610 atgaaaaca+    | STM2560 | 100 | STM0710 | 84     | STM2560 | 100   |
| 4594714 atgggcgacc-   | STM4349 | 100 | STM2701 | 70     | STM4349 | 100   |
| 2092761 atggaaaata-   | STM2009 | 100 | STM4063 | 63.551 | STM2009 | 100   |
| 2425631 atggacgtca-   | STM2316 | 100 | STM2318 | 70.297 | STM2316 | 92.01 |
| 2472662 atgactgact-   | STM2360 | 100 | STM3723 | 65.686 | STM2360 | 100   |
| 1282609 atgttttaatta+ | STM1198 | 100 | STM0682 | 60.784 | STM1198 | 100   |
| 2131455 atgaagcgttt+  | STM2056 | 100 | STM2469 | 62     | STM2056 | 100   |
| 3599486 gtgtctaaag-   | STM3445 | 100 | STM4146 | 100    | STM3445 | 100   |
| 1566321 gtggttgctga+  | STM1488 | 100 | STM0682 | 70     | STM1488 | 100   |

|                       |         |     |         |        |         |       |
|-----------------------|---------|-----|---------|--------|---------|-------|
| 349557 atgatggaac +   | STM0304 | 100 | STM0179 | 52.941 | STM0304 | 100   |
| 1518586 atgaaactct -  | STM1441 | 100 | STM3364 | 62.376 | STM1441 | 100   |
| 4634552 atgctgcccg +  | STM4397 | 100 | STM3453 | 68.317 | STM4397 | 100   |
| 135513 atgccagagc +   | STM0115 | 100 | STM3064 | 61.386 | STM0115 | 100   |
| 2035112 atgctgatatg - | STM1941 | 100 | STM1522 | 60.194 | STM1941 | 100   |
| 2086104 atgggcaagt +  | STM2006 | 100 | STM2760 | 71     | STM2006 | 100   |
| 4680187 atgaatatcg +  | STM4435 | 100 | STM4533 | 53.465 | STM4435 | 100   |
| 2420577 atggaattaal + | STM2313 | 100 | STM3627 | 61.538 | STM2313 | 91.34 |
| 2454102 atgattaagct - | STM2340 | 100 | STM1956 | 59     | STM2340 | 100   |
| 4707210 atgggtaaatl - | STM4464 | 100 |         |        | STM4464 | 100   |
| 4750626 atgaatattga - | STM4496 | 100 | STM1619 | 63     | STM4496 | 100   |
| 2471174 atgagtaaca -  | STM2359 | 100 | STM0205 | 63.889 | STM2359 | 100   |
| 1275794 atgcaaaagc +  | STM1190 | 100 | STM0097 | 63.462 | STM1190 | 100   |
| 1422484 atgcgttttgg + | STM1343 | 100 | STM3453 | 66     | STM1343 | 100   |
| 1174181 atgttgatctt - | STM1084 | 100 |         |        | STM1084 | 100   |
| 346076 atgaagttca +   | STM0301 | 100 | STM3638 | 65     | STM0301 | 100   |
| 274002 atgagctctga +  | STM0232 | 100 | STM0935 | 61.765 | STM0232 | 100   |
| 498147 atgagactca -   | STM0443 | 100 | STM0600 | 62.376 | STM0443 | 100   |
| 180807 atggctatcgc +  | STM0153 | 100 | STM4491 | 62.5   | STM0153 | 100   |
| 1397070 atggaacgc +   | STM1317 | 100 | STM4220 | 70     | STM1317 | 100   |
| 1442588 atgtctcaga -  | STM1360 | 100 | STM1361 | 65     | STM1360 | 100   |
| 2930491 gtgaaaatac +  | STM2782 | 100 | STM4196 | 61.261 | STM2782 | 100   |
| 1535446 atgactacaa -  | STM1460 | 100 | STM1117 | 61.111 | STM1460 | 100   |
| 1563954 gtgagtcgta -  | STM1486 | 100 | STM0328 | 65.385 | STM1486 | 100   |
| 4450528 atgggagata -  | STM4229 | 100 | STM3391 | 73     | STM4229 | 100   |
| 350612 atgaaaaact -   | STM0306 | 100 |         |        | STM0306 | 100   |
| 432688 atgtcggcgg +   | STM0377 | 100 | STM1799 | 61     | STM0377 | 100   |
| 464178 gtgttaaacc +   | STM0407 | 100 |         |        | STM0407 | 100   |
| 146321 atgattagcgt +  | STM0124 | 100 | STM3965 | 85.437 | STM0124 | 100   |
| 2476379 atggtctggat - | STM2363 | 100 | STM0797 | 60.396 | STM2363 | 100   |
| 2934435 atgctctctt -  | STM2785 | 100 | STM4292 | 71     | STM2785 | 100   |
| 1454179 atgtctcgtaa + | STM1370 | 100 | STM3478 | 63.208 | STM1370 | 100   |
| 3730136 atgagtcagc -  | STM3561 | 100 | STM3560 | 67     | STM3561 | 100   |
| 520312 atgctgagttt +  | STM0461 | 100 | STM0817 | 68     | STM0461 | 100   |
| 625593 gtgaaaaac +    | STM0568 | 100 | STM0150 | 79     | STM0568 | 100   |
| 2310589 atggcctcttc + | STM2210 | 100 | STM2211 | 97     | STM2210 | 100   |
| 4653171 atgacctcaa -  | STM4412 | 100 | STM1368 | 68.932 | STM4412 | 100   |
| 2785844 gtgacaccgc +  | STM2645 | 100 | STM3557 | 48.039 | STM2645 | 100   |
| 3829195 atgattgtaac - | STM3641 | 100 | STM4121 | 61.165 | STM3641 | 100   |
| 3442155 atggcagtgat + | STM3275 | 100 | STM4477 | 71     | STM3275 | 100   |
| 2400215 atgttggaatc - | STM2292 | 100 | STM3533 | 66     | STM2292 | 100   |
| 2680575 atggattactt - | STM2540 | 100 | STM4163 | 64.706 | STM2540 | 100   |
| 31209 atgcctccgc +    | STM0027 | 100 | STM0545 | 65.347 | STM0027 | 100   |
| 4656496 atgaaaacgtl - | STM4415 | 100 | STM1806 | 62.136 | STM4415 | 100   |
| 4803529 atgaaaaatg -  | STM4543 | 100 | STM1015 | 68     | STM4543 | 100   |
| 2748188 atgagcaaa -   | STM2598 | 100 | STM0915 | 91     | STM2598 | 100   |
| 4808925 atggcctacc -  | STM4550 | 100 |         |        | STM4550 | 100   |
| 3905113 atgctgggg -   | STM3709 | 100 |         |        | STM3709 | 100   |
| 3804215 atggcgattct - | STM3620 | 100 |         |        | STM3620 | 100   |
| 3437654 gtgcaagggtg - | STM3268 | 100 |         |        | STM3268 | 100   |
| 2388600 atgaaaacc -   | STM2282 | 100 | STM3553 | 71     | STM2282 | 100   |
| 2383685 atgaatcaga +  | STM2277 | 100 |         |        | STM2277 | 100   |

|                       |         |     |         |         |         |       |
|-----------------------|---------|-----|---------|---------|---------|-------|
| 3037972 atgaaaaca-    | STM2894 | 100 | STM1415 | 71      | STM2894 | 100   |
| 4292270 atgaccatac+   | STM4083 | 100 | STM3174 | 66.019  | STM4083 | 100   |
| 761998 atgagtaatc-    | STM0699 | 100 | STM2202 | 58.654  | STM0699 | 100   |
| 805769 atgagtagcg+    | STM0737 | 100 | STM2709 | 64.356  | STM0737 | 100   |
| 4214266 atgcaacgaç-   | STM4005 | 100 | STM1691 | 75      | STM4005 | 100   |
| 3620322 atgacctgct-   | STM3469 | 100 | STM0066 | 59      | STM3469 | 100   |
| 4208917 atggttcagat+  | STM3999 | 100 | STM4358 | 65      | STM3999 | 100   |
| 948036 atgatatcact+   | STM0876 | 100 | STM0918 | 62.376  | STM0876 | 100   |
| 3611740 atgattgtttct+ | STM3459 | 100 | STM0838 | 71.287  | STM3459 | 100   |
| 4504293 atgtcgcatac-  | STM4265 | 100 | STM0581 | 66      | STM4265 | 100   |
| 2723913 gtggaagggl-   | STM2579 | 100 |         | STM2579 | 100     |       |
| 1973856 atgttgccaa-   | STM1879 | 100 | STM1467 | 88      | STM1879 | 100   |
| 4388182 atgaaacgg-    | STM4172 | 100 | STM2389 | 61.765  | STM4172 | 100   |
| 4225702 atgaaatctc-   | STM4016 | 100 | STM0668 | 53.846  | STM4016 | 100   |
| 1503335 gtgcagaagt-   | STM1425 | 100 | STM0768 | 88      | STM1425 | 99.71 |
| 2550529 gtgcgagttc+   | STM2437 | 100 | STM0128 | 62      | STM2437 | 100   |
| 1025624 atggggggaç+   | STM0946 | 100 | STM1957 | 100     | STM0946 | 100   |
| 2805550 atgaatgcac-   | STM2661 | 100 |         | STM2661 | 100     |       |
| 61084 atgacagcat+     | STM0051 | 100 | STM0661 | 67      | STM0051 | 100   |
| 1100093 atgcgccttat-  | STM1007 | 100 | STM2634 | 100     | STM1007 | 100   |
| 1956371 atgttcaggtc+  | STM1859 | 100 | STM2150 | 62.162  | STM1859 | 100   |
| 3196209 atgcataaaa+   | STM3035 | 100 | PSLT002 | 77.228  | STM3035 | 100   |
| 4616643 atgctctttacç+ | STM4372 | 100 | STM1684 | 60.784  | STM4372 | 99.91 |
| 4759365 atgcacacct+   | STM4504 | 100 | STM0358 | 86      | STM4504 | 100   |
| 2127615 atgaatacttc+  | STM2051 | 100 | STM2463 | 74      | STM2051 | 100   |
| 4519839 atgacatccg+   | STM4280 | 100 | STM2251 | 68.932  | STM4280 | 100   |
| 1999821 atgtctcaccç+  | STM1905 | 100 | STM0937 | 63.725  | STM1905 | 100   |
| 4479874 gtgaaatatal+  | STM4258 | 100 | STM2734 | 58.252  | STM4258 | 100   |
| 9942 atgggcaac-       | STM0009 | 100 | STM3296 | 60      | STM0009 | 100   |
| 2846296 atgatgatggl-  | STM2696 | 100 |         | STM2696 | 100     |       |
| 48317 atgagcatgt+     | STM0040 | 100 | STM0876 | 58      | STM0040 | 100   |
| 4129234 atgacacaac+   | STM3919 | 100 | STM2079 | 59.406  | STM3919 | 100   |
| 4167692 atgtatcagg+   | STM3962 | 100 | STM0457 | 68.317  | STM3962 | 100   |
| 4145052 atgagtattct-  | STM3937 | 100 | STM0602 | 79.208  | STM3937 | 100   |
| 3232923 atgaccgtac-   | STM3070 | 100 | STM1290 | 62.376  | STM3070 | 99.9  |
| 1850948 atgagaaaa-    | STM1754 | 100 | STM1335 | 65      | STM1754 | 100   |
| 1889473 gtggcgaatg+   | STM1790 | 100 | STM1789 | 90      | STM1790 | 88.82 |
| 3178335 atgatttgaal-  | STM3017 | 100 | STM2642 | 66.355  | STM3017 | 100   |
| 3110461 atgaaaataç-   | STM2959 | 100 | STM3247 | 79      | STM2959 | 100   |
| 3137604 atgacaaaac+   | STM2985 | 100 | STM1374 | 58      | STM2985 | 100   |
| 4265208 atgaacacat-   | STM4053 | 100 | STM3170 | 82      | STM4053 | 100   |
| 3120206 ttgattacaca+  | STM2969 | 100 | STM3905 | 50      | STM2969 | 100   |
| 4241418 atgccactgg-   | STM4032 | 100 | STM3201 | 62.5    | STM4032 | 100   |
| 4172026 atgacaatatt+  | STM3965 | 100 | STM0124 | 86      | STM3965 | 100   |
| 4154689 atgacggatg+   | STM3949 | 100 | STM1763 | 65.049  | STM3949 | 100   |
| 4130420 gtgaaagtac+   | STM3920 | 100 | STM0309 | 66.337  | STM3920 | 100   |
| 4358659 atgaaagata+   | STM4138 | 100 | STM4292 | 60.952  | STM4138 | 100   |
| 3156083 atgttaagggl-  | STM2996 | 100 | STM1603 | 89      | STM2996 | 100   |
| 1836627 atgaatgctgt-  | STM1742 | 100 | STM0848 | 73      | STM1742 | 100   |
| 4291032 atgcgacatc-   | STM4081 | 100 | STM0989 | 62.264  | STM4081 | 100   |
| 540793 atgaccgcgç+    | STM0483 | 100 | STM1960 | 72      | STM0483 | 100   |
| 601388 atgaagcggt-    | STM0538 | 100 | STM4540 | 60      | STM0538 | 100   |



|                        |         |             |                |       |
|------------------------|---------|-------------|----------------|-------|
| 643813 atgaacaag:-     | STM0585 | 100 STM2777 | 83 STM0585     | 100   |
| 1061289 atgaaagcat+    | STM0976 | 100 STM0818 | 63.303 STM0976 | 100   |
| 347795 atgtcttatgc:+   | STM0303 | 100 STM0063 | 62.037 STM0303 | 100   |
| 1624681 atgctcagaaa+   | STM1547 | 100         | STM1547        | 100   |
| 1673646 atgcacttac:-   | STM1586 | 100 STM0189 | 50 STM1586     | 100   |
| 1715818 atggaaaaa:+    | STM1625 | 100 STM4591 | 61 STM1625     | 100   |
| 1756224 atggctatgta+   | STM1661 | 100 STM4381 | 62 STM1661     | 100   |
| 1742064 gtgccgcggt+    | STM1650 | 100         | STM1650        | 100   |
| 1791530 atgccgtttac-   | STM1698 | 100 STM2084 | 68.627 STM1698 | 100   |
| 570855 atgacaatta:+    | STM0509 | 100 STM1804 | 65.347 STM0509 | 100   |
| 1093541 atgaagcttg:-   | STM1001 | 100 STM0459 | 58.095 STM1001 | 100   |
| 1033347 atgcbgcgcb:-   | STM0956 | 100 STM0662 | 67.647 STM0956 | 100   |
| 683825 atgcbgcctgt-    | STM0620 | 100 STM0062 | 66 STM0620     | 100   |
| 670008 atgattaaac:-    | STM0607 | 100 STM2995 | 60.396 STM0607 | 100   |
| 1828531 atgaaaaaal-    | STM1732 | 100 STM0791 | 68.519 STM1732 | 100   |
| 1656785 atgctggatgt+   | STM1573 | 100 STM1573 | 72.549 STM1573 | 100   |
| 1709631 gtgaatataal-   | STM1621 | 100 STM3644 | 66 STM1621     | 100   |
| 1749661 gtgaccacttt-   | STM1655 | 100 STM0820 | 74 STM1655     | 100   |
| 1780330 atgtcaatga:-   | STM1685 | 100 STM3208 | 63.107 STM1685 | 100   |
| 3106461 atggcgcaat-    | STM2957 | 100 STM0882 | 63.366 STM2957 | 100   |
| 3164971 atgttatgtgca+  | STM3006 | 100 STM2119 | 71.569 STM3006 | 100   |
| 3197290 atgataatga:+   | STM3036 | 100 STM0858 | 61.321 STM3036 | 100   |
| 3260926 atgaatatgg:-   | STM3099 | 100 STM0143 | 69 STM3099     | 100   |
| 502963 atgcaagtttc+    | STM0447 | 100 STM2383 | 69 STM0447     | 100   |
| 3751251 atgtaccagg+    | STM3583 | 100 STM2563 | 61.765 STM3583 | 100   |
| 3867855 atgaacgtac+    | STM3679 | 100         | STM3679        | 100   |
| 3968557 atgcagcag:-    | STM3767 | 100 STM4447 | 64 STM3767     | 100   |
| 3340646 atgaaaaaal-    | STM3176 | 100 PSLT020 | 67 STM3176     | 100   |
| 3175689 gtgaaaacg:-    | STM3015 | 100 STM3014 | 47 STM3015     | 100   |
| 3241600 ttgatgttatttt- | STM3079 | 100 STM0232 | 48.113 STM3079 | 100   |
| 3283578 atgttgaatct-   | STM3123 | 100 STM2065 | 61.386 STM3123 | 100   |
| 3813236 atgtcacagg-    | STM3628 | 100 STM0851 | 74 STM3628     | 100   |
| 3853982 atgacattttc:+  | STM3665 | 100         | STM3665        | 96.75 |
| 3892651 atggctttaag+   | STM3697 | 100 STM3833 | 90 STM3697     | 100   |
| 3944473 atgaaattgal+   | STM3748 | 100 STM2811 | 63.107 STM3748 | 100   |
| 408271 atgatgaatal+    | STM0358 | 100         | STM0358        | 100   |
| 2999588 atgactatttg:-  | STM2853 | 100 STM0430 | 60 STM2853     | 100   |
| 3293106 atgggatattt:-  | STM3132 | 100 STM0945 | 58.824 STM3132 | 100   |
| 3001095 atgtgtacgar+   | STM2855 | 100 STM2683 | 76 STM2855     | 100   |
| 2279012 atgatgacat:+   | STM2182 | 100 STM4272 | 59.223 STM2182 | 100   |
| 2165292 atgtctttcttc-  | STM2084 | 100 STM2105 | 72 STM2084     | 100   |
| 2207467 atgcbgttatg:-  | STM2121 | 100 STM2253 | 60.748 STM2121 | 100   |
| 2348990 atgaaacgc:-    | STM2248 | 100 STM3813 | 100 STM2248    | 100   |
| 2320153 atgccgcgat+    | STM2218 | 100 STM1744 | 58.654 STM2218 | 100   |
| 2240225 atggaacaac:-   | STM2145 | 100 STM3935 | 62.037 STM2145 | 100   |
| 1940940 atgatgcgaa-    | STM1844 | 100 STM2970 | 70.297 STM1844 | 100   |
| 3585732 gtggcccgtta-   | STM3418 | 100 STM3877 | 58.416 STM3418 | 100   |
| 3761289 atggcttataa+   | STM3591 | 100 STM1927 | 68 STM3591     | 100   |
| 3510547 atggattgtgc:-  | STM3341 | 100 STM2325 | 65.347 STM3341 | 100   |
| 3788509 atgtctaaaa:+   | STM3612 | 100 STM3541 | 63.725 STM3612 | 100   |
| 3671706 atgccattagt+   | STM3512 | 100 STM4482 | 75 STM3512     | 100   |
| 4642511 atgttagaac:+   | STM4404 | 100 STM0309 | 62.617 STM4404 | 100   |

|         |                |         |        |         |        |         |       |
|---------|----------------|---------|--------|---------|--------|---------|-------|
| 3346463 | atgtctacgct -  | STM3182 | 100    | STM3182 | 64.762 | STM3182 | 100   |
| 2982410 | atgaaacctc +   | STM2837 | 100    | STM0193 | 65.686 | STM2837 | 100   |
| 2282634 | atgccgcaac +   | STM2186 | 100    | STM3331 | 86     | STM2186 | 100   |
| 3322981 | atggctgtcat +  | STM3162 | 100    | STM3226 | 77     | STM3162 | 100   |
| 1490280 | atgagcgtag +   | STM1408 | 100    | STM2838 | 66.667 | STM1408 | 100   |
| 800488  | atgaaactgc +   | STM0734 | 100    | STM4343 | 73     | STM0734 | 100   |
| 870241  | atgcgcaatc -   | STM0801 | 100    | STM2909 | 63     | STM0801 | 100   |
| 932017  | atgaacgata +   | STM0858 | 100    | STM3036 | 62.5   | STM0858 | 100   |
| 1259071 | gtggcgctgtt +  | STM1175 | 100    | STM4227 | 71.154 | STM1175 | 100   |
| 860083  | atgacaacgc -   | STM0793 | 100    | STM3218 | 78     | STM0793 | 100   |
| 907980  | ttgttgcgtaat + | STM0839 | 100    |         |        | STM0839 | 100   |
| 3501721 | atgacgaatc +   | STM3332 | 100    | STM3332 | 58     | STM3332 | 100   |
| 3954686 | atgatgagaa +   | STM3756 | 100    |         |        | STM3756 | 100   |
| 3352095 | atggaaaga +    | STM3188 | 100    | STM4376 | 70.588 | STM3188 | 100   |
| 1488757 | atgaaaattc +   | STM1404 | 100    | STM1639 | 88     | STM1404 | 100   |
| 900049  | atgaaaaaa +    | STM0833 | 100    | STM2947 | 60.194 | STM0833 | 100   |
| 4626951 | atgaccgtac +   | STM4384 | 100    | STM1320 | 89.32  | STM4384 | 100   |
| 4674353 | atgtcaatga -   | STM4430 | 100    | STM3793 | 63.462 | STM4430 | 100   |
| 446068  | atgaaaaaa -    | STM0394 | 100    | STM0257 | 67.327 | STM0394 | 100   |
| 4780601 | atgaacaata -   | STM4525 | 100    | STM0602 | 63.81  | STM4525 | 100   |
| 511062  | atgaaacac +    | STM0453 | 100    | STM3626 | 61.386 | STM0453 | 100   |
| 612544  | ttgtggcac -    | STM0551 | 100    | STM4355 | 70.297 | STM0551 | 100   |
| 613781  | gtgattcaca -   | STM0554 | 100    | STM0555 | 100    | STM0554 | 70    |
| 341459  | atgctcgctat +  | STM0298 | 100    | STM2764 | 77     | STM0298 | 100   |
| 386609  | atgtattacag +  | STM0342 | 100    | STM0345 | 62.745 | STM0342 | 100   |
| 389526  | atgagtcaga +   | STM0344 | 100    | STM0341 | 66     | STM0344 | 100   |
| 3117812 | gtggacgaac -   | STM2967 | 100    | STM2269 | 47     | STM2967 | 100   |
| 4562243 | ttgaatgcttc -  | STM4316 | 100    | STM2647 | 57.407 | STM4316 | 100   |
| 4280508 | atggcgctcg -   | STM4071 | 100    | STM0233 | 57.547 | STM4071 | 100   |
| 3983951 | atgagtaaaa -   | STM3783 | 100    | STM1315 | 59     | STM3783 | 100   |
| 3307450 | atgtgtattgg -  | STM3143 | 100    | STM2856 | 71.845 | STM3143 | 100   |
| 1610688 | atgtgtattgg -  | STM1535 | 100    | STM1555 | 72.549 | STM1535 | 100   |
| 1597931 | ttgaaaagca -   | STM1520 | 100    | STM3025 | 58.824 | STM1520 | 100   |
| 4007083 | atgaagatttc -  | STM3805 | 100    | STM3804 | 62.745 | STM3805 | 100   |
| 3938962 | atgtcaggcc +   | STM3744 | 100    | STM1216 | 71     | STM3744 | 100   |
| 3806423 | atgatgacca +   | STM3623 | 100    | STM2065 | 46     | STM3623 | 100   |
| 3995913 | atgcagaaa -    | STM3795 | 100    | STM2006 | 53.465 | STM3795 | 100   |
| 3679968 | atggggcaaa -   | STM3516 | 100    | STM3528 | 60.177 | STM3516 | 100   |
| 1449967 | ttgatctggaa +  | STM1366 | 100    | STM0599 | 72     | STM1366 | 100   |
| 4352814 | aggctgtag +    | STM4133 | 98.649 | STM0250 | 86.486 | STM4133 | 98.65 |
| 1961788 | ctgacgccgc -   | STM1865 | 100    | STM1999 | 66     | STM1865 | 100   |
| 4722122 | atggatttcga -  | STM4478 | 100    | STM4478 | 63.208 | STM4478 | 100   |
| 4209131 | atgttctatctt + | STM4000 | 100    |         |        | STM4000 | 100   |
| 4359829 | tattcgtcaca -  | STM4140 | 100    |         |        | STM4140 | 100   |
| 4119663 | ctgcccgttg +   | STM3911 | 100    | STM0757 | 65     | STM3911 | 100   |
| 3557775 | atgatacgtat +  | STM3387 | 100    |         |        | STM3387 | 100   |
| 3476501 | atgttgggctg -  | STM3308 | 100    | STM2136 | 59.223 | STM3308 | 100   |
| 2032915 | gtggtaaaaa -   | STM1939 | 100    | STM4088 | 88     | STM1939 | 100   |
| P47352  | atgttcgctttg - | PSLT054 | 100    | STM1997 | 73     | PSLT054 | 100   |
| P47774  | atgttactgctt - | PSLT055 | 100    | STM1998 | 66     | PSLT055 | 100   |
| P30915  | atgaatatgat -  | PSLT040 | 100    |         |        | PSLT040 | 100   |
| P53682  | atgtccggac +   | PSLT064 | 100    | STM1876 | 64     | PSLT064 | 100   |

|         |               |         |        |          |        |         |       |
|---------|---------------|---------|--------|----------|--------|---------|-------|
| P43402  | atgaaaaag:-   | PSLT051 | 100    | STM3508  | 76     | PSLT051 | 100   |
| P17677  | ttgaagtcatt:+ | PSLT023 | 100    | PSLT024  | 100    | PSLT024 | 94.5  |
| P52622  | atgcagtattc+  | PSLT062 | 100    | STM2167  | 61.765 | PSLT062 | 100   |
| P01845  | gtgtctacccc+  | PSLT004 | 100    | STM1811  | 47     | PSLT004 | 100   |
| R20925  | +             | STM1560 | 60.952 | STM2432  | 51     | STM1560 | 15.77 |
|         |               | STM2267 | 100    | STM1572  | 86     | STM2267 | 100   |
|         |               | STM2351 | 100    | STM1951  | 70     | STM2351 | 100   |
|         |               | STM2355 | 100    | STM2354  | 77     | STM2355 | 100   |
|         |               | STM2473 | 100    | STM0007  | 71     | STM2473 | 100   |
| 2591576 | atgaatcgttt-  | STM2479 | 100    | STM3331  | 71     | STM2479 | 100   |
| 2622648 | ttgatctctgcc- | STM2509 | 100    | STM0555  | 72     | STM2509 | 100   |
|         |               | STM0175 | 66     | STM3638  | 65     | STM0546 | 22.14 |
|         |               | STM3680 | 30     |          |        | STM3680 | 11.63 |
|         |               | STM0541 | 100    |          |        | STM0541 | 99.5  |
|         |               | STM0105 | 62.037 |          |        | STM0105 | 24.32 |
|         |               | STM3787 | 61.538 |          |        | STM3787 | 7.08  |
|         |               | STM0373 | 100    | STM1787  | 64.22  | STM0373 | 47.16 |
|         |               | STM2697 | 57.843 | STM3601  | 57.282 | STM3601 | 31.84 |
|         |               | STM3174 | 63.107 |          |        | STM3174 | 13.63 |
|         |               | STM3921 | 50     | STM3577  | 36     | STM3921 | 6.83  |
|         |               | STM0197 | 83     | STM3027  | 67.647 | STM0197 | 57.59 |
|         |               | STM1391 | 60.577 |          |        | STM1391 | 28.43 |
|         |               | STM3020 | 55     | STM1365  | 49.038 | STM3020 | 26.58 |
|         |               | STM3467 | 62.376 | STM0118  | 58     | STM3467 | 16.89 |
|         |               | STM0447 | 61.468 | STM0175  | 59.048 | STM0175 | 35.54 |
|         |               | STM4421 | 61.165 | STM1026  | 50.962 | STM4421 | 6.36  |
|         |               | STM0371 | 54.902 | STM0157  | 52.427 | STM0371 | 8.05  |
|         |               | STM0907 | 100    | STM1869A | 99     | STM0907 | 97.1  |
|         |               | STM3191 | 61.321 |          |        | STM3191 | 10.73 |
|         |               | STM1848 | 61.321 | STM3822  | 60     | STM3822 | 15.17 |
| 66637   | atgaccattgc-  | STM0055 | 100    | STM3352  | 100    | STM0055 | 95    |
|         |               | STM2730 | 90     | STM3484  | 66     | STM2730 | 72.22 |
|         |               | STM1832 | 59.804 | STM2594  | 58     | STM2574 | 25.7  |
|         |               | STM4185 | 100    | STM0194  | 88     | STM4185 | 95.65 |
|         |               | STM3920 | 60.784 | STM3499  | 59     | STM3920 | 19.51 |
|         |               | STM1828 | 47     | STM2219  | 27     | STM1828 | 22.07 |
|         |               | STM3674 | 65.714 | STM1727  | 60.185 | STM2443 | 35.31 |
|         |               | STM4514 | 100    | STM2807  | 62.745 | STM4514 | 91.08 |
|         |               | STM0625 | 63.107 | STM4200  | 58.824 | STM4200 | 40.67 |
|         |               | STM3000 | 59.434 | STM1229  | 58.095 | STM3000 | 23.97 |
|         |               | STM2730 | 94     | STM3484  | 73     | STM2730 | 80.5  |
|         |               | STM3787 | 60.396 | STM1320  | 60.194 | STM3787 | 17.89 |
|         |               | STM0745 | 50     |          |        | STM0745 | 35.34 |
|         |               | STM0625 | 59.804 |          |        | STM0625 | 6.48  |
| 4020818 | atgattaagc:-  | STM3821 | 100    | STM3624  | 67.961 | STM3821 | 100   |
| 4049577 | atgagccata+   | STM3843 | 100    | STM2580  | 64.762 | STM3843 | 100   |
| 4080167 | atggcttcag:-  | STM3871 | 100    |          |        | STM3871 | 100   |
| 3911616 | atgggcagc:-   | STM3715 | 100    | STM3715  | 67.308 | STM3715 | 100   |
| 3479758 | atgggtcagtr-  | STM3313 | 100    | STM0662  | 76     | STM3313 | 100   |

|         |               |         |     |         |        |         |       |
|---------|---------------|---------|-----|---------|--------|---------|-------|
| 3518712 | gtgattctgttc- | STM3350 | 100 | STM0769 | 72     | STM3350 | 100   |
| 3511191 | atggctgtcgr-  | STM3342 | 100 | STM2099 | 62.857 | STM3342 | 100   |
| 3544559 | atgttgaaaa:-  | STM3374 | 100 | STM0659 | 63.462 | STM3374 | 100   |
| 699612  | atgaagacc:-   | STM0637 | 100 | STM0863 | 80     | STM0637 | 100   |
| 724212  | atggataatgr-  | STM0659 | 100 | STM0012 | 65.385 | STM0659 | 100   |
| 756846  | atgactgaca-   | STM0693 | 100 | STM4534 | 87     | STM0693 | 100   |
| 4025359 | atgtcacatc:+  | STM3824 | 100 | STM3502 | 71     | STM3824 | 100   |
| 1612045 | atgttattgata- | STM1537 | 100 | STM1788 | 77.228 | STM1537 | 100   |
| 4031783 | atgaaaataa-   | STM3828 | 100 | STM2291 | 66     | STM3828 | 65.21 |
| 4056192 | atgaagaaal+   | STM3848 | 100 | STM3485 | 64.762 | STM3848 | 100   |
| 4091462 | atgagcactg+   | STM3880 | 100 |         |        | STM3880 | 100   |
| 1411310 | atgcttataatt- | STM1332 | 100 |         |        | STM1332 | 100   |
| 841597  | atgagagtatt-  | STM0776 | 100 | STM3110 | 58.824 | STM0776 | 99.9  |
| 2109095 | atgaaagatg-   | STM2030 | 100 | STM2030 | 63.366 | STM2030 | 100   |
| 3910706 | atgattaaaa:-  | STM3714 | 100 |         |        | STM3714 | 100   |
| 97848   | atgagtaata:+  | STM0084 | 100 |         |        | STM0084 | 100   |
| 162454  | atgtctgacgt-  | STM0138 | 100 |         |        | STM0138 | 100   |
| 202072  | atgaaagac:-   | STM0171 | 100 |         |        | STM0171 | 100   |
| 247704  | atgtatgaca:-  | STM0211 | 100 | STM4049 | 49     | STM0211 | 100   |
| 3576804 | atggcccgtta-  | STM3405 | 100 | STM0651 | 60     | STM3405 | 100   |
| 3612437 | atgtcgaaga-   | STM3461 | 100 | STM1751 | 62.136 | STM3461 | 100   |
| 1295758 | ttgactacacc+  | STM1211 | 100 | STM3588 | 50     | STM1211 | 100   |
| 1337978 | atggcacattt-  | STM1253 | 100 | STM1639 | 65     | STM1253 | 100   |
| 1364935 | gtgaccaa:-    | STM1286 | 100 | STM0433 | 63.366 | STM1286 | 100   |
| 2201059 | atgacagaa:-   | STM2116 | 100 | STM1491 | 89     | STM2116 | 98.36 |
| 1297685 | atgaaaaac:+   | STM1214 | 100 | STM0823 | 61.905 | STM1214 | 100   |
| 1345643 | atgcaacaac:+  | STM1261 | 100 |         |        | STM1261 | 100   |
| 1367375 | atgaaatcag+   | STM1288 | 100 | STM3165 | 62.857 | STM1288 | 100   |
| 2204905 | atggaatgga+   | STM2119 | 100 | STM1828 | 89     | STM2119 | 100   |
| 4857408 | atgctgtgtaa+  | STM4600 | 100 | STM2545 | 67.327 | STM4600 | 100   |
| 2892114 | atgaacaaa:+   | STM2753 | 100 | STM2277 | 56.436 | STM2753 | 100   |
| 2193724 | atgtcaaaag-   | STM2109 | 100 | STM4275 | 78     | STM2109 | 100   |
| 2231045 | atgtttaaacc+  | STM2136 | 100 | STM0185 | 59.804 | STM2136 | 99.78 |
| 316639  | gtgagcctga+   | STM0275 | 100 | STM4314 | 61.905 | STM0275 | 100   |
| 340952  | atgctgtaaag+  | STM0297 | 100 | STM2765 | 84     | STM0297 | 100   |
| 374194  | atgtctgctaa+  | STM0329 | 100 | STM0111 | 74     | STM0329 | 100   |
| 1151992 | atgaattctct:+ | STM1061 | 100 |         |        | STM1061 | 100   |
| 4345380 | atgccacattc-  | STM4126 | 100 | STM4534 | 92     | STM4126 | 100   |
| 3058808 | atgccgcgttt-  | STM2915 | 100 | STM0518 | 62.376 | STM2915 | 100   |
| 2497311 | atgaaaaag:+   | STM2386 | 100 |         |        | STM2386 | 100   |
| 2537696 | atgaactattc-  | STM2424 | 100 | STM0256 | 66     | STM2424 | 100   |
| 993587  | atgctgggac:+  | STM0921 | 100 | STM2592 | 77     | STM0921 | 100   |
| 2660501 | atggctattga-  | STM2526 | 100 | STM2851 | 62.376 | STM2526 | 100   |
| 987115  | atgaacaaa:+   | STM0915 | 100 | STM2598 | 91     | STM0915 | 100   |
| 2624382 | atgacggaa:-   | STM2510 | 100 | STM4290 | 62     | STM2510 | 100   |
| 2683425 | atgagactga-   | STM2544 | 100 | STM3619 | 80     | STM2544 | 100   |
| 2733915 | atgacgtttaa-  | STM1868 | 100 | STM2586 | 100    | STM2586 | 100   |
| 4270444 | atgaataaaa-   | STM4059 | 100 | STM3824 | 69     | STM4059 | 100   |
| 4435391 | atggcagcta-   | STM4213 | 100 | STM3086 | 64.151 | STM4213 | 100   |
| 3054487 | atgacgtatc:-  | STM2911 | 100 | STM2815 | 65     | STM2911 | 100   |
| 3086703 | gtgtcgatata-  | STM2944 | 100 | STM0615 | 57     | STM2944 | 100   |
| 2553727 | atgagcattg:-  | STM2441 | 100 | STM1491 | 88     | STM2441 | 100   |

|                         |         |             |                |       |
|-------------------------|---------|-------------|----------------|-------|
| 2601973 atgcgctggc -    | STM2486 | 100 STM1576 | 58.879 STM2486 | 99.31 |
| 1055020 atgccagttac +   | STM0972 | 100 STM2945 | 69 STM0972     | 100   |
| 1096753 atgttagagc: +   | STM1003 | 100 STM0006 | 66 STM1003     | 100   |
| 1078209 atgcaggatc +    | STM0991 | 100 STM2166 | 62 STM0991     | 100   |
| 2043036 atgccactac -    | STM1953 | 100 STM3965 | 62.745 STM1953 | 100   |
| 2154651 gtgatgaacg +    | STM2075 | 100 STM0266 | 59.406 STM2075 | 100   |
| 2445820 gtgaacggtg -    | STM2333 | 100 STM3356 | 62.745 STM2333 | 100   |
| 2130648 atgtctcagg: +   | STM2054 | 100 STM2455 | 65.049 STM2054 | 100   |
| 1351233 gtgttcgagg: +   | STM1270 | 100 STM3959 | 62.376 STM1270 | 91.42 |
| 1222921 gtgatagcaa +    | STM1132 | 100 STM3338 | 73 STM1132     | 100   |
| 1407069 atgaagctttt: +  | STM1327 | 100 STM0201 | 63 STM1327     | 100   |
| 423574 atgtcttttagc +   | STM0371 | 100 STM4275 | 73 STM0371     | 100   |
| 1399366 atgtcgcata: -   | STM1318 | 100         | STM1318        | 100   |
| 4598383 atgttatggtc: -  | STM4355 | 100 STM3204 | 86.139 STM4355 | 100   |
|                         | STM1995 | 100 STM1473 | 88 STM1995     | 100   |
| 1475988 atgtcgtattct -  | STM1390 | 100 STM2160 | 74 STM1390     | 100   |
| 4621601 atggagcgtc -    | STM4378 | 100 STM3279 | 57.843 STM4378 | 100   |
| 4660858 atgtccacatc -   | STM4418 | 100 STM4419 | 69.307 STM4418 | 100   |
| 2381044 atgaacactg +    | STM2276 | 100         | STM2276        | 100   |
| 4743262 atgaaaatag -    | STM4494 | 100 STM4581 | 91 STM4494     | 100   |
| 4775828 atggcttacc: +   | STM4519 | 100 STM2791 | 72 STM4519     | 100   |
| 2406096 atgtttgacgc +   | STM2298 | 100 STM3346 | 63.81 STM2298  | 100   |
| 2443902 atgaagcag: +    | STM2332 | 100 STM0491 | 63.725 STM2332 | 100   |
| 4796637 atggtagagg +    | STM4537 | 100 STM4037 | 64.078 STM4537 | 100   |
| 1350398 atgattcgca +    | STM1269 | 100 STM1269 | 63.107 STM1269 | 100   |
| 236264 atggctaaaa +     | STM0200 | 100 STM4301 | 87 STM0200     | 100   |
| 418864 atgtctttacat +   | STM0368 | 100 STM4184 | 77.982 STM0368 | 100   |
| 2789073 atgaacacc: +    | STM2649 | 100 STM3915 | 64.706 STM2649 | 100   |
| 442536 atgagtcggt: +    | STM0390 | 100 STM2545 | 65.421 STM0390 | 100   |
| 4459140 atggccaata +    | STM4236 | 100         | STM4236        | 100   |
| 2459570 atgaaactga -    | STM2347 | 100 STM2732 | 63.725 STM2347 | 100   |
| 2405110 atggctgaag +    | STM2297 | 100 STM3925 | 64.356 STM2297 | 100   |
| 4446582 atgatgccatt +   | STM4226 | 100 STM4268 | 54.206 STM4226 | 100   |
| 1458990 atgaaacgtg +    | STM1375 | 100 STM1215 | 70 STM1375     | 100   |
| 1669221 atgacctctttt -  | STM1582 | 100 STM0361 | 61 STM1582     | 100   |
| 2364195 atgatgaaa: -    | STM2265 | 100 STM1659 | 62 STM2265     | 100   |
| 3985182 atgaaaacat -    | STM3785 | 100 STM1239 | 58.824 STM3785 | 100   |
| 2722442 atggcgattct -   | STM2577 | 100 STM1048 | 56.881 STM2577 | 100   |
| 194995 ttgaaaaagc -     | STM0165 | 100         | STM0165        | 100   |
| 2135872 atggattacg: -   | STM2061 | 100 STM0547 | 60.396 STM2061 | 100   |
| 169917 atgttgccag: +    | STM0146 | 100 STM0931 | 51.485 STM0146 | 100   |
| 183833 atgaaaaag: -     | STM0156 | 100 STM0611 | 60.577 STM0156 | 100   |
| 1414130 atgcctgttatt +  | STM1333 | 100 STM4024 | 65.741 STM1333 | 100   |
| 479316 atgaagtttat: +   | STM0425 | 100 STM3288 | 55 STM0425     | 100   |
| 1553926 atggaaaaa: -    | STM1477 | 100 STM2558 | 63.107 STM1477 | 100   |
| 555882 atgacacc: -      | STM0495 | 100 STM4549 | 65.385 STM0495 | 100   |
| 556878 atggagctatt -    | STM0496 | 100 STM0702 | 59.259 STM0496 | 100   |
| 655946 gtgagactcc -     | STM0594 | 100 STM0979 | 67.327 STM0594 | 100   |
| 4719868 atggaaaag: -    | STM4475 | 100 STM0977 | 89 STM4475     | 100   |
| 4856086 atgcagacc: -    | STM4598 | 100 STM3502 | 70 STM4598     | 100   |
| 3382367 atgtttttgcat: - | STM3216 | 100 STM1919 | 84 STM3216     | 100   |
| 3936875 atgaatccaa +    | STM3743 | 100 STM4369 | 66 STM3743     | 100   |

|                        |         |             |                |       |
|------------------------|---------|-------------|----------------|-------|
| 1345123 atggagtattt:-  | STM1260 | 100 STM1663 | 64.706 STM1260 | 100   |
| 2534803 atgggtattac-   | STM2421 | 100 STM3113 | 81 STM2421     | 100   |
| 2917492 atgcgtattctç+  | STM2773 | 100 STM2113 | 54.286 STM2773 | 100   |
| 2752323 atgtcatttacc-  | STM2604 | 100 STM2514 | 52.427 STM2604 | 100   |
| 1109538 atgagaattg:+   | STM1019 | 100 STM2621 | 100 STM1019    | 100   |
| 2755402 gtgaagcgcç:-   | STM2606 | 100 STM2750 | 58 STM2606     | 100   |
| 2782772 atgtctcagtc-   | STM2642 | 100 STM1775 | 65.421 STM2642 | 100   |
| 3356297 atgcgtgatg:+   | STM3192 | 100 STM4098 | 76 STM3192     | 100   |
| 3756763 atggacaaa:-    | STM3587 | 100 STM1535 | 64.423 STM3587 | 100   |
| 3645230 gtgaacgcgc:-   | STM3490 | 100 STM0952 | 71.698 STM3490 | 100   |
| 2563860 atggacgag:+    | STM2453 | 100 STM2995 | 64 STM2453     | 100   |
| 3032603 atgtcctcgac:-  | STM2887 | 100 STM0965 | 61.905 STM2887 | 100   |
| 2575502 atggaagcat-    | STM2465 | 100 STM2038 | 72 STM2465     | 100   |
| 4267918 ttgcacgtctg+   | STM4056 | 100         | STM4056        | 100   |
| 726493 atggcactgc-     | STM0661 | 100 STM0051 | 67 STM0661     | 100   |
| 774667 atggaacact+     | STM0708 | 100 STM2251 | 60 STM0708     | 100   |
| 3044832 atgaaaaaal+    | STM2900 | 100         | STM2900        | 100   |
| 613302 atgtcgcgtat-    | STM0552 | 100 STM4526 | 56.436 STM0552 | 100   |
| 849017 atgactgcac-     | STM0784 | 100 STM3831 | 67 STM0784     | 95.12 |
| 836272 atgcgcgggt+     | STM0771 | 100 STM0878 | 72 STM0771     | 100   |
| 1162017 atgaaaaag:-    | STM1070 | 100 STM3645 | 62 STM1070     | 100   |
| 1261019 atgtcttttctc+  | STM1177 | 100 STM2499 | 64.486 STM1177 | 100   |
| 1874413 atgaagcctt:-   | STM1776 | 100 STM3041 | 79 STM1776     | 100   |
| 2024721 atgagtcgitt:-  | STM1928 | 100 STM4188 | 63.107 STM1928 | 100   |
| 2081870 atgggcgcçç:-   | STM1999 | 100 STM1865 | 66 STM1999     | 100   |
| 4079006 gtgaatcttaa-   | STM3869 | 100 STM1185 | 62.857 STM3869 | 100   |
| 1512857 atgcgtttattg-  | STM1435 | 100 STM2127 | 69 STM1435     | 100   |
| 2042029 atgcaagaa:-    | STM1952 | 100 STM0445 | 66.981 STM1952 | 100   |
| 1768713 atgacgctatt+   | STM1675 | 100 STM0598 | 74 STM1675     | 100   |
| 2778746 atgaagcaar-    | STM2638 | 100         | STM2638        | 100   |
| 797237 atggctgatar-    | STM0730 | 100 STM0369 | 61.905 STM0730 | 100   |
| 1318689 atgaataaatl-   | STM1230 | 100 STM3501 | 65 STM1230     | 100   |
| 4392450 atgaaagtatl-   | STM4175 | 100 STM2222 | 70 STM4175     | 100   |
| 3456288 atgacagatg-    | STM3286 | 100 STM1776 | 62.857 STM3286 | 100   |
| 2120307 atggaaatta:+   | STM2041 | 100 STM2247 | 53.465 STM2041 | 100   |
| 4696752 atgactattcc-   | STM4453 | 100 STM1560 | 73 STM4453     | 99.64 |
| 1481895 atggtagtaa:+   | STM1394 | 100         | STM1394        | 100   |
| 1279210 atgacgcaat+    | STM1194 | 100 STM3767 | 62.136 STM1194 | 100   |
| 1800141 atgtttatgacç+  | STM1705 | 100 STM0575 | 62.136 STM1705 | 100   |
| 3523763 atgagcaaaa:-   | STM3355 | 100 STM0880 | 90 STM3355     | 100   |
| 3916745 atggttgagct-   | STM3721 | 100         | STM3721        | 100   |
| 1104141 atgagtggaar-   | STM1009 | 100 STM2632 | 100 STM1009    | 100   |
| 1231588 atgaaaaaac:+   | STM1143 | 100 STM2410 | 63 STM1143     | 100   |
| 4185863 atgacaacct+    | STM3979 | 100 STM2427 | 61 STM3979     | 100   |
| 2815220 atgagcaacç:-   | STM2673 | 100 STM4220 | 53 STM2673     | 100   |
| 4134793 atgattcctttt:+ | STM3925 | 100 STM3273 | 65 STM3925     | 100   |
| 4115985 gtgggatcttc+   | STM3906 | 100 STM1793 | 52 STM3906     | 100   |
| 1264453 gtgtttaaagc+   | STM1181 | 100 STM1349 | 61.321 STM1181 | 100   |
| 3628841 gtggaccattt+   | STM3477 | 100 STM2029 | 60 STM3477     | 100   |
| 3159693 atgaccagta-    | STM3002 | 100 STM2571 | 63.208 STM3002 | 100   |
| 3376251 atggctggac+    | STM3210 | 100 STM2388 | 67.327 STM3210 | 100   |
| 481020 atgtcactcat-    | STM0427 | 100 STM2253 | 72 STM0427     | 100   |

|                        |         |             |                |       |
|------------------------|---------|-------------|----------------|-------|
| 4244745 atggcttatca -  | STM4036 | 100 STM1569 | 84 STM4036     | 100   |
| 895464 gtgattgaattl -  | STM0828 | 100 STM0891 | 80 STM0828     | 100   |
| 4189300 atggaacagc -   | STM3982 | 100 STM3019 | 70 STM3982     | 100   |
| 2011434 gtggcagaaç -   | STM1914 | 100 STM0286 | 68.627 STM1914 | 99.73 |
| 1087669 atggacaaat +   | STM0996 | 100 STM3628 | 89.109 STM0996 | 100   |
| 3864660 atggttagagc +  | STM3677 | 100 STM0101 | 83 STM3677     | 99.29 |
| 211024 atggttatgcg +   | STM0179 | 100         | STM0179        | 99.76 |
| 671012 atgccttaatt +   | STM0608 | 100 STM0402 | 70 STM0608     | 100   |
| 3171652 atggcgaccç +   | STM3011 | 100 STM2191 | 78.218 STM3011 | 100   |
| 4250138 atgaaaaagç -   | STM4039 | 100 STM4040 | 68 STM4039     | 100   |
| 1988975 atgattgaattl + | STM1893 | 100 STM0669 | 63.462 STM1893 | 100   |
| 1640720 atgatcccaa -   | STM1559 | 100 STM1843 | 93 STM1559     | 100   |
| 1665969 atgaaaatac +   | STM1578 | 100 STM1763 | 89 STM1578     | 100   |
| 1667341 atgatacagtl +  | STM1580 | 100 STM1761 | 78 STM1580     | 100   |
| 381030 atgcttttagtl -  | STM0337 | 100 PSLT100 | 61.165 STM0337 | 100   |
| 1834328 atgacaacct +   | STM1739 | 100 STM0812 | 90 STM1739     | 100   |
| 1899712 atgtctctgttl + | STM1800 | 100 STM4358 | 65 STM1800     | 100   |
| 1944570 atgacaggaa -   | STM1847 | 100 STM3905 | 62.037 STM1847 | 100   |
| 1987416 gtgatagaatl -  | STM1891 | 100 STM3750 | 62 STM1891     | 100   |
| 1757803 atgttcactga +  | STM1663 | 100 STM1260 | 64.706 STM1663 | 100   |
| 538865 atggaacgtc -    | STM0479 | 100 STM3508 | 81 STM0479     | 100   |
| 677304 atggaaaaai +    | STM0613 | 100 STM4307 | 75 STM0613     | 100   |
| 632059 atgaataaaç +    | STM0571 | 100 STM3773 | 73 STM0571     | 100   |
| 652565 atgttctttctc -  | STM0591 | 100 STM0517 | 65.138 STM0591 | 99.7  |
| 386337 atgatggatgl +   | STM0341 | 100 STM0344 | 66 STM0341     | 100   |
| 687642 atgtttggcaa -   | STM0624 | 100 STM0058 | 79.208 STM0624 | 100   |
| 1628827 atgaacctag +   | STM1552 | 100         | STM1552        | 100   |
| 1893085 atgttgattal +  | STM1793 | 100 STM0741 | 83 STM1793     | 100   |
| 1720867 atgaatgatgl -  | STM1630 | 100 STM2478 | 73.077 STM1630 | 100   |
| 1981142 atggcggttaa -  | STM1886 | 100 STM4460 | 62.385 STM1886 | 100   |
| 2028560 atgaaaattgl -  | STM1933 | 100 STM2589 | 64.706 STM1933 | 100   |
| 3332580 atgaaaaaac +   | STM3169 | 100 STM4054 | 92 STM3169     | 100   |
| 2843875 atggacgatc +   | STM2692 | 100 STM2851 | 48 STM2692     | 97.73 |
| 3231855 atgtctgtaatl - | STM3069 | 100         | STM3069        | 100   |
| 466391 atgaccagac +    | STM0410 | 100 STM4203 | 72.816 STM0410 | 100   |
| 3315967 atgctgttctç -  | STM3152 | 100 STM4533 | 88 STM3152     | 100   |
| 2978871 atgatcgaaa +   | STM2832 | 100 STM2750 | 64 STM2832     | 100   |
| 305720 atggacatgl -    | STM0266 | 100 STM3674 | 60.952 STM0266 | 100   |
| 4786225 atgagcatgg +   | STM4529 | 100 STM2197 | 57.843 STM4529 | 100   |
| 3131938 atgctaaaaa +   | STM2978 | 100 STM2356 | 66.99 STM2978  | 100   |
| 2849100 atgagtgaca -   | STM2697 | 100 STM0256 | 70 STM2697     | 100   |
| 440065 atggagaagç -    | STM0386 | 100 STM1170 | 55.769 STM0386 | 100   |
| 494244 atgatgttaatl -  | STM0439 | 100         | STM0439        | 100   |
| 3162698 gtgattgatga -  | STM3004 | 100 STM4328 | 61.905 STM3004 | 100   |
| 4687602 atgtttgattal + | STM4445 | 100 STM4413 | 73 STM4445     | 100   |
| 1582126 atgctaaaga +   | STM1504 | 100 STM3242 | 62.376 STM1504 | 100   |
| 4117213 gtggatttacg -  | STM3908 | 100 STM4125 | 72 STM3908     | 100   |
| 2983368 atgctggagc +   | STM2838 | 100 STM3315 | 75.49 STM2838  | 95.96 |
| 3710241 atgcgacttat +  | STM3540 | 100 STM3541 | 84 STM3540     | 100   |
| 393930 gtgagaaccç -    | STM0350 | 100 STM3983 | 64.078 STM0350 | 100   |
| 2974737 atgagtgaac -   | STM2828 | 100 STM4188 | 87 STM2828     | 92.78 |
| 2289137 atgatcacca -   | STM2191 | 100 STM3011 | 78.218 STM2191 | 100   |

|                        |         |             |                |       |
|------------------------|---------|-------------|----------------|-------|
| 2328481 atgagtctgg:-   | STM2226 | 100 STM0834 | 56 STM2226     | 100   |
| 2234912 atggctaactt +  | STM2140 | 100 STM2466 | 90.099 STM2140 | 100   |
| 2270265 atgaatcgta:-   | STM2172 | 100 STM0350 | 64.151 STM2172 | 100   |
| 2305269 atgaaaacg:-    | STM2204 | 100 STM3858 | 80 STM2204     | 100   |
| 2237542 atgaaaacg:+    | STM2142 | 100 STM2421 | 66 STM2142     | 100   |
| 2272964 atgactcacg -   | STM2175 | 100 STM3275 | 61.682 STM2175 | 100   |
| 3858681 atgaagcgg:+    | STM3671 | 100 STM1373 | 65.347 STM3671 | 100   |
| 1005690 atgcagtttc:+   | STM0930 | 100 STM3593 | 70.192 STM0930 | 100   |
| 4614324 atgagcgaat +   | STM4369 | 100 STM2315 | 66.346 STM4369 | 100   |
| 3603872 atgctgtatgc -  | STM3451 | 100 STM1255 | 66.981 STM3451 | 100   |
| 4606235 ttgtttgaccgt + | STM4362 | 100 STM0994 | 59.615 STM4362 | 100   |
| 3446031 atggcaacac -   | STM3279 | 100 STM1937 | 64 STM3279     | 100   |
| 4841356 atgaccagc +    | STM4583 | 100 STM2894 | 54.902 STM4583 | 100   |
| 2969556 atgtacgcac -   | STM2820 | 100 STM2334 | 61 STM2820     | 100   |
| 2313244 atgacgatga +   | STM2213 | 100 STM3089 | 59.804 STM2213 | 100   |
| 3271238 atgatgaaa +    | STM3112 | 100 STM1799 | 62 STM3112     | 100   |
| 3222898 atgattcggc +   | STM3061 | 100 STM1901 | 47.059 STM3061 | 91.96 |
| 821276 atgagcgtaa +    | STM0756 | 100 STM3691 | 62.037 STM0756 | 100   |
| 889302 atggcattga +    | STM0821 | 100 STM2648 | 61 STM0821     | 100   |
| 3203682 gtgaaacaa -    | STM3042 | 100 STM4119 | 62.136 STM3042 | 100   |
| 3436919 atgaaggcat +   | STM3267 | 100 STM2129 | 59.813 STM3267 | 100   |
| 873341 atgcacgaa +     | STM0806 | 100 STM2120 | 63.81 STM0806  | 100   |
| 924854 atgagtaatgi -   | STM0852 | 100 STM2994 | 78 STM0852     | 100   |
| 1470432 atgacgcattc -  | STM1384 | 100 STM2316 | 65.049 STM1384 | 100   |
| 3397800 gtgagcagc +    | STM3231 | 100 STM3827 | 61.386 STM3231 | 100   |
| 2914750 atggcacaa -    | STM1959 | 100 STM2771 | 100 STM2771    | 100   |
| 3235034 atgcatccgtt +  | STM3073 | 100 STM3200 | 63.107 STM3073 | 100   |
| 913779 atgaccac -      | STM0843 | 100 STM2719 | 66.667 STM0843 | 100   |
| 433034 atggctgattc -   | STM0378 | 100 STM4472 | 60.952 STM0378 | 100   |
| 501318 atgatgatac +    | STM0446 | 100 STM3308 | 60.784 STM0446 | 100   |
| 4735478 atggatgaca +   | STM4489 | 100 STM1466 | 60 STM4489     | 100   |
| 2844645 atgatgaact -   | STM2694 | 100         | STM2694        | 100   |
| 4795356 atgaagaga +    | STM4535 | 100 STM0798 | 61.386 STM4535 | 100   |
| 4580371 atgggtgcagc +  | STM4335 | 100 STM0593 | 62 STM4335     | 100   |
| 4566331 atgcagattg +   | STM4320 | 100 STM4128 | 67.647 STM4320 | 100   |
| 4569408 atgcttgatgt -  | STM4324 | 100 STM2170 | 64.151 STM4324 | 100   |
| 4582838 atgattaatcc -  | STM4340 | 100 STM2316 | 64.486 STM4340 | 100   |
| 3043932 atgtcattttct - | STM2899 | 100 STM2392 | 55.882 STM2899 | 100   |
| 1877495 atgatgacc +    | STM1779 | 100 STM4126 | 62 STM1779     | 100   |
| 2857418 atgacgctgt -   | STM2709 | 100 STM0737 | 64.486 STM2709 | 100   |
| 2191663 ttgagaatca -   | STM2107 | 100 STM1769 | 64.22 STM2107  | 100   |
| 3779462 atgccgcac +    | STM3605 | 100         | STM3605        | 100   |
| 3472758 atggcacata -   | STM3303 | 100         | STM3303        | 100   |
| 3270040 atgagcaga +    | STM3111 | 100 STM1264 | 44.86 STM3111  | 100   |
| 3211681 atgaaacgat -   | STM3052 | 100 STM1655 | 59.615 STM3052 | 100   |
| 1983919 atgtccagaa +   | STM1888 | 100 STM1378 | 79 STM1888     | 100   |
| 1736954 atgaaaaagi -   | STM1644 | 100 STM3693 | 62.857 STM1644 | 100   |
| 3529126 atgaaaatca +   | STM3361 | 100 STM0823 | 69.231 STM3361 | 100   |
| 2133983 atggaaaca -    | STM2059 | 100 PSLT096 | 56 STM2059     | 100   |
| 332532 atggatcgac +    | STM0290 | 100         | STM0290        | 100   |
| 2539008 gtgcctgaga -   | STM2426 | 100 STM4492 | 59.223 STM2426 | 100   |
| 2730469 ttgacatatag +  | STM2584 | 100 STM2137 | 65 STM2584     | 100   |



|                       |         |        |         |         |         |       |
|-----------------------|---------|--------|---------|---------|---------|-------|
| 2606509 ttgattccgct:- | STM2492 | 100    | STM0525 | 71      | STM2492 | 100   |
| 2651368 atggaaata:-   | STM2518 | 100    | STM4396 | 53.465  | STM2518 | 100   |
| 2492323 atgatcgcg:-   | STM2380 | 100    | STM3586 | 66      | STM2380 | 100   |
| 2514039 atgatctatt:-  | STM2400 | 100    | STM3625 | 64.356  | STM2400 | 100   |
| 1868986 atgccgata:-   | STM1770 | 100    | STM0219 | 56.731  | STM1770 | 100   |
| 697863 atgcataact:-   | STM0635 | 100    | STM3582 | 60      | STM0635 | 100   |
| 751322 atgaaaaa:-     | STM0688 | 100    | STM0322 | 65.347  | STM0688 | 100   |
| 2478622 atgaaaaac:-   | STM2365 | 100    | STM2485 | 64.762  | STM2365 | 100   |
| P38268 atggaaca:-     | PSLT046 | 100    | STM4410 | 73.267  | PSLT046 | 100   |
| P18415 atggatgctg:-   | PSLT025 | 100    | STM0496 | 59.259  | PSLT025 | 100   |
| P00378 gtgttaagta:-   | PSLT001 | 100    | STM0820 | 62.617  | PSLT001 | 100   |
| P93918 atgactgagc:-   | PSLT111 | 100    | STM2984 | 62.037  | PSLT111 | 99.45 |
| P51692 atgagaaac:-    | PSLT061 | 100    | STM2536 | 61.538  | PSLT061 | 100   |
| P20314 atgaagcag:-    | PSLT027 | 100    | STM2933 | 61.165  | PSLT027 | 100   |
| P01155 gtgttatccct:-  | PSLT002 | 100    | STM3035 | 77.451  | PSLT002 | 100   |
| P01927 atgctcagaa:-   | PSLT005 | 100    | STM2435 | 57.692  | PSLT005 | 100   |
| R1673 -               |         |        |         |         |         |       |
| 532396 atgcctaatt:-   | STM0475 | 100    | STM2481 | 87      | STM0475 | 100   |
|                       | STM0479 | 100    | STM3766 | 76      | STM0479 | 100   |
|                       | STM0521 | 100    | STM2007 | 60      | STM0521 | 100   |
| 614164 agccgcaat:-    | STM0555 | 100    | STM2136 | 60.377  | STM0555 | 100   |
|                       | STM0585 | 100    | STM2777 | 71      | STM0585 | 100   |
|                       | STM0621 | 100    | STM0061 | 78      | STM0621 | 100   |
|                       | STM3274 | 41.176 |         | STM3274 | 2.37    |       |
|                       | STM1049 | 80     | STM0926 | 79      | STM2706 | 21.65 |
|                       | STM1820 | 58.416 | STM3483 | 58      | STM3483 | 3.94  |
|                       | STM0489 | 63.725 | STM4475 | 62.5    | STM4475 | 36.33 |
|                       | STM4210 | 82     |         | STM4210 | 32.34   |       |
|                       | STM3744 | 60.194 | STM4202 | 58.824  | STM3744 | 7.57  |
|                       | STM1015 | 70     | STM2625 | 70      | STM1015 | 60.6  |
|                       | STM4214 | 65     | STM4387 | 60.748  | STM4214 | 33.36 |
|                       | STM1457 | 100    | STM2053 | 62.136  | STM1457 | 96.17 |
|                       | STM3474 | 61.905 | STM2458 | 60      | STM2458 | 14.95 |
|                       | STM0713 | 61.165 | STM1135 | 56.604  | STM1135 | 11.64 |
|                       | STM1974 | 64.151 |         | STM1974 | 5.6     |       |
|                       | STM2036 | 43.564 |         | STM2036 | 15.89   |       |
|                       | STM1380 | 100    | STM2123 | 50      | STM1380 | 60.76 |
|                       | STM2542 | 59.223 | STM1336 | 56.731  | STM2542 | 24.31 |
|                       | STM2944 | 59.048 | STM2086 | 57.426  | STM2944 | 50.97 |
|                       | STM1008 | 79     | STM2633 | 79      | STM1008 | 19.8  |
|                       | STM4522 | 61.538 | STM3821 | 57.282  | STM3821 | 21.04 |
|                       | STM0887 | 63.81  | STM4552 | 26      | STM0887 | 28.95 |
|                       | STM2732 | 98     | STM2347 | 58.095  | STM2732 | 96.2  |
|                       | STM2289 | 55.238 | STM2360 | 36      | STM2289 | 32.82 |
|                       | STM0605 | 73     |         | STM0605 | 58.66   |       |

|         |               |         |         |         |         |         |       |
|---------|---------------|---------|---------|---------|---------|---------|-------|
|         | STM2694       | 77      | STM4415 | 59.804  | STM2694 | 68      |       |
|         | STM2761       | 59.048  | STM4262 | 55.14   | STM2761 | 40.62   |       |
|         | STM1394       | 58.095  | STM2342 | 54.902  | STM1394 | 12.42   |       |
|         | STM4281       | 99      | STM4281 | 76.238  | STM4281 | 82.52   |       |
|         | STM0782       | 41      |         |         | STM0782 | 3.16    |       |
|         | STM1963       | 57.692  | STM0109 | 55.446  | STM0109 | 4.03    |       |
|         | STM0324       | 95      | STM0325 | 95      | STM0324 | 93.2    |       |
| 203107  | atgaccattgc+  | STM0172 | 100     | STM4230 | 73      | STM0172 | 100   |
| 268931  | atggcggcac+   | STM0229 | 100     |         |         | STM0229 | 100   |
| 1589548 | atgatcggttta- | STM1511 | 100     | STM3017 | 63      | STM1511 | 100   |
| 4534387 | atgaagatac-   | STM4292 | 100     | STM2785 | 71      | STM4292 | 100   |
| 2508508 | atgttgaatga-  | STM2396 | 100     | STM1387 | 71      | STM2396 | 100   |
| 4080556 | atgtctgtgtc-  | STM3872 | 100     | STM3478 | 51      | STM3872 | 100   |
| 3556558 | atgttcgaac+   | STM3385 | 100     | STM0449 | 72      | STM3385 | 100   |
| 2112425 | atgacgattct-  | STM2034 | 100     | STM2987 | 62.857  | STM2034 | 100   |
| 2099685 | atgatgattct-  | STM2018 | 100     | STM4273 | 61.538  | STM2018 | 100   |
| 72400   | atgaaagag+    | STM0061 | 100     | STM0621 | 85      | STM0061 | 100   |
| 3474318 | atgaatttga+   | STM3305 | 100     | STM2461 | 61.765  | STM3305 | 100   |
| 3512206 | atgctgtcga-   | STM3343 | 100     | STM1478 | 63.107  | STM3343 | 100   |
| 109990  | atggggatgg-   | STM0095 | 100     | STM2662 | 67      | STM0095 | 100   |
| 178903  | atgtcagaac+   | STM0152 | 100     | STM3064 | 63.889  | STM0152 | 100   |
| 208922  | atgaaactct-   | STM0177 | 100     | STM2119 | 64      | STM0177 | 100   |
| 244362  | atggcatcga+   | STM0208 | 100     | STM0208 | 66.981  | STM0208 | 100   |
| 281656  | atgattgccat+  | STM0240 | 100     | STM2597 | 63.063  | STM0240 | 100   |
| 1602571 | atgaccatga+   | STM1524 | 100     | STM1597 | 66.667  | STM1524 | 100   |
| 711707  | atgcaagag-    | STM0648 | 100     | STM0046 | 61      | STM0648 | 100   |
| 737872  | atgaattacc-   | STM0672 | 100     | STM3216 | 57.843  | STM0672 | 100   |
| 782194  | gtgaaaaga+    | STM0716 | 100     |         |         | STM0716 | 100   |
| 4810597 | atgttcgagc+   | STM4552 | 100     |         |         | STM4552 | 100   |
| 2860342 | atgaatcctc-   | STM2715 | 100     | STM2072 | 63.551  | STM2715 | 100   |
| 2889108 | atgaaaaagi+   | STM2749 | 100     | STM3306 | 64      | STM2749 | 100   |
| 4817983 | gtgggccagc+   | STM4563 | 100     | STM2928 | 50      | STM4563 | 98.08 |
| 4852049 | gtgcaattctc-  | STM4593 | 100     | STM0023 | 78      | STM4593 | 100   |
| 338275  | atgttaaattc+  | STM0293 | 100     | STM2767 | 61.321  | STM0293 | 100   |
| 370629  | atgcaggcta+   | STM0326 | 100     | STM0325 | 74      | STM0326 | 100   |
| 1142213 | atgtgtggac-   | STM1053 | 100     | STM2299 | 57      | STM1053 | 100   |
| 4576757 | atggcagcta+   | STM4330 | 100     | STM2191 | 65.347  | STM4330 | 100   |
| 357550  | atgctgaaaa-   | STM0312 | 100     | STM3277 | 74      | STM0312 | 100   |
| 1131371 | atgcaggata+   | STM1045 | 100     | STM0921 | 76      | STM1045 | 100   |
| 1170688 | atgatagcca-   | STM1079 | 100     |         |         | STM1079 | 100   |
| 1207146 | atgtcgcaac+   | STM1122 | 100     | STM3190 | 66.981  | STM1122 | 100   |
| 1245435 | atgaaaaaa-    | STM1157 | 100     | STM3302 | 61.386  | STM1157 | 100   |
| 1290762 | gtggcagaa+    | STM1205 | 100     | STM2533 | 61      | STM1205 | 100   |
| 1172720 | atgaaaaca+    | STM1081 | 100     | STM0792 | 70      | STM1081 | 100   |
| 3573269 | gtgaaccagc-   | STM3400 | 100     | STM2556 | 59.406  | STM3400 | 100   |
| 3607200 | atggcaatcc-   | STM3456 | 100     | STM1679 | 60      | STM3456 | 100   |
| 3649205 | atgacactaa+   | STM3493 | 100     | STM0190 | 64.706  | STM3493 | 100   |
| 3681359 | atggcaagg-    | STM3518 | 100     |         |         | STM3518 | 100   |
| 3711498 | gtgagtacatt-  | STM3541 | 100     | STM3540 | 84      | STM3541 | 100   |
| 1047765 | atgaaaaacta+  | STM0964 | 100     | STM1498 | 84      | STM0964 | 100   |
| 4223992 | atgtgcacatt-  | STM4014 | 100     | STM3208 | 53.774  | STM4014 | 100   |
| 4286073 | atgttgaaatt+  | STM4075 | 100     | STM3072 | 93      | STM4075 | 100   |

|                       |         |             |                |       |
|-----------------------|---------|-------------|----------------|-------|
| 4331955 atgacattatt+  | STM4115 | 100 STM0844 | 69 STM4115     | 100   |
| 3005780 atgtcgatac+   | STM2859 | 100 STM2562 | 74.257 STM2859 | 100   |
| 3060710 atgttaaaaai-  | STM2917 | 100         | STM2917        | 100   |
| 4323806 atggatcgca-   | STM4108 | 100 STM3529 | 76 STM4108     | 100   |
| 2996544 atgagtggtt-   | STM2850 | 100 STM2322 | 61.765 STM2850 | 100   |
| 3050120 ttgaaaacaa-   | STM2908 | 100 STM0652 | 64.151 STM2908 | 100   |
| 3082475 atgagtggtt-   | STM2942 | 100 STM3771 | 59.048 STM2942 | 100   |
| 2529715 atgttcaagg+   | STM2413 | 100 STM0606 | 63.107 STM2413 | 100   |
| 2593462 gtgacggtta+   | STM2480 | 100 STM1766 | 65.347 STM2480 | 100   |
| 1114447 atgtgtcttgct- | STM1026 | 100 STM2614 | 100 STM1026    | 100   |
| 4294230 atgagacga-    | STM4085 | 100 STM1712 | 59.434 STM4085 | 100   |
| 4328380 atgaaagag+    | STM4112 | 100 STM3858 | 70 STM4112     | 100   |
| 4529482 ttgatcctgat-  | STM4287 | 100 STM4455 | 65.385 STM4287 | 100   |
| 4589166 atgagtccga+   | STM4346 | 100 STM0029 | 49 STM4346     | 100   |
| 2535691 atgcctcacg-   | STM2422 | 100 STM1913 | 59.406 STM2422 | 100   |
| 1343324 atgctgagtt+   | STM1258 | 100 STM1646 | 66.346 STM1258 | 100   |
| 1558623 atgtctggag+   | STM1480 | 100 STM3569 | 64.706 STM1480 | 100   |
| 2641709 gtgaaatcga-   | STM2514 | 100 STM2515 | 70 STM2514     | 100   |
| 25798 atgaaaaaa+      | STM0022 | 100 STM0545 | 76.699 STM0022 | 100   |
| 4617299 atggcaaga+    | STM4373 | 100 STM2668 | 61.765 STM4373 | 100   |
| 4647786 gtgccacata+   | STM4409 | 100 STM4446 | 63.208 STM4409 | 97.47 |
| 4658050 atgcgcattc+   | STM4416 | 100 STM0739 | 63.462 STM4416 | 100   |
| 2379299 atgagtagtc-   | STM2274 | 100 STM2290 | 66.337 STM2274 | 100   |
| 4741369 ttgcaaatc-    | STM4492 | 100 STM3773 | 60.55 STM4492  | 100   |
| 4773283 atgcaacgg-    | STM4517 | 100 STM0866 | 70 STM4517     | 100   |
| 1224038 atgatgacga+   | STM1133 | 100 STM4433 | 65.686 STM1133 | 100   |
| 1414676 gtgagtctga+   | STM1334 | 100 STM0775 | 60.185 STM1334 | 100   |
| 2468584 atggataccc-   | STM2357 | 100 STM0400 | 73.267 STM2357 | 100   |
| 1340757 atgtcgcgcc+   | STM1255 | 100 STM3451 | 68.627 STM1255 | 100   |
| 235261 atgaggcaat+    | STM0198 | 100 STM2689 | 62.963 STM0198 | 100   |
| 1241165 atgaccatgt-   | STM1153 | 100 STM0567 | 49.057 STM1153 | 100   |
| 1358235 atgactgaag-   | STM1282 | 100 STM4581 | 62.745 STM1282 | 98.3  |
| 1505383 atgagttcatc-  | STM1427 | 100 STM0011 | 66 STM1427     | 100   |
| 1247539 atgaaatacg-   | STM1160 | 100         | STM1160        | 100   |
| 1372814 atgcaaaag-    | STM1294 | 100 STM1806 | 63.366 STM1294 | 93.39 |
| 4204822 atgaaaaag+    | STM3997 | 100 PSLT011 | 67 STM3997     | 100   |
| 1391506 atgaacaag+    | STM1311 | 100 STM4410 | 67.327 STM1311 | 100   |
| 1964357 atgtatatcgg-  | STM1868 | 100 STM2586 | 100 STM1868    | 100   |
| 1524761 atggcaagc+    | STM1449 | 100         | STM1449        | 100   |
| 1457405 atgacatttc+   | STM1373 | 100 STM2984 | 70 STM1373     | 100   |
| 1256538 atgcaggag+    | STM1170 | 100 PSLT110 | 64.706 STM1170 | 100   |
| 1497372 atggaaacttt+  | STM1416 | 100 STM1494 | 62.376 STM1416 | 100   |
| 4081795 gtgctcaaca-   | STM3873 | 100         | STM3873        | 99.05 |
| 2786289 atgattacag-   | STM2646 | 100 STM0973 | 85 STM2646     | 100   |
| 279963 atgaccactc+    | STM0236 | 100 STM1210 | 63.725 STM0236 | 100   |
| 458001 atgttgaatgc+   | STM0401 | 100 STM1806 | 72.115 STM0401 | 100   |
| 4413920 gtgttaactttg+ | STM4189 | 100 STM1771 | 62.5 STM4189   | 100   |
| 4513157 atgaagaga-    | STM4273 | 100 STM0493 | 56.436 STM4273 | 100   |
| 1387260 atgacggcgc+   | STM1306 | 100 STM2026 | 73 STM1306     | 100   |
| 1425015 atgaccctgtc+  | STM1345 | 100 STM2913 | 61.538 STM1345 | 100   |
| 1515970 atggttcagc+   | STM1439 | 100 STM2807 | 63.208 STM1439 | 100   |
| 2913162 atggaatgtai-  | STM2770 | 100 STM2525 | 52.475 STM2770 | 100   |

|         |                |         |     |         |        |         |       |
|---------|----------------|---------|-----|---------|--------|---------|-------|
| 2178580 | gtgaagatac -   | STM2097 | 100 | STM3922 | 80     | STM2097 | 100   |
| 2717472 | atgaatcttgg -  | STM2571 | 100 | STM3002 | 63.208 | STM2571 | 100   |
| 241232  | atgctcgtcta -  | STM0205 | 100 | STM0105 | 63.81  | STM0205 | 100   |
| 90411   | atgaacaaat +   | STM0076 | 100 | STM1353 | 78     | STM0076 | 100   |
| 170768  | atgacgctgtt +  | STM0147 | 100 | STM3594 | 74.257 | STM0147 | 100   |
| 3790050 | atgcagggc -    | STM3613 | 100 | STM3635 | 62.5   | STM3613 | 100   |
| 3687206 | atgaaacaa -    | STM3523 | 100 | STM4025 | 76     | STM3523 | 100   |
| 2413040 | atgacattca -   | STM2305 | 100 | STM0158 | 62.617 | STM2305 | 100   |
| 2654226 | atgcaattgc -   | STM2520 | 100 | STM3955 | 61.386 | STM2520 | 100   |
| 467482  | atgcggcggc -   | STM0412 | 100 | STM1642 | 60     | STM0412 | 81.55 |
| 617363  | atgaaaatct -   | STM0558 | 100 | STM4205 | 82     | STM0558 | 100   |
| 4833107 | atggctcgcg -   | STM4577 | 100 | STM1646 | 63.303 | STM4577 | 100   |
| 3854492 | atgaaccggt -   | STM3666 | 100 | STM4279 | 89     | STM3666 | 100   |
| 3778825 | atgacgaata -   | STM3604 | 100 | STM3522 | 70     | STM3604 | 100   |
| 3649897 | atgaccaca -    | STM3494 | 100 | STM3961 | 60.577 | STM3494 | 100   |
| 2398158 | atgagcatca -   | STM2290 | 100 | STM1107 | 75     | STM2290 | 100   |
| 2611945 | atgacgcgcc -   | STM2497 | 100 | STM3747 | 80     | STM2497 | 100   |
| 2449141 | atgtcgagta +   | STM2337 | 100 | STM3242 | 72     | STM2337 | 100   |
| 1107979 | atgaaaaac +    | STM1015 | 100 | STM2625 | 100    | STM1015 | 100   |
| 596011  | atgaaaacgt +   | STM0532 | 100 | STM4466 | 72     | STM0532 | 100   |
| 4645019 | atgttaaaca -   | STM4407 | 100 | STM2119 | 58.824 | STM4407 | 100   |
| 2762627 | atgaccactc -   | STM2616 | 100 | STM1395 | 62.617 | STM2616 | 100   |
| 3343491 | atgagtaaca +   | STM3179 | 100 |         |        | STM3179 | 100   |
| 3639526 | atgaaaaaa -    | STM3484 | 100 | STM2730 | 76     | STM3484 | 100   |
| 2307354 | atgtccagtt -   | STM2206 | 100 | STM3256 | 68     | STM2206 | 100   |
| 2384928 | atggcataca +   | STM2278 | 100 | STM3177 | 63.208 | STM2278 | 100   |
| 2566326 | atgcctgcatt -  | STM2456 | 100 |         |        | STM2456 | 100   |
| 4290173 | atgaacagc +    | STM4080 | 100 | STM3241 | 74     | STM4080 | 100   |
| 758102  | atggccaaa -    | STM0695 | 100 |         |        | STM0695 | 100   |
| 1330417 | atgacttgctt -  | STM1242 | 100 | STM1654 | 87     | STM1242 | 96.85 |
| 3031395 | atggattatca -  | STM2886 | 100 | STM0802 | 91     | STM2886 | 100   |
| 4204182 | atgaacgac +    | STM3996 | 100 | STM2187 | 63.725 | STM3996 | 100   |
| 925468  | atggctgttga +  | STM0853 | 100 | STM2459 | 67.29  | STM0853 | 100   |
| 3614837 | atgtcagcca +   | STM3464 | 100 | STM2383 | 63.462 | STM3464 | 100   |
| 4408035 | atggttgccc -   | STM4187 | 100 | STM0516 | 65.686 | STM4187 | 100   |
| 1769673 | gtggaatattc -  | STM1676 | 100 | STM0234 | 63.81  | STM1676 | 100   |
| 3584936 | atggcaagat -   | STM3416 | 100 | STM0960 | 54     | STM3416 | 100   |
| 2280946 | atgttaaagc +   | STM2184 | 100 | STM3222 | 66     | STM2184 | 100   |
| 1827811 | atgtttcgaca +  | STM1731 | 100 | STM0498 | 62.136 | STM1731 | 100   |
| 4389833 | gtgagtttata +  | STM4173 | 100 | STM0006 | 66.019 | STM4173 | 100   |
| 2621363 | ttgcgctctttt - | STM2505 | 100 | STM2506 | 100    | STM2505 | 100   |
| 3162155 | atgctcactcc -  | STM3003 | 100 | STM2432 | 68     | STM3003 | 99.91 |
| 3035246 | atgtcattgcg -  | STM2890 | 100 | STM2891 | 100    | STM2891 | 57.87 |
| 2140951 | atgagcatta -   | STM2065 | 100 | STM1383 | 66.019 | STM2065 | 100   |
| 3529828 | atgaatgtcta -  | STM3363 | 100 | STM2040 | 48.515 | STM3363 | 100   |
| 17026   | atgaatccaa -   | STM0016 | 100 | STM0847 | 55.446 | STM0016 | 100   |
| 618390  | atggaatccc -   | STM0560 | 100 | STM3941 | 60.577 | STM0560 | 100   |
| 57189   | atgagtaaac +   | STM0047 | 100 | STM3201 | 56.311 | STM0047 | 100   |
| 781568  | atgacgactt +   | STM0715 | 100 |         |        | STM0715 | 100   |
| 1759587 | atgtcgctgtt +  | STM1666 | 100 | STM1635 | 46.078 | STM1666 | 100   |
| 4228619 | atgagtcaaa -   | STM4018 | 100 | STM4017 | 84     | STM4018 | 100   |
| 2524960 | atgactgaca -   | STM2408 | 100 | STM0054 | 55     | STM2408 | 100   |

|                       |         |     |         |         |         |     |
|-----------------------|---------|-----|---------|---------|---------|-----|
| 2286484 atgggcagcæ-   | STM2189 | 100 | STM3882 | 74      | STM2189 | 100 |
| 1449560 atgattccacæ+  | STM1365 | 100 | STM1542 | 63.81   | STM1365 | 100 |
| 1858416 atgaaaattcç-  | STM1763 | 100 | STM1578 | 89      | STM1763 | 100 |
| 1898002 gtgagtggtta+  | STM1798 | 100 | STM1200 | 64.423  | STM1798 | 100 |
| 3181822 atgcgttactç-  | STM3020 | 100 | STM0611 | 66.972  | STM3020 | 100 |
| 3114595 atgagttcattç- | STM2962 | 100 | STM3698 | 74      | STM2962 | 100 |
| 3166590 atgcactatcæ+  | STM3008 | 100 | STM0421 | 72      | STM3008 | 100 |
| 4193020 atggaatcacæ+  | STM3984 | 100 | STM2027 | 64.356  | STM3984 | 100 |
| 3709734 atgaaaaatç-   | STM3539 | 100 | STM0499 | 63.303  | STM3539 | 100 |
| 105756 atgaagaactç-   | STM0092 | 100 | STM0452 | 65.094  | STM0092 | 100 |
| 4132746 atgaaacgcæ+   | STM3922 | 100 | STM2097 | 80      | STM3922 | 100 |
| 4111826 atgacgacçæ+   | STM3903 | 100 | STM4437 | 62.617  | STM3903 | 100 |
| 1848736 atggctgccc-   | STM1752 | 100 | STM2098 | 77      | STM1752 | 100 |
| 4369936 atggtttactçæ+ | STM4153 | 100 | STM0609 | 66.355  | STM4153 | 100 |
| 1909494 atgtcccactç+  | STM1808 | 100 | STM1271 | 62.136  | STM1808 | 100 |
| 121299 atggcaattgç-   | STM0103 | 100 | STM2251 | 62.963  | STM0103 | 100 |
| 1839486 atgttgaaattç- | STM1745 | 100 | STM3629 | 67.619  | STM1745 | 100 |
| 2263470 atgaaatggtç-  | STM2166 | 100 |         | STM2166 | 100     |     |
| 4187940 atggggcgtgæ+  | STM3981 | 100 | STM4098 | 79      | STM3981 | 100 |
| 659921 atggcaatccæ+   | STM0597 | 100 | STM4202 | 67      | STM0597 | 100 |
| 1803913 atgctttcaatt- | STM1710 | 100 |         | STM1710 | 100     |     |
| 1851517 gtgtctcagccæ+ | STM1755 | 100 | STM3504 | 58.416  | STM1755 | 100 |
| 1686525 ttgctgtaagç-  | STM1596 | 100 | STM4227 | 60.377  | STM1596 | 100 |
| 1711482 atgaatcgtaç-  | STM1622 | 100 | STM1150 | 70.874  | STM1622 | 100 |
| 1752431 atgttgagaaç-  | STM1657 | 100 | STM3577 | 82      | STM1657 | 100 |
| 1766753 atgtacattatæ+ | STM1672 | 100 | STM0294 | 62.376  | STM1672 | 100 |
| 548844 atgaagccgç-    | STM0490 | 100 | STM1352 | 74.286  | STM0490 | 100 |
| 686276 atgatttccgcç-  | STM0622 | 100 | STM0060 | 79      | STM0622 | 100 |
| 3948288 atgaaaatgç-   | STM3750 | 100 | STM0149 | 74      | STM3750 | 100 |
| 1668340 atgaaaccgçæ+  | STM1581 | 100 |         | STM1581 | 100     |     |
| 1814131 gtggaattgttç- | STM1716 | 100 | STM3492 | 65.049  | STM1716 | 100 |
| 1698206 atgcgctactçæ- | STM1607 | 100 | STM1333 | 58.824  | STM1607 | 100 |
| 1643415 atgaaaattttç- | STM1561 | 100 | STM0817 | 66.337  | STM1561 | 100 |
| 1681090 gtggcaaaatæ+  | STM1593 | 100 | STM0747 | 59.615  | STM1593 | 100 |
| 1707795 atggacatcaæ+  | STM1619 | 100 | STM2372 | 63.366  | STM1619 | 100 |
| 1976842 atgacgctattæ+ | STM1883 | 100 | STM1801 | 59.615  | STM1883 | 100 |
| 1794104 atggaacaatæ+  | STM1701 | 100 | STM2554 | 50      | STM1701 | 100 |
| 1802684 atgttgagattç- | STM1708 | 100 | STM1781 | 55.34   | STM1708 | 100 |
| 2818563 atgttgataaç-  | STM2677 | 100 | STM3571 | 63.366  | STM2677 | 100 |
| 3193638 atgaacaaaç-   | STM3031 | 100 | STM1043 | 57      | STM3031 | 100 |
| 3244363 atgaaaacgç-   | STM3082 | 100 | STM0067 | 61.386  | STM3082 | 100 |
| 486817 atgagcgctcç-   | STM0433 | 100 | STM2863 | 70.874  | STM0433 | 100 |
| 515049 atggcccgtcæ+   | STM0457 | 100 | STM3962 | 68.317  | STM0457 | 100 |
| 3772413 atgttttgacç-  | STM3599 | 100 | STM4301 | 68      | STM3599 | 100 |
| 3209148 atgcagccaæ-   | STM3050 | 100 | STM4467 | 60.952  | STM3050 | 100 |
| 3877183 atgtcatccgçæ+ | STM3685 | 100 | STM2206 | 66      | STM3685 | 100 |
| 3979153 atgcgaacctæ+  | STM3777 | 100 | STM0889 | 59.406  | STM3777 | 100 |
| 3129995 atgaaaaaaæ+   | STM2976 | 100 | STM3853 | 63.107  | STM2976 | 100 |
| 3186011 atgacggaarç-  | STM3025 | 100 | STM1520 | 59.406  | STM3025 | 100 |
| 3307126 atgaataaatç-  | STM3142 | 100 | STM0494 | 53.774  | STM3142 | 100 |
| 3777223 atgctcaaccæ+  | STM3603 | 100 | STM1796 | 78      | STM3603 | 100 |
| 3264250 atggctaaacæ+  | STM3104 | 100 | STM3660 | 60.194  | STM3104 | 100 |

|         |               |          |     |         |        |          |       |
|---------|---------------|----------|-----|---------|--------|----------|-------|
| 3888340 | gtgattgtgat+  | STM3693  | 100 | STM0059 | 64.423 | STM3693  | 100   |
| 3980690 | atgcctttagtc- | STM3780  | 100 | STM3253 | 59.804 | STM3780  | 100   |
| 2810286 | atgactacgc-   | STM2668  | 100 | STM2667 | 58     | STM2668  | 100   |
| 2257099 | atggcgcttta+  | STM2160  | 100 | STM1390 | 74.257 | STM2160  | 100   |
| 2162361 | atggataata-   | STM2082  | 100 | STM0293 | 53     | STM2082  | 100   |
| 2197968 | atgctggaag-   | STM2114  | 100 | STM3399 | 76     | STM2114  | 100   |
| 2267953 | atgctaatagc+  | STM2170  | 100 | STM4324 | 64.151 | STM2170  | 100   |
| 3575708 | atgttcgacgt-  | STM3404  | 100 | STM1101 | 89     | STM3404  | 100   |
| 3781600 | atggataaaa+   | STM3607  | 100 | STM1677 | 62.5   | STM3607  | 99.67 |
| 1910881 | atggcggata-   | STM1811  | 100 |         |        | STM1811  | 100   |
| 3834661 | atgaagccgt+   | STM3646  | 100 | STM2370 | 66     | STM3646  | 100   |
| 3719386 | atgaacaag+    | STM3549  | 100 | STM3506 | 61.165 | STM3549  | 100   |
| 3489615 | atgagcaaa-    | STM3326  | 100 | STM3493 | 58.416 | STM3326  | 100   |
| 4724536 | atgcagccat+   | STM4480  | 100 | STM4160 | 64.356 | STM4480  | 100   |
| 4567345 | gtgcaacgtg-   | STM4322  | 100 | STM1773 | 56     | STM4322  | 100   |
| 3476946 | atgacgccgc-   | STM3309  | 100 | STM4438 | 60.952 | STM3309  | 100   |
| 3412375 | atgcacattac-  | STM3244  | 100 | STM3905 | 66     | STM3244  | 100   |
| 3308787 | atgcggatatt-  | STM3146  | 100 | STM2681 | 63.725 | STM3146  | 100   |
| 2981004 | atgaatcaag+   | STM2835  | 100 | STM1195 | 60     | STM2835  | 100   |
| 2083810 | atgtcactgac+  | STM2003  | 100 | STM0584 | 63.462 | STM2003  | 100   |
| 2292676 | gtgaaataca-   | STM2195  | 100 | PSLT061 | 60.194 | STM2195  | 89.66 |
| 2296507 | atgagataaa+   | STM2198  | 100 | STM3788 | 68.317 | STM2198  | 100   |
| 2335361 | atgaggcattt-  | STM2234  | 100 | STM3343 | 58.416 | STM2234  | 100   |
| 2306224 | atgagcaggc-   | STM2205  | 100 | STM1326 | 67.327 | STM2205  | 100   |
| 3575208 | atggctaaat-   | STM3403  | 100 |         |        | STM3403  | 100   |
| 3593143 | atgggtcaga-   | STM3434  | 100 | STM3914 | 62     | STM3434  | 100   |
| 3195554 | atgctgaaatt-  | STM3033  | 100 | PSLT105 | 79     | STM3033  | 100   |
| 946503  | atgagtcgga+   | STM0874  | 100 | STM0408 | 63.208 | STM0874  | 100   |
| 3360401 | atgaccttattt+ | STM3198  | 100 | STM1975 | 85     | STM3198  | 100   |
| 3254733 | atgcctgaca+   | STM3091  | 100 | STM3016 | 77     | STM3091  | 100   |
| 1170326 | atgatgaaag+   | STM1078  | 100 | STM2683 | 65.686 | STM1078  | 100   |
| 872649  | atgtcgcaatt+  | STM0804  | 100 | STM4232 | 62     | STM0804  | 100   |
| 922524  | atgcttaacta+  | STM0850  | 100 | STM3629 | 66     | STM0850  | 99.68 |
| 1179916 | atgcaaatac-   | STM1091  | 100 | STM0194 | 60.748 | STM1091  | 100   |
| 814120  | gtgactgaca+   | STM0745  | 100 | STM3159 | 70.874 | STM0745  | 100   |
| 861210  | atggctcgcc+   | STM0794  | 100 | STM3704 | 57.944 | STM0794  | 100   |
| 910198  | atgacgactc-   | STM0841  | 100 | STM0736 | 70.874 | STM0841  | 100   |
| 3500411 | atgagccagc+   | STM3331  | 100 | STM2479 | 82     | STM3331  | 100   |
| 3957628 | atgccaactc+   | STM3757  | 100 | STM2513 | 66     | STM3757  | 100   |
| 2808006 | atgacaatga+   | STM2665  | 100 | STM4292 | 64.078 | STM2665  | 100   |
| 2497896 | atgcaagtttt-  | STM2387  | 100 |         |        | STM2387  | 100   |
| 4461701 | atgatgaata+   | STM4240  | 100 | STM1695 | 54.369 | STM4240  | 100   |
| 3584290 | atgcagggtt-   | STM3415  | 100 |         |        | STM3415  | 100   |
| 1785327 | atgcbgctgg+   | STM1692  | 100 | STM3630 | 64.706 | STM1692  | 100   |
| 520862  | atgaagctgg+   | STM0462  | 100 | STM2561 | 85     | STM0462  | 100   |
| 4253407 | Agtgaacgtt+   | STM4042A | 100 | STM1664 | 64     | STM4042A | 92.2  |
| 787207  | atgaaaaggt+   | STM0721  | 100 |         |        | STM0721  | 100   |
| 4360026 | atggagacct-   | STM4141  | 100 | STM0651 | 64.078 | STM4141  | 100   |
| 2551520 | atgccaggcc+   | STM2439  | 100 | STM0189 | 62.5   | STM2439  | 100   |
| 1105000 | atgctccaag-   | STM1011  | 100 | STM2629 | 100    | STM1011  | 100   |
| 4427281 | atgataaaat-   | STM4206  | 100 | STM0559 | 70     | STM4206  | 100   |
| 2865801 | atgaacacgc+   | STM2722  | 100 |         |        | STM2722  | 100   |

|         |               |         |        |         |        |         |       |
|---------|---------------|---------|--------|---------|--------|---------|-------|
| 1975533 | atggcgggtg:-  | STM1882 | 100    | STM4104 | 68.932 | STM1882 | 100   |
| 2859179 | atgaggattg:-  | STM2713 | 100    | STM2714 | 100    | STM2713 | 100   |
| 2869988 | atgaactcat:-  | STM2727 | 100    | STM2728 | 90     | STM2727 | 100   |
| 4297354 | atgtcttaga:+  | STM4088 | 100    | STM0435 | 59.223 | STM4088 | 100   |
| 3071785 | atgggtaaac:-  | STM2931 | 100    |         |        | STM2931 | 100   |
| 1459296 | atgaaccgta:-  | STM1376 | 100    | STM1377 | 90     | STM1376 | 100   |
| 1450254 | gtgatatactg+  | STM1367 | 100    | STM2643 | 60.577 | STM1367 | 100   |
| 1522645 | atgcctatga:+  | STM1447 | 100    | STM0153 | 60.952 | STM1447 | 100   |
| 1143714 | atgttcgtaga:- | STM1056 | 100    | STM1241 | 74     | STM1056 | 100   |
| 2575111 | atggaggcg:-   | STM2464 | 100    | STM4243 | 59.804 | STM2464 | 100   |
| 189965  | atggattacg:+  | STM0160 | 100    | STM3664 | 68     | STM0160 | 100   |
| 4414858 | atggctcatg:+  | STM4191 | 100    | STM0520 | 31     | STM4191 | 100   |
| 1953813 | atggaattca:+  | STM1856 | 100    | STM1422 | 58.654 | STM1856 | 100   |
| 1931746 | atgactatca:+  | STM1833 | 100    | STM1185 | 55.446 | STM1833 | 100   |
| 1969916 | atggcttctt:-  | STM1875 | 100    | STM2690 | 58.824 | STM1875 | 100   |
| 1966040 | atgaatctgt:-  | STM1869 | 100    | STM0713 | 62.376 | STM1869 | 100   |
| 2022857 | atgattaattal+ | STM1926 | 100    | STM2423 | 57.426 | STM1926 | 100   |
| P16380  | atgtcagggc:-  | PSLT021 | 100    | PSLT022 | 100    | PSLT022 | 100   |
| P76449  | atgaaacgta:+  | PSLT095 | 100    | STM3051 | 61.165 | PSLT095 | 100   |
| P49866  | ctgtggcagg:-  | PSLT058 | 100    | PSLT059 | 100    | PSLT058 | 100   |
| P76675  | atgaagataa:+  | PSLT096 | 100    | STM4494 | 59     | PSLT096 | 100   |
| P01600  | ttgatccttga:+ | PSLT003 | 100    | STM2875 | 89     | PSLT003 | 100   |
| P71602  | atgagtacaa:+  | PSLT089 | 100    | STM2247 | 62.376 | PSLT089 | 100   |
| R21650  | +             | STM0976 | 60     |         |        | STM0976 | 10.52 |
| R14810  | -             | STM2560 | 60.377 | STM3012 | 48     | STM2560 | 16.42 |
| R25762  | -             | STM3638 | 44.554 |         |        | STM3638 | 15.11 |
| R4848   | +             |         |        |         |        |         |       |
| R2040   | -             | STM1284 | 39     | STM1411 | 37     | STM1284 | 12.49 |
| R38118  | +             | STM3073 | 38.835 |         |        | STM3073 | 13.61 |
|         |               | STM0637 | 100    | STM0863 | 74     | STM0637 | 100   |
|         |               | STM0657 | 100    | STM0655 | 70     | STM0657 | 100   |
|         |               | STM0740 | 100    | STM1792 | 76     | STM0740 | 100   |
|         |               | STM2600 | 100    | STM0914 | 74     | STM2600 | 100   |
| 2761154 | atgccagca:+   | STM2614 | 100    | STM4116 | 59.406 | STM2614 | 100   |
|         |               | STM2646 | 100    | STM4146 | 59.434 | STM2646 | 100   |
|         |               | STM2944 | 78     |         |        | STM2944 | 46.18 |
|         |               | STM1383 | 43.564 |         |        | STM1383 | 10.38 |
|         |               | STM2739 | 50     | STM3256 | 37     | STM2739 | 17.73 |
|         |               | STM2720 | 98     | STM3938 | 47     | STM2720 | 85.78 |
|         |               | STM2233 | 80     | STM3548 | 62     | STM2233 | 59.17 |
|         |               | STM2807 | 44     |         |        | STM2807 | 3.86  |
|         |               | STM1835 | 62.857 | STM1166 | 60.55  | STM1166 | 6.97  |
|         |               | STM1099 | 59.633 | STM4453 | 52.427 | STM1099 | 33.31 |
|         |               | STM2718 | 95     | STM0256 | 57     | STM2718 | 74.42 |
|         |               | STM2701 | 94     | STM4533 | 60     | STM2701 | 83.7  |
|         |               | STM3755 | 99     | STM3545 | 56.311 | STM3755 | 73.2  |
|         |               | STM1506 | 100    | STM3082 | 71     | STM1506 | 66.92 |
|         |               | STM3865 | 56.311 | STM0370 | 52.778 | STM3865 | 28.03 |
|         |               | STM1032 | 56     | STM1202 | 53.922 | STM1032 | 10.25 |
|         |               | STM2708 | 88     | STM1970 | 62.5   | STM2708 | 81.3  |
|         |               | STM3639 | 67.327 | STM0339 | 63.107 | STM0176 | 47.93 |
|         |               | STM4051 | 61.111 | STM3650 | 60.194 | STM4051 | 21.59 |

|         |               |         |         |         |         |         |     |
|---------|---------------|---------|---------|---------|---------|---------|-----|
|         | STM3369       | 60      |         | STM3369 | 10.41   |         |     |
|         | STM2722       | 99      | STM2811 | 57      | STM2722 | 90.7    |     |
|         | STM2695       | 92      | STM0038 | 64.22   | STM2695 | 79.8    |     |
|         | STM1192       | 62.5    | STM1427 | 60.396  | STM2942 | 28.11   |     |
|         | STM0283       | 97      | STM1683 | 84      | STM0283 | 90      |     |
|         | STM4325       | 62.376  | STM2668 | 61.905  | STM2668 | 8.92    |     |
|         | STM1318       | 56.311  | STM3051 | 53.922  | STM1318 | 8.48    |     |
|         | STM3657       | 99      |         | STM3657 | 98.3    |         |     |
|         | STM4025       | 61.538  | STM3523 | 59.615  | STM0164 | 17.45   |     |
|         | STM3807       | 36.634  |         | STM3807 | 5.81    |         |     |
|         | STM1003       | 59.615  |         | STM1003 | 5.75    |         |     |
|         | PSLT012       | 96      | STM2922 | 62.037  | PSLT012 | 92.3    |     |
|         | STM3656       | 100     | STM0698 | 64      | STM3656 | 97.3    |     |
|         | STM0945       | 60      | STM0740 | 50.98   | STM0945 | 17.72   |     |
|         | STM1557       | 54.902  | STM4258 | 49.038  | STM1557 | 15.78   |     |
|         | STM4312       | 98      | STM2105 | 64.078  | STM4312 | 36.48   |     |
|         | STM4317       | 95      | STM0309 | 63.725  | STM4317 | 89.5    |     |
|         | STM3096       | 60.952  | STM0979 | 52      | STM3096 | 39.75   |     |
|         | STM3639       | 62.385  | STM4594 | 58.879  | STM0300 | 32.97   |     |
| 3541899 | atgacaactc -  | STM3371 | 100     | STM1850 | 65.049  | STM3371 | 100 |
| 721042  | atggacaagc +  | STM0657 | 100     | STM0655 | 81      | STM0657 | 100 |
| 755255  | atgggtgatgt - | STM0691 | 100     | STM2106 | 58.879  | STM0691 | 100 |
| 4023363 | atgaaaaata -  | STM3822 | 100     | STM3644 | 72      | STM3822 | 100 |
| 3334422 | atggacttga +  | STM3171 | 100     | STM4052 | 73.786  | STM3171 | 100 |
| 2102014 | atgcttgccac - | STM2020 | 100     | STM0511 | 69      | STM2020 | 100 |
| 4038836 | atgaattaac +  | STM3834 | 100     | STM2281 | 62      | STM3834 | 100 |
| 4064625 | atgaaagtal -  | STM3857 | 100     | STM2862 | 67.647  | STM3857 | 100 |
| 3987571 | atgctggcctt - | STM3787 | 100     | STM2283 | 78      | STM3787 | 100 |
| 93518   | atgcagcagc +  | STM0079 | 100     | STM4418 | 66      | STM0079 | 100 |
| 152618  | atgaatacac +  | STM0129 | 100     | STM1744 | 61.818  | STM0129 | 100 |
| 193394  | gtggagacta +  | STM0163 | 100     | STM0091 | 66      | STM0163 | 100 |
| 141348  | atgatggaaa +  | STM0120 | 100     | STM0084 | 62.376  | STM0120 | 100 |
| 3513242 | atgaaaacttt - | STM3345 | 100     | STM2894 | 59.223  | STM3345 | 100 |
| 3551925 | atgttgatae +  | STM3380 | 100     | STM4290 | 61      | STM3380 | 100 |
| 706871  | atggcgttatt + | STM0644 | 100     | STM4211 | 65.094  | STM0644 | 100 |
| 729835  | atgataaagg -  | STM0665 | 100     | STM0887 | 62.745  | STM0665 | 100 |
| 761398  | atggcaatcc +  | STM0698 | 100     | STM0242 | 74      | STM0698 | 100 |
| 266991  | ttgactactaa + | STM0227 | 100     |         | STM0227 | 100     |     |
| 1587805 | atgatgacat -  | STM1509 | 100     | STM3376 | 63.81   | STM1509 | 100 |
| 2179850 | atgatgaattt - | STM2098 | 100     | STM1752 | 77      | STM2098 | 100 |
| 2213843 | gtgttatcgg +  | STM2125 | 100     | STM2048 | 64.151  | STM2125 | 100 |
| 295872  | atgactatccc + | STM0255 | 100     | STM3165 | 70.297  | STM0255 | 100 |
| 343542  | atggcggtag +  | STM0300 | 100     | STM0176 | 62      | STM0300 | 100 |
| 2223137 | atgacagaar +  | STM2129 | 100     | STM3887 | 71      | STM2129 | 100 |
| 2861956 | atgagcctga -  | STM2719 | 100     | STM0843 | 66.019  | STM2719 | 100 |
| 2890113 | atgatgattta + | STM2751 | 100     | STM2834 | 60.396  | STM2751 | 100 |
| 2910402 | atgtccaactc - | STM2767 | 100     | STM0722 | 77.228  | STM2767 | 100 |
| 2945600 | atgggactttt - | STM2795 | 100     | STM2559 | 51.429  | STM2795 | 100 |
| 1187288 | atgaaacctg -  | STM1099 | 100     | STM1591 | 62.376  | STM1099 | 100 |
| 2903354 | atgaaaatttc + | STM2761 | 100     | PSLT075 | 62.136  | STM2761 | 100 |
| 2935567 | atgaaaaaa +   | STM2786 | 100     |         | STM2786 | 100     |     |
| 1177863 | ttgacttcttc + | STM1089 | 100     | STM1245 | 67.961  | STM1089 | 100 |



|                       |         |     |         |        |         |       |
|-----------------------|---------|-----|---------|--------|---------|-------|
| 3585995 atgaaagttc-   | STM3419 | 100 | STM1528 | 52     | STM3419 | 100   |
| 3616277 atgggtctgg+   | STM3466 | 100 | STM0103 | 59.223 | STM3466 | 100   |
| 3656186 atggaaagtg-   | STM3499 | 100 | STM2062 | 63     | STM3499 | 100   |
| 1182107 atgaaaaagi-   | STM1094 | 100 |         |        | STM1094 | 100   |
| 1216156 atggagcctc-   | STM1127 | 100 | STM1887 | 61.386 | STM1127 | 100   |
| 1247906 atggaaaag:-   | STM1161 | 100 | STM2972 | 59.615 | STM1161 | 100   |
| 1291791 atgacaaaa:+   | STM1207 | 100 | STM0417 | 61.321 | STM1207 | 100   |
| 1327207 atgctcaaac+   | STM1239 | 100 | STM2255 | 61     | STM1239 | 100   |
| 1357407 atgttgatgtc-  | STM1280 | 100 | STM0019 | 56     | STM1280 | 100   |
| 1065677 atgacggca:+   | STM0980 | 100 |         |        | STM0980 | 100   |
| 1125159 atgacagac:+   | STM1038 | 100 | STM0916 | 84     | STM1038 | 100   |
| 4432888 ttggccaacg-   | STM4211 | 100 | STM0644 | 65.347 | STM4211 | 100   |
| 4466526 atggcaacgc-   | STM4245 | 100 |         |        | STM4245 | 100   |
| 4522671 atgagccagt+   | STM4282 | 100 |         |        | STM4282 | 100   |
| 3070269 atgacagagt-   | STM2928 | 100 | STM4427 | 75.248 | STM2928 | 100   |
| 4443199 gtggttattttg+ | STM4223 | 100 | STM1000 | 65     | STM4223 | 100   |
| 4510273 atggatatca-   | STM4270 | 100 | STM1713 | 61.765 | STM4270 | 100   |
| 4554949 atgaaacagt+   | STM4306 | 100 | STM2529 | 74     | STM4306 | 100   |
| 2489836 atgaaacgtg-   | STM2378 | 100 | STM1197 | 73     | STM2378 | 100   |
| 2548420 atgggacaa(-   | STM2435 | 100 | STM1450 | 59.434 | STM2435 | 100   |
| 995486 atgaacaaa:-    | STM0924 | 100 | STM1044 | 70.588 | STM0924 | 100   |
| 4243214 atgagtattcg-  | STM4034 | 100 | STM2532 | 70.588 | STM4034 | 100   |
| 4429384 atggctgaga-   | STM4208 | 100 | STM1717 | 47     | STM4208 | 100   |
| 4458601 atgtccggct(-  | STM4235 | 100 |         |        | STM4235 | 100   |
| 3055507 ttgacagtaa:+  | STM2912 | 100 | STM3367 | 63.107 | STM2912 | 100   |
| 3094181 atggcgtaa(-   | STM2950 | 100 | STM4496 | 85     | STM2950 | 100   |
| 973407 atgctgacag+    | STM0902 | 100 | STM1991 | 56     | STM0902 | 100   |
| 1394819 atgatgcagc+   | STM1315 | 100 | STM3528 | 75     | STM1315 | 100   |
| 2576559 atgatcattga-  | STM2466 | 100 | STM2338 | 68     | STM2466 | 100   |
| 1320857 atggaattatc-  | STM1232 | 100 | STM0912 | 57     | STM1232 | 100   |
| 1510975 atgaatcgcc-   | STM1432 | 100 | STM1485 | 62.745 | STM1432 | 100   |
| 2055888 atgattatttal+ | STM1967 | 100 |         |        | STM1967 | 99.23 |
| 2354744 atgaaaagc(-   | STM2256 | 100 | STM2144 | 65.094 | STM2256 | 100   |
| 4667890 gtgggagcc:+   | STM4424 | 100 |         |        | STM4424 | 100   |
| 4689330 atgaaactga+   | STM4447 | 100 | STM3767 | 63.462 | STM4447 | 100   |
| 2430905 atgaccttaa(-  | STM2321 | 100 | STM1458 | 60.952 | STM2321 | 100   |
| 2460270 atgagtaagc-   | STM2348 | 100 | STM3949 | 59     | STM2348 | 100   |
| 2044688 atgacggtgc-   | STM1955 | 100 |         |        | STM1955 | 100   |
| 233960 atggctcact:+   | STM0196 | 100 | STM0023 | 72.115 | STM0196 | 100   |
| 2023282 atgagctaca+   | STM1927 | 100 | STM3591 | 68     | STM1927 | 100   |
| 1388221 atggataactl+  | STM1307 | 100 | STM0603 | 63.303 | STM1307 | 100   |
| 1523360 atgtctgataa+  | STM1448 | 100 | STM2914 | 47     | STM1448 | 100   |
| 4275341 atgaaaaaa:+   | STM4064 | 100 | STM4070 | 87     | STM4064 | 100   |
| 3008960 atgaactggc+   | STM2863 | 100 | STM0433 | 71.569 | STM2863 | 100   |
| 1527955 gtgtctactgc-  | STM1452 | 100 | STM3592 | 74     | STM1452 | 100   |
| 2633708 gtgcgaaata-   | STM2513 | 100 | STM3478 | 73     | STM2513 | 100   |
| 1425241 atgtcgcgtat-  | STM1346 | 100 |         |        | STM1346 | 100   |
| 1529884 atgagcgaa(-   | STM1454 | 100 | STM2533 | 54.455 | STM1454 | 100   |
| 1508945 atggcaaca(-   | STM1430 | 100 | STM3886 | 68     | STM1430 | 100   |
| 1454942 atgttaagcat+  | STM1371 | 100 | STM2691 | 61.765 | STM1371 | 100   |
| 3014468 atgctcaaaa-   | STM2869 | 100 | STM2870 | 100    | STM2869 | 55.05 |
| 1512349 atgtccgata(-  | STM1434 | 100 | STM3027 | 86     | STM1434 | 100   |

|                        |         |             |                |       |
|------------------------|---------|-------------|----------------|-------|
| 1560612 atgttttactgg + | STM1482 | 100 STM1483 | 58 STM1482     | 100   |
| 2169917 gtgaaagtcc:-   | STM2088 | 100 STM2083 | 61.165 STM2088 | 100   |
| 4002872 atggaacccc-    | STM3800 | 100 STM3121 | 59.615 STM3800 | 98.4  |
| 2787297 atggcgactg +   | STM2647 | 100 STM2028 | 62.745 STM2647 | 100   |
| 451484 atggcgagaa +    | STM0397 | 100 STM3502 | 72 STM0397     | 100   |
| 286338 atggcgctca:-    | STM0245 | 100 STM0510 | 76 STM0245     | 100   |
| 117235 atgaatgtga +    | STM0100 | 100 STM2128 | 58.824 STM0100 | 100   |
| 82510 atgagtgagti-     | STM0070 | 100 STM3983 | 67.647 STM0070 | 100   |
| 2040380 atgcaggaa:-    | STM1950 | 100 STM1767 | 65 STM1950     | 100   |
| 1777721 atgctctgg:-    | STM1683 | 100 STM2562 | 70 STM1683     | 100   |
| 3732333 atgtccgagc-    | STM3563 | 100 STM0813 | 61 STM3563     | 100   |
| 1568387 atgcatcgtt:-   | STM1490 | 100 STM1489 | 63 STM1490     | 100   |
| 3994511 atggatatcg:-   | STM3793 | 100 STM4066 | 67.308 STM3793 | 100   |
| 405289 atgttgaaag +    | STM0357 | 100 STM0564 | 62.376 STM0357 | 100   |
| 470947 atgcaggatg +    | STM0416 | 100 PSLT108 | 63.208 STM0416 | 100   |
| 4455196 atgtcacacc +   | STM4233 | 100 STM3701 | 57.692 STM4233 | 100   |
| 115433 gtggcgcaç-      | STM0097 | 100 STM3370 | 65.714 STM0097 | 100   |
| 3404682 atggaatcgg-    | STM3239 | 100 STM3625 | 72 STM3239     | 100   |
| 3637251 atgactaacg-    | STM3481 | 100 STM0421 | 64 STM3481     | 100   |
| 389987 atgcattcca +    | STM0345 | 100 STM0342 | 62.745 STM0345 | 100   |
| 2554592 atggcggaaç-    | STM2442 | 100 STM2443 | 70.192 STM2442 | 100   |
| 567125 atgccagcç +     | STM0507 | 100 STM1218 | 71.698 STM0507 | 100   |
| 667877 atgtcggtttai-   | STM0605 | 100 STM2239 | 53 STM0605     | 100   |
| 2792540 atgagccagç +   | STM2651 | 100 STM0918 | 66.667 STM2651 | 100   |
| 3370462 gtgaagattta +  | STM3204 | 100 STM0460 | 61.905 STM3204 | 100   |
| 3417343 atgacgatga-    | STM3248 | 100 STM0519 | 66.337 STM3248 | 100   |
| 3443340 atgactgaca +   | STM3276 | 100 STM4477 | 64.078 STM3276 | 100   |
| 1129921 atgaaaaag +    | STM1043 | 100 STM0920 | 74 STM1043     | 100   |
| 1106159 atggcttacc +   | STM1013 | 100 STM2627 | 100 STM1013    | 100   |
| 2662916 atgagtcagti-   | STM2529 | 100 STM4306 | 74 STM2529     | 100   |
| 2686261 atgacccttc +   | STM2547 | 100 STM2248 | 61.538 STM2547 | 100   |
| 597119 atgaagcaaç-     | STM0533 | 100         | STM0533        | 100   |
| 2749427 gtgtttgctcat + | STM2599 | 100 STM3631 | 63.462 STM2599 | 100   |
| 4810110 atgacaaccc-    | STM4551 | 100 STM0385 | 66.99 STM4551  | 100   |
| 3902388 atgaaaaata-    | STM3707 | 100 STM3707 | 59.615 STM3707 | 100   |
| 2464308 atgtgttacgg-   | STM2353 | 100 STM0889 | 69.608 STM2353 | 100   |
| 13509 atgggtaaaa +     | STM0012 | 100 STM2539 | 67 STM0012     | 100   |
| 1820112 atgcaaacaç +   | STM1723 | 100 STM2146 | 66.019 STM1723 | 100   |
| 2957153 atggcaatta +   | STM2809 | 100 STM1226 | 70.297 STM2809 | 100   |
| 4263235 atggattctgt +  | STM4051 | 100 STM1131 | 65.049 STM4051 | 100   |
| 708520 atgatcaggti-    | STM0646 | 100 STM0563 | 65.686 STM0646 | 100   |
| 2573386 atggcgcaç-     | STM2462 | 100 STM0593 | 70.874 STM2462 | 100   |
| 4343997 atgaatattcg +  | STM4125 | 100 STM0256 | 65.347 STM4125 | 100   |
| 845230 atgcaggccç-     | STM0779 | 100 STM3576 | 57 STM0779     | 100   |
| 835496 atgacctgtc +    | STM0770 | 100 STM1340 | 69.608 STM0770 | 100   |
| 2952509 atgagcgcç +    | STM2806 | 100 STM2948 | 66.019 STM2806 | 100   |
| 1419368 atggcgcttaç +  | STM1339 | 100 STM0451 | 60 STM1339     | 100   |
| 3550565 atggatatcg +   | STM3379 | 100 STM0973 | 62.037 STM3379 | 100   |
| 63413 atgtttatagç-     | STM0053 | 100 STM0625 | 67 STM0053     | 97.65 |
| 42913 atgatgtttgg +    | STM0036 | 100 STM3966 | 72 STM0036     | 100   |
| 1331665 atggaacgtc +   | STM1245 | 100 STM1089 | 63.366 STM1245 | 100   |
| 2092968 atgacagcaç +   | STM2010 | 100 STM1849 | 82 STM2010     | 100   |

|                         |         |     |         |        |         |       |
|-------------------------|---------|-----|---------|--------|---------|-------|
| 4078521 atgtctgaattt -  | STM3868 | 100 | STM3165 | 67.327 | STM3868 | 100   |
| 2125204 atgcatctggc +   | STM2049 | 100 |         |        | STM2049 | 100   |
| 4555715 atgcatgagtt +   | STM4307 | 100 | STM0613 | 62.5   | STM4307 | 100   |
| 2004330 gtgaatattca +   | STM1909 | 100 | STM4118 | 61     | STM1909 | 100   |
| 3534227 atggaacgat +    | STM3367 | 100 | STM3661 | 63.551 | STM3367 | 100   |
| 3914528 atgagcaga: -    | STM3718 | 100 | STM3718 | 61.538 | STM3718 | 100   |
| 4575067 atgagtattcg +   | STM4329 | 100 | STM0960 | 63     | STM4329 | 100   |
| 1229723 atgaaacgct -    | STM1141 | 100 | STM3080 | 62.136 | STM1141 | 100   |
| 4236558 atgagtcttac +   | STM4025 | 100 | STM3523 | 76     | STM4025 | 100   |
| 4386981 atgaacaag: +    | STM4170 | 100 | STM0451 | 76     | STM4170 | 100   |
| 2547557 atgaagagtt: -   | STM2434 | 100 | STM0888 | 62.136 | STM2434 | 100   |
| 2123025 atggacagta +    | STM2044 | 100 | STM2365 | 76.699 | STM2044 | 93.85 |
| 4540967 atgatgaaag -    | STM4296 | 100 | STM0234 | 69.903 | STM4296 | 100   |
| 4106838 atggcggaa: +    | STM3898 | 100 | STM0541 | 56.863 | STM3898 | 100   |
| 2051227 atgtacaccg +    | STM1961 | 100 | STM4299 | 50     | STM1961 | 100   |
| 1809381 atgaaattgc: -   | STM1713 | 100 | STM4125 | 80.198 | STM1713 | 100   |
| 4469117 atgcaagcg: +    | STM4247 | 100 | STM1802 | 69     | STM4247 | 100   |
| 3486153 atgcagctca +    | STM3321 | 100 | STM2665 | 62.745 | STM3321 | 100   |
| 483151 atgaaactttc -    | STM0429 | 100 | STM4015 | 61.165 | STM0429 | 100   |
| 4182916 atgtttgatatt: + | STM3976 | 100 | STM4564 | 62.376 | STM3976 | 100   |
| 4165089 atgatgatgct +   | STM3959 | 100 | STM1270 | 61.538 | STM3959 | 100   |
| 4150476 atgtttttgttai + | STM3942 | 100 | STM1989 | 61.111 | STM3942 | 100   |
| 4685754 atgttcctgat: +  | STM4443 | 100 | STM0847 | 56.863 | STM4443 | 99.61 |
| 7396 atgcctgagtt -      | STM0006 | 100 | STM1003 | 66.337 | STM0006 | 100   |
| 1265403 atgatcgag +     | STM1182 | 100 |         |        | STM1182 | 100   |
| 2058221 atgagtgcga +    | STM1969 | 100 |         |        | STM1969 | 100   |
| 3092510 atgacgacac -    | STM2948 | 100 | STM3772 | 60.194 | STM2948 | 100   |
| 3157832 atgaaaaaa: -    | STM3000 | 100 | STM0144 | 62     | STM3000 | 100   |
| 3183752 atgtctaaat +    | STM3022 | 100 | STM3243 | 65.421 | STM3022 | 100   |
| 4298061 atgaaatacg -    | STM4089 | 100 | STM3526 | 67.29  | STM4089 | 100   |
| 4180298 atgacgcca: +    | STM3972 | 100 | STM1238 | 64     | STM3972 | 100   |
| 1676762 atgccgggta -    | STM1588 | 100 | STM0003 | 63.107 | STM1588 | 100   |
| 1621339 atgtttaagag -   | STM1544 | 100 |         |        | STM1544 | 100   |
| 1647508 atggaaacta +    | STM1566 | 100 |         |        | STM1566 | 100   |
| 1911618 atgtatcaac: -   | STM1812 | 100 | STM0331 | 63     | STM1812 | 100   |
| 1940011 atggaaaaa: +    | STM1843 | 100 | STM2129 | 89     | STM1843 | 100   |
| 1982353 atgaatatgct +   | STM1887 | 100 | STM0844 | 67     | STM1887 | 100   |
| 1997774 atgctgaaac +    | STM1902 | 100 | PSLT108 | 60.577 | STM1902 | 100   |
| 566468 atgaacttca: -    | STM0506 | 100 | STM3614 | 65     | STM0506 | 94.91 |
| 594293 atgtttacatc: +   | STM0530 | 100 | STM0680 | 62.385 | STM0530 | 100   |
| 636828 gtgagacatg -     | STM0577 | 100 | STM3598 | 62.745 | STM0577 | 100   |
| 1736042 atgagcaag: +    | STM1642 | 100 | STM2050 | 61.905 | STM1642 | 100   |
| 1625953 atgactatccc +   | STM1548 | 100 | STM0404 | 65.686 | STM1548 | 100   |
| 1817400 atgagccagt -    | STM1720 | 100 | STM4581 | 59     | STM1720 | 100   |
| 1866078 atgtttaaacg +   | STM1766 | 100 | STM2480 | 66     | STM1766 | 100   |
| 1906608 atggcattaa -    | STM1805 | 100 | STM1541 | 66     | STM1805 | 100   |
| 1950014 atggctcaac +    | STM1850 | 100 | STM3408 | 63.725 | STM1850 | 93.39 |
| 1759221 atgtctctatg +   | STM1665 | 100 |         |        | STM1665 | 100   |
| 539631 atgctgttaca -    | STM0481 | 100 | STM2308 | 63.81  | STM0481 | 100   |
| 3327883 atgcatataa: +   | STM3166 | 100 | STM0618 | 62.745 | STM3166 | 100   |
| 2840527 atgggaaga: +    | STM2690 | 100 | STM0793 | 62.037 | STM2690 | 100   |
| 4787256 atgaccccgc: -   | STM4530 | 100 | STM4531 | 74     | STM4530 | 91.93 |

|                      |         |     |         |                |       |
|----------------------|---------|-----|---------|----------------|-------|
| 443840 atgctgtggtr-  | STM0392 | 100 |         | STM0392        | 100   |
| 3286911 atgtttaaana- | STM3126 | 100 | STM0394 | 74.757 STM3126 | 100   |
| 2713941 ttgaaaaaatl+ | STM2567 | 100 |         | STM2567        | 100   |
| 2933774 atgaagtggg-  | STM2784 | 100 | STM2785 | 93 STM2784     | 96.52 |
| 3323962 atgaaaaaal-  | STM3163 | 100 | STM0442 | 62.5 STM3163   | 100   |
| 908728 ctgaaaaagr-   | STM0840 | 100 | STM0842 | 88 STM0840     | 100   |
| 4006387 atgacaggar-  | STM3803 | 100 | STM0036 | 70.588 STM3803 | 100   |
| 2807396 atgacgcgca+  | STM2663 | 100 | STM4540 | 55.769 STM2663 | 100   |
| 2855569 atgagcgcac-  | STM2703 | 100 | STM2706 | 100 STM2706    | 100   |
| 2962950 atgagcgcac+  | STM2814 | 100 | STM2050 | 82 STM2814     | 100   |
| 2951585 atgacaacgt+  | STM2804 | 100 | STM4437 | 86 STM2804     | 100   |
| 3850215 atgatattgac- | STM3663 | 100 |         | STM3663        | 100   |
| 3920615 atgctcgaatt+ | STM3724 | 100 |         | STM3724        | 100   |
| 3123486 atgattagcgt+ | STM2971 | 100 | STM1826 | 87 STM2971     | 100   |
| 3156419 atgtcgcaccc- | STM2997 | 100 | STM3220 | 61.538 STM2997 | 100   |
| 2283863 atgttaacaa-  | STM2187 | 100 | STM3512 | 58.654 STM2187 | 100   |
| 2326308 atgattttaca+ | STM2223 | 100 |         | STM2223        | 100   |
| 2347349 atgcctgaag+  | STM2246 | 100 | STM1767 | 69.307 STM2246 | 100   |
| 1918460 atgcgaattct- | STM1820 | 100 |         | STM1820        | 100   |
| 3589806 atgagcatgc-  | STM3426 | 100 | STM2071 | 64.423 STM3426 | 100   |
| 1022667 atgggtaaga+  | STM0944 | 100 | STM3603 | 53.465 STM0944 | 100   |
| 1011825 atgaaacaa-   | STM0935 | 100 | STM3901 | 64.706 STM0935 | 100   |
| 3594624 atggcagttgt- | STM3437 | 100 | STM0053 | 61.111 STM3437 | 100   |
| 4588800 atgaccacac+  | STM4345 | 100 | STM0969 | 66.667 STM4345 | 100   |
| 4630909 atgcgctatta+ | STM4391 | 100 | STM1446 | 65.347 STM4391 | 100   |
| 3366883 atgacgccgc-  | STM3201 | 100 | STM2535 | 63.366 STM3201 | 100   |
| 3291457 atggatgcga-  | STM3131 | 100 | STM4509 | 70 STM3131     | 100   |
| 4633027 atggataccc+  | STM4395 | 100 |         | STM4395        | 100   |
| 4765060 atgaaacac+   | STM4510 | 100 |         | STM4510        | 100   |
| 4570830 atgatagttgt- | STM4325 | 100 | STM3599 | 68 STM4325     | 100   |
| 429985 atgctgtttgc-  | STM0375 | 100 | STM4447 | 61.538 STM0375 | 100   |
| 2239505 atgaacgggc+  | STM2144 | 100 | STM0718 | 65.714 STM2144 | 100   |
| 2321744 atgacatctcc+ | STM2219 | 100 | STM0848 | 78 STM2219     | 100   |
| 2328888 atgccacaac+  | STM2227 | 100 | STM3359 | 55.14 STM2227  | 100   |
| 2195064 atgttttaagc- | STM2111 | 100 |         | STM2111        | 100   |
| 2267225 atgaacctg-   | STM2169 | 100 | STM3562 | 61.905 STM2169 | 100   |
| 3879139 atgacgcagc+  | STM3687 | 100 | STM3027 | 69.307 STM3687 | 100   |
| 3782701 atgacgcagc+  | STM3608 | 100 |         | STM3608        | 100   |
| 3670013 atgaccgtat+  | STM3511 | 100 | STM2495 | 65 STM3511     | 100   |
| 3401714 atgattacgar+ | STM3236 | 100 | STM3260 | 60.952 STM3236 | 100   |
| 1984963 atgaaacc-    | STM1889 | 100 | STM2068 | 58.491 STM1889 | 100   |
| 1491026 atgaaggttc+  | STM1409 | 100 | STM2871 | 55.769 STM1409 | 100   |
| 786061 ttgatgaagt+   | STM0720 | 100 | STM2746 | 55.34 STM0720  | 100   |
| 879651 atgaagtggc+   | STM0814 | 100 | STM0659 | 59.804 STM0814 | 100   |
| 932913 atgcactttga-  | STM0859 | 100 | STM2996 | 62.264 STM0859 | 100   |
| 1153912 atgtcattaat+ | STM1062 | 100 | STM0838 | 70 STM1062     | 100   |
| 825463 atgatggaatl-  | STM0761 | 100 | STM1486 | 59.615 STM0761 | 100   |
| 874093 atggacagat+   | STM0807 | 100 | STM0808 | 57.843 STM0807 | 100   |
| 926696 atgcaaactg+   | STM0854 | 100 | STM0855 | 83 STM0854     | 100   |
| 1469417 atggctaattt- | STM1383 | 100 | STM4305 | 68 STM1383     | 100   |
| 3397504 atggcggact+  | STM3230 | 100 | STM1492 | 88 STM3230     | 100   |
| 4624870 atgagtaaag-  | STM4382 | 100 | STM2791 | 61.165 STM4382 | 100   |

|         |                 |         |        |          |        |         |       |
|---------|-----------------|---------|--------|----------|--------|---------|-------|
| 1963379 | atgaaacacç +    | STM1867 | 100    | STM2585A | 100    | STM1867 | 100   |
| 1483337 | atgacaacttt +   | STM1396 | 100    | STM0670  | 52.475 | STM1396 | 100   |
| 433517  | atgcgtttggc +   | STM0379 | 100    | STM3166  | 54     | STM0379 | 100   |
| 2502024 | atgagtaaat(-    | STM2390 | 100    | STM2485  | 60.194 | STM2390 | 100   |
| 3621113 | gtgaagaaa(-     | STM3471 | 100    | STM2377  | 26     | STM3471 | 100   |
| 2102968 | atgaaaaaa(-     | STM2022 | 100    | STM0880  | 61.905 | STM2022 | 100   |
| 485311  | atgacttcgçç +   | STM0431 | 100    | STM2204  | 58.491 | STM0431 | 100   |
| 4631462 | atggcacgttç +   | STM4393 | 100    | STM0437  | 61.165 | STM4393 | 100   |
| 3592019 | atgaaagca(-     | STM3432 | 100    |          |        | STM3432 | 100   |
| 4691690 | atggccacgç +    | STM4449 | 100    | STM3925  | 60     | STM4449 | 100   |
| 392349  | atgaaaaagç +    | STM0349 | 100    |          |        | STM0349 | 100   |
| 3257886 | atgatcaagc +    | STM3095 | 100    | STM4154  | 61.321 | STM3095 | 100   |
| 1248441 | atgcgattga(-    | STM1162 | 100    | STM1019  | 64.078 | STM1162 | 100   |
| 3048407 | ctggaaaaagç(-   | STM2906 | 100    | STM0487  | 61.538 | STM2906 | 100   |
| 4007463 | ggaatcttattç +  | STM3806 | 100    | STM0117  | 58.416 | STM3806 | 100   |
| 4435578 | atgaaatatal(-   | STM4214 | 100    | STM2263  | 59.223 | STM4214 | 100   |
| 3613916 | ctggcagggçç +   | STM3463 | 100    | STM4006  | 59     | STM3463 | 100   |
| 503833  | atgtcatacaçç +  | STM0448 | 100    | STM0912  | 59.804 | STM0448 | 100   |
| 1331044 | ttgtctcgtaaç(-  | STM1243 | 100    | STM1996  | 61     | STM1243 | 100   |
| 1370443 | gtgagcacgt +    | STM1291 | 100    | STM3499  | 60     | STM1291 | 100   |
| 1371771 | atgacaaacc(-    | STM1293 | 100    |          |        | STM1293 | 100   |
| 4813097 | atgaacacgçç +   | STM4558 | 100    | STM4557  | 74     | STM4558 | 100   |
| 4097542 | ttggctactatçç + | STM3886 | 100    | STM1430  | 68     | STM3886 | 100   |
| 1968649 | atgaaaaaa(-     | STM1873 | 100    | STM1112  | 86     | STM1873 | 100   |
| 4516005 | atgaaattttttç + | STM4276 | 100    |          |        | STM4276 | 100   |
| 793876  | atgccctggcç +   | STM0727 | 100    |          |        | STM0727 | 100   |
| 2257266 | atgcgcgtag +    | STM2161 | 100    | STM4410  | 49.505 | STM2161 | 100   |
| 2440045 | gtgcccattççç(-  | STM2329 | 100    | STM1541  | 58     | STM2329 | 100   |
| 1909739 | atgaacagççç(-   | STM1809 | 100    | STM4007  | 54.455 | STM1809 | 100   |
| P49104  | gtggataataçç +  | PSLT057 | 100    |          |        | PSLT057 | 100   |
| P86566  | atgagctttaaçç + | PSLT104 | 100    | STM0960  | 73.148 | PSLT104 | 100   |
| P55216  | atgacagacççç +  | PSLT067 | 100    | STM4074  | 73.077 | PSLT067 | 100   |
| P87285  | atggcgggtatçç + | PSLT105 | 100    | PSLT106  | 100    | PSLT105 | 100   |
| P35180  | gtgaagtactçç(-  | PSLT043 | 100    | PSLT044  | 96     | PSLT043 | 100   |
| P77436  | atgcgaaaaççç +  | PSLT097 | 100    | STM0347  | 62.5   | PSLT097 | 100   |
| R22020  | +               | STM3981 | 48.515 |          |        | STM3981 | 13.24 |
| R22546  | +               | STM1175 | 59.259 |          |        | STM1175 | 27.04 |
| R32462  | +               | STM0765 | 58.416 | STM1761  | 56.436 | STM0765 | 9.99  |
| R12447  | +               |         |        |          |        |         |       |
| R7453   | +               | STM3861 | 60.784 | STM1962  | 60.185 | STM1962 | 4.14  |
| R44852  | +               | PSLT031 | 82     | PSLT021  | 74     | PSLT031 | 45.74 |
|         |                 | STM2560 | 100    | STM0710  | 84     | STM2560 | 100   |
| 765577  | atgtcagaatt(-   | STM0701 | 100    | STM3114  | 79     | STM0701 | 100   |
|         |                 | STM2597 | 100    | STM0916  | 78     | STM2597 | 100   |
|         |                 | STM0828 | 100    | STM1218  | 84.466 | STM0828 | 100   |
|         |                 | STM0854 | 100    | STM0159  | 62.963 | STM0854 | 100   |
|         |                 | STM0863 | 100    | STM0637  | 73     | STM0863 | 100   |
|         |                 | STM0380 | 63.964 | STM4305  | 54     | STM0380 | 18.9  |
|         |                 | STM3467 | 24     |          |        | STM3467 | 10.53 |
|         |                 | STM3008 | 45.545 |          |        | STM3008 | 20.64 |
|         |                 | STM2697 | 92     | STM2326  | 63.107 | STM2697 | 46.1  |

|         |               |         |                |        |         |       |
|---------|---------------|---------|----------------|--------|---------|-------|
|         | STM3622       | 63.725  | PSLT036        | 62.136 | PSLT036 | 32.57 |
|         | STM2357       | 62      | STM2547        | 57.143 | STM2547 | 49.13 |
|         | STM2132       | 98      | STM0107        | 50     | STM2132 | 76.28 |
|         | STM2479       | 100     | STM3331        | 80     | STM2479 | 56.32 |
|         | STM2699       | 90      | STM3483        | 59.615 | STM2699 | 86.5  |
|         | STM2912       | 64      | STM0952        | 61     | STM2912 | 47.16 |
|         | STM2762       | 57.843  |                |        | STM2762 | 13.74 |
|         | STM1995       | 100     | STM1473        | 88     | STM1995 | 47.55 |
|         | STM4537       | 61.818  | PSLT101        | 58.416 | PSLT101 | 20.85 |
|         | STM2730       | 57.143  |                |        | STM2730 | 13.84 |
|         | STM2940       | 75      | STM1791        | 63.366 | STM2940 | 43.48 |
|         | STM3203       | 58.416  |                |        | STM3203 | 12.99 |
|         | STM4217       | 79      |                |        | STM4217 | 46.4  |
|         | STM2803       | 66.019  | STM1345        | 60.952 | STM2803 | 18.51 |
|         | STM3690       | 100     | STM0618        | 90     | STM3690 | 96.5  |
|         | STM4127       | 60.377  |                |        | STM4127 | 26.99 |
|         | STM0912       | 61.165  | STM2221        | 58     | STM2844 | 21.03 |
|         | STM2711       | 99      | STM3683        | 60.784 | STM2711 | 96.2  |
|         | STM2514       | 62.385  | STM2461        | 61.765 | STM2514 | 4.26  |
|         | STM4385       | 63.208  | STM4410        | 61     | STM4410 | 11.05 |
|         | STM1333       | 56.19   | STM1534        | 49     | STM1333 | 20.36 |
| 2858932 | gtgaacaaa-    | STM2712 | 100 STM1651    | 59     | STM2712 | 98.6  |
|         |               | STM3485 | 48.077         |        | STM3485 | 20.48 |
|         |               | STM2721 | 100 STM3375    | 63.366 | STM2721 | 96.5  |
|         |               | STM4500 | 87 STM4512     | 77     | STM4500 | 79.49 |
|         |               | STM4460 | 61             |        | STM4460 | 17.11 |
|         |               | STM2058 | 49.505 STM3053 | 35.644 | STM2058 | 11.87 |
|         |               | STM0814 | 64.423 STM3709 | 59.434 | STM3709 | 25.27 |
| 211411  | atgattcgca-   | STM0180 | 100 STM2514    | 65.714 | STM0180 | 100   |
| 285404  | atgctgtctt-   | STM0244 | 100 STM3054    | 60.377 | STM0244 | 100   |
| 1607533 | atgaaaaaa+    | STM1530 | 100 STM0320    | 76     | STM1530 | 100   |
| 1815717 | atgagtgatg+   | STM1718 | 100 STM3913    | 63.462 | STM1718 | 100   |
| 4062490 | atggctacgc-   | STM3855 | 100 STM0932    | 67.619 | STM3855 | 100   |
| 4098935 | atgaccagca-   | STM3887 | 100 STM2129    | 71     | STM3887 | 100   |
| 4837041 | gtgtcatcgt+   | STM4580 | 100 STM3119    | 63.107 | STM4580 | 100   |
| 2106002 | gtgaatgagg-   | STM2026 | 100 STM1230    | 61.165 | STM2026 | 100   |
| 3602709 | atggcaaca-    | STM3448 | 100 STM2074    | 63     | STM3448 | 100   |
| 2562104 | atgaaacc+c    | STM2451 | 100 STM3199    | 61.165 | STM2451 | 100   |
| 3484362 | atggcaacat+   | STM3319 | 100 STM0817    | 71.287 | STM3319 | 100   |
| 3526556 | tgaaaaag-     | STM3358 | 100 STM0817    | 74     | STM3358 | 100   |
| 158627  | atggtcgcgg+   | STM0135 | 100 STM3878    | 72.816 | STM0135 | 86.14 |
| 198142  | atgttacgcc+   | STM0168 | 100 STM0778    | 62.5   | STM0168 | 100   |
| 217734  | atgctatttca-  | STM0187 | 100 STM0498    | 64.356 | STM0187 | 100   |
| 262347  | atgctgagtat+  | STM0223 | 100 STM4294    | 64.706 | STM0223 | 100   |
| 1585523 | atgacacaa-    | STM1507 | 100 STM0212    | 60.577 | STM1507 | 100   |
| 1613798 | atggcatatc-   | STM1538 | 100 STM1787    | 80     | STM1538 | 100   |
| 720335  | atgaaaacct+   | STM0656 | 100 STM0658    | 78     | STM0656 | 100   |
|         |               | STM0701 | 100 STM3114    | 86     | STM0701 | 100   |
| 4797463 | atgatttctgat+ | STM4538 | 100 STM0574    | 72     | STM4538 | 100   |

|                        |         |     |         |        |         |       |
|------------------------|---------|-----|---------|--------|---------|-------|
| 2232994 atgtattcaag -  | STM2138 | 100 | STM2088 | 60.577 | STM2138 | 100   |
| 2873545 atgagcaccæ -   | STM2730 | 100 | STM3484 | 76     | STM2730 | 100   |
| 2895749 atgaaacagr -   | STM2757 | 100 | STM0088 | 64.356 | STM2757 | 100   |
| 4834192 atgcctaaca +   | STM4578 | 100 | STM2197 | 82     | STM4578 | 100   |
| 301290 atgaaggca: -    | STM0260 | 100 | STM1372 | 66.346 | STM0260 | 100   |
| 355859 atgtaccagg +    | STM0310 | 100 | STM3266 | 62.727 | STM0310 | 100   |
| 377628 atgaaaacg: +    | STM0333 | 100 | STM0334 | 74     | STM0333 | 97.87 |
| 1163705 atgagagca: +   | STM1072 | 100 | STM3909 | 62.376 | STM1072 | 100   |
| 1570318 atggatacga -   | STM1492 | 100 | STM1494 | 67.327 | STM1492 | 100   |
| 371062 gtggtaatttt: +  | STM0327 | 100 | STM3028 | 54     | STM0327 | 100   |
| 1148679 atgcgaatta: +  | STM1059 | 100 | STM0168 | 63.303 | STM1059 | 100   |
| 1530507 atgctgaaaa -   | STM1455 | 100 | STM4193 | 91     | STM1455 | 100   |
| 1227403 atgaatgagti +  | STM1137 | 100 | STM4122 | 63.462 | STM1137 | 100   |
| 1275075 atgccccgtci -  | STM1189 | 100 | STM3687 | 64.22  | STM1189 | 100   |
| 1298747 atgttaacaæ -   | STM1215 | 100 | STM1375 | 70     | STM1215 | 100   |
| 1534929 atgactgatta -  | STM1459 | 100 | STM3581 | 62.963 | STM1459 | 100   |
| 3588858 atggataaga -   | STM3424 | 100 | STM0268 | 63     | STM3424 | 100   |
| 3619673 atggcaactg -   | STM3468 | 100 | STM1303 | 82     | STM3468 | 100   |
| 3664117 atgcaattca: +  | STM3505 | 100 | STM1708 | 60.952 | STM3505 | 100   |
|                        | STM3530 | 100 | STM2274 | 62     | STM3530 | 100   |
| 3728304 atgaccctac -   | STM3558 | 100 |         |        | STM3558 | 100   |
| 1079524 atgagtgaa: +   | STM0992 | 100 | STM0106 | 63.107 | STM0992 | 100   |
| 4266210 atgaagcaæ -    | STM4054 | 100 | STM3169 | 92     | STM4054 | 100   |
| 4318333 atgaaagtaa +   | STM4104 | 100 | STM0033 | 77     | STM4104 | 100   |
| 4346589 atgaaacagi +   | STM4128 | 100 |         |        | STM4128 | 100   |
| 3048146 atgatgtttac: + | STM2905 | 100 |         |        | STM2905 | 100   |
| 3080832 atgagccaat -   | STM2940 | 100 |         |        | STM2940 | 100   |
| 4333148 atgtatcacg: -  | STM4117 | 100 | STM4048 | 68     | STM4117 | 100   |
| 3010806 atgatatttcg -  | STM2865 | 100 | STM3323 | 59.223 | STM2865 | 100   |
| 3063011 atggagttac: -  | STM2920 | 100 |         |        | STM2920 | 100   |
| 2504518 atgaagcttc: -  | STM2392 | 100 | STM3587 | 66.667 | STM2392 | 100   |
| 978255 atgaaatctgtt: + | STM0908 | 100 | STM1029 | 96     | STM0908 | 100   |
| 2607763 atgctcgaaa -   | STM2493 | 100 | STM1108 | 86     | STM2493 | 100   |
| 4406829 atgccgcgtg +   | STM4185 | 100 | STM0395 | 62.5   | STM4185 | 100   |
| 4310873 atgacgcgta +   | STM4100 | 100 | STM3161 | 66     | STM4100 | 100   |
| 4339424 atgaaaaac: -   | STM4120 | 100 | STM2483 | 60.194 | STM4120 | 100   |
| 3067682 atgagcgcg: -   | STM2925 | 100 | STM3038 | 76     | STM2925 | 100   |
| 2492904 atgaacaata -   | STM2381 | 100 | STM3748 | 60.396 | STM2381 | 100   |
| 2557390 atgggtaaac -   | STM2445 | 100 | STM2946 | 62.963 | STM2445 | 100   |
| 2343251 atgcccttca -   | STM2241 | 100 | STM1051 | 99     | STM2241 | 100   |
| 1187946 atgcatgattc -  | STM1100 | 100 |         |        | STM1100 | 100   |
| 1380869 atgataaaaa -   | STM1301 | 100 | STM0137 | 75     | STM1301 | 100   |
| 4595342 atgagtgccg +   | STM4350 | 100 |         |        | STM4350 | 100   |
| 4628089 atgtcattacc +  | STM4386 | 100 | STM3675 | 67     | STM4386 | 100   |
| 4675819 atgaaaaca: +   | STM4431 | 100 | STM0517 | 59.048 | STM4431 | 100   |
| 2359164 atgcgacta -    | STM2260 | 100 | STM1115 | 58.095 | STM2260 | 100   |
| 4727938 atgaacgatc -   | STM4483 | 100 | STM1195 | 63.725 | STM4483 | 100   |
| 4755572 atgatgatgg: -  | STM4500 | 100 | STM4004 | 61.765 | STM4500 | 100   |
| 4791743 atgttaaagc: +  | STM4533 | 100 | STM1919 | 91     | STM4533 | 100   |
| 1307596 atgcagtcgc +   | STM1221 | 100 | STM3491 | 69.903 | STM1221 | 100   |
| 1516571 atgaagcgat +   | STM1440 | 100 | STM1044 | 68.317 | STM1440 | 100   |
| 1234975 atgaagaaa: +   | STM1147 | 100 | STM1148 | 100    | STM1148 | 83.76 |

|                         |         |     |         |        |         |       |
|-------------------------|---------|-----|---------|--------|---------|-------|
| 3597377 atgtttgtgcc +   | STM3442 | 100 | STM3492 | 87     | STM3442 | 100   |
| 2578502 atgaaacgta -    | STM2469 | 100 | STM2056 | 62     | STM2469 | 100   |
| 1309528 atgatcggtcç -   | STM1223 | 100 | STM1225 | 65.347 | STM1223 | 100   |
| 1406022 atggtagctat -   | STM1326 | 100 | STM2205 | 68     | STM1326 | 100   |
| 4614860 atggcatgga +    | STM4370 | 100 |         |        | STM4370 | 100   |
| 1313166 atgggacagç -    | STM1226 | 100 | STM0878 | 85     | STM1226 | 100   |
| 25011 atgaaaaagç +      | STM0021 | 100 | STM0543 | 77     | STM0021 | 100   |
| 1376652 atgagcgagç +    | STM1297 | 100 |         |        | STM1297 | 99.43 |
| 1414969 atgcaaaaç +     | STM1335 | 100 | STM1132 | 52.941 | STM1335 | 100   |
| 1507923 atgtggtcggç +   | STM1429 | 100 | STM3235 | 67     | STM1429 | 100   |
| 3729367 atggaaaaç -     | STM3560 | 100 | STM0891 | 70     | STM3560 | 100   |
| 132167 atgtcgaaga -     | STM0112 | 100 | STM3732 | 66.346 | STM0112 | 100   |
| 752675 atggcacaç -      | STM0689 | 100 | STM2654 | 82.075 | STM0689 | 100   |
| 4453437 atgatgattac +   | STM4231 | 100 |         |        | STM4231 | 100   |
| 4094562 atgacaaccç +    | STM3883 | 100 | STM2320 | 62.136 | STM3883 | 100   |
| 240082 atgaaaacaç +     | STM0203 | 100 | STM1490 | 61     | STM0203 | 100   |
| 510539 atgatggaca +     | STM0452 | 100 | STM0139 | 64.706 | STM0452 | 100   |
| 459466 atgaattttctç -   | STM0403 | 100 | STM1178 | 62.745 | STM0403 | 100   |
| 4463872 gtgaacaaaç +    | STM4242 | 100 | STM4238 | 58     | STM4242 | 100   |
| 2485771 atgacagcaç -    | STM2372 | 100 | STM4428 | 75     | STM2372 | 100   |
| 1404596 atgtggcaag -    | STM1324 | 100 | STM2858 | 63.725 | STM1324 | 100   |
| 1436627 atgtatcagçç +   | STM1355 | 100 | STM0972 | 59     | STM1355 | 100   |
| 1549523 atgctaataç -    | STM1472 | 100 | STM1372 | 71     | STM1472 | 100   |
| 2157815 atgacagtgg -    | STM2079 | 100 | STM1114 | 60.748 | STM2079 | 100   |
| 4059197 atgagggggaç -   | STM3851 | 100 | STM4268 | 65     | STM3851 | 100   |
| 260113 atgtgtctgçç +    | STM0221 | 100 | STM1473 | 61.165 | STM0221 | 100   |
| 2135286 gtgçgtgççç -    | STM2060 | 100 |         |        | STM2060 | 100   |
| 147397 atgttagtttgç +   | STM0125 | 100 | STM3279 | 62.376 | STM0125 | 100   |
| 2475853 atgtgçggtat -   | STM2362 | 100 | STM0125 | 54     | STM2362 | 100   |
| 3736781 atgacaaaçç -    | STM3568 | 100 | STM3211 | 67     | STM3568 | 100   |
| 3451382 ttgcttaatccçç - | STM3282 | 100 | STM0981 | 62     | STM3282 | 100   |
| 2693485 atggcattgçç -   | STM2554 | 100 | STM0618 | 58.252 | STM2554 | 100   |
| 1109013 atgaattacgçç +  | STM1018 | 100 | STM2622 | 100    | STM1018 | 100   |
| 266430 atgçcctcaat +    | STM0226 | 100 | STM0472 | 61     | STM0226 | 100   |
| 2746280 atggaccagçç -   | STM1041 | 100 | STM2594 | 100    | STM2594 | 100   |
| 3929336 atgaactgtçç -   | STM3736 | 100 | STM0115 | 60.194 | STM3736 | 100   |
| 3812323 atggçggtattçç - | STM3627 | 100 | STM0848 | 81     | STM3627 | 100   |
| 3723499 atgagtaactçç -  | STM3553 | 100 | STM2282 | 71     | STM3553 | 100   |
| 3936181 ttgtatctgttgç + | STM3742 | 100 | STM2956 | 71     | STM3742 | 100   |
| 2458402 atgtcgataçç +   | STM2345 | 100 | STM3543 | 65     | STM2345 | 100   |
| 2698175 atgcagcaçç +    | STM2557 | 100 |         |        | STM2557 | 100   |
| 2550968 atgaaaaagçç +   | STM2438 | 100 | STM0484 | 63.107 | STM2438 | 100   |
| 897010 atgaagtçççç -    | STM0830 | 100 | STM2354 | 60.194 | STM0830 | 100   |
| 640796 atggçgçççç -     | STM0583 | 100 | STM0768 | 67     | STM0583 | 100   |
| 4708270 atggttatttca -  | STM4465 | 100 | STM4469 | 83     | STM4465 | 100   |
| 2784237 atgactgtaaç +   | STM2643 | 100 | STM0820 | 73.267 | STM2643 | 100   |
| 3358504 atgaatcaga -    | STM3195 | 100 | STM4044 | 59.406 | STM3195 | 100   |
| 4470496 gtgtttcaaaa +   | STM4248 | 100 | STM0998 | 67.327 | STM4248 | 100   |
| 2688308 atgtcacattgç +  | STM2549 | 100 | STM3073 | 62.745 | STM2549 | 100   |
| 2150514 atgttagacaçç +  | STM2071 | 100 | STM3870 | 60.577 | STM2071 | 100   |
| 610888 atgaaacçççç -    | STM0549 | 100 | STM2246 | 59.434 | STM0549 | 100   |
| 4237348 atgçççççççç +   | STM4026 | 100 | STM2164 | 59.804 | STM4026 | 100   |



|                        |         |     |         |        |         |       |
|------------------------|---------|-----|---------|--------|---------|-------|
| 952523 atgaataactt +   | STM0880 | 100 | STM3355 | 68     | STM0880 | 100   |
| 776199 atgcccaccc +    | STM0709 | 100 | STM2253 | 60.55  | STM0709 | 100   |
| 4278958 atgcacgttg +   | STM4067 | 100 | STM2976 | 73.786 | STM4067 | 100   |
| 741645 atgacatca -     | STM0681 | 100 |         |        | STM0681 | 100   |
| 794716 atgcctgaag +    | STM0728 | 100 | STM2183 | 58.095 | STM0728 | 100   |
| 4319418 atgagcttttt +  | STM4105 | 100 | STM2076 | 73.333 | STM4105 | 100   |
| 4504838 atggaaaaa +    | STM4266 | 100 |         |        | STM4266 | 100   |
|                        | STM4261 | 100 | STM4264 | 61.905 | STM4261 | 100   |
| 2696449 atgcttgacg +   | STM2556 | 100 | STM3207 | 64.348 | STM2556 | 100   |
| 183004 atgaaactttt +   | STM0155 | 100 |         |        | STM0155 | 100   |
| 4382386 atgtctacaac -  | STM4164 | 100 | STM0217 | 58     | STM4164 | 100   |
| 4234660 atggcagttat -  | STM4023 | 100 | STM3248 | 64.423 | STM4023 | 100   |
| 4280005 atgctgctctg +  | STM4069 | 100 | STM0163 | 31     | STM4069 | 100   |
| 3023702 atgctaaagt -   | STM2878 | 100 | STM0570 | 57.843 | STM2878 | 100   |
| 1277232 ttgacacgtct +  | STM1192 | 100 |         |        | STM1192 | 100   |
| 1796280 atgttcagga +   | STM1702 | 100 | STM4368 | 60     | STM1702 | 100   |
| 2806527 atggcacacaac - | STM2662 | 100 | STM0095 | 67     | STM2662 | 100   |
| 58746 atgcagatcc +     | STM0049 | 100 | STM4471 | 60.396 | STM0049 | 100   |
| 1112989 atgaaaatgc +   | STM1024 | 100 | STM2138 | 57     | STM1024 | 100   |
| 3977325 atgcgatacc +   | STM3775 | 100 | STM3616 | 48     | STM3775 | 100   |
| 1491592 gtgttgcaact +  | STM1410 | 100 | STM4492 | 61.165 | STM1410 | 100   |
| 1826333 atgaatatca +   | STM1729 | 100 | STM1729 | 63.366 | STM1729 | 100   |
| 2868826 atgagatcgc -   | STM2725 | 100 | STM2724 | 62     | STM2725 | 65.24 |
| 473495 atgaccatttt +   | STM0420 | 100 | PSLT108 | 61.165 | STM0420 | 99.42 |
| 1754178 atgctgagatt +  | STM1659 | 100 | STM2265 | 62     | STM1659 | 100   |
| 1855255 atgctgttttca - | STM1760 | 100 | STM2007 | 65     | STM1760 | 100   |
| 1923115 gtggatacca +   | STM1825 | 100 | STM1825 | 58.252 | STM1825 | 100   |
| 1866721 atgaataatca +  | STM1767 | 100 | STM2246 | 69.307 | STM1767 | 100   |
| 3152534 atgccccgca -   | STM2995 | 100 | STM1213 | 68.317 | STM2995 | 100   |
| 3071455 atggcagcca -   | STM2930 | 100 | STM3274 | 53.333 | STM2930 | 100   |
| 3062588 ttgatacctac +  | STM2919 | 100 | STM0864 | 62.5   | STM2919 | 100   |
| 1202451 atgatgattttg + | STM1114 | 100 | STM2981 | 58     | STM1114 | 100   |
| 102272 atggcaactta -   | STM0088 | 100 | STM0945 | 78.218 | STM0088 | 100   |
| 4140805 atggcagag +    | STM3930 | 100 | STM0400 | 76     | STM3930 | 100   |
| 4123308 atgaattccac -  | STM3913 | 100 | STM2502 | 68.317 | STM3913 | 100   |
| 4365158 atggctttaa +   | STM4151 | 100 | STM2851 | 59.406 | STM4151 | 100   |
| 1913630 atggcacgca +   | STM1815 | 100 | STM0988 | 59     | STM1815 | 100   |
| 1937459 atgctgttgat +  | STM1841 | 100 |         |        | STM1841 | 100   |
| 2017157 atgaccggtta -  | STM1920 | 100 | STM1364 | 61.538 | STM1920 | 100   |
| 4414685 atggaactgc -   | STM4190 | 100 | STM4517 | 87.129 | STM4190 | 100   |
| 486130 atgatgaacc +    | STM0432 | 100 | STM2485 | 61.682 | STM0432 | 100   |
| 4253810 atgatccgca -   | STM4043 | 100 | STM2941 | 61.538 | STM4043 | 100   |
| 4169513 atgatcgaaa -   | STM3963 | 100 | STM3964 | 100    | STM3964 | 100   |
| 673711 atggattcaat +   | STM0610 | 100 | STM1216 | 60.396 | STM0610 | 100   |
| 1829273 atgagcgttct +  | STM1733 | 100 | STM3059 | 65.385 | STM1733 | 100   |
| 1664428 atgagtaaacc +  | STM1577 | 100 | STM1764 | 91     | STM1577 | 100   |
| 1699958 atgcgtaatac -  | STM1609 | 100 | STM0395 | 66.667 | STM1609 | 100   |
| 1722519 atgccattgac +  | STM1631 | 100 | STM2072 | 64.486 | STM1631 | 100   |
| 1764102 ttgtacttcaa -  | STM1670 | 100 |         |        | STM1670 | 100   |
| 533612 atgaacaaa -     | STM0476 | 100 | STM3390 | 84     | STM0476 | 100   |
| 1619606 atgaaaaga -    | STM1543 | 100 | STM2962 | 67     | STM1543 | 100   |
| 1605100 atgacagtgc +   | STM1527 | 100 | STM2101 | 72.549 | STM1527 | 100   |

|                         |         |             |                |       |
|-------------------------|---------|-------------|----------------|-------|
| 1064821 atgaaaaata +    | STM0979 | 100 STM3077 | 82 STM0979     | 100   |
| 679261 atgaaagcat +     | STM0615 | 100 STM2790 | 63.107 STM0615 | 100   |
| 1834691 atggaaatgg +    | STM1740 | 100 STM0621 | 61.468 STM1740 | 100   |
| 1626849 atgactataa -    | STM1550 | 100 STM4450 | 66 STM1550     | 100   |
| 1654648 atggttggtt: +   | STM1571 | 100 STM2885 | 63.889 STM1571 | 100   |
| 1695600 atgcgccagc -    | STM1604 | 100 STM2428 | 67.961 STM1604 | 100   |
| 1729552 atggatttaa: +   | STM1638 | 100 STM4293 | 56.311 STM1638 | 66.06 |
| 1992000 atggccattg: +   | STM1896 | 100 STM1712 | 56.731 STM1896 | 100   |
| 1971770 atgttcgcat +    | STM1878 | 100 STM0264 | 72 STM1878     | 100   |
| 3125652 atggcgaac: -    | STM2973 | 100 STM4044 | 69 STM2973     | 100   |
| 3182381 ttgattaagag +   | STM3021 | 100 STM4270 | 68.932 STM3021 | 100   |
| 3224511 atggcaaag: -    | STM3062 | 100 STM2370 | 65 STM3062     | 100   |
| 3256111 atgtaccgta: +   | STM3093 | 100 STM0838 | 59.615 STM3093 | 100   |
| 500751 atgatggcgg -     | STM0445 | 100 STM3984 | 68 STM0445     | 100   |
| 3749482 atgatagaaa -    | STM3581 | 100 STM4428 | 72 STM3581     | 100   |
| 3800831 atgaaaaga: -    | STM3618 | 100 STM2269 | 63 STM3618     | 100   |
| 3863971 atgcgtaatc: +   | STM3676 | 100 STM4387 | 75.248 STM3676 | 100   |
| 3899108 atgtcgtttct +   | STM3704 | 100         | STM3704        | 100   |
| 3113240 atgacaacgc -    | STM2961 | 100 STM2960 | 86 STM2961     | 100   |
| 3142609 atgtcgggag -    | STM2991 | 100 STM2450 | 69.608 STM2991 | 100   |
| 3200736 atgtctgaac: -   | STM3040 | 100 STM1901 | 69 STM3040     | 100   |
| 3758265 tgggaaaggi -    | STM3588 | 100 STM1211 | 51.485 STM3588 | 100   |
| 3134253 atgaccagcc -    | STM2981 | 100 STM1466 | 77.228 STM2981 | 100   |
| 4560352 atggatacac -    | STM4312 | 100 STM2281 | 66.019 STM4312 | 100   |
| 3939816 atgaaaaaa: -    | STM3745 | 100         | STM3745        | 100   |
| 3341457 atgcgaatttt: +  | STM3177 | 100 STM4292 | 67 STM3177     | 100   |
| 3177220 atggtctctatt -  | STM3016 | 100 STM3091 | 77 STM3016     | 100   |
| 2314230 atggtcaaatt +   | STM2214 | 100 STM1343 | 65.094 STM2214 | 100   |
| 2177495 atgaatatctt: -  | STM2096 | 100         | STM2096        | 100   |
| 2254463 atgattaaagi -   | STM2158 | 100 STM3790 | 61 STM2158     | 100   |
| 1018483 atgtcgcgga -    | STM0940 | 100 STM2781 | 64.706 STM0940 | 100   |
| 3849330 atgtttgataa: +  | STM3662 | 100         | STM3662        | 100   |
| 4562853 atgccagccc +    | STM4317 | 100 PSLT016 | 65.686 STM4317 | 100   |
| 3901367 ttgcctcagtt +   | STM3706 | 100         | STM3706        | 100   |
| 3768488 atgctcagtta +   | STM3596 | 100 STM0564 | 63.462 STM3596 | 100   |
| 3661024 atgaaaacgc +    | STM3503 | 100 STM3299 | 62.857 STM3503 | 100   |
| 3464585 atgaaactct -    | STM3295 | 100 STM3796 | 58.416 STM3295 | 100   |
| 4824931 atgaaacgtg +    | STM4569 | 100 STM3390 | 50.98 STM4569  | 100   |
| 397060 atgaaattcar -    | STM0351 | 100 STM3391 | 73 STM0351     | 100   |
| 3452988 atgagtcgctc -   | STM3284 | 100 STM0638 | 53.398 STM3284 | 100   |
| 3348366 atgcgtaaatt: -  | STM3185 | 100 STM4166 | 63.107 STM3185 | 100   |
| 3267435 atgatgcgca -    | STM3107 | 100 STM0863 | 58 STM3107     | 100   |
| 2966785 atgccattatt: -  | STM2817 | 100 STM4323 | 60.377 STM2817 | 100   |
| 2278320 atgagtaagt +    | STM2181 | 100 STM4538 | 55.34 STM2181  | 100   |
| 2322092 gtgaatacatt -   | STM2220 | 100 STM2220 | 63.107 STM2220 | 100   |
| 2324396 atgcgacttg: -   | STM2222 | 100 STM3616 | 63 STM2222     | 100   |
| 2249574 atgaacgaa: -    | STM2154 | 100 STM2341 | 62.617 STM2154 | 100   |
| 2523658 atgttcaggtc +   | STM2407 | 100 STM0189 | 64 STM2407     | 100   |
| 3589401 atgtctcgtgtt -  | STM3425 | 100 STM0136 | 68.627 STM3425 | 100   |
| 3621794 atgtctcaaatt: - | STM3472 | 100 STM0536 | 71 STM3472     | 100   |
| 4607710 atggcgtgga +    | STM4363 | 100         | STM4363        | 100   |
| 3961227 atgaataatc: -   | STM3762 | 100 STM1770 | 38 STM3762     | 100   |

|         |               |         |        |         |        |         |       |
|---------|---------------|---------|--------|---------|--------|---------|-------|
| 3319464 | atgtctcatctc+ | STM3157 | 100    | STM2838 | 64.762 | STM3157 | 100   |
| 3222056 | atgtctgcac+   | STM3060 | 100    | STM3120 | 60     | STM3060 | 100   |
| 847137  | atgatactga+   | STM0782 | 100    | STM0880 | 65.455 | STM0782 | 100   |
| 890306  | atggattatcg+  | STM0822 | 100    | STM1340 | 60.748 | STM0822 | 100   |
| 2820826 | atgggtgcat+   | STM2679 | 100    |         |        | STM2679 | 100   |
| 2160767 | atgtccaagc-   | STM2081 | 100    | STM1156 | 64.151 | STM2081 | 100   |
| 838379  | gtgctaaatg:-  | STM0773 | 100    | STM4556 | 52.427 | STM0773 | 100   |
| 883694  | atgagtgagc-   | STM0817 | 100    | STM3586 | 77     | STM0817 | 100   |
| 935253  | atgattacgct-  | STM0862 | 100    | STM2176 | 61     | STM0862 | 100   |
| 3480948 | atgcttttagc+  | STM3314 | 100    | STM0663 | 64.151 | STM3314 | 100   |
| 3390917 | atgtctcac+    | STM3222 | 100    | STM2184 | 66     | STM3222 | 100   |
| 4560575 | gtggtaggca-   | STM4313 | 100    | STM4261 | 67.619 | STM4313 | 100   |
| 415951  | atgaaaactg+   | STM0366 | 100    | STM1546 | 59.091 | STM0366 | 100   |
| 2721950 | atggcgctgtt+  | STM2576 | 100    | STM2848 | 56     | STM2576 | 100   |
| 2775609 | atgagcaaa+    | STM2635 | 100    | STM3064 | 60     | STM2635 | 100   |
| 4703957 | atgacacac-    | STM4459 | 100    | STM0107 | 56.311 | STM4459 | 100   |
| 645216  | atgaaagag+    | STM0586 | 100    | STM2775 | 68.317 | STM0586 | 100   |
| 4340517 | atgttgaatac+  | STM4121 | 100    | STM3641 | 61.386 | STM4121 | 100   |
| 4608993 | atgaattcaa+   | STM4365 | 100    | STM3959 | 63.366 | STM4365 | 100   |
| 1474032 | atgacaaaa+    | STM1388 | 100    |         |        | STM1388 | 100   |
| 3556236 | atgcgcatcg+   | STM3384 | 100    | STM2174 | 67.308 | STM3384 | 100   |
| 4419837 | atgagcaaaa-   | STM4198 | 100    | STM4438 | 89     | STM4198 | 100   |
| 4471941 | atgtggtatca+  | STM4250 | 100    | STM0834 | 67     | STM4250 | 100   |
| 2875787 | atgttgattat:- | STM2736 | 100    | STM2378 | 66.337 | STM2736 | 100   |
| 2936013 | atgatgagcg+   | STM2787 | 100    |         |        | STM2787 | 100   |
| 4203119 | atgaaatgta+   | STM3995 | 100    | STM2968 | 62.376 | STM3995 | 100   |
| 3047622 | atgaaaacc+    | STM2904 | 100    | STM1228 | 59.048 | STM2904 | 100   |
| 4332310 | atggcagtac+   | STM4116 | 100    | STM3858 | 69.307 | STM4116 | 100   |
| 3072332 | atgcccggta-   | STM2932 | 100    | STM4328 | 60.396 | STM2932 | 100   |
| 1535750 | atgactgttca-  | STM1461 | 100    | STM4314 | 65.347 | STM1461 | 100   |
| 1581647 | atgaacaata-   | STM1503 | 100    | STM3514 | 66.019 | STM1503 | 100   |
| 2123319 | atgaataacg+   | STM2045 | 100    | STM2038 | 82     | STM2045 | 100   |
| 4631953 | atgcaagttat+  | STM4394 | 100    | STM3434 | 69     | STM4394 | 100   |
| 3598117 | atgtacgtttgt- | STM3444 | 100    | STM2271 | 58.654 | STM3444 | 100   |
| 351350  | atgaaaaact-   | STM0307 | 100    | STM1541 | 62.376 | STM0307 | 100   |
| 1912000 | ttgaggcaag-   | STM1813 | 100    | STM0767 | 91     | STM1813 | 100   |
| 1880841 | atgaaacgc-    | STM1782 | 100    |         |        | STM1782 | 100   |
| 1955426 | atggacattc-   | STM1857 | 100    |         |        | STM1857 | 100   |
| 1975175 | atgaataaaa-   | STM1881 | 100    | STM2775 | 74.038 | STM1881 | 100   |
| 1936848 | atgaacgac-    | STM1839 | 100    | STM1748 | 60.952 | STM1839 | 100   |
| 2309758 | atgtgtgggtt-  | STM2209 | 100    | STM3713 | 43     | STM2209 | 100   |
|         |               | PSLT066 | 100    | STM4256 | 81     | PSLT066 | 100   |
|         |               | PSLT023 | 100    | PSLT024 | 100    | PSLT023 | 100   |
| P63912  | atggaacac+    | PSLT079 | 100    | STM1185 | 62     | PSLT079 | 100   |
| P27903  | atgcccataa-   | PSLT038 | 100    | STM2112 | 63.889 | PSLT038 | 100   |
|         |               | PSLT058 | 100    | PSLT059 | 100    | PSLT059 | 100   |
| P86973  | atgctgaagtt-  | PSLT105 | 100    | PSLT106 | 100    | PSLT105 | 100   |
| R19993  | -             | STM0169 | 54     |         |        | STM0169 | 12.95 |
| R4487   | +             | STM3749 | 62.617 | STM4589 | 48.077 | STM3749 | 26.58 |
| R43935  | +             | STM3498 | 64.356 | STM4517 | 52     | STM3498 | 6.54  |
| R26883  | -             | STM3859 | 50.495 | STM4262 | 46.078 | STM3859 | 21.17 |
| R13481  | +             |         |        |         |        |         |       |

|         |              |         |                |                |       |
|---------|--------------|---------|----------------|----------------|-------|
| R2390   | -            | STM2371 | 61.386         | STM2371        | 23.74 |
|         |              | STM0655 | 100 STM0657    | 70 STM0655     | 100   |
| 2741503 | atggcaacg-   | STM2590 | 100 STM0923    | 80 STM2590     | 100   |
|         |              | STM0741 | 100 STM1793    | 69 STM0741     | 100   |
|         |              | STM2611 | 100 STM0689    | 49.02 STM2611  | 100   |
| 1104567 | atgaaaaatt-  | STM1010 | 100 STM2631    | 100 STM2631    | 100   |
|         |              | STM2670 | 100 STM1347    | 78 STM2670     | 100   |
|         |              | STM3603 | 60.577         | STM3603        | 7.68  |
|         |              | STM0774 | 60.185         | STM0774        | 38.65 |
|         |              | STM2712 | 90 STM2713     | 44 STM2712     | 83.1  |
|         |              | STM2555 | 76 STM0880     | 67.308 STM2555 | 52.28 |
|         |              | STM1758 | 75 STM0285     | 64.706 STM1758 | 22.72 |
|         |              | STM3911 | 98 STM0757     | 83 STM0757     | 66    |
|         |              | STM2710 | 89 STM2457     | 66.667 STM2710 | 82.6  |
|         |              | STM0866 | 37             | STM0866        | 14.87 |
|         |              | STM2188 | 60.748 STM0437 | 49.038 STM2188 | 13.97 |
|         |              | STM2732 | 75 STM2324     | 65.714 STM2732 | 71.6  |
|         |              | STM2716 | 90 STM1611     | 64.151 STM2716 | 84.3  |
|         |              | STM2694 | 78 STM1842     | 69 STM2694     | 52.09 |
|         |              | STM2996 | 63 STM4382     | 58.252 STM4382 | 31.11 |
|         |              | STM2767 | 65.347 STM4157 | 60.396 STM0721 | 18.36 |
|         |              | STM0437 | 99 STM0438     | 63 STM0437     | 97.9  |
|         |              | STM3069 | 55.882         | STM3069        | 30.19 |
|         |              | STM2778 | 97 STM2779     | 72 STM2778     | 72.41 |
|         |              | STM3822 | 64.545 STM1656 | 61.165 STM1656 | 15.27 |
|         |              | STM0291 | 73 STM0292     | 72.549 STM0291 | 48    |
|         |              | STM0437 | 62 STM0438     | 61 STM0438     | 21    |
|         |              | STM0285 | 62.376 STM1422 | 61.386 STM0634 | 14.78 |
|         |              | STM1635 | 54.902 STM2140 | 43.564 STM1635 | 8.02  |
|         |              | STM2204 | 62.376         | STM2204        | 6.62  |
|         |              | STM1386 | 64.151 STM0039 | 60.396 STM1386 | 27.14 |
|         |              | STM4518 | 100 STM3766    | 89 STM3766     | 66.02 |
|         |              | STM4458 | 65 STM2952     | 59.434 STM4458 | 44.9  |
|         |              | STM3552 | 100 STM2253    | 62.136 STM3552 | 69.34 |
|         |              | STM1150 | 57.143 STM2515 | 55.882 STM1150 | 29.14 |
|         |              | STM1885 | 64.078 STM2333 | 55 STM1885     | 11.44 |
| 223445  | atggcgggg+   | STM0190 | 100 STM3493    | 64.706 STM0190 | 100   |
| 740603  | atgtttctatt- | STM0680 | 100 STM0530    | 70 STM0680     | 100   |
| 767016  | gtgacaaac-   | STM0702 | 100 STM4292    | 66 STM0702     | 100   |
| 4036618 | atgtcgatgg+  | STM3832 | 100 STM3530    | 74.257 STM3832 | 100   |
| 2107779 | atgaataccg-  | STM2028 | 100 STM2019    | 76.238 STM2028 | 100   |
| 3990554 | atgaacacct-  | STM3789 | 100 STM2459    | 66.346 STM3789 | 100   |
| 4052340 | atgtttgaaga+ | STM3845 | 100            | STM3845        | 100   |
| 4086300 | atgaaaacc+   | STM3877 | 100 STM4281    | 63.725 STM3877 | 100   |
| 50411   | atgccatttat- | STM0041 | 100 STM2535    | 63.107 STM0041 | 100   |

|         |               |         |     |         |        |         |     |
|---------|---------------|---------|-----|---------|--------|---------|-----|
| 137559  | gtgttcggcta + | STM0116 | 100 | STM3901 | 81     | STM0116 | 100 |
| 173216  | atggataagg -  | STM0149 | 100 | STM3750 | 74     | STM0149 | 100 |
| 207625  | atgcgcaaa -   | STM0175 | 100 | STM0023 | 73     | STM0175 | 100 |
| 3492828 | atgaagcaa -   | STM3328 | 100 | STM2271 | 66     | STM3328 | 100 |
| 3535795 | atgagtctga -  | STM3368 | 100 |         |        | STM3368 | 100 |
| 693124  | atgtctaagat + | STM0629 | 100 | STM1837 | 87     | STM0629 | 100 |
| 718073  | atgaatcattc - | STM0654 | 100 | STM1760 | 64.706 | STM0654 | 100 |
| 749088  | atgagtgagc +  | STM0686 | 100 | STM3661 | 71.287 | STM0686 | 100 |
| 779463  | gtgcagcga -   | STM0712 | 100 | STM0568 | 60.784 | STM0712 | 100 |
| 284185  | atgctactac -  | STM0242 | 100 | STM0698 | 74     | STM0242 | 100 |
| 1617261 | atggagacta +  | STM1541 | 100 | STM0151 | 67     | STM1541 | 100 |
| 2197483 | atgaatattct - | STM2113 | 100 | STM2773 | 56.436 | STM2113 | 100 |
| 4848896 | atgagaaggi -  | STM4591 | 100 | STM0026 | 64     | STM4591 | 100 |
| 318536  | gtggatactg +  | STM0278 | 100 | STM1631 | 58.416 | STM0278 | 100 |
| 367418  | atgagtgaca +  | STM0321 | 100 | STM2443 | 61.765 | STM0321 | 100 |
| 2856171 | atgaatagtct - | STM2707 | 100 |         |        | STM2707 | 100 |
| 323193  | atgatgaaa +   | STM0283 | 100 | STM2397 | 53     | STM0283 | 100 |
| 2899322 | atgagtatctt + | STM2759 | 100 | STM3860 | 67     | STM2759 | 100 |
| 2929302 | atgacgatgc +  | STM2781 | 100 | STM0940 | 65.347 | STM2781 | 100 |
| 1176228 | atgctccgg -   | STM1087 | 100 | STM1026 | 85     | STM1087 | 100 |
| 1198999 | atggctaaca -  | STM1111 | 100 | STM3983 | 52     | STM1111 | 100 |
| 2911843 | atgaagatgi +  | STM0325 | 100 | STM2769 | 100    | STM2769 | 100 |
| 2946877 | atgtccattgg + | STM2798 | 100 | STM0564 | 60     | STM2798 | 100 |
| 1190973 | atgaagaaa +   | STM1102 | 100 | STM3680 | 69     | STM1102 | 100 |
| 3605689 | atgaaatcac -  | STM3453 | 100 | STM4397 | 66.346 | STM3453 | 100 |
| 3644767 | atgaaggcta -  | STM3489 | 100 | STM3488 | 86     | STM3489 | 100 |
| 1323551 | atgaaacgg -   | STM1236 | 100 | STM3822 | 57.282 | STM1236 | 100 |
| 1399973 | atgatgaaac +  | STM1319 | 100 | STM4122 | 67.308 | STM1319 | 100 |
| 1233552 | atgacatcac +  | STM1147 | 100 | STM1148 | 62     | STM1147 | 100 |
| 1281676 | gtgtctaagc +  | STM1197 | 100 | STM2378 | 73     | STM1197 | 100 |
| 1303878 | ttgtcggcctt + | STM1217 | 100 | STM2630 | 87     | STM1217 | 100 |
| 1349542 | atgactacca -  | STM1267 | 100 |         |        | STM1267 | 100 |
| 3746754 | atgagcgatc -  | STM3578 | 100 | STM0878 | 57.547 | STM3578 | 100 |
| 1116900 | gtggatcagg +  | STM1030 | 100 | STM0909 | 63.107 | STM1030 | 100 |
| 4417656 | atgctcggc -   | STM4195 | 100 | STM3486 | 63     | STM4195 | 100 |
| 4441811 | atgaaaaac +   | STM4221 | 100 | STM0417 | 65.049 | STM4221 | 100 |
| 4503982 | atgagtcaaa +  | STM4264 | 100 | STM0468 | 68     | STM4264 | 100 |
| 4542129 | atgagtacgc -  | STM4297 | 100 | STM3194 | 69.524 | STM4297 | 100 |
| 2487801 | atgaaaacgt +  | STM2376 | 100 |         |        | STM2376 | 100 |
| 4471396 | atgaaaaaa +   | STM4249 | 100 | STM0659 | 61.905 | STM4249 | 100 |
| 4525173 | atgaaactac -  | STM4284 | 100 | STM0192 | 61.386 | STM4284 | 100 |
| 4572381 | atgtcaaaca -  | STM4326 | 100 | STM1469 | 65     | STM4326 | 100 |
| 961025  | atgaaaaaa -   | STM0890 | 100 | STM0887 | 76     | STM0890 | 100 |
| 987869  | atgggcgtac +  | STM0916 | 100 | STM2597 | 90     | STM0916 | 100 |
| 1014615 | atgttttgtgt - | STM0937 | 100 |         |        | STM0937 | 100 |
| 4277908 | atgaaggcc +   | STM4066 | 100 | STM3793 | 67     | STM4066 | 100 |
| 4437122 | atgcttatca -  | STM4217 | 100 | STM2060 | 63.208 | STM4217 | 100 |
| 3046044 | atggacatcc +  | STM2902 | 100 | STM1767 | 91     | STM2902 | 100 |
| 4578259 | atggccttaac - | STM4332 | 100 |         |        | STM4332 | 100 |
| 950718  | gtgaatgatgi + | STM0878 | 100 | STM1226 | 85     | STM0878 | 100 |
|         |               | STM0911 | 100 | STM0912 | 100    | STM0911 | 100 |
| 238491  | atgagtaagti - | STM0202 | 100 | STM3218 | 67.327 | STM0202 | 100 |

|                        |         |             |                |       |
|------------------------|---------|-------------|----------------|-------|
| 420156 atgacagac:      | STM0369 | 100 STM0730 | 61.765 STM0369 | 100   |
| 1426444 atgaacaga:-    | STM1347 | 100 STM0760 | 83 STM1347     | 100   |
| 2029888 atgctgaaaa+    | STM1935 | 100 STM1932 | 70 STM1935     | 100   |
| 2076528 atggactcag-    | STM1993 | 100 STM0988 | 66 STM1993     | 100   |
| 2373593 ttgaaatacct-   | STM2271 | 100 STM2958 | 72 STM2271     | 100   |
| 4677912 atgaaaaagr+    | STM4433 | 100 STM1133 | 65.686 STM4433 | 100   |
| 2418677 gtgcattctatt-  | STM2310 | 100 STM0595 | 64 STM2310     | 100   |
| 2447599 atgtcgacac-    | STM2336 | 100         | STM2336        | 100   |
| 2132654 atgtcttacia+   | STM2057 | 100 STM3242 | 83.654 STM2057 | 100   |
| 3066486 ttgagtcaga:-   | STM2924 | 100 STM3211 | 68 STM2924     | 100   |
| 242069 atggctaagc-     | STM0206 | 100         | STM0206        | 100   |
| 2776816 atggctatttc:   | STM2636 | 100 PSLT048 | 63.725 STM2636 | 100   |
| 1420551 atgctgactttt+  | STM1340 | 100 STM0770 | 69.608 STM1340 | 99.09 |
| 1168982 atggaactga-    | STM1076 | 100         | STM1076        | 100   |
| 3012994 atggtattgcc-   | STM2867 | 100 STM4315 | 68.317 STM2867 | 100   |
| 4303206 gtgaaatcga-    | STM4094 | 100 STM0209 | 63.81 STM4094  | 100   |
| 2036361 atgcaatttaa-   | STM1945 | 100 STM3423 | 58 STM1945     | 100   |
| 3043285 atgaagaca:-    | STM2898 | 100 STM1352 | 67.308 STM2898 | 100   |
| 1509994 atgctgctcga-   | STM1431 | 100 STM4055 | 66 STM1431     | 100   |
| 1232085 atgaaactttt:   | STM1144 | 100 STM4466 | 70.755 STM1144 | 100   |
| 3921940 atgcctgaatt-   | STM3726 | 100 STM2206 | 69 STM3726     | 100   |
| 3912464 atgattattga:-  | STM3716 | 100 STM2548 | 60 STM3716     | 100   |
| 1555168 atgaagctta:-   | STM1478 | 100 STM3343 | 64 STM1478     | 100   |
| 1543929 atgtcaaaaca+   | STM1468 | 100 STM4300 | 92 STM1468     | 100   |
| 1576853 atgaaaatca-    | STM1498 | 100 STM0964 | 84 STM1498     | 100   |
| 3982237 atgcctgatta-   | STM3781 | 100         | STM3781        | 100   |
| 352488 gtgtctggtttg-   | STM0308 | 100 STM0912 | 63 STM0308     | 100   |
| 412517 atgtctccgat+    | STM0363 | 100 STM3172 | 64.762 STM0363 | 100   |
| 2095834 atgtggtttca:-  | STM2013 | 100 STM2315 | 93 STM2013     | 95.48 |
| 2145691 gtgacagtta:+   | STM2067 | 100 STM0592 | 61.386 STM2067 | 100   |
| 156834 atgtttgaacc+    | STM0133 | 100         | STM0133        | 100   |
| 2434626 atgctaattgg:-  | STM2323 | 100 STM1726 | 71 STM2323     | 100   |
| 363137 atgagcgaa:+     | STM0317 | 100 STM2545 | 61.111 STM0317 | 100   |
| 2066342 atgactcctc:    | STM1980 | 100 STM2889 | 62.745 STM1980 | 100   |
| 1564973 atgaatatcg:+   | STM1487 | 100 STM2420 | 78 STM1487     | 100   |
| 3602239 atgccacgtc-    | STM3447 | 100 STM4454 | 61.765 STM3447 | 100   |
| 4055264 atgaaacgttt+   | STM3847 | 100 STM2221 | 77.885 STM3847 | 100   |
| 440660 atgaccatctc:    | STM0387 | 100 STM3490 | 63.81 STM0387  | 100   |
| 495199 atggcaactg-     | STM0441 | 100 STM3588 | 64 STM0441     | 100   |
| 4509291 atggaaattttt+  | STM4269 | 100 STM2043 | 59.804 STM4269 | 97.34 |
| 2419599 atgattgactg-   | STM2312 | 100 STM4530 | 59.615 STM2312 | 100   |
| 3428579 atgagccaac+    | STM3258 | 100         | STM3258        | 100   |
| 4374951 atgttacaga:-   | STM4156 | 100 STM2193 | 58.824 STM4156 | 100   |
| 1464794 atgaaaattttt:- | STM1381 | 100 STM3548 | 77 STM1381     | 100   |
| 2627428 atgttatcctct+  | STM2512 | 100 STM4304 | 62.385 STM2512 | 100   |
| 561425 atgatagcga-     | STM0500 | 100 STM1567 | 61.905 STM0500 | 100   |
| 4654331 atgatgaaa-     | STM4413 | 100 STM0434 | 60.194 STM4413 | 100   |
| 3353859 atgtcagtaac+   | STM3190 | 100 STM1456 | 78.431 STM3190 | 100   |
| 3389490 atgagccaac:    | STM3220 | 100 STM3338 | 61 STM3220     | 100   |
| 3435722 atggctcaaa+    | STM3265 | 100 STM2489 | 65.347 STM3265 | 100   |
| 3461416 atgagtttatttt- | STM3291 | 100 STM2318 | 60 STM3291     | 100   |
| 1872108 atgaggtcgtt-   | STM1773 | 100 STM4322 | 66.981 STM1773 | 100   |

|                       |         |     |         |                |       |
|-----------------------|---------|-----|---------|----------------|-------|
| 2408971 atgacgaaa+    | STM2300 | 100 |         | STM2300        | 100   |
| 2559197 atgaaatcgc-   | STM2447 | 100 |         | STM2447        | 100   |
| 4714157 atgacggtac+   | STM4471 | 100 | STM0049 | 60.784 STM4471 | 100   |
| 2945129 atgaccgccc+   | STM2794 | 100 | STM0322 | 50.943 STM2794 | 100   |
| 4767265 atgcctgattc-  | STM4512 | 100 |         | STM4512        | 100   |
| 4853394 atgttaataa-   | STM4595 | 100 | STM0399 | 60.377 STM4595 | 100   |
| 3842760 atgcaaaaagt-  | STM3656 | 100 | STM2284 | 62.617 STM3656 | 100   |
| 1849952 atgacgcagc-   | STM1753 | 100 | STM1767 | 66.667 STM1753 | 100   |
| 1786289 atgattatcttc+ | STM1693 | 100 | STM3708 | 63.462 STM1693 | 100   |
| 4259901 atgaccgtac+   | STM4048 | 100 | STM4117 | 67.961 STM4048 | 100   |
| 4205743 atgacgaga-    | STM3998 | 100 | STM2253 | 61.165 STM3998 | 100   |
| 879108 atgactcaac-    | STM0813 | 100 | STM4451 | 61.765 STM0813 | 100   |
| 863782 gtgactaaac+    | STM0797 | 100 | STM2363 | 60.577 STM0797 | 100   |
| 102660 atgatcaattc-   | STM0089 | 100 | STM3708 | 66.337 STM0089 | 100   |
| 4251421 atgaccctgg+   | STM4040 | 100 | STM4039 | 68 STM4040     | 96.19 |
| 704422 tgaagctgc-     | STM0641 | 100 | STM4408 | 49.038 STM0641 | 100   |
| 302117 atgaatcttaa-   | STM0261 | 100 | STM0983 | 60 STM0261     | 100   |
| 1063917 atggaatccc+   | STM0978 | 100 | STM3054 | 52 STM0978     | 100   |
| 2466293 atgaagaagc-   | STM2355 | 100 | STM2354 | 85 STM2355     | 100   |
| 2825412 atgcbgctga+   | STM2685 | 100 | STM0866 | 61.765 STM2685 | 100   |
| 70003 atgaaaatca+     | STM0059 | 100 | STM0623 | 66.337 STM0059 | 100   |
| 411417 atggctcgcg+    | STM0362 | 100 | STM4293 | 64.356 STM0362 | 100   |
| 1951727 atgccgccttt-  | STM1854 | 100 | STM3884 | 58.879 STM1854 | 100   |
| 3765982 atgaccaatc-   | STM3594 | 100 | STM1512 | 69 STM3594     | 100   |
|                       | STM0710 | 100 | STM2560 | 84 STM0710     | 99.8  |
| 4549896 atgatcaatgt-  | STM4303 | 100 | STM2785 | 61.905 STM4303 | 100   |
| 2030173 atggattccat-  | STM1936 | 100 | STM1908 | 63.107 STM1936 | 71.43 |
| 1778930 atgagcgaac-   | STM1684 | 100 | STM2146 | 61.321 STM1684 | 100   |
| 2777793 atgattaaagc-  | STM2637 | 100 | STM3860 | 57 STM2637     | 100   |
| 1228858 atgccgcgct-   | STM1139 | 100 | STM0028 | 67 STM1139     | 100   |
| 3109275 atgaccaact+   | STM2958 | 100 | STM2271 | 72 STM2958     | 100   |
| 369379 ttgtccggac+    | STM2769 | 100 | STM0324 | 99 STM2769     | 100   |
| 4379124 atgcagattc-   | STM4161 | 100 | STM3210 | 49 STM4161     | 100   |
| 3612043 atggacgaac-   | STM3460 | 100 | STM0665 | 59.615 STM3460 | 100   |
| 3467354 atgacaggta-   | STM3297 | 100 | STM3807 | 60.194 STM3297 | 99.52 |
| 2128739 atgaatacctt+  | STM2052 | 100 | STM2461 | 72 STM2052     | 100   |
| 4518886 atgagttgca+   | STM4279 | 100 | STM4036 | 66.337 STM4279 | 100   |
| 2063530 atgactgactc+  | STM1975 | 100 | STM0096 | 69 STM1975     | 100   |
| 1591729 atgtcgacga+   | STM1512 | 100 | STM3594 | 69 STM1512     | 100   |
| 4349954 atgattaaaa+   | STM4130 | 100 | STM0585 | 67 STM4130     | 100   |
| 672819 atgctcgaca+    | STM0609 | 100 | STM4153 | 66.99 STM0609  | 100   |
| 1838551 atgatgtaagc-  | STM1744 | 100 | STM3628 | 66.667 STM1744 | 100   |
| 4282198 atggctcgac-   | STM4072 | 100 | STM2977 | 73.267 STM4072 | 100   |
| 4174605 atgacaacgc-   | STM3967 | 100 | STM1368 | 67 STM3967     | 100   |
| 4157703 atggacgtttc+  | STM3951 | 100 | STM1075 | 66.337 STM3951 | 100   |
| 98785 atgatcctcat+    | STM0085 | 100 | STM3458 | 59.223 STM0085 | 99.62 |
| 3221566 atgcttatgtct- | STM3059 | 100 | STM1733 | 65 STM3059     | 100   |
| 2059909 atgtctaataga+ | STM1971 | 100 | STM0213 | 63.303 STM1971 | 100   |
| 2544202 atgagtaaga+   | STM2430 | 100 | STM2440 | 76.238 STM2430 | 100   |
| 2546619 atgatttcagg+  | STM2432 | 100 | STM4110 | 83.168 STM2432 | 100   |
| 1815130 atgcattacc-   | STM1717 | 100 | STM3157 | 91 STM1717     | 100   |
| 3097228 atgcagtacc-   | STM2951 | 100 | STM1975 | 62.136 STM2951 | 100   |

|         |               |         |     |         |        |         |       |
|---------|---------------|---------|-----|---------|--------|---------|-------|
| 3093296 | atgtccacca +  | STM2949 | 100 | STM4541 | 71.963 | STM2949 | 100   |
| 4222974 | atgtataattc:- | STM4013 | 100 | STM0573 | 93     | STM4013 | 100   |
| 2008212 | atgcgtaaat:-  | STM1912 | 100 | STM0736 | 62.617 | STM1912 | 99.24 |
| 1751131 | gtggaagcc:-   | STM1656 | 100 | STM2494 | 54     | STM1656 | 100   |
| 1631871 | atgatgagta:-  | STM1554 | 100 | STM4491 | 50.495 | STM1554 | 100   |
| 1894856 | atgtaccacg +  | STM1795 | 100 | STM1655 | 64.762 | STM1795 | 100   |
| 1929501 | gtgaccattg: + | STM1830 | 100 | STM3771 | 64     | STM1830 | 100   |
| 1951339 | atgatgcggc -  | STM1853 | 100 | STM2907 | 67     | STM1853 | 100   |
| 1995008 | gtgaaggata -  | STM1900 | 100 | STM0994 | 60.784 | STM1900 | 100   |
| 959571  | atgcttgagta - | STM0888 | 100 | STM2352 | 86     | STM0888 | 100   |
| 582329  | atgagtgaaa +  | STM0520 | 100 | STM3776 | 63.107 | STM0520 | 100   |
| 1089596 | atgtttgagaa - | STM0998 | 100 | STM4248 | 67.327 | STM0998 | 100   |
| 650732  | atgccatctc +  | STM0589 | 100 | STM3340 | 73.077 | STM0589 | 100   |
| 383596  | atgtcccca:-   | STM0338 | 100 | STM0196 | 64.078 | STM0338 | 100   |
| 1635947 | atggattitaa + | STM1557 | 100 | STM2242 | 61.905 | STM1557 | 100   |
| 1841356 | gtgatagcaa -  | STM1746 | 100 | STM1679 | 77     | STM1746 | 100   |
| 1885946 | atgaataacg +  | STM1786 | 100 | STM1539 | 87     | STM1786 | 100   |
| 1926482 | atggcgcaa: +  | STM1827 | 100 | STM0468 | 67.327 | STM1827 | 100   |
| 1745649 | atgcaaaca: +  | STM1651 | 100 | STM3882 | 72     | STM1651 | 100   |
| 1771900 | atgaaacaat +  | STM1678 | 100 | STM2894 | 60     | STM1678 | 100   |
| 557791  | atgtttagaaa - | STM0497 | 100 |         |        | STM0497 | 100   |
| 3137161 | atgaacgcttt + | STM2984 | 100 | STM1373 | 70     | STM2984 | 100   |
|         |               | STM2703 | 100 | STM2706 | 100    | STM2703 | 100   |
| 309937  | atgaaaaaa:-   | STM0270 | 100 |         |        | STM0270 | 100   |
| 465160  | gtggcacag: +  | STM0408 | 100 | STM2758 | 62.385 | STM0408 | 100   |
| 3311665 | atgagtcag:-   | STM3148 | 100 |         |        | STM3148 | 100   |
| 2976497 | atgactgaca -  | STM2830 | 100 | STM1514 | 67     | STM2830 | 100   |
| 3820249 | atggctgttca + | STM3633 | 100 | STM2191 | 66.019 | STM3633 | 100   |
| 4799565 | ctgaacaatc +  | STM4540 | 100 | STM3601 | 61.111 | STM4540 | 100   |
| 3930291 | atgaatcgct: + | STM3737 | 100 | STM2757 | 61.765 | STM3737 | 100   |
| 3333104 | atgcgaatac +  | STM3170 | 100 | STM4053 | 82     | STM3170 | 100   |
| 3167879 | atgagtgagtr:- | STM3009 | 100 | STM1256 | 63.462 | STM3009 | 98.53 |
| 3238384 | atgtctcacç -  | STM3076 | 100 | STM2474 | 85     | STM3076 | 100   |
| 2992175 | gtgactgacg -  | STM2845 | 100 |         |        | STM2845 | 100   |
| 3835421 | atggcgacaç -  | STM3647 | 100 | STM2216 | 63.107 | STM3647 | 100   |
| 3869511 | atgacgaac:-   | STM3680 | 100 | STM1597 | 77     | STM3680 | 100   |
| 3969653 | atgacgccç:-   | STM3768 | 100 | STM4446 | 75.248 | STM3768 | 100   |
| 3132706 | atgaaagcg: +  | STM2979 | 100 | STM2414 | 61.538 | STM2979 | 100   |
| 3191830 | gtgcttcgtta - | STM3029 | 100 |         |        | STM3029 | 100   |
| 2300357 | atgggtcca:-   | STM2200 | 100 | STM3930 | 73     | STM2200 | 100   |
| 2336605 | atgcacaga:-   | STM2235 | 100 |         |        | STM2235 | 100   |
| 2309634 | atgcggggaç -  | STM2208 | 100 | STM0849 | 51     | STM2208 | 100   |
| 3925177 | atgaaaaaa: +  | STM3731 | 100 | STM1895 | 66     | STM3731 | 99.35 |
| 3593493 | atggaaacta -  | STM3435 | 100 | STM4283 | 61.538 | STM3435 | 100   |
| 4608717 | atgcgtaagtr + | STM4364 | 100 | STM0470 | 59.804 | STM4364 | 100   |
| 3583260 | atgcgccatc -  | STM3414 | 100 |         |        | STM3414 | 100   |
| 1019729 | atgctgtcta: + | STM0941 | 100 |         |        | STM0941 | 100   |
| 4610394 | atgggtaaca +  | STM4366 | 100 | STM1992 | 56.436 | STM4366 | 100   |
| 3416355 | atgaaaatcg -  | STM3247 | 100 | STM2959 | 79     | STM3247 | 100   |
| 3312641 | gtgaacaga:-   | STM3149 | 100 | STM4036 | 68     | STM3149 | 100   |
| 2979839 | atgacacggç +  | STM2833 | 100 | STM2752 | 73.267 | STM2833 | 100   |
| 4688704 | atgccttcgat + | STM4446 | 100 | STM3768 | 75.248 | STM4446 | 100   |



|         |                |         |                |                |       |
|---------|----------------|---------|----------------|----------------|-------|
| 4835658 | gtggcaaaaç +   | STM4579 | 100            | STM4579        | 100   |
| 400848  | atgagtcagtr +  | STM0353 | 100 STM0498    | 81 STM0353     | 100   |
| 2991678 | gtgttacacgç -  | STM2844 | 100            | STM2844        | 100   |
| 2308904 | atgcacaacç +   | STM2207 | 100 STM0264    | 65.766 STM2207 | 100   |
| 2172239 | atgacagcaç -   | STM2090 | 100 STM2421    | 88 STM2090     | 100   |
| 2174123 | atgaaagcç -    | STM2092 | 100 STM2092    | 61.165 STM2092 | 100   |
| 2247627 | atgaaacgtr -   | STM2152 | 100 STM2402    | 60.194 STM2152 | 100   |
| 1863941 | atgagtcactt -  | STM1765 | 100 STM1576    | 81 STM1765     | 97.49 |
| 3856637 | atgaaagtaa +   | STM3668 | 100 STM3857    | 58 STM3668     | 100   |
| 3742363 | atgctttggtç +  | STM3575 | 100 STM3478    | 51.923 STM3575 | 100   |
| 3505780 | atgactacgtr -  | STM3336 | 100 STM3681    | 65.049 STM3336 | 100   |
| 3395856 | atggaactac +   | STM3226 | 100 STM3162    | 77 STM3226     | 100   |
| 1487473 | atggtgcaag +   | STM1402 | 100 STM0724    | 61.386 STM1402 | 100   |
| 1203567 | atggcgggta +   | STM1116 | 100 STM2649    | 62.136 STM1116 | 100   |
| 858175  | atgaacaccç +   | STM0791 | 100 STM3478    | 63.107 STM0791 | 100   |
| 904817  | atgaatatga -   | STM0837 | 100 STM2015    | 79 STM0837     | 100   |
| 3219643 | atgagcgta -    | STM3057 | 100 STM0671    | 64.706 STM3057 | 100   |
| 1191826 | atgggcaagt +   | STM1103 | 100 STM3300    | 61.765 STM1103 | 100   |
| 853064  | atgccggcaac +  | STM0787 | 100 STM0787    | 60.577 STM0787 | 100   |
| 894623  | atgccggtgga -  | STM0827 | 100 STM3787    | 62.857 STM0827 | 100   |
| 1691644 | atgaagaaal -   | STM1601 | 100 STM3544    | 59 STM1601     | 100   |
| 3426631 | atgcagctç +    | STM3256 | 100 STM2206    | 80 STM3256     | 100   |
| 3350926 | atgaaacgç +    | STM3187 | 100 STM3260    | 61.765 STM3187 | 100   |
| 2578850 | atgaataaac -   | STM2470 | 100 STM2055    | 74 STM2470     | 100   |
| 2411575 | atggaatggti -  | STM2304 | 100 STM3349    | 66.981 STM2304 | 100   |
| 4072423 | atgttaaataç -  | STM3862 | 100 STM4579    | 64.078 STM3862 | 100   |
| 477658  | atgccgaagç -   | STM0424 | 100 STM2959    | 61.905 STM0424 | 100   |
| 2952102 | atgagcattar +  | STM2805 | 100 STM1032    | 61.905 STM2805 | 100   |
| 511564  | atgcaaacar +   | STM0454 | 100            | STM0454        | 100   |
| 3522091 | atgactaatgr -  | STM0766 | 100 STM3353    | 100 STM3353    | 100   |
| 3591028 | atggcagcç -    | STM3429 | 100 STM0929    | 60.396 STM3429 | 100   |
| 3591828 | atgaccgata -   | STM3431 | 100 STM0401    | 59.615 STM3431 | 100   |
| 4639502 | atgccgçgctc +  | STM4402 | 100            | STM4402        | 100   |
| 2248187 | atgaaaaaal -   | STM2153 | 100 STM2293    | 67 STM2153     | 100   |
| 2025903 | atgactccct -   | STM1930 | 100 STM0658    | 50 STM1930     | 100   |
| 1157385 | atgaaaaaal +   | STM1065 | 100            | STM1065        | 100   |
| 2794378 | gtgcgçgtgt +   | STM2653 | 100 STM3577    | 56.731 STM2653 | 100   |
| 1519685 | gtgaagtgtal -  | STM1443 | 100 STM4248    | 61.905 STM1443 | 100   |
| 2807631 | tgccgtttttta + | STM2664 | 100            | STM2664        | 100   |
| 4305975 | atgaaaaaal +   | STM4096 | 100 STM4147    | 66.667 STM4096 | 100   |
| 4548860 | atggacaata -   | STM4302 | 100 STM2063    | 56.436 STM4302 | 100   |
| 505356  | atgacagata +   | STM0449 | 100 STM0945    | 65.049 STM0449 | 100   |
| 1825740 | atggccgaac +   | STM1728 | 100 STM1513    | 84 STM1728     | 100   |
| 1351953 | atgggaaaaç +   | STM1272 | 100 STM2935    | 55 STM1272     | 100   |
| 2853404 | atgagcçgatt +  | STM2704 | 100 STM0927    | 79 STM2704     | 100   |
| 280307  | atgtcaatga -   | STM0237 | 100 STM3685    | 61.905 STM0237 | 100   |
| 17486   | atgaaaactt -   | STM0017 | 100 STM0031    | 63 STM0017     | 100   |
| 2351603 | gtgagtcçgg -   | STM2251 | 96.386 STM3816 | 96.386 STM2251 | 96.39 |
| 408649  | atgctaataç +   | STM0359 | 100            | STM0359        | 100   |
| 1180529 | atgacactcc -   | STM1093 | 100 STM3920    | 50 STM1093     | 100   |
| 3734419 | atgacggçtg +   | STM3566 | 100 STM4281    | 75.728 STM3566 | 100   |
| 1950368 | atgatgaaaç +   | STM1851 | 100 STM2791    | 50 STM1851     | 100   |

|         |              |         |        |         |        |         |       |
|---------|--------------|---------|--------|---------|--------|---------|-------|
| 1928383 | gtgatggaga-  | STM1829 | 100    | STM3698 | 57     | STM1829 | 100   |
| P68197  | atgcataaat+  | PSLT087 | 100    | STM2589 | 52.941 | PSLT087 | 100   |
| P26140  | ttggagtgcg+  | PSLT036 | 100    | STM4489 | 65     | PSLT036 | 100   |
| P71241  | gtgaagaacr+  | PSLT088 | 100    |         |        | PSLT088 | 100   |
| P29966  | atgttgatact- | PSLT039 | 100    | STM4125 | 61.905 | PSLT039 | 100   |
| P66060  | atggcgagca+  | PSLT081 | 100    | STM4417 | 74.51  | PSLT081 | 100   |
| P14087  | atgaaaaag-   | PSLT018 | 100    | STM4103 | 71.845 | PSLT018 | 100   |
| R19575  | -            | STM3973 | 62.037 | STM1222 | 62     | PSLT104 | 11.06 |
| R11287  | +            | STM0291 | 62.162 | STM3962 | 61     | STM0291 | 11.71 |
| R50790  | -            | STM2679 | 58.824 | STM0435 | 58.654 | STM2679 | 20.5  |
| R44177  | +            | STM1124 | 61.905 | STM0286 | 55.238 | STM1124 | 22.8  |
| R27297  | -            | STM2307 | 62.857 | STM0322 | 59.633 | STM2307 | 24.86 |
| R8184   | +            | STM3705 | 60.577 |         |        | STM3705 | 16.2  |
|         |              | STM2587 | 100    |         |        | STM2587 | 100   |
| 777719  | atgaataaac-  | STM0710 | 100    | STM2560 | 84     | STM0710 | 100   |
|         |              | STM0760 | 100    | STM2670 | 71.287 | STM0760 | 100   |
| 919972  | gtgccgcacc+  | STM0848 | 100    | STM1742 | 73     | STM0848 | 100   |
|         |              | STM0855 | 100    | STM3149 | 49.505 | STM0855 | 100   |
|         |              | STM0891 | 100    | STM1951 | 70.588 | STM0891 | 100   |
|         |              | STM1020 | 70     | STM2620 | 69     | STM1020 | 59.51 |
|         |              | STM3945 | 99     | STM0546 | 57.426 | STM3945 | 11.74 |
|         |              | STM4262 | 61.165 | STM0084 | 56.311 | STM4262 | 20.21 |
|         |              | STM2514 | 100    | STM2515 | 70     | STM2514 | 84.39 |
|         |              | STM2883 | 100    | STM0725 | 59.804 | STM2883 | 71.49 |
|         |              | STM3639 | 71     | STM0197 | 64.22  | STM0339 | 42.07 |
|         |              | STM0724 | 60.194 | STM2814 | 57.407 | STM0724 | 12.38 |
|         |              | STM2516 | 100    |         |        | STM2516 | 93.2  |
|         |              | STM2938 | 86     | STM0177 | 56     | STM2938 | 73.32 |
|         |              | STM2198 | 26.263 | STM2514 | 23.232 | STM2198 | 26.27 |
|         |              | STM0299 | 85     | STM3633 | 62.617 | STM0299 | 68.5  |
|         |              | STM3845 | 60.748 | STM0887 | 60.194 | STM4524 | 17.15 |
|         |              | STM0671 | 60.396 |         |        | STM0671 | 4.8   |
|         |              | STM2701 | 94     | STM4533 | 60     | STM2701 | 83.7  |
|         |              | STM3506 | 44.118 | STM3983 | 43     | STM3506 | 10.52 |
|         |              | STM3040 | 65.347 | STM0757 | 59.406 | STM0757 | 41.29 |
|         |              | STM3057 | 54.808 |         |        | STM3057 | 6.9   |
|         |              | STM3446 | 63.107 | STM0166 | 60.396 | STM0166 | 16.3  |
|         |              | STM3859 | 100    | STM3183 | 61.386 | STM3859 | 66.31 |
|         |              | STM2965 | 61.165 | STM1871 | 59.406 | STM2965 | 4.03  |
|         |              | STM3241 | 63.889 | STM0318 | 57.692 | STM0318 | 33.58 |
|         |              | STM4173 | 66     |         |        | STM4173 | 7.87  |
|         |              | STM4201 | 64.762 |         |        | STM4201 | 28.44 |
|         |              | STM2915 | 63.725 | STM2521 | 53.774 | STM2915 | 6.09  |
|         |              | STM0604 | 68     | STM0268 | 52     | STM0604 | 56.33 |
|         |              | STM2695 | 99     | STM3445 | 64.762 | STM2695 | 89.4  |
|         |              | STM2345 | 67.593 | STM2531 | 63.107 | STM3831 | 11.35 |
|         |              | STM2704 | 98     | STM1050 | 76     | STM2704 | 86.02 |
|         |              | STM0939 | 62.376 | STM1343 | 61.765 | STM2252 | 17.05 |
|         |              | STM2435 | 56     |         |        | STM2435 | 11.9  |

|                        |         |        |         |        |         |       |
|------------------------|---------|--------|---------|--------|---------|-------|
|                        | STM2566 | 59     | STM1922 | 52     | STM2566 | 8.94  |
|                        | STM3765 | 53.922 |         |        | STM3765 | 14.03 |
|                        | PSLT054 | 86     | STM1997 | 73     | PSLT054 | 79.1  |
| 1162883 atgtacacttc -  | STM1071 | 100    |         |        | STM1071 | 100   |
| 4447638 atggctatggt -  | STM4227 | 100    | STM0107 | 62.264 | STM4227 | 100   |
| 166329 atgagcgtta: -   | STM0142 | 100    | STM2343 | 52.427 | STM0142 | 100   |
| 203874 atgatgcagc +    | STM0173 | 100    | STM4052 | 55     | STM0173 | 100   |
| 226773 atgcagga: +     | STM0192 | 100    | STM0590 | 78.431 | STM0192 | 100   |
| 287030 atgtctgagg: -   | STM0246 | 100    | STM0512 | 66.667 | STM0246 | 100   |
| 3546807 atgcgatta: -   | STM3375 | 100    | STM2164 | 62.376 | STM3375 | 100   |
| 716473 atgaataaga +    | STM0652 | 100    | STM2562 | 77     | STM0652 | 99.84 |
| 744931 atgagactga -    | STM0684 | 100    |         |        | STM0684 | 100   |
| 3827364 atgaaccgct -   | STM3639 | 100    | STM0339 | 65.385 | STM3639 | 100   |
| 4045825 atgaaacgc: +   | STM3839 | 100    | STM2774 | 58.252 | STM3839 | 100   |
| 4066165 atgactaaaa -   | STM3858 | 100    | STM2204 | 80     | STM3858 | 100   |
| 3824097 atgttgaaa: -   | STM3637 | 100    | STM3669 | 65     | STM3637 | 100   |
| 4057689 atgaaaaaa: +   | STM3850 | 100    | STM2191 | 64.356 | STM3850 | 100   |
| 4095477 atgaacatga +   | STM3884 | 100    | STM2759 | 64.706 | STM3884 | 100   |
| 3909504 atgctaacca +   | STM3713 | 100    |         |        | STM3713 | 100   |
| 265401 gtgaaaaag: +    | STM0225 | 100    | STM1009 | 61     | STM0225 | 100   |
| 141710 atgatcagca +    | STM0121 | 100    | STM1909 | 61.538 | STM0121 | 100   |
| 2907332 atgcgtaaag -   | STM2765 | 100    | STM0297 | 84     | STM2765 | 100   |
| 2940112 atgtatgattt: + | STM2790 | 100    | STM0615 | 64.356 | STM2790 | 100   |
| 1561789 atgcataaaa -   | STM1484 | 100    | STM3294 | 63.725 | STM1484 | 100   |
| 3595546 atggaattag: -  | STM3439 | 100    | STM3551 | 49.02  | STM3439 | 100   |
| 3636102 atgtttaaatt: + | STM3480 | 100    | STM1130 | 71.287 | STM3480 | 100   |
| 3667852 atggcgacct +   | STM3508 | 100    | STM3766 | 84     | STM3508 | 100   |
| 3581907 atgagtcgta -   | STM3411 | 100    | STM3410 | 93     | STM3411 | 100   |
| 3613702 atgcgcggt: +   | STM3462 | 100    |         |        | STM3462 | 100   |
| 3654367 atgattatgcc +  | STM3498 | 100    | STM2497 | 61.765 | STM3498 | 100   |
| 1338441 atgacaaata -   | STM1254 | 100    | STM2936 | 60.577 | STM1254 | 100   |
| 1366421 atgagcatag +   | STM1287 | 100    | STM0036 | 68     | STM1287 | 100   |
| 2202650 atgatgaaat: -  | STM2118 | 100    |         |        | STM2118 | 100   |
| 3692400 atgggtgggc -   | STM3528 | 100    | STM3792 | 60.377 | STM3528 | 100   |
| 3724566 atggctggtt: -  | STM3554 | 100    | STM4230 | 76     | STM3554 | 100   |
| 2206847 atgagacgat -   | STM2120 | 100    | STM0126 | 90     | STM2120 | 100   |
| 2858508 gtggatgagc -   | STM2711 | 100    |         |        | STM2711 | 100   |
| 328518 atgcgccgcr +    | STM0286 | 100    | STM1914 | 74     | STM0286 | 100   |
| 358855 atgcgcaaa: +    | STM0313 | 100    |         |        | STM0313 | 100   |
| 2196291 atgtctcgtct -  | STM2112 | 100    | STM3963 | 71.698 | STM2112 | 100   |
| 2232542 atggcacgtt +   | STM2137 | 100    | STM4157 | 77     | STM2137 | 100   |
| 2879233 atgcctaacc +   | STM2740 | 100    | STM2763 | 66     | STM2740 | 100   |
| 2894907 atggaaacgr -   | STM2756 | 100    | STM3201 | 60.577 | STM2756 | 100   |
| 1135239 atgagcaaa: +   | STM1048 | 100    | STM2589 | 84     | STM1048 | 100   |
| 1173525 atgcatattcg +  | STM1082 | 100    | STM3708 | 83.168 | STM1082 | 100   |
| 942592 atgaaagaa: +    | STM0869 | 100    |         |        | STM0869 | 98.1  |
| 966725 ttgccctcaat -   | STM0897 | 100    |         |        | STM0897 | 100   |
| 986717 atgtctctgaa +   | STM0914 | 100    | STM2600 | 90     | STM0914 | 100   |
| 1007527 atgaaggtag -   | STM0932 | 100    | STM2272 | 71     | STM0932 | 100   |
| 2682751 atgaaattac: -  | STM2543 | 100    | STM1373 | 64.706 | STM2543 | 100   |
| 2731901 gtgatgagat: +  | STM2585 | 100    | STM1216 | 57.426 | STM2585 | 100   |
| 2625918 atgtactgtat -  | STM2511 | 100    | STM0141 | 64     | STM2511 | 100   |

|                        |         |     |         |        |         |       |
|------------------------|---------|-----|---------|--------|---------|-------|
| 1074433 atgtcattgcc +  | STM0986 | 100 | STM4246 | 61.321 | STM0986 | 100   |
| 1122747 gtgaagaca: +   | STM1033 | 100 | STM0912 | 88     | STM1033 | 100   |
| 4436030 atggaaacat -   | STM4215 | 100 |         |        | STM4215 | 100   |
| 2998373 atgagttcact -  | STM2851 | 100 |         |        | STM2851 | 100   |
| 3065202 atggcatttga +  | STM2922 | 100 | STM3521 | 63.81  | STM2922 | 100   |
| 2585500 atgtcccgtac: + | STM2474 | 100 | STM3076 | 85     | STM2474 | 100   |
| 1024974 atgtcaatca: +  | STM0945 | 100 | STM2660 | 71.845 | STM0945 | 100   |
| 1076514 atggaacagt +   | STM0989 | 100 | STM4081 | 63.462 | STM0989 | 100   |
| 1124000 atggaggtaa +   | STM1036 | 100 | STM0914 | 62.136 | STM1036 | 100   |
| 4422824 atggataaac -   | STM4201 | 100 | STM0771 | 64.356 | STM4201 | 100   |
| 4464958 atgcagcctg +   | STM4243 | 100 | STM1971 | 56     | STM4243 | 100   |
| 4684955 atgatgaaag +   | STM4442 | 100 | STM1720 | 60.396 | STM4442 | 100   |
| 2429502 atgaacatgc -   | STM2318 | 100 | STM2316 | 70     | STM2318 | 100   |
| 2457130 atgtcgggaa -   | STM2344 | 100 | STM4385 | 67     | STM2344 | 100   |
| 1204941 atgaaaaaal +   | STM1117 | 100 | STM1460 | 59.615 | STM1117 | 100   |
| 1343908 atgctgagct: +  | STM1259 | 100 | STM0106 | 62.745 | STM1259 | 100   |
| 1199919 atggaactta: -  | STM1112 | 100 | STM0013 | 68     | STM1112 | 100   |
| 1158426 atggtagata: -  | STM1067 | 100 |         |        | STM1067 | 100   |
| 2648551 atgcaagca: -   | STM2516 | 100 | STM0322 | 61     | STM2516 | 100   |
| 30512 atgcgtaacg +     | STM0026 | 100 | STM4591 | 64     | STM0026 | 100   |
| 2071455 gtgccgcac: -   | STM1987 | 100 | STM3388 | 65.385 | STM1987 | 100   |
| 2143918 atgaagatati +  | STM2066 | 100 |         |        | STM2066 | 100   |
| 2380233 atgttacgtaa +  | STM2275 | 100 | STM2746 | 71.154 | STM2275 | 100   |
| 2072793 ttggcaggaa -   | STM1989 | 100 | STM2851 | 60.185 | STM1989 | 100   |
| 2148385 atgaaaccac: -  | STM2069 | 100 | STM3235 | 69     | STM2069 | 100   |
| 2386374 atgaaagaa: -   | STM2280 | 100 | STM0714 | 62.264 | STM2280 | 100   |
| 2421644 atggacaattt +  | STM2314 | 100 | STM1880 | 61     | STM2314 | 100   |
| 2469751 atgtatatgcc -  | STM2358 | 100 | STM2959 | 64.035 | STM2358 | 100   |
| 1273090 atgaaaaca: +   | STM1187 | 100 | STM2662 | 64.423 | STM1187 | 91.95 |
| 1258663 atgctcgaca +   | STM1174 | 100 | STM2497 | 61.468 | STM1174 | 100   |
| 3601672 atggctcgtac -  | STM3446 | 100 | STM4009 | 64     | STM3446 | 100   |
| 384939 atgtctatgaa -   | STM0340 | 100 | STM4258 | 62.376 | STM0340 | 100   |
| 192421 atgaaaatga +    | STM0162 | 100 | STM0622 | 80     | STM0162 | 100   |
| 497180 atgttcggaa: -   | STM0442 | 100 | STM0217 | 66     | STM0442 | 100   |
| 4511469 gtgaataacg +   | STM4272 | 100 | STM3238 | 59.633 | STM4272 | 100   |
| 4401770 atgccgattc: +  | STM4182 | 100 | STM3168 | 62.385 | STM4182 | 100   |
| 163207 atgcacaccc -    | STM0139 | 100 | STM0452 | 81     | STM0139 | 100   |
| 2410614 atgatgaaati +  | STM2301 | 100 |         |        | STM2301 | 100   |
| 1444163 atgaaaaatc -   | STM1361 | 100 | STM1360 | 65.049 | STM1361 | 100   |
| 1514023 atgtcatcag: -  | STM1436 | 100 | STM0979 | 62.617 | STM1436 | 100   |
| 454577 atgaccatc: +    | STM0399 | 100 | STM1320 | 62.376 | STM0399 | 100   |
| 1492263 atgagttttact + | STM1410 | 100 | STM1411 | 100    | STM1411 | 71.5  |
| 4449197 atggatgtcat -  | STM4228 | 100 | STM3983 | 63.81  | STM4228 | 100   |
| 368680 atgtcggaa: +    | STM0322 | 100 | STM2250 | 66.667 | STM0322 | 100   |
| 195876 atggccgaa: -    | STM0166 | 100 | STM4091 | 63     | STM0166 | 100   |
| 2083148 atgattaagt: +  | STM2001 | 100 | STM3609 | 70.476 | STM2001 | 100   |
| 2518929 atgacaaagt -   | STM2403 | 100 | STM1330 | 63.725 | STM2403 | 100   |
| 2414856 atgatctatcc -  | STM2307 | 100 |         |        | STM2307 | 100   |
| 2403022 atgcgtcaac +   | STM2295 | 100 | STM3132 | 64     | STM2295 | 100   |
| 2685238 atgcatccga +   | STM2546 | 100 | STM4404 | 59.406 | STM2546 | 100   |
| 4714879 atgaaacgca: -  | STM4472 | 100 | STM3603 | 58.252 | STM4472 | 100   |
| 598465 atggcgacac: -   | STM0535 | 100 | STM4050 | 59.223 | STM0535 | 100   |

|                       |         |     |          |        |         |       |
|-----------------------|---------|-----|----------|--------|---------|-------|
| 2742843 atgcaggac-    | STM2592 | 100 | STM0921  | 77     | STM2592 | 100   |
| 2750835 atggcaaca-    | STM2602 | 100 |          |        | STM2602 | 100   |
| 4821171 atgcctgcct-   | STM4566 | 100 | STM3478  | 63.366 | STM4566 | 100   |
| 3896036 atgaacca-     | STM3700 | 100 |          |        | STM3700 | 100   |
| 3786474 atgactaaag-   | STM3610 | 100 | STM3264  | 67.327 | STM3610 | 100   |
| 3676306 atgtcacagc-   | STM3514 | 100 | STM3534  | 76     | STM3514 | 100   |
| 2523218 atgattatca+   | STM2406 | 100 | STM0421  | 65     | STM2406 | 100   |
| 2598821 atgtcgtgcc+   | STM2483 | 100 | STM3053  | 64.706 | STM2483 | 100   |
| 1037236 atggtagata+   | STM0959 | 100 | STM0018  | 61.321 | STM0959 | 100   |
| 626882 atgcaggaat-    | STM0569 | 100 | STM2551  | 60.194 | STM0569 | 100   |
| 4681731 atgacaaag-    | STM4437 | 100 | STM2804  | 86     | STM4437 | 100   |
| 4804071 atgtctccag-   | STM4544 | 100 | STM2570  | 62.857 | STM4544 | 81.45 |
| 3927395 atgctccag-    | STM3734 | 100 | STM1712  | 63.366 | STM3734 | 100   |
| 3378878 atggttaagg-   | STM3212 | 100 | STM0777  | 62.376 | STM3212 | 100   |
| 3425838 atgaaaaag+    | STM3255 | 100 | STM2204  | 70.297 | STM3255 | 100   |
| 3928384 atgatccgca+   | STM3735 | 100 | STM4009  | 88     | STM3735 | 100   |
| 4779015 atgagtgggg-   | STM4524 | 100 | STM2042  | 61.386 | STM4524 | 100   |
| 138053 atgcgccgg+     | STM0117 | 100 | STM2654  | 72.642 | STM0117 | 100   |
| 3033381 atgtttacgc-   | STM2888 | 100 |          |        | STM2888 | 100   |
| 804546 atgcagaac+     | STM0736 | 100 | STM0841  | 70     | STM0736 | 100   |
| 4545267 atgagcatct+   | STM4299 | 100 | STM3750  | 63     | STM4299 | 100   |
| 2816621 atgagcaag-    | STM2675 | 100 | STM4098  | 59.406 | STM2675 | 100   |
| 2689332 atgagcattg+   | STM2550 | 100 | STM1497  | 60     | STM2550 | 100   |
| 2151921 atgagcttca+   | STM2072 | 100 | STM1947  | 79     | STM2072 | 100   |
| 366032 atgaataaaa-    | STM0320 | 100 | STM1530  | 76     | STM0320 | 100   |
| 555286 atgaaattttg+   | STM0494 | 100 | STM4104  | 61.538 | STM0494 | 100   |
| 1147971 atgtactatcc+  | STM1058 | 100 |          |        | STM1058 | 100   |
| 4564341 atgaaaagtc-   | STM4319 | 100 |          |        | STM4319 | 100   |
| 4274485 atgaaaaagi+   | STM4063 | 100 | STM2444  | 72     | STM4063 | 100   |
| 733239 atgagccag-     | STM0668 | 100 | STM2314  | 49.02  | STM0668 | 100   |
| 788820 atgaaaatct+    | STM0723 | 100 | STM2126  | 75.49  | STM0723 | 100   |
| 2117939 atggcagaa+    | STM2039 | 100 | STM2039  | 60     | STM2039 | 100   |
| 4557868 atgaaactca-   | STM4309 | 100 |          |        | STM4309 | 100   |
| 2041364 atgagtgcga-   | STM1951 | 100 | STM2351  | 82     | STM1951 | 100   |
| 1770852 atggacaag-    | STM1677 | 100 | STM3607  | 62     | STM1677 | 100   |
|                       | STM4261 | 100 | STM0274  | 62.136 | STM4261 | 100   |
| 69680 atgcagaata+     | STM0058 | 100 | STM0624  | 75     | STM0058 | 100   |
| 1349770 atgcttattcgt- | STM1268 | 100 | STM3084  | 60.748 | STM1268 | 100   |
| 4394051 atgcaaca-     | STM4176 | 100 |          |        | STM4176 | 100   |
| 2677401 atgacagaa-    | STM2536 | 100 | STM4477  | 70     | STM2536 | 100   |
| 2120843 atgaataccg+   | STM2042 | 100 | STM4524  | 61.765 | STM2042 | 100   |
| 4548447 atgttattagt-  | STM4301 | 100 | STM3599  | 68     | STM4301 | 100   |
| 2026689 atgaaaaagi-   | STM1931 | 100 | STM0618  | 61.682 | STM1931 | 100   |
| 1279957 atgagctttga+  | STM1195 | 100 | STM4483  | 62.963 | STM1195 | 100   |
| 1758491 atgacaaa-     | STM1664 | 100 | STM4042A | 64     | STM1664 | 100   |
| 2809417 atgacatcgg+   | STM2667 | 100 | STM2668  | 58     | STM2667 | 100   |
| 5887 atgctgattct-     | STM0005 | 100 | STM0686  | 62.857 | STM0005 | 100   |
| 3995621 atggagacc+    | STM3794 | 100 | STM0864  | 80     | STM3794 | 100   |
| 1551224 ttgaatcaaa+   | STM1474 | 100 | STM0071  | 71.154 | STM1474 | 100   |
| 4247808 atgcagggtca-  | STM4037 | 100 | STM1570  | 90     | STM4037 | 100   |
| 4177195 gtggatattac+  | STM3969 | 100 | STM4347  | 61.765 | STM3969 | 100   |
| 4144290 atgacgga-     | STM3936 | 100 | STM3705  | 64.762 | STM3936 | 100   |

|                        |         |     |         |        |         |       |
|------------------------|---------|-----|---------|--------|---------|-------|
| 3230590 atgtctaaaat -  | STM3068 | 100 | STM3682 | 73.267 | STM3068 | 99.91 |
| 2064539 atgggcgata +   | STM1976 | 100 |         |        | STM1976 | 100   |
| 2543067 atggtttcatcæ + | STM2429 | 100 | STM2367 | 66     | STM2429 | 87.29 |
| 1889079 atgaatgcgc +   | STM1789 | 100 | STM1536 | 65.686 | STM1789 | 100   |
| 3457815 atgaacaaa(-    | STM3287 | 100 | STM0145 | 57.426 | STM3287 | 100   |
| 3122060 atggaaaccæ +   | STM2970 | 100 | STM3243 | 72     | STM2970 | 100   |
| 4264700 atgattgaccr -  | STM4052 | 100 | STM3171 | 73.786 | STM4052 | 100   |
| 4182092 atggctgtag; +  | STM3975 | 100 | STM1361 | 61.538 | STM3975 | 100   |
| 4164405 atggatgaacg +  | STM3958 | 100 | STM0692 | 62.745 | STM3958 | 100   |
| 4161476 atgaggtgtcæ -  | STM3956 | 100 | STM1893 | 63.107 | STM3956 | 100   |
| 547876 atgcgctcaga +   | STM0489 | 100 | STM4578 | 62.264 | STM0489 | 100   |
| 4361787 atgtctaaag; +  | STM3445 | 100 | STM4146 | 100    | STM4146 | 100   |
| 2059209 atgagtaatct +  | STM1970 | 100 |         |        | STM1970 | 100   |
| 3090711 atgagcgaa; -   | STM2947 | 100 | STM2384 | 64.151 | STM2947 | 99.65 |
| 3157371 gtgtcaataaæ -  | STM2999 | 100 | STM4496 | 71     | STM2999 | 100   |
| 1780787 atgttgaaaa; -  | STM1686 | 100 | STM2269 | 63.462 | STM1686 | 100   |
| 562339 atgctcattctt -  | STM0501 | 100 | STM3879 | 59.804 | STM0501 | 100   |
| 588712 atgggatatct -   | STM0526 | 100 | STM1475 | 65.347 | STM0526 | 100   |
| 635916 atgttgctcac -   | STM0575 | 100 | STM1831 | 64.356 | STM0575 | 100   |
| 1726739 atgatcgctg; +  | STM1636 | 100 | STM1952 | 65     | STM1636 | 100   |
| 1804699 atgcagcttaæ +  | STM1711 | 100 |         |        | STM1711 | 100   |
| 1856174 atgcacttct -   | STM1761 | 100 | STM1580 | 78     | STM1761 | 100   |
| 1901542 ttggatgctgc +  | STM1801 | 100 | STM4062 | 64.078 | STM1801 | 100   |
| 1932710 atgtttgctgg; + | STM1834 | 100 | STM2129 | 60     | STM1834 | 100   |
| 1957711 atggacgaa; -   | STM1860 | 100 |         |        | STM1860 | 100   |
| 2001771 atggcgttact -  | STM1907 | 100 | STM3090 | 65.421 | STM1907 | 100   |
| 550301 atgaaatttcc +   | STM0491 | 100 | STM2332 | 63.208 | STM0491 | 100   |
| 1609964 gtgaatcattc -  | STM1533 | 100 | STM1791 | 77.885 | STM1533 | 100   |
| 1601080 atggacctga -   | STM1523 | 100 | STM4380 | 65.094 | STM1523 | 100   |
| 1057378 atgtccgagc -   | STM0973 | 100 | STM3241 | 88     | STM0973 | 100   |
| 685358 atgacgcagæ -    | STM0621 | 100 | STM0061 | 85     | STM0621 | 100   |
| 1643887 atgaataaatl -  | STM1562 | 100 | STM3320 | 59.804 | STM1562 | 100   |
| 1684076 atgttggtcaa +  | STM1594 | 100 | STM1561 | 63.366 | STM1594 | 100   |
| 3769945 atgaccaaæ +    | STM3597 | 100 | STM0174 | 61.404 | STM3597 | 100   |
| 3817910 atgccgcaac -   | STM3631 | 100 | STM1356 | 61.538 | STM3631 | 100   |
| 4758178 atggaactgc +   | STM4503 | 100 | STM4113 | 65.347 | STM4503 | 100   |
| 3924741 atgatgagcc +   | STM3730 | 100 | STM0850 | 77.228 | STM3730 | 100   |
| 3105114 atggctcgcg -   | STM2956 | 100 | STM3742 | 71     | STM2956 | 100   |
| 2821552 atgtcagaag +   | STM2680 | 100 |         |        | STM2680 | 100   |
| 436808 atggaatcct; +   | STM0382 | 100 | STM1154 | 76     | STM0382 | 100   |
| 491767 atggaaatta; +   | STM0437 | 100 | STM0438 | 67.327 | STM0437 | 100   |
| 522180 atgaagatag +    | STM0463 | 100 | STM2127 | 75.49  | STM0463 | 100   |
| 3773312 atgagcatca -   | STM3600 | 100 | STM2425 | 58.491 | STM3600 | 100   |
| 3846367 atgtatatcgg -  | STM3660 | 100 | STM3674 | 57     | STM3660 | 100   |
| 3885613 atgaatagaa +   | STM3691 | 100 | STM0126 | 61.905 | STM3691 | 100   |
| 4630043 atgagagccc -   | STM4389 | 100 | STM1556 | 50     | STM4389 | 100   |
| 441390 atgatgcaac +    | STM0388 | 100 |         |        | STM0388 | 100   |
| 474573 atgcaataca -    | STM0421 | 100 | STM2406 | 65     | STM0421 | 100   |
| 3322182 atgacggata +   | STM3161 | 100 | STM4100 | 66     | STM3161 | 89.8  |
| 2993342 atgagcaattl -  | STM2847 | 100 | STM2327 | 71.287 | STM2847 | 100   |
| 3852558 atgaaactgr; +  | STM3664 | 100 | STM0160 | 68     | STM3664 | 99.85 |
| 3504908 atgatgatgg; -  | STM3335 | 100 | STM2124 | 65     | STM3335 | 100   |

|                       |         |             |                |       |
|-----------------------|---------|-------------|----------------|-------|
| 3433263 atgaaacaa-    | STM3263 | 100 STM0231 | 75.248 STM3263 | 100   |
| 3316768 atggaacgct-   | STM3153 | 100 STM2493 | 62.745 STM3153 | 100   |
| 414771 atgcctttgga+   | STM0364 | 100 STM0191 | 88 STM0364     | 100   |
| 2949647 atggaggatc+   | STM2802 | 100 STM3229 | 64 STM2802     | 100   |
| 2301410 atgcatattac-  | STM2201 | 100 STM4448 | 61.165 STM2201 | 100   |
| 428101 atgcactcctc+   | STM0373 | 100 STM1787 | 64.22 STM0373  | 100   |
| 2280050 atgcatccac+   | STM2183 | 100 STM4106 | 62.745 STM2183 | 100   |
| 2166237 atgaaaataa-   | STM2085 | 100 STM0478 | 59.804 STM2085 | 100   |
| 2236017 atgactgatat-  | STM2141 | 100 STM3747 | 61.765 STM2141 | 100   |
| 2271662 atgctgtttta-  | STM2174 | 100 STM3384 | 67.308 STM2174 | 100   |
| 3585359 atggcaaagc-   | STM3417 | 100 STM2530 | 61.682 STM3417 | 100   |
| 2192600 atgaataagc-   | STM2108 | 100 STM2107 | 29 STM2108     | 100   |
| 2265467 atgtctccatc+  | STM2167 | 100         | STM2167        | 100   |
| 302874 atgaaaccgc+    | STM0262 | 100 STM0055 | 51 STM0262     | 100   |
| 3808099 atgactcagc+   | STM3624 | 100 STM3821 | 67.327 STM3624 | 100   |
| 3716105 atgagtgaac+   | STM3546 | 100 STM1569 | 57.798 STM3546 | 100   |
| 3476154 atggataaatl-  | STM3307 | 100 STM0007 | 62 STM3307     | 100   |
| 4627425 atgaaattac+   | STM4385 | 100 STM2344 | 67 STM4385     | 100   |
| 4711673 atgattattggr+ | STM4468 | 100 STM3080 | 65 STM4468     | 100   |
| 4844220 atgaaataca+   | STM4587 | 100         | STM4587        | 96.93 |
| 3933721 atggctcaag+   | STM3740 | 100 STM0937 | 74.286 STM3740 | 100   |
| 3467774 atgaccggttt+  | STM3298 | 100 STM2898 | 46 STM3298     | 100   |
| 3396756 atgaaatacc+   | STM3228 | 100 STM3286 | 64.423 STM3228 | 100   |
| 3517947 atgtttgtgaa+  | STM3349 | 100 STM3348 | 76 STM3349     | 100   |
| 3432242 atgaactcatt+  | STM3262 | 100 STM2919 | 68 STM3262     | 100   |
| 3394744 atggctacgc+   | STM3225 | 100 STM0769 | 64.706 STM3225 | 100   |
| 692727 atgtatgttgcc+  | STM0628 | 100 STM4467 | 65.385 STM0628 | 100   |
| 201352 atgaaacata+    | STM0170 | 100 STM2069 | 58.491 STM0170 | 100   |
| 788106 atgaatgattc+   | STM0722 | 100 STM2767 | 64.706 STM0722 | 100   |
| 4587072 atgagcgaa+    | STM4344 | 100 STM3040 | 62 STM4344     | 100   |
| 1489443 atgaaacctg+   | STM1405 | 100 STM2290 | 58.416 STM1405 | 100   |
| 1598855 atgatggattc+  | STM1521 | 100 STM2253 | 72.277 STM1521 | 100   |
| 826323 atgagtcgtat-   | STM0762 | 100 STM0609 | 60.396 STM0762 | 100   |
| 874947 gtgggacctc+    | STM0808 | 100 STM4397 | 59.223 STM0808 | 100   |
| 927468 atggagcgttc+   | STM0855 | 100 STM0854 | 83 STM0855     | 100   |
| 4776197 atggaatttta+  | STM4521 | 100 STM4520 | 34 STM4521     | 100   |
| 3276814 atgctattttta- | STM3117 | 100 STM4040 | 47 STM3117     | 100   |
| 526612 atgaaacctg+    | STM0469 | 100 STM4264 | 60.577 STM0469 | 100   |
| 3116655 atgacgactc-   | STM2965 | 100 STM4154 | 59.615 STM2965 | 100   |
| 3251341 atgggtataa+   | STM3088 | 100 STM3089 | 100 STM3089    | 56.25 |
| 1962271 atgtttctctta- | STM1866 | 100 STM1378 | 53.465 STM1866 | 100   |
| 4510787 atggctgtggr+  | STM4271 | 100 STM2109 | 66.355 STM4271 | 100   |
| 4436504 atgaaactca-   | STM4216 | 100 STM4014 | 62.136 STM4216 | 100   |
| 4513468 atgaatgacc-   | STM4274 | 100 STM3610 | 61.165 STM4274 | 100   |
| 1123453 atggctgacc+   | STM1035 | 100 STM0913 | 60.194 STM1035 | 100   |
| 3587983 atggcaaagc-   | STM3422 | 100 STM1510 | 47 STM3422     | 100   |
| 1105460 atgaacaaa-    | STM1012 | 100 STM2628 | 100 STM1012    | 100   |
| 4816786 atggtaaagc+   | STM4562 | 100 STM2339 | 50 STM4562     | 100   |
| 1645396 atgtttacttat+ | STM1564 | 100 STM2995 | 58.716 STM1564 | 100   |
| 2860745 atgaaagtgc-   | STM2717 | 100 STM1721 | 48.544 STM2717 | 100   |
| 686569 atgaaaataa-    | STM0623 | 100 STM0059 | 66.337 STM0623 | 100   |
| 1030565 atggccaaa-    | STM0953 | 100 STM0954 | 73 STM0953     | 100   |

|         |                |         |        |         |        |         |       |
|---------|----------------|---------|--------|---------|--------|---------|-------|
| 2860538 | atgacgcttg:-   | STM2716 | 100    | STM1102 | 53.922 | STM2716 | 100   |
| 163827  | atgaggtata:-   | STM0140 | 100    | STM1901 | 64.706 | STM0140 | 100   |
| 319767  | gtgaatgaat:+   | STM0280 | 100    | STM1284 | 58.416 | STM0280 | 100   |
| 212360  | gtgctaatacat:- | STM0181 | 100    |         |        | STM0181 | 100   |
| 441608  | atgccaacca:+   | STM0389 | 100    | STM1399 | 35     | STM0389 | 100   |
| 24039   | atgaaaaaa:+    | STM0020 | 100    | STM4596 | 65     | STM0020 | 100   |
| 3320885 | gtggctttttta:- | STM3160 | 100    | STM1913 | 45     | STM3160 | 100   |
| 1950670 | atgttcgcgcgt:+ | STM1852 | 100    | STM3255 | 58.879 | STM1852 | 100   |
| 1672440 | atgaaaaagi:-   | STM1585 | 100    | STM1673 | 69     | STM1585 | 100   |
| 526758  | atgcaggtgtt:+  | STM0470 | 100    | STM4364 | 59.804 | STM0470 | 100   |
| 1935912 | atgtgtggcat:-  | STM1838 | 100    | STM1997 | 59.804 | STM1838 | 100   |
| 1645634 | atgaaatcga:+   | STM1565 | 100    | STM0131 | 60     | STM1565 | 100   |
| 845508  | atgttagagtt:+  | STM0780 | 100    | STM2970 | 56.311 | STM0780 | 96.15 |
| P32320  | atggatttcttg:- | PSLT041 | 100    | STM1353 | 60.194 | PSLT041 | 100   |
| P77943  | gtgcgtaaat:+   | PSLT098 | 100    | STM0770 | 71.569 | PSLT098 | 100   |
| P66869  | gtgataaaaa:+   | PSLT083 | 100    | STM2275 | 51     | PSLT083 | 100   |
| P83946  | atgaaaatga:+   | PSLT103 | 100    | STM3730 | 61.165 | PSLT103 | 100   |
| P45022  | atggaaaaata:+  | PSLT052 | 100    | STM0120 | 50.98  | PSLT052 | 100   |
| P73220  | atgaaacggt:+   | PSLT092 | 100    | STM0706 | 64.423 | PSLT092 | 100   |
| R14014  | +              | PSLT002 | 62     | STM2857 | 47.525 | PSLT002 | 20.78 |
| R8419   | +              | PSLT041 | 62.376 |         |        | PSLT041 | 40.62 |
| R3051   | -              | STM0772 | 32     |         |        | STM0772 | 10.45 |
| R3894   | +              |         |        |         |        |         |       |
| R49253  | +              |         |        |         |        |         |       |
| R42667  | -              | STM2448 | 65.347 | STM1824 | 64.078 | STM3493 | 11.2  |
| 2852990 | ttgttgacacc:+  | STM2703 | 100    | STM2110 | 63.725 | STM2703 | 100   |
|         |                | STM0910 | 100    | STM1031 | 79     | STM0910 | 100   |
| 985449  | atgaaaacc:+    | STM0912 | 100    | STM1033 | 80     | STM0912 | 100   |
|         |                | STM2960 | 100    | STM2961 | 78     | STM2960 | 100   |
|         |                | STM2971 | 100    | STM1826 | 79.208 | STM2971 | 100   |
|         |                | STM0925 | 100    | STM2589 | 100    | STM0925 | 100   |
|         |                | STM2082 | 64     | STM0442 | 61     | STM2082 | 12.33 |
|         |                | STM0643 | 64.356 | STM3384 | 56.881 | STM3384 | 51.14 |
|         |                | STM2253 | 62.376 | STM3818 | 62.376 | STM2253 | 32.15 |
|         |                | STM4533 | 60.396 | STM0927 | 58.824 | STM0927 | 31.24 |
|         |                | STM1987 | 67.327 | STM0401 | 62.857 | STM4551 | 22.39 |
|         |                | STM3567 | 57.692 |         |        | STM3567 | 35.34 |
|         |                | STM4589 | 61.468 | STM4110 | 59.406 | STM4215 | 30.11 |
|         |                | STM1473 | 100    | STM1995 | 89     | STM1473 | 55.15 |
|         |                | STM3069 | 44     | STM1578 | 43.564 | STM3069 | 19.23 |
|         |                | STM2730 | 67     | STM3484 | 67     | STM3484 | 37.5  |
|         |                | STM3275 | 60.377 |         |        | STM3275 | 24.29 |
|         |                | STM2705 | 77     | STM0685 | 60.577 | STM2705 | 36.61 |
|         |                | STM1679 | 39     |         |        | STM1679 | 31.44 |
| 833220  | atggaaagtc:+   | STM0054 | 99     | STM0768 | 99     | STM0768 | 93.4  |
|         |                | STM1869 | 100    | STM0908 | 78     | STM1869 | 89.31 |
|         |                | STM1751 | 60.952 | STM0189 | 59.223 | STM1751 | 23.4  |
|         |                | STM0410 | 59     | STM3171 | 58.416 | STM0410 | 27.6  |



|         |        |         |        |         |       |
|---------|--------|---------|--------|---------|-------|
| STM2890 | 62.963 | STM1668 | 58.416 | STM1668 | 43.61 |
| STM1544 | 56     |         |        | STM1544 | 29.64 |
| STM2746 | 62.136 | STM4260 | 59.633 | STM0972 | 29.42 |
| STM1614 | 63.81  | STM3970 | 58.095 | STM2877 | 27.24 |
| STM1795 | 60.185 | STM2259 | 56.863 | STM2259 | 21.07 |
| STM4502 | 86     | STM0941 | 61.765 | STM4502 | 73.47 |
| STM2696 | 91     | STM0350 | 61.765 | STM2696 | 85.2  |
| STM2310 | 61.682 |         |        | STM2310 | 10.28 |
| STM2708 | 100    |         |        | STM2708 | 90.8  |

|                        |         |     |         |        |         |     |
|------------------------|---------|-----|---------|--------|---------|-----|
| 1878708 gtcctgatat +   | STM1780 | 100 | STM2987 | 61.165 | STM1780 | 100 |
| 124117 atgctaaaac -    | STM0106 | 100 | STM0878 | 82     | STM0106 | 100 |
| 3508003 atgagtacttc -  | STM3338 | 100 | STM1132 | 73     | STM3338 | 100 |
| 3542399 atgggtggcga -  | STM3372 | 100 | STM2851 | 58.252 | STM3372 | 100 |
| 252815 atgaataactct -  | STM0214 | 100 | STM3208 | 66.346 | STM0214 | 100 |
| 742912 atgacaccaç -    | STM0682 | 100 | STM1488 | 69     | STM0682 | 100 |
| 3562261 atgacgaaar +   | STM3390 | 100 | STM0476 | 84     | STM3390 | 100 |
| 278608 atgctgggatt +   | STM0235 | 100 | STM2285 | 55.446 | STM0235 | 100 |
| 1593722 atgaaactac +   | STM1515 | 100 | STM3176 | 62     | STM1515 | 100 |
| 2053616 atgaaaaaaç -   | STM1964 | 100 | STM2838 | 66     | STM1964 | 100 |
| 3906248 atgatcatcgt +  | STM3710 | 100 | STM2578 | 60     | STM3710 | 100 |
| 2105208 atgaaaaaaç -   | STM2025 | 100 | STM0591 | 66     | STM2025 | 100 |
| 2053151 atgaaaaaac +   | STM1963 | 100 |         |        | STM1963 | 100 |
| 2109690 atgctaacgg -   | STM2031 | 100 | STM3782 | 62.376 | STM2031 | 100 |
| 2081160 atgttcgct -    | STM1997 | 100 | PSLT054 | 73     | STM1997 | 100 |
| 56689 atgagtgactç +    | STM0046 | 100 | STM0648 | 61     | STM0046 | 100 |
| 95061 atgaaaaaaç -     | STM0082 | 100 | STM0918 | 64     | STM0082 | 100 |
| 3478151 atgcaaacgç -   | STM3311 | 100 | STM0161 | 90.196 | STM3311 | 100 |
| 375715 atgaaactgg +    | STM0331 | 100 | STM1812 | 71     | STM0331 | 100 |
| 1157808 atgaagaga +    | STM1066 | 100 | STM1255 | 50.962 | STM1066 | 100 |
| 1197270 atgatgaaaç +   | STM1109 | 100 |         |        | STM1109 | 100 |
| 1240489 atgaataaaaç +  | STM1151 | 100 | STM0222 | 60.396 | STM1151 | 100 |
| 1284265 atgggcagta +   | STM1200 | 100 | STM1798 | 65.094 | STM1200 | 100 |
| 1306756 atgtattacgg +  | STM1220 | 100 | PSLT030 | 63.551 | STM1220 | 100 |
| 1221358 atgaaaatca +   | STM1131 | 100 | STM4051 | 65     | STM1131 | 100 |
| 1271557 atgaaaagaç -   | STM1185 | 100 | STM3370 | 76     | STM1185 | 100 |
| 1296476 gtgaataaaatç + | STM1212 | 100 | STM1576 | 68.317 | STM1212 | 100 |
| 3698734 atgaaaaagç -   | STM3533 | 100 | STM2292 | 66     | STM3533 | 100 |
| 3740943 atgaaaaaaç +   | STM3572 | 100 | STM3765 | 58.416 | STM3572 | 100 |
| 4822210 atgccgttggç +  | STM4567 | 100 | STM3541 | 63     | STM4567 | 100 |
| 1347384 atgacgctgtç +  | STM1264 | 100 | STM3323 | 55     | STM1264 | 100 |
| 1368358 atgattaataa -  | STM1289 | 100 |         |        | STM1289 | 100 |
| 4826470 atgaaatcca -   | STM4571 | 100 | STM3690 | 50.495 | STM4571 | 100 |
| 2799 atgcgagtgt +      | STM0002 | 100 | STM4101 | 76     | STM0002 | 100 |
| 2887356 atggaactca +   | STM2746 | 100 | STM4495 | 61.468 | STM2746 | 100 |
| 2904897 atgttaataatç - | STM2762 | 100 |         |        | STM2762 | 100 |
| 4807986 atgagtctgç -   | STM4549 | 100 | STM1179 | 68.317 | STM4549 | 100 |

|                        |         |             |                |       |
|------------------------|---------|-------------|----------------|-------|
| 4846346 atgcgcatcg +   | STM4589 | 100 STM4230 | 70 STM4589     | 100   |
| 329476 atgatggcag +    | STM0288 | 100 STM0657 | 64.151 STM0288 | 100   |
| 2906919 ttgcaggcgg -   | STM2764 | 100 STM0298 | 77 STM2764     | 100   |
| 2938818 atgattctgatç + | STM2789 | 100 STM3058 | 92 STM2789     | 100   |
| 1183644 atggtaagtt:-   | STM1095 | 100 STM3183 | 62.857 STM1095 | 100   |
| 2501562 atgcgtcagg -   | STM2389 | 100 STM3982 | 63 STM2389     | 100   |
| 2538784 atgaaactttt +  | STM2425 | 100 STM2253 | 64.356 STM2425 | 100   |
| 2589166 atgaaatttac +  | STM2478 | 100 STM3158 | 62 STM2478     | 100   |
| 1028356 atgtcaagtc -   | STM0950 | 100 STM3761 | 85 STM0950     | 100   |
| 1067464 atgactgaatç +  | STM0981 | 100 STM3282 | 62 STM0981     | 100   |
| 1110556 atggcgcacç +   | STM1020 | 100 STM2620 | 100 STM1020    | 100   |
| 1031581 atgcgctcgg -   | STM0955 | 100 STM2123 | 61 STM0955     | 100   |
| 2707616 gtgagcgacç -   | STM2564 | 100 STM4058 | 67 STM2564     | 100   |
| 4240403 gtgcatgttatç - | STM4031 | 100 STM1285 | 87 STM4031     | 100   |
| 4324480 atggaactctç -  | STM4109 | 100 STM4589 | 64 STM4109     | 100   |
| 3013791 gtgataccgg -   | STM2868 | 100 STM2477 | 54 STM2868     | 100   |
| 4573198 atggctcgcç +   | STM4327 | 100 STM4050 | 67.925 STM4327 | 100   |
| 2602817 atgcaaaagç -   | STM2487 | 100         | STM2487        | 100   |
| 2676017 gtgattcctatç - | STM2535 | 100 STM3201 | 63.551 STM2535 | 100   |
| 2716568 atggataaga -   | STM2570 | 100 STM0168 | 61.386 STM2570 | 100   |
| 4254955 atgagctttatç - | STM4044 | 100 STM2461 | 75 STM4044     | 99.74 |
| 4295850 atgactgaaa -   | STM4086 | 100 STM0685 | 60.784 STM4086 | 100   |
| 4341301 atgatgaatç +   | STM4122 | 100 STM3789 | 59 STM4122     | 100   |
| 2391864 atgaaaactç +   | STM2284 | 100 STM3319 | 82.178 STM2284 | 100   |
| 4751839 atgaaaaacç -   | STM4498 | 100 STM4018 | 64.356 STM4498 | 100   |
| 4784268 atgaacaaat -   | STM4526 | 100 STM2463 | 70.297 STM4526 | 100   |
| 2020127 atgaaaaatç -   | STM1922 | 100         | STM1922        | 100   |
| 1403693 atgacgtatç +   | STM1323 | 100 PSLT042 | 61.905 STM1323 | 100   |
| 421647 atgtctaccç +    | STM0370 | 100         | STM0370        | 100   |
| 4459857 atgaaagcgt +   | STM4237 | 100 STM0797 | 62.376 STM4237 | 100   |
| 3007285 atgacgaatç +   | STM2861 | 100 STM3328 | 54 STM2861     | 100   |
| 1520835 atgattaacç -   | STM1445 | 100 STM3645 | 62.376 STM1445 | 100   |
| 4636257 atggtagatç +   | STM4398 | 100 STM0400 | 78 STM4398     | 100   |
| 4668919 atgactttaaa +  | STM4425 | 100 STM2514 | 60.194 STM4425 | 100   |
| 4691370 gtgcgattccc +  | STM4448 | 100         | STM4448        | 100   |
| 4641503 atgattaagtt -  | STM4403 | 100 STM1832 | 63.366 STM4403 | 100   |
| 4671193 atgatgaagc +   | STM4427 | 100 STM2928 | 76 STM4427     | 100   |
| 4698219 atgagcaaaç -   | STM4454 | 100 STM2810 | 60.396 STM4454 | 100   |
| 4746939 atgaatacca -   | STM4495 | 100 STM4023 | 64 STM4495     | 100   |
| 4795832 atgattgttttt + | STM4536 | 100 STM3493 | 62.376 STM4536 | 100   |
| 1341731 atgaaattgtt +  | STM1256 | 100 STM4147 | 63.725 STM1256 | 100   |
| 1571230 atgagattcaç -  | STM1493 | 100 STM2165 | 61.682 STM1493 | 100   |
| 4004435 atgcacgctç +   | STM3801 | 100 STM4482 | 68 STM3801     | 100   |
| 4029187 atgtcaacgc +   | STM3826 | 100 STM2271 | 73 STM3826     | 100   |
| 410169 atggagtttga +   | STM0360 | 100 STM0740 | 68 STM0360     | 100   |
| 91747 atgtccgaag +     | STM0077 | 100 STM1352 | 73 STM0077     | 100   |
| 176080 atggcctaca +    | STM0151 | 100 STM1541 | 64 STM0151     | 100   |
| 4461360 atgccgctttt +  | STM4238 | 100 STM1693 | 56.731 STM4238 | 100   |
| 2441063 atgataaatç -   | STM2330 | 100 STM1487 | 62.745 STM2330 | 100   |
| 1421943 atgtctcaattç + | STM1342 | 100 STM0771 | 75.248 STM1342 | 100   |
| 938182 atgctgaaaa -    | STM0865 | 100 STM0875 | 64.762 STM0865 | 100   |
| 1534348 atgaatactat -  | STM1458 | 100 STM3666 | 65.094 STM1458 | 100   |

|         |                |         |     |         |        |         |       |
|---------|----------------|---------|-----|---------|--------|---------|-------|
| 1579393 | gtgatgcccg -   | STM1499 | 100 | STM0964 | 84     | STM1499 | 100   |
| 1580669 | gtgatacgtgt +  | STM1501 | 100 | STM0662 | 66.019 | STM1501 | 100   |
| 3992232 | atgacaacac -   | STM3791 | 100 | STM3455 | 71     | STM3791 | 100   |
| 2720610 | atgtcggcatc -  | STM2574 | 100 | STM1576 | 61.165 | STM2574 | 100   |
| 460624  | atgcgcggtac +  | STM0404 | 100 | STM1548 | 66.337 | STM0404 | 100   |
| 4415432 | atggcaaaa +    | STM4192 | 100 | STM2482 | 62.136 | STM4192 | 100   |
| 2481274 | atgtccggac -   | STM2368 | 100 | STM2323 | 67.925 | STM2368 | 100   |
| 391697  | atgataaattc +  | STM0347 | 100 | PSLT097 | 63.462 | STM0347 | 100   |
| 2661485 | atggtaacct -   | STM2527 | 100 | STM3666 | 61.386 | STM2527 | 100   |
| 518538  | gtgcgattattt + | STM0460 | 100 | STM2020 | 64     | STM0460 | 100   |
| 622619  | atggataaat +   | STM0566 | 100 | STM1749 | 62.617 | STM0566 | 100   |
| 1408534 | atggtgaaa +    | STM1329 | 100 | STM4522 | 59.434 | STM1329 | 100   |
| 4645840 | atgagtttattt - | STM4408 | 100 | STM3772 | 51.485 | STM4408 | 100   |
| 4720350 | atgacaacgc -   | STM4476 | 100 | STM3616 | 62.136 | STM4476 | 100   |
| 2788450 | atgaacgatg -   | STM2648 | 100 | STM0821 | 61.165 | STM2648 | 100   |
| 3362099 | atggatgatgl +  | STM3199 | 100 | STM2253 | 61.386 | STM3199 | 100   |
| 3408726 | atgaaggtaa -   | STM3241 | 100 | STM0973 | 88     | STM3241 | 100   |
| 3441268 | atggagctgc +   | STM3274 | 100 | PSLT033 | 67     | STM3274 | 100   |
| 4309448 | atggctgaat -   | STM4099 | 100 |         |        | STM4099 | 100   |
| 1463998 | atgaatgata -   | STM1380 | 100 | STM0861 | 52.427 | STM1380 | 100   |
| 527284  | atgacagag -    | STM0471 | 100 |         |        | STM0471 | 100   |
| 2941582 | atgcaactta +   | STM2791 | 100 | STM4519 | 71.845 | STM2791 | 100   |
| 2753832 | gtgcaacgta -   | STM2605 | 100 | STM2062 | 62.376 | STM2605 | 100   |
| 2779396 | atgcagaaa -    | STM2639 | 100 |         |        | STM2639 | 100   |
| 3355467 | atgtttgacca +  | STM3191 | 100 | STM4098 | 74     | STM3191 | 100   |
| 3803466 | atgagcgccc -   | STM3619 | 100 | STM0285 | 63     | STM3619 | 100   |
| 3438270 | atgagtaaga +   | STM3269 | 100 | STM2212 | 90     | STM3269 | 100   |
| 1499391 | atgtcttacc +   | STM1419 | 100 | STM1979 | 72     | STM1419 | 100   |
| 2614110 | gtgaccgata +   | STM2499 | 100 | STM1177 | 63.636 | STM2499 | 100   |
| 1213488 | atggctattag +  | STM1125 | 100 | STM0911 | 63.107 | STM1125 | 100   |
| 2955596 | atgaaattatc +  | STM2808 | 100 | STM3056 | 66.99  | STM2808 | 100   |
| 310826  | atgaaacaa -    | STM0271 | 100 | STM3570 | 60.55  | STM0271 | 100   |
| 3026736 | atggttaca -    | STM2882 | 100 | STM2882 | 54     | STM2882 | 100   |
| 3659609 | atgaggcga -    | STM3501 | 100 | STM2130 | 65.049 | STM3501 | 100   |
| 1787166 | atgccttacg +   | STM1694 | 100 | STM3628 | 65     | STM1694 | 100   |
| 4258777 | atgacttttcg -  | STM4047 | 100 | STM3685 | 74     | STM4047 | 100   |
| 612214  | atgcgcgagc -   | STM0550 | 100 | STM1950 | 61.165 | STM0550 | 100   |
| 1310854 | atgccgattac -  | STM1224 | 100 | STM1602 | 62.136 | STM1224 | 100   |
| 1249561 | atgactgcac -   | STM1163 | 100 | STM0971 | 62.376 | STM1163 | 100   |
| 3620956 | atgagcgata -   | STM3470 | 100 | STM3028 | 60.377 | STM3470 | 100   |
| 4248839 | atgaacaata +   | STM4038 | 100 | STM3010 | 66.981 | STM4038 | 100   |
| 703924  | atgaaacga -    | STM0640 | 100 | STM1910 | 79     | STM0640 | 100   |
| 296807  | atgaaagcc -    | STM0256 | 100 | STM2424 | 66     | STM0256 | 100   |
| 1533777 | atgcctaaact -  | STM1457 | 100 | STM2053 | 62.136 | STM1457 | 100   |
| 3029086 | atgtaattagi -  | STM2884 | 100 | STM0521 | 62     | STM2884 | 100   |
| 1257041 | atgactcgttt -  | STM1171 | 100 | STM0078 | 49     | STM1171 | 100   |
| 4476038 | atggataaga -   | STM4254 | 100 | STM0891 | 66.038 | STM4254 | 100   |
| 2826966 | atgacgaag +    | STM2688 | 100 | STM3706 | 57.143 | STM2688 | 91.48 |
| 41624   | atgaaaaga +    | STM0035 | 100 |         |        | STM0035 | 100   |
| 4359644 | atgagtataa -   | STM4139 | 100 |         |        | STM4139 | 100   |
| 3879358 | atggcaaaa -    | STM3688 | 100 |         |        | STM3688 | 100   |
| 4075493 | atggctactgc -  | STM3865 | 100 |         |        | STM3865 | 100   |

|                       |         |     |         |        |         |       |
|-----------------------|---------|-----|---------|--------|---------|-------|
| 449381 atgaaaattct-   | STM0395 | 100 | PSLT104 | 71.569 | STM0395 | 99.9  |
| 3033645 atggatgattt:- | STM2889 | 100 | STM1420 | 63     | STM2889 | 100   |
| 2138660 atgaatcattt:- | STM2064 | 100 | STM1385 | 67     | STM2064 | 96.98 |
| 2013739 atgagtaaaa-   | STM1917 | 100 | STM4005 | 70.588 | STM1917 | 100   |
| 1802999 gtgaaatattt:- | STM1709 | 100 | STM3589 | 57.547 | STM1709 | 100   |
| 1476805 atgaaagaai-   | STM1391 | 100 | STM1767 | 60.577 | STM1391 | 100   |
| 3917862 atgagagttg:-  | STM3722 | 100 |         |        | STM3722 | 100   |
| 391932 atgaaaaagi+    | STM0348 | 100 | STM4522 | 61     | STM0348 | 100   |
| 4379863 atgaatgacc-   | STM4162 | 100 | STM0845 | 66     | STM4162 | 100   |
| 4195124 atgcattttcg+  | STM3986 | 100 | STM0851 | 60.185 | STM3986 | 100   |
| 2656145 gtggcaaaa:-   | STM2522 | 100 |         |        | STM2522 | 100   |
| 4133658 gtgcaggtaa+   | STM3924 | 100 | STM4036 | 62.136 | STM3924 | 100   |
| 4115384 atggcggaat+   | STM3905 | 100 | STM3244 | 66     | STM3905 | 100   |
| 1856884 atgattgaact-  | STM1762 | 100 | STM1579 | 77     | STM1762 | 100   |
| 1890318 atgagcaacç+   | STM1791 | 100 | STM1533 | 64.706 | STM1791 | 100   |
| 1830638 atgaagcagt+   | STM1735 | 100 | STM3149 | 62.136 | STM1735 | 100   |
| 169266 atgccgcctc:-   | STM0145 | 100 | STM0789 | 80     | STM0145 | 100   |
| 480157 atgctaatttg:-  | STM0426 | 100 | STM0479 | 60.194 | STM0426 | 100   |
| 4243846 atgaaacga:-   | STM4035 | 100 | STM1568 | 74     | STM4035 | 100   |
| 1483087 atggcatatct+  | STM1395 | 100 | STM1181 | 93     | STM1395 | 100   |
| 609682 atgaaaatat:+   | STM0547 | 100 | STM0024 | 64     | STM0547 | 100   |
| 4153790 atgaagcaar+   | STM3948 | 100 | STM3009 | 53.846 | STM3948 | 100   |
| 4118852 atggctaact:+  | STM3909 | 100 | STM2465 | 59.406 | STM3909 | 100   |
| 215292 atgacactac-    | STM0184 | 100 | STM2641 | 57     | STM0184 | 99.78 |
| 1930354 atggagattar+  | STM1831 | 100 | STM0575 | 65.049 | STM1831 | 100   |
| 1882909 atgggattca:+  | STM1784 | 100 | STM0239 | 66     | STM1784 | 100   |
| 3040457 gtgctgctttct- | STM2896 | 100 | STM1913 | 76     | STM2896 | 100   |
| 528751 atggacgaat-    | STM0474 | 100 | STM3113 | 61.261 | STM0474 | 100   |
| 1614904 atgcaaacar-   | STM1539 | 100 | STM1786 | 87     | STM1539 | 100   |
| 1595601 atgaatccag-   | STM1516 | 100 | STM0086 | 62.857 | STM1516 | 100   |
| 1049258 atgggaagtç+   | STM0966 | 100 | STM1496 | 89     | STM0966 | 100   |
| 675983 atgagtaatg:+   | STM0611 | 100 | STM0964 | 78     | STM0611 | 100   |
| 1624148 atgacaagat-   | STM1546 | 100 | STM0366 | 60.952 | STM1546 | 100   |
| 1650428 atgtctatgga-  | STM1569 | 100 | STM4036 | 84     | STM1569 | 100   |
| 1693131 atgccaattac+  | STM1602 | 100 | STM1224 | 62.264 | STM1602 | 98.75 |
| 1717504 atgggcaacç:-  | STM1626 | 100 | STM3152 | 84     | STM1626 | 100   |
| 1741539 atgaagaaa:+   | STM1648 | 100 | STM3861 | 88     | STM1648 | 100   |
| 1789691 atgctgcttttt- | STM1697 | 100 | STM3459 | 55     | STM1697 | 100   |
| 569536 atgatagctcç+   | STM0508 | 100 |         |        | STM0508 | 100   |
| 572995 atgattgaaai+   | STM0511 | 100 | STM0247 | 71     | STM0511 | 100   |
| 598962 atggttactttc-  | STM0536 | 100 | STM3472 | 71     | STM0536 | 100   |
| 657430 atggatatgtc+   | STM0595 | 100 | STM2310 | 64     | STM0595 | 100   |
| 2857993 atgaatgcac-   | STM2710 | 100 | STM4040 | 53.846 | STM2710 | 100   |
| 1868146 atgtcattcctc- | STM1768 | 100 | STM2517 | 66.038 | STM1768 | 100   |
| 1908372 atggagatctr+  | STM1806 | 100 | STM1294 | 63.366 | STM1806 | 100   |
| 2872697 gtggcagtgga-  | STM2729 | 100 | STM0580 | 60.577 | STM2729 | 100   |
| 3172685 atgatggcga+   | STM3012 | 100 | STM3011 | 80     | STM3012 | 91.91 |
| 3874084 atgacaagcç-   | STM3683 | 100 | STM0285 | 59.813 | STM3683 | 100   |
| 3949331 atgagttataa-  | STM3752 | 100 | STM3752 | 50     | STM3752 | 100   |
| 3331109 atgagcgcta-   | STM3168 | 100 | STM1383 | 66     | STM3168 | 100   |
| 3164076 atgtccgctct+  | STM3005 | 100 | STM1185 | 59.813 | STM3005 | 100   |
| 3248783 atgagcaaat-   | STM3085 | 100 |         |        | STM3085 | 100   |

|         |                |         |     |         |        |         |       |
|---------|----------------|---------|-----|---------|--------|---------|-------|
| 3300319 | atggctacgtt +  | STM3137 | 100 | STM0758 | 62.376 | STM3137 | 100   |
| 2958210 | atggctgatca +  | STM2810 | 100 | STM0543 | 67.327 | STM2810 | 100   |
| 2948774 | atgttctctcca + | STM2800 | 100 | STM3513 | 60     | STM2800 | 100   |
| 3553717 | atgcagcttgca + | STM3382 | 100 | PSLT034 | 60.577 | STM3382 | 100   |
| 1125929 | ctgaataatgca + | STM1040 | 100 | STM2595 | 80.198 | STM1040 | 100   |
| 3216682 | atggcccaac -   | STM3055 | 100 | STM2551 | 63.366 | STM3055 | 100   |
| 3251637 | atgacagaa(-    | STM3089 | 100 | STM2213 | 86     | STM3089 | 100   |
| 3284773 | atgtcagcctt +  | STM3124 | 100 | STM2246 | 64.423 | STM3124 | 100   |
| 526127  | gtgacaacac -   | STM0468 | 100 | STM4264 | 68     | STM0468 | 100   |
| 3784374 | atgcaagca(-    | STM3609 | 100 | STM4290 | 88     | STM3609 | 100   |
| 4673217 | ctgggtgatat -  | STM4429 | 100 | STM0796 | 84     | STM4429 | 100   |
| 4628953 | atgctgtcgca +  | STM4387 | 100 | STM3676 | 75.248 | STM4387 | 100   |
| 4716871 | atgaataacg +   | STM4474 | 100 | STM4118 | 49     | STM4474 | 100   |
| 4847753 | atggtgaaatc +  | STM4590 | 100 |         |        | STM4590 | 100   |
| 2987640 | atgagtcggg +   | STM2841 | 100 | STM3474 | 71.287 | STM2841 | 100   |
| 2277790 | atggcgaact +   | STM2180 | 100 | STM1713 | 69     | STM2180 | 100   |
| 2163866 | atgaacgtag -   | STM2083 | 100 | STM2088 | 61     | STM2083 | 100   |
| 2949159 | atgtatttacg(-  | STM2801 | 100 | STM2162 | 61.538 | STM2801 | 100   |
| 2291112 | atgccatcac -   | STM2193 | 100 | STM3773 | 49     | STM2193 | 100   |
| 2186966 | atgacaaatc -   | STM2103 | 100 | PSLT016 | 60.577 | STM2103 | 100   |
| 2273623 | atgaagctgt(-   | STM2176 | 100 | STM3342 | 62     | STM2176 | 100   |
| 1898627 | gtgaaattaa(-   | STM1799 | 100 | STM3112 | 62     | STM1799 | 100   |
| 3862459 | atgagcaact +   | STM3674 | 100 | STM3674 | 64.706 | STM3674 | 100   |
| 2340556 | gtgagagcgt(-   | STM2240 | 100 | STM4154 | 68     | STM2240 | 100   |
| 1938462 | atggcaaac(-    | STM1842 | 100 | STM2292 | 71     | STM1842 | 100   |
| 3881184 | atgcacaaa(-    | STM3690 | 100 | STM4571 | 49.038 | STM3690 | 100   |
| 3596530 | atgcagaac(-    | STM3441 | 100 | STM1991 | 61.321 | STM3441 | 100   |
| 4604492 | atgaatgatg(+   | STM4360 | 100 | STM2841 | 60.577 | STM4360 | 100   |
| 3406362 | atgattagcgr(-  | STM3240 | 100 | STM1826 | 87     | STM3240 | 100   |
| 3471391 | atgaagtttgt(-  | STM3301 | 100 | STM3655 | 64.423 | STM3301 | 100   |
| 3384275 | atgtcttctcat - | STM3217 | 100 | STM1919 | 84     | STM3217 | 100   |
| 3304203 | atgagcaaa(-    | STM3139 | 100 | STM3188 | 59     | STM3139 | 100   |
| 3228224 | gtgatatcttat - | STM3066 | 100 | STM4115 | 60.952 | STM3066 | 100   |
| 1261795 | atggatcacg +   | STM1178 | 100 | STM1176 | 65.385 | STM1178 | 100   |
| 3372563 | atgagtgcaa +   | STM3207 | 100 | STM2981 | 64.078 | STM3207 | 100   |
| 1473127 | gtgagaggta +   | STM1386 | 100 | STM2397 | 73     | STM1386 | 100   |
| 3951199 | atgagaatcg +   | STM3753 | 100 | STM3754 | 100    | STM3753 | 77.44 |
| 3357680 | atggattttatt + | STM3194 | 100 | STM4297 | 70.192 | STM3194 | 100   |
| 3263121 | atgcaaaaa(-    | STM3103 | 100 | STM4305 | 63.462 | STM3103 | 100   |
| 3210740 | atgagaaaa(-    | STM3051 | 100 | PSLT095 | 61.386 | STM3051 | 100   |
| 823452  | atgaaaatga -   | STM0759 | 100 | STM3640 | 62     | STM0759 | 100   |
| 3298895 | atggaacag(+    | STM3136 | 100 | STM1508 | 80     | STM3136 | 100   |
| 3234326 | atggcgcgtc +   | STM3072 | 100 | STM4075 | 81.553 | STM3072 | 100   |
| 1193162 | atgctcgata(-   | STM1105 | 100 | STM2838 | 64.078 | STM1105 | 100   |
| 842728  | atggcttttctg - | STM0777 | 100 | STM2638 | 61.386 | STM0777 | 100   |
| 884682  | atgaaaaaa(-    | STM0818 | 100 | STM4024 | 62.5   | STM0818 | 100   |
| 936699  | atgacgcaat +   | STM0863 | 100 | STM0637 | 80     | STM0863 | 100   |
| 524346  | atgctgtttct -  | STM0466 | 100 | STM2560 | 64.486 | STM0466 | 100   |
| 442891  | atgctacaaa +   | STM0391 | 100 | STM0006 | 62.264 | STM0391 | 100   |
| 3287494 | atgcaagcttt -  | STM3127 | 100 | STM1057 | 56.436 | STM3127 | 100   |
| 618919  | atgctgcgca -   | STM0561 | 100 | STM0398 | 61     | STM0561 | 100   |
| 619207  | gtgcggcca(-    | STM0562 | 100 | STM3173 | 59.259 | STM0562 | 100   |

|         |               |         |        |         |        |         |       |
|---------|---------------|---------|--------|---------|--------|---------|-------|
| 2681094 | atgtcgattac - | STM2541 | 100    | STM1369 | 70     | STM2541 | 100   |
| 2068283 | atgaaggtga -  | STM1983 | 100    | STM4275 | 91     | STM1983 | 100   |
| 2331782 | ttgctggaca: + | STM2231 | 100    | STM1056 | 72     | STM2231 | 100   |
| 2281188 | atgatcatgg: + | STM2185 | 100    | STM2564 | 92     | STM2185 | 100   |
| 891273  | atggcatccg -  | STM0825 | 100    | STM4107 | 61.682 | STM0825 | 100   |
| 4691964 | atgacttatga + | STM4450 | 100    | STM1550 | 66     | STM4450 | 100   |
| 4777379 | atgactaccg -  | STM4523 | 100    | STM2814 | 58.654 | STM4523 | 100   |
| 3065449 | atgattgccc +  | STM2923 | 100    |         |        | STM2923 | 100   |
| 1452683 | atggaattgc: + | STM1369 | 100    | STM2541 | 70     | STM1369 | 100   |
| 1207538 | atgaaacga: -  | STM1123 | 100    | STM0353 | 62     | STM1123 | 100   |
| 1459615 | atgaatcgta: - | STM1377 | 100    | STM1376 | 90     | STM1377 | 100   |
| 3838496 | atgcataca: -  | STM3652 | 100    | STM2525 | 56.863 | STM3652 | 100   |
| 3897316 | atgcaagaa: -  | STM3703 | 100    | STM0351 | 57     | STM3703 | 100   |
| 44185   | gtgaatatgtt + | STM0037 | 100    | STM1796 | 63.725 | STM0037 | 100   |
| 84117   | atggatatcgt - | STM0071 | 100    | STM1350 | 61.165 | STM0071 | 100   |
| 46027   | atgaatacgtt + | STM0038 | 100    | STM0032 | 80     | STM0038 | 100   |
| 101318  | atgatcagtct + | STM0087 | 100    | STM0096 | 63.551 | STM0087 | 100   |
| 104470  | atgagcagtg -  | STM0091 | 100    | STM0163 | 66     | STM0091 | 100   |
| 93837   | atgcaaaaa: +  | STM0080 | 100    | STM2983 | 71     | STM0080 | 100   |
| 2770498 | atgcttaa: +   | STM2630 | 100    | STM2525 | 55     | STM2630 | 100   |
| 1722984 | atgatcttaa: - | STM1632 | 100    | STM1993 | 64     | STM1632 | 100   |
| 1781687 | atgagcgcg: -  | STM1689 | 100    |         |        | STM1689 | 100   |
| 1767221 | gtgccaggg: -  | STM1673 | 100    | STM1585 | 69     | STM1673 | 100   |
| 1719098 | atgccgcatt: - | STM1628 | 100    | STM3023 | 66.337 | STM1628 | 100   |
| 3359240 | atggcgtcca +  | STM3196 | 100    | STM2851 | 64.078 | STM3196 | 100   |
| P36777  | atgagcagc: -  | PSLT044 | 100    | PSLT043 | 68     | PSLT044 | 100   |
| P20621  | atgcagttta: + | PSLT028 | 100    | STM1349 | 71.845 | PSLT028 | 100   |
| P72231  | gtgaaatggc +  | PSLT091 | 100    | STM2104 | 75.248 | PSLT091 | 100   |
| P26917  | atgagagttc: - | PSLT037 | 100    | STM3713 | 56.436 | PSLT037 | 100   |
| P53123  | atgtacggaa +  | PSLT063 | 100    | STM2458 | 87     | PSLT063 | 100   |
| P79850  | atgcagggtg +  | PSLT100 | 100    | STM0769 | 66.337 | PSLT100 | 100   |
| R27780  | -             | STM3135 | 52.475 | STM3848 | 47.115 | STM3135 | 12.4  |
| R28633  | +             | STM1998 | 64     | PSLT055 | 61     | STM1998 | 46.98 |
| R9475   | +             | STM4153 | 63.462 | STM0408 | 60     | STM4153 | 6.7   |
| R24551  | -             | STM2451 | 41.346 | STM3251 | 39     | STM2451 | 8.37  |
| R4184   | +             | STM0487 | 48.039 | STM0252 | 37     | STM0487 | 17.24 |
| P06538  | atgatgtgga: - | PSLT010 | 100    | STM1154 | 59.813 | PSLT010 | 100   |
|         |               | STM0893 | 100    | STM1005 | 75     | STM0893 | 100   |
|         |               | STM2771 | 100    | STM1959 | 98     | STM2771 | 100   |
|         |               | STM0914 | 100    | STM2600 | 74     | STM0914 | 100   |
|         |               | STM0916 | 100    | STM2597 | 78     | STM0916 | 100   |
| 994333  | atgaaaaag: +  | STM0922 | 100    | STM1046 | 78     | STM0922 | 100   |
| 3272711 | atgaatcctaa + | STM3113 | 100    | STM2421 | 73     | STM3113 | 100   |
|         |               | STM1922 | 63.208 | STM0220 | 50     | STM1922 | 23.09 |
|         |               | STM3052 | 58     |         |        | STM3052 | 34.48 |
|         |               | STM2677 | 58.095 |         |        | STM2677 | 6.97  |
|         |               | STM1338 | 52.427 | STM0002 | 52.381 | STM0002 | 10.94 |
|         |               | STM0437 | 98.02  | STM4010 | 78     | STM0437 | 92.16 |
|         |               | STM1012 | 60.377 | STM2628 | 60.377 | STM1012 | 31.17 |

|         |        |         |        |         |       |
|---------|--------|---------|--------|---------|-------|
| STM3629 | 59.804 | STM0994 | 53     | STM3629 | 25.91 |
| PSLT047 | 39     | STM1913 | 35     | PSLT047 | 27.07 |
| STM4213 | 87     | STM2701 | 61.765 | STM4213 | 69.56 |
| STM1450 | 100    | STM2435 | 59.406 | STM1450 | 95.93 |
| STM2293 | 62.5   | STM0928 | 49.057 | STM2293 | 12.34 |
| STM2754 | 62.264 | STM3845 | 60.396 | STM4157 | 15.03 |
| STM1009 | 79     | STM1870 | 79     | STM1009 | 24.88 |
| STM1358 | 83     | STM1368 | 65.347 | STM1358 | 72.9  |
| STM2701 | 58.095 |         |        | STM2701 | 23.86 |
| STM2738 | 69     | STM2175 | 48.515 | STM2738 | 22.11 |
| STM2721 | 94     |         |        | STM2721 | 83.6  |
| STM2503 | 59.223 | STM2584 | 56.863 | STM2503 | 8.15  |
| STM4448 | 58.416 |         |        | STM4448 | 4.24  |
| STM3690 | 64.423 | STM4315 | 59.406 | STM3690 | 6.68  |
| STM0691 | 63.107 | STM4114 | 62.745 | STM0691 | 2.71  |
| STM3655 | 100    | STM1764 | 65     | STM3655 | 90    |
| STM0979 | 66.99  | STM1057 | 58.824 | STM0979 | 13.14 |

|                       |         |     |         |        |         |     |
|-----------------------|---------|-----|---------|--------|---------|-----|
| 1314646 atggataaac +  | STM1227 | 100 | STM0233 | 51.456 | STM1227 | 100 |
| 148716 atggctgatta +  | STM0126 | 100 | STM4456 | 73     | STM0126 | 100 |
| 189357 atgggaacct -   | STM0159 | 100 | STM2036 | 60     | STM0159 | 100 |
| 213277 atgaaaccce -   | STM0182 | 100 | STM0067 | 67     | STM0182 | 100 |
| 275946 atgggattgc +   | STM0233 | 100 | STM2502 | 55     | STM0233 | 100 |
| 1592256 atggcagaa +   | STM1513 | 100 | STM1728 | 84     | STM1513 | 100 |
| 229717 gtgagcaga +    | STM0194 | 100 | STM4281 | 63     | STM0194 | 100 |
| 725526 atgtttggcgt -  | STM0660 | 100 |         |        | STM0660 | 100 |
| 759006 atgaaattaa -   | STM0696 | 100 | STM2424 | 70     | STM0696 | 100 |
| 4030550 atggtgagcg -  | STM3827 | 100 | STM3698 | 72     | STM3827 | 100 |
| 4053275 ttgacggcac +  | STM3846 | 100 | STM2066 | 62.745 | STM3846 | 100 |
| 4089246 atggctcacc -  | STM3879 | 100 | STM1818 | 63.107 | STM3879 | 100 |
| 4046422 atggcgccgc +  | STM3841 | 100 | STM2309 | 73     | STM3841 | 100 |
| 4068884 atgacaacc +   | STM3860 | 100 | STM0109 | 76     | STM3860 | 100 |
| 15961 atgggatcga +    | STM0014 | 100 | STM0030 | 63     | STM0014 | 100 |
| 2513521 atgtaacaat +  | STM2399 | 100 | STM3787 | 65.347 | STM2399 | 100 |
| 840570 atgaccccat -   | STM0775 | 100 | STM0096 | 64.423 | STM0775 | 100 |
| 161941 atgaaaaaa +    | STM0137 | 100 | STM1301 | 74.257 | STM0137 | 100 |
|                       | STM2778 | 100 | STM2779 | 100    | STM2778 | 100 |
| 1174927 atggatcgat -  | STM1085 | 100 | STM0125 | 56.481 | STM1085 | 100 |
| 3574661 gtgaataata -  | STM3402 | 100 | STM4188 | 81     | STM3402 | 100 |
| 3609567 atgtctcagcc - | STM3458 | 100 | STM0085 | 59     | STM3458 | 100 |
| 3653052 atgcatattga + | STM3496 | 100 |         |        | STM3496 | 100 |
| 1337365 atgaaattagi + | STM1252 | 100 |         |        | STM1252 | 100 |
| 3603486 atgaaacgta -  | STM3450 | 100 | STM1457 | 54     | STM3450 | 100 |

|                       |         |     |         |        |         |       |
|-----------------------|---------|-----|---------|--------|---------|-------|
| 3642748 atggcagag:-   | STM3487 | 100 | STM2404 | 61.538 | STM3487 | 100   |
| 1321508 gtgattgtggc-  | STM1233 | 100 | STM0643 | 82     | STM1233 | 100   |
| 1354071 atgaaatttac+  | STM1275 | 100 | STM1212 | 61.765 | STM1275 | 100   |
| 2188390 atgacaaaat-   | STM2104 | 100 | STM2253 | 66     | STM2104 | 100   |
| 2226730 gtggaatttctt+ | STM2133 | 100 | STM3769 | 78.641 | STM2133 | 98.33 |
| 3706098 atgacgcagc-   | STM3537 | 100 | STM1558 | 74     | STM3537 | 100   |
| 3741595 atgagtaagc-   | STM3574 | 100 | STM1646 | 58.491 | STM3574 | 100   |
| 2229568 atggaacagc+   | STM2135 | 100 |         |        | STM2135 | 100   |
| 2868678 atgaaatcaa-   | STM2724 | 100 | STM0293 | 71.287 | STM2724 | 100   |
| 340702 atggctcgatt-   | STM0296 | 100 | STM0517 | 58.252 | STM0296 | 100   |
| 372641 ttgtgatgaa:+   | STM0328 | 100 | STM1486 | 65.385 | STM0328 | 100   |
| 2212357 atgtttaccctc- | STM2124 | 100 | STM3335 | 64     | STM2124 | 100   |
|                       | STM2713 | 100 | STM2714 | 100    | STM2714 | 100   |
| 2888729 atgcctgaag-   | STM2748 | 100 |         |        | STM2748 | 100   |
| 374822 atggatacgtt+   | STM0330 | 100 | STM1981 | 53     | STM0330 | 100   |
| 1156825 atggaaccta+   | STM1064 | 100 | STM4062 | 70     | STM1064 | 100   |
| 1552020 atgaaccgc:-   | STM1475 | 100 | STM3502 | 67.308 | STM1475 | 100   |
| 955869 atggaggggc+    | STM0884 | 100 | STM4383 | 67.961 | STM0884 | 100   |
| 976222 atgtggatga:+   | STM0905 | 100 |         |        | STM0905 | 100   |
|                       | STM0922 | 100 | STM0923 | 100    | STM0922 | 100   |
| 2662294 atgcatgagtt-  | STM2528 | 100 | STM4307 | 61.386 | STM2528 | 100   |
| 2705411 atgataagcc-   | STM2562 | 100 | STM0652 | 77     | STM2562 | 100   |
| 1118995 atgatgacaa+   | STM1031 | 100 | STM0910 | 86     | STM1031 | 100   |
| 1053512 atgtatttaga-  | STM0970 | 100 | STM4565 | 63.107 | STM0970 | 100   |
| 1086861 atgttgcttaat+ | STM0995 | 100 | STM4357 | 66.019 | STM0995 | 100   |
| 4272145 atgaatcaaa+   | STM4061 | 100 | STM1499 | 80.392 | STM4061 | 100   |
| 4443933 atgatgaaa+    | STM4224 | 100 | STM2842 | 61.165 | STM4224 | 100   |
| 3053282 atgaatccat:-  | STM2910 | 100 | STM1753 | 61.111 | STM2910 | 100   |
| 4583989 atggctgaga-   | STM4342 | 100 | STM0735 | 72.277 | STM4342 | 100   |
| 1002017 atgccttttaa:+ | STM0927 | 100 | STM1050 | 95     | STM0927 | 100   |
| 1058295 gtgaaagctg-   | STM0974 | 100 | STM1584 | 62.857 | STM0974 | 100   |
| 1099520 atggctaagc-   | STM1005 | 100 | STM0893 | 81     | STM1005 | 100   |
| 4412022 atgtctcatgtt+ | STM4188 | 100 | STM3384 | 64     | STM4188 | 100   |
| 4314281 atggaagggtt-  | STM4102 | 100 | STM3067 | 78     | STM4102 | 100   |
| 4473081 atggaaaac:-   | STM4253 | 100 | STM1928 | 61.386 | STM4253 | 100   |
| 4710545 atggaaaagr-   | STM4467 | 100 | STM0143 | 60.952 | STM4467 | 100   |
| 2446574 atgcctgagg-   | STM2334 | 100 | STM3836 | 64.22  | STM2334 | 100   |
| 2474300 atggcatcca+   | STM2361 | 100 | STM2562 | 68.627 | STM2361 | 100   |
| 1292596 gtgcggtcca+   | STM1208 | 100 |         |        | STM1208 | 100   |
| 3280538 atggaactgc+   | STM3121 | 100 | STM1487 | 64     | STM3121 | 100   |
| 1250998 gtgaagcttta-  | STM1165 | 100 | STM2341 | 61.321 | STM1165 | 100   |
| 4378155 atgaaaacct-   | STM4159 | 100 | STM1692 | 56.311 | STM4159 | 100   |
| 1401466 atgaattttcc:- | STM1320 | 100 | STM1368 | 72     | STM1320 | 100   |
| 4599914 atgatggacc+   | STM4356 | 100 | STM2252 | 64.151 | STM4356 | 100   |
| 2084931 atggcattaar+  | STM2005 | 100 | STM3655 | 85     | STM2005 | 100   |
| 2359645 atggttgattta- | STM2261 | 100 | STM3014 | 63.366 | STM2261 | 100   |
| 2399431 atggagaata-   | STM2291 | 100 | STM3828 | 66     | STM2291 | 100   |
| 2088615 atgcccctcc+   | STM2007 | 100 | STM1760 | 64.151 | STM2007 | 100   |
| 2362405 atggaacttct-  | STM2263 | 100 | STM1696 | 64.356 | STM2263 | 100   |
| 2402423 atgttttggaa-  | STM2294 | 100 | STM3158 | 63.462 | STM2294 | 100   |
| 2443209 atgtcccccac+  | STM2331 | 100 | STM0370 | 58.416 | STM2331 | 100   |
| 2482287 atgtctgaagc-  | STM2369 | 100 |         |        | STM2369 | 100   |



|         |               |         |     |          |        |         |       |
|---------|---------------|---------|-----|----------|--------|---------|-------|
| 1393568 | atgagtaacg +  | STM1313 | 100 | STM2528  | 59.406 | STM1313 | 100   |
| 1495701 | atgcgttcatg + | STM1414 | 100 | STM2896  | 75     | STM1414 | 100   |
| 4085157 | atggaaaatt:-  | STM3876 | 100 |          |        | STM3876 | 100   |
| 346568  | atgtggatga: + | STM0302 | 100 | STM0046  | 61.321 | STM0302 | 100   |
| 269524  | atgatcgaatt + | STM0230 | 100 |          |        | STM0230 | 100   |
| 4456082 | atggagtgga +  | STM4234 | 100 | STM2253  | 61.765 | STM4234 | 100   |
| 2500252 | atgactacca -  | STM2388 | 100 | STM3983  | 66.337 | STM2388 | 100   |
| 154363  | atgtcgcagg +  | STM0131 | 100 | STM3773  | 66     | STM0131 | 100   |
| 1384445 | atgcggtgga +  | STM1304 | 100 | STM1106  | 62.5   | STM1304 | 100   |
| 1434487 | atgaatcatt:-  | STM1353 | 100 | STM0076  | 78     | STM1353 | 100   |
| 1457834 | atggctgcgc +  | STM1374 | 100 | STM2985  | 58     | STM1374 | 100   |
| 1658297 | atgttcgtca:-  | STM1574 | 100 | STM2221  | 67     | STM1574 | 100   |
| 1497727 | atgcgtattac + | STM1417 | 100 | STM2160  | 61.165 | STM1417 | 100   |
| 456022  | atggaaagc: +  | STM0400 | 100 | STM4398  | 78     | STM0400 | 100   |
| 2354285 | atggaaaatt:-  | STM2255 | 100 | STM3823  | 68     | STM2255 | 100   |
| 2718436 | atgaactgtt:-  | STM2572 | 100 | STM3248  | 63.366 | STM2572 | 100   |
| 2149255 | atgaaaaag:-   | STM2070 | 100 | STM3827  | 55.446 | STM2070 | 100   |
| 123371  | atgcaagca: +  | STM0105 | 100 | STM2367  | 63.462 | STM0105 | 100   |
| 168151  | atggaaaaa:-   | STM0144 | 100 | STM3000  | 61.386 | STM0144 | 100   |
| 2376347 | atgagcgacc:-  | STM2272 | 100 | STM3174  | 76     | STM2272 | 100   |
| 2556441 | atggccgtaa:-  | STM2444 | 100 | STM4063  | 72     | STM2444 | 100   |
| 896120  | atgcagttga -  | STM0829 | 100 | STM0663  | 60     | STM0829 | 100   |
| 2097225 | atgcgctgat -  | STM2015 | 100 | STM0837  | 79     | STM2015 | 100   |
| 653572  | atgcatgctc -  | STM0592 | 100 | STM0770  | 66     | STM0592 | 100   |
| 2750054 | atgaaaggg:-   | STM2600 | 100 | STM0914  | 90     | STM2600 | 100   |
| 2758721 | atgaaattca: + | STM2610 | 100 | PSLT047  | 91     | STM2610 | 100   |
| 3946894 | atgaaaatta:-  | STM3749 | 100 | STM3059  | 61.682 | STM3749 | 100   |
| 3816029 | atgagtatttc:- | STM3630 | 100 | STM3796A | 65.686 | STM3630 | 100   |
| 3727677 | atgatatcgtt:- | STM3557 | 100 | STM4466  | 60.396 | STM3557 | 100   |
| 1030256 | atgataaaa +   | STM0952 | 100 | STM2912  | 66.019 | STM0952 | 100   |
| 2652929 | atggctacctg - | STM2519 | 100 | STM1804  | 61.321 | STM2519 | 100   |
| 534407  | atggcacga: +  | STM0477 | 100 | STM3389  | 75     | STM0477 | 100   |
| 575776  | atgttgacct -  | STM0514 | 100 | STM2424  | 62     | STM0514 | 100   |
| 4637031 | atggcttatcg - | STM4399 | 100 | STM2160  | 64.151 | STM4399 | 100   |
| 4762839 | atgaacacct -  | STM4508 | 100 | STM2489  | 62.5   | STM4508 | 100   |
| 4838826 | gtggctcaatt - | STM4581 | 100 | STM0838  | 69     | STM4581 | 100   |
| 3844738 | atggacgatc -  | STM3659 | 100 | STM3928  | 61     | STM3659 | 100   |
| 3400908 | atggctaaag -  | STM3235 | 100 | STM2069  | 69     | STM3235 | 100   |
| 3638672 | atgaaacagt -  | STM3483 | 100 | STM1617  | 66.99  | STM3483 | 100   |
| 4041269 | atgtcgaattc - | STM3835 | 100 | STM3181  | 80     | STM3835 | 100   |
| 2156146 | atgctggcaa +  | STM2077 | 100 | STM0450  | 64.078 | STM2077 | 100   |
| 468400  | atgaaaaaa:-   | STM0413 | 100 | STM4261  | 59.406 | STM0413 | 100   |
| 1801324 | atgacgtttac - | STM1707 | 100 |          |        | STM1707 | 100   |
| 3579749 | atgaaaaaa +   | STM3408 | 100 | STM1850  | 63.725 | STM3408 | 100   |
| 3642170 | atggagaggi:-  | STM3486 | 100 | STM1075  | 63     | STM3486 | 100   |
| 2050805 | atggcttcaat + | STM1960 | 100 | STM0483  | 72     | STM1960 | 100   |
| 2725507 | atgaacccc:-   | STM2581 | 100 | STM3302  | 61.165 | STM2581 | 100   |
| 2574800 | atgaatcaac -  | STM2463 | 100 | STM2051  | 74     | STM2463 | 100   |
| 4202199 | atgataccgc -  | STM3993 | 100 | STM2470  | 63.366 | STM3993 | 97.18 |
| 3036699 | atgcattcgct - | STM2893 | 100 | STM4065  | 49.02  | STM2893 | 100   |
| 1329705 | atgttcgtcga - | STM1241 | 100 | STM1056  | 74     | STM1241 | 100   |
| 3030895 | atggtaaatg:-  | STM2885 | 100 | STM1571  | 62     | STM2885 | 100   |

|         |                |         |     |         |        |         |       |
|---------|----------------|---------|-----|---------|--------|---------|-------|
| 944394  | gtgaatataa:-   | STM0870 | 100 | STM3186 | 62.037 | STM0870 | 100   |
| 918090  | atgaataaag+    | STM0847 | 100 | STM0371 | 68.317 | STM0847 | 100   |
| 3623252 | atgactaaca+    | STM3473 | 100 | STM0125 | 71.845 | STM3473 | 100   |
| 2124437 | atggataaag+    | STM2047 | 100 | STM2144 | 65.347 | STM2047 | 100   |
| 4530047 | atgccgttaaç-   | STM4288 | 100 | STM0182 | 62     | STM4288 | 100   |
| 1994526 | atggcaggtc-    | STM1899 | 100 | STM3768 | 61.321 | STM1899 | 100   |
| 3532905 | gtgaaaaca:-    | STM3365 | 100 | STM4347 | 64.762 | STM3365 | 100   |
| 52543   | ttggctaata:-   | STM0043 | 100 | STM2509 | 59.223 | STM0043 | 100   |
| 309116  | atgagcacgt-    | STM0269 | 100 | STM2249 | 58.824 | STM0269 | 100   |
| 1736488 | atgacgtctgç-   | STM1643 | 100 |         |        | STM1643 | 100   |
| 4231602 | atgaggatgg-    | STM4020 | 100 | STM0492 | 60.952 | STM4020 | 100   |
| 869241  | atgtttaatatt:+ | STM0800 | 100 | STM2241 | 69     | STM0800 | 100   |
| 2126224 | atggcgattta+   | STM2050 | 100 | STM3742 | 63.462 | STM2050 | 100   |
| 4543753 | atgatgacgg+    | STM4298 | 100 | STM1255 | 58     | STM4298 | 100   |
| 2000789 | atgatcgagtt+   | STM1906 | 100 | STM3042 | 70     | STM1906 | 100   |
| 2137197 | atgctgttgaa-   | STM2062 | 100 | STM0863 | 63.725 | STM2062 | 100   |
| 4481183 | atgaagatta:+   | STM4259 | 100 | STM3003 | 89     | STM4259 | 100   |
| 2825868 | gtgccggata-    | STM2686 | 100 | STM2988 | 62.136 | STM2686 | 100   |
| 53810   | atgaagctga+    | STM0045 | 100 | STM3506 | 66.355 | STM0045 | 100   |
| 4692432 | atgcgctacc-    | STM4451 | 100 | STM0813 | 62.963 | STM4451 | 100   |
| 1605698 | atgggtataa:-   | STM1528 | 100 | STM1529 | 100    | STM1528 | 100   |
| 4128176 | gtgaagtact+    | STM3918 | 100 | STM4556 | 76     | STM3918 | 99.9  |
| 4166876 | atgtttcagca+   | STM3961 | 100 | STM3323 | 63.366 | STM3961 | 100   |
| 3133865 | atgaataaag-    | STM2980 | 100 | STM0838 | 61.765 | STM2980 | 99.73 |
| 4363533 | atggctaaga+    | STM4149 | 100 |         |        | STM4149 | 100   |
| 1263344 | atgcaaaaat+    | STM1180 | 100 | STM3485 | 64.151 | STM1180 | 100   |
| 3627456 | atgtttacaga+   | STM3476 | 100 | STM0974 | 59.048 | STM3476 | 100   |
| 3528498 | atgcgaagct+    | STM3360 | 100 | STM4463 | 65.347 | STM3360 | 100   |
| 3101410 | atgacaacta-    | STM2954 | 100 | STM1258 | 60     | STM2954 | 100   |
| 4301021 | gtgacaaca:-    | STM4092 | 100 | STM1509 | 71     | STM4092 | 100   |
| 4191499 | atgctttataa:-  | STM3983 | 100 | STM0070 | 67.647 | STM3983 | 100   |
| 4173713 | ttgtctcatggç+  | STM3966 | 100 | STM0036 | 72     | STM3966 | 100   |
| 4155405 | atgcgtttttac+  | STM3950 | 100 | STM0790 | 64.706 | STM3950 | 100   |
| 4148913 | ttgtacctctat+  | STM3939 | 100 | STM2834 | 70.297 | STM3939 | 100   |
| 1349039 | atggctactttt+  | STM1266 | 100 | STM1390 | 93     | STM1266 | 99.65 |
| 4374236 | gtgaaagattt+   | STM4154 | 100 | STM4337 | 61.165 | STM4154 | 100   |
| 1792924 | atgggttttcttt+ | STM1700 | 100 | STM2758 | 89     | STM1700 | 100   |
| 2014602 | atgacatcatç-   | STM1918 | 100 | STM2689 | 63     | STM1918 | 100   |
| 3116326 | atgctggaga-    | STM2964 | 100 | STM0703 | 64     | STM2964 | 100   |
| 957716  | atgaaagcgç:+   | STM0886 | 100 |         |        | STM0886 | 100   |
| 579248  | atggcaaaaç+    | STM0517 | 100 | STM0116 | 65.347 | STM0517 | 100   |
| 1088344 | atgaactatcç+   | STM0997 | 100 |         |        | STM0997 | 100   |
| 1666664 | atgcaaatcc+    | STM1579 | 100 | STM1762 | 77     | STM1579 | 100   |
| 379739  | atgcgcaattç-   | STM0336 | 100 | STM0339 | 58.252 | STM0336 | 100   |
| 1830042 | atgtctatcac+   | STM1734 | 100 |         |        | STM1734 | 100   |
| 1881701 | atggatctact+   | STM1783 | 100 | STM1172 | 59.223 | STM1783 | 100   |
| 1916907 | ttgaagaagç-    | STM1818 | 100 | STM3983 | 70.588 | STM1818 | 100   |
| 1945895 | atggctctgçç+   | STM1848 | 100 | STM1063 | 64.423 | STM1848 | 100   |
| 1971048 | atgtcctctgç+   | STM1877 | 100 |         |        | STM1877 | 100   |
| 537888  | atgactatgttç+  | STM0478 | 100 | STM4347 | 72     | STM0478 | 100   |
| 676537  | atgagacgtgç+   | STM0612 | 100 | STM1385 | 78     | STM0612 | 100   |
| 689688  | atgtcctgtca+   | STM0625 | 100 | STM0053 | 67     | STM0625 | 100   |

|                        |         |             |                |       |
|------------------------|---------|-------------|----------------|-------|
| 1072183 atgcataacg +   | STM0984 | 100 STM0891 | 72 STM0984     | 100   |
| 666669 atgcaacacc -    | STM0604 | 100 STM4110 | 59 STM0604     | 100   |
| 1698958 atgaccgttc -   | STM1608 | 100 STM2882 | 65 STM1608     | 100   |
| 1656261 atgaaactta +   | STM1572 | 100 STM2267 | 82 STM1572     | 100   |
| 1696215 atggataacc -   | STM1605 | 100 STM1664 | 60.396 STM1605 | 100   |
| 3793687 atggcaatgg -   | STM3615 | 100 STM1703 | 63 STM3615     | 100   |
| 3290972 atgatgacac -   | STM3130 | 100 STM0826 | 65 STM3130     | 100   |
| 3894035 atgaacaca +    | STM3698 | 100 STM2962 | 74 STM3698     | 100   |
| 2995603 atgtctgaag -   | STM2849 | 100         | STM2849        | 100   |
| 3128188 atgggaaac +    | STM2975 | 100 STM3792 | 67 STM2975     | 100   |
| 2842704 atgaccgc +     | STM2691 | 100 STM2441 | 64.356 STM2691 | 100   |
| 469239 atgacaaga -     | STM0414 | 100         | STM0414        | 100   |
| 507896 atgaatcctg +    | STM0450 | 100 STM0747 | 68.317 STM0450 | 100   |
| 3751744 atgcaacgtg +   | STM3584 | 100         | STM3584        | 91.78 |
| 3822267 atgagataca -   | STM3635 | 100 STM4447 | 70.588 STM3635 | 96.74 |
| 3865636 atgctcgaatt -  | STM3678 | 100 STM4117 | 61 STM3678     | 100   |
| 3900401 atgagggga +    | STM3705 | 100 STM3936 | 65.385 STM3705 | 100   |
| 299019 atgcgctatgt +   | STM0258 | 100 PSLT092 | 61.386 STM0258 | 100   |
| 461948 atgaaatttg +    | STM0405 | 100 STM3686 | 54.455 STM0405 | 100   |
| 3307819 atgcatgagc -   | STM3144 | 100 STM2854 | 67 STM3144     | 100   |
| 2964505 atgcaacag +    | STM2815 | 100 STM1574 | 64.356 STM2815 | 100   |
| 3810229 atgcaggac +    | STM3625 | 100 STM3239 | 71.845 STM3625 | 100   |
| 3870561 atgcagcaat +   | STM3681 | 100 PSLT059 | 67.961 STM3681 | 100   |
| 3468406 atgcaagcta -   | STM3299 | 100 STM3503 | 63.462 STM3299 | 100   |
| 3379926 atgacgacat -   | STM3214 | 100 STM0141 | 79.412 STM3214 | 100   |
| 3295723 atgaagatga -   | STM3134 | 100 STM2318 | 62.745 STM3134 | 100   |
| 2974001 atgagcaag -    | STM2827 | 100 STM0602 | 61.165 STM2827 | 100   |
| 2287616 atgaataaga -   | STM2190 | 100 STM2191 | 75 STM2190     | 100   |
| 2327446 gtgagtaaag -   | STM2225 | 100         | STM2225        | 100   |
| 2984885 atgagttttcc -  | STM2839 | 100 STM1691 | 74.257 STM2839 | 100   |
| 2319128 atgggcgcc +    | STM2217 | 100 STM1745 | 62.745 STM2217 | 100   |
| 2339155 atgttagaaa +   | STM2238 | 100 STM3118 | 60.396 STM2238 | 100   |
| 2257978 gtgaaacga -    | STM2162 | 100 STM2810 | 61.765 STM2162 | 99.86 |
| 1010068 atgattgattta - | STM0934 | 100 STM4042 | 54.455 STM0934 | 100   |
| 3591410 atgatccaag -   | STM3430 | 100 STM2970 | 55 STM3430     | 100   |
| 2243839 atgaaactct -   | STM2149 | 100         | STM2149        | 100   |
| 2275386 atgtctgaaat -  | STM2178 | 100         | STM2178        | 100   |
| 3587358 atggctaaac -   | STM3420 | 100 STM1960 | 64.356 STM3420 | 100   |
| 3759992 atgctacatt +   | STM3589 | 100 STM2333 | 64.078 STM3589 | 100   |
| 3509938 atggacgtta -   | STM3340 | 100 STM0151 | 76.471 STM3340 | 100   |
| 4785380 atggctgtcc +   | STM4527 | 100 STM1890 | 87 STM4527     | 100   |
| 4651562 atgagtttatg +  | STM4410 | 100 PSLT046 | 73.267 STM4410 | 100   |
| 4812706 atgacatccc +   | STM4557 | 100 STM0192 | 60.714 STM4557 | 100   |
| 4582367 atgcgcttgct -  | STM4339 | 100 STM1478 | 94 STM4339     | 100   |
| 4703419 atgagcaaa -    | STM4458 | 100 STM1009 | 61 STM4458     | 100   |
| 3423459 atgttcattatt + | STM3253 | 100 STM1378 | 64.423 STM3253 | 100   |
| 732608 atgagcgac -     | STM0667 | 100 STM2119 | 60 STM0667     | 100   |
| 3486762 atgataata +    | STM3322 | 100 STM2745 | 59.804 STM3322 | 100   |
| 3399973 atggattggta +  | STM3234 | 100 STM0768 | 57.843 STM3234 | 100   |
| 216853 atgcaagaa -     | STM0186 | 100 STM0111 | 92.079 STM0186 | 100   |
| 1487959 atgatgatga +   | STM1403 | 100 STM1170 | 58 STM1403     | 100   |
| 3205321 atggaacag -    | STM3044 | 100 STM3949 | 63 STM3044     | 100   |

|         |               |         |        |         |        |         |       |
|---------|---------------|---------|--------|---------|--------|---------|-------|
| 834037  | atgaatgaaa+   | STM0769 | 100    | STM3350 | 72     | STM0769 | 100   |
| 1484524 | atgtcttcagg+  | STM1398 | 100    | STM1637 | 60     | STM1398 | 100   |
| 1178214 | atggaaaagtc-  | STM1090 | 100    | STM1879 | 51     | STM1090 | 100   |
| 793671  | ttggttagccg+  | STM0726 | 100    | STM3124 | 64.078 | STM0726 | 100   |
| 854002  | atgacgcaat+   | STM0788 | 100    | STM1216 | 74     | STM0788 | 100   |
| 899180  | atgccggggt-   | STM0832 | 100    | STM2913 | 61.765 | STM0832 | 100   |
| 3208673 | atgggtcaaaa-  | STM3049 | 100    | STM1904 | 62.136 | STM3049 | 100   |
| 3102796 | atgttttgacg-  | STM2955 | 100    | STM4174 | 57.143 | STM2955 | 100   |
| 462303  | atgagctttttt+ | STM0406 | 100    | STM3225 | 61.165 | STM0406 | 100   |
| 528349  | atgtctgataa-  | STM0473 | 100    | STM2281 | 62.617 | STM0473 | 100   |
| 3320743 | gtgggtaatai-  | STM3159 | 100    | STM0745 | 71     | STM3159 | 100   |
| 3135763 | atgaaaaagi-   | STM2983 | 100    | STM0080 | 70.874 | STM2983 | 100   |
| 2079437 | atgacgacg-    | STM1996 | 100    | STM3649 | 75     | STM1996 | 100   |
| 4527497 | atgaaaaaa-    | STM4285 | 100    | STM2974 | 65.714 | STM4285 | 100   |
| 4472300 | atgaccatttc+  | STM4251 | 100    | STM0579 | 57     | STM4251 | 100   |
| 4577354 | ttgattatggg+  | STM4331 | 100    | STM0995 | 58.491 | STM4331 | 100   |
| 1206371 | atggcaaac+    | STM1121 | 100    | STM1513 | 83     | STM1121 | 100   |
| 3915916 | atgagtgage-   | STM3720 | 100    | STM1094 | 61.538 | STM3720 | 100   |
| 2408075 | atgaaagcc+    | STM2299 | 100    | STM1184 | 64     | STM2299 | 100   |
| 2352337 | atgtggaaa-    | STM2252 | 100    | STM3817 | 100    | STM2252 | 99.6  |
| 2874002 | atgcgaaata-   | STM2732 | 100    | STM3591 | 60.194 | STM2732 | 100   |
| 1705907 | atgattaatga+  | STM1616 | 100    | STM2344 | 65.686 | STM1616 | 100   |
| 1603929 | atgaatgcfg+   | STM1526 | 100    | STM3644 | 68.932 | STM1526 | 100   |
| 1746565 | atgaacaga+    | STM1652 | 100    | STM0614 | 69.608 | STM1652 | 100   |
| 1970284 | atgaaaaca+    | STM1876 | 100    | PSLT064 | 64     | STM1876 | 100   |
| 167704  | atgaaagac-    | STM0143 | 100    | STM3099 | 69     | STM0143 | 100   |
| 3993560 | atgaacgata-   | STM3792 | 100    | STM2975 | 67     | STM3792 | 100   |
| 4087729 | atgctggccg-   | STM3878 | 100    | STM1651 | 61.111 | STM3878 | 98.14 |
| 471506  | atgaacattat+  | STM0417 | 100    | STM1207 | 69     | STM0417 | 95.73 |
| 3251043 | atgaaaaag-    | STM3087 | 100    |         |        | STM3087 | 100   |
| 4476119 | atgggtgcgg+   | STM4255 | 100    | STM3145 | 59.406 | STM4255 | 100   |
| 1737153 | atgaaaatga-   | STM1645 | 100    | STM1155 | 61.111 | STM1645 | 100   |
| 1781081 | atgaataact-   | STM1687 | 100    |         |        | STM1687 | 100   |
| 3959221 | gtgatattct-   | STM3760 | 100    | STM1061 | 49.02  | STM3760 | 100   |
| 1937062 | gtgaaaaaal-   | STM1840 | 100    | STM4383 | 59     | STM1840 | 100   |
| 2763714 | atgaaacca-    | STM2618 | 100    | STM1548 | 73.267 | STM2618 | 100   |
| 812380  | atgtgtatttc+  | STM0742 | 100    | STM1326 | 58.416 | STM0742 | 100   |
| P57756  | atgatgcgta+   | PSLT069 | 100    | STM2249 | 59.406 | PSLT069 | 100   |
| P41307  | atgagccacc-   | PSLT049 | 100    | PSLT050 | 100    | PSLT050 | 100   |
| P78478  | atgtctctcaa+  | PSLT099 | 100    | STM3632 | 49.505 | PSLT099 | 100   |
| P02789  | gtgcaggca+    | PSLT006 | 100    | STM2379 | 62.5   | PSLT006 | 100   |
| P59818  | atgagactcg+   | PSLT071 | 100    |         |        | PSLT071 | 100   |
| P89881  | atggcctgct-   | PSLT108 | 100    | PSLT109 | 100    | PSLT108 | 100   |
| R38570  | +             | STM1653 | 66     | STM2513 | 62.037 | STM1653 | 49.82 |
| R39403  | +             | STM3506 | 59.091 | STM4029 | 54     | STM3506 | 14    |
| R23211  | -             | STM0933 | 64.151 | STM2958 | 63.81  | STM0933 | 41.94 |
| R30828  | +             | STM3229 | 59.223 | STM4399 | 44     | STM3229 | 12.21 |
| R10392  | +             |         |        |         |        |         |       |
|         |               | STM1826 | 100    | STM2971 | 79.208 | STM1826 | 100   |
| 977773  | atgaatgagti+  | STM0907 | 100    | STM0291 | 61.165 | STM0907 | 100   |
| 983411  | atgaattttctg+ | STM0911 | 100    | STM1032 | 81     | STM0911 | 100   |
| 2926627 | ttgtttgaaa-   | STM2779 | 100    | STM1270 | 55     | STM2779 | 100   |

|         |        |         |        |         |       |
|---------|--------|---------|--------|---------|-------|
| STM2961 | 100    | STM2960 | 78     | STM2961 | 100   |
| STM3076 | 100    | STM2474 | 85     | STM3076 | 100   |
| STM0964 | 100    | STM1499 | 81     | STM0964 | 100   |
| STM0364 | 61.682 | STM2338 | 47.525 | STM0364 | 29.58 |
| STM4362 | 54.455 |         |        | STM4362 | 17.57 |
| STM4211 | 70     | STM3459 | 63     | STM4211 | 9.01  |
| STM3999 | 52.427 | STM3159 | 50.485 | STM3999 | 40.89 |
| STM0073 | 55     |         |        | STM0073 | 12.82 |
| STM0196 | 78     | STM3024 | 66.019 | STM0196 | 26.87 |

|         |        |         |        |         |       |
|---------|--------|---------|--------|---------|-------|
| STM4209 | 75     |         |        | STM4209 | 64.78 |
| STM2996 | 61.386 | STM0141 | 60.194 | STM0313 | 27.82 |
| STM0384 | 60.577 | STM0834 | 48.544 | STM0384 | 23.25 |
| STM0198 | 73     | STM0199 | 59     | STM0198 | 54.05 |
| STM0083 | 47     | STM2257 | 40     | STM0083 | 25.25 |

|         |        |         |        |         |       |
|---------|--------|---------|--------|---------|-------|
| STM2977 | 64.706 | STM3478 | 56.311 | STM2977 | 10.18 |
|---------|--------|---------|--------|---------|-------|

|         |        |         |        |         |       |
|---------|--------|---------|--------|---------|-------|
| STM4508 | 64.423 | STM2775 | 56.731 | STM4508 | 11.91 |
| STM4422 | 59.406 | STM3845 | 59     | STM3845 | 20.9  |
| STM2739 | 73     | STM3287 | 62.5   | STM2739 | 53.49 |
| PSLT108 | 62.376 |         |        | PSLT108 | 13.59 |

|         |        |         |        |         |       |
|---------|--------|---------|--------|---------|-------|
| STM2898 | 64.762 |         |        | STM2898 | 8.14  |
| STM0385 | 59.615 | STM4023 | 58.252 | STM4023 | 52.49 |
| STM2088 | 86     | STM4422 | 61.386 | STM2088 | 64.4  |
| STM3356 | 60.377 | STM1614 | 60.194 | STM1614 | 13.46 |
| PSLT066 | 83     | STM4256 | 80     | STM4256 | 47.25 |

|         |        |         |        |         |      |
|---------|--------|---------|--------|---------|------|
| STM2128 | 63.366 | STM2523 | 63     | STM2128 | 8.13 |
| STM1557 | 64.078 | STM0785 | 60.396 | STM0785 | 6.42 |

|                       |         |     |         |         |         |     |
|-----------------------|---------|-----|---------|---------|---------|-----|
| 85397 atgaatcattt:-   | STM0072 | 100 |         | STM0072 | 99.75   |     |
| 3481948 atgtcgcattt:+ | STM3315 | 100 | STM2838 | 75.49   | STM3315 | 100 |
| 3522864 atgactaaaa-   | STM3354 | 100 | STM0498 | 70.874  | STM3354 | 100 |
| 3560025 atgccggttaç+  | STM3388 | 100 | STM1703 | 76      | STM3388 | 100 |
| 722511 atgaatatctg+   | STM0658 | 100 | STM0656 | 78      | STM0658 | 100 |
| 756279 atggagcttcç-   | STM0692 | 100 | STM3028 | 63.208  | STM0692 | 100 |
| 259042 atgaagcaat+    | STM0220 | 100 |         | STM0220 | 100     |     |
| 1583462 atgaagattgl+  | STM1505 | 100 | STM3833 | 64.762  | STM1505 | 100 |
| 1611296 atggcagaaç-   | STM1536 | 100 | STM1789 | 65.686  | STM1536 | 100 |
| 4699304 atgcaaaaçç-   | STM4455 | 100 | STM3886 | 66.667  | STM4455 | 100 |
| 2111455 atgcattatatç- | STM2033 | 100 | STM2463 | 62.617  | STM2033 | 100 |
| 8618 atgacggacç+      | STM0007 | 100 | STM2473 | 84      | STM0007 | 100 |
| 1821707 atggctgatat+  | STM1724 | 100 | STM0848 | 76      | STM1724 | 100 |

|                         |         |     |         |        |         |       |
|-------------------------|---------|-----|---------|--------|---------|-------|
| 2103707 atgaaacttg:-    | STM2023 | 100 | STM2851 | 63.107 | STM2023 | 100   |
| 1824272 atgacaaca+ +    | STM1726 | 100 |         |        | STM1726 | 100   |
| 75435 atgcggttaat+ +    | STM0065 | 100 | STM0142 | 52.941 | STM0065 | 100   |
| 112908 atgccttttac:-    | STM0096 | 100 | STM2479 | 73     | STM0096 | 100   |
| 3503091 gtgtcgcagg+ +   | STM3333 | 100 | STM4564 | 60.577 | STM3333 | 100   |
| 1139495 atgacttttaa:-   | STM1050 | 100 | STM0927 | 95     | STM1050 | 100   |
| 1184383 atgacaattat-    | STM1096 | 100 | STM4292 | 67     | STM1096 | 100   |
| 1218954 atgtcactatt:-   | STM1129 | 100 | STM3337 | 79     | STM1129 | 100   |
| 1253091 atgtttggctat+ + | STM1167 | 100 | STM3944 | 68     | STM1167 | 100   |
| 1294199 atgattattati+ + | STM1210 | 100 | STM0236 | 62.857 | STM1210 | 100   |
| 1352824 atgaaactcg+ +   | STM1273 | 100 | STM3909 | 90     | STM1273 | 100   |
| 1243536 atgacgaagt-     | STM1155 | 100 | STM2401 | 70     | STM1155 | 100   |
| 1286074 atgttttagtc+ +  | STM1202 | 100 | STM4564 | 64.762 | STM1202 | 100   |
| 3690239 atggaaacc:-     | STM3526 | 100 | STM4089 | 66.346 | STM3526 | 100   |
| 3722204 atgaaacca:-     | STM3551 | 100 | STM2249 | 75     | STM3551 | 100   |
| 4802734 atgaatacag-     | STM4542 | 100 | STM0546 | 65.385 | STM4542 | 100   |
| 4841973 atgcaccagc-     | STM4584 | 100 | PSLT108 | 74.51  | STM4584 | 100   |
| 1354784 atgcgaatcc-     | STM1277 | 100 | STM1226 | 61.165 | STM1277 | 100   |
| 4805539 ttgctgtctggc-   | STM4546 | 100 | STM4011 | 56.311 | STM4546 | 96.51 |
| 4843535 atggatcagg-     | STM4586 | 100 | STM1519 | 70     | STM4586 | 100   |
| 316007 atggcaaac+ +     | STM0274 | 100 | STM4301 | 57     | STM0274 | 100   |
| 2893611 atgctggaggt+ +  | STM2754 | 100 | STM1855 | 55.446 | STM2754 | 100   |
| 2922580 atgagactga+ +   | STM2775 | 100 | STM0586 | 68.317 | STM2775 | 100   |
| 4829596 atgccagca:-     | STM4573 | 100 | STM2112 | 59     | STM4573 | 100   |
| 318168 atgaacaga+ +     | STM0277 | 100 | STM0757 | 88     | STM0277 | 100   |
| 342721 gtggttattca+ +   | STM0299 | 100 | STM0972 | 58.654 | STM0299 | 100   |
| 2925769 atgggtatga:-    | STM2777 | 100 | STM0585 | 83     | STM2777 | 100   |
| 4217415 atgatggcga-     | STM4008 | 100 | STM2272 | 70     | STM4008 | 100   |
| 1193964 atgaaaaatg+ +   | STM1106 | 100 | STM2289 | 72.277 | STM1106 | 100   |
| 2522040 atgcaaaac-      | STM2405 | 100 | STM0994 | 62.136 | STM2405 | 100   |
| 2560231 gtgacacatc-     | STM2449 | 100 | STM0951 | 60     | STM2449 | 100   |
| 2605639 ttgtgtatgca+ +  | STM2490 | 100 | STM3791 | 89     | STM2490 | 100   |
| 1050756 atgtccacct+ +   | STM0968 | 100 | STM1901 | 58.824 | STM0968 | 100   |
| 1080209 atgtcattgac+ +  | STM0993 | 100 | STM1378 | 60.396 | STM0993 | 100   |
| 4224853 atgaataagc-     | STM4015 | 100 | STM0429 | 60.784 | STM4015 | 88.16 |
| 2684316 atgctgcaaa-     | STM2545 | 100 | STM4600 | 67.327 | STM2545 | 100   |
| 2734729 atgattaaatt:-   | STM2587 | 100 | STM1868 | 96     | STM2587 | 100   |
| 4289399 atgactgttatt+ + | STM4079 | 100 | STM4571 | 50     | STM4079 | 100   |
| 4335042 atgcaatcca-     | STM4118 | 100 | STM1909 | 61     | STM4118 | 100   |
| 4556384 atgccatgta+ +   | STM4308 | 100 | STM0285 | 63.462 | STM4308 | 100   |
| 3084028 atggacaatt-     | STM2943 | 100 | STM2459 | 62.5   | STM2943 | 100   |
| 2620798 atgaaactaa-     | STM2503 | 100 | STM2410 | 70     | STM2503 | 100   |
| 2699867 atgagttctgt+ +  | STM2558 | 100 | STM4294 | 68.932 | STM2558 | 100   |
|                         | STM2590 | 100 | STM2591 | 100    | STM2590 | 100   |
| 4279743 ttgcagggtga+ +  | STM4068 | 100 | STM2449 | 63.303 | STM4068 | 100   |
| 4328715 atgactaaaa+ +   | STM4113 | 100 | STM3858 | 71.429 | STM4113 | 100   |
| 3002476 atgctgtttgt+ +  | STM2857 | 100 | STM0956 | 63.393 | STM2857 | 100   |
| 4736564 atgatccgcg+ +   | STM4490 | 100 | STM3952 | 58     | STM4490 | 100   |
| 4770464 atggttcatgc-    | STM4515 | 100 | STM1041 | 58.654 | STM4515 | 100   |
| 2130998 atggaaaga+ +    | STM2055 | 100 | STM2470 | 74     | STM2055 | 100   |
| 1351768 atgctggca:-     | STM1271 | 100 | STM0796 | 62.5   | STM1271 | 100   |
| 1560928 gtgcaacaat+ +   | STM1483 | 100 | STM1482 | 58     | STM1483 | 100   |

|         |               |         |     |         |        |
|---------|---------------|---------|-----|---------|--------|
| 1322740 | gtgatagaat:-  | STM1234 | 100 | STM1234 | 100    |
| 1297186 | atgacaacgc-   | STM1213 | 100 | STM2451 | 59.223 |
| 3635028 | atgaacccta+   | STM3478 | 100 | STM2513 | 71.698 |
| 2034567 | atgatgatgc:-  | STM1940 | 100 | STM1197 | 63.107 |
| 4659374 | atgtctaaac:+  | STM4417 | 100 | PSLT081 | 72     |
| 4679211 | atgaaagaa:+   | STM4434 | 100 | STM2207 | 65.094 |
| 4728994 | atggaagtaa-   | STM4484 | 100 | STM0067 | 62.264 |
| 4662753 | atgtctcaga:+  | STM4419 | 100 | STM4418 | 69     |
| 4681124 | atgaaaattg:+  | STM4436 | 100 | STM4436 |        |
| 4730788 | atgacgataa-   | STM4486 | 100 | STM1229 | 63.462 |
| 2454925 | atgaacgtaa-   | STM2341 | 100 | STM2154 | 65.049 |
| 2022067 | atgggaacaa:-  | STM1925 | 100 | STM2941 | 62.5   |
| 1421194 | atgcaaaaact+  | STM1341 | 100 | STM4232 | 50     |
| 2159124 | atgaaaatca-   | STM2080 | 100 | STM4057 | 90     |
| 4042371 | atgtcactgac-  | STM3836 | 100 | STM2334 | 63.725 |
| 2714543 | atgccgccc:-   | STM2568 | 100 | STM0530 | 57.798 |
| 242760  | atgaaaatcg-   | STM0207 | 100 | STM1387 | 92.308 |
| 149960  | atgcgtttatct+ | STM0127 | 100 | STM0639 | 62.617 |
| 126670  | gtgttaaaaa:-  | STM0108 | 100 | STM2641 | 63.725 |
| 2496594 | gtggataaaa-   | STM2385 | 100 | STM1775 | 63     |
| 1402202 | atgggttttatc- | STM1321 | 100 | STM0545 | 62.5   |
| 2065326 | atgatgaaga+   | STM1978 | 100 | STM3459 | 86.275 |
| 2241845 | atgcagcctg-   | STM2147 | 100 | STM2147 |        |
| 1545403 | atggtaacgg+   | STM1469 | 100 | STM4326 | 65     |
| 2170898 | atgaccttttg-  | STM2089 | 100 | STM0030 | 62.5   |
| 2175669 | gtgatgattgt:- | STM2094 | 100 | STM1236 | 55.446 |
| 4059905 | atgtccaaa+    | STM3852 | 100 | STM3242 | 52.885 |
| 257001  | atggctacca+   | STM0218 | 100 | STM2829 | 62.5   |
| 476492  | atgagttttgal- | STM0422 | 100 | STM0422 |        |
| 161394  | atgctaataca:+ | STM0136 | 100 | STM1776 | 63.551 |
| 2430352 | atggaattcgc:- | STM2320 | 100 | STM0591 | 64     |
| 1142581 | gtgtaccatttt- | STM1054 | 100 | STM0554 | 57     |
| 1108337 | atggcccgcac+  | STM1016 | 100 | STM2624 | 100    |
| 563163  | atgacagaa:+   | STM0502 | 100 | STM0878 | 82     |
| 553461  | atggccatga-   | STM0493 | 100 | STM3764 | 68     |
| 4583244 | atgacgacta-   | STM4341 | 100 | STM2515 | 57.547 |
| 2757517 | atgattccgg-   | STM2608 | 100 | STM2608 |        |
| 1111376 | atggctaaatt+  | STM1021 | 100 | STM2619 | 100    |
| 3350042 | atgcaaatga+   | STM3186 | 100 | STM0870 | 61.905 |
| 3386084 | atgaaagca:+   | STM3218 | 100 | STM0793 | 78     |
| 3431358 | atgaaatcag+   | STM3261 | 100 | STM1542 | 63.81  |
| 2403672 | gtgctggcatt-  | STM2296 | 100 | STM3789 | 63.462 |
| 2541016 | atggaacca:-   | STM2427 | 100 | STM3406 | 64.078 |
| 581016  | atgaaactgg+   | STM0519 | 100 | STM3248 | 67     |
| 32119   | atgtattatca:+ | STM0028 | 100 | STM1139 | 67     |
| 2747779 | atgatgggae-   | STM2597 | 100 | STM0916 | 90     |
| 2760192 | atgaatgaca-   | STM1027 | 100 | STM2613 | 100    |
| 2794010 | atgttgcaaaa+  | STM2652 | 100 | STM4410 | 62.857 |
| 3371391 | ttgatgagcg:-  | STM3205 | 100 | STM3799 | 66.346 |
| 3755648 | gtgagccagc-   | STM3586 | 100 | STM0817 | 77     |
| 3448125 | atgatgagttc-  | STM3280 | 100 | STM1655 | 68.627 |
| 473002  | atggcatgtg:+  | STM0419 | 100 | STM1694 | 76.238 |

|         |                |         |     |         |        |         |       |
|---------|----------------|---------|-----|---------|--------|---------|-------|
| 2552562 | gtgaatacatt-   | STM2440 | 100 | STM2430 | 76     | STM2440 | 100   |
| 915711  | atggcggaac-    | STM0845 | 100 | STM4162 | 66     | STM0845 | 100   |
| 304133  | atgagcactg+    | STM0264 | 100 | STM0490 | 66.038 | STM0264 | 100   |
| 1501489 | atgagcagag:+   | STM1422 | 100 | STM2887 | 60     | STM1422 | 100   |
| 2463625 | gtgattgagai-   | STM2352 | 100 | STM0888 | 86     | STM2352 | 100   |
| 14734   | atggcgaaa:+    | STM0013 | 100 | STM1112 | 68.317 | STM0013 | 100   |
| 1831988 | atgacccttg:-   | STM1737 | 100 | STM2364 | 59.434 | STM1737 | 100   |
| 2565654 | atgatcaatg:-   | STM2455 | 100 | STM2045 | 72     | STM2455 | 100   |
| 4289026 | atggctgatt:+   | STM4078 | 100 | STM0618 | 65.766 | STM4078 | 100   |
| 77028   | ttgattaagtc:+  | STM0066 | 100 | STM3469 | 59     | STM0066 | 100   |
| 2571250 | atgggaatta:-   | STM2460 | 100 | STM4294 | 64.078 | STM2460 | 100   |
| 4342795 | atggcactttg+   | STM4123 | 100 | STM4203 | 77.451 | STM4123 | 100   |
| 822955  | atggcgact-     | STM0758 | 100 | STM3137 | 64.151 | STM0758 | 100   |
| 814552  | atggccaga:+    | STM0746 | 100 | STM3158 | 66     | STM0746 | 100   |
| 2954626 | ttggcaacaa+    | STM2807 | 100 | STM2806 | 46     | STM2807 | 100   |
| 1597528 | ttgagtattgc-   | STM1519 | 100 | STM4586 | 70     | STM1519 | 100   |
| 3024081 | ttgcaagcac-    | STM2879 | 100 | STM1344 | 56.436 | STM2879 | 100   |
| 1774528 | atgactgtcac+   | STM1680 | 100 | STM1760 | 60     | STM1680 | 100   |
| 3549702 | gtgcgtctgac+   | STM3378 | 100 | STM1560 | 61.386 | STM3378 | 100   |
| 281237  | atggcgctta:+   | STM0239 | 100 | STM1784 | 92     | STM0239 | 100   |
| 1319363 | atgatgcgcg-    | STM1231 | 100 | STM2785 | 65.347 | STM1231 | 100   |
| 4385890 | atggatctcgc+   | STM4168 | 100 | STM3725 | 64.151 | STM4168 | 100   |
| 2487283 | atgagttggg:+   | STM2375 | 100 | STM3514 | 62.136 | STM2375 | 100   |
| 4621236 | atgtctggc:+    | STM4377 | 100 | STM1356 | 59.223 | STM4377 | 99.81 |
| 1480400 | atgtctgagg:+   | STM1393 | 100 |         |        | STM1393 | 100   |
| 1278265 | atgtatacga:+   | STM1193 | 100 | STM3239 | 52.381 | STM1193 | 100   |
| 1799664 | atgaactccc+    | STM1704 | 100 |         |        | STM1704 | 100   |
| 1999037 | atggtaagcg+    | STM1904 | 100 | STM0267 | 63.725 | STM1904 | 100   |
|         |                | STM4261 | 100 | STM2284 | 60.952 | STM4261 | 99.7  |
| 1101293 | atgtgcgccc-    | STM1008 | 100 | STM2633 | 100    | STM1008 | 100   |
| 1230378 | atgttaatga:-   | STM1142 | 100 | STM3606 | 63     | STM1142 | 100   |
| 782989  | gtgcagccc:+    | STM0717 | 100 | PSLT041 | 60     | STM0717 | 100   |
| 4387685 | gtgaacagttt+   | STM4171 | 100 | STM2251 | 65.385 | STM4171 | 100   |
| 4185076 | atggacgccc:+   | STM3978 | 100 | STM2317 | 89     | STM3978 | 100   |
| 4159554 | atggacaag:-    | STM3953 | 100 | STM0030 | 60.194 | STM3953 | 100   |
| 4125165 | atgagcgata+    | STM3915 | 100 | STM2649 | 64.151 | STM3915 | 100   |
| 1862156 | atgagtaaati-   | STM1764 | 100 | STM1577 | 91     | STM1764 | 100   |
| 1920903 | atgtctatcgt:+  | STM1822 | 100 |         |        | STM1822 | 100   |
| 1832508 | gtgctgtatgt+   | STM1738 | 100 |         |        | STM1738 | 100   |
| 3170031 | atgctgtttgg:-  | STM3010 | 100 | STM4038 | 67     | STM3010 | 100   |
| 3041600 | atgattcctgg-   | STM2897 | 100 |         |        | STM2897 | 100   |
| 2849529 | atgagcgaac:-   | STM2699 | 100 | PSLT101 | 66.99  | STM2699 | 100   |
| 2123805 | atggcgaata+    | STM2046 | 100 | STM1559 | 65     | STM2046 | 100   |
| 1660596 | atgacacgac+    | STM1576 | 100 | STM1765 | 81     | STM1576 | 100   |
| 4150102 | atggatgttttt:+ | STM3941 | 100 | STM0560 | 59.406 | STM3941 | 100   |
| 4137121 | atgactgtact+   | STM3927 | 100 | STM1479 | 83.168 | STM3927 | 100   |
| 4108833 | atgacagccc+    | STM3900 | 100 | STM3235 | 56.566 | STM3900 | 100   |
| 2740794 | atgggaaagi:-   | STM0925 | 100 | STM2589 | 100    | STM2589 | 99.91 |
| 1909044 | atgttgcgattt+  | STM1807 | 100 | STM3537 | 62.376 | STM1807 | 100   |
| 1813043 | atgcataaag+    | STM1715 | 100 | STM3264 | 59.615 | STM1715 | 100   |
| 3074381 | atgaacacc:-    | STM2934 | 100 | STM0659 | 57.843 | STM2934 | 100   |
| 1974728 | atggctaact:-   | STM1880 | 100 | STM2314 | 62.376 | STM1880 | 100   |



|                       |         |     |          |        |         |       |
|-----------------------|---------|-----|----------|--------|---------|-------|
| 680795 atgaacaca:-    | STM0617 | 100 | STM4103  | 60.396 | STM0617 | 100   |
| 1622650 atgaatacta:-  | STM1545 | 100 | STM3917  | 68     | STM1545 | 100   |
| 660676 atgaccggct+    | STM0598 | 100 | STM1073  | 60.194 | STM0598 | 100   |
| 1702916 atgacctttct+  | STM1612 | 100 | STM3838  | 62.857 | STM1612 | 100   |
| 1633137 atggcgaca:-   | STM1555 | 100 | STM3011  | 66.019 | STM1555 | 100   |
| 1676030 atgaaaattai+  | STM1587 | 100 | STM3504  | 61.905 | STM1587 | 97.92 |
| 1705338 atgagttggct+  | STM1615 | 100 | STM0725  | 59.434 | STM1615 | 100   |
| 1725306 atgtcatcag:-  | STM1634 | 100 | STM3658  | 58.824 | STM1634 | 100   |
| 1988193 gtgaaatgtg:-  | STM1892 | 100 | STM0783  | 76.699 | STM1892 | 100   |
| 962516 atgcttattc-    | STM0892 | 100 |          |        | STM0892 | 100   |
| 583879 atggtcggcg+    | STM0522 | 100 | STM0521  | 94     | STM0522 | 100   |
| 585319 atgtctttgatt+  | STM0523 | 100 | STM4445  | 63     | STM0523 | 100   |
| 1042180 atgatgaaa+    | STM0961 | 100 | STM3626  | 57.426 | STM0961 | 100   |
| 1731270 atgaatacaa-   | STM1640 | 100 | STM1295  | 63.81  | STM1640 | 100   |
| 1841621 gtgcagcact+   | STM1747 | 100 | STM1586  | 60.194 | STM1747 | 100   |
| 1891937 atgtgggatg:-  | STM1792 | 100 | STM0740  | 87     | STM1792 | 100   |
| 1928060 atggaattatt:- | STM1828 | 100 | STM2119  | 89     | STM1828 | 100   |
| 3235699 atggttacgtt:- | STM3074 | 100 | STM2441  | 68     | STM3074 | 100   |
| 3859961 atggccgtgg+   | STM3672 | 100 | STM3171  | 64     | STM3672 | 100   |
| 1629597 atgttcaccgt-  | STM1553 | 100 | STM2136  | 47.525 | STM1553 | 100   |
| 4001885 gtggtaaaaa-   | STM3799 | 100 | STM3798  | 74     | STM3799 | 100   |
| 3138791 atgtttgtgta+  | STM2986 | 100 | STM3955  | 68     | STM2986 | 100   |
| 3227495 atgaagttca:-  | STM3065 | 100 | STM0747  | 59.406 | STM3065 | 100   |
| 3279568 atgcccagata-  | STM3120 | 100 | STM3060  | 60.396 | STM3120 | 100   |
| 3317563 atggagcctg-   | STM3154 | 100 | STM0464  | 63     | STM3154 | 100   |
| 2986510 atgtctattctg+ | STM2840 | 100 | STM1533  | 65     | STM2840 | 100   |
| 3250903 atgtctgacg:-  | STM3086 | 100 | STM4213  | 62.376 | STM3086 | 100   |
| 4407200 ctgaaattata-  | STM4186 | 100 | STM4185  | 55     | STM4186 | 100   |
| 3839618 ggtactgcca-   | STM3654 | 100 | STM0555  | 59     | STM3654 | 100   |
| 3242287 atgctatatg-   | STM3080 | 100 | STM4468  | 65     | STM3080 | 100   |
|                       | STM3114 | 100 | STM0701  | 86     | STM3114 | 100   |
| 512365 atgaaacgc:-    | STM0455 | 100 | STM0209  | 67     | STM0455 | 100   |
| 3760467 atgataagca-   | STM3590 | 100 | STM4037  | 60.577 | STM3590 | 100   |
| 3267811 atggcaaag:-   | STM3108 | 100 | STM2381  | 60     | STM3108 | 100   |
|                       | STM0555 | 100 | STM2509  | 96     | STM0555 | 100   |
| 4683179 atggcatttgc+  | STM4438 | 100 | STM0087  | 61.765 | STM4438 | 95.15 |
| 4816496 atgactatga+   | STM4561 | 100 | STM0055  | 62.376 | STM4561 | 100   |
| 2960624 atgacgaaa+    | STM2812 | 100 | STM2690  | 62.376 | STM2812 | 100   |
| 2221728 atgcttttttc+  | STM2128 | 100 | STM2127  | 73     | STM2128 | 100   |
| 2316112 atgctaacac+   | STM2215 | 100 | STM0343  | 67     | STM2215 | 100   |
| 2181431 atgcccgcg:-   | STM2099 | 100 | STM0516  | 61.905 | STM2099 | 100   |
| 2225259 atgactgaatt+  | STM2131 | 100 | STM3502  | 74     | STM2131 | 100   |
| 2303516 atgaaataca+   | STM2203 | 100 |          |        | STM2203 | 100   |
| 2208199 atgactgatc:-  | STM2122 | 100 | STM2933  | 48.039 | STM2122 | 100   |
| 1943888 atggaaaatc-   | STM1846 | 100 | STM3869  | 59.615 | STM1846 | 100   |
| 3890064 atgcttaacat+  | STM3695 | 100 | STM3176  | 61.905 | STM3695 | 100   |
| 3833468 atgaaaaaa+    | STM3645 | 100 | STM1445  | 62.376 | STM3645 | 100   |
| 2290429 atggagcgtg-   | STM2192 | 100 | STM0775  | 62.376 | STM2192 | 98.45 |
| 1873331 atggattttca:- | STM1775 | 100 | STM2642  | 65.347 | STM1775 | 100   |
| 3858069 atgaaaaata+   | STM3670 | 100 | STM2690  | 65     | STM3670 | 100   |
| 1966381 atgggttgttg:- | STM0907 | 100 | STM1869A | 99     | STM0907 | 100   |
| 4618363 atggcaaaa:+   | STM4375 | 100 | STM2228  | 69     | STM4375 | 100   |

|         |                 |         |     |         |        |         |       |
|---------|-----------------|---------|-----|---------|--------|---------|-------|
| 3347290 | ttggaagcc -     | STM3183 | 100 | STM1095 | 63.462 | STM3183 | 100   |
| 3440056 | gtgttagataa -   | STM3273 | 100 | STM3925 | 65     | STM3273 | 100   |
| 3320002 | atggcaatgc -    | STM3158 | 100 | STM0746 | 66.355 | STM3158 | 100   |
| 3229284 | atggaagattl -   | STM3067 | 100 | STM4102 | 78     | STM3067 | 100   |
| 3488812 | atgacctcttæ +   | STM3325 | 100 | STM3615 | 60.748 | STM3325 | 100   |
| 3959055 | atgtcctgcta -   | STM3759 | 100 | STM4414 | 60.952 | STM3759 | 100   |
| 3325300 | atgaacaattl +   | STM3164 | 100 | STM2461 | 54     | STM3164 | 100   |
| 1755126 | atgttaaaattl +  | STM1660 | 100 | STM3700 | 63.551 | STM1660 | 100   |
| 3964268 | atgactgaca -    | STM3763 | 100 | STM4456 | 78     | STM3763 | 100   |
| 3318456 | atgaaagaaæ +    | STM3156 | 100 |         |        | STM3156 | 100   |
| 3239418 | atgaaaattcæ +   | STM3077 | 100 | STM0979 | 82     | STM3077 | 100   |
| 1173855 | atgtcgaacg +    | STM1083 | 100 | STM0019 | 68.932 | STM1083 | 100   |
| 850176  | atgaaacaæ +     | STM0785 | 100 | STM2180 | 50.962 | STM0785 | 100   |
| 3259081 | atgagcggcæ +    | STM3097 | 100 | STM3306 | 56     | STM3097 | 100   |
| 1155180 | atgtgtgaacæ +   | STM1063 | 100 | STM0544 | 66.981 | STM1063 | 100   |
| 817256  | atgaagcagæ +    | STM0748 | 100 |         |        | STM0748 | 99.77 |
| 862364  | atgagttggcæ +   | STM0795 | 100 | STM2461 | 69     | STM0795 | 100   |
| 911269  | atgaccgttaæ +   | STM0842 | 100 | STM0840 | 88     | STM0842 | 100   |
| 1690724 | atggtaaaatl -   | STM1599 | 100 |         |        | STM1599 | 100   |
| 494585  | atgagtcattc -   | STM0440 | 100 |         |        | STM0440 | 100   |
| 3195781 | atgcacacaæ -    | STM3034 | 100 | PSLT105 | 74     | STM3034 | 100   |
| 3262520 | atgagtgtctg +   | STM3102 | 100 | STM3241 | 88     | STM3102 | 100   |
| 543210  | atgtttggaaæ +   | STM0485 | 100 | STM2272 | 65.421 | STM0485 | 100   |
| 645465  | atggaattcaæ +   | STM0587 | 100 |         |        | STM0587 | 100   |
| 2612659 | atgaagatcg -    | STM2498 | 100 | STM3003 | 60.748 | STM2498 | 100   |
| 1123161 | gtggctaaga +    | STM1034 | 100 | STM0913 | 74     | STM1034 | 100   |
| 2242569 | atgaaaagta +    | STM2148 | 100 | STM2255 | 56.436 | STM2148 | 100   |
| 401596  | atgcagttccæ +   | STM0355 | 100 | STM0353 | 58.491 | STM0355 | 100   |
| 466908  | atggctatcat +   | STM0411 | 100 |         |        | STM0411 | 100   |
| 3896798 | atggccaata -    | STM3702 | 100 | STM0369 | 61     | STM3702 | 100   |
| 4622016 | atgattatcag -   | STM4379 | 100 | STM1008 | 58     | STM4379 | 100   |
| 3001358 | atgtgcatagæ +   | STM2856 | 100 | STM3143 | 71.845 | STM2856 | 100   |
| 1205202 | atgccaactc -    | STM1118 | 100 | STM1712 | 62.162 | STM1118 | 100   |
| 1334389 | atgatgaaac -    | STM1249 | 100 | STM0762 | 60.784 | STM1249 | 100   |
| 1393966 | atgtttgatcttæ + | STM1314 | 100 | STM4261 | 63.725 | STM1314 | 100   |
| 3972330 | ttgactaccac -   | STM3772 | 100 | STM2689 | 62.5   | STM3772 | 100   |
| 3975347 | atgagacgta -    | STM3773 | 100 | STM0571 | 72.277 | STM3773 | 100   |
| 66893   | atgaacgaaæ -    | STM0056 | 100 | STM0766 | 83     | STM0056 | 100   |
| 19966   | atggctacaa +    | STM0018 | 100 |         |        | STM0018 | 100   |
| 68392   | atgaccaacæ -    | STM0057 | 100 | STM3512 | 60.396 | STM0057 | 100   |
| 23054   | atgaccatttc +   | STM0019 | 100 | STM1169 | 61.538 | STM0019 | 100   |
| 32994   | atgagacaat -    | STM0029 | 100 | STM0031 | 65.686 | STM0029 | 100   |
| 108170  | atgaaaaaaæ -    | STM0093 | 100 |         |        | STM0093 | 100   |
| 1232924 | atgtccgtaat +   | STM1146 | 100 | STM0231 | 55.882 | STM1146 | 100   |
| 1703194 | atgatgaaæ +     | STM1613 | 100 | STM0612 | 59.615 | STM1613 | 100   |
| 1756533 | atgatcatgat -   | STM1662 | 100 | STM0706 | 62.745 | STM1662 | 100   |
| 1693635 | atgcttacaæ +    | STM1603 | 100 | STM2996 | 66.667 | STM1603 | 100   |
| 1627087 | atggcatttca -   | STM1551 | 100 | STM2643 | 51     | STM1551 | 100   |
| 3401902 | atgagcaaaæ +    | STM3237 | 100 | STM3852 | 62.5   | STM3237 | 100   |
| P66646  | atgggaaata +    | PSLT082 | 100 | STM0282 | 69.811 | PSLT082 | 100   |
| P58490  | atgatccactc +   | PSLT070 | 100 | STM4525 | 71.429 | PSLT070 | 100   |
|         |                 | PSLT108 | 100 | PSLT109 | 100    | PSLT108 | 100   |

|         |               |         |        |         |        |         |       |
|---------|---------------|---------|--------|---------|--------|---------|-------|
| P22248  | atgagtcagc +  | PSLT031 | 100    | PSLT021 | 68     | PSLT031 | 100   |
| P67381  | atgaaccggc +  | PSLT084 | 100    | STM2516 | 57.282 | PSLT084 | 100   |
| P25659  | atgttaagag -  | PSLT035 | 100    | STM0670 | 54.455 | PSLT035 | 100   |
| R45735  | +             | STM2182 | 54.902 | STM3189 | 48     | STM2182 | 15.74 |
| R46145  | +             | STM0489 | 61.386 | STM3905 | 59.615 | STM3905 | 23.86 |
| R29886  | +             | STM1997 | 71.569 | STM2022 | 64.423 | STM1997 | 55.31 |
| R42021  | -             | STM2326 | 52     | STM2199 | 44     | STM2326 | 14.32 |
| R25333  | -             | STM2927 | 61.386 | STM2031 | 50.495 | STM2927 | 27.27 |
| P17625  | ttgtttgtagc - | PSLT023 | 100    | STM0267 | 80.198 | PSLT023 | 100   |
| 2859456 | atgaatcgttt - | STM2714 | 100    | STM2252 | 51     | STM2714 | 100   |
|         |               | STM2777 | 100    | STM0585 | 71     | STM2777 | 100   |
|         |               | STM0915 | 100    | STM2598 | 69     | STM0915 | 100   |
|         |               | STM0918 | 100    | STM2594 | 77     | STM0918 | 100   |
| 994908  | atggcaacgc +  | STM0923 | 100    | STM2590 | 80     | STM0923 | 100   |
| 3274908 | atgaaatcaa -  | STM3114 | 100    | STM0701 | 79     | STM3114 | 100   |
|         |               | STM2238 | 61.538 | STM1855 | 59.406 | STM4503 | 25.58 |
|         |               | STM0705 | 100    | STM0353 | 77     | STM0705 | 69.32 |
|         |               | STM4235 | 63.551 | STM0007 | 62.617 | STM4235 | 31.05 |
|         |               | STM1095 | 62.376 | STM2384 | 62     | STM2405 | 34.46 |
|         |               | STM2237 | 90     | STM0906 | 70     | STM2237 | 55.24 |
|         |               | STM2754 | 58.252 | STM1671 | 54.808 | STM2754 | 29.87 |
|         |               | STM1009 | 60.952 | STM2632 | 60.952 | STM1009 | 23.81 |
|         |               | STM0547 | 65.385 | STM0122 | 59.615 | STM0122 | 17.32 |
|         |               | STM3474 | 61.905 | STM2458 | 60     | STM2458 | 14.95 |
|         |               | STM1709 | 62.376 | STM3727 | 62     | STM3727 | 8.75  |
|         |               | STM4207 | 78     | STM4207 |        | STM4207 | 45.29 |
|         |               | STM3506 | 53.465 | STM0968 | 39.604 | STM3506 | 7.4   |
|         |               | STM0158 | 62     | STM0200 | 59     | STM0200 | 45.3  |
|         |               | STM0216 | 26     | STM0216 |        | STM0216 | 10.84 |
|         |               | STM3478 | 47.525 | STM1712 | 43.564 | STM3478 | 26.96 |
|         |               | STM1056 | 98     | STM1241 | 74     | STM1056 | 66.68 |
|         |               | PSLT097 | 61.765 | STM1046 | 59.804 | STM1046 | 22.86 |
|         |               | STM0056 | 99     | STM3353 | 94     | STM0056 | 87.29 |
|         |               | STM2729 | 100    | STM2729 |        | STM2729 | 83.08 |
|         |               | STM2714 | 94     | STM2713 | 93     | STM2714 | 82.1  |
|         |               | PSLT104 | 62.037 | STM0747 | 59.434 | STM0747 | 4.91  |
|         |               | STM4524 | 97     | STM3523 | 60.194 | STM4524 | 19.84 |
|         |               | STM2725 | 92     | STM3336 | 77.228 | STM2725 | 56.17 |
|         |               | STM2994 | 64.151 | STM2994 |        | STM2994 | 6.97  |
| 1608015 | atgcatgaatt - | STM1531 | 100    | STM3144 | 66     | STM1531 | 100   |

|         |               |         |     |         |        |         |       |
|---------|---------------|---------|-----|---------|--------|---------|-------|
| 4024537 | atgcgaaaa-    | STM3823 | 100 | STM2255 | 76     | STM3823 | 100   |
| 487691  | atgaaaatta-   | STM0434 | 100 | STM4413 | 59     | STM0434 | 100   |
| 2101202 | atgacgcag-    | STM2019 | 100 | STM0162 | 59.804 | STM2019 | 100   |
| 47356   | gtgaaacatc+   | STM0039 | 100 |         |        | STM0039 | 100   |
| 89454   | atgaagataa+   | STM0075 | 100 | STM1354 | 74     | STM0075 | 100   |
| 4261933 | atgagtaacg-   | STM4050 | 100 | STM3099 | 61     | STM4050 | 100   |
| 3336690 | atgctatatatt- | STM3173 | 100 | STM1714 | 71.287 | STM3173 | 100   |
| 3490265 | atgaaaaaa-    | STM3327 | 100 |         |        | STM3327 | 100   |
| 3533116 | atgagtctgttt- | STM3366 | 100 | STM0149 | 87     | STM3366 | 100   |
| 3565386 | atggcaaaact+  | STM3391 | 100 | STM0475 | 92     | STM3391 | 100   |
| 717039  | atgaacaag+    | STM0653 | 100 | STM0593 | 50.485 | STM0653 | 99.37 |
| 182431  | atgagtactg+   | STM0154 | 100 | STM0564 | 62     | STM0154 | 100   |
| 209733  | atgctgggat+   | STM0178 | 100 |         |        | STM0178 | 100   |
| 247229  | atggctggct+   | STM0210 | 100 |         |        | STM0210 | 100   |
| 282393  | atggtgagaa+   | STM0241 | 100 |         |        | STM0241 | 100   |
| 1603570 | gtggccagg+    | STM1525 | 100 | STM0832 | 59.804 | STM1525 | 94.21 |
| 3823012 | atgaaaaac-    | STM3636 | 100 | STM3640 | 56     | STM3636 | 100   |
| 3713162 | atgaaaaag-    | STM3543 | 100 | STM4481 | 66     | STM3543 | 100   |
| 4798537 | atgtcaccaa+   | STM4539 | 100 | STM2101 | 61.765 | STM4539 | 100   |
| 4849494 | atgaatatga-   | STM4592 | 100 | STM2388 | 49     | STM4592 | 100   |
| 2881637 | gtggtaaatta+  | STM2742 | 100 | STM2099 | 63.107 | STM2742 | 100   |
| 369997  | atgttggtct-   | STM0324 | 100 | STM0325 | 100    | STM0325 | 100   |
| 1141455 | atggacacta+   | STM1052 | 100 | STM0260 | 63.551 | STM1052 | 100   |
| 2857072 | atggcagtc-    | STM2708 | 100 | STM4046 | 53.333 | STM2708 | 100   |
| 2875089 | atgactaaac+   | STM2734 | 100 | STM2735 | 71     | STM2734 | 100   |
| 356839  | atgtgcgaac+   | STM0311 | 100 | STM0004 | 61.321 | STM0311 | 100   |
| 2932226 | atgaataatc-   | STM2783 | 100 | STM1626 | 68.571 | STM2783 | 100   |
| 1189510 | atgaagggt+    | STM1101 | 100 | STM2177 | 67.327 | STM1101 | 100   |
| 1226004 | atggagataa+   | STM1135 | 100 | STM3646 | 66.99  | STM1135 | 100   |
|         |               | STM1046 | 100 | STM1047 | 100    | STM1046 | 100   |
| 1180418 | atgccagca+    | STM1092 | 100 |         |        | STM1092 | 100   |
| 1215169 | gtgtgtgccc+   | STM1126 | 100 | STM0669 | 64     | STM1126 | 100   |
| 1246004 | atgcaatttaa-  | STM1158 | 100 | STM3980 | 60.577 | STM1158 | 100   |
| 1291139 | atgatcaaag+   | STM1206 | 100 |         |        | STM1206 | 100   |
| 3693603 | atggttactac-  | STM3529 | 100 | STM4108 | 76     | STM3529 | 100   |
| 3574084 | atggaaacct-   | STM3401 | 100 | STM0528 | 64.486 | STM3401 | 99.64 |
| 1250226 | atgaaaaagi-   | STM1164 | 100 | STM4448 | 89     | STM1164 | 100   |
| 3666454 | atgaaaaaa+    | STM3506 | 100 | STM0045 | 65.714 | STM3506 | 100   |
| 3695274 | atgatgagca+   | STM3530 | 100 | STM3832 | 75     | STM3530 | 100   |
| 3747589 | atgactccgtt+  | STM3579 | 100 |         |        | STM3579 | 100   |
| 4283245 | atgagcgata-   | STM4073 | 100 | STM3925 | 62.963 | STM4073 | 100   |
| 1125603 | atgttttaaac+  | STM1039 | 100 | STM2596 | 69.608 | STM1039 | 100   |
| 4425993 | atgaacacta-   | STM4204 | 100 | STM0557 | 66     | STM4204 | 100   |
| 4468006 | atggcagga+    | STM4246 | 100 | STM1288 | 62     | STM4246 | 100   |
| 4524326 | atgaaaaatt+   | STM4283 | 100 | STM3614 | 68.932 | STM4283 | 100   |
| 3070745 | atgcgaattg-   | STM2929 | 100 | STM3095 | 76.238 | STM2929 | 100   |
| 945042  | ttgaaacata+   | STM0871 | 100 | STM2382 | 56.863 | STM0871 | 100   |
| 2491996 | ttgcgccatc+   | STM2379 | 100 | PSLT006 | 61.765 | STM2379 | 100   |
| 979581  | atggacggc+    | STM0909 | 100 | STM1030 | 64     | STM0909 | 100   |
| 999026  | ttgatgacaa+   | STM0925 | 100 | STM2589 | 100    | STM0925 | 100   |
| 2672697 | atgaaacatt-   | STM2532 | 100 | STM0002 | 66     | STM2532 | 100   |
| 4404976 | atgaaaacc+    | STM4184 | 100 | STM0368 | 84     | STM4184 | 100   |

|                       |         |     |         |         |         |      |
|-----------------------|---------|-----|---------|---------|---------|------|
| 4428331 atgaaaggc-    | STM4207 | 100 | STM4526 | 61.905  | STM4207 | 100  |
| 4518218 atgacagcgc+   | STM4278 | 100 | STM2368 | 62.5    | STM4278 | 100  |
| 4561757 atgctaaaag-   | STM4315 | 100 | STM2867 | 68      | STM4315 | 100  |
| 4592559 gtgcgcctga-   | STM4347 | 100 | STM0478 | 72      | STM4347 | 100  |
| 2515481 atgttctctca+  | STM2401 | 100 | STM1155 | 70      | STM2401 | 100  |
| 2558527 atgtctcaggt-  | STM2446 | 100 | STM0621 | 59.813  | STM2446 | 100  |
| 2604026 atggcttactc-  | STM2488 | 100 | STM3316 | 56      | STM2488 | 100  |
| 1374766 atgcgaaccc-   | STM1295 | 100 | STM1640 | 64.423  | STM1295 | 100  |
| 29432 atgaaaatac+     | STM0024 | 100 | STM0547 | 64      | STM0024 | 100  |
| 4617715 atgcatatact+  | STM4374 | 100 | STM3951 | 61.765  | STM4374 | 100  |
| 4651909 atgcgaatatt+  | STM4411 | 100 | STM0658 | 61.321  | STM4411 | 100  |
| 2377959 atgaaaattat-  | STM2273 | 100 | STM3833 | 74      | STM2273 | 100  |
| 2429801 atgatccccct-  | STM2319 | 100 | STM1340 | 61.905  | STM2319 | 100  |
| 2419089 atgagaatgt-   | STM2311 | 100 | STM3229 | 66      | STM2311 | 100  |
| 2453100 atgtctgtcgtt+ | STM2339 | 100 | STM3300 | 60.952  | STM2339 | 100  |
| 2133614 atgcgcgcac+   | STM2058 | 100 | STM2532 | 50      | STM2058 | 100  |
| 3409968 atgaatgaat-   | STM3242 | 100 | STM2057 | 83.333  | STM3242 | 100  |
| 234730 atgatgtcatt+   | STM0197 | 100 | STM3027 | 65.686  | STM0197 | 100  |
| 1236146 atgagctctgt-  | STM1149 | 100 |         | STM1149 | 100     |      |
| 235734 atgaaaaaa+     | STM0199 | 100 | STM3904 | 60.396  | STM0199 | 100  |
| 417712 atgacgactg-    | STM0367 | 100 | STM2562 | 73      | STM0367 | 100  |
| 1361705 atgacctggtt-  | STM1284 | 100 | STM0820 | 55      | STM1284 | 100  |
| 1506878 atgcaacctg-   | STM1428 | 100 | STM3290 | 63.366  | STM1428 | 100  |
| 4626630 gtgactcagc+   | STM4383 | 100 | STM0884 | 67.647  | STM4383 | 100  |
| 4663915 atggccaact-   | STM4420 | 100 |         | STM4420 | 100     |      |
| 2467151 atgaaacgat-   | STM2356 | 100 | STM2921 | 68      | STM2356 | 100  |
| 1416661 atgtcacatct+  | STM1337 | 100 | STM1358 | 61.905  | STM1337 | 100  |
| 1456188 atggctggctt+  | STM1372 | 100 | STM1472 | 71.287  | STM1372 | 100  |
| 4815477 atgacgtgtc+   | STM4560 | 100 | STM0400 | 58      | STM4560 | 100  |
| 1571969 atgcacaccc-   | STM1494 | 100 | STM1492 | 67.327  | STM1494 | 100  |
| 3978578 atgaatgaaa-   | STM3776 | 100 | STM0257 | 63.366  | STM3776 | 100  |
| 4451990 atggcgagc+    | STM4230 | 100 | STM3554 | 76      | STM4230 | 100  |
| 4093591 atggacgcat+   | STM3882 | 100 | STM2189 | 74      | STM3882 | 97.1 |
| 288810 tgggcaaagt+    | STM0248 | 100 | STM4454 | 61.111  | STM0248 | 100  |
| 2074348 atggcggac-    | STM1991 | 100 | STM0790 | 61.682  | STM1991 | 100  |
| 4462315 atggaaaag-    | STM4241 | 100 | STM4241 | 58.824  | STM4241 | 100  |
| 1385920 atgacgctat+   | STM1305 | 100 | STM1524 | 81.308  | STM1305 | 100  |
| 1389042 atgcgtaaac+   | STM1308 | 100 | STM2689 | 56.731  | STM1308 | 100  |
| 1437854 atggattttca-  | STM1356 | 100 | STM0073 | 73      | STM1356 | 100  |
| 1519482 atgtctgggc-   | STM1442 | 100 | STM1523 | 64.486  | STM1442 | 100  |
| 1259781 atgtctattgc+  | STM1176 | 100 | STM1178 | 65.347  | STM1176 | 100  |
| 2176548 atgaaaacgc-   | STM2095 | 100 | STM3923 | 59.223  | STM2095 | 100  |
| 364929 atgacgttac+    | STM0319 | 100 | STM2408 | 60.577  | STM0319 | 100  |
| 4767739 atgacgactc-   | STM4513 | 100 | STM2249 | 61.765  | STM4513 | 100  |
| 4854404 atgaagcagt-   | STM4596 | 100 | STM0020 | 65      | STM4596 | 100  |
| 3798527 atgatgactat-  | STM3617 | 100 | STM2981 | 63.366  | STM3617 | 100  |
| 3438693 atggacacac-   | STM3270 | 100 | STM1453 | 60.748  | STM3270 | 100  |
| 2413999 atgcgtagcg-   | STM2306 | 100 | STM4600 | 65.049  | STM2306 | 100  |
| 2394300 atgagcgcac+   | STM2286 | 100 |         | STM2286 | 100     |      |
| 2606109 atgaatccac+   | STM2491 | 100 | STM1426 | 61.165  | STM2491 | 100  |
| 565699 atgcaaaaat-    | STM0505 | 100 | STM1675 | 64.078  | STM0505 | 100  |
| 2746590 ctgaaccggc-   | STM2595 | 100 | STM0917 | 84      | STM2595 | 100  |

|                        |         |             |                |       |
|------------------------|---------|-------------|----------------|-------|
| 2759409 atgtttgtggc -  | STM2611 | 100 STM1029 | 91 STM2611     | 100   |
| 3941024 atgtttgaactr - | STM3746 | 100 STM3908 | 65 STM3746     | 100   |
| 3814265 atgttgcaagtr - | STM3629 | 100 STM1745 | 67.925 STM3629 | 100   |
| 3811343 atgagtacgc -   | STM3626 | 100 STM0848 | 71.287 STM3626 | 100   |
| 3715148 atgaccttac -   | STM3545 | 100 STM1462 | 72 STM3545     | 100   |
| 1129325 atgatgaaa +    | STM1042 | 100 STM0919 | 68 STM1042     | 100   |
| 1107227 atgagtatgtc +  | STM1014 | 100 STM2626 | 100 STM1014    | 100   |
| 4713333 atggcaaacc +   | STM4470 | 100 STM0963 | 61.468 STM4470 | 100   |
| 3088101 atgccagtc +    | STM2945 | 100 STM0972 | 69 STM2945     | 100   |
| 4704905 atggctaacc -   | STM4460 | 100 STM1886 | 63 STM4460     | 100   |
| 4313308 atgagtgtgal +  | STM4101 | 100 STM0002 | 75 STM4101     | 100   |
| 774035 atggccgcgc -    | STM0706 | 100 PSLT092 | 65.347 STM0706 | 100   |
| 780389 atgctgaatat +   | STM0713 | 100 STM2126 | 70 STM0713     | 100   |
| 605281 atgataagga +    | STM0544 | 100 STM1063 | 67.327 STM0544 | 100   |
| 2712141 atgatggaaa -   | STM2565 | 100 STM2219 | 64.423 STM2565 | 100   |
| 4260902 gtggcaaacc +   | STM4049 | 100 STM2129 | 65.094 STM4049 | 100   |
| 707487 atgaaatcgtt -   | STM0645 | 100 STM0646 | 86 STM0645     | 88.07 |
| 308606 atggatccac -    | STM0268 | 100 STM0796 | 60 STM0268     | 100   |
| 2702094 atgaacgttat +  | STM2559 | 100 STM0234 | 83 STM2559     | 100   |
| 3660325 atgcaagag -    | STM3502 | 100 STM2131 | 74 STM3502     | 100   |
| 1788158 atgccgttact +  | STM1695 | 100 STM0848 | 66 STM1695     | 100   |
| 129662 atggcagag -     | STM0110 | 100 STM4569 | 65.347 STM0110 | 100   |
| 1845806 atggctgttac +  | STM1749 | 100 STM2461 | 69 STM1749     | 100   |
| 3036256 atgggctgatg -  | STM2892 | 100 STM0468 | 63.208 STM2892 | 100   |
| 2570027 gtgaacctc -    | STM2459 | 100 STM3789 | 66.355 STM2459 | 100   |
| 4239634 atgagtcagc +   | STM4029 | 100         | STM4029        | 100   |
| 696986 gtgagtgata -    | STM0634 | 100 STM0030 | 67 STM0634     | 100   |
| 4383238 atgctaacc -    | STM4165 | 100         | STM4165        | 100   |
| 4233741 atgaacaact -   | STM4022 | 100         | STM4022        | 100   |
| 4210348 gtgagtttacc +  | STM4002 | 100 STM0343 | 42 STM4002     | 100   |
| 1597065 atgaaaatgc -   | STM1518 | 100         | STM1518        | 100   |
| 1276019 atggccgtac +   | STM1191 | 100 STM2221 | 86.139 STM1191 | 100   |
| 1776090 atgtcacaga +   | STM1682 | 100 STM0371 | 76.238 STM1682 | 100   |
| 2617003 atgggtcagg +   | STM2501 | 100         | STM2501        | 100   |
| 3529496 atgaaaacg +    | STM3362 | 100 STM3361 | 63 STM3362     | 100   |
| 3915613 atgaaaatag -   | STM3719 | 100 STM4155 | 60.194 STM3719 | 100   |
| 349889 atgatgccga +    | STM0305 | 100 STM3494 | 59.615 STM0305 | 100   |
| 4378922 atgttacgtatt - | STM4160 | 100 STM1725 | 68 STM4160     | 100   |
| 3975837 atgaaacga +    | STM3774 | 100 STM1041 | 59.406 STM3774 | 100   |
| 2039370 atgcatcacg +   | STM1948 | 100 STM1850 | 75.728 STM1948 | 100   |
| 4079305 atggaaaacc -   | STM3870 | 100 STM2071 | 61 STM3870     | 100   |
| 2116321 atgaatgattc -  | STM2037 | 100 STM4087 | 79 STM2037     | 100   |
| 4537498 atgtctcgga -   | STM4294 | 100 STM2558 | 70 STM4294     | 100   |
| 2007583 atgatggtttal - | STM1911 | 100         | STM1911        | 100   |
| 1807430 atgtcgtcaac -  | STM1712 | 100 STM0111 | 61.765 STM1712 | 100   |
| 2812545 atgcaaaaac -   | STM2670 | 100 STM0760 | 81.188 STM2670 | 100   |
| 3111879 atgagtactc -   | STM2960 | 100 STM2961 | 86 STM2960     | 100   |
| 482132 atgctgatga -    | STM0428 | 100 STM1226 | 74 STM0428     | 100   |
| 4183412 atgcaatcctc -  | STM3977 | 100 STM1008 | 56.436 STM3977 | 100   |
| 4159125 atgctgagcg +   | STM3952 | 100 STM4490 | 58.824 STM3952 | 100   |
| 4133003 atgaaaggc +    | STM3923 | 100 STM2095 | 59.223 STM3923 | 100   |
| 1979432 atgaaatccta -  | STM1885 | 100 STM3622 | 65.094 STM1885 | 100   |

|                        |         |     |         |        |         |       |
|------------------------|---------|-----|---------|--------|---------|-------|
| 4121787 atgcgtttaaa +  | STM3912 | 100 | STM3951 | 66     | STM3912 | 100   |
| 125711 atggcaacgc -    | STM0107 | 100 | STM3312 | 67.327 | STM0107 | 99.94 |
| 1842651 gtgattcaacc -  | STM1748 | 100 |         |        | STM1748 | 100   |
| 1888486 atgactggaa +   | STM1788 | 100 | STM1537 | 77.228 | STM1788 | 100   |
| 3158811 atgaaacagf -   | STM3001 | 100 |         |        | STM3001 | 100   |
| 1837631 atgagcttatc -  | STM1743 | 100 | STM3627 | 78     | STM1743 | 100   |
| 4252758 atgaaacact -   | STM4042 | 100 | STM0834 | 67.327 | STM4042 | 100   |
| 4160947 atggacgca: -   | STM3955 | 100 | STM2986 | 68     | STM3955 | 100   |
| 4116323 gtgattgccaa: + | STM3907 | 100 |         |        | STM3907 | 100   |
| 2750465 atgtcgcagtc -  | STM2601 | 100 |         |        | STM2601 | 100   |
| 1905842 atggcaatga +   | STM1804 | 100 | STM0571 | 64.706 | STM1804 | 100   |
| 1852410 atgcaatcac +   | STM1756 | 100 | STM2500 | 59.406 | STM1756 | 100   |
| 1688279 atgacgatat: -  | STM1597 | 100 | STM3680 | 77     | STM1597 | 100   |
| 1943182 atgaacacttt -  | STM1845 | 100 | STM0481 | 55.66  | STM1845 | 100   |
| 1986399 gtgcaacag: -   | STM1890 | 100 | STM4527 | 60     | STM1890 | 100   |
| 564869 atgtccgtac: -   | STM0504 | 100 | STM2649 | 73     | STM0504 | 100   |
| 589958 atgataaagc -    | STM0527 | 100 |         |        | STM0527 | 100   |
| 595114 atgaaacgta +    | STM0531 | 100 | STM2318 | 59     | STM0531 | 100   |
| 638146 atggacggtc -    | STM0579 | 100 | STM1703 | 59.804 | STM0579 | 100   |
| 679754 atgtccagac -    | STM0616 | 100 |         |        | STM0616 | 100   |
| 1626394 atgacgcaac -   | STM1549 | 100 | STM3186 | 60.194 | STM1549 | 100   |
| 1884333 atgaaaaata -   | STM1785 | 100 | STM4157 | 63.063 | STM1785 | 100   |
| 1706551 atgatcctgc: +  | STM1617 | 100 | STM3483 | 66.99  | STM1617 | 100   |
| 1709044 atgaaaactc -   | STM1620 | 100 |         |        | STM1620 | 100   |
| 1746953 atgactaaag -   | STM1653 | 100 | STM2723 | 61.111 | STM1653 | 74.83 |
| 1775468 atgagatctgt -  | STM1681 | 100 | STM1185 | 87     | STM1681 | 100   |
| 560446 atgtctcaaac -   | STM0498 | 100 | STM0353 | 81     | STM0498 | 100   |
| 1600092 atgacaatca -   | STM1522 | 100 | STM0257 | 74     | STM1522 | 100   |
| 1642501 atgagttcaa: -  | STM1560 | 100 | STM4453 | 72.549 | STM1560 | 100   |
| 3245838 atggacacc: -   | STM3083 | 100 | STM1508 | 77     | STM3083 | 100   |
| 488308 atgaagggga: +   | STM0435 | 100 | STM3742 | 50.98  | STM0435 | 100   |
| 3750621 atggcaacc: +   | STM3582 | 100 | STM1481 | 78     | STM3582 | 100   |
| 4252099 atgggcaata -   | STM4041 | 100 | STM4042 | 100    | STM4041 | 76.6  |
| 3860959 atgaaattac: +  | STM3673 | 100 | STM3169 | 64     | STM3673 | 100   |
| 3925881 atggcagaa: +   | STM3732 | 100 | STM0112 | 66.355 | STM3732 | 100   |
| 3932841 atgagattatg -  | STM3739 | 100 | STM2838 | 91     | STM3739 | 100   |
| 3131514 atgaaacaa: +   | STM2977 | 100 | STM1576 | 72     | STM2977 | 100   |
| 2845814 gtgaactttaa -  | STM2695 | 100 | STM2318 | 58.252 | STM2695 | 100   |
| 450580 atgcgcatcc -    | STM0396 | 100 | STM1806 | 52.427 | STM0396 | 96.39 |
| 3301677 atgttataaaa: - | STM3138 | 100 | STM1626 | 66     | STM3138 | 100   |
| 3774353 atgatgggtat -  | STM3601 | 100 | STM0572 | 77     | STM3601 | 100   |
| 3891136 gtgaagaga: -   | STM3696 | 100 | STM2539 | 62.136 | STM3696 | 100   |
| 3984421 atgcaggata -   | STM3784 | 100 | STM1209 | 59.406 | STM3784 | 100   |
| 2839053 atgctctact +   | STM2689 | 100 | STM1278 | 64.078 | STM2689 | 100   |
| 61792 atggatagca -     | STM0052 | 100 | STM0053 | 80     | STM0052 | 89.45 |
| 477415 atggactttac -   | STM0423 | 100 |         |        | STM0423 | 100   |
| 3326233 atggctaatac: + | STM3165 | 100 | STM0255 | 71.028 | STM3165 | 100   |
| 2337184 atgagtgaac -   | STM2236 | 100 |         |        | STM2236 | 100   |
| 2253697 atgctgagta: -  | STM2157 | 100 |         |        | STM2157 | 100   |
| 1015658 atgttttcagg: - | STM0938 | 100 |         |        | STM0938 | 100   |
| 3837364 atgtcgaaat: +  | STM3650 | 100 | STM1881 | 56     | STM3650 | 100   |
| 4581817 atgtcctggat +  | STM4338 | 100 | STM1220 | 58     | STM4338 | 100   |

|         |               |         |     |         |        |         |       |
|---------|---------------|---------|-----|---------|--------|---------|-------|
| 4683664 | atgcgtaaaa+   | STM4439 | 100 | STM4212 | 52.941 | STM4439 | 100   |
| 3594944 | atgattcgta-   | STM3438 | 100 | STM1622 | 71     | STM3438 | 100   |
| 4600347 | atgatgaatc+   | STM4357 | 100 | STM0995 | 65.385 | STM4357 | 100   |
| 3453389 | atggcgaaa(-   | STM3285 | 100 | STM1538 | 51.429 | STM3285 | 100   |
| 3363992 | atgaaagta-    | STM3200 | 100 | STM3073 | 63.462 | STM3200 | 100   |
| 3288810 | atgaatacaa-   | STM3128 | 100 | STM0960 | 60     | STM3128 | 100   |
| 2965924 | atgaaggcta-   | STM2816 | 100 | STM1479 | 68.627 | STM2816 | 100   |
| 4840972 | atgatgctgc+   | STM4582 | 100 | STM4123 | 62.376 | STM4582 | 100   |
| 431579  | atgtttaatct+  | STM0376 | 100 | STM1742 | 65.049 | STM0376 | 100   |
| 2312495 | tgaccaa(-     | STM2212 | 100 | STM4530 | 64     | STM2212 | 90.63 |
| 2173345 | atgattgata-   | STM2091 | 100 |         |        | STM2091 | 100   |
| 2246344 | atgctaagga-   | STM2150 | 100 | STM0023 | 67     | STM2150 | 100   |
| 1935327 | tgaaaaag(-    | STM1836 | 100 | STM0122 | 79     | STM1836 | 100   |
|         |               | STM3113 | 100 | STM2421 | 81     | STM3113 | 96.32 |
| 3226483 | atgaaacgtc+   | STM3064 | 100 | STM3897 | 62.857 | STM3064 | 100   |
| 818613  | atgagcagta+   | STM0750 | 100 |         |        | STM0750 | 100   |
| 886950  | atgtctttgatt+ | STM0820 | 100 | STM1655 | 74     | STM0820 | 100   |
| 3204401 | atgaaaaag(-   | STM3043 | 100 | STM1875 | 58.095 | STM3043 | 100   |
| 1262591 | atgatcagttc+  | STM1179 | 100 | STM1178 | 62.617 | STM1179 | 100   |
| 858736  | atgaaacttat-  | STM0792 | 100 | STM1081 | 70     | STM0792 | 100   |
| 933603  | atgtattcatta- | STM0860 | 100 | STM2377 | 61.682 | STM0860 | 100   |
| 3483107 | atgagtaaaa+   | STM3317 | 100 | STM3369 | 61.111 | STM3317 | 100   |
| 3965183 | atggaggaar-   | STM3764 | 100 | STM0493 | 92     | STM3764 | 100   |
| 3262233 | atgaatacgtt+  | STM3101 | 100 | STM2293 | 67.327 | STM3101 | 100   |
| 2038903 | ttgatcaacgt-  | STM1947 | 100 | STM2072 | 79     | STM1947 | 100   |
| 3498983 | atgtgttacga+  | STM3330 | 100 | STM0670 | 69     | STM3330 | 100   |
| 3424384 | gtgatctacac+  | STM3254 | 100 | STM1382 | 62.376 | STM3254 | 95.91 |
| 3378248 | atgccgcata+   | STM3211 | 100 | STM2924 | 68     | STM3211 | 100   |
| 1484994 | atgaaaaaa(-   | STM1399 | 100 | STM2956 | 64.078 | STM1399 | 100   |
| 2333959 | atgatctaca+   | STM2232 | 100 |         |        | STM2232 | 100   |
| 827343  | ttgttaggtaa+  | STM0763 | 100 | STM1401 | 61.905 | STM0763 | 100   |
| 811097  | atgttagatat+  | STM0740 | 100 | STM1792 | 87     | STM0740 | 100   |
| 3016317 | atggcaacac-   | STM2873 | 100 | STM3307 | 77     | STM2873 | 100   |
| 2947626 | atgaatttgat(- | STM2799 | 100 | STM1751 | 68     | STM2799 | 100   |
| 3922205 | atggctaaag-   | STM3727 | 100 | STM1187 | 46.602 | STM3727 | 100   |
| 2816888 | atggtaactat-  | STM2676 | 100 | STM1559 | 52     | STM2676 | 100   |
| 602700  | atggcgacat-   | STM0541 | 100 |         |        | STM0541 | 100   |
| 1800587 | atgagcgattr-  | STM1706 | 100 | STM1103 | 83     | STM1706 | 100   |
| 1792018 | atgtccataac+  | STM1699 | 100 | STM2502 | 58.929 | STM1699 | 100   |
| 2055237 | atgaaaaata+   | STM1966 | 100 | STM3075 | 93     | STM1966 | 100   |
| 1679547 | atgtcgcacc-   | STM1592 | 100 |         |        | STM1592 | 100   |
| 4151326 | atgcaaaa(-    | STM3944 | 100 | STM1167 | 74     | STM3944 | 100   |
| 4119225 | atggcaaaa(-   | STM3910 | 100 | STM0092 | 50.495 | STM3910 | 100   |
| 1067904 | atgaccaagt+   | STM0982 | 100 | STM3755 | 61.386 | STM0982 | 100   |
| 3078540 | ttgatgagat(-  | STM2937 | 100 | STM3201 | 62.264 | STM2937 | 100   |
| 3863118 | atgagccgac+   | STM3675 | 100 | STM4386 | 67     | STM3675 | 100   |
| 1440375 | atgaaaacc(-   | STM1358 | 100 | STM1337 | 62.376 | STM1358 | 100   |
| 1432212 | atgagttcgg(-  | STM1351 | 100 | STM0078 | 77     | STM1351 | 100   |
| 4151836 | atgcaatatc(-  | STM3945 | 100 | STM4514 | 59.804 | STM3945 | 100   |
| 4580625 | atggttaaaa+   | STM4336 | 100 | STM4335 | 56     | STM4336 | 100   |
| 4856322 | atgactaaag+   | STM4599 | 100 | STM4413 | 59     | STM4599 | 100   |
| 255     | atgaaccgc+    | STM0001 | 100 | STM4234 | 60.606 | STM0001 | 100   |



|         |              |         |        |         |        |         |       |
|---------|--------------|---------|--------|---------|--------|---------|-------|
| 4705162 | atgtcgtaca+  | STM4462 | 100    | STM4463 | 49     | STM4462 | 100   |
| 1818455 | atggcagcgc+  | STM1722 | 100    | STM3622 | 68.889 | STM1722 | 100   |
| 1357720 | atgtacgatc+  | STM1281 | 100    | STM0532 | 46     | STM1281 | 100   |
| 3359523 | atgctgatga-  | STM3197 | 100    | STM3807 | 59.406 | STM3197 | 100   |
| 3462184 | atgtacgaag-  | STM3293 | 100    | STM2116 | 70.192 | STM3293 | 100   |
| 945797  | atgcgcacgc+  | STM0873 | 100    | STM3832 | 89     | STM0873 | 100   |
| 1053930 | ttgcgcgtga-  | STM0971 | 100    | STM1163 | 63.208 | STM0971 | 100   |
| 964207  | atgcaaca-    | STM0894 | 100    | STM1006 | 65     | STM0894 | 100   |
| 785168  | atgcaacgta+  | STM0719 | 100    | STM2530 | 61.165 | STM0719 | 100   |
| P22808  | atgcattttca+ | PSLT032 | 100    | STM0468 | 61.765 | PSLT032 | 100   |
| P73547  | gtgtttatgcg+ | PSLT093 | 100    |         |        | PSLT093 | 100   |
| P48755  | atgttcagagt+ | PSLT056 | 100    | STM2759 | 70.588 | PSLT056 | 100   |
| P83179  | gtgggaatga+  | PSLT102 | 100    | STM1668 | 61.468 | PSLT102 | 100   |
| P64639  | atgagaaaa+   | PSLT080 | 100    | STM4028 | 63.366 | PSLT080 | 95.98 |
| P04725  | atggagctgg-  | PSLT008 | 100    | STM4295 | 62     | PSLT008 | 97.56 |
|         |              | STM1828 | 100    | STM0037 | 63.462 | STM1828 | 100   |
| P92540  | atgatgagta+  | PSLT108 | 100    | STM0747 | 61.386 | PSLT108 | 100   |
| 37057   | atgaataaga+  | STM0032 | 100    | STM0038 | 76     | STM0032 | 100   |
|         |              | STM2043 | 100    | STM0326 | 72     | STM2043 | 100   |
|         |              | STM2119 | 100    | STM3853 | 60.194 | STM2119 | 100   |
|         |              | STM2210 | 100    | STM3148 | 63.462 | STM2210 | 100   |
|         |              | STM0966 | 100    | STM1496 | 89     | STM0966 | 100   |
|         |              | STM3181 | 100    | STM3835 | 70     | STM3181 | 100   |
|         |              | STM3240 | 100    | STM1826 | 77.451 | STM3240 | 100   |
|         |              | STM3331 | 100    | STM2479 | 80     | STM3331 | 100   |
|         |              | STM1041 | 100    | STM2594 | 100    | STM1041 | 100   |
|         |              | STM4514 | 59.615 |         |        | STM4514 | 18.11 |
|         |              | STM2197 | 48.544 | STM3757 | 31     | STM2197 | 16.67 |
|         |              | STM2089 | 65.686 | STM2208 | 62.5   | STM2089 | 19.85 |
|         |              | STM2711 | 93     | PSLT104 | 63.551 | STM2711 | 85.2  |
|         |              | STM2937 | 85     | STM0113 | 55.238 | STM2937 | 76.5  |
|         |              | PSLT018 | 59.615 | STM1237 | 57.282 | STM1237 | 21.28 |
|         |              | STM3679 | 48     | STM1922 | 41     | STM3679 | 4.88  |
|         |              | STM2733 | 93     |         |        | STM2733 | 84.8  |
|         |              | STM2717 | 96     | STM1201 | 64.423 | STM2717 | 92.2  |
|         |              | STM2700 | 95     |         |        | STM2700 | 89    |
|         |              | STM1604 | 55.882 |         |        | STM1604 | 7.55  |
|         |              | STM0046 | 51.485 |         |        | STM0046 | 11.23 |
|         |              | STM2731 | 93     | STM3305 | 81     | STM2731 | 87.7  |
|         |              | STM2715 | 89     | STM2460 | 60.784 | STM2715 | 82.7  |
|         |              | STM0946 | 98     | STM1957 | 98     | STM0946 | 91.58 |
|         |              | STM1631 | 59.813 | STM2767 | 59.804 | STM2767 | 14.38 |
|         |              | STM3381 | 60.784 | STM3883 | 56.863 | STM3883 | 35.3  |
|         |              | STM4217 | 63     |         |        | STM4217 | 52.82 |
|         |              | STM2513 | 44     | STM2517 | 38     | STM2513 | 27.68 |
|         |              | STM2786 | 100    | STM0827 | 61.468 | STM2786 | 84.84 |
|         |              | STM3688 | 98     | STM3501 | 57     | STM3688 | 96.7  |
|         |              | STM2731 | 100    | STM2289 | 63.81  | STM2731 | 98.2  |
|         |              | STM4318 | 94     |         |        | STM4318 | 87.57 |
|         |              | STM2003 | 66     | STM3759 | 64.762 | STM2003 | 10.24 |
|         |              | STM2162 | 43.689 | STM3789 | 34     | STM2162 | 6.75  |

|         |        |         |        |         |       |
|---------|--------|---------|--------|---------|-------|
| STM2297 | 61.111 | STM1316 | 60.784 | STM0221 | 10.84 |
| STM0591 | 66.038 | STM2204 | 61.386 | STM0591 | 2.79  |
| STM0354 | 61.468 | STM1703 | 61.111 | STM0354 | 30.22 |
| STM4501 | 90     | STM3330 | 48.515 | STM4501 | 76.77 |

|                       |         |     |         |        |         |       |
|-----------------------|---------|-----|---------|--------|---------|-------|
| 769697 atgaacgacç-    | STM0703 | 100 | STM2130 | 79     | STM0703 | 100   |
| 4037825 atgatgaaa+    | STM3833 | 100 | STM2273 | 74     | STM3833 | 100   |
| 4063449 atggctgcaa-   | STM3856 | 100 | STM2964 | 64.356 | STM3856 | 100   |
| 4099651 atgccttaag-   | STM3888 | 100 | STM0784 | 60.396 | STM3888 | 100   |
| 1876647 atgaccctgc+   | STM1778 | 100 | STM3524 | 63.107 | STM1778 | 100   |
| 131073 atggccaaaç-    | STM0111 | 100 | STM0329 | 74     | STM0111 | 100   |
| 51824 atgagttctgt-    | STM0042 | 100 | STM0722 | 48.077 | STM0042 | 100   |
| 140405 atgttccgggç+   | STM0119 | 100 | STM0351 | 73     | STM0119 | 100   |
| 174753 atgatggaca-    | STM0150 | 100 | STM0568 | 79     | STM0150 | 100   |
| 208335 atgaattcattç-  | STM0176 | 100 | STM4594 | 75     | STM0176 | 100   |
| 237103 atgaaaatae+    | STM0201 | 100 | STM1327 | 62.963 | STM0201 | 100   |
| 280512 atgctgacag-    | STM0238 | 100 |         |        | STM0238 | 100   |
| 3514669 atgcaaagcç-   | STM3346 | 100 | STM2298 | 63.636 | STM3346 | 100   |
| 3552276 atggacgctc+   | STM3381 | 100 | STM2784 | 63.366 | STM3381 | 100   |
| 709110 gtgcgatatct-   | STM0647 | 100 | STM3215 | 88     | STM0647 | 100   |
| 737230 atgacaaatc+    | STM0671 | 100 | STM3056 | 72     | STM0671 | 100   |
| 763382 atgagtaaac-    | STM0700 | 100 | STM2558 | 65.347 | STM0700 | 100   |
| 2051595 atgacctcaa+   | STM1962 | 100 | STM4303 | 65     | STM1962 | 100   |
| 1363762 atgaatatattç- | STM1285 | 100 |         |        | STM1285 | 100   |
| 2198813 atgacaacaç-   | STM2115 | 100 |         |        | STM2115 | 92.43 |
| 2861209 atgaagttgttç- | STM2718 | 100 | STM2305 | 63.725 | STM2718 | 100   |
| 2889742 atgtttctggtc+ | STM2750 | 100 | STM2832 | 61     | STM2750 | 100   |
| 2908423 atgagccttta-  | STM2766 | 100 | STM0437 | 62.264 | STM2766 | 100   |
| 2942880 atgaatacca+   | STM2792 | 100 | STM3468 | 65.347 | STM2792 | 100   |
| 4855103 atgaaaaaal-   | STM4597 | 100 | STM1146 | 58     | STM4597 | 100   |
| 323827 atgtctgtctç+   | STM0284 | 100 | STM2086 | 63.366 | STM0284 | 100   |
| 2901314 atgtcgcgac+   | STM2760 | 100 | STM2006 | 71     | STM2760 | 100   |
| 1146753 atgacacaac+   | STM1057 | 100 | STM3515 | 62.376 | STM1057 | 100   |
| 1572888 atgaccacttt-  | STM1495 | 100 | STM4308 | 63.462 | STM1495 | 100   |
| 3604594 atgtccaggtç-  | STM3452 | 100 |         |        | STM3452 | 100   |
| 1149785 gtggcgacgt-   | STM1060 | 100 | STM4208 | 61.386 | STM1060 | 100   |
| 1531569 atggtattcag-  | STM1456 | 100 | STM3190 | 78.431 | STM1456 | 100   |
| 3587800 atgctgttaaa-  | STM3421 | 100 | STM0386 | 62.136 | STM3421 | 100   |
| 3618413 atgtggcgaa+   | STM3467 | 100 | STM2558 | 63.208 | STM3467 | 100   |
| 3658182 atgctgcttaç+  | STM3500 | 100 | STM3134 | 53.465 | STM3500 | 100   |
| 1348122 atgactggttc+  | STM1265 | 100 |         |        | STM1265 | 100   |
| 1217937 atgattacacç-  | STM1128 | 100 | STM3109 | 52.475 | STM1128 | 100   |
| 1283634 atgaaaaaal+   | STM1199 | 100 | STM2441 | 62.5   | STM1199 | 100   |
| 1304572 atgaataaga+   | STM1218 | 100 | STM0891 | 72     | STM1218 | 100   |
| 3712028 ttgagcacga-   | STM3542 | 100 | STM4485 | 69     | STM3542 | 100   |
| 1116159 atgtttgtggc+  | STM1029 | 100 | STM0908 | 96     | STM1029 | 100   |

|                        |         |     |         |        |         |       |
|------------------------|---------|-----|---------|--------|---------|-------|
| 4423932 atggcgatag -   | STM4202 | 100 | STM0597 | 67     | STM4202 | 100   |
| 4268325 atgactgaag +   | STM4057 | 100 | STM0730 | 63.462 | STM4057 | 100   |
| 4299083 atgactgaac -   | STM4090 | 100 | STM1965 | 54     | STM4090 | 100   |
| 4347736 atgacccccg -   | STM4129 | 100 |         |        | STM4129 | 100   |
| 3049427 atggaattaai +  | STM2907 | 100 | STM1853 | 67.647 | STM2907 | 100   |
| 4581243 atgttgaaaai -  | STM4337 | 100 | STM4154 | 88     | STM4337 | 100   |
| 2503702 atggcatga +    | STM2391 | 100 | STM2815 | 64     | STM2391 | 100   |
| 961771 atgagtattca -   | STM0891 | 100 | STM0828 | 80     | STM0891 | 100   |
| 2582258 atggatgagc -   | STM2472 | 100 | STM2466 | 63.725 | STM2472 | 100   |
| 2609434 atgttcaggca +  | STM2494 | 100 | STM1990 | 72     | STM2494 | 100   |
| 2690319 atgtcagtaat -  | STM2551 | 100 | STM3055 | 63.725 | STM2551 | 100   |
| 4276938 atgaaactttc +  | STM4065 | 100 | STM0149 | 67     | STM4065 | 100   |
| 4308674 atgttatttaca - | STM4098 | 100 | STM3981 | 79     | STM4098 | 100   |
| 3046643 atggaagaa -    | STM2903 | 100 | STM4258 | 63.208 | STM2903 | 100   |
| 3068484 atggtaagtga -  | STM2926 | 100 |         |        | STM2926 | 100   |
| 3100382 atgacaacga -   | STM2953 | 100 |         |        | STM2953 | 100   |
| 964881 atgaacgtgc -    | STM0895 | 100 |         |        | STM0895 | 100   |
|                        | STM0911 | 100 | STM0912 | 100    | STM0912 | 100   |
| 1003326 ttgaccagac -   | STM0928 | 100 | STM0557 | 63.208 | STM0928 | 100   |
| 1390946 atgactctgca -  | STM1310 | 100 | STM0007 | 55.882 | STM1310 | 100   |
| 1514681 atgaataagc -   | STM1437 | 100 | STM0386 | 61.538 | STM1437 | 100   |
| 2068639 atgaaaacga +   | STM1984 | 100 | STM0086 | 61.682 | STM1984 | 96.2  |
| 4666710 ttggcgtatgt +  | STM4423 | 100 | STM1355 | 60     | STM4423 | 100   |
| 2393113 atgaaatttga +  | STM2285 | 100 | STM3645 | 68     | STM2285 | 100   |
| 4753390 atgtttccagt -  | STM4499 | 100 | STM1899 | 56     | STM4499 | 100   |
| 4742193 atgcggaai -    | STM4493 | 100 |         |        | STM4493 | 100   |
| 4774277 atgaaaaai +    | STM4518 | 100 | STM3766 | 77     | STM4518 | 100   |
| 1226825 atgtatcccg +   | STM1136 | 100 | STM3744 | 62.136 | STM1136 | 100   |
| 1375491 atggatgcac +   | STM1296 | 100 | STM1674 | 72.816 | STM1296 | 100   |
| 1522228 atgaaatcgg +   | STM1446 | 100 | STM4512 | 62.376 | STM1446 | 100   |
| 1546329 atgtcccgca -   | STM1470 | 100 | STM1614 | 59.048 | STM1470 | 100   |
| 1552482 atgggactcg +   | STM1476 | 100 |         |        | STM1476 | 100   |
| 1242461 atgtcacctc -   | STM1154 | 100 | STM0382 | 76     | STM1154 | 100   |
| 3009799 atgttcttaac +  | STM2864 | 100 | STM2863 | 66     | STM2864 | 100   |
| 1529192 atgaacaaa -    | STM1453 | 100 | STM4202 | 62.136 | STM1453 | 100   |
| 2073889 atgctgttccg +  | STM1990 | 100 | STM2494 | 71.569 | STM1990 | 100   |
| 2154061 atgagtcaga +   | STM2074 | 100 | STM0190 | 76.471 | STM2074 | 100   |
| 1378606 atgctgtgttt +  | STM1298 | 100 | STM1714 | 70     | STM1298 | 100   |
| 1520320 atgaaattgg +   | STM1444 | 100 | STM1598 | 64.762 | STM1444 | 100   |
| 1511624 atgagcacc +    | STM1433 | 100 | STM2511 | 59.223 | STM1433 | 100   |
| 1540709 atgaaaaai -    | STM1466 | 100 | STM2981 | 75.238 | STM1466 | 100   |
| 1496992 atgaagaatg +   | STM1415 | 100 | STM2894 | 71     | STM1415 | 100   |
| 4084609 atggcagac -    | STM3875 | 100 | STM0124 | 59.804 | STM3875 | 93.67 |
| 3983588 atgaatgatal -  | STM3782 | 100 | STM1614 | 70     | STM3782 | 100   |
| 2723173 atggctgaatt -  | STM2578 | 100 | STM1073 | 63.462 | STM2578 | 100   |
| 452849 gtgctggaac +    | STM0398 | 100 | STM0703 | 77     | STM0398 | 100   |
| 4403640 atgaatccac +   | STM4183 | 100 | STM2074 | 62.136 | STM4183 | 99.81 |
| 81616 atgagctatta -    | STM0069 | 100 | STM3399 | 59.804 | STM0069 | 100   |
| 1403008 atgtcaacc -    | STM1322 | 100 | STM2820 | 59.804 | STM1322 | 99.55 |
| 1409385 atgaacaag +    | STM1330 | 100 | STM2403 | 62.5   | STM1330 | 100   |
| 2067145 atgatccagg +   | STM1981 | 100 | STM3294 | 65     | STM1981 | 100   |
| 1537421 ttgatggtcag +  | STM1462 | 100 | STM3545 | 72     | STM1462 | 100   |

|                        |         |             |                |       |
|------------------------|---------|-------------|----------------|-------|
| 1567142 atgctgaagc +   | STM1489 | 100 STM1490 | 63 STM1489     | 100   |
| 2484596 atgcatccca +   | STM2371 | 100 PSLT101 | 65.385 STM2371 | 100   |
| 2719392 atgaaaattgr-   | STM2573 | 100 STM3279 | 61.765 STM2573 | 100   |
| 2763577 atgaacactc -   | STM2617 | 100 STM2410 | 58.095 STM2617 | 100   |
| 3343837 atgcttaccgt +  | STM3180 | 100 STM2370 | 61.111 STM3180 | 100   |
| 3738743 atgattcgctt -  | STM3570 | 100 STM0428 | 73.529 STM3570 | 100   |
| 3638002 atggataagtl-   | STM3482 | 100 STM1114 | 59.406 STM3482 | 100   |
| 390912 atgaaaaga +     | STM0346 | 100 STM0833 | 56.731 STM0346 | 100   |
| 1466032 atgtttaaaga -  | STM1382 | 100 STM3547 | 69.307 STM1382 | 100   |
| 523924 atgaaactcg +    | STM0465 | 100         | STM0465        | 100   |
| 617722 atgttgaagtt-    | STM0559 | 100 STM4206 | 70 STM0559     | 100   |
| 4655271 atgagcttact -  | STM4414 | 100 STM2898 | 61.386 STM4414 | 100   |
| 4789715 atggatacga -   | STM4532 | 100 STM0600 | 89 STM4532     | 100   |
| 3352987 atggatgatgt-   | STM3189 | 100 STM1723 | 70.297 STM3189 | 100   |
| 3388273 atgagctacc +   | STM3219 | 100 STM3331 | 61.765 STM3219 | 100   |
| 3390073 atgacctcac +   | STM3221 | 100         | STM3221        | 100   |
| 3645753 atggcgcattc -  | STM3491 | 100 STM1221 | 70 STM3491     | 100   |
| 2451362 gtgtcccgtat +  | STM2338 | 100 STM2466 | 68 STM2338     | 100   |
| 2692351 atgatgccga +   | STM2553 | 100         | STM2553        | 100   |
| 593024 atgatccacg +    | STM0529 | 100         | STM0529        | 100   |
| 591029 atgaaaatca -    | STM0528 | 100 STM3081 | 81 STM0528     | 100   |
| 3052846 atgaatgagtr +  | STM2909 | 100 STM1124 | 63.366 STM2909 | 100   |
| 4271095 atgcgcaaaç +   | STM4060 | 100         | STM4060        | 100   |
| 728009 atgtacgaatt -   | STM0663 | 100 STM0829 | 74 STM0663     | 100   |
| 3577445 atgtcagttttg + | STM3406 | 100 STM2427 | 64.078 STM3406 | 100   |
| 2726755 atggcgaacc -   | STM2582 | 100 STM0931 | 60.185 STM2582 | 100   |
| 2156751 atgttaacag +   | STM2078 | 100 STM0837 | 50 STM2078     | 100   |
| 4219207 gtgatcgaaa +   | STM4009 | 100 STM3445 | 65.686 STM4009 | 100   |
| 951681 atgagcacac +    | STM0879 | 100 STM1225 | 67 STM0879     | 100   |
| 3581702 atgagttttatt + | STM3410 | 100 STM3411 | 93 STM3410     | 100   |
| 2915414 atggctactat +  | STM2772 | 100 STM2702 | 78 STM2772     | 100   |
| 1268097 atgcgtatcaç +  | STM1184 | 100 STM2299 | 64.423 STM1184 | 100   |
| 2724830 atgagcactg -   | STM2580 | 100 STM3843 | 64.423 STM2580 | 100   |
| 3791556 atgaaaacct -   | STM3614 | 100 STM4283 | 68.932 STM3614 | 100   |
| 2694934 atgttaaagcç -  | STM2555 | 100 STM1815 | 58.654 STM2555 | 100   |
| 1211558 atgggaaccç -   | STM1124 | 100 STM2791 | 81 STM1124     | 79.35 |
| 1541987 atgcaaaaa -    | STM1467 | 100         | STM1467        | 100   |
| 940596 atgagtatcaç -   | STM0867 | 100 STM0840 | 78 STM0867     | 100   |
| 903853 atgagctctggr +  | STM0836 | 100 STM0570 | 62.745 STM0836 | 100   |
| 1956065 atgaagtttga +  | STM1858 | 100 STM0637 | 59 STM1858     | 100   |
| 2270653 atgaacgattt +  | STM2173 | 100 STM4114 | 58.491 STM2173 | 100   |
| 791718 atgaaaaag +     | STM0725 | 100 STM0589 | 63 STM0725     | 100   |
| 4551524 atgaaacact -   | STM4304 | 100 STM2512 | 63.107 STM4304 | 100   |
| 2032351 atgaaaatgg -   | STM1938 | 100 STM0136 | 62.376 STM1938 | 100   |
| 1773610 atgaggcattt -  | STM1679 | 100 STM1746 | 77 STM1679     | 100   |
| 1781463 atgggtggaa -   | STM1688 | 100 STM0482 | 60.194 STM1688 | 100   |
| 4501259 atggataaaa +   | STM4262 | 100 STM0956 | 63.366 STM4262 | 100   |
| 57793 atgtctaaatc +    | STM0048 | 100 STM0070 | 59.804 STM0048 | 100   |
| 1113574 atgaaaaacç -   | STM1025 | 100 STM1149 | 57.407 STM1025 | 100   |
| 1741738 atgtccagcg -   | STM1649 | 100 STM0591 | 53.922 STM1649 | 100   |
| 4230701 atgaattctctç - | STM4019 | 100 STM0041 | 61.765 STM4019 | 100   |
| 3735599 atgaagggta -   | STM3567 | 100 STM3564 | 88 STM3567     | 100   |

|                        |         |     |         |        |         |       |
|------------------------|---------|-----|---------|--------|---------|-------|
| 2870115 atgcaggact -   | STM2728 | 100 | STM2727 | 62     | STM2728 | 100   |
|                        | STM0291 | 100 | STM0292 | 100    | STM0291 | 99.93 |
| 2549795 atgatcgagc +   | STM2436 | 100 | STM1598 | 62.745 | STM2436 | 100   |
| 1998589 atgatctacat +  | STM1903 | 100 | STM0790 | 60.577 | STM1903 | 100   |
| 4482457 atgaatagaa +   | STM4260 | 100 |         |        | STM4260 | 100   |
| 3180836 atgaaagag -    | STM3019 | 100 | STM3982 | 69.903 | STM3019 | 97.52 |
| 3374270 atgccggtaa +   | STM3209 | 100 | STM4291 | 58.824 | STM3209 | 100   |
| 3022017 atgcattatntt + | STM2877 | 100 | STM0449 | 57.843 | STM2877 | 100   |
| 4175625 atgtccaagtc +  | STM3968 | 100 | STM4570 | 59.223 | STM3968 | 100   |
| 4045024 gtgtcactttc -  | STM3838 | 100 | STM1612 | 62.857 | STM3838 | 99.93 |
| 3225436 atgacgcagc -   | STM3063 | 100 | STM3587 | 62.963 | STM3063 | 100   |
| 4139213 atgaccaata +   | STM3929 | 100 | STM1836 | 64.151 | STM3929 | 100   |
| 3261648 atgaacgata +   | STM3100 | 100 | STM2360 | 61.765 | STM3100 | 99.71 |
| 4365590 atgtctatcac +  | STM4152 | 100 | STM1400 | 51.456 | STM4152 | 100   |
| 604672 atgaaacata +    | STM0543 | 100 | STM0021 | 77     | STM0543 | 100   |
| 2012672 atggcggata -   | STM1916 | 100 | STM2271 | 65.686 | STM1916 | 100   |
| 4212544 atgtctgaac +   | STM4004 | 100 | STM4500 | 61.538 | STM4004 | 100   |
| 3175010 atggctgccg +   | STM3014 | 100 | STM0115 | 60.396 | STM3014 | 100   |
| 4220859 atgagcgccc -   | STM4011 | 100 | STM4546 | 54.717 | STM4011 | 100   |
| 4153086 atgatgcaatt +  | STM3947 | 100 | STM0175 | 67.961 | STM3947 | 100   |
| 4108383 atgtcactggc -  | STM3899 | 100 | STM2936 | 88     | STM3899 | 100   |
| 2049145 atggcacaca -   | STM1959 | 100 | STM2771 | 100    | STM1959 | 100   |
| 3088923 atgtccaac -    | STM2946 | 100 | STM2445 | 64.762 | STM2946 | 100   |
| 1648804 atgaaagctg +   | STM1567 | 100 | STM1627 | 66.99  | STM1567 | 100   |
| 1701045 atgaccaaat +   | STM1610 | 100 |         |        | STM1610 | 100   |
| 1739789 atgaagggtg -   | STM1646 | 100 | STM1258 | 66.346 | STM1646 | 100   |
| 1765253 atgatgatga +   | STM1671 | 100 | STM1287 | 62.385 | STM1671 | 100   |
| 1618345 atgaaagtca -   | STM1542 | 100 | STM1365 | 64.151 | STM1542 | 100   |
| 1588672 atgaccgtcg -   | STM1510 | 100 | STM3357 | 60     | STM1510 | 100   |
| 1092879 atgagcgttgt -  | STM1000 | 100 | STM3593 | 68.317 | STM1000 | 100   |
| 651579 atgaccgaat -    | STM0590 | 100 | STM0192 | 78.431 | STM0590 | 100   |
| 384341 atgaaaatgg -    | STM0339 | 100 | STM3639 | 66     | STM0339 | 100   |
| 1835575 gtgtcactttct - | STM1741 | 100 | STM1283 | 58.416 | STM1741 | 100   |
| 1678166 ttgatggattal - | STM1589 | 100 | STM0621 | 58     | STM1589 | 100   |
| 1933516 atgtcgtttacc - | STM1835 | 100 | STM2221 | 65.049 | STM1835 | 100   |
| 1720022 atgcctatnttc + | STM1629 | 100 |         |        | STM1629 | 100   |
| 1977583 atgaaaaact -   | STM1884 | 100 | STM0125 | 60.194 | STM1884 | 100   |
| 2027743 atggcagctg +   | STM1932 | 100 | STM1935 | 70     | STM1932 | 100   |
| 576485 atgaaacttg +    | STM0515 | 100 | STM2777 | 77     | STM0515 | 100   |
| 600520 atgttaaaaaal +  | STM0537 | 100 | STM2155 | 68     | STM0537 | 100   |
| 633173 atgtctgttgct -  | STM0572 | 100 | STM3601 | 77     | STM0572 | 100   |
| 444874 gtgcgtattgg +   | STM0393 | 100 | STM1220 | 62     | STM0393 | 100   |
| 3313762 atgactggag -   | STM3150 | 100 | STM1539 | 65.049 | STM3150 | 100   |
| 2978054 atgttcaagc -   | STM2831 | 100 | STM3666 | 66.346 | STM2831 | 100   |
| 3819092 gtggcacact -   | STM3632 | 100 | STM0611 | 60.396 | STM3632 | 100   |
| 4764087 atggctggaa +   | STM4509 | 100 | STM3131 | 70     | STM4509 | 100   |
| 2506993 atgaaaaaaal -  | STM2395 | 100 | STM3685 | 64.423 | STM2395 | 100   |
| 3966594 atgggttccac +  | STM3765 | 100 | STM3572 | 58.333 | STM3765 | 100   |
| 3144173 atgataaagg +   | STM2992 | 100 |         |        | STM2992 | 100   |
| 3187730 atgacagaat -   | STM3026 | 100 |         |        | STM3026 | 100   |
| 3265348 gtggttcgac -   | STM3105 | 100 | STM0452 | 60.952 | STM3105 | 100   |
| 523140 atgagtcaga -    | STM0464 | 100 |         |        | STM0464 | 100   |

|                        |         |     |         |        |         |       |
|------------------------|---------|-----|---------|--------|---------|-------|
| 2951065 atgccgcgct -   | STM2803 | 100 | STM4028 | 63.462 | STM2803 | 100   |
| 3921103 atgcaaaaa+ +   | STM3725 | 100 | STM4168 | 64.706 | STM3725 | 100   |
| 3124412 atgctcgcctc +  | STM2972 | 100 | STM3999 | 60     | STM2972 | 100   |
| 3179228 gtggacgtaa -   | STM3018 | 100 | STM0537 | 62.136 | STM3018 | 100   |
| 3243333 atgtcaacaa -   | STM3081 | 100 | STM2272 | 65     | STM3081 | 100   |
| 3285434 atgtcctccgt -  | STM3125 | 100 |         |        | STM3125 | 100   |
| 2975915 atggctatcg -   | STM2829 | 100 | STM2858 | 59.804 | STM2829 | 100   |
| 2201505 atgttaacaa -   | STM2117 | 100 | STM0957 | 57     | STM2117 | 100   |
| 2344711 gtgattccctc -  | STM2243 | 100 | STM0926 | 96     | STM2243 | 100   |
| 3908250 atgcgggtttt +  | STM3712 | 100 | STM3592 | 72.816 | STM3712 | 100   |
| 3593786 atgccacgttc -  | STM3436 | 100 | STM1975 | 59     | STM3436 | 100   |
| 3493851 atgcagttac -   | STM3329 | 100 | STM3576 | 64.706 | STM3329 | 100   |
| 3421427 atgaacataa -   | STM3251 | 100 | STM1216 | 69     | STM3251 | 100   |
| 3763083 atgaatacaa +   | STM3592 | 100 | STM1452 | 74     | STM3592 | 100   |
| 1029236 atgaaacag -    | STM0951 | 100 |         |        | STM0951 | 100   |
| 4686410 atggaagag +    | STM4444 | 100 | STM0706 | 62.963 | STM4444 | 100   |
| 4825860 atggcaactc +   | STM4570 | 100 | STM0067 | 60.377 | STM4570 | 100   |
| 398283 atgcgtagaa -    | STM0352 | 100 | STM2126 | 64     | STM0352 | 100   |
| 1380493 atgcgccgae +   | STM1300 | 100 | STM3369 | 64.078 | STM1300 | 100   |
| 4574498 atgaatgaac -   | STM4328 | 100 |         |        | STM4328 | 98.34 |
| 2968993 gtgagtgcg -    | STM2819 | 100 | STM1577 | 63.366 | STM2819 | 100   |
| 2294048 atggagagtt -   | STM2196 | 100 | STM2971 | 78     | STM2196 | 100   |
| 2334456 atgagcataa -   | STM2233 | 100 | STM0588 | 49.515 | STM2233 | 100   |
| 2247041 atgaaaatati -  | STM2151 | 100 | STM0339 | 61.905 | STM2151 | 100   |
| 2276756 atgactcaac -   | STM2179 | 100 | STM1106 | 67.273 | STM2179 | 100   |
| 1486451 atgaatcgaa +   | STM1400 | 100 | STM4152 | 50.962 | STM1400 | 100   |
| 1160893 atgaaatata +   | STM1069 | 100 | STM3584 | 62.136 | STM1069 | 100   |
| 828327 gtgtataatgc -   | STM0764 | 100 | STM4511 | 61.765 | STM0764 | 100   |
| 901692 atgaattcaat -   | STM0834 | 100 | STM4250 | 67     | STM0834 | 100   |
| 1381748 atgaaattgti -  | STM1302 | 100 |         |        | STM1302 | 100   |
| 3420240 atggccaata +   | STM3250 | 100 | STM0650 | 67     | STM3250 | 100   |
| 880719 atgtttcatcgc -  | STM0815 | 100 | STM0816 | 63     | STM0815 | 100   |
| 3218339 gtgcaaagtg -   | STM3056 | 100 | STM0671 | 72     | STM3056 | 100   |
| 2047579 atgaaagaa -    | STM1958 | 100 | STM3273 | 63.81  | STM1958 | 100   |
| 3393245 atgaactactgt + | STM3224 | 100 | STM0600 | 83.168 | STM3224 | 100   |
| 3236349 atgttgacgtt +  | STM3075 | 100 | STM2441 | 73     | STM3075 | 93.59 |
| 1184863 atgaaacgat +   | STM1097 | 100 | STM0784 | 58     | STM1097 | 100   |
| 3018765 atggaaaatc +   | STM2875 | 100 | STM4315 | 68     | STM2875 | 100   |
| 3958187 atgttagcctg -  | STM3758 | 100 | STM2857 | 58.416 | STM3758 | 100   |
| 3328383 atgacctgca +   | STM3167 | 100 |         |        | STM3167 | 100   |
| 1489752 atggatattgc +  | STM1406 | 100 | STM1781 | 66     | STM1406 | 100   |
| 1195412 atgagcgcac +   | STM1107 | 100 | STM2290 | 75     | STM1107 | 100   |
| 844374 atgtcatcgttc -  | STM0778 | 100 | STM0942 | 66.019 | STM0778 | 100   |
| 2599049 atggactggc +   | STM2484 | 100 |         |        | STM2484 | 100   |
| 2680047 atggccttatt -  | STM2539 | 100 | STM0012 | 67     | STM2539 | 100   |
| 2597690 atgattaccct +  | STM2482 | 100 | STM4192 | 62.136 | STM2482 | 100   |
| 539102 atgtcgcttga -   | STM0480 | 100 | STM2323 | 61.165 | STM0480 | 100   |
| 1897099 atgggaattal -  | STM1797 | 100 | STM1274 | 69     | STM1797 | 100   |
| 4416617 atggcactcc -   | STM4194 | 100 | STM2941 | 62     | STM4194 | 100   |
| 4787470 atgtttgatact - | STM4531 | 100 | STM0601 | 77     | STM4531 | 100   |
| 3688532 atggaacaat -   | STM3525 | 100 | STM4049 | 65     | STM3525 | 95.61 |
| 3734307 atgaagctga +   | STM3565 | 100 | STM2147 | 61.682 | STM3565 | 100   |

|         |               |         |        |         |        |         |       |
|---------|---------------|---------|--------|---------|--------|---------|-------|
| 4560885 | ttgagatatct-  | STM4314 | 100    | STM1461 | 64.762 | STM4314 | 100   |
| 4437412 | atgcgaaaa-    | STM4218 | 100    | STM2404 | 48.544 | STM4218 | 100   |
| 2873769 | atggctgattc-  | STM2731 | 100    | STM3534 | 62.857 | STM2731 | 100   |
| 3844362 | atgcagccta+   | STM3658 | 100    |         |        | STM3658 | 100   |
| 4830363 | atgaaaaaa-    | STM4574 | 100    | STM4575 | 64.706 | STM4574 | 100   |
| 364470  | atgacacagc+   | STM0318 | 100    | STM1187 | 67     | STM0318 | 100   |
| 5020    | atgaaactct+   | STM0004 | 100    | STM1802 | 63.107 | STM0004 | 99.76 |
| 1562342 | gtgggggtga-   | STM1485 | 100    | STM1432 | 48     | STM1485 | 100   |
| 1515023 | gtggccgagc+   | STM1438 | 100    | STM1641 | 59     | STM1438 | 63.49 |
| 34368   | atgcgccaæ+    | STM0030 | 100    | STM1204 | 64.486 | STM0030 | 100   |
| 74838   | atgcatgaag+   | STM0064 | 100    | STM2918 | 61.386 | STM0064 | 100   |
| 34816   | atgactattat-  | STM0031 | 100    | STM0029 | 67     | STM0031 | 100   |
| 39534   | atgaaaaata-   | STM0034 | 100    | STM2423 | 66     | STM0034 | 100   |
| 1246380 | atgctgctct-   | STM1159 | 100    | STM0816 | 52.941 | STM1159 | 100   |
| 2622272 | gtggacgtac+   | STM2508 | 100    | STM2011 | 57.282 | STM2508 | 100   |
| 3439538 | atgctaattcg-  | STM3272 | 100    | STM0571 | 63.107 | STM3272 | 100   |
| 3398430 | atgattctctc+  | STM3232 | 100    | STM3616 | 61     | STM3232 | 100   |
| 969841  | atgaacacaç+   | STM0899 | 100    | STM0899 | 58.095 | STM0899 | 100   |
| 1074667 | atggatcatcç+  | STM0987 | 100    | STM2223 | 53.398 | STM0987 | 100   |
| 992115  | atggagacat+   | STM0919 | 100    | STM2593 | 77     | STM0919 | 100   |
| 822020  | atggatttttta+ | STM0757 | 100    | STM3911 | 65     | STM0757 | 100   |
| P45996  | gtgatgtcgaç+  | PSLT053 | 100    | STM4323 | 72.549 | PSLT053 | 100   |
| P82669  | gtgaacgaaç+   | PSLT101 | 100    | STM4163 | 75     | PSLT101 | 100   |
| P54192  | gtgcgaacg+    | PSLT065 | 100    | STM2948 | 62.745 | PSLT065 | 100   |
| P62998  | atgagcgcta+   | PSLT077 | 100    |         |        | PSLT077 | 100   |
| P13341  | gtgtcatttcat- | PSLT017 | 100    | STM3028 | 64     | PSLT017 | 100   |
| P09423  | atgttaaaatt-  | PSLT014 | 100    | STM2102 | 61.165 | PSLT014 | 100   |
| P50166  | atgtcccgtttæ+ | PSLT059 | 100    | STM3681 | 61.905 | PSLT059 | 100   |
| 2016417 | atgtttaaccg-  | STM1919 | 100    | STM3577 | 62.745 | STM1919 | 100   |
|         |               | STM0038 | 100    | STM0032 | 76     | STM0038 | 100   |
|         |               | STM0101 | 100    | STM3677 | 77     | STM0101 | 100   |
|         |               | STM0234 | 100    | STM2559 | 79     | STM0234 | 100   |
| 336645  | atgtatgaagi+  | STM0291 | 100    |         |        | STM0291 | 100   |
|         |               | STM0973 | 100    | STM3241 | 79     | STM0973 | 100   |
|         |               | STM1005 | 100    | STM0893 | 75     | STM1005 | 100   |
|         |               | STM1032 | 100    | STM0911 | 79     | STM1032 | 100   |
|         |               | STM1038 | 100    | STM0916 | 75     | STM1038 | 100   |
|         |               | STM3391 | 100    | STM0475 | 80     | STM3391 | 100   |
|         |               | STM4467 | 58     | STM2953 | 49.505 | STM4467 | 38.43 |
|         |               | STM3923 | 100    | STM2095 | 77     | STM2095 | 61.5  |
|         |               | STM4426 | 60.396 | STM3029 | 39.604 | STM4426 | 23.19 |
|         |               | STM2702 | 87     | STM2772 | 76     | STM2702 | 72.1  |
|         |               | STM0481 | 47.573 |         |        | STM0481 | 4.34  |
|         |               | STM1515 | 100    | STM3176 | 62     | STM1515 | 88.83 |
|         |               | STM2630 | 58.824 | STM1670 | 50.485 | STM2630 | 47.99 |
|         |               | STM3136 | 60     | STM2514 | 44.554 | STM3136 | 10.76 |
|         |               | STM2492 | 99     | STM3247 | 79     | STM3247 | 61.96 |
|         |               | STM3640 | 61.538 | STM0543 | 60.577 | STM3640 | 33.6  |
|         |               | STM1021 | 40.566 | STM2619 | 40.566 | STM1021 | 15.63 |
|         |               | STM2767 | 61.765 | STM2238 | 60.952 | STM4040 | 38.71 |

|         |        |         |        |         |       |
|---------|--------|---------|--------|---------|-------|
| STM0747 | 61.538 | STM4517 | 61.321 | STM4517 | 21.13 |
| STM2702 | 87     | STM2772 | 76     | STM2702 | 71.22 |
| STM2746 | 62.376 | STM0272 | 61.765 | STM0272 | 12.79 |
| STM0296 | 83     | STM0395 | 51.923 | STM0296 | 50.14 |
| STM0437 | 64     | STM0045 | 59.804 | STM0437 | 31.84 |
| STM0598 | 64.423 | STM0927 | 61.682 | STM2586 | 32.23 |
| STM4491 | 59     |         |        | STM4491 | 6.45  |
| STM1194 | 61     | STM3104 | 60     | STM1194 | 11.73 |
| STM4280 | 64.706 | STM4399 | 61.538 | STM4392 | 11.74 |
| STM4004 | 61.321 | STM2490 | 59.223 | STM4004 | 9.75  |
| STM0926 | 63.366 | STM4539 | 62.857 | STM4539 | 3     |
| STM4284 | 58.252 |         |        | STM4284 | 10.52 |
| STM3172 | 65.385 | STM1009 | 61.321 | STM3172 | 16.65 |
| STM4287 | 62.264 | STM2754 | 56.19  | STM4287 | 15.05 |

|                        |         |     |         |         |         |
|------------------------|---------|-----|---------|---------|---------|
| 3038376 atgcaacattt -  | STM2895 | 100 |         | STM2895 | 100     |
| 546685 atgcgattatt +   | STM0488 | 100 | STM2224 | 61      | STM0488 |
| 2106724 atgttgagcgt -  | STM2027 | 100 | STM2128 | 67      | STM2027 |
| 3989042 atgcttcgtttt - | STM3788 | 100 | STM2198 | 68.317  | STM3788 |
| 70869 atgagaccac +     | STM0060 | 100 | STM0622 | 79      | STM0060 |
| 103484 atgaataatc -    | STM0090 | 100 |         |         | STM0090 |
| 273030 atgtctgaac +    | STM0231 | 100 | STM3263 | 75      | STM0231 |
| 3474837 atggaaagc +    | STM3306 | 100 | STM2749 | 64      | STM3306 |
| 3512798 atggctgaaa -   | STM3344 | 100 | STM0844 | 59.259  | STM3344 |
| 3549102 atgaaaaag +    | STM3377 | 100 | STM4489 | 61.905  | STM3377 |
| 702020 atgacggata -    | STM0639 | 100 | STM0127 | 64.078  | STM0639 |
| 727335 atgattaccct -   | STM0662 | 100 | STM0891 | 75      | STM0662 |
| 200610 atggcagaa -     | STM0169 | 100 | PSLT039 | 56.731  | STM0169 |
| 218281 atgtctgagc -    | STM0188 | 100 | STM4347 | 62.376  | STM0188 |
| 264793 atggcgatga +    | STM0224 | 100 |         |         | STM0224 |
| 1587535 atgcaaaac +    | STM1508 | 100 | STM3136 | 80      | STM1508 |
| 1616424 atgatgaaa +    | STM1540 | 100 | STM0814 | 58.252  | STM1540 |
| 4033944 atgactctca -   | STM3830 | 100 | STM3592 | 63.462  | STM3830 |
| 3738082 atgaataggc -   | STM3569 | 100 | STM0192 | 90.099  | STM3569 |
| 4813796 atgatgaagt +   | STM4559 | 100 | STM0196 | 56.19   | STM4559 |
| 298087 atgcctctcgc +   | STM0257 | 100 | STM1522 | 74.757  | STM0257 |
| 355041 atgatgatttg -   | STM0309 | 100 | STM3920 | 66      | STM0309 |
| 376629 atgagtacac +    | STM0332 | 100 |         |         | STM0332 |
| 1160255 ttgaccattac -  | STM1068 | 100 | STM1383 | 60.577  | STM1068 |
| 2863042 atgaaaaag -    | STM2720 | 100 |         |         | STM2720 |
| 339275 atgctcggttt +   | STM0294 | 100 | STM1672 | 61.905  | STM0294 |
| 2910980 atgacaaa +     | STM2768 | 100 | STM4367 | 62.136  | STM2768 |
| 1165845 atgttaagtcc -  | STM1073 | 100 | STM2578 | 62.857  | STM1073 |
| 1205819 atggcaaaag -   | STM1119 | 100 | STM0041 | 48.571  | STM1119 |



|         |                |         |     |         |        |         |       |
|---------|----------------|---------|-----|---------|--------|---------|-------|
| 1244808 | atgccagtgtt +  | STM1156 | 100 | STM1766 | 65.094 | STM1156 | 100   |
| 4202780 | gtgaatctgg:-   | STM3994 | 100 | STM4256 | 72     | STM3994 | 100   |
| 1192216 | atgccgcact +   | STM1104 | 100 | STM3239 | 61.165 | STM1104 | 100   |
| 1227986 | gtgtgcgtgat +  | STM1138 | 100 |         |        | STM1138 | 100   |
| 1280349 | atgagcacta +   | STM1196 | 100 | STM0920 | 58.559 | STM1196 | 100   |
| 1302341 | atgcctgaaa -   | STM1216 | 100 | STM0788 | 74.51  | STM1216 | 100   |
| 3708281 | atgtccagtc:-   | STM3538 | 100 | STM4465 | 66.038 | STM3538 | 100   |
| 1237953 | atgatgaaaa +   | STM1150 | 100 | STM1622 | 70.874 | STM1150 | 100   |
| 3652319 | atgagcacc:-    | STM3495 | 100 | STM4401 | 64.423 | STM3495 | 100   |
| 3682580 | atgatgaatta -  | STM3519 | 100 | STM0314 | 62.136 | STM3519 | 99.92 |
| 1359778 | atgaattgca -   | STM1283 | 100 | STM2672 | 83     | STM1283 | 100   |
| 4222097 | atgaataaca -   | STM4012 | 100 |         |        | STM4012 | 100   |
| 4296716 | atgagtcaaa -   | STM4087 | 100 | STM2037 | 79     | STM4087 | 100   |
| 4418646 | atgattattgtt - | STM4196 | 100 | STM2782 | 62     | STM4196 | 100   |
| 4433964 | atggctgga -    | STM4212 | 100 | STM1000 | 63     | STM4212 | 100   |
| 4507495 | atgtctacgcc +  | STM4268 | 100 | STM3851 | 65     | STM4268 | 100   |
| 4554309 | gtgacgcctaa +  | STM4305 | 100 | STM1498 | 77     | STM4305 | 100   |
| 3081901 | atgacaacgt -   | STM2941 | 100 | STM3056 | 63.725 | STM2941 | 100   |
| 960287  | atgaacgaat -   | STM0889 | 100 | STM2353 | 68.932 | STM0889 | 100   |
| 2531578 | atgaaaatca -   | STM2415 | 100 | STM2272 | 63.725 | STM2415 | 100   |
| 988653  | gtgatgcaac +   | STM0917 | 100 | STM2595 | 84     | STM0917 | 100   |
| 1017518 | atgattctcga +  | STM0939 | 100 | STM2481 | 60.377 | STM0939 | 100   |
| 1095072 | atgcatgagc +   | STM1002 | 100 | STM3905 | 81.373 | STM1002 | 100   |
| 4420439 | atgactcaat:-   | STM4199 | 100 | STM1009 | 59.615 | STM4199 | 100   |
| 4326992 | atgcccctga -   | STM4110 | 100 | STM2432 | 83     | STM4110 | 100   |
| 4532472 | atgctgaaaa +   | STM4290 | 100 | STM0212 | 90     | STM4290 | 100   |
| 4580176 | atggcgactt:-   | STM4334 | 100 | STM2211 | 61     | STM4334 | 100   |
| 2494537 | atgaaaaaa:-    | STM2383 | 100 | STM0447 | 73     | STM2383 | 100   |
| 2536708 | atgaaaaaa:+    | STM2423 | 100 | STM0034 | 66     | STM2423 | 100   |
| 2586964 | atgcgctacc -   | STM2476 | 100 |         |        | STM2476 | 100   |
| 2621402 | gtgagtcagg +   | STM2505 | 100 | STM2506 | 100    | STM2506 | 100   |
| 3021517 | atgccacattt +  | STM2876 | 100 | STM0608 | 61.386 | STM2876 | 100   |
| 4596144 | atgaaaaaa:-    | STM4351 | 100 | STM0887 | 73     | STM4351 | 100   |
| 4631230 | atgaccaacc +   | STM4392 | 100 | STM1712 | 61.321 | STM4392 | 100   |
| 2358904 | atgaaactca -   | STM2259 | 100 | STM2752 | 69.307 | STM2259 | 100   |
| 4727112 | atgccattaat -  | STM4482 | 100 | STM3512 | 75     | STM4482 | 100   |
| 2447061 | atggaaatga -   | STM2335 | 100 | STM3282 | 62.617 | STM2335 | 100   |
| 2438290 | atggatgaaca -  | STM2326 | 100 | STM3241 | 64.078 | STM2326 | 100   |
| 4794832 | atgcgcaaa:-    | STM4534 | 100 | STM4005 | 75     | STM4534 | 100   |
| 2043990 | atgaaattag:-   | STM1954 | 100 | STM0890 | 60     | STM1954 | 100   |
| 3597850 | atgaaaggtc:-   | STM3443 | 100 | STM0447 | 63.366 | STM3443 | 100   |
| 1166310 | atgctgaccg -   | STM1074 | 100 |         |        | STM1074 | 100   |
| 1308724 | atgaaaaaa:-    | STM1222 | 100 | STM0877 | 65.347 | STM1222 | 100   |
| 2578045 | atgaaaaaa:-    | STM2468 | 100 | STM4252 | 61.538 | STM2468 | 100   |
| 1312046 | atgaagaac:-    | STM1225 | 100 | STM0879 | 67     | STM1225 | 100   |
| 1408077 | gtgaacaaat -   | STM1328 | 100 | STM0850 | 50.495 | STM1328 | 100   |
| 4615573 | atgggaatttt:+  | STM4371 | 100 | PSLT016 | 62.376 | STM4371 | 100   |
| 4643058 | atgaccttac:-   | STM4405 | 100 | STM0221 | 61.765 | STM4405 | 100   |
| 4672356 | atgccagctc -   | STM4428 | 100 | STM2372 | 75     | STM4428 | 100   |
| 1232473 | atgcatacttt:+  | STM1145 | 100 | STM3538 | 48     | STM1145 | 100   |
| 1960421 | atgcgcaag:-    | STM1862 | 100 | STM2986 | 66.99  | STM1862 | 100   |
| 1847696 | atgagcgaag +   | STM1751 | 100 | STM2799 | 68     | STM1751 | 100   |

|                       |         |             |                |       |
|-----------------------|---------|-------------|----------------|-------|
| 1258090 atgcaaactg-   | STM1173 | 100 STM2513 | 61.538 STM1173 | 100   |
| 2168620 atgcttatatc-  | STM2087 | 100 STM0724 | 60.952 STM2087 | 100   |
| 3997605 atggcaagtt-   | STM3796 | 100 STM3901 | 74 STM3796     | 100   |
| 4074090 atggcaatga-   | STM3864 | 100 STM2406 | 60.55 STM3864  | 100   |
| 2782050 atgatgacaa+   | STM2641 | 100 STM0734 | 68 STM2641     | 100   |
| 285003 atgagcagct-    | STM0243 | 100 STM2644 | 61.765 STM0243 | 100   |
| 109236 atgcagactg+    | STM0094 | 100 STM4220 | 64.762 STM0094 | 100   |
| 2493713 atggacaatt-   | STM2382 | 100 STM4269 | 71.287 STM2382 | 100   |
| 1423511 atgattgcttc+  | STM1344 | 100 STM0426 | 63.366 STM1344 | 100   |
| 1427433 atggataatg-   | STM1348 | 100 STM0173 | 62.857 STM1348 | 100   |
| 1090872 atgatgaagc-   | STM0999 | 100 STM2267 | 78 STM0999     | 100   |
| 3731410 atgaaaccgc-   | STM3562 | 100         | STM3562        | 100   |
| 1493245 atggtaaga+    | STM1412 | 100 STM3133 | 61.386 STM1412 | 100   |
| 2355729 atggcaaatc-   | STM2257 | 100 STM0692 | 52.475 STM2257 | 100   |
| 319164 atgtctatga+    | STM0279 | 100 STM0276 | 99 STM0279     | 100   |
| 4812166 atgtctgctttt- | STM4556 | 100 STM0231 | 67 STM4556     | 100   |
| 3832653 ttgaccacgc-   | STM3644 | 100 STM3822 | 72 STM3644     | 100   |
| 3428100 gtgaaagaa+    | STM3257 | 100 STM1698 | 63.366 STM3257 | 100   |
| 3449137 atgaagcctt-   | STM3281 | 100         | STM3281        | 100   |
| 2530109 atgaaaagai+   | STM2414 | 100 STM2979 | 63 STM2414     | 100   |
| 2654857 gtggaaattta-  | STM2521 | 100 STM2522 | 90 STM2521     | 89.22 |
| 571942 atgggattgc+    | STM0510 | 100 STM0245 | 76 STM0510     | 100   |
| 668945 atggctaacc-    | STM0606 | 100 STM0634 | 64 STM0606     | 100   |
| 2751921 atgggattgtt-  | STM2603 | 100 STM2816 | 66 STM2603     | 100   |
| 4832429 atgacaacat-   | STM4576 | 100 STM2350 | 62.963 STM4576 | 100   |
| 3855409 atgagccagc-   | STM3667 | 100 STM4187 | 58.095 STM3667 | 100   |
| 3780070 atgcaggtaa-   | STM3606 | 100 STM1142 | 63 STM3606     | 100   |
| 3775248 atgatcgagc-   | STM3602 | 100 STM0789 | 59 STM3602     | 100   |
| 3444037 atggggcgta-   | STM3277 | 100 STM0312 | 74 STM3277     | 100   |
| 4702958 atggtaagat-   | STM4457 | 100 STM3334 | 51.456 STM4457 | 100   |
| 1463083 atgaaaaaa-    | STM1379 | 100 STM2068 | 64 STM1379     | 100   |
| 4536027 atgttaaagc-   | STM4293 | 100 STM3635 | 61 STM4293     | 100   |
| 1254699 gtgagaacat+   | STM1169 | 100 STM0820 | 65.714 STM1169 | 100   |
| 2568612 atgaaactaa-   | STM2458 | 100 STM3200 | 62.376 STM2458 | 100   |
| 4238648 atgattgcatt+  | STM4028 | 100 STM2803 | 64 STM4028     | 100   |
| 695827 atgagtaaac-    | STM0633 | 100 STM4532 | 53.465 STM0633 | 100   |
| 1499654 atgaatgattc+  | STM1420 | 100 STM1980 | 66 STM1420     | 100   |
| 2113801 atggcggcac-   | STM2035 | 100         | STM2035        | 100   |
| 3894939 atgccgtgtg-   | STM3699 | 100 STM2913 | 61.538 STM3699 | 100   |
| 877112 atggctaaat-    | STM0811 | 100 STM1802 | 63.81 STM0811  | 100   |
| 848198 atgctggagc+    | STM0783 | 100 STM0891 | 71 STM0783     | 100   |
| 1461338 atgaaaaag-    | STM1378 | 100 STM1888 | 79 STM1378     | 100   |
| 2462907 atgatgtcag-   | STM2351 | 100 STM1951 | 82 STM2351     | 100   |
| 133738 atgagccagc-    | STM0113 | 100         | STM0113        | 100   |
| 245919 atgaaaaaa+     | STM0209 | 100 STM3348 | 88 STM0209     | 100   |
| 508377 gtgaataaat+    | STM0451 | 100 STM4170 | 76 STM0451     | 100   |
| 3581147 atgaaaattal+  | STM3409 | 100 STM1801 | 62.136 STM3409 | 100   |
| 3024660 atgaatatgg-   | STM2881 | 100 STM1196 | 55.882 STM2881 | 100   |
| 608660 atgaagaag+     | STM0546 | 100 STM0023 | 77 STM0546     | 100   |
| 795817 atgccgattct-   | STM0729 | 100 STM2253 | 64.151 STM0729 | 100   |
| 807946 atgtccgtttta+  | STM0739 | 100 STM4416 | 64.486 STM0739 | 100   |
| 4391164 gtgatacgcg+   | STM4174 | 100 STM1691 | 79 STM4174     | 100   |

|         |               |         |     |         |        |         |       |
|---------|---------------|---------|-----|---------|--------|---------|-------|
| 3763933 | gtgcaaatct-   | STM3593 | 100 | STM2565 | 62.5   | STM3593 | 100   |
| 2119622 | atgagatcga+   | STM2040 | 100 | STM3638 | 70     | STM2040 | 100   |
| 3027786 | atgcttaatatt- | STM2883 | 100 | STM0498 | 64.356 | STM2883 | 100   |
| 2431897 | atgagttggai-  | STM2322 | 100 | STM2850 | 61.765 | STM2322 | 100   |
| 3531967 | atgggcatttt-  | STM3364 | 100 | STM1441 | 62.376 | STM3364 | 100   |
| 4478489 | atggaagac+    | STM4257 | 100 | STM4258 | 100    | STM4258 | 60.09 |
| 2811465 | atgggttgctga- | STM2669 | 100 | STM0154 | 63.725 | STM2669 | 100   |
| 1229301 | atgcgtgtaa-   | STM1140 | 100 | STM0041 | 53.465 | STM1140 | 100   |
| 4235721 | atggttcgatt+  | STM4024 | 100 | STM1333 | 66.019 | STM4024 | 100   |
| 4386522 | atgttacaaa+   | STM4169 | 100 | STM2791 | 60.377 | STM4169 | 100   |
| 2992578 | atgagcgaar-   | STM2846 | 100 | STM2272 | 60.396 | STM2846 | 100   |
| 4227191 | atgtctaata-   | STM4017 | 100 | STM4018 | 84     | STM4017 | 100   |
| 735911  | atgactaaaa-   | STM0670 | 100 | PSLT048 | 62     | STM0670 | 100   |
| 514130  | atgaggctac-   | STM0456 | 100 | STM0109 | 67.327 | STM0456 | 100   |
| 4517540 | atggcaagg+    | STM4277 | 100 | STM0646 | 62.037 | STM4277 | 100   |
| 1763182 | gtggtttttcta- | STM1669 | 100 | STM2517 | 63.725 | STM1669 | 100   |
| 3554610 | atgccatgga+   | STM3383 | 100 | STM3261 | 64.706 | STM3383 | 100   |
| 3140856 | atgaaaggai-   | STM2988 | 100 | STM1303 | 60     | STM2988 | 100   |
| 3059451 | atgacgatac-   | STM2916 | 100 | STM2974 | 50     | STM2916 | 100   |
| 4269749 | atgataggaa-   | STM4058 | 100 | STM2130 | 64     | STM4058 | 100   |
| 937502  | atgaaacgr-    | STM0864 | 100 | STM3794 | 70     | STM0864 | 100   |
| 4150867 | atgaacgac-    | STM3943 | 100 | STM2402 | 65.138 | STM3943 | 100   |
| 4113837 | atgcctaagt+   | STM3904 | 100 | STM3531 | 68     | STM3904 | 100   |
| 86651   | atggattcaa-   | STM0073 | 100 | STM1356 | 73     | STM0073 | 100   |
| 4110879 | atgcaacatc+   | STM3902 | 100 | STM2982 | 59.048 | STM3902 | 100   |
| 2658405 | atgaatactg-   | STM2524 | 100 | STM1491 | 63.462 | STM2524 | 99.7  |
| 1912794 | atgtcaaca+    | STM1814 | 100 |         |        | STM1814 | 95.93 |
| 1826913 | atgaattatac+  | STM1730 | 100 |         |        | STM1730 | 100   |
| 3126316 | atggaacgai-   | STM2974 | 100 | STM4285 | 65.455 | STM2974 | 100   |
| 3076596 | atgtttccgc+   | STM2936 | 100 | STM3899 | 88     | STM2936 | 100   |
| 4168672 | gtggcgctac+   | STM3963 | 100 | STM3964 | 100    | STM3963 | 100   |
| 4146005 | atgacggtaa-   | STM3938 | 100 |         |        | STM3938 | 100   |
| 4362400 | atgagtgcca+   | STM4147 | 100 | STM1256 | 63.889 | STM4147 | 100   |
| 1924743 | gtgattagcct+  | STM1826 | 100 | STM2971 | 87     | STM1826 | 95.99 |
| 1870353 | atgacacatg+   | STM1771 | 100 | STM4189 | 62.5   | STM1771 | 100   |
| 1880518 | gtgatgccttc+  | STM1781 | 100 | STM2913 | 86     | STM1781 | 100   |
| 1931218 | gtgagcgaar+   | STM1832 | 100 | STM0574 | 67     | STM1832 | 100   |
| 1969541 | atgatgctgai-  | STM1874 | 100 | STM2497 | 66.667 | STM1874 | 100   |
| 1996883 | atgcgtacag-   | STM1901 | 100 | STM3040 | 69     | STM1901 | 100   |
| 580037  | atgttacgttc+  | STM0518 | 100 | STM2915 | 62.376 | STM0518 | 100   |
| 602360  | atgcctaccg-   | STM0540 | 100 | STM3737 | 85     | STM0540 | 100   |
| 623873  | atgaataaga-   | STM0567 | 100 |         |        | STM0567 | 100   |
| 1672142 | atgaaaacaa+   | STM1584 | 100 | STM0568 | 69.307 | STM1584 | 100   |
| 1707358 | atgagccaar+   | STM1618 | 100 | STM1117 | 68.932 | STM1618 | 99.25 |
| 1638135 | atgacaaca-    | STM1558 | 100 | STM3537 | 74     | STM1558 | 100   |
| 1903987 | atgaggttgt-   | STM1803 | 100 | STM3855 | 61.386 | STM1803 | 100   |
| 1718791 | atgaaatcac-   | STM1627 | 100 | STM1567 | 66     | STM1627 | 100   |
| 1730353 | atgggcaata-   | STM1639 | 100 | STM1253 | 65     | STM1639 | 100   |
| 1760250 | atggctaaaa-   | STM1667 | 100 | STM0370 | 89     | STM1667 | 100   |
| 1798524 | atgatgaaac+   | STM1703 | 100 | STM3388 | 71     | STM1703 | 100   |
| 690337  | atgacagaar+   | STM0626 | 100 | STM0052 | 67     | STM0626 | 100   |
| 1073157 | atgattgcgc+   | STM0985 | 100 | STM3695 | 72     | STM0985 | 100   |

|         |                |         |     |         |        |         |     |
|---------|----------------|---------|-----|---------|--------|---------|-----|
| 1045084 | atgctcgatcc+   | STM0963 | 100 | STM3094 | 63.551 | STM0963 | 100 |
| 3259814 | atgcatcacæ-    | STM3098 | 100 |         |        | STM3098 | 100 |
| 516154  | atgatgagtaç-   | STM0458 | 100 | STM2162 | 63.725 | STM0458 | 100 |
| 3771035 | atgaaaattaç-   | STM3598 | 100 | STM3106 | 72     | STM3598 | 100 |
| 3207898 | atggcttttatc+  | STM3048 | 100 | STM2099 | 60     | STM3048 | 100 |
| 3874791 | atgaaactca-    | STM3684 | 100 | STM0652 | 65.686 | STM3684 | 100 |
| 3952770 | atggcagacæ+    | STM3755 | 100 | STM2530 | 77.67  | STM3755 | 100 |
| 3342803 | atgaaattgaç+   | STM3178 | 100 | STM4291 | 77     | STM3178 | 100 |
| 2824925 | atgttgcgccæ+   | STM2684 | 100 | STM4544 | 60.784 | STM2684 | 100 |
| 3206421 | gtggctctgtg-   | STM3046 | 100 | STM3618 | 61.682 | STM3046 | 100 |
| 3282325 | gtgaaaaaaç-    | STM3122 | 100 | STM1032 | 53.398 | STM3122 | 100 |
| 3752958 | atgcbgcat-     | STM3585 | 100 | STM2253 | 63.81  | STM3585 | 100 |
| 3806235 | atgaggacæ+     | STM3622 | 100 | STM1885 | 64.078 | STM3622 | 100 |
| 3942643 | atgccgtaa+     | STM3747 | 100 | STM2497 | 79.412 | STM3747 | 100 |
| 2814716 | atgaataagc+    | STM2672 | 100 | STM1283 | 83     | STM2672 | 100 |
| 2851941 | gtgcaaattgç-   | STM2702 | 100 | STM2772 | 78     | STM2702 | 100 |
| 3252847 | atggcaaaaç+    | STM3090 | 100 | STM1907 | 64.762 | STM3090 | 100 |
| 500075  | atgtcaagtcæ-   | STM0444 | 100 |         |        | STM0444 | 100 |
| 3767435 | atgaaactac-    | STM3595 | 100 | STM0325 | 65     | STM3595 | 100 |
| 2218647 | atgcaggatt+    | STM2127 | 100 | STM2128 | 73     | STM2127 | 100 |
| 2268763 | atgaccaaçç-    | STM2171 | 100 | STM1383 | 62     | STM2171 | 100 |
| 3582769 | atgtggttact-   | STM3413 | 100 | STM2223 | 61.111 | STM3413 | 100 |
| 1021672 | atgacggcat+    | STM0942 | 100 | STM0891 | 76     | STM0942 | 100 |
| 4629639 | atgcaaaaçç+    | STM4388 | 100 | STM3677 | 78     | STM4388 | 100 |
| 4723454 | gtgataatcat+   | STM4479 | 100 | STM3024 | 66     | STM4479 | 100 |
| 1006517 | atgaaagcçç+    | STM0931 | 100 | STM2308 | 63.725 | STM0931 | 100 |
| 4611026 | gtgcagttaar+   | STM4367 | 100 | STM2768 | 61.682 | STM4367 | 100 |
| 3413411 | atgaataactct-  | STM3245 | 100 | STM2281 | 55     | STM3245 | 100 |
| 3310490 | atgagccagç-    | STM3147 | 100 | STM1538 | 73     | STM3147 | 100 |
| 2980213 | atgagcgtga+    | STM2834 | 100 | STM4363 | 64.078 | STM2834 | 100 |
| 2989977 | atggcgatag-    | STM2842 | 100 | STM3169 | 65.686 | STM2842 | 100 |
| 401324  | atgaacatcg+    | STM0354 | 100 | STM0499 | 59     | STM0354 | 100 |
| 2993884 | atgtttacctttæ- | STM2848 | 100 | STM2321 | 58     | STM2848 | 100 |
| 2326717 | atgtttactatc+  | STM2224 | 100 | STM0488 | 59.223 | STM2224 | 100 |
| 2194302 | atgcaggatc-    | STM2110 | 100 | STM3691 | 57.426 | STM2110 | 100 |
| 2298542 | atgtttaggttt-  | STM2199 | 100 | STM2777 | 71     | STM2199 | 100 |
| 1871261 | atgaaacaaç-    | STM1772 | 100 | STM3199 | 68.627 | STM1772 | 100 |
| 3256919 | atgccctgga+    | STM3094 | 100 | STM0963 | 64.706 | STM3094 | 100 |
| 783731  | atgcagacgt+    | STM0718 | 100 | STM2144 | 68.224 | STM0718 | 100 |
| 866454  | atgagtaaac+    | STM0798 | 100 | STM1385 | 51     | STM0798 | 100 |
| 929883  | atgaaaagta+    | STM0857 | 100 | STM1356 | 57     | STM0857 | 100 |
| 3487931 | atgaccgtaa+    | STM3324 | 100 | STM3541 | 56.311 | STM3324 | 100 |
| 3960519 | atgtctacacc+   | STM3761 | 100 | STM0950 | 85     | STM3761 | 100 |
| 906628  | gtgttagtttcc+  | STM0838 | 100 | STM3459 | 71.287 | STM0838 | 100 |
| 3516784 | atgaaaaaaç+    | STM3348 | 100 | STM0209 | 88     | STM3348 | 100 |
| 3430271 | atgtttagcga+   | STM3260 | 100 | STM1614 | 70.192 | STM3260 | 100 |
| 3356988 | atgcatctaa+    | STM3193 | 100 |         |        | STM3193 | 100 |
| 2365328 | atgaaaatga-    | STM2266 | 100 | STM2830 | 61.818 | STM2266 | 100 |
| 813431  | atgaataagtç+   | STM0744 | 100 | STM2440 | 75     | STM0744 | 100 |
| 3470087 | atgcbgattttcc+ | STM3300 | 100 | STM2339 | 61.321 | STM3300 | 100 |
| 3397103 | atgtcgaaag+    | STM3229 | 100 | STM2311 | 66     | STM3229 | 100 |
| 3836651 | atgtccggttaç+  | STM3649 | 100 | STM1837 | 81     | STM3649 | 100 |

|                       |         |        |         |                |       |
|-----------------------|---------|--------|---------|----------------|-------|
| 3233722 atgactgtatc + | STM3071 | 100    |         | STM3071        | 100   |
| 797583 gtgtcaccag +   | STM0731 | 100    | STM0898 | 60.185 STM0731 | 100   |
| 854772 atgtattcatc +  | STM0789 | 100    | STM0145 | 79.412 STM0789 | 100   |
| 812252 atgatcgatta +  | STM0741 | 100    | STM1793 | 83 STM0741     | 100   |
| 3922462 atgtcccag -   | STM3728 | 100    | STM0096 | 57.547 STM3728 | 100   |
| 3016056 atgtcgattgc - | STM2872 | 100    | STM1651 | 54.369 STM2872 | 100   |
| 1493671 atggattggg +  | STM1413 | 100    |         | STM1413        | 100   |
| 1921088 atgtttgcagg - | STM1823 | 100    | STM4238 | 57.282 STM1823 | 100   |
| 622046 atgttaaaagi +  | STM0565 | 100    | STM2368 | 60.194 STM0565 | 100   |
| 4376871 atgggttcgca + | STM4158 | 100    |         | STM4158        | 100   |
| 1475087 atgaataaca -  | STM1389 | 100    | STM3524 | 57.843 STM1389 | 100   |
| 3666703 atggcttcatt + | STM3507 | 100    | STM4491 | 76.699 STM3507 | 100   |
| 4362947 atgtctgaag +  | STM4148 | 100    |         | STM4148        | 100   |
| 4106393 gtggagagca -  | STM3897 | 100    | STM1625 | 72.549 STM3897 | 100   |
| 4186830 atgaaatttaa + | STM3980 | 100    | STM3191 | 63 STM3980     | 100   |
|                       | STM2712 | 100    | STM2713 | 100 STM2712    | 85.71 |
| 1678860 atgacgattcc + | STM1590 | 100    | STM4558 | 60.377 STM1590 | 99.41 |
| 119579 atgacgatttt -  | STM0102 | 100    | STM0145 | 61.386 STM0102 | 100   |
| 1539082 gcattaggcg -  | STM1465 | 100    | STM3225 | 63.366 STM1465 | 93.22 |
| 1333717 atgttcctcgc + | STM1248 | 100    |         | STM1248        | 100   |
| 3024368 atgaaaatca -  | STM2880 | 100    |         | STM2880        | 100   |
| 2945858 atgggtttctg - | STM2796 | 100    | STM2080 | 60.784 STM2796 | 100   |
| 133912 atgtcacatat -  | STM0114 | 100    | STM2915 | 34.483 STM0114 | 100   |
| 2849212 gtggcggata -  | STM2698 | 100    |         | STM2698        | 100   |
| 774124 gtgagtgcag -   | STM0707 | 100    |         | STM0707        | 100   |
| 1605873 atgccttctgt + | STM1528 | 100    | STM1529 | 100 STM1529    | 100   |
| 3997810 atgaacccttc - | STM3797 | 100    | STM0994 | 52.525 STM3797 | 100   |
| 3458265 atgattacag -  | STM3288 | 100    |         | STM3288        | 100   |
| 3463744 atgagtaatc -  | STM3294 | 100    | STM1484 | 64.423 STM3294 | 100   |
| 1112306 atgaatcttga + | STM1022 | 100    | STM1676 | 60.396 STM1022 | 100   |
| 1112690 atgcctgtgac + | STM1023 | 100    |         | STM1023        | 100   |
| 1026770 atgcaggccc -  | STM0947 | 100    | STM0242 | 60.377 STM0947 | 100   |
| 812798 atgaagtatal +  | STM0743 | 100    | STM3672 | 62.617 STM0743 | 100   |
| P60599 atgtataaatc -  | PSLT072 | 100    | PSLT072 | 58 PSLT072     | 100   |
| P93300 atgacgatgg +   | PSLT110 | 100    | STM1170 | 64.423 PSLT110 | 100   |
| P61394 atggctaaag +   | PSLT073 | 100    |         | PSLT073        | 100   |
| P07324 gtgacgatga -   | PSLT011 | 100    | STM3997 | 67 PSLT011     | 100   |
| P05549 atgaaaaaa -    | PSLT009 | 100    | STM1246 | 73 PSLT009     | 100   |
| P62273 atgtgtccgac +  | PSLT075 | 100    | STM0557 | 62 PSLT075     | 100   |
| 1958203 atgaaaatcg +  | STM1861 | 100    | STM1871 | 74 STM1861     | 100   |
|                       | STM0007 | 100    | STM2473 | 71 STM0007     | 100   |
| 2078765 atgaacaga +   | STM1995 | 100    | STM1572 | 85 STM1995     | 100   |
|                       | STM2097 | 100    | STM3922 | 79 STM2097     | 100   |
|                       | STM2204 | 100    | STM3858 | 76 STM2204     | 100   |
| 2311296 ctgccctcag +  | STM2211 | 100    | STM3576 | 62.037 STM2211 | 100   |
|                       | STM3152 | 100    | STM0998 | 74.757 STM3152 | 100   |
|                       | STM3216 | 100    | STM3152 | 73 STM3216     | 100   |
|                       | STM3241 | 100    | STM0973 | 79 STM3241     | 100   |
|                       | STM3348 | 100    | STM0209 | 71 STM3348     | 100   |
| 1132118 atgattaacg +  | STM1046 | 100    | STM0922 | 78 STM1046     | 100   |
|                       | STM2563 | 58.333 |         | STM2563        | 7.67  |

|         |        |         |        |         |       |
|---------|--------|---------|--------|---------|-------|
| STM1861 | 80     | STM1871 | 77     | STM1871 | 56.3  |
| PSLT075 | 61.765 | STM2085 | 49     | PSLT075 | 42.4  |
| STM2698 | 89     |         |        | STM2698 | 89.1  |
| STM0150 | 59.813 | STM2599 | 59.434 | STM2599 | 16.44 |
| STM1114 | 46.226 |         |        | STM1114 | 10.24 |
| STM3968 | 63.462 | STM0995 | 63.366 | STM3968 | 31.93 |
| STM3719 | 47.525 |         |        | STM3719 | 5.24  |
| STM2709 | 88     | STM3986 | 57.843 | STM2709 | 82.2  |
| STM2939 | 67.593 | STM0624 | 55.34  | STM2939 | 31.35 |
| STM0604 | 60.194 | STM3515 | 51.961 | STM0604 | 10.99 |
| STM2723 | 95     | STM0149 | 60.396 | STM2723 | 76.99 |
| STM2707 | 93     | STM4201 | 50     | STM2707 | 87.1  |
| STM2592 | 62.5   | STM0024 | 61.165 | STM0024 | 19.26 |
| STM1228 | 58.333 | STM4433 | 53     | STM1228 | 54.07 |
| STM2081 | 50.485 |         |        | STM2081 | 11.26 |
| STM2696 | 88     |         |        | STM2696 | 76.1  |
| STM2943 | 74.51  | STM2163 | 61     | STM2943 | 21.84 |
| STM2722 | 100    | STM2722 | 62.617 | STM2722 | 95.2  |
| STM2006 | 83     | STM2760 | 76     | STM2760 | 59.49 |
| STM0778 | 65.385 | STM0243 | 62.617 | STM0778 | 13.13 |
| STM2373 | 60.194 |         |        | STM2373 | 17.37 |
| STM1693 | 67     | STM1045 | 63.462 | STM1045 | 5.58  |
| STM4525 | 99     |         |        | STM4525 | 89.7  |
| STM2729 | 100    | STM4081 | 65.421 | STM2729 | 81.46 |
| STM0151 | 61.111 |         |        | STM0151 | 4.12  |
| STM2749 | 71     | STM3306 | 66     | STM2749 | 59.42 |

|                       |         |     |         |        |         |     |
|-----------------------|---------|-----|---------|--------|---------|-----|
| 4533709 atgcgttttcaç- | STM4291 | 100 | STM3178 | 77     | STM4291 | 100 |
| 4051053 atggcactttc+  | STM3844 | 100 | STM2740 | 62.376 | STM3844 | 100 |
| 4083787 atgttttatcag- | STM3874 | 100 | STM1216 | 69     | STM3874 | 100 |
| 3485843 atgaagcaaç+   | STM3320 | 100 |         |        | STM3320 | 100 |
| 3345854 atgacgcaaç-   | STM3181 | 100 | STM3835 | 80     | STM3181 | 100 |
| 3473089 atgtacgcgg-   | STM3304 | 100 | STM2432 | 61.386 | STM3304 | 100 |
| 73837 atgaacgtga+     | STM0063 | 100 | STM0619 | 68     | STM0063 | 100 |
| 157852 atgatcaaac+    | STM0134 | 100 | STM2776 | 59.406 | STM0134 | 100 |
| 196330 atgaagacgt-    | STM0167 | 100 | STM1452 | 59.406 | STM0167 | 100 |
| 216374 atgacaggçç-    | STM0185 | 100 | STM2222 | 62.5   | STM0185 | 100 |
| 260983 ttgctgaagta+   | STM0222 | 100 | STM2274 | 76.238 | STM0222 | 100 |
| 1584492 atgaaaagç+    | STM1506 | 100 | STM1041 | 65.094 | STM1506 | 100 |
| 3539740 gtgaggcgat-   | STM3369 | 100 | STM1300 | 64.078 | STM3369 | 100 |
| 694444 atgttcgittgç+  | STM0631 | 100 | STM0681 | 61.682 | STM0631 | 100 |
| 718905 atggataaag+    | STM0655 | 100 | STM0657 | 81     | STM0655 | 100 |
| 750940 atgcgtacgtt+   | STM0687 | 100 | STM2039 | 62.5   | STM0687 | 100 |
| 781113 atgaacattgç+   | STM0714 | 100 | STM2249 | 62.617 | STM0714 | 100 |

|                        |         |             |                |       |
|------------------------|---------|-------------|----------------|-------|
| 2511694 atgttcggttct - | STM2398 | 100         | STM2398        | 100   |
| 2183939 atgaaattatt:-  | STM2101 | 100 STM1956 | 60.194 STM2101 | 100   |
| 4831100 atgaaaaaaal-   | STM4575 | 100 STM4574 | 65 STM4575     | 100   |
| 322415 atgacagacæ +    | STM0282 | 100 PSLT082 | 69.307 STM0282 | 100   |
| 2897420 atgaaaagaa-    | STM2758 | 100 STM1203 | 73 STM2758     | 100   |
| 2927854 atggagcgttr-   | STM2780 | 100 STM1088 | 61.765 STM2780 | 100   |
| 1130586 atgaaataca -   | STM1044 | 100 STM0924 | 70.588 STM1044 | 100   |
| 313833 atgaaaactc +    | STM0272 | 100 STM2660 | 73.267 STM0272 | 100   |
| 2891090 atgaacacgç +   | STM2752 | 100 STM2833 | 73.267 STM2752 | 100   |
| 378934 atgaaattgai +   | STM0335 | 100 PSLT101 | 62.136 STM0335 | 100   |
| 1177325 atgccaataa -   | STM1088 | 100 STM2780 | 62 STM1088     | 100   |
| 3582390 atgtatcgcat -  | STM3412 | 100 STM0499 | 58.824 STM3412 | 100   |
| 3615337 atgcaagcgc -   | STM3465 | 100         | STM3465        | 100   |
| 1171957 atgactgaatr-   | STM1080 | 100 STM2385 | 61 STM1080     | 100   |
| 1581270 atgacaagtg -   | STM1502 | 100 STM3359 | 62.857 STM1502 | 100   |
| 3606905 atgaaagtag -   | STM3455 | 100 STM3791 | 59.223 STM3455 | 100   |
| 3646532 atggccttttaa:- | STM3492 | 100 STM1716 | 65.138 STM3492 | 100   |
| 1325635 atggaaaagc: +  | STM1238 | 100 STM3972 | 64 STM1238     | 100   |
| 1356982 atgattggtctç + | STM1279 | 100 STM3359 | 63.366 STM1279 | 100   |
| 3609016 atggaaggtgç -  | STM3457 | 100 STM0086 | 79.208 STM3457 | 100   |
| 1293632 gtgggcccacç +  | STM1209 | 100 STM3638 | 63.208 STM1209 | 100   |
| 1335983 atggcactca +   | STM1251 | 100 STM4492 | 62.5 STM1251   | 100   |
| 3728528 atgttatgctg -  | STM3559 | 100 STM0309 | 62.136 STM3559 | 100   |
| 4255909 atgcaaaaata -  | STM4045 | 100 STM3801 | 59 STM4045     | 100   |
| 4430534 atgtatgccgt -  | STM4210 | 100 STM1651 | 62.745 STM4210 | 100   |
| 4287071 atgatgaatrç +  | STM4076 | 100 STM3883 | 63 STM4076     | 100   |
| 4322444 atgaaattcgr-   | STM4107 | 100 STM0992 | 63.725 STM4107 | 100   |
| 3006186 atgcctggtac:-  | STM2860 | 100 STM2168 | 75.238 STM2860 | 100   |
| 3061627 atgacaacaçç -  | STM2918 | 100 STM3248 | 63 STM2918     | 100   |
| 2488524 atgccaacta -   | STM2377 | 100 STM2403 | 78 STM2377     | 100   |
| 2528747 atgccggata -   | STM2410 | 100 STM2503 | 70 STM2410     | 100   |
| 971582 atgctgcgcc +    | STM0900 | 100 STM4526 | 60.748 STM0900 | 100   |
| 2601094 atgtctgatatr-  | STM2485 | 100         | STM2485        | 100   |
| 1035114 atgaataaaa -   | STM0957 | 100 STM1226 | 66 STM0957     | 100   |
| 2737098 atgccagtag -   | STM0926 | 100 STM1049 | 100 STM2588    | 100   |
| 4291741 atgaagccaçç -  | STM4082 | 100         | STM4082        | 100   |
| 4446029 atgaaaaaaa: +  | STM4225 | 100 STM3222 | 61.538 STM4225 | 100   |
| 3057045 atgacaagttt -  | STM2913 | 100 STM3512 | 70 STM2913     | 100   |
| 3079457 gtgacgttcgt -  | STM2938 | 100 STM0712 | 89 STM2938     | 100   |
| 953070 ttgggatttata +  | STM0881 | 100 STM0056 | 53.465 STM0881 | 84.04 |
| 974219 atgaaactgg +    | STM0903 | 100 STM1022 | 58 STM0903     | 100   |
| 992760 atgaagcagç +    | STM0920 | 100 STM1043 | 74 STM0920     | 100   |
| 2659863 atgtctgaacç -  | STM2525 | 100         | STM2525        | 100   |
| 1446239 atggtaaatgl -  | STM1364 | 100 STM0790 | 60.396 STM1364 | 100   |
| 2031611 gtgaaaaaac: +  | STM1937 | 100 STM3279 | 64 STM1937     | 100   |
| 2076919 ttgagtaccaçç - | STM1994 | 100 STM0203 | 52.381 STM1994 | 100   |
| 4676709 atggcggaaçç +  | STM4432 | 100 STM0928 | 62.136 STM4432 | 100   |
| 4738761 atgcaaaccç -   | STM4491 | 100 STM0153 | 64.356 STM4491 | 100   |
| 4771955 atgaataaaa -   | STM4516 | 100         | STM4516        | 100   |
| 4755834 atgaatttatç -  | STM4501 | 100 STM4085 | 62.136 STM4501 | 100   |
| 2479604 atgagctgga -   | STM2366 | 100         | STM2366        | 100   |
| 1315984 atgttacgcat +  | STM1228 | 100         | STM1228        | 100   |

|                        |         |             |                |     |
|------------------------|---------|-------------|----------------|-----|
| 1415376 atggctcgcg +   | STM1336 | 100 STM0282 | 63.107 STM1336 | 100 |
| 2547169 atgggtttgttc + | STM2433 | 100 STM0685 | 71 STM2433     | 100 |
| 1356087 atgacgacaç -   | STM1278 | 100 STM2689 | 64.078 STM1278 | 100 |
| 1169739 atgaaaaccç -   | STM1077 | 100 PSLT068 | 63.366 STM1077 | 100 |
| 3011722 atgagaaatç -   | STM2866 | 100 STM0732 | 51.887 STM2866 | 100 |
| 2369977 atgagtcagtr +  | STM2269 | 100 STM1082 | 62.376 STM2269 | 100 |
| 2038250 gtgagtgaaz -   | STM1946 | 100 STM0984 | 55.769 STM1946 | 100 |
| 2090402 atgaaatttaa +  | STM2008 | 100 STM3577 | 59.804 STM2008 | 100 |
| 2363131 atgctggatct -  | STM2264 | 100 STM0793 | 59.804 STM2264 | 100 |
| 1396299 atgagccagç +   | STM1316 | 100         | STM1316        | 100 |
| 1441286 atggatgttac -  | STM1359 | 100 STM3859 | 57.843 STM1359 | 100 |
| 1525681 atgaagaata +   | STM1450 | 100 STM2435 | 59.406 STM1450 | 100 |
| 1559832 atggcaaaaç -   | STM1481 | 100 STM3582 | 78.218 STM1481 | 100 |
| 4454518 atgaaaatga +   | STM4232 | 100 STM1179 | 67 STM4232     | 100 |
| 4026372 atgctgcgcgç -  | STM3825 | 100 STM0060 | 55.14 STM3825  | 100 |
| 4006746 atgccggata -   | STM3804 | 100 STM3263 | 63.81 STM3804  | 100 |
| 255022 atggcaactg +    | STM0216 | 100 STM4082 | 66.667 STM0216 | 100 |
| 424652 atgacagacç -    | STM0372 | 100 STM3286 | 55.34 STM0372  | 100 |
| 155622 atgatcaagg +    | STM0132 | 100         | STM0132        | 100 |
| 2439039 atggattatac -  | STM2327 | 100 STM2847 | 72.115 STM2327 | 100 |
| 1818289 atgggagccç -   | STM1721 | 100 STM2594 | 63.107 STM1721 | 100 |
| 4043619 atgaaatttac -  | STM3837 | 100 STM0208 | 64.486 STM3837 | 100 |
| 1479598 atgaatttgct -  | STM1392 | 100 STM3826 | 64.356 STM1392 | 100 |
| 1550809 atgaaaagaç -   | STM1473 | 100 STM1995 | 88 STM1473     | 100 |
| 606017 atgctgaataç +   | STM0545 | 100 STM0022 | 77 STM0545     | 100 |
| 4057105 atggcgactc +   | STM3849 | 100 STM4445 | 67.961 STM3849 | 100 |
| 403142 atgtacaccç +    | STM0356 | 100 STM3338 | 70 STM0356     | 100 |
| 2785154 atggatctgcç -  | STM2644 | 100 STM0243 | 62.963 STM2644 | 100 |
| 3380805 atgatgcaaa +   | STM3215 | 100 STM0647 | 86 STM3215     | 100 |
| 3688130 atgttgatgati - | STM3524 | 100 STM3937 | 63.551 STM3524 | 100 |
| 4374601 atgctggataç +  | STM4155 | 100 STM2086 | 62.5 STM4155   | 100 |
| 1143252 atgttaagacç -  | STM1055 | 100 STM0031 | 63 STM1055     | 100 |
| 2770870 atgaaaaattr +  | STM1010 | 100 STM2631 | 100 STM2631    | 100 |
| 654927 atgaatcgac +    | STM0593 | 100 STM2179 | 62.376 STM0593 | 100 |
| 4623701 atgactgaag -   | STM4381 | 100 STM1661 | 62.617 STM4381 | 100 |
| 4721959 atggagttcaç -  | STM4477 | 100 STM2536 | 70.297 STM4477 | 100 |
| 2789826 atgaccaata +   | STM2650 | 100 STM2381 | 57 STM2650     | 100 |
| 3368302 atggctcagg -   | STM3202 | 100         | STM3202        | 100 |
| 3411365 atgagtactar -  | STM3243 | 100 STM2970 | 72 STM3243     | 100 |
| 3418139 atgaataacg -   | STM3249 | 100 STM2289 | 66 STM3249     | 100 |
| 2396843 atgaacgcat -   | STM2289 | 100 STM1106 | 72.277 STM2289 | 100 |
| 2610585 atgtcatcctg -  | STM2496 | 100 STM0285 | 52.885 STM2496 | 100 |
| 543815 atgcaaaccç +    | STM0486 | 100 STM3178 | 63.366 STM0486 | 100 |
| 527952 atgagtgcgç -    | STM0472 | 100 STM0226 | 61 STM0472     | 100 |
| 634283 atgaacgagç -    | STM0573 | 100 STM0588 | 65 STM0573     | 100 |
| 4217008 atgtccgctgç -  | STM4007 | 100 STM3342 | 61.765 STM4007 | 100 |
| 914684 atgatctcaa -    | STM0844 | 100 STM4115 | 69 STM0844     | 100 |
| 807077 atgaacttacç +   | STM0738 | 100 STM2523 | 60.577 STM0738 | 100 |
| 4215324 atggcaagcç -   | STM4006 | 100 STM4589 | 50.495 STM4006 | 100 |
| 2465273 atgaaaaaaç -   | STM2354 | 100 STM2355 | 85 STM2354     | 100 |
| 139341 gtgaaactgg +    | STM0118 | 100 STM3178 | 66.019 STM0118 | 100 |
| 757658 atggcaatca -    | STM0694 | 100 STM3045 | 64.078 STM0694 | 100 |



|                        |         |     |         |        |         |       |
|------------------------|---------|-----|---------|--------|---------|-------|
| 801221 atgatgaaac +    | STM0735 | 100 | STM4342 | 73     | STM0735 | 100   |
| 267783 gtgattgataa +   | STM0228 | 100 | STM0226 | 59.223 | STM0228 | 100   |
| 2816028 gtgtttattggc - | STM2674 | 100 | STM3807 | 56.863 | STM2674 | 100   |
| 4604883 atggctaagg +   | STM4361 | 100 |         |        | STM4361 | 100   |
| 1875710 atgaccctttt -  | STM1777 | 100 |         |        | STM1777 | 100   |
| 2614748 atgaatattgt +  | STM2500 | 100 | STM1756 | 59.406 | STM2500 | 100   |
| 916952 atgttcattgga -  | STM0846 | 100 | STM1305 | 59.259 | STM0846 | 100   |
| 1328977 atgaataaaa -   | STM1240 | 100 | STM0482 | 59.406 | STM1240 | 100   |
| 4273292 atgattaaga +   | STM4062 | 100 | STM1064 | 70.297 | STM4062 | 100   |
| 728749 atgtcaatag -    | STM0664 | 100 | STM0663 | 69     | STM0664 | 100   |
| 3573036 atgtctgacac +  | STM3399 | 100 | STM2114 | 76     | STM3399 | 100   |
| 1691213 atggctatga -   | STM1600 | 100 | STM0762 | 51.485 | STM1600 | 100   |
| 2775284 atgcccctaa +   | STM1007 | 100 | STM2634 | 100    | STM2634 | 100   |
| 2124925 atgaacggc +    | STM2048 | 100 | STM2125 | 64.762 | STM2048 | 100   |
| 4528760 atgttcgcagc -  | STM4286 | 100 | STM3583 | 51.887 | STM4286 | 100   |
| 2039591 atgagtacgc +   | STM1949 | 100 | STM0160 | 53.398 | STM1949 | 100   |
|                        | STM4261 | 100 | STM0351 | 53.333 | STM4261 | 100   |
| 3525940 gtgcagaag -    | STM3357 | 100 | STM2794 | 69     | STM3357 | 100   |
| 10805 atgaacgtca -     | STM0010 | 100 | STM2255 | 63.81  | STM0010 | 100   |
| 3730 atggtgaaag +      | STM0003 | 100 | STM1588 | 63.107 | STM0003 | 100   |
| 1409764 atggatacac +   | STM1331 | 100 | STM1005 | 61.386 | STM1331 | 100   |
| 1968238 ctgataacag -   | STM1872 | 100 | STM1392 | 47.17  | STM1872 | 100   |
| 3435369 atggtaacct +   | STM3264 | 100 | STM3610 | 66.364 | STM3264 | 99.85 |
| 2585793 atgaaaataa -   | STM2475 | 100 | STM2204 | 63.551 | STM2475 | 100   |
| 986134 atgattcactc -   | STM0913 | 100 | STM1034 | 74     | STM0913 | 90.32 |
| 2284948 atgagtgcggt -  | STM2188 | 100 | STM3883 | 59.804 | STM2188 | 100   |
| 629163 atgacccaa +     | STM0570 | 100 |         |        | STM0570 | 100   |
| 225927 atggcgcgctc +   | STM0191 | 100 | STM0364 | 88     | STM0191 | 100   |
|                        | STM4261 | 100 | STM2353 | 60     | STM4261 | 100   |
| 2436485 atgcacgag -    | STM2325 | 100 | STM3341 | 63.81  | STM2325 | 100   |
| 3165359 atgaaaaagi +   | STM3007 | 100 | STM2983 | 67     | STM3007 | 100   |
| 4193634 atggacagtt +   | STM3985 | 100 | STM4495 | 57.843 | STM3985 | 100   |
| 4165749 atgaccttga -   | STM3960 | 100 | STM1270 | 61.765 | STM3960 | 100   |
| 4143121 atgatgctaa -   | STM3935 | 100 | STM0910 | 65.094 | STM3935 | 100   |
| 4364241 atggctaaac +   | STM4150 | 100 |         |        | STM4150 | 100   |
| 4131679 atgagttttac +  | STM3921 | 100 | STM0493 | 63.208 | STM3921 | 100   |
| 4357700 atgaccact +    | STM4137 | 100 | STM0889 | 59.633 | STM4137 | 100   |
| 2061279 atgaccacgc +   | STM1972 | 100 | STM1415 | 67.327 | STM1972 | 100   |
| 2544843 atgtccagca +   | STM2431 | 100 | STM1914 | 64     | STM2431 | 100   |
| 122485 atggctgaaa +    | STM0104 | 100 |         |        | STM0104 | 100   |
| 3098662 atgtccaaaa -   | STM2952 | 100 | STM4285 | 57.426 | STM2952 | 100   |
| 4293123 atggccgatt -   | STM4084 | 100 | STM1048 | 63.462 | STM4084 | 100   |
| 2155388 atgattattcc +  | STM2076 | 100 | STM2511 | 61.765 | STM2076 | 100   |
| 4136045 atgtcgcttgc +  | STM3926 | 100 | STM3239 | 65.049 | STM3926 | 100   |
| 4384104 atggatcgtat +  | STM4166 | 100 | STM0255 | 63.889 | STM4166 | 100   |
| 434637 atggcgaaat -    | STM0380 | 100 | STM0875 | 68     | STM0380 | 100   |
| 2019193 gtgagcatgg -   | STM1921 | 100 | STM4304 | 63.725 | STM1921 | 100   |
| 1896782 atgatacccc +   | STM1796 | 100 | STM3603 | 78     | STM1796 | 100   |
| 1714602 atggcgaac -    | STM1624 | 100 |         |        | STM1624 | 100   |
| 1753405 atgaaccttg -   | STM1658 | 100 | STM3772 | 88     | STM1658 | 100   |
| 958666 atgaaaaagi -    | STM0887 | 100 | STM0890 | 76     | STM0887 | 100   |
| 683302 atgatgccga -    | STM0619 | 100 | STM0063 | 68     | STM0619 | 100   |

|                        |         |             |                |       |
|------------------------|---------|-------------|----------------|-------|
| 1077270 atgctttttacg - | STM0990 | 100         | STM0990        | 100   |
| 3967578 atgaaaaaaa:-   | STM3766 | 100 STM3508 | 84 STM3766     | 100   |
| 664764 atgaaccac:-     | STM0602 | 100 STM4108 | 67.961 STM0602 | 100   |
| 1816679 atgagcga:-     | STM1719 | 100 STM2222 | 61 STM1719     | 100   |
| 1653489 atggacgtca -   | STM1570 | 100 STM4037 | 93 STM1570     | 100   |
| 1920428 gtgacggac:-    | STM1821 | 100 STM2323 | 62.136 STM1821 | 100   |
| 1948497 atgcacatga +   | STM1849 | 100 STM1703 | 68.519 STM1849 | 100   |
| 1967008 gtggaacag: +   | STM1870 | 100 STM1009 | 75.728 STM1870 | 100   |
| 1993226 atgaaaaaa: +   | STM1897 | 100 PSLT110 | 68.317 STM1897 | 100   |
| 540089 atgcaacgta +    | STM0482 | 100 STM0410 | 61.905 STM0482 | 100   |
| 586676 atgttccctgtt +  | STM0524 | 100 STM2851 | 60.577 STM0524 | 100   |
| 616456 atgagaaga:-     | STM0557 | 100 STM4204 | 66.667 STM0557 | 100   |
| 1658993 atgagttacct +  | STM1575 | 100 STM0692 | 63.303 STM1575 | 100   |
| 3278150 atgatgaatgl -  | STM3118 | 100 STM2238 | 65.049 STM3118 | 100   |
| 2396034 atgccggatg -   | STM2288 | 100 STM2293 | 96 STM2288     | 99.44 |
| 2921226 atgcccgcg: +   | STM2774 | 100 STM2219 | 68.627 STM2774 | 100   |
| 3841839 atgtctgaga:-   | STM3655 | 100 STM3301 | 64.078 STM3655 | 100   |
| 815840 gtgtcaagg +     | STM0747 | 100 STM0450 | 67.647 STM0747 | 100   |
| 4326954 ctacggggcg: +  | STM4110 | 100 STM4111 | 100 STM4110    | 100   |
| 3340182 atgaatgacc -   | STM3175 | 100         | STM3175        | 99.66 |
| 3173957 atgtcattgcc -  | STM3013 | 100         | STM3013        | 100   |
| 3240439 atgagcacct -   | STM3078 | 100         | STM3078        | 100   |
| 493272 gtggatattcc +   | STM0438 | 100 STM0437 | 67 STM0438     | 100   |
| 2990668 atgaaccgttt -  | STM2843 | 100 STM3666 | 72 STM2843     | 100   |
| 3830351 atgattcgca: +  | STM3643 | 100 STM3274 | 83.168 STM3643 | 100   |
| 3971263 atggatacctt -  | STM3770 | 100 STM2511 | 62.264 STM3770 | 100   |
| 3156811 gtgaatcggg -   | STM2998 | 100 STM2915 | 60.577 STM2998 | 100   |
| 3193055 atgaaaagc:-    | STM3030 | 100 STM0339 | 58.559 STM3030 | 100   |
| 3276040 gtggtaattgg +  | STM3115 | 100 STM2179 | 73.077 STM3115 | 100   |
| 3308300 atgtctgaaa:-   | STM3145 | 100         | STM3145        | 100   |
| 2863892 atgacagtga -   | STM2721 | 100         | STM2721        | 100   |
| 2258909 atgattgaattl - | STM2163 | 100 STM1491 | 77 STM2163     | 100   |
| 1917693 atggcggttc:-   | STM1819 | 100 STM1515 | 52.83 STM1819  | 100   |
| 3590699 atggcgaaa:-    | STM3428 | 100 STM3842 | 65.714 STM3428 | 100   |
| 3720417 atgaaagggttl + | STM3550 | 100 STM1041 | 63 STM3550     | 100   |
| 3466624 atggcgaaa:-    | STM3296 | 100 STM4543 | 51 STM3296     | 100   |
| 3373827 atgctgtact -   | STM3208 | 100 STM0214 | 66.337 STM3208 | 100   |
| 3718361 atgaacaata +   | STM3548 | 100 STM1381 | 77 STM3548     | 100   |
| 3477581 atgtttaaaccg - | STM3310 | 100 STM0998 | 59.048 STM3310 | 100   |
| 4761825 atgaaatcaa +   | STM4507 | 100 STM0994 | 64.762 STM4507 | 100   |
| 4569085 atggctcaac -   | STM4323 | 100 STM2817 | 62.136 STM4323 | 100   |
| 428810 atgttatctta: +  | STM0374 | 100         | STM0374        | 100   |
| 2238543 atgaaagca: +   | STM2143 | 100 STM2323 | 60.784 STM2143 | 100   |
| 2981439 atggtttccac +  | STM2836 | 100 STM2316 | 60.952 STM2836 | 100   |
| 2251772 atgactcaag +   | STM2155 | 100 STM0537 | 68 STM2155     | 96.17 |
| 2323673 gtgaccacc -    | STM2221 | 100 STM3847 | 79 STM2221     | 100   |
| 2345217 atgcctacaa +   | STM2244 | 100 STM0926 | 97 STM0926     | 42.1  |
| 2266472 atgctgaaatt -  | STM2168 | 100         | STM2168        | 100   |
| 299867 atgacaacg: +    | STM0259 | 100 STM0600 | 61.682 STM0259 | 100   |
| 1490020 atgtttgcggg +  | STM1407 | 100 STM0925 | 56.731 STM1407 | 100   |
| 798722 atggtaagca +    | STM0733 | 100 STM4323 | 62.037 STM0733 | 100   |
| 876147 atgaacctga +    | STM0810 | 100 STM0603 | 31 STM0810     | 100   |

|                       |         |     |         |                |       |
|-----------------------|---------|-----|---------|----------------|-------|
| 2819520 atgcccgtttt + | STM2678 | 100 |         | STM2678        | 91.45 |
| 3439048 atgctgatgg +  | STM3271 | 100 | STM2993 | 65.741 STM3271 | 87.6  |
| 3396243 atgcttaaacc + | STM3227 | 100 |         | STM3227        | 100   |
| 923438 atgcgattattt + | STM0851 | 100 | STM3628 | 74 STM0851     | 100   |
| 1471185 atgtggacgg -  | STM1385 | 100 | STM0612 | 67.961 STM1385 | 100   |
| 3399484 atgggacaac +  | STM3233 | 100 | STM2107 | 52.336 STM3233 | 100   |
| 3318065 atgcttcctga + | STM3155 | 100 | STM4040 | 58.716 STM3155 | 100   |
| 3205955 atgaacatgg +  | STM3045 | 100 | STM0694 | 64 STM3045     | 90.16 |
| 824824 atgaattatca +  | STM0760 | 100 | STM1347 | 83 STM0760     | 100   |
| 1267129 atgtccagctt + | STM1183 | 100 | STM3577 | 68 STM1183     | 100   |
| 2012272 atgatgcaac -  | STM1915 | 100 | STM4247 | 58 STM1915     | 100   |
| 3290456 atgagcgacc +  | STM3129 | 100 | STM1597 | 70 STM3129     | 100   |
| 1200516 atggcgaaa +   | STM1113 | 100 | STM0055 | 63 STM1113     | 100   |
| 817815 atgcaactga +   | STM0749 | 100 |         | STM0749        | 100   |
| 863103 atggcgacc +    | STM0796 | 100 | STM4429 | 84 STM0796     | 100   |
| 661092 atgatctgga +   | STM0599 | 100 | STM1366 | 72 STM0599     | 100   |
| 2677848 atgggactca -  | STM2537 | 100 |         | STM2537        | 100   |
| 2596760 atggcgaattt + | STM2481 | 100 | STM0475 | 88 STM2481     | 100   |
| 2971136 atgctgattct - | STM2826 | 100 | STM0152 | 60.377 STM2826 | 100   |
| 1124398 atgaccggac +  | STM1037 | 100 | STM2598 | 69 STM1037     | 100   |
| 4438335 atgcgcaact +  | STM4219 | 100 | STM1324 | 90 STM4219     | 100   |
| 3934051 atggcacgac +  | STM3741 | 100 | STM2513 | 60.377 STM3741 | 100   |
| 3878552 atgaaagca +   | STM3686 | 100 | STM2039 | 60.194 STM3686 | 98.71 |
| 4472639 atggcgctat -  | STM4252 | 100 | STM2468 | 61.765 STM4252 | 100   |
| 4429581 atgcgctacc -  | STM4209 | 100 |         | STM4209        | 100   |
| 2233451 atgaatgtca -  | STM2139 | 100 | STM3799 | 59.434 STM2139 | 94.92 |
| 2874411 atggctattga - | STM2733 | 100 | STM0551 | 57.692 STM2733 | 100   |
| 3804419 atgtataaca -  | STM3621 | 100 |         | STM3621        | 100   |
| 314475 atggctatca +   | STM0273 | 100 | STM4538 | 87 STM0273     | 100   |
| 1431829 atgagtgttac - | STM1350 | 100 | STM0596 | 67.327 STM1350 | 100   |
| 620112 atggatgcmc -   | STM0563 | 100 | STM0646 | 64.762 STM0563 | 99.64 |
| 1444663 atgatgaacg -  | STM1362 | 100 | STM4482 | 61.468 STM1362 | 100   |
| 1644668 atgacaatcc -  | STM1563 | 100 | STM4469 | 62 STM1563     | 100   |
| 52864 ttgcagcact +    | STM0044 | 100 | STM2458 | 47.525 STM0044 | 100   |
| 4033258 atgacagctc -  | STM3829 | 100 | STM2833 | 65.049 STM3829 | 100   |
| 4019996 atgaaaaaa -   | STM3820 | 100 |         | STM3820        | 100   |
| 116601 ttgaacgtcgc +  | STM0099 | 100 | STM3639 | 85 STM0099     | 100   |
| 1893187 atgtgtattta + | STM1794 | 100 |         | STM1794        | 100   |
| 2681509 atggcttaca -  | STM2542 | 100 |         | STM2542        | 100   |
| 3436334 gtgctcgaaa +  | STM3266 | 100 | STM0310 | 62.5 STM3266   | 100   |
| 2755602 atggcaaca -   | STM2607 | 100 | STM3555 | 64.151 STM2607 | 100   |
| 947463 gtgaaaattg +   | STM0875 | 100 | STM0865 | 64.486 STM0875 | 100   |
| 1022023 atggaaacgc -  | STM0943 | 100 | STM1996 | 70 STM0943     | 100   |
| 1099813 atgagcaac -   | STM1006 | 100 | STM0894 | 65 STM1006     | 100   |
| 872887 atgcgcatga +   | STM0805 | 100 |         | STM0805        | 100   |
| P67737 atgagcgatg +   | PSLT085 | 100 | STM2867 | 59.804 PSLT085 | 100   |
| P16377 ttgccgatcac +  | PSLT021 | 100 | PSLT022 | 100 PSLT021    | 100   |
| P74170 atgcacagg +    | PSLT094 | 100 | STM3488 | 65.741 PSLT094 | 100   |
| P63324 atgtcgggag +   | PSLT078 | 100 | STM4412 | 63 PSLT078     | 100   |
| P10940 gtgaataaga -   | PSLT016 | 100 | STM3027 | 68.317 PSLT016 | 100   |
| P10233 atgatgagac -   | PSLT015 | 100 | STM2240 | 50 PSLT015     | 100   |
| P54919 atggcagcac +   | PSLT066 | 100 | STM1049 | 61.165 PSLT066 | 100   |

|                     |         |     |         |        |         |     |
|---------------------|---------|-----|---------|--------|---------|-----|
|                     | STM1951 | 100 | STM0891 | 71     | STM1951 | 100 |
|                     | STM0061 | 100 | STM0621 | 78     | STM0061 | 100 |
|                     | STM0209 | 100 | STM3348 | 70     | STM0209 | 100 |
| 294336 ctaagcgtac + | STM0252 | 100 | STM2657 | 100    | STM0252 | 100 |
| 337835 gtgcagcagc + | STM0292 | 100 | STM0452 | 55.882 | STM0292 | 100 |
|                     | STM0979 | 100 | STM3077 | 72     | STM0979 | 100 |
|                     | STM1031 | 100 | STM0910 | 79     | STM1031 | 100 |
|                     | STM1033 | 100 | STM0912 | 80     | STM1033 | 100 |
|                     | STM1040 | 100 | STM2595 | 60.396 | STM1040 | 100 |

|  |         |        |         |        |         |       |
|--|---------|--------|---------|--------|---------|-------|
|  | STM2941 | 61.165 | STM1821 | 61.111 | STM3462 | 13.51 |
|  | STM2736 | 85     | STM0193 | 64.423 | STM2736 | 80.2  |
|  | STM4155 | 61     | STM2761 | 60.784 | STM4155 | 8.75  |
|  | STM3259 | 33.663 |         |        | STM3259 | 9.05  |

|                     |         |        |         |        |         |       |
|---------------------|---------|--------|---------|--------|---------|-------|
|                     | STM3295 | 64.762 | STM3668 | 60     | STM3668 | 19.69 |
|                     | STM1959 | 100    | STM2771 | 100    | STM2771 | 73.3  |
|                     | STM1474 | 42.574 | STM4261 | 35.294 | STM1474 | 8.57  |
|                     | STM2700 | 95     |         |        | STM2700 | 89    |
|                     | STM1289 | 61.538 | STM0886 | 56.881 | STM0886 | 14.86 |
|                     | STM4219 | 63.208 |         |        | STM4219 | 30.55 |
|                     | STM4218 | 69     |         |        | STM4218 | 31.55 |
|                     | STM0339 | 41.414 | STM1533 | 41.414 | STM1533 | 41.01 |
|                     | STM2951 | 42     | STM3789 | 38     | STM2951 | 22.23 |
|                     | STM2941 | 75     |         |        | STM2941 | 61.56 |
|                     | STM4037 | 56.436 | STM0074 | 55     | STM0074 | 12.92 |
|                     | STM4291 | 60.952 | STM2141 | 40     | STM4291 | 2.75  |
|                     | STM2519 | 61.165 | STM4551 | 60.952 | STM2519 | 6.65  |
|                     | STM4299 | 65.714 | STM3042 | 63.107 | STM4247 | 25.17 |
| 3880011 atgaaagaa + | STM3689 | 99     | STM0322 | 57.944 | STM3689 | 97.2  |
|                     | STM3460 | 99     | STM1463 | 60     | STM3460 | 94.62 |
|                     | STM1298 | 74     | STM0786 | 60     | STM1298 | 14.58 |
|                     | STM1557 | 43.564 |         |        | STM1557 | 16.07 |
|                     | STM2761 | 61.111 | STM0376 | 46.667 | STM2761 | 18.47 |
|                     | STM0333 | 53.774 | STM3079 | 53     | STM0333 | 14.83 |
|                     | STM2760 | 59     |         |        | STM2760 | 40.61 |
|                     | STM3635 | 100    | STM1749 | 62.264 | STM3635 | 50.07 |
|                     | STM3190 | 65.094 | STM2068 | 59.223 | STM3190 | 6.78  |
|                     | STM1298 | 60.784 | STM0547 | 53.398 | STM1298 | 17.29 |
|                     | STM1008 | 60.377 | STM2633 | 60.377 | STM1008 | 9.26  |

| 2ND_BEST%ID | (2) PRIMARY | (3) SECOND | (4) SINGLE GENE_ST | GENE_EN | GENE    | Description |              |
|-------------|-------------|------------|--------------------|---------|---------|-------------|--------------|
|             |             | STY2176    |                    | 2019614 | 2019928 | fliE        | flagellar_hc |
| STM0168     | 15.6        | STY3349    |                    | 3191970 | 3193382 | sufI        | SufI_protei  |
| STM0713     | 11.62       | STY2224    |                    | 2058754 | 2059431 | cbiQ        | putative_cc  |
| STM0492     | 18.76       | STY0101    |                    | 98592   | 100454  | kefC        | glutathione  |
| STM2511     | 23.49       | STY0163    |                    | 167200  | 168243  | guaC        | GMP_redu     |
| STM2252     | 7.88        | STY0148    |                    | 151371  | 152438  | murG        | UDP-N-ace    |
| STM0651     | 61.57       | STY0183    |                    | 192388  | 193341  | kdgT        | 2-keto-3-de  |
| STM0281     | 15.39       | STY0208    |                    | 217806  | 218285  | folK        | 2-amino-4-   |
| STM2323     | 10.57       | STY0238    |                    | 249937  | 250731  | map         | methionine   |
| STM0511     | 40.95       | STY0274    |                    | 285321  | 286352  | abc         | putative_Al  |
| STM3744     | 13.27       |            | STY1531            | 1486099 | 1486869 |             | putative_A   |
| STM1203     | 24.67       | STY0723    |                    | 721238  | 723190  | nagE        | pts_system   |
|             |             | STY0751    |                    | 753589  | 754332  |             | conserved_   |
| STM3763     | 29.53       | STY4796    |                    | 4655766 | 4658474 | mgtA        | Mg(2+)_tra   |
| STM4275     | 9.42        | STY2237    |                    | 2066412 | 2067551 | cbiD        | CbiD_prote   |
| PSLT055     | 45.91       | STY2206    |                    | 2044752 | 2045171 | umuD        | UmuD_pro     |
| STM1115     | 8.92        | STY1010    |                    | 1007350 | 1008552 | pncB        | nicotinate_  |
| STM3373     | 4.49        | STY3938    |                    | 3802080 | 3803726 | yidC        | putative_m   |
|             |             | STY3911    |                    | 3771246 | 3772787 | atpA        | ATP_synth    |
|             |             | STY0059    |                    | 58943   | 60145   |             | hypothetica  |
|             |             |            | STY0113            | 115278  | 117713  |             |              |
| STM0525     | 10.83       | STY3514    |                    | 3357600 | 3358880 | codA        | cytosine_di  |
| STM1185     | 44.08       | STY3550    |                    | 3393449 | 3394918 | rnG         | ribonucleas  |
| STM4477     | 34.52       | STY1130    |                    | 1095652 | 1096164 | hpaC        | 4-hydroxyp   |
| STM0557     | 10.3        | STY1167    |                    | 1129554 | 1130708 |             | conserved_   |
| STM4127     | 14.28       | STY1206    |                    | 1163401 | 1164048 |             | conserved_   |
| STM0760     | 21          | STY4286    |                    | 4161200 | 4161883 |             | putative_cc  |
| STM1469     | 10.35       |            |                    |         |         |             |              |
| STM2677     | 13.69       | STY4240    |                    | 4105776 | 4107251 | ftsY        | cell_divisio |
| STM3647     | 16.23       |            |                    |         |         |             |              |
| STM1057     | 3.24        | STY4281    |                    | 4150971 | 4153676 | malT        | MalT_regu    |
| STM3514     | 29.07       | STY4276    |                    | 4144568 | 4147015 | glgP        | glycogen_p   |
| STM3006     | 32.63       | STY4238    |                    | 4104795 | 4105067 |             | putative_m   |
|             |             | STY4919    |                    | 4778898 | 4780220 | deoA        | thymidine_   |
| STM0977     | 7.09        |            | STY4628            | 4494964 | 4496010 |             | probable_c   |
| STM4228     | 29.11       | STY4255    |                    | 4119439 | 4120326 | ugpA        | glycerol-3-p |
| STM2270     | 8.12        | STY4900    |                    | 4762682 | 4763407 |             | conserved_   |
| STM2131     | 46.94       | STY4935    |                    | 4795846 | 4796535 | creB        | putative_tv  |
| STM3280     | 14.11       | STY4644    |                    | 4505609 | 4506241 | cl          | phage_rep    |
| STM4386     | 19.41       |            |                    |         |         |             |              |

|         |       |          |         |         |      |                     |
|---------|-------|----------|---------|---------|------|---------------------|
| STM1063 | 15.23 | STY2893  | 2775687 | 2776604 | iroE | putative_e          |
| STM3575 | 7.25  | STY3766  | 3630256 | 3631380 |      | hypothetica         |
| STM2829 | 6.29  | STY2980  | 2855409 | 2856377 | hypE | hydrogena           |
| STM1033 | 9.38  | STY3052  | 2918049 | 2918810 | surE | stationary- $\zeta$ |
| STM2957 | 23.04 | STY0915  | 907526  | 908653  | ybjF | hypothetica         |
| STM0750 | 20.96 |          |         |         |      |                     |
| STM3478 | 9.69  | STY2727  | 2564354 | 2565232 | dapA | dihydrodipi         |
| STM0731 | 18.58 |          |         |         |      |                     |
| STM3331 | 47.53 |          |         |         |      |                     |
| STM0954 | 27.05 |          |         |         |      |                     |
| STM0261 | 2.65  | STY0984  | 978645  | 980909  | ycal | putative_cc         |
| STM0911 | 41.11 |          |         |         |      |                     |
| STM1692 | 6.33  | STY3793  | 3657306 | 3658328 |      | putative_Al         |
| STM3042 | 2.52  | STY3754  | 3613296 | 3615947 | ppc  | phosphoen           |
| PSLT010 | 15.32 | STY4511  | 4403286 | 4404191 |      | putative_m          |
| STM1222 | 22.11 | STY0910  | 902798  | 903910  | potF | putrescine-         |
| STM1031 | 68.47 |          |         |         |      |                     |
| STM0738 | 9.41  | STY2768  | 2620506 | 2621624 | gcpE | GcpE_prot           |
| STM2483 | 17.7  | STY2799  | 2654421 | 2655059 |      | putative_e          |
| STM1952 | 8.29  | STY0960  | 952706  | 954049  | ycaJ | conserevd_          |
| STM2420 | 12.06 | STY2821  | 2684813 | 2685724 |      | putative_tr         |
| STM2481 | 7.04  | STY2200  | 2037938 | 2039368 | dcm  | DNA-cytosi          |
| STM2146 | 16.02 | STY2495  | 2326944 | 2327594 | rcsB | regulator_c         |
| STM3282 | 8.3   | STY4870  | 4731750 | 4732421 |      | putative_m          |
| STM2493 | 21.42 | STY1142  | 1105511 | 1106407 | hpaA | 4-hydroxyp          |
| STM0685 | 10.03 | STY2576  | 2413430 | 2413984 |      | conserved_          |
| STM2248 | 13.03 | STY2164  | 2008974 | 2009693 | fliA | RNA_polyn           |
| STM0964 | 8.19  |          |         |         |      |                     |
| STM2221 | 12.97 | STY1204  | 1161336 | 1162544 |      | putative_m          |
| STM1320 | 41.51 | STY1755  | 1674560 | 1675906 |      | putative_tr         |
| STM3188 | 25.1  | STY4732  | 4593908 | 4595071 | yjfC | conserved_          |
| STM3319 | 32.86 | STY2984  | 2860176 | 2860997 | sitB | Iron_transp         |
| STM3342 | 16.49 | STY1671  | 1600615 | 1601220 | gst  | glutathione         |
|         |       | STY2195  | 2035229 | 2035474 |      | conserved_          |
| STM1379 | 12.86 | STY2277  | 2102617 | 2103981 | yeeF | putative_ar         |
| STM2288 | 13.87 | aSTY2523 |         |         |      |                     |
|         |       | STY2558  | 2394080 | 2394523 | nuoA | NADH_def            |
| STM1690 | 36.86 | STY4779  | 4640018 | 4640356 |      | hypothetica         |
| STM3844 | 50.3  |          |         |         |      |                     |
| STM2466 | 8.54  | STY4861  | 4724051 | 4724716 |      | hypothetica         |
| STM3646 | 13.26 | STY2601  | 2437375 | 2438511 | pdxB | erythronate         |
| STM0463 | 8.97  | STY1863  | 1771432 | 1772244 |      | putative_in         |
| STM2816 | 6.07  | STY1589  | 1535717 | 1537246 | pntA | pyridine_nu         |
| STM1752 | 8.94  | STY0361  | 370276  | 371733  | pepD | aminoacyl-          |
| STM2919 | 43.22 | STY0186  | 195592  | 196359  |      | putative_tr         |
| STM1971 | 8.75  | STY0236  | 246298  | 247122  | dapD | 2,3,4,5-tetr        |
|         |       | STY0150  | 154025  | 154945  | ddlB | D-alanine:L         |
| STM3468 | 64.56 | STY1811  | 1729833 | 1731059 | astC | succinylorn         |
| STM3280 | 3.63  | STY1772  | 1693623 | 1696010 | pheT | phenylalan          |
| STM0075 | 49.16 |          |         |         |      |                     |
| STM1684 | 15.15 | STY2375  | 2205844 | 2206644 | thiD | phosphome           |
| STM4058 | 12.5  | STY1651  | 1579435 | 1580739 | rstB | two_compc           |

|         |       |          |          |         |         |      |               |
|---------|-------|----------|----------|---------|---------|------|---------------|
|         |       | STY1702  |          | 1628054 | 1629022 | ssaQ | putative_ty   |
| STM3660 | 8.56  | STY3915  |          | 3775779 | 3776477 |      | putative_m    |
| STM0183 | 5.57  | STY0304  |          | 316373  | 317716  |      | conserved_    |
| STM3172 | 14.3  | STY0242  |          | 254032  | 254589  | frr  | ribosome_l    |
| STM1409 | 11.75 | STY2190  |          | 2031045 | 2031668 | rcaA | colanic_aci   |
| STM2073 | 11.5  | STY2642  |          | 2476613 | 2477851 |      | putative_ar   |
| STM2318 | 15.99 | STY2547  |          | 2380843 | 2382372 | nuoM | NADH_def      |
| STM4343 | 3.65  | STY1761  |          | 1682538 | 1684916 | ppsA | phosphoen     |
| STM1409 | 22.42 | STY2992  |          | 2867010 | 2867768 | prgK | pathogenic    |
| STM2442 | 49.82 | STY2680  |          | 2514808 | 2515641 | cysU | sulphate_tr   |
| STM2213 | 8.71  | STY0549  |          | 556374  | 557153  |      | putative_m    |
| STM2648 | 14.82 | STY3878  |          | 3734345 | 3734860 | yihI | conserved_    |
| STM4524 | 4.53  | STY4708  |          | 4569160 | 4570128 | psd  | phosphatid    |
| STM2697 | 29.34 |          |          |         |         |      |               |
| STM1467 | 32.37 | STY3362  |          | 3204817 | 3205239 |      | conserved_    |
| STM4228 | 10.88 | STY4256  |          | 4120323 | 4121168 | ugpE | sn-Glycero    |
| STM1428 | 5.12  | STY3470  |          | 3314668 | 3316077 | argG | argininosuc   |
| STM3140 | 29.7  | STY2579  |          | 2415435 | 2416082 |      | putative_gl   |
| STM0246 | 51.18 | STY0560  |          | 566212  | 566871  | sfbC | ABC_trans     |
| STM0960 | 13.3  | STY4752  |          | 4608620 | 4609255 | ytfB | conserved_    |
| STM3543 | 55.08 | STY4819  |          | 4680830 | 4681828 |      | regulatory_   |
| STM1584 | 41.62 | STY2913  |          | 2795905 | 2797305 | gabP | GabA_perr     |
| STM0764 | 13.93 | STY4867  |          | 4729080 | 4729988 |      | probable_ti   |
| STM3639 | 47.29 | STY4943  |          | 4803706 | 4804389 | sthB | putative_fir  |
|         |       | STY4142  |          | 4005668 | 4005970 |      | putative_lip  |
| STM0638 | 5.68  | STY3760  |          | 3621018 | 3623198 | katG | catalase_(f   |
|         |       | STY1954  |          | 1842770 | 1844134 | pabB | para-aminc    |
| STM0291 | 16.42 | STY0595  |          | 601650  | 602168  | fimF | fimbria-like  |
| STM1796 | 11.76 | STY3851  |          | 3707114 | 3707986 | rbn  | ribonucleas   |
| STM4188 | 28.33 | STY0679  |          | 677946  | 678329  | crcB | putative_m    |
| STM4513 | 6.41  | STY4390  |          | 4251094 | 4252041 | fmt  | methionyl-t   |
| STM1657 | 32.83 | STY1880a |          | 1782539 | 1782802 | pagD | putative_ou   |
| STM1168 | 14.37 | STY3747  |          | 3604987 | 3605622 | yijC | possible_T    |
| STM3711 | 6.1   | STY0728  |          | 728712  | 729851  | citB | citrate_utili |
| STM0530 | 15.64 | STY0775  |          | 772772  | 773161  | sdhC | succinate_l   |
| STM2723 | 6.78  | STY0977  |          | 971986  | 973074  | serC | phosphose     |
| STM0985 | 15.4  | STY0627  |          | 624926  | 625630  | entD | enterobacti   |
| STM0282 | 19.1  | STY4321  |          | 4203167 | 4203493 | nirD | nitrite_redu  |
| STM2540 | 12.36 | STY3722  |          | 3572043 | 3572678 | thiE | thiamine-pl   |
| STM3567 | 73.57 | STY4248  |          | 4112496 | 4113605 | livK | leucine-spe   |
| STM2779 | 36.19 |          | aSTY2895 |         |         |      |               |
|         |       | STY1441  |          | 1392475 | 1393983 |      | putative_es   |
| STM3009 | 23.16 | STY1211  |          | 1167321 | 1167614 | flgM | negative_re   |
| STM1827 | 11.36 | STY3556  |          | 3400613 | 3401587 | yhdH | possible_o    |
| STM4104 | 53.5  | STY0040  |          | 37103   | 38674   |      | putative_se   |
| STM3953 | 37.97 | STY0096  |          | 95086   | 95280   |      | putative_m    |
| STM1320 | 18.6  |          | STY1873  | 1778669 | 1778896 |      | hypothetic    |
|         |       | STY3857  |          | 3712481 | 3713722 | yihS |               |
| STM0055 | 99.8  | STY0064  | aSTY3532 | 64859   | 66634   | oadA | oxaloaceta    |
| STM0546 | 44    | STY0026  |          | 25807   | 28428   | bfcC |               |

|         |       |         |         |         |       |              |
|---------|-------|---------|---------|---------|-------|--------------|
| STM0326 | 23.69 | STY2248 | 2077627 | 2079459 | pduG  | PduG_prot    |
| STM1468 | 79.1  | STY4499 | 4390482 | 4392128 | fumB  | fumarate_f   |
| STM3264 | 13.92 |         | 1989665 | 1990468 | otsB  | trehalose_j  |
| STM3913 | 35.61 | STY2743 | 2580723 | 2582264 | ppx   | exopolyphc   |
| STM2299 | 37.31 | STY4461 | 4346662 | 4346943 |       | putative_m   |
| STM2450 | 9.62  | STY2858 | 2728865 | 2729383 |       | putative_e>  |
| STM0620 | 44.88 | STY0071 | 72396   | 72947   | citX2 | citx_proteir |
| STM4517 | 18.81 | STY3981 | 3847855 | 3849039 | emrD  | multidrug_1  |
| STM3348 | 18.06 | STY3589 | 3441457 | 3442212 | ubiE  | ubiquinone   |
| STM2874 | 11.52 | STY3605 | 3459465 | 3459923 |       | conserved_   |
| STM2086 | 10.96 | STY2295 | 2123019 | 2124080 | rfbU  | putative_gl  |
| STM2439 | 11.52 | STY2625 | 2459776 | 2460717 | yfdC  | putative_m   |
| STM4199 | 24.01 | STY1946 | 1835235 | 1835501 | minE  | cell_divisio |
| STM3567 | 15.2  | STY1315 | 1274508 | 1274990 | yciA  | putative_ac  |
| STM3800 | 20.03 | STY3122 | 2989810 | 2990727 | gcvA  | regulatory_  |
| STM0122 | 8.69  | STY3039 | 2907509 | 2908459 |       | conserved_   |
|         |       | STY3773 | 3638730 | 3639392 |       | hypothetica  |
|         |       | STY0620 | 621146  | 621799  | nfnB  | oxygen-ins   |
| STM0449 | 13.61 | STY3779 | 3644950 | 3646281 | hslU  | heat_shock   |
| STM1457 | 12.8  | STY2258 | 2085537 | 2086865 | pduS  | putative_fe  |
| STM0145 | 5.96  | STY3602 | 3457001 | 3457870 | pldA  | detergent-r  |
| STM3851 | 8.19  | STY3627 | 3482496 | 3483854 | rffT  | probable_4   |
| STM1033 | 8.9   | STY1858 | 1767478 | 1768128 |       | conserved_   |
| STM0197 | 36.05 | STY3175 | 3044673 | 3045416 | stdC  | probable_fi  |
| STM2051 | 26.26 | STY3102 | 2970615 | 2971064 |       | conserved_   |
| STM2853 | 12.13 | STY0469 | 475558  | 476277  | phnR  | probable_r   |
| PSLT048 | 32.61 | STY3585 | 3438193 | 3438741 | tatB  | sec-indepe   |
| STM4187 | 43.14 | STY0564 | 569787  | 570605  | allR  | negative_re  |
| STM4538 | 53.96 |         |         |         |       |              |
| STM0154 | 15.58 | STY0612 | 611956  | 613281  | ykgC  | probable_p   |
| STM4532 | 40.43 | STY0644 | 645392  | 647497  | cstA  | carbon_sta   |
| STM3782 | 46.63 | STY1450 | 1401175 | 1402488 |       | putative_ph  |
| STM2023 | 5.37  |         | 1466582 | 1467220 |       | putative_tr  |
| STM2436 | 10.63 | STY1466 | 1415872 | 1417296 |       | putative_re  |
| STM1954 | 19.7  | STY1438 | 1389041 | 1389820 |       | putative_pe  |
| STM0828 | 45.5  | STY1436 | 1387631 | 1388362 |       | ABC_trans    |
|         |       | STY2102 | 1954694 | 1955740 | ruvB  | Holliday_ju  |
| STM0086 | 20.92 | STY0536 | 543376  | 545052  | ybaL  | putative_tr  |
| STM4052 | 11.25 | STY0676 | 675155  | 676540  | dcuC  | C4-dicarbo   |
| STM4538 | 48.19 | STY4016 | 3878285 | 3879142 |       | putative_P'  |
| STM1307 | 6.02  | STY0647 | 649009  | 650169  |       | putative_ar  |
| STM1350 | 15.02 | STY0640 | 641555  | 643168  | entE  | 2,3-dihydro  |
| STM0981 | 4.29  | STY4645 | 4506245 | 4507270 |       | phage_inte   |
| STM2975 | 10.89 | STY1301 | 1259079 | 1259696 | tdk   | thymidine_   |
| STM3247 | 4.87  | STY1470 | 1419337 | 1421484 | srfC  | putative_vii |
| STM0189 | 15.36 | STY1428 | 1378457 | 1382359 | hrpA  | ATP-deper    |
| STM2087 | 11.6  | STY1396 | 1349331 | 1350164 |       | putative_e>  |
|         |       | STY4746 | 4605780 | 4605986 |       | hypothetica  |
| STM0272 | 20.55 | STY2849 | 2717996 | 2720569 | clpB  | ClpB_prote   |
| STM2063 | 15.82 | STY3169 | 3041128 | 3041988 |       |              |
| STM0239 | 11.17 | STY0413 | 426228  | 426941  |       | hypothetica  |
| STM3836 | 12.6  |         |         |         |       |              |



|         |       |          |         |         |        |              |
|---------|-------|----------|---------|---------|--------|--------------|
| STM1001 | 37.63 | STY0502  | 509127  | 509585  | ybaO   | hypothetica  |
|         |       | STY3249  | 3113788 | 3114351 |        | conserved_   |
|         |       | STY4104  | 3961570 | 3963225 | lldP   | L-lactate_p  |
| STM0129 | 12.09 | STY3971  | 3839541 | 3841202 | yidE   | putative_m   |
| STM2868 | 4.06  | STY3131  | 2999813 | 3001648 | recD   | exonucleas   |
| STM0196 | 27.26 | STY3176  | 3045457 | 3047946 | stdB   | probable_c   |
| STM0608 | 22.22 | STY0440  | 450278  | 450880  |        | probable_p   |
| STM2106 | 7.62  | STY4192  | 4056066 | 4056833 | yhjH   | conserved_   |
| STM1257 | 13.67 | STY4151  | 4011055 | 4011540 |        | putative_ac  |
|         |       | STY4114  | 3975401 | 3977251 | selB   | selenocyste  |
| STM3705 | 11.97 | STY4065  | 3924952 | 3925617 | radC   | putative_Dl  |
| STM1830 | 46.63 | STY4014  | 3876905 | 3877390 |        | putative_P'  |
| STM2556 | 10.83 | STY0745  | 745574  | 746161  | kdpC   | potassium-   |
| STM3976 | 41.32 | STY4915  | 4774545 | 4775318 |        | conserved_   |
| STM0524 | 9.02  | STY2939  | 2814016 | 2814546 | emrR   | putative_tr  |
| STM4589 | 26.8  | STY2343  | 2181100 | 2182503 | baeS   | putative_tw  |
| STM3352 | 6.18  | STY2452  | 2282606 | 2284411 | yejA   | putative_tr  |
|         |       | STY2310  | 2139431 | 2140651 |        | putative_gl  |
| STM1493 | 35.76 | STY2395  | 2225657 | 2226574 | yehZ   | putative_pe  |
| STM4578 | 33.4  | STY2431  | 2260623 | 2261510 |        | putative_hy  |
| STM2753 | 16.28 |          |         |         |        |              |
| STM1101 | 34.2  | STY2407  | 2239215 | 2239916 |        | FAA-hydrol   |
| STM0819 | 7.36  | STY0929  | 919323  | 920756  |        | conserved_   |
|         |       | STY4160  | 4019343 | 4019924 | tag    | 3-methylad   |
| STM1382 | 45.13 | STY4264  | 4128092 | 4129360 |        | putative_rit |
| STM3637 | 18.49 | STY4129  | 3991757 | 3992221 | yalL   | conserved_   |
| STM2909 | 16.92 | STY4231  | 4097781 | 4098338 |        | putative_lip |
| STM1345 | 7.57  | STY3520  | 3362630 | 3363523 | nanA   | N-acetylnei  |
| STM4272 | 7.75  | STY3418  | 3259521 | 3260831 |        | conserved_   |
| STM1772 | 10.32 | STY3312  | 3161255 | 3161968 |        | hypothetica  |
| STM2479 | 21.14 | STY2974  | 2851263 | 2851871 | hycB   | formate_hy   |
| STM2660 | 15.67 | STY3382  | 3226045 | 3226659 |        | putative_m   |
| STM2342 | 17.05 | STY1719  | 1639676 | 1640263 | sseD   | putative_pa  |
| STM1004 | 16.92 | STY1151  | 1112538 | 1113161 | scsC   | secreted_p   |
| STM3356 | 51.21 |          |         |         |        |              |
| STM3274 | 10.13 | STY0876  | 866783  | 867256  |        | transcriptio |
| STM4174 | 32.31 | STY1733  | 1652946 | 1653566 | ttrR   | putative_tw  |
| STM0272 | 18.5  | STY0804  | 800959  | 801711  | gpmA   | phosphogly   |
| STM3586 | 39.08 | STY0851  | 844634  | 845764  |        | putative_in  |
| STM1380 | 7.89  |          | 887921  | 889042  | ylil   | putative_o   |
| STM0848 | 16.36 | STY3495  | 3336495 | 3337061 |        | conserved_   |
| STM0852 | 23.92 | STY2181  | 2024907 | 2025350 | fliJ   | flagellar_Fl |
| STM2349 | 22.24 | STY3311  | 3160321 | 3161187 |        | possible_tr  |
| STM4076 | 10.27 |          |         |         |        |              |
| STM1353 | 20.1  |          |         |         |        |              |
| STM2791 | 28.72 |          |         |         |        |              |
|         |       | STY4780  | 4640367 | 4640729 |        | hypothetica  |
|         |       | STY0475  | 480564  | 481928  |        | hpothetical  |
| STM1785 | 33.12 |          |         |         |        |              |
| STM4531 | 71.1  | STY0645  | 647561  | 647758  |        | conserved_   |
| STM0522 | 36.86 | aSTY0569 |         |         |        |              |
|         |       |          | STY0603 | 606216  | 606380 |              |

|         |       |          |         |         |      |              |
|---------|-------|----------|---------|---------|------|--------------|
| STM1519 | 53.49 | STY0624  | 623134  | 623475  | ramA | transcriptio |
| STM0431 | 24.9  | STY0625  | 623481  | 623729  |      | putative_m   |
| STM1538 | 42.34 | STY1914  | 1807545 | 1809338 |      | hydrogenas   |
| STM2273 | 34.9  |          |         |         |      |              |
| STM0981 | 23.64 |          |         |         |      |              |
| STM0936 | 22.74 | STY2508  | 2342588 | 2342842 | yfaE | putative_fe  |
| STM1631 | 22.35 | STY3323  | 3169843 | 3170130 |      | conserved_   |
| STM4130 | 15.83 | STY0918  | 910323  | 910643  |      | putative_pf  |
| STM1652 | 21.36 | STY0662  | 662201  | 662629  | ybdQ | conserved_   |
| STM1298 | 36.66 | STY4005  | 3869336 | 3869659 |      | putative_Dl  |
| STM1567 | 15.48 | STY4087  | 3945229 | 3946254 | tdh  | threonine_;  |
| STM1474 | 18.88 | STY4004  | 3868976 | 3869245 |      | putative_P'  |
| STM3809 | 56.36 | STY3970  | 3838919 | 3839347 | hslS | heat_shock   |
| STM0168 | 34.63 | STY3968  | 3837754 | 3838089 |      | putative_lip |
| STM1121 | 65.74 |          |         |         |      |              |
| STM4064 | 71.22 | STY3800  | 3665275 | 3665415 | cdh  |              |
| STM0912 | 28.58 |          |         |         |      |              |
| STM4355 | 37.22 | STY4878  | 4740315 | 4740458 |      | hypothetica  |
| STM1057 | 27.58 |          |         |         |      |              |
| STM1223 | 49.28 | STY1657a | 1588293 | 1588424 | malY |              |
| STM3361 | 59.5  | STY0860  | 854264  | 854524  | ybiJ | putative_ex  |
| STM3103 | 23.34 | STY0700  | 696693  | 697034  |      | putative_hy  |
| STM4261 | 12.91 | STY2142  | 1993043 | 1993378 |      | putative_lip |
|         |       | STY2580  | 2416206 | 2417099 |      | conserved_   |
| STM2702 | 40.4  |          |         |         |      |              |
| PSLT050 | 73.62 |          |         |         |      |              |
| STM2746 | 22.22 |          |         |         |      |              |
| STM2372 | 20.84 |          |         |         |      |              |
| STM2774 | 11.94 |          |         |         |      |              |
| STM3427 | 43.55 |          |         |         |      |              |
| STM3176 | 56.7  |          |         |         |      |              |
| STM1818 | 2.44  |          |         |         |      |              |
| STM2043 | 58.47 |          |         |         |      |              |
| STM2174 | 13.2  | STY2523  | 2358062 | 2359258 |      | conserved_   |
| STM2355 | 67.4  | aSTY2584 |         |         |      |              |
| STM3113 | 62.52 | aSTY2657 |         |         |      |              |
| STM3076 | 70.44 | aSTY2711 |         |         |      |              |
| STM0475 | 66.2  | aSTY2719 |         |         |      |              |
| STM1976 | 14.89 | aSTY0076 |         |         |      |              |
| PSLT075 | 9.38  | STY0307  | 319800  | 320294  |      | hypothetica  |
|         |       | STY0349  | 357131  | 357586  | tinR | transcriptio |
|         |       | STY1017  | 1013315 | 1014100 | betA | bacterioph   |
| STM0108 | 16.05 | STY1044  | 1027660 | 1028037 |      | hypothetica  |
|         |       | STY1060  | 1039212 | 1039664 |      | putative_ba  |
| STM0573 | 13.07 | aSTY0328 |         |         |      |              |
| STM1457 | 23.35 | STY0793  | 789404  | 790534  | tolA | tolA_protei  |
| STM2621 | 95    | aSTY1032 |         |         |      |              |
| STM0407 | 36.7  | STY2006  | 1886884 | 1887057 |      | hypothetica  |
|         |       | STY2029  | 1901514 | 1902659 |      | putative_ba  |
|         |       | STY3191  | 3056352 | 3057050 |      | hypothetica  |
| STM0438 | 29.88 | STY0477  | 483048  | 483593  |      | conserved_   |

|         |       |          |          |         |         |      |               |
|---------|-------|----------|----------|---------|---------|------|---------------|
| STM3275 | 13.08 | STY1026  |          | 1018791 | 1019264 |      | putative_m    |
|         |       | STY1048  | aSTY1049 | 1030572 | 1032038 |      | putative_ba   |
|         |       | STY1064  |          | 1042722 | 1043789 |      | putative_ba   |
| STM1533 | 10.6  | STY3089  |          | 2953664 | 2954134 | steE | fimbrial_su   |
| STM2238 | 12.9  | STY3288  |          | 3137348 | 3137878 |      | putative_ea   |
|         |       | STY1028  |          | 1019934 | 1020200 |      | putative_ba   |
|         |       | STY1050  | STY2037  | 1032678 | 1033898 |      | putative_ba   |
| STM2097 | 11.35 | STY1066  |          | 1044292 | 1045023 |      | putative_ba   |
|         |       | STY2042  |          | 1911880 | 1912092 |      | hypothetica   |
|         |       | STY2058  |          | 1920237 | 1920791 |      | putative_m    |
|         |       | STY3659  |          | 3516686 | 3516838 |      | hypothetica   |
| STM0557 | 4.35  | STY4838  |          | 4698333 | 4700849 | sefC | outer_merr    |
| STM3478 | 12.16 | aSTY4615 |          |         |         |      |               |
| STM0591 | 5.48  | STY4522  |          | 4410683 | 4412047 |      | DNA_helic     |
| STM2377 | 14.56 | STY4669  |          | 4531179 | 4531631 |      | putative_m    |
|         |       | STY4822  |          | 4685181 | 4686257 |      | protein_kin   |
| STM1401 | 34.25 | STY4842  |          | 4702716 | 4702925 |      | probable_r    |
|         |       | STY4570  |          | 4448011 | 4449489 |      | putative_ea   |
| STM2532 | 10.47 | STY4587  |          | 4464722 | 4465231 |      | hypothetica   |
|         |       | STY4609  |          | 4481801 | 4482523 | sopE | invasion-as   |
| STM3661 | 10.41 | STY4649  |          | 4508645 | 4509535 |      | Putative_m    |
|         |       | STY4666  |          | 4528781 | 4529794 |      | probable_p    |
| STM3330 | 6.98  | STY4571  |          | 4449482 | 4449925 |      | putative_lip  |
|         |       | STY3967  |          | 3836526 | 3837752 | yidR | putative_A'   |
| STM0784 | 12.84 | STY3947  |          | 3815134 | 3815946 | yidA | conserved_    |
| STM2351 | 20.96 | STY3929  |          | 3792955 | 3793728 | pstB | phosphate_    |
| STM1947 | 15.58 | STY3992  |          | 3857652 | 3858242 | uhpA | Two-compr     |
| STM2581 | 21.09 | STY3481  |          | 3325929 | 3326894 |      | putative_m    |
| STM1129 | 65.54 |          | STY3518  | 3360298 | 3360977 |      |               |
| STM3146 | 15.75 | STY3497  |          | 3337638 | 3338156 |      | conserved_    |
| STM0765 | 51.13 | STY3536  |          | 3377394 | 3378746 |      | possible_rr   |
| STM0477 | 47.84 |          |          |         |         |      |               |
| STM0161 | 61.18 | STY0702  |          | 698273  | 699226  |      | probable_p    |
| STM0054 | 11.88 | STY0721  |          | 718897  | 720051  | nagA | N-acetylglu   |
| STM3576 | 11.77 |          | aSTY0746 |         |         |      |               |
|         |       | STY1543  |          | 1495677 | 1496579 |      | putative_m    |
| STM0175 | 28.61 |          |          |         |         |      |               |
| STM4477 | 20.44 | STY3939  |          | 3803950 | 3804390 | rnpA | RNase_P_      |
| STM1359 | 12.54 |          | aSTY3924 |         |         |      |               |
| STM3568 | 24.25 | STY0011  |          | 10841   | 11245   | yaal | conserved_    |
| PSLT009 | 60.2  | STY1878  |          | 1781177 | 1781734 | pagC | outer_merr    |
| STM4247 | 10.52 | STY2833  |          | 2695031 | 2695660 | rpoE | RNA_polyn     |
| STM1382 | 47.3  | STY3892  |          | 3752664 | 3753593 | rbsK | ribokinase    |
| STM3242 | 9.46  | STY0078  |          | 80361   | 80756   | caiF | transcriptio  |
| STM1836 | 59.31 | STY0142  |          | 143140  | 144906  | ftsI | penicillin-bi |
| STM0157 | 4.8   | STY0180  |          | 186995  | 188617  | yacH | putative_ea   |
| STM3214 | 9.95  | STY3566  |          | 3410246 | 3411130 | yhdJ | putative_ac   |
| STM2163 | 34.92 | STY1573  |          | 1522562 | 1523710 |      | putative_Al   |
| STM1974 | 20.88 | STY4349  |          | 4226381 | 4226668 | yheL | conserved_    |
| STM0484 | 8.14  | STY1240  |          | 1193926 | 1194930 | holB | DNA_polyn     |
| STM4486 | 10.09 | STY1269  |          | 1225509 | 1226630 |      | conserved_    |
| STM1797 | 61.53 | STY1846  |          | 1760574 | 1760822 |      | putative_m    |

|         |       |           |         |         |         |                    |
|---------|-------|-----------|---------|---------|---------|--------------------|
|         |       | STY2314   | 2141948 | 2143426 | wzxC    | putative_tr        |
| STM3489 | 6.94  | STY4308   | 4186144 | 4187382 | hofQ    | type_II_sec        |
| STM1301 | 23.81 | STY1275   | 1232234 | 1232695 |         | putative_m         |
|         |       | STY1842   | 1758799 | 1759110 |         | hypothetica        |
| STM2084 | 36.89 | STY2317   | 2146457 | 2147899 | manC    | mannose-1          |
| STM2043 | 7.78  | STY2347   | 2184687 | 2185394 |         | hypothetica        |
| STM3776 | 2.8   |           |         |         |         |                    |
| STM3070 | 47.77 | STY1825   | 1743564 | 1744559 | gapA    | glyceraldeh        |
| STM1987 | 7.39  | STY2336   | 2166493 | 2169483 | yegE    | putative_m         |
| STM0803 | 24.29 | STY0008   | 8729    | 9319    | mog     | molybdopte         |
| STM0072 | 18.25 | STY0316   | 327278  | 327694  |         | probable_s         |
| STM2460 | 10.24 | STY0359   | 368371  | 369510  |         | conserved_         |
| STM2590 | 38.43 |           |         |         |         |                    |
| STM0843 | 10.24 |           |         |         |         |                    |
| STM2249 | 31.98 | STY4479;_ | 4364950 | 4366686 |         | cytochrome         |
| STM2643 | 9.8   |           |         |         |         |                    |
| STM1049 | 14.64 | STY2645   | 2479743 | 2480978 |         | putative_m         |
| PSLT104 | 24.34 | STY2685   | 2519474 | 2519923 |         | conserved_         |
| STM3429 | 16.81 |           |         |         |         |                    |
| STM2237 | 38.45 |           |         |         |         |                    |
| STM2590 | 41.13 |           |         |         |         |                    |
| STM4305 | 33.34 | STY2775   | 2627135 | 2629512 |         |                    |
| STM1183 | 11.13 | STY2810   | 2669495 | 2670259 | yfhG    | putative_m         |
| STM2560 | 10.51 | STY3848   | 3705233 | 3705679 | ygjM    | conserved_         |
| STM0558 | 71.46 |           |         |         |         |                    |
| STM3144 | 55.47 | STY2976   | 2852688 | 2853044 | hypA    | HypA_prot          |
|         |       | STY3060   | 2923962 | 2924870 | cysD    | ATP_sulfur         |
| STM1005 | 61.64 |           |         |         |         |                    |
| STM0007 | 64.93 | STY2710   | 2542737 | 2543687 | talA    | transaldola        |
| STM0609 | 10.22 | STY0956   | 945765  | 946733  | trxB    | thioredoxin        |
| STM1993 | 11.57 | STY0990   | 985175  | 985921  | kdsB    | 3-deoxy-m          |
| STM0490 | 6.44  | STY0975   | 969211  | 970980  |         | conserved_         |
| STM1046 | 76.77 |           |         |         |         |                    |
| STM1436 | 34.59 | STY4764   | 4621690 | 4621962 | ytfK    | conserved_         |
| STM3787 | 43.4  | STY2512   | 2346265 | 2347623 | glpT    | glycerol-3- $\phi$ |
| STM0618 | 26.13 | STY2573   | 2411356 | 2411628 |         | putative_su        |
|         |       | STY2132   | 1985091 | 1985978 | motA    | motility_prc       |
| STM2428 | 25.06 | STY2595   | 2431710 | 2432384 | dedD    | DedD_prot          |
| STM4479 | 8.67  | STY1259   | 1214060 | 1215304 |         | ABC_trans          |
| STM2121 | 13.31 | STY1696   | 1622537 | 1623178 | ribE    | riboflavin_s       |
| STM4193 | 12.91 |           | STY1277 | 1233033 | 1233698 | putative_rit       |
| STM0543 | 20.1  | STY0030   | 29437   | 29982   | bcfE    | fimbrial_su        |
| STM4355 | 6.47  | STY2193   | 2032567 | 2033382 |         | conserved_         |
| STM1610 | 19.78 | STY1786   | 1707695 | 1707985 |         | conserved_         |
| STM1702 | 7.53  | STY4725   | 4587425 | 4589863 | rnr     | ribonucleas        |
| STM3300 | 13.26 | STY4759   | 4616552 | 4617400 | ytfG    | conserved_         |
| STM3542 | 47.91 |           |         |         |         |                    |
| STM2473 | 13.5  | STY4858   | 4721482 | 4722090 |         | hypothetica        |
| STM3367 | 16.67 | STY2510   | 2344196 | 2345074 |         | putative_tr        |
| STM4369 | 4.53  |           |         |         |         |                    |
| STM4383 | 20.36 | STY2572   | 2409944 | 2411335 |         | putative_m         |

|         |       |         |         |         |         |      |               |
|---------|-------|---------|---------|---------|---------|------|---------------|
| STM3446 | 8.59  | STY2133 |         | 1986106 | 1986690 | flhC | flagellar_tr  |
| STM4213 | 15.55 | STY4607 |         | 4480094 | 4481266 |      | probable_n    |
| STM0125 | 22.5  | STY2703 |         | 2536769 | 2537566 |      | putative_cc   |
| STM3609 | 26.18 | STY2847 |         | 2709975 | 2711276 | kgtP | alpha-ketoq   |
| STM0741 | 15.82 | STY0393 |         | 401742  | 402752  |      | probable_tr   |
| STM0992 | 7.6   | STY2220 |         | 2055131 | 2055874 | cobS | cobalamin_    |
| STM4101 | 32.23 | STY4416 |         | 4283548 | 4284897 | lysC | lysine-sens   |
|         |       | STY2944 |         | 2819830 | 2821386 | gshA | gamma-glu     |
| STM0077 | 63.5  |         |         |         |         |      |               |
| STM1419 | 19.78 | STY2187 |         | 2028944 | 2029681 | fliP | flagellar_bi  |
|         |       | STY2995 |         | 2868356 | 2869534 | prgH | pathogenic    |
| STM2896 | 18.7  | STY2122 |         | 1973172 | 1975250 | flhA | flagellar_bi  |
|         |       | STY2303 |         | 2132127 | 2133110 | rflB | putative_re   |
| STM2361 | 19.12 | STY3897 |         | 3757125 | 3757544 | rbsD | high_affinit  |
| STM3296 | 13.14 | STY0240 |         | 252164  | 253015  | tsf  | elongation_   |
| STM1151 | 18.34 | STY0417 |         | 429218  | 429538  | psiF | phosphate_    |
| STM2222 | 16.09 | STY4410 |         | 4277873 | 4278742 | yjbC | putative_ps   |
| STM3501 | 5.66  | STY0084 |         | 86503   | 88020   | caiT | probable_c    |
| STM1180 | 8.68  | STY1804 |         | 1723228 | 1724136 |      | conserved_    |
| STM0683 | 3.66  |         |         |         |         |      |               |
| STM2842 | 6.45  | STY1658 |         | 1588650 | 1589651 | add  | adenosine_    |
| STM2623 | 100   |         | STY1025 | 1018267 | 1018791 |      | conserved_    |
| STM1428 | 13.24 | STY4812 |         | 4671074 | 4671589 |      | putative_ac   |
|         |       | STY0588 |         | 594664  | 595530  | folD | Fold_bifun    |
| STM0919 | 70.28 |         |         |         |         |      |               |
| STM0588 | 12.75 | STY4916 |         | 4775351 | 4776214 |      | conserved_    |
| STM3121 | 15.49 | STY4094 |         | 3952633 | 3953100 | secB | protein-exp   |
| STM1787 | 16.86 | STY4287 |         | 4161921 | 4162691 | bioH | putative_bi   |
| STM2137 | 57.83 |         |         |         |         |      |               |
| STM4278 | 21.55 | STY1899 |         | 1793714 | 1794130 |      | putative_re   |
| STM2958 | 7.6   | STY0561 |         | 566910  | 568004  | ybbB | hypothetica   |
| STM1039 | 63.4  |         |         |         |         |      |               |
| STM2612 | 98.9  |         |         |         |         |      |               |
| STM2485 | 9.36  | STY4758 |         | 4615506 | 4616471 | ytfF | putative_m    |
| STM1026 | 73.1  |         |         |         |         |      |               |
| STM3301 | 14.07 | STY2848 |         | 2711380 | 2711835 |      | conserved_    |
| STM3504 | 24.88 | STY3385 |         | 3228987 | 3229349 | folB | dihydroneo    |
|         |       | STY4275 |         | 4143115 | 4144548 | glgA | glycogen_s    |
| STM0205 | 41.14 | STY4056 |         | 3917138 | 3917755 |      | putative_m    |
| STM4416 | 14.09 | STY2794 |         | 2650555 | 2651598 | asrA | anaerobic_    |
| STM0685 | 33.61 | STY1242 |         | 1196033 | 1197466 | ptsG | PTS_syste     |
|         |       | STY3880 |         | 3735443 | 3736075 |      | ATP/GTP-t     |
|         |       | STY0870 |         | 861286  | 861789  | dps  | DNA_prote     |
| STM0419 | 9.9   | STY0836 |         | 835204  | 836193  | moaA | molybdenu     |
| STM2585 | 10.2  | STY1699 |         | 1626296 | 1627075 | ssaT | putative_ty   |
| STM1307 | 10.02 | STY2691 |         | 2524275 | 2525327 | yfeG | ethanolami    |
| STM3882 | 11.67 | STY3796 |         | 3660392 | 3661927 |      | putative_Al   |
| STM0175 | 32.5  | STY0693 |         | 689175  | 689492  | ybeB | conserved_    |
| PSLT023 | 14.49 | STY0288 |         | 303553  | 304548  |      | hypothetica   |
| STM2402 | 13.14 | STY2282 |         | 2108699 | 2109778 | hisC | histidinol-pl |
| STM2809 | 41.94 | STY1355 |         | 1316752 | 1317558 | sapF | peptide_tra   |
| STM4551 | 22.17 | STY0418 |         | 429630  | 430742  | adrA | adrA_prote    |

|         |       |         |          |         |         |             |
|---------|-------|---------|----------|---------|---------|-------------|
| STM1339 | 48.53 | STY1940 |          | 1831532 | 1831669 | hypothetica |
|         |       |         | aSTY2345 |         |         |             |
| STM1126 | 31.18 | STY0715 |          | 709980  | 711065  | ybeZ        |
|         |       | STY4488 |          | 4375285 | 4375620 | phnA        |
|         |       | STY2116 |          | 1966751 | 1967320 | conserved_  |
| STM0734 | 9.01  | STY4459 |          | 4337507 | 4344277 | large_repe  |
| STM3718 | 12.59 | STY4078 |          | 3935641 | 3936651 | waaJ        |
| STM2743 | 8.86  | STY1987 |          | 1873610 | 1874331 | sopE2       |
|         |       | STY3718 |          | 3567325 | 3568389 | hemE        |
| STM4532 | 5.43  | STY3912 |          | 3772838 | 3773701 | atpG        |
| STM1473 | 67    | STY2493 |          | 2322394 | 2323530 | ompC        |
| STM0956 | 3.94  | STY0847 |          | 840911  | 842152  | ybhO        |
| STM4211 | 13.32 | STY0453 |          | 461599  | 462049  | ybaD        |
| STM3495 | 14.54 | STY3816 |          | 3678271 | 3678891 | sodA        |
| STM3024 | 17.8  | STY2269 |          | 2094093 | 2094857 | phsC        |
| STM1827 | 25.16 | STY1371 |          | 1327374 | 1328042 | pspA        |
| STM3146 | 12.29 | STY2868 |          | 2737496 | 2738086 | grpE        |
| STM1945 | 11.34 | STY4375 |          | 4241012 | 4241515 | rpsE        |
| STM4491 | 10.93 | STY4071 |          | 3929404 | 3930438 | waaQ        |
| STM1542 | 19.85 | STY3573 |          | 3423822 | 3424367 | hemG        |
| STM3446 | 6.86  | STY2829 |          | 2690859 | 2692658 | lepA        |
|         |       | STY3613 |          | 3467268 | 3467471 | yifL        |
| STM1545 | 7.37  | STY3638 |          | 3494786 | 3496045 | rho         |
| STM2345 | 17.22 | STY2185 |          | 2028154 | 2028567 | fliN        |
| STM4247 | 23.52 | STY1930 |          | 1823207 | 1824277 | dadX        |
| STM2947 | 6.44  | STY2616 |          | 2449561 | 2450646 | aroC        |
| STM0066 | 17.34 | STY2554 |          | 2389676 | 2391013 | nuoF        |
| STM0602 | 15.78 | STY4061 |          | 3921697 | 3922338 | pyrE        |
| STM0963 | 10.06 | STY4606 |          | 4479569 | 4480084 |             |
| STM1419 | 20.02 | STY3013 |          | 2885671 | 2886345 | spaP        |
| STM1570 | 12.8  | STY3827 |          | 3688116 | 3689375 | rhaA        |
| STM0632 | 37.63 | STY3586 |          | 3438745 | 3438999 | tatA        |
| STM2272 | 30.41 | STY3351 |          | 3194450 | 3196780 | parC        |
|         |       | STY2650 |          | 2485913 | 2487115 | nupC        |
| STM3796 | 34.95 | STY3656 |          | 3512960 | 3514660 | ilvG        |
| STM3677 | 68.95 | STY0118 |          | 118656  | 119351  | araD        |
| STM4108 | 13.82 |         | STY3058  | 2921921 | 2922526 | cysC        |
| STM2356 | 52.59 | STY3046 |          | 2912765 | 2913358 |             |
| STM0437 | 19.42 | STY3870 |          | 3725331 | 3726065 |             |
| STM3247 | 57.93 | STY0573 |          | 579922  | 581070  | glxK        |
| STM1497 | 95.5  | STY0963 | STY1567  | 958292  | 958909  | dmsB        |
| STM1830 | 45.83 |         |          |         |         |             |
| STM4464 | 2.84  | STY1434 |          | 1385267 | 1386817 |             |
| STM1298 | 3.69  | STY1336 |          | 1293319 | 1295916 | topA        |
| STM4035 | 56.35 |         |          |         |         |             |
| STM2839 | 16.97 | STY1947 |          | 1835623 | 1836750 | rnd         |
| STM3646 | 13.33 | STY1422 |          | 1372648 | 1373637 | ldhA        |
|         |       | STY2002 |          | 1882219 | 1882833 |             |
| STM1296 | 16.67 | STY1390 |          | 1342585 | 1343175 |             |
| STM3731 | 14.68 | STY2103 |          | 1955713 | 1956324 | ruvA        |
| STM0530 | 16.5  | STY0582 |          | 590323  | 590832  | purE        |
| STM2729 | 22.39 | STY0622 |          | 622264  | 622845  |             |

|          |       |          |         |         |                  |
|----------|-------|----------|---------|---------|------------------|
|          |       | STY1412  | 1362270 | 1363250 | conserved_       |
| STM4456  | 9.8   | STY1482  | 1435416 | 1436048 | hypothetica      |
| STM1827  | 25.53 | STY0376  | 386985  | 388559  | putative_rtr     |
| STM2107  | 21.3  | STY1283  | 1237565 | 1237918 | conserved_       |
| STM0926  | 10.16 | STY1458  | 1408209 | 1409447 | putative_be      |
| STM1861  | 31.22 |          |         |         |                  |
| STM2842  | 12.79 | STY2106  | 1958187 | 1958780 | ruvC crossover_  |
| STM1495  | 8.88  | STY3977  | 3842953 | 3844275 | dsdA D-serine_d  |
| STM3492  | 14.93 | STY3127  | 2994381 | 2995187 | conserved_       |
| STM3858  | 9.79  |          |         |         |                  |
| STM1805  | 10.11 |          |         |         |                  |
|          |       | STY3303  | 3148995 | 3149714 | possible_h       |
| STM3280  | 35.98 | STY3640  | 3496937 | 3498202 | rhIB putative_A  |
| STM4519  | 7.59  | STY4137  | 4001081 | 4002403 | xylA D-xylose_is |
| STM0514  | 32.97 |          |         |         |                  |
|          |       | STY1226a | 1182681 | 1182929 | conserved_       |
| STM3152  | 8.92  | STY3107  | 2973418 | 2974266 | conserved_       |
| STM1061  | 16.36 | STY2873  | 2741767 | 2742243 | conserved_       |
| STM4201  | 3.47  | STY3209  | 3074659 | 3077532 | gcvP glycine_del |
| STM3598  | 33.47 | STY3259  | 3121165 | 3122211 | ansB L-asparagi  |
| STM3744  | 12.48 | STY3743  | 3600451 | 3601233 | murl glutamate_  |
| STM1128  | 5.56  | STY3264  | 3124206 | 3124925 | conserved_       |
| STM3166  | 32.46 |          |         |         |                  |
|          |       | STY0667  | 665734  | 667239  | citT citrate_car |
| STM4334  | 24.73 |          |         |         |                  |
|          |       | STY2447  | 2277111 | 2277683 | yeiP             |
| STM4189  | 20.39 | STY2917  | 2798936 | 2799235 | putative_tra     |
| STM4005  | 45.03 | STY1370  | 1326223 | 1327230 | pspF psp_opero   |
| STM4448  | 16.53 | STY3195  | 3061120 | 3061665 | probable_is      |
|          |       | STY0397  | 406388  | 407020  | RhtC-like_t      |
| STM2546  | 11.75 | STY4148  | 4010135 | 4010602 | yafP putative_ac |
| STM2461  | 8.62  | STY2437  | 2267889 | 2268938 | yeiH putative_m  |
| STM0906  | 40.9  |          |         |         |                  |
| STM4380  | 5.27  | STY2389  | 2220042 | 2221727 | yehU putative_tw |
| STM4162  | 19.23 | STY2428  | 2257799 | 2258656 | yeiG putative_es |
| STM0691  | 10.39 | STY2318  | 2147896 | 2149119 | wcal putative_gl |
| STM2162  | 19.57 | STY2394  | 2224484 | 2225653 | yehY putative_pe |
| STM1821  | 8.45  | STY4102  | 3959610 | 3960800 | lctD putative_L- |
| STM2241  | 19.13 | STY4358  | 4233316 | 4233945 | rplC 50S_ribosc  |
| STM2991  | 17.42 | STY4715  | 4576713 | 4578032 | amiB N-acetylm   |
| STM0447  | 13.62 | STY4365  | 4237073 | 4237483 | rplP 50S_ribosc  |
| STM2925  | 30.71 | STY3194  | 3060097 | 3060849 | possible_li      |
| STM3376  | 12.43 | STY4736  | 4597742 | 4598491 | yjfP conserved_  |
| STM2270  | 12.44 | STY4901  | 4763416 | 4764042 | conserved_       |
| STM0768  | 11    | STY4693  | 4555035 | 4556063 | yjeK conserved_  |
| STM2156A | 29.87 | STY2385  | 2217595 | 2218053 | yehR putative_li |
| STM4227  | 2.66  | STY0711  | 706916  | 708454  | Int apolipoprot  |
| STM2030  | 24.55 | STY3245  | 3110497 | 3110994 | conserved_       |
| STM2994  | 5.97  | STY1097  | 1075470 | 1077524 | helD helicase_   |
|          |       | STY0814  | 810271  | 811044  | modA molybdate-  |
| STM1255  | 6.35  | STY0888  | 882339  | 883877  | yliB putative_Al |
| STM3961  | 10.2  | STY3502  | 3341334 | 3342188 | conserved_       |
| STM1781  | 4.2   | STY0819  | 814916  | 816199  | ybhC possible_p  |
| STM3130  | 8.54  | STY0863  | 855280  | 856201  | ybiN             |
| STM0244  | 19.84 | STY3210  | 3077695 | 3078087 | gcvH glycine_cle |

|         |         |          |           |         |       |              |
|---------|---------|----------|-----------|---------|-------|--------------|
|         | STY0284 |          | 300696    | 301163  | rnhA  | ribonucleas  |
|         | STY3403 |          | 3248471   | 3249505 |       | possible_o   |
| STM1842 | 17.77   | STY1723  | 1642803   | 1643129 | sseA  | putative_pa  |
| STM0933 | 15.65   | STY0854  | 848481    | 849155  | ybiH  | hypothetica  |
| STM4517 | 49.92   | STY0899  | 892908    | 894140  | mdfA  | multidrug_t  |
| STM0452 | 25.48   | STY0447  | 457512    | 457877  |       | conserved_   |
| STM2683 | 35.38   |          |           |         |       |              |
| STM4363 | 14.75   |          |           |         |       |              |
| STM3380 | 19.04   | STY4886  | 4750002   | 4750289 |       | hypothetica  |
| STM3109 | 20.51   | STY4518  | 4407323   | 4407814 |       | Putative_ar  |
| STM4123 | 39.98   |          |           |         |       |              |
|         |         | STY4418  | 4287376   | 4287621 |       | putative_e)  |
| STM0159 | 22.19   |          |           |         |       |              |
|         |         | STY4399  | 4262945   | 4263382 | yjaB  | putative_ac  |
| STM4272 | 17.14   | STY2219  | 2054034   | 2055140 | cobT  | nicotinate-r |
| STM2734 | 22.65   |          |           |         |       |              |
| STM4310 | 25.31   | STY4643  | 4505250   | 4505492 | apl   | phage_reg    |
| PSLT110 | 32.21   | STY3464  | 3307435   | 3307740 | rpsO  | 30S_ribosc   |
| STM0153 | 13.11   | STY3203  | 3068924   | 3069190 |       | conserved_   |
| STM2840 | 31.06   | STY3442  | 3285768   | 3286052 | gatB  | PTS_syste    |
| STM2129 | 20.14   | STY1474  | 1426254   | 1426730 |       | putative_m   |
| STM2993 | 18.75   | STY1529  | 1484622   | 1485032 | hyaE2 | hydrogenas   |
| STM2956 | 17.49   | STY1453  | 1404112   | 1404651 | rimL  | ribosomal-p  |
| STM4307 | 15.62   | STY3572  | 3416892   | 3417113 | yhdV  | possible_li  |
| STM1351 | 66.7    | STY0088  | 91561     | 91848   | fixX  | ferredoxin_  |
| STM1732 | 34.62   | STY1563  | 1512377   | 1512686 |       |              |
| STM0462 | 70.32   | STY2808  | 2667746   | 2668084 | glnB  | nitrogen_re  |
| STM0555 | 32.39   |          | aSTY0602a |         |       |              |
| STM4572 | 24.27   | STY2689  | 2522340   | 2522669 |       | putative_m   |
| STM3166 | 18.66   |          |           |         |       |              |
| STM2246 | 46.2    | STY2736  | 2573190   | 2573549 |       | putative_ar  |
| STM2212 | 35.39   | STY2784  | 2641888   | 2642223 | fdx   | ferredoxin   |
| STM2087 | 6.05    | STY0765  | 764172    | 765945  |       |              |
| STM1345 | 31.21   | STY0687  | 682792    | 683055  | ybeD  | conserved_   |
|         |         | STY2533  | 2368537   | 2368914 |       | putative_m   |
| STM3974 | 14.1    |          |           |         |       |              |
| STM4402 | 19.48   |          |           |         |       |              |
| STM1323 | 8.16    |          |           |         |       |              |
| STM0019 | 17.61   |          | aSTY4843  |         |       |              |
| PSLT010 | 100     | STY4846  | 4704346   | 4705191 |       | putative_ou  |
| STM4097 | 24.41   |          |           |         |       |              |
| PSLT107 | 100     |          |           |         |       |              |
| STM2189 | 35.03   |          |           |         |       |              |
| STM2089 | 18.67   |          |           |         |       |              |
| STM0498 | 51.31   |          |           |         |       |              |
| STM3390 | 58.23   | aSTY0520 |           |         |       |              |
| STM0353 | 28.5    | aSTY0544 |           |         |       |              |
| STM1444 | 8.57    | aSTY0569 |           |         |       |              |
| STM4205 | 61.01   | aSTY0606 |           |         |       |              |
| STM4532 | 28.25   | aSTY0644 |           |         |       |              |
| STM1375 | 41.3    | STY1255  | 1207444   | 1208235 |       | putative_e)  |



|         |       |         |          |         |         |                   |
|---------|-------|---------|----------|---------|---------|-------------------|
| STM0142 | 8.3   | STY1595 |          | 1540134 | 1540817 | hypothetica       |
| STM3624 | 13.93 | STY1612 |          | 1549208 | 1549534 | putative_m        |
| STM0994 | 11.87 | STY1628 |          | 1560870 | 1561205 | hypothetica       |
| STM1268 | 34.82 | STY1853 |          | 1764189 | 1764344 | hypothetica       |
| STM1918 | 10.38 | STY1068 |          | 1045516 | 1046268 | putative_ba       |
| STM0498 | 17.99 | STY1606 |          | 1546229 | 1546660 | hypothetica       |
| STM0055 | 18.76 | STY1622 |          | 1557389 | 1557835 | conserved_        |
| STM2772 | 60.09 | STY1643 |          | 1572347 | 1572919 | DNA-invert        |
| STM0627 | 14.46 | STY1062 |          | 1041830 | 1042417 | putative_ba       |
| STM2977 | 14.08 | STY2038 | aSTY1049 | 1907613 | 1908143 | conserved_        |
|         |       | STY2054 | STY2054A | 1917389 | 1917544 | hokW Similar_to_  |
|         |       | STY1616 |          | 1551982 | 1553478 | hypothetica       |
| STM0014 | 4.93  | STY1632 |          | 1564930 | 1566084 | putative_ba       |
| STM2085 | 7.79  | STY1889 |          | 1786795 | 1787337 | conserved_        |
| STM2703 | 3.97  | STY1072 | STY2014  | 1048497 | 1050008 | hypothetica       |
| STM0896 | 18.42 | STY2048 |          | 1914557 | 1915114 | putative_ba       |
|         |       | STY2064 |          | 1924145 | 1924567 | conserved_        |
|         |       | STY1635 |          | 1567003 | 1568106 | putative_ba       |
| STM1355 | 8.92  | STY1891 |          | 1788274 | 1788687 | putative_pe       |
|         |       | STY2025 |          | 1897826 | 1898476 | putative_ba       |
|         |       | STY3091 |          | 2954726 | 2955844 | possible_si       |
|         |       | STY2066 |          | 1924903 | 1925322 | putative_re       |
| STM0980 | 7.18  | STY2296 |          | 2124655 | 2125656 | rfbV putative_gl  |
| STM0090 | 23.81 | STY4590 |          | 4466754 | 4467050 | hypothetica       |
| STM3191 | 10.7  | STY4629 |          | 4496059 | 4496754 | hypothetica       |
|         |       | STY4652 |          | 4512573 | 4513877 | vexD Vi_polysac   |
| STM1436 | 6.65  | STY4557 |          | 4438648 | 4439562 | putative_m        |
| STM2589 | 13.96 | STY4574 |          | 4452916 | 4453302 | hypothetica       |
|         |       | STY4591 |          | 4467128 | 4467586 | hypothetica       |
| STM2882 | 27.94 | STY4826 |          | 4689323 | 4689562 | bacterioph        |
| STM4026 | 1.81  | STY4851 |          | 4712736 | 4716035 | conserved_        |
| STM2978 | 5.52  | STY4625 | aSTY3677 | 4491144 | 4492280 | putative_m        |
|         |       | STY4528 |          | 4415909 | 4417252 | hypothetica       |
| STM1005 | 3.82  | STY4552 |          | 4435339 | 4436490 | rci shufflon-sp   |
|         |       | STY4827 |          | 4689566 | 4690426 | putative_ph       |
| STM1776 | 26.45 | STY3197 |          | 3063268 | 3064366 | prfB peptide_ch   |
| STM1386 | 7.26  | STY2634 |          | 2468435 | 2470441 | pgtB phosphogly   |
| STM0489 | 12.33 | STY2234 |          | 2064488 | 2065261 | cbiF precorrin-4  |
| STM1919 | 59.6  | STY4234 |          | 4099515 | 4101158 | methyl-acc        |
|         |       | STY0143 |          | 144893  | 146380  | murE UDP-N-acc    |
| STM2305 | 3.26  | STY0181 |          | 189006  | 191603  | acnB aconitate_t  |
| STM2515 | 8.27  | STY0170 |          | 174007  | 174957  | putative_g        |
| STM3513 | 9.18  |         |          |         |         |                   |
| STM3011 | 8.61  | STY0220 |          | 231184  | 232074  | fhuD ferrichrome  |
| STM2559 | 69.28 | STY0259 |          | 273613  | 275754  | ldcC lysine_dec   |
| STM2830 | 35.59 | STY1547 |          | 1499485 | 1500012 | conserved_        |
| STM0021 | 43.93 |         |          |         |         |                   |
| STM2364 | 11.61 | STY0735 |          | 735177  | 735719  | seqA seqA_prot    |
| STM0353 | 8.76  | STY2173 |          | 2017348 | 2018613 | yedE putative_m   |
| STM3712 | 7.44  | STY4084 |          | 3941839 | 3942885 | waaF ADP-hepto    |
| STM2745 | 8.21  | STY2228 |          | 2060434 | 2061147 | cbiL precorrin-2  |
| STM4160 | 7.26  | STY1326 |          | 1282639 | 1283997 | trpC indole-3-gly |

|         |       |          |          |         |         |      |              |
|---------|-------|----------|----------|---------|---------|------|--------------|
| STM2532 | 8.85  | STY0093  |          | 93940   | 94362   |      | probable_s   |
| STM2119 | 24.54 | STY3930  |          | 3793743 | 3794468 | phoU | phosphate_   |
|         |       | STY0015  |          | 16094   | 16438   |      | putative_ph  |
| STM0776 | 12.68 | STY3265  |          | 3125080 | 3126132 | mutY | A/G-specifi  |
| STM2971 | 17.77 | STY3491  |          | 3332682 | 3333464 |      | putative_m   |
| STM2130 | 21.69 | STY3527  |          | 3368465 | 3368869 |      | conserved_   |
| STM3973 | 47.04 | STY0682  |          | 679335  | 679538  | tatE | sec-indepe   |
| PSLT072 | 31.36 |          |          |         |         |      |              |
| STM3201 | 31.88 | STY1189  |          | 1150839 | 1151066 |      | putative_lip |
| STM2293 | 20.68 | STY4299  |          | 4177131 | 4177532 | hslR | heat_shock   |
| STM2562 | 15.27 |          |          |         |         |      |              |
| STM1640 | 17.15 | STY4267  |          | 4131687 | 4132382 |      | conserved_   |
|         |       | STY4894  |          | 4756264 | 4758555 | mdbB | putative_ph  |
| STM1204 | 3.4   | STY1244  |          | 1197551 | 1199726 | fhuE |              |
| STM4572 | 10.07 |          |          |         |         |      |              |
| STM0747 | 30.98 |          | aSTY4259 |         |         |      |              |
| STM2975 | 11.51 | STY4898  |          | 4760729 | 4761220 |      | putative_m   |
| STM0772 | 8.02  | STY4932  |          | 4793635 | 4794282 | gpmB | probable_p   |
| STM2761 | 25.4  |          |          |         |         |      |              |
| STM0498 | 22.43 | STY4235  |          | 4101355 | 4103553 |      | heavy_met    |
| STM0301 | 7.8   |          |          |         |         |      |              |
| STM2088 | 16.94 |          |          |         |         |      |              |
| STM2740 | 45.74 |          |          |         |         |      |              |
| STM3474 | 3.42  | STY2908  |          | 2788919 | 2790433 |      | putative_m   |
| STM2493 | 33.08 | STY4440  |          | 4310250 | 4310492 | yjbO | putative_m   |
| PSLT008 | 26.91 | STY4494  |          | 4382756 | 4383517 | adiY | putative_Ai  |
|         |       | STY0901  |          | 895006  | 896217  |      | putative_m   |
| STM1578 | 12.46 | STY2714  |          | 2547296 | 2547871 | yffH | conserved_   |
| STM2991 | 44.75 | STY2687  |          | 2520548 | 2521417 | amiA | probable_N   |
| STM0767 | 9.59  | STY0932  |          | 923683  | 924654  | hcr  | NADH_oxid    |
| STM4345 | 6.44  | STY0967  |          | 961490  | 962911  | ycaM | probable_tr  |
| STM3374 | 2.75  | STY0996  |          | 990720  | 995186  | mukB | cell_divisio |
| STM2594 | 83.68 |          |          |         |         |      |              |
| STM2588 | 29.07 |          | STY3777  | 3643326 | 3644318 | ftsN | cell_divisio |
| STM1000 | 16.99 |          |          |         |         |      |              |
| STM0734 | 39.37 | STY4703  |          | 4560475 | 4562265 | frdA | fumarate_r   |
| STM3121 | 19.92 | STY2655  |          | 2493002 | 2493886 | xapR | xanthosine   |
| STM2594 | 31.13 |          |          |         |         |      |              |
| STM1488 | 16.24 | STY2779  |          | 2637127 | 2637969 | sseA | putative_th  |
| STM0399 | 19.88 | STY2815  |          | 2678655 | 2679290 | yfhB | putative_m   |
| STM0710 | 58.7  | STY2807  |          | 2666237 | 2667697 |      | putative_tr  |
| STM2167 | 9.04  | STY4709  |          | 4570220 | 4571296 | yjeQ | putative_m   |
| STM4063 | 9.27  | STY2211  |          | 2048039 | 2049493 | amn  | AMP_nucle    |
| STM2318 | 20.4  | STY2546  |          | 2379379 | 2380656 | nuoN | NADH_def     |
| STM3100 | 7.81  | STY2590  |          | 2426285 | 2427682 |      | putative_ar  |
| STM0682 | 9.07  | STY1237  |          | 1191470 | 1192279 | pabC | 4-amino-4-   |
| STM2469 | 24.25 | STY2261  |          | 2087777 | 2088229 | pduV | putative_pr  |
| STM4146 | 98.92 | aSTY3739 | aSTY4353 |         |         |      |              |
| STM0682 | 53.54 | STY1576  |          | 1525912 | 1527072 |      | putative_re  |

|         |       |         |         |         |         |        |               |
|---------|-------|---------|---------|---------|---------|--------|---------------|
| STM0179 | 5.69  | STY0341 |         | 348682  | 349626  | sinR   | LysR-famil    |
| STM3364 | 6.45  | STY1681 |         | 1608145 | 1610184 |        | putative_m    |
| STM3453 | 32.88 | STY4753 |         | 4609433 | 4610095 | fkIB   | probable_F    |
| STM3064 | 13.4  | STY0134 |         | 135983  | 136927  | leuO   | probable_a    |
| STM1224 | 20.35 |         | STY2152 | 1999201 | 1999338 |        | hypothetica   |
| STM2760 | 40.42 |         |         |         |         |        |               |
| STM4533 | 6.61  |         |         |         |         |        |               |
| STM3627 | 7.04  | STY2544 |         | 2377251 | 2378168 |        | putative_hy   |
| STM1956 | 6.18  | STY2570 |         | 2408171 | 2409124 |        | putative_tr   |
|         |       | STY4802 |         | 4661886 | 4663289 |        | putative_m    |
| STM0447 | 1.89  |         |         |         |         |        |               |
| STM0205 | 7.9   | STY2589 |         | 2424773 | 2426194 |        | putative_ar   |
| STM0097 | 14.83 | STY1229 |         | 1184943 | 1185464 |        | conserved_    |
| STM2214 | 46.58 | STY1767 |         | 1690203 | 1690667 | nlpC   | putative_lip  |
|         |       | STY1111 |         | 1083598 | 1083927 |        | hypothetica   |
| STM0175 | 48.22 | STY0336 |         | 343633  | 346143  | safC   | outer-mem     |
| STM0935 | 8.22  | STY0255 |         | 269925  | 270884  | accA   | acetyl-coer   |
| STM0600 | 6.99  | STY0485 |         | 489339  | 490295  | cyoA   | cytochrome    |
| STM0737 | 14.88 | STY0176 |         | 182065  | 183954  | aceF   | dihydrolipo   |
| STM4220 | 12.79 | STY1796 |         | 1716184 | 1716942 |        | conserved_    |
| STM1361 | 49.55 |         |         |         |         |        |               |
| STM4196 | 9.23  | STY2900 |         | 2782658 | 2783554 | mig-14 | putative_tr   |
| STM1117 | 23.11 | STY1662 |         | 1591701 | 1592141 |        | putative_m    |
| STM0328 | 44.42 | STY1579 |         | 1528279 | 1529532 |        | putative_m    |
| STM3391 | 8.17  | STY4425 |         | 4294450 | 4295640 | malE   | periplasmic   |
|         |       | STY0351 |         | 359306  | 360025  |        | possible_o    |
| STM1799 | 7.76  | STY0409 |         | 423107  | 424201  | yaiW   | putative_lip  |
|         |       | STY0445 |         | 454536  | 456383  | secD   | protein-exp   |
| STM3965 | 10.87 | STY0144 |         | 146377  | 147735  | murF   | UDP-N-ace     |
| STM0797 | 21.71 | STY2593 |         | 2430911 | 2431399 | cvpA   | colicin_V_p   |
| STM3177 | 53.18 | STY2904 |         | 2786824 | 2787498 | tctD   | transcriptio  |
| STM3478 | 7.3   | STY1753 |         | 1672269 | 1673756 |        | conserved_    |
| STM2351 | 50.36 | STY4251 |         | 4115862 | 4116629 | livG   | high-affinity |
| STM0984 | 21.48 | STY0504 |         | 511391  | 513172  | mdlB   | putative_Al   |
| STM0150 | 60.71 | STY0617 |         | 615827  | 617221  | pheP   | phenylalan    |
| STM2211 | 24.01 | STY2446 |         | 2276572 | 2276976 |        | conserved_    |
| STM1368 | 7.54  | STY4771 |         | 4631069 | 4632277 |        | putative_su   |
| STM3557 | 8.3   | STY2838 |         | 2700857 | 2701444 | yfiK   | putative_m    |
| STM4121 | 14.76 | STY4161 |         | 4020081 | 4020785 | yhjY   | putative_m    |
| STM2175 | 17.81 | STY3458 |         | 3298444 | 3299322 | yhbV   | conserved_    |
| STM3533 | 41.08 | STY2522 |         | 2357030 | 2357812 |        | putative_tr   |
| STM4163 | 15.22 | STY2786 |         | 2644088 | 2644630 | yfhE   | chaperone_    |
| STM0176 | 36.52 | STY0032 |         | 30509   | 31213   | bcfG   | fimbrial_ch   |
| STM1806 | 6.38  | STY4774 |         | 4634604 | 4635620 | fbp    | fructose-1,6  |
| STM1015 | 52.79 | STY4896 |         | 4759357 | 4760094 | dnaC   | probable_C    |
| STM0915 | 75.4  |         |         |         |         |        |               |
|         |       | STY4903 |         | 4764702 | 4765490 |        | ferric_iron_  |
|         |       | STY4086 |         | 3944023 | 3945219 | kbl    | 2-amino-3-    |
|         |       | STY4180 |         | 4039201 | 4039953 | yhjQ   | conserved_    |
|         |       | STY3451 |         | 3294153 | 3294788 |        | conserved_    |
| STM3553 | 9.11  | STY2511 |         | 2345190 | 2346260 | glpQ   | glycerophos   |
|         |       | STY2506 |         | 2339060 | 2341345 | nrdA   | ribonucleos   |

|         |       |          |                    |         |         |      |              |
|---------|-------|----------|--------------------|---------|---------|------|--------------|
| STM1415 | 36.29 | STY3017  |                    | 2888677 | 2889972 | spal | secretory_ε  |
| STM2554 | 30.8  | STY3787  |                    | 3653158 | 3653586 | yiiR | putative_m   |
| STM3982 | 14.86 | STY0737  |                    | 737499  | 737984  |      | possible_5-  |
| STM0153 | 23.13 | STY0780  |                    | 779343  | 780551  | sucB | dihydrolipo. |
| STM4174 | 41.36 | STY3876  |                    | 3731061 | 3732470 | glnG | Two-compr    |
| STM2142 | 10.11 | STY4327  |                    | 4209280 | 4209843 | pabA | para-aminc   |
| STM2972 | 10.48 | STY3881  |                    | 3736421 | 3739270 | polA | DNA_polyn    |
| STM0321 | 16.01 | STY0909  |                    | 901973  | 902449  |      | conserved_   |
| STM0838 | 33.9  | STY4339  |                    | 4217765 | 4219672 | yheS | probable_Α   |
| STM0581 | 53.99 | STY4463  |                    | 4349095 | 4349418 | soxS | regulatory_  |
|         |       | STY2825  |                    | 2687272 | 2688000 | recO | DNA_repai    |
| STM1467 | 2.39  | STY2085  |                    | 1937444 | 1939495 | opdB | oligopeptid  |
| STM0107 | 17.33 | STY3713  |                    | 3564352 | 3564807 |      | possible_e.  |
| STM0668 | 8.04  | STY3862  |                    | 3719625 | 3720317 |      | conserved_   |
| STM0768 | 3.26  | STY1697  |                    | 1623395 | 1624768 | ydhE | hypothetica  |
| STM0128 | 16.21 |          | STY2675            | 2510629 | 2511348 |      | putative_ar  |
| STM1957 | 100   | STY1844  | STY0256;_STY0437;_ | 1759921 | 1760379 | tnpA | transposas   |
|         |       | STY2850  |                    | 2720699 | 2721430 | yfiH | conserved_   |
| STM0661 | 37.66 | STY0060  |                    | 60161   | 61081   | yaaF | putative_nu  |
| STM2634 | 99.6  | aSTY1013 |                    |         |         |      |              |
| STM2150 | 47.39 |          | STY1994            | 1877792 | 1877968 |      | hypothetica  |
| PSLT002 | 42.32 | STY3184  |                    | 3052190 | 3052441 |      | endonuclea   |
| STM1684 | 10.1  |          | STY4728a           | 4591934 | 4592185 |      |              |
| STM2137 | 19.92 | STY4859  |                    | 4722451 | 4723362 |      | hypothetica  |
| STM2463 | 31.13 | STY2256  |                    | 2082995 | 2084389 | pduP | putative_Ci  |
| STM2316 | 10.01 | STY4478  |                    | 4364001 | 4364957 | nrfD | cytochrome   |
| STM3882 | 15.11 | STY2113  |                    | 1964037 | 1964780 |      | conserved_   |
| STM2734 | 19.79 | STY4453  |                    | 4323622 | 4325010 |      | putative_in  |
| STM3296 | 14.99 | STY0009  |                    | 9376    | 9942    | yaaH | conserved_   |
| STM0876 | 6.44  | STY0048  |                    | 47414   | 48313   | nhaR | transcriptio |
| STM2079 | 6.64  | STY3636  |                    | 3492395 | 3493441 |      | lipopolysac  |
| STM0457 | 48.77 | STY3597  |                    | 3451801 | 3452610 | yigL | conserved_   |
| STM0602 | 20.09 | STY3622  |                    | 3475920 | 3476660 | hemD | uroporphyr   |
| STM1290 | 45.58 | STY3228  |                    | 3095113 | 3096159 | epd  | D-erythroε   |
| STM0910 | 8.03  | STY1296  |                    | 1254751 | 1255656 |      | conserved_   |
| STM1820 | 28.65 |          | STY1917            | 1810671 | 1811075 | hyaE | hydrogenas   |
| STM4483 | 36.97 | STY3162  |                    | 3034527 | 3035288 | kduD | 2-keto-3-de  |
| STM3247 | 63.15 | STY3097  |                    | 2964858 | 2966000 |      | conserved_   |
| STM1374 | 46.9  | STY3125  |                    | 2992699 | 2993142 |      | conserved_   |
| STM3170 | 31.9  | STY3819  |                    | 3680221 | 3680736 |      | possible_r   |
| STM3905 | 3.66  | STY3108  |                    | 2974380 | 2975744 | ygdH | conserved_   |
| STM0490 | 16.37 | STY3846  |                    | 3703910 | 3704839 |      | putative_lip |
| STM0124 | 6.55  | STY3594  |                    | 3447467 | 3449731 | metE | 5-methyltet  |
| STM3044 | 18.41 | STY3610  |                    | 3464804 | 3465760 | xerC | integrase/r  |
| STM0309 | 8.03  | STY3635  |                    | 3491209 | 3492339 | wecB | UDP-N-ace    |
| STM4292 | 6.82  | STY3741  |                    | 3592550 | 3593512 | birA | bifunctiona  |
| STM0671 | 4.66  | STY3134  |                    | 3008249 | 3011620 | recC | exonucleas   |
| STM3626 | 54.01 | STY1309  |                    | 1269082 | 1270086 | oppF | oligopeptid  |
| STM0989 | 8.53  | STY3789  |                    | 3654396 | 3655163 | tpiA | triosephosφ  |
| STM1960 | 16.8  | STY0527  |                    | 533092  | 533643  | apt  | adenine_ph   |
| STM4540 | 8.37  |          |                    |         |         |      |              |

|         |       |          |         |         |         |       |                |
|---------|-------|----------|---------|---------|---------|-------|----------------|
| STM2777 | 17.94 | STY0628  |         | 625677  | 627932  | fepA  | ferrienterot   |
| STM0818 | 11.4  | STY0976  |         | 971108  | 971800  |       | putative_m     |
| STM0063 | 9.64  | STY0338  |         | 347043  | 347864  |       | conserved_     |
|         |       | STY1514  |         | 1470680 | 1471168 |       | putative_re    |
| STM0189 | 4.71  | STY1479  |         | 1431906 | 1432967 |       | possible_A     |
| STM3121 | 16.73 |          |         |         |         |       |                |
| STM4381 | 7.28  | STY1403  |         | 1354289 | 1355236 |       | conserved_     |
| STM2084 | 7.04  |          | STY1353 | 1314180 | 1315562 |       | hypothetica    |
| STM1804 | 7.22  | STY0556  |         | 562946  | 564079  |       | outer_merr     |
| STM0459 | 37.39 | STY1005  |         | 1003596 | 1004057 |       | putative_tra   |
| STM0957 | 27.54 | STY0954  |         | 942163  | 943884  | cydC  | transport_/    |
| STM0062 | 44.88 |          | STY0669 | 668145  | 668564  | citX  | conserved_     |
| STM2995 | 8.43  | STY0652  |         | 653380  | 654126  | dsbG  | thiol:disulfic |
| STM1500 | 17.2  | STY1319  |         | 1277177 | 1277815 |       | putative_ou    |
| STM1573 | 25.07 | STY1491a |         | 1448758 | 1449193 |       |                |
| STM3644 | 16.77 | STY1443  |         | 1396054 | 1396629 |       | putative_e)    |
| STM3280 | 44.5  | STY1410  |         | 1360852 | 1362223 | dbpA  |                |
| STM3208 | 5.74  | STY1376  |         | 1329465 | 1330862 |       | putative_A     |
| STM0882 | 20.34 | STY3095  |         | 2960705 | 2962000 | ygcA  | putative_Rl    |
| STM2119 | 57.35 | STY3149  |         | 3020503 | 3021216 |       | putative_m     |
| STM0858 | 10.69 | STY3186  |         | 3052722 | 3053522 |       | conserved_     |
| STM0143 | 11.48 | STY3252  |         | 3115630 | 3116610 | pilT  | Type_II_se     |
| STM2383 | 7.43  | STY0489  |         | 493813  | 495111  | tig   | trigger_fac    |
| STM2563 | 13.82 | STY4228  |         | 4094749 | 4095327 |       | conserved_     |
|         |       | STY4117  |         | 3980242 | 3982197 |       | conserved_     |
| STM4447 | 46.53 | STY4018  |         | 3880242 | 3880985 |       | conserved_     |
| PSLT020 | 31.65 | STY3353  |         | 3197757 | 3198149 |       | possible_e     |
| STM3014 | 4.1   | STY3159  |         | 3031938 | 3032645 | ygeA  | conserved_     |
| STM0232 | 5.3   |          |         |         |         |       |                |
| STM3966 | 20.29 |          |         |         |         |       |                |
| STM1694 | 46.63 | STY4170  |         | 4029971 | 4030873 | dppC  | dipeptide_t    |
|         |       | STY4133  |         | 3994888 | 3996138 | avtA  | valine--pyru   |
| STM2273 | 8.31  | STY4099  |         | 3956485 | 3957681 |       | putative_ra    |
| STM2811 | 5.14  | STY4045  |         | 3904647 | 3906356 | yicH  | putative_e)    |
|         |       | STY0389  |         | 396876  | 399850  | res   |                |
| STM0430 | 18.69 | STY2975  |         | 2852017 | 2852478 | hycA  | formate_hy     |
| STM0945 | 8     | STY3302  |         | 3148033 | 3148956 |       | conserved_     |
| STM2683 | 11.04 | STY2977  |         | 2853114 | 2853986 | hypB  | hydrogena:     |
| STM4272 | 48.21 | STY2412  |         | 2243900 | 2244595 | yohK  | puatative_r    |
| STM2105 | 36.97 | STY2293  |         | 2120634 | 2122073 | rfbM2 | mannose-1      |
| STM2253 | 21.83 | STY2334  |         | 2164849 | 2165430 | dcd   | deoxycytdi     |
| STM3813 | 100   | STY2474  | STY3965 | 2305384 | 2305941 | dsbE1 | thiol:disulfic |
| STM1744 | 21.53 | STY2454  |         | 2285515 | 2286540 | yejE  | putative_bi    |
| STM3235 | 11    | STY2374  |         | 2205062 | 2205880 |       | putative_gr    |
| STM2970 | 11.4  | STY1975  |         | 1861658 | 1862539 | htpX  | heat_shock     |
| STM3877 | 28.49 | STY4380  |         | 4243770 | 4244126 | rpsM  | 30S_ribosc     |
| STM1927 | 45.23 | STY4212  |         | 4078877 | 4079311 | uspA  | universal_s    |
| STM2325 | 13.35 | STY3522  |         | 3364558 | 3365058 | sspB  | stringent_s    |
| STM3541 | 7.19  | STY4191  |         | 4054908 | 4055837 | kdgK  | 2-dehydro-     |
| STM4482 | 63.16 | STY4284  |         | 4158873 | 4160189 | gntT  | high-affinity  |
| STM2546 | 20.31 | STY4762  |         | 4620142 | 4620882 | cysQ  | cysQ_prote     |

|         |       |         |           |              |              |
|---------|-------|---------|-----------|--------------|--------------|
| STM1057 | 16.35 | STY3360 | 3203384   | 3203965      | conserved_   |
| STM3523 | 43.05 | STY2959 | 2834527   | 2835300 srlR | glucitol_op  |
| STM3331 | 15.91 | STY2416 | 2246976   | 2248217      | putative_o   |
| STM3226 | 62.1  | STY3334 | 3178004   | 3178663 yghB | DedA-famil   |
| STM2389 | 34.1  | STY1712 | 1636450   | 1636698 ssal | putative_p   |
| STM4343 | 40.59 | STY0777 | 773502    | 775268 sdhA  | succinate_   |
| STM3560 | 10.96 | STY0835 | 833899    | 834807       | conserved_   |
| STM3036 | 5.34  |         |           |              |              |
| STM4227 | 24.22 | STY1214 | 1168942   | 1169346 flgC | putative_fl  |
| STM2792 | 20.29 | STY0826 | 823390    | 824679 bioA  | adenosylm    |
| STM3332 | 5.26  | STY3512 | 3355140   | 3356243      | conserved_   |
|         |       | STY4032 | 3894205   | 3894822 rmbA | conserved_   |
| STM4376 | 24.93 | STY3366 | 3208434   | 3209597      | conserved_   |
| STM3747 | 7.02  | STY1716 | 1637973   | 1638755 sseF | putative_p   |
| STM0346 | 40.68 | STY0872 | 863334    | 863849 ompX  | outer_merr   |
| STM1320 | 14.85 | STY4740 | 4602188   | 4602493 sgaB | putative_P   |
| STM3793 | 9.29  |         |           |              |              |
| STM0257 | 35.2  | STY0428 | 436395    | 437567 araJ  |              |
| STM1041 | 8.83  |         | aSTY4883  |              |              |
| STM3626 | 29.5  | STY0495 | 502837    | 503211 ybaV  | putative_e   |
| STM4355 | 28.74 | STY0599 | 604191    | 604502       | hypothetica  |
| STM0555 | 41.85 |         | STY0602;_ | 605550       | 605735       |
| STM2764 | 27.32 | STY0329 | 340209    | 340913       |              |
| STM0345 | 43.16 |         | STY0375   | 386344       | 386673       |
| STM0341 | 26.01 | STY0377 | 388659    | 389402       | hypothetica  |
| STM2269 | 6.78  | STY3106 | 2972804   | 2973349 syd  | possible_tr  |
| STM2647 | 26.96 | STY4516 | 4406494   | 4406712      | syd_proteir  |
| STM0233 | 30.93 |         | STY3799   | 3664919      | 3665116      |
| STM1315 | 33.22 | STY3999 | 3864845   | 3865132      | hypothetica  |
| STM2856 | 56.59 | STY3314 | 3163093   | 3163341 hybG | putative_P   |
| STM3587 | 23.17 | STY1528 | 1484326   | 1484625      | hydrogenas   |
| STM3025 | 13.73 |         | STY1540   | 1494534      | 1494911 marR |
| STM3058 | 34.48 | STY3974 | 3841645   | 3841992 yidH | multiple_ar  |
| STM1532 | 5.64  | STY4048 | 3909336   | 3911417 recG | ATP-deper    |
| STM2065 | 23.97 | STY4177 | 4036993   | 4037184      | putative_m   |
| STM2006 | 18.48 | STY3987 | 3852815   | 3853105 ilvN | acetohydro   |
| STM3528 | 38.6  |         |           |              |              |
| STM0599 | 60.45 | STY1757 | 1676481   | 1676873      | conserved_   |
| STM0250 | 86.49 |         |           |              |              |
| STM2702 | 60.3  |         |           |              |              |
| STM4478 | 54.01 |         |           |              |              |
| STM2223 | 48.44 | STY3643 | 3501966   | 3502697      | putative_m   |
| STM0446 | 32.57 | STY3487 | 3330734   | 3331027      | conserved_   |
| STM0503 | 18.69 |         | STY2147;_ | 1996817      | 1996933      |
| STM1997 | 60.74 |         |           |              | hypothetica  |
| STM1998 | 45.81 |         |           |              |              |
| STM1876 | 32.56 |         |           |              |              |

|          |       |                            |          |         |      |             |
|----------|-------|----------------------------|----------|---------|------|-------------|
| STM3766  | 59.02 |                            |          |         |      |             |
| PSLT023  | 84.1  |                            |          |         |      |             |
| STM3972  | 26    |                            |          |         |      |             |
| STM1811  | 38.24 |                            |          |         |      |             |
| STM2432  | 9.28  |                            |          |         |      |             |
| STM1473  | 39.88 | aSTY2493                   |          |         |      |             |
| STM1951  | 30.91 | aSTY2581                   |          |         |      |             |
| STM2354  | 69.25 | aSTY2585                   |          |         |      |             |
| STM0007  | 60.97 | aSTY2710                   |          |         |      |             |
| STM3331  | 19.21 | STY2717                    | 2549822  | 2551681 | aegA | putative_o  |
| STM0325  | 55.07 |                            |          |         |      |             |
| STM0175  | 11.27 | STY0205                    | 213248   | 215839  | staC | outer_merr  |
|          |       | STY0326                    | 339076   | 339336  |      | conserved_  |
|          |       | aSTY0587                   |          |         |      |             |
|          |       | STY1030                    | 1020578  | 1020865 |      | putative_ba |
|          |       | STY1052                    | 1034420  | 1035361 |      | putative_ba |
|          |       | STY2027                    | 1900606  | 1901058 |      | putative_ba |
| STM1787  | 2.59  | STY0405                    | 416740   | 419625  |      | puative_au  |
| STM2697  | 29.05 | STY1019                    | 1014493  | 1014693 |      | prophage_   |
|          |       | STY1046                    | 1028451  | 1029203 |      | putative_pr |
| STM3577  | 4.51  | STY2021                    | 1895228  | 1895959 |      | putative_ba |
| STM3027  | 47.69 | STY3087                    | 2952350  | 2953123 | steC | periplasmic |
|          |       | STY3285                    | 3136204  | 3136707 |      | putative_e  |
| STM1365  | 24.17 | STY0947                    | 937728   | 937934  |      | hypothetica |
| STM0118  | 14.86 | STY1040                    | 1025810  | 1026199 |      | putative_pr |
| STM2194  | 24.35 | STY1056                    | 1036681  | 1037070 |      | putative_ba |
|          |       | STY2031                    | 1903201  | 1903590 |      | putative_ba |
| STM1026  | 3.21  | STY3193                    | 3058163  | 3059890 |      | possible_in |
| STM0157  | 7.76  | STY3347                    | 3191038  | 3191730 |      | putative_m  |
| STM1869A | 29.75 | aSTY1042                   |          |         |      |             |
|          |       | STY1058                    | 1037612  | 1038757 |      | hypothetica |
|          |       | STY1076                    | 1051463  | 1052164 |      | conserved_  |
| STM1848  | 11.77 | STY2050                    | 1915387  | 1915941 |      | hypothetica |
| STM3352  | 95    | aSTY0064 STY3532           | 3373656  | 3375431 | oadA | oxaloaceta  |
| STM3484  | 37.71 | STY3667                    | 3519664  | 3520521 |      | DNA_aden    |
| STM1832  | 24.48 | STY4854                    | 4717653  | 4717928 |      | hypothetica |
| STM0395  | 4.09  | aSTY4403                   |          |         |      |             |
| STM3499  | 9.55  | STY4534                    | 4421390  | 4421839 |      | hypothetica |
| STM2219  | 12.62 | STY4677                    | 4539197  | 4539490 |      | putative_m  |
| STM1727  | 30.92 | STY4830                    | 4691653  | 4691880 |      | hypothetica |
| STM2807  | 9.42  |                            | aSTY4870 |         |      |             |
| STM0625  | 13.98 | STY4578                    | 4456256  | 4456588 |      | putative_m  |
| STM1229  | 16.7  | STY4595                    | 4471619  | 4471978 |      | conserved_  |
| STM3484  | 36.41 | STY4636                    | 4502229  | 4503089 |      | DNA_aden    |
| STM1320  | 17.6  | STY2419 STY4125;_STY4657;_ | 2249467  | 2249970 | insB | insertion_e |
|          |       | STY4674                    | 4537567  | 4537710 |      | hypothetica |
|          |       | STY4579                    | 4456592  | 4458097 |      | putative_m  |
| STM3624  | 14.49 | STY3957                    | 3827907  | 3828539 | torD | TorD_prote  |
| STM2580  | 12.32 | STY3937                    | 3800574  | 3801938 | thdF | thiophene_  |
|          |       | STY3907                    | 3769054  | 3769869 | atpB | ATP_synth   |
| STM0652  | 9.74  | STY4080                    | 3937522  | 3938331 | waaZ | lipopolysac |
| STM0511  | 41.66 | STY3492                    | 3333472  | 3334284 |      | possible_A  |

|         |       |          |           |         |                   |             |
|---------|-------|----------|-----------|---------|-------------------|-------------|
| STM0769 | 53.68 |          |           |         |                   |             |
| STM4007 | 17.15 | STY3523  | 3365064   | 3365720 | sspA stringent_s  |             |
| STM3577 | 10.55 | STY3554  | 3397118   | 3398161 | mreB rod_shape-   |             |
| STM0863 | 58.99 | STY0688  | 683163    | 684374  | dacA D-alanine_   |             |
| STM0012 | 11.01 |          |           |         |                   |             |
| STM4534 | 10.33 | STY0731  | 732380    | 732832  | fur ferric_uptal  |             |
| STM4598 | 50.36 | STY3954  | 3823363   | 3824057 | torR              |             |
| STM1788 | 62.5  | STY1526  | 1482984   | 1483712 | hyaC2 Ni/Fe-hydr  |             |
| STM2273 | 10.38 |          |           |         |                   |             |
| STM3485 | 10.89 | STY3935  | 3798276   | 3799178 | yidZ putative_Ly  |             |
|         |       | STY3898  | 3757761   | 3759629 | kup membrane      |             |
|         |       | STY1779  | 1701377   | 1702600 | rfc O-antigen_    |             |
| STM3110 | 13.06 | STY0809  | 805177    | 806193  | galE UDP-gluco    |             |
| STM2030 | 15.41 | STY2235  | 2065245   | 2065823 | cbiT precorrin-8  |             |
|         |       | STY4081  | 3938430   | 3939575 | waakK lipopolysac |             |
|         |       |          | STY0098;_ | 96050   | 97354             | puatative_ε |
|         |       | STY0160  | 165410    | 165601  | yacG conserved_   |             |
|         |       | STY0193  | 203598    | 204260  | yadF carbonic_a   |             |
| STM4049 | 12.65 | STY0233  | 244326    | 244712  | yaeH conserved_   |             |
| STM0651 | 5.33  | STY4392  | 4252698   | 4253822 | conserved_        |             |
| STM1751 | 20.63 | STY4337  | 4217086   | 4217397 | conserved_        |             |
| STM3588 | 3.97  | STY1251  | 1204119   | 1205423 | ndh NADH_def      |             |
| STM1639 | 52.48 | STY1868  | 1776009   | 1776539 | putative_cy       |             |
| STM2532 | 14.61 | STY1830  | 1748312   | 1749058 | putative_ou       |             |
| STM1491 | 2.18  | STY2329  | 2156864   | 2159023 | wzc putative_ty   |             |
| STM0823 | 55.5  | STY1254  | 1207090   | 1207347 | putative_se       |             |
|         |       | STY1859  | 1768322   | 1768648 | conserved_        |             |
| STM3165 | 20.64 | STY1828  | 1745871   | 1746728 | putative_ox       |             |
| STM1828 | 41.59 | STY2332  | 2161288   | 2162868 | yegH putative_m   |             |
| STM2545 | 37.2  | STY4949  | 4808327   | 4809013 | lasT putative_RI  |             |
| STM2277 | 12.51 |          |           |         |                   |             |
| STM4275 | 12.7  | STY2321  | 2150560   | 2151681 | gmd GDP-manr      |             |
| STM0185 | 4.46  | STY2365  | 2196156   | 2197517 | putative_pr       |             |
| STM4314 | 19.81 |          |           |         |                   |             |
| STM2765 | 65.68 | aSTY0329 | STY0343   | 349946  | 350113            |             |
| STM0111 | 57.54 |          |           |         |                   |             |
|         |       | STY1082  | 1058924   | 1061032 | conserved_        |             |
| STM3518 | 6.41  | STY3748  | 3605821   | 3607221 | udhA possible_p   |             |
| STM0518 | 53.3  | STY3040  | 2908499   | 2909275 | hyi putative_hy   |             |
|         |       | STY2618  | 2451780   | 2452331 | conserved_        |             |
| STM4125 | 39.57 | STY2660  | 2497378   | 2498340 | putative_tr       |             |
| STM2592 | 69.8  |          |           |         |                   |             |
| STM2851 | 20.59 | STY2771  | 2624292   | 2624723 | ndk nucleoside    |             |
| STM2598 | 75.4  |          |           |         |                   |             |
| STM4290 | 5.62  | STY2751  | 2587671   | 2589248 | guaA GMP_syntl    |             |
| STM3619 | 20.87 | STY2790  | 2646961   | 2647455 | yfhP conserved_   |             |
| STM1050 | 80.99 |          |           |         |                   |             |
| STM3502 | 52.04 | STY3812  | 3674986   | 3675684 | cpxR two-compo    |             |
| STM2701 | 12.79 |          |           |         |                   |             |
| STM2815 | 20.31 | STY3036  | 2903746   | 2904954 | possible_rr       |             |
| STM0615 | 2.14  |          |           |         |                   |             |
| STM2163 | 33.79 | STY2678  | 2512849   | 2513943 | cysA sulphate_tr  |             |



|         |       |          |         |         |             |
|---------|-------|----------|---------|---------|-------------|
| STM1576 | 17.02 | STY2724  | 2561420 | 2562283 | putative_m  |
| STM2945 | 51.74 | STY0971  | 964573  | 965531  | sopD2       |
| STM0006 | 37.83 | STY1009  | 1005836 | 1007269 | putative_io |
| STM2166 | 10.07 | STY0993  | 987917  | 988720  | smtA        |
| STM3965 | 11.65 | STY2161  | 2006277 | 2007263 | putative_de |
| STM4344 | 15.56 | STY2284  | 2110842 | 2111432 | hisH        |
| STM3356 | 18.61 | STY2563  | 2399017 | 2400843 | putative_sc |
| STM2465 | 26.46 | STY2259  | 2086868 | 2087422 | pduT        |
| STM3960 | 11.55 | STY1851  | 1762727 | 1763365 | putative_pr |
| STM3338 | 25.55 | STY1169  | 1131729 | 1133009 | putative_tr |
| STM0201 | 11.99 | STY1784  | 1705619 | 1706377 | putative_ou |
| STM4275 | 43.09 | STY0403  | 413263  | 415149  | prpE        |
|         |       | STY1793  | 1713175 | 1715427 | katE        |
| STM3204 | 3.85  | STY4712  | 4573578 | 4574732 | yjeS        |
| STM1473 | 36.28 |          |         |         |             |
|         |       | aSTY2203 |         |         |             |
| STM2160 | 53.04 | STY1730  | 1650681 | 1651409 | putative_tr |
| STM3655 | 40.27 | STY4734  | 4596823 | 4597146 | yjfN        |
| STM4419 | 26.06 |          |         |         |             |
|         |       | STY2505  | 2337977 | 2338705 | ubiG        |
| STM3793 | 6.04  |          |         |         | 3-demethyl  |
| STM1524 | 52.12 | STY4876  | 4738848 | 4740219 |             |
| STM4205 | 48.89 | STY2528  | 2362704 | 2363687 | pmrF        |
| STM0491 | 13.1  | STY2562  | 2398326 | 2398925 | putative_li |
| STM3770 | 44.74 |          |         |         | putative_o  |
| STM1269 | 15.31 | STY1852  | 1763561 | 1764160 | aroQ        |
| STM4301 | 8.45  |          |         |         |             |
| STM4184 | 16.42 | STY0400  | 409554  | 410441  | prpB        |
| STM3915 | 38.94 | STY2842  | 2704254 | 2704673 | yfiG        |
| STM2545 | 13.53 | STY0423  | 433360  | 434037  | aroM        |
|         |       | STY4432  | 4303894 | 4304262 | dgkA        |
| STM2732 | 15.88 | STY2577  | 2414041 | 2414592 | conserved_  |
| STM3925 | 21.25 | STY2527  | 2361544 | 2362701 | putative_li |
| STM4268 | 13.87 | STY4422  | 4291293 | 4291703 | putative_m  |
| STM2015 | 47.94 | STY1748  | 1667459 | 1668459 | ynhG        |
| STM0361 | 7.68  | STY1483  | 1436331 | 1437176 | N-hydroxy   |
| STM1659 | 13.88 | STY2491  | 2320085 | 2321146 | ada         |
| STM1239 | 16.99 | STY3997  | 3863614 | 3864357 | putative_G  |
| STM1048 | 15.91 | STY2823  | 2686149 | 2686529 | acpS        |
|         |       | STY0187  | 196389  | 197183  | speD        |
| STM0353 | 17.37 | STY2266  | 2092179 | 2092646 | sbmC        |
| STM0931 | 9.2   | STY0168  | 172501  | 173064  | ampD        |
| STM0611 | 10.43 | STY0179  | 186191  | 186982  | probable_s  |
| STM4024 | 3.67  | STY1778  | 1698557 | 1700485 | thrS        |
| STM3288 | 3.8   | STY0464  | 470077  | 471525  | thiamine_b  |
| STM2558 | 6.05  | STY1645  | 1573199 | 1574581 | putative_ar |
| STM4549 | 19    | STY0541  | 548428  | 548907  | conserved_  |
| STM0702 | 7.96  | STY0542  | 549108  | 549902  | conserved_  |
| STM0979 | 9.9   | STY0638  | 639109  | 640065  | fepB        |
| STM0977 | 1.57  | STY4814  | 4673101 | 4675956 | valS        |
| STM3824 | 48.91 | STY4947  | 4806975 | 4807691 | arcA        |
| STM3152 | 38.12 | STY3394  | 3238302 | 3239870 | cheM        |
| STM4369 | 10.73 | STY4049  | 3911423 | 3912112 | trmH        |

|         |       |          |         |         |             |
|---------|-------|----------|---------|---------|-------------|
| STM1663 | 11.28 | STY1860  | 1768842 | 1769975 | putative_m  |
| STM3113 | 62.91 | STY2657  | 2494155 | 2495411 | xapB        |
| STM2113 | 5.09  | STY2890  | 2769449 | 2770564 | iroB        |
| STM2514 | 15.39 |          |         |         | putative_gl |
| STM2621 | 100   | STY1032  | 1021558 | 1021797 | putative_de |
| STM2750 | 3.67  |          |         |         |             |
| STM1775 | 14.51 | STY2835  | 2697638 | 2698375 | yfiC        |
| STM4098 | 28.73 | STY3370  | 3212004 | 3213800 | assT        |
| STM1535 | 6.53  | STY4223  | 4089228 | 4090295 | putative_Hl |
| STM0952 | 19.75 | STY4306  | 4185365 | 4185838 | yrfB        |
| STM2995 | 7.95  | STY2690  | 2522798 | 2524075 | hypothetica |
| STM1422 | 11.92 | STY3010  | 2883533 | 2884630 | spaS        |
| STM2045 | 61.26 | aSTY2701 |         |         | secretory_f |
|         |       | STY3815  | 3677512 | 3678264 | yiiM        |
| STM0051 | 37.22 | STY0706  | 702239  | 703174  | ybeK        |
| STM3485 | 28.45 | STY0748  | 750002  | 750208  | ybfA        |
|         |       | STY3023  | 2896388 | 2896831 | invH        |
| STM4526 | 13.26 | STY0600  | 604664  | 605260  | fimW        |
| STM4010 | 14.55 | STY0817  | 812795  | 813613  | ybhA        |
| STM3586 | 42.93 | STY0803  | 800092  | 800868  | ABC_trans   |
| STM3645 | 16.44 | STY1091  | 1070003 | 1071055 | ompA        |
| STM1179 | 15.24 | STY1216  | 1170083 | 1171294 | flgE        |
| STM3041 | 26.84 | STY1901  | 1794933 | 1796015 | prfA        |
| STM4253 | 7.35  | STY2137  | 1988269 | 1989690 | otsA        |
| STM1865 | 40.76 | STY2207  | 2045298 | 2045459 | hypothetica |
| STM3798 | 31.52 | STY3909  | 3770215 | 3770685 | atpF        |
| STM2127 | 24.32 | STY1687  | 1613874 | 1614281 | gloA        |
| STM0829 | 40.23 | STY2160  | 2005588 | 2006256 | yecS        |
| STM0505 | 17.65 | STY1389  | 1341794 | 1342570 | putative_o  |
|         |       | STY2831  | 2693393 | 2694349 | rseB        |
| STM0369 | 12.5  | STY0773  | 770734  | 772017  | gltA        |
| STM0703 | 10.22 | STY1270  | 1226711 | 1228174 | phoQ        |
| STM2222 | 10.5  | STY3710  | 3560084 | 3561373 | purD        |
| STM4146 | 5.5   | STY3467  | 3309421 | 3312099 | infB        |
| STM2247 | 7.98  | STY2246  | 2076210 | 2076884 | pduD        |
| STM1560 | 8.47  | STY4793  | 4651177 | 4652829 | treC        |
|         |       | STY1726  | 1644774 | 1646267 | spiA        |
| STM3767 | 11.03 | STY1233  | 1187951 | 1188880 | fabD        |
| STM0575 | 43.26 | STY1346  | 1305567 | 1305785 | osmB        |
| STM2441 | 10.38 | STY3535  | 3376462 | 3377361 | ttdA        |
|         |       | STY4073  | 3931552 | 3932349 | waaP        |
| STM2632 | 100   |          |         |         | lipopolysac |
| STM2410 | 19.26 | STY1180  | 1141409 | 1141864 | csgB        |
| STM4477 | 11.28 | STY3580  | 3433640 | 3434341 | ubiB        |
| STM4220 | 16.56 | STY2860  | 2730753 | 2731100 | rplS        |
| STM2297 | 21.79 | STY3630  | 3486179 | 3487390 | rffA        |
| STM1793 | 10.69 | STY3651  | 3507601 | 3507963 | conserved_  |
| STM2686 | 6     | STY1220  | 1173625 | 1174728 | flgl        |
| STM2029 | 4.37  | STY4319  | 4200791 | 4202164 | cysG        |
| STM2571 | 11.56 | STY3143  | 3015066 | 3015941 | lgt         |
| STM2388 | 5.6   | STY3389  | 3232006 | 3233751 | dnaG        |
| STM2253 | 16.81 | STY0466  | 472360  | 473229  | phnU        |

|         |       |         |         |         |      |               |
|---------|-------|---------|---------|---------|------|---------------|
| STM1569 | 70.5  | STY3841 | 3700591 | 3701493 | fdoH | formate_de    |
| STM0662 | 57.17 | STY0866 | 858539  | 859261  | glnQ | glutamine_    |
| STM3019 | 24.82 | STY3578 | 3430203 | 3431366 | fadA | small_(beta   |
| STM0286 | 12.61 | STY2123 | 1975243 | 1976394 | flhB | flagellar_bi  |
| STM3628 | 9     | STY0998 | 997638  | 998186  |      | putative_e    |
| STM0101 | 73.57 | STY4119 | 3983434 | 3984129 | yiaS | putative_su   |
|         |       | STY0197 | 206675  | 207898  | yadE | conserved_    |
| STM0402 | 23.5  | STY0653 | 654566  | 655129  | ahpC | alkyl_hydr    |
| STM2191 | 60.19 | STY3155 | 3027580 | 3028608 | galR | galactose_    |
| STM4040 | 34.28 | STY3837 | 3695190 | 3696221 |      | putative_lip  |
| STM2864 | 28.36 | STY2101 | 1953830 | 1954615 | yebI | high-affinity |
| STM0820 | 2.29  | STY1504 | 1460668 | 1463196 |      | putative_hy   |
| STM1763 | 75.41 | STY1487 | 1439583 | 1441127 | narY | respiratory_  |
| STM1761 | 69.49 | STY1485 | 1438211 | 1438891 | narV | respiratory_  |
| STM0103 | 9.41  | STY0370 | 379568  | 380893  | stbD | putative_fir  |
| STM0812 | 3.28  | STY1312 | 1271381 | 1272841 | cls  | cardiolipin_  |
| STM2404 | 11.44 | STY1928 | 1820401 | 1821315 |      | conserved_    |
| STM0192 | 21.22 | STY1978 | 1865584 | 1866168 |      | conserved_    |
| STM3750 | 8.55  | STY2099 | 1952055 | 1953014 | yebL | high-affinity |
| STM1260 | 12.48 | STY1401 | 1352710 | 1353741 |      | putative_m    |
| STM3766 | 58.42 |         | 530792  | 531715  |      | conserved_    |
| STM4307 | 20.16 | STY0661 | 661366  | 662133  |      | molybdopte    |
| STM3773 | 15.88 |         |         |         |      |               |
| STM1340 | 39.07 | STY0635 | 635695  | 636684  | fepG | ferric_enter  |
| STM0344 | 25.3  | STY0374 | 385465  | 386199  |      | possible_tr   |
| STM0058 | 47.18 | STY0673 | 671331  | 672356  | citC | [citrate_(pr  |
| STM0741 | 59.88 | STY1921 | 1813551 | 1814687 | appB | probable_c    |
| STM0816 | 18.77 |         |         |         |      |               |
| STM4460 | 4.58  | STY2094 | 1945307 | 1946782 | zwf  | glucose_6-    |
| STM2589 | 14.6  |         |         |         |      |               |
| STM4054 | 38.34 |         |         |         |      |               |
| STM2851 | 4.03  | STY2878 | 2758027 | 2759190 |      | putative_ty   |
|         |       | STY3227 | 3093928 | 3095091 | pgk  | phosphogly    |
| STM0482 | 17.23 | STY0448 | 457903  | 458595  |      | putative_de   |
| STM1626 | 38.47 | STY3325 | 3170215 | 3171858 |      |               |
| STM2750 | 44.41 | STY2953 | 2831196 | 2831759 | srlA | PTS_syste     |
| STM3674 | 17.49 |         | 302488  | 303120  |      | hypothetica   |
| STM2197 | 27.52 | STY4887 | 4750276 | 4750578 |      | hypothetica   |
| STM2356 | 21.71 | STY3118 | 2987054 | 2987476 | fucU | fucose_or     |
| STM0256 | 5     |         |         |         |      |               |
| STM1170 | 7.12  | STY0419 | 430757  | 431566  | proC | pyrroline-5-  |
|         |       | STY0481 | 485502  | 486392  | cyoE | cytochrome    |
| STM4328 | 14.36 | STY3145 | 3018413 | 3018943 |      | conserved_    |
| STM4413 | 30.94 | STY4784 | 4642545 | 4643678 |      | hypothetica   |
| STM3242 | 36.03 | STY1558 | 1510106 | 1510432 |      | putative_m    |
| STM3014 | 25.04 | STY3649 | 3506373 | 3507260 | ilvY | LysR-famil    |
| STM3315 | 52.07 | STY2960 | 2835293 | 2836258 | gutQ | putative_ph   |
| STM3541 | 22.05 |         |         |         |      |               |
| STM3983 | 6.27  |         | 392297  | 392812  |      |               |
| STM0793 | 24.59 | STY2949 | 2827136 | 2827636 | oraA | putative_re   |
| STM3011 | 60.48 | STY2425 | 2254472 | 2255494 | galS | mgl_repres    |

|         |       |         |         |         |      |              |
|---------|-------|---------|---------|---------|------|--------------|
| STM0834 | 3.77  | STY2463 | 2293861 | 2294868 | yejK | nucleoid-as  |
| STM1359 | 5.98  | STY2369 | 2199596 | 2200495 |      |              |
| STM2815 | 6.65  | STY2402 | 2234412 | 2235848 | yohG | putative_lip |
| STM3858 | 52.02 | STY2439 | 2269939 | 2271627 | fruA | PTS_syste    |
| STM2421 | 13.85 | STY2371 | 2201854 | 2203125 |      | putative_nu  |
| STM3275 | 13.38 | STY2405 | 2237354 | 2238547 |      | putative_n-  |
| STM1656 | 17.82 | STY4127 | 3990189 | 3990662 | yiaM | putative_m   |
| STM0916 | 32.29 | STY0926 | 917067  | 917390  |      | conserved_   |
| STM0351 | 12.09 | STY4726 | 4589954 | 4590685 | yjFH | probable_tl  |
| STM1255 | 22.28 | STY4347 | 4225631 | 4226017 | yheN | conserved_   |
| STM0994 | 8.62  | STY4719 | 4581304 | 4582584 | hflX | HflX_protei  |
| STM1937 | 26.18 | STY3460 | 3300598 | 3301842 |      | probable_a   |
| STM2894 | 17.01 | STY4930 | 4792824 | 4793150 | trpR | probable_tl  |
| STM1322 | 18.47 | STY2946 | 2821885 | 2822451 |      | conserved_   |
| STM1595 | 14.77 | STY2449 | 2278912 | 2279631 |      | putative_m   |
| STM1799 | 22.49 | STY3267 | 3126548 | 3127633 | mltC | membrane     |
| STM1901 | 8.02  |         | 3084875 | 3085423 |      | conserved_   |
| STM4120 | 8.39  | STY0797 | 794269  | 795312  | nadA | quinolinate  |
| STM2648 | 4.7   | STYrarB | 850960  | 853104  | dinG |              |
| STM4119 | 3.86  | STY3198 | 3064471 | 3066240 | recJ | single-strar |
| STM2129 | 20.2  | STY3450 | 3293511 | 3294086 |      | possible_lip |
| STM2120 | 18.13 | STY0840 | 837455  | 837907  | moaE | molybdopte   |
| STM0670 | 8.43  | STY0891 | 885863  | 887188  | yliG | conserved_   |
| STM2316 | 6.53  | STY1737 | 1656231 | 1657253 | ttrC | tetrathionat |
| STM3827 | 20.61 | STY3411 | 3254997 | 3255296 |      | conserved_   |
| STM1959 | 35.89 |         |         |         |      |              |
| STM3200 | 12.23 | STY3231 | 3097596 | 3098270 |      | putative_m   |
| STM4114 | 9.68  | STY0882 | 873680  | 876112  | ybiW | putative_fo  |
| STM4472 | 25.49 | STY0410 | 424239  | 424547  |      | putative_m   |
| STM3308 | 25.87 | STY0488 | 493149  | 493466  | bolA | BolA_prote   |
| STM3742 | 2.98  |         |         |         |      |              |
| STM0577 | 29.3  |         |         |         |      |              |
| STM2557 | 41.45 |         |         |         |      |              |
| STM4128 | 27.38 |         |         |         |      |              |
| STM2170 | 20.33 | STY4683 | 4545555 | 4545920 | cutA | periplasmic  |
| STM2316 | 18.8  | STY4700 | 4558972 | 4559331 | frdD | fumarate_r   |
| STM2392 | 8.73  | STY3022 | 2895282 | 2895932 | invF | possible_A   |
| STM4126 | 9.04  | STY1905 | 1798246 | 1799097 | ipk  | isopentenyl  |
| STM0737 | 28.53 | STY4614 | 4486244 | 4486630 |      | phage_bas    |
| STM1769 | 23.04 | STY2319 | 2149116 | 2149595 | wcaH | putative_O   |
|         |       | STY4198 | 4063955 | 4064311 |      | phage-like_  |
|         |       | STY3482 | 3327024 | 3327281 | rpmA | 50S_ribosc   |
| STM1264 | 16.97 | STY3266 | 3126160 | 3126435 |      | conserved_   |
| STM1655 | 8.8   | STY3208 | 3073310 | 3074149 |      | hypothetica  |
| STM1378 | 47.67 | STY2096 | 1948117 | 1949559 | pykA | pyruvate_k   |
| STM3693 | 33.14 | STY1425 | 1376739 | 1377062 |      | putative_se  |
| STM3362 | 61    | STY3542 | 3382461 | 3382724 |      | conserved_   |
| PSLT096 | 12.2  | STY2264 | 2090422 | 2090757 |      | conserved_   |
|         |       | STY0320 | 330849  | 331295  |      | hypothetica  |
| STM4492 | 29.42 | STY2662 | 2499389 | 2499616 | ypeB | conserved_   |
| STM2137 | 6.14  |         |         |         |      |              |

|         |       |          |                    |         |         |               |
|---------|-------|----------|--------------------|---------|---------|---------------|
| STM0525 | 58.64 | STY2730  |                    | 2566467 | 2567660 | conserved_    |
| STM4396 | 24.22 | STY2763a |                    | 2615397 | 2615618 | conserved_    |
| STM2774 | 26.87 | STY2611  |                    | 2447067 | 2447342 | conserved_    |
| STM3625 | 30.21 | STY2638  |                    | 2473697 | 2473939 | conserved_    |
| STM2947 | 30.75 | STY1282  |                    | 1237255 | 1237485 | chaB          |
| STM3582 | 7.47  | STY0686  |                    | 682051  | 682626  | lipB          |
| STM1075 | 20.35 | STY0726  |                    | 726976  | 727308  | putative_lip  |
| STM0591 | 12.06 | STY2596  |                    | 2432374 | 2433642 | folC          |
| STM4410 | 12.86 |          |                    |         |         | folylpolyglu  |
| STM0496 | 34.3  |          |                    |         |         |               |
| STM0820 | 23.95 |          |                    |         |         |               |
| STM2984 | 14.41 |          |                    |         |         |               |
| STM2536 | 11.66 |          |                    |         |         |               |
| STM4231 | 39.06 |          |                    |         |         |               |
| STM3035 | 22.65 |          |                    |         |         |               |
| STM2435 | 54.88 |          |                    |         |         |               |
| STM3391 | 73.25 | STY0519  |                    | 522109  | 525253  | acrB          |
| STM3766 | 56.14 |          | aSTY0523           |         |         | acriflavin_r  |
| STM2007 | 48.99 |          |                    |         |         |               |
| STM2136 | 38.43 | STY0602a |                    | 605710  | 606051  |               |
| STM2777 | 55.53 | aSTY0628 |                    |         |         |               |
| STM0061 | 67.02 | aSTY0670 |                    |         |         |               |
|         |       | STY1498  |                    | 1455055 | 1455972 | hlyE          |
|         |       | STY1604  |                    | 1544282 | 1546051 | hypothetica   |
|         |       | STY1620  |                    | 1556086 | 1557039 | hypothetica   |
| STM1049 | 18.9  | STY1637  | STY1642            | 1568680 | 1569705 | bacteriophage |
| STM1820 | 3.69  | STY2004  |                    | 1883242 | 1885221 | yjcS          |
|         |       | STY2035  |                    | 1904911 | 1905852 | putative_hy   |
| STM0671 | 24.72 | STY1614  |                    | 1549845 | 1550390 | hypothetica   |
|         |       | STY1630  |                    | 1563846 | 1564730 | hypothetica   |
|         |       | STY1886  |                    | 1785388 | 1786197 | cdtB          |
| STM4202 | 6.66  | STY1070  | aSTY2016           | 1046621 | 1047820 | putative_to   |
|         |       | STY2046  |                    | 1913483 | 1913785 | hypothetica   |
| STM2625 | 60.6  | STY2062  |                    | 1922526 | 1923272 | putative_DI   |
| STM2995 | 29.29 | STY1624  |                    | 1558296 | 1558550 | hypothetica   |
| STM2053 | 8.9   | STY1665  |                    | 1593370 | 1595391 | putative_N.   |
| STM3174 | 13.59 | aSTY1071 | STY2015            | 1891515 | 1892195 | putative_ba   |
| STM0713 | 8.43  | STY2040  | aSTY1047           | 1909704 | 1911170 | putative_ba   |
|         |       | STY2056  | HCM1.194,_HCM1.24' | 1917993 | 1919210 | putative_tra  |
|         |       | STY2072  |                    | 1927122 | 1927397 | racC          |
| STM2123 | 7.92  | STY1742  |                    | 1662657 | 1663319 | putative_ba   |
|         |       | STY2017  |                    | 1893392 | 1893745 | putative_ba   |
| STM1336 | 14.31 | STY2033  |                    | 1904128 | 1904535 | putative_ba   |
| STM2086 | 43.47 | STY3278  |                    | 3134156 | 3134344 | hypothetica   |
| STM2633 | 19.8  | STY2074  |                    | 1930637 | 1931689 | conserved_    |
| STM4522 | 14.1  | STY2352  |                    | 2189768 | 2190217 | hypothetica   |
| STM4552 | 6.88  | STY4599  |                    | 4473973 | 4474350 | hypothetica   |
| STM2347 | 36.83 | aSTY4639 |                    |         |         |               |
|         |       | STY4546  |                    | 4430822 | 4431907 | pilR          |
| STM2360 | 14.99 | STY4565  |                    | 4445457 | 4445696 | putative_m    |
|         |       | STY4583  |                    | 4459393 | 4460640 | conserved_    |

|         |       |         |         |         |                    |
|---------|-------|---------|---------|---------|--------------------|
| STM4415 | 27.6  | STY4600 | 4474437 | 4474655 | putative_pc        |
| STM4262 | 37.56 | STY4834 | 4694997 | 4695146 | hypothetica        |
| STM2342 | 11.47 | STY4922 | 4782631 | 4783116 | yafM conserved_    |
| STM3812 | 30.1  | STY4480 | 4366676 | 4367188 | cytochrome         |
|         |       | STY4543 | 4427237 | 4428532 | pilO putative_pi   |
| STM1963 | 3.66  | STY4756 | 4613286 | 4614674 | putative_e         |
| STM2769 | 93.2  | STY4835 | 4695457 | 4696511 |                    |
| STM4230 | 30.74 | STY0194 | 204369  | 205295  | yadG hypothetica   |
|         |       | STY0252 | 264665  | 265813  | lpxB lipid-A-disa  |
| STM2445 | 23.52 | STY1550 | 1502840 | 1503586 | putative_o         |
| STM3177 | 56.29 | STY4491 | 4378837 | 4379550 | pmrA two-compo     |
| STM4174 | 21.39 | STY2633 | 2467198 | 2468445 | pgtA phosphogly    |
| STM3478 | 13.39 | STY3906 | 3768665 | 3769045 | atpI ATP_synth     |
| STM0449 | 30.76 | STY3565 | 3409864 | 3410160 | fis Fis_DNA-b      |
| STM2034 | 17.9  | STY2239 | 2068041 | 2069000 | cbiB CbiB_prote    |
| STM3274 | 18.87 | STY2221 | 2055871 | 2056416 | cobU cobinamide    |
| STM0621 | 64.9  | STY0070 | 70876   | 72396   | citF2 citrate_lyas |
| STM2461 | 10.17 | STY3484 | 3327871 | 3328842 | ispB octaprenyl-   |
| STM1478 | 14.12 |         |         |         |                    |
| STM1187 | 42.41 | STY0110 | 109129  | 109788  | rluA ribosomal_    |
| STM3064 | 2.62  | STY0175 | 179387  | 182050  | aceE pyruvate_d    |
| STM3865 | 12.25 |         |         |         |                    |
| STM0208 | 7.47  | STY0230 | 239853  | 241370  | dgt deoxyguan      |
| STM2597 | 20.96 | STY0265 | 278825  | 279247  | yaeJ putative_re   |
| STM4519 | 51.34 |         | 1490098 | 1491225 | putative_al        |
| STM3391 | 6.62  | STY0699 | 693874  | 696456  | leuS leucyl-tRN/   |
| STM3216 | 10.21 |         |         |         |                    |
|         |       | STY0756 | 757169  | 757735  | probable_[]        |
|         |       | STY4905 | 4766926 | 4767162 | conserved_         |
| STM0598 | 17.92 | STY4620 | 4489020 | 4489490 | nucD2 putative_ly: |
| STM2374 | 43.55 |         |         |         |                    |
| STM2928 | 4.57  | STY4914 | 4773475 | 4774548 | conserved_         |
| STM0175 | 50.79 | STY4941 | 4801127 | 4803660 | sthC               |
| STM2767 | 14.34 |         |         |         |                    |
| STM2043 | 56.66 |         |         |         |                    |
| STM2299 | 9.09  |         |         |         |                    |
| STM2191 | 5.7   | STY4690 | 4551605 | 4553251 | groEL GroEL_pro    |
| STM3277 | 38.37 | STY0357 | 366107  | 366847  | yafK putative_e    |
| STM0921 | 68.5  |         |         |         |                    |
|         |       | STY1102 | 1079407 | 1079724 | conserved_         |
| STM3190 | 16.73 | STY1157 | 1116598 | 1117236 | putative_tra       |
| STM3302 | 12.12 | STY1194 | 1155136 | 1155711 | putative_e         |
| STM2533 | 24.18 | STY1245 | 1200068 | 1200427 | putative_pr        |
| STM0792 | 47.56 | STY1104 | 1081208 | 1081755 |                    |
| STM2556 | 42.91 | STY4397 | 4256233 | 4256490 | yrdB conserved_    |
| STM1679 | 39.44 | STY4342 | 4222304 | 4222504 | yheV conserved_    |
| STM0190 | 8.04  | STY4303 | 4181390 | 4183966 | mrcA penicillin-bi |
| STM3801 | 52.15 | STY4270 | 4134413 | 4135753 | gntU low-affinity_ |
| STM1499 | 60.72 | STY0962 | 955837  | 958281  | dmsA anaerobic_    |
| STM3208 | 9.27  | STY3865 | 3721752 | 3722360 | hypothetica        |
| STM4189 | 10.66 | STY3795 | 3659355 | 3660398 | putative_AI        |

|         |       |         |           |         |                             |
|---------|-------|---------|-----------|---------|-----------------------------|
| STM3066 | 13.15 |         |           |         |                             |
| STM2562 | 26.68 | STY2981 |           | 2856596 | 2858674 fhIA transcriptio   |
|         |       |         | STY3042   | 2910026 | 2910700                     |
| STM3529 | 48.36 | STY3759 |           | 3619808 | 3620911 gldA glycerol_de    |
| STM0734 | 18.64 | STY2972 |           | 2848511 | 2849434 hycD formate_hy     |
| STM0652 | 13.45 |         | STY3032;_ | 2900260 | 2900586 hypothetica         |
| STM3771 | 10.96 |         |           |         |                             |
| STM2414 | 26.85 | STY2652 |           | 2489963 | 2490325 yfeC conserved_     |
| STM1766 | 20.68 | STY2718 |           | 2551867 | 2553567 narQ nitrate/nitrit |
| STM2614 | 97.9  |         |           |         |                             |
| STM1712 | 12.26 | STY3785 |           | 3651108 | 3652208 glpX putative_gl    |
| STM3858 | 47.13 |         |           |         |                             |
| STM4455 | 15.49 | STY4486 |           | 4374136 | 4374600 phnO putative_ac    |
| STM0029 | 15.55 |         |           |         |                             |
| STM1913 | 14.04 | STY2658 |           | 2495466 | 2496299 xapA xanthosine     |
| STM0848 | 19.37 | STY1862 |           | 1770641 | 1771438 putative_Al         |
| STM0600 | 8.18  | STY1588 |           | 1534318 | 1535760 pntB pyridine_nu    |
| STM2515 | 10.7  |         | aSTY2756  |         |                             |
| STM0545 | 48.06 | STY0025 |           | 25116   | 25802 bcfB fimbrial_ch      |
| STM2668 | 13.07 | STY4729 |           | 4592158 | 4592841 yjfk conserved_     |
| STM4446 | 3.75  | STY4768 |           | 4625159 | 4626892 ytfM putative_e)    |
| STM0739 | 9.31  | STY4775 |           | 4635777 | 4637150 mpl murein_pej      |
| STM2290 | 24.13 | STY2501 |           | 2335636 | 2336961                     |
| STM3773 | 3.1   |         |           |         |                             |
| STM0866 | 49.56 | STY4874 |           | 4735982 | 4737223 putative_su         |
| STM3545 | 9.72  | STY1170 |           | 1133023 | 1134126 putative_o)         |
| STM0775 | 16.47 | STY1777 |           | 1698011 | 1698553 infC translation_   |
| STM0400 | 41.83 | STY2587 |           | 2422315 | 2423640 putative_ar         |
| STM0849 | 6.15  | STY1865 |           | 1773208 | 1774842 putative_su         |
| STM2689 | 14.4  |         |           |         |                             |
| STM0567 | 13.64 | STY1190 |           | 1151067 | 1151441 msyB acidic_prot    |
| STM4581 | 15.28 | STY1835 |           | 1755011 | 1755538 conserved_          |
| STM0011 | 7.81  | STY1695 |           | 1621347 | 1622495 cfa cyclopropa      |
|         |       | STY1198 |           | 1156697 | 1157815 solA putative_sa    |
| STM3598 | 16.14 | STY1820 |           | 1740439 | 1741455 ansA L-Asparagi     |
| PSLT011 | 38.91 | STY3883 |           | 3740516 | 3741139 dsbA thiol:disulfic |
| STM4410 | 28.06 | STY1802 |           | 1721748 | 1722089 osmE osmotically    |
| STM2586 | 50.18 |         |           |         |                             |
|         |       | STY1673 |           | 1601969 | 1603243 tyrS tyrosyl-tRN    |
| STM2984 | 52.47 | STY1750 |           | 1669043 | 1670263 putative_ar         |
| STM3593 | 12.84 | STY1209 |           | 1165319 | 1166812 mviN virulence_f    |
| STM1494 | 21.73 | STY1704 |           | 1629358 | 1629735 ssaO putative_ty    |
|         |       | STY3905 |           | 3767428 | 3768051 gidB glucose_inl    |
| STM0973 | 43.58 | STY2839 |           | 2701506 | 2701889 yfiD conserved_     |
| STM1210 | 6.93  | STY0261 |           | 276262  | 277554 mesJ cell_cycle_     |
| STM1806 | 5.26  | STY0439 |           | 448389  | 450206 malZ maltodextri     |
| STM1771 | 15.17 | STY4406 |           | 4274669 | 4276300 yjbB putative_m     |
| STM0493 | 3.45  | STY4471 |           | 4356633 | 4358282 Sodium:sol          |
| STM3594 | 9.49  | STY1808 |           | 1725993 | 1727336 astB succinylarg    |
| STM4230 | 5.95  | STY1765 |           | 1687672 | 1689114 conserved_          |
| STM0646 | 10.96 | STY1683 |           | 1610761 | 1611657 putative_o)         |
| STM2525 | 9.79  |         |           |         |                             |

|         |       |         |                   |         |      |               |
|---------|-------|---------|-------------------|---------|------|---------------|
| STM3922 | 28.18 | STY2307 | 2135484           | 2136569 | rfbB | dTDP-gluc     |
| STM3002 | 11.33 | STY2817 | 2680666           | 2681559 |      | putative_ph   |
| STM3738 | 40.95 | STY0227 | 237617            | 238240  | yadS | putative_m    |
| STM1353 | 58.8  | STY0086 | 89287             | 90228   | fixB | FixB_prote    |
| STM3594 | 16.49 | STY0169 | 173061            | 173915  | ampE | AmpE_proi     |
| STM0760 | 5.69  | STY4190 | 4053367           | 4054854 | yhjJ | putative_zii  |
| STM2837 | 43.88 | STY4280 | 4150139           | 4150897 | glpR | glycerol-3-ph |
| STM0158 | 6.17  | STY2535 | 2369264           | 2370631 | menE | O-succinyl    |
| STM1303 | 14.25 | STY2765 | 2617298           | 2618476 |      | putative_lip  |
| STM1642 | 14.96 |         | 4191069           | 4191905 |      | hypothetica   |
| STM4205 | 71.77 | STY0606 | 459365            | 459691  |      | bactoprenc    |
| STM1646 | 18.02 | STY4924 | 608393            | 609319  | gtrB | putative_m    |
| STM2843 | 47.51 | STY4132 | 4784257           | 4784910 | smf  | putative_el   |
| STM3522 | 8.44  | STY4199 | 3994378           | 3994851 |      | putative_m    |
| STM3961 | 12.82 | STY4302 | 4064592           | 4066181 |      | putative_Ni   |
| STM2274 | 24.82 | STY2520 | 4180698           | 4181294 | yrfE | putative_tr   |
| STM3747 | 11.73 | STY2738 | 2354466           | 2355755 |      | uracil_pern   |
| STM3242 | 39.41 | STY2567 | 2574372           | 2575661 | uraA | acetate_kir   |
| STM2625 | 100   | STY1023 | 2402961           | 2404163 | ackA | putative_DI   |
| STM4466 | 23.38 | STY0580 | 1017163           | 1017912 |      | carbamate,    |
| STM2119 | 17.05 | STY4766 | 588325            | 589218  | arcC | putative_m    |
| STM1538 | 21.04 |         | 4622761           | 4624140 | ytfL |               |
|         |       | STY3356 | 3200413           | 3200993 |      |               |
| STM2730 | 38.76 | STY4312 | 4191069           | 4191905 | dam  | DNA_aden      |
| STM3685 | 21.71 | STY2442 | 2272582           | 2273712 | fruB | pts_system    |
| STM2808 | 11.17 | STY2507 | 2341458           | 2342588 | nrdB | ribonucleos   |
|         |       | STY2693 | 2525882           | 2526541 | eutL | ethanolami    |
| STM3241 | 18.38 | STY3790 | 3655255           | 3656019 |      | putative_rit  |
|         |       | STY0733 | 733795            | 734088  | ybfE | conserved_    |
| STM1654 | 8.14  | STY1882 | 1783564           | 1784085 | envE | putative_lip  |
| STM0802 | 9.62  | STY3009 | 2882898           | 2883395 | spaT | unknown_f     |
| STM2187 | 6.68  | STY3884 | 3741156           | 3742142 | yihE | conserved_    |
| STM2459 | 18.67 | STY0893 | 887419            | 887802  |      | conserved_    |
| STM2383 | 9.04  | STY4333 | 4214765           | 4215634 | prkB | phosphorib    |
| STM0516 | 44.74 | STY4404 | 4269601           | 4270425 | iclR | acetate_op    |
| STM3165 | 35.72 | STY1388 | 1340834           | 1341703 |      | putative_o    |
| STM0960 | 8.7   | STY4382 | 4244566           | 4245186 | rpsD | 30S_ribosc    |
| STM3222 | 28.78 | STY2414 | 2245810           | 2246529 | sanA | vancomycii    |
| STM0498 | 8.85  | STY1320 | 1277897           | 1278775 |      | conserved_    |
| STM4304 | 5.87  | STY3712 | 3562701           | 3564098 | hydH | two-compo     |
| STM2506 | 58.62 | STY2746 | 2584818           | 2585078 |      | hypothetica   |
| STM2432 | 28.88 | STY3144 | 3016154           | 3018400 | ptsP | phosphoen     |
| STM2890 | 42.83 |         | aSTY3013; STY3014 |         |      |               |
| STM4305 | 5.65  | STY2271 | 2095447           | 2097723 | phsA | thiosulfate   |
| STM2040 | 17.89 | STY3544 | 3383154           | 3383426 |      | conserved     |
| STM0847 | 7.1   | STY0016 | 16499             | 17032   |      | conserved     |
| STM3941 | 27.59 | STY0609 | 610081            | 610326  |      | possible cc   |
| STM3201 | 22.63 | STY0056 | 56686             | 57186   | lspA | lipoprotein   |
|         |       | STY0755 | 756978            | 757109  |      | hypothetica   |
| STM1635 | 13.79 | STY1398 | 1350926           | 1351264 |      | hypothetica   |
| STM4017 | 65.92 | STY3860 | 3716708           | 3718090 | yihP | putative me   |
| STM0054 | 4.43  | STY2649 | 2484329           | 2485570 | mntH | manganese     |



|         |       |          |         |         |      |                  |
|---------|-------|----------|---------|---------|------|------------------|
| STM3882 | 23.14 | STY2422  | 2251323 | 2252841 | mgIA |                  |
| STM1542 | 2.23  | STY1758  | 1676888 | 1679944 |      | conserved        |
| STM1578 | 75.7  | STY1289  | 1247824 | 1249359 | narH | respiratory      |
| STM2563 | 10.69 | STY1926  | 1818871 | 1819605 |      | conserved        |
| STM1817 | 11.01 | STY3165  | 3037910 | 3038773 |      | possible re      |
| STM3827 | 41.55 | STY3100  | 2968776 | 2970134 | ygCZ | probable gl      |
| STM0421 | 23.95 | STY3151  | 3021796 | 3022836 |      | possible ox      |
| STM3058 | 6.64  | STY3576  | 3426483 | 3427814 | pepQ | proline dipe     |
| STM4326 | 10.04 | STY4271  | 4136176 | 4137282 | asd  | aspartate-s      |
| STM2831 | 9.74  | STY0107  | 104274  | 105560  | surA | survival prc     |
| STM2097 | 28.84 | STY3633  | 3488883 | 3489950 | rffG | UDP-N-ace        |
| STM4437 | 7.15  | STY3654  | 3511753 | 3512682 | ilvE | branched-c       |
| STM2098 | 59.01 | STY1298  | 1256963 | 1257871 | galU | glucose-1- $\mu$ |
| STM2384 | 1.94  | STY3732  | 3581277 | 3585337 | rpoB | DNA-direct       |
| STM1787 | 33.22 | STY1937  | 1830754 | 1831095 |      | conserved        |
| STM0337 | 7.27  | STY0120  | 121005  | 122714  | araB | L-ribulokin      |
| STM0850 | 38.54 | STY1305  | 1266224 | 1267144 | oppB | oligopeptid      |
|         |       | STY2396  | 2226756 | 2229053 | bgIX | periplasmic      |
| STM4098 | 39.95 | aSTY3579 |         |         |      |                  |
| STM0028 | 15.23 | STY0641  | 643182  | 644039  | entB | isochorism       |
|         |       | STY1341  | 1301795 | 1302559 | pgpB | phosphatid       |
| STM3504 | 14.65 | STY1295  | 1254184 | 1254642 |      |                  |
| STM4456 | 25.26 |          |         |         |      |                  |
| STM1150 | 29.16 | STY1442  | 1394233 | 1395858 |      | putative ex      |
| STM3152 | 39.66 | STY1408  | 1358082 | 1359236 |      | putative ch      |
| STM0294 | 9.44  | STY1392  | 1343754 | 1345052 |      | hypothetica      |
| STM0975 | 11.63 | STY0534  | 540899  | 541870  | aes  | acetyl ester     |
| STM0060 | 61.57 | STY0671  | 670133  | 671041  | citE | citrate lyas     |
| STM0149 | 53.35 | STY4043  | 3900832 | 3902214 | yicJ | sodium:gal       |
|         |       | STY1484  | 1437212 | 1438150 |      | conserved        |
| STM3492 | 10.23 | STY1334  | 1291577 | 1292623 |      | putative pro     |
| STM2035 | 11.26 | STY1457  | 1407487 | 1408155 |      | putative lip     |
| STM1594 | 14.63 | STY1502  | 1457973 | 1458758 |      | putative se      |
| STM0747 | 7.85  |          | 1424467 | 1425666 | srfA | putative vir     |
| STM2372 | 17.08 | STY1445  | 1397817 | 1398335 | aac  | aminoglyccc      |
| STM1801 | 6.26  | STY2089  | 1941304 | 1942482 | purT | phosphorib       |
| STM2554 | 5.1   | STY1351  | 1311666 | 1312586 |      | conserved        |
| STM1781 | 4.86  | STY1343  | 1303024 | 1304193 |      | conserved        |
| STM3571 | 14.85 | STY2864  | 2733112 | 2734473 | ffh  | signal reco      |
| STM1043 | 19.51 | STY3179  | 3050045 | 3050581 |      | outer mem        |
| STM1542 | 34.37 |          |         |         |      |                  |
| STM2565 | 14.79 | STY0472  | 478436  | 479026  | thiJ | 4-methyl-5i      |
| STM3962 | 47.37 | STY0499  | 506380  | 507198  |      | conserved        |
| STM4325 | 21.09 |          |         |         |      |                  |
| STM4467 | 24.28 | STY3206  | 3071359 | 3071670 |      | conserved        |
| STM2206 | 12.87 | STY4111  | 3970915 | 3972831 | mtIA | mannitol-s $\mu$ |
| STM0889 | 16.63 | STY4007  | 3869661 | 3870046 |      |                  |
| STM3853 | 7.21  | STY3116  | 2983758 | 2985488 | fucl | L-fuculose       |
| STM1520 | 7.89  | STY3172  | 3042198 | 3042956 |      | hypothetica      |
| STM0494 | 5.38  | STY3313  | 3161965 | 3163017 |      | possible Af      |
| STM1796 | 51.42 | STY4200  | 4066194 | 4067843 | treF | cytoplasmic      |
| STM4004 | 15.97 | STY3257  | 3118798 | 3119934 |      | possible ox      |

|         |       |          |         |         |         |              |
|---------|-------|----------|---------|---------|---------|--------------|
| STM0151 | 37.74 | STY4103  | 3960797 | 3961573 | lctR    | putative L-l |
| STM3253 | 20.32 | STY4003  | 3868106 | 3868966 |         |              |
| STM2667 | 4.4   | STY2855  | 2725258 | 2726166 |         | conserved    |
| STM1390 | 52.83 | STY2390  | 2221950 | 2222681 | yehV    | putative tra |
| STM0293 | 3.7   | STY2291  | 2117712 | 2119142 | rfbP    | undecaprei   |
| STM3399 | 20.05 | STY2327  | 2155436 | 2155924 | wcaB    | putative ac  |
| STM4324 | 12.5  | STY2400  | 2232941 | 2233537 | yohD    | putative me  |
| STM0025 | 14.22 | STY4393  | 4253794 | 4254267 | smg     | conserved    |
| STM1677 | 36.96 | STY4196  | 4061817 | 4062719 | yhjC    | hypothetica  |
|         |       | STY1941  | 1832021 | 1832482 |         | conserved    |
| STM2370 | 16.98 | STY4156  | 4014615 | 4015589 | viaE    | putative 2-l |
| STM3506 | 11.56 | STY4262  | 4126290 | 4127261 |         | putative me  |
| STM3493 | 20.65 | STY3505  | 3343409 | 3344137 | mtgA    | monofuncti   |
| STM2253 | 17.12 | STY4818  | 4679542 | 4680624 |         | putative inr |
| STM3583 | 9.53  | STY4681  | 4543264 | 4543839 | yjdC    | putative tra |
| STM4438 | 23.16 | STY3488  | 3331176 | 3331472 |         | possible ar  |
| STM3905 | 29.79 | STY3427  | 3268890 | 3269879 | tdcB    | catabolic th |
| STM1536 | 48.16 | STY3317  | 3164184 | 3164678 | hybD    | hydrogenas   |
| STM2171 | 24.41 | STY2956  | 2833113 | 2833892 | srlD    | sorbitol-6-p |
| STM0903 | 30.49 |          |         |         |         |              |
| PSLT061 | 14.16 |          | STY2429 | 2258645 | 2259034 | putative DN  |
| STM3788 | 50.97 | STY2432  | 2261543 | 2262865 |         |              |
| STM3343 | 14.89 |          |         |         |         |              |
| STM1326 | 27.89 | STY2441  | 2271644 | 2272582 | fruK    | 1-phosphol   |
|         |       | STY4394  | 4254294 | 4254836 | yrdD    | conserved    |
| STM0796 | 8.68  | STY4364  | 4236359 | 4237060 | rpsC    | 30S riboso   |
| PSLT105 | 72.4  | STY3182  | 3051388 | 3051786 |         | hypothetica  |
| STM2403 | 11.61 | STY0907  | 900194  | 900916  | nfsA    | oxygen-ins   |
| STM1975 | 7.07  | STY3377  | 3217282 | 3217902 |         | putative me  |
| STM3016 | 46.26 | STY3244  | 3109024 | 3110418 | galP    | galactose-p  |
| STM2683 | 21.82 | STY1101  | 1078946 | 1079362 |         | conserved    |
| STM4232 | 18.64 | STY0838  | 836730  | 837215  | moaC    | molybdenu    |
| STM1745 | 38.29 | STY0889  | 883938  | 884858  | yliC    | hypothetica  |
| STM0194 | 3.84  | STY1121  | 1088687 | 1090372 | sigD    | cell invasio |
| STM3159 | 19.12 | STY0791  | 788215  | 788907  | tolQ    | TolQ protei  |
| STM3704 | 12.28 | STY0827  | 824766  | 825806  | bioB    | biotin synth |
| STM0736 | 8.01  | STY0880  | 871266  | 872531  |         | conserved    |
| STM2479 | 65.51 | STY3511  | 3353514 | 3354932 | gltD    | glutamate :  |
| STM2513 | 6.43  | STY4030  | 3891261 | 3894130 | misL    |              |
| STM3321 | 41.87 | STY2853  | 2723548 | 2723886 | yfiA    | putative sig |
|         |       | STY2619  | 2452380 | 2452865 |         | phosphohis   |
| STM1695 | 25.94 | STY4436  | 4306612 | 4306824 |         | conserved    |
|         |       | STY4383  | 4245212 | 4246201 | rpoA    | DNA-direct   |
| STM3630 | 48.84 | STY1369  | 1324462 | 1326111 | sapA    | peptide trai |
| STM2561 | 70.32 | STY0506  | 513385  | 513723  | glnK    | nitrogen re  |
| STM4359 | 25.65 | STY3832  | 3691934 | 3692500 |         | putative DN  |
|         |       | STY0761  | 761332  | 762465  |         | galactosyltr |
| STM0651 | 54.92 | STY3739a | 3591183 | 3591356 |         | hypothetica  |
| STM2393 | 19.57 |          |         |         |         |              |
| STM2629 | 99.2  |          |         |         |         |              |
| STM0559 | 67.5  |          |         |         |         |              |

aSTY4627 aSTY3675

|         |       |                   |          |         |         |      |               |
|---------|-------|-------------------|----------|---------|---------|------|---------------|
| STM3905 | 39.82 | STY2088           |          | 1940883 | 1941173 | yebG | conserved     |
| STM2714 | 53.33 |                   |          |         |         |      |               |
| STM0925 | 26.05 |                   |          |         |         |      |               |
| STM0435 | 30.85 | STY3782           |          | 3648077 | 3648316 | yiiU | conserved     |
|         |       | STY3056           |          | 2921045 | 2921356 |      | conserved     |
| STM1377 | 75.81 | STY1746           |          | 1667153 | 1667392 | lppB | major outer   |
| STM4377 | 29.13 | STY1756           |          | 1676194 | 1676421 |      | conserved     |
| STM4116 | 30.8  |                   | STY1675  | 1604160 | 1604414 | ydhA | putative lipi |
| STM1241 | 64.1  | STY1077           |          | 1052477 | 1052755 |      | conserved     |
| STM4243 | 25.48 | STY2701           |          | 2535026 | 2535715 | eutN | putative etf  |
| STM3664 | 25.76 | STY0182           |          | 191791  | 192153  |      | conserved     |
| STM0520 | 30.41 |                   | STY4408  | 4277151 | 4277252 |      | hypothetica   |
| STM1422 | 18.5  | STY1988           |          | 1875015 | 1875410 |      | conserved     |
| STM1185 | 16.73 | STY1962           |          | 1852881 | 1853339 |      | putative me   |
| STM3043 | 28.13 | STY2081           |          | 1935179 | 1935559 |      | putative ca   |
| STM4477 | 20.51 | STY1043           |          | 1027078 | 1027617 |      | putative se   |
| STM1139 | 46.25 | STY2135           |          | 1987711 | 1987827 |      | hypothetica   |
| PSLT021 | 99.02 |                   |          |         |         |      |               |
| STM3051 | 4.26  |                   |          |         |         |      |               |
| PSLT059 | 92.25 |                   |          |         |         |      |               |
| STM0718 | 27.36 |                   |          |         |         |      |               |
| STM2875 | 15.88 |                   |          |         |         |      |               |
| STM1124 | 38.17 |                   |          |         |         |      |               |
| STM3012 | 7.65  |                   |          |         |         |      |               |
| STM1411 | 11.86 |                   |          |         |         |      |               |
| STM0863 | 51.78 | aSTY0688          |          |         |         |      |               |
| STM0655 | 62.4  |                   |          |         |         |      |               |
| STM1792 | 60.1  | aSTY0786          |          |         |         |      |               |
| STM0914 | 67.85 |                   |          |         |         |      |               |
| STM4116 | 38.02 |                   |          |         |         |      |               |
| STM4146 | 40.68 | aSTY2839          |          |         |         |      |               |
|         |       | STY3071           |          | 2932897 | 2935104 |      | conserved     |
|         |       | STY2060           |          | 1921304 | 1921726 |      | hypothetica   |
| STM3256 | 13.12 | STY2076           |          | 1932235 | 1932516 |      | putative ex   |
| STM3938 | 4.44  | STY3677           | aSTY4625 | 3530722 | 3531780 |      | major caps    |
| STM3548 | 22.28 | STY3693           |          | 3540251 | 3540691 |      | conserved     |
|         |       | STY3949           |          | 3817167 | 3818306 |      | hypothetica   |
| STM1835 | 6.48  | STY3344           |          | 3187993 | 3189417 |      | putative me   |
| STM4453 | 23.68 | STY3663           |          | 3518551 | 3518775 |      | hypothetica   |
| STM0256 | 10.8  | STY3679           |          | 3532467 | 3532994 |      | putative ca   |
| STM4533 | 6.87  | aSTY2888 aSTY3696 |          |         |         |      |               |
| STM3545 | 5.87  | STY4036           |          | 3896540 | 3897523 |      | putative DN   |
| STM1542 | 32.26 | STY1555           |          | 1507896 | 1508759 | rspB | starvation s  |
| STM0370 | 13.05 | STY3645           |          | 3503465 | 3503893 |      | hypothetica   |
| STM1202 | 7.4   | STY3673           |          | 3526151 | 3526891 |      | hypothetica   |
| STM1970 | 8.33  | STY3689           | aSTY4613 | 3536669 | 3537577 |      | phage base    |
| STM0545 | 31.34 | STY3919           |          | 3781269 | 3781967 | stgB | fimbrial cha  |
| STM3650 | 15.8  | STY0300           |          | 314246  | 314647  |      | hypothetica   |

|         |       |          |          |         |         |      |              |
|---------|-------|----------|----------|---------|---------|------|--------------|
|         |       | STY0346  |          | 352525  | 353100  | tcfB | putative fir |
| STM2811 | 2.26  | STY3675  | aSTY4627 | 3527963 | 3529729 |      | terminase,   |
| STM0038 | 7.84  | STY2882  | STY3702  | 2761219 | 2762319 |      | putative ba  |
| STM1192 | 11.86 | STY3069  |          | 2930385 | 2930987 |      | hypothetica  |
| STM2188 | 8.46  | STY0306  |          | 319019  | 319768  |      | putative me  |
| STM4325 | 4.26  | STY0348  |          | 355919  | 356998  | tcfD | putative fir |
| STM3051 | 8.06  | STY1016  |          | 1012638 | 1013318 | exo  | exonucleas   |
|         |       | aSTY4142 |          |         |         |      |              |
| STM3523 | 16.69 | STY4412  |          | 4279074 | 4279832 |      | deoR famil   |
|         |       | STY4547  |          | 4431907 | 4432542 | pilS | prepilin     |
|         |       | STY4823  |          | 4686254 | 4687327 |      | protein kin  |
| STM2922 | 24.85 | STY4843  |          | 4702910 | 4703260 |      | putative ge  |
| STM0698 | 10.2  | STY4143  |          | 4006109 | 4007020 | glyQ | glycine-tRN  |
| STM0740 | 13.57 | STY4588  |          | 4465327 | 4465707 |      | hypothetica  |
| STM4258 | 10.28 | STY4207  |          | 4072647 | 4073138 |      | putative me  |
| STM2105 | 21.17 | STY4512  |          | 4404478 | 4404861 |      | hypothetica  |
| STM0309 | 22.31 | STY4667  |          | 4530221 | 4530514 |      | hypothetica  |
| STM3218 | 33.31 | STY4810  |          | 4670244 | 4670399 |      | hypothetica  |
| STM3639 | 21.77 | STY4837  |          | 4697576 | 4698328 | sefB | fimbrial cha |
| STM1189 | 23.77 | STY3551  |          | 3394908 | 3395510 | yhdE | conserved    |
| STM0655 | 49.14 |          |          |         |         |      |              |
| STM2106 | 9.06  | STY0729  |          | 729838  | 731241  |      | conserved    |
| STM3644 | 10.66 | STY3956  |          | 3825362 | 3827914 | torA | trimethylar  |
| STM4052 | 56.88 |          |          |         |         |      |              |
| STM0511 | 34.81 | STY2223  |          | 2057930 | 2058745 | cbiO | putative co  |
| STM2281 | 10.81 | STY3944  |          | 3811353 | 3812261 |      | putative Ly  |
| STM2862 | 8.96  | STY3926  |          | 3789843 | 3790883 | pstS | periplasmic  |
| STM2283 | 42.61 | STY3995  |          | 3861225 | 3862616 | uhpT | hexosepho    |
| STM4418 | 7.08  |          | STY0089  | 91996   | 93159   | yaaU | putative me  |
| STM3807 | 13.64 | STY0149  |          | 152557  | 154032  | murC | UDP-N-ace    |
| STM0091 | 29.99 | STY0185  |          | 194599  | 195582  |      | PdxA-like p  |
| STM0084 | 7     | STY0140  |          | 141821  | 142762  | yabC | conserved    |
| STM2894 | 25.89 | STY3525  |          | 3366425 | 3366853 | rplM | 50S riboso   |
| STM4290 | 5.56  | STY3560  |          | 3404179 | 3405528 | accC | biotin carb  |
| STM2073 | 11.87 | STY0695  |          | 690526  | 691620  | cobD | putative an  |
| STM2354 | 13.35 | STY0710  |          | 705590  | 706516  | ybeJ | ABC transp   |
| STM0242 | 8.24  | STY0736  |          | 735744  | 737384  | pgm  | phosphogl    |
|         |       | STY0250  |          | 263418  | 263873  | fabZ | (3R)-hydro   |
| STM4092 | 53.09 | STY1552  |          | 1504583 | 1504786 |      | conserved    |
| STM1752 | 60.39 | STY2308  |          | 2136946 | 2137839 | galF | UTP-gluc     |
| STM0456 | 8.53  | STY2338  |          | 2170454 | 2171806 | yegD | conserved    |
| STM3165 | 49.24 | STY0276  |          | 292894  | 293697  | yafB | hypothetica  |
| STM0176 | 21.69 | STY0335  |          | 342869  | 343609  | safB | periplasmic  |
| STM3887 | 48.34 | STY2342  |          | 2179688 | 2181100 | yegB | putative tra |
| STM0843 | 10.66 | STY4624  |          | 4490490 | 4491140 |      | putative ph  |
| STM2834 | 46.19 |          |          |         |         |      |              |
| STM0722 | 7.57  |          |          |         |         |      |              |
| STM2559 | 11.86 | STY2915  |          | 2798046 | 2798495 | ygaU |              |
| STM1591 | 5.69  |          | STY1131  | 1096182 | 1097489 | hpaB | 4-hydroxyp   |
| PSLT075 | 4.63  |          |          |         |         |      |              |
|         |       |          | aSTY2906 |         |         |      |              |
| STM2761 | 22.13 |          |          |         |         |      |              |

|         |       |         |            |         |         |                   |
|---------|-------|---------|------------|---------|---------|-------------------|
| STM1528 | 44.46 | STY4379 | 4243507    | 4243623 | rpmJ    | 50S riboso        |
| STM4438 | 17.22 | STY4331 | 4213325    | 4213957 | crp     | cyclic AMP        |
| STM0194 | 6.4   | STY4297 | 4174408    | 4176117 | yhgE    | putative me       |
|         |       | STY1126 | 1091094    | 1092563 | pipD    | putative se       |
| STM1887 | 9.86  | STY1163 | 1125366    | 1126247 |         | putative tra      |
| STM2972 | 31.28 | STY1199 | 1157928    | 1158185 |         | conserved         |
| STM0417 | 20.51 | STY1247 | 1200818    | 1201456 |         | putative lipi     |
| STM3785 | 11.26 | STY1893 | 1789728    | 1790852 |         | putative ba       |
| STM0074 | 13.48 | STY1838 | 1755842    | 1756288 |         | putative me       |
|         |       | STY0980 | 975505     | 976188  | cmk     | cytidylate k      |
| STM2597 | 68.01 |         |            |         |         |                   |
| STM0644 | 3.3   |         |            |         |         |                   |
|         |       | STY4441 | 4310667    | 4311650 | qor     | quinone ox        |
|         |       | STY4481 | 4367185    | 4367805 | nrfG    | NrfG protei       |
| STM4427 | 14.15 | STY3053 | 2918791    | 2919840 |         | conserved         |
| PSLT108 | 12.01 | STY4419 | 4287685    | 4288323 |         | putative lipi     |
| STM4125 | 42.22 | STY4468 | 4354511    | 4355398 |         | lysR family       |
| STM0965 | 59.75 | STY4506 | 4399438    | 4400061 | dmsB    |                   |
| STM1197 | 38.51 | STY2609 | 2443641    | 2444855 | fabB    | 3-oxoacyl-[       |
| STM1450 | 38.21 | STY2672 | 2508373    | 2509239 | pdxK    | pyridoxine        |
| STM1044 | 60.02 |         |            |         |         |                   |
| STM1108 | 13.77 | STY3843 | 3702122    | 3703051 | fdhE    | FdhE prote        |
| STM1717 | 4.5   |         |            |         |         |                   |
|         |       | STY4431 | 4301303    | 4303723 | plsB    | glycerol-3- $\mu$ |
| STM3367 | 30.17 | STY3037 | 2905042    | 2905974 |         | possible Ly       |
| STM4496 | 23.96 | STY3078 | 2942228    | 2943025 |         | Similar to h      |
| STM1991 | 6.5   |         |            |         |         |                   |
| STM3528 | 11.05 | STY1798 | 1718435    | 1719277 | celD    | putative ce       |
| STM2338 | 25.94 | STY2702 | 2535756    | 2536772 | eutD    | putative ph       |
| STM0912 | 4.16  | STY1272 | 1228972    | 1230342 | purB    | adenylosuc        |
| STM2214 | 9.99  | STY1690 | 1615756    | 1616610 |         | putative se       |
|         |       |         | STY2175    | 2019141 | 2019494 | putative ex       |
| STM2144 | 16.02 | STY2482 | 2311246    | 2311695 | napB    | cytochrome        |
| STM3767 | 53.95 | STY4786 | 4644777    | 4645517 |         | hypothetica       |
| STM1458 | 12.41 | STY2551 | 2385388    | 2385930 | nuoI    | NADH deh;         |
| STM3949 | 13.02 | STY2578 | 2414648    | 2415292 |         | putative glu      |
|         |       | STY2163 | 2008364    | 2008915 | fliZ    | FliZ protein      |
| STM3028 | 25.63 |         |            |         |         |                   |
| STM3591 | 45.86 | STY2136 | 1987824    | 1988219 | yecG    | conserved         |
| STM0603 | 7.15  | STY1807 | 1725032    | 1726000 | astE    | succinylglu       |
| STM2914 | 7.15  | STY1674 | 1603370    | 1604026 | pdxH    | pyridoxami        |
| STM4070 | 12.44 | STY3807 | 3670095    | 3670850 | cdh     | CDP-diglyc        |
| STM2864 | 49.48 | STY2985 | 2860994    | 2861854 | sitC    | Iron transp       |
| STM3592 | 41.24 | STY1670 | 1599005    | 1600510 |         | putative pro      |
| STM3757 | 3.03  |         | STY2755    | 2592456 | 2597379 | shdA              |
|         |       | STY1764 | 1687445    | 1687636 |         | conserved         |
| STM2533 | 7.93  | STY1668 | 1597077    | 1597769 | ydqQ    | conserved         |
| STM3886 | 52.22 | STY1692 | 1617786    | 1618811 | purR    | purine nucl       |
| STM4230 | 17.3  | STY1752 | 1671506    | 1672252 |         | putative AE       |
| STM2870 | 48.5  |         | STY2990; ; | 2865811 | 2866482 | orgAb             |
| STM3027 | 6.64  | STY1688 | 1614382    | 1615029 | rnt     | ribonucleas       |

|         |       |         |         |         |             |
|---------|-------|---------|---------|---------|-------------|
| STM1483 | 27.41 | STY1585 | 1532330 | 1532692 | putative co |
| STM2088 | 8.61  |         |         |         |             |
| STM2982 | 19.58 | STY3979 | 3845856 | 3846779 | dsdC        |
| STM2028 | 17.82 | STY2840 | 2702208 | 2702897 | ung         |
| STM0702 | 40.54 | STY0432 | 442289  | 442978  | phoB        |
| STM0510 | 30.91 | STY0272 | 283821  | 284636  | yaeC        |
| STM2128 | 18.3  | STY0117 | 118231  | 118650  |             |
| STM3983 | 23.97 | STY0080 | 81542   | 82327   | caiD        |
| STM1767 | 12.85 | STY2158 | 2003884 | 2004660 | sdiA        |
| STM2361 | 17.17 | STY1378 | 1332068 | 1333609 | tyrR        |
| STM1760 | 19.59 | STY4249 | 4113665 | 4114591 | livH        |
| STM0203 | 9.86  | STY1574 | 1523846 | 1525135 |             |
| STM3885 | 47.42 | STY3989 | 3854206 | 3855126 |             |
| STM0564 | 3.62  | STY0388 | 394911  | 396869  | mod         |
| PSLT108 | 9.78  | STY0455 | 462053  | 463156  | ribD        |
| STM3701 | 11.96 | STY4429 | 4299821 | 4300318 | ubiC        |
| STM3370 | 4.54  | STY0112 | 112880  | 115231  | polB        |
| STM3625 | 36.4  | STY3421 | 3260857 | 3262124 |             |
| STM0421 | 9.39  | STY4315 | 4193344 | 4194348 | trpS        |
| STM0342 | 26.91 | STY0378 | 389375  | 389923  |             |
| STM2443 | 47.46 | STY2679 | 2513933 | 2514880 | cysW        |
| STM0942 | 47.78 | STY0553 | 559663  | 560349  | ybbA        |
| STM2239 | 4.29  | STY0649 | 650760  | 651995  |             |
| STM0918 | 3.75  | STY2844 | 2705480 | 2708140 |             |
| STM0460 | 8.1   | STY3383 | 3226722 | 3227963 | cca         |
| STM4023 | 50.73 | STY3430 | 3273610 | 3274494 | garR        |
| STM4477 | 9.06  | STY3459 | 3299500 | 3300507 |             |
| STM0920 | 65.9  |         |         |         |             |
| STM2627 | 100   | STY1021 | 1015718 | 1016092 |             |
| STM4306 | 57.35 | STY2774 | 2626509 | 2627138 |             |
| STM1365 | 9.25  | STY2793 | 2649495 | 2650373 |             |
|         |       | STY0581 | 589259  | 590326  | purK        |
| STM3631 | 5.58  |         |         |         |             |
| STM1987 | 23.58 | STY4904 | 4765611 | 4766675 |             |
| STM3707 | 6.16  | STY4088 | 3946749 | 3947783 |             |
| STM0889 | 36.03 | STY2583 | 2418642 | 2419328 | hisQ        |
| STM2539 | 19.17 | STY0012 | 11594   | 13510   | dnaK        |
| STM2146 | 7.01  | STY1328 | 1285596 | 1287158 | trpE        |
| STM1491 | 33.2  | STY2934 | 2808847 | 2810048 | proV        |
| STM1131 | 38.23 | STY3821 | 3682192 | 3682875 |             |
| STM0563 | 8.21  | STY0697 | 692238  | 693269  | hoIA        |
| STM0593 | 11.23 | STY2699 | 2532761 | 2533600 | eutJ        |
| STM4270 | 40.87 | STY3749 | 3607204 | 3608121 | oxyR        |
| STM3576 | 4.94  | STY0812 | 809038  | 809826  | modE        |
| STM1340 | 28.93 | STY0802 | 799013  | 800092  |             |
| STM2948 | 29.93 | STY2931 | 2804995 | 2805405 | nrdI        |
| STM0451 | 30.25 | STY1771 | 1693319 | 1693618 | himA        |
| STM3325 | 28.17 | STY3559 | 3403698 | 3404168 | accB        |
| STM0625 | 52.95 | STY0062 | 61791   | 63410   | citA        |
| STM3966 | 30.37 | STY0043 | 41720   | 42910   |             |
| STM0284 | 36.08 |         |         |         |             |
| STM1849 | 26.84 | STY2212 | 1782326 | 1782490 |             |
|         |       | STY1880 | 2049539 | 2049700 |             |

|         |       |                               |                               |                               |                      |                                             |
|---------|-------|-------------------------------|-------------------------------|-------------------------------|----------------------|---------------------------------------------|
| STM1614 | 12.5  | STY3910<br>STY2254            | 3770700<br>2081704            | 3771233<br>2081978            | atpH<br>pduN         | ATP synthase                                |
| STM2528 | 29.14 | STY4508                       | 4400057                       | 4400830                       | dmsC                 | putative dir                                |
| STM0683 | 4.83  | STY2117                       | 1967557                       | 1969290                       | argS                 | arginyl-tRN                                 |
| STM2912 | 29.6  | STY3547                       | 3386896                       | 3387825                       |                      | probable L                                  |
| STM3717 | 12.59 | STY4077                       | 3934610                       | 3935623                       | waal                 | lipopolysac                                 |
| STM1473 | 28.52 | STY4689                       | 4551268                       | 4551561                       | groES                | GroES prot                                  |
| STM3080 | 21.34 | STY1178                       | 1139603                       | 1139998                       | csgE                 | assembly/t                                  |
| STM3523 | 38.58 | STY3853                       | 3708770                       | 3709573                       | yihW                 | putative De                                 |
| STM0451 | 68.55 | STY3715                       | 3565553                       | 3565825                       | hupA                 | histone like                                |
| STM4427 | 47.85 | STY2671                       | 2508137                       | 2508376                       |                      | hypothetica                                 |
| STM2365 | 26.63 | STY2249                       | 2079449                       | 2079799                       | pduH                 | PduH prote                                  |
| STM3114 | 18.81 | STY4495                       | 4383814                       | 4386084                       | adi                  | arginine de                                 |
| STM0541 | 17.02 | STY3707                       | 3551123                       | 3551461                       | yifE                 | conserved                                   |
| STM4299 | 12.44 | STY2169                       | 2014368                       | 2014775                       | fliS                 | flagellar pr                                |
| STM4270 | 35.25 | STY1337                       | 1296327                       | 1297301                       | cysB                 | cys regulor                                 |
| STM1802 | 23.26 | STY4443                       | 4313162                       | 4314241                       | alr                  | alanine rac                                 |
| STM2665 | 49.15 | STY3500                       | 3340392                       | 3340679                       |                      | probable si                                 |
| STM4015 | 7.96  | STY0468                       | 474347                        | 475360                        | phnS                 | probable p                                  |
| STM4564 | 40.96 | STY3583                       | 3436587                       | 3437369                       | tatD                 | putative de                                 |
| STM1031 | 22.71 | STY3600                       | 3454404                       | 3455024                       | rhtC                 | threonine e                                 |
| STM1989 | 18.32 | STY3617                       | 3470496                       | 3470858                       |                      | conserved                                   |
| STM0847 | 7.58  | STY4782                       | 4641054                       | 4641830                       |                      | putative me                                 |
| STM1003 | 38.72 | STY0006<br>STY1221<br>STY2177 | 5966<br>1174728<br>2020145    | 7396<br>1175678<br>2021827    | yaaJ<br>flgJ<br>fliF | putative ar<br>flagellar pr<br>flagellar ba |
| STM3772 | 4.77  | STY3076                       | 2939541                       | 2941340                       | cysJ                 | sulfite redu                                |
| STM3421 | 14.76 | STY3138                       | 3012899                       | 3013369                       | ppdA                 | prepilin pe                                 |
| STM2970 | 26.35 | STY3167                       | 3039474                       | 3040703                       |                      | probable ai                                 |
| STM3526 | 17.24 | STY3781                       | 3647370                       | 3647855                       | menG                 | menaquinone                                 |
| STM1238 | 7.84  | STY3587                       | 3439205                       | 3440845                       | aarF                 | ubiquinone                                  |
| STM3541 | 15.64 | STY1477<br>STY1518<br>STY1494 | 1428801<br>1473676<br>1451664 | 1429466<br>1475232<br>1453397 |                      | putative re<br>hypothetica<br>NAD-linkec    |
| STM2177 | 35.19 | STY1942                       | 1832560                       | 1833219                       |                      | putative hy                                 |
| STM2129 | 14.11 | STY1974                       | 1860238                       | 1861610                       |                      |                                             |
| STM1127 | 9.99  | STY2095                       | 1947124                       | 1947993                       | hexR                 | putative he                                 |
| PSLT108 | 18.86 | STY2110                       | 1962167                       | 1962733                       | yecD                 | putative hy                                 |
| STM3614 | 13.17 | STY0552                       | 559078                        | 559692                        | tesA                 | acyl-coA th                                 |
| STM2568 | 12.46 | STY0578                       | 586253                        | 587500                        |                      | conserved                                   |
| STM4535 | 27.94 |                               |                               |                               |                      |                                             |
| STM2050 | 13.71 | STY1427                       | 1377651                       | 1378256                       | acpD                 | acyl carrier                                |
| STM0404 | 19    | STY1513                       | 1469419                       | 1470498                       |                      | putative isc                                |
| STM4581 | 13.35 | STY1330                       | 1288308                       | 1288928                       |                      | conserved                                   |
| STM2480 | 19.55 | STY1286                       | 1240163                       | 1241959                       | narX                 | nitrate/nitrit                              |
| STM1541 | 13.26 | STY1934                       | 1827491                       | 1828210                       | fadR                 | fatty acid-fa                               |
| STM3408 | 14.59 | STY1981<br>STY1399            | 1870173<br>1351292            | 1871612<br>1351978            |                      | conserved<br>conserved                      |
| STM2308 | 14.97 | STY0525                       | 531966                        | 532481                        | priC                 |                                             |
| STM0618 | 31.96 | STY3340                       | 3182112                       | 3183566                       |                      | possible m                                  |
| STM2812 | 8.25  | STY2876                       | 2754433                       | 2755842                       |                      | putative typ                                |
| STM2212 | 10.72 | STY4888                       | 4750653                       | 4751690                       |                      | conserved                                   |

|         |       |         |         |         |         |      |                |
|---------|-------|---------|---------|---------|---------|------|----------------|
|         |       | STY0425 |         | 434430  | 435275  | rdgC | recombinat     |
| STM0394 | 3.06  | STY3295 |         | 3141263 | 3142762 |      | possible ar    |
|         |       | STY2813 |         | 2676484 | 2677911 | yfhD | putative ex    |
| STM0398 | 9.73  | STY2903 |         | 2785422 | 2786837 | tctE | putative tw    |
| STM0442 | 8.4   | STY3335 |         | 3178727 | 3179647 |      | probable A     |
| STM0842 | 75.68 |         |         |         |         |      |                |
| STM0036 | 13.51 | STY3976 |         | 3842341 | 3842871 | yidF | conserved      |
| STM0457 | 8.71  | STY2852 |         | 2722539 | 2723276 |      | putative lipi  |
| STM2703 | 20.05 |         | STY4611 | 4483135 | 4484754 |      | probable pl    |
| STM2050 | 12.6  | STY2940 |         | 2814673 | 2815845 | emrA | multidrug r    |
| STM3369 | 28.54 | STY2928 |         | 2804050 | 2804481 |      | conserved      |
|         |       | STY4135 |         | 3998655 | 3999479 | bax  | putative ex    |
|         |       | STY4070 |         | 3927682 | 3928959 | kdtA | 3-deoxy-D-     |
| STM1826 | 72.55 | STY3110 |         | 2977657 | 2979024 | sdaB | L-serine de    |
| STM3220 | 19.68 | STY3135 |         | 3011636 | 3011956 | ppdC | prepilin pe    |
| STM3512 | 8.21  | STY2418 |         | 2248211 | 2249445 | yeiA |                |
|         |       | STY2460 |         | 2290935 | 2292695 | yejH | putative he    |
| STM1767 | 50.19 | STY2472 |         | 2303653 | 2304300 | narP | nitrate/nitrit |
|         |       | STY1950 |         | 1839365 | 1840060 |      | conserved      |
| STM2071 | 16.88 | STY4372 |         | 4239696 | 4240088 | rpsH | 30S riboso     |
| STM3603 | 11.18 | STY0942 |         | 934046  | 934366  |      | conserved      |
| STM3901 | 7.03  | STY0931 |         | 921807  | 923525  | poxB | pyruvate de    |
| STM0053 | 10.6  | STY4361 |         | 4234878 | 4235699 | rplB | 50S riboso     |
| STM0969 | 6.11  | STY4705 |         | 4563791 | 4565293 | yjeM | putative ar    |
| STM1446 | 22.98 | STY4747 |         | 4606057 | 4606452 | rpsF | 30s ribosor    |
| STM2535 | 3.16  | STY3380 |         | 3221541 | 3224384 | glnE | adenyl-tran    |
| STM4509 | 15.63 | STY3300 |         | 3146822 | 3147370 |      | conserved      |
|         |       | STY4751 |         | 4607644 | 4608570 |      | putative me    |
|         |       | STY4866 |         | 4728340 | 4729074 |      | probable a:    |
| STM3599 | 21.32 | STY4684 |         | 4546023 | 4547324 | dcuA | anaerobic (    |
| STM4447 | 5.82  | STY0407 |         | 420379  | 421536  | ampH | penicillin-bi  |
| STM0718 | 10.25 | STY2373 |         | 2204123 | 2205088 |      | putative su    |
| STM3627 | 29.11 | STY2455 |         | 2286542 | 2288131 | yefF | putative AE    |
| STM3359 | 25.09 | STY2465 |         | 2295048 | 2295275 | yejL | conserved      |
|         |       | STY2323 |         | 2152275 | 2153021 | wcaE | putative gly   |
| STM2073 | 13.15 | STY2399 |         | 2232222 | 2232890 | yohC | putative me    |
| STM4254 | 18.97 | STY4109 |         | 3968959 | 3969549 | mtlR | mannitol op    |
|         |       | STY4195 |         | 4060716 | 4061744 | yhjD | putative me    |
| STM2495 | 15.7  | STY4285 |         | 4160566 | 4161141 |      | conserved      |
| STM3260 | 9.06  | STY3416 |         | 3258519 | 3259220 |      | conserved      |
| STM2068 | 8.18  | STY2097 |         | 1949632 | 1950630 | msbB | lipid A acyli  |
| STM2871 | 22.6  | STY1711 |         | 1635704 | 1636453 | ssaJ | putative pa    |
| STM2746 | 6.34  | STY0760 |         | 760426  | 761319  |      | putative gly   |
| STM0659 | 29.17 | STY0849 |         | 843040  | 843450  |      | putative me    |
| STM3399 | 11.28 |         |         |         |         |      |                |
| STM0838 | 41.09 | STY1083 |         | 1061045 | 1062952 |      | ABC transp     |
| STM4300 | 29.82 |         |         |         |         |      |                |
| STM0808 | 28.55 | STY0841 |         | 837955  | 838660  | ybhL |                |
| STM0855 | 16.09 |         |         |         |         |      |                |
| STM2514 | 5.51  | STY1738 |         | 1657246 | 1660308 | ttrA | tetrathionat   |
| STM0318 | 21.74 | STY3410 |         | 3254602 | 3255000 |      | putative me    |
| STM2791 | 5.89  | STY4738 |         | 4599348 | 4600412 | yjfR | conserved      |



|          |       |                                 |         |         |                          |
|----------|-------|---------------------------------|---------|---------|--------------------------|
| STM2585A | 98    |                                 |         |         |                          |
| STM0670  | 21.72 | STY1724                         | 1643332 | 1643574 | ssaE putative se         |
| STM3166  | 24.99 | STY0411                         | 424815  | 425030  | putative me              |
| STM2485  | 24.57 | STY2622                         | 2456709 | 2456993 | conserved                |
| STM2377  | 15.48 | STY4325                         | 4208489 | 4208656 | yhfG conserved           |
| STM1781  | 36.82 | STY2225                         | 2059418 | 2059699 | cbiN putative co         |
| STM2204  | 7.03  | STY0470                         | 476417  | 477520  | phnW 2-aminoeth          |
| STM0749  | 40.25 | STY4749                         | 4606778 | 4607005 | rpsR 30s ribosor         |
|          |       | STY4366                         | 4237483 | 4237674 | rpmC 50S riboso          |
| STM3925  | 40.59 | STY4788                         | 4647525 | 4647767 | relB RelB protei         |
|          |       | STY0383                         | 391868  | 392227  | probable lip             |
| STM2479  | 13.01 | STY3248                         | 3112625 | 3113572 | gshB glutathione         |
| STM1019  | 55.07 | STY1200                         | 1158472 | 1158717 | dinI damage-in           |
| STM0487  | 33.18 | STY3029                         | 2898592 | 2899034 |                          |
| STM0117  | 14.19 |                                 |         |         |                          |
| STM2263  | 31.35 |                                 |         |         |                          |
| STM0688  | 32.56 | STY4334                         | 4215686 | 4215940 | yheU conserved           |
| STM0912  | 21.28 | STY0490                         | 495358  | 495981  | clpP ATP-deper           |
| STM1996  | 28.62 | STY1881                         | 1782934 | 1783146 | cspH putative co         |
| STM3499  | 14.77 | STY1824                         | 1742809 | 1743252 | conserved                |
|          |       | STY1821                         | 1741482 | 1742138 | pncA pyrazinami          |
| STM4377  | 28.58 | STY4908                         | 4769216 | 4769662 | rimI ribosomal- $\gamma$ |
| STM1430  | 53.77 | STY3891                         | 3751662 | 3752660 | rbsR ribose oper         |
| STM1112  | 13.45 | STY2079                         | 1933933 | 1934286 | putative ex              |
|          |       | STY4474                         | 4360977 | 4361123 | hypothetica              |
|          |       | STY0770                         | 768519  | 768671  | hypothetica              |
| STM4410  | 40.39 | STY2391                         | 2222741 | 2222848 | hypothetica              |
| STM3004  | 27.27 | STY2559                         | 2394916 | 2395068 | hypothetica              |
| STM4007  | 41.72 | STY1938                         | 1831167 | 1831340 | conserved                |
| STM0395  | 6.42  |                                 |         |         |                          |
| STM4074  | 39.37 |                                 |         |         |                          |
| PSLT106  | 55.42 |                                 |         |         |                          |
| PSLT044  | 6.63  |                                 |         |         |                          |
| STM0347  | 11.8  |                                 |         |         |                          |
| STM1761  | 8.74  |                                 |         |         |                          |
| STM3861  | 3.91  |                                 |         |         |                          |
| PSLT021  | 26.29 |                                 |         |         |                          |
| STM0710  | 62.36 | aSTY2807                        |         |         |                          |
| STM3114  | 63.54 | STY0739                         | 739365  | 741433  | speF                     |
| STM0916  | 72.33 |                                 |         |         |                          |
| STM0507  | 49.73 | aSTY0866                        |         |         |                          |
| STM0159  | 21.46 |                                 |         |         |                          |
| STM0637  | 60.78 | aSTY0896                        |         |         |                          |
| STM4305  | 11.33 | STY2044                         | 1912585 | 1913061 | putative en              |
|          |       | STY3292                         | 3139187 | 3139414 | putative me              |
|          |       | STY3661                         | 3517613 | 3517834 | hypothetica              |
|          |       | STY2420                         | 2249889 | 2250164 | insA insertion el        |
| STM3747  | 4.6   | STY2884                         | 2762798 | 2765875 | putative ba              |
|          |       | STY4124; STY4658; F-<br>STY3700 |         |         |                          |

|         |       |          |          |         |         |       |               |
|---------|-------|----------|----------|---------|---------|-------|---------------|
| STM0689 | 20.14 | STY0114  |          | 115571  | 116011  |       | putative IS   |
| STM2357 | 33.93 | STY2070  |          | 1926656 | 1926877 | kil   | putative ce   |
| STM0107 | 16.49 | STY2345  |          | 2183491 | 2183793 |       | hypothetica   |
| STM3331 | 28.85 | aSTY2717 |          |         |         |       |               |
| STM3483 | 31.5  | STY2886  | STY3698  | 2766002 | 2766340 |       | putative ph   |
| STM0952 | 23.75 | STY0159  |          | 164472  | 165413  |       | putative lys  |
|         |       | STY0313  |          | 326234  | 326704  |       | hypothetica   |
| STM1473 | 42.93 | STY2203  |          | 2041179 | 2042363 | ompS1 | outer mem     |
| STM4537 | 16.97 | STY2361  |          | 2194299 | 2194718 |       | putative ex   |
|         |       | STY2879  |          | 2759733 | 2760560 |       | putative rev  |
| STM1791 | 10.73 | STY3067  |          | 2928569 | 2929294 |       | hypothetica   |
|         |       | STY1592  |          | 1539260 | 1539712 |       | conserved     |
|         |       | STY1609  |          | 1547849 | 1548268 |       | hypothetica   |
|         |       | STY2363  |          | 2195153 | 2195350 |       | hypothetica   |
| STM2120 | 8.52  | STY3762  |          | 3624532 | 3626013 |       | putative Gr   |
| STM0618 | 6.58  | aSTY4106 |          |         |         |       |               |
|         |       | STY1594  |          | 1539907 | 1540137 |       | hypothetica   |
| STM2221 | 20.4  | STY1611  |          | 1548561 | 1549211 |       | putative lipi |
|         |       | STY1627  |          | 1560491 | 1560772 |       | hypothetica   |
| STM3683 | 29.3  | aSTY4616 |          |         |         |       |               |
| STM2461 | 3.55  | STY4523  |          | 4412040 | 4413839 |       | hypothetica   |
| STM4385 | 8.97  | STY4558  |          | 4439581 | 4440321 |       | putative ex   |
| STM1534 | 12.47 | STY4575  |          | 4453457 | 4453849 |       | hypothetica   |
|         |       | STY4592  |          | 4467675 | 4469624 |       | hypothetica   |
| STM1651 | 15.74 | STY4617  |          | 4487686 | 4488117 |       | putative ph   |
|         |       | STY4852  |          | 4716299 | 4716538 |       | hypothetica   |
| STM3375 | 11.06 | aSTY4626 |          |         |         |       |               |
| STM3081 | 10.96 | STY4650  |          | 4509535 | 4510281 | yjhP  | conserved     |
|         |       | STY4553  |          | 4436587 | 4437054 | pilK  | putative ex   |
| STM3053 | 8.56  | STY4572  |          | 4449922 | 4450341 |       | hypothetica   |
| STM0814 | 16.46 | STY4589  |          | 4466173 | 4466757 |       | hypothetica   |
| STM2514 | 18.38 | STY0198  |          | 207905  | 208285  | panD  | aspartate 1   |
| STM3054 | 18.93 | STY0271  |          | 283298  | 283702  | rcsF  | RcsF prote    |
| STM1473 | 51.97 |          | STY1532  | 1486828 | 1487253 |       |               |
| STM3913 | 13.89 | STY1332  |          | 1289991 | 1290581 | btuR  | COB(I) alai   |
| STM0782 | 15.15 | STY3928  |          | 3791978 | 3792868 | pstA  | phosphate     |
| STM2129 | 47.88 | STY3889  |          | 3750269 | 3751696 | yieO  |               |
| STM3119 | 7.43  | STY4927  |          | 4787603 | 4788835 | nadR  | conserved     |
| STM3796 | 19.36 | STY2231  |          | 2061940 | 2062730 | cbiJ  |               |
| STM2074 | 22.41 | STY4350  |          | 4226794 | 4227168 | rpsL  | 30S riboso    |
| STM3199 | 8.2   | STY2688  |          | 2521420 | 2522319 | hemF  | coproporph    |
| STM1491 | 49.37 | STY3498  |          | 3338163 | 3338888 |       | probable A    |
| STM0817 | 15.06 | STY3538  |          | 3379525 | 3380154 |       | possible Gi   |
| STM3878 | 19.5  |          | STY0155  | 159617  | 160045  | yacA  | conserved     |
| STM3172 | 13.51 | STY0190  |          | 198720  | 200330  | yacK  | possible m    |
| STM0498 | 9.78  | STY0212  |          | 221438  | 222142  | sfsA  | sugar ferm    |
| STM4294 | 6.83  | STY0246  |          | 257880  | 259232  | yaeL  | putative me   |
| STM3609 | 37.94 | STY1554  |          | 1506463 | 1507842 |       | putative me   |
| STM1787 | 42.27 | STY1525  |          | 1481216 | 1483018 | hyaB2 |               |
| STM0658 | 41.18 |          |          |         |         |       |               |
| STM3114 | 59.11 |          | aSTY0739 |         |         |       |               |
| STM0574 | 55.24 |          |          |         |         |       |               |

|         |       |                   |         |         |                    |
|---------|-------|-------------------|---------|---------|--------------------|
| STM2088 | 20.42 | STY2366           | 2198158 | 2198574 | conserved          |
| STM3484 | 37.82 |                   |         |         |                    |
| STM2016 | 15.2  |                   |         |         |                    |
| STM2197 | 30.63 | STY4925           | 4785018 | 4785986 | serB putative ph   |
| STM1372 | 6.75  | STY0281           | 297748  | 299115  | mltD membrane      |
| STM3266 | 22.41 | STY0355           | 364627  | 365205  | gmhA phosphohe     |
| STM0952 | 22.03 |                   |         |         |                    |
| STM3909 | 13.57 | STY1094           | 1072136 | 1072741 | conserved          |
| STM2810 | 35.61 | STY1572           | 1521915 | 1522562 | putative AE        |
| STM3028 | 11.11 |                   |         |         |                    |
| STM0168 | 21.98 | STY1080           | 1057174 | 1057719 | conserved          |
| STM2513 | 10.97 | STY1667           | 1596454 | 1597074 | conserved          |
| STM4122 | 14.67 | STY1174           | 1137125 | 1137679 | conserved          |
| STM3371 | 24.02 | STY1228           | 1184161 | 1184745 | conserved          |
| STM1375 | 41.75 |                   |         |         |                    |
|         |       | aSTY1255          |         |         |                    |
| STM3581 | 14.24 | STY1663           | 1592218 | 1592799 | putative me        |
| STM0268 | 24.52 | STY4374           | 4240644 | 4240997 | rplR 50S riboso    |
| STM1303 | 65.03 | STY4328           | 4209929 | 4211146 | argD acetylornit   |
| STM1708 | 30.04 | STY4291           | 4166474 | 4166710 | feoA putative fer  |
| STM2274 | 38.36 |                   |         |         |                    |
| STM0106 | 10.04 | STY0994           | 988713  | 990035  | mukF killing facto |
| STM3169 | 38.46 | STY3817           | 3679220 | 3680202 |                    |
| STM0033 | 54.08 | STY3765           | 3628564 | 3630120 | hypothetica        |
|         |       | STY3746           | 3604612 | 3604971 | yjD putative me    |
|         |       | STY3027           | 2897992 | 2898519 | hypothetica        |
| STM2036 | 19.03 | STY3756           | 3618043 | 3618879 | yjO putative Ar    |
| STM3323 | 4.72  |                   |         |         |                    |
|         |       | STY3045           | 2912190 | 2912594 | slyA putative re   |
| STM3587 | 25.94 | STY2624           | 2458732 | 2459487 | vacJ VacJ lipopr   |
| STM1029 | 73.74 |                   |         |         |                    |
| STM3582 | 18.06 | STY2734           | 2570412 | 2571479 | putative me        |
| STM0395 | 4.16  | STY4403           | 4267775 | 4269556 | aceK isocitrate d  |
| STM3161 | 32.82 | STY3769           | 3634542 | 3635720 | metB cystathionir  |
| STM2483 | 10.91 | STY3753           | 3611776 | 3612927 | argE acetylornit   |
| STM3038 | 20.55 |                   |         |         |                    |
|         |       | STY3050           | 2916132 | 2917253 | nlpD lipoprotein   |
| STM3748 | 19.03 | STY2613           | 2447375 | 2447924 |                    |
| STM1195 | 23.86 | STY2682           | 2516815 | 2517660 | yfeF putative ox   |
| STM0800 | 27.87 | STY2467           | 2297837 | 2300230 | sspH2 secreted ef  |
|         |       | STY1132           | 1097595 | 1098035 | hpcR homoproto     |
| STM0137 | 31.42 | STY1813           | 1732384 | 1732800 | putative Ml        |
|         |       | STY4710           | 4571379 | 4571924 | orn oligoribonu    |
| STM3675 | 57.69 | STY4742           | 4602981 | 4603631 | sgaH putative he   |
| STM0517 | 21.88 |                   |         |         |                    |
| STM1371 | 49.62 | STY2486           | 2315852 | 2316115 | yojF putative na   |
| STM1195 | 40.44 |                   |         |         |                    |
| STM4004 | 6.82  | STY4856           | 4719101 | 4720729 | conserved          |
| STM1919 | 60.89 | STY4892           | 4754435 | 4756095 | tsr                |
| STM3491 | 11.09 |                   |         |         |                    |
|         |       | STY1261           | 1216368 | 1217081 | cobB putative re   |
| STM0924 | 54.28 | STY1682           | 1610160 | 1610681 | sodC copper-zinc   |
| STM1147 | 19.74 |                   |         |         |                    |
|         |       | aSTY1184; STY1185 |         |         |                    |

|         |       |         |         |         |      |                     |
|---------|-------|---------|---------|---------|------|---------------------|
| STM3492 | 9.38  | STY4356 | 4232125 | 4232592 | hopD | Type III lea        |
| STM2056 | 23.05 | STY2705 | 2538230 | 2538790 |      | putative eth        |
| STM0880 | 41.66 | STY1263 | 1218234 | 1219013 | potC | spermidine          |
| STM2205 | 28.28 | STY1785 | 1706666 | 1707598 | pfkB | 6-phosphol          |
|         |       | STY4727 | 4590817 | 4591221 | yjfl | conserved           |
| STM0428 | 35.76 | STY1266 | 1221515 | 1222651 | potA | spermidine          |
| STM3640 | 43.46 | STY0024 | 24473   | 25015   | bcfA | fimbrial sut        |
|         |       | STY1817 | 1736601 | 1737644 | selD | selenophos          |
| STM1132 | 27.02 | STY1776 | 1697718 | 1697915 | rpml | 50S riboso          |
| STM0514 | 39.22 | STY1693 | 1618808 | 1619740 | ydhB | putative tra        |
| STM3319 | 48.31 | STY4252 | 4116631 | 4117344 | livF | high-affinity       |
| STM1238 | 11.42 | STY0131 | 132490  | 133581  | leuB | 3-isopropyl         |
| STM4290 | 25    | STY0727 | 727357  | 728661  | citA | citrate-prot        |
|         |       | STY4427 | 4297201 | 4298559 | lamB | maltoporin          |
| STM4076 | 23.77 | STY3895 | 3754641 | 3755660 | rbsC | high affinity       |
| STM1490 | 9     | STY0225 | 235669  | 237090  | yadQ | putative me         |
| STM0092 | 3.79  | STY0494 | 500816  | 502687  | ppiD | peptidyl-pro        |
| STM0046 | 29.62 | STY0441 | 451090  | 451671  | yajB | conserved           |
| STM4238 | 4.42  | STY4438 | 4307686 | 4308996 |      | putative ex         |
| STM4428 | 55.77 | STY2603 | 2439613 | 2440791 |      | putative tra        |
| STM2858 | 7.53  | STY1787 | 1708092 | 1708952 |      | conserved           |
| STM1108 | 11.41 |         |         |         |      |                     |
| STM1372 | 8.02  | STY1650 | 1577621 | 1579327 |      | conserved           |
| STM1114 | 8.38  | STY2288 | 2113613 | 2114596 | cld  | polysaccha          |
| STM4268 | 14.41 | STY3932 | 3795271 | 3796734 | yieG | putative me         |
| STM2466 | 15.63 | STY0244 | 256240  | 256998  |      | undecaprei          |
|         |       | STY2265 | 2091002 | 2092060 | yeeA | putative me         |
| STM2467 | 16.78 | STY0145 | 147729  | 148811  | mraY | phospho-N           |
| STM0125 | 3.56  | STY2592 | 2429356 | 2430873 | purF | amidophos           |
| STM2924 | 9.82  | STY4243 | 4109216 | 4110070 | rpoH | RNA polym           |
| STM3504 | 11.84 | STY3463 | 3305058 | 3307193 | pnp  | polynucleoi         |
| STM0618 | 8.46  | STY2801 | 2656457 | 2657596 | hcaT | putative 3- $\beta$ |
| STM2622 | 100   |         |         |         |      |                     |
| STM0472 | 10.67 | STY0249 | 262287  | 263312  | lpxD | UDP-3-O-[:          |
| STM1041 | 86.24 |         |         |         |      |                     |
| STM0115 | 9.72  | STY4058 | 3918961 | 3919863 |      | putative req        |
| STM1743 | 48.06 | STY4171 | 4030884 | 4031867 | dppD | dipeptide tr        |
| STM2282 | 13.14 | STY4258 | 4122238 | 4122978 | ugpQ | glyceroph           |
| STM2956 | 27.47 | STY4050 | 3912117 | 3914228 | spoT | guanosine-          |
| STM3543 | 49.88 | STY2575 | 2412405 | 2413424 |      | putative tra        |
|         |       | STY2804 | 2660730 | 2662274 | cadC | transcriptio        |
| STM0195 | 35.3  | STY2676 | 2511407 | 2511784 |      | putative ex         |
| STM1954 | 43.79 | STY0868 | 860063  | 860809  | glnH | glutamine-l         |
| STM0768 | 8.64  | STY0626 | 623796  | 624914  |      | conserved           |
| STM4469 | 66.47 | STY4803 | 4663345 | 4664349 |      | ornithine c:        |
| STM0820 | 45.15 | STY2836 | 2698505 | 2699839 | srmB | ATP-deper           |
| STM4044 | 9.16  | STY3373 | 3215354 | 3216070 | ribB | 3,4-dihydro         |
| STM0998 | 55.15 | STY4444 | 4314427 | 4315620 | tyrB | aromatic-ar         |
| STM3073 | 8.77  | STY2795 | 2651602 | 2652420 | asrB | anaerobic s         |
| STM3870 | 8.63  | STY2280 | 2106396 | 2107295 | hisG | ATP phosp           |
| STM1947 | 42.45 | STY0596 | 602214  | 602846  | fimZ | probable tr         |
| STM2164 | 17.62 | STY3852 | 3707980 | 3708579 | yihX | putative ha         |

|         |       |          |          |         |         |                |             |
|---------|-------|----------|----------|---------|---------|----------------|-------------|
| STM1223 | 38.53 | STY0913  | 906091   | 906936  | potI    | putrescine     |             |
| STM2253 | 9.05  | STY0749  | 750319   | 751740  | phrB    | deoxyribod     |             |
| STM2976 | 9.26  | STY3803  | 3666475  | 3667515 |         | hypothetica    |             |
|         |       | STY0719  | 716873   | 717625  | nagD    | NagD prote     |             |
| STM2183 | 14.03 | STY0771  | 768705   | 769496  | nei     | endonuclea     |             |
| STM2076 | 11.57 | STY3761  | 3623363  | 3624253 | metF    | 5,10 methy     |             |
|         |       | STY4464  | 4349505  | 4349963 | soxR    | SoxR prote     |             |
| STM4264 | 28.77 | aSTY4459 |          |         |         |                |             |
| STM3207 | 6.89  | STY2803  | 2659359  | 2660549 | hmpA    | flavoheмо      |             |
|         |       | STY0178  | 185869   | 186153  |         | probable s     |             |
| STM0217 | 3.06  | STY3721  | 3570148  | 3572043 | thiC    | thiamine bi    |             |
| STM3248 | 50.57 | STY3855  | 3710668  | 3711564 | yihU    | putative ox    |             |
| STM0163 | 18.79 |          |          |         |         |                |             |
| STM4515 | 3.84  | STY3001  | 2874081  | 2875712 | stpA    | tyrosine ph    |             |
|         |       | STY1231  | 1185823  | 1186902 | plsX    | fatty acid/p   |             |
| STM4368 | 9.47  | STY1350  | 1309430  | 1311364 | rnb     | exoribonuc     |             |
| STM0095 | 28.57 | STY2851  | 2721427  | 2722470 | sfhB    | ftsH suppre    |             |
| STM3692 | 12.91 | STY0058  | 57793    | 58743   | lytB    | LytB protei    |             |
| STM2138 | 30.96 | STY1038  | 1024883  | 1025008 |         | putative ba    |             |
| STM3616 | 2.17  | STY4009  | 3871470  | 3872852 |         | putative gly   |             |
| STM0316 | 20.23 | STY1710  | 1635138  | 1635686 |         | putative pa    |             |
| STM1729 | 14.26 | STY1322  | 1279375  | 1279878 |         | conserved      |             |
| STM2724 | 29.52 |          |          |         |         |                |             |
| PSLT108 | 16.26 | STY0459  | 465189   | 465704  |         | phosphatid     |             |
| STM2265 | 28.49 | STY1405  | 1356335  | 1356850 | ogt     | O6-methyl      |             |
| STM0654 | 14.57 | STY1292  | 1250985  | 1252514 |         | putative se    |             |
| STM1825 | 21.9  | STY1955  | 1844138  | 1844716 |         | conserved      |             |
| STM2246 | 50.42 | STY1285  | 1239520  | 1240170 | narL    | nitrate/nitrit |             |
| STM1800 | 2.9   | STY3133  | 3005183  | 3008071 | ptr     | protease III   |             |
| STM3274 | 7.83  | STY3055  | 2920316  | 2921026 | ygbP    | 2-C-methyl     |             |
| STM0164 | 43.27 | STY3044  | 2911407  | 2912171 |         | DeoR-fami      |             |
| STM2981 | 2.12  | STY1150  | 1110655  | 1112541 | scsB    | membrane       |             |
| STM0644 | 12.84 | STY0103  | 101228   | 102076  | apaH    | bis(5'-nucl    |             |
| STM0400 | 55.26 | STY3625  | 3480167  | 3481552 | yifK    | probable ai    |             |
| STM2502 | 36.97 | STY3641  | 3498321  | 3499802 | gppA    | guanosine-     |             |
| STM2851 | 12.62 | STY3734  | 3586055  | 3586552 | rplJ    | 50S riboso     |             |
| STM2555 | 13.82 | STY1945  | 1834419  | 1835231 | minD    | septum site    |             |
|         |       | STY1971  | 1858820  | 1859059 |         | putative ex    |             |
| STM1800 | 15.6  | STY2129  | 1981621  | 1982124 | cheW    | purine bind    |             |
| STM0229 | 15.89 | STY4407  | 4276390  | 4277079 | pepE    | peptidase I    |             |
| STM2485 | 13.78 | STY0471  | 477530   | 478339  | phnX    | phosphono      |             |
| STM2941 | 21    | STY3831  | 3691531  | 3691845 | yiiL    | conserved      |             |
| STM2069 | 12.23 | STY3595  | 3449980  | 3450933 | metR    | trans-activ    |             |
| STM4308 | 18.27 |          | STY0658  | 657980  | 658462  | conserved      |             |
| STM3059 | 18.08 | STY1318  | 1276435  | 1276839 |         | conserved      |             |
| STM1764 | 75.42 | STY1488  | 1441124  | 1444852 | narZ    | respiratory    |             |
| STM0395 | 9.23  | STY1455  | 1405735  | 1406748 | tehA    | tellurite res  |             |
| STM2072 | 5.92  |          | STY1439a | 1391185 | 1391325 | sseJ           | secreted ef |
|         |       | STY1394  | 1346408  | 1347253 |         | putative lip   |             |
| STM3390 | 62.94 | STY0520  | 525281   | 526474  | acrA    | acriflavin r   |             |
| STM2962 | 19    | STY1519  | 1475409  | 1476695 |         | membrane       |             |
| STM2810 | 10.8  | STY1534  | 1488569  | 1489516 |         | putative me    |             |

|         |       |         |          |             |               |               |
|---------|-------|---------|----------|-------------|---------------|---------------|
| STM3077 | 62.12 | STY0979 | 974571   | 975332      | putative lipi |               |
| STM1506 | 12.51 | STY0663 | 662852   | 664090 ybdR | hypothetica   |               |
| STM0621 | 22.42 | STY1311 | 1271018  | 1271347     | conserved     |               |
| STM4450 | 57.65 |         |          |             |               |               |
| STM2885 | 8.4   |         |          |             |               |               |
| STM2551 | 4.37  | STY1460 | 1410094  | 1412058     | putative pe   |               |
| STM4293 | 8.7   |         | STY1433  | 1384141     | 1384578       | conserved     |
| STM1712 | 7.99  |         |          |             |               |               |
| STM0613 | 16.73 | STY2084 | 1936709  | 1937407     | exoX          | exodeoxyri    |
| STM4044 | 50.39 | STY3112 | 2980042  | 2981190     | fucO          | 1,2-propan    |
| STM4270 | 19.3  | STY3166 | 3038850  | 3039332     |               | conserved     |
| STM3646 | 10.43 | STY3218 | 3085804  | 3087036     | serA          | D-3-phospl    |
| STM3614 | 16.13 | STY3246 | 3111090  | 3111797     | endA          | endonuclea    |
| STM1952 | 15.58 | STY0487 | 492267   | 492845      | yajG          | putative lipi |
| STM4428 | 46.89 | STY4230 | 4096560  | 4097777     |               | putative me   |
| STM2269 | 3.42  | STY4182 | 4042585  | 4044885     | yhjN          | putative po   |
| STM4387 | 47.26 | STY4120 | 3984123  | 3984983     | yiaR          | putative su   |
|         |       | STY4091 | 3950029  | 3951552     |               | 2,3-bisphos   |
| STM2960 | 66.9  | STY3099 | 2967439  | 2968779     | ygcY          | probable gl   |
| STM2450 | 31.16 | STY3129 | 2996893  | 2998146     |               | N-acetylm     |
| STM4486 | 10.77 | STY3196 | 3061741  | 3063258     | lysS          | lysyl tRNA    |
| STM1211 | 4.34  | STY4215 | 4081901  | 4083103     |               | putative ex   |
| STM3207 | 28.99 | STY3121 | 2989396  | 2989791     | ygdD          | conserved     |
| STM4307 | 28.35 |         | aSTY4512 |             |               |               |
| STM4292 | 57.05 | STY3354 | 3198301  | 3198960     |               | probable tv   |
| STM3091 | 45.57 | STY3160 | 3032758  | 3034173     | araE          | L-arabinosi   |
| STM1343 | 37.46 | STY2450 | 2280045  | 2280617     |               | putative lipi |
|         |       | STY2306 | 2134585  | 2135484     | rfbD          | dTDP-4-de     |
| STM3790 | 11.6  | STY2388 | 2219326  | 2220045     | yehT          | putative tw   |
| STM2781 | 32.46 | STY0936 | 929214   | 930164      | ybjX          | putative vir  |
|         |       | STY4136 | 3999540  | 4000718     | xylR          | xylose ope    |
| PSLT016 | 30.95 | STY4517 | 4407033  | 4407326     |               | conserved     |
|         |       | STY4089 | 3947770  | 3948732     |               | putative ex   |
| STM0564 | 8.85  | STY4206 | 4071684  | 4072526     |               | conserved     |
| STM3299 | 52.47 | STY4293 | 4169567  | 4170040     | greB          | transcriptio  |
| STM3796 | 7.65  | STY3473 | 3318260  | 3319180     | folP          | dihydropter   |
| STM3390 | 4.24  | STY4920 | 4780272  | 4781495     | deoB          | phosphope     |
| STM3391 | 28.27 |         |          |             |               |               |
| STM0638 | 5.8   | STY3465 | 3307855  | 3308799     | truB          | tRNA pseu     |
| STM4166 | 11.32 | STY3363 | 3205236  | 3205868     |               | conserved     |
| STM0863 | 8.05  | STY3262 | 3123111  | 3123830     |               | conserved     |
| STM4323 | 12.26 | STY2943 | 2819165  | 2819680     | luxS          | autoinduce    |
| STM4538 | 14.18 | STY2411 | 2243505  | 2243903     | yohJ          | putative me   |
| STM2220 | 22.43 | STY2456 | 2288135  | 2288479     | yejG          | conserved     |
| STM1719 | 34.87 | STY2459 | 2290088  | 2290783     | yejD          | ribosomal s   |
| STM2124 | 10.55 | STY2383 | 2214047  | 2215156     | mrp           | conserved     |
| STM2934 | 35.71 | STY2648 | 2483942  | 2484268     |               | conserved     |
| STM0136 | 17.83 | STY4373 | 4240101  | 4240634     | rplF          | 50S riboso    |
| STM0536 | 33.35 | STY4324 | 4207808  | 4208380     | ppiA          | peptidyl-prc  |
|         |       | STY4720 | 4582799  | 4584058     | hflK          | HflK protei   |
| STM1770 | 7.92  | STY4024 | 3887569  | 3888044     | cigR          |               |

|         |       |         |         |         |         |             |
|---------|-------|---------|---------|---------|---------|-------------|
| STM3113 | 13.66 | STY3330 |         | 3174262 | 3175146 | possible ox |
| STM3120 | 25.51 | STY3216 |         | 3084252 | 3084581 | conserved   |
| STM2442 | 44.46 | STY0815 |         | 811044  | 811733  | modB        |
| STM0194 | 19.01 | STY0858 |         | 853134  | 854108  | ybiB        |
|         |       | STY2866 |         | 2735495 | 2736736 | corB        |
| STM3541 | 7.57  | STY2290 |         | 2116142 | 2117548 | gnd         |
| STM4556 | 5.17  | STY0806 |         | 801935  | 802975  | galM        |
| STM3586 | 25.95 | STY0852 |         | 845757  | 847493  | ybhF        |
| STM0591 | 20.74 | STY0895 |         | 889039  | 889665  | yliJ        |
| STM0931 | 11.76 | STY3493 |         | 3334497 | 3335474 |             |
| STM2184 | 32.78 | STY3402 |         | 3247727 | 3248419 | ygjQ        |
| STM4261 | 41.92 |         | STY4513 | 4404849 | 4405046 |             |
| STM1546 | 41.99 | STY0398 |         | 407252  | 407527  |             |
| STM1356 | 18.64 | STY2822 |         | 2685777 | 2686037 |             |
| STM3064 | 27.02 |         |         |         |         |             |
| STM0107 | 12.48 | STY4799 |         | 4659574 | 4660035 | pyrI        |
| STM2775 | 7.47  | STY0629 |         | 628121  | 629335  | fes         |
| STM3641 | 10.44 | STY3752 |         | 3610683 | 3611687 | argC        |
| STM3959 | 32.16 | STY4722 |         | 4585144 | 4585341 | yjeT        |
|         |       | STY1732 |         | 1652636 | 1652848 | ydhZ        |
| STM2174 | 16.53 |         | STY3564 | 3408993 | 3409838 | yhdG        |
| STM4438 | 10.09 |         |         |         |         |             |
| STM0834 | 33.56 | STY4446 |         | 4316649 | 4317065 |             |
| STM2378 | 18.14 | STY4642 |         | 4504708 | 4505217 | cII         |
|         |       | STY2907 |         | 2788477 | 2788908 |             |
| STM2968 | 23.6  | STY3885 |         | 3742219 | 3742488 | yihD        |
| STM1228 | 47.58 | STY3026 |         | 2897705 | 2897995 |             |
| STM2204 | 37.73 |         |         |         |         |             |
| STM4328 | 34.98 | STY3057 |         | 2921547 | 2921930 | ygbE        |
| STM4314 | 33.5  | STY1661 |         | 1591397 | 1591612 |             |
| STM3514 | 26.08 | STY1560 |         | 1510585 | 1510926 |             |
| STM2038 | 72.07 | STY2250 |         | 2079819 | 2080094 | pduJ        |
| STM3434 | 23.35 | STY4750 |         | 4607047 | 4607496 | rplI        |
| STM2271 | 46.2  | STY4354 |         | 4231386 | 4231580 | yheA        |
| STM1541 | 15.41 | STY0352 |         | 360350  | 360757  |             |
| STM0767 | 13.9  | STY1943 |         | 1833269 | 1833610 |             |
|         |       |         | STY1908 | 1802222 | 1802443 |             |
|         |       | STY1991 |         | 1876603 | 1877022 |             |
| STM2775 | 28.01 | STY2087 |         | 1940462 | 1940815 | yebF        |
| STM4264 | 23.03 | STY1969 |         | 1858166 | 1858453 |             |
| STM3713 | 34.11 | STY2445 |         | 2275995 | 2276117 |             |
| STM4256 | 50.11 |         |         |         |         |             |
| PSLT024 | 25.96 |         |         |         |         |             |
| STM2099 | 13.29 |         |         |         |         |             |
| STM2112 | 9.53  |         |         |         |         |             |
| PSLT058 | 55.95 |         |         |         |         |             |
| PSLT106 | 100   |         |         |         |         |             |
| STM4589 | 12.76 |         |         |         |         |             |
| STM4517 | 4.42  |         |         |         |         |             |
| STM4262 | 19.42 |         |         |         |         |             |

|         |       |          |         |         |                    |
|---------|-------|----------|---------|---------|--------------------|
| STM0657 | 60.1  |          |         |         |                    |
| STM0923 | 40.61 |          |         |         |                    |
| STM1793 | 56.95 | aSTY0787 |         |         |                    |
| STM0689 | 29.59 |          |         |         |                    |
| STM1010 | 71.88 |          |         |         |                    |
| STM0760 | 59.3  | aSTY2857 |         |         |                    |
|         |       | STY3188  | 3054094 | 3055077 | hypothetica        |
|         |       | STY2068  | 1925785 | 1925988 | conserved          |
|         |       | STY2298  | 2127027 | 2128043 | rfbE CDP-tyvelc    |
| STM2713 | 7.18  | STY3685  | 3534809 | 3535240 | putative ph        |
| STM4456 | 10.38 | STY3764  | 3627061 | 3628320 | putative se        |
| STM1757 | 14.85 | STY1293  | 1252901 | 1253230 | hypothetica        |
| STM3911 | 18.44 | aSTY3643 |         |         |                    |
|         |       | STY3671  | 3523748 | 3524554 | possible lip       |
| STM2457 | 20.84 | STY3687  | 3535748 | 3536326 | putative ph        |
|         |       | STY3845  | 3703463 | 3703711 | yiiF putative Cc   |
| STM0437 | 7.92  | STY1360  | 1320252 | 1320752 | hypothetica        |
|         |       | STY1598  | 1541402 | 1541740 | hypothetica        |
| STM2324 | 28.86 | STY3665  | 3519207 | 3519440 | hypothetica        |
| STM1611 | 31.09 | STY3681  | 3533201 | 3533416 | nucE possible se   |
| STM0632 | 23.11 | STY3703  | 3548757 | 3548975 | putative po        |
| STM2996 | 10.71 | STY0202  | 211476  | 212072  | staF putative fir  |
| STM2746 | 16.64 | STY0322  | 335381  | 336058  | hypothetica        |
| STM0438 | 22.1  | STY0478  | 483689  | 483973  | hypothetica        |
|         |       | STY3683  | 3533911 | 3534288 | putative me        |
| STM0947 | 26.12 | STY2895  | 2779174 | 2779416 | hypothetica        |
| STM3822 | 12.3  | STY0204  | 212695  | 213261  | staD putative fir  |
| STM0292 | 10.76 | STY0324  | 336466  | 338997  | Rhs-family         |
| STM0437 | 11.14 | STY0480  | 484300  | 485454  | conserved          |
|         |       | STY1029  | 1020282 | 1020443 | putative ba        |
| STM0970 | 13.74 | STY4219  | 4084900 | 4085547 | putative DN        |
| STM2140 | 6.31  | STY4653  | 4513900 | 4514595 | vexC Vi polysacc   |
|         |       | STY4679  | 4540153 | 4541343 | putative me        |
| STM0039 | 21.11 | STY4831  | 4691877 | 4692197 | hypothetica        |
| STM3508 | 59.26 | STY4875  | 4737702 | 4738667 | putative me        |
| STM2952 | 16.28 | STY4220  | 4085586 | 4085966 | putative re        |
|         |       | STY4596  | 4472078 | 4472347 | hypothetica        |
| STM1049 | 32.38 | STY4259  | 4122975 | 4123346 | hypothetica        |
|         |       | STY4529  | 4417838 | 4418617 | hypothetica        |
| STM2515 | 17.32 | STY4675  | 4537926 | 4538252 | hypothetica        |
|         |       | STY4828  | 4690849 | 4691172 | phage DN           |
| STM2333 | 4.8   | STY4853  | 4716616 | 4717491 | hypothetica        |
| STM3493 | 8.13  | STY0215  | 225332  | 227854  | mrcB penicillin-bi |
| STM0530 | 5.64  | STY0718  | 714919  | 716583  | asnB asparagine    |
| STM2131 | 48.3  | STY0743  | 742195  | 742872  | kdpE KDP opero     |
| STM2962 | 14.8  | STY3946  | 3813583 | 3814845 | putative me        |
| STM2019 | 9.15  | STY2233  | 2063452 | 2064570 | cbiG CbiG prote    |
| STM2480 | 21.05 | STY3993  | 3858242 | 3859744 | uhpB two-compo     |
| STM4123 | 12.38 | STY3901  | 3762923 | 3763915 | asnA asparagine    |
| STM4019 | 8.4   | STY0049  | 48368   | 50407   | putative gly       |



|         |       |          |         |         |      |                          |
|---------|-------|----------|---------|---------|------|--------------------------|
| STM3901 | 18.95 | STY0135  | 137249  | 138973  | ilvI | acetolactat              |
| STM3750 | 52.67 | STY0171  | 174957  | 176363  |      | putative syI             |
| STM4593 | 50.85 |          |         |         |      |                          |
| STM2271 | 16.1  | STY3507  | 3345014 | 3347350 | arcB | aerobic res              |
|         |       | STY3548  | 3387948 | 3389393 | tldD | TldD protei              |
| STM1837 | 80    | STY0678  | 677679  | 677888  | cspE | cold shock               |
| STM1760 | 21.58 |          |         |         |      |                          |
| STM4009 | 5.97  | STY0724  | 723401  | 725068  | glnS | glutaminyI-              |
| STM0568 | 17.03 | STY0752  | 754348  | 755004  |      | conserved                |
| STM0698 | 7.9   | STY0269  | 280765  | 282483  | proS | prolyl-tRNA <sup>P</sup> |
| STM1805 | 13.32 | STY1521  | 1477754 | 1478545 |      | putative req             |
| STM2773 | 4.68  | STY2326  | 2154222 | 2155439 | wcaC | putative gly             |
| STM1777 | 16.75 | STY4938  | 4799424 | 4800580 | sthE |                          |
| STM4260 | 28.62 |          |         |         |      |                          |
| STM2443 | 6.33  | STY0366  | 375618  | 376721  | proB | glutamate t              |
| STM2397 | 6.85  |          |         |         |      |                          |
|         |       | aSTY0306 |         |         |      |                          |
| STM3860 | 20.52 |          |         |         |      |                          |
| STM0940 | 33.59 | STY2899  | 2781435 | 2782364 | virK | virulence p              |
| STM2614 | 67.6  | STY1115  | 1086003 | 1086683 | pipA | conserved                |
| STM3983 | 16.99 | STY1147  | 1108783 | 1109088 | yccD | conserved                |
| STM0325 | 81.85 |          |         |         |      |                          |
| STM2792 | 14.51 | STY2918  | 2799245 | 2799772 |      | conserved                |
| STM2791 | 36.78 | STY1136  | 1099596 | 1101061 | hpcC |                          |
| STM4397 | 24.89 | STY4345  | 4223814 | 4224632 | fkpA | FKBP-type                |
| STM3488 | 21.39 | STY4307  | 4185828 | 4186229 | yrfA | conserved                |
| STM3822 | 21.33 | STY1276  | 1232707 | 1233036 |      | putative se              |
| STM4122 | 46.06 | STY1792  | 1712716 | 1712958 | cedA | cell divisior            |
| STM1148 | 11.48 | STY1184  | 1143268 | 1143828 |      | conserved                |
| STM2378 | 37.6  | STY1236  | 1190105 | 1191346 | fabF | 3-oxoacyl-]              |
| STM2630 | 3.91  | STY1257  | 1212056 | 1213366 |      | ABC transp               |
|         |       | STY1854  | 1764423 | 1764671 |      | hypotheticc              |
| STM0878 | 28.95 | STY4233  | 4099246 | 4099491 | yhhP | conserved                |
| STM0909 | 45.14 |          |         |         |      |                          |
| STM3486 | 7.65  |          |         |         |      |                          |
| STM2758 | 4.36  | STY4417  | 4285286 | 4286935 | pgi  | glucose-6-]              |
| STM0343 | 24.42 | STY4462  | 4347506 | 4349107 | yjcC | putative ex              |
| STM3194 | 10.38 | STY4496  | 4386314 | 4387246 | melR | melibiose c              |
|         |       | STY2607  | 2442302 | 2442820 |      | putative lipi            |
| STM0659 | 12.3  | STY4445  | 4315807 | 4316520 | aphA | class B aci              |
| STM0192 | 11.41 | STY4483  | 4369618 | 4370370 | yjcO | putative ex              |
| STM1469 | 41.58 | STY4685  | 4547439 | 4548875 | aspA | aspartate a              |
| STM0887 | 65.8  | STY0923  | 914718  | 915449  | artI | arginine-bir             |
| STM2597 | 79.7  |          |         |         |      |                          |
|         |       | STY0933  | 924663  | 926315  |      | prismane p               |
| STM1917 | 20.9  | STY3804  | 3667525 | 3668484 |      | putative ca              |
| STM2060 | 13.84 |          |         |         |      |                          |
| STM2011 | 12.65 |          |         |         |      |                          |
|         |       | STY4692  | 4553896 | 4554753 | yjeJ | hypotheticc              |
| STM1226 | 35.6  | STY0911  | 903998  | 905131  | potG | putrescine               |
| STM1032 | 35.13 |          |         |         |      |                          |
| STM1303 | 33.08 | STY0223  | 234219  | 235499  | hemL | glutamate-               |

|         |       |         |         |         |       |               |
|---------|-------|---------|---------|---------|-------|---------------|
| STM0730 | 13.74 | STY0401 | 410564  | 411733  | prpC  | methylcitra   |
| STM0760 | 60.54 | STY1763 | 1686242 | 1687288 | aroH  | 3-deoxy-D-    |
| STM1932 | 46.17 | STY2143 | 1993618 | 1994115 | ftnA  | ferritin      |
| STM2317 | 12.65 | STY2201 | 2039442 | 2040137 | yedJ  | conserved     |
| STM3328 | 13.2  | STY2496 | 2327697 | 2330543 | rscC  | sensor prot   |
| STM1133 | 8.49  |         |         |         |       |               |
| STM0595 | 29.79 | STY2541 | 2374973 | 2376268 | menF  | isochorism    |
|         |       | STY2566 | 2402166 | 2402621 |       | conserved     |
| STM3242 | 39.59 | STY2262 | 2088214 | 2089428 |       | putative pr   |
| STM3211 | 37.52 | STY3049 | 2915077 | 2916069 | rpoS  | RNA polym     |
|         |       | STY0228 | 238277  | 239077  | btuF  | cobalamin     |
| PSLT048 | 5.84  |         |         |         |       |               |
| STM0591 | 39.27 | STY1770 | 1692136 | 1693116 | btuC  | vitamin B12   |
|         |       | STY1098 | 1077560 | 1078018 | mgsA  | methylglyc    |
| STM2875 | 27.46 | STY2988 | 2864110 | 2864997 | sprA  | possible Ar   |
| STM1555 | 50.33 | STY3776 | 3642207 | 3643232 | cytR  | transcriptio  |
| STM4517 | 10.95 | STY2153 | 2000039 | 2000587 | pgsA  | phosphotid    |
| STM1352 | 5.58  | STY3021 | 2893597 | 2895285 | invG  | secretory p   |
| STM4055 | 13.74 | STY1691 | 1616737 | 1617318 | sodB  | superoxide    |
| STM4466 | 21.15 | STY1181 | 1141906 | 1142361 | csgA  | major curlir  |
| STM2206 | 11.36 | STY4068 | 3926357 | 3927166 | mutM  | formamido     |
| STM2548 | 8.73  | STY4079 | 3936674 | 3937372 | waaY  | lipopolysac   |
| STM3343 | 11.26 | STY1590 | 1537773 | 1538717 |       | putative ex   |
| STM4300 | 74.71 | STY1654 | 1583312 | 1584958 | fumA  | Fumarate h    |
| STM4305 | 56.66 | STY1566 | 1515383 | 1517818 | dmsA2 | putative dir  |
|         |       | STY4001 | 3866559 | 3868043 |       | putative ca   |
| STM0912 | 11.67 | STY0353 | 361067  | 361834  |       | possible hy   |
| STM3172 | 12.75 | STY0395 | 403089  | 404093  |       | AraC-famil    |
| STM2320 | 8.14  | STY2216 | 2051109 | 2052566 |       | putative inr  |
| STM0592 | 5.73  | STY2276 | 2101051 | 2102481 | sbcB  | exodeoxyri    |
|         |       | STY0153 | 157097  | 158248  | ftsZ  | cell divisio  |
| STM2143 | 6.41  | STY2553 | 2386919 | 2389651 | nuoG  | NADH dehy     |
| STM2545 | 16.06 | STY0362 | 371982  | 372440  | gpt   | xanthine-gu   |
| STM0981 | 42.72 | STY2188 | 2029691 | 2029960 | fliQ  | flagellar bic |
| STM3121 | 28.21 | STY1578 | 1527260 | 1528159 |       | putative req  |
| STM4454 | 22.81 | STY4351 | 4227264 | 4227734 | rpsG  | 30S riboso    |
| STM2221 | 25.06 | STY3936 | 3799204 | 3800391 | yidY  | putative me   |
| STM3490 | 19.1  | STY0420 | 431706  | 432161  | yail  | conserved     |
| STM3588 | 14.96 | STY0483 | 486733  | 487347  | cyoC  | cytochrome    |
| STM2043 | 6.18  | STY4467 | 4352725 | 4354416 |       | putative so   |
| STM4530 | 36.27 | STY2543 | 2376729 | 2377190 |       | conserved     |
|         |       | STY3441 | 3285273 | 3285737 | gatA  | PTS system    |
| STM2193 | 12.1  |         |         |         |       |               |
| STM3548 | 60.07 | STY1741 | 1661861 | 1662598 |       | Orf 245 pr    |
| STM4304 | 8.3   | STY2753 | 2590945 | 2592294 | xseA  | exodeoxyri    |
| STM1567 | 25.7  | STY0546 | 554197  | 554649  |       | putative me   |
| STM4445 | 34.12 | STY4772 | 4632274 | 4633437 |       | hypothetica   |
| STM1456 | 13.07 | STY3368 | 3210588 | 3211361 |       | putative me   |
| STM4556 | 9.12  | STY3400 | 3245856 | 3246992 | ygjO  | conserved     |
| STM0625 | 32.18 | STY3448 | 3292494 | 3292889 | yraN  | conserved     |
| STM2318 | 3.94  |         |         |         |       |               |
| STM0182 | 8.15  | STY1898 | 1792901 | 1793710 |       | putative req  |

|         |       |          |         |              |               |
|---------|-------|----------|---------|--------------|---------------|
|         |       | STY2530  | 2365663 | 2366562      | conserved     |
|         |       | STY2684  | 2518837 | 2519412      | putative lipi |
| STM0049 | 9.7   | STY4809  | 4669470 | 4670234 miaE | tRNA hydr     |
| STM0322 | 7.9   | STY2914  | 2797347 | 2798024 ygaE | putative tra  |
|         |       | STY4868  | 4730107 | 4731279 iadA | probable is   |
| STM0399 | 13.76 | STY4944  | 4804460 | 4805050 sthA | putative fir  |
| STM2284 | 13.41 | aSTY4143 |         |              |               |
| STM1767 | 12.39 | STY1297  | 1255747 | 1256760      | putative req  |
| STM3629 | 39.35 | STY1368  | 1323500 | 1324465 sapB | peptide tra   |
| STM4117 | 16.97 | STY3825  | 3685526 | 3686362 rhaS | L-rhamnos     |
| STM2253 | 7.78  | STY3882  | 3739595 | 3740503 yihG | putative ac   |
| STM3563 | 11.18 | STY0848  | 842149  | 842907 ybhP  | conserved     |
| STM0664 | 23.7  | STY0830  | 827692  | 828378 bioD  | dethiobiotir  |
| STM3178 | 24.34 | STY0104  | 102087  | 102464 apaG  | CorD prote    |
| STM4039 | 32.09 | STY3836  | 3693908 | 3695080 yiiG | putative lipi |
| STM4408 | 10.8  | STY0692  | 688704  | 689171 ybeA  | conserved     |
| STM0983 | 7.94  | STY0282  | 299187  | 299942 gloB  | probable h    |
| STM0376 | 4.19  | STY0978  | 973145  | 974428 aroA  | 3-phospho     |
| STM2354 | 70.5  | STY2585  | 2420531 | 2421313 argT | lysine-argir  |
| STM1389 | 27.06 | STY2871  | 2740983 | 2741321 smpA | small prote   |
| STM0623 | 51.53 | STY0068  | 69706   | 69999 citD2  | citrate lyas  |
| STM2752 | 38.38 | STY0394  | 402769  | 402993       | hypothetica   |
| STM3884 | 45.37 | STY1986  | 1873161 | 1873325      | hypothetica   |
| STM1512 | 18.97 | STY4209  | 4074184 | 4076226 prlC | oligopeptid   |
| STM2560 | 58    | aSTY0750 |         |              |               |
| STM0626 | 28.14 | STY4501  | 4394294 | 4395013 dcuR | two-compo     |
| STM1908 | 24.21 | STY2144  | 1994161 | 1994400 yecH | conserved     |
| STM2146 | 11.31 | STY1377  | 1330859 | 1331920      | putative me   |
| STM3983 | 11.88 | STY2830  | 2692917 | 2693396 rseC | sigma-E fa    |
| STM0028 | 11.09 | STY1176  | 1138300 | 1139133 csgG | assembly/t    |
| STM3826 | 9.52  | STY3096  | 2962058 | 2964814 barA | sensor prot   |
| STM0324 | 99.1  | aSTY4835 |         |              |               |
| STM3210 | 24.39 |          |         |              |               |
| STM0665 | 42.9  | STY4338  | 4217480 | 4217704      | hypothetica   |
| STM3807 | 11.24 | STY3475  | 3321251 | 3321877 ftsJ | cell divisio  |
| STM4044 | 27.32 | STY2257  | 2084401 | 2085513 pduQ | putative pro  |
| STM2064 | 42.67 | STY4477  | 4363333 | 4364004 nrfC | cytochrome    |
| STM0096 | 19.84 | STY2183  | 2026681 | 2027148 fliL | FliL protein  |
| STM3594 | 19    | STY1549  | 1500659 | 1502710 dcp  | dipeptidyl c  |
| STM0585 | 4.71  | STY3744  | 3601247 | 3603091 btuB | vitamin B1    |
| STM0958 | 6.33  | STY0655  | 655371  | 656936 ahpF  | alkyl hydro   |
| STM0851 | 49.04 | STY1306  | 1267159 | 1268066 oppC |               |
| STM2977 | 8.89  | STY3798  | 3663229 | 3664821 ydeV | putative su   |
| STM1368 | 11.75 | STY3592  | 3444898 | 3445710 ysgA | putative hy   |
| STM3912 | 30.88 | STY3608  | 3461790 | 3463952 uvrD | DNA helica    |
| STM3458 | 44.86 | STY0100  | 98069   | 98599 yabF   | putative N/   |
| STM3749 | 33.88 | STY3215  | 3083507 | 3084091      | conserved     |
| STM1185 | 29.93 | STY2179  | 2022808 | 2023515 fliH | flagellar as  |
| STM2440 | 27.15 | STY2666  | 2504048 | 2505019 cysK | cysteine sy   |
| STM3003 | 37.47 | STY2668  | 2505709 | 2507437      |               |
| STM2445 | 9.29  | STY1333  | 1290578 | 1291339      | hypothetica   |
| STM1975 | 12.43 | STY3080  | 2943509 | 2944180      | conserved     |

|         |       |         |         |         |               |
|---------|-------|---------|---------|---------|---------------|
| STM4541 | 25.6  | STY3077 | 2941776 | 2942138 | putative 6-φ  |
| STM3205 | 9.12  | STY3866 | 3722353 | 3723228 | hypothetica   |
| STM0736 | 27.14 | STY2121 | 1972780 | 1973172 | flagellar pro |
| STM2494 | 3.66  | STY1409 | 1359382 | 1360365 | putative me   |
| STM4491 | 3.47  |         | 1467383 | 1468555 | hypothetica   |
| STM1299 | 24.13 |         | 1815290 | 1816459 | glutamate (   |
| STM3771 | 23.55 | STY1959 | 1850137 | 1851105 | PTS system    |
| STM2907 | 37.89 | STY1984 | 1872287 | 1872937 | serine/threi  |
| STM0994 | 24.18 | STY2108 | 1959515 | 1959967 | DATP pyro     |
| STM2352 | 28.87 | STY0921 | 913327  | 913995  | arginine tra  |
| STM3776 | 10.36 | STY0568 | 574305  | 575552  | probable m    |
| STM4248 | 55.15 | STY1000 | 998923  | 1000113 | aspartate a   |
| STM0597 | 10.49 | STY0632 | 633715  | 634851  | fepE          |
| STM0546 | 38.9  | STY0371 | 380898  | 383459  | stbC          |
| STM2242 | 5.8   | STY1507 | 1465441 | 1466622 | outer mem     |
| STM1679 | 50.07 | STY1304 | 1264354 | 1266102 | putative an   |
| STM1539 | 66.65 | STY1913 | 1806430 | 1807548 | periplasmic   |
| STM0343 | 23.18 | STY1957 | 1846482 | 1848083 | conserved     |
| STM1489 | 3     | STY1419 | 1368017 | 1371541 | probable p    |
| STM2894 | 6.45  | STY1385 | 1338604 | 1339533 | putative ox   |
|         |       | STY0543 | 549979  | 550815  | probable se   |
| STM1373 | 53.16 | STY3124 | 2991494 | 2992699 | possible ar   |
| STM2706 | 17.49 |         |         |         |               |
|         |       | STY0291 | 306935  | 307759  | hypothetica   |
| STM2758 | 8.75  | STY0446 | 456394  | 457365  | protein-exp   |
|         |       | STY3319 | 3166378 | 3167556 | probable h    |
| STM1514 | 37.7  | STY2951 | 2828899 | 2829396 | ygaD          |
| STM3886 | 11.5  | STY4164 | 4022959 | 4023966 | putative lac  |
| STM3601 | 16.65 |         |         |         |               |
| STM2562 | 12.81 | STY4057 | 3918003 | 3918887 | putative be   |
| STM4053 | 34.08 |         |         |         |               |
| STM1256 | 10.91 | STY3152 | 3022923 | 3024125 | ygeD          |
| STM2474 | 71.3  | STY3236 | 3100337 | 3102328 | tktA          |
|         |       | STY2967 | 2844595 | 2845065 | hycl          |
| STM1188 | 16.89 | STY4155 | 4013855 | 4014565 | yiaF          |
| STM2791 | 27.96 | STY4116 | 3978586 | 3980124 | aldB          |
| STM4446 | 41.2  | STY4017 | 3879146 | 3880255 | putative tra  |
| STM2414 | 12.39 | STY3119 | 2987534 | 2988244 | fucR          |
|         |       |         | 3048066 | 3048647 | stdA          |
| STM3930 | 30.25 | STY2435 | 2265246 | 2266715 | lysP          |
|         |       |         |         |         |               |
| STM0618 | 6.76  | STY2444 | 2275328 | 2275993 | putative me   |
| STM1895 | 19.62 | STY4063 | 3923120 | 3923575 | dut           |
| STM4283 | 25.66 | STY4363 | 4236009 | 4236341 | rplV          |
| STM4385 | 11.07 | STY4721 | 4584061 | 4585065 | hflC          |
|         |       | STY4384 | 4246242 | 4246625 | rplQ          |
|         |       | STY0937 | 930310  | 931428  | ybjY          |
| STM1992 | 4.39  | STY4723 | 4585444 | 4586742 | purA          |
| STM2959 | 62.98 | STY3429 | 3272367 | 3273512 | conserved     |
| STM2529 | 14.73 | STY3320 | 3167546 | 3168532 | hybA          |
| STM2752 | 30.95 | STY2954 | 2831756 | 2832727 | srlE          |
| STM3768 | 40.87 | STY4785 | 4643662 | 4644780 | hypothetica   |

|         |       |          |          |         |       |                  |
|---------|-------|----------|----------|---------|-------|------------------|
|         |       | STY4926  | 4786070  | 4787452 | radA  | putative DN      |
| STM0498 | 50.91 |          |          |         |       |                  |
|         |       | STY2966  | 2843759  | 2844538 |       | putative ex      |
| STM0264 | 9.52  | STY2443  | 2274082  | 2275263 | yeiO  | sugar efflu;     |
| STM2421 | 3.5   | STY2300  | 2128914  | 2130227 | rfbH  | putative de      |
| STM2098 | 11.18 | STY2302  | 2131338  | 2132111 | rfbF  | glucose-1- $\pi$ |
| STM2402 | 11.8  | STY2381  | 2212679  | 2213290 | stcA  | putative fir     |
| STM1576 | 66.19 | STY1287  | 1242299  | 1243696 | narK  | nitrite extru    |
| STM3857 | 5.8   | STY4130  | 3992233  | 3993231 |       | putative ca      |
| STM3478 | 8.56  | STY4236  | 4103634  | 4104260 |       | putative me      |
| STM3681 | 10.11 | STY3516  | 3359426  | 3360310 |       | possible kir     |
| STM3162 | 61.82 | STY3406  | 3252690  | 3253352 |       | putative me      |
| STM1991 | 20.48 | STY1718  | 1639257  | 1639673 | sseE  | putative pa      |
| STM2649 | 17.26 | STY1152  | 1113151  | 1113657 | scsD  | secreted pi      |
| STM2885 | 5.23  | STY0824  | 821251   | 822771  | hutH  | histidine ar     |
| STM2015 | 58.04 | STY0878  | 868409   | 869329  | ybiS  | putative ex      |
| STM0671 | 49.99 | STY3213  | 3080990  | 3082168 | visB  | 2-octapren       |
| STM3300 | 7.73  | STY1137  | 1101063  | 1101914 | hpcB  | 3,4-dihydro      |
| STM0787 | 8.31  | STY0820  | 816437   | 817660  | hutI  | imidazoloni      |
| STM4347 | 4.81  | STY0865  | 856198   | 858420  |       | putative me      |
| STM3544 | 10.27 | STY1463  | 1414042  | 1414440 | ugtL  | putative me      |
| STM2206 | 21.05 | STY3438  | 3282983  | 3283789 |       | PTS-transp       |
| STM3260 | 15.96 | STY3365  | 3207757  | 3208428 |       | possible lip     |
| STM2055 | 58.13 | STY2706  | 2538722  | 2539057 | eutS  | putative etf     |
| STM3349 | 35.56 | STY2534  | 2368909  | 2369166 | pmrD  | polymyxin I      |
| STM4579 | 4.81  | STY3916  | 3776797  | 3778167 | glmU  | UDP-N-ace        |
| STM2959 | 26.21 | STY0463  | 469625   | 469867  | xseB  | exodeoxyri       |
| STM0113 | 40.01 | STY2930  | 2804753  | 2804998 | nrdH  | putative gl      |
|         |       | STY0496  | 503315   | 503713  |       | conserved        |
| STM0766 | 91    |          |          |         |       |                  |
| STM0929 | 19.94 | STY4369  | 4238474  | 4238788 | rplX  | 50S riboso       |
| STM0401 | 30.14 | STY4367  | 4237674  | 4237928 | rpsQ  | 30S riboso       |
|         |       | STY4760  | 4617488  | 4617874 | ytfH  | conserved        |
| STM3618 | 37.97 | STY2382  | 2213488  | 2213769 | yehE  | conserved        |
| STM0658 | 20.91 | STY2139  | 1990631  | 1990873 | araH  |                  |
|         |       | STY1086  | 1065862  | 1066425 |       | putative lip     |
| STM3577 | 18    | STY2846  | 2709655  | 2709978 | yfiM  | conserved        |
| STM4248 | 28.53 | STY1679  | 1607046  | 1607282 |       | conserved        |
| STM0945 | 35.04 | STY3774  | 3639438  | 3639650 | rpmE  | 50S riboso       |
| STM1460 | 28.31 | STY4500a | 4393711  | 4393977 |       | hypothetica      |
| STM4091 | 14.28 | STY0491  | 496233   | 497504  | clpX  | ATP-deper        |
| STM1513 | 77.46 | STY1323  | 1279968  | 1280150 |       | conserved        |
| STM2935 | 30.05 | STY1849  | 1762007  | 1762189 |       | conserved        |
| STM1868 | 39.57 |          |          |         |       |                  |
|         |       |          | aSTY4610 |         |       |                  |
| STM3685 | 32.69 | STY0262  | 277638   | 277892  | rof   | ROF protei       |
| STM0031 | 45.04 | STY0017  | 17049    | 17492   |       | putative me      |
| STM3816 | 96.39 | STY2477  | 2308342  | 2308554 | ccmD1 | heme expo        |
|         |       | STY0391  | 400126   | 400227  |       | hypothetica      |
| STM3920 | 45.05 | STY1125  | 1090875  | 1090985 |       | hypothetica      |
| STM0194 | 36.43 | STY4246  | 4111579  | 4111713 |       | hypothetica      |
| STM2791 | 17.08 | STY1982  | 1871727  | 1871966 |       | conserved        |

|         |       |          |         |         |                   |
|---------|-------|----------|---------|---------|-------------------|
| STM3698 | 17.25 |          |         |         |                   |
| STM2589 | 11.49 |          |         |         |                   |
| STM4489 | 32.61 |          |         |         |                   |
| STM4125 | 5.82  |          |         |         |                   |
| STM4417 | 6.94  |          |         |         |                   |
| STM4103 | 17.67 |          |         |         |                   |
| STM3973 | 7.89  |          |         |         |                   |
| STM3334 | 7.12  |          |         |         |                   |
| STM2702 | 17.73 |          |         |         |                   |
| STM0286 | 17.63 |          |         |         |                   |
| STM0322 | 18.36 |          |         |         |                   |
| STM2560 | 64.73 | STY0750  | 751779  | 753260  | PTR2-fami         |
| STM1347 | 56.9  | aSTY0801 |         |         |                   |
| STM3626 | 41.64 | STY0887  | 880435  | 882306  | hypothetica       |
| STM0981 | 7.09  |          |         |         |                   |
| STM1951 | 45.41 | aSTY0924 |         |         |                   |
| STM2620 | 58.73 | STY2052  | 1916228 | 1916827 | hypothetica       |
| STM0546 | 5.94  | STY3614  | 3467657 | 3469666 | possible ex       |
| STM0084 | 12.7  | STY2355  | 2190874 | 2191476 | putative ex       |
| STM2515 | 9.86  | STY2756  | 2597945 | 2599525 | conserved         |
| STM0725 | 10.6  | STY3006  | 2878765 | 2879787 | pathogenic        |
| STM2151 | 27.81 | STY0206  | 215914  | 216648  | chaperone         |
| STM2814 | 9.08  | STY2104  | 1956684 | 1957358 | putative m        |
|         |       | STY2357  | 2191793 | 2192488 | hypothetica       |
|         |       | aSTY2761 |         |         |                   |
| STM0177 | 6.1   | STY3065  | 2926948 | 2927865 | conserved         |
| STM2514 | 23.24 | STY0295  | 311664  | 311762  | hypothetica       |
| STM3633 | 14.35 | STY0332  | 341669  | 342163  | safA probable liq |
| STM3845 | 15.21 | STY2350  | 2188394 | 2189170 | putative ex       |
|         |       | STY2731  | 2567612 | 2568880 | putative pe       |
| STM4533 | 6.87  | STY2888  | 2766884 | 2768056 | putative ba       |
| STM3983 | 10.07 | STY1364  | 1322110 | 1322535 | hypothetica       |
| STM3040 | 33.67 | STY1600  | 1541983 | 1542177 | hypothetica       |
|         |       | STY1617  | 1553459 | 1554280 | hypothetica       |
| STM3446 | 11.98 | STY2749  | 2586659 | 2587348 | conserved         |
| STM0116 | 16.02 | STY3924  | 3787485 | 3788255 | putative sh       |
| STM1871 | 3.85  | STY1413  | 1363893 | 1365452 | hypothetica       |
| STM3241 | 24.82 | STY1602  | 1542833 | 1543120 | hypothetica       |
|         |       | STY1619  | 1554956 | 1556071 | hypothetica       |
|         |       | STY1636  | 1568099 | 1568677 | putative ba       |
| STM2521 | 5.33  | STY4630  | 4496774 | 4497838 | hypothetica       |
|         |       | STY4535  | 4421920 | 4422138 | hypothetica       |
|         |       | STY4566  | 4445726 | 4446088 | putative m        |
| STM0268 | 8.46  | STY4584  | 4460652 | 4461266 | conserved         |
| STM3445 | 8     | STY4601  | 4474723 | 4475823 | putative re       |
| STM2345 | 8.49  | STY4413  | 4279819 | 4280682 | conserved         |
| STM1868 | 38.53 | STY4610  | 4482721 | 4483128 | putative ph       |
| STM3817 | 17.05 | STY4637  | 4503086 | 4503670 | putative ex       |
|         |       | STY4544  | 4428630 | 4429100 | pilP pilus assen  |

|         |       |          |         |         |                    |
|---------|-------|----------|---------|---------|--------------------|
| STM1922 | 6.85  | STY4563  | 4444208 | 4444966 | putative me        |
|         |       | STY4580  | 4458133 | 4458522 | putative me        |
| STM1997 | 58.87 | STY4597  | 4472479 | 4473753 | samB UV protecti   |
|         |       | STY1092  | 1071410 | 1071919 | sulA cell divisior |
| STM2442 | 17.98 | STY4423  | 4291869 | 4292759 | malG maltose tra   |
| STM2343 | 4.48  | STY0164  | 168274  | 169476  | hofC protein trar  |
| STM4052 | 7.14  | STY0195  | 205292  | 206062  | yadH ABC transp    |
| STM0590 | 48.11 | STY0219  | 230387  | 231184  | fhuC ferrichrome   |
| STM0512 | 51.57 | STY0273  | 284675  | 285313  | yaeE putative AE   |
| STM2164 | 3.71  | STY3555  | 3398469 | 3400490 | yhdA putative lipi |
| STM2562 | 20.96 | STY0703  | 699294  | 701222  | putative sig       |
|         |       | STY0722  | 720111  | 720911  | nagB glucosamir    |
| STM0545 | 51.19 |          |         |         |                    |
| STM2774 | 41.65 | STY3939A | 3804326 | 3804466 | rpmH 50s ribosor   |
| STM2204 | 63.65 | STY3925  | 3788304 | 3789677 | probable P         |
| STM3669 | 7.92  |          |         |         |                    |
| STM3518 | 19.84 | STY3933  | 3796779 | 3797363 | conserved          |
| STM2190 | 13.12 | STY3894  | 3753726 | 3754616 | rbsB D-ribose-bi   |
|         |       | STY4082  | 3939632 | 3940846 | waaL O-antigen l   |
| STM1009 | 16.42 | STY0248  | 261798  | 262283  | ompH outer mem     |
| STM1909 | 19.72 | STY0141  | 142759  | 143124  | ftsL cell divisior |
| STM0297 | 48.71 |          |         |         |                    |
| STM0615 | 5.43  | STY2910  | 2791739 | 2793007 | ygaF putative G/   |
| STM0595 | 15.47 | STY1583  | 1531158 | 1531979 | putative se        |
| STM3551 | 8.22  | STY4359  | 4233956 | 4234561 | rpID 50S riboso    |
| STM1130 | 25.58 | STY4316  | 4194492 | 4194662 | yhfL conserved     |
| STM3766 | 62.18 | STY4288  | 4162727 | 4163653 | conserved          |
| STM3411 | 33.91 |          |         |         |                    |
|         |       | STY4335  | 4215901 | 4216780 | yheT               |
| STM2497 | 9.02  | STY4298  | 4176228 | 4177160 | heat shock         |
| STM2936 | 30.77 | STY1867  | 1775546 | 1775860 | putative lipi      |
| STM3966 | 43.57 | STY1829  | 1746826 | 1748022 | putative req       |
|         |       | STY2331  | 2159475 | 2160614 | wza putative po    |
| STM3792 | 12.59 |          |         |         |                    |
| STM0428 | 42.87 | STY4257  | 4121171 | 4122241 | ugpC sn-Glycero    |
| STM3211 | 4.51  | STY2333  | 2162954 | 2164810 | asmA putative ou   |
|         |       | STY4616  | 4487247 | 4487693 | putative ph        |
| STM1914 | 18.05 | STY0310  | 324392  | 325159  | hypothetica        |
|         |       | STY0358  | 367097  | 368152  | dinP hypothetica   |
| STM3963 | 7.84  | STY2324  | 2153034 | 2154247 | wcaD               |
| STM4157 | 56.18 |          |         |         |                    |
| STM3844 | 32.3  |          |         |         |                    |
| STM3201 | 20.61 |          |         |         |                    |
| STM2589 | 58.98 |          |         |         |                    |
| STM2001 | 15.79 | STY1106  | 1081781 | 1083271 | putative tra       |
|         |       | STY0902  | 896385  | 897005  | putative tet       |
| STM2600 | 71.43 |          |         |         |                    |
| STM2272 | 13.45 | STY0928  | 918214  | 919227  | putative ox        |
| STM2984 | 18.99 | STY2789  | 2645566 | 2646780 | putative L-c       |
| STM1421 | 14.55 |          |         |         |                    |
| STM0141 | 16.76 | STY2752  | 2589318 | 2590790 | guaB inosine-5'-r  |

|         |       |         |         |         |      |              |
|---------|-------|---------|---------|---------|------|--------------|
| STM2684 | 14.59 | STY0987 | 983712  | 984944  | ycaQ |              |
| STM0912 | 47.88 |         |         |         |      |              |
|         |       | STY2973 | 2849437 | 2851263 | hycC | formate hy   |
| STM3521 | 5.16  | STY3047 | 2913358 | 2914785 |      | conserved    |
| STM3076 | 70.98 | STY2711 | 2543707 | 2545707 | tktB | transketola  |
| STM0272 | 21.08 | STY0943 | 934397  | 936673  | clpA | ATP-deper    |
| STM4081 | 7.35  | STY0991 | 986132  | 987025  |      | conserved    |
| STM0914 | 20.01 |         |         |         |      |              |
| STM1828 | 17.93 |         |         |         |      |              |
| STM2174 | 12.53 | STY4439 | 4309084 | 4310082 | yjbN | conserved    |
| STM4494 | 23.84 | STY4781 | 4640729 | 4641031 |      | hypothetica  |
| STM2316 | 18.16 | STY2548 | 2382686 | 2384527 | nuoL | NADH dehy    |
| STM4385 | 41.42 | STY2574 | 2411709 | 2412152 |      | putative su  |
| STM1460 | 8.11  | STY1153 | 1113790 | 1115031 | agp  | glucose-1-p  |
| STM2774 | 14.17 | STY1861 | 1770057 | 1770647 |      | putative AE  |
| STM0013 | 24.39 | STY1148 | 1109088 | 1110080 | cbpA | curved DN    |
|         |       | STY1088 | 1066946 | 1067464 | fabA | D-3-hydrox   |
| STM2670 | 11.76 | STY2761 | 2611836 | 2612810 | sinI | putative ex  |
| STM0543 | 28.67 | STY0031 | 29998   | 30516   | bcfF | fimbrial sut |
| STM4551 | 14.77 |         | 2033361 | 2035064 |      | putative me  |
|         |       | STY2275 | 2098342 | 2100684 | sopA |              |
| STM2746 | 10.84 |         | 2337200 | 2337894 |      |              |
| STM2851 | 26.58 | STY2196 | 2035491 | 2036420 |      |              |
| STM3235 | 32.16 | STY2278 | 2104261 | 2105175 |      | putative tra |
| STM0714 | 5.76  | STY2509 | 2342844 | 2344034 |      | putative tra |
| STM1880 | 8.26  | STY2545 | 2378234 | 2379238 |      | putative rec |
| STM2959 | 7.42  | STY2588 | 2423668 | 2424771 |      | conserved    |
| STM0095 | 27.39 |         | 1183119 | 1184078 | rluC | ribosomal l  |
| STM2497 | 19.25 | STY1213 | 1168522 | 1168938 | flgB | putative fla |
| STM4009 | 6.46  | STY4352 | 4227831 | 4229945 | fusA | elongation   |
| STM0284 | 13.89 | STY0373 | 384266  | 384802  | stbA | probable fir |
| STM0622 | 11.96 | STY0184 | 193338  | 194609  | ygbK | conserved    |
| STM0217 | 4.67  | STY0484 | 487337  | 489328  | cyoB | cytochrome   |
| STM2182 | 48.62 | STY4470 | 4355905 | 4356594 |      | putative me  |
| STM3168 | 7.25  | STY4400 | 4263539 | 4264468 | metA | homoserine   |
| STM0452 | 6.18  | STY0161 | 165611  | 166354  | yacF | conserved    |
|         |       | STY2531 | 2366559 | 2368205 | pqaB | melittin res |
| STM1360 | 50.76 |         |         |         |      |              |
| STM2810 | 7.53  | STY1686 | 1612708 | 1613805 | nemA | N-ethylmal   |
| STM2316 | 9.37  | STY0435 | 444752  | 446071  | brnQ | branched c   |
| STM1410 | 28.92 |         | 1634467 | 1635141 |      | putative pa  |
| STM3556 | 16.98 | STY4424 | 4292774 | 4294318 | malF | maltose tra  |
| STM2263 | 9.12  | STY0367 | 376733  | 377983  | proA | gamma-glu    |
| STM4091 | 9.94  | STY0188 | 197204  | 198064  | speE | spermidine   |
| STM1082 | 15.51 | STY2208 | 2045940 | 2046737 |      | conserved    |
| STM3129 | 9.21  | STY2644 | 2478574 | 2479539 | glk  | glucokinase  |
|         |       | STY2537 | 2371590 | 2372447 | menB | naphthoate   |
| STM1301 | 21.37 | STY2525 | 2360194 | 2360619 |      | conserved    |
| STM4404 | 18.58 | STY2792 | 2648547 | 2649350 | suhB | extragenic   |
| STM3603 | 12.2  | STY4811 | 4670479 | 4670967 |      | putative ex  |
| STM4050 | 15.32 | STY0583 | 590950  | 591672  | ybbF | conserved    |



|         |       |          |         |         |              |
|---------|-------|----------|---------|---------|--------------|
| STM0921 | 69.5  |          |         |         |              |
| STM1187 | 11.03 | STY4917  | 4776186 | 4777736 | conserved    |
|         |       | STY4095  | 3953100 | 3954119 | gpsA         |
| STM3264 | 3.93  | STY4193  | 4056943 | 4059003 | putative me  |
| STM3534 | 29.76 | STY4282  | 4154270 | 4156663 | malP         |
| STM0421 | 33.95 | STY2647  | 2482830 | 2483828 | putative ior |
| STM4120 | 11.23 | STY2721  | 2558007 | 2559134 | dapE         |
| STM0076 | 15.17 | STY0957  | 947280  | 947774  | lrp          |
| STM2551 | 6.46  | STY0618  | 617263  | 618510  | ybdG         |
| STM3903 | 12.09 | STY4776  | 4637257 | 4637880 | yjga         |
| STM2684 | 15.7  |          | 4760097 | 4760636 | dnaT         |
| STM4211 | 20.36 | STY4060  | 3920902 | 3921618 | rph          |
| STM0777 | 17.2  | STY3391  | 3235872 | 3236378 | mug          |
| STM4112 | 32.06 | STY3437  | 3281569 | 3282996 |              |
| STM4009 | 5.42  | STY4059  | 3919913 | 3920776 |              |
| STM2042 | 4.68  |          |         |         |              |
| STM2406 | 24.34 | STY0136  |         |         |              |
|         |       | STY3011  | 138973  | 139467  | ilvH         |
| STM0841 | 3.63  | STY0779  | 2884590 | 2885381 | spaR         |
| STM3750 | 18.93 | STY4498  | 776527  | 779328  | sucA         |
| STM4098 | 12.72 | STY2862  | 4388954 | 4390384 | melB         |
| STM1497 | 4.14  | STY2796  | 2731953 | 2732510 | yfjA         |
| STM1947 | 11.18 | STY2281  | 2652431 | 2653444 | asrC         |
| STM1572 | 45.4  | STY0365  | 2107398 | 2108702 | hisD         |
| STM4104 | 10.15 | STY0539  | 374283  | 375335  | phoE         |
|         |       | STY1079  | 546660  | 548311  | ushA         |
|         |       | STY4519  | 1056001 | 1057011 | pyrD         |
| STM2444 | 56.3  | STY3808  | 4408055 | 4408870 | phoN         |
| STM2314 | 10.51 | STY0714  | 3670951 | 3671940 | sbp          |
| STM2126 | 13.79 | STY0764  | 709510  | 709983  |              |
| STM4592 | 8.53  | STY2244  | 763368  | 764078  |              |
|         |       | STY4510  | 2073815 | 2074516 | pduB         |
| STM0891 | 49.51 | STY2159  | 4401582 | 4402982 |              |
| STM3607 | 37.12 | STY1386  | 2004839 | 2005591 |              |
| STM2689 | 1.63  | aSTY4459 | 1339652 | 1340557 |              |
| STM0624 | 48.72 | STY0067  |         |         |              |
| STM3084 | 41.37 |          | 68633   | 69676   | citC2        |
|         |       | STY3709  |         |         |              |
| STM4477 | 35.95 | STY2782  | 3558479 | 3560068 | purH         |
| STM4524 | 12.6  | STY2247  | 2640339 | 2641622 | yfhl         |
| STM4325 | 20.03 | STY4500  | 2076899 | 2077420 | pduE         |
| STM0618 | 12.74 | STY2140  | 4392224 | 4393564 | dcuB         |
| STM4483 | 41.73 | STY1234  | 1991102 | 1991659 |              |
| STM3353 | 20.85 | STY1400  | 1188893 | 1189627 | fabG         |
| STM2668 | 3.45  | STY2854  | 1352022 | 1352624 |              |
| STM2816 | 14.97 | STY0005  | 2724137 | 2725297 | pheA         |
| STM0864 | 39.27 | STY3988  | 5114    | 5887    | yaaA         |
| STM0071 | 26.18 | STY1648  | 3853107 | 3853892 |              |
| STM1570 | 75.5  | STY3839  | 1575901 | 1576260 |              |
| STM4347 | 7.95  | STY3590  | 3697528 | 3700578 | fdoG         |
| STM3705 | 6.04  | STY3623  | 3442308 | 3443738 | yigN         |
|         |       |          | 3476682 | 3477851 | hemX         |

|         |       |                    |                              |                    |                    |              |                               |
|---------|-------|--------------------|------------------------------|--------------------|--------------------|--------------|-------------------------------|
| STM4055 | 10.55 | STY3226<br>STY2184 |                              | 3092747<br>2027153 | 3093826<br>2028157 | fba<br>fliM  | fructose 1,6-<br>flagellar mo |
| STM2367 | 10.27 |                    | STY2665                      | 2502914            | 2503675            | cysZ         | putative su                   |
| STM1536 | 51.8  | STY1916            |                              | 1810085            | 1810681            | hyaD         | hydrogenas                    |
| STM0145 | 8.56  | STY3468            |                              | 3312124            | 3313626            | nusA         | L factor                      |
| STM3243 | 31.76 | STY3109            |                              | 2976309            | 2977598            | sdaC         | putative se                   |
| STM3171 | 56.96 | STY3820            |                              | 3680729            | 3682036            |              | possible int                  |
| STM1361 | 8.16  | STY3584            |                              | 3437411            | 3438190            | tatC         | sec-indepe                    |
| STM0692 | 6.69  | STY3601            |                              | 3455088            | 3456917            | recQ         | ATP-deper                     |
| STM1893 | 24.63 | STY3603            |                              | 3458035            | 3458502            | yigI         | conserved                     |
| STM4578 | 11.97 | STY0533            |                              | 539940             | 540902             | hemH         | ferrochelate                  |
| STM3445 | 98.92 | STY3739<br>STY2178 | STY4353                      | 3589422<br>2021820 | 3590660<br>2022815 | tufB<br>fliG | elongation<br>flagellar mo    |
| STM2384 | 4.06  | STY3075            |                              | 2937829            | 2939541            | cysI         | sulfite redu                  |
| STM4496 | 17.64 | STY3137            |                              | 3012345            | 3012980            | ppdB         | prepilin pep                  |
| STM2374 | 26.87 | STY1375            |                              | 1329002            | 1329316            | pspE         | phage shock                   |
| STM3879 | 9.34  | STY0547            |                              | 554646             | 555563             |              | putative me                   |
| STM1480 | 10.59 | STY0574            |                              | 581149             | 581934             |              | conserved                     |
| STM3770 | 49.14 |                    |                              |                    |                    |              |                               |
| STM1952 | 13.21 | STY1435<br>STY1340 |                              | 1386954<br>1301009 | 1387634<br>1301599 |              | putative arr<br>GTP cyclot    |
| STM1580 | 69.8  | STY1291            |                              | 1250066            | 1250743            | narI         | respiratory                   |
| STM4062 | 5.22  | STY1929            |                              | 1821412            | 1823145            |              | putative Na <sup>+</sup>      |
| STM2129 | 12.88 | STY1963<br>STY1995 |                              | 1853695<br>1878054 | 1854315<br>1879214 |              | putative me                   |
| STM3618 | 12.91 | STY2115            |                              | 1965952            | 1966731            | cutC         | putative co                   |
| STM2332 | 6.03  | STY0535            |                              | 542023             | 543327             | gsk          | inosine-gua                   |
| STM1791 | 28.16 | STY1530            |                              | 1485050            | 1486111            | hyaF2        | hydrogenas                    |
| STM0256 | 13.08 | STY1537            |                              | 1491328            | 1492200            |              | putative req                  |
| STM3241 | 71.57 | STY0973            |                              | 965607             | 967889             | pflB         | formate aci                   |
| STM0061 | 64.64 | STY0670            |                              | 668594             | 670123             | citF         | citrate lyas                  |
| STM3320 | 19.28 | STY1501            |                              | 1457501            | 1457830            |              | putative se                   |
| STM4106 | 4.25  | STY1471            |                              | 1421481            | 1424462            | srfB         | putative vir                  |
| STM0174 | 6.36  | STY4205            |                              | 4070227            | 4071579            | gor          | glutathione                   |
| STM3747 | 12.31 | STY4166            |                              | 4025298            | 4026622            |              |                               |
| STM4113 | 12.53 |                    |                              |                    |                    |              |                               |
| STM0850 | 8.37  | STY4064            |                              | 3923556            | 3924779            | dfp          | conserved                     |
| STM3742 | 26.04 | STY3094<br>STY2867 |                              | 2958419<br>2736857 | 2960653<br>2737414 | relA         | GTP pyrop                     |
| STM1154 | 60.17 |                    | STY0414                      | 427110             | 428309             |              | hypothetica                   |
| STM0438 | 11.03 |                    | aSTY0477; aSTY0478; aSTY0476 |                    |                    |              | possible ef                   |
| STM2127 | 11.07 | STY0507            |                              | 513755             | 515041             | amtB         | probable ai                   |
| STM2425 | 7.28  |                    |                              |                    |                    |              |                               |
| STM4086 | 11.76 | STY4138            |                              | 4002503            | 4003957            | xyIB         | xylulose kir                  |
| STM0126 | 1.93  |                    | STY4105                      | 3963524            | 3966847            | sapB         | putative au                   |
| STM1556 | 18.36 | STY4745<br>STY0421 |                              | 4605311<br>432346  | 4605586<br>432891  | yjfY<br>aroL | conserved                     |
| STM2406 | 34.95 | STY0460            |                              | 465808             | 466782             |              | shikimate k                   |
| STM4100 | 28.99 |                    | STY3333                      | 3176677            | 3177864            | metC         | putative ox                   |
| STM2327 | 31.65 | STY2969            |                              | 2845465            | 2846232            | hycG         | beta-cystat                   |
| STM0160 | 4.62  | STY4134            |                              | 3996312            | 3998339            | malS         | formate hy                    |
| STM4468 | 42.15 | STY3515            |                              | 3358962            | 3359429            |              | alpha-amyl<br>conserved       |

|         |       |         |          |         |         |              |
|---------|-------|---------|----------|---------|---------|--------------|
| STM0231 | 10.96 | STY3446 |          | 3289558 | 3290421 | conserved    |
| STM2013 | 20.8  | STY3326 |          | 3172165 | 3172659 | putative me  |
| STM0191 | 31.75 | STY0396 |          | 404257  | 406347  | foxA         |
| STM3229 | 45.35 | STY2925 |          | 2802217 | 2802543 | conserved    |
| STM4448 | 21.2  | STY2436 |          | 2266905 | 2267768 | yeiE         |
| STM1787 | 2.54  |         | aSTY0405 |         |         | putative tra |
| STM4106 | 7.22  | STY2413 |          | 2244749 | 2245633 | cdd          |
| STM0478 | 8.13  | STY2294 |          | 2122074 | 2123018 | rfbN         |
| STM3747 | 5.97  | STY2370 |          | 2200548 | 2201600 | fbaB         |
| STM3384 | 17    | STY2404 |          | 2236307 | 2237245 | yohl         |
| STM2530 | 18.15 | STY4381 |          | 4244143 | 4244532 | rpsK         |
| STM2107 | 3     | STY2320 |          | 2149592 | 2150557 | fcl          |
|         |       | STY2397 |          | 2229320 | 2231050 | dld          |
| STM0055 | 4.57  | STY0283 |          | 299977  | 300699  | conserved    |
| STM2913 | 6.69  | STY4176 |          | 4035317 | 4036996 | yhjU         |
| STM1569 | 12.65 | STY4265 |          | 4129571 | 4130059 | putative ac  |
| STM0007 | 6.74  | STY3486 |          | 3329421 | 3330680 | murA         |
| STM2344 | 39.56 | STY4741 |          | 4602503 | 4602967 | sgaA         |
| STM3335 | 43.52 | STY4806 |          | 4667299 | 4667751 | conserved    |
|         |       | STY4934 |          | 4795360 | 4795833 | creA         |
| STM0937 | 23.04 | STY4052 |          | 3914577 | 3915200 | gmk          |
| STM2898 | 13.82 | STY3476 |          | 3321965 | 3322297 | conserved    |
| STM3314 | 44.57 | STY3408 |          | 3253884 | 3254252 | putative ex  |
| STM0209 | 26.25 | STY3529 |          | 3370486 | 3371556 | degS         |
| STM2919 | 12.93 | STY3445 |          | 3288627 | 3289400 | gatR         |
| STM4283 | 7.99  | STY3405 |          | 3250996 | 3252240 | probable m   |
| STM4467 | 17.09 | STY0677 |          | 676919  | 677491  | pagP         |
| STM2069 | 20.99 | STY0192 |          | 203004  | 203540  | hpt          |
| STM2767 | 19.28 | STY0762 |          | 762594  | 763364  |              |
| STM2075 | 9.51  | STY4704 |          | 4562588 | 4563565 | yjeA         |
| STM2290 | 8.53  | STY1715 |          | 1637287 | 1637976 | sseG         |
| STM2253 | 21.44 | STY1539 |          | 1493553 | 1494218 | putative me  |
| STM0609 | 7.2   |         |          |         |         |              |
| STM0807 | 30.53 | STY0843 |          | 838807  | 839514  | putative me  |
| STM0726 | 13.24 |         |          |         |         |              |
| STM4520 | 20.61 |         |          |         |         |              |
| STM4040 | 6.67  |         |          |         |         |              |
| STM4264 | 34.8  | STY0512 |          | 519213  | 519473  | rpmE2        |
| STM4154 | 25.36 | STY3104 |          | 2971865 | 2972194 | yqcC         |
| STM3088 | 44.84 |         | STY3242  | 3107037 | 3107228 | hypothetica  |
| STM1378 | 29.37 |         |          |         |         |              |
| STM2109 | 39.78 | STY4469 |          | 4355502 | 4355912 | putative me  |
| STM4014 | 34.85 |         |          |         |         |              |
| STM3610 | 33.47 | STY4472 |          | 4358279 | 4358593 | putative me  |
| STM0913 | 53.1  |         |          |         |         |              |
| STM1510 | 26.11 | STY4376 |          | 4241519 | 4241698 | rpmD         |
| STM2628 | 100   |         |          |         |         | 50S riboso   |
| STM2339 | 28.01 | STY4912 |          | 4773172 | 4773351 | hypothetica  |
| STM2995 | 42.32 | STY1496 |          | 1453776 | 1453991 | conserved    |
| STM1721 | 24.16 | STY4622 | aSTY3680 | 4489729 | 4489932 | putative ph  |
| STM0059 | 51.01 | STY0672 |          | 671038  | 671334  | citD         |
| STM0954 | 33.33 | STY0951 |          | 940884  | 941102  | infA         |

|         |       |          |         |         |       |              |
|---------|-------|----------|---------|---------|-------|--------------|
| STM1102 | 25.24 | STY4621  | 4489510 | 4489725 | nucE2 | possible se  |
| STM1901 | 12.2  | STY0162  | 166354  | 166974  | yacE  | conserved    |
| STM1284 | 20.73 | STY0303  | 315833  | 316369  |       | probable lip |
|         |       | STY0199  | 208380  | 209234  | panC  | pantoate:bi  |
| STM1399 | 18.14 | STY0422  | 432918  | 433109  | yaiA  | conserved    |
| STM4596 | 29.36 | STY0021  | 23341   | 24045   |       | conserved    |
| STM1913 | 30    | STY3332a | 3176418 | 3176567 |       | conserved    |
| STM3255 | 47.74 | STY1983  | 1872077 | 1872268 |       | putative se  |
| STM3007 | 56.91 | STY1480  | 1433112 | 1433333 |       | putative lip |
| STM4364 | 42.65 | STY0513  | 519479  | 519619  | rpmJ2 | putative 50  |
| STM1997 | 41.75 | STY1968  | 1857374 | 1857517 |       | conserved    |
| STM0131 | 29.88 | STY1495  | 1453538 | 1453681 | rpsV  | 30S riboso   |
| STM2970 | 25.16 | STY0813  | 809955  | 810104  | ybhT  | putative ex  |
| STM1353 | 9.34  |          |         |         |       |              |
| STM2787 | 33.35 |          |         |         |       |              |
| STM2275 | 20.72 |          |         |         |       |              |
| STM3730 | 8.57  |          |         |         |       |              |
| STM0120 | 4.3   |          |         |         |       |              |
| STM0706 | 6.72  |          |         |         |       |              |
| STM2857 | 8.97  |          |         |         |       |              |

|         |       |                  |         |         |      |             |
|---------|-------|------------------|---------|---------|------|-------------|
| STM2448 | 11.04 |                  |         |         |      |             |
| STM2110 | 8.41  |                  |         |         |      |             |
| STM1031 | 65.98 |                  |         |         |      |             |
| STM1033 | 40.08 |                  |         |         |      |             |
| STM2961 | 63.16 | aSTY3098         |         |         |      |             |
| STM1826 | 67.53 | aSTY3110         |         |         |      |             |
| STM2589 | 69.2  |                  |         |         |      |             |
| STM1422 | 9.59  | STY1499          | 1456097 | 1456810 |      | hypothetica |
| STM0643 | 39.76 | STY1605          | 1546055 | 1546219 |      | hypothetica |
| STM3818 | 32.15 | STY1621          | 1557049 | 1557387 |      | putative me |
| STM2586 | 30.78 | STY1639          | 1570219 | 1570836 |      | putative ba |
| STM1987 | 12.33 | STY2005          | 1885617 | 1886747 |      | conserved   |
|         |       | STY2028          | 1901062 | 1901520 |      | putative ba |
|         |       | STY1607          | 1546722 | 1547252 |      | hypothetica |
| STM1384 | 26.31 | STY1623          | 1557835 | 1558299 |      | hypothetica |
| STM1995 | 45.58 | STY1649          | 1576317 | 1577468 |      | outer mem   |
| STM1578 | 19.2  | STY2007          | 1887201 | 1887428 |      | putative DN |
|         |       | STY2030          | 1902663 | 1903211 |      | putative ba |
|         |       | STY3192          | 3057550 | 3058080 |      | hypothetica |
| STM2730 | 35.24 | STY1014          | 1010618 | 1011499 |      | putative DN |
|         |       | STY1041          | 1026186 | 1026467 |      | putative pr |
|         |       | STY1057          | 1037045 | 1037608 |      | putative ba |
| STM0685 | 13.58 | STY1073 STY2013  | 1050023 | 1050541 |      | hypothetica |
|         |       | STY3277          | 3133828 | 3133947 |      | hypothetica |
| STM3351 | 93.2  | STY3531 STY0063  | 3372342 | 3373643 | oadB | oxaloaceta  |
| STM0908 | 29.84 | aSTY1043         |         |         |      |             |
| STM0189 | 13.73 | STY1059          | 1038768 | 1039208 |      | putative ba |
| STM1512 | 21.27 | STY2034 aSTY1053 | 1904501 | 1904869 |      | putative ba |

|         |       |          |          |         |             |      |
|---------|-------|----------|----------|---------|-------------|------|
| STM2890 | 25.57 | STY3279  | 3134334  | 3134630 | hypothetica |      |
|         |       | STY2075  | 1931940  | 1932128 | conserved   |      |
| STM2746 | 26.79 | STY2353  | 2190285  | 2190764 | putative ex |      |
|         |       | STY4524  | 4414008  | 4414313 | hypothetica |      |
| STM1614 | 16.39 | STY4548  | 4432552  | 4433028 | putative me |      |
| STM1795 | 14.64 | STY4568  | 4446469  | 4447122 | possible ex |      |
| STM0941 | 18.29 | STY4585  | 4461477  | 4462019 | hypothetica |      |
| STM0350 | 22.64 | STY4602  | 4475820  | 4476350 | putative ph |      |
|         |       | STY4414  | 4280699  | 4281538 | hypothetica |      |
|         |       | aSTY4613 | aSTY3689 |         |             |      |
| STM1888 | 9.86  | STY1906  | 1799363  | 1800310 | prxA        |      |
| STM0428 | 46.92 | STY0123  | 124825   | 125532  | yabJ        |      |
| STM1132 | 21.96 | STY3519  | 3361024  | 3362514 | nanT        |      |
| STM2851 | 8.49  | STY3552  | 3395510  | 3396010 | mreD        |      |
| STM1606 | 2.98  | STY0237  | 247152   | 249824  | glnD        |      |
| STM1488 | 53.29 | STY0720  | 717672   | 718892  | nagC        |      |
| STM0476 | 64.72 |          | STY3569  | 3413104 | 3413529     | acrE |
| STM2285 | 14.32 | STY0260  | 275810   | 276199  | conserved   |      |
| STM3176 | 26.98 |          | aSTY1545 |         |             |      |
| STM2838 | 21.21 | STY2172  | 2016739  | 2017152 | yedD        |      |
| STM2578 | 6.86  | STY4085  | 3942888  | 3943820 | rfaD        |      |
| STM0591 | 17.91 | STY2229  | 2061144  | 2061937 | cbiK        |      |
|         |       | STY2171  | 2015215  | 2016699 | amyA        |      |
| STM3782 | 16.82 | STY2236  | 2065813  | 2066418 | cbiE        |      |
| PSLT054 | 61.03 | STY2205  | 2043481  | 2044749 | umuC        |      |
| STM0648 | 2.93  | STY0055  | 53852    | 56686   | ileS        |      |
| STM0918 | 29.95 | STY0095  | 94586    | 94876   |             |      |
| STM3078 | 13.23 | STY3490  | 3332126  | 3332677 |             |      |
| STM1812 | 11.69 |          |          |         |             |      |
| STM1255 | 30.8  | STY1087  | 1066679  | 1066846 | rmf         |      |
|         |       | STY1143  | 1106421  | 1107359 |             |      |
| STM0222 | 3.81  | STY1188  | 1148222  | 1150765 | mdoH        |      |
| STM0463 | 11.89 | STY1239  | 1193288  | 1193929 | tmk         |      |
| STM0393 | 44.91 | STY1260  | 1215333  | 1216241 |             |      |
| STM4051 | 39.48 | STY1168  | 1130754  | 1131446 |             |      |
| STM3370 | 20.42 | STY1226  | 1179342  | 1182545 | rne         |      |
| STM1275 | 14.92 | STY1252  | 1205600  | 1206139 |             |      |
| STM2292 | 42.53 |          |          |         |             |      |
| STM3765 | 19.84 | STY4239  | 4105054  | 4105650 | yhhF        |      |
| STM3541 | 10.38 | STY4918  | 4777978  | 4778775 | deoC        |      |
| STM3323 | 6.98  | STY1857  | 1766581  | 1767369 | aadA        |      |
|         |       | STY1827  | 1744888  | 1745772 | yeaD        |      |
| STM3690 | 8.88  |          |          |         |             |      |
| STM4101 | 17.23 | STY0002  | 337      | 2799    | thrA        |      |
| STM2238 | 12.75 |          |          |         |             |      |
| STM1179 | 19.72 | STY4902  | 4764093  | 4764551 | conserved   |      |

|         |       |         |         |         |      |               |
|---------|-------|---------|---------|---------|------|---------------|
| STM2130 | 26.3  | STY4936 | 4796535 | 4797959 | creC | putative tw   |
| STM1976 | 18.84 |         | 327721  | 328158  |      | hypothetica   |
| STM0169 | 26.72 |         |         |         |      |               |
| STM3058 | 4.75  | STY2909 | 2790727 | 2791713 |      | gab protein   |
| STM3183 | 5.62  | STY1127 | 1092736 | 1094100 | copS | histidine kir |
| STM3982 | 20.9  | STY2621 | 2455221 | 2456531 |      | putative 3-l  |
| STM2253 | 8.2   | STY2661 | 2498394 | 2499392 | yfeH | putative me   |
| STM3794 | 13.33 | STY2716 | 2548075 | 2549373 |      | putative ex   |
| STM3761 | 78.73 | STY0948 | 938216  | 938893  |      | conserved     |
| STM3504 | 9.96  | STY0981 | 976302  | 977975  | rpsA | 30S riboso    |
| STM2620 | 97    | STY1034 | 1022132 | 1022734 |      | putative ba   |
| STM2565 | 17.44 | STY0953 | 941414  | 942118  | aat  | leucyl/pher   |
| STM4058 | 6.23  | STY2811 | 2670261 | 2671646 |      | putative se   |
| STM1285 | 13.79 | STY3847 | 3704925 | 3705236 | ygjN | conserved     |
| STM2523 | 22.89 | STY3758 | 3619134 | 3619796 | talC | putative tra  |
| STM2477 | 9.92  | STY2989 | 2865343 | 2865795 |      | hypothetica   |
| STM0194 | 19.56 | STY4687 | 4549216 | 4549692 |      | FxsA prote    |
|         |       | STY2725 | 2562415 | 2563128 | purC | phosphorib    |
| STM3201 | 11.33 | STY2781 | 2639453 | 2640238 | sseB | SseB prote    |
| STM0168 | 6.08  | STY2816 | 2679294 | 2680655 |      | putative PT   |
| STM2973 | 50.26 | STY3830 | 3690386 | 3691534 |      | alcohol def   |
| STM3660 | 11.32 | STY3784 | 3649581 | 3651086 | glpK | glycerol kin  |
| STM3789 | 10.16 | STY3751 | 3609899 | 3610672 | argB | acetylgluta   |
| STM3319 | 9.34  | STY2513 | 2347856 | 2349484 | glpA | anaerobic (   |
| STM4018 | 10.93 |         |         |         |      |               |
| STM1575 | 3.48  | STY4884 | 4745128 | 4748637 | hsdR | subunit R c   |
|         |       | STY2131 | 1984165 | 1985094 | motB | motility pro  |
| PSLT042 | 15.67 | STY1788 | 1708995 | 1709531 |      | putative me   |
|         |       | STY0402 | 411771  | 413222  | prpD | PrpD prote    |
| PSLT055 | 16.1  | STY4433 | 4304371 | 4304979 | lexA | LexA repre    |
| STM3328 | 5.88  | STY2983 | 2859262 | 2860179 | sitA | Iron transp   |
| STM1212 | 16.43 | STY1677 | 1605896 | 1606363 | slyB | outer mem     |
| STM1584 | 50.44 | STY4754 | 4610391 | 4611794 | cycA | D-serine/D-   |
| STM1133 | 8.02  |         |         |         |      |               |
|         |       | STY4787 | 4645474 | 4647447 |      | putative Bg   |
| STM4104 | 3.8   | STY4761 | 4617932 | 4619875 | cpdB | 2',3'-cyclic- |
| STM2928 | 17.8  |         |         |         |      |               |
| STM2810 | 5.42  | STY4794 | 4652879 | 4654297 | treB | PTS system    |
| STM2746 | 3.58  |         |         |         |      |               |
| STM3493 | 13.6  |         |         |         |      |               |
| STM0850 | 17.98 | STY1864 | 1772234 | 1773211 |      | putative inn  |
| STM2165 | 35.91 | STY1571 | 1521003 | 1521905 |      | putative AE   |
| STM3541 | 52.11 | STY3978 | 3844293 | 3845630 | dsdX | DsdX perm     |
| STM1392 | 12.34 | STY3951 | 3819535 | 3822270 | torS | Two-compr     |
| STM1792 | 37.4  | STY0392 | 400342  | 401745  |      | probable te   |
| STM1352 | 63.5  | STY0087 | 90278   | 91564   | fixC | FixC protei   |
| STM3693 | 38.33 | STY0174 | 178463  | 179227  | pdhR | pyruvate de   |
| STM1693 | 4.44  | STY4434 | 4305158 | 4306483 | dinF | putative DN   |
| STM1487 | 12.33 | STY2560 | 2395148 | 2396086 | lrhA | NADH dehy     |
| STM0771 | 19.61 | STY1768 | 1690744 | 1691493 | btuD | vitamin B12   |
| STM0875 | 19.39 | STY0898 | 891987  | 892595  | ybjG | putative pe   |
| STM0162 | 32.73 | STY1664 | 1592799 | 1593377 |      | putative fer  |

|         |       |          |         |         |       |               |
|---------|-------|----------|---------|---------|-------|---------------|
| STM0964 | 63.48 | STY1565  | 1512843 | 1515281 | dmsA1 | putative dir  |
| STM0018 | 10.47 | STY1562  | 1511563 | 1512273 |       | conserved     |
| STM1675 | 9.33  | STY3991  | 3856485 | 3857498 |       | hypothetica   |
| STM1576 | 12.66 | STY2820  | 2683501 | 2684697 |       | putative tra  |
| STM1548 | 18.66 | STY0442  | 451765  | 452829  | queA  | S-adenosyl    |
| STM2482 | 23.84 | STY4409  | 4277287 | 4277826 |       | conserved     |
| STM2323 | 11.44 | STY2599  | 2435482 | 2436294 | truA  | tRNA pseu     |
| STM0342 | 16.03 |          | 391048  | 391575  |       | possible tra  |
| STM3666 | 9.24  | STY2772  | 2624844 | 2625770 |       | putative po   |
| STM0984 | 21.08 | STY0503  | 509626  | 511398  | mdlA  | putative AE   |
| STM1107 | 12.37 | STY0614  | 613687  | 614247  | ykgB  | putative me   |
| STM4522 | 33.96 | STY1782  | 1704154 | 1704468 |       | putative me   |
| STM3772 | 8.12  | STY4767  | 4624308 | 4624946 | msrA  | peptide me    |
| STM2719 | 16.93 | STY4815  | 4675956 | 4676438 | holC  | DNA polym     |
| STM0821 | 9.66  | STY2841  | 2703013 | 2704050 | yfiF  | putative RN   |
| STM0747 | 10.63 | STY3378  | 3217921 | 3219600 |       | putative ex   |
| STM0973 | 71.19 | STY3423  | 3263936 | 3266230 | tdcE  | probable fc   |
| STM2018 | 10.34 | STY3457  | 3297440 | 3298435 |       | putative pro  |
|         |       | STY3770  | 3635967 | 3636284 | metJ  | repressor c   |
| STM0861 | 6.2   |          |         |         |       |               |
|         |       | STY0514  | 519675  | 520145  |       | putative me   |
| STM1524 | 43.54 | STY2911  | 2793029 | 2794477 | gabD  | succinate-s   |
| STM2062 | 4.54  |          |         |         |       |               |
|         |       | STY2832  | 2694349 | 2694999 | rseA  | sigma-E fa    |
| STM4098 | 16.28 | aSTY3370 |         |         |       |               |
| STM0593 | 4.21  | STY4181  | 4039950 | 4042574 | yhjO  | putative po   |
| STM2212 | 8.46  | STY3452  | 3294919 | 3295437 |       | conserved     |
| STM1979 | 22.53 | STY1701  | 1627339 | 1627986 | yscR  | putative typ  |
| STM0004 | 11.58 | STY2740  | 2576788 | 2577825 | purM  | phosphorib    |
| STM0911 | 5.43  | STY1160  | 1122071 | 1123579 | putP  | sodium/pro    |
| STM2278 | 13.15 | STY2933  | 2807533 | 2808492 | nrdF  | ribonucleos   |
| STM3570 | 7.24  | STY0292  | 307746  | 308648  |       | hypothetica   |
| STM2882 | 1.75  | STY3005  | 2876689 | 2878746 | sipA  | pathogenic    |
| STM4058 | 13.54 | STY4295  | 4170982 | 4172334 | envZ  | two-compo     |
| STM3628 | 47.45 | STY1357  | 1318552 | 1319442 | sapC  | peptide tra   |
| STM3685 | 9.58  | STY3826  | 3686650 | 3688119 | rhaB  | rhamnuloki    |
| STM1950 | 9.5   | STY0598  | 603450  | 604172  | fimY  | fimbriae Y    |
| STM1602 | 33.81 | STY1264  | 1219329 | 1220339 | sifA  | putative vir  |
| STM1163 | 7.05  | STY1201  | 1158791 | 1159837 | pyrC  | dihydroorot   |
| STM3028 | 18.34 | STY4326  | 4208646 | 4209248 | fic   | cell filamer  |
| STM2013 | 13.65 | STY3838  | 3696497 | 3697300 | fdhD  | FdhD prote    |
| STM1910 | 60.19 | STY0691  | 686772  | 688673  | pbpA  | penicillin-bi |
| STM2912 | 28.81 | STY0277  | 293718  | 294632  | yafC  | hypothetica   |
| STM2053 | 8.01  |          |         |         |       |               |
|         |       |          |         |         |       |               |
| STM0521 | 7.08  | STY3007  | 2879857 | 2881086 | sipC  | pathogenic    |
| STM0078 | 7.33  | STY1210  | 1166894 | 1167316 | flgN  | flagella syn  |
| STM0590 | 4.66  | STY4450  | 4318337 | 4321162 | uvrA  | excision nu   |
| STM3706 | 14.81 | STY2874  | 2742393 | 2742875 | smpB  | SsrA (tmRI    |
|         |       | STY0042  | 40128   | 41621   |       | putative se   |
|         |       | STY3740  | 3591565 | 3592515 | coaA  | pantothena    |
|         |       | STY4108  | 3968743 | 3968949 |       | hypothetica   |
|         |       | STY3913  | 3773728 | 3775110 | atpD  | ATP synthe    |

|         |       |         |                    |         |         |       |              |
|---------|-------|---------|--------------------|---------|---------|-------|--------------|
| PSLT104 | 4.61  | STY0429 |                    | 437771  | 440873  | sbcC  | exonucleas   |
| STM1980 | 43.33 | STY3012 |                    | 2885385 | 2885645 | spaQ  | secretory p  |
| STM4279 | 49.79 | STY2270 |                    | 2094854 | 2095432 | phsB  | thiosulfate  |
| STM4066 | 19.02 | STY2126 |                    | 1977650 | 1978699 | cheB  | protein-glut |
| STM3589 | 26.59 | STY1342 |                    | 1302709 | 1303017 |       | conserved    |
| STM1767 | 28.16 | STY1729 |                    | 1649864 | 1650502 | ssrB  | putative tw  |
|         |       | STY4072 |                    | 3930435 | 3931559 | waaG  | lipopolysac  |
| STM4522 | 34.49 | STY0382 |                    | 391586  | 391810  |       | probable se  |
| STM0845 | 55.52 |         | STY3723            | 3572671 | 3573429 | thiF  | thiamine bi  |
| STM0851 | 7.17  | STY3574 |                    | 3424379 | 3425830 | trkH  | trk system   |
|         |       | STY2767 |                    | 2619121 | 2620395 | hisS  | histidyl-tRN |
| STM0338 | 20.27 | STY3631 |                    | 3487314 | 3487862 | rffC  | lipopolysac  |
| STM3244 | 19.12 | STY3652 |                    | 3508199 | 3509743 | ilvA  | threonine c  |
| STM1579 | 54.96 | STY1290 |                    | 1249356 | 1250066 | narJ  | respiratory  |
| STM1533 | 35.38 | STY1918 |                    | 1811072 | 1811920 | hyaF  | hydrogenas   |
| STM4517 | 14.08 | STY1316 |                    | 1275070 | 1275690 | ispZ  | putative int |
| STM0789 | 16.84 | STY0167 |                    | 171520  | 172413  | nadC  | nicotinate-r |
| STM1166 | 14.18 | STY0465 |                    | 471575  | 472366  | phnV  | probable m   |
| STM1568 | 57.4  | STY3842 |                    | 3701490 | 3702125 | fdol  | formate de   |
| STM1181 | 3.79  | STY1725 |                    | 1643582 | 1644793 | ssaD  | putative pa  |
| STM0024 | 54.76 | STY0594 |                    | 600633  | 601640  | fimH  | FimH prote   |
| STM3009 | 7.87  | STY3611 |                    | 3465703 | 3466410 | yigA  | conserved    |
| STM2465 | 6.9   | STY3648 |                    | 3504733 | 3506280 | ilvC  | ketol-acid r |
| STM2641 | 2.8   | STY0209 |                    | 218282  | 219700  | pcnB  | poly(A) pol  |
| STM0575 | 42.05 | STY1960 |                    | 1851158 | 1851958 | manY  | phosphotra   |
| STM0772 | 9.55  | STY1910 |                    | 1803420 | 1804511 |       | putative AT  |
| STM1414 | 22.45 | STY3019 |                    | 2890400 | 2892457 | invA  | possible se  |
| STM3113 | 24.66 | STY0517 |                    | 521239  | 521613  | ybaJ  | conserved    |
| STM1786 | 67.49 | STY1523 |                    | 1480110 | 1481213 | hyaA2 | uptake hyd   |
| STM0086 | 7.11  | STY1544 |                    | 1496807 | 1497994 |       | putative me  |
| STM1496 | 69.6  | STY0964 |                    | 958911  | 959774  | dmsC  | anaerobic c  |
| STM0964 | 6.8   | STY0659 |                    | 658533  | 660812  |       | molybdopte   |
| STM0366 | 7.96  |         | STY1515            | 1471213 | 1472375 |       |              |
| STM4036 | 72.17 |         |                    |         |         |       |              |
| STM1224 | 35.22 | STY1462 |                    | 1412563 | 1413513 | sifB  | putative vir |
| STM1919 | 39.27 |         |                    |         |         |       |              |
| STM3861 | 11.68 | STY1421 |                    | 1372127 | 1372537 | hslJ  | heat shock   |
| STM3459 | 9.21  | STY1354 |                    | 1316029 | 1316736 |       | conserved    |
|         |       | STY0554 |                    | 560346  | 562760  |       | putative me  |
| STM0247 | 41.59 | STY0559 |                    | 565203  | 566219  | sfbB  | ABC transp   |
| STM3472 | 38.53 | STY0584 |                    | 591675  | 592169  | ppiB  | peptidyl-pr  |
| STM2310 | 32.95 | STY0639 |                    | 640379  | 641548  | entC  | isochorism   |
| STM4040 | 9.61  | STY4615 |                    | 4486600 | 4487178 |       | putative ph  |
| STM2517 | 29.28 | STY1284 |                    | 1237990 | 1239519 |       | putative inv |
| STM1294 | 6.97  | STY1935 |                    | 1828430 | 1829974 | nhaB  | regulator o  |
| STM0580 | 5.51  |         | aSTY3668; aSTY4635 |         |         |       |              |
| STM1555 | 48.46 | STY3156 |                    | 3028619 | 3029641 |       | possible re  |
| STM0285 | 8.65  | STY4113 |                    | 3974013 | 3975404 | selA  | L-seryl-tRN  |
| STM3752 | 14.49 | STY4041 |                    | 3899797 | 3900141 |       | hypothetic   |
| STM2194 | 5.82  | STY3342 |                    | 3184202 | 3186373 |       | conserved    |
| STM1185 | 17.29 | STY3148 |                    | 3019626 | 3020321 | mutH  | DNA mism     |



|         |       |         |          |         |         |               |
|---------|-------|---------|----------|---------|---------|---------------|
| STM0666 | 12.52 | STY3308 | 3154801  | 3156213 | uxaC    | uronate iso   |
| STM1492 | 21.58 | STY2936 | 2810041  | 2811105 | proW    | glycine bet;  |
| STM3513 | 24.17 | STY2923 | 2801221  | 2801670 |         | putative me   |
| PSLT034 | 4.73  | STY3562 | 3405869  | 3407320 | panF    | sodium/par    |
| STM2595 | 66.27 |         |          |         |         |               |
| STM2551 | 6.11  | STY3211 | 3078110  | 3079240 | gcvT    | aminometh     |
| STM4064 | 24.35 |         | aSTY3242 |         |         |               |
| STM2246 | 12.8  | STY3293 | 3139940  | 3140623 |         | LysR-famil    |
| STM4264 | 21.52 | STY0511 | 517438   | 518988  | ylaB    | hypothetica   |
| STM4290 | 28.45 | STY4194 | 4059043  | 4060365 | yhjE    | hypothetica   |
| STM0796 | 24.49 |         |          |         |         |               |
| STM3676 | 47.59 | STY4743 | 4603641  | 4604495 | sgaU    | conserved     |
| STM4118 | 2.61  | STY4813 | 4671772  | 4672959 |         | putative inr  |
|         |       | STY4937 | 4798017  | 4799366 | creD    | inner meml    |
| STM3474 | 8.06  | STY2963 | 2839397  | 2840530 |         | putative rut  |
| STM1713 | 10.39 | STY2410 | 2242465  | 2243373 |         | putative tra  |
| STM2088 | 4.4   | STY2292 | 2119214  | 2120647 | rfbK    | phosphoma     |
| STM2162 | 20.86 | STY2924 | 2801705  | 2802055 | ygaC    | conserved     |
| STM3773 | 7.32  | STY2427 | 2256801  | 2257469 | folE    | GTP cyclot    |
| PSLT016 | 7.65  | STY2315 | 2143528  | 2144922 | wcaJ    | putative ex   |
| STM0862 | 12.96 | STY2406 | 2238562  | 2239260 |         | glutathione   |
| STM3112 | 39.8  | STY1927 | 1819619  | 1820230 | mltE    | membrane      |
| STM0266 | 12.36 | STY4122 | 3985635  | 3987131 | lyxK    | putative L->  |
| STM4154 | 9.49  |         |          |         |         |               |
| STM2292 | 35.4  | STY1972 | 1859271  | 1860062 | kdgR    | transcriptio  |
| STM4571 | 7.41  | STY4106 | 3966919  | 3967620 |         | putative lipi |
| STM1991 | 25.08 | STY4357 | 4232972  | 4233283 | rpsJ    | 30S ribosom   |
| STM2841 | 17.28 | STY4717 | 4579891  | 4580841 | miaA    | tRNA delta    |
| STM1826 | 71.2  | STY3422 | 3262502  | 3263866 | tdcG    | L-serine de   |
| STM3655 | 9.84  | STY3480 | 3324741  | 3325913 |         | probable G    |
| STM1919 | 27.29 | STY3395 | 3240258  | 3241778 | air     | aerotaxis re  |
| STM3188 | 8.44  | STY3310 | 3158238  | 3160094 | gsp     | glutathiony/  |
| STM4047 | 20.74 | STY3222 | 3090113  | 3090748 |         | possible m    |
| STM1179 | 15.98 | STY1217 | 1171315  | 1172070 | flgF    | putative fla  |
| STM2981 | 19.18 | STY3386 | 3229453  | 3230064 |         | putative me   |
| STM2397 | 8.64  | STY1735 | 1653541  | 1655314 | ttrS    |               |
| STM3754 | 22.82 |         |          |         |         |               |
| STM4297 | 14.32 | STY3372 | 3214506  | 3215183 | dsbB    | disulfide isc |
| STM4305 | 15.37 | STY3256 | 3118212  | 3118805 |         | conserved     |
| PSLT095 | 5.42  | STY3207 | 3071829  | 3073262 | bgIA    | 6-phospho-    |
| STM3640 | 22.34 | STY0800 | 797102   | 797488  |         | probable se   |
| STM1508 | 58.76 | STY3307 | 3153317  | 3154789 | uxuB    | D-mannoni     |
| STM2164 | 14.57 | STY3230 | 3096984  | 3097562 |         | putative me   |
| STM3250 | 20.25 | STY1139 | 1102448  | 1103251 | hpcG    | 2-oxo-hept    |
| STM1785 | 11.36 | STY0810 | 806416   | 807324  |         | putative me   |
| STM4024 | 9.2   | STY0853 | 847486   | 848481  |         | HlyD-family   |
| STM0637 | 59.43 | STY0896 | 889909   | 891111  | dacC    | D-alanyl-D-   |
| STM2560 | 26.52 | STY0510 | 516818   | 517207  | ybaZ    | putative me   |
| STM0006 | 34.58 | STY0424 | 434108   | 434392  | yaiE    | conserved     |
| STM1057 | 15.15 |         | STY3296  | 3142971 | 3143237 | hypothetica   |
| STM0398 | 40.62 |         |          |         |         |               |
| STM3173 | 44.7  |         |          |         |         |               |

|         |       |          |          |         |         |      |               |
|---------|-------|----------|----------|---------|---------|------|---------------|
| STM0204 | 49.44 | STY2787  |          | 2644800 | 2645123 | yfhF | conserved     |
| STM4275 | 22.85 | STY2191  |          | 2031707 | 2031940 | dsrB | DsrB prote    |
| STM1241 | 46.04 |          |          |         |         |      |               |
| STM2564 | 17.9  | STY2415  |          | 2246526 | 2246771 |      | putative me   |
| STM3274 | 48.9  | STY0862  |          | 854809  | 855075  | ybil | hypothetica   |
| STM1550 | 57.86 | STY4789  |          | 4647757 | 4648041 | relE | conserved     |
| STM0615 | 37.51 | STY4880  |          | 4741439 | 4741834 | yjiW | conserved     |
|         |       | STY3048  |          | 2914796 | 2915032 |      | conserved     |
| STM2541 | 41.24 | STY1754  |          | 1673765 | 1674133 |      | conserved     |
| STM0353 | 16.15 | STY1158  |          | 1117233 | 1117628 |      | putative se   |
| STM1376 | 75.81 | STY1745  |          | 1666834 | 1667070 | lppA | major oute    |
| STM2525 | 16.2  | STY4150  |          | 4010780 | 4011067 |      | conserved     |
| STM0351 | 9.03  | STY4092  |          | 3951821 | 3952252 |      | putative se   |
| STM1828 | 7     |          | STY0045  | 43198   | 44181   |      | hypothetica   |
| STM1350 | 13.78 | STY0081  |          | 82381   | 83934   | caiC | probable cr   |
| STM0032 | 62.56 | STY0046  |          | 44308   | 46023   |      | possible su   |
| STM1117 | 18.77 | STY0102  |          | 100653  | 101132  | folA | dihydrofola   |
| STM0163 | 29.9  | STY0106  |          | 103285  | 104274  | pdxA | pyridoxal p   |
| STM2983 | 49.78 | STY0091  |          | 93425   | 93655   |      | putative lipi |
| STM4410 | 31.45 |          |          |         |         |      |               |
| STM1993 | 23.9  | STY1439  |          | 1390720 | 1391064 |      | putative me   |
|         |       | STY1372  |          | 1328102 | 1328326 | pspB | phage shor    |
| STM1585 | 43.9  | STY1391  |          | 1343304 | 1343540 |      | putative lipi |
| STM3023 | 45.16 |          |          |         |         |      |               |
| STM2851 | 23.4  | STY3375  |          | 3216384 | 3216740 |      | conserved     |
| PSLT043 | 4.08  |          |          |         |         |      |               |
| PSLT028 | 32.71 |          |          |         |         |      |               |
| STM2104 | 15.3  |          |          |         |         |      |               |
| STM0557 | 16.31 |          |          |         |         |      |               |
| STM2458 | 9.89  |          |          |         |         |      |               |
| STM0769 | 5.49  |          |          |         |         |      |               |
| STM3848 | 11.39 |          |          |         |         |      |               |
| PSLT055 | 40.38 |          |          |         |         |      |               |
| STM0408 | 6.34  |          |          |         |         |      |               |
| STM3251 | 7.65  |          |          |         |         |      |               |
| STM0252 | 13.12 |          |          |         |         |      |               |
| STM1154 | 11.97 | aSTY4846 |          |         |         |      |               |
| STM1005 | 59.28 |          |          |         |         |      |               |
| STM1959 | 51.03 |          |          |         |         |      |               |
| STM2600 | 65.98 |          |          |         |         |      |               |
| STM1038 | 70.75 |          |          |         |         |      |               |
| STM1046 | 69.34 |          |          |         |         |      |               |
| STM2421 | 62.18 | STY3268  |          | 3127850 | 3129106 | nupG | nucleoside    |
|         |       | STY0311  |          | 325202  | 325672  |      | hypothetica   |
|         |       | STY0350  |          | 357726  | 358343  |      | hypothetica   |
| STM0220 | 17.48 | STY1018  |          | 1014106 | 1014420 | gam  | host-nuclea   |
|         |       | STY1045  |          | 1028101 | 1028361 |      | putative ba   |
|         |       | STY1061  |          | 1039842 | 1041830 |      | putative ba   |
| STM1338 | 9.19  | STY2036  |          | 1905864 | 1906361 |      | putative ba   |
| STM4010 | 21.32 | STY0476  |          | 482464  | 483135  |      | probable se   |
| STM2628 | 31.17 | STY1020  |          | 1014982 | 1015386 |      | putative DN   |
|         |       | STY1047  | aSTY2040 | 1029169 | 1030572 |      | putative prc  |

|         |       |          |          |         |         |      |             |
|---------|-------|----------|----------|---------|---------|------|-------------|
| STM0994 | 17.5  | STY1063  |          | 1042417 | 1042719 |      | putative ba |
|         |       | STY2039  | aSTY1048 | 1908238 | 1909740 |      | conserved   |
| STM2558 | 24.32 | STY2055  |          | 1917646 | 1917789 |      | hypothetica |
| STM2701 | 10.59 | STY1625  |          | 1558540 | 1559967 |      | bacterioph  |
| STM2435 | 48.24 | STY1672  |          | 1601223 | 1601990 | pdxY | pyridoxami  |
|         |       | STY2016  | aSTY1070 | 1892192 | 1893391 |      | putative ba |
| STM0928 | 9.26  | STY2032  |          | 1903577 | 1904131 |      | putative ba |
| STM2754 | 7.87  | STY2057  |          | 1919308 | 1920240 |      | hypothetica |
| STM2632 | 24.88 | STY2073  |          | 1927497 | 1930625 | recE | exodeoxyri  |
| STM3415 | 13.43 | STY1760  |          | 1681680 | 1682438 | aroD | 3-dehydroc  |
|         |       | STY1067  |          | 1045023 | 1045451 |      | putative ba |
|         |       | STY2043  |          | 1912209 | 1912610 |      | putative ba |
|         |       | STY2059  |          | 1920890 | 1921297 |      | putative ba |
| STM2175 | 6.65  | STY3660  |          | 3516918 | 3517487 | cl   | repressor p |
|         |       | STY3676  |          | 3529872 | 3530705 |      | putative ca |
| STM2584 | 7.28  | STY4654  |          | 4514621 | 4515415 | vexB | Vi polysacc |
|         |       | STY4671  |          | 4534634 | 4536370 |      | putative me |
| STM4315 | 5.15  | STY4824  |          | 4687302 | 4688465 |      | hypothetica |
| STM1790 | 2.61  | STY4849  |          | 4706399 | 4710148 |      | helicase re |
| STM2528 | 8.6   | aSTY4144 |          |         |         |      |             |
| STM1057 | 12.16 | STY4525  |          | 4414441 | 4415022 |      | hypothetica |

|         |       |         |         |         |         |       |             |
|---------|-------|---------|---------|---------|---------|-------|-------------|
| STM0233 | 4.3   | STY1267 |         | 1222902 | 1224131 | pepT  | aminotripe  |
| STM4456 | 10.87 | STY0146 |         | 148814  | 150130  | murD  | UDP-N-acc   |
| STM2274 | 12.68 |         |         |         |         |       |             |
| STM0067 | 11.47 | STY0200 |         | 209360  | 210154  | panB  | 3-methyl-2- |
| STM2502 | 3.12  | STY0257 |         | 271774  | 273537  |       | putative se |
| STM1728 | 78.73 | STY1548 |         | 1500132 | 1500314 |       | conserved   |
| STM0591 | 17.82 | STY0221 |         | 232071  | 234128  | fhuB  | ferrichrome |
|         |       |         | STY0705 | 701827  | 702207  |       |             |
| STM2424 | 17.53 | STY0734 |         | 734222  | 734992  | ybfF  | putative es |
| STM3698 | 46.22 |         |         |         |         |       |             |
| STM2066 | 9.74  |         |         |         |         |       |             |
| STM0501 | 5.71  | STY3899 |         | 3759977 | 3761473 | yeN   | conserved   |
| STM2309 | 38.19 |         |         |         |         |       |             |
| STM0109 | 30.64 | STY3923 |         | 3785633 | 3787390 |       | conserved   |
| STM0030 | 48.86 | STY0014 |         | 15020   | 15967   |       | putative re |
| STM3788 | 14.47 | STY2637 |         | 2472067 | 2473458 | pgtP  | phosphogly  |
| STM2589 | 10.34 | STY0808 |         | 804120  | 805166  | galT  | galactose-  |
| STM1301 | 33.24 | STY0157 |         | 162968  | 163363  | mutT  | 7,8-dihydro |
| STM2778 | 34.23 |         |         |         |         |       |             |
| STM0125 | 9.13  | STY1112 |         | 1084014 | 1084673 |       | putative me |
| STM1792 | 13.54 | STY4395 |         | 4254841 | 4255413 | yardC | conserved   |
| STM0085 | 43.09 | STY4340 |         | 4219938 | 4220489 | yheR  | putative ox |
|         |       | STY4300 |         | 4177543 | 4178253 | yrfG  | putative hy |
|         |       | STY1869 |         | 1776622 | 1777665 |       | hypothetica |
| STM1457 | 15.13 | STY4348 |         | 4226017 | 4226373 | yheM  | conserved   |

|         |       |          |         |         |      |               |
|---------|-------|----------|---------|---------|------|---------------|
| STM2404 | 14.45 | STY4309  | 4187847 | 4188368 | aroK | shikimate k   |
| STM0643 | 22.96 | STY1273  | 1230346 | 1230993 |      | conserved     |
| STM1212 | 31.52 | STY1843  | 1759179 | 1759430 |      | conserved     |
| STM2253 | 6.64  | STY2316  | 2144976 | 2146346 | manB | phosphom      |
| STM2984 | 11.12 | STY2346  | 2183793 | 2184677 |      | hypothetica   |
| STM1558 | 39.81 | STY4273  | 4139841 | 4141805 | glgX | glycogen o    |
| STM1646 | 42.93 | STY4237  | 4104402 | 4104773 |      | putative me   |
|         |       | STY2348  | 2185405 | 2187516 |      | hypothetica   |
| STM0293 | 5.47  |          |         |         |      |               |
| STM0685 | 22.9  | STY0328  | 339851  | 340156  |      | hypothetica   |
| STM1486 | 45.16 |          |         |         |      |               |
| STM2154 | 13.39 | STY2337  | 2169451 | 2170320 | alkA | DNA-3-me      |
| STM2713 | 35.43 | aSTY4618 |         |         |      |               |
| STM1981 | 5.58  |          |         |         |      |               |
| STM4062 | 8.48  | STY1085  | 1064225 | 1065865 | pqiB | putative se   |
| STM4292 | 29.52 | STY1647  | 1575105 | 1575836 | rstA | putative tw   |
| STM4383 | 49.07 | STY0917  | 908948  | 910291  |      | possible tra  |
| STM1046 | 76.33 |          |         |         |      |               |
| STM4307 | 27.96 | STY2773  | 2625707 | 2626516 |      | putative an   |
| STM2859 | 41.34 | STY2809  | 2668161 | 2669498 | yfhA | putative tra  |
| STM0910 | 67.52 |          |         |         |      |               |
| STM0844 | 32.61 | STY0968  | 963203  | 964000  | pflA | pyruvate fo   |
| STM4357 | 4.55  | STY0997  | 995531  | 997378  | ycbB | putative ex   |
| STM1499 | 16.42 | STY3810  | 3673291 | 3674187 | yiiP | putative tra  |
| STM2842 | 8.5   | STY4420  | 4288320 | 4289054 |      | putative ex   |
| STM1753 | 16.98 |          | 2903367 | 2903663 |      | hypothetica   |
| STM0735 | 20.41 | STY4702  | 4559748 | 4560482 | frdB | fumarate re   |
| STM1050 | 85.25 |          |         |         |      |               |
| STM3476 | 18.44 | STY0974  | 967949  | 968806  | focA | probable fc   |
| STM0893 | 63.21 | STY1011  | 1008747 | 1010087 | int  | integrase     |
| STM0798 | 3.09  | STY4405  | 4270729 | 4274412 | metH | B12-depen     |
| STM3067 | 61.41 |          |         |         |      |               |
| STM1928 | 22.84 | STY4449  | 4317750 | 4318250 |      | putative lipi |
| STM0143 | 10.05 | STY4805  | 4665404 | 4666624 |      | arginine de   |
| STM2820 | 13.27 | STY2564  | 2400919 | 2401596 |      | putative ph   |
| STM4174 | 28.06 | STY2591  | 2427893 | 2429320 |      | putative tra  |
|         |       | STY1248  | 1201437 | 1202261 |      | conserved     |
| STM1487 | 28.87 |          |         |         |      |               |
| STM2341 | 13.01 | STY1203  | 1160625 | 1161272 | grxB | glutaredoxi   |
| STM1692 | 5.1   | STY3726  | 3574379 | 3575512 | thiH | thiamine bi   |
| STM1368 | 40.09 | STY1791  | 1711222 | 1712613 |      | putative so   |
| STM2252 | 11.48 | STY4713  | 4574716 | 4576263 | yjeF | conserved     |
| STM3655 | 40.27 |          |         |         |      |               |
| STM3014 | 20.9  | STY2487  | 2316105 | 2316596 | napF | ferredoxin-   |
| STM3828 | 6.55  | STY2521  | 2355811 | 2357028 |      | putative MF   |
| STM0654 | 10.21 |          |         |         |      |               |
| STM1951 | 9.93  | STY2489  | 2317713 | 2319356 | yojI | putative AE   |
| STM3158 | 14.39 | STY2524  | 2359373 | 2360020 |      | conserved     |
| STM0370 | 8.93  | STY2561  | 2397018 | 2398232 |      | putative an   |
|         |       | STY2600  | 2436294 | 2437370 | usg  | putative se   |

|         |       |         |         |         |       |                               |
|---------|-------|---------|---------|---------|-------|-------------------------------|
| STM2528 | 10    | STY1800 | 1719686 | 1721044 | celB  | PTS system                    |
| STM2896 | 22.65 | STY1706 | 1631029 | 1633074 | ssaV  | putative tyrosine             |
|         |       | STY3902 | 3764066 | 3764524 | asnC  | regulatory protein            |
| STM0046 | 15.94 | STY0337 | 346165  | 346635  | safD  | putative ferritin             |
|         |       | STY0253 | 265810  | 266406  | rnhB  | ribonuclease                  |
| STM2253 | 12.06 | STY4430 | 4300332 | 4301204 | ubiA  | 4-hydroxybutyrate             |
| STM3983 | 23.99 | STY2620 | 2453074 | 2455221 |       | putative fatty acid           |
| STM1383 | 10.58 | STY0151 | 154947  | 155777  | ftsQ  | cell division protein         |
| STM1106 | 13.25 | STY1810 | 1728808 | 1729842 | astA  | arginine N-acetyltransferase  |
| STM0076 | 58.8  |         |         |         |       |                               |
| STM2985 | 50.22 | STY1749 | 1668614 | 1669030 |       | conserved                     |
| STM2221 | 19.12 | STY1491 | 1447243 | 1448730 | smvA  | methyl viologen reductase     |
| STM2160 | 16.67 | STY1703 | 1629003 | 1629377 | ssaP  | putative tyrosine             |
| STM3930 | 55.73 | STY0438 | 446857  | 448227  | proY  | proline-specific              |
| STM3823 | 54.96 | STY2481 | 2310634 | 2311236 | napC  | cytochrome c                  |
| STM3248 | 8.94  | STY2818 | 2681675 | 2682523 | yfhH  | putative transcription factor |
| STM3827 | 6.78  | STY2279 | 2105221 | 2106045 |       | conserved                     |
| STM2851 | 15.77 | STY0122 | 124019  | 124786  | yabl  | DedA family                   |
| STM3000 | 13.43 | STY0166 | 170861  | 171298  | ppdD  | prepilin peptidase            |
| STM3174 | 25.95 | STY2499 | 2331373 | 2334090 | gyrA  | DNA gyrase                    |
| STM4063 | 54.98 | STY2681 | 2515641 | 2516657 | cysP  | thiosulphate reductase        |
| STM1952 | 41.13 | STY0867 | 859258  | 859917  | glnP  | glutamine tRNA synthetase     |
| STM0837 | 57.48 | STY2218 | 2053027 | 2053956 | erfK  | putative export protein       |
| STM0591 | 34.43 | STY0636 | 636684  | 637691  | fepD  | ferric enterobactin receptor  |
| STM0914 | 72.18 |         |         |         |       |                               |
| STM1734 | 12.62 |         |         |         |       |                               |
| STM3059 | 8.75  | STY4044 | 3902226 | 3904544 |       | putative glycosyltransferase  |
| STM1692 | 50.2  | STY4168 | 4027178 | 4028785 | dppA  | periplasmic protease          |
| STM4466 | 5.46  | STY4254 | 4118018 | 4119334 | ugpB  | glycerol-3-phosphate          |
| STM3607 | 31.06 | STY0950 | 939882  | 940793  | acT   | hypothetical protein          |
| STM4100 | 11.85 | STY2764 | 2615707 | 2617179 |       | putative GTPase               |
| STM3389 | 48.7  | STY0521 | 526616  | 527269  | acrR  | potential acetyltransferase   |
| STM1429 | 39.59 | STY0562 | 568074  | 569000  |       | hypothetical protein          |
| STM2160 | 10.46 | STY4757 | 4614741 | 4615430 | ytfE  | conserved                     |
| STM1566 | 9.15  | STY4863 | 4725840 | 4726853 | trpS2 | probable tryptophan           |
| STM1062 | 37.56 | STY4928 | 4788953 | 4790620 |       | conserved                     |
| STM3928 | 20.07 | STY4139 | 4004132 | 4004485 | yiaB  | putative membrane protein     |
| STM2069 | 32.69 | STY3415 | 3257518 | 3258414 |       | possible LytR                 |
| STM1617 | 23.66 | STY4313 | 4191923 | 4192600 | rpe   | ribulose-phosphate            |
| STM3181 | 35.58 | STY3943 | 3808932 | 3811346 | gyrB  | DNA gyrase                    |
| STM0045 | 9.33  | STY2286 | 2112151 | 2112927 | hisF  | cyclase HisG                  |
| STM4261 | 6.93  | STY0451 | 459745  | 460608  | tsx   | nucleoside diphosphate        |
|         |       | STY1344 | 1304384 | 1305121 | pyrF  | orotidine-5'-phosphate        |
| STM1850 | 17.38 | STY4389 | 4249753 | 4251042 | sun   | sun protein                   |
| STM1075 | 7.8   | STY4310 | 4188425 | 4189513 | aroB  | 3-dehydroquinate              |
| STM0483 | 6.59  | STY2168 | 2012950 | 2014353 | fliD  | flagellar hook                |
| STM3302 | 10.67 | STY2827 | 2688914 | 2689594 | rnc   | ribonuclease                  |
| STM2051 | 31.02 | STY2700 | 2533611 | 2535014 | eutE  | putative alcohol              |
| STM3528 | 31.18 | STY3887 | 3743139 | 3743654 | mobB  | molybdopterin                 |
| STM4065 | 11.21 | STY3016 | 2888256 | 2888699 | spaM  | secretory protein             |
| STM2231 | 55.13 | STY1883 | 1784276 | 1784515 | msgA  | putative virulence            |
| STM0791 | 4.49  | STY3008 | 2881114 | 2882895 | sipB  | pathogenicity                 |

|         |       |         |         |              |               |           |
|---------|-------|---------|---------|--------------|---------------|-----------|
| STM3186 | 5.13  | STY0903 | 897122  | 898807       | putative me   |           |
| STM0371 | 10.13 | STY0886 | 879483  | 880424 ybiK  | putative L-α  |           |
| STM0125 | 8.07  | STY4323 | 4206350 | 4207531 yhfC | putative me   |           |
| STM1606 | 11.66 | STY2252 | 2080580 | 2081212 pduL | conserved     |           |
| STM0182 | 19    | STY4487 | 4374722 | 4375165 phnB | conserved     |           |
| STM4499 | 48.63 | STY2107 | 1958745 | 1959485 yebC | conserved     |           |
| STM1442 | 46.08 | STY3546 | 3385571 | 3386530 yhcQ | possible ex   |           |
| STM2509 | 28.47 | STY0052 | 52277   | 52540 rpsT   | 30S riboso    |           |
| STM2249 | 12.07 | STY0290 | 306444  | 306938       | conserved     |           |
|         |       | STY1426 | 1377205 | 1377654      | hypothetica   |           |
| STM0492 | 7.55  |         | STY3858 | 3713726      | 3714478 yihR  | conserved |
| STM2241 | 28.82 | STY0833 | 831540  | 833804 slrP  |               |           |
| STM0493 | 10.43 | STY2255 | 2081988 | 2082998 pduO | conserved     |           |
| STM1255 | 5.54  | STY4497 | 4387518 | 4388870 melA | alpha-galar   |           |
| STM3042 | 9.43  | STY2114 | 1964777 | 1965748      | conserved     |           |
| STM0863 | 44.25 | STY2268 | 2092797 | 2093969 yeeC |               |           |
| STM3128 | 3.26  | STY4456 | 4325000 | 4326307      | putative typ  |           |
| STM2915 | 38.26 | STY2872 | 2741487 | 2741762      | conserved     |           |
| STM3506 | 19.48 | STY0054 | 52869   | 53807 ribF   | riboflavin b  |           |
| STM4465 | 26.85 | STY4790 | 4648045 | 4648590 nrdG | anaerobic r   |           |
| STM1529 | 27.99 | STY1533 | 1487971 | 1488513      | putative ex   |           |
| STM4556 | 9.05  | STY3637 | 3493453 | 3494556 rfe  | putative un   |           |
| STM0771 | 13.49 | STY3598 | 3452617 | 3453633 pldB | lysophosph    |           |
| STM0838 | 6.6   | STY3120 | 2988303 | 2989430 ygdE | conserved     |           |
|         |       | STY3736 | 3587676 | 3588140 rplK | 50S riboso    |           |
| STM3485 | 11.35 | STY1219 | 1172921 | 1173619 flgH | flagellar L-α |           |
| STM0575 | 19.4  | STY4320 | 4202176 | 4202985 nirC | putative nit  |           |
| STM4463 | 43.8  | STY3540 | 3381626 | 3382096 argR | arginine rej  |           |
| STM2441 | 13.14 | STY3083 | 2947562 | 2948362      | conserved     |           |
| STM1509 | 20.94 | STY3778 | 3644410 | 3644940 hslV | heat shock    |           |
| STM2388 | 23.6  | STY3577 | 3428004 | 3430193 fadB | large (alph   |           |
| STM1287 | 40.4  | STY3593 | 3445786 | 3447132      | putative req  |           |
| STM0790 | 12.96 | STY3609 | 3464088 | 3464840 yigB | conserved     |           |
| STM2834 | 3.92  | STY3620 | 3472059 | 3474650 cyaA | adenylate c   |           |
| STM1390 | 42.2  | STY1855 | 1764926 | 1765774      | putative tra  |           |
| STM1214 | 1.42  | STY3731 | 3576977 | 3581200 rpoC | DNA-direct    |           |
| STM0937 | 7.44  | STY1352 | 1312786 | 1313574 fabI | enoyl-[acyl-  |           |
| STM2479 | 10.11 | STY2127 | 1978696 | 1979562 cheR | chemotaxis    |           |
| STM0703 | 10.22 | STY3103 | 2971083 | 2971865 yqcB | putative RM   |           |
|         |       | STY0919 | 910653  | 912140       | probable su   |           |
| STM3901 | 21.94 | STY0565 | 570690  | 572471 gcl   | glyoxylate c  |           |
|         |       | STY0999 | 998214  | 998861 ycbL  | conserved     |           |
| STM1762 | 56.6  | STY1486 | 1438888 | 1439583 narW | respiratory   |           |
| STM0339 | 26.17 | STY0369 | 378844  | 379602 stbE  | fimbrial cha  |           |
|         |       | STY1317 | 1275666 | 1276490 yciC | putative me   |           |
| STM1172 | 11.39 | STY1909 | 1802695 | 1803303 pth  | peptidyl-tRi  |           |
| STM3983 | 5.8   | STY1948 | 1836823 | 1838580 fadD | long-chain-   |           |
| STM1063 | 24.73 | STY1979 | 1866210 | 1867493      | putative me   |           |
|         |       | STY2083 | 1936029 | 1936685      | conserved     |           |
| STM4347 | 18.17 | STY0522 | 527388  | 530750       | integral me   |           |
| STM2529 | 31.12 | STY0660 | 660809  | 661366       | molybdopte    |           |
| STM0053 | 52.79 | STY0674 | 672791  | 674452 dpiB  | sensor kin    |           |

|         |       |          |         |         |      |               |
|---------|-------|----------|---------|---------|------|---------------|
| STM0461 | 22    | STY0985  | 980946  | 982694  | msbA | probable tr   |
| STM3474 | 13.4  | STY0648  | 650170  | 650787  |      | conserved     |
| STM0006 | 27.06 | STY1456  | 1406735 | 1407331 | tehB | tellurite res |
| STM0999 | 62.2  |          |         |         |      |               |
| STM1664 | 16.14 | STY1459  | 1409479 | 1410015 |      | putative DN   |
| STM1703 | 24.88 | STY4188  | 4049730 | 4051703 | yhjK | conserved     |
| STM3017 | 28.34 |          |         |         |      |               |
| STM3827 | 47.26 | STY4097  | 3955101 | 3956411 |      |               |
|         |       | STY2971  | 2846784 | 2848493 | hycE | formate hy    |
| STM3792 | 44.56 | STY3115  | 2982410 | 2983726 | fucP | L-fucose pr   |
| STM0984 | 15.83 | STY2877  | 2755839 | 2757995 |      | putative typ  |
|         |       | STY0452  | 460908  | 461447  | yajI | putative lip  |
| STM0747 | 4.07  | STY0492  | 497690  | 500044  | lon  | Lon protea    |
|         |       | STY4227  | 4094257 | 4094658 | nikR | nickel resp   |
| STM4447 | 5.42  |          |         |         |      |               |
|         |       | aSTY4162 |         |         |      |               |
| STM4117 | 10.66 | STY4118  | 3982461 | 3983273 |      | putative tra  |
| STM3936 | 5.51  | STY4090  | 3948736 | 3950019 |      | conserved     |
| STM1102 | 10.87 | STY0279  | 296065  | 296844  | yafD | conserved     |
| STM3686 | 4.87  | STY0443  | 453026  | 454153  | tgt  | queuine tR    |
| STM2854 | 57.4  | STY3315  | 3163369 | 3163710 | hybF | hydrogena     |
| STM2129 | 20.36 | STY2941  | 2815862 | 2817400 | emrB | multidrug r   |
| STM3239 | 37.32 | STY4173  | 4033187 | 4034485 | yhjV | putative an   |
| PSLT059 | 10.3  | STY4115  | 3977536 | 3978417 |      | putative su   |
| STM3503 | 52.8  | STY3477  | 3322453 | 3322929 | greA | transcriptio  |
| STM0141 | 19.77 | STY3392  | 3236659 | 3237426 |      | conserved     |
| STM2318 | 9.42  | STY3305  | 3150313 | 3151617 | exuT | hexuronate    |
| STM0209 | 2.95  | STY2948  | 2824270 | 2826900 | alaS | alanyl-tRN    |
| STM2191 | 14.26 | STY2424  | 2252975 | 2253973 | mglB | D-galactos    |
|         |       | STY2462  | 2293213 | 2293833 |      | putative me   |
| STM4005 | 31.83 | STY2961  | 2836255 | 2837775 | ygaA | putative sig  |
| STM1745 | 20.48 | STY2453  | 2284421 | 2285515 | yejB | putative bir  |
| STM2746 | 12.31 |          |         |         |      |               |
| STM2164 | 31.21 | STY2392  | 2222829 | 2223560 | yehW | putative pe   |
| STM4042 | 5.49  | STY0930  | 920767  | 921768  | ybjU | L-allo-threc  |
| STM2970 | 9.95  | STY4368  | 4238092 | 4238463 | rplN | 50S riboso    |
|         |       | STY2378  | 2208414 | 2209421 | stcD | putative ex   |
|         |       | STY2408  | 2239932 | 2240969 |      | putative ge   |
| STM1960 | 4.88  | STY4378  | 4242144 | 4243475 | prlA | preprotein    |
| STM2333 | 4.4   | STY4214  | 4080174 | 4081670 | pitA | putative lov  |
| STM0589 | 12.7  | STY3521  | 3363658 | 3364449 |      | putative Gr   |
| STM3391 | 5.68  | STY4885  | 4748835 | 4749749 | mrr  | mrr restrict  |
| STM1357 | 2.56  | STY4769  | 4626889 | 4630668 | ytfN | putative ex   |
| STM0192 | 22.97 | STY4907  | 4768834 | 4769271 | holD | DNA polym     |
| STM1478 | 8.62  | STY4699  | 4558327 | 4558860 | blc  | putative lip  |
| STM3069 | 14.74 | STY4798  | 4659111 | 4659497 | yjgF | conserved     |
| STM3780 | 20.61 | STY3435  | 3279763 | 3280617 | gatY | tagatose-bi   |
| STM2119 | 40.91 | STY0712  | 708474  | 709352  |      | haemolysir    |
| STM3685 | 33.57 | STY3501  | 3340797 | 3341288 | ptsN | nitrogen re   |
| STM0768 | 16.04 | STY3414  | 3257114 | 3257479 |      | putative me   |
| STM3369 | 16.23 | STY0211  | 220806  | 221261  | dksA | dosage-dej    |
| STM1170 | 9.19  | STY1717  | 1638771 | 1639250 | sscB | putative pa   |
| STM3949 | 18.62 | STY3200  | 3066947 | 3067843 | xerD | site-specifi  |

|         |       |          |         |         |         |                   |
|---------|-------|----------|---------|---------|---------|-------------------|
| STM3350 | 56.14 |          |         |         |         |                   |
| STM1637 | 10.56 | STY1722  |         | 1642206 | 1642796 | sseB putative pa  |
| STM1879 | 14.92 | STY1120  |         | 1088329 | 1088670 | sigE cell invasio |
| STM4262 | 5.57  |          | STY0768 | 766975  | 768451  |                   |
| STM1216 | 14.55 | STY0821  |         | 817657  | 818598  | hutG formiminog   |
| STM3851 | 19.19 | STY0871  |         | 862092  | 862979  | ybiF putative me  |
| STM1904 | 13.28 | STY3205  |         | 3070536 | 3071195 | putative me       |
| STM0969 | 36.35 | STY3093  |         | 2957978 | 2958334 | hypothetica       |
| STM3225 | 19.93 | STY0444  |         | 454176  | 454508  | yajC putative me  |
| STM2281 | 31.86 | STY0516  |         | 520993  | 521211  | hha haemolysir    |
| STM0745 | 18.03 | STY3332  |         | 3175691 | 3176425 | exbB biopolymer   |
| STM3007 | 53.51 | STY3123  |         | 2991074 | 2991310 | possible lip      |
| STM0629 | 63.89 | STY2204  |         | 2042823 | 2043035 | cspB cold shock   |
| STM1577 | 10.24 | STY4484  |         | 4370484 | 4372631 | fdhF formate de   |
| STM0579 | 23.67 | STY4447  |         | 4317068 | 4317424 | conserved         |
| STM0995 | 30.76 | STY4691  |         | 4553477 | 4553848 | yjel putative me  |
| STM1513 | 76.19 | STY1156  |         | 1116294 | 1116461 | conserved         |
| STM2244 | 48.56 |          |         |         |         |                   |
| STM1184 | 6.87  | STY2529  |         | 2363684 | 2365666 | putative lipi     |
| STM3817 | 99.6  | STY2478  | STY3961 | 2308551 | 2309288 | ccmC1 heme expo   |
| STM3591 | 42.89 | STY4639  |         | 4503894 | 4504127 | hypothetica       |
| STM2344 | 30.59 | STY1448  |         | 1399786 | 1400223 | putative ph       |
| STM0380 | 19.95 | STY1535  |         | 1489739 | 1490098 | conserved         |
| STM0614 | 21.07 | STY1416  |         | 1366390 | 1366824 | conserved         |
| PSLT064 | 43.32 | STY2082  |         | 1935691 | 1935921 | holE DNA polym    |
| STM4467 | 8.89  | STY0165  |         | 169466  | 170851  | hofB protein trar |
| STM2975 | 38.63 | STY3990  |         | 3855157 | 3856473 | probable pi       |
| STM1651 | 5.34  | STY3900  |         | 3761467 | 3762918 | conserved         |
| STM1207 | 28.19 | STY0456  |         | 463245  | 463715  | ribH 6,7-dimethy  |
|         |       | STY3241  |         | 3106596 | 3106727 | conserved         |
| STM3145 | 50.88 |          |         |         |         |                   |
| STM1155 | 35.56 | STY1424  |         | 1376540 | 1376731 | putative lipi     |
|         |       | STY1374  |         | 1328708 | 1328926 | pspD phage sho    |
| STM1061 | 32.78 |          |         |         |         |                   |
| STM3826 | 47.21 | STY1970  |         | 1858524 | 1858667 | putative me       |
| STM1548 | 29.39 |          |         |         |         |                   |
| STM1326 | 51.3  | STY0788  |         | 787054  | 787167  | putative me       |
| STM2249 | 17.44 |          |         |         |         |                   |
| PSLT049 | 93.88 |          |         |         |         |                   |
| STM3632 | 9.09  |          |         |         |         |                   |
| STM2427 | 24.91 |          |         |         |         |                   |
| PSLT109 | 100   |          |         |         |         |                   |
| STM2513 | 18.81 |          |         |         |         |                   |
| STM4029 | 10.12 |          |         |         |         |                   |
| STM2958 | 36.21 |          |         |         |         |                   |
| STM4399 | 5.56  |          |         |         |         |                   |
| STM2971 | 67.59 | aSTY1956 |         |         |         |                   |
| STM0750 | 34.1  | STY1042  |         | 1026467 | 1027081 | putative ba       |
| STM1032 | 48.31 |          |         |         |         |                   |
| STM1270 | 17.96 |          |         |         |         |                   |



|         |       |          |          |         |         |                      |
|---------|-------|----------|----------|---------|---------|----------------------|
| STM2960 | 63.5  | aSTY3099 |          |         |         |                      |
| STM2474 | 70.82 | aSTY3236 |          |         |         |                      |
| STM1499 | 66.69 | aSTY0962 |          |         |         |                      |
| STM2338 | 17.05 | STY1596  |          | 1540814 | 1541029 | hypothetica          |
|         |       | STY1613  |          | 1549534 | 1549845 | hypothetica          |
| STM4532 | 3.45  | STY1629  |          | 1561381 | 1563846 | putative ba          |
| STM3159 | 39.39 | STY1879  |          | 1782112 | 1782240 | hypothetica          |
|         |       | STY2020  |          | 1894800 | 1895228 | putative ba          |
| STM3028 | 17.54 | STY3086  |          | 2949638 | 2952337 | steB<br>outer mem    |
|         |       | STY1615  |          | 1550387 | 1551982 | conserved            |
|         |       | STY1631  |          | 1564727 | 1564942 | putative ba          |
| STM0141 | 25.05 | STY1887  |          | 1786270 | 1786647 | hypothetica          |
| STM0834 | 14.75 | STY2022  |          | 1896154 | 1896489 | putative ex          |
| STM0199 | 11.64 | STY3088  |          | 2953143 | 2953649 | steD<br>fimbrial sut |
| STM2257 | 21.51 | STY3287  |          | 3136966 | 3137151 | hypothetica          |
|         |       | STY1027  |          | 1019268 | 1019840 | hypothetica          |
| STM3478 | 7.85  | STY1049  | aSTY1048 | 1031929 | 1032663 | putative ba          |
|         |       | STY1065  |          | 1043789 | 1044142 | putative se          |
| STM2775 | 7.82  | STY2041  |          | 1911073 | 1911822 | putative ba          |
| PSLT075 | 12.02 | STY3289  |          | 3137880 | 3138506 | hypothetica          |
| STM3287 | 7.76  | STY3658  |          | 3515470 | 3516522 | probable bi          |
|         |       | STY1051  |          | 1033902 | 1034408 | putative ba          |
|         |       | STY2026  |          | 1898476 | 1900428 | putative ba          |
|         |       | STY3092  |          | 2956439 | 2957269 | hypothetica          |
| STM0385 | 51.78 | STY2067  |          | 1925628 | 1925783 | conserved            |
| STM4422 | 9.95  | STY2297  |          | 2125658 | 2126956 | rfbX<br>putative O-  |
| STM3356 | 11.21 | STY2364  |          | 2195375 | 2195992 | putative ex          |
| PSLT066 | 46.94 | STY4536  |          | 4422151 | 4422687 | ssB<br>single strar  |
|         |       | STY4559  |          | 4440435 | 4440986 | hypothetica          |
|         |       | STY4576  |          | 4453846 | 4454814 | hypothetica          |
| STM2523 | 8.13  | STY4593  |          | 4469696 | 4470604 | hypothetica          |
| STM1557 | 6.16  | STY4221  |          | 4085976 | 4087142 | putative an          |
|         |       | STY4539  |          | 4423868 | 4425112 | pilL<br>putative ex  |
|         |       | STY0082  |          | 83997   | 85214   | caiB<br>L-carnitine  |
| STM2838 | 51.03 | STY3494  |          | 3335488 | 3336474 | conserved            |
| STM0498 | 14.91 | STY3534  |          | 3375845 | 3376462 | ttdB<br>tartrate def |
| STM1703 | 29.2  |          | STY3568  | 3411528 | 3413138 | putative ex          |
| STM0656 | 39.94 |          |          |         |         |                      |
| STM3028 | 14.08 | STY0730  |          | 731339  | 732265  | lysR-family          |
|         |       | STY0243  |          | 254731  | 255927  | dxr<br>1-deoxy-D-    |
| STM3828 | 14.71 | STY1556  |          | 1508770 | 1509984 | rspA<br>starvation ε |
| STM1789 | 51.05 | STY1527  |          | 1483718 | 1484326 | hyaD2<br>hydrogenas  |
| STM3886 | 10.74 | STY4795  |          | 4654435 | 4655382 | treR<br>trehalose o  |
| STM2463 | 10.93 |          | STY2238  | 2067551 | 2068030 | cbiC                 |
| STM2473 | 64.72 | STY0007  |          | 7665    | 8618    | talB<br>transaldola  |
| STM0848 | 6.18  | STY1327  |          | 1284001 | 1285596 | trpD<br>anthranilate |

|         |       |         |         |         |      |               |
|---------|-------|---------|---------|---------|------|---------------|
| STM2851 | 17.69 | STY2226 | 2059701 | 2060437 | cbiM |               |
|         |       | STY1325 | 1281436 | 1282629 | trpB | tryptophan    |
| STM0142 | 15.42 |         |         |         |      |               |
| STM4532 | 3.98  | STY0111 | 109800  | 112706  | hepA | probable A    |
| STM0286 | 9.44  | STY3513 | 3356360 | 3357613 | codB | cytosine pe   |
| STM0927 | 84.37 |         |         |         |      |               |
| STM4292 | 43.02 | STY1128 | 1094093 | 1094839 | copR | response r    |
| STM3337 | 66.41 | STY1166 | 1128367 | 1129047 |      | conserved     |
| STM3944 | 15.93 | STY1205 | 1162781 | 1163365 | rimJ | ribosomal-p   |
| STM0236 | 16.35 | STY1250 | 1203322 | 1203864 |      | conserved     |
| STM0668 | 8.41  | STY1848 | 1761136 | 1761783 |      | putative me   |
| STM2401 | 58.48 | STY1192 | 1152892 | 1153812 | htrB | lipid A bios  |
| STM3976 | 39.55 | STY1241 | 1194941 | 1195738 |      | conserved     |
| STM2284 | 6.96  | STY4277 | 4147107 | 4148615 | glpD | aerobic gly   |
| STM2249 | 8     | STY4260 | 4123472 | 4125214 | ggt  | gamma-glu     |
| STM0546 | 14.59 | STY4895 | 4758838 | 4759299 | yjJA | putative se   |
| PSLT108 | 37.96 |         |         |         |      |               |
|         |       | STY4931 | 4793252 | 4793587 | yjJX |               |
| STM1226 | 18.8  | STY1841 | 1758466 | 1758813 |      | putative ba   |
| STM4011 | 6.12  | STY4899 | 4761193 | 4762140 |      | putative me   |
| STM1519 | 19.87 | STY4933 | 4794279 | 4795148 | rob  | right origin- |
| STM4301 | 2.59  | STY0298 | 312685  | 314193  |      |               |
| STM1855 | 4.65  |         |         |         |      |               |
| STM3693 | 8.53  | STY2892 | 2774411 | 2775655 | iroD | putative fer  |
| STM2112 | 8.33  |         |         |         |      |               |
| STM0373 | 8.59  |         |         |         |      |               |
| STM0972 | 11.79 |         |         |         |      |               |
| STM0585 | 18.63 | STY2894 | 2776664 | 2778844 | iroN | TonB-depe     |
| STM2272 | 21.68 |         |         |         |      |               |
| STM2289 | 59.46 | STY1140 | 1103262 | 1104053 | hpCH | 2,4-dihydro   |
| STM0994 | 7.66  | STY2646 | 2480998 | 2482650 |      | putative de   |
| STM0951 | 22.32 |         |         |         |      |               |
|         |       | STY2686 | 2519910 | 2520335 |      | putative ac   |
| STM3971 | 13.54 | STY2728 | 2565312 | 2565950 | gcvR | glycine clea  |
| STM1901 | 7.03  | STY0966 | 960124  | 961272  | ycaD | probable tr   |
| STM1378 | 8.64  | STY0995 | 990043  | 990720  | mukE | KicA protei   |
| STM0429 | 8.38  |         |         |         |      |               |
|         |       | STY3863 | 3720474 | 3721322 |      | hypothetica   |
| STM4600 | 34.82 | STY2791 | 2647697 | 2648428 |      | putative RN   |
| STM1868 | 40.43 |         |         |         |      |               |
| STM4571 | 15.14 | STY3791 | 3656029 | 3656358 |      | conserved     |
| STM1909 | 3.52  | STY3755 | 3616149 | 3617882 | yjJP | putative me   |
| STM1495 | 42.22 | STY4509 | 4400812 | 4401498 |      | conserved     |
| STM2459 | 7.8   |         |         |         |      |               |
| STM2410 | 30.8  | STY2744 | 2582300 | 2584513 |      | putative me   |
| STM4294 | 42.99 | STY2805 | 2662623 | 2663954 | cadB | probable c    |
| STM0923 | 42.62 |         |         |         |      |               |
| STM1106 | 17.07 | STY3802 | 3665690 | 3666412 |      | putative Gr   |
| STM3858 | 53.4  |         |         |         |      |               |
| STM0956 | 9.89  | STY2979 | 2854249 | 2855370 | hypD | hydrogenas    |
| STM3952 | 7.26  |         |         |         |      |               |
| STM1041 | 19.9  | STY4872 | 4733220 | 4734440 |      | putative me   |
| STM2470 | 56.14 |         |         |         |      |               |
|         |       | STY2260 | 2087422 | 2087772 |      | putative pr   |
| STM1808 | 30.84 | STY1850 | 1762192 | 1762554 |      | conserved     |
| STM1482 | 30.13 | STY1584 | 1532014 | 1532343 |      | putative me   |

|         |       |         |         |         |      |               |
|---------|-------|---------|---------|---------|------|---------------|
|         |       | STY1274 | 1231074 | 1232180 | trmU | tRNA (5-mi    |
| STM2451 | 9.55  | STY1253 | 1206213 | 1206848 |      | putative Te   |
| STM2513 | 1.75  |         | 4194856 | 4200464 | bigA |               |
| STM1197 | 5.89  | STY2149 | 1997355 | 1998788 |      | putative ex   |
| PSLT081 | 11.79 |         |         |         |      |               |
| STM2333 | 8.27  |         |         |         |      |               |
| STM3708 | 10.42 |         |         |         |      |               |
| STM4418 | 25.91 |         |         |         |      |               |
| STM1567 | 20.89 |         | 4681892 | 4683382 |      |               |
| STM2154 | 11.24 | STY2571 | 2409117 | 2409947 |      | putative tra  |
| STM3618 | 29.28 | STY2134 | 1986687 | 1987037 | flhD | flagellar tra |
| STM4232 | 5.8   | STY1769 | 1691493 | 1692044 | btuE | putative glu  |
| STM4057 | 4.03  | STY2289 | 2114739 | 2115950 | ugd  | UDP-gluco     |
| STM2334 | 6.59  | STY3942 | 3807830 | 3808903 | recF | recF protei   |
| STM0530 | 27.82 | STY2814 | 2678079 | 2678630 | yfhC | conserved     |
| STM0322 | 10.59 | STY0229 | 239070  | 239768  | mtn  | MTA/SAH i     |
| STM0639 | 24.58 | STY0147 | 150130  | 151374  | ftsW | cell divisio  |
| STM2641 | 6.59  | STY0125 | 127102  | 128085  | tbpA | thiamine-bi   |
| STM1775 | 26.24 | STY2617 | 2450682 | 2451614 |      | conserved     |
| STM0545 | 10.76 | STY1790 | 1710486 | 1711085 |      | conserved     |
| STM3314 | 31.77 | STY2186 | 2028567 | 2028944 | fliO | flagellar pr  |
|         |       | STY2376 | 2206631 | 2207428 |      | hydroxyeth    |
| STM4326 | 42.46 | STY1653 | 1581741 | 1583144 | fumC | fumarate h    |
| STM2584 | 8.71  |         |         |         |      |               |
| STM1236 | 10.13 | STY2304 | 2133107 | 2133658 | rfbC | dTDP-4-de     |
| STM3242 | 8.21  | STY3931 | 3794563 | 3795228 |      | putative hy   |
| STM2829 | 8.91  | STY0241 | 253160  | 253885  | pyrH | uridine 5'-n  |
|         |       | STY0461 | 466839  | 468701  | dxs  | 1-deoxyxyl    |
| STM1938 | 3.96  | STY0156 | 160107  | 162812  | secA | preprotein    |
| STM3883 | 20.93 | STY2550 | 2384823 | 2385377 | nuoJ | NADH deh      |
| STM0554 | 21.51 |         |         |         |      |               |
| STM2624 | 100   | STY1024 | 1017923 | 1018270 |      | putative DN   |
| STM0878 | 42.36 | STY0548 | 555710  | 556387  |      | putative AE   |
| STM2253 | 10.88 | STY0538 | 545267  | 546487  | fsr  | fosmidomy     |
| STM2515 | 15.16 | STY4701 | 4559342 | 4559737 | frdC | fumarate re   |
| STM2619 | 98.4  | STY1035 | 1022943 | 1023554 |      | hypothetica   |
| STM4200 | 7.14  | STY3364 | 3206069 | 3207544 | tolC | outer mem     |
| STM3468 | 13.68 | STY3396 | 3242298 | 3243587 |      | probable ai   |
| STM3082 | 26.37 | STY3444 | 3287473 | 3288516 | gatD | galactitol-1  |
| STM3789 | 14.85 | STY2526 | 2360664 | 2361269 | ais  | Ais protein   |
| STM3406 | 3.62  | STY2663 | 2499609 | 2501624 | ligA | DNA ligase    |
| STM3248 | 49.03 | STY0567 | 573361  | 574239  | garR | 2-hydroxy-    |
| STM0597 | 11.21 |         | 31278   | 32123   |      | putative ex   |
| STM0916 | 79.38 |         |         |         |      |               |
| STM1027 | 75.45 |         |         |         |      |               |
| STM4410 | 5.14  | STY2845 | 2708255 | 2709610 | pssA | CDP-diacyl    |
| STM3618 | 12.7  | STY3384 | 3228068 | 3228889 | bacA | bacitracin r  |
| STM0817 | 16.48 | STY4224 | 4090292 | 4093033 |      | hypothetica   |
| STM1655 | 31.74 | STY3461 | 3301996 | 3303936 |      | ATP-deper     |
| STM1694 | 14.5  | STY0458 | 464234  | 465211  |      | thiamine-m    |

|         |       |          |         |         |      |               |
|---------|-------|----------|---------|---------|------|---------------|
| STM2430 | 28.77 | STY2677  | 2511817 | 2512728 | cysM | cysteine sy   |
| STM4162 | 56.4  | STY0884  | 877295  | 878044  | moeB | molybdopte    |
| STM2207 | 15.5  | STY0285  | 301227  | 301958  | dnaQ | DNA polym     |
| STM2887 | 12.05 | STY1698  | 1625241 | 1626299 | ssaU | putative typ  |
| STM0888 | 27.41 | STY2582  | 2417938 | 2418645 | hisM | histidine tra |
| STM1112 | 19.76 | STY0013  | 13596   | 14735   | dnaJ | DnaJ prote    |
| STM2364 | 17.22 | STY1314  | 1273721 | 1274449 | tonB | TonB prote    |
| STM2465 | 24.19 | STY2692  | 2525375 | 2525869 | eutK | ethanolami    |
| STM0618 | 8.34  | STY3792  | 3656402 | 3657277 | yneB | putative alc  |
| STM2324 | 19.62 | STY0076  | 75696   | 76844   | carA | carbamoyl-    |
| STM4294 | 6.08  | STY2697  | 2530239 | 2531465 | eutH | putative me   |
| STM4203 | 10.49 | STY3750  | 3608405 | 3609781 | argH | argininosuc   |
| STM3137 | 7.2   | STY0799  | 796053  | 796991  | ybgR | probable ca   |
| STM3158 | 20.51 | STY0792  | 788911  | 789339  | tolR | tolR proteir  |
| STM2806 | 1.31  | STY2932  | 2805378 | 2807522 | nrdE | ribonucleos   |
| STM0581 | 47.37 | STY1541  | 1494880 | 1495314 | marA | multiple an   |
| STM1344 | 11.08 | STY3002  | 2875699 | 2876049 | sicP | chaperone     |
| STM1760 | 15.31 | STY1383  | 1335976 | 1336740 |      | conserved     |
| STM1560 | 13.27 | STY3558  | 3402705 | 3403304 |      | putative me   |
| STM0381 | 14.02 | STY0264  | 278283  | 278828  | yaeQ | conserved     |
| STM2785 | 37.14 | STY1271  | 1228174 | 1228848 | phoP | transcriptio  |
| STM3725 | 10.03 | STY3717  | 3566644 | 3567315 | nfi  | putative en   |
| STM3514 | 17.75 | STY2606  | 2441934 | 2442302 |      | hypothetica   |
| STM4558 | 8.01  | STY4733  | 4595156 | 4596778 | aidB | probable ar   |
|         |       | STY1727  | 1646269 | 1646652 | spiC | putative pa   |
| STM3239 | 5.73  | STY1232  | 1186982 | 1187935 | fabH | 3-oxoacyl-[   |
|         |       | STY1347  | 1306046 | 1306798 |      | putative req  |
| STM0782 | 32.19 | STY2112  | 1963601 | 1963996 |      | putative me   |
| STM2689 | 31.57 | aSTY4458 |         |         |      |               |
| STM2633 | 99.8  |          |         |         |      |               |
| STM3606 | 10.75 | STY1179  | 1140027 | 1140653 | csgD | putative req  |
| PSLT041 | 22.29 | STY0757  | 757913  | 758248  |      | putative me   |
| STM2251 | 14.13 | STY3714  | 3564849 | 3565541 | yjaH | conserved     |
| STM2317 | 3.1   | STY3581  | 3434427 | 3435950 | yigC | conserved     |
| STM0030 | 16.14 | STY3606  | 3459939 | 3460319 | yigF | putative me   |
| STM2649 | 49.71 | STY3639  | 3496464 | 3496793 | trxA | thioredoxin   |
| STM1577 | 75.44 | STY1288  | 1244084 | 1247827 | narG | respiratory   |
|         |       | STY1952  | 1842160 | 1842504 |      | conserved     |
|         |       | STY1313  | 1273201 | 1273497 |      | conserved     |
| STM4038 | 4.57  | STY3153  | 3024118 | 3026277 | aas  | 2-acylglyce   |
|         |       | STY3020  | 2892482 | 2893600 | invE | cell invasio  |
| PSLT101 | 30.99 | STY4605  | 4479212 | 4479514 |      | putative ph   |
| STM2045 | 22.96 | STY2251  | 2080098 | 2080580 | pduK | putative pro  |
| STM1765 | 68.37 | STY1489  | 1444944 | 1446332 | narU | nitrite extru |
| STM2001 | 13.23 | STY3618  | 3470870 | 3471412 |      | putative me   |
| STM1479 | 13.35 | STY3628  | 3483851 | 3484930 |      | conserved     |
| STM3235 | 55.43 | STY3656A | 3514746 | 3514844 | ilvL | ilvGMEDA      |
| STM0925 | 69.69 |          |         |         |      |               |
| STM3537 | 11.83 | STY1936  | 1830116 | 1830646 | dsbB | disulfide bc  |
| STM3264 | 28.93 | STY1335  | 1292665 | 1292916 |      | conserved     |
| STM0659 | 8.98  | STY3059  | 2922513 | 2923952 | cysN | ATP sulfur    |
| STM2314 | 12.57 | STY2086  | 1939709 | 1940368 | yebE | conserved     |

|          |       |           |         |         |      |               |
|----------|-------|-----------|---------|---------|------|---------------|
| STM4103  | 7.55  | STY0666   | 664818  | 665624  | rna  | ribonucleas   |
| STM3917  | 7.47  | STY1517   | 1472365 | 1473606 |      | putative m    |
| STM2171  | 23.3  | STY0642   | 644039  | 644794  | entA | 2,3-dihydro   |
| STM0460  | 12.39 | STY1452   | 1402777 | 1403895 |      | conserved     |
| STM3011  | 55.19 |           |         |         |      |               |
| STM3504  | 5.93  | STY1478   | 1429522 | 1431642 |      | probable T    |
| STM0725  | 7.74  | STY1449   | 1400355 | 1401161 |      | conserved     |
| STM3658  | 9.54  | STY1437   | 1388387 | 1389034 |      | putative AE   |
| STM3459  | 30.57 | STY2100   | 1953078 | 1953833 | znuC | high-affinity |
|          |       | STY0925   | 916424  | 916939  |      | probable lip  |
| STM0521  | 7.15  | STY0569   | 575648  | 577102  | ybbW |               |
| STM4445  | 5.73  | STY0571   | 577181  | 578542  | allB | putative all  |
| STM3626  | 9.42  | STY0959   | 952082  | 952696  | lolA | outer mem     |
| STM3544  | 14.84 | STY1429   | 1382423 | 1383223 |      | conserved     |
| STM1586  | 29.08 |           |         |         |      |               |
| STM0740  | 63.55 | STY1919   | 1811995 | 1813539 | appC | cytochrome    |
| STM2119  | 42.07 | STY1958   | 1848105 | 1849664 |      | putative m    |
| STM3554  | 23.6  | STY3232   | 3098252 | 3098935 |      | possible AE   |
| STM4052  | 45.93 | STY4126   | 3988909 | 3990186 | yiaN | putative m    |
| STM2136  | 6.16  |           |         |         |      |               |
| STM3205  | 8.99  | STY3980   | 3846843 | 3847928 |      | hypothetica   |
| STM3955  | 37.38 | STY3126   | 2993415 | 2994329 |      | putative m    |
| STM0747  | 8.03  | STY3221   | 3089273 | 3090019 |      | conserved     |
| STM3060  | 10.17 |           |         |         |      |               |
| STM0464  | 16.86 |           |         |         |      |               |
| STM0320  | 8.55  | STY2962   | 2837961 | 2839400 |      | putative fla  |
| STM0499  | 5.88  | STY3240   | 3104611 | 3106587 | speA | biosynthetic  |
| STM4185  | 9.07  |           |         |         |      |               |
| STM0555  | 23.95 | STY4146   | 4009535 | 4009990 |      |               |
| STM4468  | 32.72 |           |         |         |      |               |
| STM0701  | 60.85 |           |         |         |      |               |
|          |       | aSTY3270  |         |         |      |               |
| STM0209  | 13.4  | STY0497   | 503820  | 504515  | ybaX | conserved     |
| STM4037  | 20.29 | STY4213   | 4079699 | 4080034 | uspB | universal s   |
| STM2381  | 19.58 | STY3263   | 3123880 | 3124260 |      | conserved     |
| STM2769  | 36.65 |           |         |         |      |               |
|          |       | aSTY0602a |         |         |      |               |
| STM3466  | 7.7   | STY4777   | 4637904 | 4639256 | pmbA | putative Pn   |
| STM0767  | 16.69 | STY4911   | 4772444 | 4773061 | osmY | Putative pe   |
| STM2690  | 9.78  | STY2938   | 2812335 | 2813519 |      | putative tra  |
| STM2127  | 34.7  | STY2341   | 2176611 | 2179691 |      | putative RN   |
| STM0343  | 24.02 | STY2451   | 2280943 | 2282499 | rtn  | rtn protein   |
| STM0640  | 8.5   | STY2309   | 2138017 | 2139420 |      | putative ex   |
| STM0702  | 45.34 | STY2344   | 2182500 | 2183222 | baeR | putative tw   |
|          |       | STY2438   | 2269017 | 2269874 | nfo  | endonuclea    |
| STM2933  | 7.61  | STY2335   | 2165521 | 2166162 | udk  | uridine kin   |
| STM3869  | 18.26 | STY1977   | 1864800 | 1865486 | proP | ProP effect   |
| STM0985  | 29.4  | STY4101   | 3959072 | 3959545 | yibK | putative RN   |
| STM1070  | 25.95 | STY4157   | 4015808 | 4016470 | yiaD | putative ou   |
| STM2463  | 9.47  | STY2426   | 2255644 | 2256786 | yeiB | putative m    |
| STM2385  | 29.25 | STY1900   | 1794100 | 1794933 | hemK | HemK prot     |
| STM2690  | 13.93 | STY4128   | 3990801 | 3991733 |      | hypothetica   |
| STM1869A | 29.6  | aSTY1042  |         |         |      |               |
| STM2228  | 21.62 | STY4731   | 4593267 | 4593905 | yjfM | conserved     |

|         |       |         |            |         |         |      |              |
|---------|-------|---------|------------|---------|---------|------|--------------|
| STM3859 | 9.65  | STY3361 |            | 3203965 | 3204792 | icc  | conserved    |
| STM1958 | 13.59 | STY3456 |            | 3296699 | 3297223 |      | conserved    |
| STM0746 | 20.32 | STY3331 |            | 3175259 | 3175684 | exbD | biopolymer   |
| STM4102 | 61.06 | STY3223 |            | 3090949 | 3091890 |      | putative me  |
| STM3569 | 12.41 | STY3504 |            | 3342702 | 3343334 |      | conserved    |
| STM4414 | 8.45  | STY4027 |            | 3889835 | 3890691 | marT |              |
| STM2461 | 3.09  | STY3337 |            | 3179819 | 3180982 |      | probable al  |
| STM2958 | 11.54 | STY1404 |            | 1355387 | 1356181 | fnr  | fumarate a   |
| STM4456 | 29.4  | STY4023 |            | 3884528 | 3887254 | mgtB | Magnesium    |
|         |       | STY3329 |            | 3173764 | 3174138 |      | hypothetica  |
| STM0979 | 61.88 | STY3237 |            | 3102604 | 3103362 |      | conserved    |
| STM0019 | 32.74 | STY1110 |            | 1083320 | 1083601 |      | putative ac  |
| STM2180 | 5.3   | STY0818 |            | 813777  | 814772  | ybhE | conserved    |
| STM3306 | 13.43 | STY3250 |            | 3114351 | 3114767 |      | conserved    |
| STM1848 | 25.33 | STY1084 |            | 1062967 | 1064220 | pqiA | putative inr |
|         |       | STY0794 |            | 790658  | 791950  | tolB | tolB proteir |
| STM2461 | 11.94 | STY0828 |            | 825803  | 826960  | bioF | 8-amino-7-   |
| STM0840 | 67.27 | STY0881 |            | 872793  | 873602  |      | conserved    |
|         |       | STY1465 |            | 1414966 | 1415736 | pcgL | D-alanyl-D-  |
|         |       | STY0482 |            | 486404  | 486733  | cyoD | cytochrome   |
| PSLT105 | 71.1  | STY3183 |            | 3051786 | 3052013 |      | hypothetica  |
| STM3241 | 14.69 | STY3255 |            | 3117914 | 3118204 |      | conserved    |
| STM2272 | 25.23 | STY0529 |            | 535731  | 536060  | ybaB | conserved    |
|         |       | STY0630 |            | 629366  | 629584  | ybdZ | conserved    |
| STM3003 | 16.03 | STY2739 |            | 2575749 | 2576375 | upp  | uracil phos  |
| STM0913 | 69.78 |         |            |         |         |      |              |
| STM2255 | 22.8  | STY2377 |            | 2207838 | 2208152 | yohN | conserved    |
| STM0353 | 52.2  | STY0385 |            | 392809  | 393276  |      | hypothetica  |
|         |       | STY0449 |            | 458765  | 459112  | yajD | conserved    |
| STM0918 | 25.61 | STY4093 |            | 3952338 | 3952589 | grxC | glutaredoxi  |
| STM1008 | 17.56 | STY4735 |            | 4597229 | 4597558 | yjFO | putative ex  |
| STM3143 | 51.23 | STY2978 |            | 2853977 | 2854249 | hypC | hydrogenas   |
| STM1712 | 38.76 | STY1154 |            | 1115065 | 1115292 |      | conserved    |
| STM0762 | 30.71 | STY1875 |            | 1779602 | 1779943 |      | putative se  |
| STM0475 | 25.64 | STY1799 |            | 1719288 | 1719635 | celC | phosphoen    |
| STM2689 | 27.35 | STY4013 |            | 3876469 | 3876894 |      | putative PT  |
| STM4534 | 19.37 | STY4012 |            | 3873448 | 3876247 |      |              |
| STM0766 | 73.69 | STY0065 | aSTY3533   | 66650   | 66889   | oadG | oxaloaceta   |
|         |       | STY0018 |            | 17873   | 19972   |      | putative ch  |
| STM3512 | 4.62  | STY0066 |            | 67048   | 68388   | citC | citrate-sodi |
| STM2143 | 3.76  |         | STY0019; : | 20004   | 21155   |      | hypothetica  |
| STM0031 | 40.69 | STY0035 |            | 32549   | 32998   |      | putative me  |
|         |       | STY0108 |            | 105614  | 107968  | imp  | organic sol  |
| STM0231 | 34.36 | STY1183 |            | 1142881 | 1143201 |      | conserved    |
| STM0612 | 21.68 | STY1451 |            | 1402499 | 1402780 |      | putative ph  |
| STM3541 | 49.64 | STY1402 |            | 1353980 | 1354234 |      | putative me  |
| STM3693 | 29.39 | STY1461 |            | 1412059 | 1412289 |      | conserved    |
| STM2643 | 16.46 |         |            |         |         |      |              |
| STM3852 | 42.02 | STY3417 |            | 3259244 | 3259408 |      | conserved    |
| STM2113 | 17.4  |         |            |         |         |      |              |
| STM4525 | 12.81 |         |            |         |         |      |              |
| PSLT109 | 10.84 |         |            |         |         |      |              |

|         |       |          |          |         |         |              |
|---------|-------|----------|----------|---------|---------|--------------|
| PSLT021 | 22.56 |          |          |         |         |              |
| STM2241 | 11.1  |          |          |         |         |              |
| STM0670 | 10.5  |          |          |         |         |              |
| STM3189 | 13.56 |          |          |         |         |              |
| STM1763 | 17.26 |          |          |         |         |              |
| PSLT054 | 54.2  |          |          |         |         |              |
| STM2199 | 12.11 |          |          |         |         |              |
| STM2031 | 17.84 |          |          |         |         |              |
| STM0267 | 19.55 |          |          |         |         |              |
| STM2252 | 19.03 | STY4618  |          | 4488213 | 4488638 | putative re  |
| STM0585 | 50.98 | aSTY2894 |          |         |         |              |
| STM2598 | 65.7  |          |          |         |         |              |
| STM1041 | 61.16 |          |          |         |         |              |
| STM2590 | 43.19 |          |          |         |         |              |
| STM0701 | 67.35 | STY3270  |          | 3129168 | 3131292 | speC         |
| STM2238 | 15.17 | STY0327  |          | 339338  | 339781  | hypothetica  |
| STM3576 | 13.77 | STY0746  |          | 746167  | 747876  | kdpB         |
|         |       | STY1031  |          | 1020876 | 1021373 | putative ba  |
| STM0007 | 19.62 | STY1053  | aSTY2034 | 1035345 | 1035770 | putative ba  |
| STM2384 | 17.81 | STY1069  |          | 1046268 | 1046621 | putative ba  |
| STM0906 | 51.13 | STY2045  |          | 1913065 | 1913460 | putative ba  |
| STM1671 | 28.23 | STY0945  |          | 936885  | 937082  | hypothetica  |
| STM2632 | 23.81 | STY1033  |          | 1021787 | 1022092 | putative ba  |
| STM0547 | 16.43 | STY1055  |          | 1036140 | 1036694 | putative ba  |
| STM3174 | 13.59 | STY1071  | STY2015  | 1047817 | 1048497 | putative ba  |
|         |       | STY2047  |          | 1913754 | 1914323 | putative me  |
| STM1709 | 8.61  | STY2063  |          | 1923279 | 1924067 | conserved    |
|         |       | STY1633  |          | 1566081 | 1566608 | putative ba  |
| STM0968 | 5.48  | STY1890  |          | 1787529 | 1788257 | putative pe  |
|         |       | STY2024  |          | 1897520 | 1897822 | putative ba  |
| STM0158 | 11.54 | STY3090  |          | 2954131 | 2954667 | steF         |
|         |       | STY2065  |          | 1924564 | 1924860 | putative crc |
| STM1712 | 24.72 | STY2209  |          | 2046987 | 2047163 | hypothetica  |
|         |       | STY2003  |          | 1883033 | 1883224 | hypothetica  |
| STM1241 | 48.4  | aSTY1077 |          |         |         |              |
| PSLT097 | 21.5  | STY2051  |          | 1915938 | 1916228 | putative ba  |
| STM0766 | 80.3  | STY3533  | aSTY0065 | 3375447 | 3375689 | oadG         |
|         |       | STY3668  |          | 3520518 | 3522932 | possible er  |
| STM2247 | 35.08 | STY3684  |          | 3534285 | 3534713 | putative re  |
|         |       | STY4663  |          | 4525220 | 4525408 | hypothetica  |
|         |       | STY4680  |          | 4541654 | 4542913 | int          |
| PSLT104 | 3.37  | STY4832  |          | 4692212 | 4694545 | Bacterioph   |
| STM3523 | 7.65  | STY4881  |          | 4741999 | 4743387 | hsdS         |
| STM3336 | 21.83 | STY4632  |          | 4498909 | 4499127 | hypothetica  |
|         |       | STY4664  |          | 4525533 | 4527044 | putative DN  |
| STM3144 | 45.97 |          |          |         |         |              |

|         |       |          |         |         |      |               |
|---------|-------|----------|---------|---------|------|---------------|
| STM2255 | 28.35 | STY3955  | 3824187 | 3825372 | torC |               |
| STM3474 | 13.61 | STY0473  | 478989  | 479900  | apbA | ApbA          |
| STM0162 | 7.57  | STY2222  | 2056413 | 2057933 | cbiP | putative co   |
|         |       | STY0047  | 46186   | 47352   | nhaA | Na(+)/H(+)    |
| STM1354 | 48.85 | STY0085  | 88501   | 89271   | fixA | FixA protei   |
| STM0535 | 10.87 | STY3823  | 3683494 | 3684528 | rhaT | L rhamnos     |
| STM1714 | 12.48 | STY3350  | 3193456 | 3194193 | plsC | 1-acyl-glyc   |
|         |       | STY3506  | 3344134 | 3344787 |      | conserved     |
| STM0149 | 20.48 | STY3546a | 3386511 | 3386714 |      | conserved     |
| STM0475 | 72.99 | STY3570  | 3413541 | 3416655 | acrF |               |
| STM0593 | 10.83 | STY0704  | 701315  | 701788  | ybeL | conserved     |
| STM0564 | 14.44 | STY0177  | 184153  | 185580  | lpdA | dihydrolipo.  |
|         |       |          | 206167  | 206607  | yadI | putative PT   |
|         |       | STY0232  | 243080  | 244237  | yaeG | conserved     |
|         |       | STY0266  | 279279  | 279980  | cutF | copper hon    |
| STM0832 | 11.02 |          |         |         |      |               |
| STM0543 | 14.02 |          |         |         |      |               |
| STM4481 | 54.97 | STY4268  | 4132749 | 4133744 | gntR | gluconate t   |
| STM2101 | 7.33  |          |         |         |      |               |
| STM2388 | 13.72 | STY4940  | 4800549 | 4801160 | sthD | putative firr |
| STM2099 | 7.16  |          |         |         |      |               |
| STM2769 | 88.6  |          |         |         |      |               |
| STM2354 | 23.67 |          |         |         |      |               |
| STM4046 | 6.13  | STY4613  | 4485349 | 4486257 |      | probable pl   |
| STM2735 | 11.55 |          |         |         |      |               |
| STM0004 | 10.65 | STY0356  | 365369  | 366136  | yafJ | conserved     |
| STM1626 | 10.8  | STY2901  | 2784279 | 2785289 |      |               |
| STM2177 | 18.65 | STY1134  | 1098310 | 1099599 | hpaG | 4-hydroxyp    |
| STM3646 | 9.98  | STY1172  | 1135341 | 1136279 |      | putative 2-l  |
| STM0922 | 76.02 |          |         |         |      |               |
|         |       | STY1124  | 1090704 | 1090874 |      | conserved     |
| STM0669 | 43.06 | STY1162  | 1124406 | 1125260 | phoH | PhoH prote    |
| STM3980 | 11.96 | STY1195  | 1155708 | 1156280 | yceJ |               |
|         |       | STY1246  | 1200430 | 1200804 |      | putative lipi |
| STM4108 | 48.11 |          |         |         |      |               |
| STM0528 | 8.44  | STY4396  | 4255418 | 4256236 | aroE | shikimate c   |
| STM1449 | 9.06  | STY1202  | 1159941 | 1160567 | yceB | conserved     |
| STM0045 | 7.95  | STY4290  | 4164137 | 4166455 | feoB | ferrous iron  |
| STM1124 | 15.73 |          |         |         |      |               |
|         |       | STY4232  | 4098411 | 4099076 |      | putative me   |
| STM3925 | 7.64  | STY3797  | 3662183 | 3663142 | ydeW | putative req  |
| STM2596 | 63.4  |          |         |         |      |               |
| STM0557 | 22.2  |          |         |         |      |               |
| STM4235 | 8.71  | STY4442  | 4311715 | 4313130 | dnaB | replicative l |
| STM3614 | 36.31 | STY4482  | 4368150 | 4369460 | gltP | proton glut   |
| STM3095 | 20.3  | STY3054  | 2919837 | 2920316 | ygbB | 2C-methyl-    |
| STM2382 | 15.25 | STY0904  | 899078  | 899455  |      | putative me   |
| PSLT006 | 6.52  | STY2610  | 2444955 | 2447015 |      | conserved     |
| STM1030 | 49.53 |          |         |         |      |               |
| STM2589 | 66.35 |          |         |         |      |               |
| STM3965 | 1.88  | STY2778  | 2631984 | 2636918 |      | putative lipi |
| STM0368 | 11.28 | STY4402  | 4266370 | 4267674 | aceA | isocitrate ly |



|         |       |         |         |         |                    |                  |
|---------|-------|---------|---------|---------|--------------------|------------------|
| STM4526 | 9.35  |         |         |         |                    |                  |
| STM1774 | 15.17 | STY4476 | 4362770 | 4363336 | nrfB cytochrome    |                  |
| STM2867 | 25.35 | STY4515 | 4405353 | 4406228 | araC family        |                  |
| STM0478 | 18.37 | STY4707 | 4565815 | 4569141 | yjeP putative me   |                  |
| STM1155 | 58.29 | STY2639 | 2474460 | 2475380 | putative ac        |                  |
| STM3141 | 13.02 | STY2683 | 2517843 | 2518742 | conserved          |                  |
| STM3316 | 5.41  | STY2726 | 2563303 | 2564337 | nlpB putative lipi |                  |
| PSLT088 | 22.54 | STY1819 | 1738487 | 1740343 | sppA protease IV   |                  |
| STM0547 | 54.54 | STY0029 | 28429   | 29436   | bcfD fimbrial sut  |                  |
| STM3951 | 15.72 | STY4730 | 4592859 | 4593257 | yjfl putative me   |                  |
| STM0658 | 19.1  | STY4770 | 4630671 | 4631015 | ytfP conserved     |                  |
| STM3833 | 24.82 | STY2500 | 2334419 | 2335621 | putative MF        |                  |
| STM3936 | 32.11 | STY2549 | 2384524 | 2384826 | nuoK NADH dehy     |                  |
| STM3229 | 51.29 | STY2542 | 2376369 | 2376680 | conserved          |                  |
| STM3300 | 5.63  | STY2569 | 2406602 | 2408122 | putative me        |                  |
| STM2532 | 5.63  | STY2263 | 2089486 | 2090388 | pduX conserved     |                  |
| STM2057 | 39.24 | STY3424 | 3266264 | 3267472 | tdcD propionate    |                  |
| STM0176 | 36.5  |         |         |         |                    |                  |
|         |       | STY1186 | 1145268 | 1146422 | glucans bic        |                  |
| STM3904 | 12.97 |         |         |         |                    |                  |
| STM2839 | 16.59 | STY0399 | 407663  | 409288  | prpR propionate    |                  |
| STM0820 | 2.87  | STY1832 | 1751541 | 1752827 | conserved          |                  |
| STM2221 | 21.25 | STY1694 | 1619853 | 1621058 | ydhC putative int  |                  |
| STM0884 | 46.21 | STY4739 | 4600742 | 4602172 | sgaT putative tra  |                  |
| STM2921 | 54.8  | STY2586 | 2421602 | 2422171 | ubiX putative de   |                  |
| STM1358 | 8.48  | STY1773 | 1696026 | 1697090 | pheS phenylalan    |                  |
| STM1472 | 10.68 | STY1751 | 1670260 | 1671531 | conserved          |                  |
| STM0400 | 3.65  | STY4910 | 4770453 | 4772042 | prfC peptide cha   |                  |
| STM1492 | 31.2  | STY1570 | 1520264 | 1520974 | putative AE        |                  |
| STM1522 | 40.74 | STY4008 | 3870217 | 3871410 | putative inr       |                  |
| STM3554 | 40.61 | STY4426 | 4296002 | 4297111 | malK maltose/m     |                  |
| STM2189 | 22.7  | STY3896 | 3755612 | 3757117 | rbsA high affinity |                  |
| STM4454 | 15.24 | STY0275 | 286542  | 287108  | yaeD conserved     |                  |
| STM4188 | 23.03 | STY2199 | 2037487 | 2037957 | vsr patch repai    |                  |
| STM4241 | 15.84 | STY4437 | 4306924 | 4307439 | zur zinc uptake    |                  |
| STM1524 | 30.08 |         | STY1809 | 1727525 | 1728811            | astD succinylglu |
| STM2689 | 12.04 | STY1805 | 1724211 | 1724696 | putative ex        |                  |
| STM0073 | 56.92 |         |         |         |                    |                  |
| STM3365 | 48.27 | STY1680 | 1607276 | 1608145 | putative Hly       |                  |
| STM1178 | 11.72 | STY1215 | 1169358 | 1170056 | flgD flagellar ho  |                  |
| STM2098 | 11.79 | STY2305 | 2133659 | 2134537 | rfaA TDP-glucos    |                  |
| STM1216 | 16.68 | STY0364 | 373831  | 374232  | crl curlin gene    |                  |
| STM3028 | 40.01 | STY4869 | 4731292 | 4731753 | putative me        |                  |
| STM0020 | 30.81 | STY4945 | 4805344 | 4806015 | putative tra       |                  |
| STM2981 | 6.13  | STY4183 | 4044889 | 4045998 | yhjM probable ei   |                  |
| STM1453 | 26.59 | STY3453 | 3295417 | 3295860 | conserved          |                  |
| STM4600 | 8.47  | STY2536 | 2370628 | 2371590 | menC O-succinylt   |                  |
|         |       | STY2515 | 2350730 | 2351920 | glpC anaerobic g   |                  |
| STM1426 | 15.39 | STY2729 | 2565950 | 2566420 | bcp bacterioferi   |                  |
| STM1675 | 16.25 | STY0551 | 558153  | 558923  | ybbO hypotherica   |                  |
| STM0917 | 76.1  |         |         |         |                    |                  |

|         |       |         |         |         |                   |
|---------|-------|---------|---------|---------|-------------------|
| STM1029 | 70.58 |         |         |         |                   |
| STM2142 | 9.13  | STY4047 | 3908095 | 3909300 | gltS glutamate    |
| STM1693 | 37.3  | STY4169 | 4028942 | 4029961 | dppB dipeptide tr |
| STM1742 | 53.07 | STY4172 | 4031864 | 4032877 | dppF dipeptide tr |
| STM1462 | 16.82 | STY4266 | 4130526 | 4131563 | putative ox       |
| STM0919 | 60.95 |         |         |         |                   |
| STM2626 | 100   | STY1022 | 1016177 | 1017160 | conserved         |
| STM0963 | 28.12 | STY4808 | 4668995 | 4669411 | conserved         |
| STM0972 | 51.79 | STY3073 | 2935978 | 2936931 | sopD possible se  |
| STM1886 | 7.27  | STY4800 | 4660048 | 4660983 | pyrB aspartate c  |
| STM4220 | 18.1  | STY3768 | 3632107 | 3634539 | metL bifunctiona  |
| STM2253 | 9.27  | STY0747 | 747897  | 749576  | kdpA potassium-   |
| STM2126 | 14.91 | STY0753 | 754998  | 755930  | conserved         |
| STM0070 | 13.57 | STY0590 | 596706  | 597239  | fimI              |
| STM3593 | 4.84  | STY2812 | 2672341 | 2676228 | purL phosphorib   |
| STM3678 | 11.82 | STY3824 | 3684525 | 3685373 | rhaR L-rhamnos    |
| STM0646 | 11.8  |         | 691595  | 692236  | conserved         |
| STM0796 | 3.72  | STY0289 | 304545  | 306428  | hypothetica       |
| STM0234 | 69.21 | STY2806 | 2664037 | 2666181 | cadA lysine deca  |
| STM4059 | 50.77 | STY4294 | 4170266 | 4170985 | ompR two-compo    |
| STM3626 | 25.06 | STY1356 | 1317560 | 1318552 | sapD peptide tra  |
| STM4569 | 15.17 | STY0129 | 130471  | 131076  | leuD 3-isopropyl  |
| STM2463 | 12.95 | STY1302 | 1259893 | 1262571 | adh alcohol def   |
| STM0468 | 10.37 | STY3015 | 2887246 | 2888256 | spaN surface pre  |
| STM3789 | 8.26  | STY2696 | 2528839 | 2530242 | eutA putative etf |
|         |       | STY3849 | 3705694 | 3706683 | yiiD putative ac  |
| STM2164 | 16.6  | STY0684 | 680796  | 681749  | ybeF lysR-family  |
|         |       | STY3720 | 3569296 | 3569784 | rsD putative re   |
|         |       | STY3856 | 3711587 | 3712465 | yihT putative alc |
| STM0343 | 18.66 | STY3879 | 3734979 | 3735230 | hypothetica       |
|         |       | STY1542 | 1495343 | 1495558 | marB multiple an  |
| STM2221 | 25.58 | STY1230 | 1185516 | 1185689 | rpmF 50S riboso   |
| STM0371 | 18.43 | STY1381 | 1334414 | 1334920 | tpx thiol peroxi  |
|         |       | STY2742 | 2578652 | 2580718 | ppk polyphosph    |
| STM3361 | 61    | STY3543 | 3382828 | 3383094 | conserved         |
| STM1391 | 7.22  | STY4076 | 3933525 | 3934604 | waaB lipopolysac  |
| STM3494 | 30    |         | 349746  | 349859  | hypothetica       |
| STM0598 | 17.26 | STY3725 | 3573612 | 3574382 | thiG thiamine bi  |
| STM1041 | 27.58 | STY4010 | 3872958 | 3873251 | putative se       |
| STM3664 | 35.17 | STY2156 | 2003441 | 2003596 | hypothetica       |
| STM2071 | 32.5  | STY3908 | 3769916 | 3770155 | atpE ATP synthe   |
| STM4087 | 66.07 | STY2242 | 2072104 | 2072898 | pduF propanedic   |
| STM0700 | 48.06 | STY4493 | 4381279 | 4382616 | putative an       |
|         |       | STY2120 | 1971404 | 1972540 | conserved         |
| STM0111 | 4.67  | STY1339 | 1298278 | 1300953 | acnA aconitate h  |
| STM0760 | 57.63 | STY2857 | 2727355 | 2728425 | aroF phospho-2-   |
| STM2961 | 67.05 | STY3098 | 2966078 | 2967418 | ygcX probable gl  |
| STM3554 | 41.5  | STY0467 | 473232  | 474341  | phnT probable A   |
| STM1008 | 17.13 | STY3582 | 3436091 | 3436579 | rfaH transcriptio |
| STM4490 | 7.55  | STY3607 | 3460368 | 3461318 | corA magnesium    |
| STM2095 | 38.24 |         |         |         |                   |
| STM3904 | 11.55 | STY2093 | 1943261 | 1945072 | edd 6-phospho     |

|         |       |         |            |         |         |      |               |
|---------|-------|---------|------------|---------|---------|------|---------------|
| STM3951 | 33.04 | STY3642 |            | 3499842 | 3501866 | rep  | ATP-deper     |
| STM3312 | 5.77  | STY0124 |            | 125516  | 127126  | yabK | putative AE   |
|         |       | STY1303 |            | 1263048 | 1263695 |      | putative me   |
| STM1537 | 57.92 | STY1915 |            | 1809357 | 1810088 | hyaC | probable N    |
|         |       | STY3142 |            | 3014265 | 3015059 | thyA | thymidylate   |
| STM3627 | 46.79 | STY1308 |            | 1268078 | 1269085 | oppD | oligopeptid   |
| STM0168 | 16.1  | STY3833 |            | 3692583 | 3693242 |      | putative ex   |
| STM2986 | 37.67 | STY3604 |            | 3458546 | 3459430 |      | chloramph     |
|         |       | STY3650 |            | 3507263 | 3507640 |      | conserved     |
| STM2519 | 6.84  | STY1933 |            | 1825912 | 1827444 |      | conserved     |
| STM2500 | 18.12 | STY1294 |            | 1253291 | 1254133 | purU | formyltetral  |
| STM3129 | 37.89 | STY1467 |            | 1417411 | 1418856 |      | putative alc  |
| STM0481 | 2.87  | STY1976 |            | 1862732 | 1864780 | prc  | tail-specific |
| STM3482 | 8.1   | STY2098 |            | 1950720 | 1952039 | yebA | conserved     |
| STM2649 | 16.01 | STY0550 |            | 557239  | 558093  | ybbN | thioredoxin   |
|         |       | STY0575 |            | 581945  | 583180  | allC | allantoate    |
| STM0162 | 16.64 | STY0579 |            | 587512  | 588321  |      | conserved     |
| STM4251 | 22.9  | STY0621 |            | 621896  | 622264  | ybdF | conserved     |
|         |       | STY0664 |            | 664173  | 664583  | rnk  | regulator of  |
| STM3186 | 17.04 |         |            |         |         |      |               |
| STM0777 | 8.16  | STY1911 |            | 1804670 | 1805935 |      | hypothetica   |
| STM3483 | 25.33 | STY1447 |            | 1399142 | 1399774 |      | putative rib  |
|         |       | STY1444 |            | 1396641 | 1397843 |      | putative gly  |
| STM2723 | 17.13 |         | STY1415    | 1365999 | 1366337 |      | putative mu   |
| STM4416 | 12.37 | STY1382 |            | 1335036 | 1336001 |      | putative ma   |
| STM0353 | 40.97 | STY0544 |            | 551169  | 553670  | ybaR | copper-tran   |
| STM3776 | 40.97 | STY1538 |            | 1492316 | 1493506 |      | putative me   |
| STM4453 | 7.88  | STY1503 |            | 1458887 | 1460671 |      | putative hy   |
| STM3136 | 47.82 |         |            |         |         |      |               |
| STM3742 | 10.15 | STY0474 |            | 480008  | 480517  |      | conserved     |
| STM1481 | 56.26 | STY4229 |            | 4095379 | 4096428 |      | putative me   |
| STM4042 | 23.64 |         | STY3834; ; | 3693242 | 3693487 |      | hypothetica   |
| STM3169 | 24.33 | STY4123 |            | 3987138 | 3988897 | yiaO |               |
| STM0112 | 13.41 | STY4062 |            | 3922416 | 3923012 | ttk  | putative Te   |
| STM0005 | 5.09  | STY4054 |            | 3915457 | 3917138 |      |               |
| STM1576 | 6.91  | STY3117 |            | 2985634 | 2987052 | fucK | L-fuculose    |
| STM2318 | 9.49  |         | aSTY4601   |         |         |      |               |
| STM1806 | 4.32  | STY0430 |            | 440872  | 442074  | sbcD | exonucleas    |
| STM1919 | 9.61  | STY3309 |            | 3156513 | 3157568 |      | hypothetica   |
| STM0572 | 36.18 |         | STY4202    | 4069063 | 4069917 |      | putative ph   |
| STM3543 | 49.46 | STY4100 |            | 3957949 | 3959004 |      | putative lac  |
| STM1209 | 12.63 |         | STY3998    | 3864375 | 3864755 |      | hypothetica   |
| STM2513 | 4.66  | STY2875 |            | 2743495 | 2754369 |      | large repeti  |
| STM0626 | 50.47 |         | STY0061    | 61103   | 61789   | citB | transcriptio  |
|         |       | STY0462 |            | 468725  | 469624  | ispA | geranyltran   |
| STM0255 | 47.52 | STY3338 |            | 3181088 | 3181915 |      |               |
|         |       | STY2387 |            | 2218812 | 2219279 | yehS | conserved     |
|         |       | STY0934 |            | 926459  | 927358  |      | putative me   |
| STM1881 | 7.59  | STY4152 |            | 4011911 | 4012450 |      | putative ex   |
| STM1220 | 19.5  | STY4698 |            | 4557993 | 4558310 | sugE | SugE prote    |

|         |       |          |         |         |       |                |
|---------|-------|----------|---------|---------|-------|----------------|
| STM4212 | 13.89 | STY4778  | 4639354 | 4639740 | cybC  | soluble cytr   |
| STM1622 | 31.11 | STY4360  | 4234558 | 4234860 | rplW  | 50S riboso     |
| STM0995 | 17.94 | STY4714  | 4576235 | 4576696 | yjeE  | conserved      |
| STM1538 | 13.27 |          | 3308799 | 3309200 | rbfA  | ribosome-t     |
| STM2458 | 10.45 | STY3379  | 3220060 | 3221493 | rfaE  | ADP-hepto      |
| STM2284 | 6.44  | STY3297  | 3143359 | 3144660 | ordL  | putative ox    |
| STM1479 | 6.76  | STY2942  | 2817449 | 2818819 |       | putative gly   |
| STM2485 | 6.75  | STY4929  | 4790883 | 4792766 | slt   | lytic mureir   |
| STM1742 | 5.48  | STY0408  | 421872  | 423092  | sbmA  | probable A     |
| STM4530 | 10.28 |          | 2277896 | 2278882 | yeiR  | conserved      |
|         |       | STY2301  | 2130254 | 2131333 | rfbG  | CDP-gluco      |
| STM0023 | 16.14 | STY2379  | 2209437 | 2211926 | stcC  | putative ou    |
| STM0122 | 60.02 | STY1965  | 1855187 | 1856932 | ftsI2 | penicillin-bi  |
| STM2421 | 60.6  | aSTY3268 |         |         |       |                |
| STM0115 | 14.07 | STY3220  | 3088114 | 3089007 | iciA  | chromoson      |
|         |       | STY0796  | 792519  | 793307  | ybgF  | putative ex    |
| STM2643 | 44.17 | STY0855  | 849385  | 850752  | rhlE  | putative AT    |
| STM1875 | 14.98 | STY3199  | 3066210 | 3066923 | dsbC  | thiol:disulfic |
| STM1177 | 23.44 | STY1218  | 1172084 | 1172866 | flgG  | flagellar ba   |
| STM1081 | 54.97 | STY0825  | 822856  | 823332  | ybhB  | conserved      |
| STM2377 | 17.33 |          |         |         |       |                |
| STM3369 | 12.88 | STY3496  | 3337058 | 3337633 |       | possible ex    |
| STM0493 | 7.02  | STY4022  | 3883613 | 3884308 | mgtC  | conserved      |
| STM2293 | 16.38 | STY3254  | 3117351 | 3117917 |       | putative me    |
| STM0549 | 41.3  | STY2155  | 2002473 | 2003129 | sirA  | invasion re    |
| STM0670 | 1.92  | STY3510  | 3349044 | 3353504 | gltB  | glutamate s    |
| STM2205 | 15.13 | STY3436  | 3280628 | 3281542 |       | possible ca    |
| STM2924 | 18.9  | STY3390  | 3233766 | 3235748 | rpoD  | RNA polym      |
| STM2956 | 17.62 | STY1721  | 1641736 | 1642290 | sscA  | putative Ty    |
| STM0256 | 20.03 |          |         |         |       |                |
| STM1792 | 62.58 | STY0786  | 784316  | 785884  | cydA  | cytochrome     |
| STM0404 | 19.69 | STY2994  | 2868089 | 2868331 | prgl  | pathogenic     |
| STM1751 | 57.6  | STY2920  | 2800121 | 2800522 | stpA  | DNA-bindir     |
| STM3825 | 21.89 | STY4067  | 3926092 | 3926259 | rpmG  | 50S riboso     |
| STM1559 | 20.88 | STY2863  | 2732520 | 2732768 | rpsP  | 30S riboso     |
|         |       | STY0587  | 594450  | 594662  | ybcJ  | conserved      |
| STM1103 | 13.34 | STY1345  | 1305121 | 1305447 |       | putative tra   |
| STM2502 | 45.06 |          |         |         |       |                |
| STM3075 | 19.67 | STY2174  | 2018610 | 2018843 | yedF  | conserved      |
|         |       | STY1473  | 1426016 | 1426249 |       | conserved      |
| STM1167 | 23.79 |          | 3469681 | 3470034 |       | putative me    |
| STM0092 | 18.02 | STY3647  | 3504360 | 3504641 | ppiC  | peptidyl-prc   |
| STM4170 | 49.86 | STY0982  | 978131  | 978415  | himD  | integration    |
| STM3201 | 22.76 |          |         |         |       |                |
| STM4386 | 57.86 | STY4121  | 3984976 | 3985638 | viaQ  | putative he    |
| STM1337 | 11.05 |          |         |         |       |                |
| STM0078 | 65.34 |          |         |         |       |                |
| STM4514 | 25.8  |          |         |         |       |                |
|         |       | aSTY3614 |         |         |       |                |
| STM4335 | 38.11 | STY4696  | 4556973 | 4557119 | ecnB  | entericidin    |
| STM4413 | 46.84 | STY4948  | 4807787 | 4807927 |       | conserved      |
| STM4234 | 60.61 | STY0001  | 190     | 255     | thrL  | thr operon     |

|         |       |          |         |         |                   |
|---------|-------|----------|---------|---------|-------------------|
| STM4463 | 21.99 |          |         |         |                   |
| STM3622 | 68.9  |          |         |         |                   |
| STM0487 | 36.72 |          |         |         |                   |
| STM3807 | 19.91 | STY3376  | 3216815 | 3217018 | glgS glycogen s   |
| STM2116 | 26.55 | STY3471  | 3316375 | 3316770 | secG protein-exp  |
| STM3832 | 17.46 | STY0906  | 899920  | 900210  | ybjC putative me  |
| STM1163 | 20.44 |          |         |         |                   |
| STM1006 | 45.67 |          |         |         |                   |
| STM2530 | 5.98  | STY0759  | 759249  | 760343  | UDP-galac         |
| STM0468 | 19.15 |          |         |         |                   |
| STM2759 | 20.58 |          |         |         |                   |
| STM1668 | 15.29 |          |         |         |                   |
| STM4028 | 13.96 |          |         |         |                   |
| STM4295 | 26.22 |          |         |         |                   |
| STM2119 | 22.02 | aSTY1958 |         |         |                   |
| STM0747 | 6.6   |          |         |         |                   |
| STM0038 | 61.24 | STY0039  | 35339   | 37057   | possible su       |
| STM0326 | 16.39 | aSTY2248 |         |         |                   |
| STM0667 | 41.18 | aSTY2332 |         |         |                   |
| STM0377 | 33.49 | aSTY2446 |         |         |                   |
| STM1496 | 67.34 | aSTY0964 |         |         |                   |
| STM3835 | 26.86 | aSTY3359 |         |         |                   |
| STM2971 | 64.27 | aSTY3422 |         |         |                   |
| STM2479 | 64.82 | aSTY3511 |         |         |                   |
| STM2594 | 90.05 |          |         |         |                   |
|         |       | STY3189  | 3055153 | 3055644 | hypothetica       |
| STM3757 | 10.44 | STY2069  | 1925965 | 1926261 | hypothetica       |
| STM2208 | 9.36  | STY2299  | 2128040 | 2128879 | rfbS paratose sy  |
| STM2247 | 36.62 | STY3686  | 3535233 | 3535679 | putative ph       |
| STM0113 | 19.4  | STY3064  | 2926652 | 2926945 | ygbF conserved    |
| PSLT018 | 12.22 | STY0207  | 216827  | 217411  | staA putative fir |
| STM1922 | 4.07  | STY3345  | 3189433 | 3190416 | hypothetica       |
|         |       | STY3664  | 3518798 | 3519139 | conserved         |
| STM1201 | 40.26 | STY3680  | 3532994 | 3533197 | probable pl       |
|         |       | STY2887  | 2766359 | 2766874 | probable m        |
|         |       | STY0201  | 210264  | 211439  | staG putative fir |
|         |       | STY0314  | 326689  | 327150  | probable se       |
| STM0006 | 35.99 | STY3666  | 3519440 | 3519667 | hypothetica       |
| STM2468 | 23.62 | STY3682  | 3533436 | 3533909 | nucD putative lys |
| STM1957 | 91.58 | STY3706  | 3550557 | 3550970 | tnpA transposas   |
| STM1631 | 10.5  | STY4075  | 3932797 | 3933465 | hypothetica       |
| STM3381 | 30.75 | STY1593  | 1539702 | 1539917 | hypothetica       |
|         |       | STY1610  | 1548347 | 1548577 | hypothetica       |
| STM2517 | 23.9  | STY2750  | 2587425 | 2587583 | hypothetica       |
| STM0827 | 10.02 | STY2906  | 2787653 | 2788462 | putative ex       |
| STM3501 | 18.84 | aSTY4108 |         |         |                   |
| STM2289 | 47.48 | aSTY4638 |         |         |                   |
|         |       | STY4668  | 4530511 | 4530999 | conserved         |
| STM2763 | 9.82  | STY4821  | 4683853 | 4685118 | integrase         |
| STM3789 | 5.13  | STY4549  | 4433025 | 4433687 | pilU prepilin per |

|         |       |         |         |         |             |
|---------|-------|---------|---------|---------|-------------|
| STM2297 | 10.64 | STY4569 | 4447122 | 4448021 | hypothetica |
| STM2204 | 2.64  | STY4850 | 4710186 | 4712723 | DEAD-box    |
| STM1703 | 17.11 | STY4619 | 4488638 | 4489015 | putative me |
| STM3330 | 12.11 | STY4648 | 4508347 | 4508634 | hypothetica |
|         |       | STY4665 | 4527028 | 4528617 | hypothetica |

|         |       |         |         |         |         |      |              |
|---------|-------|---------|---------|---------|---------|------|--------------|
| STM2130 | 12.91 |         | STY0744 | 742869  | 745577  | kdpD | sensor pro   |
| STM2273 | 25.13 | STY3945 |         | 3812376 | 3813569 |      | possible ra  |
| STM0573 | 13.83 | STY3927 |         | 3791019 | 3791978 | pstC | phosphate    |
| STM4507 | 13.6  | STY3888 |         | 3749553 | 3750257 |      | hypothetica  |
| PSLT017 | 11.65 | STY1904 |         | 1797626 | 1798249 | hemM | outer mem    |
| STM0329 | 58.14 | STY0130 |         | 131087  | 132487  | leuC | 3-isopropyl  |
| STM0722 | 3.63  | STY0050 |         | 50447   | 51820   |      | putative tra |
| STM0351 | 19.56 | STY0139 |         | 141361  | 141819  | yabB | conserved    |
| STM0568 | 61.64 | STY0173 |         | 176527  | 177897  | aroP | aromatic ai  |
| STM0027 | 47.5  |         |         |         |         |      |              |
| STM1327 | 10.82 |         |         |         |         |      |              |

|         |       |         |  |         |         |      |              |
|---------|-------|---------|--|---------|---------|------|--------------|
|         |       | STY0263 |  | 277885  | 278103  | yaeP | conserved    |
| STM2298 | 7.58  | STY3526 |  | 3367154 | 3368278 |      | putative AT  |
| STM2784 | 29.5  | STY3561 |  | 3405637 | 3405879 |      | conserved    |
| STM3215 | 7.45  | STY0698 |  | 693269  | 693859  | rlpB | rare lipoprc |
| STM3057 | 49.87 | STY0717 |  | 712799  | 713974  | yleB | putative mc  |
| STM4294 | 48.81 | STY0738 |  | 738049  | 739368  | potE | putrescine-  |
| STM4303 | 24.2  | STY2170 |  | 2014775 | 2015143 | fliT | flagellar pr |
|         |       | STY1831 |  | 1749484 | 1751418 |      | conserved    |

|         |       |         |         |         |         |      |             |
|---------|-------|---------|---------|---------|---------|------|-------------|
|         |       |         | STY2328 | 2156001 | 2156777 | wcaA |             |
| STM2305 | 18.76 | STY4623 |         | 4489932 | 4490396 |      | putative ca |
| STM2832 | 47.94 |         |         |         |         |      |             |
| STM2766 | 13.33 |         |         |         |         |      |             |
| STM0793 | 20.37 | STY2912 |         | 2794492 | 2795775 | gabT | 4-aminobui  |
| STM1146 | 31.03 | STY4946 |         | 4806214 | 4806780 |      | putative se |

|         |       |         |  |         |         |      |             |
|---------|-------|---------|--|---------|---------|------|-------------|
| STM0340 | 17.24 |         |  |         |         |      |             |
| STM2006 | 32.29 |         |  |         |         |      |             |
| STM3515 | 3.36  | STY1078 |  | 1053181 | 1055793 | pepN | aminopepti  |
| STM4308 | 41.02 | STY1569 |  | 1519345 | 1519959 |      | conserved   |
|         |       | STY4346 |  | 4224909 | 4225631 | yheO | conserved   |
| STM4208 | 5.58  | STY1081 |  | 1057716 | 1058825 |      | conserved   |
| STM3190 | 9.55  | STY1666 |  | 1595392 | 1596450 |      | putative me |
| STM0386 | 14.84 | STY4377 |  | 4241702 | 4242136 | rplO | 50S riboso  |
| STM1073 | 13.12 | STY4329 |  | 4211189 | 4213276 | yhfK |             |
| STM3134 | 2.22  | STY4296 |  | 4172409 | 4174028 | pckA | phosphoen   |
|         |       | STY1856 |  | 1765843 | 1766436 |      | putative re |

|         |       |         |            |         |         |      |             |
|---------|-------|---------|------------|---------|---------|------|-------------|
| STM3109 | 2.67  |         | STY1164; ; | 1126533 | 1127390 |      | putative me |
| STM2212 | 8.59  | STY1238 |            | 1192282 | 1193298 |      | putative se |
| STM3570 | 50.88 | STY1258 |            | 1213359 | 1214060 |      | ABC transp  |
| STM4485 | 47.64 | STY4269 |            | 4133883 | 4134416 | gntK | putative gl |
| STM0908 | 74.2  |         |            |         |         |      |             |

|         |       |         |          |         |               |
|---------|-------|---------|----------|---------|---------------|
| STM0597 | 8.29  |         |          |         |               |
| STM0730 | 26.58 | STY3814 | 3677105  | 3677500 | hypothetica   |
| STM1965 | 5.81  | STY3780 | 3646348  | 3647277 | menaquino     |
|         |       | STY3745 | 3603465  | 3604565 | trmA          |
| STM1853 | 37.54 | STY3030 | 2899240  | 2899896 | possible se   |
| STM4154 | 7.81  | STY4697 | 4557150  | 4557737 | ecnR          |
| STM4445 | 6.3   | STY2623 | 2457358  | 2458671 | fadL          |
| STM1951 | 50.51 | STY0924 | 915467   | 916195  | artP          |
| STM2466 | 8.3   | STY2709 | 2540186  | 2542465 | maeB          |
| STM0793 | 7.63  | STY2735 | 2571687  | 2573150 |               |
| STM0966 | 18.61 | STY2797 | 2653445  | 2654373 |               |
| STM0149 | 51.8  |         | 3668495  | 3668752 |               |
| STM3981 | 20.45 | STY3771 | 3636785  | 3638529 |               |
| STM2903 | 30.42 |         |          |         |               |
|         |       | STY3051 | 2917429  | 2918055 | pcm           |
|         |       | STY3082 | 2945697  | 2947334 | pyrG          |
|         |       |         |          |         | L-isoaspart   |
|         |       |         |          |         | CTP synthe    |
| STM1033 | 45.65 |         |          |         |               |
| STM4432 | 5.79  |         |          |         |               |
| STM0007 | 6.87  | STY1803 | 1722307  | 1723134 | nadE          |
| STM0386 | 13.24 | STY1685 | 1612050  | 1612649 |               |
| STM0086 | 27.05 | STY2192 | 2032030  | 2032257 | yodD          |
| STM1355 | 9.93  |         |          |         |               |
| STM3645 | 10.82 | STY2514 | 2349474  | 2350733 | glpB          |
| STM1899 | 49.89 | STY4855 | 4717972  | 4718697 |               |
|         |       |         |          |         | anaerobic (   |
|         |       |         |          |         | conserved     |
| STM3766 | 40.1  |         | aSTY4875 |         |               |
| STM3744 | 8.64  | STY1173 | 1136364  | 1137101 |               |
| STM1674 | 17.65 | STY1818 | 1737762  | 1738313 |               |
| STM1901 | 15.04 | STY1676 | 1604502  | 1605623 |               |
| STM3502 | 7.85  | STY1652 | 1580815  | 1581744 | tus           |
|         |       | STY1646 | 1574643  | 1574978 |               |
| STM0382 | 59.88 | STY1191 | 1151523  | 1152737 | yceE          |
| STM2863 | 50.18 | STY2986 | 2861845  | 2862693 | sitD          |
| STM3270 | 18.65 | STY1669 | 1597769  | 1598404 | nth           |
| STM2494 | 11.02 | STY2198 | 2036578  | 2037498 | yedA          |
| STM0190 | 8.97  | STY2283 | 2109775  | 2110842 | hisB          |
| STM1714 | 4.92  | STY1816 | 1734647  | 1736596 | topB          |
| STM3936 | 16.23 | STY1678 | 1606411  | 1606845 | slyA          |
| STM2511 | 17.38 | STY1689 | 1615107  | 1615454 | ydhD          |
| STM0427 | 8.95  | STY1656 | 1586436  | 1587944 |               |
| STM1972 | 43.67 | STY1705 | 1629738  | 1631039 | ssaN          |
| STM0124 | 20.88 | STY3903 | 3764614  | 3765057 | mioC          |
| STM1614 | 45.2  | STY4000 | 3865208  | 3866566 |               |
| STM1073 | 14.58 | STY2824 | 2686529  | 2687260 | pdxJ          |
| STM0703 | 22.9  | STY0433 | 443048   | 444343  | phoR          |
| STM2074 | 3.98  | STY4401 | 4264737  | 4266338 | aceB          |
| STM3399 | 18.52 | STY0079 | 80834    | 81430   | caiE          |
| STM2820 | 15.59 | STY1789 | 1709680  | 1710348 |               |
| STM2403 | 7.56  | STY1781 | 1703302  | 1704157 |               |
| STM3294 | 12.22 | STY2189 | 2029969  | 2030763 | fliR          |
| STM3545 | 16.77 | STY1660 | 1589725  | 1590840 |               |
|         |       |         |          |         | flagellar bic |
|         |       |         |          |         | putative ox   |

|         |       |         |         |         |               |
|---------|-------|---------|---------|---------|---------------|
| STM1651 | 15.09 | STY1575 | 1525091 | 1525786 | putative de   |
| STM0508 | 11.74 | STY2602 | 2438615 | 2439616 | div           |
| STM3279 | 6.85  | STY2819 | 2682562 | 2683479 | putative ox   |
| STM2410 | 8.92  |         |         |         |               |
| STM2370 | 24.78 | STY3358 | 3201025 | 3201339 | conserved     |
| STM1218 | 53.19 | STY4241 | 4107254 | 4107922 | ftsE          |
| STM1114 | 13.46 | STY4314 | 4192593 | 4193351 | gph           |
| STM0833 | 39.69 | STY0380 | 390264  | 390788  | possible ou   |
| STM3547 | 44.54 | STY1739 | 1660631 | 1661849 |               |
|         |       | STY0509 | 516216  | 516785  | conserved     |
| STM4206 | 67.5  | STY0607 | 609316  | 609678  | gtrA          |
| STM2898 | 15.91 | STY4773 | 4633847 | 4634377 | ppa           |
| STM0600 | 39.51 | STY4890 | 4751918 | 4754068 | cstA          |
| STM1723 | 11.64 | STY3367 | 3209659 | 3210489 | probable ca   |
| STM2810 | 5.82  | STY3397 | 3243758 | 3245775 | conserved     |
|         |       | STY3401 | 3247078 | 3247575 | conserved     |
| STM1221 | 17.02 | STY4305 | 4184842 | 4185381 | yrfC          |
| STM2466 | 12.34 | STY2568 | 2404240 | 2406384 | pta           |
|         |       | STY2800 | 2655185 | 2656462 | csiE          |
|         |       | STY0577 | 584567  | 586231  | fdrA          |
| STM3081 | 49.46 | STY0576 | 583202  | 584251  | allD          |
| STM3835 | 3.34  | STY3033 | 2900744 | 2903311 | mutS          |
|         |       | STY3811 | 3674335 | 3674835 | cpxP          |
| STM0829 | 21.38 | STY0708 | 704016  | 704690  | gltK          |
| STM2427 | 14.23 | STY4391 | 4252057 | 4252566 | fms           |
| STM0931 | 8.14  | STY2828 | 2689868 | 2690842 | lepB          |
| STM0837 | 8.17  | STY2287 | 2112921 | 2113532 | hisI          |
| STM3445 | 21.46 | STY3871 | 3726120 | 3727943 | typA          |
| STM1225 | 40.34 | STY0912 | 905141  | 906094  | potH          |
| STM3411 | 15.7  | STY4387 | 4247800 | 4248213 | mscL          |
| STM2702 | 58.68 |         |         |         |               |
| STM2299 | 14.22 | STY1223 | 1177419 | 1178372 | figL          |
| STM3843 | 18.5  | STY2826 | 2688012 | 2688917 | era           |
| STM4283 | 36.9  | STY4189 | 4051861 | 4053147 | dctA          |
| STM1815 | 8.97  | STY2802 | 2657781 | 2659034 | glyA          |
| STM1597 | 4.29  | STY1159 | 1117687 | 1121649 | putA          |
|         |       | STY1655 | 1585158 | 1586333 | manA          |
| STM0842 | 56.07 | STY0900 | 894194  | 895009  | conserved     |
| STM2803 | 9.88  | STY0877 | 867253  | 868365  | ybiR          |
| STM0637 | 29.65 | STY1993 | 1877393 | 1877659 | hypothetica   |
| STM4114 | 30.41 | STY2403 | 2236039 | 2236236 | hypothetica   |
| STM0589 | 10.27 | STY0767 | 766138  | 766971  | conserved     |
| STM0625 | 10.87 | STY4502 | 4395010 | 4396641 | dcuS          |
| STM0136 | 15.91 | STY2146 | 1995913 | 1996578 | yecA          |
| STM1746 | 54.03 | STY1384 | 1336894 | 1338507 | mppA          |
| STM2758 | 36.18 | STY1373 | 1328326 | 1328685 | pspC          |
| STM0957 | 16.07 | STY4460 | 4344317 | 4346383 | putative typ  |
| STM3137 | 26.71 | STY0057 | 57341   | 57790   | fkpB          |
| STM1149 | 26.51 | STY1039 | 1025144 | 1025593 | putative lipi |
| STM0591 | 34.83 | STY1420 | 1371928 | 1372083 | conserved     |
| STM0041 | 8.45  | STY3859 | 3714626 | 3716662 | yihQ          |
| STM3564 | 73.97 | STY4244 | 4110398 | 4111492 | livJ          |



|         |       |          |          |         |         |                    |
|---------|-------|----------|----------|---------|---------|--------------------|
| STM2727 | 32.8  |          | STY3669  | 3523084 | 3523272 | hypothetica        |
| STM0292 | 9.35  | aSTY0321 |          |         |         |                    |
| STM1598 | 11.65 | STY2674  |          | 2509322 | 2510614 | ptsJ putative tra  |
| STM0790 | 16.29 | STY2111  |          | 1962730 | 1963548 | yecE conserved     |
|         |       | STY4457  |          | 4326304 | 4327581 | putative typ       |
| STM3982 | 23.78 | STY3164  |          | 3036609 | 3037787 | yqeF probable ar   |
| STM4291 | 36.21 | STY3388  |          | 3231555 | 3231770 | rpsU 30S riboso    |
| STM0449 | 16.71 | STY3000  |          | 2873545 | 2874027 | iagB cell invasio  |
| STM4570 | 20.61 | STY3591  |          | 3443878 | 3444639 | udp uridine pho    |
| STM1612 | 5.12  | STY3940  |          | 3805127 | 3806527 | dnaA chromoson     |
| STM3587 | 17.26 | STY3219  |          | 3087302 | 3087961 | rpiA ribose 5-ph   |
| STM1836 | 10.05 | STY3626  |          | 3481759 | 3482499 | rffM probable U    |
| STM2360 | 15.66 | STY3253  |          | 3116628 | 3117332 | conserved          |
| STM1400 | 14.35 | STY3733  |          | 3585623 | 3585988 | rplL 50S riboso    |
| STM3640 | 32.62 | STY0589  |          | 596077  | 596631  | fimA type-1 fimb   |
| STM4059 | 39.45 | STY2125  |          | 1977243 | 1977632 | cheY chemotaxis    |
| STM3104 | 13.23 | STY3877  |          | 3732783 | 3734156 | hemN oxygen-ind    |
| STM3908 | 23.7  | STY3158  |          | 3031031 | 3031966 | lysR transcriptio  |
| STM4546 | 6.55  | STY3869  |          | 3724468 | 3725346 | hypothetica        |
| STM4285 | 16.26 | STY3612  |          | 3466407 | 3467231 | dapF diaminopir    |
| STM2957 | 5.69  |          | STY3657  | 3515196 | 3550387 | yifB               |
| STM2771 | 36.69 |          | aSTY2167 |         |         |                    |
| STM2445 | 11.61 | STY3074  |          | 2937019 | 2937753 | cysH 3'-phospho    |
| STM4486 | 20.97 | STY1493  |          | 1450372 | 1451382 | adhP alcohol def   |
|         |       | STY1454  |          | 1404648 | 1405628 | putative tra       |
| STM4577 | 4.46  | STY1423  |          | 1373904 | 1376540 | putative ex        |
| STM1287 | 8.31  | STY1393  |          | 1345254 | 1346150 | putative tra       |
| STM1506 | 37.18 | STY1520  |          | 1476670 | 1477695 | putative alc       |
| STM3357 | 9.11  | STY1551  |          | 1503716 | 1504402 | putative req       |
| STM4212 | 7.58  | STY1004  |          | 1001995 | 1003395 | asnS asparaginy    |
| STM0192 | 48.29 | STY0634  |          | 634904  | 635698  | fepC ferric enter  |
| STM0336 | 26.17 | STY0372  |          | 383443  | 384204  | stbB fimbrial cha  |
| STM1283 | 13.83 | STY1310  |          | 1270134 | 1270970 | possible m         |
| STM0621 | 5.42  | STY1476  |          | 1427430 | 1428467 | putative NA        |
| STM2221 | 8.98  | STY1964  |          | 1854312 | 1855121 | rrmA rRNA guan     |
| STM0125 | 13.28 | STYkdgA  |          | 1942582 | 1943223 | eda                |
| STM1935 | 45.63 | STY2141  |          | 1992209 | 1992712 | yecI ferritin-like |
| STM2777 | 30.03 | STYglxA2 |          | 569227  | 569708  | allA               |
| STM2265 | 8.4   | STY0585  |          | 592342  | 593727  | cysS cysteinyl-tF  |
| STM3601 | 35.86 |          |          |         |         |                    |
| STM1220 | 44.91 | STY0426  |          | 435467  | 436375  | yajF hypothetica   |
| STM1539 | 49.33 | STY3321  |          | 3168535 | 3169653 | hyb0 hydrogenas    |
| STM0092 | 11.5  | STY2952  |          | 2829862 | 2830941 | mltB membrane      |
| PSLT017 | 18.59 | STY4165  |          | 4024116 | 4025240 | hypothetica        |
| STM3131 | 17    | STY4865  |          | 4727571 | 4728101 | conserved          |
| STM3685 | 14.31 | STY2632  |          | 2465992 | 2466930 | pgtE outer mem     |
| STM3572 | 13.28 | STY4021  |          | 3882205 | 3883170 | yicL putative me   |
|         |       | STY3130  |          | 2998379 | 2999710 | argA N-acetylglu   |
|         |       | STY3174  |          | 3043600 | 3044676 | hypothetica        |
| STM0452 | 7.5   | STY3258  |          | 3120025 | 3121032 | conserved          |
|         |       | STY0508  |          | 515141  | 516001  | tesB acyl-CoA th   |

|         |       |         |          |         |                   |
|---------|-------|---------|----------|---------|-------------------|
| STM0129 | 9.72  | STY2926 | 2802627  | 2803961 |                   |
| STM1449 | 16.65 | STY4069 | 3927194  | 3927673 | coaD phosphopa    |
| STM3999 | 35.48 | STY3111 | 2979135  | 2979950 | exo 5'-3' exonu   |
| STM0537 | 7.61  | STY3163 | 3035343  | 3036179 | kdul 5-keto-4-de  |
| STM0528 | 51.34 |         |          |         |                   |
|         |       | STY3294 | 3140728  | 3141252 | hypothetica       |
| STM2858 | 5.73  | STY2950 | 2827753  | 2828814 | recA RecA prote   |
| STM0957 | 16.88 | STY2330 | 2159020  | 2159469 | wzb putative pr   |
| STM1049 | 54.95 |         | aSTY2469 |         |                   |
| STM3592 | 9.91  | STY4083 | 3940886  | 3941839 | waaC lipopolysac  |
| STM1975 | 23.31 | STY4362 | 4235716  | 4235994 | rpsS 30S ribosom  |
| STM0498 | 8.64  | STY3508 | 3347443  | 3348372 | conserved         |
| STM1216 | 9.78  | STY3433 | 3277638  | 3278585 | possible ca       |
| STM1452 | 42.25 | STY4211 | 4077083  | 4078552 | putative PT       |
|         |       | STY0949 | 938913   | 939773  | putative pir      |
| STM0706 | 13.14 | STY4783 | 4641842  | 4642486 | putative me       |
| STM3968 | 21.98 | STY4921 | 4781705  | 4782424 | deoD purine nucl  |
| STM3390 | 41.46 |         |          |         |                   |
| STM3369 | 28.21 | STY1814 | 1732760  | 1733035 | putative ex       |
|         |       | STY4688 | 4549751  | 4550992 | yjeH putative pe  |
| STM2551 | 22.03 | STY2945 | 2821463  | 2821888 | putative me       |
| STM1826 | 57.41 | STY2430 | 2259039  | 2260460 | sdaC putative L-s |
| STM0588 | 11.41 |         |          |         |                   |
| STM0339 | 22.93 | STY2380 | 2211940  | 2212623 | stcB putative fir |
| STM0356 | 16.53 | STY2409 | 2240981  | 2242339 | putative n-f      |
| STM4152 | 3.63  | STY1720 | 1640279  | 1641733 | sseC putative pa  |
| STM3584 | 17.98 | STY1090 | 1069479  | 1069931 | conserved         |
| STM4511 | 12.87 |         |          |         |                   |
| STM4250 | 9.08  | STY0875 | 864623   | 866203  | ybiP putative me  |
|         |       | STY1812 | 1731505  | 1732311 | xthA exodeoxyri   |
| STM0650 | 25.66 | STY3432 | 3275827  | 3277398 | garD D-galactara  |
| STM0816 | 30.24 | STY0850 | 843412   | 844518  | putative inr      |
| STM0671 | 38.44 | STY3212 | 3079659  | 3080861 | possible m        |
| STM3273 | 5.95  | STYnml  | 2009890  | 2011094 | fliB              |
| STM0600 | 15.52 | STY3404 | 3249773  | 3250741 | possible dr       |
| STM2441 | 34.51 | STY3233 | 3098929  | 3099585 | possible A        |
| STM0784 | 14.1  | STY1129 | 1094909  | 1095319 | putative ex       |
| STM2867 | 26.23 | STY2996 | 2869850  | 2870779 | AraC-famil        |
| STM1095 | 16.5  | STY4029 | 3890702  | 3891166 | fidL putative ex  |
|         |       | STY3341 | 3183611  | 3184066 | conserved         |
| STM1781 | 45.69 | STY1714 | 1636978  | 1637193 | ssaG putative pa  |
| STM2274 | 22.41 | STY1141 | 1104125  | 1105501 | hpaX putative 4-f |
| STM1491 | 10.61 | STY0811 | 807495   | 808970  | modF putative mc  |
|         |       | STY2722 | 2559162  | 2559362 | putative me       |
| STM0012 | 19.91 | STY2785 | 2642225  | 2644075 | hscA chaperone    |
| STM4192 | 36.02 | STY2720 | 2557647  | 2558003 | yffB conserved    |
| STM0981 | 41.64 | STY0524 | 531785   | 531952  | ybaM conserved    |
| STM1274 | 60.8  | STY1925 | 1818448  | 1818720 | putative me       |
| STM0124 | 25.07 | STY4411 | 4278739  | 4279011 | conserved         |
| STM0601 | 71.1  | STY4889 | 4751620  | 4751823 | conserved         |
| STM4049 | 24.42 | STY4278 | 4148814  | 4149140 | glpE conserved    |
| STM2147 | 32.5  | STY4247 | 4111691  | 4112074 | yhhK conserved    |

|         |       |          |         |         |         |              |
|---------|-------|----------|---------|---------|---------|--------------|
| STM1461 | 24.93 | STY4514  |         | 4405069 | 4405356 | putative Ge  |
| STM2404 | 17.18 |          |         |         |         |              |
| STM0937 | 42.03 | STY4638  |         | 4503667 | 4503894 | hypothetica  |
|         |       | STY4140  |         | 4004508 | 4005520 | yiaH         |
| STM4575 | 49.04 |          |         |         |         |              |
| STM1187 | 10.49 | STY0363  |         | 372529  | 373773  | yafA         |
| STM2499 | 9.4   | STY0004  |         | 3734    | 5020    | thrC         |
| STM1432 | 16.79 | STY1582  |         | 1530608 | 1530889 | asr          |
| STM1641 | 27.51 |          | STY1684 | 1611708 | 1611947 | conserved    |
| STM0014 | 46    | STY0036  |         | 33368   | 34363   | putative tra |
| STM2918 | 15.71 | STY0073  |         | 74013   | 74834   | dapB         |
| STM0017 | 45.04 |          | STY0038 | 34511   | 34816   | putative tra |
| STM2423 | 25.11 | STY0041  |         | 38773   | 39534   | putative ex  |
| STM0816 | 46.58 | STY1197  |         | 1156543 | 1156656 | conserved    |
| STM2011 | 37.36 |          |         |         |         |              |
| STM0571 | 25.15 | STY3455  |         | 3296202 | 3296750 | putative ac  |
| STM3616 | 22.61 | STY3412  |         | 3255451 | 3255936 | putative me  |
| STM0899 | 28.12 |          |         |         |         |              |
| STM2223 | 40.31 | STY0989  |         | 984996  | 985178  | conserved    |
| STM2593 | 70.28 |          |         |         |         |              |
| STM4067 | 10.55 | STY0798  |         | 795337  | 796056  | pnuC         |
| STM4323 | 9.86  |          |         |         |         |              |
| STM0335 | 4.06  |          |         |         |         |              |
| STM1178 | 27.87 |          |         |         |         |              |
| STM3028 | 15.13 |          |         |         |         |              |
| STM1786 | 7.96  |          |         |         |         |              |
| STM3386 | 35.66 |          |         |         |         |              |
| STM4533 | 53    | STY2128  |         | 1979723 | 1981384 | tar          |
| STM0032 | 61.15 | aSTY0046 |         |         |         |              |
| STM3677 | 68.95 | aSTY0118 |         |         |         |              |
| STM2559 | 69.1  | aSTY0259 |         |         |         |              |
|         |       | STY0321  |         | 331314  | 335378  | Rhs-family   |
| STM3241 | 67.19 | aSTY0973 |         |         |         |              |
| STM0893 | 60.7  | aSTY1011 |         |         |         |              |
| STM0911 | 56.21 |          |         |         |         |              |
| STM2597 | 70.1  |          |         |         |         |              |
| STM0475 | 70.63 | aSTY3570 |         |         |         |              |
| STM2953 | 15.8  | STY2053  |         | 1916899 | 1917150 | putative ba  |
| STM3923 | 18.14 | STY3632  |         | 3487969 | 3488850 | rffH         |
| STM3029 | 13.28 | STY3670  |         | 3523340 | 3523639 | possible lip |
| STM2772 | 62.46 | STY2889  | STY3695 | 2768199 | 2768771 | putative DN  |
|         |       | STY3950  |         | 3818303 | 3819430 | hypothetica  |
| STM3176 | 29.96 | STY1545  |         | 1498702 | 1499058 | putative pe  |
| STM1670 | 29.89 | STY2071  |         | 1926877 | 1927047 | putative ba  |
| STM2514 | 6.24  | STY2349  |         | 2187521 | 2188240 | putative ex  |
| STM2959 | 60.5  | aSTY2730 |         |         |         |              |
| STM0543 | 32.06 | STY3918  |         | 3780596 | 3781171 | stgA         |
| STM2619 | 15.63 | STY1361  |         | 1321082 | 1321351 | hypothetica  |
|         |       | STY1599  |         | 1541714 | 1541986 | hypothetica  |
| STM2767 | 32.97 | STY2351  |         | 2189209 | 2189652 | putative ex  |

|         |       |                   |         |         |       |               |
|---------|-------|-------------------|---------|---------|-------|---------------|
| STM0747 | 18.09 | STY2748           | 2585891 | 2586430 |       | putative ex   |
| STM2772 | 61.69 | aSTY2889 aSTY3695 |         |         |       |               |
| STM2746 | 11.2  | STY0203           | 212072  | 212686  | staE  | putative fir  |
| STM0395 | 18.32 | STY0323           | 336077  | 336370  |       | hypothetica   |
| STM0045 | 27.06 | STY0479           | 483985  | 484248  |       | probable se   |
| STM0927 | 29.59 | STY3692           | 3539686 | 3540279 |       | hypothetica   |
|         |       | STY3948           | 3816148 | 3817170 |       | hypothetica   |
| STM3104 | 9.63  | STY4208           | 4073368 | 4074021 |       | putative lipi |
| STM4399 | 9.62  | STY4521           | 4409652 | 4410686 |       | hypothetica   |
| STM2865 | 6.45  | STY4554           | 4437266 | 4438141 |       | hypothetica   |
| STM0926 | 2.64  | STY4573           | 4450338 | 4452761 |       | hypothetica   |
|         |       | STY4672           | 4536854 | 4537315 |       | hypothetica   |
|         |       | STY4825           | 4688741 | 4689370 |       | phage pola    |
| STM1009 | 7.18  | STY4594           | 4470678 | 4471577 |       | hypothetica   |
|         |       | STY4222           | 4087158 | 4088450 |       | putative me   |
| STM2754 | 14.57 | STY4526           | 4415107 | 4415664 |       | hypothetica   |
|         |       | STY4550           | 4433684 | 4434991 | pilV  | prepilin      |
|         |       | STY3018           | 2889969 | 2890376 | spak  | secretory p   |
| STM2224 | 9.45  | STY0532           | 539066  | 539710  | adk   | adenylate k   |
| STM2128 | 12.72 | STY2232           | 2062727 | 2063452 | cbiH  | precorrin-3   |
| STM2198 | 50.52 | STY3994           | 3859754 | 3861082 | uhpC  | regulatory p  |
| STM0622 | 63.89 | STY0069           | 69996   | 70865   | citE2 | citrate lyasi |
|         |       | STY0105           | 102467  | 103288  | ksgA  | dimethylad    |
| STM4556 | 3.92  | STY0254           | 266430  | 269912  | dnaE  | DNA polym     |
| STM2374 | 44.88 | STY3485           | 3329075 | 3329362 | nlp   | Ner-like re   |
| STM0844 | 26.92 | STY3524           | 3366017 | 3366490 | rpsI  | 30S riboso    |
| STM2759 | 10.18 | STY3557           | 3401700 | 3402704 |       | conserved     |
| STM0127 | 27.52 | STY0690           | 685657  | 686769  | mrdB  | rod shape-    |
| STM0828 | 56.93 | STY0707           | 703291  | 704016  | gltL  | glutamate/    |
| PSLT039 | 2.47  | STY0191           | 200408  | 202798  | gcd   | glucose de    |
| STM2428 | 20.42 | STY0213           | 222159  | 222689  | ligT  | 2'-5' RNA li  |
|         |       | STY0247           | 259264  | 261675  | yaeT  | outer mem     |
| STM3136 | 58.64 | STY1553           | 1504853 | 1506319 |       | putative D-   |
| STM0814 | 5.48  | STY1522           | 1478591 | 1479682 |       | putative se   |
| STM4095 | 21.75 |                   |         |         |       |               |
| STM0192 | 19    | STY4242           | 4107915 | 4108970 | ftsX  | cell divisio  |
| STM0196 | 8.6   | STY4909           | 4769681 | 4770361 |       | conserved     |
| STM1522 | 37.35 | STY0278           | 294737  | 295912  |       | putative dru  |
| STM3920 | 3.71  | STY0354           | 361943  | 364387  |       | possible ac   |
| STM1383 | 4.81  | STY1089           | 1067533 | 1069293 |       | conserved     |
|         |       | aSTY4625          |         |         |       |               |
|         |       | aSTY3677          |         |         |       |               |
| STM1785 | 24.26 |                   |         |         |       |               |
| STM4367 | 24.16 |                   |         |         |       |               |
| STM3467 | 12.74 | STY1095           | 1072728 | 1074881 |       | putative me   |
| STM0041 | 8.47  | STY1155           | 1115313 | 1115990 | wrbA  | trp repress   |

|         |       |         |          |              |               |
|---------|-------|---------|----------|--------------|---------------|
| STM0778 | 8.21  | STY1193 | 1154032  | 1155084      | conserved     |
| STM4256 | 16.65 | STY3886 | 3742558  | 3743142 mobA | molybdopte    |
| STM4283 | 20.37 | STY1138 | 1101924  | 1102304 hpcD | 5-carboxyn    |
|         |       | STY1175 | 1137732  | 1138262      | putative me   |
| STM0920 | 36.71 | STY1235 | 1189783  | 1190019 acpP | acyl carrier  |
| STM0788 | 3.99  | STY1256 | 1208383  | 1211829 mfd  | transcriptio  |
| STM4465 | 5.42  | STY4272 | 4137658  | 4139844 glgB | 1,4-alpha-c   |
| STM1622 | 30.8  | STY1187 | 1146694  | 1148229 mdoG | periplasmic   |
| STM0150 | 3.84  | STY4301 | 4178276  | 4180480 yrfF | putative me   |
| STM3764 | 8.69  |         |          |              |               |
| STM2672 | 10.13 | STY1834 | 1753477  | 1754970      |               |
|         |       | STY3867 | 3723230  | 3724471      |               |
| STM2037 | 62.01 | STY3783 | 3648715  | 3649560 glpF | glycerol up   |
| STM2782 | 11.46 |         |          |              |               |
| STM1000 | 20.16 |         |          |              |               |
| STM3851 | 15.69 | STY4466 | 4351271  | 4352620      | putative xa   |
| STM1498 | 58.55 | STY4503 | 4397074  | 4399424 dmsA |               |
| STM3056 | 6.22  |         |          |              |               |
| STM2353 | 34.54 | STY0922 | 913995   | 914711 artQ  | arginine tra  |
| STM3241 | 5.5   | STY2654 | 2490763  | 2492187 gltX | glutamyl-tR   |
| STM2595 | 76.1  |         |          |              |               |
| STM2481 | 6.18  | STY0935 | 927559   | 929217       | conserved     |
| STM3905 | 11.85 | STY1006 | 1004375  | 1005590      |               |
| STM1009 | 10.17 |         |          |              |               |
| STM3003 | 26.15 |         |          |              |               |
| STM3609 | 24.91 | STY4489 | 4376088  | 4377590 proP | ProP          |
| STM2211 | 34.66 | STY4694 | 4556104  | 4556670 efp  | elongation    |
| STM0447 | 11.68 | STY2615 | 2448733  | 2449557 mepA | penicillin-in |
| STM0034 | 24.88 | STY2659 | 2496555  | 2497316 yfeN | conserved     |
|         |       | STY2713 | 2546128  | 2547171      | putative ex   |
| STM2505 | 79.69 |         | aSTY2746 |              |               |
| STM0608 | 3.73  | STY2999 | 2871866  | 2873527 iagA | invasion pr   |
| STM0887 | 64.2  | STY4711 | 4571986  | 4572750 artJ | probable ai   |
| STM1712 | 26.08 | STY4748 | 4606459  | 4606773 priB | primosoma     |
| STM2752 | 3.93  | STY2485 | 2313369  | 2315855 napA | probable ni   |
| STM3512 | 63.02 |         | aSTY4820 |              |               |
| STM0523 | 13.97 | STY2565 | 2401589  | 2402083      | conserved     |
| STM3241 | 6.47  | STY2556 | 2391513  | 2393315 nuoC | NADH deh      |
| STM3773 | 21.83 |         |          |              |               |
| STM0830 | 41.05 | STY2162 | 2007417  | 2008217 fliY | cystine-bin   |
| STM0447 | 32.83 | STY4355 | 4231652  | 4232128 bfr  | bacteriofer   |
|         |       | STY1096 | 1074900  | 1075346 yccF | putative me   |
| STM0877 | 23.55 | STY1262 | 1217163  | 1218290 potD | spermidine    |
| STM0925 | 11.6  | STY2704 | 2537563  | 2538252      | putative etf  |
| STM0879 | 44.37 | STY1265 | 1220668  | 1221531 potB | spermidine    |
| STM0850 | 5.3   | STY1783 | 1704611  | 1705570      | putative ou   |
| PSLT016 | 22.86 | STY4728 | 4591236  | 4591934 yjfJ |               |
| STM0221 | 11.79 | STY4763 | 4620872  | 4621429 ytfJ | putative ex   |
| STM2372 | 56.34 |         |          |              |               |
| STM3538 | 14.69 | STY1182 | 1142423  | 1142749      | conserved     |
| STM2986 | 10.1  | STY2000 | 1881004  | 1881918      | putative me   |
| STM2799 | 56.78 | STY1299 | 1258003  | 1258416 hns  | DNA-bindir    |

|         |       |         |         |         |      |               |
|---------|-------|---------|---------|---------|------|---------------|
| STM0529 | 15.8  | STY1212 | 1167706 | 1168365 | flgA | flagellar ba  |
| STM0724 | 10.71 |         |         |         |      |               |
| STM3901 | 34.05 | STY3986 | 3851123 | 3852811 | ilvB | acetohydro    |
| STM2406 | 18.87 | STY3914 | 3775131 | 3775550 | atpC | ATP synth     |
| STM4343 | 8.26  | STY2834 | 2696031 | 2697653 | nadB | L-aspartate   |
| STM2644 | 11.13 | STY0270 | 282594  | 283301  | yaeB | conserved     |
| STM4220 | 9.54  | STY0109 | 108222  | 109034  | djIA | DnaJ-like p   |
| STM4269 | 11.66 | STY2614 | 2447924 | 2448733 | yfcA | putative me   |
| STM0426 | 10.21 | STY1766 | 1689176 | 1689889 |      | conserved     |
| STM0173 | 9.06  | STY1762 | 1685253 | 1686086 |      | conserved     |
| STM1572 | 62.03 | STY1002 | 1000298 | 1001389 | ompF | outer mem     |
|         |       | STY4250 | 4114588 | 4115865 | livM | high-affinity |
| STM1734 | 6.85  | STY1708 | 1633485 | 1634477 | ssaL | putative se   |
| STM0692 | 6.09  | STY2483 | 2311811 | 2312680 | napH | ferredoxin-   |
| STM0276 | 90.9  |         | 315281  | 315766  |      | conserved     |
| STM0231 | 13.18 | STY4906 | 4767703 | 4768731 |      | conserved     |
| STM1498 | 20.18 | STY4158 | 4016623 | 4018956 | bisC | biotin sulfo  |
| STM1698 | 5.5   | STY3439 | 3283987 | 3285258 |      |               |
|         |       | STY3462 | 3304064 | 3304948 |      | conserved     |
| STM2413 | 23.79 | STY2653 | 2490327 | 2490719 | yfeD | conserved     |
| STM2522 | 8.91  |         | 2618487 | 2619170 |      | putative me   |
| STM0245 | 30.18 | STY0558 | 564336  | 565166  | sfbA | lipoprotein   |
| STM0634 | 13.38 | STY0651 | 652161  | 653063  | ybdO | putative lys  |
| STM2816 | 8.97  |         |         |         |      |               |
| STM2350 | 10.24 | STY4923 | 4783207 | 4784223 | lplA | lipoate-prol  |
| STM4187 | 42.93 | STY4131 | 3993461 | 3994261 | viaJ | putative tra  |
| STM1142 | 11.61 | STY4197 | 4063347 | 4063949 | yhjB | hypothetica   |
| STM0789 | 15.55 | STY4201 | 4068168 | 4068887 |      | gntR family   |
| STM0312 | 39.48 |         |         |         |      |               |
| STM4325 | 11.78 | STY4797 | 4658590 | 4659036 |      | putative me   |
| STM2068 | 13.07 | STY1743 | 1663367 | 1664710 |      | putative an   |
| STM3635 | 4.68  | STY4492 | 4379502 | 4381145 |      | putative me   |
| STM0019 | 11.71 | STY1207 | 1164050 | 1164973 | mviM | putative vir  |
| STM3200 | 11.01 | STY2695 | 2527466 | 2528827 | eutB | ethanolami    |
| STM2539 | 28.44 | STY3850 | 3706680 | 3707117 | yihZ | conserved     |
| STM4532 | 5.59  | STY0683 | 679625  | 680590  | lipA | lipoic acid s |
| STM1980 | 34.1  | STY1700 | 1627076 | 1627342 | ssaS | putative typ  |
|         |       | STY2240 | 2068997 | 2070421 | cbiA | cobyrinic a   |
| STM2913 | 10.29 | STY4096 | 3954197 | 3955018 | cysE | serine acet   |
| STM4275 | 13.36 | STY0846 | 839949  | 840911  | ybhN | putative me   |
| STM2219 | 17.5  | STY0816 | 811736  | 812794  | modC | molybdenu     |
| STM1888 | 48.56 | STY1744 | 1665112 | 1666524 | pykF | pyruvate ki   |
| STM1951 | 41.79 | STY2581 | 2417151 | 2417927 | hisP | histidine tra |
|         |       | STY0132 | 133581  | 135152  | leuA | 2-isopropyl   |
| STM3348 | 37.85 | STY0231 | 241500  | 242927  | htrA | protease D    |
| STM4170 | 68.55 | STY0493 | 500253  | 500525  | hupB | DNA-bindir    |
| STM1801 | 5.72  | STY4388 | 4248355 | 4249731 | trkA | potassium     |
| STM1196 | 34.26 | STY3004 | 2876422 | 2876670 | sipF | probable ar   |
| STM0023 | 44.16 | STY0593 | 598006  | 600618  | fimD | outer mem     |
| STM2253 | 15    | STY0772 | 769551  | 770597  |      | putative me   |
| STM4416 | 14.66 | STY0782 | 781859  | 782728  | sucD | succinyl-Cc   |
| STM4005 | 43.9  | STY3711 | 3561370 | 3562695 | hydG | transcriptio  |

|         |       |         |            |         |              |              |
|---------|-------|---------|------------|---------|--------------|--------------|
| STM2565 | 24.48 | STY4210 |            | 4076233 | 4076991      | conserved    |
| STM3638 | 5.8   | STY2245 |            | 2074535 | 2076199 pduC | glycerol de  |
| STM3579 | 10.31 |         | aSTY3006   |         |              |              |
| STM2850 | 12.43 | STY2552 |            | 2385945 | 2386922 nuoH | NADH deh;    |
| STM1441 | 6.69  | STY3545 |            | 3383598 | 3385565 yhcP | putative me  |
| STM4257 | 40.16 |         | STY4452; ; | 4322993 | 4323625      | putative ex  |
| STM3056 | 8.04  | STY2856 |            | 2726224 | 2727345 tyrA | chorismate   |
| STM0041 | 12.91 | STY1177 |            | 1139160 | 1139576 csgF | assembly/t   |
| STM3885 | 18.82 | STY3854 |            | 3709607 | 3710530 yihV | putative su  |
| STM2791 | 14.7  | STY3716 |            | 3566012 | 3566620 yjaG | conserved    |
| STM2272 | 14.81 | STY2968 |            | 2845058 | 2845468 hycH | formate hy   |
| STM4018 | 63.76 | STY3861 |            | 3718136 | 3719557      | putative me  |
| STM0852 | 7.84  | STY0716 |            | 711231  | 712697 miaB  | MiaB prote   |
| STM0109 | 29.34 | STY0498 |            | 504580  | 506280 ybaE  | putative so  |
| STM0646 | 5.33  | STY4475 |            | 4361222 | 4362658 nrfA | cytochrome   |
| STM2517 | 17.39 | STY1395 |            | 1347328 | 1349310      | invasin-like |
| STM3261 | 13.58 | STY3563 |            | 3407332 | 3408213 prmA | ribosomal p  |
| STM1642 | 6.37  | STY3128 |            | 2995296 | 2996393 mltA | membrane     |
| STM2974 | 7.83  | STY3041 |            | 2909280 | 2909918      | possible su  |
| STM0398 | 19.58 | STY3813 |            | 3675681 | 3677054 cpxA | two-compo    |
| STM3794 | 41.24 | STY0897 |            | 891157  | 891915 deoR  | deoxyribos   |
| STM3370 | 42.45 | STY3616 |            | 3470104 | 3470424 cyaY | CyaY prote   |
| STM3531 | 13.73 | STY3653 |            | 3509746 | 3511596 ilvD | dihydroxya   |
| STM1356 | 57.14 | STY0083 |            | 85326   | 86468 caiA   | probable c:  |
| STM2982 | 26.31 | STY3655 |            | 3512700 | 3512960 ilvM | acetohydro   |
| STM0747 | 18.54 |         | STY2769    | 2621651 | 2622625 yfgA | putative DN  |
|         |       | STY1944 |            | 1833688 | 1834395 minC | septum site  |
|         |       | STY1321 |            | 1278795 | 1279310      | conserved    |
| STM4285 | 19.47 | STY3113 |            | 2981207 | 2981854 fucA | fuculose-1-  |
| STM3899 | 4.3   | STY3061 |            | 2925121 | 2926167 iap  | alkaline ph  |
| STM3964 | 12.56 | STY3596 | aSTY3595   | 3450821 | 3451720 yigM | putative me  |
|         |       | STY3621 |            | 3474982 | 3475923 hemC | porphobilin  |
| STM2850 | 21.66 | STY3738 |            | 3588809 | 3589192 secE | preprotein i |
| STM2971 | 69.8  | STY1956 |            | 1844980 | 1846344 sdaA | L-serine de  |
| STM4189 | 22.34 | STY1281 |            | 1235888 | 1236988 chaA | putative ca  |
| STM2913 | 11.93 | STY1907 |            | 1800435 | 1802120      | putative su  |
| STM0574 | 39.02 | STY1961 |            | 1851971 | 1852822 manZ | phosphotra   |
| STM2497 | 9.89  | STY2080 |            | 1934303 | 1935178      | putative ca  |
| STM1446 | 9.56  | STY2109 |            | 1960070 | 1961842 aspS | aspartyl-tR  |
| STM2915 | 53.3  | STY0566 |            | 572484  | 573260 hyi   | hydroxypyr   |
| STM3737 | 8.04  |         | STY0586    | 593818  | 594366 ybcl  | putative me  |
|         |       |         | STY0616; ; | 614326  | 614766       | hypothetica  |
| STM0400 | 49.53 | STY1481 |            | 1433410 | 1434930 ansP | L-asparagi   |
| STM1117 | 16.84 | STY1446 |            | 1398335 | 1399126      | putative re  |
| STM3537 | 38.15 |         | STY1505    | 1463253 | 1465064 glgX | putative gly |
| STM3855 | 8.07  | STY1931 |            | 1824291 | 1825589 dadA | D-amino ac   |
| STM1567 | 18.35 |         |            |         |              |              |
| STM1253 | 51.9  |         | STY1431    | 1383466 | 1383870      | putative cy  |
| STM0370 | 8.83  | STY1397 |            | 1350263 | 1350820      | putative thi |
| STM3388 | 30.84 | STY1349 |            | 1307186 | 1309168      | conserved    |
| STM0052 | 56.44 | STY0675 |            | 674421  | 675101 dpiA  | transcriptio |
| STM3695 | 14.34 | STY0986 |            | 982691  | 983668 lpxK  | tetraacyldis |

|         |       |         |          |         |         |               |
|---------|-------|---------|----------|---------|---------|---------------|
| STM4470 | 9.22  | STY0961 | 954308   | 955600  | serS    | seryl-tRNA    |
|         |       | STY3251 | 3114814  | 3115500 | kdgR    | probable gl   |
| STM2162 | 6.43  | STY0501 | 507959   | 509014  |         | putative lya  |
| STM3106 | 33.75 |         | STY4203  | 4069850 | 4070180 |               |
| STM2099 | 8.42  | STY3204 | 3069440  | 3070420 |         | conserved     |
| STM2531 | 17.41 | STY4112 | 3973306  | 3973914 |         | putative gl   |
| STM2530 | 14.16 |         | aSTY4036 |         |         |               |
| STM2791 | 12.62 | STY3355 | 3198957  | 3200306 |         | probable tv   |
| STM4544 | 6.31  | STY2870 | 2739173  | 2740834 | recN    | DNA repair    |
| STM3618 | 32.26 |         | STY3202  | 3068542 | 3068889 | conserved     |
| STM1032 | 3.16  |         |          |         |         |               |
| STM0816 | 35.34 | STY4225 | 4093033  | 4094257 |         |               |
| STM1885 | 4.44  | STY4178 | 4037181  | 4038752 | yhjS    | conserved     |
| STM3631 | 11.7  | STY4046 | 3906477  | 3907868 |         | putative pu   |
| STM2123 | 14.33 | STY2859 | 2729376  | 2730596 | yfiN    | putative me   |
| STM2772 | 60.26 |         | STY4608  | 4481369 | 4481590 | pin           |
| STM4284 | 6.49  | STY3243 | 3107377  | 3108531 | metK    | S-adenosyl    |
|         |       | STY0486 | 490748   | 492223  | ampG    | AmpG prot     |
| STM0325 | 5.81  |         |          |         |         |               |
| STM2128 | 34.25 | STY2340 | 2173488  | 2176610 | yegN    | putative RM   |
| STM4483 | 37.28 | STY2401 | 2233585  | 2234346 | yohF    | putative ox   |
| STM2223 | 21.89 | STY4385 | 4246732  | 4247100 | yhdN    | conserved     |
| STM2441 | 18.36 | STY0938 | 931425   | 933371  | ybjZ    | conserved     |
| STM3677 | 65.46 | STY4744 | 4604495  | 4605181 | sgaE    | probable cl   |
| STM2851 | 16.97 | STY4817 | 4678442  | 4679542 |         | putative inr  |
| STM3314 | 13.86 | STY0927 | 917387   | 918217  |         | putative N-   |
| STM2768 | 17.08 | STY4724 | 4586962  | 4587387 | yjeB    | conserved     |
| STM2281 | 5.86  | STY3428 | 3269977  | 3270915 | tdcA    | TDC opero     |
| STM1538 | 27.65 | STY3318 | 3164678  | 3166381 | hybC    | hydrogena:    |
| STM2751 | 46.93 | STY2955 | 2832739  | 2833101 | srlB    | PTS system    |
| STM3169 | 3.52  | STY2964 | 2840627  | 2842867 | hypf    | hydrogena:    |
| STM0499 | 43.59 |         |          |         |         |               |
| STM2321 | 10.68 | STY2970 | 2846232  | 2846774 | hycF    | formate hy    |
| STM0488 | 21.18 | STY2461 | 2292820  | 2293104 | rplY    | 50s ribosor   |
| STM3691 | 7.19  | STY2322 | 2151705  | 2152259 | wcaF    | putative ac   |
| STM2777 | 10.28 | STY2434 | 2262909  | 2264900 | cirA    | colicin I rec |
| STM4385 | 11.55 | STY1897 | 1792009  | 1792863 | kdsA    | 2-dehydro-    |
| STM0963 | 10.75 | STY3247 | 3111874  | 3112605 |         | conserved     |
| STM2144 | 13.3  | STY0758 | 758250   | 758990  |         | hypothetica   |
| STM1385 | 2.52  | STY0831 | 829029   | 831050  | uvrB    | excision nu   |
| STM1356 | 10.22 |         |          |         |         |               |
| STM3541 | 40.26 | STY3503 | 3342185  | 3342457 | ptsO    | phosphoca     |
| STM0950 | 78.39 | STY4025 | 3888370  | 3889050 | slsA    | conserved     |
| STM1062 | 48.99 | STY0879 | 869549   | 871144  | ybiT    | ABC transp    |
| STM0209 | 39.51 | STY3528 | 3369026  | 3370393 | degQ    | serine prot   |
| STM3782 | 43.71 | STY3443 | 3286056  | 3287429 | gatC    | PTS system    |
|         |       | STY3371 | 3213820  | 3214491 | dsbA    | disulfide isc |
| STM2830 | 7.05  | STY2492 | 2321227  | 2322279 | yojL    | thiamine bi   |
| STM2440 | 24.82 | STY0790 | 787814   | 788218  | ybgC    | conserved     |
| STM4401 | 7.92  | STY3479 | 3323177  | 3324610 |         | Penicillin-b  |
| STM2311 | 51.29 | STY3409 | 3254294  | 3254599 |         | conserved     |
| STM0629 | 70    | STY4153 | 4012626  | 4012838 | cspA    | cold shock    |



|         |       |          |          |         |              |               |
|---------|-------|----------|----------|---------|--------------|---------------|
|         |       | STY3229  |          | 3096533 | 3096958      | conserved     |
| STM0898 | 32.66 |          | STY0774  | 772118  | 772363       | hypothetica   |
| STM0145 | 20.89 | STY0822  |          | 818643  | 819368 hutC  | histidine uti |
| STM1793 | 59.88 | STY0787  |          | 785900  | 787039 cydB  | cytochrome    |
| STM0096 | 43.44 | STY4066  |          | 3925835 | 3926071 rpmB | 50S riboso    |
| STM1651 | 18.12 | STY2993  |          | 2867765 | 2868070 prgJ | pathogenic    |
|         |       | STY1707  |          | 1633059 | 1633427 ssaM | putative pa   |
| STM4238 | 22.39 | STY1953  |          | 1842510 | 1842689      | conserved     |
| STM2368 | 30    | STY0613  |          | 613438  | 613674       | hypothetica   |
| STM3524 | 12.21 | STY1731  |          | 1651581 | 1652540      | putative pa   |
| STM4491 | 40.22 | STY4289  |          | 4163888 | 4164124 yhgG | conserved     |
|         |       | STY3737  |          | 3588262 | 3588870 nusG | transcriptio  |
| STM1625 | 16.44 | STY3708  |          | 3551580 | 3552416      | possible Ly   |
| STM3191 | 19.5  | STY3579  |          | 3431563 | 3433386      | possible tra  |
| STM2713 | 21.83 |          | aSTY4617 |         |              |               |
| STM4558 | 20.1  | STY1475  |          | 1426703 | 1427218      | putative ac   |
| STM0145 | 5.53  | STY0119  |          | 119492  | 120994 araA  | L-arabinosi   |
| STM0685 | 47.33 |          | STY1657  | 1588113 | 1588283 malX |               |
|         |       | STY1876  |          | 1780271 | 1780444      | hypothetica   |
|         |       | STY3003  |          | 2876118 | 2876378      | doubtful CF   |
| STM2080 | 50.94 | STY2916  |          | 2798595 | 2798753      | conserved     |
| STM4581 | 34.5  | STY0133  |          | 135240  | 135326 leuL  | leu operon    |
|         |       |          | STY4604  | 4479078 | 4479197      | hypothetica   |
| STM1528 | 46.48 |          | aSTY1533 |         |              |               |
| STM0994 | 52.03 | STY3985  |          | 3850918 | 3851016 ivbL | ilvBN operc   |
|         |       | STY3469  |          | 3313654 | 3314076      | conserved     |
| STM3674 | 11.17 | STY3472  |          | 3316930 | 3318267      | PGM/PMM       |
| STM0903 | 23.64 | STY1036  |          | 1023687 | 1024484      | putative pro  |
| STM0325 | 23.61 |          |          |         |              |               |
| STM3672 | 37.03 | STY0789  |          | 787304  | 787585       | putative me   |
| STM0660 | 10.4  |          |          |         |              |               |
| STM1170 | 17.25 |          |          |         |              |               |
| STM3997 | 37.33 | STY4845  |          | 4703505 | 4704156      |               |
| STM1246 | 60.2  |          |          |         |              |               |
| STM2761 | 12.46 |          |          |         |              |               |
| STM1871 | 71.32 |          |          |         |              |               |
| STM2473 | 60.35 | aSTY0007 |          |         |              |               |
| STM1572 | 22.9  |          | aSTY2203 |         |              |               |
| STM3922 | 55.46 | aSTY2307 |          |         |              |               |
| STM3858 | 39.91 | aSTY2439 |          |         |              |               |
| STM4334 | 30.14 |          | aSTY2447 |         |              |               |
| STM3830 | 13.11 | aSTY3325 |          |         |              |               |
| STM3152 | 30.24 | aSTY3394 |          |         |              |               |
| STM0973 | 66.68 | aSTY3423 |          |         |              |               |
| STM0209 | 33.98 | aSTY3528 |          |         |              |               |
| STM0922 | 69.24 |          |          |         |              |               |
|         |       | STY2061  |          | 1921742 | 1922554      | conserved     |

|         |       |         |          |         |         |       |              |
|---------|-------|---------|----------|---------|---------|-------|--------------|
| STM1861 | 24.91 | STY2077 |          | 1932482 | 1933558 |       | putative int |
| STM2085 | 17.58 | STY2356 |          | 2191545 | 2191823 |       | hypothetica  |
|         |       | STY2885 | STY3699  | 2765868 | 2765987 |       | putative ba  |
| STM0150 | 6.42  | STY0115 |          | 116031  | 117239  |       | putative IS  |
|         |       | STY0312 |          | 325657  | 326130  |       | probable se  |
| STM0995 | 13.32 | STY3644 |          | 3502694 | 3503437 |       | probable ui  |
|         |       | STY3672 |          | 3525240 | 3526154 |       | hypothetica  |
| STM3986 | 40.47 | STY3688 |          | 3536323 | 3536682 |       | phage base   |
| STM0624 | 8.06  | STY3066 |          | 2927865 | 2928569 |       | conserved    |
|         |       | STY0296 |          | 311765  | 312055  |       | hypothetica  |
| STM3515 | 7.43  | STY0345 |          | 351764  | 352474  | tcfA  | putative fir |
| STM0149 | 5.87  | STY3674 |          | 3526926 | 3527963 |       | probable ca  |
| STM4201 | 8.25  | STY3690 | STY4612  | 3537570 | 3538175 |       | putative ph  |
| STM2592 | 6.06  | STY3922 |          | 3784535 | 3785602 | stgD  | probable fir |
| STM4495 | 38.17 | STY1367 |          | 1323331 | 1323468 |       | hypothetica  |
|         |       | STY1601 |          | 1542275 | 1542850 | gam   | bacterioph   |
|         |       | STY1618 |          | 1554283 | 1554741 |       | putative ba  |
|         |       | STY2883 | STY3701  | 2762316 | 2762810 |       | putative ba  |
| STM1680 | 3.9   | STY3070 |          | 2931004 | 2932539 |       | hypothetica  |
| STM2722 | 12.92 | STY4627 | aSTY3675 | 4493201 | 4494967 |       | probable te  |
|         |       | STY4651 |          | 4510583 | 4512553 | vexE  | Vi polysacc  |
| STM2006 | 29.41 | STY4676 |          | 4538390 | 4539172 |       | hypothetica  |
| STM0243 | 12.71 |         | STY4829  | 4691273 | 4691656 | cl    | phage imm    |
|         |       | STY4560 |          | 4441022 | 4441522 |       | hypothetica  |
| STM1576 | 4.26  | STY4577 |          | 4454829 | 4456259 |       | hypothetica  |
|         |       | STY4883 |          | 4743384 | 4744970 | hsdM  |              |
| STM0580 | 5.36  | STY4635 |          | 4499824 | 4502238 |       | conserved    |
|         |       | STY4656 |          | 4516537 | 4518273 | tviE  | Vi polysacc  |
| STM3306 | 55.37 | STY4673 |          | 4537312 | 4537533 | cII   | transcriptio |
| STM3178 | 13.58 | STY4490 |          | 4377757 | 4378836 | pmrB  | two-compo    |
| STM2740 | 28.11 |         |          |         |         |       |              |
| STM1216 | 4.86  | STY3904 |          | 3765436 | 3767325 | gidA  | glucose inh  |
|         |       | STY3499 |          | 3338936 | 3340369 | rpoN  | RNA polym    |
| STM3835 | 44.84 | STY3359 |          | 3201464 | 3203356 | parE  | topoisomer   |
| STM2432 | 19.8  | STY3483 |          | 3327301 | 3327612 | rplU  | 50S riboso   |
| STM0619 | 50.82 | STY0072 |          | 72925   | 73833   | citG2 | citg protein |
| STM2776 | 8.37  | STY0154 |          | 158349  | 159266  | lpxC  | UDP-3-O-[:   |
| STM1452 | 24.13 | STY0189 |          | 198171  | 198518  | yacC  | conserved    |
| STM0356 | 13.66 | STY0210 |          | 219841  | 220737  | yadB  | glutamyl-tR  |
| STM2274 | 18.81 | STY0245 |          | 257011  | 257868  | cdsA  | phosphatid   |
| STM1542 | 37.29 |         | aSTY1555 |         |         |       |              |
| STM2804 | 3.39  | STY3549 |          | 3389538 | 3393338 |       | possible ex  |
| STM3208 | 21.55 | STY0680 |          | 678420  | 679207  |       |              |
| STM0657 | 48.31 |         |          |         |         |       |              |
| STM2039 | 4.61  | STY0725 |          | 725520  | 726926  | ybfM  | putative ou  |
| STM2249 | 11.01 | STY0754 |          | 755920  | 756654  |       | conserved    |

|         |       |         |         |         |         |      |               |
|---------|-------|---------|---------|---------|---------|------|---------------|
|         |       | STY2635 |         | 2470438 | 2471631 | pgtC | phosphogly    |
| STM1956 | 5.3   | STY2311 |         | 2140648 | 2141926 | wcaK |               |
| STM4574 | 49.04 |         |         |         |         |      |               |
| PSLT082 | 7.23  | STY0305 |         | 317713  | 319014  |      | putative me   |
| STM0685 | 18.41 |         |         |         |         |      |               |
| STM1088 | 30.39 | STY2897 |         | 2779866 | 2780918 |      | conserved     |
| STM0924 | 59.69 |         |         |         |         |      |               |
| STM2660 | 20.09 | STY0294 |         | 309016  | 311679  |      | ClpB-like p   |
| STM2833 | 30.76 |         |         |         |         |      |               |
| PSLT101 | 28.19 | STY0368 |         | 378398  | 378796  |      | probable se   |
| STM2780 | 35.37 | STY1117 |         | 1086906 | 1087781 | pipB | conserved     |
| STM0499 | 40.2  | STY4386 |         | 4247111 | 4247536 | zntR | putative Zn   |
|         |       | STY4332 |         | 4214265 | 4214669 | yhfA | conserved     |
| STM1061 | 12.4  | STY1103 |         | 1079782 | 1080993 |      | conserved     |
| STM3359 | 11.67 | STY1561 |         | 1510962 | 1511522 | speG | spermidine    |
| STM0048 | 16.16 | STY4343 |         | 4222599 | 4223189 | slyD | FKBP-type     |
| STM2987 | 15.46 | STY4304 |         | 4184063 | 4184842 | yrfD | conserved     |
| STM3972 | 10.25 | STY1278 |         | 1233870 | 1235120 | icdA | isocitrate d  |
| STM4185 | 15.37 | STY1839 |         | 1756268 | 1757062 |      | putative tra  |
| STM0086 | 16.91 | STY4341 |         | 4220489 | 4222294 | kefB | glutathione   |
| STM3638 | 9.01  | STY1249 |         | 1202272 | 1203297 |      | putative gly  |
| STM4492 | 16.52 | STY1871 |         | 1778004 | 1778474 |      | putative he   |
| STM2517 | 50.89 |         |         |         |         |      |               |
| STM3801 | 4.95  | STY3828 |         | 3689433 | 3690259 | rhaD |               |
| STM1651 | 7.54  |         |         |         |         |      |               |
| STM3883 | 23.01 | STY3794 |         | 3658357 | 3659358 | ydeZ | putative AE   |
| STM3826 | 11.42 |         |         |         |         |      |               |
| STM2168 | 29.19 | STY2982 |         | 2858736 | 2859080 | ygbA | conserved     |
| STM3248 | 45.17 |         | STY3043 | 2910690 | 2911210 | ygbJ |               |
| STM2403 | 14.84 | STY2608 |         | 2442887 | 2443543 |      | conserved     |
| STM2503 | 31.13 | STY2651 |         | 2487168 | 2489357 | yfeA | putative me   |
| STM4526 | 6.45  |         |         |         |         |      |               |
|         |       | STY2723 |         | 2559389 | 2561440 |      | conserved     |
| STM0956 | 27.02 | STY0955 |         | 943885  | 945651  | cydD | transport A   |
| STM0926 | 92    |         |         |         |         |      |               |
|         |       | STY3788 |         | 3653687 | 3654283 | yjiQ | conserved     |
| STM3222 | 4.23  | STY4421 |         | 4289054 | 4291150 |      | putative lipi |
| STM3512 | 20.29 | STY3038 |         | 2906016 | 2907512 |      | possible pe   |
| STM1199 | 9.13  |         |         |         |         |      |               |
| STM0056 | 9.56  |         | STY0914 | 907010  | 907483  |      | putative me   |
| STM1022 | 24.34 |         |         |         |         |      |               |
| STM1043 | 62.53 |         |         |         |         |      |               |
|         |       | STY2770 |         | 2622919 | 2624085 | yfgB | conserved     |
| STM0790 | 6.78  | STY1759 |         | 1680209 | 1681327 |      | putative me   |
| STM3279 | 26.89 | STY2145 |         | 1994627 | 1995838 | tyrP | tyrosine-sp   |
| STM0203 | 20.24 | STY2202 |         | 2040217 | 2040528 |      | putative me   |
| STM2851 | 19.33 |         |         |         |         |      |               |
| STM3655 | 7.84  |         |         |         |         |      |               |
|         |       | STY4873 |         | 4734624 | 4735895 |      | putative me   |
| STM3576 | 40.98 | STY4857 |         | 4720737 | 4720994 |      | hypothetica   |
|         |       | STY2597 |         | 2433710 | 2434624 | accD | acetyl-CoA    |
|         |       | STY1268 |         | 1224135 | 1225469 |      | hypothetica   |

|         |       |          |         |         |      |              |
|---------|-------|----------|---------|---------|------|--------------|
| STM0282 | 19.73 | STY1775  | 1697311 | 1697667 | rpIT | 50S riboso   |
| STM0685 | 55.06 | STY2670  | 2507478 | 2507987 | crr  | pts system   |
| STM3338 | 18.09 | STY1840  | 1757163 | 1758347 |      | putative me  |
| PSLT068 | 11.1  | STY1099  | 1078113 | 1078775 |      | putative se  |
| STM0732 | 7.22  | STY2987  | 2862970 | 2863725 | sprB | possible Ar  |
| STM1082 | 3.03  | STY2494  | 2324258 | 2326927 | yojN | putative tw  |
| STM0984 | 3.16  | STY2154  | 2000644 | 2002476 | uvrC | excinnuclea: |
| STM3577 | 4.87  |          |         |         |      |              |
| STM0793 | 18.29 | STY2490  | 2319432 | 2320082 | alkB | AlkB protei  |
|         |       | STY1797  | 1716955 | 1718310 | celF | phospho-br   |
| STM3859 | 11.86 |          |         |         |      |              |
| STM2435 | 38.73 |          |         |         |      |              |
|         |       | aSTY1672 |         |         |      |              |
| STM3582 | 57.11 | STY1587  | 1533109 | 1534143 |      | putative me  |
| STM1179 | 10.02 | STY4428  | 4298723 | 4299640 | malM | maltose op   |
| STM0060 | 5.63  | STY3952  | 3822350 | 3823390 | torT | Solute bind  |
| STM3677 | 26.14 | STY3975  | 3841982 | 3842344 | yidG | conserved    |
| STM4082 | 12.96 | STY0239  | 251181  | 251906  | rpsB | 30S riboso   |
| STM3286 | 5.83  | STY0404  | 415253  | 416227  | hemB | delta-amin   |
|         |       | STY0152  | 155774  | 157036  | ftsA | cell divisio |
| STM2847 | 36.26 | STY2557  | 2393402 | 2394064 | nuoB | NADH deh;    |
| STM2594 | 8.69  | STY1329  | 1287419 | 1288300 | trpH | conserved    |
| STM1106 | 8.37  | STY3941  | 3806532 | 3807632 | dnaN | DNA polym    |
| STM3826 | 12.23 | STY1728  | 1647071 | 1649833 | ssrA | putative tw  |
| STM2267 | 67    |          |         |         |      |              |
|         |       | aSTY1649 |         |         |      |              |
| STM3639 | 51.33 | STY0592  | 597283  | 597975  | fimC | fimbrial cha |
| STM2818 | 13.54 | STY3934  | 3797363 | 3798118 | yieE | conserved    |
| STM3338 | 22.8  | STY0387  | 393469  | 394722  |      | putative me  |
| STM2069 | 11.66 | STY2837  | 2699872 | 2700754 | yfiE |              |
| STM0647 | 6.79  | STY3393  | 3237661 | 3238305 |      | conserved    |
| STM1389 | 13.99 | STY4279  | 4149216 | 4150046 | glpG | putative me  |
| STM2086 | 31.91 |          |         |         |      |              |
| STM0031 | 13.33 |          |         |         |      |              |
| STM1010 | 47.29 |          |         |         |      |              |
| STM2179 | 12.82 | STY0637  | 637802  | 639046  | ybdA | hypothetica  |
| STM3523 | 29.88 | STY4737  | 4598488 | 4599243 | yjfQ | probable tr  |
| STM2536 | 30.47 | STY4816  | 4676536 | 4678047 |      | cytosol ami  |
| STM2381 | 8.38  | STY2843  | 2704746 | 2705426 |      | conserved    |
|         |       | STY3381  | 3224502 | 3225830 |      | conserved    |
| STM2970 | 30.83 | STY3426  | 3267539 | 3268869 | tdcC |              |
| STM2289 | 54.85 | STY3431  | 3274526 | 3275296 | garL | 5-keto-4-de  |
| STM1106 | 58.58 | STY2519  | 2353637 | 2354440 |      | putative 2,4 |
| STM0285 | 7.53  | STY2737  | 2573576 | 2574310 |      | conserved    |
| STM3178 | 13.97 | STY0530  | 536060  | 536665  | recR | recombinat   |
| STM0226 | 19.93 | STY0515  | 520263  | 520814  | maA  | maltose O-   |
| STM0588 | 16.34 |          |         |         |      |              |
| STM3342 | 7.84  | STY3874  | 3728319 | 3729728 | glnA | glutamine s  |
| STM0970 | 29.75 | STY0883  | 876118  | 877017  | ybiY | putative py  |
| STM2523 | 9.04  | STY0781  | 780693  | 781859  | sucC | succinyl-Cc  |
| STM4589 | 4.86  | STY3875  | 3730003 | 3731052 | glnL | Two-compr    |
| STM2355 | 70.5  | STY2584  | 2419511 | 2420293 | hisJ | histidine-bi |
| STM0840 | 10.01 | STY0138  | 139751  | 140755  | fruR | fructose re  |
| STM3045 | 42.79 | STY0732  | 733114  | 733644  | fldA | flavodoxin   |

|         |       |          |          |         |         |      |              |
|---------|-------|----------|----------|---------|---------|------|--------------|
| STM4342 | 21    | STY0778  |          | 775282  | 776001  | sdhB | succinate c  |
| STM0226 | 10.23 | STY0251  |          | 263877  | 264665  | lpxA | acyl-[acyl-c |
| STM3807 | 7.53  | STY2861  |          | 2731141 | 2731980 | trmD | tRNA(guan    |
|         |       | STY4718  |          | 4580924 | 4581232 | hfQ  | host factor- |
|         |       | STY1902  |          | 1796056 | 1797312 | hemA | glutamyl-tR  |
| STM1756 | 23.89 | STY2741  |          | 2577825 | 2578463 | purN | phosphorib   |
| STM1305 | 9.27  | STY0885  |          | 878044  | 879285  | moeA | molybdopte   |
| STM0482 | 9.31  |          |          |         |         |      |              |
| STM1064 | 14.29 | STY3809  |          | 3672144 | 3673160 | pfkA | 6-phosphol   |
| STM1952 | 22.49 | STY0709  |          | 704690  | 705430  | gltJ | glutamate/;  |
| STM0069 | 19.98 | STY4398  |          | 4256466 | 4257020 | yrdA | putative tra |
| STM0762 | 22.41 | STY1464  |          | 1414473 | 1414703 |      | conserved    |
| STM1007 | 99.6  | STY1013  |          | 1010373 | 1010618 |      | putative ba  |
| STM0006 | 21.12 | STY2253  |          | 2081209 | 2081700 | pduM | conserved    |
| STM3583 | 6.01  | STY4485  |          | 4372970 | 4373878 |      | putative me  |
| STM0160 | 24.12 | STY2157  |          | 2003593 | 2003817 | yecF | conserved    |
| STM0351 | 15.74 | aSTY4458 |          |         |         |      |              |
| STM2794 | 13.5  | STY3537  |          | 3378873 | 3379478 |      | possible tra |
| STM2255 | 12.11 | STY0010  |          | 10092   | 10805   |      | conserved    |
| STM1588 | 6.96  | STY0003  |          | 2801    | 3730    | thrB | homoserine   |
| STM3737 | 40.94 | STY1779a |          | 1702923 | 1703129 |      | hypothetica  |
| STM1392 | 39.68 | STY2078  |          | 1933756 | 1933872 |      | hypothetica  |
| STM3610 | 3.96  |          | STY3447  | 3290485 | 3292536 |      | possible ex  |
| STM2204 | 31.93 | STY2712  |          | 2545770 | 2546000 |      | hypothetica  |
| STM1034 | 30.39 |          |          |         |         |      |              |
| STM3883 | 13.68 | STY2421  |          | 2250297 | 2251370 | mgIC | galactoside  |
|         |       | STY0619  |          | 618821  | 620791  | apeE | outer mem    |
| STM0364 | 30.61 | STY0218  |          | 228147  | 230338  | fhuA |              |
| STM2353 | 16.26 |          | aSTY4459 |         |         |      |              |
| STM4223 | 13.5  | STY2555  |          | 2391010 | 2391510 | nuoE | NADH dehy    |
| STM1585 | 57.68 | STY3150  |          | 3021387 | 3021605 |      | possible lip |
| STM4495 | 9.56  | STY3575  |          | 3425869 | 3426483 | yigZ | conserved    |
| STM4281 | 21.15 | STY3599  |          | 3453744 | 3454364 | rhtB | homoserine   |
| STM0910 | 9.26  | STY3624  |          | 3477851 | 3479050 | hemY | Porphyrin t  |
|         |       | STY3735  |          | 3586968 | 3587672 | rplA | 50S riboso   |
| STM0493 | 5.28  | STY3634  |          | 3489950 | 3491212 | rffD | UDP-ManN     |
| STM0889 | 17.92 | STY3742  |          | 3593509 | 3594537 | murB | UDP-N-ace    |
| STM1415 | 41.69 | STY2180  |          | 2023515 | 2024885 | fliI | flagellum-s  |
| STM2206 | 42.29 | STY2667  |          | 2505403 | 2505660 | ptsH | phosphoca    |
|         |       | STY0121  |          | 123055  | 123900  | araC | arabinose (  |
| STM4285 | 6     | STY3081  |          | 2944316 | 2945614 | eno  | enolase      |
| STM0392 | 9.18  | STY3786  |          | 3652305 | 3653051 | fpr  | ferredoxin-  |
| STM3521 | 16.7  | STY2285  |          | 2111432 | 2112169 | hisA | phosphorib   |
| STM3239 | 5.34  | STY3629  |          | 3484927 | 3486177 |      | putative lip |
| STM0255 | 10.23 | STY3719  |          | 3568430 | 3569230 | yjaD | conserved    |
| STM1526 | 6.53  | STY0412  |          | 425056  | 426150  | ddlA | D-alanine:1  |
| STM0740 | 4.46  | STY2130  |          | 1982145 | 1984160 | cheA | chemotaxis   |
| STM3603 | 49.73 | STY1924  |          | 1816673 | 1818385 | treA |              |
|         |       |          | STY1440  | 1391326 | 1392426 |      |              |
| STM3772 | 8.32  | STY1406  |          | 1357108 | 1357671 |      | conserved    |
| STM0890 | 65.8  | STY0920  |          | 912359  | 913090  | artJ | arginine-bir |
| STM0063 | 51.27 | STY0668  |          | 667277  | 668173  | citG | CitG protei  |

|         |       |          |            |         |         |                |
|---------|-------|----------|------------|---------|---------|----------------|
|         |       | STY0992  | 987005     | 987781  | ycbC    | putative me    |
| STM3508 | 60.6  | STY4020  | 3881221    | 3882162 |         | conserved      |
| STM4108 | 44.4  | STY0646  | 647794     | 648882  | ybdH    | putative ox    |
| STM2222 | 28.13 | STY1331  | 1289029    | 1289904 |         | putative ps    |
| STM4037 | 75.8  |          | STY1492    | 1449249 | 1450391 | fdnG           |
| STM2323 | 6.53  | STY1951  | 1840118    | 1842028 |         | putative AT    |
| STM1703 | 3.77  | STY1980  | 1867456    | 1870095 |         | conserved      |
| STM1009 | 15.86 |          |            |         |         |                |
| PSLT110 | 15.09 | STY2105  | 1957586    | 1958185 | yebB    | conserved      |
| STM1688 | 32.54 | STY0526  | 532562     | 532939  | ybaN    | putative me    |
| STM2851 | 5.9   | STY0572  | 578601     | 579899  |         | putative pe    |
| STM4204 | 20.84 | STY0605  | 606760     | 608400  |         | putative me    |
| STM4526 | 20.86 | STY1490  | 1446547    | 1447125 |         | putative req   |
| STM2238 | 6.62  |          |            |         |         |                |
| STM2293 | 93.24 | aSTY2523 | STY2518    | 2353461 | 2353631 |                |
| STM3626 | 9.3   | STY2891  | 2770645    | 2774301 | iroC    | putative AE    |
| STM3301 | 5.58  | STY4144  | 4007030    | 4009099 | glyS    | glycine-tRN    |
| STM1185 | 15.95 |          | aSTY0793   |         |         |                |
| STM4111 | 100   |          |            |         |         |                |
|         |       | STY3352  | 3196819    | 3197685 |         | possible Ar    |
|         |       | STY3157  | 3029651    | 3030913 | lysA    | diaminopir     |
|         |       | STY3238  | 3103463    | 3104383 | speB    | agmatine u     |
| STM0437 | 12.94 |          |            |         |         |                |
| STM3666 | 41.44 | STY2965  | 2843013    | 2843558 | hydN    | electron tra   |
| STM3274 | 32.34 | STY4159  | 4018925    | 4019365 | viaC    | putative ac    |
| STM0575 | 48.95 | STY4015  | 3877536    | 3878285 |         | putative PT    |
| STM2915 | 25.17 | STY3136  | 3011941    | 3012348 | ygdB    | conserved      |
| STM0339 | 13.04 | STY3178  | 3049366    | 3049965 |         | conserved      |
| STM0880 | 14.84 | STY3272  | 3131717    | 3132424 | yqgA    | putative me    |
|         |       | STY3316  | 3163703    | 3164191 | hybE    | hydrogenas     |
|         |       | STY4626  | 4492225    | 4493058 |         | putative ca    |
| STM1491 | 42.22 | STY2393  | 2223544    | 2224491 | yehX    | ABC transp     |
| STM1515 | 9.52  | STY1949  | 1838713    | 1839294 |         | putative lipi  |
| STM3842 | 13.71 | STY4370  | 4238803    | 4239342 | rplE    | 50S riboso     |
| STM2272 | 7.51  | STY4261  | 4125259    | 4126293 |         | puative phc    |
| STM4543 | 2.63  | STY3474  | 3319213    | 3321147 | ftsH    | cell divisio   |
| STM2842 | 8.16  | STY3387  | 3230314    | 3231327 |         | possible gly   |
| STM1381 | 58.19 | STY4263  | 4127315    | 4128076 |         | hypothetica    |
| STM0998 | 9.68  | STY3489  | 3331472    | 3332170 |         | possible ex    |
| STM0994 | 15.38 | STY4862  | 4725066    | 4725839 | uxuR    | uxu operon     |
| STM2817 | 3.75  | STY4682  | 4543876    | 4545579 | dsbD    | thiol:disulfic |
|         |       | STY0406  | 419711     | 420334  |         | conserved      |
| STM2323 | 17.29 | STY2372  | 2203122    | 2204126 |         | putative hy    |
| STM2316 | 32.61 | STY2957  | 2833969    | 2834328 | srlM    | glucitol ope   |
| STM0537 | 4.58  | STY2384  | 2215321    | 2217354 | metG    | methionyl-t    |
| STM3847 | 25.12 | STY2458  | 2288870    | 2290060 | bcr     | bicyclomyc     |
| STM1049 | 40.06 |          | STY2469; ; | 2301136 | 2301918 |                |
|         |       | STY2398  | 2231109    | 2232056 | pbpG    |                |
| STM0600 | 10.78 | STY0280  | 296922     | 297692  | yafE    | putative me    |
| STM0925 | 30.16 | STY1713  | 1636710    | 1636937 | ssaH    | putative pa    |
| STM4323 | 19.95 | STY0776  | 773155     | 773502  | sdhD    | succinate c    |
| STM0603 | 5.53  |          | STY0845    | 839704  | 839946  |                |

|         |       |         |         |         |         |      |              |
|---------|-------|---------|---------|---------|---------|------|--------------|
|         |       | STY2865 |         | 2734639 | 2735430 | corE | putative me  |
| STM2993 | 20.77 |         | STY3454 | 3295898 | 3296215 |      | conserved    |
|         |       | STY3407 |         | 3253356 | 3253739 |      | putative ex  |
| STM1744 | 48.72 | STY0890 |         | 884861  | 885772  | yliD | hypothetica  |
| STM4279 | 37.06 | STY1736 |         | 1655478 | 1656230 | ttrB | tetrathional |
| STM2107 | 5.63  | STY3413 |         | 3256004 | 3256990 |      | conserved    |
| STM4040 | 20.97 | STY3328 |         | 3173337 | 3173747 |      | hypothetica  |
| STM0694 | 39.54 |         | STY3201 | 3067956 | 3068477 | fldB | flavodoxin   |
| STM1347 | 60.08 | STY0801 |         | 797808  | 798860  | aroG | phospho-2-   |
| STM3577 | 7.93  | STY1222 |         | 1175743 | 1177404 | flgK | flagellar ho |
| STM4247 | 16.86 | STY2124 |         | 1976588 | 1977232 | cheZ | chemotaxis   |
| STM1597 | 36.91 | STY3298 |         | 3144822 | 3146306 |      | possible alk |
| STM2364 | 48.15 | STY1149 |         | 1110244 | 1110606 | scsA | membrane     |
|         |       | STY0795 |         | 791985  | 792509  | pal  | peptidoglyc  |
| STM4429 | 25.82 | STY0829 |         | 826944  | 827699  | bioC | biotin synth |
| STM1366 | 60.02 | STY0643 |         | 644797  | 645210  | ybdB | conserved    |
|         |       | STY2783 |         | 2641676 | 2641876 | yfhJ | conserved    |
| STM3391 | 63.89 | STY2719 |         | 2553752 | 2556865 | acrD | putative eff |
| STM0152 | 39.57 | STY2947 |         | 2823850 | 2824035 | csrA | carbon stor  |
| STM2598 | 58.77 |         |         |         |         |      |              |
| STM1324 | 22.55 |         |         |         |         |      |              |
| STM2513 | 23.4  | STY4051 |         | 3914247 | 3914522 | rpoZ | DNA-direct   |
| STM2039 | 10.08 | STY4110 |         | 3969546 | 3970694 | mtlD | mannitol-1-  |
| STM4235 | 24.66 | STY4448 |         | 4317425 | 4317763 |      | hypothetica  |
|         |       |         |         |         |         |      |              |
| STM3799 | 17.49 | STY2367 |         | 2198696 | 2199031 |      | putative me  |
| STM0551 | 17.34 |         |         |         |         |      |              |
|         |       | STY4179 |         | 4038997 | 4039200 |      | conserved    |
| STM4538 | 7.92  | STY0297 |         | 312119  | 312661  |      | conserved    |
| STM0596 | 14.72 |         |         |         |         |      |              |
| STM0646 | 10    | STY0611 |         | 610886  | 611740  | ykgD | hypothetica  |
| STM4482 | 21.93 |         |         |         |         |      |              |
| STM3349 | 19.27 | STY1497 |         | 1454503 | 1454934 | osmC | osmotically  |
| STM2458 | 22.14 | STY0053 |         | 52646   | 52861   |      | conserved    |
| STM2833 | 8.73  |         |         |         |         |      |              |
|         |       | STY3958 |         | 3828729 | 3830129 | yhjA | probable cy  |
| STM3639 | 13.35 |         |         |         |         |      |              |
|         |       | STY2788 |         | 2645152 | 2645538 | nifU | NifU-like pr |
| STM0310 | 22.18 | STY3449 |         | 3292911 | 3293501 |      | probable pl  |
| STM1383 | 35.25 |         |         |         |         |      |              |
| STM0865 | 13.11 | STY0908 |         | 900974  | 901876  | rimK | ribosomal p  |
| STM1996 | 54.64 | STY0940 |         | 933501  | 933722  | cspD | cold shock   |
| STM0894 | 44.04 | STY1012 |         | 1010084 | 1010332 | xis  | excisionase  |
|         |       | STY0839 |         | 837202  | 837453  | moaD | molybdopte   |
| STM2867 | 27.21 |         |         |         |         |      |              |
| PSLT022 | 66.52 |         |         |         |         |      |              |
| STM3488 | 11.91 |         |         |         |         |      |              |
| STM4412 | 28.13 |         |         |         |         |      |              |
| STM3639 | 35.34 |         |         |         |         |      |              |
| STM2240 | 9.25  |         |         |         |         |      |              |
| STM4131 | 38.86 |         |         |         |         |      |              |

|         |       |          |
|---------|-------|----------|
| STM0891 | 39.6  | aSTY2159 |
| STM0621 | 68.18 | aSTY0070 |
| STM3348 | 29.42 | aSTY0231 |
| STM2657 | 89.82 |          |
| STM0452 | 17.82 |          |
| STM3077 | 61.13 | aSTY0979 |
| STM0910 | 60.08 |          |
| STM0912 | 45    |          |
| STM2595 | 53.86 |          |

|         |       |                   |         |         |                  |
|---------|-------|-------------------|---------|---------|------------------|
| STM1821 | 9.15  | STY3343           | 3186507 | 3187928 | putative ex      |
| STM0193 | 13.61 | STY3662           | 3517867 | 3518376 | regulatory p     |
| STM2761 | 5.43  | STY2629           | 2462589 | 2464511 | putative lipi    |
|         |       | STY3844           | 3703089 | 3703463 | hypothetica      |
|         |       | STY1359           | 1319944 | 1320117 | hypothetica      |
| STM3295 | 11.83 | STY1597           | 1541022 | 1541450 | hypothetica      |
| STM1959 | 54.15 | STY2167           | 2011173 | 2012693 | fliC flagellin   |
| STM4261 | 7.16  | STY2358           | 2192559 | 2193059 | conserved        |
|         |       | aSTY2887 aSTY3697 |         |         |                  |
| STM1289 | 10.81 | STY4039           | 3898639 | 3899235 | hypothetica      |
|         |       | STY1591           | 1538899 | 1539288 | putative ba      |
|         |       | STY1608           | 1547496 | 1547846 | hypothetica      |
| STM0339 | 40.59 | STY2362           | 2194958 | 2195056 | hypothetica      |
| STM3789 | 20.12 | STY2880           | 2760475 | 2760663 | hypothetica      |
|         |       | STY3068           | 2929304 | 2930368 | hypothetica      |
| STM0988 | 12.86 | STY0301           | 314619  | 315044  | hypothetica      |
| STM2141 | 1.49  | STY0347           | 353209  | 355896  | tsaC outer mem   |
| STM4551 | 5.98  | STY1015           | 1011496 | 1012560 | putative ba      |
| STM3042 | 21.17 | STY3763           | 3625958 | 3627064 | alanine rac      |
| STM0322 | 16.75 | STY4107           | 3968090 | 3968452 | yibL conserved   |
| STM0665 | 43.65 | aSTY4338          |         |         |                  |
| STM0786 | 4.7   | STY4530           | 4418728 | 4420722 | topB topoisomer  |
|         |       | STY4564           | 4445185 | 4445457 | hypothetica      |
| STM0376 | 13.43 | STY4582           | 4458746 | 4459150 | possible ex      |
| STM3079 | 10.84 | STY4706           | 4565301 | 4565678 | yjeN conserved   |
|         |       | STY4586           | 4463285 | 4464205 | hypothetica      |
| STM1749 | 8.14  | STY4162           | 4021016 | 4022647 | yhjW putative m  |
| STM2068 | 6.68  | STY4415           | 4281562 | 4283040 | putative m       |
| STM0547 | 13    | STY4540           | 4425115 | 4425534 | pilM putative ex |
| STM2633 | 9.26  | STY4755           | 4612132 | 4613271 | putative ex      |



| CT18_GEN STRAND | BEST_HIT.%ID | 2ND_BEST.%ID   | BEST_HIT.%ID   | 2ND_BEST      |
|-----------------|--------------|----------------|----------------|---------------|
| ATGGCAG -       | STY2176      | 99 STY3943     | 64.706 STY2176 | 97.1 STY3943  |
| ATGTCAT -       | STY3349      | 100 STY4594    | 65.347 STY3349 | 99.4 STY0190  |
| ATGACCG -       | STY2224      | 100 STY0753    | 61.765 STY2224 | 99.6 STY0753  |
| ATGGATA +       | STY0101      | 100 STY0536    | 88 STY0101     | 98.4 STY0536  |
| ATGCGTA +       | STY0163      | 100 STY2752    | 63 STY0163     | 98.5 STY2752  |
| ATGAGTG +       | STY0148      | 100 STY2478    | 61.607 STY0148 | 99 STY2478    |
| ATGAACA +       | STY0183      | 100 STY0702    | 75 STY0183     | 99.3 STY0702  |
| ATGACGA -       | STY0208      | 100 STY1226    | 62.136 STY0208 | 93 STY1226    |
| ATGGCTA -       | STY0238      | 100 STY2553    | 62 STY0238     | 98.9 STY2553  |
| ATGATTA -       | STY0274      | 100 STY0866    | 72 STY0274     | 96.9 STY0559  |
| GTGCAA +        | STY1531      | 100 STY4048    | 63.366 STY1531 | 81.86 STY4048 |
| ATGAATA +       | STY0723      | 100 STY1242    | 74 STY0723     | 99.1 STY1242  |
| ATGAAAA +       | STY0751      | 100            | STY0751        | 99.5          |
| ATGCTAA +       | STY4796      | 100 STY4023    | 78 STY4796     | 98.2 STY4023  |
| ATGAGCG -       | STY2237      | 100 STY0629    | 63.366 STY2237 | 98.6 STY4473  |
| ATGGAAT -       | STY2206      | 100 STY4598    | 70.588 STY2206 | 98.6 HCM1.252 |
| ATGACAC -       | STY1010      | 100 STY4048    | 59.804 STY1010 | 99.4 STY4048  |
| ATGGATT -       | STY3938      | 100 STY3553    | 62.376 STY3938 | 99.3 STY3553  |
| ATGCAAC +       | STY3911      | 100 STY2180    | 61.165 STY3911 | 99.5 STY2180  |
| ATGGGCA +       | STY0059      | 100 STY4845    | 46 STY0059     | 96.91 STY4845 |
| ATGAAAT -       | STY0113      | 100 STY1429    | 61 STY0113     | 62.02 STY1429 |
| ATGCAGA +       | STY3514      | 100 STY0573    | 74.286 STY3514 | 98.7 STY0573  |
| ATGACGG -       | STY3550      | 100 STY1226    | 76 STY3550     | 99.4 STY1226  |
| ATGCAAG -       | STY1130      | 100 STY3983    | 61.386 STY1130 | 98.1 STY4816  |
| ATGGGG +        | STY1167      | 100 STY4405    | 60.396 STY1167 | 98.6 STY4405  |
| ATGAAAT +       | STY1206      | 100 STY3747    | 63.725 STY1206 | 99.4 STY0176  |
| ATGCTAA -       | STY4286      | 100 STY3993    | 76 STY4286     | 98.5 STY0289  |
|                 | STY4724      | 53             | STY4724        | 5.85          |
| ATGGCAA +       | STY4240      | 100 STY3779    | 66 STY4240     | 99.5 STY0793  |
|                 | STY4155      | 59             | STY4155        | 16.23         |
| ATGTTGA -       | STY4281      | 100 STY1011    | 62.264 STY4281 | 98.7 STY1078  |
| ATGAATG +       | STY4276      | 100 STY4282    | 76 STY4276     | 98.86 STY4282 |
| ATGATGT -       | STY4238      | 100 STY2073    | 86 STY4238     | 98.5 STY3149  |
| GTGTTTC +       | STY4919      | 100            | STY4919        | 98.3          |
| TTGATGA +       | STY4628      | 98 STY3674     | 95 STY4628     | 82.29 STY3674 |
| ATGTCAT +       | STY4255      | 100 STY4424    | 60.194 STY4255 | 98.9 STY4424  |
| ATGCTGC +       | STY4900      | 100 STY3155    | 62.376 STY4900 | 99.6 STY2495  |
| ATGCAGC +       | STY4935      | 100 STY2344    | 71 STY4935     | 98.3 STY2344  |
| ATGAGTT +       | STY4644      | 100 STY3660    | 69 STY4644     | 99.5 STY3660  |
|                 | STY4742      | 65.686 STY0308 | 63.303 STY4121 | 31.45 STY4742 |

|            |          |        |          |        |          |       |          |
|------------|----------|--------|----------|--------|----------|-------|----------|
| ATGTATG +  | STY2893  | 100    | STY4816  | 60.784 | STY2893  | 96.02 | STY0154  |
| ATGCCGC +  | STY3766  | 100    | STY3474  | 64.762 | STY3766  | 98.4  | STY3474  |
| ATGCAAC +  | STY2980  | 100    | STY2950  | 60.396 | STY2980  | 99.4  | STY2950  |
| ATGCGCA -  | STY3052  | 100    | STY0746  | 60.952 | STY3052  | 99.2  | STY0746  |
| ATGCAGT +  | STY0915  | 100    | STY3095  | 63.551 | STY0915  | 96.92 | STY3095  |
|            | STY2981  | 60     | STY2304  | 59.434 | STY2304  | 27.56 | STY0796  |
| ATGTTCAI - | STY2727  | 100    | STY2401  | 67.961 | STY2727  | 99    | STY3448  |
|            | HCM2.012 | 62.264 |          |        | HCM2.012 | 10.4  |          |
|            | STY2717  | 100    | STY3511  | 82     | STY2717  | 53.5  | STY3511  |
|            | STY0951  | 73     | STY3127  | 61.386 | STY0951  | 19.01 | STY3127  |
| ATGAAGA +  | STY0984  | 100    | STY1185  | 70     | STY0984  | 99.1  | STY1185  |
| ATGGCAA -  | STY3793  | 100    | STY4647  | 64     | STY3793  | 99.4  | STY4250  |
| ATGAACG +  | STY3754  | 100    | STY3198  | 61.165 | STY3754  | 98.6  | STY3198  |
| ATGCGTT +  | STY4511  | 100    | STY4846  | 64.356 | STY4511  | 99.2  | STY4846  |
| ATGACCG +  | STY0910  | 100    | STY1262  | 65.686 | STY0910  | 99.03 | STY1262  |
|            | STY3624  | 64.356 | STY3638  | 62.376 | STY0699  | 6.22  | STY3624  |
| ATGCATA -  | STY2768  | 100    | STY0781  | 63     | STY2768  | 98.4  | STY3758  |
| ATGAAGC -  | STY2799  | 100    |          |        | STY2799  | 94.47 |          |
| GTGAGCA +  | STY0960  | 100    | STY2160  | 58.654 | STY0960  | 99.2  | STY2160  |
| ATGAATA +  | STY2821  | 100    | STY2655  | 64.356 | STY2821  | 97.99 | STY2655  |
| ATGCAGC -  | STY2200  | 100    | HCM1.187 | 76     | STY2200  | 99.3  | HCM1.187 |
| ATGAACA +  | STY2495  | 100    | STY4901  | 59     | STY2495  | 99.1  | STY4901  |
| ATGGCGC -  | STY4870  | 100    | STY3721  | 60.377 | STY4870  | 98.5  | STY3721  |
| ATGTGCC +  | STY1142  | 100    | STY2734  | 85     | STY1142  | 98.8  | STY2734  |
| ATGGTGC -  | STY2576  | 100    | STY0723  | 54.369 | STY2576  | 98.9  | STY0723  |
| GTGAATT -  | STY2164  | 100    | STY2474  | 72     | STY2164  | 100   | STY3039  |
|            | STY3084  | 67     | STY0962  | 65     | STY3084  | 18.35 | STY0962  |
| ATGTCGC -  | STY1204  | 100    | STY3344  | 72.381 | STY1204  | 99    | STY3344  |
| ATGGTTG +  | STY1755  | 100    | STY1791  | 72     | STY1755  | 98.1  | STY1791  |
| ATGCTAC +  | STY4732  | 100    | STY3366  | 69     | STY4732  | 98.5  | STY3366  |
| ATGAGTC +  | STY2984  | 100    | STY0938  | 65.094 | STY2984  | 98.3  | STY3498  |
| ATGAAAC +  | STY1671  | 100    | STY0631  | 60     | STY1671  | 99.2  | STY3523  |
| ATGCAAA -  | STY2195  | 100    | STY3319  | 60.784 | STY2195  | 98.9  | STY3319  |
| ATGACCA -  | STY2277  | 100    | STY1743  | 64     | STY2277  | 98.7  | STY1743  |
|            | STY2518  | 100    | STY2523  | 100    | STY2523  | 99    | STY2518  |
| ATGAGTA -  | STY2558  | 100    | STY0122  | 52.941 | STY2558  | 99.3  | STY0122  |
| GTGAGAC +  | STY4779  | 100    | STY2554  | 63.303 | STY4779  | 99.7  | STY2634  |
|            | STY4821  | 57.547 |          |        | STY4821  | 42.21 |          |
| ATGATAA -  | STY4861  | 100    | STY2702  | 48.039 | STY4861  | 96.3  | STY2702  |
| GTGAAAA -  | STY2601  | 100    | STY3218  | 66     | STY2601  | 90.52 | STY4156  |
| ATGCTCT -  | STY1863  | 100    | STY0507  | 66.337 | STY1863  | 99.9  | STY0507  |
| ATGCGAA -  | STY1589  | 100    |          |        | STY1589  | 99    |          |
| GTGTCTG -  | STY0361  | 100    |          |        | STY0361  | 99    |          |
| ATGAAAG +  | STY0186  | 100    | HCM1.169 | 62.963 | STY0186  | 99.2  | STY3044  |
| ATGCAGC -  | STY0236  | 100    | STY2179  | 63.303 | STY0236  | 98.8  | STY2179  |
| ATGGCTG +  | STY0150  | 100    | HCM1.230 | 62.963 | STY0150  | 99.1  | HCM1.230 |
| ATGTCTC -  | STY1811  | 100    | STY4328  | 82     | STY1811  | 98.4  | STY4328  |
| ATGAAAT -  | STY1772  | 100    | STY3461  | 62.617 | STY1772  | 99.2  | STY3461  |
|            | STY0085  | 73.267 |          |        | STY0085  | 55.99 |          |
| ATGCAAC -  | STY2375  | 100    | STY4210  | 62     | STY2375  | 98.5  | STY1377  |
| TTGATGA +  | STY1651  | 100    | STY3355  | 64.706 | STY1651  | 98.6  | STY3813  |

|           |         |     |         |         |         |       |         |
|-----------|---------|-----|---------|---------|---------|-------|---------|
| ATGTTAA(- | STY1702 | 100 |         | STY1702 | 97.5    |       |         |
| ATGTCAT(+ | STY3915 | 100 | STY2548 | 60.952  | STY3915 | 98    | STY2548 |
| ATGAGCT(+ | STY0304 | 100 | STY0208 | 61.765  | STY0304 | 99.3  | STY0208 |
| GTGATTA(+ | STY0242 | 100 | STY1282 | 58.416  | STY0242 | 99.1  | STY3349 |
| ATGTCAA(+ | STY2190 | 100 | STY1711 | 61.321  | STY2190 | 98.9  | STY1711 |
| ATGGCTG(- | STY2642 | 100 | STY2282 | 66      | STY2642 | 98.6  | STY1258 |
| ATGTTAT(- | STY2547 | 100 | STY2548 | 67      | STY2547 | 97.6  | STY2548 |
| ATGTCCA(- | STY1761 | 100 | STY4703 | 63.725  | STY1761 | 98.86 | STY4703 |
| ATGATTC(- | STY2992 | 100 | STY1711 | 56.075  | STY2992 | 99.5  | STY1711 |
| ATGCTTG(- | STY2680 | 100 | STY1263 | 64.078  | STY2680 | 97.2  | STY2679 |
| ATGAACG(+ | STY0549 | 100 | STY4168 | 63.636  | STY0549 | 99.4  | STY1517 |
| ATGAAAA(- | STY3878 | 100 | STY4157 | 64      | STY3878 | 99.8  | STY2841 |
| TTGTTAA(- | STY4708 | 100 | STY4868 | 59.804  | STY4708 | 98.9  | STY4868 |
|           | STY3132 | 65  | STY2291 | 64.356  | STY4421 | 15.89 | STY2291 |
| ATGAAGC(- | STY3362 | 100 | STY1655 | 75      | STY3362 | 99.5  | STY1655 |
| ATGATAG(+ | STY4256 | 100 | STY4255 | 87      | STY4256 | 97.6  | STY4424 |
| TTGCATA(+ | STY3470 | 100 | STY2093 | 66.667  | STY3470 | 96.3  | STY2093 |
| ATGATTG(+ | STY2579 | 100 | STY3311 | 63.725  | STY2579 | 99.2  | STY3311 |
| GTGGATG(+ | STY0560 | 100 | STY4172 | 66.667  | STY0560 | 99.8  | STY0273 |
| ATGCCCC(- | STY4752 | 100 | STY0958 | 64      | STY4752 | 98.6  | STY0958 |
| ATGAGGA(- | STY4819 | 100 | STY4268 | 67      | STY4819 | 98.9  | STY4268 |
| ATGGGGC(+ | STY2913 | 100 | STY1481 | 85      | STY2913 | 98.8  | STY1481 |
| ATGGATG(- | STY4867 | 100 | STY2168 | 52.941  | STY4867 | 99.2  | STY2168 |
| ATGAAAC(- | STY4943 | 100 | STY0592 | 63.462  | STY4943 | 98.4  | STY0592 |
| ATGATAA(+ | STY4142 | 99  |         |         | STY4142 | 98.3  |         |

|           |          |     |         |        |          |       |         |
|-----------|----------|-----|---------|--------|----------|-------|---------|
| ATGAGCA(- | STY3760  | 100 | STY2413 | 62.745 | STY3760  | 99.1  | STY2413 |
| ATGATGA(+ | STY1954  | 100 | STY0026 | 76.699 | STY1954  | 98.9  | STY0026 |
| ATGATTC(+ | STY0595  | 100 | STY0031 | 57.692 | STY0595  | 98.3  | STY0031 |
| ATGCTAA(- | STY3851  | 100 | STY3568 | 58.491 | STY3851  | 99    | STY3568 |
| GTGTTAC(- | STY0679  | 100 | STY4405 | 59     | STY0679  | 98.2  | STY4405 |
| GTGTCAG(- | STY4390  | 100 | STY4869 | 58.654 | STY4390  | 99.5  | STY4869 |
| ATGAAAC(+ | STY1880a | 99  | STY0388 | 92     | STY1880a | 97    | STY1408 |
| GTGATGC(- | STY3747  | 100 | STY1095 | 74     | STY3747  | 98.3  | STY1095 |
| ATGAAAC(- | STY0728  | 100 | STY4084 | 62.617 | STY0728  | 99.4  | STY4084 |
| ATGATAA(+ | STY0775  | 100 | STY0578 | 61.538 | STY0775  | 96.3  | STY4611 |
| ATGGCTC(+ | STY0977  | 100 | STY4787 | 62.136 | STY0977  | 98.9  | STY4787 |
| ATGCTGA(+ | STY0627  | 99  | STY0996 | 54.455 | STY0627  | 97.4  | STY0996 |
| ATGAGCC(- | STY4321  | 100 | STY1933 | 63.462 | STY4321  | 96    | STY1933 |
| ATGTATC(+ | STY3722  | 97  | STY2786 | 64.078 | STY3722  | 91.5  | STY2786 |
| ATGAAAC(+ | STY4248  | 100 | STY4244 | 86     | STY4248  | 98.9  | STY4244 |
|           | STY2895  | 97  | STY0663 | 83     | STY2895  | 55.86 | STY2762 |
| ATGTTGA(+ | STY1441  | 100 |         |        | STY1441  | 99    |         |
| ATGAGCA(- | STY1211  | 100 | STY0474 | 61.165 | STY1211  | 99.3  | STY0474 |
| ATGCAGC(+ | STY3556  | 100 | STY1957 | 62.617 | STY3556  | 99.5  | STY1957 |
| ATGGTTT(- | STY0040  | 100 | STY3765 | 77     | STY0040  | 99.5  | STY3765 |
| ATGCTCC(+ | STY0096  | 99  | STY4871 | 65.385 | STY0096  | 97.9  | STY3606 |
| TTGCTCC(- | STY1873  | 100 | STY2632 | 56.19  | STY1873  | 79.82 | STY2632 |
| ATGAAAT(+ | STY3857  | 100 |         |        | STY3857  | 97    |         |
| ATGACTA(- | STY0064  | 100 | STY3532 | 100    | STY0064  | 95    | STY3532 |
| ATGCGTA(+ | STY0026  | 100 | STY4941 | 78     | STY0026  | 98.4  | STY0593 |

|           |         |        |         |        |         |       |          |
|-----------|---------|--------|---------|--------|---------|-------|----------|
| ATGCGAT + | STY2248 | 100    | STY1349 | 89     | STY2248 | 98.5  | STY0471  |
| ATGTCGA - | STY4499 | 100    | STY1654 | 92     | STY4499 | 99    | STY1654  |
| GTGGCAC - | STY2138 | 100    | STY3132 | 75.728 | STY2138 | 87.97 | STY3132  |
| ATGCCAA + | STY2743 | 100    | STY3641 | 67.327 | STY2743 | 99.2  | STY3641  |
| ATGGCTG - | STY4461 | 100    | STY3578 | 59.223 | STY4461 | 99.5  | STY3578  |
| ATGCGTT + | STY2858 | 100    | STY2687 | 49.505 | STY2858 | 98.8  | STY2687  |
| ATGAAGG + | STY0071 | 100    | STY0669 | 63.366 | STY0071 | 99.3  | STY0669  |
| ATGAAAA - | STY3981 | 100    | STY3980 | 72     | STY3981 | 98.9  | STY4874  |
| ATGGTGG - | STY3589 | 100    | STY3528 | 73     | STY3589 | 99.2  | STY3528  |
| ATGCCTC + | STY3605 | 100    | STY2995 | 52.475 | STY3605 | 100   | STY2995  |
| ATGATCG - | STY2295 | 100    | STY2295 | 57.798 | STY2295 | 98    | STY2295  |
| ATGGATA + | STY2625 | 100    | STY4469 | 64.706 | STY2625 | 98.49 | STY4469  |
| ATGGCAT + | STY1946 | 100    | STY3922 | 60.396 | STY1946 | 100   | STY3922  |
| ATGACAA - | STY1315 | 100    |         |        | STY1315 | 99.5  |          |
| ATGTCAA - | STY3122 | 100    | STY3979 | 76.238 | STY3122 | 98.6  | STY3979  |
| ATGCAGA - | STY3039 | 100    | STY0142 | 65.714 | STY3039 | 98.8  | STY0237  |
| ATGAAAA + | STY3773 | 100    | STY1576 | 54     | STY3773 | 99.1  | STY1576  |
| ATGGATA - | STY0620 | 100    | STY3238 | 58.095 | STY0620 | 97.9  | STY3238  |
| ATGTCTG + | STY3779 | 100    | STY4240 | 68     | STY3779 | 99.2  | STY0491  |
| ATGTCCC + | STY2258 | 99     | STY1665 | 63     | STY2258 | 93.04 | STY1665  |
| ATGCGGC - | STY3602 | 100    | STY0205 | 52     | STY3602 | 99.7  | STY0205  |
| ATGAGTT - | STY3627 | 100    | STY3932 | 64.078 | STY3627 | 98.5  | STY3932  |
| TTGGTGA - | STY1858 | 100    |         |        | STY1858 | 98.9  |          |
| GTGAAAA - | STY3175 | 100    | STY3087 | 67.647 | STY3175 | 97    | STY3087  |
| ATGGCGC - | STY3102 | 100    |         |        | STY3102 | 98.2  |          |
| ATGAAAT(- | STY0469 | 100    | STY2701 | 63.462 | STY0469 | 99.3  | STY3642  |
| GTGTTTG - | STY3585 | 100    | STY0354 | 63.366 | STY3585 | 99.6  | STY2458  |
| ATGACGG + | STY0564 | 100    | STY4404 | 65.686 | STY0564 | 95.17 | STY4404  |
|           | STY4016 | 72     | STY1961 | 67.961 | STY1961 | 38.84 | STY4016  |
| ATGACAC + | STY0612 | 100    | STY4206 | 63.725 | STY0612 | 98.3  | HCM1.231 |
| ATGAATA + | STY0644 | 100    | STY4890 | 90     | STY0644 | 98.8  | STY4890  |
| ATGTTTG - | STY1450 | 100    | STY3443 | 71.154 | STY1450 | 98.8  | STY4000  |
| TTGATTG(- | STY1508 | 100    | STY2226 | 59     | STY1508 | 40.1  | STY2226  |
| ATGAAAA + | STY1466 | 100    | STY2926 | 71     | STY1466 | 99.3  | STY2674  |
| ATGTTAT(- | STY1438 | 100    | STY2162 | 58.824 | STY1438 | 97.8  | STY2162  |
| ATGGCTT - | STY1436 | 100    | STY2159 | 72     | STY1436 | 98.4  | STY0866  |
| ATGATAG - | STY2102 | 100    | STY4728 | 68.932 | STY2102 | 98.2  | STY4728  |
| ATGCATC - | STY0536 | 100    | STY0101 | 90     | STY0536 | 99    | STY0101  |
| ATGCTAA + | STY0676 | 100    |         |        | STY0676 | 98.6  |          |
| ATGAGCA + | STY4016 | 100    | STY1961 | 67     | STY4016 | 99.55 | STY1961  |
| ATGAGAA + | STY0647 | 100    | STY1807 | 64.356 | STY0647 | 98.4  | STY1807  |
| ATGATGC + | STY0640 | 100    | STY0081 | 58.416 | STY0640 | 98.6  | STY0081  |
| ATGAGCA + | STY4645 | 100    | STY3658 | 73     | STY4645 | 96.3  | STY3658  |
| ATGGCAC + | STY1301 | 100    |         |        | STY1301 | 99.5  |          |
| ATGACAA - | STY1470 | 100    |         |        | STY1470 | 98.7  |          |
| ATGACTG + | STY1428 | 100    | STY0214 | 71     | STY1428 | 99    | STY0214  |
| GTGCGTA + | STY1396 | 100    | STY2319 | 63.725 | STY1396 | 94.8  | HCM1.247 |
| GTGTGGC + | STY4746 | 100    | STY1914 | 87     | STY4746 | 99    | STY1914  |
| ATGCGTC - | STY2849 | 100    | STY0943 | 74     | STY2849 | 97.1  | STY0294  |
| ATGGGTC + | STY3169 | 100    | STY2269 | 73     | STY3169 | 96.8  | STY2269  |
| ATGTTTA + | STY0413 | 100    | STY0264 | 61.905 | STY0413 | 98.2  | STY0264  |
|           | STY0276 | 61.905 | STY4266 | 56.311 | STY0276 | 12.39 | STY4266  |

|           |          |        |         |        |          |       |         |
|-----------|----------|--------|---------|--------|----------|-------|---------|
| ATGTTAG + | STY0502  | 100    | STY0055 | 61.386 | STY0502  | 98.7  | STY0349 |
| ATGAATT + | STY3249  | 100    |         |        | STY3249  | 99.8  |         |
| ATGAACC - | STY4104  | 100    |         |        | STY4104  | 98.2  |         |
| ATGAGTG + | STY3971  | 100    | STY1329 | 65.049 | STY3971  | 98.4  | STY0149 |
| ATGACAA - | STY3131  | 100    |         |        | STY3131  | 98.5  |         |
| ATGAAAA - | STY3176  | 100    | STY3086 | 69     | STY3176  | 97.8  | STY3086 |
| ATGGTAC + | STY0440  | 100    | STY0653 | 70     | STY0440  | 98.7  | STY0653 |
| ATGATAA + | STY4192  | 100    | STY2336 | 64     | STY4192  | 97.9  | STY2336 |
| GTGGGAC + | STY4151  | 100    |         |        | STY4151  | 99.6  |         |
| ATGATTA + | STY4114  | 100    |         |        | STY4114  | 98.2  |         |
| ATGGATA + | STY4065  | 100    | STY4090 | 62.745 | STY4065  | 99.5  | STY4090 |
| ATGGCCA + | STY4014  | 100    | STY1959 | 62.376 | STY4014  | 99.6  | STY1959 |
| ATGATGA - | STY0745  | 100    | STY2803 | 61.321 | STY0745  | 98.6  | STY2803 |
| GTGAGCT + | STY4915  | 100    | STY1241 | 65.385 | STY4915  | 97.7  | STY1241 |
| ATGGATA + | STY2939  | 100    | STY0927 | 60.784 | STY2939  | 99.6  | STY0927 |
| ATGAAAG + | STY2343  | 100    | STY0744 | 69     | STY2343  | 98.1  | STY0744 |
| ATGATTG + | STY2452  | 100    | STY4155 | 62.264 | STY2452  | 99.2  | STY4155 |
| ATGAAAG - | STY2310  | 100    |         |        | STY2310  | 97.5  |         |
| ATGACGA - | STY2395  | 100    | STY0701 | 62.5   | STY2395  | 99.3  | STY1571 |
| ATGAGCA + | STY2431  | 100    | STY4925 | 76     | STY2431  | 99.7  | STY4925 |
|           | HCM1.252 | 62.136 |         |        | HCM1.252 | 18.1  |         |
| ATGACCA - | STY2407  | 100    | STY1134 | 64     | STY2407  | 98.6  | STY1134 |
| GTGGCGC - | STY0929  | 100    | STY0808 | 60.784 | STY0929  | 98.8  | STY0808 |
| ATGCAGC - | STY4160  | 100    |         |        | STY4160  | 98.5  |         |
| ATGAAAT - | STY4264  | 100    | STY1739 | 73     | STY4264  | 99.1  | STY1739 |
| ATGATTT - | STY4129  | 100    | STY1047 | 62.037 | STY4129  | 94.4  | STY2866 |
| ATGCGCA - | STY4231  | 100    | STY3033 | 64     | STY4231  | 98.6  | STY3033 |
| ATGGCAA - | STY3520  | 100    | STY1904 | 74     | STY3520  | 98.9  | STY1904 |
| ATGTTTG - | STY3418  | 100    | STY4470 | 61.765 | STY3418  | 98.6  | STY4470 |
| GTGATGC - | STY3312  | 100    | STY1897 | 65.094 | STY3312  | 98.6  | STY1656 |
| GTGAATC - | STY2974  | 100    | STY2270 | 74.757 | STY2974  | 99.5  | STY2270 |
| ATGCCAA + | STY3382  | 100    | STY1592 | 58.416 | STY3382  | 99.3  | STY1592 |
| ATGGAAG - | STY1719  | 100    | STY2698 | 62.857 | STY1719  | 97.3  | STY2572 |
| ATGAAAT + | STY1151  | 100    | STY1010 | 67     | STY1151  | 98.2  | STY0913 |
|           | STY3536  | 60.784 | STY4406 | 58     | STY3536  | 50.71 | STY4406 |
| ATGGGTC + | STY0876  | 100    | STY3457 | 49     | STY0876  | 98.7  | STY3457 |
| ATGGCGA - | STY1733  | 100    | STY3711 | 87     | STY1733  | 99.7  | STY3711 |
| ATGGCTG - | STY0804  | 100    | STY3510 | 63.107 | STY0804  | 99.3  | STY3510 |
| ATGAGTA - | STY0851  | 100    | STY4224 | 66.337 | STY0851  | 98.7  | STY4224 |
| ATGCGTC + | STY0894  | 100    | STY1386 | 63.208 | STY0894  | 71.23 | STY1386 |
| ATGAGTA + | STY3495  | 100    | STY0887 | 68.932 | STY3495  | 99.5  | STY0887 |
| ATGGCAC + | STY2181  | 100    | STY2442 | 62.037 | STY2181  | 100   | STY0891 |
| ATGGCAG + | STY3311  | 100    | STY2579 | 63.366 | STY3311  | 98.7  | STY2579 |
|           | STY3794  | 59.615 |         |        | STY3794  | 10.12 |         |
|           | STY0086  | 60.784 |         |        | STY0086  | 9.26  |         |
|           | STY2911  | 61.468 | STY3298 | 61     | STY2911  | 28.43 | STY4116 |
| ATGGAAC + | STY4780  | 100    |         |        | STY4780  | 99.2  |         |
| ATGAACG - | STY0475  | 100    |         |        | STY0475  | 98.37 |         |
|           | STY1513  | 62.136 | STY2297 | 60.577 | STY2297  | 41.56 | STY1911 |
| ATGTTCG + | STY0645  | 100    | STY4889 | 77     | STY0645  | 98.5  | STY4889 |
|           | STY0569  | 100    | STY4669 | 68     | STY0569  | 90.59 | STY4669 |
| GTGCCTA + | STY0603  | 98     | STY4035 | 90     | STY0603  | 71.22 | STY4035 |

|            |                       |        |                       |        |                       |       |                       |
|------------|-----------------------|--------|-----------------------|--------|-----------------------|-------|-----------------------|
| ATGACCA +  | STY0624               | 100    | STY4463               | 67.327 | STY0624               | 99.1  | STY1541               |
| ATGAAAC -  | STY0625               | 100    |                       |        | STY0625               | 99.2  |                       |
| ATGAGTA +  | STY1914               | 100    | STY1525               | 80     | STY1914               | 98.8  | STY1525               |
|            | STY2500               | 61.905 | STY0744               | 60.55  | STY2500               | 33.82 | STY0744               |
|            | STY0981               | 57     | STY0919               | 55.882 | STY0981               | 24.07 | STY0919               |
| ATGGGAC +  | STY2508               | 100    | STY0932               | 59     | STY2508               | 99.6  | STY0932               |
| ATGAATA -  | STY3323               | 100    | STY2509               | 32     | STY3323               | 99.2  | STY2509               |
| ATGAAAG +  | STY0918               | 100    | STY3067               | 56.863 | STY0918               | 99.7  | STY3067               |
| ATGTATA -  | STY0662               | 100    | STY0931               | 75     | STY0662               | 99.5  | STY1416               |
| ATGTCAG -  | STY4005               | 100    |                       |        | STY4005               | 99.2  |                       |
| ATGAAAG +  | STY4087               | 100    | STY1368               | 63.725 | STY4087               | 98.3  | STY1493               |
| ATGATTA(+  | STY4004               | 100    | STY4114               | 71.287 | STY4004               | 99.3  | STY4114               |
| ATGCGTA +  | STY3970               | 100    | STY3969               | 64.356 | STY3970               | 98.6  | STY3969               |
| GTGATGA -  | STY3968               | 100    | STY0190               | 57.143 | STY3968               | 99.1  | STY0190               |
|            | HCM2.012 <sub>1</sub> | 60.377 |                       |        | HCM2.012 <sub>2</sub> | 27.73 |                       |
|            | STY1156               | 71     | STY1548               | 60     | STY1156               | 65.74 | STY1548               |
| GCGCTGC -  | STY3800               | 99     | STY3807               | 80     | STY3800               | 98.5  | STY3807               |
| ATGGTTG -  | STY4878               | 100    | STY4712               | 53.465 | STY4878               | 98.6  | STY4712               |
|            | STY2610               | 49.505 | STY1078               | 32     | STY2610               | 42.76 | STY1078               |
| ATGTTCG +  | STY1657a              | 99     | STY1263               | 65.094 | STY1657a              | 97.03 | STY1263               |
| ATGAAAA -  | STY0860               | 100    | STY3542               | 67     | STY0860               | 100   | STY3542               |
| ATGGCAC +  | STY0700               | 100    | STY0736               | 61.386 | STY0700               | 99.4  | STY2548               |
| ATGAAGC +  | STY2142               | 100    | STY2316               | 47.573 | STY2142               | 99.1  | STY2316               |
| ATGCAGA +  | STY2580               | 100    |                       |        | STY2580               | 98.59 |                       |
|            | HCM1.168              | 61     | STY1643               | 60.784 | STY1643               | 39.47 | STY1366               |
|            | STY0445               | 62.264 | HCM2.005 <sub>1</sub> | 58.491 | STY0445               | 16.79 | HCM2.005 <sub>2</sub> |
|            | HCM1.93               | 53.704 |                       |        | HCM1.93               | 17.64 |                       |
|            | STY1260               | 63.107 | STY3306               | 60     | STY2603               | 20.84 | STY3306               |
|            | HCM1.142 <sub>1</sub> | 63     | STY2891               | 56.19  | HCM1.142 <sub>2</sub> | 24.39 | STY2891               |
|            | STY4371               | 63.303 | STY2329               | 47.17  | STY4371               | 43.55 | STY2329               |
|            | STY3353               | 67     |                       |        | STY3353               | 56.7  |                       |
|            | STY1948               | 63.725 | STY2248               | 57.426 | STY2248               | 2.69  | STY1948               |
|            | STY2248               | 71     | STY4200               | 63.725 | STY2248               | 58.27 | STY4200               |
| ATGCTAA -  | STY2523               | 100    | STY4757               | 64.815 | STY2523               | 99    | STY0637               |
|            | STY2584               | 100    | STY2585               | 77     | STY2584               | 99.4  | STY2585               |
|            | STY2657               | 100    | STY3268               | 72.277 | STY2657               | 98.9  | STY3268               |
|            | STY2711               | 100    | STY3236               | 87     | STY2711               | 98.8  | STY3236               |
|            | STY2719               | 100    | STY0519               | 88     | STY2719               | 99    | STY0519               |
|            | STY0076               | 100    | STY0464               | 65.347 | STY0076               | 100   | STY2554               |
| ATGAAAC +  | STY0307               | 100    |                       |        | STY0307               | 100   |                       |
| ATGACTG +  | STY0349               | 100    | STY0502               | 56     | STY0349               | 100   | STY0502               |
| ATGAGCA +  | STY1017               | 100    |                       |        | STY1017               | 100   |                       |
| ATGTTTA(+  | STY1044               | 100    | STYrarB               | 61.165 | STY1044               | 100   | STYrarB               |
| ATGGAAT +  | STY1060               | 100    | STY2027               | 90     | STY1060               | 100   | STY2027               |
|            | STY0328               | 100    | STY0323               | 84     | STY0328               | 100   | STY0323               |
| GTGTCAA +  | STY0793               | 100    | STY0492               | 65.094 | STY0793               | 100   | STY3777               |
|            | STY1032               | 100    | STY1200               | 66.337 | STY1032               | 100   | STY1200               |
| ATGTCCA +  | STY2006               | 100    |                       |        | STY2006               | 100   |                       |
| ATGCCGC -  | STY2029               | 100    | STY1058               | 86     | STY2029               | 100   | STY1058               |
| ATGCTGT -  | STY3191               | 100    | HCM1.90c              | 41     | STY3191               | 100   | HCM1.90c              |
| ATGGATT. + | STY0477               | 100    | STY0476               | 88     | STY0477               | 100   | STY0480               |

|           |         |        |         |        |         |       |         |
|-----------|---------|--------|---------|--------|---------|-------|---------|
| ATGGAAT + | STY1026 | 100    | STY4171 | 69.307 | STY1026 | 100   | STY4171 |
| ATGGCAC + | STY1048 | 100    | STY1049 | 100    | STY1048 | 100   | STY2039 |
| ATGTCAC + | STY1064 | 100    | STY2023 | 74     | STY1064 | 100   | STY2023 |
| GTGAAAA + | STY3089 | 100    | STY3088 | 63     | STY3089 | 100   | STY3088 |
| GTGATTG + | STY3288 | 100    | STY1648 | 59.615 | STY3288 | 100   | STY1648 |
| ATGCGAA + | STY1028 | 100    | STY1359 | 90.099 | STY1028 | 100   | STY1359 |
| ATGAAAT,+ | STY1050 | 100    | STY2037 | 100    | STY1050 | 100   | STY2037 |
| ATGAGTT + | STY1066 | 100    | STY2021 | 78     | STY1066 | 100   | STY2021 |
| TTGAGAA - | STY2042 | 100    | STY4209 | 62.745 | STY2042 | 100   | STY4209 |
| ATGAATA,+ | STY2058 | 100    | STY2350 | 59.223 | STY2058 | 100   | STY2350 |
| ATGCTAG - | STY3659 | 100    | HCM1.92 | 57.692 | STY3659 | 100   | HCM1.92 |
| ATGAAGA + | STY4838 | 100    | STY0593 | 68     | STY4838 | 100   | STY0336 |
|           | STY4615 | 100    | STY3687 | 88     | STY4615 | 100   | STY3687 |
| ATGAGCC + | STY4522 | 100    | STY4442 | 78.431 | STY4522 | 100   | STY4442 |
| ATGGAAC - | STY4669 | 100    | STY0569 | 70.874 | STY4669 | 100   | STY0569 |
| ATGATTG - | STY4822 | 100    |         |        | STY4822 | 100   |         |
| ATGGGTC + | STY4842 | 100    | STY1481 | 56     | STY4842 | 100   | STY1014 |
| ATGCAAA + | STY4570 | 100    | STY0473 | 64.356 | STY4570 | 100   | STY0473 |
| GTGGGAA + | STY4587 | 100    | STY4577 | 61.165 | STY4587 | 100   | STY4577 |
| GTGACAA + | STY4609 | 100    | STY1987 | 80     | STY4609 | 100   | STY1987 |
| ATGGATA + | STY4649 | 100    | STY4856 | 87     | STY4649 | 100   | STY4856 |
| ATGGAAA + | STY4666 | 100    |         |        | STY4666 | 100   |         |
| TTGACTG + | STY4571 | 100    | STY4417 | 58.654 | STY4571 | 100   | STY4417 |
| ATGAAAC + | STY3967 | 100    | STY4318 | 63.81  | STY3967 | 94.85 | STY4318 |
| ATGGCTA + | STY3947 | 100    | STY0817 | 68     | STY3947 | 92.24 | STY0817 |
| ATGAGTA + | STY3929 | 100    | STY0467 | 72     | STY3929 | 99    | STY2581 |
| ATGATTA(+ | STY3992 | 100    | STY2117 | 62.376 | STY3992 | 98.3  | STY2155 |
| ATGAAGC - | STY3481 | 100    | STY3351 | 52.475 | STY3481 | 100   | STY3351 |
| ATGTCGT - | STY3518 | 100    | STY1166 | 79     | STY1166 | 65.54 | STY3518 |
| ATGCTTG + | STY3497 | 100    | STY0156 | 64.151 | STY3497 | 92.77 | STY1206 |
| TTGACTT,- | STY3536 | 100    | STY2563 | 63.725 | STY3536 | 99.3  | STY2563 |
|           | STY0521 | 65.741 | STY1082 | 63     | STY0521 | 47.84 | STY0370 |
| ATGAAAA + | STY0702 | 100    | STY0183 | 76     | STY0702 | 99    | STY0183 |
| ATGTATG - | STY0721 | 100    | STY2732 | 64.706 | STY0721 | 99.1  | STY2117 |
|           | STY0746 | 100    | STY0544 | 73     | STY0746 | 57.77 | STY4235 |
| ATGATGT - | STY1543 | 100    | STY2198 | 68.868 | STY1543 | 99.1  | STY2198 |
|           | STY3920 | 75     | STY0593 | 71.287 | STY3920 | 23.93 | STY0336 |
| GTGGTTA - | STY3939 | 100    | STY4816 | 63.366 | STY3939 | 99.7  | STY0559 |
|           | STY3924 | 100    | STY3361 | 61.386 | STY3924 | 62.42 | STY3361 |
| ATGCGAT - | STY0011 | 100    | STY2194 | 53.922 | STY0011 | 98.8  | STY2194 |
| ATGAAAA - | STY1878 | 100    | STY0380 | 60     | STY1878 | 98    | STY0380 |
| ATGAGCG - | STY2833 | 100    | STY2760 | 62.037 | STY2833 | 99.7  | STY4443 |
| ATGAAAA - | STY3892 | 100    | STY4264 | 62.136 | STY3892 | 98.7  | STY1739 |
| ATGTGTG + | STY0078 | 100    | STY3083 | 60.396 | STY0078 | 98.51 | STY3083 |
| ATGAAAG + | STY0142 | 100    | STY1965 | 79     | STY0142 | 99.3  | STY1965 |
| ATGACGT - | STY0180 | 100    | STY0180 | 52     | STY0180 | 97.3  | STY0180 |
| ATGAAAG + | STY3566 | 100    |         |        | STY3566 | 99.5  |         |
| ATGATAA + | STY1573 | 100    | STY2393 | 77     | STY1573 | 99    | STY2393 |
| ATGCTGC + | STY4349 | 100    |         |        | STY4349 | 99.3  |         |
| ATGAAAT(+ | STY1240 | 100    | STY0528 | 64.356 | STY1240 | 98.7  | STY0321 |
| ATGGAAT - | STY1269 | 100    | STY4390 | 90     | STY1269 | 97.4  | STY4390 |
| ATGGGTA - | STY1846 | 100    | STY1925 | 69     | STY1846 | 98.8  | STY1925 |

|           |          |        |          |        |          |       |         |
|-----------|----------|--------|----------|--------|----------|-------|---------|
| ATGAGTT - | STY2314  | 100    | STY2341  | 59.615 | STY2314  | 98.8  | STY2341 |
| ATGAAGC + | STY4308  | 100    | STY4307  | 85     | STY4308  | 98.6  | STY4307 |
| ATGTTCA - | STY1275  | 100    | STY0173  | 58.824 | STY1275  | 99.1  | STY0173 |
| ATGTTTC - | STY1842  | 99     |          |        | STY1842  | 98.4  |         |
| ATGATAA - | STY2317  | 100    | STY2293  | 72     | STY2317  | 98.5  | STY2293 |
| TTGTTCT + | STY2347  | 100    | STY0903  | 63.303 | STY2347  | 96.14 | STY0903 |
|           | STY4008  | 54.902 |          |        | STY4008  | 2.7   |         |
| ATGACTA + | STY1825  | 100    | STY2805  | 66.038 | STY1825  | 99.6  | STY3228 |
| ATGAGTA + | STY2336  | 100    | STY3568  | 67.308 | STY2336  | 99.1  | STY2194 |
| ATGAATA + | STY0008  | 100    | STY0837  | 70.297 | STY0008  | 92.7  | STY0837 |
| GTGAAAA + | STY0316  | 100    | STY0082  | 60.784 | STY0316  | 99.2  | STY2738 |
| ATGGGCA + | STY0359  | 100    |          |        | STY0359  | 98.4  |         |
|           | STY4320  | 64.423 |          |        | STY4320  | 9.73  |         |
|           | STY3076  | 66     | STY0882  | 60.748 | STY0882  | 13.6  | STY3076 |
| TTGCATA + | STY4479  | 100    | STY4480  | 99     | STY4479  | 76.42 | STY2475 |
|           | STY3066  | 69.307 | STY2836  | 61.765 | STY3066  | 33.87 | STY2836 |
| ATGTTCC + | STY2645  | 100    |          |        | STY2645  | 98.8  |         |
| ATGAAGA - | STY2685  | 100    | STY0958  | 62.037 | STY2685  | 98.9  | STY0958 |
|           | STY4369  | 60.194 | STY0658  | 49     | STY4369  | 16.81 | STY0658 |
|           | STY2045  | 70     | STY1716  | 59.091 | STY2045  | 49.82 | STY1716 |
|           | STY3124  | 63.551 |          |        | STY3124  | 10.52 |         |
| ATGAAAA - | STY2775  | 100    | STY4503  | 83     | STY2775  | 97    | STY4503 |
| ATGAATT - | STY2810  | 100    | STY1222  | 64.486 | STY2810  | 98.8  | STY4183 |
| ATGAGAA + | STY3848  | 100    | STY2807  | 47     | STY3848  | 99.3  | STY2807 |
|           | STY0606  | 81     | STY2627b | 74     | STY0606  | 71.26 | STY2528 |
| ATGCACG + | STY2976  | 100    | STY3315  | 65     | STY2976  | 100   | STY3315 |
| ATGGATC - | STY3060  | 100    | STY1428  | 70     | STY3060  | 99.1  | STY1428 |
|           | STY1011  | 81     | STY4776  | 60.194 | STY1011  | 62.9  | STY4776 |
| ATGAACC + | STY2710  | 100    | STY0007  | 84     | STY2710  | 98.6  | STY0007 |
| ATGGGCA - | STY0956  | 100    | STY0655  | 66.019 | STY0956  | 99.1  | STY0655 |
| ATGAGTT + | STY0990  | 100    | STY3570  | 63.725 | STY0990  | 99.5  | STY3570 |
| GTGATTT + | STY0975  | 100    | STY2205  | 55     | STY0975  | 98.7  | STY2205 |
|           | HCM2.005 | 58.095 | STY3429  | 55.34  | HCM2.005 | 21.8  | STY3429 |
| TTGCGCC + | STY4764  | 100    | STY2004  | 62.745 | STY4764  | 100   | STY3481 |
| ATGTTGA - | STY2512  | 100    | STY2432  | 79     | STY2512  | 97.6  | STY3995 |
| ATGAAAA - | STY2573  | 100    | STY0667  | 63.81  | STY2573  | 98.5  | STY3227 |
| GTGCTTA - | STY2132  | 100    |          |        | STY2132  | 99    |         |
| GTGGCG -  | STY2595  | 100    | STY2088  | 64.486 | STY2595  | 99.1  | STY2664 |
| ATGGCGT + | STY1259  | 100    | STY0840  | 63.366 | STY1259  | 99.4  | STY0840 |
| ATGTTTA(- | STY1696  | 100    |          |        | STY1696  | 98.1  |         |
| ATGCGGC - | STY1277  | 100    | STY4410  | 58.654 | STY1277  | 89.7  | STY0207 |
| ATGAACA + | STY0030  | 100    | STY3574  | 60.396 | STY0030  | 97.8  | STY4393 |
| ATGCTCT + | STY2193  | 100    | STY4712  | 51.961 | STY2193  | 99.3  | STY4712 |
| ATGGCCA + | STY1786  | 100    | STY1454  | 56.863 | STY1786  | 99.3  | STY1454 |
| ATGTCAC + | STY4725  | 100    | STY3461  | 60.377 | STY4725  | 99.2  | STY1350 |
| ATGATTG + | STY4759  | 100    | STY4301  | 65.714 | STY4759  | 98.4  | STY3479 |
|           | STY4269  | 69.307 | STY0571  | 67     | STY4269  | 47.91 | STY0734 |
| ATGAAAG + | STY4858  | 100    | STY4585  | 86     | STY4858  | 99.2  | STY4585 |
| ATGACGC + | STY2510  | 100    | STY3944  | 61     | STY2510  | 98.9  | STY3547 |
|           | STY4726  | 66.667 | STY3570  | 59.406 | STY3570  | 5.82  | STY0793 |
| ATGTTTA - | STY2572  | 100    | STY2799  | 65.714 | STY2572  | 99.1  | STY4739 |



|            |         |        |         |        |         |       |         |
|------------|---------|--------|---------|--------|---------|-------|---------|
| ATGATAA` - | STY2133 | 100    | STY4333 | 91     | STY2133 | 99.7  | STY4352 |
| ATGGCTC -  | STY4607 | 100    | STY2888 | 94     | STY4607 | 99.5  | STY2888 |
| ATGAACG -  | STY2703 | 100    | STY4655 | 63     | STY2703 | 98    | STY0145 |
| ATGGCAG -  | STY2847 | 100    | STY0727 | 65.094 | STY2847 | 99.5  | STY4194 |
| ATGACCA +  | STY0393 | 100    | STY0787 | 80     | STY0393 | 98.5  | STY0787 |
| ATGAGTA -  | STY2220 | 100    | STY1226 | 62.857 | STY2220 | 97.6  | STY1226 |
| ATGACAG -  | STY4416 | 100    | STY0002 | 65.385 | STY4416 | 99.6  | STY3768 |
| TTGATCC -  | STY2944 | 100    | STY4620 | 63.107 | STY2944 | 97.7  | STY4620 |
|            | STY0087 | 73     | STY3021 | 61     | STY0087 | 63.5  | STY3021 |
| ATGCGCC +  | STY2187 | 100    | STY1701 | 72     | STY2187 | 99.2  | STY1701 |
| ATGGAAA -  | STY2995 | 100    |         |        | STY2995 | 99.2  |         |
| ATGGCTA -  | STY2122 | 100    | STY3019 | 75     | STY2122 | 99    | STY3019 |
| GTGTCTC -  | STY2303 | 100    |         |        | STY2303 | 97    |         |
| ATGAAGA -  | STY3897 | 100    | STY2591 | 62.5   | STY3897 | 98.8  | STY2591 |
| ATGGCTG +  | STY0240 | 100    | STY0484 | 62.264 | STY0240 | 91.38 | STY0484 |
| ATGAAAA` + | STY0417 | 100    | STY3855 | 62     | STY0417 | 99.4  | STY3855 |
| ATGCTGA +  | STY4410 | 100    | STY2459 | 69     | STY4410 | 99.2  | STY2459 |
| ATGAAAA, - | STY0084 | 100    | STY4048 | 61.165 | STY0084 | 98.7  | STY4295 |
| ATGAATA, + | STY1804 | 100    | STY1219 | 61.905 | STY1804 | 97.7  | STY1219 |
|            | STY0746 | 65.714 | STY0721 | 55.34  | STY0746 | 4.68  | STY0721 |
| ATGATTG. + | STY1658 | 100    | STY2964 | 61.905 | STY1658 | 99.1  | STY2964 |
| ATGAGCA +  | STY1025 | 100    | STY2785 | 60.185 | STY1025 | 66.64 | STY0146 |
| TTGAGCC -  | STY4812 | 100    | STY1694 | 65.686 | STY4812 | 99.4  | STY3198 |
| ATGGCAG +  | STY0588 | 100    |         |        | STY0588 | 98    |         |
|            | STY3732 | 60     | STY3379 | 49     | STY3732 | 18.18 | STY3379 |
| ATGAACA -  | STY4916 | 100    | STY0968 | 64.706 | STY4916 | 99.2  | STY0631 |
| ATGTCAG +  | STY4094 | 100    | STY4429 | 56.604 | STY4094 | 99.1  | STY4429 |
| ATGAATG +  | STY4287 | 100    | STY4168 | 62.136 | STY4287 | 98.4  | STY1914 |
|            | STY1911 | 64.706 | STY2295 | 61.165 | STY2295 | 10.06 | STY1911 |
| ATGACAA` - | STY1899 | 100    | STY4476 | 59.804 | STY1899 | 99.7  | STY4476 |
| ATGCAAG -  | STY0561 | 100    | STY1549 | 60.909 | STY0561 | 99.1  | STY1549 |
|            | STY4721 | 41     |         |        | STY4721 | 10.35 |         |
|            | STY0084 | 63.107 | STY3992 | 60.377 | STY4620 | 17.23 | STY0084 |
| ATGATTA(-  | STY4758 | 100    |         |        | STY4758 | 98.6  |         |
|            | STY1115 | 83     | STY3193 | 50     | STY1115 | 67.42 | STY3193 |
| TTGGCTA -  | STY2848 | 100    | STY3480 | 61.321 | STY2848 | 98.9  | STY3480 |
| GTGATGC -  | STY3385 | 100    | STY4292 | 67     | STY3385 | 99.2  | STY4292 |
| ATGCAGC +  | STY4275 | 100    |         |        | STY4275 | 99.2  |         |
| ATGCTGT -  | STY4056 | 100    | STY1637 | 62.745 | STY4056 | 98.4  | STY0227 |
| ATGGCTA +  | STY2794 | 100    | STY1419 | 67.925 | STY2794 | 98.9  | STY4775 |
| ATGTTTA, + | STY1242 | 100    | STY0723 | 74     | STY1242 | 99    | STY0723 |
| TTGACTA, + | STY3880 | 100    | STY2309 | 61.905 | STY3880 | 99.7  | STY2309 |
| ATGAGTA -  | STY0870 | 100    | STY0189 | 54     | STY0870 | 99.8  | STY0189 |
| ATGGCTT +  | STY0836 | 100    | STY0458 | 63.208 | STY0836 | 95.81 | STY0458 |
| ATGACAC -  | STY1699 | 100    |         |        | STY1699 | 97.7  |         |
| ATGAAAA, - | STY2691 | 100    | STY1549 | 65.094 | STY2691 | 98.5  | STY4181 |
| ATGCAAA` - | STY3796 | 100    | STY3896 | 70     | STY3796 | 99.4  | STY3896 |
| TTGCAGG -  | STY0693 | 100    | STY4552 | 63     | STY0693 | 99.4  | STY4552 |
| ATGACCG -  | STY0288 | 100    | STY2112 | 64.078 | STY0288 | 98.4  | STY2112 |
| ATGAGCA +  | STY2282 | 100    | STY1948 | 65.741 | STY2282 | 98.9  | STY4133 |
| ATGGTGC -  | STY1355 | 100    | STY0219 | 71.569 | STY1355 | 97.9  | STY2934 |
| ATGTTCC +  | STY0418 | 100    | STY4904 | 67.961 | STY0418 | 98.7  | STY4904 |

|           |         |        |          |        |         |       |         |
|-----------|---------|--------|----------|--------|---------|-------|---------|
| ATGTCTG - | STY1940 | 99     | STY1771  | 59.804 | STY1940 | 99.3  | STY1771 |
|           | STY2345 | 98     |          |        | STY2345 | 72.45 |         |
| ATGTTCA(- | STY0715 | 100    | HCM2.002 | 70     | STY0715 | 99.31 | STY1162 |
| ATGTCAT - | STY4488 | 100    |          |        | STY4488 | 99.7  |         |
| ATGGCGA - | STY2116 | 100    | STY3954  | 46.154 | STY2116 | 98.9  | STY3954 |
| GTGGAAC + | STY4459 | 100    | STY4458  | 74     | STY4459 | 98    | STY4458 |
| ATGGATT + | STY4078 | 100    | STY4077  | 61     | STY4078 | 97.2  | STY4077 |
| GTGACTA - | STY1987 | 100    | STY4609  | 80     | STY1987 | 98.1  | STY4609 |
| ATGACCG - | STY3718 | 100    |          |        | STY3718 | 97.5  |         |
| ATGGCCG + | STY3912 | 100    | STY4562  | 54.902 | STY3912 | 99.7  | STY4562 |
| ATGAAAG - | STY2493 | 100    | STY1649  | 87     | STY2493 | 99.5  | STY1649 |
| ATGAAAT(- | STY0847 | 100    | STY1312  | 88     | STY0847 | 98.46 | STY1312 |
| ATGCATT(+ | STY0453 | 100    |          |        | STY0453 | 97.82 |         |
| ATGAGTT - | STY3816 | 100    | STY4876  | 70.297 | STY3816 | 98.2  | STY4876 |
| ATGAATA(- | STY2269 | 100    | STY0851  | 83     | STY2269 | 98.7  | STY0851 |
| ATGGGTA + | STY1371 | 100    | STY4779  | 60.577 | STY1371 | 99.4  | STY4779 |
| ATGAGTA - | STY2868 | 100    | STY2421  | 61.905 | STY2868 | 98.8  | STY2421 |
| ATGGCTC + | STY4375 | 100    | STY2153  | 54.206 | STY4375 | 100   | STY2153 |
| ATGCGTT + | STY4071 | 100    | STY2590  | 63.551 | STY4071 | 98.9  | STY2590 |
| GTGAAAA - | STY3573 | 100    | STY2596  | 62.963 | STY3573 | 99.1  | STY2596 |
| ATGAAGA - | STY2829 | 100    | STY4352  | 63     | STY2829 | 99.2  | STY4352 |
| ATGAAAA - | STY3613 | 100    | STY0006  | 54.808 | STY3613 | 100   | STY0006 |
| ATGAATC - | STY3638 | 100    | STY1517  | 60.784 | STY3638 | 99.1  | STY1517 |
| ATGAGTG + | STY2185 | 100    |          |        | STY2185 | 99.3  |         |
| ATGACCC - | STY1930 | 100    | STY4443  | 67.961 | STY1930 | 98.9  | STY4443 |
| ATGGCAG - | STY2616 | 100    | STY1069  | 61.765 | STY2616 | 98.3  | STY1069 |
| ATGAAAA - | STY2554 | 100    | STY3665  | 65.385 | STY2554 | 98.1  | STY0063 |
| ATGAAAC + | STY4061 | 100    | STY0646  | 78.431 | STY4061 | 99.2  | STY0646 |
| ATGGCTT - | STY4606 | 100    | STY2887  | 95     | STY4606 | 97.7  | STY2887 |
| ATGGGGA - | STY3013 | 100    | STY2187  | 71     | STY3013 | 99    | STY1701 |
| ATGACCA + | STY3827 | 100    | STY2499  | 59.804 | STY3827 | 98.2  | STY2499 |
| ATGGGTG - | STY3586 | 100    | STY0682  | 67     | STY3586 | 100   | STY0682 |
| ATGAGCC - | STY3351 | 100    | STY2499  | 76     | STY3351 | 98.3  | STY2499 |
| ATGGACC + | STY2650 | 100    | STY4046  | 56     | STY2650 | 98.5  | STY4046 |
| ATGAACG - | STY3656 | 100    | STY3986  | 74     | STY3656 | 98.9  | STY3986 |
| ATGTTAG - | STY0118 | 100    | STY4119  | 82     | STY0118 | 91.19 | STY4119 |
| ATGGCGC - | STY3058 | 100    | STY3059  | 74     | STY3058 | 89.44 | STY3759 |
| ATGAGAT + | STY3046 | 100    | STY2586  | 67.327 | STY3046 | 99.2  | STY2586 |
| ATGCGAT + | STY3870 | 100    | STY0476  | 79     | STY3870 | 98.5  | STY0476 |
| ATGAAGA + | STY0573 | 100    | STY3429  | 77     | STY0573 | 98.4  | STY2730 |
| ATGACAA + | STY0963 | 100    | STY1567  | 99     | STY0963 | 98.2  | STY1567 |
|           | STY0793 | 61.765 | STY1959  | 60.784 | STY1959 | 45.81 | STY1136 |
| ATGGCGC - | STY1434 | 100    |          |        | STY1434 | 99.3  |         |
| ATGGGTA + | STY1336 | 100    | STY1816  | 69.903 | STY1336 | 99.2  | STY1816 |
|           | STY3842 | 75     | STY0958  | 61.765 | STY3842 | 56.17 | STY3513 |
| TTGAATT(- | STY1947 | 100    | STY0997  | 62     | STY1947 | 99    | STY2961 |
| ATGAAAC - | STY1422 | 100    | STY1131  | 59.615 | STY1422 | 98.6  | STY4156 |
| ATGAAAA(+ | STY2002 | 100    |          |        | STY2002 | 97.45 |         |
| ATGACTA(+ | STY1390 | 100    | STY3901  | 61.765 | STY1390 | 98.3  | STY3901 |
| GTGATAG - | STY2103 | 100    | STY4063  | 70.588 | STY2103 | 98.2  | STY4063 |
| ATGTCTT(- | STY0582 | 100    | STY0642  | 61.682 | STY0582 | 94.9  | STY0642 |
| GTGGCTC - | STY0622 | 100    | STY4635  | 61.386 | STY0622 | 98.1  | STY4635 |

|            |          |        |         |                 |               |
|------------|----------|--------|---------|-----------------|---------------|
| ATGCAAG -  | STY1412  | 100    |         | STY1412         | 98.5          |
| ATGCCAT +  | STY1482  | 100    | STY4796 | 62 STY1482      | 94.8 STY4796  |
| TTGAAAG +  | STY0376  | 100    | STY2451 | 67 STY0376      | 99.5 STY1957  |
| ATGCAAA -  | STY1283  | 100    | STY2319 | 65.049 STY1283  | 99.2 STY2319  |
| TTGTACG -  | STY1458  | 100    | STY0237 | 64 STY1458      | 98.9 STY0237  |
|            | STY2011  | 91     | STY2077 | 77 STY2077      | 67.77 STY2011 |
| GTGTCGA -  | STY2106  | 100    | STY2964 | 64.706 STY2106  | 97.9 STY2964  |
| ATGGAAA -  | STY3977  | 100    | STY1793 | 58 STY3977      | 98.4 STY1793  |
| ATGTCAG -  | STY3127  | 100    | STY0414 | 75.248 STY3127  | 98.9 STY0414  |
|            | STY1073  | 77     | STY2013 | 77 STY1073      | 30.75 STY2013 |
|            | STY4862  | 63.551 | STY1934 | 54 STY4862      | 19.69 STY1934 |
| TTGAAAA -  | STY3303  | 100    | HCM1.74 | 60.577 STY3303  | 81.34 HCM1.74 |
| ATGAGCA +  | STY3640  | 100    | STY0855 | 71 STY3640      | 99.4 STY2836  |
| ATGCAGC +  | STY4137  | 100    | STY4257 | 69.307 STY4137  | 98.6 STY4257  |
| GTGTCGC +  | STY1226a | 100    | STY0562 | 60.185 STY1226a | 66.4 STY0562  |
| ATGTCTT(+) | STY3107  | 100    | STY3325 | 62.136 STY3107  | 98.4 STY3325  |
| GTGGTAT -  | STY2873  | 100    | STY1082 | 60.377 STY2873  | 99.2 STY1082  |
| ATGACAC -  | STY3209  | 100    | STY2182 | 65.385 STY3209  | 96.4 STY0931  |
| ATGGAGT -  | STY3259  | 100    | STY4203 | 72 STY3259      | 99.6 STY4203  |
| GTGCTGC -  | STY3743  | 100    | STY3744 | 74 STY3743      | 91.07 STY3744 |
| ATGAAAA -  | STY3264  | 100    | STY2546 | 62.617 STY3264  | 99.6 STY2546  |
| ATGTCTT -  | STY0667  | 100    | STY3340 | 62.745 STY0667  | 78.36 STY3340 |
| ATGCCAA +  | STY2447  | 100    | STY2446 | 95 STY2447      | 71.13 STY4694 |
| ATGACAG +  | STY2917  | 99     | STY3429 | 62.745 STY2917  | 98.3 STY3429  |
| ATGGCTG -  | STY1370  | 100    | STY3711 | 79 STY1370      | 97.7 STY3876  |
| ATGACTG +  | STY3195  | 100    | STY4742 | 60.194 STY3195  | 99.1 STY4742  |
| ATGGAGC +  | STY0397  | 100    |         | STY0397         | 99.8          |
| ATGAAAA +  | STY4148  | 100    | STY1428 | 87 STY4148      | 99.8 STY1428  |
| ATGACAG +  | STY2437  | 100    | STY2698 | 66 STY2437      | 98.9 STY2698  |
|            | STY2045  | 90     | STY3321 | 56.863 STY2045  | 57.25 STY3321 |
| ATGTACG -  | STY2389  | 100    | STY4736 | 66 STY2389      | 98.6 STY4736  |
| ATGGAAA +  | STY2428  | 100    | STY4405 | 79 STY2428      | 99.1 STY4405  |
| ATGAAGA -  | STY2318  | 100    |         | STY2318         | 98.9          |
| GTGAGTC -  | STY2394  | 100    | STY3555 | 63.366 STY2394  | 98.2 STY2392  |
| ATGATTA +  | STY4102  | 100    |         | STY4102         | 98.2          |
| ATGATTG +  | STY4358  | 100    | STY0247 | 58.252 STY4358  | 99.8 STY2467  |
| ATGATTT(+) | STY4715  | 100    | STY3129 | 64 STY4715      | 98.5 STY3129  |
| ATGTTAC(+) | STY4365  | 100    | STY0489 | 56 STY4365      | 100 STY0489   |
| TTGAGCG -  | STY3194  | 100    | STY3050 | 76 STY3194      | 99.11 STY3050 |
| ATGATAG +  | STY4736  | 100    | STY3556 | 66 STY4736      | 99.3 STY3556  |
| GTGATGA +  | STY4901  | 100    | STY2495 | 64 STY4901      | 91.4 STY2495  |
| ATGGCGC -  | STY4693  | 100    | STY1160 | 64.151 STY4693  | 99.3 STY1160  |
| ATGAAAA +  | STY2385  | 100    | STY2386 | 74 STY2385      | 100 STY2386   |
| ATGGCAT -  | STY0711  | 100    |         | STY0711         | 97.1          |
| ATGAAAA(+) | STY3245  | 100    | STY0646 | 62.857 STY3245  | 98.8 STY3725  |
| ATGGAAC +  | STY1097  | 100    | STY3608 | 66.337 STY1097  | 98.8 STY3132  |
| ATGGCGC +  | STY0814  | 100    | STY3594 | 63.462 STY0814  | 98.3 STY3594  |
| ATGACGC +  | STY0888  | 100    | STY4168 | 64 STY0888      | 99.2 STY3040  |
| ATGGTAC +  | STY3502  | 100    | STY3598 | 64.22 STY3502   | 99.2 STY3598  |
| GTGAATA -  | STY0819  | 100    | STY4530 | 64.706 STY0819  | 99.2 STY4530  |
| ATGTCCG +  | STY0863  | 100    |         | STY0863         | 98.3          |
| TTGATGA -  | STY3210  | 100    | STY0978 | 90 STY3210      | 99.5 STY0003  |

|           |          |        |          |        |         |       |          |
|-----------|----------|--------|----------|--------|---------|-------|----------|
| ATGCTTA - | STY0284  | 100    | HCM2.010 | 72     | STY0284 | 99.1  | HCM2.010 |
| TTGACGA + | STY3403  | 100    | STY2738  | 60.784 | STY3403 | 99.6  | STY2738  |
| ATGATGA - | STY1723  | 100    | HCM1.110 | 58     | STY1723 | 99.7  | STY1972  |
| ATGAATA - | STY0854  | 100    | STY1157  | 65     | STY0854 | 98.4  | STY0929  |
| ATGCAGA + | STY0899  | 100    | STY4874  | 70     | STY0899 | 99.1  | STY4874  |
| ATGAAAA + | STY0447  | 100    | STY1049  | 70.588 | STY0447 | 99.7  | STY1049  |
|           | STY2869  | 69     | STY1979  | 43.269 | STY2869 | 35.38 | STY1979  |
|           | STY4720  | 54     |          |        | STY4720 | 14.75 |          |
| ATGCCGA + | STY4886  | 100    | STY3560  | 54.455 | STY4886 | 99    | STY3560  |
| ATGATCT + | STY4518  | 100    | STY4668  | 94     | STY4518 | 99.6  | STY4668  |
|           | STY1634  | 76     | STY3750  | 61.386 | STY1634 | 62.7  | STY3750  |
| ATGATGA + | STY4418  | 100    |          |        | STY4418 | 100   |          |
|           | STY0108  | 50     |          |        | STY0108 | 18.07 |          |
| ATGATGA - | STY4399  | 100    |          |        | STY4399 | 98.9  |          |
| ATGCAGA - | STY2219  | 100    | STY4470  | 65.049 | STY2219 | 95.43 | STY4470  |
|           | STY4641  | 74     | STY4116  | 57.547 | STY4641 | 31.63 | STY4116  |
| ATGAGTA - | STY4643  | 100    | STY4511  | 61.386 | STY4643 | 98.8  | STY4511  |
| ATGTCTC - | STY3464  | 100    | STY3668  | 63.107 | STY3464 | 100   | STY3668  |
| ATGGATA - | STY3203  | 100    | STY1310  | 50     | STY3203 | 100   | STY1232  |
| ATGAAAC + | STY3442  | 100    | STY2962  | 64     | STY3442 | 99.3  | STY2962  |
| ATGAACC - | STY1474  | 100    | STY1491  | 62.857 | STY1474 | 98.7  | STY1491  |
| ATGACTA + | STY1529  | 100    |          |        | STY1529 | 98.8  |          |
| ATGGTGC + | STY1453  | 100    | STY0887  | 63.725 | STY1453 | 98.1  | STY0887  |
| ATGAAAA + | STY3572  | 100    | STY0724  | 60.377 | STY3572 | 99.5  | STY0724  |
| ATGACAT + | STY0088  | 98     | STY3560  | 55.446 | STY0088 | 97.2  | STY3560  |
| ATGATGA + | STY1563  | 100    | STY4184  | 59.804 | STY1563 | 98.7  | STY1319  |
| ATGAAAA - | STY2808  | 100    | STY0506  | 85     | STY2808 | 99.4  | STY0506  |
|           | STY0602a | 98     | STY4835  | 66     | STY4835 | 45.21 | STY0602a |
| ATGCAAA + | STY2689  | 100    | STY1832  | 71.845 | STY2689 | 99.1  | STY1832  |
|           | STY3340  | 61.765 | STY4563  | 59.048 | STY4563 | 28.46 | STY3340  |
| ATGACCG + | STY2736  | 100    | STY4651  | 64     | STY2736 | 98.3  | STY4285  |
| ATGCCGA - | STY2784  | 100    | STY0773  | 62.376 | STY2784 | 100   | STY0773  |
| ATGTATT + | STY0765  | 100    | HCM1.114 | 61.765 | STY0765 | 95    | HCM1.114 |
| ATGAAAA - | STY0687  | 100    | STY4715  | 51.961 | STY0687 | 99.2  | STY4715  |
| ATGGGCC + | STY2533  | 100    |          |        | STY2533 | 98.1  |          |
|           | STY0286  | 65.385 | STY1339  | 62.376 | STY3585 | 14.1  | HCM1.232 |
|           | STY1498  | 59.804 | STY0163  | 59.223 | STY1498 | 19.97 | STY4760  |
|           | STY3904  | 61.905 | STY1788  | 60.952 | STY1788 | 8.05  | STY3904  |
|           | STY4843  | 96     | STY4284  | 60.185 | STY4843 | 92.3  | STY4284  |
| ATGTTCA + | STY4846  | 98     | STY4511  | 63.366 | STY4846 | 95    | STY4511  |
|           | STY4842  | 93     | STY3773  | 50.962 | STY4842 | 86.4  | STY3773  |
|           | STY3183  | 74     |          |        | STY3183 | 70.18 |          |
|           | STY2422  | 48.039 | STY0565  | 42.453 | STY2422 | 35.03 | STY0565  |
|           | STY1673  | 31     |          |        | STY1673 | 15.66 |          |
|           | STY0544  | 74     | STY4796  | 65.094 | STY0544 | 52.1  | STY2849  |
|           | STY0520  | 100    | STY3569  | 73     | STY0520 | 98.8  | STY3569  |
|           | STY0544  | 100    | STY1838  | 63.393 | STY0544 | 98.9  | STY1838  |
|           | STY0569  | 100    | STY1678  | 62.037 | STY0569 | 98.4  | STY3378  |
|           | STY0606  | 99     | STY0760  | 60     | STY0606 | 97.4  | STY0760  |
|           | STY0644  | 100    | STY4890  | 90     | STY0644 | 98.6  | STY4890  |
| ATGTTCA - | STY1255  | 100    | STY1748  | 72.277 | STY1255 | 100   | STY1748  |

|           |         |        |          |        |         |      |          |
|-----------|---------|--------|----------|--------|---------|------|----------|
| ATGACAG - | STY1595 | 100    | STY3175  | 60.194 | STY1595 | 100  | STY3175  |
| ATGACAC + | STY1612 | 100    | STY1571  | 59.615 | STY1612 | 100  | STY1614  |
| ATGTCAC + | STY1628 | 100    | STY4603  | 42     | STY1628 | 100  | STY4603  |
| ATGCTTA + | STY1853 | 100    | STY1853  | 52.941 | STY1853 | 100  | STY1853  |
| ATGGCAG + | STY1068 | 100    | STY2019  | 89     | STY1068 | 100  | STY2019  |
| ATGATGC - | STY1606 | 100    | STY1606  | 28     | STY1606 | 100  | STY1606  |
| ATGACTA + | STY1622 | 100    | STY1622  | 64.762 | STY1622 | 100  | STY2586  |
| ATGCAAA + | STY1643 | 100    | STY2889  | 88     | STY1643 | 100  | STY2889  |
| GTGGATA + | STY1062 | 100    | STY2025  | 74     | STY1062 | 100  | STY2025  |
| GTGCGCA - | STY1049 | 100    | STY2038  | 100    | STY2038 | 100  | STY1049  |
| ATGAAGC - | STY2054 | 100    | STY2054A | 100    | STY2054 | 100  | STY2054A |
| ATGGCGA + | STY1616 | 100    |          |        | STY1616 | 100  |          |
| ATGGCTG + | STY1632 | 100    | STY4601  | 69     | STY1632 | 100  | STY4601  |
| ATGACTA - | STY1889 | 100    | STY0016  | 71     | STY1889 | 100  | STY0016  |
| ATGGCTA + | STY1072 | 100    | STY2014  | 100    | STY1072 | 100  | STY2014  |
| ATGACCA - | STY2048 | 100    | STY1153  | 54     | STY2048 | 100  | STY1153  |
| ATGAAAA - | STY2064 | 100    | STY2173  | 55.769 | STY2064 | 100  | STY2173  |
| ATGGCGC + | STY1635 | 100    | STY2680  | 58.824 | STY1635 | 100  | STY2680  |
| ATGTATA - | STY1891 | 100    | HCM1.107 | 59.633 | STY1891 | 100  | HCM1.107 |
| ATGGATT - | STY2025 | 100    | STY1062  | 74     | STY2025 | 100  | STY1062  |
| ATGGAAA + | STY3091 | 100    | STY4793  | 57     | STY3091 | 100  | HCM1.128 |
| ATGGAAA + | STY2066 | 100    | STY1020  | 61.165 | STY2066 | 100  | STY1020  |
| ATGAAGG - | STY2296 | 100    | STY2296  | 72     | STY2296 | 100  | STY2296  |
| ATGATGG + | STY4590 | 100    | STY0105  | 62.376 | STY4590 | 100  | STY0105  |
| ATGTCAC - | STY4629 | 100    | HCM1.268 | 61.165 | STY4629 | 100  | STY0322  |
| GTGGAAA - | STY4652 | 100    | STY2608  | 58     | STY4652 | 100  | STY2608  |
| ATGACGA + | STY4557 | 100    | STY4459  | 59.406 | STY4557 | 100  | STY4459  |
| ATGAGCC + | STY4574 | 100    |          |        | STY4574 | 100  |          |
| ATGAGCC + | STY4591 | 100    | STY3446  | 60     | STY4591 | 100  | STY3446  |
| ATGTTTC - | STY4826 | 100    | STY2402  | 62.136 | STY4826 | 100  | STY4600  |
| TTGAGTC + | STY4851 | 100    | STY1758  | 60.396 | STY4851 | 100  | STY1758  |
| ATGAAAA - | STY4625 | 100    | STY3677  | 98     | STY4625 | 100  | STY3677  |
| ATGAGAG + | STY4528 | 100    |          |        | STY4528 | 100  |          |
| ATGTCTC + | STY4552 | 100    | STY1011  | 68     | STY4552 | 100  | STY0693  |
| GTGGCCA - | STY4827 | 100    | STY3461  | 60.577 | STY4827 | 100  | STY3461  |
| ATGTTTG - | STY3197 | 100    | STY1901  | 79     | STY3197 | 98.6 | STY1901  |
| ATGAAGG - | STY2634 | 100    | STY1735  | 73     | STY2634 | 99.1 | STY1735  |
| ATGTCAG - | STY2234 | 100    | STY4319  | 67.961 | STY2234 | 98.7 | STY4775  |
| ATGAAAA - | STY4234 | 100    | STY2128  | 86     | STY4234 | 98.7 | STY4892  |
| GTGGCAC + | STY0143 | 100    |          |        | STY0143 | 98.9 |          |
| GTGCTAG + | STY0181 | 100    | STY4276  | 65.686 | STY0181 | 96.7 | STY4276  |
| ATGGCAA - | STY0170 | 100    | STY0647  | 60.748 | STY0170 | 98.2 | STY4253  |
|           | STY4283 | 61.538 |          |        | STY4283 | 9.09 |          |
| ATGCGTG + | STY0220 | 100    | STY3155  | 60.784 | STY0220 | 98.5 | STY3155  |
| ATGAACA + | STY0259 | 100    | STY2806  | 83     | STY0259 | 98.2 | STY2806  |
| ATGAGAT + | STY1547 | 100    | STY2951  | 66     | STY1547 | 99.4 | STY2951  |
|           | STY3918 | 61.538 | STY0589  | 60.396 | STY3918 | 36   | STY0024  |
| ATGAAAA + | STY0735 | 100    | STY3106  | 63     | STY0735 | 99.8 | STY1980  |
| GTGATCG + | STY2173 | 100    | STY0063  | 72     | STY2173 | 99.3 | STY0063  |
| ATGAAAA - | STY4084 | 100    | STY4083  | 60.396 | STY4084 | 97.6 | STY0200  |
| ATGAACG - | STY2228 | 100    |          |        | STY2228 | 99   |          |
| ATGCAAA - | STY1326 | 100    |          |        | STY1326 | 99.3 |          |

|            |          |        |           |                 |                |
|------------|----------|--------|-----------|-----------------|----------------|
| ATGAAAC +  | STY0093  | 100    |           | STY0093         | 98.06          |
| ATGGACA +  | STY3930  | 100    | STY3116   | 62.963 STY3930  | 98.8 STY2332   |
| ATGTCTA +  | STY0015  | 99     |           | STY0015         | 97.4           |
| ATGCAAG +  | STY3265  | 100    | STY0809   | 59.406 STY3265  | 98.9 STY0809   |
| ATGCTGT -  | STY3491  | 100    | STY3725   | 65.049 STY3491  | 99.9 STY3110   |
| ATGTTCA +  | STY3527  | 100    | HCM2.004: | 66 STY3527      | 99.8 HCM2.004: |
| ATGGGTC +  | STY0682  | 100    | STY3586   | 68 STY0682      | 99 STY3586     |
| GTGCGTA +  | STY1189  | 100    | STY4932   | 64.22 STY1189   | 100 STY4932    |
| ATGAAAG -  | STY4299  | 100    | STY2523   | 62.037 STY4299  | 99.5 STY2677   |
|            | STY3876  | 72.549 | STY3711   | 71.287 STY2961  | 18.65 STY3711  |
| ATGATCT, + | STY4267  | 100    | STY0949   | 58.824 STY4267  | 97.8 STY0949   |
| TTGTCCG -  | STY4894  | 100    |           | STY4894         | 99.3           |
| ATGTCTT -  | STY1244  | 100    |           | STY1244         | 98.3           |
|            | STY1762  | 34     |           | STY1762         | 6.23           |
|            | STY4259  | 100    | STY3777   | 60.396 STY4259  | 62.35 STY3777  |
| ATGGGTA -  | STY4898  | 100    | STY3115   | 52.885 STY4898  | 98.9 STY3115   |
| ATGTTAC, + | STY4932  | 100    | STY0804   | 52 STY4932      | 98.5 STY0804   |
|            | STY0377  | 63     | STY2716   | 60.784 STY0377  | 26.84 STY2716  |
| ATGTCGA -  | STY4235  | 100    | STY0746   | 72.115 STY4235  | 98.6 STY0544   |
|            | STY0026  | 60.577 | STY0336   | 57.843 STY0336  | 7.8 STY0026    |
|            | STY4610  | 53.922 | STY1625   | 41.748 STY4610  | 7.49 STY1625   |
|            | HCM1.122 | 60.577 | STY3010   | 59.259 HCM1.122 | 9.48 STY3010   |
|            | STY1271  | 60.396 | STY4821   | 60 STY4821      | 20.87 STY1271  |
| ATGGATA +  | STY2908  | 100    | STY4322   | 49.515 STY2908  | 98.8 STY4322   |
| ATGCTGG +  | STY4440  | 100    | STY2734   | 66.346 STY4440  | 99.6 STY2734   |
| ATGAGGA -  | STY4494  | 100    | STY2988   | 62.745 STY4494  | 98.8 STY2988   |
| ATGACCG -  | STY0901  | 100    | STY0750   | 59.459 STY0901  | 99.3 STY0750   |
|            | STY2048  | 64.356 | STY1633   | 62.037 STY2048  | 26.14 STY1633  |
| ATGTCGC -  | STY2714  | 100    | STY1487   | 64.545 STY2714  | 99.7 STY1487   |
| ATGAGCA +  | STY2687  | 100    | STY3129   | 70.588 STY2687  | 99.2 STY3129   |
| ATGATGA -  | STY0932  | 100    | STY2563   | 61.261 STY0932  | 98.6 STY2563   |
| ATGCCGA +  | STY0967  | 100    | STY4705   | 66.038 STY0967  | 99.2 STY2514   |
| ATGATTG, + | STY0996  | 100    | STY4862   | 64.423 STY0996  | 98.8 HCM1.227, |
|            | STY4872  | 59.048 | STY2216   | 58.252 STY4872  | 7.92 STY2216   |
| GTGGCAC +  | STY3777  | 100    | STY1242   | 77 STY3777      | 53.32 STY1242  |
|            | STY1004  | 57.282 | STY2305   | 56 STY2305      | 17.43 STY1004  |
| GTGCAAA -  | STY4703  | 100    | STY0777   | 74 STY4703      | 99.3 STY0777   |
| ATGGAAC -  | STY2655  | 100    | STY1578   | 80 STY2655      | 98.77 STY1578  |
|            | STY2844  | 64.486 | STY2473   | 61.321 STY2473  | 5.04 STY3966   |
| ATGACCA +  | STY2779  | 100    | STY2877   | 63.81 STY2779   | 98.3 STY2877   |
| TTGGTCA -  | STY2815  | 100    | STY0435   | 57.692 STY2815  | 99.1 STY0435   |
| ATGAAAA, + | STY2807  | 100    | STY0750   | 84 STY2807      | 98.8 STY0750   |
| ATGGGCC -  | STY4709  | 100    | STY4607   | 69 STY4709      | 99.4 STY2397   |
| ATGGAAA -  | STY2211  | 100    | STY3808   | 64.22 STY2211   | 98.8 STY3808   |
| ATGGACC -  | STY2546  | 100    | STY4700   | 66.337 STY2546  | 90.81 STY2548  |
| ATGACTG -  | STY2590  | 100    | STY4071   | 65.686 STY2590  | 99.3 STY4210   |
| ATGTTTT, + | STY1237  | 100    | STY0720   | 60.784 STY1237  | 100 STY0720    |
| ATGAAGC +  | STY2261  | 97     | STY2705   | 61.538 STY2261  | 94.3 STY2705   |
|            | STY3739  | 100    | STY4353   | 100 STY3739     | 98.62 STY4353  |
| GTGTATC -  | STY1576  | 100    | STY0720   | 71 STY1576      | 93.37 STY0720  |

|           |         |        |          |        |         |       |          |
|-----------|---------|--------|----------|--------|---------|-------|----------|
| ATGGAAC + | STY0341 | 100    | STY0197  | 51.961 | STY0341 | 98.69 | STY0197  |
| ATGAAAC + | STY1681 | 100    | STY1791  | 62.617 | STY1681 | 99.2  | STY3545  |
| ATGCTGC + | STY4753 | 100    | STY4345  | 67.327 | STY4753 | 99.5  | STY4345  |
| ATGCCAG + | STY0134 | 100    | STY3165  | 66.038 | STY0134 | 99.4  | STY3220  |
| ATGCTGA - | STY2152 | 100    | STY2151  | 96     | STY2151 | 57.34 | STY2152  |
|           | STY4676 | 83     | STY3827  | 54     | STY4676 | 32.98 | STY3827  |
|           | STY4892 | 53.465 | STY3877  | 51     | STY4892 | 6.61  | STY3877  |
| ATGGAAT + | STY2544 | 100    | STY0455  | 56.604 | STY2544 | 90.16 | STY0455  |
| ATGATTA - | STY2570 | 100    | STY2164  | 59     | STY2570 | 97.9  | STY2164  |
| ATGGGTA - | STY4802 | 100    | STY2536  | 61.468 | STY4802 | 98.6  | STY2536  |
|           | STY1272 | 62     | STY2967  | 61.111 | STY4485 | 3.5   | STY3137  |
| ATGAGTA - | STY2589 | 100    |          |        | STY2589 | 99.3  |          |
| ATGCAAA + | STY1229 | 100    | STY0112  | 63.366 | STY1229 | 99.6  | STY0112  |
| ATGCGTT - | STY1767 | 100    | STY2450  | 66     | STY1767 | 99.6  | STY2450  |
| ATGTTGA - | STY1111 | 100    |          |        | STY1111 | 99.7  |          |
| ATGAAGT + | STY0336 | 100    | STY3920  | 79     | STY0336 | 98.8  | STY0593  |
| ATGAGTC + | STY0255 | 100    | STY0931  | 61.765 | STY0255 | 99.4  | STY0931  |
| ATGAGAC - | STY0485 | 100    | HCM2.001 | 55.769 | STY0485 | 99.8  | HCM2.001 |
| ATGGCTA + | STY0176 | 100    | STY0780  | 60     | STY0176 | 98.4  | STY0780  |
| ATGGAAC - | STY1796 | 100    | STY4416  | 70     | STY1796 | 98.9  | STY4416  |
| GTGAAAA + | STY2900 | 100    | STY2803  | 82.692 | STY2900 | 98.9  | STY2803  |
| ATGACTA + | STY1662 | 100    | STY2495  | 74.257 | STY1662 | 99.1  | STY2495  |
| GTGAGTC + | STY1579 | 100    | STY3981  | 89     | STY1579 | 98.8  | STY3981  |
| ATGAAGA - | STY4425 | 100    | STY3570  | 72     | STY4425 | 98.9  | STY3570  |
| ATGAAAA - | STY0351 | 100    | STY1628  | 60.396 | STY0351 | 98.6  | STY1878  |
| ATGTCGG + | STY0409 | 100    | STY1927  | 61     | STY0409 | 98.8  | STY1927  |
| GTGTTAA + | STY0445 | 100    | STY1302  | 59.406 | STY0445 | 99.6  | STY1302  |
| ATGATTA + | STY0144 | 100    | STY0043  | 72.277 | STY0144 | 98.9  | STY0812  |
| ATGGTCT - | STY2593 | 100    | STY0830  | 60.396 | STY2593 | 100   | STY0830  |
| ATGCGTC - | STY2904 | 100    | STY4491  | 72     | STY2904 | 98.4  | STY3354  |
| ATGTCTC - | STY1753 | 100    |          |        | STY1753 | 98.9  |          |
| ATGAGTC + | STY4251 | 100    | STY4252  | 67     | STY4251 | 99.6  | STY4172  |
| ATGCGTA + | STY0504 | 100    | STY2678  | 70     | STY0504 | 99.2  | STY0985  |
| GTGAAAA + | STY0617 | 100    | STY0173  | 79     | STY0617 | 99.1  | STY0173  |
| ATGGCCT + | STY2446 | 99.01  | STY3319  | 63.462 | STY2446 | 98.5  | STY3319  |
| ATGACCT - | STY4771 | 100    | STY1755  | 68.932 | STY4771 | 99.32 | STY1755  |
| GTGACAC + | STY2838 | 100    | STY2259  | 59.813 | STY2838 | 98.6  | STY2259  |
| ATGATTG + | STY4161 | 100    | STY0985  | 67     | STY4161 | 98.4  | STY0985  |
| ATGAAAT + | STY3458 | 100    | STY4816  | 72     | STY3458 | 96.62 | STY2405  |
| ATGTTGG - | STY2522 | 100    | STY1972  | 70     | STY2522 | 98.7  | STY1972  |
| ATGGATT - | STY2786 | 100    | STY2964  | 55.446 | STY2786 | 99.6  | STY2964  |
| ATGAATA + | STY0032 | 100    | STY0592  | 65.347 | STY0032 | 94.57 | STY3087  |
| ATGAAAA - | STY4774 | 100    | STY0475  | 65.094 | STY4774 | 99.3  | STY0475  |
| ATGAAAA - | STY4896 | 100    | STY1023  | 68     | STY4896 | 98.6  | STY2062  |
| ATGGCCT - | STY4903 | 100    | STY1955  | 58.252 | STY4903 | 99.5  | STY1955  |
| ATGCGTG + | STY4086 | 100    |          |        | STY4086 | 99.4  |          |
| ATGGCGA + | STY4180 | 100    | STY3076  | 61.165 | STY4180 | 98    | STY3076  |
| ATGAGTC - | STY3451 | 100    | STY3458  | 62.385 | STY3451 | 93.26 | STY3458  |
| ATGAAAA - | STY2511 | 100    | STY4258  | 71     | STY2511 | 98.4  | STY4258  |
| ATGAATC + | STY2506 | 100    | HCM2.012 | 83     | STY2506 | 98.3  | HCM2.012 |

|           |          |     |          |        |          |       |          |
|-----------|----------|-----|----------|--------|----------|-------|----------|
| ATGAAAAI- | STY3017  | 100 | STY1705  | 71     | STY3017  | 99.5  | STY1705  |
| ATGACCA-  | STY3787  | 100 | STY3351  | 66.019 | STY3787  | 99.3  | STY2801  |
| ATGAGTA-  | STY0737  | 100 | STY3578  | 58.416 | STY0737  | 99.2  | STY3578  |
| ATGAGTA+  | STY0780  | 100 | STY0176  | 61.165 | STY0780  | 99.6  | STY0176  |
| ATGCAAC+  | STY3876  | 100 | STY1370  | 77     | STY3876  | 97.9  | STY3711  |
| ATGATCC+  | STY4327  | 100 | STY3762  | 62.162 | STY4327  | 98.9  | STY3762  |
| ATGGTTC-  | STY3881  | 100 | STY4240  | 63.107 | STY3881  | 99.2  | STY3111  |
| ATGATAT(+ | STY0909  | 100 | STY0366  | 60.577 | STY0909  | 99    | STY0366  |
| ATGATTG-  | STY4339  | 100 | STY0879  | 70     | STY4339  | 98.2  | STY0879  |
| ATGTCGC-  | STY4463  | 100 | STY0624  | 66     | STY4463  | 99.1  | STY4933  |
| GTGGAAC+  | STY2825  | 100 | HCM2.005 | 68.224 | STY2825  | 99.2  | HCM2.005 |
| ATGTTGC-  | STY2085  | 100 | STY0492  | 60     | STY2085  | 99.2  | STY0492  |
| ATGAAAC+  | STY3713  | 100 | STY2621  | 83.168 | STY3713  | 99.1  | STY2621  |
| ATGAAAT(+ | STY3862  | 100 | STY0714  | 53.846 | STY3862  | 99.3  | STY0714  |
| GTGCAGA+  | STY1697  | 100 | STY0063  | 61     | STY1697  | 99.31 | STY0063  |
| GTGCGAC+  | STY2675  | 100 | STY0148  | 56     | STY2675  | 84    | STY0148  |
| ATGGGGC-  | STY0256  | 100 | STY0437  | 100    | STY1844  | 99.8  | STY3154  |
| ATGAATG-  | STY2850  | 100 | STY3102  | 60     | STY2850  | 98.9  | STY3102  |
| ATGACAG+  | STY0060  | 100 | STY0706  | 84     | STY0060  | 97.9  | STY0706  |
|           | STY1013  | 98  | STY4775  | 28     | STY1013  | 93.3  | STY4775  |
| ATGATAA+  | STY1994  | 91  | STY2379  | 62.162 | STY1994  | 90.8  | STY2379  |
| ATGCATA+  | STY3184  | 100 | STY1004  | 59.223 | STY3184  | 100   | STY1459  |
| ATGCTCT+  | STY4728a | 97  | STY4729  | 29     | STY4728a | 9.29  | STY4729  |
| ATGCACA+  | STY4859  | 100 | STY4822  | 57.843 | STY4859  | 97.3  | STY4822  |
| ATGAATA(+ | STY2256  | 100 | STY2700  | 75     | STY2256  | 95.8  | STY2700  |
| ATGACAT(+ | STY4478  | 100 | STY2477  | 68.932 | STY4478  | 94.8  | STY4479  |
| ATGTCTC.  | STY2113  | 100 | STY1825  | 61     | STY2113  | 99.3  | STY1825  |
| GTGAAAT+  | STY4453  | 100 | HCM2.005 | 59.813 | STY4453  | 98.9  | HCM2.005 |
| ATGGGCA-  | STY0009  | 100 | STY0278  | 61     | STY0009  | 99.3  | STY3474  |
|           | STY4602  | 91  | STY2883  | 88     | STY4602  | 85.2  | STY2883  |
| ATGAGCA+  | STY0048  | 100 | STY0511  | 59.223 | STY0048  | 99.2  | STY0511  |
| ATGACAC-  | STY3636  | 100 | STY1544  | 51.961 | STY3636  | 99.3  | STY1544  |
| ATGTATC.  | STY3597  | 100 | STY0499  | 68.317 | STY3597  | 99.6  | STY0499  |
| ATGAGTA+  | STY3622  | 100 | STY0359  | 65.686 | STY3622  | 98.7  | STY0359  |
| ATGACCG-  | STY3228  | 100 | STY1825  | 62.376 | STY3228  | 99.31 | STY1825  |
| ATGAGAA+  | STY1296  | 100 |          |        | STY1296  | 99.6  |          |
| GTGGCG/+  | STY1917  | 100 | STY1916  | 88     | STY1917  | 87.75 | STY2537  |
| ATGATTT-  | STY3162  | 100 | STY2835  | 65.421 | STY3162  | 98.3  | STY2401  |
| ATGAAAA+  | STY3097  | 100 | STY3429  | 79     | STY3097  | 99    | STY3429  |
| ATGACAA+  | STY3125  | 100 | STY1749  | 57.843 | STY3125  | 99.1  | STY1749  |
| ATGAACA+  | STY3819  | 100 | STY3891  | 60.748 | STY3819  | 98.4  | STY3891  |
| TTGATTA(+ | STY3108  | 100 | STY3652  | 50     | STY3108  | 99.7  | STY3652  |
| ATGGCAC+  | STY3846  | 100 | STY3380  | 63.462 | STY3846  | 95.6  | STY0534  |
| ATGACAA-  | STY3594  | 100 | STY0144  | 85     | STY3594  | 99.1  | STY0144  |
| ATGACGC-  | STY3610  | 100 | HCM1.167 | 65.347 | STY3610  | 99.1  | STY3200  |
| GTGAAAG-  | STY3635  | 100 | STY1928  | 61.765 | STY3635  | 99.6  | STY1928  |
| ATGAAAG-  | STY3741  | 100 |          |        | STY3741  | 98.8  |          |
| ATGTTAA(+ | STY3134  | 100 | STY0202  | 62.136 | STY3134  | 98.9  | STY0717  |
| ATGAATG+  | STY1309  | 100 | STY0887  | 72     | STY1309  | 98.4  | STY4172  |
| ATGCGAC+  | STY3789  | 100 | STY4635  | 71.963 | STY3789  | 99.1  | STY4635  |
| ATGACCG+  | STY0527  | 100 | STY3468  | 60.194 | STY0527  | 99.3  | STY4628  |



|            |          |        |         |        |          |       |          |
|------------|----------|--------|---------|--------|----------|-------|----------|
| ATGAACA -  | STY0628  | 100    | STY2894 | 84     | STY0628  | 98.8  | STY2894  |
| ATGAAAG +  | STY0976  | 100    | STY0853 | 63.303 | STY0976  | 98.7  | STY0853  |
| ATGTCTT, + | STY0338  | 100    | STY3642 | 58.824 | STY0338  | 98.5  | STY3642  |
| ATGTCAG -  | STY1514  | 100    |         |        | STY1514  | 97.3  |          |
| ATGCACT +  | STY1479  | 100    | STY1488 | 69.307 | STY1479  | 99    | STY1488  |
|            | STY3708  | 60.55  |         |        | STY3708  | 15.16 |          |
| ATGGCTA -  | STY1403  | 100    | STY4737 | 62     | STY1403  | 99.1  | STY4737  |
| ATGCCGT +  | STY1353  | 100    | STY2293 | 68.932 | STY1353  | 56.34 | STY2293  |
| ATGACAA +  | STY0556  | 100    |         |        | STY0556  | 99.3  |          |
| ATGAAGC -  | STY1005  | 100    | STY0502 | 57.143 | STY1005  | 98.9  | STY0502  |
| ATGCGCC -  | STY0954  | 100    | STY0707 | 67.647 | STY0954  | 98.8  | STY0955  |
| GTGGTGC -  | STY0669  | 100    | STY0071 | 63.366 | STY0669  | 74.79 | STY0071  |
| ATGATTA, - | STY0652  | 100    | STY3312 | 69.307 | STY0652  | 98.1  | STY3312  |
| ATGAAAA, + | STY1319  | 100    | STY0824 | 69.444 | STY1319  | 98.9  | STY0824  |
| GTGCAGA -  | STY1491a | 100    | STY4240 | 57.426 | STY1491a | 97.92 | STY1491a |
| GTGAATA +  | STY1443  | 100    | STY4158 | 65     | STY1443  | 98.1  | STY4158  |
| GTGACCG +  | STY1410  | 100    | STY0855 | 74     | STY1410  | 98.38 | STY3461  |
| ATGAAGC +  | STY1376  | 100    |         |        | STY1376  | 97.78 |          |
| ATGGCGC +  | STY3095  | 100    | STY0915 | 62.376 | STY3095  | 98.7  | STY0915  |
| ATGTTAT +  | STY3149  | 100    | STY2332 | 71.569 | STY3149  | 99.2  | STY2332  |
| ATGAAGG +  | STY3186  | 100    |         |        | STY3186  | 99.16 |          |
| ATGAATA -  | STY3252  | 100    | STY0165 | 69     | STY3252  | 98.4  | STY0165  |
| ATGCAAG +  | STY0489  | 100    | STY2615 | 60.377 | STY0489  | 99.5  | HCM2.000 |
| ATGTACC -  | STY4228  | 100    | STY2810 | 61.765 | STY4228  | 98.9  | STY2810  |
| ATGAACG -  | STY4117  | 100    |         |        | STY4117  | 98.2  |          |
| ATGCAGC +  | STY4018  | 100    | STY4786 | 67     | STY4018  | 97.7  | STY4786  |
| ATGAAAA, - | STY3353  | 100    | STY2698 | 63.303 | STY3353  | 99    | STY1545  |
| GTGAAAA -  | STY3159  | 100    | STY3158 | 47     | STY3159  | 98.3  | STY3158  |
|            | STY0255  | 48.113 |         |        | STY0255  | 5.3   |          |
|            | STY1829  | 65.347 | STY3384 | 61.765 | STY3593  | 22.76 | STY1829  |
| ATGTCAC +  | STY4170  | 100    | STY0890 | 73     | STY4170  | 98.6  | STY1357  |
| ATGACAT -  | STY4133  | 100    |         |        | STY4133  | 96.07 |          |
| ATGGCTT -  | STY4099  | 100    | STY3945 | 66.99  | STY4099  | 99.4  | STY3945  |
| ATGAAAT -  | STY4045  | 100    | STY2937 | 63.107 | STY4045  | 98    | STY2937  |
| ATGATGA +  | STY0389  | 100    | STY2040 | 57     | STY0389  | 98.8  | STY1047  |
| ATGACTA -  | STY2975  | 100    | STY0469 | 59     | STY2975  | 98.9  | STY0469  |
| ATGGGAT -  | STY3302  | 100    | STY0943 | 60.194 | STY3302  | 98.5  | STY0943  |
| ATGTGTA +  | STY2977  | 100    | STY2869 | 75     | STY2977  | 99    | STY2869  |
| ATGATGA +  | STY2412  | 100    | STY4470 | 59.223 | STY2412  | 99    | STY4470  |
| ATGTCTT -  | STY2293  | 100    | STY2317 | 75     | STY2293  | 98.5  | STY2317  |
| ATGCGTT -  | STY2334  | 100    | STY1696 | 59     | STY2334  | 98.3  | STY3472  |
| ATGAAAC -  | STY2474  | 100    | STY3965 | 100    | STY2474  | 98.9  | STY3965  |
| ATGCCGC +  | STY2454  | 100    | STY1306 | 58.416 | STY2454  | 99.1  | STY1306  |
| ATGGAAC -  | STY2374  | 100    | STY3888 | 58     | STY2374  | 99.3  | STY0469  |
| ATGATGC -  | STY1975  | 100    | STY3109 | 69.307 | STY1975  | 99.3  | STY3109  |
| GTGGCCC +  | STY4380  | 100    | STY3901 | 59.406 | STY4380  | 99.7  | STY3901  |
| ATGGCTT -  | STY4212  | 100    | STY2136 | 68     | STY4212  | 99.1  | STY2136  |
| ATGGATT -  | STY3522  | 100    | STY2555 | 65.347 | STY3522  | 99    | STY4874  |
| ATGTCTA, - | STY4191  | 100    |         |        | STY4191  | 99.4  |          |
| ATGCCAT -  | STY4284  | 100    | STY4820 | 76     | STY4284  | 98.3  | STY4820  |
| ATGTTAG, + | STY4762  | 100    | STY2792 | 66     | STY4762  | 98.5  | STY3628  |

|           |          |        |          |        |          |       |          |
|-----------|----------|--------|----------|--------|----------|-------|----------|
| ATGTCTA(- | STY3360  | 100    | STY3360  | 66.667 | STY3360  | 99.3  | STY1078  |
| ATGAAAC(+ | STY2959  | 100    | STY0186  | 61.765 | STY2959  | 100   | STY4280  |
| ATGCCGC(+ | STY2416  | 100    | STY3511  | 85     | STY2416  | 99.3  | STY3511  |
| ATGGCTG(+ | STY3334  | 100    | STY3406  | 77     | STY3334  | 99.4  | STY3406  |
| ATGAGCA(- | STY1712  | 100    | STY2960  | 64.762 | STY1712  | 98    | STY2621  |
| ATGAAAC(+ | STY0777  | 100    | STY4703  | 74     | STY0777  | 98.8  | STY4703  |
| ATGCGCA(- | STY0835  | 100    | STY4252  | 59.223 | STY0835  | 99.4  | STY4252  |
|           | STY3186  | 62.5   |          |        | STY3186  | 5.34  |          |
| GTGGCGC(+ | STY1214  | 100    | STY4292  | 64.706 | STY1214  | 99.5  | STY4292  |
| ATGACAA(- | STY0826  | 100    | STY3396  | 75     | STY0826  | 99    | STY2912  |
| ATGACGA(+ | STY3512  | 100    |          |        | STY3512  | 90.62 |          |
| ATGATGA(- | STY4032  | 100    |          |        | STY4032  | 98.7  |          |
| ATGGAAA(+ | STY3366  | 100    | STY4732  | 70     | STY3366  | 98.9  | STY4732  |
| ATGAAAA(- | STY1716  | 100    | STY0642  | 83     | STY1716  | 97.2  | STY4687  |
| ATGAAAA(+ | STY0872  | 100    | STY0380  | 60.784 | STY0872  | 99.2  | STY0380  |
| ATGACCG(+ | STY4740  | 97     | STY1791  | 86.538 | STY4740  | 93.8  | STY1791  |
| ATGAAAA(- | STY0428  | 100    | STY1538  | 59.804 | STY0428  | 98.4  | STY1538  |
|           | STY4883  | 99     | STY0544  | 61.538 | STY4883  | 89.7  | STY0544  |
| ATGAAAC(+ | STY0495  | 100    | STY4495  | 59.813 | STY0495  | 99.7  | STY4495  |
| TTGGTGC(- | STY0599  | 100    | STY2350  | 70.192 | STY0599  | 97.4  | STY2350  |
| ATTCACA(- | STY0602  | 100    | STY0602a | 99     | STY0602  | 68.13 | STY0602a |
| ATGCGTA(+ | STY0329  | 99     | STY0081  | 61.538 | STY0329  | 97.9  | STY4848  |
| ATGGTGC(+ | STY0375  | 97.059 | STY2879  | 63.462 | STY0378  | 43.54 | STY0375  |
| ATGAGTC(+ | STY0377  | 99     | STY0374  | 71     | STY0377  | 97    | STY0374  |
| GTGGACC(- | STY3106  | 100    | STY0808  | 89.109 | STY3106  | 99.6  | STY0808  |
| ATGTTTC(- | STY4516  | 97     | STY2840  | 58.333 | STY4516  | 93.3  | STY2840  |
| ATGGGCC(+ | STY3799  | 99     | STY0257  | 57.547 | STY3799  | 72.3  | STY0257  |
| ATGAGTA(+ | STY3999  | 100    |          |        | STY3999  | 99    |          |
| ATGTGTA(- | STY3314  | 100    | STY2978  | 71.845 | STY3314  | 99.6  | STY2978  |
| ATGTGTA(+ | STY1528  | 100    | STY4223  | 63.725 | STY1528  | 98.7  | STY4223  |
| ATGGTAA(+ | STY1540  | 100    | STY3130  | 53.922 | STY1540  | 86.46 | STY3130  |
| ATGAAGA(+ | STY3974  | 99     | STY3975  | 62.745 | STY3974  | 99.1  | STY3214  |
| ATGTCAG(- | STY4048  | 100    | STY1256  | 70     | STY4048  | 97.85 | STY3743  |
| ATGATGA(- | STY4177  | 100    | STY2271  | 46     | STY4177  | 99.5  | STY2271  |
| ATGCAGA(+ | STY3987  | 100    | STY2711  | 60     | STY3987  | 99.3  | STY3122  |
|           | STY3710  | 51.923 | STY2494  | 45.192 | STY3710  | 19.29 | STY2494  |
| GTGACCC(- | STY1757  | 100    | STY0643  | 73     | STY1757  | 94.86 | STY0643  |
|           | STY3641  | 31.081 |          |        | STY3641  | 31.08 |          |
|           | STY2012  | 72     | STY2207  | 66     | STY2012  | 65.09 | STY4608  |
|           | STY2958  | 72.277 | STY4871  | 54.455 | STY2958  | 64.44 | STY4871  |
| ATGATGG(- | STY3643  | 98     | STY0798  | 66     | STY3643  | 90    | STY2460  |
|           | HCM1.183 | 58.716 |          |        | HCM1.183 | 36.78 |          |
| ATGTTGG(- | STY3487  | 100    | STY2365  | 59.223 | STY3487  | 100   | STY0488  |
| ATGGAAA(- | STY2147  | 100    | STY2148  | 100    | STY2148  | 58.43 | STY2147  |
|           | STY4597  | 86     | STY2205  | 74     | STY4597  | 79.1  | STY2205  |
|           | STY4598  | 79     | STY2206  | 73     | STY4598  | 67.38 | HCM1.252 |
|           | STY2082  | 63     | STY2103  | 59.804 | STY2082  | 32.56 | STY2103  |

|          |          |        |          |         |          |       |          |
|----------|----------|--------|----------|---------|----------|-------|----------|
|          | STY4288  | 76     | STY0523  | 75.248  | STY4875  | 59.07 | STY4020  |
|          | HCM2.013 | 72     | STY2526  | 57.282  | HCM2.013 | 52.44 | HCM1.54  |
|          | STY4490  | 63.366 | STY2397  | 61.765  | STY3587  | 26    | STY4490  |
|          | STY1941  | 47     | STY2900  | 24      | STY1941  | 38.24 | STY2900  |
|          | STY1503  | 60.952 | STY2668  | 51      | STY1503  | 15.77 | STY2668  |
|          | STY2493  | 100    | STY2203  | 85      | STY2493  | 99.7  | STY1649  |
|          | STY2581  | 100    | STY2159  | 70      | STY2581  | 98.4  | STY2159  |
|          | STY2585  | 100    | STY2584  | 76      | STY2585  | 99.2  | STY2584  |
|          | STY2710  | 100    | STY0007  | 72      | STY2710  | 99    | STY0007  |
| ATGAATC- | STY2717  | 100    | STY3511  | 71      | STY2717  | 98.4  | STY4477  |
|          | STY0157  | 52.427 |          | STY0157 |          | 31.77 |          |
| ATGCTCG- | STY0205  | 100    | STY3920  | 67      | STY0205  | 100   | STY0593  |
| ATGAATA+ | STY0326  | 100    | STY2350  | 61      | STY0326  | 100   | STY2350  |
|          | STY0587  | 100    | STY2349  | 58      | STY0587  | 100   | STY2349  |
| ATGGTAT+ | STY1030  | 100    | STY0122  | 62.963  | STY1030  | 100   | STY0311  |
| ATGATTA+ | STY1052  | 100    | STY2035  | 94      | STY1052  | 100   | STY2035  |
| ATGGAAT- | STY2027  | 100    | STY1060  | 90      | STY2027  | 100   | STY1060  |
| ATGCACT+ | STY0405  | 100    | STY4081  | 65.347  | STY0405  | 100   | STY4081  |
| ATGACTA- | STY1019  | 100    | STY4202  | 58.252  | STY1019  | 100   | STY4202  |
| ATGGCAA+ | STY1046  | 100    | STY2041  | 85      | STY1046  | 100   | STY2041  |
| ATGAGTT- | STY2021  | 100    | STY1066  | 78      | STY2021  | 100   | STY1066  |
| ATGAACA+ | STY3087  | 100    | STY3175  | 66.055  | STY3087  | 100   | STY3175  |
| ATGGCTA+ | STY3285  | 100    | STY1729  | 74.257  | STY3285  | 100   | STY1729  |
| ATGTATC- | STY0947  | 100    | STY1405  | 88      | STY0947  | 100   | HCM1.210 |
| ATGTCCG+ | STY1040  | 100    | STY0138  | 58      | STY1040  | 100   | STY3294  |
| ATGCCGA+ | STY1056  | 100    | STY2031  | 94      | STY1056  | 100   | STY2031  |
| ATGCCGA- | STY2031  | 100    | STY1056  | 94      | STY2031  | 100   | STY1056  |
| ATGCTCA- | STY3193  | 100    | STY0820  | 48.113  | STY3193  | 100   | STY0820  |
| ATGCTGG- | STY3347  | 100    | HCM1.247 | 63.889  | STY3347  | 100   | HCM1.247 |
|          | STY1042  | 100    | STY0321  | 61.765  | STY1042  | 100   | STY2548  |
| ATGGCAC+ | STY1058  | 100    | STY2029  | 86      | STY1058  | 100   | STY2029  |
| ATGTTCT- | STY1076  | 100    | STY3370  | 61.321  | STY1076  | 100   | STY3370  |
| GTGATTT- | STY2050  | 100    | STY1049  | 60.784  | STY2050  | 100   | STY3956  |
| ATGACTA- | STY0064  | 100    | STY3532  | 100     | STY0064  | 100   | STY3532  |
| ATGAGCA+ | STY3667  | 100    | STY4636  | 90      | STY3667  | 100   | STY4636  |
| ATGAGCG+ | STY4854  | 100    | STY2296  | 61.386  | STY4854  | 100   | STY2820  |
|          | STY4403  | 100    | STY3601  | 61.165  | STY4403  | 100   | STY3601  |
| ATGTCTA+ | STY4534  | 100    | STY3635  | 62      | STY4534  | 100   | STY3635  |
| TTGGCCT- | STY4677  | 100    | STY4677  | 86      | STY4677  | 100   | STY3644  |
| ATGAGAC+ | STY4830  | 100    | STY4122  | 63.462  | STY4830  | 100   | STY1324  |
|          | STY4870  | 100    |          | STY4870 |          | 70    |          |
| ATGACAC+ | STY4578  | 100    | STY0674  | 61.165  | STY4578  | 100   | STY0221  |
| ATGTTTC+ | STY4595  | 100    | HCM1.20c | 70.588  | STY4595  | 100   | HCM1.20c |
| ATGAGCA- | STY4636  | 100    | STY3667  | 90      | STY4636  | 100   | STY3667  |
| ATGCCGC- | HCM1.04c | 100    | HCM1.136 | 100     | HCM1.204 | 100   | HCM1.238 |
| TTGGGCC- | STY4674  | 100    | STY0367  | 54      | STY4674  | 100   | STY0367  |
| ATGACGA+ | STY4579  | 100    | STY0674  | 72.277  | STY4579  | 100   | STY0674  |
| ATGATTA+ | STY3957  | 100    | STY4176  | 66.019  | STY3957  | 98.3  | STY4176  |
| ATGAGCC- | STY3937  | 100    | STY2826  | 64.762  | STY3937  | 99    | STY2826  |
| ATGGCTT+ | STY3907  | 100    |          | STY3907 |          | 99.9  |          |
| ATGGGCA+ | STY4080  | 100    | STY4080  | 67.308  | STY4080  | 98.9  | STY0703  |
| ATGGGTC- | STY3492  | 100    | STY2678  | 65      | STY3492  | 99.4  | STY2678  |

|           |           |        |         |         |                 |
|-----------|-----------|--------|---------|---------|-----------------|
|           | STY2039   | 62.745 |         | STY2039 | 11.36           |
| ATGGCTG - | STY3523   | 100    | STY2406 | 59.223  | STY3523 99.2    |
| ATGTTGA - | STY3554   | 100    | STY4234 | 61.765  | STY3554 99.7    |
| ATGAAGA - | STY0688   | 100    | STY0896 | 80      | STY0688 99.4    |
|           | STY0012   | 65.385 | STY3554 | 63.462  | STY0012 11.09   |
| ATGACTG - | STY0731   | 100    | STY0183 | 51      | STY0731 99.6    |
| ATGTCAC - | STY3954   | 100    | STY3812 | 71      | STY3954 99      |
| ATGGAGC + | STY1526   | 100    | STY1915 | 78.218  | STY1526 99.9    |
|           | STY2521   | 64     | STY2500 | 63.366  | STY2500 10.6    |
| ATGCAGG - | STY3935   | 100    | STY4311 | 63.81   | STY3935 92.37   |
| ATGAGCA - | STY3898   | 100    |         |         | STY3898 99.3    |
| ATGCTTA + | STY1779   | 100    | STY4459 | 55.882  | STY1779 99.8    |
| ATGAGAG - | STY0809   | 100    |         |         | STY0809 98.7    |
| ATGAAAG - | STY2235   | 100    | STY2235 | 63.366  | STY2235 98.4    |
| ATGATTA + | STY4081   | 100    |         |         | STY4081 98.7    |
| ATGAAAA + | STY0098   | 100    | STY0099 | 100     | STY0098 80.11   |
| ATGTCTG - | STY0160   | 100    | STY0025 | 51      | STY0160 99.5    |
| ATGAAAG + | STY0193   | 100    |         |         | STY0193 99.4    |
| ATGTATG - | STY0233   | 100    | STY3824 | 49      | STY0233 99.2    |
| ATGGCCC + | STY4392   | 100    | STY4393 | 29      | STY4392 98.8    |
| ATGTCGA + | STY4337   | 100    | STY4115 | 62.5    | STY4337 99.7    |
| TTGACTA + | STY1251   | 100    | STY1290 | 63.725  | STY1251 99.4    |
| ATGGCAC + | STY1868   | 100    | STY1431 | 65      | STY1868 98.9    |
| GTGACCA - | STY1830   | 100    | STY0472 | 62.376  | STY1830 99.5    |
| ATGACAG - | STY2329   | 100    | STY1573 | 65      | STY2329 96.98   |
| ATGAAAA + | STY1254   | 100    | STY0860 | 61.905  | STY1254 98.8    |
| ATGCAAC - | STY1859   | 99     |         |         | STY1859 98.5    |
| ATGAAAT(- | STY1828   | 100    | STY3338 | 64.762  | STY1828 98.8    |
| ATGGAAT + | STY2332   | 100    | STY1958 | 88      | STY2332 99.6    |
| ATGCGTG + | STY4949   | 100    | STY2791 | 65      | STY4949 98.4    |
| ATGTCAA - | STY2321   | 100    | STY4473 | 77      | STY2321 98.1    |
| ATGTTTA + | STY2365   | 100    | STY4170 | 60.194  | STY2365 98.78   |
|           | STY4514   | 63.208 | STY0301 | 60.396  | STY0301 26.65   |
| GTGCGTA + | STY0329   | 99     | STY0343 | 99      | STY0329 99      |
|           | STY0130   | 73     | STY4273 | 62.5    | STY0130 57.24   |
| ATGAATT(+ | STY1082   | 100    |         |         | STY1082 99      |
| ATGCCAC + | STY3748   | 100    | STY2809 | 63.208  | STY3748 99.4    |
| ATGCCGC - | STY3040   | 100    | STY0566 | 63      | STY3040 97.8    |
| ATGAAAA + | STY2618   | 100    | STY3036 | 75.49   | STY2618 99.6    |
| ATGAACT - | STY2660   | 100    | STY0277 | 66      | STY2660 99.4    |
|           | HCM2.005: | 57.692 | STY2778 | 46.602  | HCM2.005: 38.58 |
| ATGGCTA - | STY2771   | 100    | STY4936 | 92      | STY2771 97.5    |
|           | STY0522   | 59.804 |         |         | STY0522 15.1    |
| ATGACGC - | STY2751   | 100    |         |         | STY2751 96      |
| ATGAGAC - | STY2790   | 100    | STY4181 | 81      | STY2790 99.4    |
|           | STY4610   | 65     | STY1636 | 60.577  | STY3692 33.6    |
| ATGAATA + | STY3812   | 100    | STY3954 | 69      | STY3812 99.1    |
|           | STY1625   | 87     | STY4607 | 61.765  | STY1625 69.56   |
| ATGACGT - | STY3036   | 100    | STY2941 | 65      | STY3036 98.8    |
|           | STY3071   | 78     | STY3278 | 59.615  | STY3071 38.31   |
| ATGAGCA - | STY2678   | 100    | STY1573 | 88      | STY2678 96.1    |

|            |         |        |          |        |         |       |         |
|------------|---------|--------|----------|--------|---------|-------|---------|
| ATGCGCT -  | STY2724 | 100    | STY1652  | 58.416 | STY2724 | 97.32 | STY3480 |
| ATGCCAG +  | STY0971 | 100    | STY3073  | 69     | STY0971 | 96.6  | STY3073 |
| ATGTTAG +  | STY1009 | 100    | STY0006  | 67     | STY1009 | 98.49 | STY0006 |
| ATGCAGC +  | STY0993 | 100    | STY2396  | 62     | STY0993 | 99.9  | STY2396 |
| ATGCCAC -  | STY2161 | 100    | STY2237  | 63.107 | STY2161 | 97.9  | STY2237 |
| ATGAACG +  | STY2284 | 100    | STY0287  | 59.406 | STY2284 | 98.7  | STY0287 |
| GTGAACC -  | STY2563 | 100    | STY4318  | 68     | STY2563 | 99.1  | STY4318 |
| ATGTCTC +  | STY2259 | 100    | STY2243  | 73     | STY2259 | 97.3  | STY2701 |
| GTGTTTCG - | STY1851 | 100    | STY4064  | 65.347 | STY1851 | 90.23 | STY4064 |
| GTGATAG +  | STY1169 | 100    | STY3519  | 72     | STY1169 | 99    | STY3519 |
| ATGAAGC -  | STY1784 | 100    | STY2185  | 56.436 | STY1784 | 99.2  | STY2185 |
| ATGTCTT +  | STY0403 | 100    | STY4473  | 73     | STY0403 | 98.5  | STY4473 |
| ATGTCGC +  | STY1793 | 100    |          |        | STY1793 | 99.2  |         |
| ATGTTAT(-  | STY4712 | 100    | STY3383  | 60.396 | STY4712 | 99    | STY4793 |
|            | STY2203 | 100    | STY1649  | 89     | STY2203 | 46.88 | STY1649 |
| ATGTCGT +  | STY1730 | 100    | STY2390  | 74     | STY1730 | 97.77 | STY2390 |
| GTGATGC -  | STY4734 | 100    | STY4820  | 63.366 | STY4734 | 99.1  | STY4820 |
|            | STY0089 | 64.356 | STY3244  | 62.136 | STY3160 | 16.32 | STY4875 |
| ATGAACA +  | STY2505 | 100    | STY3563  | 62.745 | STY2505 | 99    | STY3563 |
|            | STY3687 | 63.462 | STY3989  | 63.366 | STY0426 | 13.32 | STY3687 |
| ATGGCTT +  | STY4876 | 100    | STY2911  | 70     | STY4876 | 98.2  | STY2911 |
| ATGTTTG +  | STY2528 | 100    | STY3526  | 63.81  | STY2528 | 98.9  | STY3526 |
| ATGAAGC +  | STY2562 | 99     | STY2073  | 66.667 | STY2562 | 98    | STY0535 |
|            | STY1960 | 63.889 | STY3116  | 62.385 | STY4015 | 44.65 | STY1960 |
| ATGATTC(-  | STY1852 | 100    | STY0579  | 60.194 | STY1852 | 98.5  | STY0579 |
|            | STY3084 | 64.22  | STY4500  | 62     | STY3090 | 45.49 | STY3084 |
| ATGTCTT +  | STY0400 | 100    | STY4402  | 77.982 | STY0400 | 99.2  | STY4402 |
| ATGAACA +  | STY2842 | 100    | STY3639  | 64.706 | STY2842 | 98.6  | STY3639 |
| ATGAGTG +  | STY0423 | 100    | STY2791  | 65.421 | STY0423 | 99.1  | STY2791 |
| ATGGCCA +  | STY4432 | 100    | STY4224  | 87     | STY4432 | 99.7  | STY4224 |
| ATGAAAC -  | STY2577 | 100    | STY2800  | 56.436 | STY2577 | 99.3  | STY2800 |
| ATGGCTG +  | STY2527 | 100    | STY3630  | 73     | STY2527 | 98.9  | STY3630 |
| ATGATGC +  | STY4422 | 100    | STY0242  | 59     | STY4422 | 99.5  | STY0242 |
| ATGAAAC -  | STY1748 | 100    | STY2218  | 79     | STY1748 | 98.5  | STY2218 |
| ATGACCT +  | STY1483 | 100    | STY0539  | 50     | STY1483 | 98.9  | STY0539 |
| ATGATGA -  | STY2491 | 100    | STY1405  | 64     | STY2491 | 98.2  | STY1405 |
| ATGAAAA +  | STY3997 | 100    | STY2094  | 58.824 | STY3997 | 99.6  | STY4201 |
| ATGGCGA -  | STY2823 | 100    |          |        | STY2823 | 99.5  |         |
| TTGAAAA -  | STY0187 | 100    | STY4804  | 70     | STY0187 | 98.6  | STY4500 |
| ATGGATT -  | STY2266 | 100    |          |        | STY2266 | 100   |         |
| ATGTTGC +  | STY0168 | 100    | STY0927  | 51.485 | STY0168 | 99.5  | STY0927 |
| ATGAAAA -  | STY0179 | 100    | HCM1.221 | 61.111 | STY0179 | 99.6  | STY0659 |
| ATGCCTG -  | STY1778 | 100    | STY3854  | 65.741 | STY1778 | 98.7  | STY0470 |
| ATGAAGT +  | STY0464 | 100    | STY3469  | 55     | STY0464 | 98.2  | STY3469 |
| ATGGAAA +  | STY1645 | 100    | STY2805  | 63.107 | STY1645 | 98    | STY4493 |
| ATGACAC -  | STY0541 | 100    | STY4902  | 65.385 | STY0541 | 98.8  | STY3151 |
| ATGGAGC -  | STY0542 | 100    | STY2595  | 54.286 | STY0542 | 98.4  | STY2595 |
| GTGAGAC -  | STY0638 | 100    | STY0979  | 70.297 | STY0638 | 97.8  | STY0979 |
| ATGGAAA -  | STY4814 | 100    | STY4503  | 64     | STY4814 | 97.2  | STY4503 |
| ATGCAGA -  | STY4947 | 100    | STY4294  | 71     | STY4947 | 98    | STY3954 |
| ATGTTTT(-  | STY3394 | 100    | STY2128  | 84     | STY3394 | 96    | STY3325 |
| ATGAATC(-  | STY4049 | 100    | STY4726  | 65     | STY4049 | 98.8  | STY4726 |

|           |         |        |          |        |         |       |          |
|-----------|---------|--------|----------|--------|---------|-------|----------|
| ATGGAGT + | STY1860 | 100    | STY1401  | 64.706 | STY1860 | 99    | STY1401  |
| ATGGGTA - | STY2657 | 100    | STY3268  | 80     | STY2657 | 98.9  | STY3268  |
| ATGCGTA + | STY2890 | 100    | STY2326  | 54.286 | STY2890 | 97.9  | STY2326  |
|           | STY0631 | 52.885 | STY4044  | 48     | STY0631 | 15.63 | STY4044  |
| ATGAGAA + | STY1032 | 100    | STY1200  | 66.337 | STY1032 | 97.43 | STY1200  |
| ATGTCTC - | STY2835 | 100    | STY3162  | 66.337 | STY2835 | 98.9  | STY1900  |
| ATGTTTG + | STY3370 | 100    | STY3771  | 77     | STY3370 | 99.1  | STY3771  |
| ATGGACA + | STY4223 | 100    | STY1528  | 65.385 | STY4223 | 98.4  | STY1528  |
| GTGAACG + | STY4306 | 100    | STY0950  | 67.925 | STY4306 | 96.6  | STY0950  |
| ATGGACG + | STY2690 | 100    | STY2080  | 64.815 | STY2690 | 99    | STY2080  |
| ATGTCCT - | STY3010 | 100    | STY0963  | 61.905 | STY3010 | 98.9  | STY1698  |
|           | STY2701 | 98     | STY2243  | 72     | STY2701 | 96.9  | STY2243  |
| TTGCACG - | STY3815 | 100    |          |        | STY3815 | 98.8  |          |
| ATGGCAC - | STY0706 | 100    | STY0060  | 66     | STY0706 | 95.7  | STY0060  |
| ATGGAAC + | STY0748 | 100    | STY2477  | 63     | STY0748 | 98.1  | STY1336  |
| ATGAAAA + | STY3023 | 100    | STY2849  | 53     | STY3023 | 98.9  | STY2849  |
| ATGCTGA + | STY0600 | 100    | HCM2.002 | 61.765 | STY0600 | 97.8  | HCM2.002 |
| ATGACTG - | STY0817 | 100    | STY3947  | 67     | STY0817 | 94.46 | STY3870  |
| ATGCGCA + | STY0803 | 100    | STY2934  | 75.728 | STY0803 | 99.5  | STY4224  |
| ATGAAAA - | STY1091 | 100    | STY4157  | 64     | STY1091 | 99.2  | STY4157  |
| ATGTCTT + | STY1216 | 100    | STY4251  | 63.366 | STY1216 | 99.4  | STY4251  |
| ATGAAGC - | STY1901 | 100    | STY3197  | 86     | STY1901 | 99.3  | STY3197  |
| ATGAGTC - | STY2137 | 100    | STY4405  | 57     | STY2137 | 99.1  | STY2764  |
| ATGGGCC - | STY2207 | 99     | STY2012  | 61     | STY2207 | 97.5  | STY2012  |
| GTGAATC + | STY3909 | 100    | STY3981  | 77     | STY3909 | 99.8  | STY3981  |
| ATGCGTT + | STY1687 | 100    | STY0567  | 62.857 | STY1687 | 99.5  | STY0567  |
| ATGCAAG - | STY2160 | 100    | STY0487  | 64.762 | STY2160 | 99.3  | STY0867  |
| ATGATGC - | STY1389 | 100    | STY0642  | 76.238 | STY1389 | 98.5  | STY2682  |
| ATGAAGC - | STY2831 | 100    |          |        | STY2831 | 98.6  |          |
| ATGGCTG - | STY0773 | 100    | STY0401  | 61.905 | STY0773 | 99.4  | STY0401  |
| ATGAATA - | STY1270 | 100    | STY4295  | 64.486 | STY1270 | 98.8  | STY4295  |
| ATGAAAG + | STY3710 | 100    | STY2459  | 67     | STY3710 | 96    | STY2459  |
| ATGACAG - | STY3467 | 100    | STY4353  | 81     | STY3467 | 97.9  | STY3739  |
| ATGGAAA + | STY2246 | 99     | STY2473  | 53.465 | STY2246 | 97.5  | STY2473  |
| ATGACTA - | STY4793 | 100    | STY1503  | 64     | STY4793 | 97.84 | STY0439  |
| ATGGTAG - | STY1726 | 100    |          |        | STY1726 | 98.9  |          |
| ATGACGC + | STY1233 | 100    | STY0921  | 61     | STY1233 | 99.1  | STY3334  |
| ATGTTTA - | STY1346 | 100    | STY0980  | 56.863 | STY1346 | 99.5  | STY0980  |
| ATGAGCA - | STY3535 | 100    | STY2678  | 64.151 | STY3535 | 99.7  | STY2678  |
| ATGGTTG + | STY4073 | 100    |          |        | STY4073 | 98.1  |          |
|           | STY2073 | 79     | STY0029  | 57.282 | STY2073 | 26.97 | STY0029  |
| ATGAAAA + | STY1180 | 100    | HCM2.006 | 63.303 | STY1180 | 99.8  | HCM2.006 |
| ATGACAA - | STY3580 | 100    | STY2663  | 61     | STY3580 | 98.9  | STY2663  |
| ATGAGCA + | STY2860 | 100    | STY0958  | 57.843 | STY2860 | 99.7  | STY3648  |
| ATGATTC - | STY3630 | 100    | STY2527  | 64.356 | STY3630 | 98.3  | STY2527  |
| ATGTTAC - | STY3651 | 100    | STY1921  | 52     | STY3651 | 99.1  | STY1921  |
| GTGTATG + | STY1220 | 100    | STY1761  | 61.321 | STY1220 | 99.2  | STY1761  |
| GTGGACC - | STY4319 | 100    | STY2318  | 66.667 | STY4319 | 97.7  | STY2318  |
| ATGACCA - | STY3143 | 100    | STY2817  | 63.208 | STY3143 | 99.9  | STY2817  |
| ATGGCTG + | STY3389 | 100    | STY3214  | 52     | STY3389 | 99.4  | STY3214  |
| ATGTCAC - | STY0466 | 100    | STY2584  | 64.486 | STY0466 | 99    | STY2479  |

|           |         |        |         |        |         |       |         |
|-----------|---------|--------|---------|--------|---------|-------|---------|
| ATGGCTT + | STY3841 | 100    | STY1567 | 64     | STY3841 | 98.3  | STY0963 |
| GTGATTG - | STY0866 | 100    | STY0924 | 80     | STY0866 | 99.4  | STY0707 |
| ATGGAAC + | STY3578 | 100    | STY3164 | 69.307 | STY3578 | 99.4  | STY3164 |
| GTGGCAC - | STY2123 | 100    | STY0310 | 68.627 | STY2123 | 99.34 | STY0310 |
| ATGGACA + | STY0998 | 100    | STY4170 | 89.109 | STY0998 | 99.4  | STY4170 |
| ATGTTAG - | STY4119 | 100    | STY0118 | 84     | STY4119 | 97.6  | STY0118 |
| ATGCGTG + | STY0197 | 100    | STY2644 | 64.078 | STY0197 | 97.96 | STY2644 |
| ATGTCCT + | STY0653 | 100    | STY0440 | 69     | STY0653 | 99.1  | STY0440 |
| ATGGCGA + | STY3155 | 100    | STY2425 | 78.218 | STY3155 | 99.3  | STY2425 |
| ATGAAAA + | STY3837 | 100    | STY3836 | 66     | STY3837 | 99    | STY3836 |
| ATGATTG + | STY2101 | 100    | STY0715 | 63.462 | STY2101 | 98.5  | STY2986 |
| ATGATCC + | STY1504 | 100    | STY1974 | 93     | STY1504 | 98.4  | STY1974 |
| ATGAAAA - | STY1487 | 100    | STY1289 | 90     | STY1487 | 98.4  | STY1289 |
| ATGATAC - | STY1485 | 100    | STY1291 | 77     | STY1485 | 99.4  | STY1291 |
| ATGCTTT - | STY0370 | 100    | STY4228 | 59.615 | STY0370 | 98.3  | STY4228 |
| ATGACAA - | STY1312 | 100    | STY0847 | 90     | STY1312 | 99.4  | STY0847 |
| ATGTCTC + | STY1928 | 100    | STY4715 | 64     | STY1928 | 98.4  | STY2645 |
| ATGACAG - | STY1978 | 100    | STY3563 | 64.078 | STY1978 | 99.5  | STY1488 |
| ATGATTA(- | STY2099 | 100    | STY4318 | 61.321 | STY2099 | 95.33 | STY4318 |
| ATGTTCA(- | STY1401 | 100    | STY1860 | 62     | STY1401 | 98.9  | STY1860 |
| ATGGAAC - | STY0523 | 100    | STY4020 | 79     | STY0523 | 87.77 | STY4020 |
| ATGGAAA + | STY0661 | 100    | STY4508 | 70     | STY0661 | 98.7  | STY4508 |
|           | STY4012 | 73     | STY2809 | 66.019 | STY4012 | 16    | STY1370 |
| ATGTTTC - | STY0635 | 100    | STY0565 | 66.055 | STY0635 | 99.2  | STY1770 |
| ATGAATG + | STY0374 | 100    | STY0377 | 67.327 | STY0374 | 93.58 | STY0377 |
| ATGGCGC - | STY0673 | 100    | STY0067 | 83.168 | STY0673 | 94.31 | STY0067 |
|           | STY4263 | 62.376 |         |        | STY4263 | 7.8   |         |
| ATGTTGG + | STY1921 | 100    | STY0787 | 83     | STY1921 | 98.9  | STY0787 |
|           | STY4813 | 60.784 | STY2275 | 58.182 | STY2275 | 19.81 | STY4813 |
| ATGGCGC - | STY2094 | 100    |         |        | STY2094 | 98.4  |         |
|           | STY0727 | 58.095 |         |        | STY0727 | 10.55 |         |
|           | STY3817 | 63.462 | STY2620 | 62.136 | STY3817 | 38.73 | STY4123 |
| ATGGACC + | STY2878 | 100    | STY3943 | 66.055 | STY2878 | 96.56 | STY0853 |
| ATGTCTG - | STY3227 | 100    |         |        | STY3227 | 99.3  |         |
| ATGACCA + | STY0448 | 100    | STY0526 | 63     | STY0448 | 98.4  | STY2034 |
| ATGCGTT - | STY3325 | 100    | STY4892 | 89     | STY3325 | 98.5  | STY4892 |
| ATGATCG + | STY2953 | 100    | STY3067 | 72.816 | STY2953 | 98.4  | STY3067 |
| ATGGCAC + | STY0286 | 100    | STY0287 | 100    | STY0286 | 58.03 | STY0287 |
| ATGAGCA + | STY4887 | 100    | STY2431 | 57.843 | STY4887 | 98    | STY2431 |
| ATGCTAA + | STY3118 | 100    | STY2586 | 66.019 | STY3118 | 98.3  | STY2586 |
|           | STY2884 | 92     | STY3700 | 92     | STY2884 | 50.56 | STY3700 |
| ATGGAGA - | STY0419 | 100    | STY2331 | 59.804 | STY0419 | 99.4  | STY2331 |
| ATGATGT - | STY0481 | 100    | STY1965 | 75     | STY0481 | 98.5  | STY1965 |
| GTGATTG - | STY3145 | 100    | STY4688 | 61.905 | STY3145 | 100   | STY4688 |
| ATGTTTG + | STY4784 | 100    | STY4772 | 73     | STY4784 | 99.3  | STY4772 |
| ATGCTAA - | STY1558 | 100    | STY1670 | 61.111 | STY1558 | 97.9  | STY3424 |
| GTGGATT + | STY3649 | 100    | STY3749 | 69     | STY3649 | 94.1  | STY3158 |
| ATGAGTG + | STY2960 | 100    | STY3494 | 75     | STY2960 | 99.5  | STY3494 |
|           | STY4270 | 80     | STY4182 | 56     | STY4270 | 21    | STY4182 |
| ATAGGCC - | STY0384 | 100    | STY0385 | 68     | STY0384 | 33.65 | STY3577 |
| ATGAGTG - | STY2949 | 100    | STY4405 | 86     | STY2949 | 92.22 | STY0826 |
| ATGATCA(- | STY2425 | 100    | STY3155 | 78.218 | STY2425 | 98.8  | STY3155 |

|           |         |        |          |        |         |       |         |
|-----------|---------|--------|----------|--------|---------|-------|---------|
| ATGAGTC - | STY2463 | 100    | STY3342  | 65.094 | STY2463 | 99.1  | STY3342 |
| ATAGCTA + | STY2369 | 100    | STY3937  | 61     | STY2369 | 98.1  | STY3937 |
| ATGAATC - | STY2402 | 100    | STY0824  | 61.765 | STY2402 | 99.4  | STY0824 |
| ATGAAAA - | STY2439 | 100    | STY3925  | 80     | STY2439 | 99.1  | STY3925 |
| ATGAAAA + | STY2371 | 100    | STY2657  | 65     | STY2371 | 99    | STY3268 |
| ATGACTC - | STY2405 | 100    | STY0717  | 55     | STY2405 | 99.3  | STY0717 |
| ATGAAGC - | STY4127 | 100    | STY1750  | 65.347 | STY4127 | 99.6  | STY1409 |
| ATGCAGT + | STY0926 | 100    |          |        | STY0926 | 99.4  |         |
| ATGAGCG + | STY4726 | 100    | STY3958  | 63.107 | STY4726 | 98.9  | STY3958 |
| ATGCGTT + | STY4347 | 100    | STY1865  | 66.981 | STY4347 | 98.4  | STY1865 |
| TTGTTTG + | STY4719 | 100    | STY0996  | 72     | STY4719 | 99.5  | STY0996 |
| ATGGCAA - | STY3460 | 100    | STY2145  | 64     | STY3460 | 97.3  | STY2145 |
| ATGACCC + | STY4930 | 100    | STY0455  | 63     | STY4930 | 97.9  | STY0455 |
| ATGTACG - | STY2946 | 100    | STY2564  | 61     | STY2946 | 99.5  | STY1789 |
| ATGACGA + | STY2449 | 100    | STY1470  | 58.416 | STY2449 | 98.9  | STY1470 |
| ATGATGA + | STY3267 | 100    | STY1927  | 61     | STY3267 | 99.4  | STY1927 |
| ATGATTC + | STY3217 | 100    | STY0013  | 58.416 | STY3217 | 88.1  | STY0013 |
| ATGAGCG + | STY0797 | 100    | STY3049  | 61.386 | STY0797 | 96.6  | STY4166 |
| ATGGCAT + | STYrarB | 100    | STY0577  | 64.356 | STYrarB | 99    | STY2841 |
| GTGAAAC - | STY3198 | 100    | STY3763  | 63.107 | STY3198 | 99    | STY3763 |
| ATGAAGG + | STY3450 | 100    |          |        | STY3450 | 99.3  |         |
| ATGCACG + | STY0840 | 100    | STY3722  | 75.962 | STY0840 | 99.8  | STY3722 |
| ATGAGTA - | STY0891 | 100    | STY3132  | 78     | STY0891 | 99.5  | STY0716 |
| ATGACGC + | STY1737 | 100    | STY2546  | 64.078 | STY1737 | 98.5  | STY1623 |
| GTGAGCA + | STY3411 | 100    |          |        | STY3411 | 100   |         |
|           | STY2167 | 100    | STY4190  | 56.731 | STY2167 | 73.3  | STY4190 |
| TTGGCGC + | STY3231 | 100    | STY3379  | 63.107 | STY3231 | 94.53 | STY3379 |
| ATGACCC - | STY0882 | 100    | STY3423  | 64     | STY0882 | 98.2  | STY3423 |
| ATGGCTG - | STY0410 | 100    | STY4811  | 60.952 | STY0410 | 99    | STY4811 |
| ATGATGA + | STY0488 | 100    | HCM2.009 | 88     | STY0488 | 100   | STY1505 |
|           | STY3132 | 64.706 | STY2023  | 62.5   | STY4050 | 2.98  | STY3132 |
|           | STY2881 | 78     | STY3703  | 78     | STY4600 | 68    | STY2881 |
|           | STY0831 | 61.386 | STY4768  | 58.095 | STY0831 | 17.69 | STY4768 |
| ATGATGA + | STY4695 | 98     | STY2804  | 59.615 | STY4695 | 73.98 | STY2804 |
|           | STY4386 | 58.654 | STY1855  | 55     | STY4386 | 53.8  | STY1855 |
| ATGCTTG - | STY4683 | 100    | STY0308  | 60.396 | STY4683 | 99.4  | STY0308 |
| ATGATTA - | STY4700 | 100    | STY2405  | 56.311 | STY4700 | 99.2  | STY2405 |
| ATGTCAT - | STY3022 | 100    | STY1704  | 59.434 | STY3022 | 99.8  | STY1704 |
| ATGATGA + | STY1905 | 100    | STY2569  | 60.396 | STY1905 | 98.5  | STY0522 |
| ATGACGT - | STY4614 | 100    | STY3688  | 88     | STY4614 | 90.6  | STY3688 |
| GTGACAA - | STY2319 | 100    | STY3413  | 54.369 | STY2319 | 99.1  | STY3413 |
| ATGCCGC - | STY4198 | 100    |          |        | STY4198 | 99.4  |         |
| ATGGCAC - | STY3482 | 100    | STY0112  | 55.446 | STY3482 | 100   | STY0112 |
| ATGAGCA + | STY3266 | 100    | STY4252  | 46.226 | STY3266 | 99.3  | STY4252 |
| ATGGCAC - | STY3208 | 100    | STY1410  | 60.577 | STY3208 | 93.58 | STY1410 |
| ATGTCCA + | STY2096 | 100    | STY1744  | 76     | STY2096 | 98.6  | STY1744 |
| ATGAAAA + | STY1425 | 100    | STY4103  | 62.857 | STY1425 | 98.5  | STY4103 |
| ATGAAAA + | STY3542 | 99     | STY0860  | 69.231 | STY3542 | 98.1  | STY3543 |
| ATGGAAA - | STY2264 | 100    |          |        | STY2264 | 100   |         |
| ATGGATC + | STY0320 | 100    | STY4030  | 65.347 | STY0320 | 99.3  | STY0612 |
| GTGCCTC - | STY2662 | 100    |          |        | STY2662 | 98.7  |         |
|           | STY2359 | 45     |          |        | STY2359 | 3.01  |         |



|           |          |        |          |        |          |       |          |
|-----------|----------|--------|----------|--------|----------|-------|----------|
| ATGAAAA-  | STY2730  | 99     | STY0573  | 71     | STY2730  | 90.37 | STY0573  |
| ATGGAAA-  | STY2763a | 100    |          |        | STY2763a | 97.7  |          |
| ATGATCG-  | STY2611  | 100    | STY2891  | 63.208 | STY2611  | 99.6  | STY2891  |
| ATGATCT-  | STY2638  | 100    | STY4173  | 65.347 | STY2638  | 99.6  | STY4173  |
| ATGCCGT+  | STY1282  | 100    | STY0242  | 55.769 | STY1282  | 99.1  | STY0242  |
| ATGCATA-  | STY0686  | 100    |          |        | STY0686  | 98.8  |          |
| ATGAAAA+  | STY0726  | 100    | STY0367  | 67.327 | STY0726  | 99.1  | STY0667  |
| ATGAAAA-  | STY2596  | 100    | STY0635  | 62.5   | STY2596  | 99.1  | STY0635  |
|           | STY2393  | 62.5   |          |        | STY2393  | 10.72 |          |
|           | STY0347  | 60.784 | STY1248  | 55.446 | STY0347  | 30.8  | STY1248  |
|           | STY3236  | 61.386 | STY0689  | 41     | STY3236  | 21.69 | STY0689  |
|           | HCM2.005 | 52     | STY2972  | 38     | HCM2.005 | 9.5   | STY2972  |
|           | STY0882  | 60.577 | STY3563  | 60.194 | STY0930  | 9.66  | STY0882  |
|           | STY3474  | 63     | STY4427  | 60.55  | STY3474  | 39.39 | STY4427  |
|           | STY3184  | 77.451 | STY0084  | 60     | STY3184  | 22.65 | STY0084  |
|           | HCM1.273 | 41.026 | STY0552  | 38.462 | HCM1.273 | 41.05 | STY0552  |
|           | STY4561  | 66     |          |        | STY4561  | 40.53 |          |
| ATGCCTA+  | STY0519  | 100    | STY2719  | 86     | STY0519  | 98.9  | STY3570  |
|           | STY0523  | 100    | STY4020  | 75     | STY0523  | 79.62 | STY4020  |
|           | STY0569  | 96     | STY4523  | 59     | STY0569  | 84.44 | STY4693  |
| TGGCCGT-  | STY0602a | 99     | STY3273  | 61.905 | STY0602a | 97.74 | STY2365  |
|           | STY0628  | 100    | STY2894  | 71     | STY0628  | 98.7  | STY2894  |
|           | STY0670  | 100    | STY0070  | 77     | STY0670  | 99.1  | STY0070  |
| ATGATTA-  | STY1498  | 100    |          |        | STY1498  | 100   |          |
| ATGAATG-  | STY1604  | 100    | STY3457  | 58.824 | STY1604  | 100   | STY3457  |
| ATGTCTG+  | STY1620  | 100    | STY0387  | 60.194 | STY1620  | 100   | STY1255  |
| ATGGCAA+  | STY1637  | 100    | STY1642  | 98     | STY1637  | 100   | STY3691  |
| ATGAGAC-  | STY2004  | 100    | STY0099  | 62.264 | STY2004  | 100   | STY2434  |
| ATGATTA(- | STY2035  | 100    | STY1052  | 94     | STY2035  | 100   | STY1052  |
| ATGGCCA+  | STY1614  | 100    | STY0533  | 66.346 | STY1614  | 100   | STY0533  |
| ATGTTTG(+ | STY1630  | 100    | STY2343  | 63.366 | STY1630  | 100   | STY3548  |
| ATGAAAA+  | STY1886  | 100    |          |        | STY1886  | 97.47 |          |
| ATGGCTC+  | STY1070  | 100    | STY2016  | 100    | STY1070  | 100   | STY2016  |
| ATGTTTC(+ | STY2046  | 100    | STY4838  | 53.922 | STY2046  | 100   | STY4838  |
| ATGAAAA-  | STY2062  | 100    | STY1023  | 71     | STY2062  | 100   | STY1023  |
| GTGATGA+  | STY1624  | 100    | STY4743  | 61.682 | STY1624  | 100   | STY4743  |
| ATGCTTA+  | STY1665  | 100    | STY2258  | 60.194 | STY1665  | 100   | STY2258  |
| ATGAGCA-  | STY1071  | 100    | STY2015  | 100    | STY1071  | 100   | STY2015  |
| ATGACTT(- | STY2040  | 100    | STY1047  | 98     | STY2040  | 100   | STY1047  |
| ATGTGCG-  | HCM1.194 | 100    | HCM1.249 | 100    | HCM1.194 | 100   | HCM1.249 |
| ATGATTA(+ | STY2072  | 100    | STY2241  | 62     | STY2072  | 100   | STY0762  |
| ATGAATG+  | STY1742  | 100    | STY2515  | 48     | STY1742  | 100   | STY2515  |
| ATGCCGAT- | STY2017  | 100    | STY1069  | 92     | STY2017  | 100   | STY1069  |
| ATGCCAA-  | STY2033  | 100    | STY1054  | 96     | STY2033  | 100   | STY1054  |
| ATGATAA(+ | STY3278  | 100    | STY1095  | 86     | STY3278  | 100   | STY0040  |
| ATGAACG+  | STY2074  | 100    |          |        | STY2074  | 100   |          |
| TTGGTTA(- | STY2352  | 100    | STY4879  | 65.094 | STY2352  | 100   | STY3957  |
| ATGAATA+  | STY4599  | 100    | STY0920  | 63.81  | STY4599  | 100   | STY0920  |
|           | STY4639  | 100    | STY3665  | 74     | STY4639  | 100   | STY3665  |
| ATGAGTC+  | STY4546  | 100    | STY3674  | 63.107 | STY4546  | 100   | STY3674  |
| ATGGCTA+  | STY4565  | 100    | STY1690  | 81     | STY4565  | 100   | STY4565  |
| ATGTCAG+  | STY4583  | 100    | STY0649  | 73     | STY4583  | 100   | STY0649  |

|           |         |        |           |        |           |       |          |
|-----------|---------|--------|-----------|--------|-----------|-------|----------|
| ATGATGA - | STY4600 | 100    | STY2881   | 75     | STY4600   | 100   | STY3703  |
| ATGGGGC + | STY4834 | 100    | STY4582   | 62.037 | STY4834   | 100   | STY4582  |
| ATGTCGA + | STY4922 | 100    | STY2572   | 54.902 | STY4922   | 100   | STY2572  |
| GTGATGC + | STY4480 | 100    | STY2473   | 70     | STY4480   | 100   | STY2473  |
| GTGGCTC + | STY4543 | 100    | STY0815   | 59     | STY4543   | 100   | STY4543  |
| ATGTTGA + | STY4756 | 100    | STY4755   | 69     | STY4756   | 100   | STY3614  |
| ATGGCTG - | STY4835 | 100    | STY0602a  | 66     | STY4835   | 100   | STY0602a |
| ATGACCA + | STY0194 | 100    | STY4224   | 72     | STY0194   | 97.8  | STY4426  |
| ATGGCGC + | STY0252 | 100    |           |        | STY0252   | 99.4  |          |
| ATGATCG + | STY1550 | 100    | STY3162   | 63     | STY1550   | 99.6  | STY2682  |
| ATGAAGA - | STY4491 | 100    | STY2904   | 71     | STY4491   | 98.8  | STY3354  |
| ATGTTGA - | STY2633 | 100    | STY1733   | 71     | STY2633   | 98.6  | STY3711  |
| ATGCCTG + | STY3906 | 100    |           |        | STY3906   | 99.7  |          |
| ATGTTCG + | STY3565 | 100    | HCM1.42   | 59.615 | STY3565   | 100   | HCM1.42  |
| ATGACGA + | STY2239 | 100    | HCM1.15c  | 65.049 | STY2239   | 98.3  | STY2239  |
| ATGATGA - | STY2221 | 100    | STY1910   | 63.107 | STY2221   | 98.9  | STY3457  |
| ATGAAAG + | STY0070 | 100    | STY0670   | 87     | STY0070   | 97.5  | STY0670  |
| ATGAATT + | STY3484 | 100    | STY3941   | 59.434 | STY3484   | 99.2  | STY0880  |
|           | STY1590 | 64.078 | STY1643   | 57.843 | STY1590   | 12.97 | STY1643  |
| ATGGGGA - | STY0110 | 100    | STY1227   | 62.136 | STY0110   | 98.3  | STY1227  |
| ATGTCAG + | STY0175 | 100    | STY3220   | 63.889 | STY0175   | 98.7  | STY3220  |
|           | STY2332 | 63     | STY3918   | 58     | STY2332   | 11.66 | STY3918  |
| ATGGCAT + | STY0230 | 100    | STY0230   | 66.038 | STY0230   | 98.7  | STY0230  |
| ATGATTG + | STY0265 | 100    | STY4398   | 60.952 | STY0265   | 99.3  | STY4398  |
| ATGACCA - | STY1536 | 100    | STY1467   | 66.667 | STY1536   | 75.02 | STY4876  |
| ATGCAAG - | STY0699 | 100    | STY0055   | 62     | STY0699   | 98.8  | STY4784  |
|           | STY1320 | 50     |           |        | STY1320   | 8.83  |          |
| GTGAAAA + | STY0756 | 100    | STY3340   | 61.818 | STY0756   | 100   | STY3340  |
| ATGTTGC + | STY4905 | 100    | STY4599   | 44     | STY4905   | 99.2  | STY4599  |
| GTGCTGC - | STY4620 | 100    | STY3682   | 89     | STY4620   | 90.41 | STY3682  |
|           | STY4673 | 71     | STY3485   | 66     | STY4673   | 46.28 | STY2605  |
| GTGGGC +  | STY4914 | 100    | STY0143   | 60.194 | STY4914   | 97.3  | STY0143  |
| GTGCAAT - | STY4941 | 100    | STY0026   | 76     | STY4941   | 98.58 | STY3920  |
|           | STY4822 | 64.706 | STY1911   | 59.804 | STY1911   | 23.04 | STY4822  |
|           | STY2248 | 71     | STY2755   | 63.107 | STY2248   | 56.4  | STY2755  |
|           | STY2529 | 57     | STY1981   | 52.427 | STY2529   | 9.09  | STY1981  |
| ATGGCAG + | STY4690 | 100    | STY4466   | 51     | STY4690   | 98.7  | STY4466  |
| ATGCGTA - | STY0357 | 100    | STY0438   | 59.804 | STY0357   | 99.2  | STY0438  |
|           | STY4577 | 63.462 | HCM2.005: | 61.165 | HCM2.005: | 40.03 | STY4117  |
| ATGATAG - | STY1102 | 100    | STY2634   | 55     | STY1102   | 100   | STY2634  |
| ATGTCGC + | STY1157 | 100    | STY3368   | 80.189 | STY1157   | 98.1  | STY3368  |
| ATGAAAA - | STY1194 | 100    | STY1330   | 61     | STY1194   | 98.8  | STY1330  |
| GTGGCAC + | STY1245 | 100    | STY0144   | 60.194 | STY1245   | 99.4  | STY4136  |
| ATGAAAA + | STY1104 | 100    | STY0825   | 71     | STY1104   | 98    | STY0825  |
| GTGAACC + | STY4397 | 99     | STY2803   | 60.784 | STY4397   | 97.3  | STY2803  |
| ATGGCAA + | STY4342 | 100    | STY1384   | 61.386 | STY4342   | 99.5  | STY1384  |
| ATGACAC - | STY4303 | 100    | STY4606   | 67     | STY4303   | 99.1  | STY0215  |
| GTGAGTA + | STY4270 | 100    | STY3978   | 67     | STY4270   | 95    | STY3978  |
| ATGAAAA + | STY0962 | 100    | STY1565   | 84     | STY0962   | 98.3  | STY1565  |
| ATGGAGC + | STY3865 | 100    | STY3387   | 52.83  | STY3865   | 97.4  | STY3387  |
| ATGTTGA - | STY3795 | 100    | STY3230   | 93     | STY3795   | 99.3  | STY4406  |

|           |          |        |         |        |          |       |         |
|-----------|----------|--------|---------|--------|----------|-------|---------|
|           | STY0883  | 69     | STY2314 | 62.963 | STY3222  | 13.15 | STY0883 |
| ATGTCGT + | STY2981  | 100    | STY2809 | 74.257 | STY2981  | 98.7  | STY2809 |
| GCGCAGC + | STY3042  | 100    | STY0184 | 65.385 | STY3042  | 52.32 | STY0184 |
| ATGGATC + | STY3759  | 100    | STY0646 | 66.99  | STY3759  | 99    | STY0646 |
| ATGAGTG - | STY2972  | 100    | STY3608 | 65.385 | STY2972  | 98.2  | STY2552 |
| TTGAAAA(- | STY3032  | 100    | STY3031 | 98     | STY3032  | 61.52 | STY3031 |
|           | STY4014  | 59.048 | STY3069 | 57.692 | STY3069  | 30.02 | STY4014 |
| ATGTTCA + | STY2652  | 100    | STY0651 | 63.107 | STY2652  | 100   | STY2653 |
| GTGACGC + | STY2718  | 100    | STY1286 | 65.714 | STY2718  | 98.5  | STY1286 |
|           | STY1115  | 84     | STY1760 | 64.356 | STY1115  | 74.71 | STY1760 |
| TTGTGCG + | STY3785  | 100    | STY0190 | 62.745 | STY3785  | 98.1  | STY0190 |
|           | STY3925  | 69.903 | STY2439 | 68     | STY2439  | 46.65 | STY3925 |
| TTGATCC + | STY4486  | 100    | STY4795 | 63.462 | STY4486  | 98.2  | STY4795 |
|           | STY0035  | 49     |         |        | STY0035  | 15.55 |         |
| ATGCCTC - | STY2658  | 100    | STY2122 | 59.406 | STY2658  | 98.8  | STY2122 |
| ATGCTGA - | STY1862  | 100    | STY1423 | 66.346 | STY1862  | 97.5  | STY0887 |
| ATGTCTG - | STY1588  | 100    | STY3710 | 62.136 | STY1588  | 99.2  | STY0644 |
|           | STY2756  | 100    | STY2758 | 75     | STY2756  | 85.47 | STY2760 |
| ATGAAAA + | STY0025  | 100    | STY0592 | 75.728 | STY0025  | 98.5  | STY0592 |
| ATGGCAA + | STY4729  | 100    | STY2855 | 62.5   | STY4729  | 98.6  | STY2855 |
| GTGCCAC + | STY4768  | 100    | STY2938 | 63.107 | STY4768  | 96.5  | STY4489 |
| ATGCGCA + | STY4775  | 100    | STY2696 | 66.99  | STY4775  | 96.62 | STY2696 |
| ATGAGTA - | STY2501  | 100    | STY2520 | 66.337 | STY2501  | 99.6  | STY2520 |
|           | STY4012  | 60.55  |         |        | STY4012  | 3.1   |         |
| ATGCAAC - | STY4874  | 100    | STY0899 | 71     | STY4874  | 98.8  | STY0899 |
| ATGACGA + | STY1170  | 100    | STY4205 | 48     | STY1170  | 98.83 | STY4205 |
| ATTAAAG(- | STY1777  | 100    | STY0808 | 58.879 | STY1777  | 99.5  | STY0808 |
| ATGGATA - | STY2587  | 100    | STY0438 | 72.277 | STY2587  | 90.68 | STY0438 |
| ATGCTGC - | STY1865  | 100    | STY0888 | 57.143 | STY1865  | 98.8  | STY0888 |
|           | STY3088  | 73     | STY3340 | 53.774 | STY3088  | 53.42 | STY3340 |
| ATGACCA - | STY1190  | 100    | STY2914 | 56     | STY1190  | 99.5  | STY2914 |
| ATGGCCG + | STY1835  | 100    |         |        | STY1835  | 98.7  |         |
| ATGAGTT + | STY1695  | 100    | STY1343 | 61.682 | STY1695  | 99.2  | STY1343 |
| ATGAAAT(- | STY1198  | 100    |         |        | STY1198  | 98.8  |         |
| ATGCAAA + | STY1820  | 100    | STY1935 | 63.366 | STY1820  | 92.36 | STY1935 |
| ATGAAAA - | STY3883  | 100    | STY4845 | 67     | STY3883  | 98.7  | STY4845 |
| ATGAACA - | STY1802  | 100    |         |        | STY1802  | 99.1  |         |
|           | STY4888  | 64.078 | STY4610 | 64     | STY4610  | 17.9  | STY3692 |
| ATGGCAA - | STY1673  | 100    | STY0181 | 61.905 | STY1673  | 99.1  | STY0181 |
| ATGACAT - | STY1750  | 100    | STY3124 | 71     | STY1750  | 99.6  | STY3124 |
| ATGTTTT(+ | STY1209  | 100    | STY0851 | 65.686 | STY1209  | 93.81 | STY2479 |
| ATGGAAA - | STY1704  | 99     | STY1570 | 62.376 | STY1704  | 97.9  | STY1570 |
| GTGCTCA + | STY3905  | 100    |         |        | STY3905  | 98.45 |         |
| ATGATTA(- | STY2839  | 100    | STY0973 | 85     | STY2839  | 99.5  | STY0973 |
| ATGACCA + | STY0261  | 100    | STY1250 | 63.725 | STY0261  | 98.1  | STY1250 |
| ATGTTGA + | STY0439  | 100    | STY1935 | 71.154 | STY0439  | 97.5  | STY1935 |
| GTGTTAA + | STY4406  | 100    | STY1281 | 62.5   | STY4406  | 99    | STY1281 |
| ATGAAGA - | STY4471  | 100    | STY0538 | 60.194 | STY4471  | 99.4  | STY0538 |
| ATGACGC - | STY1808  | 100    |         |        | STY1808  | 99    |         |
| ATGACCC - | STY1765  | 100    | STY3762 | 69.231 | STY1765  | 98.5  | STY3762 |
| ATGGTTC - | STY1683  | 100    | STY0697 | 72.816 | STY1683  | 98.8  | STY0697 |
|           | HCM2.008 | 54.455 | STY3555 | 53.333 | HCM2.008 | 17.73 | STY3555 |

|           |         |     |          |        |         |       |          |
|-----------|---------|-----|----------|--------|---------|-------|----------|
| GTGAAGA - | STY2307 | 100 | STY3633  | 80     | STY2307 | 99.2  | STY3633  |
| ATGAATC - | STY2817 | 100 | STY3143  | 63.208 | STY2817 | 98.2  | STY3143  |
| ATGCTCG + | STY0227 | 100 | STY0122  | 63.81  | STY0227 | 98.7  | STY4056  |
| ATGAACA + | STY0086 | 100 | STY3896  | 63     | STY0086 | 98.8  | STY3896  |
| ATGACGC + | STY0169 | 100 |          |        | STY0169 | 99.28 |          |
| ATGCAGC + | STY4190 | 100 | STY0801  | 61.905 | STY4190 | 98.9  | STY0801  |
| ATGAAAC + | STY4280 | 100 | STY3853  | 76     | STY4280 | 98    | STY2959  |
| ATGACAT - | STY2535 | 100 |          |        | STY2535 | 98.1  |          |
| ATGCAAT - | STY2765 | 100 | STY0008  | 63.366 | STY2765 | 99.1  | STY0008  |
| ATGCCGC - | STY0450 | 100 | STY4174  | 85.149 | STY0450 | 81.3  | STY4174  |
| ATGAAAA - | STY0606 | 100 | STY2627b | 84     | STY0606 | 98.1  | STY2627b |
| ATGGCTC - | STY4924 | 100 | STY3467  | 61     | STY4924 | 98.3  | STY3467  |
| ATGAACC + | STY4132 | 100 | STY2965  | 71     | STY4132 | 99.4  | STY2965  |
| ATGACGA + | STY4199 | 100 | STY0960  | 64.706 | STY4199 | 98.9  | STY0960  |
| ATGACCA + | STY4302 | 100 | STY0157  | 59.406 | STY4302 | 100   | STY0157  |
| ATGAGCA - | STY2520 | 100 | STY2501  | 66.667 | STY2520 | 99.8  | STY2501  |
| ATGACGC - | STY2738 | 100 | STY4046  | 82     | STY2738 | 99.3  | STY4046  |
| ATGTCGA + | STY2567 | 100 | STY3424  | 72     | STY2567 | 99.3  | STY3424  |
| ATGAAAA + | STY1023 | 100 | STY2062  | 70     | STY1023 | 99.6  | STY2062  |
| ATGAAAA + | STY0580 | 100 | STY4804  | 69     | STY0580 | 98.9  | STY4804  |
| ATGTTAA - | STY4766 | 100 | STY3460  | 61     | STY4766 | 99.2  | STY2332  |
|           | STY2048 | 91  | STY1725  | 62.617 | STY2048 | 48.5  | STY1725  |
| ATGAGTA + | STY3356 | 100 |          |        | STY3356 | 99.3  |          |
| ATGAAAA + | STY4312 | 100 | STY4636  | 73     | STY4312 | 99.6  | STY1014  |
| ATGTTCC - | STY2442 | 100 | STY3438  | 69     | STY2442 | 98.9  | STY4111  |
| ATGGCAT + | STY2507 | 100 | HCM2.012 | 82     | STY2507 | 98.5  | HCM2.012 |
| ATGCCTG - | STY2693 | 100 |          |        | STY2693 | 98.5  |          |
| ATGAACA - | STY3790 | 100 | STY3151  | 60.784 | STY3790 | 98.7  | STY3151  |
| ATGGCCA - | STY0733 | 100 | STY0655  | 88     | STY0733 | 100   | STY0655  |
| ATGACTT + | STY1882 | 100 | STY1412  | 85     | STY1882 | 95.01 | STY1412  |
| ATGGATT - | STY3009 | 100 |          |        | STY3009 | 99.2  |          |
| ATGAACG - | STY3884 | 100 | STY1101  | 61.538 | STY3884 | 99.3  | STY1101  |
| ATGGTCG + | STY0893 | 100 | STY2696  | 68.224 | STY0893 | 99.7  | STY2696  |
| ATGTCAG - | STY4333 | 100 | STY2615  | 63.462 | STY4333 | 98.6  | STY2615  |
| ATGGTTG - | STY4404 | 100 | STY0564  | 67.647 | STY4404 | 98.2  | STY0564  |
| GTGGAAT + | STY1388 | 100 | STY0259  | 63.81  | STY1388 | 99.3  | STY3338  |
| ATGGCAA + | STY4382 | 100 | STY4715  | 63.107 | STY4382 | 99.8  | STY4715  |
| ATGTTAA + | STY2414 | 100 | STY3402  | 66     | STY2414 | 99.5  | STY3402  |
| ATGTTTC - | STY1320 | 100 | STY0544  | 63.107 | STY1320 | 99    | STY0544  |
| GTGAGTT - | STY3712 | 100 | STY0006  | 65.049 | STY3712 | 99    | STY1619  |
| TTGCGCT - | STY2746 | 100 | STY4323  | 48     | STY2746 | 98.9  | STY4323  |
| ATGCTCA + | STY3144 | 100 | STY2668  | 67.327 | STY3144 | 99.01 | STY2668  |
|           | STY3013 | 100 | STY3014  | 100    | STY3014 | 57.41 | STY3013  |
| ATGAGCA - | STY2271 | 100 | STY1738  | 66.019 | STY2271 | 98.9  | STY0962  |
| ATGAATG - | STY3544 | 100 |          |        | STY3544 | 98.9  |          |
| ATGAATC - | STY0016 | 100 | STY1889  | 71     | STY0016 | 98.3  | STY1889  |
| ATGGAAT - | STY0609 | 99  | STY0348  | 48     | STY0609 | 98.4  | STY0348  |
| ATGAGTA + | STY0056 | 100 | STY0063  | 60     | STY0056 | 96.4  | STY3380  |
| ATGACAA + | STY0755 | 100 | HCM1.63c | 43     | STY0755 | 99.2  | HCM1.63c |
| ATGTCGC - | STY1398 | 100 |          |        | STY1398 | 97.6  |          |
| ATGAGTC + | STY3860 | 100 | STY3861  | 84     | STY3860 | 98.8  | STY3861  |
| ATGACTG - | STY2649 | 100 | STY3928  | 62.136 | STY2649 | 99    | STY3928  |

|            |         |        |         |        |         |       |          |
|------------|---------|--------|---------|--------|---------|-------|----------|
| ATGGGCA-   | STY2422 | 100    | STY3896 | 74     | STY2422 | 98.7  | STY3896  |
| ATGATTC(+) | STY1758 | 100    | STY2697 | 92     | STY1758 | 98.6  | STY1520  |
| ATGAAAA+   | STY1289 | 100    | STY1487 | 89     | STY1289 | 97.7  | STY1487  |
| GTGAGTG+   | STY1926 | 100    | STY1676 | 65     | STY1926 | 98.1  | STY1239  |
| ATGCGTT-   | STY3165 | 100    | STY0026 | 65.049 | STY3165 | 97.7  | STY0950  |
| ATGAGTT(-) | STY3100 | 100    | STY4097 | 75     | STY3100 | 99    | STY4097  |
| ATGCACT+   | STY3151 | 100    | STY0460 | 59.259 | STY3151 | 98.8  | STY0460  |
| ATGGAAT-   | STY3576 | 100    | STY3214 | 62.617 | STY3576 | 98.9  | STY3214  |
| ATGAAAA+   | STY4271 | 100    | STY2587 | 69.307 | STY4271 | 99    | STY2587  |
| ATGAAGA+   | STY0107 | 100    | STY1819 | 74.312 | STY0107 | 99.1  | STY1819  |
| ATGAAAC-   | STY3633 | 100    | STY2307 | 80     | STY3633 | 99.3  | STY2307  |
| ATGACGA-   | STY3654 | 100    | STY4776 | 62.617 | STY3654 | 98.9  | STY4776  |
| ATGGCTG+   | STY1298 | 100    | STY2308 | 77     | STY1298 | 99.7  | STY2308  |
| ATGGTTT(+) | STY3732 | 100    | STY0655 | 66.355 | STY3732 | 99.2  | STY2616  |
| ATGTCCC+   | STY1937 | 100    | STY1850 | 62.136 | STY1937 | 99.4  | STY1914  |
| ATGGCAA-   | STY0120 | 100    | STY2477 | 62.963 | STY0120 | 97.7  | STY2477  |
| ATGTTGA+   | STY1305 | 100    | STY4169 | 67.619 | STY1305 | 99.1  | STY0889  |
| ATGAAAT(-) | STY2396 | 100    | STY4134 | 62.857 | STY2396 | 99    | STY4134  |
|            | STY3579 | 100    | STY3771 | 79     | STY3579 | 98.5  | STY3771  |
| ATGGCAA+   | STY0641 | 100    | STY4170 | 63.725 | STY0641 | 98.1  | STY4170  |
| ATGCTTT(+) | STY1341 | 100    |         |        | STY1341 | 100   |          |
| GTGTCTC-   | STY1295 | 100    | STY4292 | 59.406 | STY1295 | 99.3  | STY4292  |
|            | STY1018 | 63.551 | STY1238 | 61.468 | STY1018 | 31.37 | STY4796  |
| ATGGCAA+   | STY1442 | 100    | STY1187 | 70.297 | STY1442 | 98.8  | STY1187  |
| ATGTTGA+   | STY1408 | 100    | STY4234 | 82     | STY1408 | 98.6  | STY4892  |
| TTGGCTA-   | STY1392 | 100    |         |        | STY1392 | 98.1  |          |
| ATGAAGC+   | STY0534 | 100    | STY0975 | 61.765 | STY0534 | 99.2  | STY0975  |
| ATGATTT(-) | STY0671 | 100    | STY0069 | 79     | STY0671 | 99.1  | STY0069  |
| ATGAAAA(+) | STY4043 | 100    | STY0171 | 73     | STY4043 | 98.8  | STY0171  |
| ATGAAAC-   | STY1484 | 100    | STY3380 | 85     | STY1484 | 99.2  | HCM2.003 |
| GTGGAAT+   | STY1334 | 100    | STY4304 | 64.078 | STY1334 | 99.8  | STY4304  |
| ATGCGTA+   | STY1457 | 100    | STY1778 | 58.824 | STY1457 | 97.2  | STY2240  |
| ATGAAAA+   | STY1502 | 100    | STY0266 | 64.078 | STY1502 | 98.5  | STY1471  |
| ATGGTTG-   | STY1472 | 100    |         |        | STY1472 | 88.96 |          |
| ATGGACA-   | STY1445 | 100    | STY3236 | 62     | STY1445 | 97.3  | STY3236  |
| ATGACGC+   | STY2089 | 100    | STY4777 | 62.857 | STY2089 | 99    | STY4777  |
| ATGGAAC-   | STY1351 | 100    | STY2801 | 50     | STY1351 | 91.54 | STY2801  |
| ATGTTGG+   | STY1343 | 100    | STY4291 | 62.376 | STY1343 | 99.4  | STY4291  |
| ATGTTTG(-) | STY2864 | 100    | STY4240 | 90     | STY2864 | 98.5  | STY4240  |
| ATGAACA-   | STY3179 | 100    | STY0409 | 51.852 | STY3179 | 99.1  | STY0409  |
|            | STY1555 | 63     | STY1520 | 62     | STY1520 | 34.54 | STY3444  |
| ATGAGCG-   | STY0472 | 100    | STY2985 | 70.874 | STY0472 | 98.8  | STY2182  |
| ATGGCCC+   | STY0499 | 100    | STY3597 | 68.317 | STY0499 | 99.4  | STY3597  |
|            | STY4500 | 67     | STY4684 | 67     | STY4684 | 21.01 | STY4500  |
| ATGCAGC-   | STY3206 | 100    | STY4805 | 60     | STY3206 | 98.7  | STY4805  |
| ATGTCAT(-) | STY4111 | 100    | STY2442 | 65     | STY4111 | 97.6  | STY2442  |
| GTGTATC-   | STY4007 | 99     | STY3236 | 61.165 | STY4007 | 92.25 | STY3236  |
| ATGAAAA+   | STY3116 | 100    |         |        | STY3116 | 95.91 |          |
| ATGACAG-   | STY3172 | 100    | STY4319 | 62.376 | STY3172 | 98.3  | STY4319  |
| ATGAATA(-) | STY3313 | 100    | STY0539 | 53.774 | STY3313 | 98.6  | STY0539  |
| ATGCTCA-   | STY4200 | 100    | STY1924 | 77     | STY4200 | 98.9  | STY1924  |
| ATGGCTA+   | STY3257 | 100    | STY3877 | 59.804 | STY3257 | 98.6  | STY3877  |

|           |          |        |          |        |          |       |          |
|-----------|----------|--------|----------|--------|----------|-------|----------|
| GTGATTG - | STY4103  | 100    | STY0068  | 64.423 | STY4103  | 99.1  | STY0174  |
| ATGTCTT + | STY4003  | 100    | STY3435  | 59.804 | STY4003  | 99.1  | STY3435  |
| ATGACTA - | STY2855  | 100    | STY2854  | 57     | STY2855  | 98.3  | STY2854  |
| ATGGCGC + | STY2390  | 100    | STY1730  | 74.257 | STY2390  | 99.5  | STY1730  |
| ATGGATA - | STY2291  | 100    | STY1499  | 65.686 | STY2291  | 99.2  | STY1499  |
| ATGCTGG - | STY2327  | 100    | STY4398  | 76     | STY2327  | 99.6  | STY4398  |
| ATGCTTA + | STY2400  | 100    | STY4021  | 59     | STY2400  | 98.9  | STY4021  |
| ATGTTCG + | STY4393  | 100    | STY1134  | 89     | STY4393  | 99.8  | STY4333  |
| ATGATGG - | STY4196  | 100    | STY1386  | 63.725 | STY4196  | 97.7  | STY1386  |
| ATGGCGC - | STY1941  | 100    | STY3163  | 55     | STY1941  | 99.1  | STY3163  |
| ATGAAGC - | STY4156  | 100    | STY2601  | 66     | STY4156  | 98.9  | STY2601  |
| ATGAACA - | STY4262  | 100    |          |        | STY4262  | 99.2  |          |
| ATGAGCA - | STY3505  | 100    | STY1901  | 59.406 | STY3505  | 98.4  | STY4303  |
| ATGCAGC + | STY4818  | 100    | STY2479  | 61.765 | STY4818  | 98.7  | STY2479  |
| GTGCAAC - | STY4681  | 100    | STY2096  | 61.538 | STY4681  | 99.5  | STY2096  |
| ATGACGC - | STY3488  | 100    |          |        | STY3488  | 99.7  |          |
| ATGCACA - | STY3427  | 100    | STY3652  | 66     | STY3427  | 98.8  | STY3652  |
| ATGCGGA - | STY3317  | 100    | STY2868  | 62.745 | STY3317  | 98.6  | STY1527  |
| ATGAATC + | STY2956  | 100    | STY1234  | 60     | STY2956  | 99    | STY2401  |
|           | STY4821  | 66     | STY4803  | 59.615 | STY4821  | 40.02 | STY3992  |
| GTGAAAT - | STY2429  | 100    | STY3583  | 58.416 | STY2429  | 88.49 | STY3583  |
| ATGAGTA + | STY2432  | 100    | STY3994  | 67.327 | STY2432  | 99.5  | STY3994  |
|           | STY2501  | 62.857 | STY4307  | 62.5   | STY4307  | 29.75 | STY2468  |
| ATGAGCA - | STY2441  | 100    | STY1785  | 66.337 | STY2441  | 99.6  | STY1785  |
| ATGGCTA + | STY4394  | 100    | STY2684  | 61.165 | STY4394  | 98.9  | STY4936  |
| ATGGGTC + | STY4364  | 100    | STY4750  | 68.868 | STY4364  | 100   | STY4750  |
| ATGCTGA - | STY3182  | 100    | STY4047  | 59.223 | STY3182  | 97.7  | STY4047  |
| ATGAGTC + | STY0907  | 100    | STY2644  | 64.151 | STY0907  | 98.9  | STY2644  |
| ATGACCT + | STY3377  | 100    |          |        | STY3377  | 98.7  |          |
| ATGCCTG + | STY3244  | 100    | STY3160  | 77     | STY3244  | 99.5  | STY3160  |
| ATGATGA + | STY1101  | 100    | STY2869  | 65.686 | STY1101  | 98.8  | STY2869  |
| ATGTCGC + | STY0838  | 99     | STY4428  | 63     | STY0838  | 97.7  | STY4428  |
| ATGCTTA + | STY0889  | 100    | STY4169  | 66     | STY0889  | 98.58 | STY1305  |
| ATGCAAA - | STY1121  | 100    | STY4444  | 54.369 | STY1121  | 98.5  | STY1864  |
| GTGACTG + | STY0791  | 100    | STY3332  | 70.874 | STY0791  | 99.3  | STY3332  |
| ATGGCTC + | STY0827  | 100    | STY3747  | 65     | STY0827  | 99.3  | STY4091  |
| ATGACGA - | STY0880  | 100    | STY0779  | 68.932 | STY0880  | 98.4  | STY0779  |
| ATGAGCC + | STY3511  | 100    | STY2717  | 80     | STY3511  | 98.7  | STY2717  |
| ATGCCAA - | STY4030  | 100    | STY2755  | 64     | STY4030  | 98.1  | STY2755  |
| ATGACAA + | STY2853  | 100    | STY4491  | 64.078 | STY2853  | 100   | STY3500  |
| ATGCAAG - | STY2619  | 100    | HCM2.010 | 53     | STY2619  | 99.2  | HCM2.010 |
| ATGATGA + | STY4436  | 100    | STY1356  | 54.369 | STY4436  | 100   | STY1356  |
| ATGCAGG + | STY4383  | 100    | STY1760  | 75.728 | STY4383  | 99.9  | STY1760  |
| ATGCGCC - | STY1369  | 100    | STY4168  | 63.725 | STY1369  | 98.5  | STY4168  |
| ATGAAGC + | STY0506  | 100    | STY2808  | 85     | STY0506  | 100   | STY2808  |
| GTGAACC + | STY3832  | 100    | STY1400  | 63     | STY3832  | 91.55 | STY4716  |
| ATGAAAA + | STY0761  | 100    | STY0322  | 57.282 | STY0761  | 99.5  | STY0322  |
| ATGGAGA + | STY3739a | 100    | STY4881  | 64.486 | STY3739a | 99.4  | STY4881  |
|           | STY0214  | 62.5   | STY2625  | 60.377 | STY2625  | 19.88 | STY0214  |
|           | STY1816  | 58.416 | STY3628  | 58.252 | STY3628  | 36.75 | STY1816  |
|           | STY2627a | 75     | STY0607  | 70     | STY0607  | 67.2  | STY2627a |
|           | STY4627  | 100    | STY3675  | 99     | STY4627  | 95.2  | STY3675  |

|           |         |        |         |        |         |       |         |
|-----------|---------|--------|---------|--------|---------|-------|---------|
| ATGGCGC-  | STY2088 | 100    | STY2037 | 72.549 | STY2088 | 99    | STY2595 |
|           | STY4618 | 96     | STY3684 | 93     | STY4618 | 50.51 | STY3684 |
|           | STY4633 | 95     | STY3669 | 86     | STY4633 | 83.08 | STY3669 |
| ATGTCTT-  | STY3782 | 100    | STY0474 | 59.223 | STY3782 | 99.2  | STY0474 |
| ATGGGTA-  | STY3056 | 100    | STY3115 | 57.547 | STY3056 | 99.7  | STY3115 |
| ATGAACC+  | STY1746 | 99     | STY1745 | 90     | STY1746 | 96.3  | STY1745 |
| GTGATAT.- | STY1756 | 100    | STY1385 | 42     | STY1756 | 98.7  | STY1385 |
| ATGCCTA-  | STY1675 | 100    | STY3765 | 63.725 | STY1675 | 76.04 | STY3765 |
| ATGTTCG-  | STY1077 | 98     | STY1883 | 74     | STY1077 | 96.9  | STY1883 |
| ATGGAAG-  | STY2701 | 100    | STY4439 | 59.804 | STY2701 | 99.7  | STY4439 |
| ATGGATT.+ | STY0182 | 100    | STY4134 | 67     | STY0182 | 97.2  | STY4134 |
| ATGGCTC+  | STY4408 | 96     |         |        | STY4408 | 96.1  |         |
| ATGGAAT+  | STY1988 | 99     | STY2422 | 62.376 | STY1988 | 97.7  | STY2422 |
| ATGACTA+  | STY1962 | 100    | STY4421 | 59     | STY1962 | 96.85 | STY1226 |
| GTGAATA-  | STY2081 | 100    | STY3199 | 58.095 | STY2081 | 98.4  | STY3199 |
| ATGAATC+  | STY1043 | 100    | STY0753 | 62.376 | STY1043 | 90.31 | STY4816 |
| ATGATTA/+ | STY2135 | 100    | STY2659 | 57.426 | STY2135 | 100   | STY1176 |
|           | STY1654 | 57.843 |         |        | STY1654 | 19.1  |         |
|           | STY1553 | 59.615 |         |        | STY1553 | 4.65  |         |
|           | STY3047 | 63.107 | STY3383 | 62.5   | STY3383 | 21.1  | STY3047 |
|           | STY1921 | 62.264 | STY0758 | 57.009 | STY1921 | 49.98 | STY0758 |
|           | STY4077 | 61.765 | STY4171 | 40     | STY4077 | 23.78 | STY4171 |
|           | STY1620 | 60.396 | STY1159 | 59.615 | STY1159 | 37.99 | STY1620 |
|           | STY0976 | 60     |         |        | STY0976 | 10.52 |         |
|           | STY2277 | 58.095 |         |        | STY2277 | 16.82 |         |
|           | STY2489 | 51.961 | STY4037 | 46.078 | STY2489 | 16.88 | STY4037 |
|           | STY3231 | 38.835 |         |        | STY3231 | 13.61 |         |
|           | STY0688 | 100    | STY0896 | 74     | STY0688 | 99.2  | STY0896 |
|           | STY2463 | 61.165 | STY3593 | 58.416 | STY2463 | 28.78 | STY3593 |
|           | STY0786 | 100    | STY1919 | 76     | STY0786 | 98.7  | STY1919 |
|           | STY3977 | 58.824 |         |        | STY3977 | 43.72 |         |
|           | STY1700 | 60     | STY2711 | 52     | STY1700 | 44.67 | STY2711 |
|           | STY2839 | 100    | STY3739 | 59.434 | STY2839 | 100   | STY3739 |
| ATGACAC+  | STY3071 | 100    |         |        | STY3071 | 100   |         |
| ATGGCAA-  | STY2060 | 100    |         |        | STY2060 | 100   |         |
| ATGAATC+  | STY2076 | 100    | STY3438 | 55     | STY2076 | 100   | STY3438 |
| ATGAAGA+  | STY3677 | 100    | STY4625 | 98     | STY3677 | 100   | STY4625 |
| ATGCAGA-  | STY3693 | 100    | STY2463 | 58.416 | STY3693 | 100   | STY2463 |
| TTGAACC+  | STY3949 | 100    | STY3761 | 63     | STY3949 | 100   | STY3761 |
| ATGGATT.- | STY3344 | 100    | STY1204 | 61.321 | STY3344 | 100   | STY1204 |
| ATGTATG+  | STY3663 | 100    | STY3487 | 50     | STY3663 | 100   | STY3487 |
| GTGGCG/+  | STY3679 | 100    | STY4623 | 94     | STY3679 | 100   | STY4623 |
|           | STY2888 | 100    | STY3696 | 100    | STY2888 | 100   | STY3696 |
| ATGTTTG/- | STY4036 | 100    |         |        | STY4036 | 100   |         |
| ATGAAAA/- | STY1555 | 100    | STY1520 | 60     | STY1555 | 100   | STY1520 |
| ATGCTGG-  | STY3645 | 100    | STY3913 | 56.311 | STY3645 | 100   | STY3913 |
| ATGACTA.+ | STY3673 | 100    | STY1241 | 53.922 | STY3673 | 100   | STY1241 |
| ATGGCAC+  | STY3689 | 100    | STY4613 | 100    | STY3689 | 100   | STY4613 |
| ATGAGTT+  | STY3919 | 100    | STY0372 | 65.049 | STY3919 | 100   | STY0592 |
| ATGCCAT.+ | STY0300 | 100    | STY3821 | 61.111 | STY0300 | 100   | STY3821 |

|           |          |        |          |         |          |
|-----------|----------|--------|----------|---------|----------|
| ATGTATA(+ | STY0346  | 100    |          | STY0346 | 100      |
| ATGAACA - | STY3675  | 100    | STY4627  | 100     | STY3675  |
| GTGAATT - | STY2882  | 100    | STY3702  | 100     | STY2882  |
| ATGCTGA - | STY3069  | 100    | STY1231  | 62.5    | STY3069  |
| ATGATAA,+ | STY0306  | 100    | STY1378  | 62      | STY0306  |
| ATGAGTA + | STY0348  | 100    | STY3744  | 89.109  | STY0348  |
| ATGACAC - | STY1016  | 100    | STY1016  | 66.667  | STY1016  |
|           | STY4142  | 100    |          |         | STY4142  |
| ATGAATC(- | STY4412  | 100    | STY0186  | 74      | STY4412  |
| ATGTAA(+  | STY4547  | 100    |          |         | STY4547  |
| ATGAGGA - | STY4823  | 100    | STY1009  | 59.615  | STY4823  |
| ATGGCGT + | STY4843  | 100    | STY3047  | 62.037  | STY4843  |
| ATGCAAA + | STY4143  | 100    | STY0736  | 64      | STY4143  |
| ATGAACG + | STY4588  | 100    | STY2592  | 63.366  | STY4588  |
| ATGTATA(- | STY4207  | 100    | HCM1.169 | 52      | STY4207  |
| TTGGGTC - | STY4512  | 100    | STY2317  | 58.252  | STY4512  |
| ATGCCAG + | STY4667  | 100    | STY4517  | 92      | STY4667  |
| GTGAGTT - | STY4810  | 100    | STY2933  | 62.264  | STY4810  |
| ATGTATA(+ | STY4837  | 100    | STY4841  | 64.078  | STY4837  |
| ATGACAA - | STY3551  | 100    | STY1981  | 65.049  | STY3551  |
|           | STY0317  | 64.151 | STY4890  | 58.824  | STY4890  |
| ATGGTTG - | STY0729  | 100    | STY4849  | 61.682  | STY0729  |
| ATGAAAA,+ | STY3956  | 100    | STY4158  | 72      | STY3956  |
|           | STY3820  | 71.569 | STY4126  | 64      | STY3820  |
| ATGCTTG - | STY2223  | 100    | STY0467  | 64      | STY2223  |
| ATGAATT - | STY3944  | 100    | STY2510  | 60      | STY3944  |
| ATGAAAG + | STY3926  | 100    | STY4130  | 56.311  | STY3926  |
| ATGCTGG + | STY3995  | 100    | STY2637  | 66.019  | STY3995  |
| ATGCCGC + | STY0089  | 100    | STY3244  | 62      | STY0089  |
| ATGAATA(+ | STY0149  | 100    | STY3971  | 60.784  | STY0149  |
| GTGGAG(+  | STY0185  | 100    | STY0106  | 67      | STY0185  |
| ATGATGG + | STY0140  | 100    |          |         | STY0140  |
| ATGAAAA(- | STY3525  | 100    | STY3017  | 59.223  | STY3525  |
| ATGTTGG + | STY3560  | 100    | STY4489  | 61      | STY3560  |
| ATGGCGT + | STY0695  | 100    | STY2282  | 58.824  | STY0695  |
| ATGATAA - | STY0710  | 100    | STY0920  | 62.745  | STY0710  |
| ATGGCAA + | STY0736  | 100    | STY0269  | 73      | STY0736  |
| TTGACTA(+ | STY0250  | 100    |          |         | STY0250  |
| ATGATGA + | STY1552  | 100    | HCM2.009 | 66      | STY1552  |
| ATGATGA - | STY2308  | 100    | STY1298  | 77      | STY2308  |
| GTGTTTA(+ | STY2338  | 100    | STY1961  | 62.963  | STY2338  |
| ATGACTA(+ | STY0276  | 100    | STY3338  | 68.317  | STY0276  |
| ATGAAAA(+ | STY0335  | 99     | STY3919  | 63      | STY0335  |
| ATGACAG + | STY2342  | 100    | STY3889  | 71      | STY2342  |
| ATGAGCC - | STY4624  | 99     | STY3678  | 95      | STY4624  |
|           | STY4774  | 60.784 | STY2955  | 60.396  | STY2955  |
|           | STY0322  | 64.815 | STY0762  | 59.048  | STY0762  |
| ATGGGAC - | STY2915  | 100    | STY2806  | 52.381  | STY2915  |
| GTGGCG(-  | STY1131  | 100    |          |         | STY1131  |
|           | STY2629  | 60.194 | STY0205  | 59.615  | STY1720  |
|           | STY2906  | 100    | STY3422  | 61.905  | STY2906  |
|           | HCM1.57c | 33     |          |         | HCM1.57c |



|           |         |        |         |        |         |       |          |
|-----------|---------|--------|---------|--------|---------|-------|----------|
| ATGAAAG + | STY4379 | 100    | STY1533 | 53     | STY4379 | 100   | STY1533  |
| ATGGTGC - | STY4331 | 100    | STY0721 | 75.728 | STY4331 | 99.7  | STY0721  |
| ATGGAAA + | STY4297 | 100    | STY2973 | 64     | STY4297 | 99.1  | STY2973  |
| ATGAAAA - | STY1126 | 100    |         |        | STY1126 | 98.8  |          |
| ATGGAGC - | STY1163 | 100    | STY2095 | 61.386 | STY1163 | 99.7  | STY2095  |
| ATGATGG - | STY1199 | 100    |         |        | STY1199 | 99.2  |          |
| ATGACAA + | STY1247 | 100    | STY0456 | 61.321 | STY1247 | 98.9  | STY0456  |
| ATGCTCA - | STY1893 | 100    | STY2481 | 81     | STY1893 | 97.7  | STY2481  |
| ATGTTTG + | STY1838 | 100    | STY3518 | 61     | STY1838 | 98.5  | STY3518  |
| ATGACGG + | STY0980 | 100    |         |        | STY0980 | 99.1  |          |
|           | STY1728 | 63.551 | STY2222 | 62.376 | STY1728 | 10.3  | STY2222  |
|           | STY1629 | 70     | STY0695 | 65.347 | STY2479 | 9.79  | STY3960  |
| ATGGCAA - | STY4441 | 100    | STY0619 | 60     | STY4441 | 98.9  | STY0619  |
| ATGAGCC + | STY4481 | 100    | STY3156 | 61.321 | STY4481 | 98.6  | STY3156  |
| ATGACAG - | STY3053 | 100    | STY3429 | 61.905 | STY3053 | 99.3  | HCM1.134 |
| GTGAAGC + | STY4419 | 100    | STY2555 | 63.81  | STY4419 | 95.32 | STY3472  |
| ATGGATA - | STY4468 | 100    | STY3150 | 66.346 | STY4468 | 99.3  | STY3749  |
| ATGAAAC + | STY4506 | 100    | STY2774 | 74     | STY4506 | 98.23 | STY1567  |
| ATGAAAC - | STY2609 | 100    | STY1236 | 72     | STY2609 | 98.7  | STY1236  |
| ATGGGAC - | STY2672 | 100    | STY1672 | 59.434 | STY2672 | 98.3  | STY1672  |
|           | STY1682 | 69     | STY3068 | 61.905 | STY1682 | 54.28 | STY3068  |
| ATGAGTA + | STY3843 | 100    | STY2778 | 69.608 | STY3843 | 98.7  | STY2778  |
|           | STY1632 | 75.248 | STY1333 | 47     | STY1632 | 42.75 | STY1333  |
| ATGTCCG - | STY4431 | 100    | STY1053 | 62.963 | STY4431 | 98.5  | STY1053  |
| TTGACAG + | STY3037 | 100    | STY0159 | 63.725 | STY3037 | 98.4  | STY0159  |
| ATGGCGT - | STY3078 | 100    |         |        | STY3078 | 97    |          |
|           | STY3986 | 59.048 | STY1231 | 52.941 | STY3986 | 15.73 | STY1231  |
| ATGATGC - | STY1798 | 100    | STY2396 | 61     | STY1798 | 99.4  | STY2396  |
| ATGATCA - | STY2702 | 100    | STY2568 | 68     | STY2702 | 99    | STY2568  |
| ATGGAAT - | STY1272 | 100    |         |        | STY1272 | 98.2  |          |
| ATGAATC + | STY1690 | 100    | STY2450 | 61.165 | STY1690 | 98.7  | STY2450  |
| ATGATAA + | STY2175 | 99     | STY4835 | 59     | STY2175 | 88.5  | STY4835  |
| ATGAAAA - | STY2482 | 100    | STY2373 | 65.094 | STY2482 | 100   | STY4286  |
|           | STY0389 | 48     |         |        | STY0389 | 5.21  |          |
| ATGAAAC + | STY4786 | 100    | STY4018 | 64.423 | STY4786 | 98.7  | STY4018  |
| ATGACCT - | STY2551 | 100    | STY2974 | 63.725 | STY2551 | 99.6  | STY1664  |
| ATGAGTA - | STY2578 | 100    | STY3610 | 59     | STY2578 | 98.6  | STY3610  |
| ATGACGG - | STY2163 | 100    | STY3641 | 62.136 | STY2163 | 99.3  | STY3641  |
|           | STY3086 | 78     | STY0026 | 72.115 | STY3086 | 27.42 | STY3176  |
| ATGAGCT + | STY2136 | 100    | STY4212 | 68     | STY2136 | 92.08 | STY4212  |
| ATGGATA + | STY1807 | 100    | STY0647 | 62.385 | STY1807 | 99.2  | STY0647  |
| ATGTCTG - | STY1674 | 100    |         |        | STY1674 | 98.2  |          |
| ATGAAAA - | STY3807 | 100    | STY3800 | 92     | STY3807 | 97.8  | STY0858  |
| ATGAACT + | STY2985 | 100    | STY2986 | 65     | STY2985 | 98.89 | STY2986  |
| GTGTCTA + | STY1670 | 100    | STY4211 | 73     | STY1670 | 99.2  | STY4211  |
| GTGCGAA + | STY2755 | 99     | STY4318 | 75     | STY2755 | 24.15 | STY3447  |
| ATGTCGC + | STY1764 | 100    | STY0305 | 61.321 | STY1764 | 99.5  | STY0305  |
| ATGAGCC + | STY1668 | 100    | STY2962 | 60.784 | STY1668 | 98    | STY2962  |
| ATGGCAA + | STY1692 | 100    | STY3891 | 67     | STY1692 | 99.3  | STY3891  |
| ATGTTAA - | STY1752 | 100    | STY0811 | 68     | STY1752 | 98.5  | STY4426  |
| ATGCTCA - | STY2990 | 100    | STY2991 | 100    | STY2990 | 53.01 | STY2991  |
| ATGTCCG + | STY1688 | 100    | STY0070 | 57.426 | STY1688 | 99.1  | STY0070  |

|           |         |        |          |        |         |       |          |
|-----------|---------|--------|----------|--------|---------|-------|----------|
| ATGTTTT/- | STY1585 | 100    | STY1584  | 57     | STY1585 | 99.7  | STY1584  |
|           | STY2297 | 86     | STY2292  | 61.165 | STY2297 | 64.75 | STY4631  |
| ATGGAAC + | STY3979 | 100    | STY3708  | 59.406 | STY3979 | 96.93 | STY3122  |
| ATGGCGA + | STY2840 | 100    | STY2233  | 62.745 | STY2840 | 99.4  | STY2233  |
| ATGGCGA + | STY0432 | 100    | STY4294  | 71     | STY0432 | 99    | STY0743  |
| ATGGCGT - | STY0272 | 100    | STY0558  | 74     | STY0272 | 98.7  | STY0558  |
| ATGAATG + | STY0117 | 100    | STY2341  | 58.824 | STY0117 | 99    | STY2341  |
| ATGAGTG - | STY0080 | 100    | STY3577  | 69.608 | STY0080 | 97.6  | STY3577  |
| ATGCAGG - | STY2158 | 100    | STY1285  | 64     | STY2158 | 98.8  | STY1285  |
| ATGCGTC + | STY1378 | 100    | STY2809  | 70     | STY1378 | 98.8  | STY2591  |
| ATGTCCG + | STY4249 | 100    | STY0848  | 60     | STY4249 | 98.9  | STY1292  |
| ATGCATC + | STY1574 | 100    | STY1575  | 63     | STY1574 | 99.3  | STY0225  |
| ATGGATA + | STY3989 | 100    | STY3804  | 70     | STY3989 | 99.3  | STY3892  |
| ATGTTGA + | STY0388 | 100    | STY3311  | 61.538 | STY0388 | 99.6  | STY3311  |
| ATGCAGC + | STY0455 | 100    | STY0689  | 79     | STY0455 | 98.6  | STY0689  |
| ATGTCAC + | STY4429 | 100    | STY4094  | 57.692 | STY4429 | 99.8  | STY4094  |
| GTGGCGC - | STY0112 | 100    | STY2180  | 64.423 | STY0112 | 98.7  | STY3550  |
| ATGACAG - | STY3421 | 100    | STY4173  | 72     | STY3421 | 94.22 | STY4173  |
| ATGACTA + | STY4315 | 100    | STY2973  | 75     | STY4315 | 98.2  | STY2973  |
| ATGCATT + | STY0378 | 100    | STY0375  | 66     | STY0378 | 98.6  | STY0375  |
| ATGGCGC - | STY2679 | 100    | STY2680  | 70.192 | STY2679 | 98.9  | STY2680  |
| ATGCCAG + | STY0553 | 100    | STY1258  | 70.755 | STY0553 | 99.6  | STY0938  |
| ATGTCGG - | STY0649 | 100    | STY4583  | 72.549 | STY0649 | 96.8  | STY4583  |
| ATGAGCC + | STY2844 | 100    | STY0772  | 62.376 | STY2844 | 98.7  | STY0772  |
| GTGAAGA + | STY3383 | 100    | STY0503  | 61.905 | STY3383 | 98.4  | STY0503  |
| ATGAAAG - | STY3430 | 100    | STY3855  | 66.019 | STY3430 | 98.53 | STY3855  |
| ATGACTG + | STY3459 | 100    | STY4816  | 63.107 | STY3459 | 97.01 | STY4816  |
|           | STY3947 | 59     | STY3179  | 57.282 | STY3179 | 20.91 | STY3947  |
| ATGGCTT + | STY1021 | 100    |          |        | STY1021 | 99.5  |          |
| ATGAGCC - | STY2774 | 100    | STY4506  | 75     | STY2774 | 98.4  | STY4506  |
| ATGACCC + | STY2793 | 100    | STY2474  | 61.538 | STY2793 | 98.3  | STY2474  |
| ATGAAGC - | STY0581 | 100    |          |        | STY0581 | 99.3  |          |
|           | STY0115 | 59.615 |          |        | STY0115 | 15.85 |          |
| ATGACAA - | STY4904 | 100    | STY0418  | 66.99  | STY4904 | 98.8  | STY2005  |
| ATGAAAA + | STY4088 | 100    | STY4088  | 59.615 | STY4088 | 98.4  | STY4088  |
| ATGTTGT - | STY2583 | 100    | STY0922  | 69.608 | STY2583 | 99.3  | STY0922  |
| ATGGGTA + | STY0012 | 100    | STY2785  | 68     | STY0012 | 99.3  | STY2785  |
| ATGCAAA - | STY1328 | 100    | STY2375  | 64.706 | STY1328 | 98.8  | STY2375  |
| ATGGCAA + | STY2934 | 100    | STY1266  | 68.317 | STY2934 | 99.3  | STY1573  |
| ATGGATT - | STY3821 | 100    | STY1168  | 65.049 | STY3821 | 99.4  | STY1168  |
| ATGATCA - | STY0697 | 100    | STY0611  | 65.686 | STY0697 | 98.8  | STY0611  |
| ATGGCGC + | STY2699 | 100    | STY0637  | 70.874 | STY2699 | 98.5  | STY0637  |
| ATGAATA - | STY3749 | 100    | STY3649  | 64.706 | STY3749 | 99.5  | STY4468  |
| ATGCAGG - | STY0812 | 100    |          |        | STY0812 | 99.4  |          |
| ATGACCT + | STY0802 | 100    | STY1770  | 68.627 | STY0802 | 98.5  | STY0221  |
| ATGAGCC + | STY2931 | 100    |          |        | STY2931 | 98.1  |          |
| ATGGCGC - | STY1771 | 100    | STY4311  | 66.019 | STY1771 | 100   | STY0493  |
| ATGGATA + | STY3559 | 100    | STY1266  | 62.963 | STY3559 | 99.4  | STY3504  |
| ATGTTTA - | STY0062 | 100    | STY0674  | 67     | STY0062 | 96.28 | STY0674  |
| ATGATGT + | STY0043 | 100    | STY3593  | 72     | STY0043 | 99.7  | STY3593  |
| ATGGGAC - | STY1880 | 97     | HCM2.010 | 50.495 | STY1880 | 87.04 | HCM2.010 |
| ATGACAG + | STY2212 | 100    | STY1980  | 82     | STY2212 | 98.8  | STY1980  |

|           |         |        |         |        |         |       |         |
|-----------|---------|--------|---------|--------|---------|-------|---------|
| ATGTCTG + | STY3910 | 100    | STY0181 | 65.138 | STY3910 | 100   | STY4090 |
| ATGCATC + | STY2254 | 100    |         |        | STY2254 | 98.9  |         |
| ATGCATG + | STY4508 | 100    | STY0661 | 62.5   | STY4508 | 98.1  | STY2773 |
| GTGAATA + | STY2117 | 100    | STY3755 | 61     | STY2117 | 99.3  | STY0721 |
| ATGGAAC + | STY3547 | 100    | STY0159 | 64     | STY3547 | 99.5  | STY3037 |
| ATGAGCA + | STY4077 | 100    | STY4078 | 62     | STY4077 | 97.1  | STY4078 |
| ATGAGTA + | STY4689 | 100    | STY1637 | 66.667 | STY4689 | 99.7  | STY1649 |
| ATGAAAC - | STY1178 | 100    | STY1060 | 60.194 | STY1178 | 100   | STY1060 |
| ATGAGTC - | STY3853 | 100    | STY4280 | 74     | STY3853 | 99.3  | STY4280 |
| ATGAACA - | STY3715 | 100    | STY0493 | 76     | STY3715 | 100   | STY0493 |
| ATGAAGA - | STY2671 | 99     |         |        | STY2671 | 98.8  |         |
| ATGGACA + | STY2249 | 100    | STY2258 | 60     | STY2249 | 90.94 | STY2596 |
| ATGATGA - | STY4495 | 100    | STY0259 | 68.932 | STY4495 | 99.2  | STY3270 |
| ATGGCGC - | STY3707 | 100    | STY1288 | 59.048 | STY3707 | 100   | STY2074 |
| ATGTACA + | STY2169 | 100    | STY4498 | 50     | STY2169 | 99.8  | STY4498 |
| ATGAAAT + | STY1337 | 100    | STY3749 | 79.208 | STY1337 | 99.4  | STY4468 |
| ATGCAAG + | STY4443 | 100    | STY1930 | 69     | STY4443 | 99    | STY3763 |
| ATGCAGC + | STY3500 | 100    | STY2853 | 62.745 | STY3500 | 98.3  | STY2853 |
| ATGAAAC + | STY0468 | 100    | STY0101 | 63.208 | STY0468 | 98.8  | STY0101 |
| ATGTTTG - | STY3583 | 100    | STY4915 | 62.376 | STY3583 | 98.7  | STY4915 |
| ATGTTGA - | STY3600 | 100    | STY3511 | 62.376 | STY3600 | 98.6  | STY1851 |
| ATGTTTT - | STY3617 | 100    | STY3344 | 33     | STY3617 | 99.2  | STY3344 |
| ATGTTCC + | STY4782 | 100    | STY0886 | 56.863 | STY4782 | 97.81 | STY0886 |
| ATGCCTG - | STY0006 | 100    | STY1009 | 66.337 | STY0006 | 98.8  | STY1009 |
| ATGATCG + | STY1221 | 100    |         |        | STY1221 | 99.1  |         |
| ATGAGTG + | STY2177 | 100    |         |        | STY2177 | 98.8  |         |
| ATGACGA - | STY3076 | 100    | STY4013 | 60.194 | STY3076 | 96.9  | STY4013 |
| ATGAAAA - | STY3138 | 100    | STY0166 | 62     | STY3138 | 99.2  | STY4377 |
| ATGTCTA + | STY3167 | 100    | STY3426 | 65.094 | STY3167 | 99.4  | STY3109 |
| ATGAAAT + | STY3781 | 100    | STY4277 | 67.647 | STY3781 | 99.8  | STY2326 |
| ATGACGC - | STY3587 | 100    | STY1278 | 64     | STY3587 | 99.3  | STY1278 |
| ATGCCGC + | STY1477 | 100    | STY0003 | 64.078 | STY1477 | 100   | STY4275 |
| ATGTTTA + | STY1518 | 100    |         |        | STY1518 | 97.8  |         |
| GTGCCAG - | STY1494 | 100    | STY0712 | 60.185 | STY1494 | 99.5  | STY0712 |
| ATGTATC - | STY1942 | 100    | STY1134 | 66     | STY1942 | 99.1  | STY1134 |
| ATGGAAA + | STY1974 | 100    | STY2342 | 88     | STY1974 | 98.7  | STY2342 |
| ATGAATA + | STY2095 | 100    | STY0883 | 66     | STY2095 | 99.1  | STY1163 |
| ATGCTGA + | STY2110 | 100    | STY0953 | 62.617 | STY2110 | 98.6  | STY0953 |
| ATGAACT - | STY0552 | 100    | STY0553 | 63     | STY0552 | 93.86 | STY4189 |
| GTGGCGC + | STY0578 | 100    | STY4111 | 76     | STY0578 | 97.96 | STY4111 |
|           | STY4203 | 62.745 | STY4424 | 60.396 | STY4424 | 15.53 | STY4203 |
| ATGAGCA - | STY1427 | 100    | STY0429 | 69.307 | STY1427 | 99.7  | STY0429 |
| ATGCTTA - | STY1513 | 100    | STY0442 | 65.686 | STY1513 | 97.7  | STY0442 |
| ATGAGCC + | STY1330 | 100    |         |        | STY1330 | 99.8  |         |
| ATGTTTA - | STY1286 | 100    | STY2718 | 65     | STY1286 | 99.1  | STY2718 |
| ATGGTCA - | STY1934 | 100    | STY1521 | 64     | STY1934 | 99    | STY0696 |
| GTGGCTC + | STY1981 | 100    | STY2338 | 64.151 | STY1981 | 92.92 | STY4389 |
| ATGTCTT - | STY1399 | 99     | STY3838 | 64.151 | STY1399 | 97.7  | STY2062 |
| ATGCTGT - | STY0525 | 100    | STY0460 | 61.165 | STY0525 | 97.9  | STY0460 |
| GTGGCGC + | STY3340 | 100    | STY0667 | 61.765 | STY3340 | 96.35 | STY0667 |
| ATGGGAA + | STY2876 | 100    | STY4193 | 63     | STY2876 | 98.7  | STY2938 |
| ATGACCC - | STY4888 | 100    | STY4889 | 74     | STY4888 | 90.46 | STY2448 |

|            |         |        |          |         |         |       |         |
|------------|---------|--------|----------|---------|---------|-------|---------|
| ATGGAGA -  | STY0425 | 100    |          | STY0425 | 92.3    |       |         |
| ATGTTTA/ - | STY3295 | 100    | STY0428  | 49.038  | STY3295 | 99.5  | STY0428 |
| TTGAAAA +  | STY2813 | 100    | STY3240  | 93      | STY2813 | 91.41 | STY4157 |
| ATGAAGT -  | STY2903 | 100    | STY2904  | 93      | STY2903 | 95.27 | STY0433 |
| TTGATAA/ - | STY3335 | 100    | STY3096  | 88      | STY3335 | 99.3  | STY0484 |
|            | STY0881 | 87     | STY0900  | 76      | STY0881 | 75.29 | STY0900 |
| ATGACAG +  | STY3976 | 100    | STY0043  | 70.588  | STY3976 | 98.7  | STY0043 |
| ATGACGC +  | STY2852 | 100    | STY0499  | 54      | STY2852 | 99.5  | STY0499 |
| ATGAGCA -  | STY4611 | 99     | STY1072  | 94      | STY1072 | 27.39 | STY2014 |
| ATGAGCG +  | STY2940 | 100    | STY2343  | 76.238  | STY2940 | 98.5  | STY2255 |
| ATGACGA +  | STY2928 | 99     | STY4776  | 84      | STY2928 | 97.7  | STY3549 |
| ATGATAT +  | STY4135 | 100    | STY2972  | 63.462  | STY4135 | 99.5  | STY2972 |
| ATGCTCG -  | STY4070 | 100    |          |         | STY4070 | 99    |         |
| ATGATTA(+  | STY3110 | 100    | STY1956  | 87      | STY3110 | 98.3  | STY1956 |
| ATGTCGC -  | STY3135 | 100    | STY3400  | 61.538  | STY3135 | 98.8  | STY0690 |
| ATGTTAA(+  | STY2418 | 100    | STY4284  | 58.654  | STY2418 | 98.9  | STY4284 |
| ATGATTT +  | STY2460 | 100    |          |         | STY2460 | 99.9  |         |
| ATGCCTG +  | STY2472 | 100    | STY1285  | 69.307  | STY2472 | 99.5  | STY1285 |
| ATGCGAA -  | STY1950 | 100    | STY4916  | 64.151  | STY1950 | 99    | STY4916 |
| ATGAGCA +  | STY4372 | 100    | STY0024  | 64.356  | STY4372 | 99.2  | STY0024 |
| ATGGGTA +  | STY0942 | 100    | STY4881  | 79.808  | STY0942 | 99.7  | STY4881 |
| ATGAAAC -  | STY0931 | 100    | STY3656  | 65.686  | STY0931 | 99    | STY3656 |
| ATGGCAG +  | STY4361 | 100    | STY0062  | 61.111  | STY4361 | 99.9  | STY0062 |
| ATGACCC +  | STY4705 | 100    | STY0967  | 66.667  | STY4705 | 99.5  | STY0967 |
| ATGCGTC +  | STY4747 | 100    | STY2522  | 67      | STY4747 | 99.5  | STY1676 |
| ATGACGC -  | STY3380 | 100    | STY0156  | 65      | STY3380 | 98.9  | STY2781 |
| ATGGATG -  | STY3300 | 100    | STY4865  | 70      | STY3300 | 99    | STY2168 |
| ATGGATA +  | STY4751 | 100    |          |         | STY4751 | 99    |         |
| ATGAAAC +  | STY4866 | 100    | STY4784  | 60      | STY4866 | 99.2  | STY4784 |
| ATGATAG -  | STY4684 | 100    | STY4500  | 67      | STY4684 | 99    | STY4500 |
| TTGAAAC/ - | STY0407 | 100    |          |         | STY0407 | 98.6  |         |
| ATGAACG +  | STY2373 | 100    | STY0758  | 65.714  | STY2373 | 99    | STY0758 |
| ATGACAT(+  | STY2455 | 100    | STY0887  | 78      | STY2455 | 99.4  | STY4171 |
| ATGCCAC +  | STY2465 | 100    | STY3539  | 55.14   | STY2465 | 99.1  | STY3539 |
| ATGTTTT/ - | STY2323 | 100    | STY1651  | 50      | STY2323 | 98.8  | STY1651 |
| ATGAACC -  | STY2399 | 100    | STY2282  | 86      | STY2399 | 98.8  | STY2282 |
| ATGACGC -  | STY4109 | 100    | STY1228  | 64.151  | STY4109 | 98.6  | STY4450 |
| ATGACGC -  | STY4195 | 100    | STY3455  | 65.094  | STY4195 | 99.5  | STY1567 |
| ATGATCC -  | STY4285 | 100    | STY2736  | 65      | STY4285 | 99.8  | STY2736 |
| ATGATTA(+  | STY3416 | 100    | STY0887  | 57.426  | STY3416 | 98.6  | STY0887 |
| ATGGAAA -  | STY2097 | 100    | STY0112  | 93      | STY2097 | 98.3  | STY0112 |
| ATGAAGG -  | STY1711 | 100    | STY2992  | 55.769  | STY1711 | 98.7  | STY2992 |
| ATGAAGT +  | STY0760 | 100    |          |         | STY0760 | 98.87 |         |
| ATGAAGT +  | STY0849 | 100    | STY4589  | 65.049  | STY0849 | 98.5  | STY4589 |
| ATGTCAT +  | STY1083 | 100    | STY0879  | 70      | STY1083 | 99.2  | STY0879 |
|            | STY1579 | 60.577 | STY4499  | 59.223  | STY4499 | 29.98 | STY2651 |
| ATGGACA +  | STY0841 | 100    | HCM1.169 | 60.952  | STY0841 | 98.2  | STY0843 |
|            | STY0014 | 40     |          |         | STY0014 | 7.74  |         |
| ATGGCTA +  | STY1738 | 100    | STY4503  | 69      | STY1738 | 99    | STY2271 |
| ATGGCGC +  | STY3410 | 100    | STY1572  | 62.617  | STY3410 | 99.7  | STY4490 |
| ATGAGTA -  | STY4738 | 100    | STY2323  | 65.686  | STY4738 | 98.3  | STY2323 |

|           |          |        |          |         |          |       |          |
|-----------|----------|--------|----------|---------|----------|-------|----------|
|           | STY2359  | 52.885 |          | STY2359 | 26.84    |       |          |
| ATGACAA - | STY1724  | 100    | STY0716  | 52.475  | STY1724  | 98.8  | STY0716  |
| ATGCGTT + | STY0411  | 100    | STY1921  | 55      | STY0411  | 97.7  | STY1921  |
| ATGAGTA - | STY2622  | 100    | HCM2.005 | 63      | STY2622  | 100   | STY2723  |
| GTGAAGA + | STY4325  | 98     | STY2751  | 46      | STY4325  | 97    | STY2751  |
| ATGAAAA - | STY2225  | 100    | STY0913  | 62.857  | STY2225  | 98.9  | STY0913  |
| ATGACTT + | STY0470  | 100    | STY2439  | 58.491  | STY0470  | 98.5  | STY2439  |
| ATGGCAC + | STY4749  | 100    | STY0795  | 59.406  | STY4749  | 99.1  | STY0795  |
| ATGAAAG + | STY4366  | 100    | STY1460  | 60.714  | STY4366  | 100   | STY1460  |
| ATGGCCA + | STY4788  | 100    | STY4947  | 61.905  | STY4788  | 99.6  | STY3630  |
| ATGAAAA + | STY0383  | 100    |          |         | STY0383  | 98.9  |          |
| ATGATCA + | STY3248  | 100    | STY2717  | 66      | STY3248  | 98.4  | STY2717  |
| ATGCGTA - | STY1200  | 99     | STY1032  | 64.078  | STY1200  | 98.4  | STY1032  |
| TTGCAAA - | STY3029  | 98     | STY3099  | 55.769  | STY3029  | 95.4  | STY3099  |
|           | STY0136  | 40.594 |          |         | STY0136  | 14.19 |          |
|           | STY1624  | 65     | STY2489  | 59.223  | STY1624  | 42.96 | STY2489  |
| ATGATCA - | STY4334  | 100    | STY3948  | 60.577  | STY4334  | 99.5  | STY3948  |
| ATGTCAT + | STY0490  | 100    | STY0577  | 49.505  | STY0490  | 99.8  | STY0577  |
| TTGTCTC + | STY1881  | 100    | STY2281  | 60.784  | STY1881  | 99.1  | STY2514  |
| GTGAGCA - | STY1824  | 100    | STY1965  | 59.406  | STY1824  | 99.5  | STY1965  |
| ATGACAA + | STY1821  | 100    | STY4014  | 89      | STY1821  | 98.8  | STY4014  |
| ATGAACA + | STY4908  | 100    | STY4907  | 74      | STY4908  | 98.9  | STY4733  |
| TTGGCTA - | STY3891  | 100    | STY1692  | 67      | STY3891  | 98    | STY1692  |
| ATGAAAA - | STY2079  | 100    | STY1148  | 86      | STY2079  | 98.6  | STY1148  |
| ATGAAAT + | STY4474  | 100    | STY1006  | 50.98   | STY4474  | 99.3  | STY1006  |
| ATGCCCT + | STY0770  | 99     | STY3422  | 52.475  | STY0770  | 97.1  | STY3422  |
| ATGCGCG + | STY2391  | 100    | STY0820  | 59      | STY2391  | 100   | STY0820  |
| GTGCCCA - | STY2559  | 100    | STY1521  | 58      | STY2559  | 100   | STY3145  |
| ATGAACA - | STY1938  | 100    | STY1921  | 56.881  | STY1938  | 99.4  | STY1921  |
|           | STY2761  | 62.136 |          |         | STY2761  | 18.06 |          |
|           | STY0958  | 71.845 | STY4451  | 64.356  | STY0793  | 7.76  | STY0958  |
|           | STY1761  | 61.386 | STY0587  | 60.194  | STY1761  | 29.11 | STY0587  |
|           | STY3182  | 77     | STY3183  | 74      | STY3182  | 39.84 | STY3183  |
|           | HCM2.001 | 60.396 | STY2649  | 55      | STY2649  | 11.85 | HCM2.001 |
|           | STY0381  | 62.5   | STY2971  | 59.804  | STY2971  | 17.64 | STY0381  |
|           | STY0793  | 63.393 |          |         | STY0793  | 24.09 |          |
|           | STY2248  | 41     |          |         | STY2248  | 5.69  |          |
|           | STY3917  | 60.784 | STY2170  | 60.185  | STY2170  | 4.14  | STY3917  |
|           | STY2807  | 100    | STY0750  | 84      | STY2807  | 98.9  | STY0750  |
| ATGTCAG - | STY0739  | 100    | STY3270  | 78      | STY0739  | 99.39 | STY3270  |
|           | STY1553  | 38     |          |         | STY1553  | 30.91 |          |
|           | STY0866  | 100    | STY1258  | 84.466  | STY0866  | 99.4  | STY0553  |
|           | STY1728  | 28     |          |         | STY1728  | 7.24  |          |
|           | STY0896  | 100    | STY0688  | 73      | STY0896  | 98.5  | STY0688  |
| ATGCAGA - | STY2044  | 100    | STY0412  | 63.063  | STY2044  | 100   | STY0412  |
| TTGGAGC - | STY3292  | 100    |          |         | STY3292  | 100   |          |
| ATGAGAC + | STY3661  | 100    | STY3151  | 78      | STY3661  | 100   | STY0073  |
| GTGGCTT - | HCM1.05c | 100    | HCM1.136 | 100     | HCM1.205 | 100   | HCM1.239 |
| ATGAGTG + | STY2884  | 100    | STY3700  | 100     | STY2884  | 100   | STY3700  |

|           |         |        |          |        |         |       |          |
|-----------|---------|--------|----------|--------|---------|-------|----------|
| TTGTTTG(- | STY0114 | 100    | STY4178  | 61.765 | STY0114 | 100   | STY3706  |
| ATGATTG(+ | STY2070 | 100    | STY2587  | 61     | STY2070 | 100   | STY2793  |
| ATGACAG(+ | STY2345 | 100    | STY0124  | 49     | STY2345 | 100   | STY0124  |
|           | STY2717 | 100    | STY3511  | 80     | STY2717 | 100   | STY3511  |
| ATGAGCC(- | STY2886 | 100    | STY3698  | 100    | STY2886 | 100   | STY3698  |
| ATGAAGG(+ | STY0159 | 100    | STY3037  | 64     | STY0159 | 100   | STY0277  |
| ATGGGTA(+ | STY0313 | 100    | STY0311  | 77     | STY0313 | 100   | STY0311  |
| ATGAACA(+ | STY2203 | 100    | STY1649  | 89     | STY2203 | 100   | STY1649  |
| ATGGGCC(- | STY2361 | 100    | STY3220  | 51     | STY2361 | 100   | STY3220  |
| ATGACAA(- | STY2879 | 100    | STY4562  | 58.824 | STY2879 | 100   | STY4562  |
| ATGAAGG(- | STY3067 | 100    | STY1918  | 63.366 | STY3067 | 100   | STY2753  |
| ATGATGA(- | STY1592 | 100    | STY3382  | 58.416 | STY1592 | 100   | STY3382  |
| ATGAACT(+ | STY1609 | 100    |          |        | STY1609 | 100   |          |
| ATGGCTG(- | STY2363 | 100    | STY2275  | 59.406 | STY2363 | 100   | STY2275  |
| ATGAACA(+ | STY3762 | 100    | STY3763  | 67     | STY3762 | 100   | STY2926  |
|           | STY4106 | 100    | STY4824  | 63.81  | STY4106 | 100   | HCM2.001 |
| ATGATTA(- | STY1594 | 100    |          |        | STY1594 | 100   |          |
| GTGTGGC(+ | STY1611 | 100    | STY2966  | 68.317 | STY1611 | 100   | STY2966  |
| GTGAGTC(+ | STY1627 | 100    | HCM2.009 | 64.706 | STY1627 | 100   | HCM2.009 |
|           | STY4616 | 100    | STY3686  | 93     | STY4616 | 100   | STY3686  |
| ATGGCTA(+ | STY4523 | 100    |          |        | STY4523 | 100   |          |
| ATGAAAC(+ | STY4558 | 100    | STY4741  | 63.208 | STY4558 | 100   | STY4769  |
| ATGAAAC(+ | STY4575 | 100    | STY1004  | 57     | STY4575 | 100   | STY0205  |
| ATGAACA(+ | STY4592 | 100    | STY3948  | 65.741 | STY4592 | 100   | STY3948  |
| GTGAACA(- | STY4617 | 100    | STY3685  | 92     | STY4617 | 100   | STY3685  |
| ATGGTTC(+ | STY4852 | 100    | STY2758  | 56.311 | STY4852 | 100   | STY2758  |
|           | STY4626 | 100    | STY3676  | 94     | STY4626 | 100   | STY3676  |
| ATGGATA(+ | STY4650 | 100    | STY4856  | 87     | STY4650 | 100   | STY4856  |
| GTGGAGT(+ | STY4553 | 100    | STY4800  | 61     | STY4553 | 100   | STY4800  |
| GTGATGC(+ | STY4572 | 100    | STY2263  | 49.505 | STY4572 | 100   | STY2263  |
| GTGTTAT(+ | STY4589 | 100    | STY4086  | 79     | STY4589 | 100   | STY4086  |
| ATGATTC(- | STY0198 | 100    |          |        | STY0198 | 98.7  |          |
| ATGCGTG(- | STY0271 | 100    | STY1975  | 62.5   | STY0271 | 99.3  | STY4417  |
| ATGAAAA(- | STY1532 | 100    | STY1649  | 80     | STY1532 | 37.19 | STY1002  |
| ATGAGTG(- | STY1332 | 100    | HCM1.195 | 62.376 | STY1332 | 99.2  | HCM1.195 |
| ATGGCTA(+ | STY3928 | 100    | STY1236  | 62.136 | STY3928 | 97.5  | STY0815  |
| ATGACCA(+ | STY3889 | 100    | STY2342  | 72     | STY3889 | 98.9  | STY2342  |
| GTGTCAT(+ | STY4927 | 100    | STY0197  | 73.267 | STY4927 | 98.5  | STY0197  |
| GTGAATG(- | STY2231 | 100    | STY1808  | 72     | STY2231 | 98    | STY1808  |
| ATGGCAA(+ | STY4350 | 100    | STY2283  | 63     | STY4350 | 100   | STY2283  |
| ATGAAAC(+ | STY2688 | 100    | STY3378  | 61.165 | STY2688 | 96.9  | STY4138  |
| ATGGCAA(+ | STY3498 | 100    | STY0852  | 71.287 | STY3498 | 99.2  | STY1573  |
| GTGAAAA(- | STY3538 | 100    | STY0852  | 74     | STY3538 | 99.7  | STY0852  |
| ATGGTCG(+ | STY0155 | 100    | STY3900  | 72.816 | STY0155 | 85.71 | STY0780  |
| ATGTTAC(+ | STY0190 | 100    | STY2816  | 61.538 | STY0190 | 99.3  | STY3349  |
| ATGCTAT(- | STY0212 | 100    | STY0544  | 62.376 | STY0212 | 98.3  | STY0544  |
| ATGCTGA(+ | STY0246 | 100    | STY4493  | 64.706 | STY0246 | 99.6  | STY4493  |
| ATGACAC(- | STY1554 | 100    | STY0235  | 60.577 | STY1554 | 98.99 | STY4194  |
| ATGGCAT(+ | STY1525 | 100    | STY1914  | 80     | STY1525 | 98.7  | STY1914  |
|           | STY0815 | 63.107 | STY2479  | 60.577 | STY2479 | 7.29  | STY3960  |
|           | STY0739 | 100    | STY3270  | 80     | STY0739 | 60.3  | STY3270  |
|           | STY1961 | 66.337 | STY4016  | 65     | STY4016 | 49.02 | STY1961  |

|            |         |        |          |        |         |       |          |
|------------|---------|--------|----------|--------|---------|-------|----------|
| ATGTATT(-  | STY2366 | 100    | STY4859  | 62.136 | STY2366 | 97.8  | STY4859  |
|            | STY4636 | 94     | STY3667  | 90     | STY4636 | 80.5  | STY3667  |
|            | STY0103 | 63.366 |          |        | STY0103 | 8.41  |          |
| ATGCCTA +  | STY4925 | 100    | STY2431  | 82     | STY4925 | 99    | STY2431  |
| ATGAAGG -  | STY0281 | 100    | STY1758  | 87     | STY0281 | 99.6  | STY1758  |
| ATGTACC +  | STY0355 | 100    | STY3449  | 64.545 | STY0355 | 99.5  | STY3449  |
|            | STY0950 | 62     | STY0159  | 58     | STY0950 | 21.81 | STY0277  |
| ATGAGAG +  | STY1094 | 100    | STY0931  | 60.577 | STY1094 | 99.2  | STY0931  |
| ATGGATA +  | STY1572 | 100    | STY1570  | 67.327 | STY1572 | 98.9  | STY1570  |
|            | STY0399 | 52.941 | STY1965  | 46.078 | STY0399 | 16.56 | STY1965  |
| GTGATGC +  | STY1080 | 100    | STY0190  | 62.037 | STY1080 | 99.1  | STY0190  |
| ATGCTGA +  | STY1667 | 100    | STY4410  | 91     | STY1667 | 98.9  | STY4410  |
| ATGAATG +  | STY1174 | 100    | STY0919  | 68.224 | STY1174 | 100   | STY0919  |
| ATGCCCC -  | STY1228 | 100    | STY3551  | 63.107 | STY1228 | 96.23 | STY3551  |
|            | STY1255 | 100    | STY1748  | 72.277 | STY1255 | 80.72 | STY1748  |
| ATGACTG +  | STY1663 | 100    | HCM1.252 | 68     | STY1663 | 99.7  | HCM1.252 |
| ATGGATA +  | STY4374 | 100    | STY0289  | 62     | STY4374 | 99.7  | STY0289  |
| ATGGCAA +  | STY4328 | 100    | STY1811  | 81     | STY4328 | 98.9  | STY1811  |
| ATGCAAT -  | STY4291 | 100    | STY1343  | 60     | STY4291 | 99.1  | STY3656  |
|            | STY2501 | 56     | STY2509  | 54.808 | STY2501 | 38.36 | STY2509  |
| ATGAGTG +  | STY0994 | 100    | STY1778  | 90     | STY0994 | 99.4  | STY1778  |
| ATGAAGC +  | STY3817 | 100    | STY2875  | 94.059 | STY3817 | 98.7  | STY2875  |
| ATGAAAG -  | STY3765 | 100    | STY0040  | 77     | STY3765 | 98.2  | STY0040  |
| ATGAAAC -  | STY3746 | 100    |          |        | STY3746 | 98.3  |          |
| ATGATGT +  | STY3027 | 100    |          |        | STY3027 | 99.1  |          |
|            | STY3067 | 75     | STY2909  | 52     | STY3067 | 41.92 | STY2909  |
| ATGTATC, + | STY3756 | 100    | STY3825  | 68     | STY3756 | 96.4  | STY2241  |
|            | STY4554 | 55.882 | STY3502  | 41.748 | STY4554 | 6.25  | STY3502  |
| ATGGAGT -  | STY3045 | 100    |          |        | STY3045 | 99.3  |          |
| ATGAAGC -  | STY2624 | 100    | STY3022  | 55.882 | STY2624 | 99.6  | STY3022  |
|            | STY1043 | 66.019 | STY3397  | 60.748 | STY1043 | 33.49 | STY3397  |
| ATGCTCG -  | STY2734 | 100    | STY4440  | 67.29  | STY2734 | 98.7  | STY2560  |
| ATGCCGC +  | STY4403 | 100    | STY3601  | 61.165 | STY4403 | 97.29 | STY3601  |
| ATGACGC -  | STY3769 | 100    | STY3333  | 68     | STY3769 | 98.5  | STY3333  |
| ATGAAAA, + | STY3753 | 100    | STY2721  | 59.223 | STY3753 | 99.3  | STY2721  |
| ATGAGCC -  | STY3050 | 100    | STY3194  | 76     | STY3050 | 82.64 | STY3194  |
| ATGAACA -  | STY2613 | 100    | STY3263  | 60.194 | STY2613 | 98.7  | STY3052  |
| ATGGGTA -  | STY2682 | 100    | STY3162  | 63.366 | STY2682 | 99.1  | STY1234  |
| ATGCCCT -  | STY2467 | 100    | STY0833  | 68     | STY2467 | 99.7  | STY0833  |
| ATGCATG -  | STY1132 | 100    | STY0159  | 58     | STY1132 | 98.9  | STY0159  |
| ATGATAA, + | STY1813 | 100    | STY0157  | 75     | STY1813 | 98.1  | STY0157  |
| ATGAGTG +  | STY4710 | 100    |          |        | STY4710 | 98.9  |          |
| ATGTCAT +  | STY4742 | 99     | STY4121  | 67     | STY4742 | 95.5  | STY4121  |
|            | STY4479 | 62.264 | HCM1.232 | 58.333 | STY0565 | 22.23 | HCM1.232 |
| ATGCGCA -  | STY2486 | 100    | STY3900  | 59.223 | STY2486 | 98.9  | STY1752  |
|            | STY1234 | 63.725 | STY3162  | 63.107 | STY2401 | 43.7  | STY1234  |
| ATGATGG -  | STY4856 | 100    | STY4649  | 87     | STY4856 | 98.52 | STY4649  |
| ATGTTAA, + | STY4892 | 100    | STY2128  | 91     | STY4892 | 98.9  | STY2128  |
| ATGATGG +  | STY1261 | 100    | STY4305  | 68.932 | STY1261 | 86.34 | STY4305  |
| ATGAAGC -  | STY1682 | 100    |          |        | STY1682 | 98.9  |          |
|            | STY1184 | 100    | STY1185  | 100    | STY1185 | 83.59 | STY1184  |

|            |         |        |         |        |         |       |         |
|------------|---------|--------|---------|--------|---------|-------|---------|
| ATGTTTG` - | STY4356 | 100    | STY4304 | 85.149 | STY4356 | 98.9  | STY0304 |
| ATGAAAC -  | STY2705 | 100    | STY2261 | 62     | STY2705 | 99.6  | STY2261 |
| ATGATCG -  | STY1263 | 100    | STY0815 | 65     | STY1263 | 99.2  | STY0913 |
| ATGGTAC +  | STY1785 | 100    | STY2441 | 66     | STY1785 | 98.5  | STY2441 |
| ATGGCAT +  | STY4727 | 100    |         |        | STY4727 | 98.5  |         |
| ATGGGAC -  | STY1266 | 100    | STY0911 | 85     | STY1266 | 99.1  | STY4257 |
| ATGAAAA +  | STY0024 | 100    | STY0589 | 75     | STY0024 | 98.5  | STY0589 |
| ATGAGCA -  | STY1817 | 100    |         |        | STY1817 | 98.33 |         |
| ATGCCAA -  | STY1776 | 100    | STY2818 | 46.602 | STY1776 | 99.5  | STY2818 |
| ATGTGGT -  | STY1693 | 100    | STY3415 | 66     | STY1693 | 99    | STY0562 |
| ATGGAAA +  | STY4252 | 100    | STY0924 | 72     | STY4252 | 98.36 | STY3498 |
| ATGTCGA -  | STY0131 | 100    | STY2610 | 63.303 | STY0131 | 98.6  | STY1278 |
| ATGGCAC -  | STY0727 | 100    | STY2847 | 79     | STY0727 | 99.2  | STY4489 |
| ATGATGA +  | STY4427 | 100    |         |        | STY4427 | 98.8  |         |
| ATGACAA -  | STY3895 | 100    | STY0507 | 63.551 | STY3895 | 99.7  | STY3794 |
| ATGAAAA +  | STY0225 | 100    | STY1574 | 62     | STY0225 | 99.2  | STY1574 |
| ATGATGG +  | STY0494 | 100    | STY0161 | 86.139 | STY0494 | 99.3  | STY0161 |
| ATGAATT -  | STY0441 | 100    | STY2277 | 66     | STY0441 | 99.7  | STY2277 |
| GTGAACA +  | STY4438 | 100    | STY4434 | 58     | STY4438 | 99.4  | STY4434 |
| ATGACAG -  | STY2603 | 100    | STY4230 | 69.231 | STY2603 | 99.3  | STY4230 |
| ATGTGGC +  | STY1787 | 100    | STY2980 | 63.725 | STY1787 | 99.4  | STY2980 |
|            | STY4140 | 38.462 |         |        | STY4140 | 4.47  |         |
| ATGCTAA +  | STY1650 | 100    | STY2891 | 63.107 | STY1650 | 98.5  | STY2891 |
| ATGACAG -  | STY2288 | 100    | STY2681 | 60.784 | STY2288 | 98.5  | STY1150 |
| ATGAGGC +  | STY3932 | 100    | STY4466 | 66     | STY3932 | 99    | STY4466 |
| ATGTTGT +  | STY0244 | 100    | STY4763 | 62.5   | STY0244 | 98.6  | STY2702 |
| GTGCGTC -  | STY2265 | 100    | STY1258 | 53.774 | STY2265 | 98.8  | STY1258 |
| ATGTTAG +  | STY0145 | 100    | STY3460 | 62.376 | STY0145 | 99.6  | STY2703 |
| ATGTGCG -  | STY2592 | 100    | STY0145 | 54     | STY2592 | 98.7  | STY0145 |
| ATGACCA +  | STY4243 | 100    | STY2201 | 76     | STY4243 | 99.3  | STY0011 |
| TTGCTTA -  | STY3463 | 100    | STY4292 | 63     | STY3463 | 99.3  | STY4292 |
| ATGGCAT -  | STY2801 | 100    | STY2532 | 67.647 | STY2801 | 99.6  | STY3787 |
|            | STY2851 | 62     | STY3403 | 47     | STY2851 | 21.3  | STY3403 |
| ATGCCTT +  | STY0249 | 100    | STY0515 | 61     | STY0249 | 99.6  | STY2327 |
|            | STY1329 | 62.037 | STY4872 | 59.804 | STY4872 | 7.69  | STY1329 |
| ATGAACT +  | STY4058 | 100    | STY0134 | 60.194 | STY4058 | 98.6  | STY0134 |
| ATGGCGT +  | STY4171 | 100    | STY0887 | 82     | STY4171 | 98.4  | STY1308 |
| ATGAGTA +  | STY4258 | 100    | STY2511 | 68     | STY4258 | 98.9  | STY2511 |
| TTGTATC -  | STY4050 | 100    | STY3094 | 72     | STY4050 | 98.8  | STY3094 |
| ATGTCGA +  | STY2575 | 100    | STY4268 | 67     | STY2575 | 98.6  | STY4268 |
| ATGCAGC +  | STY2804 | 100    | STY2080 | 55     | STY2804 | 98.7  | STY2080 |
| ATGAAAA +  | STY2676 | 99     | STY4415 | 62.963 | STY2676 | 93.67 | STY4415 |
| ATGAAGT -  | STY0868 | 100    | STY2584 | 60.194 | STY0868 | 100   | STY2162 |
| ATGGCGC -  | STY0626 | 100    | STY0063 | 64     | STY0626 | 98.8  | STY0063 |
| ATGGTTA -  | STY4803 | 100    | STY4807 | 81     | STY4803 | 99.6  | STY4807 |
| ATGACTG +  | STY2836 | 100    | STY0855 | 73.267 | STY2836 | 98.9  | STY0855 |
| ATGAATC -  | STY3373 | 100    | STY3830 | 60.396 | STY3373 | 99.2  | STY3830 |
| GTGTTTC +  | STY4444 | 100    | STY1000 | 68     | STY4444 | 97.7  | STY1000 |
| ATGTCAC +  | STY2795 | 100    | STY3231 | 62.745 | STY2795 | 98.8  | STY3231 |
| ATGTTAG +  | STY2280 | 100    | STY4170 | 62     | STY2280 | 99.3  | STY4170 |
| ATGAAAC -  | STY0596 | 100    | STY4901 | 60     | STY0596 | 98.9  | STY2155 |
| ATGCTCT -  | STY3852 | 100    | STY4450 | 60.784 | STY3852 | 98.8  | STY4450 |



|           |          |        |         |        |          |       |          |
|-----------|----------|--------|---------|--------|----------|-------|----------|
| ATGAATA+  | STY0913  | 100    | STY3519 | 70.755 | STY0913  | 98.3  | STY1263  |
| ATGCCCA+  | STY0749  | 100    | STY0525 | 58.252 | STY0749  | 98.4  | STY0525  |
| ATGCACG-  | STY3803  | 100    |         |        | STY3803  | 97.6  |          |
| ATGACCA-  | STY0719  | 100    |         |        | STY0719  | 98.9  |          |
| ATGCCTG+  | STY0771  | 100    | STY2413 | 58.095 | STY0771  | 98.2  | STY2413  |
| ATGAGCT-  | STY3761  | 100    | STY2285 | 70.476 | STY3761  | 98.5  | STY2285  |
| ATGGAAA+  | STY4464  | 100    |         |        | STY4464  | 99.1  |          |
|           | STY4459  | 100    | STY4458 | 64     | STY4459  | 100   | STY4458  |
| ATGCTTG+  | STY2803  | 100    | STY4297 | 63.366 | STY2803  | 98.7  | STY4297  |
| ATGAAAC+  | STY0178  | 100    |         |        | STY0178  | 98.2  |          |
| ATGTCTA+  | STY3721  | 100    | STY0240 | 60     | STY3721  | 96.6  | STY0240  |
| ATGGCAG+  | STY3855  | 100    | STY3430 | 64.423 | STY3855  | 99    | STY3430  |
|           | STY3801  | 95     | STY0185 | 31     | STY3801  | 79.52 | STY0185  |
| ATGCTAA-  | STY3001  | 100    | STY4872 | 56.757 | STY3001  | 96.1  | STY4872  |
| TTGACAC+  | STY1231  | 100    |         |        | STY1231  | 99.4  |          |
| ATGTTTC-  | STY1350  | 100    |         |        | STY1350  | 98.9  |          |
| ATGGCAC-  | STY2851  | 100    | STY0110 | 69     | STY2851  | 99    | STY0110  |
| ATGCAGA+  | STY0058  | 100    | STY4809 | 61.386 | STY0058  | 98.1  | STY4104  |
| ATGAAAA+  | STY1038  | 100    | STY2629 | 69     | STY1038  | 100   | STY2629  |
| ATGCGAT-  | STY4009  | 100    | STY4184 | 48     | STY4009  | 98.8  | STY4184  |
| GTGTTGC-  | STY1710  | 100    | STY0361 | 58     | STY1710  | 98.9  | STY0361  |
| ATGAATA-  | STY1322  | 100    | STY1322 | 63.366 | STY1322  | 100   | STY1322  |
|           | STY4632  | 92.079 | STY3944 | 62.5   | STY4632  | 61.64 | STY3944  |
| ATGACCA+  | STY0459  | 100    |         |        | STY0459  | 97.83 |          |
| ATGCTGA-  | STY1405  | 100    | STY4926 | 62.264 | STY1405  | 98.6  | STY2491  |
| ATGCGTT+  | STY1292  | 100    | STY1383 | 61.765 | STY1292  | 98.2  | STY4249  |
| GTGGATA+  | STY1955  | 100    | STY1955 | 58.252 | STY1955  | 99.7  | STY1955  |
| ATGAATA-  | STY1285  | 100    | STY2472 | 69.307 | STY1285  | 98.9  | STY2472  |
| ATGCCCC-  | STY3133  | 100    | STY0835 | 67.327 | STY3133  | 98.6  | STY0835  |
| ATGGCAC-  | STY3055  | 100    | STY3457 | 53.333 | STY3055  | 98.9  | STY3457  |
| TTGATAC+  | STY3044  | 100    | STY0897 | 62.745 | STY3044  | 98.8  | STY0186  |
| ATGATGA+  | STY1150  | 100    | STY4682 | 63.889 | STY1150  | 99    | STY4682  |
| ATGGCAA-  | STY0103  | 100    | STY0943 | 78.218 | STY0103  | 98.9  | STY0943  |
| ATGGCAC-  | STY3625  | 100    | STY0438 | 77     | STY3625  | 99.5  | STY0617  |
| ATGAATT(+ | STY3641  | 100    | STY2743 | 69.307 | STY3641  | 98.9  | STY2743  |
| ATGGCTT-  | STY3734  | 100    |         |        | STY3734  | 100   |          |
| ATGGCAC+  | STY1945  | 100    |         |        | STY1945  | 99.6  |          |
| ATGCGTT+  | STY1971  | 100    | STY0214 | 56.731 | STY1971  | 99.2  | STY0214  |
| ATGACCG-  | STY2129  | 100    | STY4466 | 61.165 | STY2129  | 99.4  | STY0046  |
| ATGGAAC-  | STY4407  | 100    | STY4874 | 87.129 | STY4407  | 98.7  | STY4796  |
| ATGAACC+  | STY0471  | 100    | STY2753 | 74.51  | STY0471  | 98.02 | STY2753  |
| ATGATCC+  | STY3831  | 100    | STY2649 | 56.436 | STY3831  | 100   | STY2649  |
| ATGATCG+  | STY3595  | 100    | STY3596 | 100    | STY3595  | 99    | STY3596  |
| ATGGATT(+ | STY0658  | 99     | STY1256 | 60.396 | STY0658  | 83.77 | HCM1.203 |
| ATGAGCC-  | STY1318  | 100    | STY3215 | 66.346 | STY1318  | 100   | STY3215  |
| ATGAGTA+  | STY1488  | 100    | STY1288 | 91     | STY1488  | 92.02 | STY1288  |
| ATGTGTA+  | STY1455  | 100    | STY0429 | 67.619 | STY1455  | 99.2  | STY0536  |
| GTTCCCG-  | STY1439a | 97     | STY2281 | 64.486 | STY1439a | 11.25 | STY2281  |
| TTGTACT+  | STY1394  | 100    | STY4945 | 56     | STY1394  | 99.1  | STY4945  |
| ATGAACA-  | STY0520  | 100    | STY3569 | 73     | STY0520  | 98.9  | STY3569  |
| ATGAAAA+  | STY1519  | 100    | STY4097 | 66.019 | STY1519  | 99    | STY3100  |
| ATGACAG-  | STY1534  | 100    | STY4819 | 63.462 | STY1534  | 99.5  | STY4819  |

|           |         |        |          |        |         |       |          |
|-----------|---------|--------|----------|--------|---------|-------|----------|
| ATGAAAA + | STY0979 | 100    | STY3237  | 81     | STY0979 | 98.4  | STY3237  |
| ATGAAAG + | STY0663 | 100    | STY2910  | 63.107 | STY0663 | 98.8  | STY1555  |
| ATGGAAA - | STY1311 | 100    | STY0670  | 61.468 | STY1311 | 99.4  | STY0670  |
|           | STY4789 | 66     | STY2396  | 61.165 | STY4789 | 57.65 | STY2396  |
|           | STY3008 | 63.889 | STY3688  | 52.941 | STY3008 | 8.4   | STY3688  |
| ATGCGCC + | STY1460 | 100    | STY2664  | 67.961 | STY1460 | 98.6  | STY2797  |
| ATGGATT - | STY1433 | 100    | STY4492  | 56.311 | STY1433 | 65.19 | STY4492  |
|           | STY1339 | 55.769 | STY2349  | 49.505 | STY1339 | 7.88  | STY2349  |
| ATGTTGC + | STY2084 | 100    | STY0661  | 60.194 | STY2084 | 99.6  | STY0661  |
| ATGGCGA - | STY3112 | 100    | STY3830  | 68     | STY3112 | 99.3  | STY3830  |
| TTGATTA + | STY3166 | 100    | STY4468  | 67.961 | STY3166 | 99.1  | STY4468  |
| ATGGCAA - | STY3218 | 100    | STY4156  | 63     | STY3218 | 99.4  | STY4156  |
| ATGTACC + | STY3246 | 100    | STY4047  | 61.765 | STY3246 | 98.4  | STY4189  |
| ATGTTAA - | STY0487 | 100    | STY2160  | 67.327 | STY0487 | 90.55 | STY2160  |
| ATGCCCG + | STY4230 | 100    | STY2603  | 70.192 | STY4230 | 95.12 | STY2603  |
| ATGAAAA + | STY4182 | 100    | STY2494  | 63     | STY4182 | 99    | STY2494  |
| ATGCGTA - | STY4120 | 100    | STY4743  | 74.257 | STY4120 | 97.7  | STY4743  |
| ATGGTAC - | STY4091 | 100    |          |        | STY4091 | 98.15 |          |
| ATGACAA - | STY3099 | 100    | STY3098  | 88     | STY3099 | 98.6  | STY3098  |
| ATGTCGG - | STY3129 | 100    | STY2687  | 69     | STY3129 | 99.1  | STY2687  |
| ATGTCTG - | STY3196 | 100    | STY2109  | 68     | STY3196 | 99.4  | STY0274  |
| GTGGAAA + | STY4215 | 100    | HCM2.001 | 53     | STY4215 | 97.31 | HCM2.001 |
| ATGACCA - | STY3121 | 100    | STY3386  | 63.208 | STY3121 | 100   | STY0294  |
|           | STY4512 | 98     | STY2510  | 66.667 | STY4512 | 51.88 | STY4508  |
| ATGCGAA + | STY3354 | 100    | STY2904  | 66.667 | STY3354 | 98.6  | STY4491  |
| ATGGTCT - | STY3160 | 100    | STY3244  | 78     | STY3160 | 98.5  | STY3244  |
| ATGGTCA + | STY2450 | 100    | STY1767  | 65.094 | STY2450 | 99    | STY1767  |
| ATGAATA - | STY2306 | 100    |          |        | STY2306 | 97.4  |          |
| ATGATTA - | STY2388 | 100    | STY3507  | 66     | STY2388 | 99.7  | STY3992  |
| ATGACAC - | STY0936 | 100    | STY2899  | 65.347 | STY0936 | 97.65 | STY2899  |
| ATGTTTG - | STY4136 | 100    | STY4759  | 79.208 | STY4136 | 99.4  | STY4759  |
| ATGCCAG + | STY4517 | 99     | STY4667  | 95     | STY4517 | 97.3  | STY4667  |
| TTGCCTC - | STY4089 | 100    |          |        | STY4089 | 98.3  |          |
| ATGCTCA - | STY4206 | 100    | STY4796  | 88     | STY4206 | 99.4  | STY4796  |
| ATGAAAA - | STY4293 | 100    | STY4285  | 61.765 | STY4293 | 99.6  | STY4285  |
| ATGAAAC - | STY3473 | 100    | STY4613  | 61     | STY3473 | 99.6  | STY3986  |
| ATGAAAC + | STY4920 | 100    | STY3569  | 50.98  | STY4920 | 98.9  | STY3569  |
|           | STY0519 | 72     | STY2341  | 71     | STY3570 | 28.15 | STY2719  |
| ATGAGTC - | STY3465 | 100    | STY0359  | 62.745 | STY3465 | 97.9  | STY0359  |
| ATGCGTA - | STY3363 | 100    | STY4883  | 65     | STY3363 | 99.7  | STY4883  |
| ATGATGC - | STY3262 | 100    | STY2418  | 60     | STY3262 | 99.3  | STY2418  |
| ATGCCAT - | STY2943 | 100    | STY3480  | 64.078 | STY2943 | 99.4  | STY3480  |
| ATGAGTA + | STY2411 | 100    | STY2696  | 54.902 | STY2411 | 100   | STY2696  |
| GTGAATA - | STY2456 | 100    | STY2456  | 63.107 | STY2456 | 99.7  | STY2456  |
| ATGCGAC - | STY2459 | 100    | STY4410  | 62.5   | STY2459 | 99.9  | STY1331  |
| ATGAACG - | STY2383 | 100    | STY2571  | 62.617 | STY2383 | 99.5  | STY2337  |
| ATGTTCA + | STY2648 | 100    | STY0214  | 64     | STY2648 | 100   | STY3059  |
| ATGTCTC + | STY4373 | 100    | HCM2.007 | 57     | STY4373 | 100   | HCM2.007 |
| ATGCTCA + | STY4324 | 100    | STY0584  | 71     | STY4324 | 99.5  | STY0584  |
| ATGGCGT + | STY4720 | 100    | STY4676  | 57.843 | STY4720 | 99.4  | STY4676  |
| ATGAATA + | STY4024 | 100    |          |        | STY4024 | 98.58 |          |

|            |          |        |          |         |          |       |          |
|------------|----------|--------|----------|---------|----------|-------|----------|
| ATGTCTC. + | STY3330  | 100    | STY1333  | 91      | STY3330  | 98.2  | STY3268  |
| ATGTCTG +  | STY3216  | 100    | STY1503  | 49.505  | STY3216  | 99.7  | STY1503  |
| ATGATAC +  | STY0815  | 100    | STY2680  | 62      | STY0815  | 99.1  | STY2679  |
| ATGGATT. + | STY0858  | 100    | STY0221  | 60.396  | STY0858  | 98.7  | STY0221  |
| ATGGTGC +  | STY2866  | 100    | STY1336  | 61.165  | STY2866  | 99.9  | STY1336  |
| ATGTCCA -  | STY2290  | 100    | STY2639  | 57.843  | STY2290  | 98.3  | STY2639  |
| GTGCTAA -  | STY0806  | 100    | STY1976  | 63.366  | STY0806  | 98.9  | STY1327  |
| ATGAGTG -  | STY0852  | 100    | STY4224  | 79      | STY0852  | 98.8  | STY4224  |
| ATGATTA(-  | STY0895  | 100    | STY2406  | 61      | STY0895  | 98.9  | STY0635  |
| ATGCTTT +  | STY3493  | 100    | STY0708  | 64.151  | STY3493  | 99    | STY0644  |
| ATGCTCT +  | STY3402  | 100    | STY2414  | 66      | STY3402  | 99    | STY2414  |
| ATGGTAG -  | STY4513  | 100    | STY4104  | 58.824  | STY4513  | 88.51 | STY4104  |
| ATGAAAA +  | STY0398  | 100    | STY1515  | 60.577  | STY0398  | 100   | STY1515  |
| ATGGCGC +  | STY2822  | 99     | STY3410  | 53.465  | STY2822  | 98.1  | STY3410  |
|            | STY3220  | 61     | STY3456  | 57.426  | STY3220  | 27.02 | STY3456  |
| ATGACAC -  | STY4799  | 100    | STY3075  | 54      | STY4799  | 98.7  | STY3075  |
| ATGAAAG +  | STY0629  | 100    | STY2892  | 67.327  | STY0629  | 99    | STY2892  |
| ATGTTGA -  | STY3752  | 100    | STY0082  | 64.078  | STY3752  | 99.4  | STY4161  |
| ATGAATT(+  | STY4722  | 100    | STY3600  | 63.366  | STY4722  | 100   | STY2599  |
| ATGACAA -  | STY1732  | 100    |          | STY1732 |          | 100   |          |
| ATGATGT +  | STY3564  | 100    | STY2404  | 67.308  | STY3564  | 87.23 | STY2404  |
|            | STY4777  | 61     | STY3111  | 60.748  | STY3111  | 16.17 | STY4777  |
| ATGTGGT +  | STY4446  | 100    | STY0875  | 64.078  | STY4446  | 99.5  | HCM2.001 |
| ATGTTTG. - | STY4642  | 100    | STY3662  | 85      | STY4642  | 96.7  | STY3662  |
| ATGAGCG +  | STY2907  | 100    | STY4442  | 60.577  | STY2907  | 99.11 | STY4442  |
| ATGAAAT(-  | STY3885  | 100    | STY3107  | 62.376  | STY3885  | 100   | STY3107  |
| ATGAAAA +  | STY3026  | 99     |          | STY3026 |          | 98.3  |          |
|            | STY3925  | 70.297 | STY3437  | 65.347  | STY2439  | 38    | STY3925  |
| ATGCCCG -  | STY3057  | 100    | STY4688  | 60.396  | STY3057  | 99.1  | STY4688  |
| ATGACTG +  | STY1661  | 100    | STY4514  | 65.347  | STY1661  | 99.1  | STY4514  |
| ATGAACA +  | STY1560  | 100    | STY1309  | 65.385  | STY1560  | 99.1  | STY1309  |
| ATGAATA +  | STY2250  | 99     | STY2243  | 82      | STY2250  | 96.4  | STY2243  |
| ATGCAAG +  | STY4750  | 100    | STY0860  | 51.961  | STY4750  | 99.5  | STY0860  |
| ATGTACG +  | STY4354  | 100    | STY2496  | 58.654  | STY4354  | 100   | STY2496  |
| ATGAAAA. - | STY0352  | 100    | STY1521  | 61.386  | STY0352  | 99.5  | STY1521  |
| TTGAGGC -  | STY1943  | 100    | STY2318  | 62.376  | STY1943  | 99.1  | STY0305  |
| ATGAAAC -  | STY1908  | 100    | STY0231  | 58.333  | STY1908  | 79.17 | STY0231  |
| ATGGACA -  | STY1991  | 100    | STY3653  | 65.686  | STY1991  | 97.1  | STY3653  |
| ATGAATA. - | STY2087  | 100    | STY4152  | 56      | STY2087  | 98.6  | STY4152  |
| ATGAACG -  | STY1969  | 100    | STY1303  | 61.905  | STY1969  | 97.6  | STY4462  |
| ATGTGTG -  | STY2445  | 100    | STY1043  | 59.406  | STY2445  | 100   | STY1043  |
|            | STY4536  | 83     | STY4451  | 81      | STY4451  | 49.9  | STY4536  |
|            | HCM2.013 | 73     | STY1048  | 59.813  | HCM2.013 | 53.61 | HCM1.54  |
|            | STY2309  | 60.194 | STY4046  | 48      | STY2309  | 13.29 | STY4046  |
|            | STY2324  | 63.889 | HCM2.009 | 62      | STY2324  | 11.28 | STY2028  |
|            | STY3383  | 62.5   | STY3850  | 58.095  | STY3850  | 13.78 | STY3383  |
|            | STY3182  | 77     | STY0063  | 62.037  | STY3182  | 71.9  | STY0895  |
|            | STY4044  | 61.321 | STY4936  | 47.115  | STY4044  | 25.99 | STY4936  |
|            | HCM1.241 | 72     | STY4298  | 67.647  | HCM1.241 | 49.48 | STY4298  |
|            | STY4460  | 46.078 | STY2196  | 43.137  | STY4460  | 19.42 | STY2196  |
|            | STY4697  | 62.136 |          | STY4697 |          | 6.41  |          |

|            |         |        |          |        |         |       |          |
|------------|---------|--------|----------|--------|---------|-------|----------|
|            | STY2602 | 61.386 | STY3094  | 56.863 | STY2602 | 23.74 | STY3094  |
|            | STY3902 | 62.5   | STY2911  | 52.83  | STY3902 | 28.39 | STY2911  |
|            | STY4759 | 58.654 |          |        | STY4759 | 15.4  |          |
|            | STY0787 | 100    | STY1921  | 69     | STY0787 | 98.7  | STY1921  |
|            | STY4707 | 55.446 | STY0727  | 49.02  | STY4707 | 33.32 | STY0727  |
|            | STY3325 | 29     |          |        | STY3325 | 17.37 |          |
|            | STY2857 | 100    | STY1763  | 77     | STY2857 | 99.6  | STY0801  |
| ATGACGA -  | STY3188 | 100    | STY4200  | 60.577 | STY3188 | 100   | STY4200  |
| ATGAACG +  | STY2068 | 100    | STY3177  | 61.165 | STY2068 | 100   | STY0807  |
| ATGAAGC -  | STY2298 | 100    | STY3021  | 59     | STY2298 | 100   | STY3021  |
| GTGAACA +  | STY3685 | 100    | STY4617  | 92     | STY3685 | 100   | STY4617  |
| ATGAATT -  | STY3764 | 100    | STY2802  | 77     | STY3764 | 100   | STY2802  |
| ATGACGC +  | STY1293 | 100    | STY4163  | 65     | STY1293 | 100   | STY2229  |
|            | STY3643 | 100    | STY0798  | 82     | STY3643 | 100   | STY0798  |
| ATGAAGA -  | STY3671 | 100    | STY2300  | 57     | STY3671 | 100   | STY2300  |
| ATGAACG +  | STY3687 | 100    | STY4615  | 88     | STY3687 | 100   | STY4615  |
| GTGAGTA -  | STY3845 | 100    | STY0899  | 55     | STY3845 | 100   | STY0899  |
| GTGAATA -  | STY1360 | 100    |          |        | STY1360 | 100   |          |
| ATGACAC -  | STY1598 | 100    | STY1320  | 63.208 | STY1598 | 100   | STY1320  |
| ATGCGTA +  | STY3665 | 100    | STY4639  | 74     | STY3665 | 100   | STY4639  |
| ATGACGC +  | STY3681 | 100    | STY4621  | 90     | STY3681 | 100   | STY4621  |
| ATGATGA +  | STY2881 | 100    | STY3703  | 100    | STY3703 | 100   | STY2881  |
| ATGGTGA -  | STY0202 | 100    | STY3134  | 61     | STY0202 | 100   | STY3134  |
| ATGAAAT, + | STY0322 | 100    | STY0765  | 64     | STY0322 | 100   | STY0761  |
| ATGGCGA +  | STY0478 | 100    | STY4884  | 54.717 | STY0478 | 100   | STY4884  |
| ATGAAAA, + | STY3683 | 100    | STY4619  | 65.347 | STY3683 | 100   | STY4619  |
| GTGCGG1 +  | STY2895 | 100    | HCM1.70  | 60     | STY2895 | 100   | STY2568  |
| ATGAAAA, - | STY0204 | 100    | STY3956  | 64.545 | STY0204 | 100   | STY1409  |
| ATGACGA +  | STY0324 | 100    | STY0321  | 74.51  | STY0324 | 100   | STY0321  |
| ATGCAGC +  | STY0480 | 100    | STY0477  | 64     | STY0480 | 100   | STY0477  |
| TTGGGTC +  | STY1029 | 100    | HCM1.143 | 62.857 | STY1029 | 100   | HCM1.143 |
| ATGAAAA, - | STY4219 | 100    | STY1698  | 62.376 | STY4219 | 100   | STY0684  |
| GTGTTTCG - | STY4653 | 100    | STY1436  | 55.882 | STY4653 | 100   | STY1436  |
| ATGATGA -  | STY4679 | 100    | STY2439  | 62.376 | STY4679 | 100   | STY2439  |
| ATGAAAA, + | STY4831 | 100    | STY1735  | 64.151 | STY4831 | 100   | STY1735  |
| ATGAAAA, + | STY4875 | 100    | STY4020  | 87     | STY4875 | 100   | STY4020  |
| GTGAAAG -  | STY4220 | 100    | STY4798  | 77     | STY4220 | 100   | STY4798  |
| ATGAGAA -  | STY4596 | 100    | STY2545  | 57.692 | STY4596 | 100   | STY2545  |
| ATGAAAC -  | STY4259 | 100    | STY3777  | 66.981 | STY4259 | 100   | STY0906  |
| GTGATGA +  | STY4529 | 100    |          |        | STY4529 | 100   |          |
| TTGAGGT -  | STY4675 | 100    | STY4680  | 61.386 | STY4675 | 100   | STY1187  |
| ATGCACA +  | STY4828 | 100    | STY4241  | 63     | STY4828 | 100   | STY4241  |
| ATGACCT +  | STY4853 | 100    | STY2093  | 68.269 | STY4853 | 100   | STY2093  |
| ATGGCGC +  | STY0215 | 100    | STY4303  | 64.706 | STY0215 | 99    | STY4303  |
| ATGTGTT, - | STY0718 | 100    | STY0578  | 69     | STY0718 | 97.1  | STY0578  |
| GTGACAA -  | STY0743 | 100    | STY4935  | 65.347 | STY0743 | 99.1  | STY2344  |
| ATGTCGA -  | STY3946 | 100    | STY0906  | 68.932 | STY3946 | 91    | STY3100  |
| ATGAATA, - | STY2233 | 100    | STY2222  | 77.228 | STY2233 | 98.9  | STY2222  |
| ATGAACA +  | STY3993 | 100    | STY2696  | 65.385 | STY3993 | 98.8  | STY2696  |
|            | STY2350 | 60.952 | STY0605  | 59.406 | STY3289 | 13.62 | STY2350  |
| ATGAAAA, - | STY3901 | 100    | STY2834  | 59.615 | STY3901 | 98.5  | STY2834  |
| ATGCCAT -  | STY0049 | 100    | STY2781  | 63.107 | STY0049 | 98.2  | STY3859  |

|           |         |        |         |        |         |       |          |
|-----------|---------|--------|---------|--------|---------|-------|----------|
| GTGGAGA+  | STY0135 | 100    | STY3656 | 78     | STY0135 | 99    | STY3656  |
| ATGGATA-  | STY0171 | 100    | STY4043 | 74     | STY0171 | 98.7  | STY4043  |
|           | STY3920 | 76     | STY0026 | 72     | STY4941 | 50.92 | STY3920  |
| ATGAAGC-  | STY3507 | 100    | STY2496 | 66     | STY3507 | 98.8  | STY2496  |
| ATGAGTC-  | STY3548 | 100    | STY3562 | 63.81  | STY3548 | 98.9  | STY3562  |
| ATGTCTA+  | STY0678 | 100    | STY1967 | 87     | STY0678 | 100   | STY1967  |
|           | STY1292 | 65.686 | STY0372 | 60.396 | STY1292 | 20.03 | STY0480  |
| ATGAGTG+  | STY0724 | 100    | STY0491 | 64.545 | STY0724 | 98.7  | STY3871  |
| GTGCAGC+  | STY0752 | 100    | STY0617 | 60.784 | STY0752 | 99.4  | STY0617  |
| ATGCGTA-  | STY0269 | 100    | STY3458 | 61.538 | STY0269 | 99.5  | STY3458  |
| ATGGAGA-  | STY1521 | 100    | STY0174 | 67     | STY1521 | 98.6  | STY1934  |
| ATGAATA-  | STY2326 | 100    |         |        | STY2326 | 97.5  |          |
| ATGAGAA-  | STY4938 | 100    | STY0031 | 65     | STY4938 | 97.2  | STY0659  |
|           | STY4457 | 58.491 |         |        | STY4457 | 28.87 |          |
| ATGAGTG+  | STY0366 | 100    | STY0909 | 61.538 | STY0366 | 99.1  | STY0909  |
|           | STY3690 | 93     | STY4612 | 93     | STY3690 | 87.1  | STY4612  |
|           | STY0306 | 97     | STY2634 | 53     | STY0306 | 87.33 | STY2634  |
|           | STY3923 | 67     | STY0498 | 64.706 | STY3923 | 20.71 | STY0498  |
| ATGACGA+  | STY2899 | 100    | STY0936 | 65.347 | STY2899 | 98.8  | STY0936  |
| ATGCTTC-  | STY1115 | 100    | STY4081 | 60     | STY1115 | 99.4  | STY4081  |
| ATGGCTA-  | STY1147 | 100    | STY3577 | 52     | STY1147 | 99.7  | STY3577  |
|           | STY4835 | 95     | STY1924 | 63.81  | STY4835 | 64.82 | STY0602a |
| ATGTCCA+  | STY2918 | 100    | STY0612 | 60     | STY2918 | 98.7  | STY2912  |
| ATGAAGA+  | STY1136 | 100    | STY4116 | 67     | STY1136 | 98.6  | STY2911  |
| ATGAAAT+  | STY4345 | 100    | STY4753 | 66.346 | STY4345 | 98    | STY4753  |
| ATGAAGG+  | STY4307 | 99     | STY4308 | 85     | STY4307 | 97.5  | STY4308  |
| ATGAAAC-  | STY1276 | 100    | STY3956 | 57.282 | STY1276 | 99.4  | STY3956  |
| ATGATGA-  | STY1792 | 100    | STY3751 | 64.423 | STY1792 | 99.6  | STY3751  |
| GTGAGAC+  | STY1184 | 100    | STY1185 | 65     | STY1184 | 99.8  | STY1185  |
| GTGTCTA+  | STY1236 | 100    | STY2609 | 73     | STY1236 | 99.3  | STY2609  |
| TTGTCGG+  | STY1257 | 100    |         |        | STY1257 | 99.3  |          |
| ATGACTA+  | STY1854 | 100    | STY2351 | 54.808 | STY1854 | 99.2  | STY2351  |
| ATGAGCC+  | STY4233 | 100    |         |        | STY4233 | 99.6  |          |
|           | STY4310 | 63     |         |        | STY4310 | 7.65  |          |
| ATGAAAA+  | STY4417 | 100    | STY0456 | 65.049 | STY4417 | 98.7  | STY0456  |
| ATGAGTC+  | STY4462 | 100    | STY0511 | 68     | STY4462 | 98.9  | STY0376  |
| ATGAGTA-  | STY4496 | 100    | STY3372 | 60.377 | STY4496 | 99.1  | STY1378  |
| ATGAAAA+  | STY2607 | 100    | STY1927 | 61     | STY2607 | 98.7  | STY0070  |
| ATGAAAA+  | STY4445 | 100    |         |        | STY4445 | 98.5  |          |
| ATGAAAC-  | STY4483 | 100    | STY0219 | 61.386 | STY4483 | 98.7  | STY0219  |
| ATGTCAA-  | STY4685 | 100    | STY2341 | 65.385 | STY4685 | 99.4  | STY1653  |
| ATGAAAA-  | STY0923 | 100    | STY0920 | 75     | STY0923 | 99.6  | STY0920  |
|           | STY0823 | 52.941 |         |        | STY0823 | 7.24  |          |
| ATGTTTT(- | STY0933 | 100    |         |        | STY0933 | 97.6  |          |
| ATGAAGG-  | STY3804 | 100    | STY3989 | 65     | STY3804 | 95.3  | STY2126  |
|           | STY1609 | 79     | STY2265 | 63.208 | STY1609 | 32    | STY1610  |
|           | STY2213 | 44     | STY1285 | 43.564 | STY2213 | 12.65 | STY1285  |
| ATGGCCT-  | STY4692 | 100    | STY4318 | 48.077 | STY4692 | 99.1  | STY4318  |
| GTGAATG+  | STY0911 | 100    | STY4426 | 86     | STY0911 | 99.1  | STY1266  |
|           | STY1160 | 63.366 |         |        | STY1160 | 5.38  |          |
| ATGAGTA-  | STY0223 | 100    | STY3396 | 68.317 | STY0223 | 97.3  | STY1811  |

|           |         |        |          |        |         |       |         |
|-----------|---------|--------|----------|--------|---------|-------|---------|
| ATGACAG + | STY0401 | 100    | STY3778  | 60     | STY0401 | 98    | STY0773 |
| ATGAACA + | STY1763 | 100    | STY0801  | 82     | STY1763 | 98.7  | STY0801 |
| ATGCTGA + | STY2143 | 100    | STY2141  | 73     | STY2143 | 98.4  | STY2141 |
| ATGGACT - | STY2201 | 100    | STY0990  | 66     | STY2201 | 98.7  | STY0990 |
| TTGAAAT/- | STY2496 | 100    | STY3096  | 74     | STY2496 | 99    | STY3507 |
|           | STY1170 | 65.686 | STY4906  | 54     | STY1170 | 8.49  | STY4906 |
| GTGCATT - | STY2541 | 100    | STY0639  | 64     | STY2541 | 99.3  | STY0639 |
| ATGTCGA - | STY2566 | 100    |          |        | STY2566 | 98.7  |         |
| ATGTCTT,+ | STY2262 | 100    | STY2567  | 67     | STY2262 | 98.3  | STY2567 |
| ATGAGTC - | STY3049 | 100    | STY3390  | 68     | STY3049 | 99.8  | STY3390 |
| ATGGCTA - | STY0228 | 100    |          |        | STY0228 | 98.5  |         |
| ATGCTGA - | STY1770 | 100    | STY0802  | 70.588 | STY1770 | 98.3  | STY0802 |
| ATGGAAC - | STY1098 | 100    | STY1773  | 62.385 | STY1098 | 99.3  | STY1773 |
| ATGGTAT - | STY2988 | 100    | STY4515  | 68.317 | STY2988 | 99    | STY4515 |
| GTGAAAT + | STY3776 | 100    | STY0231  | 63.81  | STY3776 | 99.1  | STY1692 |
| ATGCAAT - | STY2153 | 100    | STY4375  | 58     | STY2153 | 99.6  | STY2400 |
| ATGAAGA - | STY3021 | 100    | STY1726  | 61.905 | STY3021 | 99.3  | STY1726 |
| ATGTCGT + | STY1691 | 100    | STY3816  | 65     | STY1691 | 99.8  | STY0425 |
| ATGAAAC + | STY1181 | 100    | STY3941  | 62.5   | STY1181 | 99.8  | STY3941 |
| ATGCCTG + | STY4068 | 100    |          |        | STY4068 | 98.9  |         |
| ATGATTA + | STY4079 | 100    | STY2794  | 60     | STY4079 | 98.6  | STY2794 |
| ATGAAGC + | STY1590 | 100    | STY4699  | 88     | STY1590 | 99.5  | STY4699 |
| ATGTCAA - | STY1654 | 100    | STY4499  | 92     | STY1654 | 93.02 | STY4499 |
| ATGAAAA + | STY1566 | 100    | STY0962  | 81     | STY1566 | 99    | STY4503 |
| ATGCCTG + | STY4001 | 100    | STY4423  | 49     | STY4001 | 98.1  | STY4423 |
| GTGTCTG - | STY0353 | 100    | STY0995  | 54.455 | STY0353 | 98.8  | STY0995 |
| ATGTCTC + | STY0395 | 100    | STY3349  | 64.762 | STY0395 | 98.7  | STY3349 |
| ATGTGGT - | STY2216 | 100    | STY1676  | 57.282 | STY2216 | 94.24 | STY1676 |
| GTGACAG + | STY2276 | 100    | STY3610  | 64.078 | STY2276 | 99    | STY3610 |
| ATGTTTG,+ | STY0153 | 100    |          |        | STY0153 | 98.8  |         |
| ATGCTAA - | STY2553 | 100    | STY1325  | 72     | STY2553 | 98.8  | STY2372 |
| ATGAGCC + | STY0362 | 100    | STY2815  | 91     | STY0362 | 99.8  | STY0269 |
| ATGACTC + | STY2188 | 100    | STY4769  | 63.551 | STY2188 | 98.5  | STY3012 |
| ATGAATA - | STY1578 | 100    | STY2655  | 76     | STY1578 | 98.3  | STY2655 |
| ATGCCAC + | STY4351 | 100    | STY2855  | 61.468 | STY4351 | 99.8  | STY2855 |
| ATGAAAC - | STY3936 | 100    | STY2458  | 74.757 | STY3936 | 98.2  | STY2458 |
| ATGACCA + | STY0420 | 100    | STY2413  | 58     | STY0420 | 99.1  | STY2413 |
| ATGGCAA - | STY0483 | 100    | STY4270  | 62.857 | STY0483 | 99.3  | STY4270 |
| ATGATGC + | STY4467 | 100    | STY4739  | 56.436 | STY4467 | 99.2  | STY4739 |
| ATGATTG - | STY2543 | 100    | STY1721  | 53.922 | STY2543 | 99.4  | STY1721 |
| ATGAGCC + | STY3441 | 100    | STY2762  | 64.151 | STY3441 | 91.4  | STY2666 |
|           | STYrarB | 60     | STY4137  | 53.774 | STYrarB | 27.41 | STY4137 |
| ATGAAAA + | STY1741 | 100    | STY4263  | 77     | STY1741 | 98.8  | STY4263 |
| ATGTTAT(+ | STY2753 | 100    | STY0646  | 68.269 | STY2753 | 96.7  | STY0646 |
| ATGATAG - | STY0546 | 100    | STY3904  | 62.745 | STY0546 | 98.7  | STY1493 |
| ATGATGA - | STY4772 | 100    | STY0473  | 62.136 | STY4772 | 98.4  | STY4784 |
| ATGTCAG + | STY3368 | 100    | STY1666  | 77.451 | STY3368 | 98.3  | STY1666 |
| ATGAGCC - | STY3400 | 100    | STY3519  | 61     | STY3400 | 99    | STY4906 |
| ATGGCTC + | STY3448 | 100    | HCM1.180 | 62.264 | STY3448 | 99.2  | STY0674 |
|           | STY4631 | 61.165 | STY2548  | 52     | STY4631 | 7.12  | STY2548 |
| ATGAGGT - | STY1898 | 100    | STY3201  | 58.416 | STY1898 | 99.3  | STY3201 |

|           |         |     |          |        |         |       |          |
|-----------|---------|-----|----------|--------|---------|-------|----------|
| ATGACGA + | STY2530 | 100 | STY3019  | 59.434 | STY2530 | 99.1  | STY3019  |
| ATGAAAT(- | STY2684 | 100 |          |        | STY2684 | 99.7  |          |
| ATGAATT(+ | STY4809 | 100 | STY0058  | 50.98  | STY4809 | 93.15 | STY0058  |
| ATGACCG + | STY2914 | 100 | STY3537  | 69.231 | STY2914 | 99.1  | STY3967  |
| ATGCCTG - | STY4868 | 100 | STY0931  | 62.136 | STY4868 | 98.6  | STY0931  |
| ATGTTTA(- | STY4944 | 100 | STY4772  | 61     | STY4944 | 98.5  | STY0435  |
|           | STY4143 | 100 |          |        | STY4143 | 97.3  |          |
| ATGACGC + | STY1297 | 100 | STY1285  | 66.667 | STY1297 | 99.8  | STY1285  |
| ATGATTA(- | STY1368 | 100 | STY4087  | 63.462 | STY1368 | 98.7  | STY4169  |
| ATGACCG - | STY3825 | 100 | STY3756  | 66.99  | STY3825 | 99.9  | STY3756  |
| ATGACGA + | STY3882 | 100 | STY1670  | 62.5   | STY3882 | 98.2  | STY1670  |
| ATGACTC - | STY0848 | 100 | STY4790  | 61.765 | STY0848 | 98.6  | STY4790  |
| GTGACTA + | STY0830 | 100 | STY2593  | 60.577 | STY0830 | 99.1  | STY0709  |
| ATGATCA(- | STY0104 | 100 | STY4087  | 66.337 | STY0104 | 98.4  | STY3355  |
| ATGAAAA(- | STY3836 | 100 | STY3837  | 69     | STY3836 | 98.9  | STY3837  |
| GTGAAGC - | STY0692 | 100 | STY4767  | 91.176 | STY0692 | 99.8  | STY0498  |
| ATGAATC(- | STY0282 | 100 | STY0984  | 60     | STY0282 | 98.1  | STY0984  |
| ATGGAAT + | STY0978 | 100 | STY0408  | 64.486 | STY0978 | 98.7  | STY0408  |
| ATGAAGA - | STY2585 | 100 | STY2584  | 85     | STY2585 | 99    | STY2584  |
| ATGCGCT + | STY2871 | 100 | STY1731  | 58     | STY2871 | 100   | STY1731  |
| ATGAAAA + | STY0068 | 100 | STY0672  | 66.337 | STY0068 | 99    | STY0672  |
| ATGGTCG + | STY0394 | 99  | STY2807  | 55.882 | STY0394 | 98.7  | STY2807  |
| ATGCCAC - | STY1986 | 100 | STY0979  | 60.952 | STY1986 | 98.8  | STY3894  |
| ATGACCA + | STY4209 | 100 | STY1549  | 67     | STY4209 | 97.8  | STY1549  |
|           | STY0750 | 100 | STY2807  | 84     | STY0750 | 99.1  | STY2807  |
| ATGATCA(- | STY4501 | 100 | STY2904  | 63.81  | STY4501 | 99    | STY0675  |
| ATGGATT(+ | STY2144 | 100 | STY1820  | 53.398 | STY2144 | 70.57 | STY1820  |
| ATGAGCG + | STY1377 | 100 | STY3764  | 63.462 | STY1377 | 98.1  | STY3251  |
| ATGATTA(- | STY2830 | 100 | STY1240  | 63.107 | STY2830 | 98.8  | STY3901  |
| ATGCCGC - | STY1176 | 100 | STY0033  | 65     | STY1176 | 99.3  | STY0891  |
| ATGACCA + | STY3096 | 100 | STY2496  | 72     | STY3096 | 98.7  | STY2496  |
|           | STY4835 | 95  | STY0602a | 63     | STY4835 | 93.2  | STY0602a |
|           | STY3724 | 95  | STY0550  | 49     | STY3724 | 77.13 | STY3389  |
| ATGGACC + | STY4338 | 99  | STY0814  | 60.748 | STY4338 | 90.21 | STY0710  |
| ATGACAG - | STY3475 | 100 | STY2765  | 61.682 | STY3475 | 99.03 | STY2765  |
| ATGAACA + | STY2257 | 100 | STY2698  | 71     | STY2257 | 95.1  | STY2698  |
| ATGAGTT(+ | STY4477 | 100 | STY3841  | 66.337 | STY4477 | 97.9  | STY2270  |
| ATGACTG + | STY2183 | 99  | STY0111  | 69     | STY2183 | 98.9  | STY0111  |
| ATGTCGA - | STY1549 | 100 | STY4209  | 69     | STY1549 | 98.7  | STY4209  |
| ATGATTA(- | STY3744 | 100 | STY2434  | 66.337 | STY3744 | 99.1  | STY2434  |
| ATGCTCG + | STY0655 | 100 | STY3732  | 66.019 | STY0655 | 98.5  | STY0956  |
| ATGATGT + | STY1306 | 100 | STY4170  | 66.667 | STY1306 | 98.7  | STY4170  |
| ATGGCTC + | STY3798 | 100 | STY3149  | 65.686 | STY3798 | 99.5  | STY4478  |
| ATGACAA + | STY3592 | 100 | STY1755  | 67     | STY3592 | 98.5  | STY2311  |
| ATGGACC - | STY3608 | 100 | STY3642  | 67     | STY3608 | 98.8  | STY3642  |
| ATGATCC + | STY0100 | 100 | STY4340  | 59.223 | STY0100 | 98.52 | STY4340  |
| ATGCTTA(- | STY3215 | 100 | STY1318  | 65     | STY3215 | 99.5  | STY4044  |
| ATGTCTA(+ | STY2179 | 100 | STY2891  | 69     | STY2179 | 98.9  | STY2891  |
| ATGAGTA + | STY2666 | 100 | STY2677  | 76.238 | STY2666 | 98.9  | STY2677  |
| ATGATTT(+ | STY2668 | 100 | STY3144  | 69     | STY2668 | 99.4  | STY3144  |
| ATGCATT(- | STY1333 | 100 | STY3554  | 66     | STY1333 | 99.9  | STY0551  |
| ATGCAGT - | STY3080 | 100 | STY0642  | 53     | STY3080 | 99.1  | STY0642  |

|           |         |        |          |        |         |       |          |
|-----------|---------|--------|----------|--------|---------|-------|----------|
| ATGTCCA + | STY3077 | 100    | STY4894  | 71.028 | STY3077 | 98.9  | STY4894  |
| ATGTATA + | STY3866 | 100    | STY3744  | 91     | STY3866 | 98.4  | STY3384  |
| ATGCGTA - | STY2121 | 100    | STY4816  | 59     | STY2121 | 97.26 | STY4816  |
| GTGGAAC + | STY1409 | 100    | STY0204  | 61.765 | STY1409 | 99.3  | STY2315  |
| TTGATGG + | STY1509 | 100    |          |        | STY1509 | 72.57 |          |
| GTGGATA + | STY1922 | 100    | STY1410  | 63.81  | STY1922 | 87.09 | STY1815  |
| GTGACCA + | STY1959 | 100    | STY4014  | 64     | STY1959 | 99.4  | STY4014  |
| ATGATGC - | STY1984 | 100    | STY3030  | 67     | STY1984 | 98.9  | STY3030  |
| GTGAAGC - | STY2108 | 100    | STY3954  | 58.491 | STY2108 | 99.1  | STY3954  |
| ATGCTTG - | STY0921 | 100    | STY0922  | 72     | STY0921 | 98.7  | STY0922  |
| ATGAGTG + | STY0568 | 100    | STY3946  | 62.745 | STY0568 | 98.1  | STY3946  |
| ATGTTTG - | STY1000 | 100    | STY4444  | 65.347 | STY1000 | 99.4  | STY4444  |
| ATGCCAT + | STY0632 | 100    | STY4936  | 60     | STY0632 | 98.4  | STY4936  |
| ATGTCCC - | STY0371 | 100    | STY4941  | 65     | STY0371 | 98.5  | STY0026  |
| GTGTGCA - | STY1507 | 100    | STY4221  | 64.078 | STY1507 | 96.55 | STY4221  |
| GTGATAG + | STY1304 | 100    | STY1384  | 77     | STY1304 | 99    | STY1384  |
| ATGAATA + | STY1913 | 100    | STY1523  | 86     | STY1913 | 99.2  | STY1523  |
| ATGCAAA + | STY1957 | 100    | STY0511  | 69.903 | STY1957 | 92.7  | STY0376  |
| ATGCAAA + | STY1419 | 100    | STY3896  | 72     | STY1419 | 98.2  | STY4112  |
| ATGAAAC - | STY1385 | 100    | STY3017  | 60     | STY1385 | 98.2  | STY3017  |
| ATGTTTA(- | STY0543 | 100    | STY3821  | 62.5   | STY0543 | 96.95 | STY3821  |
| ATGAACG + | STY3124 | 100    | STY1750  | 70     | STY3124 | 98.8  | STY1750  |
|           | STY4611 | 83     | STY1072  | 60     | STY4611 | 22.02 | STY4387  |
| ATGAAAA - | STY0291 | 100    |          |        | STY0291 | 98.2  |          |
| GTGGCAC + | STY0446 | 100    |          |        | STY0446 | 99.5  |          |
| ATGAGTC - | STY3319 | 100    | STY3447  | 62.5   | STY3319 | 99.5  | STY3447  |
| ATGACTG - | STY2951 | 100    | STY1547  | 67     | STY2951 | 99.2  | STY1547  |
| ATGGCTG - | STY4164 | 100    | STY2425  | 66.019 | STY4164 | 96.4  | STY3891  |
|           | STY0285 | 62.136 | STY4202  | 62.037 | STY4202 | 17.27 | STY2960  |
| ATGAATC(- | STY4057 | 100    | STY2809  | 60.194 | STY4057 | 97.5  | STY2809  |
|           | STY3684 | 63.107 | STY3819  | 62     | STY3819 | 43.23 | STY3684  |
| ATGAGTG - | STY3152 | 100    | STY3777  | 61.165 | STY3152 | 97.74 | STY3777  |
| ATGTCCT(- | STY3236 | 100    | STY2711  | 85     | STY3236 | 98.6  | STY2711  |
| GTGACTG - | STY2967 | 100    | STY3318  | 61.765 | STY2967 | 98.9  | STY3318  |
| ATGGCGA + | STY4155 | 100    | STY2452  | 63.107 | STY4155 | 99.6  | STY4318  |
| ATGACGA + | STY4116 | 100    | STY1467  | 77     | STY4116 | 97.6  | STY2911  |
| ATGACGC + | STY4017 | 100    | STY4785  | 75.248 | STY4017 | 98.7  | STY4785  |
| ATGAAAG + | STY3119 | 100    | STY2653  | 61.538 | STY3119 | 99    | STY2653  |
| ATGCGTA - | STY3177 | 98     | STY0031  | 63     | STY3177 | 69.94 | STY0031  |
| ATGGGTT - | STY2435 | 100    | STY3625  | 73     | STY2435 | 99.4  | STY3625  |
|           | STY4611 | 50     | STY1637  | 49     | STY4611 | 4.02  | STY1637  |
| ATGCGGC - | STY2444 | 100    | STY2299  | 63.107 | STY2444 | 98.2  | STY2299  |
| ATGAAAA - | STY4063 | 100    | STY0689  | 65.049 | STY4063 | 98.65 | STY3152  |
| ATGGAAA + | STY4363 | 100    | HCM2.005 | 89.109 | STY4363 | 100   | HCM2.005 |
| ATGCGTA + | STY4721 | 100    | STY2739  | 60.396 | STY4721 | 99.6  | STY4741  |
| ATGCGCC + | STY4384 | 100    | STY2758  | 47.573 | STY4384 | 100   | STY2758  |
| ATGCGTG + | STY0937 | 100    | STY3768  | 53.465 | STY0937 | 99.3  | STY3768  |
| ATGGGTA + | STY4723 | 100    | STY2200  | 56.436 | STY4723 | 99.1  | STY2200  |
| ATGAAAA - | STY3429 | 100    | STY2730  | 79     | STY3429 | 98.6  | STY3097  |
| GTGAACA - | STY3320 | 100    | STY0963  | 81     | STY3320 | 99    | STY0963  |
| ATGACAC + | STY2954 | 100    | STY3731  | 62.963 | STY2954 | 97.9  | STY0544  |
| ATGCCTT + | STY4785 | 100    | STY4017  | 71     | STY4785 | 98.7  | STY4017  |



|           |          |        |          |         |               |
|-----------|----------|--------|----------|---------|---------------|
| GTGGCAA + | STY4926  | 100    |          | STY4926 | 98.3          |
|           | STY0544  | 80     | STY0746  | 72      | STY0544 50.67 |
| GTGAAGA - | STY2966  | 100    | STY1611  | 60.396  | STY2966 94.56 |
| ATGCACA + | STY2443  | 100    | STY4008  | 57.282  | STY2443 98.9  |
| ATGACAG - | STY2300  | 100    | STY2657  | 88      | STY2300 98.9  |
| ATGAAAG - | STY2302  | 100    | STY2302  | 61.165  | STY2302 99.5  |
| ATGAAAC - | STY2381  | 100    | STY2642  | 60.194  | STY2381 100   |
| ATGAGTC + | STY1287  | 100    | STY1489  | 81      | STY1287 96.12 |
| ATGAAAG - | STY4130  | 100    | STY3926  | 58      | STY4130 98.2  |
| ATGCTTT(- | STY4236  | 100    | STY3766  | 63.107  | STY4236 100   |
| ATGACTA(- | STY3516  | 100    | STY4115  | 66.99   | STY3516 99.4  |
| ATGGAAC + | STY3406  | 100    | STY3334  | 78      | STY3406 98.2  |
| ATGGTGC - | STY1718  | 100    | STY0765  | 61.386  | STY1718 99.3  |
| ATGGCGC + | STY1152  | 100    | STY2842  | 61.165  | STY1152 98    |
| ATGAACA + | STY0824  | 100    | STY1536  | 84      | STY0824 98.1  |
| ATGAATA - | STY0878  | 100    | STY2218  | 78      | STY0878 99.9  |
| ATGAGCC - | STY3213  | 100    | STY0717  | 64.706  | STY3213 98.6  |
| ATGGGCA + | STY1137  | 100    | STY3479  | 61.765  | STY1137 98.5  |
| ATGCGGC + | STY0820  | 100    |          | STY0820 | 98.4          |
| ATGCGGT + | STY0865  | 100    | STY1835  | 65.347  | STY0865 98.7  |
| ATGAAGA + | STY1463  | 100    | STY4267  | 59      | STY1463 98.7  |
| ATGCAGC + | STY3438  | 100    | STY2442  | 80      | STY3438 99    |
| ATGAAAC + | STY3365  | 100    | STY3443  | 61.538  | STY3365 99.3  |
| ATGAATA(- | STY2706  | 100    | STY2260  | 72      | STY2706 98.5  |
| ATGGAAT - | STY2534  | 100    | STY3529  | 66.981  | STY2534 99.6  |
| ATGTAA +  | STY3916  | 100    | STY2984  | 64.078  | STY3916 98.7  |
| ATGCCGA - | STY0463  | 100    | HCM2.006 | 73.394  | STY0463 100   |
| ATGAGCA + | STY2930  | 100    | STY0156  | 57.692  | STY2930 98.4  |
| ATGCAAA + | STY0496  | 100    | STY1909  | 62.745  | STY0496 99    |
|           | STY3533  | 94     | STY0065  | 81      | STY3533 67.94 |
| ATGGCAG + | STY4369  | 100    | STY1305  | 57.426  | STY4369 99.7  |
| ATGACCG + | STY4367  | 100    | STY2109  | 58.252  | STY4367 100   |
| ATGCGCC + | STY4760  | 100    |          | STY4760 | 99            |
| ATGAAAA - | STY2382  | 100    | STY1070  | 59.804  | STY2382 100   |
| ATGAATT(- | STY2139  | 97     | STY3126  | 60.577  | STY2139 93.4  |
| ATGAAAA + | STY1086  | 99     |          | STY1086 | 97.9          |
| GTGCGCC + | STY2846  | 100    | STY1684  | 41      | STY2846 100   |
| GTGAAGT + | STY1679  | 100    | STY4444  | 61.905  | STY1679 99.2  |
| ATGAAAA - | STY3774  | 100    | STY3738  | 66.667  | STY3774 100   |
| ATGGACA - | STY4500a | 99     | STY2269  | 57.426  | STY4500a 98.1 |
| ATGACAG + | STY0491  | 100    | STY0943  | 64.078  | STY0491 98.8  |
| ATGGCCG - | STY1323  | 100    | STY1548  | 85.437  | STY1323 100   |
| ATGGGAA - | STY1849  | 100    | STY4744  | 62.745  | STY1849 99.5  |
|           | STY4610  | 98     | STY2633  | 65.347  | STY4610 85.81 |
| ATGAATG - | STY0262  | 100    | STY4111  | 61.905  | STY0262 96.92 |
| ATGAAAA(- | STY0017  | 100    | STY0038  | 65      | STY0017 98.6  |
| GTGAGTC - | STY2477  | 96.386 | STY3962  | 96.386  | STY2477 96.39 |
| ATGCTAA + | STY0391  | 100    |          | STY0391 | 100           |
| ATGACAC - | STY1125  | 98     | STY3635  | 50      | STY1125 98.2  |
| ATGACGG - | STY4246  | 100    | STY0221  | 48.571  | STY4246 100   |
| ATGATGA + | STY1982  | 100    | STY2911  | 50      | STY1982 99.6  |

|            |          |        |          |        |          |       |          |
|------------|----------|--------|----------|--------|----------|-------|----------|
|            | STY4097  | 57     | STY4705  | 49     | STY4097  | 17.25 | STY4705  |
|            | STY0114  | 61.765 | STY4522  | 56.863 | STY0114  | 54.28 | STY4522  |
|            | STY0901  | 57.944 |          |        | STY0901  | 3.91  |          |
|            | STY3510  | 63.725 | STY3749  | 61.905 | HCM1.145 | 7.79  | STY3749  |
|            | STY0593  | 62.136 | STY0207  | 58.182 | STY0207  | 13.61 | STY0593  |
|            | STY3586  | 62.037 | STY1262  | 43     | STY3586  | 7.89  | STY1262  |
|            | STY4563  | 58.824 | STY0321  | 58.716 | STY0321  | 11.18 | STY4563  |
|            | HCM1.215 | 82     | STY2866  | 58.824 | HCM1.215 | 28.91 | STY2866  |
|            | STY1159  | 61.905 | STY0310  | 56.19  | STY1159  | 22.8  | STY0310  |
|            | STY4090  | 60.577 | STY4339  | 58.095 | STY4339  | 17.28 | STY4090  |
|            | STY3199  | 52.941 |          |        | STY3199  | 19.01 |          |
| ATGAATA, + | STY0750  | 100    | STY2807  | 84     | STY0750  | 99.2  | STY2807  |
|            | STY0801  | 100    | STY2857  | 71.287 | STY0801  | 99.2  | STY1763  |
| GTGCCGC +  | STY0887  | 100    | STY1309  | 74     | STY0887  | 99.5  | STY4172  |
|            | STY2296  | 60.396 | HCM1.87  | 59.406 | HCM1.87  | 11.18 | STY2296  |
|            | STY0924  | 100    | STY2159  | 71.569 | STY0924  | 99.7  | STY2159  |
| ATGGCGC -  | STY2052  | 100    | STY1034  | 70     | STY2052  | 100   | STY1034  |
| ATGCAAT, + | STY3614  | 100    | STY4756  | 67     | STY3614  | 100   | STY4756  |
| ATGTATA, - | STY2355  | 100    | STY2355  | 49.505 | STY2355  | 100   | STY2355  |
| GTGCCCA -  | STY2756  | 100    | STY2758  | 74     | STY2756  | 100   | STY2760  |
| ATGCTTA, - | STY3006  | 100    | STY4413  | 63.107 | STY3006  | 100   | STY0767  |
| ATGTTGT, - | STY0206  | 100    | STY3087  | 65.385 | STY0206  | 100   | STY0372  |
| ATGAAAA, - | STY2104  | 100    | STY2275  | 63.462 | STY2104  | 100   | STY2275  |
| TTGATGT -  | STY2357  | 100    | HCM1.262 | 68.868 | STY2357  | 100   | HCM1.262 |
|            | STY2761  | 100    |          |        | STY2761  | 100   |          |
| ATGAGCT -  | STY3065  | 100    |          |        | STY3065  | 100   |          |
| ATGCCAA +  | STY0295  | 100    | STY2432  | 26.263 | STY0295  | 100   | STY2432  |
| ATGAAAA, + | STY0332  | 100    | STY0333  | 77.228 | STY0332  | 100   | STY0333  |
| ATGCCGA -  | STY2350  | 100    | STY0920  | 60.194 | STY2350  | 100   | STY2058  |
| ATGACGT -  | STY2731  | 100    | STY0717  | 60.396 | STY2731  | 100   | STY0717  |
| ATGGCTC -  | STY2888  | 100    | STY3696  | 100    | STY2888  | 100   | STY3696  |
| ATGAAAA, + | STY1364  | 100    | STY1362  | 71     | STY1364  | 100   | STY1362  |
| ATGATAT, - | STY1600  | 100    | STY3196  | 65.347 | STY1600  | 100   | STY0798  |
| ATGAGCC +  | STY1617  | 100    | STY2806  | 53.398 | STY1617  | 100   | STY2806  |
| TTGAAAG +  | STY2749  | 100    | STY4352  | 63.107 | STY2749  | 100   | STY0188  |
| ATGACAA +  | STY3924  | 100    | STY3361  | 60.396 | STY3924  | 100   | STY3361  |
| ATGCGTA +  | STY1413  | 100    | STY3104  | 61.165 | STY1413  | 100   | STY3104  |
| ATGAAAT(-  | STY1602  | 100    | STY0363  | 72     | STY1602  | 100   | STY0363  |
| ATGTCAG +  | STY1619  | 100    | STY3712  | 66     | STY1619  | 100   | STY3712  |
| ATGGCTG +  | STY1636  | 100    |          |        | STY1636  | 100   |          |
| ATGAAAA, - | STY4630  | 100    | STY0481  | 61.165 | STY4630  | 100   | STY0481  |
| ATGTTAA(+  | STY4535  | 100    |          |        | STY4535  | 100   |          |
| ATGCTTT(+  | STY4566  | 100    |          |        | STY4566  | 100   |          |
| GTGGCCA +  | STY4584  | 100    | STY0648  | 67     | STY4584  | 100   | STY0648  |
| GTGAATT -  | STY4601  | 100    | STY2882  | 89     | STY4601  | 100   | STY2882  |
| ATGTTGT -  | STY4413  | 100    | STY3947  | 69     | STY4413  | 100   | STY3947  |
| ATGAGCC -  | STY4610  | 100    | STY1686  | 67.327 | STY4610  | 100   | STY1686  |
| ATGAATA(-  | STY4637  | 100    | STY1767  | 61.765 | STY4637  | 100   | STY1767  |
| ATGCCTG +  | STY4544  | 100    | STY2595  | 60     | STY4544  | 100   | STY2595  |

|            |          |        |          |        |          |       |          |
|------------|----------|--------|----------|--------|----------|-------|----------|
| ATGAGTA +  | STY4563  | 100    | STY0105  | 92     | STY4563  | 100   | STY0798  |
| ATGAACG -  | STY4580  | 100    | STY0932  | 56.436 | STY4580  | 100   | STY0932  |
| ATGTTTCG - | STY4597  | 100    | STY2205  | 74     | STY4597  | 100   | STY2205  |
| ATGTACA -  | STY1092  | 100    | STY2841  | 59.615 | STY1092  | 99.8  | STY2841  |
| ATGGCTA -  | STY4423  | 100    | STY0186  | 61.165 | STY4423  | 98.3  | STY4256  |
| ATGAGCC -  | STY0164  | 100    | STY2573  | 52.427 | STY0164  | 98.9  | STY2573  |
| ATGATGC +  | STY0195  | 100    | STY3820  | 57     | STY0195  | 97.3  | STY3820  |
| ATGCAGG +  | STY0219  | 100    | STY0634  | 77.451 | STY0219  | 98.1  | STY0634  |
| ATGTGGT -  | STY0273  | 100    | STY0560  | 66.667 | STY0273  | 96.63 | STY0560  |
| ATGCCGAT - | STY3555  | 100    |          |        | STY3555  | 99.1  |          |
| ATGAATA +  | STY0703  | 100    | STY2809  | 76     | STY0703  | 98.75 | STY2809  |
| ATGAGAC -  | STY0722  | 100    | HCM2.010 | 49.505 | STY0722  | 99.4  | HCM2.010 |
|            | STY0206  | 69.608 | STY3919  | 67     | STY0592  | 47.39 | STY4943  |
| ATGAAAC -  | STY3939A | 100    | STY2891  | 58.252 | STY3939A | 100   | STY2891  |
| ATGACTA +  | STY3925  | 100    | STY2439  | 80     | STY3925  | 98    | STY2439  |
|            |          |        |          |        |          |       |          |
| ATGAAAA -  | STY3933  | 100    | STY2023  | 62.745 | STY3933  | 98.4  | STY2023  |
| ATGAACA -  | STY3894  | 100    | STY3236  | 75.248 | STY3894  | 99.1  | STY3236  |
| ATGCTAA -  | STY4082  | 100    | STY2294  | 59.615 | STY4082  | 98.6  | STY2294  |
| GTGAAA +   | STY0248  | 100    | STY3247  | 87     | STY0248  | 99.8  | STY3247  |
| ATGATCA +  | STY0141  | 100    | STY1089  | 62.136 | STY0141  | 98.6  | STY4881  |
|            | STY0343  | 87     | STY0329  | 84     | STY4848  | 57.4  | STY0343  |
| ATGTATG +  | STY2910  | 100    | STY0663  | 64.356 | STY2910  | 98.7  | STY0663  |
| ATGCATA +  | STY1583  | 100    | STY0616  | 66.038 | STY1583  | 98.5  | STY0616  |
| ATGGAAT +  | STY4359  | 100    | STY3397  | 57.009 | STY4359  | 99.8  | STY3397  |
| ATGTTTA -  | STY4316  | 100    | STY1167  | 71.287 | STY4316  | 98.2  | STY1167  |
| ATGGCGA -  | STY4288  | 100    | STY4875  | 86     | STY4288  | 91.2  | STY4875  |
|            | STY4387  | 65     | STY3788  | 55.238 | STY4387  | 24.07 | STY3788  |
| ATGCGTG -  | STY4335  | 100    |          |        | STY4335  | 67.93 |          |
| ATGCCGC -  | STY4298  | 100    |          |        | STY4298  | 98.23 |          |
| ATGACAA +  | STY1867  | 100    | STY3061  | 61.538 | STY1867  | 100   | STY3061  |
| ATGAGCA -  | STY1829  | 100    | STY0043  | 68     | STY1829  | 98.5  | STY3593  |
| ATGATGA -  | STY2331  | 100    |          |        | STY2331  | 98.7  |          |
|            |          |        |          |        |          |       |          |
| ATGGCTG +  | STY4257  | 100    | STY4426  | 77     | STY4257  | 98.1  | STY0467  |
| ATGAGAC -  | STY2333  | 100    | STY0146  | 90     | STY2333  | 99.2  | STY3762  |
| GTGGATC -  | STY4616  | 99     | STY3686  | 93     | STY4616  | 96.2  | STY3686  |
| ATGCCCC +  | STY0310  | 100    | STY2123  | 74     | STY0310  | 95.52 | STY2123  |
| ATGCCCA +  | STY0358  | 100    |          |        | STY0358  | 99.4  |          |
| ATGTCTC -  | STY2324  | 100    | STY3596  | 71.698 | STY2324  | 99.1  | STY3596  |
|            |          |        |          |        |          |       |          |
|            | STY3781  | 62.376 | STY3380  | 61.538 | STY3380  | 20.61 | STY3781  |
|            | HCM2.005 | 63.107 | STY3513  | 62.727 | HCM2.005 | 20.38 | STY3513  |
| ATGCATA +  | STY1106  | 100    | STY4087  | 83.168 | STY1106  | 97.1  | STY2494  |
| ATGAAAG +  | STY0902  | 100    | STY0854  | 58     | STY0902  | 96.73 | STY0854  |
|            | STY4221  | 61.818 |          |        | STY4221  | 15.93 |          |
|            | STY3305  | 51.456 |          |        | STY3305  | 9.01  |          |
| ATGAAGG -  | STY0928  | 100    | STY2499  | 71     | STY0928  | 99.4  | STY2499  |
| ATGAAAT -  | STY2789  | 100    | STY1750  | 64.706 | STY2789  | 99.2  | STY1750  |
|            | STY1256  | 41.584 | STY0329  | 38     | STY1256  | 7.68  | STY0329  |
| TTGCCCA -  | STY2752  | 100    | STY0163  | 64     | STY2752  | 97.9  | STY0163  |

|            |         |        |           |        |         |       |         |
|------------|---------|--------|-----------|--------|---------|-------|---------|
| ATGTCAT +  | STY0987 | 100    | STY2870   | 59.615 | STY0987 | 97.6  | STY2870 |
|            | STY4276 | 59.048 |           |        | STY4276 | 6.03  |         |
|            | STY1623 | 58     |           |        | STY1623 | 31.17 |         |
| ATGAGTT -  | STY2973 | 100    | STY0572   | 61.905 | STY2973 | 98.1  | STY0572 |
| ATGGCAT +  | STY3047 | 100    | STY0643   | 63.107 | STY3047 | 98.6  | STY4843 |
| ATGTCCC +  | STY2711 | 100    | STY3236   | 87     | STY2711 | 98.8  | STY3236 |
| ATGCTCA +  | STY0943 | 100    | STY2849   | 71.845 | STY0943 | 98.9  | STY0294 |
| ATGGAAC +  | STY0991 | 100    | STY3789   | 63.462 | STY0991 | 98.1  | STY3789 |
|            | STY4617 | 54.455 |           |        | STY4617 | 9.68  |         |
|            | STY0803 | 65.347 | STY3810   | 65.049 | STY1636 | 26.17 | STY1958 |
| ATGCAGC +  | STY4439 | 100    | STY2179   | 57     | STY4439 | 98.4  | STY2404 |
| ATGATGA +  | STY4781 | 100    | STY1330   | 60.396 | STY4781 | 99.7  | STY1330 |
| ATGAACA -  | STY2548 | 100    | STY2973   | 66     | STY2548 | 97.8  | STY2547 |
| ATGCTGG -  | STY2574 | 99     | STY1448   | 65.049 | STY2574 | 98.9  | STY4741 |
| ATGAAAA +  | STY1153 | 100    | STY1446   | 70     | STY1153 | 98.6  | STY1446 |
| ATGCTGA -  | STY1861 | 100    | STY0123   | 62.745 | STY1861 | 98.1  | STY0707 |
| ATGGAAC -  | STY1148 | 100    | STY0013   | 69     | STY1148 | 99.6  | STY0013 |
| ATGGTAG -  | STY1088 | 100    | STY4304   | 63     | STY1088 | 99    | STY4304 |
| ATGCAAG -  | STY2761 | 100    | HCM1.34c  | 61.538 | STY2761 | 93.2  | STY2857 |
| ATGCGTA +  | STY0031 | 99     | STY4938   | 64     | STY0031 | 97.5  | STY0589 |
| GTGCCGC -  | STY2194 | 100    | STY2005   | 67.327 | STY2194 | 70.61 | STY4904 |
| ATGAAGA +  | STY2275 | 100    |           |        | STY2275 | 96.6  |         |
| ATGAAAA +  | STY2504 | 100    | STY4841   | 62.5   | STY2504 | 77.86 | STY4841 |
| TTGGCAG -  | STY2196 | 100    |           |        | STY2196 | 98.7  |         |
| ATGAAAC -  | STY2278 | 100    | STY3415   | 69     | STY2278 | 99.1  | STY3415 |
| ATGAAAG -  | STY2509 | 100    | STY0754   | 62.264 | STY2509 | 98.7  | STY0754 |
| ATGGACA +  | STY2545 | 100    | STY4928   | 59.804 | STY2545 | 95.15 | STY4928 |
| ATGTATA -  | STY2588 | 100    | STY3097   | 64.035 | STY2588 | 99.3  | STY3097 |
| ATGAAAA +  | STY1227 | 100    | STY4917   | 63.462 | STY1227 | 88.72 | STY0110 |
| ATGCTCG +  | STY1213 | 100    | STY1666   | 61.538 | STY1213 | 98.1  | STY3387 |
| ATGGCTC +  | STY4352 | 100    | HCM1.178: | 66.055 | STY4352 | 99.6  | STY3871 |
| ATGTCTA -  | STY0373 | 100    |           |        | STY0373 | 98.3  |         |
| ATGAAAA +  | STY0184 | 100    | STY0655   | 64.423 | STY0184 | 98.3  | STY0671 |
| ATGTTTCG - | STY0484 | 100    | STY0240   | 62.745 | STY0484 | 99.6  | STY4921 |
| GTGAATA +  | STY4470 | 100    | STY3396   | 62.264 | STY4470 | 98.4  | STY2412 |
| ATGCCGA +  | STY4400 | 100    | STY3342   | 63.303 | STY4400 | 98.9  | STY3342 |
| ATGCACA -  | STY0161 | 100    | STY0494   | 81     | STY0161 | 100   | STY0494 |
| ATGATGA +  | STY2531 | 100    |           |        | STY2531 | 98.4  |         |
|            | STY0661 | 62.963 |           |        | STY0661 | 7.04  |         |
| ATGTCAT +  | STY1686 | 100    | STY2936   | 61.765 | STY1686 | 99.1  | STY2936 |
| ATGACCC +  | STY0435 | 100    | STY2546   | 57.282 | STY0435 | 99.5  | STY2546 |
| ATGAGTT -  | STY1709 | 100    | STY1710   | 100    | STY1709 | 70.43 | STY1710 |
| ATGGATG -  | STY4424 | 100    | STY4318   | 63.462 | STY4424 | 99    | STY4255 |
| ATGCTGG +  | STY0367 | 100    | STY2476   | 65.686 | STY0367 | 98.1  | STY2476 |
| ATGGCCC -  | STY0188 | 100    | STY3779   | 63     | STY0188 | 99.3  | STY3779 |
| ATGATTA +  | STY2208 | 100    | STY4194   | 70.476 | STY2208 | 99.1  | STY1106 |
| ATGACAA -  | STY2644 | 100    | STY1781   | 63.725 | STY2644 | 98.7  | STY3298 |
| ATGATCT -  | STY2537 | 100    | STY0080   | 57     | STY2537 | 98.6  | STY0080 |
| ATGCGTC +  | STY2525 | 100    | STY3195   | 66.337 | STY2525 | 98.8  | STY3195 |
| ATGCATC +  | STY2792 | 100    | STY4762   | 60.396 | STY2792 | 98.9  | STY4762 |
| ATGAAAC -  | STY4811 | 100    | STY0573   | 56     | STY4811 | 99.8  | STY4679 |
| GTGGCG -   | STY0583 | 100    | STY4113   | 61.321 | STY0583 | 98.3  | STY4113 |

|            |         |        |           |        |           |       |           |
|------------|---------|--------|-----------|--------|-----------|-------|-----------|
|            | STY3922 | 63.725 | HCM2.005: | 60.577 | HCM2.005: | 39.43 | STY3922   |
| ATGCCTG -  | STY4917 | 100    | STY1227   | 62.745 | STY4917   | 98.8  | STY1227   |
| ATGAACC +  | STY4095 | 100    | STY0619   | 69.608 | STY4095   | 99.7  | STY0619   |
| ATGACTA. + | STY4193 | 100    | STY3447   | 69.307 | STY4193   | 98.5  | STY0911   |
| ATGTCAC +  | STY4282 | 100    | STY4276   | 76     | STY4282   | 98    | STY4276   |
| ATGATTT/ + | STY2647 | 100    | STY0460   | 67     | STY2647   | 98.5  | STY0460   |
| ATGTCGT +  | STY2721 | 100    | STY3753   | 59.804 | STY2721   | 98.5  | STY3753   |
| ATGGTAG +  | STY0957 | 100    | STY0018   | 62.264 | STY0957   | 99.8  | STY1005   |
| ATGCAGC +  | STY0618 | 100    | STY2797   | 60.194 | STY0618   | 98.8  | STY2797   |
| ATGACAA -  | STY4776 | 100    | STY2928   | 87     | STY4776   | 99.6  | STY3654   |
| ATGTCTT(-  | STY4897 | 100    | STY2816   | 62.857 | STY4897   | 80.96 | STY2870   |
| ATGCGTC +  | STY4060 | 100    | STY3076   | 71.963 | STY4060   | 98.7  | STY3076   |
| ATGGTTA -  | STY3391 | 100    | STY0810   | 62.376 | STY3391   | 99    | STY4492   |
| ATGAAAA +  | STY3437 | 100    | STY2439   | 70.297 | STY3437   | 99.2  | STY3925   |
| ATGATCC -  | STY4059 | 100    | STY3871   | 88     | STY4059   | 99.2  | STY3871   |
|            | STY4881 | 97     | HCM2.001: | 63.81  | STY4881   | 19.57 | HCM2.001: |
| ATGATGC +  | STY0136 | 100    | STY1357   | 76     | STY0136   | 99.2  | STY1357   |
| ATGCTTT(-  | STY3011 | 100    | STY2697   | 50.98  | STY3011   | 99.1  | STY2697   |
| ATGCAGA +  | STY0779 | 100    | STY0896   | 71.429 | STY0779   | 99    | STY0880   |
| ATGAGCA +  | STY4498 | 100    | STY4043   | 71     | STY4498   | 99.3  | STY4043   |
| ATGAGCA -  | STY2862 | 100    |           |        | STY2862   | 99.8  |           |
| ATGAGCA +  | STY2796 | 100    | STY1567   | 60     | STY2796   | 99.3  | STY1567   |
| ATGAGCT +  | STY2281 | 100    | STY2155   | 79     | STY2281   | 99.2  | STY2155   |
| ATGAATA(-  | STY0365 | 100    | STY2493   | 78.641 | STY0365   | 99    | STY1002   |
| ATGAAAT +  | STY0539 | 100    | STY3765   | 61.538 | STY0539   | 98.6  | STY3765   |
| ATGTACT, + | STY1079 | 100    |           |        | STY1079   | 99.3  |           |
| ATGAAAA(-  | STY4519 | 99     |           |        | STY4519   | 97.3  |           |
| ATGAAAA -  | STY3808 | 100    | STY2681   | 72     | STY3808   | 96.5  | STY2681   |
| ATGAGCC -  | STY0714 | 100    | STY2545   | 49.02  | STY0714   | 98.9  | STY2545   |
| ATGAAAA +  | STY0764 | 100    | STY0219   | 62     | STY0764   | 99.4  | STY0219   |
| ATGGCAG +  | STY2244 | 100    | STY2755   | 58.491 | STY2244   | 98.3  | STY2755   |
| ATGAAAC -  | STY4510 | 100    |           |        | STY4510   | 98.1  |           |
| ATGAGTG -  | STY2159 | 100    | STY2581   | 82     | STY2159   | 98.3  | STY0924   |
| ATGGACA +  | STY1386 | 100    | STY0430   | 64.815 | STY1386   | 98    | STY4196   |
|            | STY4459 | 100    | STY4458   | 66.337 | STY4459   | 97.8  | STY4458   |
| ATGCAGA +  | STY0067 | 100    | STY0673   | 75     | STY0067   | 98.5  | STY0673   |
|            | STY1853 | 94.34  | STY1853   | 53.922 | STY1853   | 95.5  | STY1853   |
| ATGCAAC +  | STY3709 | 100    | STY1226   | 51     | STY3709   | 95    | STY1226   |
| ATGACAG -  | STY2782 | 100    | STY4816   | 71     | STY2782   | 98.5  | STY4816   |
| ATGAATA(+  | STY2247 | 100    | STY2122   | 53.271 | STY2247   | 99.21 | STY2122   |
| ATGTTAT -  | STY4500 | 100    | STY4684   | 68     | STY4500   | 99.1  | STY4684   |
| ATGAAAA -  | STY2140 | 100    | HCM2.005: | 90     | STY2140   | 98.6  | HCM2.005: |
| ATGAGCT +  | STY1234 | 100    | STY1333   | 65.714 | STY1234   | 99.9  | STY2401   |
| ATGACCA +  | STY1400 | 100    | STY3832   | 63     | STY1400   | 98.5  | STY1459   |
| ATGACAT(+  | STY2854 | 100    | STY2855   | 58     | STY2854   | 99.2  | STY2855   |
| ATGCTGA -  | STY0005 | 100    | STY0836   | 65     | STY0005   | 99.5  | STY4054   |
| ATGGAGA -  | STY3988 | 100    | STY0897   | 79     | STY3988   | 99.4  | STY0897   |
| TTGAATC(-  | STY1648 | 100    | STY2295   | 59.223 | STY1648   | 95.8  | STY2295   |
| ATGCAGC +  | STY3839 | 100    | STY1193   | 61     | STY3839   | 99.8  | STY3874   |
| GTGGATA -  | STY3590 | 100    | STY4707   | 74.257 | STY3590   | 99.6  | STY4707   |
| ATGACGC +  | STY3623 | 100    | STY4090   | 66.667 | STY3623   | 98.7  | STY4090   |

|           |         |        |          |        |         |       |          |
|-----------|---------|--------|----------|--------|---------|-------|----------|
| ATGTCTA - | STY3226 | 100    | STY4114  | 58.879 | STY3226 | 98.91 | STY3076  |
| ATGGGCC + | STY2184 | 100    | STY0076  | 60.577 | STY2184 | 99.5  | STY0076  |
| ATGGTTT + | STY2665 | 100    | STY2598  | 66     | STY2665 | 86.24 | STY2598  |
| ATGAATG + | STY1916 | 100    | STY1527  | 65.686 | STY1916 | 99.5  | STY1527  |
| ATGAACA - | STY3468 | 100    | STY0167  | 57.426 | STY3468 | 99    | STY0167  |
| ATGAAAA + | STY3109 | 100    | STY3426  | 72     | STY3109 | 99.5  | STY3426  |
| ATGATTG + | STY3820 | 100    | STY0676  | 64.151 | STY3820 | 98.5  | STY4126  |
| ATGGCTG - | STY3584 | 100    | STY4884  | 56     | STY3584 | 98.5  | STY4884  |
| GTGGCGC - | STY3601 | 100    | STY0730  | 62.745 | STY3601 | 97.94 | STY0730  |
| ATGTCCG + | STY3603 | 100    | STY2101  | 62.136 | STY3603 | 100   | STY2101  |
| ATGCGTC + | STY0533 | 100    | STY0228  | 71     | STY0533 | 98.39 | STY0228  |
| ATGTCTA - | STY3739 | 100    | STY4353  | 100    | STY3739 | 99.4  | STY4353  |
| ATGAGTA + | STY2178 | 100    |          |        | STY2178 | 99.1  |          |
| ATGAGCC - | STY3075 | 100    | STY2616  | 64.151 | STY3075 | 95.66 | STY2616  |
| GTGTCAA - | STY3137 | 100    | STY2341  | 58.416 | STY3137 | 98.2  | STY2341  |
| ATGTTGA + | STY1375 | 100    | STY2494  | 62.5   | STY1375 | 99    | STY2494  |
| ATGCTCA - | STY0547 | 100    | STY2236  | 62.5   | STY0547 | 99.2  | STY3899  |
| ATGGGAT - | STY0574 | 100    | STY1647  | 63.366 | STY0574 | 99.2  | STY1588  |
|           | STY1960 | 64.356 | STY4015  | 60.748 | STY4015 | 49.8  | STY1960  |
| ATGATCG - | STY1435 | 100    | STY2160  | 65     | STY1435 | 99.3  | STY2160  |
| ATGCAGC - | STY1340 | 100    |          |        | STY1340 | 99.2  |          |
| ATGCACT + | STY1291 | 100    | STY1485  | 79     | STY1291 | 97.9  | STY1485  |
| TTGGATG + | STY1929 | 100    | STY4388  | 61.165 | STY1929 | 98.7  | STY3809  |
| ATGTTTG + | STY1963 | 100    | HCM1.255 | 61.468 | STY1963 | 99.4  | HCM1.255 |
| ATGGACC - | STY1995 | 99     | STY2631  | 90     | STY1995 | 92.27 | STY2631  |
| ATGGCGT - | STY2115 | 100    | STY2697  | 66.337 | STY2115 | 98.9  | STY3933  |
| ATGAAAT + | STY0535 | 100    | STY2562  | 63.208 | STY0535 | 99.2  | STY2562  |
| GTGAATC + | STY1530 | 100    | STY2962  | 64     | STY1530 | 98.9  | STY2962  |
| ATGGACC + | STY1537 | 100    | STY4736  | 66.038 | STY1537 | 98.9  | STY0277  |
| ATGTCCG - | STY0973 | 100    | STY3423  | 88     | STY0973 | 99.1  | STY3423  |
| ATGACGC - | STY0670 | 100    | STY0070  | 86     | STY0670 | 98.6  | STY0070  |
| ATGAATA + | STY1501 | 100    | STY2435  | 57.692 | STY1501 | 99.7  | STY2435  |
| ATGTTGG - | STY1471 | 100    | STY1502  | 62.376 | STY1471 | 98.5  | STY1502  |
| ATGACCA - | STY4205 | 100    | HCM1.158 | 64.078 | STY4205 | 98.7  | HCM1.231 |
| ATGCCGC + | STY4166 | 100    | STY0221  | 80.198 | STY4166 | 98.8  | STY0221  |
|           | STY3186 | 61.386 |          |        | STY3186 | 8.39  |          |
| ATGATGA - | STY4064 | 100    | STY0889  | 75.248 | STY4064 | 98.4  | STY0889  |
| ATGGTCG - | STY3094 | 100    | STY4050  | 70     | STY3094 | 97.6  | STY4050  |
| ATGTCAG + | STY2867 | 100    |          |        | STY2867 | 91.13 |          |
| ATGGAAT + | STY0414 | 100    | STY1191  | 74     | STY0414 | 64.87 | STY1191  |
|           | STY0477 | 100    | STY0478  | 99     | STY0476 | 41.02 | STY0477  |
| ATGAAGA + | STY0507 | 100    | STY1863  | 66.038 | STY0507 | 99.2  | STY2340  |
|           | STY2661 | 58.491 | STY1410  | 50.495 | STY2661 | 7.28  | STY1410  |
| ATGTATA + | STY4138 | 100    | STY4122  | 64.423 | STY4138 | 99.2  | STY3784  |
| ATGCCGC + | STY4105 | 100    | STY0146  | 62.857 | STY4105 | 70.57 | STY0146  |
| ATGCGAC - | STY4745 | 97     | STY2289  | 57.282 | STY4745 | 96.35 | STY2289  |
| ATGATGC + | STY0421 | 100    | STY0631  | 65.741 | STY0421 | 100   | STY1309  |
| ATGCAAT - | STY0460 | 100    | STY2647  | 65     | STY0460 | 98.2  | STY2647  |
| ATGACGC + | STY3333 | 100    | HCM1.123 | 62.5   | STY3333 | 88.63 | STY3769  |
| ATGAGCA - | STY2969 | 100    | STY2557  | 70.297 | STY2969 | 99    | STY2557  |
| ATGAAAC - | STY4134 | 100    | STY4793  | 70.297 | STY4134 | 98.55 | STY0182  |
| ATGATGA - | STY3515 | 100    | STY2337  | 65     | STY3515 | 98.1  | STY4806  |

|           |         |        |         |        |         |       |         |
|-----------|---------|--------|---------|--------|---------|-------|---------|
| ATGAAAC - | STY3446 | 100    | STY0254 | 74.257 | STY3446 | 91.8  | STY0254 |
| ATGGAAC - | STY3326 | 100    | STY2734 | 63.725 | STY3326 | 98.2  | STY2734 |
| ATGTTTG†+ | STY0396 | 100    | STY0218 | 63.551 | STY0396 | 98.06 | STY0218 |
| ATGCTTA,+ | STY2925 | 100    | STY3409 | 63     | STY2925 | 96.46 | STY3409 |
| ATGCATA`- | STY2436 | 100    | STY4114 | 59.615 | STY2436 | 99.2  | STY4058 |
|           | STY0405 | 100    | STY0255 | 56.863 | STY0405 | 46.29 | STY0255 |
| ATGCATC + | STY2413 | 100    | STY3760 | 62.745 | STY2413 | 99.7  | STY3760 |
| ATGAAAA`- | STY2294 | 100    | STY0522 | 59.804 | STY2294 | 98.3  | STY0522 |
| ATGACTG + | STY2370 | 100    | STY1969 | 65.741 | STY2370 | 98.1  | STY1969 |
| ATGCGTG-  | STY2404 | 100    | STY3564 | 67.308 | STY2404 | 98.5  | STY3564 |
| ATGGCAA + | STY4381 | 100    |         |        | STY4381 | 99.7  |         |
| ATGAATA,- | STY2320 | 100    |         |        | STY2320 | 99    |         |
| ATGTCTT†+ | STY2397 | 100    |         |        | STY2397 | 99.6  |         |
| ATGAAAC + | STY0283 | 100    | STY4237 | 61     | STY0283 | 99.2  | STY4237 |
| ATGACTC - | STY4176 | 100    | STY0746 | 64.356 | STY4176 | 99.4  | STYrarB |
| ATGAGTG-  | STY4265 | 100    | STY3951 | 63     | STY4265 | 97.8  | STY3951 |
| ATGGATA - | STY3486 | 100    | STY0007 | 61     | STY3486 | 99.3  | STY0007 |
| ATGAAAT`+ | STY4741 | 99     | STY2574 | 67     | STY4741 | 92    | STY4111 |
| ATGATTG`+ | STY4806 | 100    | STY3515 | 62     | STY4806 | 98.5  | STY3515 |
| ATGAAAT,+ | STY4934 | 100    |         |        | STY4934 | 95.67 |         |
| ATGGCTC + | STY4052 | 100    | STY0638 | 67.619 | STY4052 | 99.4  | STY3124 |
| ATGACCC + | STY3476 | 100    | STY4563 | 86     | STY3476 | 100   | STY3021 |
| ATGAAAT,+ | STY3408 | 100    | STY3467 | 64.423 | STY3408 | 99.5  | STY3493 |
| ATGTTTG`+ | STY3529 | 100    | STY3528 | 76     | STY3529 | 99.3  | STY0231 |
| ATGAACT†+ | STY3445 | 100    | STY3044 | 68     | STY3445 | 99.4  | STY3044 |
| ATGGCTA + | STY3405 | 100    | STY4482 | 60.194 | STY3405 | 99    | STY4482 |
| ATGTATG`+ | STY0677 | 100    | STY4805 | 64.423 | STY0677 | 98.2  | STY4805 |
| ATGAAAC.+ | STY0192 | 100    | STY4267 | 60.396 | STY0192 | 98.3  | STY4267 |
| ATGAATG + | STY0762 | 100    | STY0765 | 59.259 | STY0762 | 98.7  | STY0765 |
| ATGAGCC + | STY4704 | 100    | STY3196 | 62     | STY4704 | 99.3  | STY3196 |
| ATGAAAC - | STY1715 | 100    | STY2520 | 58.416 | STY1715 | 97.8  | STY2520 |
| ATGATGG-  | STY1539 | 100    | STY2479 | 72.277 | STY1539 | 99.7  | STY2479 |
|           | STY4017 | 52     | STY4654 | 50     | STY4017 | 6.15  | STY4654 |
| GTGGGAC + | STY0843 | 100    | STY0841 | 75.238 | STY0843 | 99.1  | STY0841 |
|           | HCM1.87 | 59.406 | STY0981 | 48.571 | HCM1.87 | 9.34  | STY0981 |
|           | STY4878 | 34     |         |        | STY4878 | 20.61 |         |
|           | STY2517 | 60.784 | STY4849 | 52     | STY2517 | 23.29 | STY4849 |
| ATGAAAC + | STY0512 | 100    | STY3774 | 55     | STY0512 | 99.2  | STY3774 |
| ATGACGA - | STY3104 | 100    | STY1413 | 59.434 | STY3104 | 97.9  | STY3332 |
| GTGGCG†+  | STY3242 | 100    | STY2449 | 66     | STY3242 | 52.17 | STY2216 |
|           | STY0765 | 28     |         |        | STY0765 | 15.31 |         |
| ATGGCTG + | STY4469 | 100    | STY3836 | 62.727 | STY4469 | 99.8  | STY4008 |
|           | STY1612 | 79     | STY1336 | 62.136 | STY1612 | 59.72 | STY1336 |
| ATGAATG - | STY4472 | 100    | STY3933 | 62.385 | STY4472 | 99.4  | STY4193 |
|           | STY0308 | 58.095 | STY4234 | 57.009 | STY0308 | 24.59 | STY4234 |
| ATGGCAA + | STY4376 | 99     | STY1515 | 62.037 | STY4376 | 99.4  | STY1515 |
|           | STY1509 | 60.952 | STY1020 | 60.396 | STY1020 | 31.09 | STY1509 |
| ATGGTAA + | STY4912 | 100    | STY4707 | 59.406 | STY4912 | 100   | STY4707 |
| ATGTTTA(- | STY1496 | 100    | STY2260 | 54     | STY1496 | 100   | STY2260 |
| ATGAAAG - | STY4622 | 100    | STY3680 | 96     | STY4622 | 99.5  | STY3680 |
| ATGAAAA`- | STY0672 | 100    | STY0068 | 66.337 | STY0672 | 99.7  | STY0068 |
| ATGGCCA-  | STY0951 | 100    | STY0628 | 52     | STY0951 | 100   | STY0628 |

|           |          |        |          |        |          |       |          |
|-----------|----------|--------|----------|--------|----------|-------|----------|
| ATGACGC - | STY4621  | 100    | STY3681  | 90     | STY4621  | 99.1  | STY3681  |
| ATGAGGT - | STY0162  | 100    | STY2109  | 64.706 | STY0162  | 99.4  | HCM2.012 |
| GTGAATG + | STY0303  | 100    | STY0554  | 64.423 | STY0303  | 99.6  | STY1832  |
| GTGTTAA - | STY0199  | 100    |          |        | STY0199  | 96.6  |          |
| ATGCCAA + | STY0422  | 100    | STY1721  | 35     | STY0422  | 99.5  | STY1721  |
| ATGAAAA + | STY0021  | 100    | STY4431  | 63.208 | STY0021  | 97.6  | STY4945  |
| GTGGCTT - | STY3332a | 100    | STY4578  | 59.406 | STY3332a | 100   | STY4578  |
| ATGTTCG + | STY1983  | 100    | STY4883  | 43     | STY1983  | 99.5  | STY4883  |
| ATGAAAA + | STY1480  | 100    | STY1391  | 69     | STY1480  | 99.5  | STY1391  |
| ATGCAGC + | STY0513  | 100    | STY4721  | 59.804 | STY0513  | 100   | STY4721  |
| ATGTGTG - | STY1968  | 100    |          |        | STY1968  | 100   |          |
| ATGAAAT(- | STY1495  | 100    | STY1149  | 74.757 | STY1495  | 98.6  | STY1149  |
| ATGTTAG + | STY0813  | 100    | STY3109  | 56.311 | STY0813  | 96.15 | STY3109  |
|           | STY0757  | 60.784 |          |        | STY0757  | 8.57  |          |
|           | STY4479  | 60.952 | STY0802  | 57.407 | STY0802  | 31.58 | STY4479  |
|           | STY2504  | 51     | STY3775  | 43     | STY2504  | 20.72 | STY2040  |
|           | STY4661  | 63.208 | STY4064  | 60.194 | STY4661  | 14.9  | STY4064  |
|           | STY0140  | 50.98  |          |        | STY0140  | 4.3   |          |
|           | STY0747  | 66.038 | HCM1.100 | 60.194 | HCM1.100 | 17.11 | STY0747  |
|           | STY3005  | 61.905 |          |        | STY3005  | 35.14 |          |
|           | STY1765  | 59.259 | STY0804  | 32     | STY1765  | 21.66 | STY0804  |
|           | HCM1.243 | 68     | STY2685  | 65.347 | HCM1.243 | 35.59 | STY4303  |
|           | STY4611  | 83     | STY4387  | 59.048 | STY4611  | 29.69 | STY4387  |
|           | STY3624  | 64.356 |          |        | STY3624  | 12.02 |          |
|           | STY0490  | 60.377 |          |        | STY0490  | 11.96 |          |
|           | STY3098  | 100    | STY3099  | 77     | STY3098  | 97.6  | STY3099  |
|           | STY3110  | 100    | STY1956  | 79.208 | STY3110  | 97.9  | STY1956  |
|           | STY4791  | 61.386 | STY3889  | 46     | STY4791  | 7.01  | STY3889  |
| TTGTTGC - | STY1499  | 100    | STY1751  | 56.863 | STY1499  | 100   | STY1751  |
| ATGATTG - | STY1605  | 100    |          |        | STY1605  | 100   |          |
| ATGGGAA + | STY1621  | 100    | STY2479  | 62.376 | STY1621  | 100   | STY2479  |
| ATGAATA + | STY1639  | 100    | STY3692  | 67     | STY1639  | 100   | STY3692  |
| ATGGGGC + | STY2005  | 100    | STY2194  | 69     | STY2005  | 100   | STY4904  |
| ATGGCTA - | STY2028  | 100    | STY1059  | 91     | STY2028  | 100   | STY1059  |
| TTGAGTC + | STY1607  | 100    | HCM1.137 | 54.369 | STY1607  | 100   | HCM1.137 |
| ATGAACG + | STY1623  | 100    | STY0631  | 49.02  | STY1623  | 100   | STY0631  |
| ATGAAAA + | STY1649  | 100    | STY2203  | 89     | STY1649  | 100   | STY2203  |
| ATGAGCA - | STY2007  | 100    | STY0194  | 78.095 | STY2007  | 100   | STY3227  |
| TTGAGCA - | STY2030  | 100    | STY1057  | 87     | STY2030  | 100   | STY1057  |
| ATGGATT - | STY3192  | 100    |          |        | STY3192  | 100   |          |
| ATGAGAT - | STY1014  | 100    | STY4312  | 67     | STY1014  | 100   | STY4312  |
| ATGGTAG + | STY1041  | 100    | STY3458  | 60.377 | STY1041  | 100   | STY3458  |
| ATGGGGC + | STY1057  | 100    | STY2030  | 87     | STY1057  | 100   | STY2030  |
| ATGGAAT + | STY1073  | 100    | STY2013  | 100    | STY1073  | 100   | STY2013  |
| ATGTCAC + | STY3277  | 100    |          |        | STY3277  | 100   |          |
| ATGGAAA - | STY0063  | 100    | STY3531  | 100    | STY3531  | 100   | STY0063  |
|           | STY1043  | 100    | STY4816  | 60.577 | STY1043  | 100   | STY4816  |
| ATGTCTA + | STY1059  | 100    | STY2028  | 91     | STY1059  | 100   | STY2028  |
| ATGGCGA - | STY2034  | 100    | STY1053  | 98     | STY2034  | 100   | STY1053  |



|           |         |     |          |        |         |     |         |
|-----------|---------|-----|----------|--------|---------|-----|---------|
| ATGGTCA + | STY3279 | 100 | HCM1.203 | 64     | STY3279 | 100 | STY1396 |
| ATGTATA + | STY2075 | 100 | HCM1.122 | 59     | STY2075 | 100 | STY1518 |
| TTGAAGT - | STY2353 | 100 | STY0971  | 59.804 | STY2353 | 100 | STY0971 |
| GTGCATG + | STY4524 | 100 | STY3991  | 61.386 | STY4524 | 100 | STY3991 |
| ATGTGTG + | STY4548 | 100 | STY1450  | 64.762 | STY4548 | 100 | STY3000 |
| ATGAGCC + | STY4568 | 100 | STY4467  | 60.396 | STY4568 | 100 | STY4467 |
| ATGAAAG - | STY4585 | 100 | STY4858  | 86     | STY4585 | 100 | STY4858 |
| ATGATGA - | STY4602 | 100 | STY2883  | 85     | STY4602 | 100 | STY2883 |
| ATGTTTA - | STY4414 | 100 | STY2541  | 63     | STY4414 | 100 | STY2541 |
|           | STY3689 | 100 | STY4613  | 100    | STY4613 | 100 | STY3689 |

|            |         |        |          |        |         |       |          |
|------------|---------|--------|----------|--------|---------|-------|----------|
| GTGCCTG +  | STY1906 | 100    | STY4404  | 61.321 | STY1906 | 99.4  | STY2096  |
| ATGCTAA -  | STY0123 | 100    | STY0911  | 78     | STY0123 | 98.3  | STY0911  |
| ATGAGTA -  | STY3519 | 100    | STY1169  | 72     | STY3519 | 99.1  | STY1169  |
| ATGGTGC -  | STY3552 | 100    | STY2973  | 58.252 | STY3552 | 99.8  | STY2973  |
| ATGAATA -  | STY0237 | 100    |          |        | STY0237 | 99    |          |
| ATGACAC -  | STY0720 | 100    | STY1576  | 68.627 | STY0720 | 98.9  | STY1576  |
| CTGGTAA +  | STY3569 | 100    | STY0520  | 86     | STY0520 | 65.3  | STY3569  |
| ATGCTGG +  | STY0260 | 100    | STY3808  | 51.485 | STY0260 | 99.5  | STY3808  |
|            | STY1545 | 100    | STY3353  | 61     | STY1545 | 80.69 | STY3353  |
| ATGAAAA -  | STY2172 | 100    | STY2960  | 66     | STY2172 | 96.48 | STY2960  |
| ATGATCA -  | STY4085 | 100    | STY2109  | 62.745 | STY4085 | 99.4  | STY2109  |
| ATGAAAA -  | STY2229 | 100    | STY0635  | 65     | STY2229 | 98.5  | STY0635  |
| ATGAAAA +  | STY2171 | 100    | STY4484  | 90     | STY2171 | 98.7  | STY4484  |
| ATGCTAA -  | STY2236 | 100    | STY2480  | 62.745 | STY2236 | 99    | STY4000  |
| ATGTTTCG - | STY2205 | 100    | STY2466a | 83     | STY2205 | 98.7  | STY4597  |
| ATGAGTG +  | STY0055 | 100    | STY0699  | 61     | STY0055 | 98.6  | STY0699  |
| ATGAAAA -  | STY0095 | 100    | STY1058  | 58.416 | STY0095 | 99    | STY1058  |
| ATGCAAA -  | STY3490 | 100    | STY0183  | 65.049 | STY3490 | 99.5  | STY3888  |
|            | STY3792 | 65.421 | STY1134  | 63.366 | STY1942 | 11.69 | STY1134  |
| ATGAGGA +  | STY1087 | 100    | STY1392  | 55.34  | STY1087 | 99.4  | STY1392  |
| ATGATGA +  | STY1143 | 100    | STY0747  | 62.745 | STY1143 | 98.59 | STY4156  |
| ATGAATA +  | STY1188 | 100    | STY4466  | 61.905 | STY1188 | 98.9  | STY4466  |
| ATGGGCA +  | STY1239 | 100    | STY0507  | 60.377 | STY1239 | 99.7  | STY2271  |
| ATGTATT +  | STY1260 | 100    | STY3785  | 62.376 | STY1260 | 98.8  | STY0426  |
| ATGAAAA +  | STY1168 | 100    | STY3821  | 65     | STY1168 | 99.2  | STY3821  |
| ATGAAAA +  | STY1226 | 100    | STY3550  | 76     | STY1226 | 98.5  | STY3550  |
| GTGAATA +  | STY1252 | 100    | STY1843  | 61.165 | STY1252 | 98.9  | STY1843  |
|            | STY2522 | 67     | STY4459  | 62.745 | STY2522 | 43.06 | STY1972  |
| ATGAAAA -  | STY4239 | 100    | STY4021  | 58.416 | STY4239 | 99.2  | STY4021  |
| ATGCCGT +  | STY4918 | 100    | STY3128  | 55     | STY4918 | 99.5  | STY3128  |
| ATGACGC -  | STY1857 | 100    | STY3502  | 55     | STY1857 | 98.6  | STY3502  |
| ATGATTA +  | STY1827 | 100    | STY1690  | 61.905 | STY1827 | 99.3  | STY1690  |
|            | STY4106 | 50.495 |          |        | STY4106 | 8.88  |          |
| ATGCGAC +  | STY0002 | 100    | STY3768  | 68.317 | STY0002 | 98.8  | STY4416  |
|            | STY2353 | 62.5   | STY0203  | 62.385 | STY2353 | 10.17 | HCM1.190 |
|            | STY4322 | 59.048 | STY3309  | 59     | STY3309 | 9.27  | STY4322  |
| ATGAGTC -  | STY4902 | 100    | STY1218  | 68.317 | STY4902 | 99.8  | STY1218  |

|          |         |        |         |        |         |       |         |
|----------|---------|--------|---------|--------|---------|-------|---------|
| ATGCGCA+ | STY4936 | 100    | STY2343 | 93     | STY4936 | 98.9  | STY2343 |
| ATGGCAG+ | STY0317 | 100    | STY0318 | 73     | STY0317 | 83.32 | STY2184 |
|          | STY0329 | 93     | STY4848 | 62     | STY4848 | 33.21 | STY0329 |
| ATGATTC+ | STY2909 | 100    |         |        | STY2909 | 98.9  |         |
| ATGGTTA+ | STY1127 | 100    | STY3361 | 63.81  | STY1127 | 98.4  | STY3361 |
| ATGCGTC- | STY2621 | 100    | STY3164 | 68     | STY2621 | 99.3  | STY3164 |
| ATGAAAC+ | STY2661 | 100    | STY3057 | 68.269 | STY2661 | 99.4  | STY3057 |
| ATGAAAT+ | STY2716 | 100    | STY0961 | 59     | STY2716 | 98.9  | STY0961 |
| ATGTCAA- | STY0948 | 100    | STY4025 | 85     | STY0948 | 99    | STY4025 |
| ATGACTG+ | STY0981 | 100    | STY4292 | 63.107 | STY0981 | 99.5  | STY4292 |
| ATGGCGC+ | STY1034 | 100    | STY2052 | 70     | STY1034 | 98    | STY2052 |
| ATGCGTC- | STY0953 | 100    | STY3748 | 61     | STY0953 | 98.9  | STY2110 |
| ATGCTGG- | STY2811 | 100    | STY3813 | 68     | STY2811 | 95.28 | STY3813 |
| GTGCATG+ | STY3847 | 100    | STY1831 | 86     | STY3847 | 98.7  | STY1831 |
| ATGGAAC+ | STY3758 | 100    | STY0503 | 62     | STY3758 | 99.1  | STY0503 |
| GTGATAC- | STY2989 | 100    | STY2714 | 54     | STY2989 | 98.9  | STY2714 |
| TTGCGCT+ | STY4687 | 100    | STY3823 | 67.925 | STY4687 | 91.89 | STY3823 |
| ATGCAA-  | STY2725 | 100    |         |        | STY2725 | 98.7  |         |
| GTGATTC- | STY2781 | 100    | STY3380 | 64.486 | STY2781 | 98.7  | STY3380 |
| ATGGATA- | STY2816 | 100    | STY2661 | 73     | STY2816 | 98.8  | STY2661 |
| ATGAGCT+ | STY3830 | 100    | STY2698 | 74     | STY3830 | 98.34 | STY3112 |
| ATGACTG+ | STY3784 | 100    | STY0723 | 60.784 | STY3784 | 99    | STY4138 |
| ATGAATC- | STY3751 | 100    | STY4545 | 62.745 | STY3751 | 97.92 | STY4545 |
| ATGAAAA+ | STY2513 | 100    | STY3498 | 82.178 | STY2513 | 99.3  | STY3498 |
| ATGAACA+ | STY4884 | 100    | STY2730 | 72.115 | STY4884 | 95.8  | STY2330 |
| ATGAAAA- | STY2131 | 100    |         |        | STY2131 | 99.7  |         |
| ATGACGT- | STY1788 | 100    |         |        | STY1788 | 99.4  |         |
| ATGTCCG+ | STY0402 | 100    |         |        | STY0402 | 97.5  |         |
| ATGAAAG+ | STY4433 | 100    | STY4180 | 57.407 | STY4433 | 99.04 | STY4180 |
| ATGACGA+ | STY2983 | 100    | STY2778 | 59.223 | STY2983 | 98.9  | STY2778 |
| ATGATTA+ | STY1677 | 100    | STY1252 | 60.396 | STY1677 | 99.1  | STY1252 |
| ATGGTAG+ | STY4754 | 100    | STY0438 | 78     | STY4754 | 96.77 | STY0438 |
|          | STY2317 | 59.223 | STY1170 | 59     | STY1170 | 12.96 | STY2317 |
| ATGTGCG+ | STY4787 | 100    |         |        | STY4787 | 98.9  |         |
| ATGATTA- | STY4761 | 100    | STY1961 | 63.366 | STY4761 | 98.7  | STY3765 |
|          | STY3053 | 65.385 |         |        | STY3053 | 17.8  |         |
| ATGAGCA- | STY4794 | 100    |         |        | STY4794 | 94.3  |         |
|          | STY3855 | 64     | STY0146 | 62.745 | STY0146 | 2.2   | STY2969 |
|          | STY4303 | 61.386 |         |        | STY4303 | 13.38 |         |
| GTGATGA- | STY1864 | 100    | STY3738 | 63.725 | STY1864 | 99    | STY0889 |
| ATGAGAT+ | STY1571 | 100    | STY2395 | 82     | STY1571 | 98.9  | STY2395 |
| ATGCACG- | STY3978 | 100    | STY4284 | 69.903 | STY3978 | 98.7  | STY4270 |
| ATGTCAA- | STY3951 | 100    | STY1728 | 88     | STY3951 | 98.4  | STY1728 |
| ATGGAGT+ | STY0392 | 100    | STY0786 | 68     | STY0392 | 98.9  | STY1919 |
| ATGTCCG+ | STY0087 | 100    | STY4473 | 70.588 | STY0087 | 97.8  | STY4473 |
| ATGGCCT+ | STY0174 | 100    | STY1521 | 64     | STY0174 | 99.6  | STY4103 |
| ATGCCGC+ | STY4434 | 100    | STY4434 | 54.369 | STY4434 | 99.4  | STY4434 |
| ATGATAA- | STY2560 | 100    | STY1578 | 63.725 | STY2560 | 99    | STY1578 |
| ATGTCTC- | STY1768 | 100    | STY0803 | 75.248 | STY1768 | 99.6  | STY0803 |
| ATGCTGG- | STY0898 | 100    | STY4126 | 62.037 | STY0898 | 99.7  | STY4126 |
| ATGAATA+ | STY1664 | 100    | STY4132 | 65.094 | STY1664 | 99.1  | STY0184 |

|          |         |        |          |        |         |       |          |
|----------|---------|--------|----------|--------|---------|-------|----------|
| ATGCCCG+ | STY1565 | 100    | STY0962  | 84     | STY1565 | 98.48 | STY0962  |
| GTGAAGA- | STY1562 | 100    | STY0707  | 93     | STY1562 | 97.27 | STY0707  |
| ATGACAA+ | STY3991 | 100    | STY1389  | 71     | STY3991 | 98.7  | STY1389  |
| ATGTCGG- | STY2820 | 100    | STY1489  | 62.136 | STY2820 | 99.5  | STY1489  |
| ATGCGCC+ | STY0442 | 100    | STY1513  | 66.337 | STY0442 | 98.1  | STY1513  |
| ATGGCAA+ | STY4409 | 100    | STY1352  | 63.462 | STY4409 | 98.9  | STY2720  |
| ATGTCCG- | STY2599 | 100    | STY4476  | 63     | STY2599 | 99.6  | STY2553  |
| ATGTTCC+ | STY0381 | 100    | STY1240  | 59.223 | STY0381 | 81.5  | STY1240  |
| ATGGTTA- | STY2772 | 100    | STY1958  | 67     | STY2772 | 98    | STY1958  |
| GTGCGAT+ | STY0503 | 100    | STY0985  | 64     | STY0503 | 98.2  | STY0985  |
| ATGGATA+ | STY0614 | 100    | STY3936  | 62.136 | STY0614 | 98.6  | STY3936  |
| ATGTTGA- | STY1782 | 99     | STY4879  | 60.377 | STY1782 | 96.5  | STY4879  |
| ATGAGTT- | STY4767 | 100    | STY2258  | 57     | STY4767 | 98.6  | STY2258  |
| ATGGCAA- | STY4815 | 100    | STY4184  | 63.107 | STY4815 | 99    | STY4184  |
| ATGAACG- | STY2841 | 100    | STY4920  | 69     | STY2841 | 99.1  | STY4920  |
| ATGGATG+ | STY3378 | 100    | STY1897  | 61.468 | STY3378 | 99.1  | STY1897  |
| ATGAAGG- | STY3423 | 100    | STY0973  | 87     | STY3423 | 99    | STY0973  |
| ATGGAGC+ | STY3457 | 100    | STY1604  | 58.824 | STY3457 | 98.8  | STY1604  |
| ATGGCTG+ | STY3770 | 100    | STY2777  | 53.846 | STY3770 | 99.4  | STY2777  |
|          | STY1742 | 100    | STY0894  | 52.427 | STY1742 | 46.41 | STY0894  |
| ATGACAG- | STY0514 | 100    | HCM2.004 | 56.311 | STY0514 | 99.6  | HCM2.004 |
| ATGCAAC+ | STY2911 | 100    | STY4876  | 70.874 | STY2911 | 98.8  | STY4876  |
|          | STY2268 | 64.706 | STY1226  | 60.577 | STY1226 | 6.13  | STY2268  |
| ATGCAGA- | STY2832 | 100    |          |        | STY2832 | 99.5  |          |
|          | STY3370 | 100    | STY3771  | 68     | STY3370 | 98.3  | STY3771  |
| ATGAGCG+ | STY4181 | 100    | STY2691  | 60.396 | STY4181 | 99.1  | STY0637  |
| ATGAGTA+ | STY3452 | 100    | STY2950  | 58.654 | STY3452 | 99.6  | STY2950  |
| ATGTCTT- | STY1701 | 100    | STY2187  | 71     | STY1701 | 98.9  | STY2187  |
| GTGACCC+ | STY2740 | 100    | STY2182  | 65.094 | STY2740 | 98.7  | STY0004  |
| ATGGCTA+ | STY1160 | 100    |          |        | STY1160 | 99.1  |          |
| ATGAAAT+ | STY2933 | 100    | STY2507  | 56.19  | STY2933 | 99.2  | STY2507  |
| ATGAAAC- | STY0292 | 100    | STY4241  | 60.55  | STY0292 | 98.9  | STY4241  |
| ATGGTTA- | STY3005 | 100    | STY3005  | 53     | STY3005 | 98.4  | STY3005  |
| ATGAGGC+ | STY4295 | 100    | STY2343  | 66.019 | STY4295 | 99    | STY3813  |
| ATGCCTT- | STY1357 | 100    | STY4170  | 67     | STY1357 | 99.1  | STY4170  |
| ATGACTT+ | STY3826 | 100    | STY4111  | 74     | STY3826 | 98.9  | STY4111  |
| ATGCGCA- | STY0598 | 100    | STY2158  | 61.165 | STY0598 | 98.1  | STY2158  |
| ATGCCGA- | STY1264 | 100    | STY1462  | 61.165 | STY1264 | 96.5  | STY1462  |
| ATGACTG- | STY1201 | 100    | STY1201  | 61.165 | STY1201 | 98    | STY1201  |
| ATGAGCC+ | STY4326 | 100    | STY1370  | 63.366 | STY4326 | 98.7  | STY1370  |
| GTGACTG+ | STY3838 | 100    | STY3153  | 64.151 | STY3838 | 93.08 | STY0026  |
| ATGAAAC- | STY0691 | 100    | STY2118  | 77     | STY0691 | 98.7  | STY2118  |
| ATGAAAG- | STY0277 | 100    | STY2660  | 66     | STY0277 | 96.7  | STY3037  |
|          | STY1665 | 100    | STY3132  | 63.107 | STY1665 | 87.73 | STY0793  |
| ATGTTAA- | STY3007 | 100    |          |        | STY3007 | 99.6  |          |
| ATGACTC- | STY1210 | 100    |          |        | STY1210 | 99.3  |          |
| ATGGATA- | STY4450 | 100    | STY0553  | 70     | STY4450 | 99.1  | STY0634  |
| ATGACGA+ | STY2874 | 100    | STY4089  | 58.095 | STY2874 | 91.29 | STY4089  |
| ATGAAAA+ | STY0042 | 100    | STY4850  | 60.952 | STY0042 | 99.7  | STY4850  |
| ATGAGTA+ | STY3740 | 100    | STY2724  | 62.963 | STY3740 | 99.6  | STY2724  |
| ATGGCAA+ | STY4108 | 98     | STY4295  | 57     | STY4108 | 96.7  | STY4295  |
| ATGGCTA+ | STY3913 | 100    | STY2180  | 69     | STY3913 | 98.8  | STY2180  |

|           |         |        |          |        |         |       |         |
|-----------|---------|--------|----------|--------|---------|-------|---------|
| ATGAAA +  | STY0429 | 100    | STY0669  | 64.078 | STY0429 | 97.43 | STY0669 |
| ATGGATG - | STY3012 | 100    | STY2188  | 63     | STY3012 | 100   | STY1700 |
| ATGAATC - | STY2270 | 100    | STY1736  | 68     | STY2270 | 96.31 | STY4477 |
| ATGAGTA - | STY2126 | 100    | STY1733  | 67     | STY2126 | 99.2  | STY1733 |
| GTGAAAT + | STY1342 | 100    | HCM2.000 | 63     | STY1342 | 100   | STY4214 |
| ATGAAAG + | STY1729 | 100    | STY3285  | 72.277 | STY1729 | 98.6  | STY3285 |
| ATGAGAG + | STY4072 | 100    |          |        | STY4072 | 98.2  |         |
| ATGAAA +  | STY0382 | 100    | STY4879  | 60     | STY0382 | 99.1  | STY4879 |
| ATGAATG + | STY3723 | 99     | STY0884  | 67     | STY3723 | 88.4  | STY0884 |
| ATGCATT - | STY3574 | 100    | STY0890  | 60.185 | STY3574 | 99.1  | STY0890 |
| GTGGCAA - | STY2767 | 100    |          |        | STY2767 | 99    |         |
| GTGCAGC - | STY3631 | 100    | STY0385  | 61.321 | STY3631 | 99.3  | STY0385 |
| ATGGCGC - | STY3652 | 100    | STY3427  | 66     | STY3652 | 98.9  | STY3427 |
| ATGATTG + | STY1290 | 100    | STY1486  | 78     | STY1290 | 98.3  | STY1486 |
| ATGAGCA + | STY1918 | 100    | STY1530  | 65.686 | STY1918 | 99.3  | STY1530 |
| ATGAAGC - | STY1316 | 100    | STY0487  | 63.107 | STY1316 | 99.3  | STY0167 |
| ATGCCGC - | STY0167 | 100    | STY0119  | 63.208 | STY0167 | 99.2  | STY3468 |
| ATGCTAA - | STY0465 | 100    | STY2875  | 60.748 | STY0465 | 97.96 | STY2875 |
| ATGAAAC + | STY3842 | 100    |          |        | STY3842 | 99.2  |         |
| ATGGCAT - | STY1725 | 100    | STY1220  | 93     | STY1725 | 99.4  | STY1220 |
| ATGAAA +  | STY0594 | 99     | STY1055  | 63.889 | STY0594 | 97.4  | STY0029 |
| ATGAAGC - | STY3611 | 100    | STY3152  | 53.846 | STY3611 | 98.7  | STY3152 |
| ATGGCTA - | STY3648 | 100    | STY2701  | 71     | STY3648 | 97    | STY2701 |
| ATGACAC + | STY0209 | 100    | STY2834  | 57     | STY0209 | 98.39 | STY0004 |
| ATGGAGA + | STY1960 | 100    | STY0156  | 60.952 | STY1960 | 99.6  | STY0156 |
| ATGGGAT + | STY1910 | 100    | STY0492  | 64.706 | STY1910 | 98.7  | STY0804 |
| GTGCTGC - | STY3019 | 100    | STY2122  | 77     | STY3019 | 99.3  | STY1706 |
| ATGGACC - | STY0517 | 100    | STY1816  | 62     | STY0517 | 99.7  | STY3268 |
| ATGCAA +  | STY1523 | 100    | STY1913  | 87     | STY1523 | 98.6  | STY1913 |
| ATGAATC + | STY1544 | 100    | STY0101  | 62.857 | STY1544 | 99.2  | STY0101 |
| ATGGGAA + | STY0964 | 100    | STY1568  | 88     | STY0964 | 99.7  | STY1568 |
| ATGAGTA + | STY0659 | 100    | STY0962  | 77     | STY0659 | 97.3  | STY1288 |
| ATGACAA + | STY1515 | 100    | STY0398  | 60.952 | STY1515 | 38.15 | STY0398 |
|           | STY3841 | 83     | STY2270  | 63.366 | STY3841 | 71.87 | STY0963 |
| ATGCCAA - | STY1462 | 100    | STY1264  | 63.81  | STY1462 | 97.47 | STY1264 |
|           | STY3394 | 84     | STY4892  | 84     | STY2128 | 39.09 | STY4892 |
| ATGAAGA - | STY1421 | 100    | STY3917  | 88     | STY1421 | 98.1  | STY3116 |
| ATGCGCT + | STY1354 | 100    | STY2870  | 62.745 | STY1354 | 98    | STY2870 |
| ATGATAG + | STY0554 | 100    | STY4170  | 82     | STY0554 | 99.1  | STY4170 |
| ATGATTG + | STY0559 | 100    | STY0274  | 71     | STY0559 | 99.1  | STY0274 |
| ATGGTTA - | STY0584 | 100    | STY4324  | 71     | STY0584 | 99.8  | STY4324 |
| ATGTCAC + | STY0639 | 100    | STY2541  | 64     | STY0639 | 98.4  | STY2541 |
| ATGAATG - | STY4615 | 100    | STY3687  | 89     | STY4615 | 97.6  | STY3687 |
| ATGCGTG + | STY1284 | 100    | STY2762  | 65.094 | STY1284 | 99.3  | STY2762 |
| ATGGAGA + | STY1935 | 100    | STY4774  | 62.136 | STY1935 | 98.9  | STY1445 |
|           | STY3668 | 100    | STY4635  | 100    | STY3668 | 83.69 | STY4635 |
| ATGATGG + | STY3156 | 100    | STY3155  | 80     | STY3156 | 90.44 | STY2425 |
| ATGACAA + | STY4113 | 100    |          |        | STY4113 | 98.6  |         |
| ATGAGTT + | STY4041 | 100    | STY4041  | 50     | STY4041 | 99.1  | STY4041 |
| ATGAGCC - | STY3342 | 100    | STY1738  | 81     | STY3342 | 98.4  | STY2404 |
| ATGTCCG + | STY3148 | 100    | STY1226  | 58.879 | STY3148 | 99.3  | STY1226 |
|           | STY4415 | 61.765 | STY0508  | 59     | STY4415 | 11.16 | STY0508 |

|           |          |        |          |        |          |       |          |
|-----------|----------|--------|----------|--------|----------|-------|----------|
| ATGGCTA + | STY3308  | 100    | STY0711  | 57.547 | STY3308  | 98.7  | STY0711  |
| ATGGCTG + | STY2936  | 100    | STY2392  | 61.765 | STY2936  | 98.8  | STY2392  |
| ATGTTCT(+ | STY2923  | 100    | STY4283  | 60     | STY2923  | 98.9  | STY4283  |
| ATGCAGC + | STY3562  | 100    |          |        | STY3562  | 98.5  |          |
|           | HCM1.57c | 59.223 | STY1257  | 59     | HCM1.57c | 18.31 | STY1257  |
| ATGGCCC - | STY3211  | 100    | STY2797  | 64.356 | STY3211  | 99.1  | STY2797  |
|           | STY3242  | 100    | STY2449  | 66     | STY3242  | 64    | STY3437  |
| ATGTCAG + | STY3293  | 100    | STY2472  | 65.385 | STY3293  | 97.7  | STY1285  |
| GTGACAA - | STY0511  | 100    | STY4462  | 70     | STY0511  | 98.8  | STY4462  |
| ATGCAAG - | STY4194  | 100    | STY4489  | 85     | STY4194  | 98.9  | STY4489  |
|           | STY0829  | 60.784 | STY4095  | 50     | STY0829  | 24.62 | STY4095  |
| ATGCTGT + | STY4743  | 100    | STY4120  | 76.238 | STY4743  | 98    | STY4120  |
| ATGAATA + | STY4813  | 100    | STY2352  | 63.366 | STY4813  | 99.3  | STY2352  |
| ATGTTGA + | STY4937  | 100    |          |        | STY4937  | 98.3  |          |
| ATGAGTC + | STY2963  | 100    | STY1549  | 66.355 | STY2963  | 98.3  | STY0612  |
| ATGGCGA + | STY2410  | 100    | STY1337  | 69     | STY2410  | 99.79 | STY1337  |
| ATGAACG - | STY2292  | 100    | STY2496  | 56.436 | STY2292  | 98    | STY2496  |
| ATGTATT - | STY2924  | 100    |          |        | STY2924  | 99.1  |          |
| ATGCCAT - | STY2427  | 100    |          |        | STY2427  | 99.6  |          |
| ATGACAA - | STY2315  | 100    |          |        | STY2315  | 98.6  |          |
| ATGAAGC - | STY2406  | 100    | STY3523  | 62     | STY2406  | 99.4  | STY1344  |
| GTGAAAT - | STY1927  | 100    | STY3267  | 62     | STY1927  | 99    | STY3267  |
| ATGAGCA - | STY4122  | 100    | STY0190  | 62.376 | STY4122  | 97.2  | STY0286  |
|           | STY2271  | 60.396 | STY3731  | 60     | STY3731  | 8.18  | STY2271  |
| ATGGCAA - | STY1972  | 100    | STY2522  | 69     | STY1972  | 99.6  | STY2522  |
| ATGTACA - | STY4106  | 100    | STY4824  | 64.762 | STY4106  | 96.5  | STY4824  |
| ATGCAGA + | STY4357  | 100    | STY4727  | 61.321 | STY4357  | 99.7  | STY4727  |
| ATGAATG + | STY4717  | 100    | STY3644  | 60.194 | STY4717  | 99.6  | STY3644  |
| ATGATTA(- | STY3422  | 100    | STY1956  | 87     | STY3422  | 98.4  | STY3110  |
| ATGAAGT - | STY3480  | 100    | STY2986  | 64.423 | STY3480  | 99.1  | HCM2.007 |
| ATGTCTT(- | STY3395  | 100    | STY2128  | 83     | STY3395  | 98.6  | STY4892  |
| ATGAGCA - | STY3310  | 100    | STY3366  | 60     | STY3310  | 98.9  | STY3366  |
| GTGATAT(- | STY3222  | 100    | STY4194  | 61.386 | STY3222  | 99.1  | STY3826  |
| ATGGATC + | STY1217  | 100    | STY1215  | 65.385 | STY1217  | 98.7  | STY1218  |
| ATGAGTG + | STY3386  | 100    | STY2803  | 64.356 | STY3386  | 99    | STY3121  |
| GTGAGAC - | STY1735  | 100    | STY2634  | 72     | STY1735  | 98.8  | STY2634  |
|           | STY4037  | 86     | STY0429  | 53     | STY4037  | 16.91 | STY0429  |
| ATGGATT + | STY3372  | 100    | STY3372  | 64.151 | STY3372  | 99.6  | STY4498  |
| ATGCAAA + | STY3256  | 100    |          |        | STY3256  | 98.7  |          |
| ATGAGAA + | STY3207  | 100    |          |        | STY3207  | 99    |          |
| ATGAAAA - | STY0800  | 99     | STY2807  | 52     | STY0800  | 98.4  | STY2807  |
| ATGGAAC + | STY3307  | 100    | STY1553  | 79     | STY3307  | 99.7  | STY1553  |
| ATGGCGC + | STY3230  | 100    | STY3795  | 64.078 | STY3230  | 98.6  | STY2394  |
| ATGCTCG + | STY1139  | 100    | STY2960  | 64.078 | STY1139  | 99.4  | STY3432  |
| ATGGCTT - | STY0810  | 100    | HCM2.010 | 68.932 | STY0810  | 99    | STY1911  |
| ATGAAAA - | STY0853  | 100    | STY4199  | 68.317 | STY0853  | 99    | STY2878  |
| ATGACGC + | STY0896  | 100    | STY0688  | 80     | STY0896  | 98.7  | STY0688  |
| ATGCTGG - | STY0510  | 100    | STY2807  | 65.421 | STY0510  | 99.5  | STY2807  |
| ATGCTAC + | STY0424  | 100    |          |        | STY0424  | 98.6  |          |
| ATGATTT(- | STY3296  | 100    |          |        | STY3296  | 70.13 |          |
|           | STY0609a | 96     | STY0433  | 62     | STY0609a | 51.49 | STY0433  |
|           | STY0610  | 85     | STY3350  | 59.259 | STY0610  | 47.22 | STY3350  |

|           |          |        |          |        |          |       |          |
|-----------|----------|--------|----------|--------|----------|-------|----------|
| ATGTCGA - | STY2787  | 100    | STY1754  | 71     | STY2787  | 99.4  | STY0226  |
| ATGATGA - | STY2191  | 100    | STY4473  | 91     | STY2191  | 100   | STY4473  |
|           | STY1077  | 72     | STY1883  | 65     | STY1883  | 46.04 | STY1077  |
| ATGATCA + | STY2415  | 100    |          |        | STY2415  | 99.2  |          |
| ATGGCAT - | STY0862  | 100    | STY3131  | 62.136 | STY0862  | 98.9  | STY3131  |
| ATGACTT + | STY4789  | 100    |          |        | STY4789  | 100   |          |
| ATGGCCG - | STY4880  | 100    | STY2940  | 59.615 | STY4880  | 97.9  | STY2940  |
| ATGATTT + | STY3048  | 100    | STY0063  | 62.264 | STY3048  | 99.2  | STY3130  |
| ATGGAAT - | STY1754  | 100    | STY2787  | 70     | STY1754  | 99.2  | STY2787  |
| ATGAAAC - | STY1158  | 100    | STY2478  | 66.981 | STY1158  | 98    | STY2478  |
| ATGAATC + | STY1745  | 100    | STY1746  | 93     | STY1745  | 100   | STY1746  |
| ATGCTAT + | STY4150  | 100    |          |        | STY4150  | 99    |          |
| ATGCAAG + | STY4092  | 100    |          |        | STY4092  | 99.8  |          |
| ATGTATT + | STY0045  | 100    | STY1924  | 64.423 | STY0045  | 77.61 | STY1958  |
| ATGGATA - | STY0081  | 100    | STY0632  | 60.194 | STY0081  | 97.3  | STY4473  |
| ATGAATA + | STY0046  | 100    | STY0039  | 81     | STY0046  | 98.6  | STY0039  |
| ATGATCA + | STY0102  | 100    | STY0111  | 63.551 | STY0102  | 99.4  | STY3061  |
| ATGAGCA - | STY0106  | 100    | STY0185  | 64     | STY0106  | 99.4  | STY0185  |
| ATGCAAA + | STY0091  | 100    | STY3123  | 71     | STY0091  | 100   | STY3123  |
|           | STY0111  | 63     | STY2071  | 58.824 | STY2071  | 51.57 | STY2279  |
| ATGTATC + | STY1439  | 99     | HCM1.158 | 51.485 | STY1439  | 96.5  | HCM1.158 |
| ATGAGCC + | STY1372  | 100    |          |        | STY1372  | 99.1  |          |
| ATGCAAA + | STY1391  | 100    | STY1480  | 70     | STY1391  | 92.2  | STY1480  |
|           | STY3168  | 66.337 |          |        | STY3168  | 45.49 |          |
| ATGGCGT + | STY3375  | 100    | STY0504  | 64.078 | STY3375  | 99.2  | STY2973  |
|           | STY2316  | 63.208 |          |        | STY2316  | 15.46 |          |
|           | STY2297  | 61.386 | STY4082  | 56.863 | STY2297  | 9.67  | STY4082  |
|           | STY1907  | 44     | STY2695  | 44     | STY2695  | 10.12 | STY1907  |
|           | STY1654  | 62.617 | HCM1.263 | 61     | HCM1.263 | 6.06  | STY1654  |
|           | STY3306  | 52.475 |          |        | STY3306  | 12.4  |          |
|           | HCM1.252 | 72.277 | STY2206  | 65     | HCM1.252 | 49.79 | STY4598  |
|           | STY3732  | 63.462 | HCM2.012 | 62.376 | HCM2.012 | 8.72  | STY3732  |
|           | STY3433  | 39     |          |        | STY3433  | 7.65  |          |
|           | HCM1.86  | 62.5   | STY0360  | 59.048 | STY0360  | 24.04 | HCM1.86  |
|           | STY4846  | 100    | STY4260  | 62.745 | STY4846  | 93.47 | STY0820  |
|           | STY1011  | 74     | STY4776  | 60.194 | STY1011  | 61.52 | STY4776  |
|           | STY2167  | 96     | STY0583  | 45     | STY2167  | 62.93 | STY0583  |
|           | STY1750  | 61.261 | STY0294  | 61     | STY1750  | 26.68 | STY0294  |
|           | STY2762  | 52.427 | STY2372  | 51.485 | STY2762  | 40.61 | STY2372  |
|           | STY0308  | 53.465 |          |        | STY0308  | 39.14 |          |
| ATGAATC + | STY3268  | 100    | STY2657  | 73     | STY3268  | 99.2  | STY2657  |
| ATGGGTA + | STY0311  | 100    | STY0313  | 77     | STY0311  | 100   | STY0313  |
| ATGGTTA + | STY0350  | 100    | STY2275  | 59.804 | STY0350  | 100   | STY2275  |
| ATGAACG - | STY1018  | 100    | STY2131  | 63.208 | STY1018  | 100   | STY2131  |
| GTGGTAT + | STY1045  | 100    | STY3208  | 60.377 | STY1045  | 100   | STY3208  |
| ATGAACG + | STY1061  | 100    | STY2026  | 95     | STY1061  | 100   | STY2026  |
| ATGACTG - | STY2036  | 100    | STY1051  | 96     | STY2036  | 100   | STY1051  |
| GTGAAAA + | STY0476  | 100    | STY0477  | 88     | STY0476  | 100   | STY0477  |
| ATGAACT - | STY1020  | 100    | STY2066  | 61.165 | STY1020  | 100   | STY2066  |
| ATGACTT + | STY1047  | 100    | STY2040  | 98     | STY1047  | 100   | STY2040  |

|           |         |     |         |        |         |     |         |
|-----------|---------|-----|---------|--------|---------|-----|---------|
| ATGACAA + | STY1063 | 100 | STY2024 | 68     | STY1063 | 100 | STY2024 |
| ATGGCAC - | STY1048 | 100 | STY1049 | 100    | STY2039 | 100 | STY1048 |
| ATGTTAA(+ | STY2055 | 100 | STY2805 | 51.923 | STY2055 | 100 | STY2055 |
| ATGGCAG + | STY1625 | 100 | STY4607 | 67     | STY1625 | 100 | STY4607 |
| ATGAAGA - | STY1672 | 100 | STY2672 | 60.396 | STY1672 | 100 | STY2672 |
| ATGGCCC - | STY1070 | 100 | STY2016 | 100    | STY2016 | 100 | STY1070 |
| ATGAGTT - | STY2032 | 100 | STY1055 | 90     | STY2032 | 100 | STY1055 |
| GTGCACA + | STY2057 | 100 |         |        | STY2057 | 100 |         |
| ATGAGCA + | STY2073 | 100 | STY2562 | 66.346 | STY2073 | 100 | STY2562 |
| ATGAAAA(+ | STY1760 | 100 | STY4383 | 75.728 | STY1760 | 100 | STY4383 |
| ATGTCGG + | STY1067 | 100 | STY2020 | 74     | STY1067 | 100 | STY2020 |
| ATGAAGC - | STY2043 | 100 | STY4636 | 91     | STY2043 | 100 | STY4636 |
| TTGACTA - | STY2059 | 100 |         |        | STY2059 | 100 |         |
| ATGAATT - | STY3660 | 100 | STY4644 | 69     | STY3660 | 100 | STY4644 |
| ATGACAG + | STY3676 | 100 | STY4626 | 94     | STY3676 | 100 | STY4626 |
| ATGAATA - | STY4654 | 100 | STY4460 | 62.5   | STY4654 | 100 | STY4460 |
| ATGAATT(- | STY4671 | 100 | STY4787 | 58.416 | STY4671 | 100 | STY4787 |
| ATGTTTA(- | STY4824 | 100 | STY4106 | 64.423 | STY4824 | 100 | STY4106 |
| GTGACGC + | STY4849 | 100 | STY2510 | 87     | STY4849 | 100 | STY0729 |
|           | STY4144 | 100 | STY1288 | 69     | STY4144 | 100 | STY1288 |
| GTGGTAC + | STY4525 | 100 | STY0979 | 67.961 | STY4525 | 100 | STY0979 |

|           |         |        |         |        |         |       |         |
|-----------|---------|--------|---------|--------|---------|-------|---------|
| ATGGATA + | STY1267 | 100    | STY0257 | 70.093 | STY1267 | 98.5  | STY0257 |
| ATGGCTG + | STY0146 | 100    | STY4796 | 73     | STY0146 | 98.7  | STY4796 |
|           | STY2359 | 64.356 | STY2241 | 60     | STY2501 | 12.7  | STY2241 |
| ATGAGCA - | STY0200 | 100    | STY0077 | 75.248 | STY0200 | 93.15 | STY0077 |
| ATGGGAT + | STY0257 | 100    |         |        | STY0257 | 99.3  |         |
| ATGGCAC - | STY1548 | 100    | STY1323 | 84     | STY1548 | 98.9  | STY1323 |
| GTGAGCA + | STY0221 | 100    | STY4480 | 69.903 | STY0221 | 97.8  | STY0635 |
| ATGTTTT(- | STY0705 | 100    |         |        | STY0705 | 28.59 |         |
| ATGAAAT - | STY0734 | 100    | STY2660 | 70     | STY0734 | 99.5  | STY2660 |
|           | STY4097 | 73     | STY3100 | 65     | STY4097 | 45.97 | STY3100 |

|           |         |        |         |        |         |       |         |
|-----------|---------|--------|---------|--------|---------|-------|---------|
| ATGGCTC + | STY3899 | 100    | STY1948 | 62.136 | STY3899 | 98.5  | STY0547 |
|           | STY2540 | 61.468 | STY1131 | 41     | STY2540 | 38.19 | STY3939 |
| ATGGCAA - | STY3923 | 100    | STY0127 | 76     | STY3923 | 98.64 | STY0127 |
| ATGGGAT + | STY0014 | 100    | STY3584 | 64.078 | STY0014 | 98.4  | STY0036 |
| ATGTTAA(+ | STY2637 | 100    | STY3995 | 66.667 | STY2637 | 98.82 | STY3994 |
| ATGACCC - | STY0808 | 100    | STY4790 | 67.647 | STY0808 | 99.1  | STY4790 |
| ATGAAAA + | STY0157 | 100    | STY1813 | 75.248 | STY0157 | 98.7  | STY1813 |
|           | STY2895 | 56     |         |        | STY2895 | 16.83 |         |
| ATGGATC - | STY1112 | 100    | STY0145 | 57.407 | STY1112 | 99.4  | STY0145 |
| GTGAATA + | STY4395 | 100    | STY4405 | 81     | STY4395 | 98.8  | STY1919 |
| ATGTCTC + | STY4340 | 100    | STY1289 | 65.686 | STY4340 | 99.6  | STY0100 |
| ATGCTAC - | STY4300 | 100    |         |        | STY4300 | 99.6  |         |
| ATGAAAT - | STY1869 | 100    |         |        | STY1869 | 98.9  |         |
| ATGAAAC + | STY4348 | 99     | STY3945 | 49.038 | STY4348 | 97.5  | STY3945 |

|           |          |        |          |        |          |       |          |
|-----------|----------|--------|----------|--------|----------|-------|----------|
| ATGGCAG + | STY4309  | 100    | STY0240  | 60.377 | STY4309  | 100   | STY0240  |
| GTGATTG - | STY1273  | 100    | STY0064  | 61     | STY1273  | 99.4  | STY0064  |
| ATGAAAT - | STY1843  | 100    | STY1252  | 61.765 | STY1843  | 99.6  | STY1252  |
| ATGACAA - | STY2316  | 100    | STY3472  | 58     | STY2316  | 97.7  | STY3472  |
| GTGGAAT + | STY2346  | 100    | STY0962  | 63.303 | STY2346  | 96.76 | STY0962  |
| ATGACGC + | STY4273  | 100    | STY1505  | 76     | STY4273  | 97.44 | STY1505  |
| ATGAGTA + | STY4237  | 100    | STY2161  | 60     | STY4237  | 98.7  | STY2161  |
| ATGGAAC + | STY2348  | 100    |          |        | STY2348  | 98.7  |          |
|           | STY4838  | 60.784 |          |        | STY4838  | 5.86  |          |
| ATGGCTC - | STY0328  | 100    | STY0323  | 84     | STY0328  | 92    | STY0323  |
|           | STY1579  | 65.049 |          |        | STY1579  | 45.41 |          |
| ATGTTTA(- | STY2337  | 100    | STY2383  | 59.633 | STY2337  | 99.4  | STY2383  |
|           | STY4618  | 99     | STY3684  | 94     | STY4618  | 91.6  | STY3684  |
|           | STY1924  | 65.741 |          |        | STY1924  | 22.75 |          |
|           | STY0129  | 64.078 | STY2189  | 42     | STY0129  | 29.21 | STY2189  |
| ATGGAAC + | STY1085  | 100    | STY2983  | 62.037 | STY1085  | 98.9  | STY2983  |
| ATGAACC + | STY1647  | 100    | STY4294  | 68.269 | STY1647  | 99.3  | STY4294  |
| ATGGAGC + | STY0917  | 100    | STY4739  | 64.423 | STY0917  | 98.6  | STY4739  |
|           | STY3760  | 60     |          |        | STY3760  | 12    |          |
| ATGCATG - | STY2773  | 100    | STY4508  | 61.386 | STY2773  | 97.9  | STY1568  |
| ATGATAA(- | STY2809  | 100    | STY0703  | 76     | STY2809  | 99.4  | STY2981  |
|           | HCM2.004 | 65.347 | STY1813  | 63.208 | HCM2.004 | 3.79  | STY1813  |
| ATGAGTA + | STY0968  | 100    | STY4916  | 63.107 | STY0968  | 95.76 | STY0883  |
| ATGTTGC + | STY0997  | 100    | STY3644  | 68.932 | STY0997  | 98.3  | STY3644  |
| ATGAATC - | STY3810  | 100    | STY1930  | 64.151 | STY3810  | 98.7  | STY1930  |
| ATGATGA + | STY4420  | 100    | STY0619  | 61.386 | STY4420  | 98    | STY0619  |
| TTGATAG - | STY3034  | 99     | STY1297  | 61.111 | STY3034  | 75.3  | STY2198  |
| ATGGCTG - | STY4702  | 100    | STY0778  | 71.287 | STY4702  | 99.3  | STY0778  |
|           | STY4610  | 72     | STY3692  | 61.386 | STY1639  | 33.68 | STY3692  |
| GTGAAAG - | STY0974  | 100    | STY2432  | 61     | STY0974  | 99.7  | STY4320  |
| ATGAAAA(- | STY1011  | 100    | STY4552  | 62     | STY1011  | 99.8  | STY4281  |
| GTGAGCA + | STY4405  | 100    | STY3564  | 64     | STY4405  | 97.6  | STY2884  |
|           | STY3223  | 78     | STY4707  | 62.745 | STY3223  | 61.32 | STY0522  |
| ATGGAAA - | STY4449  | 99     | STY2137  | 62.376 | STY4449  | 97.8  | STY2137  |
| ATGGAAA - | STY4805  | 100    |          |        | STY4805  | 99    |          |
| ATGCCTG - | STY2564  | 100    | HCM1.158 | 71.845 | STY2564  | 99.3  | HCM1.158 |
| ATGGCAT + | STY2591  | 100    | STY2809  | 68.627 | STY2591  | 98.9  | STY3711  |
| GTGCGG1+  | STY1248  | 100    |          |        | STY1248  | 99    |          |
|           | STY1578  | 65.385 | STY2655  | 61.386 | STY1578  | 28.54 | STY3122  |
| GTGAAGC - | STY1203  | 100    |          |        | STY1203  | 99.1  |          |
| ATGAAAG + | STY3726  | 100    | STY3764  | 70.37  | STY3726  | 95.1  | STY3764  |
| ATGAATT + | STY1791  | 100    | STY1755  | 72     | STY1791  | 99.2  | STY1755  |
| ATGATGG + | STY4713  | 100    | STY2478  | 64.151 | STY4713  | 98.8  | STY2478  |
|           | STY4292  | 60.577 | STY1956  | 58.252 | STY4292  | 17.88 | STY1956  |
| ATGGTTG - | STY2487  | 100    |          |        | STY2487  | 97.6  |          |
| ATGGAGA - | STY2521  | 100    | STY3945  | 66.337 | STY2521  | 99.6  | STY3945  |
|           | STY1292  | 64.151 | STY3519  | 60.577 | STY1292  | 4.7   | STY3519  |
| ATGGAAC - | STY2489  | 100    | STY1752  | 62.376 | STY2489  | 99    | STY2159  |
| ATGTTTT(- | STY2524  | 100    | STY3331  | 63.462 | STY2524  | 98.9  | STY3331  |
| ATGTCCC + | STY2561  | 100    |          |        | STY2561  | 99.4  |          |
| ATGTCTG - | STY2600  | 100    |          |        | STY2600  | 99.4  |          |



|            |         |      |          |        |         |       |         |
|------------|---------|------|----------|--------|---------|-------|---------|
| ATGAGTA -  | STY1800 | 100  | STY2773  | 59.406 | STY1800 | 99.3  | STY2773 |
| ATGCGTT -  | STY1706 | 100  | STY3019  | 75     | STY1706 | 98.6  | STY3019 |
| ATGGAAA +  | STY3902 | 100  |          |        | STY3902 | 99.1  |         |
| ATGTGGA +  | STY0337 | 100  | STY1390  | 61.321 | STY0337 | 99.6  | STY1390 |
| ATGATCG +  | STY0253 | 100  |          |        | STY0253 | 99.8  |         |
| ATGGAGT +  | STY4430 | 100  | STY4482  | 56.863 | STY4430 | 99.4  | STY4482 |
| ATGACTA -  | STY2620 | 100  | STY3577  | 66.337 | STY2620 | 99    | STY3577 |
| ATGTCGC +  | STY0151 | 100  | STY4012  | 66     | STY0151 | 99.8  | STY1738 |
| ATGCGGC -  | STY1810 | 100  | STY1140  | 64.762 | STY1810 | 98.2  | STY1140 |
|            | STY0086 | 78   | STY0240  | 63.366 | STY0086 | 59.2  | STY0240 |
| ATGGCTG -  | STY1749 | 99   | STY3957  | 64.151 | STY1749 | 98.3  | STY3125 |
| ATGTTTC +  | STY1491 | 100  | STY2941  | 65.347 | STY1491 | 98.2  | STY2458 |
| ATGCGTA -  | STY1703 | 100  | STY2390  | 61.165 | STY1703 | 99.2  | STY2390 |
| ATGGAAA +  | STY0438 | 100  | STY4754  | 77     | STY0438 | 99.1  | STY3625 |
| ATGGAAA -  | STY2481 | 100  | STY3955  | 68     | STY2481 | 98.5  | STY3955 |
| ATGAACT +  | STY2818 | 100  | STY3430  | 63.366 | STY2818 | 99.1  | STY3430 |
| ATGAAAA -  | STY2279 | 100  | STY4925  | 60     | STY2279 | 99.3  | STY4925 |
| ATGCAAG +  | STY0122 | 100  | STY2598  | 63.462 | STY0122 | 99.2  | STY2973 |
| ATGGAAA -  | STY0166 | 100  | STY3138  | 61.386 | STY0166 | 99.3  | STY3881 |
| ATGAGCC -  | STY2499 | 100  | STY3351  | 80     | STY2499 | 98.1  | STY3351 |
| ATGGCCC -  | STY2681 | 100  | STY3808  | 74     | STY2681 | 98.1  | STY3808 |
| ATGCAGT -  | STY0867 | 100  | STY0215  | 62.617 | STY0867 | 99.2  | STY2160 |
| ATGCGTC -  | STY2218 | 100  | STY0878  | 79     | STY2218 | 98.8  | STY0878 |
| ATGTCAT -  | STY0636 | 100  | STY0802  | 67     | STY0636 | 98.5  | STY0635 |
|            | STY2711 | 36   |          |        | STY2711 | 6.22  |         |
|            | STY3005 | 62.5 | STY1317  | 50     | STY3005 | 19.21 | STY1317 |
| ATGAAAA +  | STY4044 | 100  | STY0171  | 63.551 | STY4044 | 98.4  | STY3215 |
| ATGAGTA +  | STY4168 | 100  | STY3983  | 64.356 | STY4168 | 98.7  | STY1369 |
| ATGATAT +  | STY4254 | 100  | STY3352  | 62.617 | STY4254 | 99.5  | STY4804 |
| ATGATAA +  | STY0950 | 100  | STY4306  | 62.857 | STY0950 | 98.6  | STY4196 |
| ATGGTAC -  | STY2764 | 100  | STY1015  | 61.321 | STY2764 | 98.4  | STY1015 |
| ATGGCAC +  | STY0521 | 100  | STY2692  | 63.636 | STY0521 | 100   | STY2692 |
| ATGTTTG +  | STY0562 | 100  | HCM2.003 | 62.857 | STY0562 | 99.5  | STY1693 |
| ATGGCTT -  | STY4757 | 100  |          |        | STY4757 | 98.5  |         |
| ATGAACA -  | STY4863 | 100  | STY2727  | 61.538 | STY4863 | 98.7  | STY1494 |
| GTGGCTC -  | STY4928 | 100  | STY0879  | 69     | STY4928 | 98.9  | STY1083 |
| ATGGACC +  | STY4139 | 100  | STY3735  | 60.577 | STY4139 | 98    | STY3735 |
| ATGGCTA -  | STY3415 | 100  | STY2278  | 70     | STY3415 | 99.2  | STY2278 |
| ATGAAAC +  | STY4313 | 100  | STY1447  | 66.019 | STY4313 | 98.8  | STY1447 |
| ATGTCGA +  | STY3943 | 100  | STY3359  | 79     | STY3943 | 98.9  | STY3359 |
| ATGCTGG +  | STY2286 | 100  | STY0492  | 64.078 | STY2286 | 98.6  | STY1405 |
| ATGAAAA -  | STY0451 | 100  | STY3549  | 54.808 | STY0451 | 99.4  | STY3549 |
| ATGACGT +  | STY1344 | 100  | STY2406  | 60.952 | STY1344 | 98.9  | STY2406 |
| ATGAAAA -  | STY4389 | 100  | STY1981  | 63.725 | STY4389 | 98.7  | STY1981 |
| ATGGAGA +  | STY4310 | 100  | STY1097  | 63     | STY4310 | 99.1  | STY1097 |
| ATGGCTT +  | STY2168 | 100  | STY0527  | 69     | STY2168 | 98.6  | STY0527 |
| ATGAACC -  | STY2827 | 100  | STY3481  | 61.165 | STY2827 | 99.1  | STY3481 |
| ATGAATC -  | STY2700 | 100  | STY2256  | 76     | STY2700 | 97.9  | STY2256 |
| ATGATAC +  | STY3887 | 100  | STY3642  | 64.762 | STY3887 | 94.94 | STY3642 |
| ATGCATT -  | STY3016 | 100  | STY3017  | 41     | STY3016 | 98.6  | STY3017 |
| ATGTTTCG + | STY1883 | 100  | STY1077  | 74     | STY1883 | 100   | STY1077 |
| ATGGTAA -  | STY3008 | 100  | STY0793  | 59     | STY3008 | 99.4  | STY0793 |

|           |         |     |          |         |         |       |          |
|-----------|---------|-----|----------|---------|---------|-------|----------|
| GTGAATA - | STY0903 | 100 |          | STY0903 | 98.9    |       |          |
| ATGAATA,+ | STY0886 | 100 | STY1770  | 66.346  | STY0886 | 99.3  | STY1770  |
| ATGACTA,- | STY4323 | 100 | STY0145  | 70.874  | STY4323 | 97.9  | STY0145  |
| ATGGATA + | STY2252 | 100 | STY4242  | 73      | STY2252 | 95.3  | STY1458  |
| ATGCCGT - | STY4487 | 100 | STY1101  | 62.376  | STY4487 | 98.6  | STY1101  |
| ATGGCAC - | STY2107 | 100 | STY1573  | 59.434  | STY2107 | 98.9  | STY4855  |
| GTGAAAA - | STY3546 | 100 | STY4707  | 65.714  | STY3546 | 98.7  | STY1680  |
| TTGGCTA - | STY0052 | 100 | STY1746  | 59.804  | STY0052 | 100   | STY2812  |
| ATGAGCA - | STY0290 | 100 | STY2475  | 58.824  | STY0290 | 99    | STY2475  |
| ATGACGT + | STY1426 | 100 | STY3499  | 69.307  | STY1426 | 98.4  | STY3499  |
| ATGAGGA + | STY3858 | 100 | STY0536  | 60      | STY3858 | 85.91 | STY0536  |
| ATGTTTA,+ | STY0833 | 100 | STY2467  | 69      | STY0833 | 91.02 | STY2467  |
| ATGGCGA + | STY2255 | 100 | STY2281  | 63      | STY2255 | 98    | STY0538  |
| ATGACGC + | STY4497 | 100 |          | STY4497 | 98.48   |       |          |
| ATGATCG + | STY2114 | 100 | STY3198  | 70      | STY2114 | 98.8  | STY3198  |
| ATGCTGT - | STY2268 | 100 | STY0896  | 63      | STY2268 | 99.7  | STY0896  |
| ATGAAGA + | STY4456 | 100 | STY3297  | 86      | STY4456 | 96.59 | HCM1.122 |
| GTGGTTC - | STY2872 | 100 | STY3128  | 63.107  | STY2872 | 94.18 | STY0738  |
| ATGAAGC + | STY0054 | 100 | STY4290  | 66.355  | STY0054 | 99.4  | STY4290  |
| ATGCGCT - | STY4790 | 100 | STY0848  | 62.963  | STY4790 | 97.8  | STY4803  |
| ATGGGTA + | STY1533 | 100 | HCM1.253 | 62.376  | STY1533 | 98.3  | HCM1.253 |
| GTGAAGT - | STY3637 | 100 | STY4906  | 76      | STY3637 | 99.4  | STY4906  |
| ATGTTTC,- | STY3598 | 100 | STY3502  | 63.366  | STY3598 | 99.4  | STY0803  |
| ATGAATA,- | STY3120 | 100 | STY2744  | 61      | STY3120 | 99.03 | STY4144  |
| ATGGCTA - | STY3736 | 100 |          | STY3736 | 99.8    |       |          |
| ATGCAAA + | STY1219 | 100 | STY4311  | 64.151  | STY1219 | 99.3  | STY4311  |
| ATGTTTA(- | STY4320 | 100 | STY4624  | 64.486  | STY4320 | 95.2  | STY0974  |
| ATGCGAA + | STY3540 | 100 | STY4801  | 66.337  | STY3540 | 99.4  | STY4801  |
| ATGACAA - | STY3083 | 100 | STY1862  | 60      | STY3083 | 99.1  | STY2678  |
| GTGACAA + | STY3778 | 100 | STY1288  | 71.287  | STY3778 | 99.6  | STY1288  |
| ATGCTTT,+ | STY3577 | 100 | STY0080  | 66.667  | STY3577 | 99.1  | STY2620  |
| TTGTCTC,- | STY3593 | 100 | STY0043  | 72      | STY3593 | 98.1  | STY0043  |
| ATGCGTT - | STY3609 | 100 | STY2875  | 73.267  | STY3609 | 99.2  | STY2875  |
| TTGTACC - | STY3620 | 100 | STY0690  | 61      | STY3620 | 98.9  | STY1651  |
| ATGGCTA - | STY1855 | 100 | STY1730  | 58.252  | STY1855 | 98.85 | STY1730  |
| GTGAAAG - | STY3731 | 100 | STY2954  | 63.366  | STY3731 | 98.4  | STY2954  |
| ATGGGTT - | STY1352 | 100 | STY0004  | 62.857  | STY1352 | 99.2  | STY3877  |
| ATGACAT,- | STY2127 | 100 | STY2875  | 62      | STY2127 | 99.7  | STY1353  |
| ATGCTGG - | STY3103 | 100 | STY0744  | 63      | STY3103 | 99.1  | STY3813  |
| ATGAAAG + | STY0919 | 100 | STY1829  | 64.706  | STY0919 | 99.3  | STY1829  |
| ATGGCAA + | STY0565 | 100 | STY0135  | 65.347  | STY0565 | 98.7  | STY3986  |
| ATGAACT,+ | STY0999 | 100 |          | STY0999 | 99.2    |       |          |
| ATGCAAA - | STY1486 | 100 | STY1290  | 77      | STY1486 | 98.3  | STY1290  |
| ATGCGCA - | STY0369 | 100 | STY4943  | 61.321  | STY0369 | 98.4  | STY0372  |
| ATGTCTA - | STY1317 | 100 | STY0781  | 65.049  | STY1317 | 99.7  | STY0781  |
| ATGGATC + | STY1909 | 100 | STY2711  | 60.784  | STY1909 | 99.1  | STY1211  |
| TTGAAGA - | STY1948 | 100 | STY2282  | 64.423  | STY1948 | 99.6  | STY0081  |
| ATGGCTC + | STY1979 | 100 | STY1084  | 63.462  | STY1979 | 99.4  | STY1084  |
| ATGTCCT,+ | STY2083 | 100 | STY0903  | 50.943  | STY2083 | 97.9  | STY0903  |
| ATGACTA + | STY0522 | 100 | STY4707  | 72      | STY0522 | 98.8  | STY4707  |
| ATGAGAC + | STY0660 | 100 | STY1736  | 76      | STY0660 | 99.3  | STY2774  |
| ATGTCCT,+ | STY0674 | 100 | STY0062  | 68      | STY0674 | 99.4  | STY0062  |

|           |         |        |          |        |         |       |          |
|-----------|---------|--------|----------|--------|---------|-------|----------|
| ATGCATA + | STY0985 | 100    | STY0924  | 72     | STY0985 | 99    | STY0503  |
| ATGCAAC - | STY0648 | 97     | STY4584  | 68     | STY0648 | 95.1  | STY4584  |
| ATGACCG + | STY1456 | 100    | STY3005  | 65     | STY1456 | 99.3  | STY3005  |
|           | STY2493 | 83     | STY1649  | 80     | STY1002 | 62.2  | STY0365  |
| ATGGATA + | STY1459 | 100    | STY1400  | 58     | STY1459 | 98.5  | STY1400  |
| ATGGCAA + | STY4188 | 100    | STY4406  | 66.055 | STY4188 | 99.2  | STY1349  |
|           | STY1730 | 58.252 | STY1193  | 52.475 | STY1730 | 31.2  | STY1193  |
| ATGAACA - | STY4097 | 100    | STY3100  | 74     | STY4097 | 99.1  | STY3100  |
| ATGTTTG - | STY2971 | 100    |          |        | STY2971 | 97.7  |          |
| ATGGGAA + | STY3115 | 100    | STY3990  | 67     | STY3115 | 98.7  | STY3990  |
| ATGACCC + | STY2877 | 100    | STY0954  | 76     | STY2877 | 97.91 | STY2891  |
| ATGACAA - | STY0452 | 100    | STY1578  | 59.048 | STY0452 | 97.8  | STY1578  |
| ATGAATC + | STY0492 | 100    | STY1910  | 65.714 | STY0492 | 99    | STY1910  |
| ATGCAAC - | STY4227 | 100    |          |        | STY4227 | 91.14 |          |
|           | STY4162 | 100    | STY4786  | 68     | STY4162 | 46.72 | STY4786  |
| ATGCTCG + | STY4118 | 100    | STY3756  | 62     | STY4118 | 99.1  | STY3756  |
| ATGAGGC - | STY4090 | 100    | STY3623  | 65.385 | STY4090 | 98.4  | STY3623  |
| ATGCGCT + | STY0279 | 100    |          |        | STY0279 | 98.7  |          |
| ATGAAAT + | STY0443 | 100    | STY0345  | 59.804 | STY0443 | 99.2  | STY4110  |
| ATGCATG - | STY3315 | 100    | STY2976  | 67     | STY3315 | 99.4  | STY2976  |
| ATGCAAC + | STY2941 | 100    | STY1491  | 65.714 | STY2941 | 98.6  | STY2342  |
| ATGCAGC - | STY4173 | 100    | STY3421  | 72.816 | STY4173 | 98.9  | STY3421  |
| ATGCAGC - | STY4115 | 100    | STY3516  | 65     | STY4115 | 97.7  | STY3516  |
| ATGCAAG - | STY3477 | 100    | STY4293  | 62.5   | STY3477 | 98.7  | STY4293  |
| ATGACGA - | STY3392 | 100    |          |        | STY3392 | 98    |          |
| ATGAAGA - | STY3305 | 100    | STY3946  | 79     | STY3305 | 99.6  | STY0628  |
| ATGAGCA + | STY2948 | 100    |          |        | STY2948 | 99.1  |          |
| ATGAATA - | STY2424 | 100    | STY2425  | 75     | STY2424 | 99.2  | STY2425  |
| GTGAGTA - | STY2462 | 100    | HCM1.63c | 51.485 | STY2462 | 99.8  | HCM1.63c |
| ATGAGTT - | STY2961 | 100    | STY1370  | 74.257 | STY2961 | 98.6  | STY3876  |
| ATGGGTC + | STY2453 | 100    | STY1305  | 62.745 | STY2453 | 99.4  | STY1305  |
|           | STY0327 | 61.386 |          |        | STY0327 | 5.1   |          |
| GTGAAAC - | STY2392 | 100    | STY0501  | 63.889 | STY2392 | 99.46 | STY2394  |
| ATGATTG - | STY0930 | 100    | STY3833  | 53.465 | STY0930 | 98.2  | STY3833  |
| ATGATCC + | STY4368 | 100    | STY0026  | 61.111 | STY4368 | 100   | STY0026  |
| ATGAAAC - | STY2378 | 100    |          |        | STY2378 | 99.8  |          |
| ATGTCTG - | STY2408 | 100    |          |        | STY2408 | 99.7  |          |
| ATGGCTA + | STY4378 | 100    | STY2168  | 64.356 | STY4378 | 99.6  | STY2168  |
| ATGCTAC - | STY4214 | 100    | STY2563  | 64.078 | STY4214 | 99.6  | STY1269  |
| ATGGACC - | STY3521 | 100    | STY0174  | 76.471 | STY3521 | 99.1  | STY1521  |
| ATGGCTG + | STY4885 | 100    | STY2098  | 86     | STY4885 | 99.2  | STY3570  |
| ATGAGTT + | STY4769 | 100    | STY0782  | 63     | STY4769 | 98.5  | STY0782  |
| ATGACAT + | STY4907 | 100    | STY2093  | 57.282 | STY4907 | 99.3  | STY2093  |
| ATGCGCT - | STY4699 | 100    | STY2282  | 58.879 | STY4699 | 99.6  | STY2282  |
| ATGAGCA - | STY4798 | 100    | STY4220  | 78.218 | STY4798 | 98.2  | STY4220  |
| ATGTTCA + | STY3435 | 100    | STY1744  | 64.423 | STY3435 | 99.6  | STY4003  |
| ATGAGCC - | STY0712 | 100    | STY1494  | 59.223 | STY0712 | 99.4  | STY2332  |
| ATGATAA + | STY3501 | 100    | STY4741  | 65     | STY3501 | 99.8  | STY4741  |
| ATGGATT + | STY3414 | 100    |          |        | STY3414 | 99.7  |          |
| ATGCAAG - | STY0211 | 100    |          |        | STY0211 | 99.6  |          |
| ATGATGA - | STY1717 | 100    | STY1209  | 58     | STY1717 | 99.3  | STY1209  |
| ATGGAAC - | STY3200 | 100    | STY3610  | 63     | STY3200 | 99    | STY3610  |

|           |          |        |          |        |          |       |          |
|-----------|----------|--------|----------|--------|----------|-------|----------|
|           | STY1370  | 65.714 | STY1491  | 63.551 | STY3777  | 20.96 | STY1370  |
| ATGTCTT(- | STY1722  | 100    | STY1434  | 60     | STY1722  | 99.5  | STY1434  |
| ATGGAAA - | STY1120  | 100    |          |        | STY1120  | 98.2  |          |
| ATGGATA + | STY0768  | 100    | STY3293  | 66.667 | STY0768  | 38.3  | STY3293  |
| ATGACGC + | STY0821  | 100    | STY1256  | 74     | STY0821  | 98.8  | STY1256  |
| ATGCCGC - | STY0871  | 100    | STY4301  | 61     | STY0871  | 98.4  | STY4301  |
| ATGGTGC - | STY3205  | 100    | STY2112  | 62.136 | STY3205  | 99.5  | STY0171  |
| ATGTTTT(- | STY3093  | 100    | STY4807  | 66     | STY3093  | 99    | STY4807  |
| ATGAGCT + | STY0444  | 100    | STY3692  | 59.804 | STY0444  | 99.4  | STY3692  |
| ATGTCTG - | STY0516  | 100    | STY2510  | 62.617 | STY0516  | 100   | HCM1.135 |
| GTGGGT(-  | STY3332  | 100    | STY0791  | 71     | STY3332  | 99.9  | STY0791  |
| ATGAAAA - | STY3123  | 100    | STY0091  | 70.874 | STY3123  | 100   | STY3150  |
| ATGACGA - | STY2204  | 100    | STY4153  | 75     | STY2204  | 99.1  | STY0678  |
| ATGAAAA - | STY4484  | 100    | STY4503  | 87     | STY4484  | 98.3  | STY0659  |
| ATGACCA + | STY4447  | 100    | HCM2.011 | 57.426 | STY4447  | 98    | HCM2.011 |
| TTGATTA + | STY4691  | 100    | STY0997  | 60.377 | STY4691  | 99.2  | STY0997  |
| ATGGCAA + | STY1156  | 99     | STY1548  | 83     | STY1156  | 98.8  | STY1548  |
|           | STY2470  | 61.165 | STY1168  | 53.465 | STY2470  | 48.56 | STY1168  |
| ATGAAAG + | STY2529  | 100    | STY1223  | 63     | STY2529  | 98.6  | STY1223  |
| ATGTGGA - | STY2478  | 100    | STY3961  | 100    | STY2478  | 98.5  | STY3961  |
| ATGCGAA - | STY4639  | 98     | STY3665  | 75     | STY4639  | 96.2  | STY3665  |
| ATGATTA(- | STY1448  | 100    | STY4741  | 56     | STY1448  | 99.8  | STY4741  |
| ATGAATG - | STY1535  | 100    | STY0412  | 67.327 | STY1535  | 98.3  | STY0412  |
| ATGAACA - | STY1416  | 99     | STY0662  | 69.608 | STY1416  | 98.6  | STY0662  |
| ATGAAAA + | STY2082  | 100    | STY0480  | 54     | STY2082  | 98.7  | STY0480  |
| ATGAAAG - | STY0165  | 100    | STY3252  | 67     | STY0165  | 98.8  | STY4545  |
| ATGAACG + | STY3990  | 100    | STY3115  | 77     | STY3990  | 98.8  | STY3115  |
| ATGCTGA + | STY3900  | 100    |          |        | STY3900  | 99.3  |          |
| ATGAACA + | STY0456  | 100    | STY4417  | 65.385 | STY0456  | 95.54 | STY1247  |
| ATGAAAA - | STY3241  | 100    |          |        | STY3241  | 100   |          |
|           | STY3316  | 60.396 | STY0546  | 50     | STY3316  | 51.69 | STY0546  |
| ATGAAAA + | STY1424  | 100    | STY1192  | 61.111 | STY1424  | 100   | STY1192  |
| ATGAATA + | STY1374  | 100    | STY2039  | 60.185 | STY1374  | 100   | STY2039  |
|           | STY1884  | 48     |          |        | STY1884  | 42.12 |          |
| GTGAAAA - | STY1970  | 100    | STY3951  | 58     | STY1970  | 100   | STY3951  |
|           | STY1513  | 41.176 |          |        | STY1513  | 29.39 |          |
| ATGTGGT + | STY0788  | 100    |          |        | STY0788  | 100   |          |
|           | STY0445  | 62.264 |          |        | STY0445  | 21.33 |          |
|           | STY4165  | 49.505 |          |        | STY4165  | 9.09  |          |
|           | STY2610  | 62.857 | STY4172  | 61.165 | STY2610  | 15.32 | STY4172  |
|           | STY4114  | 64     | STY2547  | 62.745 | STY1292  | 8.75  | STY2547  |
|           | STY1415  | 64     | STY2701  | 60.396 | STY1415  | 48.28 | STY3686  |
|           | HCM1.222 | 70     | STY4290  | 59.091 | HCM1.222 | 53.53 | STY4290  |
|           | STY0929  | 63.208 | STY4114  | 58.824 | STY0929  | 41.94 | STY4114  |
|           | STY3764  | 61.538 | HCM2.005 | 60     | STY3764  | 12.1  | STY4144  |
|           | STY1956  | 100    | STY3110  | 76.238 | STY1956  | 99.4  | STY3110  |
| ATGAATC + | STY1042  | 100    | STY0321  | 61.165 | STY1042  | 96.3  | STY0796  |
|           | STY0958  | 62     | STY2479  | 59.223 | STY2479  | 10.26 | STY3960  |
|           | STY1851  | 36     | STY2481  | 29     | STY1851  | 17.47 | STY2481  |

|           |         |     |          |        |         |      |         |
|-----------|---------|-----|----------|--------|---------|------|---------|
|           | STY3099 | 100 | STY3098  | 78     | STY3099 | 98.2 | STY3098 |
|           | STY3236 | 100 | STY2711  | 85     | STY3236 | 98.5 | STY2711 |
|           | STY0962 | 100 | STY1565  | 81     | STY0962 | 98.6 | STY1565 |
| GTGACTG-  | STY1596 | 100 | STY0396  | 61.682 | STY1596 | 100  | STY0396 |
| ATGGTCG+  | STY1613 | 100 | STY4719  | 49.505 | STY1613 | 100  | STY4719 |
| GTGGCC^+  | STY1629 | 100 | STY4890  | 64.706 | STY1629 | 100  | STY4890 |
| ATGCTGA-  | STY1879 | 100 | STY1198  | 53     | STY1879 | 100  | STY3196 |
| ATGCCTG-  | STY2020 | 100 | STY1067  | 74     | STY2020 | 100  | STY1067 |
| TTGATGA+  | STY3086 | 100 | HCM2.004 | 66.346 | STY3086 | 100  | STY3176 |
| ATGACAA+  | STY1615 | 100 |          |        | STY1615 | 100  |         |
| GTGATGT+  | STY1631 | 100 | STY4755  | 90     | STY1631 | 100  | STY4755 |
| ATGAGTT^+ | STY1887 | 100 | STY3134  | 61.386 | STY1887 | 100  | STY0358 |
| ATGAAAA^- | STY2022 | 100 | STY0417  | 60     | STY2022 | 100  | STY0417 |
| ATGACGA+  | STY3088 | 100 | STY3089  | 63     | STY3088 | 100  | STY3089 |
| ATGCAGC+  | STY3287 | 100 | STY4871  | 64.706 | STY3287 | 100  | STY4871 |
| ATGACCA+  | STY1027 | 100 |          |        | STY1027 | 100  |         |
| ATGACGA+  | STY1048 | 100 | STY1049  | 100    | STY1049 | 100  | STY2038 |
| GTGAAAA+  | STY1065 | 100 |          |        | STY1065 | 100  |         |
| ATGGCAA-  | STY2041 | 100 | STY1046  | 85     | STY2041 | 100  | STY1046 |
| TTGTTTC^+ | STY3289 | 100 | STY4841  | 57.692 | STY3289 | 100  | STY4841 |
| ATGGCAC-  | STY3658 | 100 | STY4645  | 72     | STY3658 | 100  | STY4645 |
| ATGAATA^+ | STY1051 | 100 | STY2036  | 96     | STY1051 | 100  | STY2036 |
| ATGAACG-  | STY2026 | 100 | STY1061  | 95     | STY2026 | 100  | STY1061 |
| TTGCCTG+  | STY3092 | 100 | STY3021  | 64.762 | STY3092 | 100  | STY3021 |
| ATGGATA+  | STY2067 | 100 | STY0418  | 59.615 | STY2067 | 100  | STY3855 |
| GTGAGG^-  | STY2297 | 100 |          |        | STY2297 | 100  |         |
| ATGATGA-  | STY2364 | 100 | STY3164  | 61.905 | STY2364 | 100  | STY1450 |
| ATGGCTT^+ | STY4536 | 100 | STY4451  | 80     | STY4536 | 100  | STY4451 |
| GTGGCAA^+ | STY4559 | 100 | STY0060  | 94.059 | STY4559 | 100  | STY0060 |
| ATGAAAT^+ | STY4576 | 100 |          |        | STY4576 | 100  |         |
| ATGCTGG+  | STY4593 | 100 | STY4594  | 60.577 | STY4593 | 100  | STY4594 |
| ATGAAAT^- | STY4221 | 100 | STY1507  | 76.699 | STY4221 | 100  | STY1507 |
| ATGAACA^+ | STY4539 | 100 |          |        | STY4539 | 100  |         |

|          |         |     |         |        |         |       |         |
|----------|---------|-----|---------|--------|---------|-------|---------|
| ATGAATC- | STY0082 | 100 |         |        | STY0082 | 98.46 |         |
| ATGTCGC+ | STY3494 | 100 | STY2960 | 75.49  | STY3494 | 99    | STY2960 |
| ATGACTA- | STY3534 | 100 | STY0955 | 55.769 | STY3534 | 99.8  | STY0955 |
| ATGCCGC+ | STY3568 | 100 | STY1349 | 75     | STY3568 | 74.17 | STY1349 |

|           |         |     |         |        |         |       |         |
|-----------|---------|-----|---------|--------|---------|-------|---------|
| ATGGAGC-  | STY0730 | 100 | STY0277 | 59.406 | STY0730 | 99.5  | STY0277 |
| ATGAAGC+  | STY0243 | 100 | STY2758 | 79.208 | STY0243 | 99.3  | STY2758 |
| ATGAAGA-  | STY1556 | 100 | STY2521 | 64.078 | STY1556 | 97.7  | STY3945 |
| ATGGCAG+  | STY1527 | 100 | STY1916 | 65.686 | STY1527 | 99.2  | STY1916 |
| ATGCAAA-  | STY4795 | 100 | STY3891 | 62     | STY4795 | 98.3  | STY3891 |
| ATGCATT^- | STY2238 | 100 | STY1389 | 49.02  | STY2238 | 51.82 | STY1389 |
| ATGACGC+  | STY0007 | 100 | STY2710 | 87     | STY0007 | 99.2  | STY2710 |
| ATGGCTG-  | STY1327 | 100 | STY0887 | 76     | STY1327 | 99    | STY0887 |

|           |         |        |          |        |         |       |          |
|-----------|---------|--------|----------|--------|---------|-------|----------|
| ATGAAAC - | STY2226 | 100    | STY1508  | 59.434 | STY2226 | 98.5  | STY1508  |
| ATGACAA - | STY1325 | 100    |          |        | STY1325 | 99.2  |          |
|           | STY0164 | 52.941 | STY4235  | 47.573 | STY0164 | 15.42 | STY4235  |
| ATGCCTT - | STY0111 | 100    | STY2183  | 70     | STY0111 | 98.9  | STY1410  |
| GTGTCGC + | STY3513 | 100    | STY0310  | 59.615 | STY3513 | 98.1  | STY0310  |
|           | STY4610 | 76     |          |        | STY4610 | 23.28 |          |
| ATGACAA - | STY1128 | 100    | STY2904  | 66     | STY1128 | 98.3  | STY4491  |
| ATGTCAC - | STY1166 | 100    | STY3518  | 79     | STY1166 | 99.6  | STY3518  |
| ATGTTTG + | STY1205 | 100    | STY3615  | 67     | STY1205 | 99.5  | STY3615  |
| ATGATTA + | STY1250 | 100    | STY0261  | 62.857 | STY1250 | 99.1  | STY0261  |
| ATGATCA - | STY1848 | 100    | HCM1.103 | 67.961 | STY1848 | 98.1  | HCM1.103 |
| ATGACGA - | STY1192 | 100    | STY2639  | 70     | STY1192 | 98.5  | STY2639  |
| ATGTTTT + | STY1241 | 100    | STY4915  | 63.462 | STY1241 | 99.2  | STY3583  |
| ATGGAAA - | STY4277 | 100    | STY3781  | 66.346 | STY4277 | 98.1  | STY2513  |
| ATGAAAC + | STY4260 | 100    | STY2475  | 61.165 | STY4260 | 97.1  | STY2475  |
| ATGAATA - | STY4895 | 100    | STY0593  | 53.398 | STY4895 | 99.4  | STY0593  |
| ATGCACC - | STY4931 | 99     |          |        | STY4931 | 44.15 |          |
| ATGCGAA + | STY1841 | 100    | STY1000  | 63     | STY1841 | 99.4  | STY1000  |
| TTGCGTC - | STY4899 | 100    |          |        | STY4899 | 95.74 |          |
| ATGGATC - | STY4933 | 100    | STY1541  | 70     | STY4933 | 98.7  | STY1541  |
| ATGGCAA + | STY0298 | 100    | STY4500  | 48.039 | STY0298 | 98.9  | STY4500  |
|           | STY2057 | 63.462 | STY1987  | 55.446 | STY2057 | 6.13  | STY1987  |
| ATGAGAC + | STY2892 | 100    | STY4103  | 60     | STY2892 | 98.1  | STY4103  |
|           | STY2324 | 59     | STY3755  | 55     | STY2324 | 8.33  | STY3755  |
|           | STY0798 | 41.748 |          |        | STY0798 | 8.8   |          |
|           | STY0332 | 85     | STY0333  | 78.218 | STY0332 | 66.9  | STY0333  |
| ATGGGTA - | STY2894 | 100    | STY0628  | 81     | STY2894 | 98.3  | STY0628  |
|           | STY3990 | 37.255 | STY3871  | 32     | STY3990 | 8.82  | STY3871  |
| ATGAAAA + | STY1140 | 100    | STY2519  | 72.277 | STY1140 | 98.9  | STY2519  |
| ATGCAAA - | STY2646 | 100    | STY0996  | 63.107 | STY2646 | 98.2  | STY0996  |
| ATGGAAA - | STY2686 | 100    | STY0414  | 57     | STY2686 | 78.62 | STY4908  |
| TTGTTGT + | STY2728 | 100    | STY2884  | 87     | STY2728 | 99.8  | STY2795  |
| ATGTCCA + | STY0966 | 100    | STY3932  | 60.577 | STY0966 | 99    | STY2109  |
| ATGCCGC + | STY0995 | 100    | STY0286  | 61.386 | STY0995 | 95.5  | STY1744  |
| ATGAATA + | STY3863 | 100    |          |        | STY3863 | 86.05 |          |
| ATGCTGC - | STY2791 | 100    | STY4949  | 64.356 | STY2791 | 98.6  | STY4949  |
| ATGACTG - | STY3791 | 100    | STY1957  | 60.784 | STY3791 | 99.4  | STY1957  |
| ATGCAAT + | STY3755 | 100    | STY2117  | 59     | STY3755 | 99.1  | STY2117  |
| GTGGACC + | STY4509 | 100    | STY1569  | 75     | STY4509 | 97.3  | STY1569  |
|           | STY3070 | 74.51  |          |        | STY3070 | 21.54 |          |
| ATGAAGC - | STY2744 | 100    | STY2651  | 71     | STY2744 | 98.5  | STY2651  |
| ATGAGTT + | STY2805 | 100    | STY4493  | 68.627 | STY2805 | 99.3  | STY4493  |
| TTGCAGG - | STY3802 | 100    | STY0975  | 55.446 | STY3802 | 98    | STY0975  |
|           | STY3925 | 70.476 | STY2439  | 69     | STY3925 | 53.07 | STY2439  |
| ATGCGTT + | STY2979 | 100    | STY0954  | 63.393 | STY2979 | 98.9  | STY0954  |
|           | STY0580 | 62.745 | STY3762  | 61.386 | STY0580 | 8.04  | STY3607  |
| ATGGTTC - | STY4872 | 100    | STY1902  | 58.416 | STY4872 | 98.5  | STY1902  |
| ATGGAAA + | STY2260 | 95     | STY2706  | 74     | STY2260 | 92.9  | STY2706  |
| ATGCGGC - | STY1850 | 100    | STY1937  | 62     | STY1850 | 98.9  | STY1937  |
| GTGCAAC - | STY1584 | 100    | STY1585  | 58     | STY1584 | 99.4  | STY1585  |

|           |          |        |          |        |          |       |          |
|-----------|----------|--------|----------|--------|----------|-------|----------|
| ATGTCAG - | STY1274  | 100    | STY4845  | 63.107 | STY1274  | 95.33 | STY4845  |
| ATGACAA - | STY1253  | 100    | STY1339  | 55.769 | STY1253  | 99.4  | STY1339  |
| ATGAACT+  | STY4318  | 99     | STY3709  | 63.462 | STY4318  | 34.29 | STY4270  |
| ATGCAAA - | STY2149  | 100    | STY1236  | 63.107 | STY2149  | 98.29 | STY1236  |
|           | STY0107  | 59.813 |          |        | STY0107  | 17.57 |          |
|           | STY2443  | 65.094 | STY2563  | 59.434 | STY2563  | 8.35  | STY2443  |
|           | STY0711  | 65.138 | STY2401  | 62.5   | STY4087  | 10.42 | STY0077  |
|           | STY0171  | 60.396 | STY3244  | 59.633 | STY3244  | 14.75 | STY0171  |
|           |          |        |          |        |          |       |          |
| ATGACGA - | STY4820  | 100    | STY3196  | 62.617 | STY4820  | 36.57 | STY1493  |
| ATGAACG - | STY2571  | 100    | STY2383  | 65.049 | STY2571  | 98.9  | STY2383  |
| ATGGGAA - | STY2134  | 100    | STY2909  | 61.165 | STY2134  | 99.7  | STY2909  |
| ATGCAAA - | STY1769  | 100    | STY4428  | 50     | STY1769  | 99.8  | STY4428  |
| ATGAAAA - | STY2289  | 100    | STY3814  | 90     | STY2289  | 97.4  | STY3814  |
| ATGTCGC + | STY3942  | 100    | STY3095  | 66.667 | STY3942  | 97.7  | STY0508  |
| ATGCCGC - | STY2814  | 100    | STY0578  | 56.881 | STY2814  | 99.8  | STY0578  |
| ATGAAAA - | STY0229  | 100    | STY1733  | 92.308 | STY0229  | 99.1  | STY1733  |
| ATGCGTT + | STY0147  | 100    | STY0690  | 61.682 | STY0147  | 99.4  | STY0690  |
| GTGTTAA - | STY0125  | 100    | STY2834  | 64.706 | STY0125  | 99.2  | STY1221  |
| GTGGATA - | STY2617  | 100    | STY1900  | 63     | STY2617  | 99.5  | STY1900  |
| ATGGGTT + | STY1790  | 99     | STY0592  | 62.5   | STY1790  | 98    | STY0592  |
| ATGATGA + | STY2186  | 100    | STY4339  | 86.275 | STY2186  | 99.5  | STY4339  |
| ATGCAGC - | STY2376  | 100    | STY0582  | 66.038 | STY2376  | 99.4  | STY0582  |
| ATGGTAA - | STY1653  | 100    | STY4685  | 65     | STY1653  | 98.6  | STY4685  |
|           | STY2299  | 65.686 | HCM1.203 | 61.321 | STY2299  | 18.67 | HCM1.203 |
| GTGATGA - | STY2304  | 100    | STY1276  | 55.446 | STY2304  | 97.8  | STY1276  |
| ATGTCCC - | STY3931  | 100    |          |        | STY3931  | 98.6  |          |
| ATGGCTA + | STY0241  | 100    | STY3524  | 69     | STY0241  | 99.4  | STY3524  |
| ATGAGTT - | STY0461  | 100    |          |        | STY0461  | 99.2  |          |
| ATGCTAA + | STY0156  | 100    | STY1901  | 63.551 | STY0156  | 99    | STY2146  |
| ATGGAAT - | STY2550  | 100    | STY0635  | 63     | STY2550  | 99.3  | STY3895  |
|           | HCM1.195 | 58.095 | HCM2.008 | 52.475 | HCM1.195 | 29.6  | HCM2.008 |
| ATGGCCC + | STY1024  | 100    | STY4280  | 62.376 | STY1024  | 99.7  | STY4284  |
| ATGACAA + | STY0548  | 100    | STY1266  | 64.486 | STY0548  | 99    | STY1266  |
| ATGGCCA - | STY0538  | 100    | STY4022  | 64     | STY0538  | 98.9  | STY3649  |
| ATGACGA - | STY4701  | 100    | STY4260  | 58.879 | STY4701  | 99.7  | STY4260  |
|           |          |        |          |        |          |       |          |
| ATGGCTA + | STY1035  | 100    | STY3423  | 58.491 | STY1035  | 99.2  | STY0542  |
| ATGCAAA + | STY3364  | 100    | STY0903  | 61.905 | STY3364  | 99.3  | STY0903  |
| ATGAAAG + | STY3396  | 100    | STY0826  | 76     | STY3396  | 99.1  | STY4328  |
| ATGAAAT+  | STY3444  | 100    | STY1520  | 64.762 | STY3444  | 99.1  | STY4087  |
| GTGCTGC - | STY2526  | 100    | STY3601  | 60     | STY2526  | 98.2  | STY3601  |
| ATGGAAC - | STY2663  | 100    | STY4391  | 66.667 | STY2663  | 98.5  | STY4391  |
| ATGAAAC + | STY0567  | 100    | STY3430  | 69.307 | STY0567  | 98.6  | STY3430  |
| ATGTATT+  | STY0033  | 100    | STY0034  | 100    | STY0033  | 71.39 | STY0034  |
|           | STY1578  | 64.356 | STY0819  | 58.491 | STY0819  | 15.5  | STY1578  |
|           | STY2045  | 58.824 | STY0221  | 52.885 | STY2045  | 29.2  | STY0221  |
| ATGTTGT+  | STY2845  | 100    |          |        | STY2845  | 99.4  |          |
| ATGAGCC - | STY3384  | 100    | STY3218  | 64.706 | STY3384  | 99.14 | STY4182  |
| ATGACGT + | STY4224  | 100    | STY0852  | 76     | STY4224  | 98.6  | STY0852  |
| ATGATGA - | STY3461  | 100    | STY1410  | 69     | STY3461  | 99.3  | STY1410  |
| ATGGCAT + | STY0458  | 100    | STY0836  | 63.551 | STY0458  | 99.6  | STY1357  |

|           |          |        |          |        |          |       |          |
|-----------|----------|--------|----------|--------|----------|-------|----------|
| GTGAATA - | STY2677  | 100    | STY2666  | 74     | STY2677  | 97.5  | STY2666  |
| ATGGCGC - | STY0884  | 100    | STY3723  | 66     | STY0884  | 98.8  | STY3723  |
| ATGAGCA + | STY0285  | 100    | STY0534  | 66.038 | STY0285  | 98    | STY1576  |
| ATGAGCC - | STY1698  | 100    | STY1988  | 61     | STY1698  | 99.4  | STY3010  |
| GTGATTG - | STY2582  | 100    | STY2160  | 63.107 | STY2582  | 97.9  | STY0921  |
| ATGGCGA + | STY0013  | 100    | STY1148  | 68.317 | STY0013  | 99.7  | STY1148  |
| ATGACCC + | STY1314  | 100    | STY4235  | 60.909 | STY1314  | 97.3  | STY4235  |
| ATGATCA - | STY2692  | 100    | STY2250  | 71     | STY2692  | 98.2  | STY2701  |
| ATGGCTG - | STY3792  | 100    | STY0667  | 65.766 | STY3792  | 99.3  | STY0667  |
| TTGATTA + | STY0076  | 100    | STY0882  | 62.376 | STY0076  | 95.6  | STY2554  |
| ATGGGAA - | STY2697  | 100    | STY0183  | 86     | STY2697  | 98.2  | STY0183  |
| ATGGCAC - | STY3750  | 100    | STY4929  | 89     | STY3750  | 98.73 | STY4929  |
| ATGGCGC - | STY0799  | 100    | STY3308  | 64.151 | STY0799  | 98.3  | STY1637  |
| ATGGCCA + | STY0792  | 100    | STY3331  | 66     | STY0792  | 98.8  | STY3331  |
| TTGGCAA + | STY2932  | 100    | STY1683  | 64.762 | STY2932  | 98.4  | STY1683  |
| TTGAGTA + | STY1541  | 100    | STY4933  | 69     | STY1541  | 99.5  | STY0624  |
| TTGGGTT - | STY3002  | 100    | STY1766  | 56.436 | STY3002  | 97.2  | STY1766  |
| ATGACTG - | STY1383  | 100    | STY3901  | 65.049 | STY1383  | 99.7  | STY1292  |
| GTGCGTC + | STY3558  | 100    | STY3467  | 63.107 | STY3558  | 99.2  | STY3467  |
| ATGGCGC + | STY0264  | 100    | STY1910  | 91     | STY0264  | 99.6  | STY0413  |
| ATGATGC - | STY1271  | 100    | STY2904  | 72.549 | STY1271  | 99.6  | STY2904  |
| ATGGATC - | STY3717  | 100    |          |        | STY3717  | 99.1  |          |
| ATGAGTT + | STY2606  | 100    | STY0147  | 50     | STY2606  | 99.5  | STY0147  |
| ATGTCCT + | STY4733  | 100    |          |        | STY4733  | 98.52 |          |
| ATGCTGG - | STY1727  | 100    | HCM1.90c | 62     | STY1727  | 95.24 | HCM1.90c |
| ATGTATA + | STY1232  | 100    | STY3421  | 51.429 | STY1232  | 99.1  | STY3421  |
| ATGAACT - | STY1347  | 100    | STY3044  | 61     | STY1347  | 98.8  | STY0186  |
| ATGGTAA + | STY2112  | 100    | STY3205  | 62.136 | STY2112  | 99.7  | STY0815  |
|           | STY4458  | 100    | STY2875  | 58.416 | STY4458  | 92.55 | STY4459  |
|           | STY2074  | 79     | STY4755  | 61.386 | STY2074  | 18.01 | STY4755  |
| ATGTTTA - | STY1179  | 100    | STY4197  | 63     | STY1179  | 95.39 | STY1729  |
| GTGCAGC + | STY0757  | 100    | STY4158  | 55     | STY0757  | 99.1  | STY4158  |
| GTGAACA - | STY3714  | 100    | STY2477  | 63.462 | STY3714  | 98.6  | STY2477  |
| ATGGACC - | STY3581  | 100    |          |        | STY3581  | 99.4  |          |
| ATGGACA + | STY3606  | 100    | STY0036  | 61.165 | STY3606  | 99.5  | STY0036  |
| ATGAGCC - | STY3639  | 100    | STY2842  | 62.745 | STY3639  | 99.7  | STY2842  |
| ATGAGTA + | STY1288  | 100    | STY1488  | 92     | STY1288  | 98.5  | STY1488  |
| ATGTCTA + | STY1952  | 100    | STY1652  | 88     | STY1952  | 99.4  | STY1652  |
| GTGCTGT - | STY1313  | 100    | STY3549  | 59.406 | STY1313  | 99    | STY3549  |
| ATGCTGT - | STY3153  | 100    | STY4473  | 62     | STY3153  | 99.1  | STY1948  |
| ATGATTC + | STY3020  | 100    |          |        | STY3020  | 99.5  |          |
| ATGAGCC - | STY4605  | 99     | STY2886  | 90     | STY4605  | 94.4  | STY2886  |
| ATGGCGA + | STY2251  | 100    | STY2250  | 58.824 | STY2251  | 98.5  | STY2250  |
| ATGACAC - | STY1489  | 100    | STY1287  | 82     | STY1489  | 98.7  | STY1287  |
| ATGGATG - | STY3618  | 100    | STY2275  | 63     | STY3618  | 98.2  | STY2208  |
| ATGACTG - | STY3628  | 100    | STY1589  | 82.178 | STY3628  | 98.1  | STY1589  |
| ATGACAG - | STY3656A | 100    | STY2196  | 50.505 | STY3656A | 100   | STY2196  |
|           | HCM2.005 | 68.627 | STY2490  | 66.667 | HCM2.005 | 10.91 | STY1981  |
| ATGTTGC + | STY1936  | 100    | STY4273  | 62.745 | STY1936  | 98.5  | STY3117  |
| ATGCATA - | STY1335  | 100    | STY0423  | 61.905 | STY1335  | 100   | STY0423  |
| ATGAACA - | STY3059  | 100    |          |        | STY3059  | 98.3  |          |
| ATGGCTA - | STY2086  | 100    | STY2545  | 61.386 | STY2086  | 98.8  | STY2545  |



|            |          |        |          |        |          |       |          |
|------------|----------|--------|----------|--------|----------|-------|----------|
| ATGAACA -  | STY0666  | 100    | STY3766  | 49.505 | STY0666  | 98.8  | STY3766  |
| ATGAATA(+) | STY1517  | 100    | STY3638  | 67     | STY1517  | 98.6  | STY3638  |
| ATGGCCA +  | STY0642  | 100    | STY4620  | 61.765 | STY0642  | 97.8  | STY2401  |
| ATGACCT -  | STY1452  | 100    | STY3940  | 62.857 | STY1452  | 98.8  | STY0503  |
|            | STY2425  | 65.686 | STY3155  | 65.049 | STY3155  | 54.99 | STY3156  |
| ATGAAAA -  | STY1478  | 100    | STY0033  | 64.356 | STY1478  | 96.85 | STY4292  |
| ATGAGTT -  | STY1449  | 100    | STY0767  | 59.434 | STY1449  | 98.1  | STY0767  |
| ATGTCAT(-) | STY1437  | 100    | STY0341  | 63.717 | STY1437  | 98.9  | STY0341  |
| ATGACAA +  | STY2100  | 100    | STY0816  | 75.728 | STY2100  | 92.18 | STY4339  |
| ATGCGCT -  | STY0925  | 100    |          |        | STY0925  | 99    |          |
| ATGGAAC +  | STY0569  | 100    | STY1782  | 70     | STY0569  | 98.4  | STY3378  |
| ATGTCTT +  | STY0571  | 100    | STY4784  | 64     | STY0571  | 99.8  | STY4784  |
| ATGATGA +  | STY0959  | 100    | STY4172  | 66.337 | STY0959  | 99.3  | STY4172  |
| ATGAATA(+) | STY1429  | 100    | STY1819  | 63.81  | STY1429  | 98.4  | STY1819  |
|            | STY1479  | 61.538 | STY1304  | 49     | STY1479  | 30.02 | STY1304  |
| ATGTGGC +  | STY1919  | 100    | STY0786  | 87     | STY1919  | 99.2  | STY0786  |
| ATGGAAT -  | STY1958  | 100    | STY2332  | 88     | STY1958  | 98.8  | STY2332  |
| ATGGATA +  | STY3232  | 100    | STY4252  | 66.019 | STY3232  | 97.6  | STY4252  |
| ATGGCCG -  | STY4126  | 100    | STY3820  | 64     | STY4126  | 99.6  | STY3820  |
|            | HCM1.201 | 91     | STY2365  | 52.475 | HCM1.201 | 59.29 | STY2365  |
| GTGGTAA +  | STY3980  | 100    | STY3981  | 72     | STY3980  | 98.5  | STY3981  |
| GTGGAAA +  | STY3126  | 100    | STY3604  | 68     | STY3126  | 99    | STY3604  |
| GTGAAGT -  | STY3221  | 100    | STY3209  | 60.784 | STY3221  | 99.1  | STY3209  |
|            | STY0508  | 57     | STY1522  | 55.14  | STY0508  | 16.86 | STY1522  |
| ATGTCTA +  | STY2962  | 100    | STY1530  | 65     | STY2962  | 98.9  | STY0636  |
| ATGTCTG -  | STY3240  | 100    | STY0545  | 58.491 | STY3240  | 98.75 | STY0545  |
|            | STY0718  | 63.551 |          |        | STY0718  | 22.89 |          |
| TATGAAG +  | STY4146  | 100    | STY0765  | 61     | STY4146  | 96.45 | STY0602a |
|            | STY2130  | 64.706 | STY4806  | 64     | STY4806  | 32.65 | STY1178  |
|            | STY3270  | 100    | STY0739  | 85     | STY3270  | 52.21 | STY0739  |
| ATGAAAC -  | STY0497  | 100    |          |        | STY0497  | 98.6  |          |
| ATGATAA(+) | STY4213  | 100    | HCM1.271 | 59.223 | STY4213  | 100   | STY1803  |
| ATGGCAA -  | STY3263  | 100    | STY2613  | 61     | STY3263  | 99.7  | STY2613  |
|            | STY0602a | 99     | STY4835  | 66     | STY0602a | 79.26 | STY4835  |
| ATGGCAT +  | STY4777  | 100    | STY4331  | 58.252 | STY4777  | 94.1  | STY0636  |
| ATGACTA +  | STY4911  | 100    | STY4725  | 63.462 | STY4911  | 99.2  | STY0231  |
| ATGACGA +  | STY2938  | 100    | STY3951  | 60.396 | STY2938  | 99.2  | STY1670  |
| ATGCGCT +  | STY2341  | 100    | STY2340  | 73     | STY2341  | 98.6  | STY2340  |
| ATGCTTA(+) | STY2451  | 100    | STY0376  | 67     | STY2451  | 98.9  | STY0376  |
| ATGCCCG -  | STY2309  | 100    | STY0691  | 61.321 | STY2309  | 97.9  | STY0691  |
| ATGACTG +  | STY2344  | 100    | STY4294  | 74     | STY2344  | 99.2  | STY0743  |
| ATGAAAT(+) | STY2438  | 100    |          |        | STY2438  | 99.3  |          |
| ATGACTG -  | STY2335  | 100    | STY0786  | 52     | STY2335  | 100   | STY0786  |
| ATGGAAA -  | STY1977  | 100    | STY3909  | 59.615 | STY1977  | 99.9  | STY3909  |
| ATGCTTA -  | STY4101  | 100    | STY3610  | 64.356 | STY4101  | 99.2  | STY0986  |
| ATGAAAA -  | STY4157  | 100    | STY1399  | 62.745 | STY4157  | 99.2  | STY1091  |
| ATGGAGC -  | STY2426  | 100    | STY0808  | 62.376 | STY2426  | 97.27 | STY0808  |
| ATGGATT -  | STY1900  | 100    | STY2835  | 65.347 | STY1900  | 98    | STY2617  |
| ATGAAAA -  | STY4128  | 100    | HCM2.004 | 59.048 | STY4128  | 98.9  | HCM2.004 |
|            | STY1042  | 100    | STY1803  | 61.905 | STY1042  | 97.1  | STY0321  |
| ATGGCAA +  | STY4731  | 100    | STY2466  | 67     | STY4731  | 98.1  | STY2466  |

|           |          |        |         |        |          |       |         |
|-----------|----------|--------|---------|--------|----------|-------|---------|
| TTGAAA -  | STY3361  | 100    | STY1127 | 63.462 | STY3361  | 98.8  | STY3924 |
| GTGTTAG - | STY3456  | 100    | STY3630 | 91     | STY3456  | 99.8  | STYnml  |
| ATGGCAA - | STY3331  | 100    | STY0792 | 66.355 | STY3331  | 99.5  | STY2524 |
| ATGGAAG - | STY3223  | 100    | STY0522 | 59.091 | STY3223  | 99.8  | STY0522 |
| ATGATCC + | STY3504  | 100    | STY4613 | 62.5   | STY3504  | 98.7  | STY4301 |
| ATGTCCT + | STY4027  | 100    | STY4821 | 64.423 | STY4027  | 98.5  | STY4821 |
| ATGAAAA + | STY3337  | 100    |         |        | STY3337  | 98.5  |         |
| ATGTAA -  | STY1404  | 100    | STY4095 | 63.551 | STY1404  | 99.5  | STY0123 |
| ATGACTG + | STY4023  | 100    | STY4796 | 78     | STY4023  | 98.6  | STY4796 |
| TTGGCTT + | STY3329  | 100    | STY3675 | 64.151 | STY3329  | 90.65 | STY3675 |
| ATGAAAA + | STY3237  | 100    | STY0979 | 82     | STY3237  | 98.9  | STY0979 |
| ATGTCGA + | STY1110  | 100    | STY0400 | 60.784 | STY1110  | 97.5  | STY0400 |
| ATGAAAC + | STY0818  | 100    | STY4754 | 62.264 | STY0818  | 99.4  | STY4754 |
| ATGAGCC + | STY3250  | 100    | STY0076 | 67.961 | STY3250  | 98.6  | STY0076 |
| ATGTGTG + | STY1084  | 100    | STY0590 | 66.981 | STY1084  | 99.4  | STY1979 |
| ATGAAGC + | STY0794  | 100    | STY0468 | 85.149 | STY0794  | 98.27 | STY0468 |
| ATGAGTT + | STY0828  | 100    | STY0643 | 60.396 | STY0828  | 99.1  | STY4086 |
| ATGACCG + | STY0881  | 100    | STY0900 | 74     | STY0881  | 99.4  | STY0900 |
| ATGGTAA + | STY1465  | 99     |         |        | STY1465  | 98.6  |         |
| ATGAGTC - | STY0482  | 100    |         |        | STY0482  | 100   |         |
| ATGCACA - | STY3183  | 100    |         |        | STY3183  | 98.7  |         |
| ATGAGTG + | STY3255  | 100    | STY3423 | 86     | STY3255  | 99    | STY3423 |
| ATGTTTG + | STY0529  | 100    | STY2499 | 63.208 | STY0529  | 99.1  | STY2499 |
| ATGGAAT + | STY0630  | 100    | STY2864 | 57     | STY0630  | 98.2  | STY2864 |
| ATGAAGA - | STY2739  | 100    |         |        | STY2739  | 99.2  |         |
|           | STY2980  | 60     |         |        | STY2980  | 28.97 |         |
| ATGAAAA + | STY2377  | 100    | STY0891 | 51.456 | STY2377  | 100   | STY2785 |
| TTGTCAC - | STY0385  | 99     |         |        | STY0385  | 99    |         |
| ATGGCTA + | STY0449  | 100    |         |        | STY0449  | 99.7  |         |
| ATGGCCA + | STY4093  | 100    | STY0401 | 61     | STY4093  | 100   | STY0401 |
| ATGATTA - | STY4735  | 100    | STY3230 | 63.107 | STY4735  | 98.2  | STY3230 |
| ATGTGCA + | STY2978  | 100    | STY3314 | 70.874 | STY2978  | 99.6  | STY3314 |
| ATGCCAA - | STY1154  | 100    |         |        | STY1154  | 99.1  |         |
| ATGAAAC + | STY1875  | 100    |         |        | STY1875  | 98.54 |         |
| ATGTTTG - | STY1799  | 100    | STY4458 | 63.725 | STY1799  | 98.6  | STY0519 |
| TTGACTA + | STY4013  | 100    | STY2875 | 61.538 | STY4013  | 99    | STY2875 |
| ATGAGAC + | STY4012  | 100    | STY3876 | 69.307 | STY4012  | 98.8  | STY2981 |
| ATGAATG - | STY0065  | 99     | STY3533 | 99     | STY0065  | 96.3  | STY3533 |
| ATGGCTA + | STY0018  | 100    |         |        | STY0018  | 96.9  |         |
| ATGACCA - | STY0066  | 100    |         |        | STY0066  | 98.7  |         |
| ATGATTC + | STY0019  | 100    | STY0020 | 100    | STY0020  | 60.92 | STY0019 |
| ATGAGAC - | STY0035  | 100    | STY0038 | 67.647 | STY0035  | 99.6  | STY0038 |
| ATGAAAA - | STY0108  | 100    | STY1809 | 90     | STY0108  | 98.3  | STY1809 |
| ATGTCCG + | STY1183  | 100    | STY4123 | 46.602 | STY1183  | 100   | STY4123 |
| ATGATGA - | STY1451  | 100    | STY0660 | 58.654 | STY1451  | 100   | STY0660 |
| ATGATCA + | STY1402  | 100    | HCM1.97 | 58     | STY1402  | 99.6  | HCM1.97 |
| ATGCTTA - | STY1461  | 100    | STY4103 | 61.682 | STY1461  | 99.1  | STY4103 |
|           | STY4670  | 59.223 |         |        | STY4670  | 32.69 |         |
| ATGAGCA + | STY3417  | 100    | STY3931 | 62.5   | STY3417  | 100   | STY3931 |
|           | STY0305  | 61.321 |         |        | STY0305  | 17.04 |         |
|           | HCM1.231 | 64.706 | STY0732 | 63.551 | HCM1.231 | 11.21 | STY0732 |
|           | STY1400  | 62.745 | STY4611 | 62     | STY2110  | 2.07  | STY1400 |

|           |          |        |          |        |          |       |          |
|-----------|----------|--------|----------|--------|----------|-------|----------|
|           | STY3447  | 60.377 | HCM1.167 | 57.426 | STY3447  | 12.75 | HCM1.167 |
|           | STY2467  | 54.717 |          |        | STY2467  | 11.1  |          |
|           | STY0716  | 36.634 |          |        | STY0716  | 10.5  |          |
|           | STY3214  | 57.944 | STY3367  | 48     | STY3214  | 30.05 | STY3367  |
|           | STY1289  | 64.815 | STY3652  | 62.5   | STY3652  | 24.66 | STY1289  |
|           | STY2205  | 71.569 | STY4597  | 68.627 | STY4597  | 56.23 | STY2205  |
|           | STY1629  | 58.252 | STY2434  | 44     | STY1629  | 23.05 | STY2434  |
|           | STY3052  | 61.386 | STY0018  | 56.863 | STY3052  | 27.27 | STY0018  |
|           | HCM2.013 | 70     | STY0288  | 57.282 | HCM2.013 | 50.77 | HCM1.54  |
| ATGCGTG-  | STY4618  | 99     | STY3684  | 86     | STY4618  | 91.46 | STY3684  |
|           | STY2894  | 100    | STY0628  | 70     | STY2894  | 98.9  | STY0628  |
|           | STY3047  | 62.5   | STY3214  | 61.386 | STY2473  | 15.84 | STY3966  |
|           | STY3124  | 63.551 |          |        | STY3124  | 13.72 |          |
| ATGAAAT(- | STY3270  | 100    | STY0739  | 79     | STY3270  | 98.5  | STY0739  |
| ATGGAAC+  | STY0327  | 100    |          |        | STY0327  | 100   |          |
| ATGAGTC-  | STY0746  | 100    | STY4235  | 88     | STY0746  | 100   | STY4235  |
| ATGGCGA+  | STY1031  | 100    | STY2305  | 61.321 | STY1031  | 100   | STY2305  |
| ATGTGGA+  | STY1053  | 100    | STY2034  | 98     | STY1053  | 100   | STY2034  |
| ATGCGAT+  | STY1069  | 100    | STY2017  | 92     | STY1069  | 100   | STY2017  |
| ATGAAAA-  | STY2045  | 100    |          |        | STY2045  | 100   |          |
| ATGCCCG-  | STY0945  | 100    | STY4039  | 56.436 | STY0945  | 100   | STY4039  |
| ATGCATA+  | STY1033  | 100    | STY2633  | 60     | STY1033  | 100   | STY2053  |
| ATGAGTT+  | STY1055  | 100    | STY2032  | 90     | STY1055  | 100   | STY2032  |
| ATGAGCA+  | STY1071  | 100    | STY2015  | 100    | STY1071  | 100   | STY2015  |
| ATGAGAG-  | STY2047  | 100    | STY1478  | 57     | STY2047  | 100   | STY1478  |
| ATGGCTT-  | STY2063  | 100    | STY1342  | 62.376 | STY2063  | 100   | STY4067  |
| ATGACTG+  | STY1633  | 100    | STY4615  | 57     | STY1633  | 100   | STY4615  |
| ATGAAAA-  | STY1890  | 100    | STY1362  | 69     | STY1890  | 100   | STY1362  |
| ATGGAGC-  | STY2024  | 100    | STY1063  | 68     | STY2024  | 100   | STY1063  |
| ATGAACC+  | STY3090  | 100    | STY2081  | 60     | STY3090  | 100   | STY4111  |
| ATGAACA-  | STY2065  | 100    | STY2066  | 47     | STY2065  | 100   | STY2066  |
| GTGAAAT-  | STY2209  | 100    | STY1339  | 91     | STY2209  | 100   | STY1339  |
| TTGAATC,+ | STY2003  | 100    | STY1413  | 60.952 | STY2003  | 100   | STY1413  |
|           | STY1077  | 100    | STY1883  | 74     | STY1077  | 100   | STY1883  |
| ATGGTGC-  | STY2051  | 100    | STY0364  | 61.386 | STY2051  | 100   | STY0364  |
| ATGACTA-  | STY0065  | 100    | STY3533  | 100    | STY3533  | 100   | STY0065  |
| ATGAGCC+  | STY3668  | 100    | STY4635  | 95     | STY3668  | 100   | STY4635  |
| ATGAACC+  | STY3684  | 100    | STY4618  | 91     | STY3684  | 100   | STY4618  |
| ATGACCG+  | STY4663  | 100    | STY3574  | 53.398 | STY4663  | 100   | STY3574  |
| ATGTTGA-  | STY4680  | 100    | STY4678  | 97     | STY4680  | 100   | STY4821  |
| ATGAAAA+  | STY4832  | 100    |          |        | STY4832  | 100   |          |
| ATGAGTG-  | STY4881  | 100    |          |        | STY4881  | 100   |          |
| ATGAAAT(- | STY4632  | 100    | STY3516  | 92.079 | STY4632  | 100   | STY3516  |
| ATGCCCC+  | STY4664  | 100    | STY3132  | 64.151 | STY4664  | 100   | STY3132  |

STY3315 60.784

STY3315 46.54

|            |          |        |          |        |          |       |          |
|------------|----------|--------|----------|--------|----------|-------|----------|
| ATGCGAA +  | STY3955  | 100    | STY2481  | 76     | STY3955  | 99    | STY2481  |
| ATGAAAA +  | STY0473  | 100    | STY4772  | 66     | STY0473  | 98.7  | STY0985  |
| ATGACGC -  | STY2222  | 100    | STY3554  | 59.406 | STY2222  | 98.6  | STY3554  |
| GTGAAAC +  | STY0047  | 100    | STY2479  | 58.929 | STY0047  | 98.5  | STY2479  |
| ATGAAGA +  | STY0085  | 100    | STY2668  | 65.714 | STY0085  | 99.6  | STY2668  |
| ATGAGTA +  | STY3823  | 100    | STY3252  | 61     | STY3823  | 99    | STY3252  |
| ATGCTAT, - | STY3350  | 100    | STY4275  | 61.538 | STY3350  | 99.3  | STY4876  |
| ATGAAAA, - | STY3506  | 100    | STY0749  | 60     | STY3506  | 98.9  | STY3109  |
| ATGAGTC -  | STY3546a | 100    |          |        | STY3546a | 100   |          |
| ATGGCAA +  | STY3570  | 100    | STY0519  | 92     | STY3570  | 98.8  | STY0519  |
| ATGAACA +  | STY0704  | 100    | STY0637  | 50.485 | STY0704  | 97.48 | STY0637  |
| ATGATGA +  | STY0177  | 100    | STY0120  | 62.5   | STY0177  | 98.3  | HCM1.231 |
| ATGTTAG +  | STY0196  | 99     | STY3814  | 59.813 | STY0196  | 89.6  | STY0786  |
| ATGGCTG +  | STY0232  | 100    | STY2732  | 68     | STY0232  | 97.9  | STY2732  |
| ATGGTGA +  | STY0266  | 100    | STY2384  | 58.416 | STY0266  | 98.9  | STY2384  |
|            | STY1536  | 75     | STY1355  | 66.346 | STY0871  | 11.22 | STY1536  |
|            | STY0589  | 57.426 |          |        | STY0589  | 13.22 |          |
| ATGAAAA, + | STY4268  | 100    | STY4819  | 66     | STY4268  | 96.2  | STY4819  |
|            | STY4573  | 63.462 | STY3917  | 57.009 | STY3917  | 12.26 | STY4573  |
| ATGAATA, - | STY4940  | 100    | STY0024  | 57.658 | STY4940  | 97.8  | STY0024  |
|            | STY2309  | 63.107 | STY4003  | 54     | STY2309  | 7.16  | STY4003  |
|            | STY4835  | 95     | STY0602a | 64     | STY4835  | 62.82 | STY0602a |
|            | STY0281  | 62.617 | STY2584  | 60     | STY2584  | 23.67 | STY3394  |
| ATGGCAG -  | STY4613  | 100    | STY3689  | 88     | STY4613  | 90.8  | STY3689  |
|            | STY2834  | 35.644 |          |        | STY2834  | 7.83  |          |
| ATGTGCG +  | STY0356  | 100    | STY0004  | 61.321 | STY0356  | 99.5  | STY0004  |
| ATGAATA, - | STY2901  | 100    | STY2769  | 61.386 | STY2901  | 98.87 | STY2769  |
| ATGAAGG +  | STY1134  | 100    | STY2407  | 68.317 | STY1134  | 99.1  | STY2407  |
| ATGGAGA +  | STY1172  | 100    | STY4156  | 66.99  | STY1172  | 99.7  | STY2040  |
|            | STY4624  | 59.615 |          |        | STY4624  | 8.36  |          |
| ATGCCAG +  | STY1124  | 100    | STY2329  | 79     | STY1124  | 99.4  | STY2329  |
| GTGTGTC +  | STY1162  | 100    | HCM2.002 | 79     | STY1162  | 99    | HCM2.002 |
| ATGCAAT, - | STY1195  | 100    | STY3579  | 60.577 | STY1195  | 97.7  | STY3579  |
| ATGATCA, + | STY1246  | 100    | STYrarB  | 71.287 | STY1246  | 98.9  | STYrarB  |
|            | STY3759  | 77     | STY0646  | 66.019 | STY3759  | 47.89 | STY0646  |
| ATGGAAG +  | STY4396  | 100    |          |        | STY4396  | 97.84 |          |
| ATGTCCG -  | STY1202  | 100    | STY4787  | 89     | STY1202  | 98.6  | STY1673  |
| ATGAAAA, - | STY4290  | 100    | STY0054  | 63.81  | STY4290  | 98.7  | STY0054  |
|            | STY1287  | 61.165 | STY2981  | 60.377 | STY1159  | 15.53 | STY3946  |
| ATGACTC -  | STY4232  | 100    |          |        | STY4232  | 99.5  |          |
| ATGAGCG +  | STY3797  | 100    | STY2693  | 74.257 | STY3797  | 99.4  | STY2693  |
|            | STY1562  | 65.094 | STY3006  | 64.545 | STY3006  | 22.5  | STY1562  |
|            | STY0605  | 67     |          |        | STY0605  | 19.39 |          |
| ATGGCAG +  | STY4442  | 100    | STY4522  | 78     | STY4442  | 99.4  | STY4522  |
| ATGAAAA, + | STY4482  | 100    | STY4189  | 68.932 | STY4482  | 98.2  | STY4189  |
| ATGCGAA -  | STY3054  | 100    |          |        | STY3054  | 99.2  |          |
| TTGAAAC, + | STY0904  | 100    | STY2614  | 56.863 | STY0904  | 98.7  | STY2614  |
| TTGCGCC +  | STY2610  | 100    | STY0131  | 67     | STY2610  | 98.6  | STY2281  |
|            | STY1097  | 36.275 |          |        | STY1097  | 7.49  |          |
|            | HCM2.001 | 63.462 | HCM2.005 | 62     | HCM2.005 | 10.34 | STY1491a |
| ATGAAAC, + | STY2778  | 100    | STY0002  | 65     | STY2778  | 99.1  | STY4769  |
| ATGAAAA, + | STY4402  | 100    | STY0400  | 84     | STY4402  | 98.9  | STY0400  |

|           |         |        |         |        |         |       |         |
|-----------|---------|--------|---------|--------|---------|-------|---------|
|           | STY1633 | 78     | STY4884 | 64.762 | STY1633 | 33.11 | STY4884 |
| ATGAGCC + | STY4476 | 100    | STY2599 | 62.5   | STY4476 | 99.5  | STY1899 |
| ATGCTAA - | STY4515 | 100    | STY2988 | 68     | STY4515 | 99.4  | STY2988 |
| GTGCGCC + | STY4707 | 100    | STY0522 | 72     | STY4707 | 98.97 | STY0522 |
| ATGTTTC + | STY2639 | 100    | STY1192 | 70     | STY2639 | 99    | STY1192 |
| ATGTCTC - | STY2683 | 100    | STY0670 | 59.813 | STY2683 | 99    | STY0670 |
| ATGGCTT - | STY2726 | 100    | STY3495 | 56     | STY2726 | 98.9  | STY3495 |
| ATGCGAA + | STY1819 | 100    | STY1429 | 64.423 | STY1819 | 98.3  | STY0456 |
| ATGAAAA + | STY0029 | 100    | STY0594 | 66     | STY0029 | 98.2  | STY0594 |
| ATGCATA + | STY4730 | 100    | STY3608 | 60     | STY4730 | 98.7  | STY3608 |
| ATGCGAA + | STY4770 | 100    | STY3044 | 58.416 | STY4770 | 100   | STY3044 |
| ATGAAAA - | STY2500 | 100    | STY3945 | 77     | STY2500 | 98.8  | STY3945 |
| ATGATCC - | STY2549 | 100    | STY1770 | 61.905 | STY2549 | 99.7  | STY1770 |
| ATGAGAA - | STY2542 | 100    | STY3409 | 66     | STY2542 | 100   | STY3409 |
| ATGTCTG + | STY2569 | 100    | STY3479 | 60.952 | STY2569 | 99    | STY3479 |
| ATGCGCC + | STY2263 | 100    | STY2778 | 50     | STY2263 | 99.3  | STY2778 |
| ATGAATG - | STY3424 | 100    | STY2567 | 72     | STY3424 | 98.3  | STY2567 |
|           | STY3087 | 83     | STY3175 | 67.619 | STY3087 | 59.48 | STY3175 |
| ATGAGCT - | STY1186 | 100    |         |        | STY1186 | 99.5  |         |
|           | STY3089 | 66     | STY3088 | 59     | STY3089 | 52.61 | STY3088 |
| ATGACGA - | STY0399 | 100    | STY3876 | 73.267 | STY0399 | 98.6  | STY3876 |
| ATGACCT + | STY1832 | 100    | STY1565 | 63.107 | STY1832 | 99.1  | STY1565 |
| ATGCAAC + | STY1694 | 100    | STY2458 | 66     | STY1694 | 98.8  | STY2458 |
| GTGACTC + | STY4739 | 100    | STY0917 | 66.667 | STY4739 | 95.9  | STY0917 |
|           |         |        |         |        |         |       |         |
| ATGAAAC - | STY2586 | 100    | STY3046 | 68     | STY2586 | 98.4  | STY3046 |
| ATGTCAC - | STY1773 | 100    |         |        | STY1773 | 99.2  |         |
| ATGGCTG - | STY1751 | 100    | STY1650 | 69.307 | STY1751 | 98    | STY1650 |
| ATGACGT + | STY4910 | 100    | STY0438 | 58     | STY4910 | 98.7  | STY0438 |
| ATGCACA + | STY1570 | 100    | STY1680 | 63.551 | STY1570 | 98.5  | STY1680 |
| ATGAATG + | STY4008 | 100    | STY0278 | 70.297 | STY4008 | 99.2  | STY0278 |
| ATGGCGA + | STY4426 | 100    | STY4257 | 76     | STY4426 | 98.8  | STY4257 |
| ATGGACC - | STY3896 | 100    | STY2422 | 74     | STY3896 | 95.93 | STY2422 |
| GTGGCAA + | STY0275 | 100    | STY3709 | 54.206 | STY0275 | 99.3  | STY3709 |
| ATGGCGC - | STY2199 | 100    | STY0823 | 61.682 | STY2199 | 98.3  | STY0823 |
| ATGGAAA - | STY4437 | 100    | STY4437 | 58.824 | STY4437 | 99    | STY4437 |
| ATGACGC - | STY1809 | 100    | STY1136 | 66.346 | STY1809 | 85.3  | STY1536 |
| ATGCGTA - | STY1805 | 100    | STY0888 | 62.745 | STY1805 | 98.4  | STY0888 |
|           | STY0083 | 73     | STY4166 | 62.136 | STY0083 | 56.82 | STY4733 |
| GTGGTAA + | STY1680 | 100    | STY3546 | 62.745 | STY1680 | 96.41 | STY3546 |
| ATGTCTA + | STY1215 | 100    | STY1217 | 65.347 | STY1215 | 99.9  | STY1217 |
| ATGAAAA - | STY2305 | 100    | STY3632 | 77     | STY2305 | 97.7  | STY3632 |
| ATGACGT + | STY0364 | 100    | STY2649 | 60.577 | STY0364 | 99.8  | STY1256 |
| ATGACGA - | STY4869 | 100    | STY2475 | 61.765 | STY4869 | 100   | STY3176 |
| ATGAAGC - | STY4945 | 100    | STY0021 | 65     | STY4945 | 98.2  | STY0021 |
| ATGATGA + | STY4183 | 100    | STY3121 | 63.366 | STY4183 | 98.6  | STY3121 |
| ATGGACA - | STY3453 | 100    | STY2969 | 62.385 | STY3453 | 99.3  | STY2969 |
| ATGCGTA - | STY2536 | 100    | STY4949 | 62.136 | STY2536 | 98.4  | STY4949 |
| ATGAGCC + | STY2515 | 100    | STY3904 | 65.049 | STY2515 | 99.3  | STY3904 |
| ATGAATC + | STY2729 | 100    | STY2555 | 27     | STY2729 | 99.2  | STY2555 |
| ATGCAAA - | STY0551 | 100    |         |        | STY0551 | 99.4  |         |
|           | STY1901 | 63.107 | STY3144 | 57.843 | STY1901 | 34.96 | STY3144 |

|           |         |        |          |        |         |       |          |
|-----------|---------|--------|----------|--------|---------|-------|----------|
|           | STY0816 | 60.194 | STY2389  | 40     | STY0816 | 22.3  | STY2389  |
| ATGTTTG,+ | STY4047 | 100    | HCM1.247 | 73     | STY4047 | 97.9  | HCM1.247 |
| ATGTTGC + | STY4169 | 100    | STY1305  | 66.981 | STY4169 | 99.4  | STY1368  |
| ATGAGTA + | STY4172 | 100    | STY1309  | 71.154 | STY4172 | 97.6  | STY1309  |
| ATGACCT + | STY4266 | 100    | STY1660  | 70     | STY4266 | 97.1  | STY1660  |
|           | STY2950 | 48     | STY0575  | 38     | STY2950 | 14.42 | STY0575  |
| ATGAGTA + | STY1022 | 100    | STY1022  | 56     | STY1022 | 99.8  | STY1022  |
| ATGGCAA + | STY4808 | 100    | STY0961  | 61.165 | STY4808 | 99.3  | STY0961  |
| ATGCCAG + | STY3073 | 100    | STY0971  | 66     | STY3073 | 97.8  | STY0971  |
| ATGGCTA - | STY4800 | 100    | STY1386  | 62     | STY4800 | 99.1  | STY4553  |
| ATGAGTG - | STY3768 | 100    | STY0002  | 75     | STY3768 | 98.4  | STY4416  |
| ATGGCCC - | STY0747 | 100    | STY1143  | 62.963 | STY0747 | 98.5  | STY2479  |
| ATGCTGA + | STY0753 | 100    | STY2339  | 70     | STY0753 | 99.4  | STY2339  |
| ATGATAA(+ | STY0590 | 100    | STY1975  | 68.571 | STY0590 | 98.2  | STY1975  |
| ATGATGG + | STY2812 | 100    | HCM1.158 | 64.762 | STY2812 | 98.9  | STY1383  |
| GTGGCAA - | STY3824 | 100    | STY2342  | 65.094 | STY3824 | 99.3  | STY4118  |
| ATGAAAT(- | STY0696 | 100    | STY0697  | 86     | STY0696 | 87.27 | STY0697  |
| ATGGATC - | STY0289 | 100    | HCM1.227 | 66.667 | STY0289 | 98.9  | STY4286  |
| ATGAACG + | STY2806 | 100    | STY0259  | 84     | STY2806 | 99.4  | STY0259  |
| ATGCAAG + | STY4294 | 100    | STY2344  | 74     | STY4294 | 98.9  | STY3812  |
| ATGCCGT - | STY1356 | 100    | STY0887  | 65     | STY1356 | 98.6  | STY4171  |
| ATGGCAC - | STY0129 | 100    | STY4189  | 52     | STY0129 | 97.2  | STY4189  |
| ATGGCTG - | STY1302 | 100    | STY2698  | 69     | STY1302 | 98.8  | STY2700  |
| ATGGGCC - | STY3015 | 100    | STY0511  | 63.208 | STY3015 | 99.1  | STY0511  |
| GTGAACA - | STY2696 | 100    | STY0781  | 78.218 | STY2696 | 99.1  | STY0781  |
| ATGAGTC - | STY3849 | 100    |          |        | STY3849 | 99.3  |          |
| GTGAGTC - | STY0684 | 100    | STY0036  | 67     | STY0684 | 99.4  | STY2394  |
| ATGCTAA + | STY3720 | 100    |          |        | STY3720 | 99.6  |          |
| ATGAACA + | STY3856 | 100    |          |        | STY3856 | 99.1  |          |
| GTGAGTT - | STY3879 | 100    | STY0376  | 42     | STY3879 | 100   | STY0376  |
| ATGAAAA + | STY1542 | 100    | STY3594  | 59.259 | STY1542 | 99.1  | STY3594  |
| ATGGCCG + | STY1230 | 100    | STY0399  | 59     | STY1230 | 100   | STY0399  |
| ATGTCAC - | STY1381 | 100    | STY4274  | 89     | STY1381 | 99.6  | STY0403  |
| ATGGGTC + | STY2742 | 100    | STY1900  | 60.185 | STY2742 | 98.7  | STY1900  |
| ATGAAAA(+ | STY3543 | 99     | STY3542  | 64     | STY3543 | 98.5  | STY3542  |
| ATGAAAA + | STY4076 | 100    | STY1520  | 59     | STY4076 | 97.7  | STY1520  |
| ATGATGC + | STY0342 | 99     | STY4302  | 59.615 | STY0342 | 51.83 | STY4302  |
| ATGTTAC(+ | STY3725 | 99     | STY1326  | 67     | STY3725 | 95.3  | STY0642  |
| ATGAAAC - | STY4010 | 100    |          |        | STY4010 | 99.7  |          |
| ATGCATC + | STY2156 | 100    | STY1981  | 75.728 | STY2156 | 99.4  | STY1981  |
| ATGGAAA + | STY3908 | 100    | STY2280  | 61     | STY3908 | 100   | STY2280  |
| ATGAATG - | STY2242 | 100    | STY3783  | 79     | STY2242 | 99.2  | STY3783  |
| ATGTCTT(- | STY4493 | 100    | STY2805  | 70     | STY4493 | 98.1  | STY0738  |
| ATGGTTT,- | STY2120 | 100    | STY2581  | 59.406 | STY2120 | 99.04 | STY2581  |
| ATGTCGT + | STY1339 | 100    | STY1306  | 61.765 | STY1339 | 98.9  | STY0130  |
| ATGCAAA - | STY2857 | 100    | STY0801  | 82.178 | STY2857 | 99.5  | STY0801  |
| ATGAGTA - | STY3098 | 100    | STY3099  | 86     | STY3098 | 97.6  | STY3099  |
| ATGCTGA - | STY0467 | 100    | STY1266  | 73     | STY0467 | 98.2  | STY4257  |
| ATGCAAT(+ | STY3582 | 100    | STY3209  | 85     | STY3582 | 99.8  | STY3460  |
| ATGCTGA - | STY3607 | 100    | HCM1.07c | 95     | STY3607 | 98.8  | HCM1.07c |
|           | STY3632 | 100    |          |        | STY3632 | 71.11 |          |
| ATGAATC(- | STY2093 | 100    | STY3470  | 66.667 | STY2093 | 99.4  | STY3653  |

|           |         |     |          |        |         |       |          |
|-----------|---------|-----|----------|--------|---------|-------|----------|
| ATGCGTT - | STY3642 | 100 | HCM1.103 | 66     | STY3642 | 98.7  | STY3608  |
| ATGGCAA - | STY0124 | 100 | STY3491  | 67.327 | STY0124 | 98.74 | STY3491  |
| GTGATTC + | STY1303 | 100 |          |        | STY1303 | 98.8  |          |
| ATGACTG + | STY1915 | 100 | STY1526  | 77.228 | STY1915 | 98.1  | STY1526  |
| ATGAAAC - | STY3142 | 100 | HCM2.011 | 76.699 | STY3142 | 99.5  | STY3931  |
| ATGAGCT + | STY1308 | 100 | STY0887  | 78     | STY1308 | 99.5  | STY4171  |
| ATGAAAC + | STY3833 | 100 | STY0875  | 66.337 | STY3833 | 99.1  | STY0190  |
| ATGGACG + | STY3604 | 100 | STY3126  | 68     | STY3604 | 99.2  | STY3126  |
| GTGATTG - | STY3650 | 100 | STY3764  | 54.902 | STY3650 | 99.7  | STY3764  |
| ATGGCAA + | STY1933 | 100 | HCM2.005 | 63.725 | STY1933 | 99    | HCM2.005 |
| ATGCAAT - | STY1294 | 100 | STY2741  | 60.396 | STY1294 | 98.9  | STY2741  |
| ATGACGA + | STY1467 | 100 | STY4116  | 79     | STY1467 | 99.2  | STY3298  |
| ATGAACA - | STY1976 | 100 | STY4271  | 70.874 | STY1976 | 98.8  | STY4271  |
| GTGCAAC - | STY2098 | 100 | STY4314  | 59.223 | STY2098 | 98.7  | STY4314  |
| ATGTCCG - | STY0550 | 100 | STY3334  | 66.99  | STY0550 | 98.2  | STY0997  |
| ATGATAA + | STY0575 | 100 |          |        | STY0575 | 98.9  |          |
| ATGAAAC + | STY0579 | 100 | STY2548  | 61     | STY0579 | 99    | STY2548  |
| ATGGACG - | STY0621 | 100 | STY2582  | 58.416 | STY0621 | 98.4  | STY4447  |
| ATGTCCA - | STY0664 | 100 | STY2723  | 64.486 | STY0664 | 100   | STY2723  |
|           | STY2154 | 60  | STY3364  | 44     | STY2154 | 16.72 | STY3364  |
| ATGAAAA - | STY1911 | 100 | STY2167  | 66     | STY1911 | 98.2  | STY2167  |
| ATGATCC - | STY1447 | 100 | STY4313  | 66.019 | STY1447 | 97.5  | STY4313  |
| ATGAAAA + | STY1444 | 100 |          |        | STY1444 | 98.2  |          |
| ATGACTA + | STY1415 | 99  |          |        | STY1415 | 72.81 |          |
| ATGAGAT + | STY1382 | 100 | STY1226  | 85     | STY1382 | 98.7  | STY1226  |
| ATGTCTC + | STY0544 | 100 | STY0746  | 74     | STY0544 | 98.7  | STY4235  |
| ATGACAA + | STY1538 | 100 | STY0428  | 87     | STY1538 | 98.8  | STY0428  |
| ATGAGTT + | STY1503 | 100 | STY4793  | 70.588 | STY1503 | 98.4  | STY4793  |
|           | STY1553 | 77  | STY3307  | 74     | STY3307 | 47.82 | STY1553  |
| ATGAAGG + | STY0474 | 100 | STY4050  | 50.98  | STY0474 | 99.2  | STY4050  |
| ATGGCAA - | STY4229 | 100 | STY1587  | 77     | STY4229 | 98.3  | STY1587  |
| ATGGGCA + | STY3834 | 100 | STY3833  | 99     | STY3834 | 57.46 | STY3833  |
| ATGAAAT - | STY4123 | 100 |          |        | STY4123 | 98.3  |          |
| ATGGCAG - | STY4062 | 100 | STY3486  | 62.136 | STY4062 | 98.5  | STY3486  |
| ATGAGAT + | STY4054 | 100 | STY2960  | 64     | STY4054 | 97.53 | STY0005  |
| ATGAAAC + | STY3117 | 100 | STY3798  | 74     | STY3117 | 98.7  | STY3798  |
|           | STY4601 | 99  | STY2882  | 92     | STY4601 | 89.4  | STY2882  |
| ATGCGCA - | STY0430 | 100 | STY1935  | 52.427 | STY0430 | 94.85 | STY1935  |
| ATGTTTA - | STY3309 | 100 | STY2128  | 63.107 | STY3309 | 99    | STY2128  |
| ATGATGG + | STY4202 | 100 |          |        | STY4202 | 81.53 |          |
| ATGATGA + | STY4100 | 100 | STY3156  | 62.745 | STY4100 | 99.3  | STY4268  |
| ATGCAGG + | STY3998 | 100 | STY1249  | 61.386 | STY3998 | 79.33 | STY1249  |
| ATGCGTC + | STY2875 | 100 | STY1150  | 75     | STY2875 | 98.4  | STY1150  |
| ATGGATA - | STY0061 | 100 | STY0062  | 78     | STY0061 | 88.83 | STY0675  |
| ATGGACT - | STY0462 | 100 | STY2232  | 57     | STY0462 | 99.7  | STY2232  |
| ATGGCTA + | STY3338 | 100 | STY0276  | 70.093 | STY3338 | 98.7  | STY0276  |
| ATGCTGA - | STY2387 | 100 | HCM2.007 | 55.357 | STY2387 | 99.4  | HCM2.007 |
| ATGTTTT - | STY0934 | 100 |          |        | STY0934 | 98.8  |          |
| ATGTCGA - | STY4152 | 100 |          |        | STY4152 | 99.3  |          |
| ATGTCCT + | STY4698 | 100 | STY2709  | 55     | STY4698 | 99.7  | STY2709  |

|           |         |        |          |                |               |
|-----------|---------|--------|----------|----------------|---------------|
| ATGCGTA + | STY4778 | 100    |          | STY4778        | 99.2          |
| ATGATTC + | STY4360 | 100    | STY1825  | 47.059 STY4360 | 100 STY1825   |
| ATGATGA + | STY4714 | 100    | STY0997  | 65.385 STY4714 | 99.4 STY0997  |
| ATGGCGA + | STY3466 | 99     | STY0361  | 61.765 STY3466 | 88.8 STY1467  |
| ATGAAAG - | STY3379 | 100    | STY3231  | 63.462 STY3379 | 99.1 STY2695  |
| ATGAATA - | STY3297 | 100    | STY3979  | 60.784 STY3297 | 99.7 STY2513  |
| ATGAAGG - | STY2942 | 100    | STY1589  | 68.627 STY2942 | 98.1 STY1589  |
| TTGACCT + | STY4929 | 100    | STY4775  | 60 STY4929     | 94.72 STY4775 |
| ATGTTTA + | STY0408 | 100    | STY1309  | 65.049 STY0408 | 98.5 STY1309  |
| GTGACCA + | STY2448 | 100    | STY4888  | 64 STY2448     | 89.55 STY4888 |
| ATGATTG - | STY2301 | 100    | STY4640  | 64.078 STY2301 | 99.4 STY4640  |
| ATGCTAA - | STY2379 | 100    | STY3920  | 89 STY2379     | 99.8 STY3920  |
| GTGAAAA - | STY1965 | 100    | STY0142  | 80 STY1965     | 98.9 STY0142  |
|           | STY3268 | 100    | STY2657  | 80 STY3268     | 95.45 STY2657 |
| ATGAAAC + | STY3220 | 100    | STY0175  | 65.347 STY3220 | 98.4 STY0134  |
| ATGAGCA + | STY0796 | 100    | STY1683  | 74.257 STY0796 | 99.1 STY1683  |
| ATGTCTT + | STY0855 | 100    | STY1410  | 74 STY0855     | 99 STY2836    |
| ATGAAAA - | STY3199 | 100    |          | STY3199        | 99.6          |
| ATGATCA + | STY1218 | 100    | STY0744  | 63.725 STY1218 | 99.2 STY1216  |
| ATGAAAC - | STY0825 | 100    | STY1104  | 69 STY0825     | 99.4 STY1104  |
|           | STY1791 | 56.436 |          | STY1791        | 13.34         |
| ATGAGTA + | STY3496 | 100    | STY2547  | 60.194 STY3496 | 99.7 STY2547  |
| ATGGAGC + | STY4022 | 100    | STY0538  | 92 STY4022     | 98.6 STY0538  |
| ATGAATA + | STY3254 | 100    | STY2523  | 67.327 STY3254 | 99.5 STY2523  |
| TTGATCA - | STY2155 | 100    | STY3876  | 60.952 STY2155 | 99.5 STY2281  |
| ATGTTGT + | STY3510 | 100    | STY0716  | 67 STY3510     | 97.9 STY0716  |
| GTGATCT + | STY3436 | 100    | STY1739  | 62.376 STY3436 | 95.43 STY2441 |
| ATGCCGC + | STY3390 | 100    | STY3049  | 68 STY3390     | 98.4 STY3049  |
| ATGAAAA - | STY1721 | 100    | STY3094  | 63.107 STY1721 | 98.1 STY0033  |
|           | STY2444 | 57.282 | STY0277  | 53 STY0277     | 16.89 STY2444 |
| ATGTTAG + | STY0786 | 100    | STY1919  | 86 STY0786     | 99.1 STY1919  |
| ATGCCAA - | STY2994 | 100    | STY0442  | 59.406 STY2994 | 97.9 STY3658  |
| ATGAATT - | STY2920 | 100    | HCM1.178 | 72 STY2920     | 99.5 HCM1.178 |
| ATGGCTA + | STY4067 | 99     | STY2063  | 62.037 STY4067 | 99.4 STY2063  |
| ATGGTAA - | STY2863 | 100    |          | STY2863        | 100           |
| ATGGCGA - | STY0587 | 100    | STY2349  | 58 STY0587     | 99.5 STY2349  |
| ATGAGCC + | STY1345 | 100    | STY1137  | 83 STY1345     | 99.7 STY1137  |
|           | STY3345 | 60.748 | STY2743  | 58.929 STY2743 | 45.37 STY3345 |
| ATGAAAA + | STY2174 | 100    | STY3233  | 90 STY2174     | 97.9 STY4537  |
| ATGTCGC + | STY1473 | 100    |          | STY1473        | 99.1          |
| TTGATTA + | STY3615 | 100    | STY1205  | 74 STY3615     | 88.95 STY1205 |
| ATGGCAA + | STY3647 | 100    | STY2807  | 61.765 STY3647 | 99.6 STY2329  |
| ATGACCA + | STY0982 | 100    | STY4341  | 60.55 STY0982  | 100 STY3715   |
|           | STY3064 | 85     | STY3380  | 55.66 STY3064  | 75.73 STY3380 |
| ATGAGCC - | STY4121 | 100    | STY4742  | 66 STY4121     | 97.8 STY4742  |
|           | STY1760 | 83     | STY0219  | 63.107 STY1760 | 72.9 STY2089  |
|           | STY0088 | 76     | STY3082  | 57 STY0088     | 64.96 STY3082 |
|           | STY3614 | 99     | STY4870  | 62.5 STY3614   | 44.79 STY4870 |
| ATGGTTA + | STY4696 | 100    | STY0629  | 60.784 STY4696 | 100 STY0629   |
| ATGACTA + | STY4948 | 100    | STY3614  | 54.286 STY4948 | 100 STY3614   |
| ATGAACC + | STY0001 | 100    | STY4430  | 60.606 STY0001 | 100 STY4430   |



|           |           |        |          |        |           |       |          |
|-----------|-----------|--------|----------|--------|-----------|-------|----------|
|           | STY0358   | 56.075 | STY1738  | 50     | STY0358   | 40.52 | STY1738  |
|           | STY4178   | 68.889 | STY0395  | 57.778 | STY4178   | 68.9  | STY0395  |
|           | STY0531   | 40     | STY0580  | 40     | STY0531   | 36.72 | STY0580  |
| ATGAACA - | STY3376   | 99     | STY3971  | 59.406 | STY3376   | 95.69 | STY1159  |
| ATGTACG - | STY3471   | 100    | STY3810  | 60     | STY3471   | 99.1  | STY4466  |
| ATGCGCA + | STY0906   | 100    | STY4105  | 75.728 | STY0906   | 98.6  | STY4105  |
|           | STY0970   | 93     | STY1201  | 64.151 | STY0970   | 56.55 | STY4645  |
|           | STY1012   | 65     | STY3762  | 63.107 | STY1012   | 45.67 | STY1292  |
| GTGTCTG + | STY0759   | 100    |          |        | STY0759   | 92.33 |          |
|           | HCM1.2271 | 64.078 | STY0511  | 60.784 | HCM1.2271 | 43.15 | STY0511  |
|           | STY0214   | 62.376 | STY4230  | 62.136 | STY0498   | 18.8  | STY0214  |
|           | STY2517   | 36     |          |        | STY2517   | 7.28  |          |
|           | STY3850   | 64.356 | STY3535  | 60.784 | STY3850   | 14.22 | STY3535  |
|           | STY4494   | 63     | STY1344  | 60.396 | STY4494   | 26.51 | STY4515  |
|           | STY1958   | 100    | STY0045  | 63.462 | STY1958   | 98.3  | STY2332  |
|           | STY0793   | 61.538 |          |        | STY0793   | 6.78  |          |
| ATGAATA + | STY0039   | 100    | STY0046  | 76     | STY0039   | 98.7  | STY0046  |
|           | STY2248   | 100    | STY1349  | 90     | STY2248   | 98.4  | HCM1.159 |
|           | STY2332   | 100    | STY1958  | 60.185 | STY2332   | 99.8  | STY0712  |
|           | STY2446   | 99     | STY3319  | 63.462 | STY2446   | 98.7  | STY3319  |
|           | STY0964   | 100    | STY1568  | 88     | STY0964   | 99.7  | STY1568  |
|           | STY3359   | 100    | STY3943  | 72     | STY3359   | 99.5  | STY3943  |
|           | STY3422   | 100    | STY1956  | 77.451 | STY3422   | 98.2  | STY3110  |
|           | STY3511   | 100    | STY2717  | 80     | STY3511   | 98.8  | STY2717  |
|           | STY0121   | 62.5   |          |        | STY0121   | 12.31 |          |
| ATGTTAT - | STY3189   | 100    | STY4870  | 64     | STY3189   | 100   | STY1160  |
| ATGAATA - | STY2069   | 100    | STY4075  | 88.119 | STY2069   | 100   | STY4075  |
| ATGAAAA - | STY2299   | 100    | STY2444  | 65     | STY2299   | 100   | STY2444  |
| GTGGCTC + | STY3686   | 100    | STY4616  | 93     | STY3686   | 100   | STY4616  |
| ATGAGTA - | STY3064   | 100    | STY0132  | 55.238 | STY3064   | 100   | STY0132  |
| ATGAAAA - | STY0207   | 100    | STY0924  | 63.81  | STY0207   | 100   | STY1277  |
| TTGCAGG - | STY3345   | 100    | STY4117  | 59     | STY3345   | 100   | STY3344  |
| ATGGCAA + | STY3664   | 100    | STY4640  | 89     | STY3664   | 100   | STY4640  |
| ATGAAAG + | STY3680   | 100    | STY4622  | 97     | STY3680   | 100   | STY4622  |
| ATGGCTT - | STY2887   | 100    | STY3697  | 100    | STY2887   | 100   | STY3697  |
| ATGCTTT - | STY0201   | 100    | STY1460  | 66.337 | STY0201   | 100   | STY1460  |
| ATGCCCC + | STY0314   | 100    | STY0312  | 92     | STY0314   | 100   | STY0312  |
| ATGGCTG + | STY3666   | 100    | STY4638  | 91     | STY3666   | 100   | STY4638  |
| GTGCTGC + | STY3682   | 100    | STY4620  | 90     | STY3682   | 100   | STY4620  |
| ATGGGGC + | STY3706   | 100    | STY3224  | 98     | STY3706   | 100   | STY0437  |
| TTGGGTA + | STY4075   | 100    | STY4824  | 62.376 | STY4075   | 100   | STY4032  |
| ATGACGA - | STY1593   | 100    | STY3895  | 58.252 | STY1593   | 100   | STY3895  |
| ATGACAT + | STY1610   | 100    | HCM1.159 | 64.078 | STY1610   | 100   | STY3443  |
| ATGCATT - | STY2750   | 100    | STY3710  | 60     | STY2750   | 100   | STY3710  |
| ATGAAAA + | STY2906   | 100    | STY3422  | 61.905 | STY2906   | 100   | STY3422  |
|           | STY4108   | 100    | STY1295  | 37     | STY4108   | 100   | STY1295  |
|           | STY4638   | 100    | STY3666  | 91     | STY4638   | 100   | STY3666  |
| ATGATCT + | STY4668   | 100    | STY4518  | 93     | STY4668   | 100   | STY4518  |
| ATGAAGC + | STY4821   | 100    | STY4680  | 73     | STY4821   | 100   | STY4680  |
| ATGACAG + | STY4549   | 100    | STY2392  | 89     | STY4549   | 100   | STY3562  |

|          |         |     |         |        |         |     |          |
|----------|---------|-----|---------|--------|---------|-----|----------|
| ATGGCGA+ | STY4569 | 100 | STY0244 | 70.588 | STY4569 | 100 | STY0244  |
| ATGACTA- | STY4850 | 100 | STY2932 | 67.961 | STY4850 | 100 | HCM1.182 |
| ATGAAAA- | STY4619 | 100 | STY3683 | 65.385 | STY4619 | 100 | STY3683  |
| TTGCTCA+ | STY4648 | 100 | STY4857 | 89     | STY4648 | 100 | STY4857  |
| ATGTTCC+ | STY4665 | 100 |         |        | STY4665 | 100 |          |

|          |         |        |          |        |         |       |          |
|----------|---------|--------|----------|--------|---------|-------|----------|
| ATGAACG- | STY0744 | 100    | STY0433  | 79     | STY0744 | 72.56 | STY2343  |
| ATGATGA- | STY3945 | 100    | STY2500  | 76     | STY3945 | 95.8  | STY2500  |
| ATGGCTG+ | STY3927 | 100    | STY0641  | 65.347 | STY3927 | 98.9  | STY4890  |
| ATGCCTT+ | STY3888 | 100    | STY1934  | 60.396 | STY3888 | 99.3  | STY4862  |
| ATGACCC+ | STY1904 | 100    | STY4279  | 62.136 | STY1904 | 98.4  | STY4279  |
| ATGGCCA- | STY0130 | 100    | STY1339  | 61.386 | STY0130 | 98    | STY1339  |
| ATGAGTT- | STY0050 | 100    | STY0762  | 48.077 | STY0050 | 98.1  | STY0762  |
| ATGTTCC+ | STY0139 | 100    |          |        | STY0139 | 99.6  |          |
| ATGGACA- | STY0173 | 100    | STY0617  | 79     | STY0173 | 99.38 | STY0617  |
|          | STY4943 | 76     | STY1419  | 64.865 | STY0032 | 48.23 | STY0592  |
|          | HCM1.97 | 57.692 | STY1519  | 38     | HCM1.97 | 7.11  | STY1519  |
| ATGCTGA- | STY0263 | 100    | STY0996  | 58     | STY0263 | 100   | STY0996  |
| ATGCAAA- | STY3526 | 100    | STY2528  | 64.545 | STY3526 | 98.4  | STY4917  |
| ATGGACG+ | STY3561 | 99     | STY2903  | 63.366 | STY3561 | 98.8  | STY2903  |
| GTGCGAT- | STY0698 | 100    |          |        | STY0698 | 99.7  |          |
| ATGACAA+ | STY0717 | 100    | STY3212  | 73     | STY0717 | 98.72 | STY3212  |
| ATGAGTA- | STY0738 | 100    | STY2805  | 64.356 | STY0738 | 99.1  | STY4493  |
| ATGACCT+ | STY2170 | 100    | STY0220  | 48     | STY2170 | 98.9  | STY4910  |
| ATGAATA+ | STY1831 | 100    | STY1265  | 61.165 | STY1831 | 99    | STY1265  |
| ATGACAA- | STY2328 | 100    | STY4509  | 64     | STY2328 | 82.09 | STY4509  |
| ATGAAGT- | STY4623 | 100    | STY3679  | 95     | STY4623 | 99.1  | STY3679  |
|          | STY2953 | 61     | STY1797  | 59.223 | STY2953 | 48.09 | STY1797  |
|          | STY4631 | 55.882 |          |        | STY4631 | 17.11 |          |
| ATGAATA+ | STY2912 | 100    | STY4328  | 66.337 | STY2912 | 99    | STY0826  |
| ATGAAAA- | STY4946 | 100    | STY1183  | 58     | STY4946 | 98.4  | STY1183  |
|          | STY2295 | 63.107 | STY2350  | 56.311 | STY2295 | 15.4  | STY2350  |
|          | STY4676 | 76     | STY4586  | 59     | STY4676 | 53.39 | STY4586  |
| ATGACAC+ | STY1078 | 100    | STY4281  | 61.386 | STY1078 | 99.2  | STY4281  |
| ATGACCA+ | STY1569 | 100    | STY4509  | 60.952 | STY1569 | 98    | STY4509  |
| ATGTCCA+ | STY4346 | 100    | STY2844  | 50     | STY4346 | 99.2  | STY2844  |
| GTGGCG/- | STY1081 | 100    | STY4406  | 55.882 | STY1081 | 98.3  | STY4406  |
| ATGGTAT+ | STY1666 | 100    | STY3368  | 77.451 | STY1666 | 98.7  | STY3368  |
| ATGCGTT+ | STY4377 | 100    | STY0419  | 62.136 | STY4377 | 100   | STY0064  |
| ATGTGGC- | STY4329 | 100    | STY1095  | 63.462 | STY4329 | 99.2  | STY1095  |
| ATGCGCC- | STY4296 | 100    | STY3305  | 53.465 | STY4296 | 98.9  | STY3305  |
| ATGACTG- | STY1856 | 100    | HCM1.255 | 58.824 | STY1856 | 98.3  | HCM1.255 |
| GTGACGC- | STY1164 | 100    | STY1165  | 100    | STY1164 | 56.8  | STY1165  |
| ATGAAAA+ | STY1238 | 100    | STY2448  | 63.393 | STY1238 | 98.3  | STY2448  |
| ATGAATA+ | STY1258 | 100    | STY0938  | 73     | STY1258 | 98.9  | STY4241  |
| TTGAGCA+ | STY4269 | 100    | STY3196  | 68.269 | STY4269 | 98.7  | STY0372  |
|          | STY3590 | 57     |          |        | STY3590 | 19.55 |          |

|           |         |        |          |        |         |       |         |
|-----------|---------|--------|----------|--------|---------|-------|---------|
|           | STY1635 | 79     | STY4425  | 71     | STY1635 | 40.3  | STY4425 |
| ATGACTG + | STY3814 | 100    | STY0773  | 63.462 | STY3814 | 96.5  | STY0773 |
| ATGACTG + | STY3780 | 100    |          |        | STY3780 | 98.9  |         |
| ATGACCC + | STY3745 | 100    |          |        | STY3745 | 99.3  |         |
| ATGGAAT + | STY3030 | 100    | STY1984  | 67.647 | STY3030 | 98.65 | STY1984 |
| ATGTTGA - | STY4697 | 100    | STY3731  | 87     | STY4697 | 98.6  | STY0213 |
| ATGGTCA + | STY2623 | 100    | STY2941  | 64     | STY2623 | 99.4  | STY3762 |
| ATGAGTA - | STY0924 | 100    | STY0707  | 79     | STY0924 | 99.6  | STY2159 |
| ATGGATG - | STY2709 | 100    | STY2702  | 62.745 | STY2709 | 99.3  | STY2702 |
| ATGTTCA + | STY2735 | 100    | STY1793  | 72     | STY2735 | 99    | STY1793 |
| TTGGCGT - | STY2797 | 100    | STY3211  | 63.725 | STY2797 | 92.43 | STY0964 |
| TTGGCGT - | STY3805 | 100    | STY3806  | 100    | STY3806 | 72.5  | STY0171 |
| TTGAGCG + | STY3771 | 100    | STY3579  | 79     | STY3771 | 96.51 | STY3579 |
|           | STY1047 | 62.385 | HCM1.241 | 61     | STY0762 | 37.2  | STY1047 |
| ATGGTAA - | STY3051 | 100    |          |        | STY3051 | 98.6  |         |
| ATGACAA - | STY3082 | 100    |          |        | STY3082 | 99.5  |         |
|           | STY4804 | 61.468 |          |        | STY4804 | 7.18  |         |
|           | STY0605 | 61.905 | STY2032  | 51.485 | STY0605 | 5.23  | STY2032 |
| ATGACTC + | STY1803 | 100    | STY0697  | 65.347 | STY1803 | 99    | STY0697 |
| ATGAATA + | STY1685 | 100    | STY0419  | 61.538 | STY1685 | 99.5  | STY0419 |
| ATGAAAA + | STY2192 | 100    | STY0101  | 61.682 | STY2192 | 96.2  | STY1531 |
| ATGAAAT + | STY2514 | 100    | STY0260  | 55     | STY2514 | 98.9  | STY0260 |
| ATGTTTC - | STY4855 | 100    | STY3288  | 57.426 | STY4855 | 98.6  | STY2107 |
|           | STY4875 | 100    | STY4020  | 77     | STY4875 | 54.09 | STY4020 |
| ATGTATC + | STY1173 | 100    | STY4048  | 62.136 | STY1173 | 99.9  | STY0551 |
| ATGGATG - | STY1818 | 100    | STY3144  | 60.577 | STY1818 | 98.2  | STY2664 |
| ATGAAAT - | STY1676 | 100    | STY4868  | 62.376 | STY1676 | 98.8  | STY4868 |
| ATGTCCC + | STY1652 | 100    | STY4601  | 62.5   | STY1652 | 98.4  | STY4601 |
| ATGGGAC - | STY1646 | 100    | HCM1.67  | 58.491 | STY1646 | 99.1  | HCM1.67 |
| ATGTCAC - | STY1191 | 100    | STY0414  | 75     | STY1191 | 99    | STY0414 |
| ATGTTCT + | STY2986 | 100    | STY2985  | 66     | STY2986 | 98.5  | STY2985 |
| ATGAACA + | STY1669 | 100    | STY4690  | 58.416 | STY1669 | 98.4  | STY4690 |
| ATGCGTT + | STY2198 | 100    | STY4489  | 57.282 | STY2198 | 98.3  | STY4489 |
| ATGAGTC + | STY2283 | 100    | STY0026  | 65     | STY2283 | 99.1  | STY0275 |
| ATGCGGT - | STY1816 | 100    | STY4530  | 74     | STY1816 | 98.9  | STY4530 |
| TTGGAAT - | STY1678 | 100    | STY1762  | 62.264 | STY1678 | 97.55 | STY2836 |
| ATGAGCA - | STY1689 | 100    | STY4818  | 63     | STY1689 | 99.4  | STY4818 |
| ATGAAAA + | STY1656 | 100    | STY3121  | 75.238 | STY1656 | 99    | STY0466 |
| ATGAAGA - | STY1705 | 100    | STY3017  | 71     | STY1705 | 98.2  | STY2180 |
| ATGGCAG + | STY3903 | 100    | STY0144  | 59.804 | STY3903 | 93.48 | STY0144 |
| ATGAATG + | STY4000 | 100    | STY3443  | 65     | STY4000 | 98.8  | STY1450 |
| ATGGCTG - | STY2824 | 100    | STY2849  | 90     | STY2824 | 99.2  | STY4085 |
| GTGCTGC + | STY0433 | 100    | STY2343  | 65     | STY0433 | 99    | STY2343 |
| ATGAATC + | STY4401 | 100    | STY2283  | 61.165 | STY4401 | 98.42 | STY2283 |
| ATGAGCT - | STY0079 | 100    | STY4398  | 60.784 | STY0079 | 98.8  | STY4398 |
| ATGTCAA + | STY1789 | 100    | STY2946  | 60.784 | STY1789 | 98.66 | STY2946 |
| ATGAATA - | STY1781 | 100    | STY2948  | 54.455 | STY1781 | 97.29 | STY2948 |
| ATGATAC + | STY2189 | 100    | STY4426  | 58.491 | STY2189 | 99.1  | STY0467 |
| TTGATGG - | STY1660 | 100    | STY4266  | 72     | STY1660 | 99    | STY4266 |

|           |         |        |          |        |         |       |          |
|-----------|---------|--------|----------|--------|---------|-------|----------|
| ATGCTGA - | STY1575 | 100    | STY1574  | 63     | STY1575 | 98.4  | STY1772  |
| ATGCATC + | STY2602 | 100    | STY0848  | 65.686 | STY2602 | 99.5  | STY0554  |
| ATGAAAA - | STY2819 | 100    | STY3460  | 61.765 | STY2819 | 99.8  | STY3460  |
|           | STY2651 | 58.095 |          |        | STY2651 | 8.92  |          |
| ATGCTTA + | STY3358 | 100    |          |        | STY3358 | 98.7  |          |
| ATGATTC + | STY4241 | 100    | STY0467  | 72.549 | STY4241 | 99.3  | STY1258  |
| ATGAATA + | STY4314 | 100    | STY1150  | 60.396 | STY4314 | 97.2  | STY0823  |
| ATGAAAA + | STY0380 | 100    | HCM1.271 | 59.406 | STY0380 | 98.7  | STY0872  |
| ATGTTTA + | STY1739 | 100    | STY4264  | 70     | STY1739 | 98    | STY4264  |
| ATGAAAC + | STY0509 | 100    | STY0294  | 52.475 | STY0509 | 98.8  | STY0294  |
| ATGTTGA - | STY0607 | 100    | STY2627a | 96     | STY0607 | 99.7  | STY2627a |
| ATGAGCT - | STY4773 | 100    | STY2426  | 61.321 | STY4773 | 99.6  | STY2426  |
| ATGGATA - | STY4890 | 100    | STY0644  | 89     | STY4890 | 98.6  | STY0644  |
| ATGGTGA - | STY3367 | 100    | HCM1.234 | 59     | STY3367 | 98.5  | HCM1.234 |
| ATGAGCT + | STY3397 | 100    | STY3511  | 60.784 | STY3397 | 98.7  | STY2936  |
| ATGACCT + | STY3401 | 99     |          |        | STY3401 | 98    |          |
| ATGGCGC + | STY4305 | 100    | STY3176  | 63.725 | STY4305 | 98.7  | STY1491  |
| GTGTCCC + | STY2568 | 100    | STY2702  | 66     | STY2568 | 99.1  | STY2702  |
| ATGATGC + | STY2800 | 100    |          |        | STY2800 | 99.3  |          |
| ATGATCC + | STY0577 | 100    | STY4341  | 56     | STY0577 | 98.6  | STY4341  |
| ATGAAAA - | STY0576 | 100    | STY1459  | 61     | STY0576 | 99    | STY1459  |
| ATGAATG + | STY3033 | 100    | STY1159  | 63.366 | STY3033 | 99.1  | STY0144  |
| ATGCGCA - | STY3811 | 100    | STY1959  | 60.194 | STY3811 | 99.6  | STY1959  |
| ATGTACG + | STY0708 | 100    | STY2160  | 79     | STY0708 | 99    | STY0867  |
| ATGTCAG - | STY4391 | 100    |          |        | STY4391 | 99.2  |          |
| ATGGCGA - | STY2828 | 100    |          |        | STY2828 | 98.9  |          |
| ATGTTAA + | STY2287 | 100    | STY0878  | 50     | STY2287 | 99.3  | STY0878  |
| GTGATCG - | STY3871 | 100    | STY3739  | 64.706 | STY3871 | 99.2  | STY4353  |
| ATGAGCA + | STY0912 | 100    | STY1265  | 68.317 | STY0912 | 98.5  | STY1265  |
| ATGAGTT - | STY4387 | 100    |          |        | STY4387 | 99.3  |          |
|           | STY1366 | 77     | STY2889  | 76     | STY2889 | 61.8  | STY3695  |
| ATGCGTA + | STY1223 | 100    | STY2529  | 63.462 | STY1223 | 99.3  | STY2529  |
| ATGAGCA - | STY2826 | 100    | STY3937  | 64.423 | STY2826 | 98.8  | STY3937  |
| ATGAAAA + | STY4189 | 100    | STY4482  | 68.932 | STY4189 | 98.9  | STY4482  |
| ATGTTAA - | STY2802 | 100    | STY3764  | 76     | STY2802 | 99.2  | STY3764  |
| ATGGGAA + | STY1159 | 100    | STY2911  | 81     | STY1159 | 99.1  | STY1467  |
| ATGCAAA + | STY1655 | 100    |          |        | STY1655 | 99.4  |          |
| ATGAGTA - | STY0900 | 100    | STY0881  | 72.277 | STY0900 | 98    | STY0881  |
| ATGAATC + | STY0877 | 100    | STY3619  | 65     | STY0877 | 99.4  | STY3619  |
| ATGAAGT + | STY1993 | 99     | STY0688  | 59     | STY1993 | 95.96 | STY0688  |
| ATGAACG + | STY2403 | 100    | STY2988  | 93.137 | STY2403 | 100   | STY2988  |
| ATGGAAA + | STY0767 | 100    | STY0632  | 63     | STY0767 | 98.9  | STY1362  |
| ATGAAAC - | STY4502 | 100    | STY2753  | 63.107 | STY4502 | 98.8  | STY0674  |
| ATGAAAA - | STY2146 | 100    | STY0156  | 62     | STY2146 | 99.4  | STY0156  |
| ATGAGGC + | STY1384 | 100    | STY1304  | 77     | STY1384 | 98.9  | STY1304  |
| ATGAGTG + | STY1373 | 100    | STY0526  | 59.615 | STY1373 | 99.2  | STY0526  |
| ATGGATA + | STY4460 | 100    | STY0954  | 61.386 | STY4460 | 98.8  | STY0955  |
| ATGTCTA + | STY0057 | 100    | STY3153  | 60.952 | STY0057 | 100   | STY3308  |
| ATGAAAA - | STY1039 | 100    | STY1186  | 57.407 | STY1039 | 99.6  | STY1186  |
| ATGTCCA + | STY1420 | 100    | STY0635  | 53.922 | STY1420 | 100   | STY0635  |
| ATGAATT + | STY3859 | 100    | STY0049  | 63.107 | STY3859 | 98.3  | STY0049  |
| ATGAAGG + | STY4244 | 100    | STY4248  | 87     | STY4244 | 97.23 | STY4248  |

|            |          |        |          |        |          |       |          |
|------------|----------|--------|----------|--------|----------|-------|----------|
| ATGCAGC +  | STY3669  | 99     | STY4633  | 92     | STY3669  | 89.9  | STY4633  |
|            | STY0321  | 100    | STY0324  | 72.549 | STY0321  | 90.1  | STY0324  |
| ATGATCG +  | STY2674  | 100    |          |        | STY2674  | 98.4  |          |
| ATGATCT, + | STY2111  | 100    |          |        | STY2111  | 99    |          |
| ATGAATA, + | STY4457  | 100    |          |        | STY4457  | 98.4  |          |
| ATGAAAG -  | STY3164  | 100    | STY3578  | 69.903 | STY3164  | 96.64 | STY3578  |
| ATGCCGC +  | STY3388  | 100    | STY4490  | 57.843 | STY3388  | 100   | STY4490  |
| ATGCATT, + | STY3000  | 100    | STY4548  | 64     | STY3000  | 98.8  | STY4548  |
| ATGTCCA -  | STY3591  | 100    | STY0554  | 64.706 | STY3591  | 99    | STY3644  |
| GTGTCAC +  | STY3940  | 100    | STY4896  | 59.223 | STY3940  | 98.73 | STY4896  |
| ATGACGC -  | STY3219  | 100    | STY4223  | 60.952 | STY3219  | 99.4  | STY4223  |
| ATGACCA -  | STY3626  | 100    |          |        | STY3626  | 97.7  |          |
| ATGAACG +  | STY3253  | 100    | STY3472  | 71     | STY3253  | 99.01 | STY3472  |
| ATGTCTA -  | STY3733  | 100    | STY3777  | 53     | STY3733  | 99.7  | STY0176  |
| ATGAAAC +  | STY0589  | 99     | STY0024  | 76     | STY0589  | 97.3  | STY3918  |
| ATGGCGC -  | STY2125  | 100    | STY2496  | 65.686 | STY2125  | 99.2  | STY3812  |
| ATGTCTG -  | STY3877  | 100    | STY4856  | 61.538 | STY3877  | 99.2  | STY3257  |
| ATGGCTG +  | STY3158  | 100    | STY0134  | 60.396 | STY3158  | 99.3  | STY3649  |
| ATGAGCA +  | STY3869  | 100    | STY0593  | 60.194 | STY3869  | 98.1  | STY0593  |
| ATGCAAT -  | STY3612  | 100    | STY0146  | 62.376 | STY3612  | 99.14 | STY4484  |
| ATGTCAC +  | STY3657  | 100    | STY3095  | 63.551 | STY3657  | 86.79 | STY3095  |
|            | STY2167  | 100    | STY4443  | 51.961 | STY2167  | 55.23 | STY4443  |
| ATGTCCC -  | STY3074  | 100    | STY3721  | 61     | STY3074  | 96.3  | STY3721  |
| ATGAAAG -  | STY1493  | 100    | STY2250  | 63.107 | STY1493  | 99.2  | STY4087  |
| ATGATCA -  | STY1454  | 100    | STY4732  | 61.111 | STY1454  | 98    | STY4732  |
| ATGAAGG +  | STY1423  | 100    | STY4924  | 76.238 | STY1423  | 98.6  | STY4924  |
| ATGAAAA -  | STY1393  | 100    | STY1829  | 62.385 | STY1393  | 98.11 | STY2510  |
| ATGAAAG +  | STY1520  | 100    | STY1758  | 64.151 | STY1520  | 98.2  | STY1555  |
| ATGACCG +  | STY1551  | 100    | STY0617  | 60     | STY1551  | 99.3  | STY0617  |
| ATGAGCC -  | STY1004  | 100    | STY3210  | 60.577 | STY1004  | 99.4  | STY3210  |
| ATGACCG -  | STY0634  | 100    | STY0219  | 78.431 | STY0634  | 98    | STY0219  |
| ATGAAAA -  | STY0372  | 100    | STY0206  | 81.553 | STY0372  | 97.9  | STY0206  |
| GTGTCAC +  | STY1310  | 100    |          |        | STY1310  | 99    |          |
| ATGAAGC +  | STY1476  | 100    | HCM1.255 | 62     | STY1476  | 95.76 | HCM1.255 |
| ATGTCGT -  | STY1964  | 100    | STY3344  | 64.356 | STY1964  | 98.8  | STY3344  |
|            | STY0321  | 52     |          |        | STY0321  | 12.94 |          |
| ATGAAAA -  | STYkdgA  | 100    | STY0185  | 66     | STYkdgA  | 99.2  | STY0185  |
| ATGGCAG +  | STY2141  | 100    | STY2143  | 70     | STY2141  | 99    | STY2143  |
| ATGAAAC +  | STYglxA2 | 100    |          |        | STYglxA2 | 99    |          |
| ATGTTAA, + | STY0585  | 100    | STY2384  | 68     | STY0585  | 99.2  | STY2491  |
|            | STY4202  | 66.337 | STY4786  | 60.377 | STY4202  | 18.5  | STY0736  |
| GTGCGTA +  | STY0426  | 100    | STY1260  | 62     | STY0426  | 98.7  | STY1260  |
| ATGACTG -  | STY3321  | 100    | STY1523  | 65.049 | STY3321  | 99.4  | STY1523  |
| ATGTTCA -  | STY2952  | 100    | STY4132  | 66.99  | STY2952  | 99    | STY1626  |
| GTGGCAC +  | STY4165  | 100    | STY0231  | 60.784 | STY4165  | 99    | STY0231  |
| ATGGCTG +  | STY4865  | 99     | STY3300  | 70     | STY4865  | 98    | STY3300  |
| ATGAAAA -  | STY2632  | 100    | STY4111  | 64.423 | STY2632  | 98.2  | STY4111  |
| ATGGGTT -  | STY4021  | 100    | STY2693  | 56     | STY4021  | 99.1  | STY2693  |
| ATGATAA, + | STY3130  | 100    |          |        | STY3130  | 99.2  |          |
| ATGACAG -  | STY3174  | 100    |          |        | STY3174  | 97.6  |          |
| GTGGTTC -  | STY3258  | 100    | STY0494  | 61.538 | STY3258  | 99.1  | STY0494  |
| ATGAGTC -  | STY0508  | 100    | STY3942  | 60.377 | STY0508  | 99.1  | STY3942  |

|           |         |        |          |        |         |       |          |
|-----------|---------|--------|----------|--------|---------|-------|----------|
| ATGCCGC - | STY2926 | 100    | STY3762  | 66.019 | STY2926 | 99    | STY3762  |
| ATGCAAA - | STY4069 | 100    | STY3717  | 64.706 | STY4069 | 98.5  | STY3717  |
| ATGCTCG + | STY3111 | 100    | HCM1.226 | 62.136 | STY3111 | 98.9  | STY3881  |
| GTGGACC - | STY3163 | 100    | STY0585  | 62.136 | STY3163 | 99.4  | STY0585  |
|           | STY0576 | 64.706 | STY3795  | 61.905 | STY0576 | 51.16 | STY3795  |
| ATGAATA - | STY3294 | 100    | STY4165  | 57.843 | STY3294 | 92.3  | STY4165  |
| ATGGCTA - | STY2950 | 100    | HCM2.000 | 82.353 | STY2950 | 98.8  | HCM2.000 |
| ATGTTTA - | STY2330 | 100    | STY0955  | 57     | STY2330 | 97.8  | STY0955  |
|           | STY2469 | 100    | STY4611  | 81     | STY2469 | 66.53 | STY4611  |
| ATGCGAG - | STY4083 | 100    | STY2280  | 64.706 | STY4083 | 98.7  | STY4084  |
| ATGCCAC + | STY4362 | 100    | STY1554  | 59.406 | STY4362 | 100   | STY1775  |
| ATGCAGT - | STY3508 | 100    | STY4235  | 63.725 | STY3508 | 99.5  | STY0544  |
| ATGAACA - | STY3433 | 100    | STY3854  | 63.107 | STY3433 | 99.9  | STY3854  |
| ATGAATA - | STY4211 | 100    | STY1670  | 74     | STY4211 | 99    | STY1670  |
| ATGAAAC - | STY0949 | 100    | STY3387  | 59.223 | STY0949 | 98.7  | STY3387  |
| ATGGAAG + | STY4783 | 100    | STY0747  | 62.963 | STY4783 | 98.9  | STY0747  |
| ATGGCAA + | STY4921 | 100    | STY0077  | 63.208 | STY4921 | 97.6  | STY0077  |
|           | STY2339 | 64     | STY3569  | 57     | STY2339 | 25.56 | STY3569  |
| ATGCGCC - | STY1814 | 99     | STY3549  | 63.107 | STY1814 | 97.8  | STY3549  |
| ATGAATG - | STY4688 | 100    |          |        | STY4688 | 97.65 |          |
| GTGAGTC - | STY2945 | 100    | STY4684  | 58     | STY2945 | 99.8  | STY4684  |
| ATGGAGA - | STY2430 | 100    | STY1956  | 77     | STY2430 | 98.5  | STY1956  |
|           | STY3693 | 80     | HCM1.32c | 59.048 | STY3693 | 59.04 | HCM1.32c |
| ATGAAAA - | STY2380 | 100    | STY0372  | 63.81  | STY2380 | 99.7  | STY0206  |
| ATGACTC - | STY2409 | 100    | STY2458  | 63.107 | STY2409 | 99.8  | STY0387  |
| ATGAATC - | STY1720 | 100    | STY4879  | 61.165 | STY1720 | 96.9  | STY4879  |
| ATGAAAT + | STY1090 | 100    | STY0911  | 65.385 | STY1090 | 99.3  | STY4227  |
|           | STY4867 | 61.765 | STY4573  | 60.784 | STY4867 | 12.87 | STY4573  |
| ATGAATT - | STY0875 | 100    | STY3833  | 68     | STY0875 | 99.3  | HCM1.236 |
| ATGAAAT + | STY1812 | 100    |          |        | STY1812 | 98.5  |          |
| ATGGCCA + | STY3432 | 100    | STY0701  | 64.356 | STY3432 | 99.5  | STY0701  |
| ATGTTTC - | STY0850 | 100    | STY0851  | 64     | STY0850 | 99.2  | STY0851  |
| GTGCAAA - | STY3212 | 100    | STY0717  | 72     | STY3212 | 99.3  | STY0717  |
| ATGAAAG - | STYnml  | 100    | STY3456  | 63.81  | STYnml  | 96.4  | STY1290  |
| ATGAATA + | STY3404 | 100    | STY0644  | 83.168 | STY3404 | 99.1  | STY0644  |
| ATGTTGA + | STY3233 | 100    | STY3232  | 68     | STY3233 | 91.34 | STY2393  |
| ATGAAAC + | STY1129 | 99     | STY2394  | 63.303 | STY1129 | 98.1  | STY2394  |
| ATGGAAA + | STY2996 | 100    | STY4515  | 68     | STY2996 | 99.1  | STY2988  |
| ATGTTAG + | STY4029 | 100    | STY2979  | 58.416 | STY4029 | 98.3  | STY1127  |
| ATGACCT + | STY3341 | 100    | STY0536  | 52     | STY3341 | 98.9  | STY0536  |
| ATGGATA - | STY1714 | 100    | STY1907  | 66     | STY1714 | 100   | STY1907  |
| ATGAGCG + | STY1141 | 100    | STY2520  | 75     | STY1141 | 98.8  | STY2501  |
| ATGTCAT + | STY0811 | 100    | STY0938  | 66.019 | STY0811 | 98.6  | STY4224  |
| ATGGACT + | STY2722 | 100    | STY1593  | 48     | STY2722 | 99.5  | STY1593  |
| ATGGCCT - | STY2785 | 100    | STY0012  | 67     | STY2785 | 99    | STY0012  |
| ATGATTA + | STY2720 | 100    | STY4235  | 64.423 | STY2720 | 99.4  | STY4409  |
| ATGTCGC - | STY0524 | 100    | STY2553  | 61.165 | STY0524 | 100   | STY0981  |
| ATGGGAA - | STY1925 | 100    | STY1846  | 70     | STY1925 | 99.6  | STY1846  |
| ATGGCAC - | STY4411 | 100    | STY4883  | 62     | STY4411 | 98.9  | STY0144  |
| ATGTTTG - | STY4889 | 100    | STY0645  | 76     | STY4889 | 100   | STY0645  |
| ATGGAAC + | STY4278 | 100    | STY3824  | 65     | STY4278 | 95.61 | STY3824  |
| ATGAAGC - | STY4247 | 100    | STY2523  | 64     | STY4247 | 99.5  | STY2376  |

|            |         |        |          |        |         |       |          |
|------------|---------|--------|----------|--------|---------|-------|----------|
| TTGAGAT. - | STY4514 | 100    | STY1661  | 63.81  | STY4514 | 98.6  | STY4452  |
|            | STY1608 | 69     | STY2645  | 48.544 | STY1608 | 38.43 | STY2645  |
| ATGGCTG -  | STY4638 | 100    | STY3666  | 93     | STY4638 | 98.2  | STY3666  |
| ATGCAGC -  | STY4140 | 100    | STY1437  | 59     | STY4140 | 99    | STY1437  |
|            | STY0711 | 55.34  |          |        | STY0711 | 8.23  |          |
| ATGACAC +  | STY0363 | 100    | HCM2.009 | 62     | STY0363 | 99.3  | HCM2.009 |
| ATGAAAC +  | STY0004 | 100    | STY1930  | 64.078 | STY0004 | 97.47 | STY2740  |
| TTGAATG. + | STY1582 | 100    | STY1690  | 48     | STY1582 | 93.02 | STY1690  |
| GTGGCCC -  | STY1684 | 100    | STY4101  | 59.223 | STY1684 | 62.98 | STY1428  |
| ATGCGGC +  | STY0036 | 100    | STY0014  | 73     | STY0036 | 97.22 | STY0014  |
| ATGCATG +  | STY0073 | 100    | STY3505  | 62.136 | STY0073 | 98.8  | STY0402  |
| ATGACTA -  | STY0038 | 100    | STY0035  | 67     | STY0038 | 68.5  | STY0017  |
| ATGAAAA -  | STY0041 | 100    | STY2659  | 66     | STY0041 | 99.6  | STY2659  |
| ATGCGTC -  | STY1197 | 100    | STY0851  | 52.941 | STY1197 | 100   | STY0851  |
|            | STY3390 | 60.55  | STY2213  | 58.252 | STY2213 | 37.62 | STY3390  |
| ATGCTAA -  | STY3455 | 100    | STY3033  | 62.385 | STY3455 | 99.2  | STY0002  |
| ATGATTC +  | STY3412 | 100    | STY4468  | 62.376 | STY3412 | 99.5  | STY4184  |
|            | STY2651 | 43.81  |          |        | STY2651 | 12.3  |          |
| ATGGATC +  | STY0989 | 99     | STY2460  | 53.398 | STY0989 | 99.5  | STY2460  |
|            | STY0310 | 58.654 |          |        | STY0310 | 24.84 |          |
| ATGGATT +  | STY0798 | 100    | STY3643  | 83     | STY0798 | 98.6  | STY3643  |
|            | STY3803 | 64.356 | STY2602  | 63.725 | STY0368 | 4.24  | STY1369  |
|            | STY1217 | 62.617 | STY0308  | 57.282 | STY0308 | 36.21 | STY1217  |
|            | STY2719 | 58.824 |          |        | STY2719 | 21.37 |          |
|            | STY3920 | 65.686 | STY3176  | 63     | STY3176 | 15.22 | STY3920  |
|            | STY4221 | 59.434 | STY1913  | 59.223 | STY4221 | 13.2  | STY1913  |
|            | STY3566 | 59     |          |        | STY3566 | 35.66 |          |
| ATGTTTA -  | STY2128 | 100    | STY4234  | 63.725 | STY2128 | 99.3  | STY4892  |
|            | STY0046 | 100    | STY0039  | 76     | STY0046 | 98.1  | STY0039  |
|            | STY0118 | 99     | STY4119  | 77     | STY0118 | 96.7  | STY4119  |
|            | STY0259 | 100    | STY2806  | 80     | STY0259 | 99.2  | STY2806  |
| ATGTATG. + | STY0321 | 100    | STY2973  | 57     | STY0321 | 98.1  | STY2973  |
|            | STY0973 | 100    | STY3423  | 78     | STY0973 | 98.9  | STY3423  |
|            | STY1011 | 100    |          |        | STY1011 | 99.8  |          |
|            | STY2222 | 62.376 |          |        | STY2222 | 16.03 |          |
|            | STY3570 | 100    | STY0519  | 81     | STY3570 | 98.7  | STY0519  |
| GTGGATA -  | STY2053 | 100    | STY4805  | 58     | STY2053 | 100   | STY4805  |
| ATGAAAG -  | STY3632 | 100    | STY2305  | 76     | STY3632 | 100   | STY2305  |
| ATGAAAC -  | STY3670 | 100    |          |        | STY3670 | 100   |          |
| ATGATCA -  | STY2889 | 100    | STY3695  | 100    | STY2889 | 100   | STY3695  |
| TTGAGGA +  | STY3950 | 100    | STY4205  | 61.818 | STY3950 | 100   | STY4205  |
| ATGAAAC -  | STY1545 | 100    | STY3353  | 61     | STY1545 | 100   | STY3353  |
| ATGACTA. + | STY2071 | 100    | STY1302  | 48     | STY2071 | 100   | STY1302  |
| GTGATAA +  | STY2349 | 100    | STY2758  | 64.706 | STY2349 | 100   | STY2085  |
|            | STY2730 | 100    | STY3429  | 79.412 | STY2730 | 100   | STY3429  |
| ATGAAAC +  | STY3918 | 100    | STY3084  | 58.416 | STY3918 | 100   | STY3084  |
| ATGGCTA +  | STY1361 | 100    | STY1035  | 45.283 | STY1361 | 100   | STY1035  |
| ATGATTA(-  | STY1599 | 100    | HCM1.232 | 63.725 | STY1599 | 100   | HCM1.232 |
| ATGAAGT -  | STY2351 | 100    |          |        | STY2351 | 100   |          |

|           |         |     |          |        |         |       |          |
|-----------|---------|-----|----------|--------|---------|-------|----------|
| ATGAAGA + | STY2748 | 100 | STY0793  | 74     | STY2748 | 100   | STY0793  |
|           | STY2889 | 100 | STY3695  | 100    | STY2889 | 99.83 | STY3695  |
| ATGATAA - | STY0203 | 100 | STY3501  | 52.427 | STY0203 | 100   | STY3501  |
| ATGACCG + | STY0323 | 100 | STY0328  | 84     | STY0323 | 100   | STY0328  |
| ATGATAA + | STY0479 | 100 | STY0476  | 66     | STY0479 | 100   | STY0476  |
| ATGAAAC + | STY3692 | 100 | STY1639  | 67     | STY3692 | 100   | STY1639  |
| ATGAAAA + | STY3948 | 100 | HCM1.43  | 66.346 | STY3948 | 100   | STY4592  |
| ATGTTCC + | STY4208 | 100 | STY1233  | 61     | STY4208 | 100   | STY1233  |
| ATGCAAA + | STY4521 | 100 | STY4757  | 65     | STY4521 | 100   | STY4748  |
| ATGAATG + | STY4554 | 100 | STY2728  | 65.049 | STY4554 | 100   | STY3877  |
| ATGAATC + | STY4573 | 100 | STY3577  | 59     | STY4573 | 100   | STY3577  |
| ATGGCTA + | STY4672 | 100 |          |        | STY4672 | 100   |          |
| GTGACCA - | STY4825 | 100 | STY4483  | 58.252 | STY4825 | 100   | STY4483  |
| GTGAGCA + | STY4594 | 100 | STY3349  | 65.385 | STY4594 | 100   | STY4593  |
| ATGAAAA - | STY4222 | 100 | STY4217  | 71     | STY4222 | 100   | STY4217  |
| ATGACTT + | STY4526 | 100 | HCM2.004 | 56.863 | STY4526 | 100   | HCM2.004 |
| ATGAAAA + | STY4550 | 100 | STY4551  | 61     | STY4550 | 100   | STY4551  |

|           |         |     |          |        |         |      |          |
|-----------|---------|-----|----------|--------|---------|------|----------|
| ATGCAAC - | STY3018 | 100 |          |        | STY3018 | 100  |          |
| ATGCGTA + | STY0532 | 100 | STY3333  | 75.248 | STY0532 | 99.7 | STY3333  |
| ATGTAA(-  | STY2232 | 100 | STY1897  | 65.138 | STY2232 | 93.5 | STY0294  |
| ATGCTTT(+ | STY3994 | 100 | STY2432  | 68.317 | STY3994 | 98.5 | STY2432  |
| ATGAGAC + | STY0069 | 100 | STY0671  | 78     | STY0069 | 98.5 | STY0671  |
| ATGAATA - | STY0105 | 100 | STY1536  | 60.194 | STY0105 | 99.5 | STY1536  |
| ATGTCTG + | STY0254 | 100 | HCM2.001 | 65     | STY0254 | 99.1 | HCM2.001 |
| ATGGAAA + | STY3485 | 100 | STY4673  | 66     | STY3485 | 99   | STY2605  |
| ATGGCTG - | STY3524 | 100 | STY3744  | 61.321 | STY3524 | 99.5 | STY0883  |
| ATGAAAA + | STY3557 | 100 | STY1553  | 52.427 | STY3557 | 98.9 | STY1553  |
| ATGACGC - | STY0690 | 100 | STY0147  | 64.078 | STY0690 | 99.3 | STY0147  |
| ATGATTA(- | STY0707 | 100 | STY2159  | 76     | STY0707 | 98.6 | STY0866  |
| ATGGCAG - | STY0191 | 100 |          |        | STY0191 | 98.5 |          |
| ATGTCTG - | STY0213 | 100 | STY2554  | 61.386 | STY0213 | 98.1 | STY2554  |
| ATGGCGA + | STY0247 | 100 |          |        | STY0247 | 98.3 |          |
| ATGCAAA - | STY1553 | 100 | STY3307  | 80     | STY1553 | 99   | STY3307  |
| ATGATGA - | STY1522 | 100 |          |        | STY1522 | 98.6 |          |
|           | STY2430 | 60  | STY2284  | 53.846 | STY2430 | 8.69 | STY2284  |
| ATGAATA(+ | STY4242 | 100 | STY1588  | 63.208 | STY4242 | 98   | STY2479  |
| ATGATGA + | STY4909 | 100 |          |        | STY4909 | 99.1 |          |
| ATGCCTC + | STY0278 | 99  | STY1538  | 74.757 | STY0278 | 96   | STY1538  |
| ATGATGA - | STY0354 | 100 | STY3635  | 66     | STY0354 | 98.9 | STY3635  |

|           |         |        |         |        |         |       |         |
|-----------|---------|--------|---------|--------|---------|-------|---------|
| TTGACCA - | STY1089 | 100    |         |        | STY1089 | 99    |         |
|           | STY4625 | 100    | STY3677 | 98     | STY4625 | 92.29 | STY3677 |
|           | STY0322 | 57.143 | STY1779 | 51.961 | STY0322 | 13.54 | STY1779 |
|           | STY3025 | 93     | STY4835 | 93     | STY3025 | 63    | STY4835 |
| ATGTAA(-  | STY1095 | 100    | STY4329 | 90     | STY1095 | 98.8  | STY4329 |
| ATGGCAA - | STY1155 | 100    | STY0049 | 48.571 | STY1155 | 98.7  | STY0049 |



|           |         |        |          |        |         |       |          |
|-----------|---------|--------|----------|--------|---------|-------|----------|
| ATGCCAG + | STY1193 | 100    | STY1286  | 64.151 | STY1193 | 98.7  | STY3577  |
| GTGAATC + | STY3886 | 100    | STY4451  | 71     | STY3886 | 98.5  | STY4451  |
| ATGCCGC + | STY1138 | 100    | STY4234  | 61.386 | STY1138 | 98.4  | STY2936  |
| GTGTGCC + | STY1175 | 100    | STY3070  | 62     | STY1175 | 99.4  | STY3070  |
| ATGAGCA + | STY1235 | 100    | STY2826  | 59.804 | STY1235 | 100   | STY2826  |
| ATGCCTG + | STY1256 | 100    | STY0821  | 73.529 | STY1256 | 99.1  | STY0821  |
| ATGTCCA + | STY4272 | 100    | STY4803  | 65.094 | STY4272 | 99.4  | STY4803  |
| ATGATGA + | STY1187 | 100    | STY1442  | 69.608 | STY1187 | 99.4  | STY1442  |
| ATGAGCA - | STY4301 | 100    | STY2245  | 70     | STY4301 | 99    | STY2245  |
|           | STY0359 | 62.136 |          |        | STY0359 | 6.38  |          |
| ATGAATT + | STY1834 | 100    | STY2336  | 82     | STY1834 | 98.2  | STY2859  |
| ATGAATA + | STY3867 | 100    |          |        | STY3867 | 98    |          |
| ATGAGTC + | STY3783 | 100    | STY2242  | 80     | STY3783 | 99.3  | STY2242  |
|           | STY2900 | 55     |          |        | STY2900 | 7.55  |          |
|           | STY1626 | 85     | STY1004  | 63     | STY1626 | 70.9  | STY1004  |
| ATGTCTA + | STY4466 | 100    | STY3932  | 68     | STY4466 | 98.8  | STY3932  |
| GTGACGC + | STY4503 | 100    | STY0962  | 78     | STY4503 | 98.6  | STY1566  |
|           | STY3068 | 75     | STY1136  | 68.269 | STY3068 | 61.9  | STY1136  |
| ATGAACG - | STY0922 | 100    | STY2583  | 67.961 | STY0922 | 99.6  | STY2583  |
| ATGAAAA - | STY2654 | 100    | STY2499  | 63.725 | STY2654 | 99.3  | STY2499  |
|           | STY2797 | 65.714 | STY0522  | 59     | STY0522 | 29.76 | STY2797  |
| ATGATTC + | STY0935 | 100    | STY2719  | 61.905 | STY0935 | 98.6  | STY2719  |
| ATGCATG + | STY1006 | 100    | STY3652  | 79.412 | STY1006 | 98.1  | STY3652  |
|           | STY2758 | 61.765 |          |        | STY2758 | 11.03 |          |
|           | STY2668 | 70.588 | STY3144  | 66     | STY3144 | 26.36 | STY2668  |
| ATGCTGA + | STY4489 | 100    | STY0235  | 91     | STY4489 | 99.5  | STY4194  |
| ATGGCGA + | STY4694 | 100    | STY3564  | 64.356 | STY4694 | 99.1  | STY2447  |
| ATGAAAA - | STY2615 | 100    | STY1195  | 71     | STY2615 | 99.6  | STY1195  |
| ATGAAAA + | STY2659 | 100    | STY0041  | 66     | STY2659 | 99.7  | STY0041  |
| ATGCGCT - | STY2713 | 100    |          |        | STY2713 | 99.2  |          |
|           | STY2746 | 100    | STY2748  | 58     | STY2746 | 79.13 | STY2748  |
| ATGCCAC + | STY2999 | 100    | STY3312  | 50.962 | STY2999 | 99.3  | STY3312  |
| ATGCTGT - | STY4711 | 100    | STY0920  | 74     | STY4711 | 96    | STY0920  |
| ATGACCA + | STY4748 | 100    | STY4521  | 59.804 | STY4748 | 99.7  | STY4521  |
| ATGAAAC - | STY2485 | 100    | STY0294  | 64.423 | STY2485 | 98.9  | STY4503  |
|           | STY4820 | 100    | STY4284  | 76     | STY4820 | 85.41 | STY4284  |
| ATGGAAA - | STY2565 | 100    | STY3463  | 63.551 | STY2565 | 99.4  | STY0571  |
| ATGGTGA - | STY2556 | 100    | STY0440  | 58     | STY2556 | 98.9  | STY0294  |
|           | STY3876 | 73     | STY3748  | 71.154 | STY4012 | 21.67 | STY1370  |
| ATGAAAT - | STY2162 | 100    | STY0923  | 61     | STY2162 | 98.4  | STY0868  |
| ATGAAAG + | STY4355 | 100    | STY0489  | 63.366 | STY4355 | 99.4  | STY0489  |
| ATGCGTA - | STY1096 | 100    |          |        | STY1096 | 100   |          |
| ATGAAAA - | STY1262 | 100    | STY0910  | 65.347 | STY1262 | 99.4  | STY0910  |
| GTGAAAA - | STY2704 | 100    | HCM2.007 | 64.078 | STY2704 | 99    | STY4448  |
| ATGAAGA - | STY1265 | 100    | STY0912  | 68     | STY1265 | 98.8  | STY0912  |
| GTGAACA + | STY1783 | 100    | STY0997  | 60.194 | STY1783 | 98.9  | STY0997  |
| ATGGGAA + | STY4728 | 100    | HCM1.125 | 69.307 | STY4728 | 98.3  | HCM1.125 |
| ATGACCC - | STY4763 | 100    | STY0244  | 62.745 | STY4763 | 99.3  | STY0244  |
|           | STY2603 | 75     | STY4230  | 73     | STY2603 | 56.15 | STY4230  |
| ATGCATA + | STY1182 | 100    | STY0405  | 56.436 | STY1182 | 99.7  | STY4272  |
| ATGCGCA + | STY2000 | 100    | STY4444  | 52.475 | STY2000 | 98.7  | STY4444  |
| ATGAGCC - | STY1299 | 100    | HCM1.178 | 75     | STY1299 | 100   | HCM1.178 |

|           |         |     |          |        |         |       |          |
|-----------|---------|-----|----------|--------|---------|-------|----------|
| ATGCAAA - | STY1212 | 100 | STY0577  | 62.857 | STY1212 | 98.6  | STY0577  |
|           | STY2296 | 74  | STY2271  | 58.654 | STY2296 | 60.65 | STY2271  |
| ATGGCAA + | STY3986 | 100 | STY3656  | 68     | STY3986 | 98.9  | STY0565  |
| ATGGCAA + | STY3914 | 100 |          |        | STY3914 | 98.8  |          |
| ATGATGA + | STY2834 | 100 | STY0777  | 68     | STY2834 | 98.2  | STY4703  |
| ATGAGCA - | STY0270 | 100 | STY4829  | 62     | STY0270 | 99    | STY4829  |
| ATGCAGT + | STY0109 | 100 | STY4117  | 67     | STY0109 | 99.4  | STY4117  |
| ATGGACA - | STY2614 | 100 | STY4467  | 73.267 | STY2614 | 99.4  | STY4467  |
| ATGATTG - | STY1766 | 100 | STY4400  | 91     | STY1766 | 99.4  | STY4400  |
| ATGGATA + | STY1762 | 100 | STY2882  | 93.069 | STY1762 | 99.3  | STY2882  |
| ATGATGA - | STY1002 | 100 | STY1649  | 78     | STY1002 | 99.6  | STY0365  |
| ATGAAAC + | STY4250 | 100 |          |        | STY4250 | 98.7  |          |
| ATGAATA - | STY1708 | 100 | STY3303  | 61.386 | STY1708 | 96.27 | STY3303  |
| ATGGCAA - | STY2483 | 100 | STY2970  | 76     | STY2483 | 99.4  | STY2970  |
| ATGGCTT + | STY0302 | 99  | STY2625  | 59.813 | STY0302 | 89.9  | STY2625  |
| ATGTCTG - | STY4906 | 100 | STY0655  | 64.706 | STY4906 | 98.6  | STY3400  |
| TTGACCC + | STY4158 | 100 | STY3956  | 72     | STY4158 | 98.3  | STY3956  |
| GTGAAAG + | STY3439 | 100 | STY1353  | 62.376 | STY3439 | 97.2  | STY1353  |
| ATGAAGC - | STY3462 | 100 | HCM1.187 | 56     | STY3462 | 100   | HCM1.187 |
| ATGAAAA + | STY2653 | 100 | STY3119  | 63     | STY2653 | 99.5  | STY2652  |
| GTGGAAA - | STY2766 | 100 | STY2767  | 90     | STY2766 | 88.51 | STY2767  |
| ATGGGAT + | STY0558 | 100 | STY0272  | 68     | STY0558 | 99.4  | STY0272  |
| ATGGCTA - | STY0651 | 100 | STY0684  | 64     | STY0651 | 96.6  | STY0684  |
| ATGACAA - | STY4923 | 100 | STY2580  | 62.963 | STY4923 | 95    | STY2580  |
| ATGAGCC + | STY4131 | 100 | STY4404  | 58.095 | STY4131 | 99    | STY4404  |
| ATGCAGC + | STY4197 | 100 | STY2951  | 64.356 | STY4197 | 99.2  | STY1179  |
| ATGATCG + | STY4201 | 100 | STY0822  | 59     | STY4201 | 99.4  | STY0822  |
|           | STY0357 | 74  | STY4670  | 60.577 | STY0357 | 39.35 | STY4423  |
| ATGGTAA - | STY4797 | 100 |          |        | STY4797 | 98    |          |
| ATGAAAA + | STY1743 | 100 | STY2277  | 65     | STY1743 | 98.8  | STY2277  |
| ATGTTAA - | STY4492 | 100 | STY4162  | 61     | STY4492 | 99.2  | STY4162  |
| GTGAGAA + | STY1207 | 100 | STY0020  | 62.745 | STY1207 | 98.2  | STY0020  |
| ATGAAAC - | STY2695 | 100 |          |        | STY2695 | 98.2  |          |
| ATGATTG - | STY3850 | 100 | STY2785  | 60.194 | STY3850 | 99.1  | STY2785  |
| ATGAGTA + | STY0683 | 100 | STY0931  | 58     | STY0683 | 99.1  | STY4890  |
| ATGAATG - | STY1700 | 98  | STY2188  | 64     | STY1700 | 96.6  | STY2188  |
| ATGCGCC - | STY2240 | 100 | STY4270  | 56.863 | STY2240 | 98.8  | STY4270  |
| ATGCCGT + | STY4096 | 100 | STY3038  | 61.538 | STY4096 | 99.4  | STY3038  |
| ATGGCTA - | STY0846 | 100 | STY1930  | 63.81  | STY0846 | 98    | STY1930  |
| ATGCTGG + | STY0816 | 100 | STY0924  | 71     | STY0816 | 99.2  | STY1573  |
| ATGAAAA + | STY1744 | 100 | STY2096  | 79     | STY1744 | 99    | STY2096  |
| ATGATGT - | STY2581 | 100 | STY2159  | 82     | STY2581 | 98.6  | STY2159  |
| ATGAGCC - | STY0132 | 100 | STY3318  | 55.446 | STY0132 | 98.5  | STY3318  |
| ATGAAAA + | STY0231 | 100 | STY3528  | 87     | STY0231 | 99    | STY3528  |
| GTGAATA + | STY0493 | 100 | STY3715  | 76     | STY0493 | 100   | STY3715  |
| ATGAAAA - | STY4388 | 100 | STY1929  | 62.136 | STY4388 | 98.5  | STY1929  |
| ATGAATA - | STY3004 | 100 | STY1235  | 55.882 | STY3004 | 98.8  | STY1235  |
| ATGAAGA + | STY0593 | 100 | STY0026  | 76     | STY0593 | 98.5  | STY0026  |
| ATGCCGA - | STY0772 | 100 | STY2479  | 75.728 | STY0772 | 98.6  | STY2479  |
| ATGTCCG + | STY0782 | 100 | STY4775  | 63.551 | STY0782 | 96.6  | STY4775  |
| GTGATAC - | STY3711 | 100 | STY1370  | 78     | STY3711 | 97.9  | STY3876  |

|           |         |        |          |        |         |       |         |
|-----------|---------|--------|----------|--------|---------|-------|---------|
| GTGCAA +  | STY4210 | 100    | STY2812  | 61.538 | STY4210 | 98    | STY1209 |
| ATGAGAT + | STY2245 | 100    | STY3827  | 63.462 | STY2245 | 97.1  | STY3827 |
|           | STY3006 | 100    | STY0544  | 61.386 | STY3006 | 70.87 | STY4232 |
| ATGAGTT - | STY2552 | 100    | STY4251  | 63.725 | STY2552 | 99.3  | STY2972 |
| ATGGGCA - | STY3545 | 100    | STY1681  | 62.376 | STY3545 | 98.9  | STY1681 |
| ATGGAAG + | STY4452 | 100    | STY4453  | 100    | STY4453 | 58.83 | STY4452 |
| ATGGTTG - | STY2856 | 100    | STY3212  | 63.107 | STY2856 | 98.9  | STY3212 |
| ATGCGTG - | STY1177 | 100    | STY0089  | 64.078 | STY1177 | 99.3  | STY0089 |
| ATGGTTC - | STY3854 | 100    | STY4264  | 65     | STY3854 | 99.2  | STY3892 |
| ATGTTAC - | STY3716 | 100    | STY2911  | 60.185 | STY3716 | 99.2  | STY2911 |
| ATGAGCC - | STY2968 | 100    |          |        | STY2968 | 98.5  |         |
| ATGTCTA + | STY3861 | 100    | STY3860  | 83     | STY3861 | 98.6  | STY3860 |
| ATGCGCC - | STY0716 | 100    | STY0891  | 55     | STY0716 | 98.9  | STY0891 |
| ATGAGGC + | STY0498 | 100    | STY0127  | 67.327 | STY0498 | 99.1  | STY0127 |
| ATGGCAA + | STY4475 | 100    | STY1674  | 63.107 | STY4475 | 99.1  | STY2252 |
| GTGGTTT + | STY1395 | 100    | HCM2.003 | 62.376 | STY1395 | 98.2  | STY2762 |
| ATGCCAT + | STY3563 | 100    | STY3444  | 64.706 | STY3563 | 98.9  | STY3444 |
| ATGAAAG - | STY3128 | 100    | STY1427  | 60     | STY3128 | 99    | STY1427 |
| ATGACGA - | STY3041 | 100    | STY3240  | 62.136 | STY3041 | 99.5  | STY4649 |
| ATGATAG + | STY3813 | 100    | STY2343  | 63     | STY3813 | 99.3  | STY4295 |
| ATGGAAA - | STY0897 | 100    | STY3988  | 69     | STY0897 | 98.5  | STY3988 |
| ATGAACG + | STY3616 | 99     | STY3550  | 61.818 | STY3616 | 96.9  | STY3550 |
| ATGCCTA - | STY3653 | 100    | STY2093  | 61.321 | STY3653 | 97.1  | STY2093 |
| ATGGATT - | STY0083 | 100    |          |        | STY0083 | 99    |         |
| ATGCAAC - | STY3655 | 100    | STY1078  | 87     | STY3655 | 99.6  | STY3122 |
| ATGAATA - | STY2769 | 100    | STY1573  | 63.462 | STY2769 | 65.03 | STY2664 |
| ATGTCAA + | STY1944 | 100    |          |        | STY1944 | 95.84 |         |
| ATGAATT - | STY1321 | 100    |          |        | STY1321 | 99.4  |         |
| ATGGAAC - | STY3113 | 100    | STY4484  | 65.138 | STY3113 | 99.1  | STY4484 |
| ATGTTTT + | STY3061 | 100    | STY3815  | 87     | STY3061 | 98.8  | STY4114 |
| GTGGCG -  | STY3595 | 100    | STY3596  | 100    | STY3596 | 99.3  | STY3595 |
| ATGTTAG + | STY3621 | 100    | STY3677  | 47     | STY3621 | 97.74 | STY3677 |
| ATGAGTG - | STY3738 | 100    | STY1864  | 63.889 | STY3738 | 100   | STY0119 |
| GTGATTA + | STY1956 | 100    | STY3110  | 87     | STY1956 | 95.03 | STY3110 |
| ATGACAC - | STY1281 | 100    | STY4406  | 62.5   | STY1281 | 98.9  | STY4406 |
| GTGAACA + | STY1907 | 100    | STY3038  | 86     | STY1907 | 98.7  | STY3038 |
| ATGGTTG + | STY1961 | 100    | STY4016  | 66     | STY1961 | 98.16 | STY2336 |
| ATGATGC - | STY2080 | 100    | STY2738  | 64.706 | STY2080 | 98.1  | STY2738 |
| ATGCGTA - | STY2109 | 100    | STY3196  | 69     | STY2109 | 98.5  | STY3196 |
| ATGTTAC + | STY0566 | 100    | STY3040  | 62     | STY0566 | 98.5  | STY3040 |
| ATGCCTA - | STY0586 | 99     |          |        | STY0586 | 83.86 |         |
| TTGTCGG - | STY0616 | 100    | STY0615  | 99     | STY0616 | 59.85 | STY0615 |
| ATGAAAA - | STY1481 | 100    | STY0438  | 70     | STY1481 | 99.1  | STY0438 |
| ATGAGCC - | STY1446 | 100    | STY1153  | 67.961 | STY1446 | 97.46 | STY1153 |
| ATGACAA + | STY1505 | 100    | STY4273  | 74     | STY1505 | 86.15 | STY4273 |
| ATGCGAC - | STY1931 | 100    | STY3928  | 61.386 | STY1931 | 99.1  | STY3928 |
|           | STY1493 | 65.049 | STY3785  | 59.804 | STY1493 | 17.86 | STY3785 |
| ATGACGC + | STY1431 | 100    | STY1868  | 65     | STY1431 | 74.75 | STY1868 |
| ATGGCTA + | STY1397 | 100    | STY0402  | 50.98  | STY1397 | 97.3  | STY2475 |
| ATGATGA - | STY1349 | 100    | STY2248  | 69     | STY1349 | 99    | STY4188 |
| ATGACAG + | STY0675 | 100    | STY0061  | 67     | STY0675 | 98.7  | STY0061 |
| ATGATTG + | STY0986 | 100    | STY1578  | 70.588 | STY0986 | 98.7  | STY1578 |

|            |         |        |          |        |         |       |          |
|------------|---------|--------|----------|--------|---------|-------|----------|
| ATGCTCG +  | STY0961 | 100    | STY2716  | 59     | STY0961 | 99.1  | STY2716  |
| ATGTCAT(+) | STY3251 | 100    | STY3008  | 61.682 | STY3251 | 98    | STY3008  |
| ATGATGA -  | STY0501 | 100    | STY4144  | 77     | STY0501 | 99.3  | STY4144  |
| AAAAATA +  | STY4203 | 100    | STY4202  | 84     | STY3259 | 33.75 | STY4203  |
| ATGGCTT +  | STY3204 | 100    |          |        | STY3204 | 99    |          |
| ATGAAAC +  | STY4112 | 100    | STY0703  | 65.686 | STY4112 | 99.5  | STY0703  |
|            | STY4036 | 99     | STY2775  | 72.816 | STY4036 | 69.19 | STY2775  |
| ATGAAAT +  | STY3355 | 100    | STY4490  | 77     | STY3355 | 99.23 | STY2911  |
| ATGTTGG +  | STY2870 | 100    | STY4280  | 62.264 | STY2870 | 99.1  | STY4897  |
| TTGCTCC -  | STY3202 | 100    | STY0747  | 55.14  | STY3202 | 82.82 | STY0747  |
|            | STY2337 | 59.804 |          |        | STY2337 | 5.17  |          |
| ATGCGCC +  | STY4225 | 100    | STY0851  | 67.647 | STY4225 | 98.5  | STY0851  |
| ATGAGGC -  | STY4178 | 100    | STY0114  | 64.078 | STY4178 | 99.1  | STY0114  |
| ATGTCCG -  | STY4046 | 100    | STY2738  | 66.981 | STY4046 | 99.3  | STY2738  |
| ATGAATA +  | STY2859 | 100    | STY1834  | 82     | STY2859 | 98.6  | STY2336  |
| GAAATGG -  | STY4608 | 100    | STY1366  | 90     | STY2889 | 73.26 | STY3695  |
| ATGGCAA +  | STY3243 | 100    | STY2115  | 64.762 | STY3243 | 99.9  | STY4483  |
| ATGTCAA -  | STY0486 | 100    |          |        | STY0486 | 98.4  |          |
|            | STY0898 | 60     |          |        | STY0898 | 10.87 |          |
| ATGCAGC +  | STY2340 | 100    | STY2341  | 75     | STY2340 | 98.6  | STY2341  |
| ATGACCA -  | STY2401 | 100    | STY1550  | 60.377 | STY2401 | 98.7  | STY0642  |
| ATGTGGT +  | STY4385 | 99     | STY2460  | 61.111 | STY4385 | 97.8  | STY2460  |
| ATGACGC +  | STY0938 | 100    | STY0924  | 76     | STY0938 | 99.2  | STY0985  |
| ATGCAAA +  | STY4744 | 100    | STY4119  | 78     | STY4744 | 97.7  | STY4119  |
| GTGATAA +  | STY4817 | 100    | STY0429  | 62.136 | STY4817 | 98.8  | STY2973  |
| ATGAAAG +  | STY0927 | 100    | STY2538  | 62.745 | STY0927 | 98.7  | STY3493  |
| GTGCAGT +  | STY4724 | 100    |          |        | STY4724 | 99.8  |          |
| ATGAATA(-) | STY3428 | 100    | STY3763  | 56     | STY3428 | 98.7  | STY3763  |
| ATGAGCC -  | STY3318 | 100    | STY1525  | 75     | STY3318 | 98.9  | STY1525  |
| ATGAGCC +  | STY2955 | 100    | STY4720  | 71     | STY2955 | 97.5  | STY1948  |
| ATGGCGA -  | STY2964 | 100    |          |        | STY2964 | 98.8  |          |
|            | STY0385 | 64     | HCM2.001 | 60.377 | STY4386 | 23.04 | HCM2.001 |
| ATGTTTA(-) | STY2970 | 100    | STY2717  | 59.223 | STY2970 | 98.3  | STY2717  |
| ATGTTTA(+) | STY2461 | 100    | STY0532  | 58.252 | STY2461 | 100   | STY0532  |
| ATGCAGC -  | STY2322 | 99     | STY1152  | 51.923 | STY2322 | 98.6  | STY1152  |
| ATGTTTA(+) | STY2434 | 100    | STY2894  | 71     | STY2434 | 98.9  | STY2894  |
| ATGAAAC -  | STY1897 | 100    | STY3378  | 68.627 | STY1897 | 98.6  | STY3176  |
| ATGCGTA +  | STY3247 | 100    | STY0961  | 64.706 | STY3247 | 92.72 | STY0961  |
| ATGCAGA +  | STY0758 | 100    | STY2373  | 68.224 | STY0758 | 99.7  | STY2373  |
| ATGAGTA +  | STY0831 | 100    |          |        | STY0831 | 99.4  |          |
|            | STY3213 | 54.902 |          |        | STY3213 | 4.8   |          |
| ATGACCG +  | STY3503 | 100    |          |        | STY3503 | 99.3  |          |
| ATGTCTA(-) | STY4025 | 100    | STY0948  | 85     | STY4025 | 98.4  | STY0948  |
| GTGTTAG +  | STY0879 | 100    | STY4339  | 71.287 | STY0879 | 98.85 | STY1083  |
| ATGAAAA +  | STY3528 | 100    | STY0231  | 89     | STY3528 | 99.2  | STY0231  |
| ATGTTTA(+) | STY3443 | 100    | STY1450  | 66.346 | STY3443 | 99.2  | STY4000  |
| ATGTCAT(+) | STY3371 | 100    | STY3883  | 64     | STY3371 | 98.8  | STY3883  |
| ATGAAAA -  | STY2492 | 100    | STY2160  | 60.577 | STY2492 | 98.4  | STY2160  |
| ATGAATA +  | STY0790 | 100    | STY0113  | 52.941 | STY0790 | 99.8  | STY0113  |
| ATGCGAT +  | STY3479 | 100    | STY2569  | 61.321 | STY3479 | 98.4  | STY2569  |
| ATGTCGA +  | STY3409 | 100    | STY2542  | 66     | STY3409 | 99    | STY2542  |
| ATGTCCG -  | STY4153 | 100    | STY1967  | 81     | STY4153 | 99.5  | STY0678  |

|           |          |        |           |        |          |       |           |
|-----------|----------|--------|-----------|--------|----------|-------|-----------|
| ATGACTG + | STY3229  | 100    | STY3413   | 60     | STY3229  | 98.4  | STY3413   |
| ATGCATC + | STY0774  | 100    | STY3878   | 50.962 | STY0774  | 62.8  | STY3878   |
| ATGTATT(+ | STY0822  | 100    | STY0167   | 78.431 | STY0822  | 98.8  | STY0167   |
| ATGATCG + | STY0787  | 100    | STY1921   | 83     | STY0787  | 98.6  | STY1921   |
| ATGTCCC + | STY4066  | 100    | STY0111   | 57.547 | STY4066  | 100   | STY0111   |
| ATGTCGA - | STY2993  | 100    |           |        | STY2993  | 99    |           |
| ATGGATT(- | STY1707  | 100    | HCM2.001: | 43     | STY1707  | 98.9  | HCM2.001: |
| ATGTTTG(- | STY1953  | 100    |           |        | STY1953  | 99.4  |           |
| ATGTTAA(+ | STY0613  | 100    | STY2599   | 60.194 | STY0613  | 98.3  | STY2599   |
| ATGAATA(+ | STY1731  | 100    |           |        | STY1731  | 99.6  |           |
| ATGGCTT - | STY4289  | 100    | STY0138   | 60.194 | STY4289  | 97.9  | STY2317   |
| ATGTCTG - | STY3737  | 100    | STY2527   | 63.366 | STY3737  | 99.5  | STY2527   |
| GTGGATA + | STY3708  | 100    | STY3220   | 64.078 | STY3708  | 98.09 | STY1537   |
| ATGAAAT - | STY3579  | 100    | STY3370   | 63     | STY3579  | 99.2  | STY3370   |
|           | STY4617  | 100    | STY3685   | 90     | STY4617  | 84.51 | STY3685   |
| ATGACGA - | STY1475  | 100    | STY1930   | 61.386 | STY1475  | 98.61 | STY4908   |
| ATGACGA - | STY0119  | 100    | STY3110   | 59.434 | STY0119  | 98.1  | STY3110   |
| CTACGCC + | STY1657  | 100    | STY3405   | 62.376 | STY1657  | 72.46 | STY0723   |
| ATGTTCC - | STY1876  | 99     |           |        | STY1876  | 96.6  |           |
| ATGAAAA - | STY3003  | 99     | STY4077   | 49     | STY3003  | 97.7  | STY4077   |
| ATGGGTT - | STY2916  | 100    | STY3904   | 77.67  | STY2916  | 99.4  | STY3904   |
| ATGTCAT(- | STY0133  | 98.851 | STY4928   | 34.483 | STY0133  | 98.9  | STY4928   |
| GTGGCAC - | STY4604  | 95     | STY2885   | 89     | STY4604  | 93.3  | STY2885   |
|           | STY4345  | 37.778 |           |        | STY4345  | 36.54 |           |
|           | STY1533  | 100    | STY1222   | 57.009 | STY1533  | 45.55 | STY1222   |
| ATGAACC + | STY3985  | 100    | STY1140   | 54.545 | STY3985  | 100   | STY1140   |
| ATGATTA(- | STY3469  | 100    | STY0077   | 78     | STY3469  | 99.8  | STY0077   |
| ATGAGTA - | STY3472  | 100    | STY3472   | 70     | STY3472  | 98.3  | STY3472   |
| ATGAATC + | STY1036  | 100    | STY1388   | 62.376 | STY1036  | 99.6  | STY1730   |
|           | STY2895  | 64     | STY0269   | 60.377 | STY0269  | 13.86 | STY2895   |
| ATGAAGT + | STY0789  | 99     |           |        | STY0789  | 98.6  |           |
|           | STY1209  | 64.423 | STY3562   | 52.475 | STY1209  | 17.25 | STY3562   |
|           | HCM1.177 | 55     | HCM1.178: | 49     | HCM1.177 | 14.45 | HCM1.178: |
| GTGACGA + | STY4845  | 99     | STY3883   | 69     | STY4845  | 93.27 | STY3883   |
|           | STY1878  | 73     | STY0380   | 52     | STY1878  | 60    | STY0380   |
|           | HCM1.109 | 65.385 | STY2356   | 60.55  | STY2356  | 17.59 | STY1436   |
|           | STY2077  | 75     | STY2892   | 50.495 | STY2077  | 72.02 | STY2892   |
|           | STY0007  | 100    | STY2710   | 71     | STY0007  | 99    | STY2710   |
|           | STY2203  | 100    | STY1649   | 84     | STY2203  | 74.09 | STY1002   |
|           | STY2307  | 100    | STY3633   | 79     | STY2307  | 98.8  | STY3633   |
|           | STY2439  | 100    | STY3925   | 76     | STY2439  | 99.3  | STY3925   |
|           | STY2447  | 100    | STY4235   | 61.111 | STY2447  | 80.99 | STY4694   |
|           | STY3325  | 100    | STY1000   | 73.786 | STY3325  | 98.1  | STY1000   |
|           | STY3394  | 100    | STY3325   | 73     | STY3394  | 94.5  | STY3325   |
|           | STY3423  | 100    | STY0973   | 81     | STY3423  | 98.9  | STY0973   |
|           | STY3528  | 100    | STY0231   | 71     | STY3528  | 99.3  | STY0231   |
|           | STY4023  | 62.617 | STY4420   | 34     | STY4023  | 25.08 | STY4420   |
| ATGTCGT - | STY2061  | 100    | STY2810   | 58.333 | STY2061  | 100   | STY2810   |

|           |         |              |                |               |
|-----------|---------|--------------|----------------|---------------|
| ATGCAGC + | STY2077 | 100 STY2011  | 78 STY2077     | 100 STY2011   |
| ATGGGCC - | STY2356 | 100 STY2357  | 49 STY2356     | 100 STY2294   |
| GTGGCAC - | STY2885 | 100 STY3699  | 100 STY2885    | 100 STY3699   |
| ATGATGC + | STY0115 | 100 STY0158  | 59 STY0115     | 100 STY0158   |
| ATGTTCA + | STY0312 | 100 STY0314  | 92 STY0312     | 100 STY0314   |
| ATGCAAC - | STY3644 | 100 STY3591  | 65.049 STY3644 | 100 STY3591   |
| ATGCCAT + | STY3672 | 100 HCM2.007 | 56.731 STY3672 | 100 HCM2.007  |
| ATGACGC + | STY3688 | 100 STY4614  | 87 STY3688     | 100 STY4614   |
| ATGTATC - | STY3066 | 100 STY0673  | 55.34 STY3066  | 100 STY0673   |
| ATGACAT + | STY0296 | 100 STY0736  | 58 STY0296     | 100 STY0736   |
| ATGAATT + | STY0345 | 100 STY0443  | 63 STY0345     | 100 STY0443   |
| ATGGGAA - | STY3674 | 100 STY4628  | 91 STY3674     | 100 STY4628   |
| ATGAATA + | STY3690 | 100 STY4612  | 100 STY3690    | 100 STY4612   |
| ATGCGCT + | STY3922 | 100 STY0029  | 62.136 STY3922 | 100 STY0029   |
| GTGAAAC + | STY1367 | 100          | STY1367        | 100           |
| ATGGCAA - | STY1601 | 100          | STY1601        | 100           |
| ATGGCTT + | STY1618 | 100 STY0102  | 59.048 STY1618 | 100 STY0102   |
| ATGATGA - | STY2883 | 100 STY3701  | 100 STY2883    | 100 STY3701   |
| ATGGATT - | STY3070 | 100 STY2393  | 61 STY3070     | 100 STY1383   |
| ATGAACA + | STY3675 | 100 STY4627  | 100 STY4627    | 100 STY3675   |
| ATGAGCT - | STY4651 | 100          | STY4651        | 100           |
| ATGGGGA + | STY4676 | 100 STY4586  | 63 STY4676     | 100 STY4586   |
| GTGCACC + | STY4829 | 100 STY4828  | 96 STY4829     | 69.57 STY1226 |
| ATGGTCA + | STY4560 | 100 STY2604  | 60.952 STY4560 | 100 STY2604   |
| ATGAGAT + | STY4577 | 100 STY1489  | 60.396 STY4577 | 100 STY1489   |
| ATGAACA - | STY4883 | 100 STY0486  | 62 STY4883     | 100 STY0486   |
| GTGGCAC - | STY4635 | 100 STY3668  | 95 STY4635     | 100 STY3668   |
| ATGATTA(- | STY4656 | 100          | STY4656        | 100           |
| ATGACGC + | STY4673 | 100 STY2605  | 66 STY4673     | 100 STY2605   |

|            |         |               |                |               |
|------------|---------|---------------|----------------|---------------|
| GTGAGCC -  | STY4490 | 100 STY3355   | 76 STY4490     | 98.7 STY3355  |
|            | STY4821 | 55 STY4680    | 52 STY4821     | 7.76 STY4680  |
| ATGTTTT/ + | STY3904 | 100 STY1256   | 69 STY3904     | 98.5 STY1256  |
| ATGAAGC +  | STY3499 | 100           | STY3499        | 99.2          |
| ATGACGC -  | STY3359 | 100 STY3943   | 80 STY3359     | 99.3 STY3943  |
| ATGTACG -  | STY3483 | 100 STY2668   | 61.386 STY3483 | 100 STY2668   |
| ATGAACG +  | STY0072 | 100 STY0668   | 68 STY0072     | 99.6 STY0668  |
| ATGATCA +  | STY0154 | 100           | STY0154        | 99.6          |
| ATGAAGA -  | STY0189 | 100 STY1670   | 59.406 STY0189 | 99.4 STY1670  |
| ATGACTG -  | STY0210 | 100 STY2459   | 62.5 STY0210   | 94.18 STY0387 |
| TTGCTGA +  | STY0245 | 100 STY2501   | 76.238 STY0245 | 99.2 STY2501  |
|            | STY1555 | 100 STY2424   | 62.857 STY1555 | 56.69 STY1520 |
| GTGAGGC +  | STY3549 | 100 STY2694   | 64.356 STY3549 | 98.8 STY2928  |
| ATGTTCG +  | STY0680 | 100 STY2651   | 61.538 STY0680 | 99.2 STY2651  |
|            | STY2911 | 52.83 STY2258 | 51 STY2911     | 7.84 STY2258  |
| ATGCGTA +  | STY0725 | 100 STY2244   | 62.5 STY0725   | 99.4 STY2244  |
| ATGAACA +  | STY0754 | 100 STY2475   | 64.815 STY0754 | 99.2 STY2475  |

|           |         |        |          |         |               |
|-----------|---------|--------|----------|---------|---------------|
| ATGTTCG - | STY2635 | 100    |          | STY2635 | 99.4          |
| ATGAAAT - | STY2311 | 100    | STY2164  | 60.194  | STY2311 98.8  |
|           | STY0676 | 61.386 | STY0270  | 50      | STY0676 9.69  |
| ATGACAG + | STY0305 | 100    | STY4157  | 56      | STY0305 98.9  |
|           | STY1242 | 73     | STY0723  | 66      | STY0723 18.48 |
| ATGCAGC - | STY2897 | 99     | STY1117  | 60.784  | STY2897 95.4  |
|           | STY1682 | 68.317 |          | STY1682 | 44.84         |
| ATGGAAA + | STY0294 | 100    | STY2849  | 73.267  | STY0294 98.09 |
|           | STY2954 | 65     | STY2485  | 63.366  | STY2954 21.49 |
| ATGAAAT + | STY0368 | 100    |          | STY0368 | 97.7          |
| ATGCCAA - | STY1117 | 100    | STY2897  | 61      | STY1117 98.5  |
| ATGTATC + | STY4386 | 100    | STY4610  | 60.784  | STY4386 97.7  |
| ATGCAAG + | STY4332 | 100    | STY2837  | 60.952  | STY4332 98.3  |
| ATGACTG - | STY1103 | 100    | STY2617  | 61      | STY1103 99.1  |
| ATGACAA + | STY1561 | 100    | STY3539  | 62.857  | STY1561 99.3  |
| ATGAAAG + | STY4343 | 100    | STY2513  | 62.857  | STY4343 99.3  |
| ATGGCTT + | STY4304 | 100    | STY1334  | 65.138  | STY4304 99    |
| ATGGAAA + | STY1278 | 100    | STY3342  | 63.208  | STY1278 99.4  |
| ATGATTG - | STY1839 | 100    | STY3539  | 62.376  | STY1839 97.7  |
| ATGGAAG + | STY4341 | 100    | STY0101  | 77.228  | STY4341 99.2  |
| GTGGGC +  | STY1249 | 100    | STY3998  | 60.396  | STY1249 99    |
| ATGATGG - | STY1871 | 100    | STY3342  | 88      | STY1871 98.9  |
|           | STY3188 | 65.094 | STY0354  | 62.136  | STY2762 51.25 |
| ATGCAAA + | STY3828 | 100    | STY3495  | 62      | STY3828 96.1  |
|           | STY1630 | 82     |          | STY1630 | 30            |
| ATGATGA - | STY3794 | 100    | STY3895  | 63      | STY3794 99.6  |
|           | STY3951 | 62.037 |          | STY3951 | 11.55         |
| ATGCCTG - | STY2982 | 100    | STY2875  | 58      | STY2982 99.1  |
| ATGACAA - | STY3043 | 100    | STY3430  | 63      | STY3043 55.62 |
| ATGCCAA - | STY2608 | 100    | HCM1.190 | 61.165  | STY2608 98    |
| ATGCCGC - | STY2651 | 100    | STY2744  | 70      | STY2651 98.8  |
| ATGTCTG - | STY2723 | 100    | STY2373  | 60.396  | STY2723 97.5  |
| ATGAATA - | STY0955 | 100    | STY2678  | 67.961  | STY0955 98.6  |
|           | STY2469 | 95     | STY3691  | 75      | STY2469 24.41 |
| ATGAAGC + | STY3788 | 100    |          | STY3788 | 99.8          |
| ATGAAAA + | STY4421 | 100    | STY3402  | 61.538  | STY4421 99.1  |
| ATGACAA - | STY3038 | 100    | STY4284  | 69      | STY3038 98.6  |
|           | STY3065 | 86     | STY0752  | 78      | STY3065 73.08 |
| TTGGGAT + | STY0914 | 100    |          | STY0914 | 83.12         |
|           | STY2723 | 61.386 | STY4928  | 59.223  | STY1036 24.34 |
|           | STY0380 | 67.647 | STY2940  | 62.5    | STY0380 21.36 |
| ATGTCTG - | STY2770 | 100    | STY1551  | 51.485  | STY2770 98.5  |
| ATGGTAA + | STY1759 | 100    | STY1768  | 60.952  | STY1759 99.6  |
| GTAAAA +  | STY2145 | 100    | STY3460  | 64      | STY2145 99.2  |
| TTGAGTA - | STY2202 | 100    | STY2949  | 62.745  | STY2202 97.33 |
|           | STY2973 | 56.075 |          | STY2973 | 19.56         |
|           | STY0176 | 63.462 | STY4289  | 62.745  | STY3075 5.26  |
| ATGAATA - | STY4873 | 100    | STY3448  | 64.423  | STY4873 98.6  |
| ATGAATT - | STY4857 | 100    | STY4648  | 90      | STY4857 99.6  |
| ATGAGCT - | STY2597 | 100    |          | STY2597 | 98.8          |
| ATGTTAC + | STY1268 | 100    | STY1964  | 52.941  | STY1268 98.1  |

|            |         |        |          |        |          |       |          |
|------------|---------|--------|----------|--------|----------|-------|----------|
| ATGGCTC -  | STY1775 | 100    | STY0305  | 63.107 | STY1775  | 100   | STY0305  |
| ATGGGTT +  | STY2670 | 100    | STY0723  | 72     | STY2670  | 100   | STY0723  |
| ATGACGA +  | STY1840 | 100    | STY1956  | 78.431 | STY1840  | 98.6  | STY3519  |
| ATGAAAAI - | STY1099 | 100    | STY3307  | 54.369 | STY1099  | 99.2  | STY3307  |
| ATGAGAA -  | STY2987 | 100    | STY1942  | 61.682 | STY2987  | 99.1  | STY1942  |
| ATGAGTC +  | STY2494 | 100    | STY4182  | 62.264 | STY2494  | 99.3  | STY2550  |
| GTGAGTC -  | STY2154 | 100    | STY0985  | 55.769 | STY2154  | 98.2  | STY0985  |
| ATGCTGG -  | STY2490 | 100    | STY0826  | 61.765 | STY2490  | 97.7  | STY0826  |
| ATGAGCC -  | STY1797 | 100    | STY4048  | 65.686 | STY1797  | 99.4  | STY4048  |
|            | STY2369 | 52.427 |          |        | STY2369  | 6.21  |          |
|            | STY1672 | 100    | STY2672  | 60.396 | STY1672  | 76.54 | STY2672  |
| ATGGCAA +  | STY1587 | 100    | STY4229  | 77.228 | STY1587  | 98.1  | STY4229  |
| ATGAAAA +  | STY4428 | 100    | STY0838  | 64     | STY4428  | 99.1  | STY0838  |
| ATGCGCA +  | STY3952 | 100    | STY3954  | 46     | STY3952  | 97.7  | STY3954  |
| ATGCCGC +  | STY3975 | 100    | STY0541  | 64.762 | STY3975  | 99.2  | STY2746  |
| ATGGCAA +  | STY0239 | 100    | STY3788  | 67.647 | STY0239  | 99.9  | STY3788  |
| ATGACAG -  | STY0404 | 100    | STY3540  | 55.34  | STY0404  | 99.4  | STY3540  |
| ATGATCA +  | STY0152 | 100    |          |        | STY0152  | 99.6  |          |
| ATGGATT -  | STY2557 | 100    | STY2969  | 73.077 | STY2557  | 99.2  | STY2969  |
| ATGGGAC +  | STY1329 | 100    | STY3971  | 64.815 | STY1329  | 98    | STY3971  |
| ATGAAAT +  | STY3941 | 100    | STY1140  | 64.151 | STY3941  | 98.31 | STY1140  |
| ATGAATT +  | STY1728 | 100    | STY3951  | 63     | STY1728  | 98.2  | STY3951  |
|            | STY1649 | 100    | STY2203  | 88     | STY2493  | 67.4  | STY1649  |
| ATGCTGA +  | STY0592 | 100    | STY0025  | 78     | STY0592  | 98.7  | STY0025  |
| ATGGCGA -  | STY3934 | 100    | STY4784  | 66.99  | STY3934  | 99.5  | STY2944  |
| ATGTACA +  | STY0387 | 100    | STY3519  | 69     | STY0387  | 99.4  | STY3519  |
| ATGGATC -  | STY2837 | 100    | STY0270  | 62.963 | STY2837  | 96.85 | STY4332  |
| ATGCAAA +  | STY3393 | 100    |          |        | STY3393  | 97.84 |          |
| ATGTTGA +  | STY4279 | 100    | STY1904  | 63     | STY4279  | 98.8  | STY3813  |
|            | STY2295 | 61.538 | STY4076  | 60.784 | STY2629  | 49.82 | STY0282  |
|            | STY0405 | 65.347 | HCM1.247 | 63.208 | HCM1.247 | 15.11 | STY4459  |
|            | STY3325 | 29     |          |        | STY3325  | 8.27  |          |
| ATGAATC +  | STY0637 | 100    | STY2523  | 63.889 | STY0637  | 99.1  | STY2409  |
| ATGACTG -  | STY4737 | 100    | STY1403  | 62.617 | STY4737  | 98.4  | STY4280  |
| ATGGAGT -  | STY4816 | 100    | STY2782  | 70.642 | STY4816  | 98.5  | STY2782  |
| ATGACCA +  | STY2843 | 100    | STY2613  | 52     | STY2843  | 99.1  | STY2613  |
| ATGGCTC -  | STY3381 | 100    | HCM2.001 | 62.857 | STY3381  | 98.7  | HCM2.001 |
| ATGAGTA -  | STY3426 | 100    | STY3109  | 74.257 | STY3426  | 98.9  | STY3167  |
| ATGAATA -  | STY3431 | 100    | STY2519  | 66     | STY3431  | 99.4  | STY2519  |
| ATGAACG -  | STY2519 | 100    | STY1140  | 72.277 | STY2519  | 99.8  | STY1140  |
| ATGTCAT -  | STY2737 | 100    | STY0920  | 90     | STY2737  | 98.8  | STY3250  |
| ATGCAAA +  | STY0530 | 100    | STY3355  | 64.706 | STY0530  | 98.7  | STY3355  |
| ATGAGTG -  | STY0515 | 100    | STY0249  | 61     | STY0515  | 99.1  | STY0249  |
|            | STY0619 | 64.486 | STY2477  | 61.386 | STY2477  | 15.31 | STY3962  |
| ATGTCCG +  | STY3874 | 100    | STY3523  | 61.765 | STY3874  | 99.1  | STY3523  |
| ATGATCT -  | STY0883 | 100    | STY2095  | 66.337 | STY0883  | 99.1  | STY0968  |
| ATGAACT +  | STY0781 | 100    | STY2768  | 60.577 | STY0781  | 98.5  | STY2768  |
| ATGGCAA +  | STY3875 | 100    | STY2911  | 63.107 | STY3875  | 99.6  | STY2911  |
| ATGAAAA -  | STY2584 | 100    | STY2585  | 83     | STY2584  | 99.5  | STY2585  |
| GTGAAAC +  | STY0138 | 100    | STY3355  | 66.019 | STY0138  | 99.5  | STY4100  |
| ATGGCAA -  | STY0732 | 100    | STY3201  | 64.078 | STY0732  | 99.2  | STY3201  |



|            |          |     |           |        |          |       |           |
|------------|----------|-----|-----------|--------|----------|-------|-----------|
| ATGATGA +  | STY0778  | 100 | STY4702   | 73     | STY0778  | 98.9  | STY4702   |
| GTGATTG +  | STY0251  | 100 | STY3351   | 60.784 | STY0251  | 99.6  | STY0249   |
| GTGTTTA -  | STY2861  | 100 | STY4883   | 61.682 | STY2861  | 99.2  | STY4883   |
| ATGGCTA +  | STY4718  | 100 |           |        | STY4718  | 99.4  |           |
| ATGACCC -  | STY1902  | 100 |           |        | STY1902  | 99    |           |
| ATGAATA +  | STY2741  | 100 | STY1294   | 59.434 | STY2741  | 99.1  | STY1294   |
| ATGTTCA -  | STY0885  | 100 | STY1809   | 58.182 | STY0885  | 98.2  | STY1809   |
| ATGATTA -  | STY3809  | 100 | STY1085   | 70.297 | STY3809  | 99.2  | STY1085   |
| ATGTCAA +  | STY0709  | 100 | STY0708   | 69     | STY0709  | 98.9  | STY2160   |
| ATGTCTG -  | STY4398  | 100 | STY0079   | 62     | STY4398  | 98.9  | STY0079   |
| ATGGCTA +  | STY1464  | 100 | STY0502   | 49     | STY1464  | 98.7  | STY0502   |
| GTGATGA -  | STY1013  | 98  | STY2769   | 57.143 | STY1013  | 92.9  | STY2769   |
| ATGAACG +  | STY2253  | 100 | STY0577   | 75.728 | STY2253  | 97.2  | STY0577   |
| ATGTTCCG - | STY4485  | 100 | STY2561   | 59.615 | STY4485  | 98.8  | STY2561   |
| ATGAGTA +  | STY2157  | 100 | STY4225   | 67     | STY2157  | 100   | STY4137   |
|            | STY4458  | 100 | STY4459   | 63     | STY4458  | 98.6  | STY4459   |
| GTGCTGC -  | STY3537  | 100 | STY1551   | 64     | STY3537  | 90.35 | STY3162   |
| ATGAACG -  | STY0010  | 100 | STY2481   | 62.857 | STY0010  | 99.3  | STY2481   |
| ATGGTGA +  | STY0003  | 100 | STY0734   | 63.551 | STY0003  | 99.5  | HCM2.011  |
| ATGGATA -  | STY1779a | 100 | STY1011   | 61.386 | STY1779a | 99    | STY4057   |
| ATGACAG -  | STY2078  | 98  | STY1728   | 48.077 | STY2078  | 94.19 | STY1728   |
| ATGGTAC +  | STY3447  | 100 | STY4193   | 66.364 | STY3447  | 49.94 | STY4193   |
| ATGAAAA +  | STY2712  | 100 | STY2439   | 62.264 | STY2712  | 100   | STY2439   |
| ATGAGTG -  | STY2421  | 100 | STY3895   | 59.804 | STY2421  | 98.7  | STY3895   |
| ATGACCC +  | STY0619  | 100 | STY4095   | 66.337 | STY0619  | 97.6  | STY4095   |
| ATGGCGC +  | STY0218  | 100 | STY0396   | 85     | STY0218  | 98.6  | STY0396   |
|            | STY4459  | 100 | STY4458   | 67     | STY4459  | 81.07 | STY4458   |
| ATGCACG -  | STY2555  | 100 | STY3422   | 63.208 | STY2555  | 99.6  | STY4923   |
| ATGAAAA +  | STY3150  | 100 | STY3123   | 67     | STY3150  | 98.2  | STY1480   |
| ATGGACA -  | STY3575  | 100 |           |        | STY3575  | 98.7  |           |
| ATGACCT +  | STY3599  | 100 | STY1851   | 62.745 | STY3599  | 98.9  | STY4479   |
| ATGATGC +  | STY3624  | 100 | STY2374   | 62.5   | STY3624  | 98.7  | STY2374   |
| ATGGCTA -  | STY3735  | 100 | STY4690   | 55.046 | STY3735  | 99.6  | STY4690   |
| ATGAGTT -  | STY3634  | 100 | STY0538   | 63.208 | STY3634  | 98.7  | STY0538   |
| ATGACCC -  | STY3742  | 100 | STY0922   | 60     | STY3742  | 99.1  | STY0922   |
| ATGACCA +  | STY2180  | 100 | STY1705   | 66.337 | STY2180  | 98.2  | STY1705   |
| ATGTTCC. + | STY2667  | 100 | STY2123   | 64     | STY2667  | 100   | STY2442   |
| ATGGCTG +  | STY0121  | 100 |           |        | STY0121  | 98.8  |           |
| ATGTCCA -  | STY3081  | 100 | HCM2.001: | 53     | STY3081  | 99.5  | HCM2.001: |
| ATGGCCG +  | STY3786  | 100 | STY0425   | 62.5   | STY3786  | 98.4  | STY0544   |
| ATGATTA +  | STY2285  | 100 | STY2752   | 61.765 | STY2285  | 98.9  | STY2752   |
| ATGTCGC -  | STY3629  | 100 | STY3421   | 66.019 | STY3629  | 98.6  | STY3421   |
| ATGGATC -  | STY3719  | 100 | STY0157   | 66     | STY3719  | 95.5  | STY4638   |
| ATGGCGA +  | STY0412  | 100 | STY1535   | 67.29  | STY0412  | 99.5  | STY2044   |
| GTGAGCA -  | STY2130  | 100 | STY4502   | 63.725 | STY2130  | 99.5  | STY0786   |
| ATGATAC +  | STY1924  | 100 | STY4200   | 78     | STY1924  | 98.3  | STY4200   |
| TTGCGTC +  | STY1440  | 100 |           |        | STY1440  | 81.43 |           |
| ATGAACC +  | STY1406  | 100 | STY4013   | 53.465 | STY1406  | 98.9  | STY4545   |
| ATGAAAA +  | STY0920  | 100 | STY0923   | 76     | STY0920  | 99.9  | STY0923   |
| ATGATGC -  | STY0668  | 100 | STY0072   | 68     | STY0668  | 99    | STY0072   |

|           |         |      |          |        |         |       |          |
|-----------|---------|------|----------|--------|---------|-------|----------|
| ATGCTTT - | STY0992 | 100  | STY2696  | 62.376 | STY0992 | 99.1  | STY2696  |
| ATGAAAA + | STY4020 | 100  | STY4875  | 89     | STY4020 | 98.7  | STY4875  |
| ATGAACC - | STY0646 | 100  | STY3759  | 67.961 | STY0646 | 98.7  | STY3759  |
| ATGAGCC + | STY1331 | 100  | STY2459  | 61     | STY1331 | 99.8  | STY2459  |
| CTGATGG + | STY1492 | 100  | STY3839  | 93     | STY3839 | 75.5  | STY1492  |
| GTGACGC - | STY1951 | 100  | STY2553  | 62.136 | STY1951 | 98.9  | STY3343  |
| ATGCACA + | STY1980 | 100  | STY1349  | 68.519 | STY1980 | 98.9  | STY1349  |
|           | STY2073 | 79   | STY2346  | 63.107 | STY2073 | 36.35 | STY2346  |
| ATGAAAA + | STY2105 | 100  | STY1681  | 52     | STY2105 | 98.3  | STY1681  |
| ATGCAAC + | STY0526 | 100  | STY0544  | 65.347 | STY0526 | 98.7  | STY1373  |
| ATGTTCC + | STY0572 | 100  | STY2973  | 59.615 | STY0572 | 98.6  | STY2973  |
| ATGGTTA + | STY0605 | 100  | STY4838  | 62.857 | STY0605 | 97.29 | STY4838  |
| ATGAGTT - | STY1490 | 100  | STY0717  | 59.406 | STY1490 | 98.8  | STY0717  |
| ATGCCGC - | STY2523 | 97   | STY2518  | 96     | STY2523 | 94.43 | STY2518  |
| ATGCCCC + | STY2891 | 100  | STY1309  | 79     | STY2891 | 98.1  | STY4172  |
| ATGTCTG + | STY4144 | 100  | STY3480  | 64.078 | STY4144 | 90    | STY3593  |
|           | STY0793 | 100  | STY0492  | 67.961 | STY0793 | 67.9  | STY3467  |
|           | STY4281 | 62.5 |          |        | STY4281 | 25.39 |          |
| ATGAATG - | STY3352 | 100  | STY2506  | 59.406 | STY3352 | 97.96 | STY2506  |
| ATGTCAT - | STY3157 | 100  | STY2649  | 64.423 | STY3157 | 99.2  | STY2590  |
| ATGAGCA - | STY3238 | 100  | STY3992  | 61.321 | STY3238 | 99.1  | STY3992  |
|           | STY0477 | 65   | STY0476  | 63     | STY0480 | 18.92 | STY0477  |
| ATGAACC - | STY2965 | 100  | STY4132  | 72     | STY2965 | 98.7  | STY4132  |
| ATGATTC - | STY4159 | 100  | STY0719  | 87     | STY4159 | 99.3  | STY3510  |
| ATGGATA + | STY4015 | 100  | STY2752  | 63.208 | STY4015 | 99.1  | STY0536  |
| GTGAATC - | STY3136 | 100  |          |        | STY3136 | 97.8  |          |
| ATGGTTA - | STY3178 | 100  | STY4459  | 87     | STY3178 | 94.12 | STY4459  |
| GTGGTAA + | STY3272 | 100  | STY2409  | 73.077 | STY3272 | 98.9  | STY2409  |
| ATGTCTG - | STY3316 | 100  | STY3033  | 68     | STY3316 | 99    | STY3033  |
| ATGACAG - | STY4626 | 100  | STY3676  | 94     | STY4626 | 96.5  | STY3676  |
| ATGATTG - | STY2393 | 100  | STY1573  | 77     | STY2393 | 99.5  | STY1573  |
| ATGGCGC - | STY1949 | 100  | STY1545  | 52.83  | STY1949 | 99.1  | STY1545  |
| ATGGCGA + | STY4370 | 100  | STY0639  | 63.366 | STY4370 | 100   | STY0639  |
| ATGAAAG - | STY4261 | 100  |          |        | STY4261 | 98.4  |          |
| ATGGCGA - | STY3474 | 100  | STY3766  | 61.321 | STY3474 | 98.7  | STY3766  |
| ATGCGTG - | STY3387 | 100  | STY0237  | 66.337 | STY3387 | 98.3  | STY1376  |
| ATGAACA - | STY4263 | 100  | STY1741  | 78     | STY4263 | 97.1  | STY1741  |
| ATGTTTA - | STY3489 | 100  | STY1000  | 59.048 | STY3489 | 99.4  | STY1000  |
| ATGAAAT + | STY4862 | 100  | STY0996  | 64.762 | STY4862 | 99    | STY0996  |
| ATGGCTC - | STY4682 | 100  | STY2943  | 62.136 | STY4682 | 98.5  | STY2469  |
| ATGTTAT + | STY0406 | 100  |          |        | STY0406 | 99    |          |
| ATGAAAG + | STY2372 | 100  | STY2553  | 59.223 | STY2372 | 98.9  | STY2553  |
| ATGGTTT + | STY2957 | 100  | STY2546  | 60     | STY2957 | 99.2  | STY2546  |
| ATGACTC + | STY2384 | 100  | STY0585  | 68     | STY2384 | 95.02 | STY0585  |
| GTGACCA - | STY2458 | 100  | STY3936  | 75     | STY2458 | 99.2  | STY3936  |
| GCAGCTT - | STY2469 | 100  | STY2470  | 100    | STY2469 | 51.73 | STY2470  |
| ATGCTGA - | STY2398 | 100  | HCM1.270 | 54     | STY2398 | 99.1  | HCM1.270 |
| ATGACAA + | STY0280 | 100  | STY1765  | 62.136 | STY0280 | 98.87 | STY0644  |
| ATGTTTG - | STY1713 | 99   |          |        | STY1713 | 96.9  |          |
| ATGGTAA + | STY0776 | 100  | STY4682  | 62.037 | STY0776 | 99.1  | STY4682  |
| ATGAGCC + | STY0845 | 100  | STY1378  | 47     | STY0845 | 42.06 | STY0647  |

|           |         |        |          |        |         |       |          |
|-----------|---------|--------|----------|--------|---------|-------|----------|
| ATGCCCG + | STY2865 | 100    | STY0554  | 63.107 | STY2865 | 91    | STY0554  |
| ATGCTGA + | STY3454 | 100    | STY3131  | 65.741 | STY3454 | 87.08 | STY3131  |
| ATGCTTA + | STY3407 | 100    | STY3109  | 60.952 | STY3407 | 99.2  | STY3109  |
| ATGCGAT + | STY0890 | 100    | STY4170  | 74     | STY0890 | 98.7  | STY4170  |
| ATGTGGA + | STY1736 | 100    | STY0660  | 67.961 | STY1736 | 99.2  | STY4477  |
| ATGGGAC + | STY3413 | 100    | STY4768  | 66.355 | STY3413 | 98.9  | STY1958  |
| ATGCTTC + | STY3328 | 100    | STY3836  | 58.716 | STY3328 | 98.3  | STY3836  |
| ATGAACA + | STY3201 | 100    | STY0732  | 65     | STY3201 | 89.61 | STY0732  |
| ATGAATT + | STY0801 | 100    | STY2857  | 81.188 | STY0801 | 99.1  | STY1763  |
| ATGTCCA + | STY1222 | 100    | STY2810  | 64.151 | STY1222 | 99.4  | STY2810  |
| ATGATGC - | STY2124 | 100    |          |        | STY2124 | 99.5  |          |
| ATGAGCC + | STY3298 | 100    | STY1467  | 70     | STY3298 | 99.2  | STY1467  |
| ATGGCGA + | STY1149 | 100    | STY0064  | 88     | STY1149 | 98.9  | STY2595  |
| ATGCAAC + | STY0795 | 100    | STY4235  | 63.81  | STY0795 | 99.4  | STY4235  |
| ATGGCGC + | STY0829 | 100    | STY0289  | 60.194 | STY0829 | 98.4  | STY2948  |
| ATGATCT + | STY0643 | 100    | STY1757  | 72     | STY0643 | 98.1  | STY1757  |
| ATGGGAC - | STY2783 | 100    |          |        | STY2783 | 100   |          |
| ATGGCGA + | STY2719 | 100    | STY0519  | 88     | STY2719 | 98.9  | STY3570  |
| ATGCTGA - | STY2947 | 100    | STY4366  | 33     | STY2947 | 100   | STY4366  |
|           | STY0310 | 64.423 | STY4050  | 60.748 | STY4050 | 27.3  | STY0310  |
|           | STY1591 | 63.208 | STY1787  | 61     | STY1591 | 57.62 | STY1670  |
| ATGGCAC - | STY4051 | 100    | STY4713  | 61.765 | STY4051 | 100   | STY4713  |
| ATGAAAG - | STY4110 | 100    |          |        | STY4110 | 97.63 |          |
| ATGGCGT - | STY4448 | 100    |          |        | STY4448 | 96.2  |          |
|           | STY1631 | 75     | STY4180  | 63.81  | STY1631 | 64.78 | STY4180  |
| ATGAATG - | STY2367 | 99     | STY3980  | 59.434 | STY2367 | 92.35 | HCM1.262 |
|           | STY3664 | 93     | STY4640  | 92     | STY3664 | 84.8  | STY4640  |
| ATGTATA + | STY4179 | 100    |          |        | STY4179 | 100   |          |
| ATGGCTA + | STY0297 | 100    |          |        | STY0297 | 99.4  |          |
|           | STY3153 | 67     | STY0640  | 66.337 | STY0640 | 14.65 | STY3153  |
| ATGGATG + | STY0611 | 100    | STY0697  | 72.727 | STY0611 | 97.95 | STY0823  |
|           | STY4820 | 61.468 | STY2590  | 48.515 | STY4820 | 21.93 | STY2590  |
| ATGACAA + | STY1497 | 100    | STY4807  | 63.366 | STY1497 | 99.5  | STY4807  |
| TTGCAGC + | STY0053 | 100    |          |        | STY0053 | 100   |          |
|           | STY2954 | 63.107 | STY3986  | 53.465 | STY2954 | 7.36  | STY3986  |
| ATGAAAA + | STY3958 | 100    |          |        | STY3958 | 99    |          |
|           | STY4871 | 84     | STY2297  | 61.165 | STY2058 | 34.2  | STY4871  |
| ATGGCTT - | STY2788 | 100    | HCM1.153 | 59     | STY2788 | 99.5  | HCM1.153 |
| GTGCTCG + | STY3449 | 100    | STY0107  | 62.857 | STY3449 | 99.3  | STY0355  |
|           | STY1738 | 62.136 | STY4256  | 61.905 | STY1738 | 35.25 | STY1181  |
| GTGAAAA + | STY0908 | 100    | STY4925  | 64.762 | STY0908 | 99.4  | STY1959  |
| ATGGAAA - | STY0940 | 100    | STY2204  | 71     | STY0940 | 100   | STY2204  |
| ATGAGCA - | STY1012 | 100    | STY4664  | 56.731 | STY1012 | 100   | STY4664  |
| ATGCGCA + | STY0839 | 100    | STY1270  | 63.551 | STY0839 | 98.8  | STY1270  |
|           | STY0862 | 51     |          |        | STY0862 | 22.96 |          |
|           | STY0717 | 62.136 | STY4587  | 61.765 | STY0717 | 14.78 | STY4587  |
|           | STY4308 | 65.741 | STY0376  | 63.208 | STY4308 | 11.91 | STY0376  |
|           | STY4771 | 60     | STY0875  | 59.406 | STY4771 | 28.13 | STY0875  |
|           | STY3175 | 67.327 | STY0335  | 62.5   | STY3175 | 26.58 | STY0592  |
|           | STY3743 | 58.824 | STY0958  | 56.731 | STY0958 | 39.02 | STY3743  |

|           |         |        |          |        |         |       |         |
|-----------|---------|--------|----------|--------|---------|-------|---------|
|           | STY2159 | 100    | STY0924  | 70     | STY2159 | 98.3  | STY0924 |
|           | STY0070 | 100    | STY0670  | 78     | STY0070 | 96.8  | STY0670 |
|           | STY0231 | 100    | STY3528  | 70     | STY0231 | 99.7  | STY3528 |
|           | STY0494 | 54.902 | STY3715  | 53.704 | STY3715 | 17.79 | STY0494 |
|           | STY0979 | 100    | STY3237  | 72     | STY0979 | 98.1  | STY3237 |
|           | STY0336 | 55     |          |        | STY0336 | 6.26  |         |
|           | STY3052 | 61.765 | STY0724  | 60.194 | STY0490 | 12.9  | STY4276 |
|           | STY0659 | 34     |          |        | STY0659 | 22.23 |         |
| ATGAAAA - | STY3343 | 100    | STY1951  | 60.185 | STY3343 | 100   | STY1951 |
| ATGTTTG + | STY3662 | 100    | STY4642  | 88     | STY3662 | 100   | STY4642 |
| TTGGAAC + | STY2629 | 100    | STY4838  | 64.815 | STY2629 | 100   | STY4838 |
| ATGGTCA - | STY3844 | 100    |          |        | STY3844 | 100   |         |
| ATGCCGC - | STY1359 | 100    | STY1028  | 90     | STY1359 | 100   | STY1028 |
| ATGAACC - | STY1597 | 100    | STY3473  | 91     | STY1597 | 100   | STY3473 |
| ATGGCAC - | STY2167 | 100    | STY1911  | 62.963 | STY2167 | 100   | STY1911 |
| ATGACAT - | STY2358 | 100    | STY1648  | 87     | STY2358 | 100   | STY1648 |
|           | STY2887 | 100    | STY3697  | 100    | STY2887 | 100   | STY3697 |
| GTGACGC - | STY4039 | 100    | STY0919  | 71.287 | STY4039 | 100   | STY0919 |
| ATGAGCC - | STY1591 | 100    | STY0954  | 64     | STY1591 | 100   | STY2672 |
| ATGAAAA + | STY1608 | 100    | STY3896  | 59.459 | STY1608 | 100   | STY3896 |
| GTGTGCA - | STY2362 | 100    | STY0523  | 53.535 | STY2362 | 100   | STY0523 |
| ATGGAGC - | STY2880 | 100    | STY2879  | 32     | STY2880 | 100   | STY2879 |
| TTGATAA - | STY3068 | 100    |          |        | STY3068 | 100   |         |
| ATGCAGA + | STY0301 | 100    | STY0084  | 55     | STY0301 | 100   | STY0084 |
| GTGAGTC + | STY0347 | 100    | STY1757  | 62.136 | STY0347 | 100   | STY1757 |
| ATGAGCA - | STY1015 | 100    | STY2764  | 61.165 | STY1015 | 100   | STY2764 |
| ATGATGA - | STY3763 | 100    | STY3762  | 74     | STY3763 | 100   | STY4443 |
| ATGAAAG - | STY4107 | 100    | STY0367  | 60.185 | STY4107 | 100   | STY0367 |
|           | STY4338 | 100    | STY1658  | 60     | STY4338 | 100   | STY0710 |
| ATGCGTC + | STY4530 | 100    | STY1816  | 73     | STY4530 | 100   | STY1816 |
| TTGTTCT(+ | STY4564 | 100    | STY2992  | 57     | STY4564 | 100   | STY2992 |
| ATGTGTA - | STY4582 | 100    | STY4838  | 60     | STY4582 | 100   | STY4838 |
| ATGCCGC + | STY4706 | 100    |          |        | STY4706 | 100   |         |
| ATGGCAG + | STY4586 | 100    | STY4676  | 63     | STY4586 | 100   | STY4676 |
| ATGAGAT + | STY4162 | 100    | STY4786  | 68     | STY4162 | 100   | STY4786 |
| GTGAATG - | STY4415 | 100    | STY3368  | 65.094 | STY4415 | 100   | STY3368 |
| ATGGGCT + | STY4540 | 100    | STY4541a | 73     | STY4540 | 100   | STY1816 |
| ATGACCA + | STY4755 | 100    | STY4756  | 69     | STY4755 | 100   | STY4756 |

%ID          E. coli B number

20.81 b1937

15.68 b3017

17.91

18.54 b0047

16.18 b0104

8.15 b0090

60.88

21.85 b0142

10.69 b0168

40.88 b0199

13.16

24.84 b0679

b0710

29.67 b4242

9.42

53.96

8.95 b0931

4.43 b3705

21.13 b3734

3.75

9.99

10.99

44.15

34.34

6.37

18.17 b1067

17.07 b3413

16.75 b3464

3.28 b3418

29.13 b3428

32.26 b3466

76.99

19.13 b3452

9.37 b4365

47.02

19.91

22.98

8.19  
8.09  
6.29 b2730  
13.74 b2744  
6.5 b0859  
20.96  
11.93

47.82 b2468  
16.61  
6.49 b0913

7.03 b1516  
2.68 b3956  
15.19  
22.11 b0854  
5.25  
13.69 b2515

8.22 b0892  
12.06  
57.59  
12.75 b2217  
19.66 b4330  
21.5  
10.03 b2299  
13.07 b1922  
8.19  
8.23 b1065  
41.59  
24.85 b4186  
32.52  
16.49 b1635  
36.71 b1957  
12.86 b2014  
14.03 b2249  
12.12 b2288  
36.56

7.24  
13.26 b2320  
8.97  
b1603  
b0237  
43.38  
8.75  
11.7  
64.37 b1748  
3.63 b1713

15.28 b2103  
13.51 b1609

9.09  
5.57  
14.3 b0172  
11.91 b1951  
15.09 b2379  
16.07 b2277  
3.65 b1702  
22.54  
49.38  
10.38 b0491  
14.82 b3866  
7.51 b4160  
9.28  
32.37 b3033  
10.88 b3451  
5.05 b3172  
29.99 b2302  
50.91  
14.42 b4206  
55.28 b4264  
45.87 b2663  
5.92 b4327  
37.83

b3131

2.93 b3942  
10.71 b1812  
22.61  
7.06 b3886  
28.33  
6.41 b3288  
32.96  
15.62 b3963  
6.45  
17.9 b0721  
6.13 b0907  
7.79  
25.82 b3366  
12.36 b3993  
73.37 b3458  
26.08

28.47 b1071  
11.45 b3253  
53.42  
37.97  
21.22

b3880

95  
43.7

5.15  
79.2 b4122  
10.85 b1897  
35.52 b2502  
27.98 b4060  
9.62 b2603  
35.96  
18.68 b3673  
18.06 b3833  
11.52  
9.47  
10.22 b2347  
23.52 b1174  
b1253  
31.17 b2808  
10.44  
8.15  
20.34 b0578  
13.61 b3931  
13.21  
5.98 b3821  
8.13 b3793

49.37  
b2790  
15.29  
21.89 b3838  
41.24 b0506  
31.84  
8.37  
40.31  
47.5  
5.3  
12.69 b1439  
20.58  
45.25  
9.23 b1860  
20.64 b0478

20.14  
6.11 b0600  
13.18 b0594  
55.04  
b1238

15.42 b1413  
8.18  
21.16  
20.32  
15.82  
11.03  
10.92



21.14 b0447  
b2948  
b3603  
10.92 b3685  
b2819  
18.99  
22.04  
17.3 b3525

b3590  
10.92 b3638  
46.46  
10.99 b0696  
31.7  
13.33 b2684  
24.75 b2078  
4.2 b2177  
b2044  
35.59 b2131  
33.42

33.12  
5.71 b0869  
b3549  
43.89  
17.58 b3576  
16.43 b3472  
10.9 b3225  
8.57 b3109  
10.75  
24.16 b2724  
9.57 b3055  
17.21  
16.21  
4.64  
10.34 b0817  
32.4  
15.31 b0755  
39.31 b0793  
12.22  
16.7 b3198  
23.92 b1942  
22.02 b2989

26.91

b0427  
33.78  
71.1  
38.16  
54.79

53.78  
b0580  
42.21  
29.81  
23.86  
23.15 b2236  
12.26 b2998  
17.96  
21.81 b0607

15.48 b3616  
15.87  
55.48 b3686  
34.63 b3688

55.55  
65.93

37.22  
27.58  
49.28 b1622  
58.5 b0802  
30.47  
14.45  
b2304  
21.44  
14.67

18.59  
11.94  
21.93

2.44  
16.74  
9.51  
67.7 b2309  
62.62 b2406  
70.93 b2465  
66.34 b2470  
20.55

20.84

17.84  
79.71  
59.49  
22.95 b0739  
55.07

72.1  
6.26  
24

19.86

88.1

39.95

13.38

15.33

47.77

65.57

69.3

33.47

33.6

38.22

9.03

81.9

15.66

20.89

25.48

4.39

14.4

70.5

74.05

13.62

5.58 b3689

12.97 b3697

21.36 b3725

15.39 b3669

15.45 b3184

58.14 b3223

19.91 b3200

26.36

13.72

60.98

7.23 b0677

11.4 b0697

11.6 b1533

20.71

38.78 b3704

9.63

13.52 b0013

15.05

13.99 b2573

47.2 b3752

22.97

59.41 b0084

3.2

b3262

35.52

b3343

11.8 b1099

4.26 b1128

61.9 b1795

5.19 b2046  
6.86 b3391  
9.05 b1134

37.21 b2049  
25.51

48.69 b1779  
7.39 b2067  
24.46 b0009  
26.28

2.04  
31.77 b4074  
9.65  
b2389  
18.26 b2433  
13.17  
21.13

34.53  
25.11  
10.51  
50.94  
54.89 b2726  
15.56  
4.67  
65.41 b2464  
10.8 b0888  
8.94 b0918  
3.13 b0905  
9.45  
32.67 b4217  
43.49 b2240  
25.63  
b1890  
25.2  
5.62 b1118  
b1662  
16.98 b1135  
12.43  
6.47 b1955  
19.78 b1724  
7.57 b4179  
13.26 b4211

14.07  
65.51  
16.67  
5.15  
20.29

8.59 b1891  
83.7  
22.73 b2459  
26.57 b2587  
15.91  
16.26  
31.54 b4024  
4.68 b2688  
7.37  
19.78 b1948

18.7 b1879

19.34 b3748  
10 b0170  
26.46 b0384  
16.09 b4022  
5.66  
8.68 b1741  
3.66  
6.45 b1623  
28.52  
15.31  
b0529  
14.85  
12.62 b4379  
12.66 b3609  
16.99 b3412  
9.64  
21.55 b1213  
9.57 b0503

14.25  
b4210  
7.27  
14.07  
24.88 b3058  
b3429  
41.14 b3646  
14.78  
33.72 b1101  
13.95 b3865  
10.72  
9.9 b0781

7.29 b2437  
11.67  
21.7 b0637  
6.7  
18.9 b2021  
41.93 b1290  
22.39 b0385

48.53

30.21 b0660  
b4108

8.37 b1875  
18.6

12.48  
70.4

4.39 b3733

36.76

3.86 b0789  
b0413

15.42 b3908  
5.49

18.83 b1304

14.29 b2614

11.34 b3303

10.05 b3632

12.45 b3850

6.86 b2569

27.38

5.47 b3783  
b1946

23

5.79 b2329

7.28 b2284

15.78 b3642

89

19.7

10.75 b3903

37.24 b3836

30.36 b3019

4.78 b2393

35.04 b3767

68.58 b0061

13.82

51.27

19.56

59.09 b0514

96.9

18.41

3.65 b1274

14.17

9.67 b1804

13.33 b1380

10.63

14.83 b1861

30.97 b0523

22.23

b1344  
9.8  
25.34  
21.57 b1219  
6.78 b1433  
19.29  
12.59 b1863  
3.02  
12.94 b2812  
30.75  
10.11  
13.13  
36.38 b3780  
7.46 b3565  
32.97  
8.92 b2794  
16.15 b2619  
4.55 b2903  
9.46 b2957  
6.57 b3967  
11.42 b2960  
32.58  
25.1 b2171  
43.05 b2667  
45.41 b1303  
22.87 b2889  
b0328  
9.14  
8.53 b2158  
17.48  
5.27 b2126  
20.23 b2154  
b2050  
19.57 b2130  
b3605  
19.13 b3320  
17.36 b4169  
13.62 b3313  
30.71  
12.43 b4190  
12.3  
7.05 b4146  
30.28 b2123  
b0657  
20.4 b2944  
5.97 b0962  
9.9 b0763  
6.91 b0830  
10.53 b3205  
7.28 b0772  
b0807  
31.76 b2904

57.34 b0214  
8.17 b3087  
17.77  
15.65 b0796  
50.01 b0842  
32.34  
22.61

19.04  
87.04  
39.6  
b4026

b4012  
17.86

29.98  
25.74  
33.68 b3165  
18.74 b2897  
31.06  
20.84 b1447

14.89  
48.95 b3267  
19.37 b0044  
34.62 b1586  
70.32 b2553  
33.25  
30.04  
18.66  
24.94 b2495  
18.68 b2525  
3.54  
13.16 b0631  
b2258

13.46  
19.48  
6.23  
23.1  
50.69  
24.41

31.24

11.1  
42.46 b0463  
12.52 b0484  
18.66  
47.93  
28.07  
41.87 b1113



11.51  
18.07  
12.39  
34.18  
56.45  
6.48  
24.85  
67.62  
46.05  
95.7  
100

20.15  
55.03  
100  
6.45  
13.59  
9.64  
15.35  
41.62  
5.25  
19.16  
10.12  
23.81  
15.25  
5.67  
9.37

13.57  
35.81  
1.85  
85.82

5.95  
12.58  
26.28 b2891  
7.26  
15.64  
54.57  
b0085  
3.61 b0118  
8.89

8.73 b0152  
69.08 b0186  
35.18  
28.3  
18.68 b0687  
11.75 b1929  
15.46 b3620

b1262

24.54 b3724

12.77 b2961

16.17 b3194

21.61 b3233

47.04 b0627

37.54 b1050

32.41 b3400

17.55

12.1 b3439

b4359

b1102

17.22 b3448

11.51 b4363

8.02 b4395

22.83

18.78 b3469

4.6

5.85

9.07

14.38

3.36

33.08 b4050

20.93 b4116

11.08 b0845

18.45

12.46 b2467

44.68 b2435

11.06 b0872

8.35 b0899

2.9 b0924

2.68

14.84 b3933

16.99

39.32 b4154

18.55 b2405

5.04

8.03 b2521

19.7 b2560

58.97 b4130

9.04 b4161

9.27

20.55 b2276

8.02

9.07 b1096

23.18

97.8 b3339

53.9 b1594

5.58  
6.4 b1645  
32.72 b4207  
13.4 b0076  
41.16  
13.58  
6.25  
4.65  
6.18  
6.08  
2.44

13.2 b1088  
46.82 b1708  
b0969  
11.84  
8.22 b0185  
10.06  
14.86 b0115  
12.79

4.87  
22.94 b1626  
15.92 b1596  
8.17 b4034  
15.06  
7.85 b0378  
3.24 b0408  
9.05 b0086  
21.71  
53.19

b1683  
27.08 b3455  
21.39 b0449  
60.81 b0576  
17.17  
7.54  
18.51 b2578  
13.22 b3548  
17.93 b3159  
35.49 b2248  
10.84 b2527  
18.92  
7.56 b4232  
55.64

11.48 b4367  
b3617  
9.8 b3534  
12.83 b3152  
9.11 b2239  
50.23 b2234

36.58  
30.8 b3921  
15.08  
23.64 b0727  
44.86 b3868  
18.32 b3360  
10.48 b3863  
16.01 b0853  
33.99 b3352  
56.1 b4062  
12.49 b2565  
3.65 b1845  
10.26  
8.04 b3875  
3.12 b1663  
16.21  
99.8  
13.95 b2593  
37.14 b0030  
11.67  
47.39  
24.02  
2.72  
29.08  
31.19  
15.23 b4073  
8.2 b1870  
35.25  
14.99 b0010  
76.1  
6.75 b0020  
5.24 b3785  
48.68 b3826  
11.58 b3804  
45.66 b2927  
b1234  
17.46  
23.43 b2842  
63.54  
47.16 b2811  
15.31  
3.66 b2795  
16.11  
6.51 b3829  
18.41 b3811  
9.86 b3786  
b3973  
3.69 b2822  
54.09 b1247  
13.51 b3919  
19.64 b0469

17.83 b0584  
11.4 b0906  
5.22

9 b1452

7.28 b1333

7.19

37.18  
26.88  
45.25  
12.47  
11.75 b1256  
27.49  
16.61  
44.21

b1321  
20.99 b2785  
57.35 b2832

11.48 b2950  
12.05 b0436  
13.82 b3475

55.48  
27.01 b3024  
4.1 b2840

17.84  
46.54  
b3572

15.67  
5.14 b3655  
2.32  
18.26 b2725  
8.2

11.04 b2727  
48.39 b2142  
37.22  
19.13  
98.9

21.73 b2179  
12.98 b2101  
11.28 b1829  
28.79 b3298  
45.23 b3495

17.27 b3228  
b3526  
53.34 b3415  
14.96

16.52 b3031  
43.34 b2707  
15.59 b2146  
62.1 b3009  
34.1  
40.68 b0723  
8.45 b0780

16.21 b1074  
20.23 b0774

b3220

24.71 b3038  
5.99  
41.42 b0814  
14.85 b4194

18.63 b0396  
8.78 b4349  
16.76 b0442  
29.96  
40.01  
49.98  
42.06  
11.69  
8.72 b2793  
27.39  
30.93

56.59 b2990  
22.85  
8.7 b1530  
34.48 b3676  
5.14 b3652  
23.97 b3537  
16.78 b3670  
14.64  
61.65 b1686

59.57  
45.44

48.44

32.57 b3190  
35.78  
61.04  
44.42

23.89

58.93  
44.01  
24.14  
19.51  
9.28  
40.06  
31.26 b2306  
69.05 b2310  
61.73 b2464  
20.15 b2468

22.16  
27.9  
18.77 b0528  
36.22  
78.9  
79.71  
2.87 b0374  
32.34  
73.5  
69.3  
37.23  
28.43  
33.19  
14.94  
86.4  
86.4  
3.08  
10.42  
25.32  
72.1  
10.73  
15.17  
100  
78.51  
25.7  
4.87 b4016  
19.51  
32.3  
32.21  
b4330  
29.62  
25.2  
77.97  
100  
45.82  
6.48  
14.49  
12.32 b3706  
b3738  
10.24  
47.55 b3195

15.49 b3229  
10.55 b3251  
59.44  
8.99  
11.26 b0683  
50.45 b0995  
62.31  
9.96  
10.78 b3711  
b3747  
10.19  
b0759  
13.27

19.08  
21.86 b0101  
b0126  
12.65 b0163  
2.58 b3285  
24.92  
4.97 b1109  
36.77  
14.61 b1782  
3.09 b2060  
55.5 b1112

21.41 b1781  
41.44 b2063  
37.64 b4403

13.03 b2053  
5.85 b2081  
20.35  
71.69  
4.56  
b0948  
6.27 b3962  
53.7 b2739  
18.13 b2331  
39.38 b2409  
6.87  
10.37 b2518

b2507  
21.08 b2531  
32.98  
52.24  
12.86  
20.46  
3.78  
33.97



11.28 b2475  
52.19  
8.4  
10.07 b0921  
12.54 b1919  
13.73 b2023  
4.96 b2292  
26.28  
12.6 b1798  
25.37  
5.13 b1722  
43.01 b0335  
b1732  
5.42 b4166  
43.87  
53.63  
27.68 b4188  
6.8  
8.89 b2232  
10.61  
42.24  
8.68 b2254  
13.1 b2291  
38.76  
15.08  
23.12  
16.42 b0331  
38.94 b2582  
13.53 b0390  
11.66  
10.3 b2300  
22.63 b2253  
14.35 b4030  
46.96 b1678  
5.91  
14.07 b2213  
14.61  
b2563  
12.88 b0120  
b2009  
9.2 b0110  
10.43  
6.03 b1719  
3.8 b0423  
11.24 b1605  
26.08 b0481  
7.13 b0482  
10.32 b0592  
3.39 b4258  
49.3 b4401  
38.32  
10.58 b3651

11.28  
62.61 b2406  
5.09  
11.47  
56.81

14.51 b2575  
18.24  
6.62 b3487  
19.75  
23.15  
11.81  
60.17 b2457  
b3910  
36.26 b0651  
40.5 b0699  
11.93  
12.36  
14.65 b0766  
42.36  
16.55  
8.69 b1076  
26.68 b1211  
4 b1896  
37.66  
28.81 b3736  
19.61 b1651  
40.23 b1918  
18.94  
b2571  
14.21 b0720  
5.98 b1129  
10.5 b4005  
5.54 b3168  
7.98  
7.65 b4239

11.96 b1092  
50.44 b1283  
10.28  
b3630  
2.04  
24.9  
8.98 b3844  
14.96 b2606  
21.71 b3791  
10.69  
5.89 b1080  
6.09  
11.79 b2828  
2.98  
14.5

18.98 b3893  
56.97 b0809  
26.51 b3845  
12.52 b1880  
9 b0926  
73.47 b3583  
7.06 b0130  
23.31 b0605  
60.1 b2837  
34.22  
28.67 b1859  
1.86  
75.41 b1467  
68.99 b1465  
9.53  
3.28  
11.44 b1192  
21.17 b1832  
9.02 b1857  
12.31 b1330  
58.13  
19.84  
6.58  
39.15 b0589  
25.63  
47.7  
  
59.4  
10.43  
b1852  
  
30.44  
11.4  
b2926  
14.77  
36  
16.34 b2702  
39.87  
27.52  
21.71 b2804  
50.56  
10.71 b0386  
11.44  
14.36 b2830  
30.94  
35.78 b1582  
21.24 b3773  
51.81 b2708  
11.81  
6.59  
24.59 b2698  
60.48 b2151

10.2 b2186  
8.73 b2086  
5.59 b2138  
51.94 b2167  
18.5 b2098  
4.61  
20.51 b3577  
b0866  
11.56 b4180  
22.28 b3345  
7.47 b4173  
26.18 b3161  
19.26 b4393  
18.27 b2690  
14.77 b2174  
21.19 b2963  
13.96 b2912  
10.46 b0750  
4.7  
13.51 b2892  
b3150  
21.73 b0785  
8.43 b0835  
11.97  
b3100  
8.5  
12.23  
4.11 b0823  
25.49 b0379  
33.45 b0435  
2.19  
52.09  
14.25  
37.56  
20.13  
17.48  
33.54 b4151  
9.59  
14.99 b1208  
82.2  
17.27 b2051  
  
14.67 b3185  
17.37 b2962  
8.9  
47.42 b1854  
33.42 b1383  
61.3 b3238  
b2007  
22.91

59.04

28.99 b2325

30.63 b2377

24.69

b0630

20.24 b0682

12.14 b2315

18.78

14.38

6.94

9.49

39.06

16.44

37.95

73.45

55.75

36.23

38.43

55.42 b0584

66.83

2.37

17.62

35.57

4.09

78.9

17.38

11.66

88.2

18.02

61

28.25

8.85 b1629

100

86.6

100

28.03

7.24

83.3

59.31

27.01

20.82

28.95

71.6

7.16

29.75

57.69

59.34  
42.4  
11.47  
30.1 b4074  
3.24  
23.16  
52.68  
30.48 b0127  
b0182  
23.78 b1539  
56.29 b4113  
15.95  
b3739  
26.9 b3261  
18.23  
18.71  
65.18  
8.64 b3187  
12.72  
41.93 b0058  
2.62 b0114  
10.73  
7.4  
17.05 b0191  
51.24 b1525  
4.45 b0642

13.35  
10.98  
76.86  
43.24  
6.64 b4377  
40.48  
16.47  
28  
8.58  
3.1 b4143  
10.23 b0224  
12.8  
17.3 b0966  
16.55 b1013  
10.59 b1056  
30.29 b1103  
47.41  
36.8 b3280  
40.21  
8.08 b3396

51.59 b3436  
60.28  
9.11  
13.35 b1514

9.9  
26.64 b2731  
8.52 b2737  
43.76 b3945  
13.39 b2722  
33.92  
10.96  
26.85 b2398  
20.36 b2469  
13.03  
12.83 b3925  
46.63  
16.74 b4093

14.04 b2407  
19.29  
8.02 b1602  
20.7  
47.98  
13.24 b4183  
4.49 b4220  
6.99 b4233  
24.13

49.56 b4337  
4.34  
16.07 b1718  
41.75  
6.15  
10.98  
21.22 b1051  
b1787  
6.22  
b1059  
9.9 b1767  
33.31  
b1739

16.59  
12.42 b1637  
52.48 b1680  
4.75 b1069  
21.73  
b3740  
43.58 b2579  
6.93 b0188  
5.26 b0403  
14.93 b4020  
3.75 b4067  
b1745  
6.82 b1706  
10.85 b1647  
10.28

28.1 b2041  
11.33  
41.33 b0157  
9.63 b0042  
b0111  
5.69 b3527  
43.88 b3423  
b2260  
8.85 b2512  
47.67  
18.98  
13.89 b4387  
47.3 b3573  
4.21  
11.2 b3397  
24.68 b2246  
12 b2497  
39.28 b2296  
60.6  
38.29 b0521  
17.05 b4218  
12.96  
b3028  
39.34  
21.89 b2169  
61.54 b2235  
b2439  
11.16  
14.28 b0685  
7.42  
  
6.96 b3859  
18.92 b0836  
9.04 b3355  
44.74 b4018  
35.56  
11.99 b3296  
29.33 b2144  
8.95  
6.27 b4003  
11.49  
28.83 b2829  
42.4  
5.44  
b3239  
56.15  
12.6  
22.2 b0027  
18.94  
  
64.87 b3877  
6.99 b2392



48.91 b2149  
2.19 b1687  
76 b1225  
10.01 b1194  
9.14  
28.13 b2789  
24.35 b2834  
6.64 b3847  
8.54 b3433  
7.77 b0053  
26.87 b3788  
7.15 b3770  
58.83 b1236  
1.96 b3987  
32.92  
4.94 b0063  
38.24 b1244  
3.52 b2132  
40.01  
8.66 b0595  
b1278  
14.87 b1233  
25.26  
28.98 b1424  
33.42

11.63 b0476  
61.76  
53.26 b3657  
10.23 b1464  
10.13 b1272  
11.26 b1431  
15.76

14.39  
9.03 b1849  
5.1  
6.07 b1280  
14.52 b2610  
10.27  
29.66  
14.97  
47.46  
19.06  
23.99  
12.78 b3599  
20.67  
b2802  
8.94  
5.38  
51.24 b3519  
16.15 b2955

37.52 b3604  
20.55  
4.4  
49.29 b2127  
6.04  
20.05 b2058  
22.65 b2136  
14.7 b3284  
37.2 b3521  
11.91 b1181  
17.09 b3553

20.65 b3208  
14.47 b4262  
11.03 b4135  
b3191  
29.48 b3117  
47.88 b2993  
24.55 b2705  
29.74  
11.24  
50.6  
23.43  
27.46 b2168  
21.72 b3283  
13.02 b3314  
18.41  
12.11 b0851  
b3050  
46.04 b2943  
21.82 b0965  
19.15 b0783  
37.87 b0831  
3.32  
19.12 b0737  
12.28 b0775  
8.09 b0821  
37.81 b3213  
6.77  
42.15 b2597  
10.91 b2340  
25.94 b4045  
10.34 b3295  
48.94 b1294  
70.32 b0450  
32.11  
10.97  
38.67 b3975  
13.8  
22.52  
66.1  
90.7

29.73 b1848  
46.67  
15.36  
30.85 b3928  
19.18 b2748  
75.81  
18.41 b1685  
23.19 b1639  
64.1  
25.48 b2456  
25.76 b0119

16.11  
16.94 b1820  
28.37 b1841  
20.72  
46.25

11.78  
27.36  
14.98  
17.78

14.97

51.93  
15.29  
60.2

29.71  
40.68 b2579

13.12  
86.07  
9.27  
6.4  
7.32  
22.71  
74.42  
100

32.39 b1580  
28.03  
7.4  
89.4  
31.34  
21.59

90  
100  
11.86  
9.46  
4.07  
10.21  
  
26.73  
  
5.75  
24.85  
10.2 b3560  
17.2  
10.28  
15.5  
87.4  
56.81  
34.27  
23.77 b3248  
11.67  
7.23  
10.61 b0997  
46.87  
26.03  
10.59  
5.55 b3728  
15.59 b3666  
5.59 b0045  
13.02 b0091  
30.1  
b0082  
25.89 b3231  
5.56 b3256  
12.12  
17.76 b0655  
8.88 b0688  
b0180  
57.82 b1541  
60.01 b2042  
14.31 b2069  
50.24 b0207  
34.43  
48.43 b2077  
89  
23.96  
4.87  
12.09 b2665  
  
5.59  
10.88

45.33 b3299  
15.5  
8

9.86  
b1060  
20.51 b1105  
3.91  
21.74 b1789

9.59  
9.79  
8.81 b4051  
13.57 b4076  
9.3 b2745  
15.96 b4027  
42.32  
60.4  
14.31 b2323  
38.21  
12.64  
10.52 b3891  
4.5  
5.62 b4041  
48.55

6.26  
9.24  
25.94 b2458  
b1131  
9.56 b1655  
15.13  
26.09 b2203

53.65  
12.59 b2281  
12.87 b2301  
14.73 b1921  
23.23  
45.13 b1895  
7.05 b1744  
b1638  
14.91  
49.21  
40.85 b1634  
4.14  
32.83  
8.93 b1632  
52.22 b1658  
17.05 b1682  
46.34  
19.41 b1652

26.84 b1600  
8.31  
19.4  
17.82 b2580  
35.91 b0399  
30.63 b0197  
18.3  
24.32  
12.7 b1916  
17.41 b1323  
19.19 b3457  
9.86 b1592  
47.24  
3.26  
17.5 b0414  
11.96 b4039  
7.82 b0060  
35.53 b3110  
15.06 b3384  
37.73  
47.54  
47.53 b0495  
58.8 b0602  
2.89 b2584  
8.1  
50.64 b3125  
9.06 b3160  
12.64

57.14  
8.83  
b0522

23.76  
6.16 b3615  
36.03 b2308  
19.17  
6.77 b1264  
33.32 b2677  
38  
8.21 b0640  
11.23 b2454  
40.95 b3961  
b0761  
35.14  
b2674  
30.25 b1712  
28.38 b3255  
52.75  
25.36  
19.56  
26.84

33.78 b3735

30.04

4.9 b1876

29.88 b3243

12.68

28.84 b4142

15.55

38.44 b3884

68.55 b4000

26.19

22.19 b4117

37.1 b3764

12.44

35.22

25.71 b4053

49.15 b3203

11.73

41.29 b3841

11.67 b3823

9.09

7.58

38.8 b0007

b1081

b1938

4.83

14.76 b2826

26.35 b2845

22.27 b3929

7.84 b3835

17.25

7.71 b1479

46.53 b1180

14.11 b1828

9.88 b1853

14.11 b1867

12.56 b0494

11.54 b0519

15.26

16.13 b1412

18.15

b1267

19.59 b1222

15.17 b1187

14.83 b1835

16.25

23.29 b0467

31.07

8.18

10.72 b4352

b0393  
3.39  
4.26  
9.59  
8.4 b3010  
54.81  
13.51  
8.71 b2595  
27.39  
12.22 b2685  
28.54  
8.69 b3570  
b3633  
72.25 b2797  
37.97 b2823  
8.37 b2147  
b2184  
49.92 b2193  
14.94 b1807  
17.26 b3306  
13.81 b0881  
7.15 b0871  
20.16 b3317  
6.11 b4156  
22.98 b4200  
3.16 b3053  
15.01

13.5  
20.44  
b0376  
10.25 b2100  
26.63 b2180  
25.09 b2187  
6.81 b2055  
7.49 b2135  
21.63 b3601  
9.71 b3522  
15.7 b3414  
8.24 b3106  
4.83 b1855  
22.6

23.08 b0791

40.86 b0949  
17.21  
28.55 b0786

2.81  
28.36 b3099  
8.6 b4192



21.72  
18.51 b0380  
24.57 b2343  
26.3 b3362  
24.38  
7.03  
39.37 b4202  
50.45 b3312  
40.93

15.09 b2947  
54.59  
30.03

31.35  
42.17 b3354  
8  
32.7  
19.41 b1778  
6.55 b1768  
28.58 b4373  
53.68 b3753  
13.45 b1839  
34.9  
38.1  
54.67  
27.27  
33.9

6.93  
27.23  
22.52  
8.23  
11.8

3.91

62.56 b4130  
62.88 b0693

49.27 b0809

60.58  
18.69

41.28  
100  
100

26.68  
49.57  
16.16  
28.94 b2468  
100  
32.39  
66.36  
46.84  
7.85  
7.73  
17.81  
12.99  
  
41.12  
18.77  
12.78  
  
20.68  
51.58  
84.6  
  
11.05  
12.84  
4.54  
83.8  
40.68  
83.6  
79.39  
17.11  
11.87  
25.09  
b0131  
26.22 b0196  
30.11  
14.45 b1270  
15.04 b3726  
48.3 b3754  
11.42 b4390  
12.33  
22.41 b3342  
14.05 b2436  
48.67 b3201  
15.38  
20.9 b0097  
13.73 b0123  
9.49 b0146  
6.91 b0176  
38.3 b1543  
42.16  
7.29  
29.64 b0693  
38.19

38.92  
71.72

30.63 b4388  
3.29  
22.75 b0222  
16.69  
14.11 b0959  
36.18  
12.89  
21.48 b0946  
7.87 b1631  
17.05 b1035  
23.84 b1087  
37.15 b1113  
16.43 b1627  
24.52 b3304  
65.32 b3359  
33.35 b3408  
23.36

3.7 b0922  
5.07  
54.08  
b3964

5.36  
18.93 b3954  
4.72

7.52 b2346  
22.32  
14.86 b2493  
4.96 b4016  
24.59 b3939  
10.76 b3957  
20.55 b2742  
14.35 b2326  
23.56 b2426  
18.62  
13.14  
31.18 b1759  
b4162  
57.59 b4196  
11.2  
37.59 b2207  
40.58  
40.38  
64.2 b4355  
11.09  
b1646  
19.74 b1046

23.16  
22.82 b2461  
27.15 b1124  
28.28 b1723  
    b4181  
35.97 b1126  
27.34  
    b1764  
    23.9 b1717  
26.81 b1659  
47.65 b3454  
11.42 b0073  
25.87  
    b4036  
23.86 b3750  
    9.07 b0155  
    2.45  
15.39 b0404  
    4.42  
50.15 b2322  
    7.53 b1725  
  
    4.57  
    8.38 b2027  
23.02 b3714  
15.74 b0174  
    5.36 b2008  
16.27 b0087  
    3.56 b2312  
14.36 b3461  
    9.89 b3164  
    11.8 b2536  
13.05  
12.78 b0179  
    2.3  
    9.72  
48.06  
12.86 b3449  
27.97 b3650  
    49.5  
    3.56  
19.67 b2419  
    44 b0811  
    8.55 b0581  
66.37  
45.15 b2576  
    9.32 b3041  
55.15 b4054  
    8.77  
12.96 b2019  
42.38 b0535  
11.63 b3885

38.38 b0857  
4.21 b0708

b0675  
14.03 b0714  
11.57 b3941  
b4063  
46.46  
5.54 b2552

3.17 b3994  
50.38 b3882  
18.79  
3.84

b1090  
b1286  
29.1 b2594  
12.91 b0029  
35.73  
2.17  
20.23  
14.26 b1258  
34.12

b0418  
28.49 b1335  
12.24  
21.9 b1813  
50.88 b1221  
3.27 b2821  
7.83 b2747  
43.98 b2735  
8.59  
12 b0049  
53.22 b3795  
37.18 b3779  
b3985  
b1175

24.16  
34.05  
9.67 b4021  
12.67  
25.46 b3901  
11.84 b3828  
20.02  
18.34  
75.52 b1468  
18.03 b1429  
5.92  
8.43  
20.52 b0463  
19  
7.46 b1520

62.51 b0909  
12.2 b0608  
22.42 b1248  
24.64  
6.53  
4.36 b1435  
8.7  
5.57  
16.87 b1844  
50.48 b2799  
19.3  
10.51 b2913  
16.13 b2945  
15.58 b0434  
46.82 b3473  
3.42 b3532  
47.32 b3582  
b3612  
67.29 b2788  
30.9 b2817  
7.37 b2890  
4.43 b3492  
31.87 b2807  
29.35

56.46 b3025  
44.96 b2841  
37.46 b2175  
b2040  
11.74 b2125  
32.65 b0877  
12.67 b3569  
89.5  
b3614  
5.7 b3499  
17.17 b3406  
7.76 b3177  
4.24  
27.32  
7.29 b3166  
13.34 b3034  
9.58 b2958  
14.46 b2687  
13.97 b2141  
22.43  
34.87 b2183  
10.55 b2113  
35.58 b2390  
7.3 b3305  
33.15 b3363  
6.16 b4174

13.9 b3003  
15.11 b2910  
43.86 b0764  
18.93 b0800  
12.23 b2613  
2.91 b2029  
8.22 b0756  
25.64 b0794  
20.92 b0838  
8.9 b3196  
32.95 b3086  
31.67  
41.94 b0329  
13.75 b2562  
20.27  
11.68 b4244  
6.49 b0585  
10.44 b3958  
48.27 b4176

16.53 b3260  
9.87  
19.35 b4056  
80.2  
25.66  
23.6 b3858

37.13  
34.98 b2749  
33.95 b1625  
27.1 b1583  
72.07  
13.49 b4203  
46.2 b3337  
15.41  
32.73 b1179  
35.44 b1205  
23  
11.58 b1847  
23.03 b1825  
35.47  
48.56  
40.91  
7.06  
10.11  
12.84  
26.53

12.76  
6.87  
18.19

18.28  
21.62

56.85  
29.59

59.5 b2601  
7.68  
39.6  
4.03  
83.8  
52.54  
15.26  
66.38  
4.83  
81.9  
14.87

27.5  
71.6  
83.3  
89.96  
10.39  
18.36  
19.93  
57.1  
27.16  
15.09  
47.75  
11.31  
39.53  
14.78  
8.17  
6.62  
27.14  
65.84  
43.61  
21.91  
21.46 b3448

33.63  
26.14  
11.44  
8.06 b0149  
5.58 b0674  
47.94 b0694  
14.49  
9.24  
7.67 b3668  
11.27  
12.43 b3744  
8.03



18.8 b0077  
52.68  
46.4  
16.09 b3210  
5.85 b3244  
80  
19.91  
5.97 b0680  
17.03 b0711  
10.13 b0194  
13.32  
b2057  
10.77

7.04 b0242  
87.1  
6.85  
15.99  
33.71  
11.6  
16.99 b0999  
16.32  
14.51 b2668  
36.83  
24.89 b3347  
21.14 b3392  
21.33  
45.24  
12.04 b1045  
39.43 b1095  
b1116  
22.52  
b3470

4.29 b4025  
22.59 b4061  
11.7 b4118  
11.54  
b4055  
11.41 b4078  
41.51 b4139  
65.7 b0863

b0873  
21.53  
20.13  
12.61  
5.8  
35.68 b0855  
  
32.82 b0154

13.96 b0333  
60.63 b1704  
33.35 b1905  
12.5 b1962  
13.07 b2218  
5.28  
14.88 b2265  
b2295  
44.85  
37.98 b2741  
b0158

31.4 b1711  
24.48 b0963  
25.28  
44.18  
21.9 b1912  
15.48  
15.07 b1656  
19.71  
b3635  
8.73 b3625  
4.97 b1604  
74.52 b1612  
56.4 b1588  
3.3  
7.15 b0219  
12.75  
7.3  
7.51 b2011  
b0095  
6.33 b2283  
16.41 b0238  
41.9 b1949  
17.9 b1595  
14.8 b3341  
24.85 b3710  
12.72 b0387  
19.22  
3.37 b4065  
11.86  
16.45  
21.07  
60.73  
6.64 b2509  
25.7 b0488  
33.65  
13.07 b3040  
8.94 b3084  
31.96 b3148  
3.94  
7.28 b1214

12.12 b2256  
b2432  
6.38  
14 b2664  
10 b4328  
13.76  
b3560  
12.45 b1235  
39.5 b1293  
16.85 b3905  
9.7 b3862  
9.86 b0790  
24.1 b0778  
24.34 b0050  
32.38 b3896  
13.16 b0636  
7.94 b0212  
5.81 b0908  
70.5 b2310  
27.06 b2617  
51.53  
25.12  
45.37  
18.71 b3498  
57.99 b0709  
28.14  
16.24 b1906  
12.3 b1322  
15.38 b2570  
15.46  
8.51 b2786  
50.47  
24.39  
42.9  
11.16 b3179  
30.77  
42.86 b4072  
19.84 b1944  
19.31  
4.06 b3966  
6.38 b0606  
38.33 b1245  
4.5 b1511  
15.11  
30.75 b3813  
44.86 b0046  
34.34 b2909  
19.31 b1940  
27.55  
37.42 b2416  
22.96 b1271  
5.21 b2777

25.86 b2765  
9.12  
10.61 b1878  
12.14 b1342

24.35  
23.68 b1817  
37.75 b1838  
13.51 b1865  
20.85 b0861  
5.76  
55.05 b0928  
9.64 b0587  
14.59  
5.97  
49.82 b1243  
66.93  
23.18 b1815  
2.86 b1378  
6.45  
9.73  
53.16  
5.72

b0409  
6.43 b2995  
37.52 b2700  
9.3  
11.08  
12.93  
13.37  
14.21 b2835  
71.11 b2935  
21.28 b2717  
11.83 b3554  
27.96 b3588  
40.89  
12.39 b2805  
11.82  
30.25 b2156  
3.94  
11.8  
17.98  
13.17 b3315  
11.17 b4175  
12.67 b3294  
4.82 b0878  
4.39 b4177  
62.89 b3124  
15.26 b2996  
10.8 b2703  
40.65

b4389  
7.12  
17.27  
16.91 b2170  
3.5  
9.01  
11.8  
66 b1223  
5.8 b3575  
20.34 b3468  
11.73 b3222  
61.73 b3095  
16.03  
17.05  
4.59  
57.59 b0819  
29.93 b2907  
8.89

4.98 b0808  
13.78  
21.96  
15.96 b3037  
51.36 b2462  
35.56  
10.16 b3730  
39.83 b0422  
41.22 b2673  
22.62 b0443  
60.91  
12.65 b3309  
23.25 b3311  
b4212  
37.63  
29.23  
b0952  
12.53 b2586  
28.53 b1643

35.04 b3936  
21.66  
14.28  
78.53 b1259  
35.13 b1796  
17.37  
32.69 b0189  
40.32  
96.39

45.05  
36.43  
17.08 b1836

11.01

29.32

5.82

12.26

2.81

6.76

20.5

17.92

16.2

64.73 b0709

57.7

41.45

9.08

45.94 b0864

59.71

16.1

8.28

20.04

10.6

42.01

11.78

13.21

26.27

62.1

26.25

4.8

100

16.67

40.51

6.67

16.3

10.1

4.03

33.58

7.87

7.58

58.16

79.5

11.35

23.01

14.29

12.95

10.35  
14.57  
59.07  
16.08 b0958  
14.15 b4032  
4.48 b0106  
7.4 b0128  
53.26 b0151  
51.48 b0198  
b3252  
20.92  
6.24 b0678  
45.28  
41.65 b3703  
63.75

11.25 b3713  
16.2 b3751  
5.74  
8.85 b0178  
23.03 b0083  
51.68  
5.83 b2660  
11.6 b1598  
18.81 b3319  
25.58 b3369  
62.35 b3411  
21.08  
b3353  
b3401  
31.03  
48.02  
b2062

43.34 b3450  
6.83 b2064  
85.2  
18.05  
7.84 b2056

13.99  
3.78  
10.23  
11.53 b0846

13.45 b0868  
19.33 b2530  
6.96  
15.97 b2508

14.59 b0916

4.31 b2723  
6.29  
71.18 b2465  
20.9  
7.35 b0919

17.77  
12.44 b4049  
20.07  
10.43 b2278  
37.99  
10.96 b1002  
13.82  
23.69  
14.26 b0954  
11.64  
39.32  
14.82 b1956

7.87  
b1958  
32.16 b2015  
5.76  
7.77  
7.42  
27.14 b1086  
21.15 b1073  
6.41 b3340

9.5  
5.3  
48.53  
7.35 b4013  
6.18 b0102  
b2257

7.53 b1650  
9.44 b0401  
28.92  
11.16 b4033  
7.47 b0243  
9.94 b0121  
12.32  
9.21 b2388  
11.08 b2262  
21.11 b2251  
18.83 b2533  
7.93  
18.79 b0524



9.27

11.67 b4380

13.22 b3608

4.4 b3524

29.66 b3417

43.97

11.23

36.81 b0889

6.46 b0577

12.09 b4234

15.86

13.29 b3643

18.04 b3068

30.18

5.42 b3644

8.88

29.2 b0078

6.55

3.63 b0726

17.87 b4120

b2608

4.14

11.18 b2020

41.15 b0241

10.15 b0480

b0945

56.5 b3917

10.51 b0659

11.66

18.5

49.43 b1917

37.45

2.82

48.72

36.19

3.21 b4006

34.11 b2523

10.78

19.96

8.59

26.7 b1093

14.6

3.45 b2599

10.8 b0006

39.56

27.94

20.91 b3894

6.5 b3832

8.15 b3803

8.17 b2925  
17.05 b1945  
10.27  
51.03  
8.56 b3169  
31.92 b2796  
44.91  
7.18 b3839  
6.75 b3822  
24.57 b3820  
10.14 b0475  
98.22 b3980  
b1939  
4.11  
11.15 b2825  
21.96  
9.34 b0489  
10.59 b0515  
44.95  
13.21  
b1277  
69.9 b1227  
6.46 b1191  
20.62 b1821  
44.68  
10.09  
6.03 b0477  
8.92  
12.96 b1526  
71.17 b0903  
64.74  
20.06  
3.92  
17.29 b3500  
10.71

8.37  
26.59 b2784

59.7  
34.4  
12.15 b0451  
6.02  
11.83 b3564  
1.96  
21.16 b4199  
20.77 b0388  
35.27 b0419  
20.93 b3008  
31.47 b2719  
4.58 b3571  
42.58 b3221

10.85 b3146  
16.49 b3002  
30.32  
45.11 b2672  
31.39 b2157  
1.97 b0374  
7.22  
8.24  
6.69 b2097  
17 b2140  
b3297  
b2052

9.55 b0213  
4.99 b3538  
17.96 b3441  
6.58 b3189  
47.85 b4195  
41.93 b4252

18.44 b3648  
13.82 b3180  
43.26 b3097  
26.38  
12.79  
8.4 b3089  
16.89  
12.08 b0125  
8.21  
7.46 b4155  
8.53  
21.29 b1529  
5.91  
21.2 b0787  
5.93

11.95  
21.07  
23.74 b2792  
17.6 b2940

26.03  
31.97  
33.47 b4068  
19.87  
39.9 b3302  
17.54  
37.01  
25 b1481  
92.2  
51.01  
15.52 b0884

84.3  
13.8 b0103  
20.55  
b0133  
18.14  
34.38  
41.05 b3007  
21.83 b1837  
60.46  
42.65  
b1824  
30.63 b1480  
25.16 b0762

22.76  
16.66  
8.44

7.01

10.45

11.2  
7.99

63.16 b2787  
67.14 b2797  
3.41  
5.66

32.15  
54.15  
22.24  
84.8  
10.48  
10.7  
47.92  
19.23  
81.4

37.56  
24.29  
79.24  
100

98.4  
20.28  
84.8  
90

40.06  
29.1  
23.17  
20.21  
27.45  
9.62  
73.28  
78.2  
10.86  
89.4

9.75 b1207  
44.57 b0066  
21.88 b3224  
8.49 b3249  
b0167  
50.87 b0676  
36.46 b3265  
13.3 b0187  
26.74 b1536  
21.21 b1928  
6.84 b3619  
18.01  
3.16 b1927  
16.82  
59.15  
3.14 b0026  
24.25  
21.12 b3193  
8.75  
33.34 b0953  
16.5  
3.29 b1049  
16.58 b1098  
44.99 b1119  
39.1  
21.59 b1084  
14.92 b1110  
34.26  
19.5 b3465  
7.05  
6.98  
9.11 b1780  
  
9.49 b0002  
9.33  
5.66  
19.72

14.14  
18.22  
30.13

5.62  
22.65 b2342  
9.51 b2410  
3.15  
79.03  
10.08 b0911  
59.22  
11.82 b0885  
6.3 b2556  
14.11  
13.35 b3946  
9.92  
18.26 b4140  
b2476  
11.46 b2522  
10.43  
50.17  
11.45 b3926  
10.65 b3959  
9.34 b2241

3.7 b4350  
b1889  
b1726  
b0334  
11.82 b4043  
6.62  
15.79 b1641  
41.44  
6.01

3.8

b4240  
2.18

17.98  
33.1  
51.16  
12.96  
37.13  
7.44 b0043  
38.33 b0113  
4.21  
12.43 b2289  
19.61 b1709  
14.27 b0841  
33.03 b1628

63.67 b1587  
6.78 b1585  
9.33  
12.75  
17.8 b0405  
23.84  
15.25 b2318  
9.46  
15.18  
23.51 b0448  
14.36  
34.87  
6.1 b4219  
16.26 b4259  
9.17 b2581  
7.81 b3051  
71.49 b3114  
4.21 b3158  
17.39 b3938  
6.2  
12.24 b0458  
37.83 b2661  
4.74  
b2572  
16.91  
4.18 b3533  
17.3 b3153  
22.39  
11.48 b2499  
b1015  
13.27 b2676  
7.24  
1.75  
13.74 b3404  
47.89 b1292  
9.58 b3904  
10.44  
33.68  
6.95 b1062  
18.84 b3361  
12.83 b3895  
60.09 b0635  
30.17 b0208  
12.27 b1629  
  
b1070  
4.66 b4058  
14.81 b2620  
4.27  
8.35  
18.57  
30.43 b3732

5.27 b0397  
36.33  
49.79  
12.58  
28.15 b1279  
24.58  
    b3631  
34.08  
55.62 b3992  
    7.17 b3849  
        b2514  
20.44 b3790  
19.05 b3772  
55.25 b1226  
29.55  
14.44 b1254  
14.29 b0109  
14.46  
    b3892  
    3.79  
54.76  
    7.87 b3810  
    6.7 b3774  
    3.51 b0143  
12.98 b1818  
    9.36 b1203  
22.49  
24.67 b0461  
67.79  
    7.11 b1534  
    68  
    7.03  
    7.96  
    22.1  
36.44  
38.62  
12.32 b1379  
19.34  
    6.44 b0496  
42.55  
38.29 b0525  
32.37 b0593  
    82.6  
30.81 b1220  
    8.11 b1186  
    80.6  
46.76  
    b3591  
14.49  
    4.64 b3016  
17.29 b2831  
    8.06



13.09  
16.49 b2678  
23.3 b2670  
b3258  
17.87  
6.11 b2905  
28.38 b2941  
14.58  
21.58 b0457  
28.45 b3523  
6.67  
47.59 b4197  
6.47  
  
20.87 b2711  
10.39  
3.97  
b2671  
b2153  
b2047  
12.21  
40.09 b1193  
11.45 b3580  
4.44  
34.84 b1827  
11.29  
26.08 b3321  
6.5 b4171  
71.33  
13.98 b3183  
26.96 b3072  
8.49 b2988  
21.02 b2923  
15.98 b1077  
19.18 b3059  
8.46  
2.6  
10.02  
b2954  
b2901  
13.43 b0753  
58.86  
14.75  
20.25  
11.24  
9.44 b0795  
59.25  
26.73 b0454  
b0391

40.81  
44.7

49.44 b2528  
22.85  
36.4  
b2145  
30.9

26.39 b4347  
29.28  
41.51 b1684  
17.66  
77.46 b1677

b3611  
8.19  
7.62  
62.56  
21.42 b0048  
29.66 b0052  
49.78  
32.72  
15.04  
b1305  
44.31

23.4 b3042

8.88  
10.11  
5.61

41.33  
6.7

22.73  
14.36  
9.7  
3.95  
18.86  
39.73

62.48 b2964  
66.36  
13.53  
23.09  
34.48  
43.05  
79.13  
13.1  
19.87  
86.6

58.65  
88.1  
27.77  
9.89  
48.67 b1636  
88.2  
79.5

2.39  
13.43  
68.8  
11.71

21.93  
83.6  
13.1  
4.24  
5.99  
2.56  
6.6 b3559  
13.32

7.9 b1127  
10.95 b0088  
8.06  
12.83 b0134

78.73  
17.77 b0153

17.68 b0686  
41.9

5.71 b3746  
14.34  
30.85  
49.6  
14.56  
9.11 b0758  
33.24 b0099

9.28 b0970  
13.54 b3282  
43.25 b3351  
b3399

14.12 b3344

13.06 b3390  
13.43 b1132  
31.52 b1793  
4.23  
7.82  
39.89 b3431  
19.89 b3467

59.21

13.51 b2068  
82.1

5.58  
5.28 b0951  
28.08 b1608  
50.18

34.64  
41.28 b2554  
3.17  
32.36 b0902  
5.4 b0925  
8.91 b3915  
9.71 b4028  
17.24  
20.12 b4153  
31.01  
9.54 b0904  
5.02  
3.44 b4019  
19.63  
23.03

20.84 b2293  
28.83  
b1106  
23.96  
b1064  
8.04 b3990  
40.56 b1729  
11.57 b4167  
16.32  
b2208  
11.05 b2247  
4.36  
9.87 b2211  
14.39 b2250  
b2290  
b2319

11.16  
22.63  
    b3743  
21.61  
    b0183  
14.19 b4040  
27.32 b2341  
10.58 b0093  
13.61 b1747  
    9.9  
49.66 b1679  
18.88  
16.67  
55.54 b0402  
55.25 b2202  
    8.94 b2561  
    9.95 b2016  
15.89 b0065  
14.83 b0108  
25.59 b2231  
54.99  
41.29 b0810  
57.39 b1990  
37.63 b0590

12.62  
    8.75 b3656  
    50.2  
    5.54 b3453  
25.84  
    4.8 b2511  
10.54 b0464  
20.62 b0504  
    b4209  
    9.15  
    38.1 b4391  
22.36  
32.49 b3105  
26.73 b3386  
35.53 b3699  
15.08 b2025  
    6.57 b0411  
10.63 b1281  
17.38 b3289  
    7.16 b3389  
    6.59  
10.67 b2567  
30.64 b2455  
21.69 b3856  
    5.18  
56.27  
    6.95

b0847  
8.14 b0828  
8.07 b3364  
11.66  
15.05 b4107  
48.82 b1864  
46.17 b3241  
26.21 b0023  
12.07  
20.41  
7.43  
28.72  
10.33  
b4119  
9.54 b1871  
43.96  
7.98  
24.67 b2618  
19.48 b0025  
26.85 b4237  
18.42  
9.05 b3784  
13.38 b3825  
9.15 b2806  
b3983  
11.35 b1079  
19.31 b3367  
44.46 b3237  
13.25 b2781  
18.05 b3932  
23.94 b3846  
28.1  
13.81 b3812  
3.26  
41.83  
2.13 b3988  
15.6 b1288  
11.67  
10.78 b2791  
4.83  
20.19 b0507  
b0927  
56.86 b1466  
25.53  
8.96 b1255  
11.39 b1204  
9.34 b1805  
24.45 b1833  
8.15 b1843  
18.31 b0465  
32.2  
52.7

24.26 b0914  
55.44 b0601  
15.05 b1430  
44.49  
15.39 b1434  
24.83 b3529  
13.87  
29.02  
    b2721  
44.39 b2801  
21.72  
20.07 b0412  
    3.73 b0439  
        b3481  
    5.31 b3546  
11.15  
    5.51 b3613  
        b0209  
    4.87 b0406  
    57.4 b2991  
20.26 b2686  
52.79 b3539  
10.09  
    52.4 b3181  
        b3070  
14.01  
    b2697  
14.26 b2150  
    8.36  
32.28 b2709  
20.61 b2178  
  
31.57 b2128  
    5.39 b0870  
20.43 b3310

    4.88 b3300  
10.46 b3493  
16.18 b3226  
    5.68 b4351  
    2.38 b4221  
13.38 b4372  
18.49 b4149  
43.76 b4243  
20.72  
41.07 b0658  
17.61 b3204  
    b3103

    9.19  
18.62 b2894

16.8  
10.56

3.84  
14.45  
11.65 b0813  
23.1 b2899  
31.44  
18.2 b0407  
50.5 b0460  
18.16 b3006  
53.51 b2809  
63.89  
13.38 b4079  
28.25 b4057  
29.67 b4144  
75.62  
22.98  
6.82 b2255  
98.5  
71.6  
27.63  
19.95 b1523  
21.07 b1376  
23.39 b1842  
11.13 b0107  
45.54  
b3745  
31.94 b0415  
b2939  
43.12  
35.56 b1382  
40.33 b1307  
  
47.21 b1826

8.36  
8.16

19.21  
14.12  
36.29  
8.33

67.09 b1814  
34.1  
10.26  
14.08



64 b2788  
70.62 b2935  
66.19  
29.58  
15.98  
3.4  
30.09  
68.8  
10.15

20.84  
27.82  
23.17  
12.43  
35.1

69.14

73.5  
17.93  
53.58  
78.66  
43.91  
8.14  
52.49

13.46  
47.38  
8.68

42.98  
20.77

50.48 b3197  
9.32  
29.28

8.62  
13.47  
8.83 b1581  
51.13  
10.44 b4241  
7.88  
64.72 b0008  
6.11 b1263

10.48  
b1261  
13.97  
3.5 b0059  
9.44

43.02  
28.93  
15.77 b1066  
16.35 b1108  
10.86  
58.48 b1054  
39.98 b1100  
7.73 b3426  
9.07 b3447  
11.84 b4360  
b4394  
24.65 b1792  
b4364  
20.22 b4396  
3.24  
4.65  
8.53  
6.08

56.87  
18.52  
7.46  
59.37  
7.6  
18.64 b2434  
16.48 b2479  
7.03 b0898  
8.78 b0923

34.42 b2532

19.29 b1518  
3.4 b3955  
24.56

31.18 b2503  
42.48

8.8  
49.26  
9.89 b2729  
7.26  
10.01 b4332  
55.88  
30.84 b1797  
30.13 b1599

6.93 b1133  
9.06 b1111  
1.87  
6.31

6.57  
7.8  
5.15

20.77 b4269  
11.24  
30.8 b1892  
5.8 b1710  
4.2 b2028  
5.74 b3700  
27.46 b2559  
7.09 b0159  
24.55 b0089  
12.69 b0068  
26.09 b2330  
10.76 b1728  
11.81 b1947  
8.71 b2104  
42.46 b1611  
17.32  
10.13  
b3715  
19.16 b0171

3.99 b0098  
20.75 b2280  
18.35  
30.55  
34.66 b0490  
19.9 b0479  
17.36 b4152

16.79  
5.88 b3035  
13.68 b3073  
28.9  
20.02 b2252  
4.85 b2411  
48.85 b0509  
24.4  
8.95  
16.47  
b2585  
12.7 b3057  
16.46 b3486  
30.31  
15.98 b0417

28.54  
55.82 b0826  
12.23  
11.8  
28.98 b2307  
19.76  
16.64 b1252  
23.43 b2438  
9.25 b1517  
19.7  
4 b2452  
3.55 b3960  
7.64 b0752  
20.51 b0738  
3.85 b2675  
48.09 b1531  
11.08  
14.94 b1326  
14.38  
14.02 b0190  
37 b1130  
b3998  
13.56  
b4187  
15.43  
5.63 b1091  
35.86 b1284  
31.9 b1869  
20.62  
9.07  
16.99  
16.37  
14.13 b4001  
b3843  
16.4 b3817  
49.26 b3781  
69.47 b1224  
13.05 b1809  
25.52 b1251  
2.96 b2836  
  
86.5  
20.8  
68.57 b1469  
13.41  
13.35  
49.47 b3766  
2.07  
14.18  
28.81 b1273  
  
12.57 b1846

6.19 b0611  
7.47  
23.43 b0596  
12.39  
53.9  
5.93 b1451  
7.74  
13.59  
30.46 b1858  
b0865  
14.21 b0511  
5.8 b0512  
10.87 b0891  
8.68 b1414  
15.56  
63.74  
42.01 b1816  
24.04  
46.79 b3578  
6.8  
6.78  
37.38  
13.97 b2922  
  
11.28  
7.36 b2710  
5.98 b2938  
  
32.86  
17.84  
41.32 b2965  
b0444  
29.02 b3494  
19.87 b2959  
37.94  
8.32 b4235  
12.64 b4376  
9.53 b2681  
33.99 b2076  
24.06 b2176  
8.36 b2043  
44.83 b2079  
b2159  
8.11 b2066  
17.86 b1831  
29.19 b3606  
26.26 b3552  
5.42 b2152  
16.49 b1212  
7.35  
13.12  
21.62 b4185

9.52 b3032  
13.52 b3157  
18.46 b3005  
24.56 b2924  
12.04 b3207  
10.55  
    b3011  
14.12 b1334  
29.27  
23.36  
61.59 b2936  
28.88 b0968  
    8.09 b0767  
22.18 b2949  
25.33 b0950  
    3.55 b0740  
22.43 b0776  
56.37 b0822

14.69 b2953  
24.42 b0471  
18.71  
    b2498

16.42 b2107

    b0410  
24.61 b3610  
19.52 b4189  
50.91 b2728  
    b1003

25.64  
    27  
    7.28  
88.38

35.49  
38.54  
    2.07 b0054  
28.74  
21.34  
16.02 b1332  
29.39 b1436

42.02 b3107

9.13  
1.84

10.98

13.56

20.75

55.31

12.11

20.2

38.02

78.71

50.82

15.84

67.35 b2965

12.42 b0697

13.1

77.96

83.3

38.18

25.4

79.5

100

16.44

8.75

29.72

35.64

58.65

10.35

19.59

24.72

32.47

48.4

26.51

90.12

68.46

78.83

28.66

56.39

21.83

6.97

28.59 b0996

9.32

5.12

17.15 b0019

12.09 b0041

4.15 b3907

11.53 b3018

9.03 b3209

b3242

72.99 b3266

10.83 b0643

36.19 b0116

26.31 b0129

25.55 b0162

12.92

7.63

54.87 b3438

6.84

35.33

4.52

14.03

22.19

81.3

10.65 b0223

9.26

19.03

17.32 b1033

23.4

52.76 b1020

11.96 b1057

25.9 b1104

30.2

b3281

9.06 b1063

7.87 b3409

14.27

b3471

10.18 b1512

18.78

15.08

36.7 b4077

b2746

15.25 b0848

7.63 b2324

2.84

2.55 b2520

11.36 b4015



10.43  
15.17 b4071  
25.57  
18.34 b4159  
58.09  
    11.2 b2431  
    5.41 b2477  
20.95 b1766  
54.35  
16.05 b4184  
19.38 b4222  
30.13  
23.37 b2279  
51.29  
    5.63 b2298  
    5.63  
39.03 b3115  
33.85  
    b1047  
12.38  
18.52 b0330  
    8.79 b1784  
20.74 b1660  
46.23 b4193  
  
    55 b2311  
    b1714  
10.83 b1681  
    3.65 b4375  
11.11  
23.83 b3662  
40.41 b4035  
47.32 b3749  
    10.1 b0200  
    15.7 b1960  
15.84 b4046  
28.94 b1746  
16.12 b1743  
10.18  
48.27 b1644  
11.72 b1075  
61.71 b2039  
15.93  
40.45 b4329  
42.09  
    6.13 b3531  
29.15 b3154  
    8.07 b2261  
    6.29 b2243  
    5.73 b2480  
    b0493  
18.43

7.95  
53.72 b3653  
37.38  
49.53  
16.73 b3440  
10.81  
5.72  
28.12 b4255  
57.12  
8.52 b4245  
18.1 b3940  
9.1 b0698  
14.6 b0712  
18.1  
4.92 b2557  
11.95 b3906  
11.8 b0639  
6.37  
68.72  
50.78 b3405  
23.53 b1291  
8.58 b0071  
12.9 b1241  
10.27  
10.27 b2451  
b3888  
16.5  
b3995  
b3881  
18.66  
33.06  
23.57 b1089  
18.43 b1324  
5.11 b2501  
61  
6.57 b3628  
30  
17.26 b3991  
  
29.56  
32.5 b3737  
65.87  
48.33 b4115  
7.01  
4.11 b1276  
58.4 b2601  
67.34 b2787  
41.67  
13.2 b3842  
88.3  
b3789  
11.78

35.06 b3778  
5.77 b0067  
b1242

57.74  
26.8 b2827  
46.8 b1246  
16.1  
38.1 b3819  
16.27

7.47 b1188  
18.38 b1232  
37.33 b1444  
4.82 b1830  
8.17 b1856  
14.76 b0492  
b0516  
8.77 b0520  
23.18 b0579  
18.8 b0610  
11.29  
5.37  
25.51

4.96 b1325  
21.88 b0484  
40.24 b1528  
7.82  
44.52  
10.15 b0426  
56.25 b3474  
23.4  
b3579  
10.67 b3641  
5.09 b3647  
9.99 b2803  
79.8  
4.32 b0398  
9.61

49.47  
13.05  
2.47  
50.29  
8.89 b0421  
47.36 b3012

12.92 b2124  
b0874

11.63 b4148

15.74 b3318  
17.94 b4168  
20.48 b3167  
10.58 b3052  
6.44  
6.68  
3.09 b4392  
5.48 b0377  
10.28 b2173  
8.44  
19.93 b2109  
61.26  
60.6 b2964  
14.07 b2916  
12.51 b0742  
43.9 b0797

23.06 b1078  
53.9 b0773

10.71 b3199  
7.02  
16.38 b2952  
17.05 b1914  
1.86 b3212  
15.13  
18.83 b3067  
14.96

8.53  
62.58  
24.39  
60.78 b2669  
39.23 b3636  
b2609  
18.77 b0528  
13.64 b1282  
21.16  
23.96 b1930  
b1446  
23.79  
29.15 b3775  
49.86 b0912  
19.46  
57.07 b3581  
11.58  
19.38  
18.33  
46.33  
39.02 b4402  
60.61 b0001

35.48  
57.76  
36.35  
28.5 b3049  
29.51 b3175  
33  
37.26  
28.05

18.95

15.04

10.56  
21.97  
22.02 b1816

60.15  
8.59  
41.1 b2063  
30.86  
67.34  
26.67 b3030  
64.85  
64.32 b3213

22.11

14.43

11.26

84.6

19.4

21.63

6.9

81.6

92.6

100

7.62

59.73

86

82.96

91.58

17.31

36.08

32.89

42.17

13.11

17.89

86

87.57

56.25

23.96

10.96  
2.87  
57.1  
76.41

12.99 b0695  
30.14  
13.99 b3727  
13.6 b3755  
10.37 b1209  
9.26 b0072  
3.63  
b0081  
61.64 b0112  
46.97  
3.69  
34.35  
9 b3232  
29.5 b3257  
b0641  
38.94 b0662  
49.1 b0692  
13.17  
5.87 b1783  
5.04 b2059  
84.5  
19.03

20.97 b2662  
31.03  
13.32  
42.4  
3.36 b0932  
40.81 b1591  
6.92 b3346  
3.6 b0947  
9.45 b1630  
17.99 b3301  
13.52 b3358  
2.22 b3403  
10.06  
34.97  
8.79 b1097  
51.14 b1117  
18.33 b3437

4.12  
19.74  
    b3930  
    b3965  
37.75  
10.19  
    8.06 b2344  
53.91 b0864  
    8.35 b2463  
    20.5 b2494  
18.61  
52.09  
20.39  
27.52  
    b2743  
    b2780

4.19  
10.55 b1740  
13.24 b1649  
28.7 b1953

4.37 b2242  
50.38

40.1  
10.52 b1034  
14.48 b1765  
10.85 b1640  
    8.97 b1610  
23.96 b1607  
40.83 b1053  
50.45  
13.02 b1633  
    8.33 b1959  
    6.36 b2022  
14.84 b1763  
23.89 b1642  
18.09 b1654  
    8.95 b1614  
43.67  
20.88 b3742  
45.34  
    8.74 b2564  
23.86 b0400  
    3.92 b4014  
18.71  
15.73 b1727  
    6.43  
14.27 b1950  
16.29 b1624

7.33 b1593  
11.74  
6.85

b3029  
52.15 b3463  
16.41 b3385  
39.84  
44.92  
9.29 b0453  
86.8  
21.99 b4226  
39.29 b4354  
9.51 b3039  
5.88 b3081  
b3085  
19.97  
12.34 b2297

2.34 b0518  
5.81 b0517  
5.17  
12.3  
21.23 b0653

b2568  
8.17 b2026  
21.61 b3871  
40.55 b0856  
b3291  
61.8  
14.13 b1083  
18.26 b2566  
37.06  
52.66 b2551  
4.24 b1014  
b1613  
55.79 b0844  
12.37 b0818  
29.65  
22.5  
10.99  
10.83  
15.91 b1908  
54.04 b1329  
34.34 b1306  
16.1  
26.71 b0028  
26.51  
34.83  
8.46 b3878  
74.27 b3460



83.6  
30.04

b1868

23.7 b2844  
35.79 b3065  
26.58  
31.19 b3831  
13.74  
16.75 b2914  
b3794  
13.96 b2951  
13.56 b3986  
32.74  
39.96  
20.27 b3867  
23.68 b2839  
8.05  
16.37  
5.76 b3765  
2.35  
15.69  
15.52 b1478  
9.09 b1428  
3.82 b1381  
8.37  
27.14  
11.77 b1540  
8.57 b0930  
42.64 b0588  
40.62

10.7 b1449  
11.45 b1822

21.25  
45.87 b1902  
b0505  
8.32  
7.62  
44.66 b0394  
44.33 b2997  
9.99 b2701  
5.5  
17  
9.7  
6.2 b3660  
b2818

7.51 b2956  
12.23 b0452

20.62  
14.11 b3634  
35.28 b2798  
7.61 b2843  
7.57  
10.54  
14.65 b2699  
16.88 b2061  
34.17  
8.39 b3621  
18.93 b3316  
8.64 b3211  
8.62  
42.11 b3496  
19.72  
13.14  
15.33  
13.05  
26.42  
b4141  
13.61 b2689  
57.41  
22.67  
29.87  
16.38  
4.67  
18.21 b0956  
6.29  
6.73 b0815  
b1749  
28.24 b3128  
30.3 b0792  
38.27 b2906  
9.39  
15.52 b3088  
39.77  
25.69  
26.37  
16.7  
7.46  
45.69  
22.2  
10.76 b0760  
15.43  
19.09 b2526  
36.27 b2471  
41.64 b0466  
61.17 b1195  
25.44 b4023  
70.6 b4353  
24.71 b3425  
32.5 b3459

34  
17.18  
87.7  
6.32 b3561

5.55 b0239  
8.67 b0004  
16.79  
27.51 b1648  
45.86  
14.63  
44.81  
24.99  
46.58 b1058  
23.88  
19.57 b3156  
22.61 b3101

40.31 b0917

67.1 b0751

3.39  
28.13

11.61  
7.96

53.3  
61.05  
68.95 b0061  
69.3 b0186  
10.44  
66.49 b0903

70.83 b3266

38.43  
61.7 b3789

100  
9.21  
29.7 b1536  
28.07  
13.63  
61.96  
10.22  
15.63  
31.22

18.64  
98.78  
8.73  
61.87  
32.2  
55.77  
8.66  
11.89  
11.74  
10.06  
1.69

10.52  
43.4  
21.96  
7.15  
11.4

14.78 b0474  
12.31  
50.61 b3667  
64.08  
13.63 b0051  
4.82  
45.18 b3188  
26.92 b3230  
5.35  
27.41 b0634  
56.84 b0652  
b0124  
24.66 b0147  
b0177  
58.54 b1542

8.07  
18.08 b3462  
b4374  
37.28  
3.71 b0221

b0955  
84.11  
8.41  
60.98  
9.07 b0960  
8.47 b1004

6.74 b1055  
16.65 b3857  
33.42  
11.68 b1036  
40.14 b1094  
3.99 b1114  
5.42 b3432  
30.71 b1048  
6.6 b3398

9.94 b1786

60.7 b3927

20.16  
25.28 b4064  
58.55  
7.8  
34.54 b0862  
4.58 b2400  
21.66  
6.41 b0876  
11.76

23.1  
25.31 b4111  
34.66  
11.6 b2328  
24.88 b2408  
b2466  
30.19 b2504  
3.18  
64.3  
38.3 b4201  
2.77 b2206  
63.32 b4265  
13.97 b2294  
3.21 b2286  
7.49  
41.05 b1920  
33.06 b3336  
b0961  
23.55 b1123  
11.53 b2460  
44.31 b1125  
6.96  
13.8 b4182  
11.96 b4216  
50.81  
14.36  
3.82  
63.62 b1237

16.25 b1072  
6.06  
21.04 b3671  
b3731  
8.26 b2574  
10.03 b0195  
11.6  
12.34 b2327  
6.44  
5.99 b1703  
39.65  
b3456  
6.49  
10.93 b2204  
20.36  
9.78 b4371  
11.66 b3551  
4.95  
4.3 b3163  
23.79 b2399  
8.91 b2513  
29.1  
13.38

10.35 b4386  
43.01 b3574  
12.24 b3520  
15.55  
18.77

13.21  
4.68 b4114  
11.71 b1068  
b2441  
27.68 b3887  
5.59 b0628  
33.73  
7.44  
10.41  
8.86 b0788  
17.78 b0765  
48.2 b1676  
42.19 b2306  
3.56 b0074  
37.91 b0161  
68.55 b0440  
5.72 b3290  
34.26  
44.07 b0532  
14.05 b0715  
14.78 b0729  
44.18 b4004

28.88 b3497  
4.32  
10.42  
30.72 b2282  
6.65 b3240  
39.32  
8.04 b2600  
22.51  
20.94 b3883  
14.53 b3999  
b2718  
63.38 b3876  
7.84 b0661  
29.29 b0445  
8.53 b4070  
16.9  
13.58 b3259  
6.37 b2813  
10.94 b2738  
13.43  
41.24  
42.45  
11.24 b3771

26.31 b3769  
11.18 b2516  
b1176  
b1257  
19.19 b2800  
9.93 b2753  
12.56 b3827  
4.91 b3805  
20.83 b3981  
69.8 b1814  
22.05  
11.99 b1206  
24.29 b1819  
9.89 b1840  
4.23 b1866  
52.5 b0508  
b0527  
36.83  
49.45 b1453  
16.96  
38.02  
8.62  
7.05  
50.75  
9.62  
24.72 b1285  
56.93  
14.49 b0915

3.17 b0893  
9.51  
13.76  
24.08

14.31 b3592  
14.06  
12.51 b3026  
6.25 b2616  
14.01 b2896

33.71 b3485  
4.57 b3536  
15.58 b3654  
14.44 b2604  
73.26  
6.49 b2942  
b0433

23.69 b2075  
27.54 b2137  
21.89 b3293  
19.63 b0879  
65.07 b4198  
17.06 b4261  
13.65 b0867  
b4178  
5.96 b3118  
27.7 b2994  
29.59 b2704  
b2712

18.25  
11.17 b2720  
20.83 b2185  
9.66 b2054  
11.29  
12.36 b1215  
10.75 b2946  
13.17  
b0779

b3206  
78.11  
48.14 b0820  
39.53  
43.96  
15.63  
5.96 b2214  
13.27 b0736  
5.69  
51.29 b3098  
70



16.93  
13.55  
20.75  
59.88  
43.44 b3637

24.59  
    b1811  
    30

34.82 b3410  
11.69 b3982  
15.47 b3762  
19.92  
71.23  
    20.1 b1448  
16.96 b0062  
47.04 b1621

18.77  
25.32 b2666  
    34.5 b0075  
    89.2

18.27  
54.03 b3672  
10.64 b3170  
    10.4 b3176  
    8.89

9.35  
    b0735

7.15  
10.76  
37.67  
    12.9  
    14.9  
33.77  
59.88 b0008  
22.36  
    55.2 b2041  
39.67 b2167  
30.59 b2171  
11.89  
30.24  
67.28 b3114  
33.95  
13.07

7.67

13.92  
17.2  
100  
6.86  
58.1  
31.76  
6.42  
81.9  
8.06  
27.07  
6.33  
77.9  
100  
14.75

19.4  
100  
3.9  
90

48.19  
15.55  
16.4  
4.26  
5.42 b4349  
68.52  
  
57.66

13.68 b4112  
4.26  
4.86 b3741  
b3202  
44.74 b3030  
19.8 b3186  
50.37  
b0096  
24.13 b0122  
13.66 b0144  
18.81  
29.11 b1580  
3.39 b3245  
11.06 b0626  
7.21  
4.61 b0681  
16.22 b0713

5.3 b2045  
7.37  
6.67  
17.43  
30.73

20.93  
12.44

35.42  
40.49 b3292  
33.35 b3356  
3.55 b0967  
17.92 b1584  
16.16 b3349  
15.46  
10.11 b1136  
15.37 b1790  
16.8 b3350  
5.94 b1107  
20.58  
45.14  
8.22 b3902

23.01 b1515

11.6 b2732  
45.42 b2736  
16.59  
31.59 b2395

5.44 b2474  
27  
10.29  
b3920  
4.23 b4029  
20.29  
4.89  
b0858  
15.71  
17.27  
4.45 b2517  
11.57 b1688  
27.46 b1907  
24.16

5.26  
6.43 b4336  
85.7  
b2316  
4.04

19.73 b1716  
54.81  
18.09 b1791  
8.41 b0964  
8.66  
2.92 b2216  
3.16 b1913

18.46 b2212  
5.08

39.04 b1636  
57.3 b1601  
9.82 b4037  
2.69 b0994  
22.93 b3675  
13.09 b0169  
5.83 b0369  
b0094  
36.38 b2287  
20.9 b1266  
8.37  
12.35  
55.73  
47.52  
13.66 b3712  
23.04  
12.26 b2577  
b3071  
13.51 b3424  
25.06  
11.04

12.82 b0591  
30.02 b4191  
30.54 b4260  
7.63 b2583  
6.95 b3054  
10.1 b3116  
54.95 b3126  
58.76 b2245  
11.94 b2496  
15.47 b0472  
19.72 b0459  
15.31  
7.84 b3870  
29.75 b0824  
9.04 b0728  
6.17 b3869  
70.3 b2309  
8.35 b0080  
42.79 b0684

21 b0724  
10.23 b0181  
12.23 b2607  
b4172  
b1210  
30.48 b2500  
16.43 b0827

14.29 b3916  
21.55 b0654  
20.2 b3279  
13.42  
36.3  
20.53  
16.17  
35.35 b1915  
57.06  
14.67  
11.97 b0011  
10.82 b0003  
39.03  
40.33  
3.96 b3147  
31.2

13.56 b2148  
6.91  
30.73 b0150  
57.09  
15.22 b2285  
57.68 b2833  
b3848  
21 b3824  
6.58 b3802  
8.4 b3984  
5.28 b3787  
18.28 b3972  
41.63 b1941  
42.29 b2415  
b0064  
2.69 b2779  
13.4 b3924  
16.22 b2024  
5.42 b3792  
12.71 b3996  
8.46  
4.46  
49.3 b1197  
b1423  
9.56 b1340  
65.7 b0860  
51.74

10.4 b0920  
67.91  
44.48 b0599  
28.13 b1269  
45.62  
6.79 b1808  
3.77 b1834  
13.45  
5.67 b1862  
32.54 b0468  
5.83 b0513  
6.62  
12.9

91.55  
9.35  
8.6 b3559  
27.05 b0739

13.77  
10.4 b2838  
17.19 b2937  
12.7  
41.62 b2713  
21.61 b3550  
11.58  
b2824  
6.79  
13.96 b2966  
19.43 b2992  
83.6  
42.37 b2129  
9.52 b1806  
13.68 b3308

3.35 b3178  
11.25 b3064  
58.55  
9.68 b3192  
15.38  
7.18  
b0375  
17.68 b2099  
31 b2706  
4.58 b2114  
24.95 b2182  
38.64  
5.94 b2134  
10.66

19.95 b0722  
5.53

12.88  
20.77 b3155  
29.75 b3096  
39.27 b0832  
36.62  
8.16 b3102  
20.97  
50.12 b2895  
60.37 b0754  
4.8 b1082

36.42  
48.04  
16.75 b0741  
9.59 b0777  
56.91 b0597  
b2524  
64.08 b2470  
17.73  
20.43  
34.13  
30 b3649  
b3600

45.38  
19.38  
80.4  
b3535

7.78  
15.4  
13.57  
15.94 b1482  
b0024  
4.89

27.72

29.36 b2529  
25.21 b3149  
32.04  
9.37 b0852  
54.64  
23.34  
30.49 b0784

13.72  
10.38  
23.3  
23.62

38.86

39.34 b1917  
68.28  
29.6 b0161

17.5  
61.42 b0909

12.54

9.09  
81.2  
3.73

73.58  
11.83  
4.45  
8.57  
100  
14.86  
20.1  
18.24  
53.52  
16.93

12.92  
3.16  
6.65  
25.17  
17.52  
43.65  
14.58  
14.29  
30.6

41.16  
5.69 b3546  
6.78  
17.29  
11.58
