# Supplementary material
Source: PubMed Central journal article supplement (PMC152813)
Supplement: nar_31_7_1869__2.pdf [file nar_31_7_1869__2.pdf]

Table B. Processed datasets for all experiments

SPOT SPECIFICITY: best representation of a gene fulfilling both criteria - > 97% sequence identity over  
 THRESHOLD: Top 90% of intensities in at least one channel, Fig1 and 2, top 95% in peroxide experime

| SPOTTING | CHIP_ID  | SPOT_SPI   | GENE_OC | GENE_OC | STM_BES | GENE | Description              | STY_BEST |
|----------|----------|------------|---------|---------|---------|------|--------------------------|----------|
| 1        | CTRL001  | none       | 0       | 0       |         |      |                          |          |
| 2        | CHIP0785 | STM/STY    | 1       | 1       | STM1968 | fliE | putative Flk             | STY2176  |
| 3        | CHIP0801 | STM/STY    | 1       | 1       | STM3172 | sufI | suppressor               | STY3349  |
| 4        | CHIP0817 | STM/STY    | 1       | 1       | STM2021 | cboQ | synthesis c              | STY2224  |
| 5        | CHIP2648 | STM/STY    | 1       | 1       | STM0086 | kefC | CPA2 fami                | STY0101  |
| 6        | CHIP2672 | STM/STY    | 1       | 1       | STM0141 | guaC | GMP reduc                | STY0163  |
| 7        | CHIP2666 | STM/STY    | 1       | 1       | STM0128 | murG | UDP-N-acε                | STY0148  |
| 8        | CHIP2682 | STM/STY    | 1       | 1       | STM0161 | kdgT | 2-keto-3-dε              | STY0183  |
| 9        | CHIP2698 | STM/STY    | 1       | 1       | STM0183 | folK | 7,8-dihydr               | STY0208  |
| 10       | CHIP2714 | STM/STY    | 1       | 1       | STM0215 | map  | methionine               | STY0238  |
| 11       | CHIP2730 | STM/STY    | 1       | 1       | STM0247 | abc  | putative AE              | STY0274  |
| 12       | CHIP2746 | STM/STY    | 1       | 0       | STM1532 |      | putative de              | STY1531  |
| 13       | CHIP3308 | STM/STY    | 1       | 1       | STM0685 | nagE | Sugar Spe                | STY0723  |
| 14       | CHIP3324 | STM/STY    | 1       | 1       | STM0711 | ybgI | putative cy              | STY0751  |
| 15       | CHIP0790 | STM/STY    | 1       | 1       | STM4456 | mgtA | P-type ATF               | STY4796  |
| 16       | CHIP0806 | STM/STY    | 1       | 1       | STM2032 | cbiD | synthesis c              | STY2237  |
| 17       | CHIP0822 | STM/STY    | 1       | 1       | STM1998 | umuD | error-prone              | STY2206  |
| 18       | CHIP0846 | STM/STY    | 1       | 1       | STM1004 | pncB | nicotinate ρ             | STY1010  |
| 19       | CHIP2583 | STM/STY    | 1       | 1       | STM3842 | yidC | putative Pr              | STY3938  |
| 20       | CHIP2599 | STM/STY    | 1       | 1       | STM3867 | atpA | membrane                 | STY3911  |
| 21       | CHIP2631 | STM/STY    | 1       | 1       | STM0050 |      | putative nit             | STY0059  |
| 22       | CHIP2655 | STM/STY    | 1       | 0       | STM0098 |      | putative se              | STY0113  |
| 23       | CHIP3247 | STM/STY    | 1       | 1       | STM3334 |      | putative cy              | STY3514  |
| 24       | CHIP3263 | STM/STY    | 1       | 1       | STM3370 | cafA | RNase G                  | STY3550  |
| 25       | CHIP3817 | STM/STY    | 1       | 1       | STM1098 | hpaC | 4-hydroxyp               | STY1130  |
| 26       | CHIP3833 | STM/STY    | 1       | 1       | STM1130 |      | putative inr             | STY1167  |
| 27       | CHIP3849 | STM/STY    | 1       | 1       | STM1168 | yceH | putative cy              | STY1206  |
| 28       | CHIP2425 | STM/STY    | 1       | 1       | STM3510 | yhgH | putative an              | STY4286  |
| 29       | CHIP2441 | STM specil | 1       | 0       | STM3532 |      | putative dihydrodipicoli |          |
| 30       | CHIP2457 | STM/STY    | 1       | 1       | STM3571 | ftsY | GTPase dc                | STY4240  |
| 31       | CHIP3851 | STM specil | 1       | 0       | STM1188 |      | putative inner membra    |          |
| 32       | CHIP2427 | STM/STY    | 1       | 1       | STM3515 | malT | transcriptio             | STY4281  |
| 33       | CHIP2443 | STM/STY    | 1       | 1       | STM3534 | glgP | glycogen p               | STY4276  |
| 34       | CHIP2459 | STM/STY    | 1       | 1       | STM3573 | yhhL | putative inr             | STY4238  |
| 35       | CHIP3724 | STM/STY    | 1       | 1       | STM4568 | deoA | thymidine ρ              | STY4919  |
| 36       | CHIP4036 | STM/STY    | 1       | 0       | STM2723 |      | Fels-2 proϕ              | STY4628  |
| 37       | CHIP2453 | STM/STY    | 1       | 1       | STM3556 | ugpA | ABC super                | STY4255  |
| 38       | CHIP3718 | STM/STY    | 1       | 1       | STM4547 | yjjQ | putative tra             | STY4900  |
| 39       | CHIP3734 | STM/STY    | 1       | 1       | STM4588 | creB | response r               | STY4935  |
| 40       | CHIP4046 | STM/STY    | 1       | 1       | STM2738 |      | Fels-2 proϕ              | STY4644  |
| 41       | CHIP4062 | STM specil | 1       | 0       | STM2755 |      | putative hexulose 6 ph   |          |

|    |          |            |   |   |         |      |                          |         |
|----|----------|------------|---|---|---------|------|--------------------------|---------|
| 42 | CHIP4078 | STM/STY    | 1 | 1 | STM2776 | iroE | putative hy              | STY2893 |
| 43 | CHIP4128 | STM/STY    | 1 | 1 | STM4103 |      | putative cy              | STY3766 |
| 44 | CHIP4152 | STM/STY    | 1 | 1 | STM2858 | hypE | putative hy              | STY2980 |
| 45 | CHIP4176 | STM/STY    | 1 | 1 | STM2927 | surE | survival prc             | STY3052 |
| 46 | CHIP3432 | STM/STY    | 1 | 1 | STM0882 | ybjF | putative tR              | STY0915 |
| 47 | CHIP3448 | STM specil | 1 | 0 | STM0904 |      | Fels-1 prophage          |         |
| 48 | CHIP3088 | STM/STY    | 1 | 1 | STM2489 | dapA | dihydrodipi              | STY2727 |
| 49 | CHIP3442 | STM specil | 1 | 0 | STM0898 |      | Fels-1 prophage; redic   |         |
| 50 | CHIP3082 | STM/STY    | 0 | 0 |         |      |                          |         |
| 51 | CHIP3482 | STM/STY    | 1 | 0 | STM0954 |      | putative inner membra    |         |
| 52 | CHIP3498 | STM/STY    | 1 | 1 | STM0983 | ycaI | putative re              | STY0984 |
| 53 | CHIP3523 | STM specil | 1 | 0 | STM1032 |      | Gifsy-2 prophage         |         |
| 54 | CHIP4115 | STM/STY    | 1 | 1 | STM4077 | yneA | putative AE              | STY3793 |
| 55 | CHIP4141 | STM/STY    | 1 | 1 | STM4119 | ppc  | phosphoen                | STY3754 |
| 56 | CHIP3597 | STM/STY    | 1 | 1 | STM4310 |      | putative inr             | STY4511 |
| 57 | CHIP3429 | STM/STY    | 1 | 1 | STM0877 | potF | ABC super                | STY0910 |
| 58 | CHIP3453 | STM specil | 1 | 0 | STM0910 |      | Fels-1 prophage          |         |
| 59 | CHIP3101 | STM/STY    | 1 | 1 | STM2523 | gcpE | putative prc             | STY2768 |
| 60 | CHIP3117 | STM/STY    | 1 | 1 | STM2552 |      | putative pe              | STY2799 |
| 61 | CHIP3487 | STM/STY    | 1 | 1 | STM0962 | ycaJ | paral putati             | STY0960 |
| 62 | CHIP3127 | STM/STY    | 1 | 1 | STM2575 |      | putative tra             | STY2821 |
| 63 | CHIP2960 | STM/STY    | 1 | 1 | STM1992 | dcm  | DNA cytosi               | STY2200 |
| 64 | CHIP2984 | STM/STY    | 1 | 1 | STM2270 | rcsB | response r               | STY2495 |
| 65 | CHIP3696 | STM/STY    | 1 | 1 | STM4514 | yjiH | putative inr             | STY4870 |
| 66 | CHIP2276 | STM/STY    | 1 | 1 | STM1108 | hpaA | 4-hydroxyp               | STY1142 |
| 67 | CHIP3026 | STM/STY    | 1 | 1 | STM2346 |      | putative N               | STY2576 |
| 68 | CHIP0203 | STM/STY    | 1 | 1 | STM1956 | fliA | sigma F (si              | STY2164 |
| 69 | CHIP0227 | STM specil | 1 | 0 | STM0195 | stfA | putative fimbrial subun  |         |
| 70 | CHIP2334 | STM/STY    | 1 | 1 | STM1166 | yceL | putative M               | STY1204 |
| 71 | CHIP2358 | STM/STY    | 1 | 1 | STM1368 |      | putative N               | STY1755 |
| 72 | CHIP3627 | STM/STY    | 1 | 1 | STM4376 | yjfC | putative glt             | STY4732 |
| 73 | CHIP0269 | STM/STY    | 1 | 1 | STM2862 | sitB | Salmonella               | STY2984 |
| 74 | CHIP2368 | STM/STY    | 1 | 1 | STM1451 | gst  | glutathionir             | STY1671 |
| 75 | CHIP2957 | STM/STY    | 1 | 1 | STM1988 |      | putative cy              | STY2195 |
| 76 | CHIP2973 | STM/STY    | 1 | 1 | STM2068 | yeeF | putative AF              | STY2277 |
| 77 | CHIP2997 | STM/STY    | 0 | 0 |         |      |                          |         |
| 78 | CHIP3013 | STM/STY    | 1 | 1 | STM2328 | nuoA | NADH deh                 | STY2558 |
| 79 | CHIP3663 | STM/STY    | 1 | 1 | STM4440 |      | putative cy              | STY4779 |
| 80 | CHIP3679 | STM specil | 1 | 0 | STM4488 |      | putative integrase       |         |
| 81 | CHIP3695 | STM/STY    | 1 | 1 | STM4506 |      | putative di              | STY4861 |
| 82 | CHIP3039 | STM/STY    | 1 | 1 | STM2370 | pdxB | erythronate              | STY2601 |
| 83 | CHIP0216 | STM/STY    | 1 | 1 | STM1257 |      | putative AE              | STY1863 |
| 84 | CHIP2315 | STM/STY    | 1 | 1 | STM1479 | pntA | pyridine nu              | STY1589 |
| 85 | CHIP1333 | STM/STY    | 1 | 1 | STM0316 | pepD | aminoacyl-               | STY0361 |
| 86 | CHIP1349 | STM/STY    | 1 | 1 | STM0164 |      | putative tra             | STY0186 |
| 87 | CHIP1365 | STM/STY    | 1 | 1 | STM0213 | dapD | 2,3,4,5-tetr             | STY0236 |
| 88 | CHIP1389 | STM/STY    | 1 | 1 | STM0130 | ddlB | D-alanine-I              | STY0150 |
| 89 | CHIP3906 | STM/STY    | 1 | 1 | STM1303 | astC | succinylorn              | STY1811 |
| 90 | CHIP3922 | STM/STY    | 1 | 1 | STM1338 | pheT | phenylalan               | STY1772 |
| 91 | CHIP3932 | STM specil | 1 | 0 | STM1354 | ydiQ | putative electron transf |         |
| 92 | CHIP0525 | STM/STY    | 1 | 1 | STM2146 | thiD | bifunctiona              | STY2375 |
| 93 | CHIP3972 | STM/STY    | 1 | 1 | STM1471 | rstB | sensory his              | STY1651 |

|     |          |            |   |   |         |      |                         |          |
|-----|----------|------------|---|---|---------|------|-------------------------|----------|
| 94  | CHIP0565 | STM/STY    | 1 | 1 | STM1418 | ssaQ | Secretion s             | STY1702  |
| 95  | CHIP1416 | STM/STY    | 1 | 1 | STM3863 |      | putative pe             | STY3915  |
| 96  | CHIP1344 | STM/STY    | 1 | 1 | STM0281 |      | putative cy             | STY0304  |
| 97  | CHIP1354 | STM/STY    | 1 | 1 | STM0219 | frr  | ribosome r              | STY0242  |
| 98  | CHIP1378 | STM/STY    | 1 | 1 | STM1982 | rcaA | positive tra            | STY2190  |
| 99  | CHIP1490 | STM/STY    | 1 | 1 | STM2402 | yfdZ | putative an             | STY2642  |
| 100 | CHIP1506 | STM/STY    | 1 | 1 | STM2317 | nuoM | NADH deh                | STY2547  |
| 101 | CHIP3927 | STM/STY    | 1 | 1 | STM1349 | pps  | phosphoen               | STY1761  |
| 102 | CHIP0536 | STM/STY    | 1 | 1 | STM2871 | prgK | cell invasio            | STY2992  |
| 103 | CHIP1541 | STM/STY    | 1 | 1 | STM2443 | cysU | ABC super               | STY2680  |
| 104 | CHIP1565 | STM/STY    | 1 | 1 | STM0503 | ybbM | putative Yb             | STY0549  |
| 105 | CHIP1042 | STM/STY    | 1 | 1 | STM4003 | yihI | putative cy             | STY3878  |
| 106 | CHIP1989 | STM/STY    | 1 | 1 | STM4348 | psd  | phosphatid              | STY4708  |
| 107 | CHIP3153 | STM specil | 1 | 0 | STM2609 |      | Gifsy-1 prophage: simi  |          |
| 108 | CHIP3177 | STM/STY    | 1 | 1 | STM3184 | yqiB | putative cy             | STY3362  |
| 109 | CHIP2063 | STM/STY    | 1 | 1 | STM3555 | ugpE | ABC super               | STY4256  |
| 110 | CHIP3227 | STM/STY    | 1 | 1 | STM3290 | argG | argininosuc             | STY3470  |
| 111 | CHIP1520 | STM/STY    | 1 | 1 | STM2349 | yfcG | putative glt            | STY2579  |
| 112 | CHIP1568 | STM/STY    | 1 | 1 | STM0512 | sfbC | putative bir            | STY0560  |
| 113 | CHIP1992 | STM/STY    | 1 | 1 | STM4396 | ytfB | putative ce             | STY4752  |
| 114 | CHIP2008 | STM/STY    | 1 | 1 | STM4481 | idnR | L-idonate r             | STY4819  |
| 115 | CHIP1602 | STM/STY    | 1 | 1 | STM2793 | gabP | APC family              | STY2913  |
| 116 | CHIP2010 | STM/STY    | 1 | 1 | STM4511 | yjiE | putative tra            | STY4867  |
| 117 | CHIP2026 | STM/STY    | 1 | 1 | STM4594 | sthA | putative fir            | STY4943  |
| 118 | CHIP2042 | STM/STY    | 1 | 1 | STM3657 |      | putative ou             | STY4142  |
| 119 | CHIP3206 | STM/STY    | 1 | 0 | STM3252 | agaR | aga operon transcriptic |          |
| 120 | CHIP3222 | STM specil | 1 | 0 | STM3278 |      | putative cytoplasmic pr |          |
| 121 | CHIP0618 | STM/STY    | 1 | 1 | STM4106 | katG | catalase; h             | STY3760  |
| 122 | CHIP0730 | STM/STY    | 1 | 1 | STM1824 | pabB | p-aminobe               | STY1954  |
| 123 | CHIP0762 | STM/STY    | 1 | 1 | STM0548 | fimF | putative fir            | STY0595  |
| 124 | CHIP1821 | STM/STY    | 1 | 1 | STM4027 | rbn  | tRNA proc               | STY3851  |
| 125 | CHIP1853 | STM/STY    | 1 | 1 | STM0630 | crcB | high-copy c             | STY0679  |
| 126 | CHIP1885 | STM/STY    | 1 | 1 | STM3407 | fmt  | 10-formylte             | STY4390  |
| 127 | CHIP0741 | STM/STY    | 1 | 1 | STM1244 | pagD | PhoP regul              | STY1880a |
| 128 | CHIP1800 | STM/STY    | 1 | 1 | STM4127 | yjiC | putative tra            | STY3747  |
| 129 | CHIP1840 | STM/STY    | 1 | 1 | STM0690 | citB | citrate utiliz          | STY0728  |
| 130 | CHIP1872 | STM/STY    | 1 | 1 | STM0732 | sdhC | succinate c             | STY0775  |
| 131 | CHIP0590 | STM/STY    | 1 | 1 | STM0977 | serC | 3-phospho               | STY0977  |
| 132 | CHIP0718 | STM/STY    | 1 | 1 | STM0584 | entD | enterocheli             | STY0627  |
| 133 | CHIP1891 | STM/STY    | 1 | 1 | STM3475 | nirD | nitrite redu            | STY4321  |
| 134 | CHIP0121 | STM/STY    | 1 | 1 | STM4163 | thiE | thiamin ph              | STY3722  |
| 135 | CHIP0137 | STM/STY    | 1 | 1 | STM3564 | livK | ABC super               | STY4248  |
| 136 | CHIP4736 | STM/STY    | 0 | 0 | STM2778 |      | pseudogene; frameshil   |          |
| 137 | CHIP1220 | STM/STY    | 1 | 1 | STM1623 |      | putative ca             | STY1441  |
| 138 | CHIP0409 | STM/STY    | 1 | 1 | STM1172 | flgM | anti-FlaA (a            | STY1211  |
| 139 | CHIP1278 | STM/STY    | 1 | 1 | STM3376 | yhdH | putative ox             | STY3556  |
| 140 | CHIP1294 | STM/STY    | 1 | 1 | STM0033 |      | putative 5'-            | STY0040  |
| 141 | CHIP4675 | STM/STY    | 1 | 1 | STM0083 |      | putative inr            | STY0096  |
| 142 | CHIP4691 | STM/STY    | 1 | 0 | STM1250 |      | putative cy             | STY1873  |
| 143 | CHIP0140 | STM/STY    | 1 | 1 | STM4021 | yihS | putative isc            | STY3857  |
| 144 | CHIP3354 | STM/STY    | 0 | 0 | STM3352 | oadA | putative so             | STY0064  |
| 145 | CHIP0166 | STM/STY    | 1 | 1 | STM0023 | bcfC | fimbrial us             | STY0026  |

|     |          |            |   |   |         |       |                    |         |
|-----|----------|------------|---|---|---------|-------|--------------------|---------|
| 146 | CHIP0182 | STM/STY    | 1 | 1 | STM2043 | pduG  | Propanedic         | STY2248 |
| 147 | CHIP1225 | STM/STY    | 1 | 1 | STM4300 | fumB  | fumarase E         | STY4499 |
| 148 | CHIP1241 | STM/STY    | 0 | 0 |         |       |                    | STY2138 |
| 149 | CHIP0430 | STM/STY    | 1 | 1 | STM2502 | ppx   | exopolyphc         | STY2743 |
| 150 | CHIP0454 | STM/STY    | 1 | 1 | STM4263 | yjcB  | putative inr       | STY4461 |
| 151 | CHIP1283 | STM/STY    | 1 | 1 | STM2671 | yfiR  | putative pe        | STY2858 |
| 152 | CHIP1299 | STM/STY    | 1 | 1 | STM0062 | citX2 | putative cyf       | STY0071 |
| 153 | CHIP1315 | STM/STY    | 1 | 1 | STM3798 | emrD  | MFS family         | STY3981 |
| 154 | CHIP0017 | STM/STY    | 1 | 1 | STM3970 | ubiE  | S-adenosyl         | STY3589 |
| 155 | CHIP0033 | STM/STY    | 1 | 1 | STM3954 | yigG  | putative inr       | STY3605 |
| 156 | CHIP1656 | STM/STY    | 1 | 1 | STM2086 | rfbU  | LPS side c         | STY2295 |
| 157 | CHIP3052 | STM/STY    | 1 | 1 | STM2393 | yfdC  | putative tra       | STY2625 |
| 158 | CHIP1710 | STM/STY    | 1 | 1 | STM1816 | minE  | cell divisor       | STY1946 |
| 159 | CHIP1726 | STM/STY    | 1 | 1 | STM1736 | ycaA  | putative Ac        | STY1315 |
| 160 | CHIP1742 | STM/STY    | 1 | 1 | STM2982 | gcvA  | regulator o        | STY3122 |
| 161 | CHIP1758 | STM/STY    | 1 | 1 | STM2914 |       | putative nu        | STY3039 |
| 162 | CHIP1774 | STM/STY    | 1 | 1 | STM4097 |       | putative ou        | STY3773 |
| 163 | CHIP0925 | STM/STY    | 1 | 1 | STM0578 | nfnB  | dihydropter        | STY0620 |
| 164 | CHIP1776 | STM/STY    | 1 | 1 | STM4091 | hslU  | ATPase co          | STY3779 |
| 165 | CHIP0192 | STM/STY    | 1 | 1 | STM2053 | pduS  | Propanedic         | STY2258 |
| 166 | CHIP0030 | STM/STY    | 1 | 1 | STM3957 | pldA  | outer mem          | STY3602 |
| 167 | CHIP0054 | STM/STY    | 1 | 1 | STM3928 | wecF  | TDP-Fuc4l          | STY3627 |
| 168 | CHIP2289 | STM/STY    | 1 | 1 | STM1263 |       | putative pe        | STY1858 |
| 169 | CHIP1731 | STM/STY    | 1 | 1 | STM3027 | stdC  | putative fir       | STY3175 |
| 170 | CHIP1747 | STM/STY    | 1 | 1 | STM2963 |       | putative Mf        | STY3102 |
| 171 | CHIP0936 | STM/STY    | 1 | 1 | STM0430 | phnR  | 2-aminoetr         | STY0469 |
| 172 | CHIP0960 | STM/STY    | 1 | 1 | STM3974 | tatB  | component          | STY3585 |
| 173 | CHIP4408 | STM/STY    | 1 | 1 | STM0516 | allR  | putative re        | STY0564 |
| 174 | CHIP4440 | STM specil | 1 | 0 | STM0574 |       | putative transport | prote   |
| 175 | CHIP4434 | STM/STY    | 1 | 1 | STM0564 |       | putative ox        | STY0612 |
| 176 | CHIP4458 | STM/STY    | 1 | 1 | STM0600 | cstA  | carbon sta         | STY0644 |
| 177 | CHIP1214 | STM/STY    | 1 | 1 | STM1614 |       | putative PT        | STY1450 |
| 178 | CHIP2762 | STM/STY    | 1 | 0 | STM1556 |       | putative Ne        | STY1508 |
| 179 | CHIP2786 | STM/STY    | 1 | 1 | STM1598 | ydcR  | putative re        | STY1466 |
| 180 | CHIP2810 | STM/STY    | 1 | 1 | STM1633 |       | putative pe        | STY1438 |
| 181 | CHIP2812 | STM/STY    | 1 | 1 | STM1635 |       | putative AE        | STY1436 |
| 182 | CHIP2932 | STM/STY    | 1 | 1 | STM1894 | ruvB  | Holliday jur       | STY2102 |
| 183 | CHIP4397 | STM/STY    | 1 | 1 | STM0492 | ybaL  | putative CF        | STY0536 |
| 184 | CHIP1153 | STM/STY    | 1 | 1 | STM0627 | dcuC  | DcuC famil         | STY0676 |
| 185 | CHIP1177 | STM/STY    | 1 | 1 | STM3769 |       | putative ph        | STY4016 |
| 186 | CHIP4461 | STM/STY    | 1 | 1 | STM0603 | ybdL  | putative an        | STY0647 |
| 187 | CHIP4455 | STM/STY    | 1 | 1 | STM0596 | entE  | 2,3-dihydr         | STY0640 |
| 188 | CHIP1211 | STM/STY    | 1 | 1 | STM2739 |       | Fels-2 pro         | STY4645 |
| 189 | CHIP2863 | STM/STY    | 1 | 1 | STM1750 | tdk   | thymidine k        | STY1301 |
| 190 | CHIP2783 | STM/STY    | 1 | 1 | STM1595 | srfC  | ssrAB activ        | STY1470 |
| 191 | CHIP2815 | STM/STY    | 1 | 1 | STM1641 | hrpA  | helicase, A        | STY1428 |
| 192 | CHIP2831 | STM/STY    | 1 | 1 | STM1668 |       | putative ou        | STY1396 |
| 193 | CHIP4665 | STM/STY    | 1 | 1 | STM4390 |       | putative cyf       | STY4746 |
| 194 | CHIP4298 | STM/STY    | 1 | 1 | STM2660 | clpB  | ATP-deper          | STY2849 |
| 195 | CHIP4226 | STM/STY    | 1 | 1 | STM3024 | yohM  | putative inr       | STY3169 |
| 196 | CHIP4338 | STM/STY    | 1 | 1 | STM0381 |       | putative inr       | STY0413 |
| 197 | CHIP4266 | STM specil | 1 | 0 | STM3119 |       | putative monoamine | o       |

|     |          |            |   |   |         |      |                          |         |
|-----|----------|------------|---|---|---------|------|--------------------------|---------|
| 198 | CHIP4378 | STM/STY    | 1 | 1 | STM0459 | ybaO | putative tra             | STY0502 |
| 199 | CHIP4612 | STM/STY    | 1 | 1 | STM3096 | yqgE | putative tra             | STY3249 |
| 200 | CHIP2516 | STM/STY    | 1 | 1 | STM3692 | lldP | LctP transp              | STY4104 |
| 201 | CHIP2556 | STM/STY    | 1 | 1 | STM3807 | yidE | paral putati             | STY3971 |
| 202 | CHIP4213 | STM/STY    | 1 | 1 | STM2993 | recD | exonucleas               | STY3131 |
| 203 | CHIP4229 | STM/STY    | 1 | 1 | STM3028 | stdB | putative ou              | STY3176 |
| 204 | CHIP4349 | STM/STY    | 1 | 1 | STM0402 |      | putative thi             | STY0440 |
| 205 | CHIP2479 | STM/STY    | 1 | 1 | STM3611 | yhjH | putative Di              | STY4192 |
| 206 | CHIP2495 | STM/STY    | 1 | 1 | STM3651 |      | putative ac              | STY4151 |
| 207 | CHIP2511 | STM/STY    | 1 | 1 | STM3682 | selB | selenocyste              | STY4114 |
| 208 | CHIP2527 | STM/STY    | 1 | 1 | STM3729 | radC | putative Di              | STY4065 |
| 209 | CHIP2543 | STM/STY    | 1 | 1 | STM3771 |      | putative ph              | STY4014 |
| 210 | CHIP4496 | STM/STY    | 1 | 1 | STM0704 | kdpC | P-type ATF               | STY0745 |
| 211 | CHIP1973 | STM/STY    | 1 | 1 | STM4564 | yjjV | putative hy              | STY4915 |
| 212 | CHIP1606 | STM/STY    | 1 | 1 | STM2813 | emrR | transcriptio             | STY2939 |
| 213 | CHIP1630 | STM/STY    | 1 | 1 | STM2130 | baeS | sensory kir              | STY2343 |
| 214 | CHIP1646 | STM/STY    | 1 | 1 | STM2216 | yejA | putative AE              | STY2452 |
| 215 | CHIP1662 | STM/STY    | 1 | 1 | STM2100 | wcaL | putative gly             | STY2310 |
| 216 | CHIP1678 | STM/STY    | 1 | 1 | STM2165 | yehZ | putative AE              | STY2395 |
| 217 | CHIP1640 | STM/STY    | 1 | 1 | STM2197 |      | putative ph              | STY2431 |
| 218 | CHIP4540 | STM specil | 1 | 0 | STM2230 |      | putative peptidase       |         |
| 219 | CHIP1680 | STM/STY    | 1 | 1 | STM2177 |      | putative flu             | STY2407 |
| 220 | CHIP1896 | STM/STY    | 1 | 1 | STM0933 | ybjT | putative nu              | STY0929 |
| 221 | CHIP2104 | STM/STY    | 1 | 1 | STM3642 | tag  | 3-methyl-a               | STY4160 |
| 222 | CHIP2120 | STM/STY    | 1 | 1 | STM3547 |      | putative tra             | STY4264 |
| 223 | CHIP2098 | STM/STY    | 1 | 1 | STM3669 | yiaL | putative cy              | STY4129 |
| 224 | CHIP2114 | STM/STY    | 1 | 1 | STM3580 |      | putative inr             | STY4231 |
| 225 | CHIP2130 | STM/STY    | 1 | 1 | STM3339 | nanA | N-acetyln                | STY3520 |
| 226 | CHIP2154 | STM/STY    | 1 | 1 | STM3238 | yhaN | putative inr             | STY3418 |
| 227 | CHIP2170 | STM/STY    | 1 | 1 | STM3141 |      | molybdenu                | STY3312 |
| 228 | CHIP1627 | STM/STY    | 1 | 1 | STM2852 | hycB | hydrogena                | STY2974 |
| 229 | CHIP2229 | STM/STY    | 1 | 1 | STM3203 | ygiM | putative S               | STY3382 |
| 230 | CHIP0362 | STM/STY    | 1 | 1 | STM1401 | sseD | Secretion s              | STY1719 |
| 231 | CHIP0378 | STM/STY    | 1 | 1 | STM1115 | scsC | Suppressic               | STY1151 |
| 232 | CHIP3353 | STM specil | 1 | 0 | STM0765 |      | putative cation transpo  |         |
| 233 | CHIP3401 | STM/STY    | 1 | 1 | STM0835 |      | putative Mr              | STY0876 |
| 234 | CHIP0307 | STM/STY    | 1 | 1 | STM1387 | ttrR | Tetrathion               | STY1733 |
| 235 | CHIP3356 | STM/STY    | 1 | 1 | STM0772 | gpmA | phosphogly               | STY0804 |
| 236 | CHIP3388 | STM/STY    | 1 | 1 | STM0816 | ybhS | putative AE              | STY0851 |
| 237 | CHIP3420 | STM/STY    | 1 | 0 | STM0861 | ylil | putative de              | STY0894 |
| 238 | CHIP2201 | STM/STY    | 1 | 1 | STM3316 | yrbl | putative pr              | STY3495 |
| 239 | CHIP0334 | STM/STY    | 1 | 1 | STM1973 | fliJ | flagellar fli            | STY2181 |
| 240 | CHIP2241 | STM/STY    | 1 | 1 | STM3140 | yghU | putative gl              | STY3311 |
| 241 | CHIP3383 | STM/STY    | 1 | 0 | STM0809 |      | putative inner membra    |         |
| 242 | CHIP3415 | STM specil | 1 | 0 | STM0856 |      | putative electron transf |         |
| 243 | CHIP3648 | STM specil | 1 | 0 | STM4421 |      | putative NAD-depende     |         |
| 244 | CHIP3664 | STM/STY    | 1 | 1 | STM4441 |      | putative cy              | STY4780 |
| 245 | CHIP4362 | STM/STY    | 1 | 1 | STM0436 | yajR | putative M               | STY0475 |
| 246 | CHIP3649 | STM specil | 1 | 0 | STM4422 |      | putative cytoplasmic pr  |         |
| 247 | CHIP4459 | STM/STY    | 1 | 1 | STM0601 | ybdD | putative cy              | STY0645 |
| 248 | CHIP4413 | STM/STY    | 1 | 0 | STM0521 | ybbV | putative cytoplasmic pr  |         |
| 249 | CHIP4430 | STM/STY    | 1 | 0 | STM0556 |      | putative tra             | STY0603 |

|     |          |            |   |   |              |                          |          |
|-----|----------|------------|---|---|--------------|--------------------------|----------|
| 250 | CHIP4446 | STM/STY    | 1 | 1 | STM0581      | putative re              | STY0624  |
| 251 | CHIP4447 | STM/STY    | 1 | 1 | STM0582 ybdJ | putative inr             | STY0625  |
| 252 | CHIP1721 | STM/STY    | 1 | 1 | STM1787      | hydrogena                | STY1914  |
| 253 | CHIP4632 | STM specif | 1 | 0 | STM0334      | putative cytoplasmic pr  |          |
| 254 | CHIP4650 | STM specif | 1 | 0 | STM2507      | putative inner membra    |          |
| 255 | CHIP4651 | STM/STY    | 1 | 1 | STM2279 yfaE | putative fer             | STY2508  |
| 256 | CHIP2165 | STM/STY    | 1 | 1 | STM3151 yghW | putative cy              | STY3323  |
| 257 | CHIP1124 | STM/STY    | 1 | 1 | STM0885      | putative inr             | STY0918  |
| 258 | CHIP1148 | STM/STY    | 1 | 1 | STM0614 ybdQ | putative Ur              | STY0662  |
| 259 | CHIP2547 | STM/STY    | 1 | 1 | STM3778      | putative he              | STY4005  |
| 260 | CHIP2524 | STM/STY    | 1 | 1 | STM3708 tdh  | threonine 3              | STY4087  |
| 261 | CHIP2548 | STM/STY    | 1 | 1 | STM3779      | putative ph              | STY4004  |
| 262 | CHIP2557 | STM/STY    | 1 | 1 | STM3808 ibpB | small heat               | STY3970  |
| 263 | CHIP2559 | STM/STY    | 1 | 1 | STM3810 yidQ | putative ou              | STY3968  |
| 264 | CHIP2429 | STM specif | 1 | 0 | STM3517      | putative DNA-damage-     |          |
| 265 | CHIP4502 | STM/STY    | 1 | 0 | STM1120 ycdF | pseudogene; in-frame     |          |
| 266 | CHIP4602 | STM/STY    | 1 | 1 | STM4070      | putative cy              | STY3800  |
| 267 | CHIP4658 | STM/STY    | 1 | 0 | STM4124 oxyS | stable RNA induced by    |          |
| 268 | CHIP4667 | STM/STY    | 1 | 1 | STM4520      | putative cy              | STY4878  |
| 269 | CHIP4629 | STM/STY    | 1 | 0 | STM0467 ffs  | signal recognition parti |          |
| 270 | CHIP4638 | STM/STY    | 1 | 1 | STM1464 malY | pseudogen                | STY1657a |
| 271 | CHIP3395 | STM/STY    | 1 | 1 | STM0823 ybiJ | putative pe              | STY0860  |
| 272 | CHIP3288 | STM/STY    | 1 | 1 | STM0649      | putative hy              | STY0700  |
| 273 | CHIP2944 | STM/STY    | 1 | 1 | STM1934      | putative ou              | STY2142  |
| 274 | CHIP3028 | STM/STY    | 1 | 1 | STM2350 yfch | putative su              | STY2580  |
| 275 | CHIP0518 | STM specif | 1 | 0 | PSLT045 rlgA | putative resolvase       |          |
| 276 | CHIP1029 | STM specif | 0 | 0 | PSLT049      | putative DNA polymera    |          |
| 277 | CHIP0168 | STM specif | 1 | 0 | PSLT076 traY | conjugative transfer: or |          |
| 278 | CHIP0956 | STM specif | 1 | 0 | PSLT030      | putative cytoplasmic pr  |          |
| 279 | CHIP4620 | STM specif | 1 | 0 | PSLT047      | putative cytoplasmic pr  |          |
| 280 | CHIP1075 | STM specif | 1 | 0 | PSLT060      | putative cytoplasmic pr  |          |
| 281 | CHIP1054 | STM specif | 0 | 0 | PSLT020      | hypothetical protein     |          |
| 282 | CHIP0500 | none       | 0 | 0 | R460023 tral |                          |          |
| 283 | CHIP4777 | STM specif | 0 | 0 |              |                          |          |
| 284 | CHIP4781 | STM/STY    | 1 | 1 | STM2293      | putative nu              | STY2523  |
| 285 | CHIP4785 | STM/STY    | 0 | 0 |              |                          |          |
| 286 | CHIP4789 | STM/STY    | 0 | 0 |              |                          |          |
| 287 | CHIP4793 | STM/STY    | 0 | 0 |              |                          |          |
| 288 | CHIP4797 | STM/STY    | 0 | 0 |              |                          |          |
| 289 | CHIP4909 | STM/STY    | 0 | 0 |              |                          |          |
| 290 | CHIP4925 | STY specif | 0 | 1 |              |                          | STY0307  |
| 291 | CHIP4941 | STY specif | 0 | 1 |              |                          | STY0349  |
| 292 | CHIP4957 | STY specif | 0 | 1 |              |                          | STY1017  |
| 293 | CHIP4973 | STY specif | 0 | 1 |              |                          | STY1044  |
| 294 | CHIP4988 | STY specif | 0 | 1 |              |                          | STY1060  |
| 295 | CHIP4935 | STM/STY    | 0 | 0 |              |                          |          |
| 296 | CHIP4951 | STM/STY    | 0 | 1 |              |                          | STY0793  |
| 297 | CHIP4967 | STM/STY    | 0 | 0 |              |                          |          |
| 298 | CHIP5077 | STY specif | 0 | 1 |              |                          | STY2006  |
| 299 | CHIP5090 | STY specif | 0 | 1 |              |                          | STY2029  |
| 300 | CHIP5199 | STY specif | 0 | 1 |              |                          | STY3191  |
| 301 | CHIP4945 | STM/STY    | 0 | 1 |              |                          | STY0477  |

|     |          |            |   |   |              |                          |
|-----|----------|------------|---|---|--------------|--------------------------|
| 302 | CHIP4961 | STY specif | 0 | 1 |              | STY1026                  |
| 303 | CHIP4977 | STY specif | 0 | 0 |              | STY1048                  |
| 304 | CHIP4992 | STY specif | 0 | 1 |              | STY1064                  |
| 305 | CHIP5193 | STY specif | 0 | 1 |              | STY3089                  |
| 306 | CHIP5207 | STY specif | 0 | 1 |              | STY3288                  |
| 307 | CHIP4963 | STY specif | 0 | 1 |              | STY1028                  |
| 308 | CHIP4979 | STY specif | 0 | 0 |              | STY1050                  |
| 309 | CHIP4994 | STY specif | 0 | 1 |              | STY1066                  |
| 310 | CHIP5102 | STY specif | 0 | 1 |              | STY2042                  |
| 311 | CHIP5117 | STY specif | 0 | 1 |              | STY2058                  |
| 312 | CHIP5223 | STY specif | 0 | 1 |              | STY3659                  |
| 313 | CHIP5424 | STY specif | 0 | 1 |              | STY4838                  |
| 314 | CHIP5365 | STM/STY    | 0 | 0 |              |                          |
| 315 | CHIP5298 | STY specif | 0 | 1 |              | STY4522                  |
| 316 | CHIP5395 | STY specif | 0 | 1 |              | STY4669                  |
| 317 | CHIP5410 | STY specif | 0 | 1 |              | STY4822                  |
| 318 | CHIP5425 | STY specif | 0 | 1 |              | STY4842                  |
| 319 | CHIP5331 | STY specif | 0 | 1 |              | STY4570                  |
| 320 | CHIP5347 | STY specif | 0 | 1 |              | STY4587                  |
| 321 | CHIP5362 | STY specif | 0 | 1 |              | STY4609                  |
| 322 | CHIP5381 | STY specif | 0 | 1 |              | STY4649                  |
| 323 | CHIP5392 | STY specif | 0 | 1 |              | STY4666                  |
| 324 | CHIP5332 | STY specif | 0 | 1 |              | STY4571                  |
| 325 | CHIP2560 | STM/STY    | 1 | 1 | STM3811 yidR | putative cyf STY3967     |
| 326 | CHIP2576 | STM/STY    | 1 | 1 | STM3831 yidA | putative hy STY3947      |
| 327 | CHIP2592 | STM/STY    | 1 | 1 | STM3854 pstB | ABC super STY3929        |
| 328 | CHIP0825 | STM/STY    | 1 | 1 | STM3790 uhpA | response r1 STY3992      |
| 329 | CHIP3232 | STM/STY    | 1 | 1 | STM3302 yhbE | pseudogen STY3481        |
| 330 | CHIP3248 | STM/STY    | 1 | 0 | STM3337 nanE | putative Mε STY3518      |
| 331 | CHIP3242 | STM/STY    | 1 | 1 | STM3318 yhbN | putative AE STY3497      |
| 332 | CHIP3258 | STM/STY    | 1 | 1 | STM3356      | putative ca STY3536      |
| 333 | CHIP3274 | STM specif | 1 | 0 | STM3389 envR | transcriptional repress  |
| 334 | CHIP3290 | STM/STY    | 1 | 1 | STM0651      | putative pe STY0702      |
| 335 | CHIP3306 | STM/STY    | 1 | 1 | STM0683 nagA | N-acetylglu STY0721      |
| 336 | CHIP3322 | STM/STY    | 1 | 0 | STM0705 kdpB | P-type ATPase, high-a    |
| 337 | CHIP2740 | STM/STY    | 1 | 1 | STM1517 ydeD | putative pe STY1543      |
| 338 | CHIP0774 | STM specif | 1 | 0 | STM3638 lpfC | long polar fimbrial oute |
| 339 | CHIP2581 | STM/STY    | 1 | 1 | STM3840 rnpA | RNase P, ϕ STY3939       |
| 340 | CHIP2597 | STM/STY    | 1 | 0 | STM3859      | putative shikimate / qui |
| 341 | CHIP2613 | STM/STY    | 1 | 1 | STM0011 yaal | putative pe STY0011      |
| 342 | CHIP0854 | STM/STY    | 1 | 1 | STM1246 pagC | PhoP regul STY1878       |
| 343 | CHIP0800 | STM/STY    | 1 | 1 | STM2640 rpoE | sigma E (si STY2833      |
| 344 | CHIP2607 | STM/STY    | 1 | 1 | STM3885 rbsK | ribokinase STY3892       |
| 345 | CHIP2639 | STM/STY    | 1 | 1 | STM0068 caiF | transcriptio STY0078     |
| 346 | CHIP2663 | STM/STY    | 1 | 1 | STM0122 ftsI | division spε STY0142     |
| 347 | CHIP2679 | STM/STY    | 1 | 1 | STM0157 yacH | putative ou STY0180      |
| 348 | CHIP3271 | STM/STY    | 1 | 1 | STM3386 yhdJ | putative mε STY3566      |
| 349 | CHIP2377 | STM/STY    | 1 | 1 | STM1491      | ABC-type ϕ STY1573       |
| 350 | CHIP2393 | STM/STY    | 1 | 1 | STM3449 yheL | putative ox STY4349      |
| 351 | CHIP3857 | STM/STY    | 1 | 1 | STM1201 holB | DNA polymr STY1240       |
| 352 | CHIP3873 | STM/STY    | 1 | 1 | STM1229 ycfD | putative cyf STY1269     |
| 353 | CHIP3889 | STM/STY    | 1 | 1 | STM1274 yeaQ | putative inr STY1846     |

|     |          |            |   |   |         |      |                          |         |
|-----|----------|------------|---|---|---------|------|--------------------------|---------|
| 354 | CHIP4002 | STM/STY    | 1 | 1 | STM2102 | wzxC | putative ex              | STY2314 |
| 355 | CHIP2411 | STM/STY    | 1 | 1 | STM3488 | hofQ | putative tra             | STY4308 |
| 356 | CHIP3875 | STM/STY    | 1 | 1 | STM1235 | ymfB | putative Mt              | STY1275 |
| 357 | CHIP3891 | STM/STY    | 1 | 1 | STM1276 |      | putative pe              | STY1842 |
| 358 | CHIP4004 | STM/STY    | 1 | 1 | STM2105 | manC | mannose-1                | STY2317 |
| 359 | CHIP4020 | STM/STY    | 1 | 1 | STM2134 |      | putative inr             | STY2347 |
| 360 | CHIP4052 | STM specil | 1 | 0 | STM2745 |      | putative inner membra    |         |
| 361 | CHIP3901 | STM/STY    | 1 | 1 | STM1290 | gapA | glyceraldel              | STY1825 |
| 362 | CHIP4014 | STM/STY    | 1 | 1 | STM2123 | yegE | putative P <sup>A</sup>  | STY2336 |
| 363 | CHIP3742 | STM/STY    | 1 | 1 | STM0008 | mog  | putative m $\alpha$      | STY0008 |
| 364 | CHIP3758 | STM/STY    | 1 | 1 | STM0287 |      | putative pe              | STY0316 |
| 365 | CHIP3774 | STM/STY    | 1 | 1 | STM0314 |      | pseudogen                | STY0359 |
| 366 | CHIP3790 | STM specil | 0 | 0 | STM1047 |      | Gifsy-2 prophage; prot   |         |
| 367 | CHIP4136 | STM specil | 1 | 0 | STM4114 | pfID | putative pyruvate form:  |         |
| 368 | CHIP3584 | STM/STY    | 1 | 0 | STM4281 | nrfE | formate-de               | STY4479 |
| 369 | CHIP4184 | STM specil | 1 | 0 | STM2939 | ygCH | putative cytoplasmic pr  |         |
| 370 | CHIP3056 | STM/STY    | 1 | 1 | STM2404 |      | putative ch              | STY2645 |
| 371 | CHIP3072 | STM/STY    | 1 | 1 | STM2448 | yfeZ | putative inr             | STY2685 |
| 372 | CHIP3472 | STM specil | 1 | 0 | STM0929 |      | putative inner membra    |         |
| 373 | CHIP3450 | STM specil | 1 | 0 | STM0906 |      | Fels-1 prophage          |         |
| 374 | CHIP3466 | STM specil | 0 | 0 |         |      |                          |         |
| 375 | CHIP3106 | STM/STY    | 1 | 1 | STM2530 |      | putative an              | STY2775 |
| 376 | CHIP3122 | STM/STY    | 1 | 1 | STM2563 | yfhG | putative tra             | STY2810 |
| 377 | CHIP4099 | STM/STY    | 1 | 1 | STM4030 |      | putative cy <sup>I</sup> | STY3848 |
| 378 | CHIP3547 | STM specil | 1 | 0 | STM4205 |      | putative phage glycosy   |         |
| 379 | CHIP4149 | STM/STY    | 1 | 1 | STM2854 | hypA | guanine-nu               | STY2976 |
| 380 | CHIP4181 | STM/STY    | 1 | 1 | STM2935 | cysD | ATP-sulfur               | STY3060 |
| 381 | CHIP3437 | STM specil | 1 | 0 | STM0893 |      | Fels-1 prophage; putat   |         |
| 382 | CHIP3077 | STM/STY    | 1 | 1 | STM2473 | talA | transaldola              | STY2710 |
| 383 | CHIP3485 | STM/STY    | 1 | 1 | STM0958 | trxB | thioredoxin              | STY0956 |
| 384 | CHIP3501 | STM/STY    | 1 | 1 | STM0988 | kdsB | CTP:CMp-                 | STY0990 |
| 385 | CHIP3495 | STM/STY    | 1 | 1 | STM0975 | ycaO | putative cy <sup>I</sup> | STY0975 |
| 386 | CHIP3135 | STM specil | 0 | 0 | STM2591 |      | Gifsy-1 prophage: simi   |         |
| 387 | CHIP3640 | STM/STY    | 1 | 1 | STM4406 | ytfK | putative cy <sup>I</sup> | STY4764 |
| 388 | CHIP2992 | STM/STY    | 1 | 1 | STM2283 | glpT | MFS family               | STY2512 |
| 389 | CHIP3024 | STM/STY    | 1 | 1 | STM2343 |      | putative cy <sup>I</sup> | STY2573 |
| 390 | CHIP0201 | STM/STY    | 1 | 1 | STM1923 | motA | proton con <sup>I</sup>  | STY2132 |
| 391 | CHIP3034 | STM/STY    | 1 | 1 | STM2364 | dedD | paral putati             | STY2595 |
| 392 | CHIP2286 | STM/STY    | 1 | 1 | STM1219 | ycfW | ABC trans $\gamma$       | STY1259 |
| 393 | CHIP2310 | STM/STY    | 1 | 1 | STM1426 | ribE | riboflavin s             | STY1696 |
| 394 | CHIP2342 | STM/STY    | 1 | 0 | STM1237 | ymfC | putative rib             | STY1277 |
| 395 | CHIP0283 | STM/STY    | 1 | 1 | STM0025 | bcfE | fimbrial sut             | STY0030 |
| 396 | CHIP2955 | STM/STY    | 1 | 1 | STM1986 | yedP | putative hy              | STY2193 |
| 397 | CHIP2352 | STM/STY    | 1 | 1 | STM1325 | ydiZ | putative cy <sup>I</sup> | STY1786 |
| 398 | CHIP3621 | STM/STY    | 1 | 1 | STM4368 | vacB | putativevea e            | STY4725 |
| 399 | CHIP3637 | STM/STY    | 1 | 1 | STM4401 | ytfG | paral putati             | STY4759 |
| 400 | CHIP3653 | STM specil | 1 | 0 | STM4426 | srfJ | activated by transcripti |         |
| 401 | CHIP3677 | STM specil | 1 | 0 | STM4485 | idnK | D-gluconate kinase, th   |         |
| 402 | CHIP3693 | STM/STY    | 1 | 1 | STM4502 |      | putative cy <sup>I</sup> | STY4858 |
| 403 | CHIP2991 | STM/STY    | 1 | 1 | STM2281 |      | putative tra             | STY2510 |
| 404 | CHIP3007 | STM specil | 1 | 0 | STM2315 | yfbK | putative von Willebranc  |         |
| 405 | CHIP3023 | STM/STY    | 1 | 1 | STM2342 |      | putative inr             | STY2572 |



|     |          |            |   |   |         |      |                         |         |
|-----|----------|------------|---|---|---------|------|-------------------------|---------|
| 406 | CHIP0200 | STM/STY    | 1 | 1 | STM1924 | flhC | regulator o             | STY2133 |
| 407 | CHIP0224 | STM/STY    | 1 | 1 | STM2701 |      | Fels-2 pro              | STY4607 |
| 408 | CHIP0240 | STM/STY    | 1 | 1 | STM2467 | eutT | putative co             | STY2703 |
| 409 | CHIP1429 | STM/STY    | 1 | 1 | STM2654 | kgtP | MFS family              | STY2847 |
| 410 | CHIP1445 | STM/STY    | 1 | 1 | STM0361 |      | cytochrom               | STY0393 |
| 411 | CHIP1373 | STM/STY    | 1 | 1 | STM2017 | cobS | cobalamin               | STY2220 |
| 412 | CHIP1485 | STM/STY    | 1 | 1 | STM4220 | lysC | aspartokin              | STY4416 |
| 413 | CHIP0483 | STM/STY    | 1 | 1 | STM2818 | gshA | gamma-glt               | STY2944 |
| 414 | CHIP3930 | STM specil | 1 | 0 | STM1352 | ydiS | flavoprotein            |         |
| 415 | CHIP0509 | STM/STY    | 1 | 1 | STM1979 | fliP | flagellar bic           | STY2187 |
| 416 | CHIP0533 | STM/STY    | 1 | 1 | STM2874 | prgH | cell invasio            | STY2995 |
| 417 | CHIP0549 | STM/STY    | 1 | 1 | STM1913 | flhA | flagellar bic           | STY2122 |
| 418 | CHIP3996 | STM/STY    | 1 | 1 | STM2093 | rfbl | LPS side c              | STY2303 |
| 419 | CHIP1424 | STM/STY    | 1 | 1 | STM3881 | rbsD | D-ribose hi             | STY3897 |
| 420 | CHIP1352 | STM/STY    | 1 | 1 | STM0217 | tsf  | protein cha             | STY0240 |
| 421 | CHIP1450 | STM/STY    | 1 | 1 | STM0384 | psiF | induced by              | STY0417 |
| 422 | CHIP1474 | STM/STY    | 1 | 1 | STM4193 | yjbC | putative ps             | STY4410 |
| 423 | CHIP1402 | STM/STY    | 1 | 1 | STM0074 | caiT | putative BC             | STY0084 |
| 424 | CHIP3911 | STM/STY    | 1 | 1 | STM1309 |      | putative nu             | STY1804 |
| 425 | CHIP3935 | STM specil | 1 | 0 | STM1357 | ydiF | putative acetyl-CoA:ac  |         |
| 426 | CHIP3967 | STM/STY    | 1 | 1 | STM1463 | add  | adenosine               | STY1658 |
| 427 | CHIP1002 | STM/STY    | 0 | 0 | STM1017 |      | Gifsy-2 pro             | STY1025 |
| 428 | CHIP1026 | STM/STY    | 1 | 1 | STM4473 | yjgM | putative ac             | STY4812 |
| 429 | CHIP1589 | STM/STY    | 1 | 1 | STM0542 | folD | bifunctiona             | STY0588 |
| 430 | CHIP3137 | STM specil | 1 | 0 | STM2593 |      | Gifsy-1 prophage: simi  |         |
| 431 | CHIP2021 | STM/STY    | 1 | 1 | STM4565 | yjjW | pyruvate fo             | STY4916 |
| 432 | CHIP2037 | STM/STY    | 1 | 1 | STM3701 | secB | molecular               | STY4094 |
| 433 | CHIP2071 | STM/STY    | 1 | 1 | STM3509 | bioH | putative hy             | STY4287 |
| 434 | CHIP0965 | STM specil | 1 | 0 | STM4157 |      | putative cytoplasmic pr |         |
| 435 | CHIP0981 | STM/STY    | 1 | 1 | STM1774 | sirC | Regulation              | STY1899 |
| 436 | CHIP1584 | STM/STY    | 1 | 1 | STM0513 | ybbB | putative AT             | STY0561 |
| 437 | CHIP3140 | STM specil | 1 | 0 | STM2596 |      | Gifsy-1 prophage: simi  |         |
| 438 | CHIP3156 | STM specil | 0 | 0 | STM1028 |      | Gifsy-2 prophage; lyso: |         |
| 439 | CHIP1994 | STM/STY    | 1 | 1 | STM4400 | ytfF | putative ca             | STY4758 |
| 440 | CHIP3158 | STM specil | 0 | 0 |         |      |                         |         |
| 441 | CHIP3174 | STM/STY    | 1 | 1 | STM2655 |      | putative cy             | STY2848 |
| 442 | CHIP3190 | STM/STY    | 1 | 1 | STM3206 | folB | dihydroneo              | STY3385 |
| 443 | CHIP2066 | STM/STY    | 1 | 1 | STM3535 | glgA | glycogen s              | STY4275 |
| 444 | CHIP2082 | STM/STY    | 1 | 1 | STM3738 | yigC | putative inr            | STY4056 |
| 445 | CHIP0714 | STM/STY    | 1 | 1 | STM2548 | asrA | anaerobic               | STY2794 |
| 446 | CHIP0642 | STM/STY    | 1 | 1 | STM1203 | ptsG | Sugar Spe               | STY1242 |
| 447 | CHIP1797 | STM/STY    | 1 | 1 | STM4001 | yihA | putative G              | STY3880 |
| 448 | CHIP1829 | STM/STY    | 1 | 1 | STM0831 | dps  | stress resp             | STY0870 |
| 449 | CHIP1861 | STM/STY    | 1 | 1 | STM0802 | moaA | molybdopt               | STY0836 |
| 450 | CHIP0579 | STM/STY    | 1 | 1 | STM1421 | ssaT | Secretion               | STY1699 |
| 451 | CHIP0757 | STM/STY    | 1 | 1 | STM2454 | eutR | putative re             | STY2691 |
| 452 | CHIP1808 | STM/STY    | 1 | 1 | STM4074 | ego  | putative AE             | STY3796 |
| 453 | CHIP1848 | STM/STY    | 1 | 1 | STM0642 | ybeB | putative AC             | STY0693 |
| 454 | CHIP1880 | STM/STY    | 1 | 1 | STM0267 |      | putative cy             | STY0288 |
| 455 | CHIP0694 | STM/STY    | 1 | 1 | STM2073 | hisC | histidinol pl           | STY2282 |
| 456 | CHIP0630 | STM/STY    | 1 | 1 | STM1696 | sapF | ABC super               | STY1355 |
| 457 | CHIP0097 | STM/STY    | 1 | 1 | STM0385 | yaiC | putative di             | STY0418 |

|     |          |            |   |   |         |                       |                          |         |
|-----|----------|------------|---|---|---------|-----------------------|--------------------------|---------|
| 458 | CHIP4704 | STM/STY    | 1 | 1 | STM1810 | putative cy           | STY1940                  |         |
| 459 | CHIP4720 | STM/STY    | 1 | 0 | STM2132 | pseudogene; frameshil |                          |         |
| 460 | CHIP0161 | STM/STY    | 1 | 1 | STM0669 | phoL                  | putative ph              | STY0715 |
| 461 | CHIP1228 | STM/STY    | 1 | 1 | STM4289 | phnA                  | putative alk             | STY4488 |
| 462 | CHIP1244 | STM/STY    | 1 | 1 | STM1908 | yecM                  | putative cy              | STY2116 |
| 463 | CHIP0451 | STM/STY    | 1 | 1 | STM4261 |                       | putative inr             | STY4459 |
| 464 | CHIP0467 | STM/STY    | 1 | 1 | STM3717 | rfaJ                  | UDP-D-glu                | STY4078 |
| 465 | CHIP0100 | STM/STY    | 1 | 1 | STM1855 | sopE2                 | TypeIII-sec              | STY1987 |
| 466 | CHIP0124 | STM/STY    | 1 | 1 | STM4167 | hemE                  | uroporphyr               | STY3718 |
| 467 | CHIP0156 | STM/STY    | 1 | 1 | STM3866 | atpG                  | membrane                 | STY3912 |
| 468 | CHIP0172 | STM/STY    | 1 | 1 | STM2267 | ompC                  | outer mem                | STY2493 |
| 469 | CHIP3385 | STM/STY    | 1 | 1 | STM0812 | ybhO                  | cardiolipin              | STY0847 |
| 470 | CHIP4356 | STM/STY    | 1 | 1 | STM0415 | ybaD                  | putative tra             | STY0453 |
| 471 | CHIP0398 | STM/STY    | 1 | 1 | STM4055 | sodA                  | superoxide               | STY3816 |
| 472 | CHIP0414 | STM/STY    | 1 | 1 | STM2063 | phsC                  | Hydrogen ε               | STY2269 |
| 473 | CHIP1265 | STM/STY    | 1 | 1 | STM1690 | pspA                  | phage shor               | STY1371 |
| 474 | CHIP1289 | STM/STY    | 1 | 1 | STM2681 | grpE                  | molecular c              | STY2868 |
| 475 | CHIP0456 | STM/STY    | 1 | 1 | STM3423 | rpsE                  | 30S riboso               | STY4375 |
| 476 | CHIP0472 | STM/STY    | 1 | 1 | STM3723 | rfaQ                  | lipopolysac              | STY4071 |
| 477 | CHIP0001 | STM/STY    | 1 | 1 | STM3987 | hemG                  | protoporph               | STY3573 |
| 478 | CHIP0461 | STM/STY    | 1 | 1 | STM2583 | lepA                  | GTP-bindir               | STY2829 |
| 479 | CHIP0041 | STM/STY    | 1 | 1 | STM3946 | yifL                  | putative ou              | STY3613 |
| 480 | CHIP0065 | STM/STY    | 1 | 1 | STM3917 | rho                   | transcriptio             | STY3638 |
| 481 | CHIP0867 | STM/STY    | 1 | 1 | STM1977 | fliN                  | flagellar bic            | STY2185 |
| 482 | CHIP0883 | STM/STY    | 1 | 1 | STM1802 | dadX                  | alanine rac              | STY1930 |
| 483 | CHIP0899 | STM/STY    | 1 | 1 | STM2384 | aroC                  | chorismate               | STY2616 |
| 484 | CHIP0915 | STM/STY    | 1 | 1 | STM2324 | nuoF                  | NADH deh                 | STY2554 |
| 485 | CHIP0931 | STM/STY    | 1 | 1 | STM3733 | pyrE                  | orotate phc              | STY4061 |
| 486 | CHIP0947 | STM/STY    | 1 | 1 | STM2700 |                       | Fels-2 proç              | STY4606 |
| 487 | CHIP1760 | STM/STY    | 1 | 1 | STM2890 | spaP                  | surface pre              | STY3013 |
| 488 | CHIP1784 | STM/STY    | 1 | 1 | STM4046 | rhaA                  | L-rhamnos                | STY3827 |
| 489 | CHIP0014 | STM/STY    | 1 | 1 | STM3973 | tatA                  | component                | STY3586 |
| 490 | CHIP0852 | STM/STY    | 1 | 1 | STM3174 | parC                  | DNA topoiε               | STY3351 |
| 491 | CHIP1518 | STM/STY    | 1 | 1 | STM2409 | nupC                  | NUP family               | STY2650 |
| 492 | CHIP0078 | STM/STY    | 1 | 1 | STM3901 | ilvG                  | acetolactat              | STY3656 |
| 493 | CHIP0904 | STM/STY    | 1 | 1 | STM0101 | araD                  | L-ribulose-!             | STY0118 |
| 494 | CHIP1755 | STM/STY    | 1 | 0 | STM2933 | cysC                  | adenosine                | STY3058 |
| 495 | CHIP1771 | STM/STY    | 1 | 1 | STM2921 |                       | putative fla             | STY3046 |
| 496 | CHIP1795 | STM/STY    | 1 | 1 | STM4010 |                       | putative hy              | STY3870 |
| 497 | CHIP4416 | STM/STY    | 1 | 1 | STM0525 | glxK                  | glycerate k              | STY0573 |
| 498 | CHIP1180 | STM/STY    | 0 | 0 | STM0965 | dmsB                  | anaerobic c              | STY0963 |
| 499 | CHIP4442 | STM specil | 1 | 0 | STM0576 |                       | putative transport prote |         |
| 500 | CHIP1198 | STM/STY    | 1 | 1 | STM1637 |                       | putative inr             | STY1434 |
| 501 | CHIP2850 | STM/STY    | 1 | 1 | STM1714 | topA                  | DNA topoiε               | STY1336 |
| 502 | CHIP2770 | STM specil | 1 | 0 | STM1568 | fdnI                  | formate dehydrogenas     |         |
| 503 | CHIP2890 | STM/STY    | 1 | 1 | STM1817 | rnd                   | RNase D, ρ               | STY1947 |
| 504 | CHIP2818 | STM/STY    | 1 | 1 | STM1647 | ldhA                  | fermentativ              | STY1422 |
| 505 | CHIP2916 | STM/STY    | 1 | 1 | STM1864 |                       | putative inr             | STY2002 |
| 506 | CHIP2836 | STM/STY    | 1 | 1 | STM1674 |                       | putative ba              | STY1390 |
| 507 | CHIP1137 | STM/STY    | 1 | 1 | STM1895 | ruvA                  | Holliday jur             | STY2103 |
| 508 | CHIP4421 | STM/STY    | 1 | 1 | STM0534 | purE                  | phosphorib               | STY0582 |
| 509 | CHIP4445 | STM/STY    | 1 | 1 | STM0580 |                       | putative reç             | STY0622 |

|     |          |            |   |   |         |      |                          |          |
|-----|----------|------------|---|---|---------|------|--------------------------|----------|
| 510 | CHIP1201 | STM/STY    | 1 | 1 | STM1654 | ydaO | putative AT              | STY1412  |
| 511 | CHIP1195 | STM/STY    | 1 | 1 | STM1583 |      | putative cy              | STY1482  |
| 512 | CHIP4479 | STM/STY    | 1 | 1 | STM0343 |      | putative Di              | STY0376  |
| 513 | CHIP2871 | STM/STY    | 1 | 1 | STM1769 | ychn | putative AC              | STY1283  |
| 514 | CHIP2791 | STM/STY    | 1 | 1 | STM1606 |      | putative be              | STY1458  |
| 515 | CHIP2919 | STM specil | 1 | 0 | STM1871 |      | putative phage integras  |          |
| 516 | CHIP2935 | STM/STY    | 1 | 1 | STM1898 | ruvC | Holliday jur             | STY2106  |
| 517 | CHIP2553 | STM/STY    | 1 | 1 | STM3802 | dsdA | D-serine dε              | STY3977  |
| 518 | CHIP4210 | STM/STY    | 1 | 1 | STM2987 | ygdL | paral putati             | STY3127  |
| 519 | CHIP4322 | STM specil | 1 | 0 | STM2705 |      | Fels-2 prophage          |          |
| 520 | CHIP4250 | STM specil | 1 | 0 | STM3084 |      | putative regulatory prot |          |
| 521 | CHIP4274 | STM/STY    | 1 | 0 | STM3133 |      | putative an              | STY3303  |
| 522 | CHIP4578 | STM/STY    | 1 | 1 | STM3914 | rhIB | putative he              | STY3640  |
| 523 | CHIP2500 | STM/STY    | 1 | 1 | STM3661 | xylA | D-xylose is              | STY4137  |
| 524 | CHIP4636 | STM/STY    | 1 | 0 | STM1186 |      | pseudogen                | STY1226a |
| 525 | CHIP4197 | STM/STY    | 1 | 1 | STM2968 | yqcD | putative G               | STY3107  |
| 526 | CHIP4309 | STM/STY    | 1 | 1 | STM2687 | yfjG | putative Ol              | STY2873  |
| 527 | CHIP4237 | STM/STY    | 1 | 1 | STM3053 | gcvP | glycine cle              | STY3209  |
| 528 | CHIP4261 | STM/STY    | 1 | 1 | STM3106 | ansB | periplasmic              | STY3259  |
| 529 | CHIP4599 | STM/STY    | 1 | 1 | STM4131 | murl | glutamate i              | STY3743  |
| 530 | CHIP4615 | STM/STY    | 1 | 1 | STM3109 | yggH | putative S-              | STY3264  |
| 531 | CHIP4631 | STM/STY    | 1 | 0 | STM0618 | citT | DASS fami                | STY0667  |
| 532 | CHIP4647 | STM/STY    | 0 | 0 |         |      |                          | STY2447  |
| 533 | CHIP1604 | STM/STY    | 1 | 1 | STM2797 |      | putative re              | STY2917  |
| 534 | CHIP4504 | STM/STY    | 1 | 1 | STM1691 | pspF | transcriptio             | STY1370  |
| 535 | CHIP1981 | STM/STY    | 1 | 1 | STM3039 | idi  | isopenteny               | STY3195  |
| 536 | CHIP4490 | STM/STY    | 1 | 1 | STM0365 | yahN | paral putati             | STY0397  |
| 537 | CHIP4514 | STM/STY    | 1 | 1 | STM3653 |      | putative ac              | STY4148  |
| 538 | CHIP4530 | STM/STY    | 1 | 1 | STM2202 | yeiH | putative inr             | STY2437  |
| 539 | CHIP4546 | STM specil | 1 | 0 | STM2237 |      | putative inner membra    |          |
| 540 | CHIP4562 | STM/STY    | 1 | 1 | STM2159 | yehU | paral putati             | STY2389  |
| 541 | CHIP4524 | STM/STY    | 1 | 1 | STM2194 | yeiG | putative es              | STY2428  |
| 542 | CHIP1664 | STM/STY    | 1 | 1 | STM2106 | wcal | putative gly             | STY2318  |
| 543 | CHIP4564 | STM/STY    | 1 | 1 | STM2164 | yehY | putative AE              | STY2394  |
| 544 | CHIP2088 | STM/STY    | 1 | 1 | STM3694 | lldD | L-lactate dε             | STY4102  |
| 545 | CHIP1920 | STM/STY    | 1 | 1 | STM3440 | rplC | 50S riboso               | STY4358  |
| 546 | CHIP1936 | STM/STY    | 1 | 1 | STM4358 | amiB | N-acetylmt               | STY4715  |
| 547 | CHIP1914 | STM/STY    | 1 | 1 | STM3433 | rplP | 50S riboso               | STY4365  |
| 548 | CHIP1930 | STM/STY    | 1 | 1 | STM3038 |      | putative mε              | STY3194  |
| 549 | CHIP1946 | STM/STY    | 1 | 1 | STM4380 | yjfP | putative hy              | STY4736  |
| 550 | CHIP1970 | STM/STY    | 1 | 1 | STM4548 | bglJ | transcriptio             | STY4901  |
| 551 | CHIP1986 | STM/STY    | 1 | 1 | STM4333 | yjeK | putative an              | STY4693  |
| 552 | CHIP1635 | STM/STY    | 1 | 1 | STM2156 | yehR | putative lip             | STY2385  |
| 553 | CHIP0346 | STM/STY    | 1 | 1 | STM0666 | Int  | apolipoprot              | STY0711  |
| 554 | CHIP2253 | STM/STY    | 1 | 1 | STM3092 | sprT | putative cy              | STY3245  |
| 555 | CHIP2269 | STM/STY    | 1 | 1 | STM1075 | helD | DNA helica               | STY1097  |
| 556 | CHIP3361 | STM/STY    | 1 | 1 | STM0781 | modA | ABC super                | STY0814  |
| 557 | CHIP3409 | STM/STY    | 1 | 1 | STM0849 | yliB | putative AE              | STY0888  |
| 558 | CHIP2198 | STM/STY    | 1 | 1 | STM3323 | yhbJ | putative P-              | STY3502  |
| 559 | CHIP3364 | STM/STY    | 1 | 1 | STM0786 | ybhC | putative pe              | STY0819  |
| 560 | CHIP3396 | STM/STY    | 1 | 1 | STM0826 | ybiN | putative SA              | STY0863  |
| 561 | CHIP2185 | STM/STY    | 1 | 1 | STM3054 | gcvH | glycine cle              | STY3210  |

|     |          |            |   |   |         |      |                          |
|-----|----------|------------|---|---|---------|------|--------------------------|
| 562 | CHIP0318 | STM/STY    | 1 | 1 | STM0263 | rnhA | RNase HI, STY0284        |
| 563 | CHIP2225 | STM/STY    | 1 | 1 | STM3223 | ygjR | putative de STY3403      |
| 564 | CHIP0358 | STM/STY    | 1 | 1 | STM1397 | sseA | Secretion s STY1723      |
| 565 | CHIP3391 | STM/STY    | 1 | 1 | STM0819 | ybiH | putative tra STY0854     |
| 566 | CHIP3423 | STM/STY    | 1 | 1 | STM0866 | mdfA | multidrug tr STY0899     |
| 567 | CHIP4353 | STM/STY    | 1 | 1 | STM0409 |      | hypotheticæ STY0447      |
| 568 | CHIP4306 | STM/STY    | 1 | 0 | STM2682 |      | putative cytoplasmic pr  |
| 569 | CHIP3688 | STM specil | 1 | 0 | STM4497 |      | putative cytoplasmic pr  |
| 570 | CHIP3706 | STM/STY    | 1 | 1 | STM4528 |      | putative inr STY4886     |
| 571 | CHIP3600 | STM/STY    | 1 | 1 | STM4318 |      | putative ac STY4518      |
| 572 | CHIP3545 | STM specil | 1 | 0 | STM4203 |      | putative phage baseplæ   |
| 573 | CHIP3562 | STM/STY    | 1 | 1 | STM4222 | yjbE | putative ou STY4418      |
| 574 | CHIP3539 | STM specil | 1 | 0 | STM4197 |      | putative inner membra    |
| 575 | CHIP3532 | STM/STY    | 1 | 1 | STM4181 | yjaB | putative ac STY4399      |
| 576 | CHIP0787 | STM/STY    | 1 | 1 | STM2016 | cobT | nicotinate-r STY2219     |
| 577 | CHIP4051 | STM specil | 1 | 0 | STM2744 |      | putative cytoplasmic pr  |
| 578 | CHIP4044 | STM specil | 1 | 0 | STM2735 |      | Fels-2 prophage: hypo    |
| 579 | CHIP4045 | STM/STY    | 1 | 1 | STM2737 |      | Fels-2 proç STY4643      |
| 580 | CHIP2145 | STM/STY    | 1 | 1 | STM3283 | rpsO | 30S riboso STY3464       |
| 581 | CHIP2188 | STM/STY    | 1 | 1 | STM3047 | ygfY | putative cy/ STY3203     |
| 582 | CHIP2209 | STM/STY    | 1 | 1 | STM3259 |      | PTS family STY3442       |
| 583 | CHIP1194 | STM/STY    | 1 | 1 | STM1591 | ydcZ | putative inr STY1474     |
| 584 | CHIP1139 | STM/STY    | 1 | 1 | STM1534 |      | putative hy STY1529      |
| 585 | CHIP1219 | STM/STY    | 1 | 1 | STM1611 | rimL | acetyl trans STY1453     |
| 586 | CHIP1274 | STM/STY    | 1 | 1 | STM3392 | yhdV | putative ou STY3572      |
| 587 | CHIP1381 | STM/STY    | 1 | 1 | STM0078 | fixX | putative fer STY0088     |
| 588 | CHIP3988 | STM/STY    | 1 | 1 | STM1500 | ynfD | putative ou STY1563      |
| 589 | CHIP3120 | STM/STY    | 1 | 1 | STM2561 | glnB | regulatory   STY2808     |
| 590 | CHIP3097 | STM/STY    | 0 | 0 |         |      |                          |
| 591 | CHIP3075 | STM/STY    | 1 | 1 | STM2452 |      | putative inr STY2689     |
| 592 | CHIP3124 | STM/STY    | 1 | 0 | STM2566 |      | putative periplasmic pr  |
| 593 | CHIP3093 | STM/STY    | 1 | 1 | STM2495 | yfgD | putative ar: STY2736     |
| 594 | CHIP3111 | STM/STY    | 1 | 1 | STM2538 | fdx  | [2FE-2S] fe STY2784      |
| 595 | CHIP3332 | STM/STY    | 1 | 1 | STM0724 |      | putative gly STY0765     |
| 596 | CHIP3281 | STM/STY    | 1 | 1 | STM0636 | ybeD | putative cy/ STY0687     |
| 597 | CHIP3000 | STM/STY    | 1 | 1 | STM2303 |      | putative inr STY2533     |
| 598 | CHIP0769 | STM specil | 1 | 0 | PSLT048 | tlpA | alpha-helical coiled coi |
| 599 | CHIP0979 | STM specil | 1 | 0 | PSLT026 |      | putative periplasmic pr  |
| 600 | CHIP1037 | STM specil | 1 | 0 | PSLT042 |      | putative integrase prote |
| 601 | CHIP0424 | STM/STY    | 1 | 0 | PSLT012 | orf7 | putative bacterial regul |
| 602 | CHIP0426 | STM/STY    | 0 | 1 | PSLT007 |      | putative ou STY4846      |
| 603 | CHIP0422 | STM specil | 1 | 0 | PSLT013 | pefl | plasmid-encoded fimbr    |
| 604 | CHIP1115 | STM specil | 0 | 0 | PSLT107 |      | putative cytoplasmic pr  |
| 605 | CHIP1088 | STM specil | 1 | 0 | PSLT074 | finP | antisense RNA determ     |
| 606 | CHIP1012 | none       | 0 | 0 | R460002 |      |                          |
| 607 | CHIP4778 | STM specil | 0 | 0 |         |      |                          |
| 608 | CHIP4782 | STM/STY    | 0 | 0 |         |      |                          |
| 609 | CHIP4786 | STM/STY    | 0 | 0 |         |      |                          |
| 610 | CHIP4790 | STM/STY    | 0 | 0 |         |      |                          |
| 611 | CHIP4794 | STM/STY    | 0 | 0 |         |      |                          |
| 612 | CHIP4798 | STM/STY    | 0 | 0 |         |      |                          |
| 613 | CHIP5004 | STM/STY    | 0 | 1 |         |      | STY1255                  |

|     |          |            |   |   |              |                             |
|-----|----------|------------|---|---|--------------|-----------------------------|
| 614 | CHIP5020 | STY specif | 0 | 1 |              | STY1595                     |
| 615 | CHIP5036 | STY specif | 0 | 1 |              | STY1612                     |
| 616 | CHIP5051 | STY specif | 0 | 1 |              | STY1628                     |
| 617 | CHIP5067 | STM/STY    | 0 | 1 |              | STY1853                     |
| 618 | CHIP4996 | STY specif | 0 | 1 |              | STY1068                     |
| 619 | CHIP5030 | STY specif | 0 | 1 |              | STY1606                     |
| 620 | CHIP5046 | STY specif | 0 | 1 |              | STY1622                     |
| 621 | CHIP5061 | STY specif | 0 | 1 |              | STY1643                     |
| 622 | CHIP4990 | STY specif | 0 | 1 |              | STY1062                     |
| 623 | CHIP5098 | STY specif | 0 | 0 |              | STY2038                     |
| 624 | CHIP5113 | STY specif | 0 | 0 |              | STY2054                     |
| 625 | CHIP5040 | STY specif | 0 | 1 |              | STY1616                     |
| 626 | CHIP5055 | STY specif | 0 | 1 |              | STY1632                     |
| 627 | CHIP5071 | STY specif | 0 | 1 |              | STY1889                     |
| 628 | CHIP5000 | STY specif | 0 | 0 |              | STY1072                     |
| 629 | CHIP5108 | STY specif | 0 | 1 |              | STY2048                     |
| 630 | CHIP5123 | STY specif | 0 | 1 |              | STY2064                     |
| 631 | CHIP5057 | STY specif | 0 | 1 |              | STY1635                     |
| 632 | CHIP5073 | STY specif | 0 | 1 |              | STY1891                     |
| 633 | CHIP5086 | STY specif | 0 | 1 |              | STY2025                     |
| 634 | CHIP5195 | STY specif | 0 | 1 |              | STY3091                     |
| 635 | CHIP5125 | STY specif | 0 | 1 |              | STY2066                     |
| 636 | CHIP5141 | STY specif | 0 | 1 |              | STY2296                     |
| 637 | CHIP5350 | STY specif | 0 | 1 |              | STY4590                     |
| 638 | CHIP5372 | STY specif | 0 | 1 |              | STY4629                     |
| 639 | CHIP5384 | STY specif | 0 | 1 |              | STY4652                     |
| 640 | CHIP5321 | STY specif | 0 | 1 |              | STY4557                     |
| 641 | CHIP5335 | STY specif | 0 | 1 |              | STY4574                     |
| 642 | CHIP5351 | STY specif | 0 | 1 |              | STY4591                     |
| 643 | CHIP5414 | STY specif | 0 | 1 |              | STY4826                     |
| 644 | CHIP5429 | STY specif | 0 | 1 |              | STY4851                     |
| 645 | CHIP5369 | STM/STY    | 0 | 0 |              | STY4625                     |
| 646 | CHIP5303 | STY specif | 0 | 1 |              | STY4528                     |
| 647 | CHIP5318 | STY specif | 0 | 1 |              | STY4552                     |
| 648 | CHIP5415 | STY specif | 0 | 1 |              | STY4827                     |
| 649 | CHIP0777 | STM/STY    | 0 | 1 |              | STY3197                     |
| 650 | CHIP0793 | STM/STY    | 1 | 1 | STM2397 pgtB | Phosphogl STY2634           |
| 651 | CHIP0809 | STM/STY    | 1 | 1 | STM2029 cbfF | synthesis c STY2234         |
| 652 | CHIP0833 | STM/STY    | 1 | 1 | STM3577 tcp  | methyl-acc STY4234          |
| 653 | CHIP2664 | STM/STY    | 1 | 1 | STM0123 murE | UDP-N-ac $\epsilon$ STY0143 |
| 654 | CHIP2680 | STM/STY    | 1 | 1 | STM0158 acnB | aconitate h STY0181         |
| 655 | CHIP2674 | STM/STY    | 1 | 1 | STM0148      | putative cyf STY0170        |
| 656 | CHIP2690 | STM specif | 1 | 0 | STM0174 stiH | putative fimbriae           |
| 657 | CHIP2706 | STM/STY    | 1 | 1 | STM0193 fhuD | ABC super STY0220           |
| 658 | CHIP2722 | STM/STY    | 1 | 1 | STM0234 ldcC | lysine deca STY0259         |
| 659 | CHIP2738 | STM/STY    | 1 | 1 | STM1514 ydeJ | putative Cc STY1547         |
| 660 | CHIP0772 | STM specif | 1 | 0 | STM3640 lpfA | long polar fimbria          |
| 661 | CHIP3316 | STM/STY    | 1 | 1 | STM0697 seqA | negative m STY0735          |
| 662 | CHIP0782 | STM/STY    | 1 | 1 | STM1965 yedE | paral putati STY2173        |
| 663 | CHIP0798 | STM/STY    | 1 | 1 | STM3711 rfaF | ADP-hepto STY4084           |
| 664 | CHIP0814 | STM/STY    | 1 | 1 | STM2024 cbfL | synthesis c STY2228         |
| 665 | CHIP0830 | STM/STY    | 1 | 1 | STM1725 trpC | bifunctiona STY1326         |

|     |          |            |   |   |         |             |                         |         |
|-----|----------|------------|---|---|---------|-------------|-------------------------|---------|
| 666 | CHIP2645 | STM/STY    | 1 | 1 | STM0081 | putative se | STY0093                 |         |
| 667 | CHIP2591 | STM/STY    | 1 | 1 | STM3853 | phoU        | regulatory ;            | STY3930 |
| 668 | CHIP2615 | STM/STY    | 1 | 1 | STM0015 |             | putative ba             | STY0015 |
| 669 | CHIP0856 | STM/STY    | 1 | 1 | STM3110 | mutY        | adenine D†              | STY3265 |
| 670 | CHIP3239 | STM/STY    | 1 | 1 | STM3312 | yrbE        | putative AE             | STY3491 |
| 671 | CHIP3255 | STM/STY    | 1 | 1 | STM3347 | yhcB        | putative pe             | STY3527 |
| 672 | CHIP3279 | STM/STY    | 1 | 1 | STM0632 | ybeC        | putative Se             | STY0682 |
| 673 | CHIP3825 | STM/STY    | 1 | 0 | STM1110 |             | putative cytoplasmic pr |         |
| 674 | CHIP3841 | STM/STY    | 1 | 1 | STM1152 | yceK        | putative ou             | STY1189 |
| 675 | CHIP2417 | STM/STY    | 1 | 1 | STM3497 | yrfH        | heat shock              | STY4299 |
| 676 | CHIP2433 | STM specil | 1 | 0 | STM3522 | rtcR        | sigma N (sigma 54)-de   |         |
| 677 | CHIP2449 | STM/STY    | 1 | 1 | STM3544 | yhhW        | putative cy†            | STY4267 |
| 678 | CHIP3714 | STM/STY    | 1 | 1 | STM4541 | mdbB        | phosphogly              | STY4894 |
| 679 | CHIP3859 | STM/STY    | 1 | 1 | STM1204 | fhuE        | outer mem               | STY1244 |
| 680 | CHIP2435 | STM specil | 1 | 0 | STM3527 |             | putative inner membra   |         |
| 681 | CHIP2451 | STM/STY    | 1 | 0 | STM3552 | yhhA        | putative outer membra   |         |
| 682 | CHIP3716 | STM/STY    | 1 | 1 | STM4545 |             | putative inr            | STY4898 |
| 683 | CHIP3732 | STM/STY    | 1 | 1 | STM4585 | gpmB        | putative ph             | STY4932 |
| 684 | CHIP3764 | STM specil | 1 | 0 | STM0295 |             | putative cytoplasmic pr |         |
| 685 | CHIP2461 | STM/STY    | 1 | 1 | STM3576 | zntA        | P-type ATF              | STY4235 |
| 686 | CHIP3726 | STM specil | 1 | 0 | STM4572 | stjB        | putative fimbrial usher |         |
| 687 | CHIP4038 | STM specil | 1 | 0 | STM2726 |             | Fels-2 prophage: hypo   |         |
| 688 | CHIP4054 | STM specil | 1 | 0 | STM2747 |             | putative cytoplasmic pr |         |
| 689 | CHIP4070 | STM specil | 1 | 0 | STM2763 |             | putative integrase      |         |
| 690 | CHIP4086 | STM/STY    | 1 | 1 | STM2788 |             | tricarboxyli†           | STY2908 |
| 691 | CHIP3568 | STM/STY    | 1 | 1 | STM4244 | yjbO        | putative inr            | STY4440 |
| 692 | CHIP3592 | STM/STY    | 1 | 1 | STM4295 | adiY        | transcriptio            | STY4494 |
| 693 | CHIP3424 | STM/STY    | 1 | 1 | STM0868 |             | putative tra            | STY0901 |
| 694 | CHIP3440 | STM specil | 1 | 0 | STM0896 |             | Fels-1 prophage         |         |
| 695 | CHIP3080 | STM/STY    | 1 | 1 | STM2477 | yffH        | putative py             | STY2714 |
| 696 | CHIP3480 | STM specil | 1 | 0 | STM0948 |             | putative cytoplasmic pr |         |
| 697 | CHIP3074 | STM/STY    | 1 | 1 | STM2450 | amiA        | N-acetylm†              | STY2687 |
| 698 | CHIP3474 | STM/STY    | 1 | 1 | STM0936 | hcr         | NADH oxid               | STY0932 |
| 699 | CHIP3490 | STM/STY    | 1 | 1 | STM0969 | ycaM        | putative AF             | STY0967 |
| 700 | CHIP3506 | STM/STY    | 1 | 1 | STM0994 | mukB        | kinesin-line            | STY0996 |
| 701 | CHIP3531 | STM specil | 0 | 0 | STM1041 |             | Gfsy-2 prophage; prob   |         |
| 702 | CHIP4123 | STM/STY    | 1 | 0 | STM4093 | ftsN        | essential c†            | STY3777 |
| 703 | CHIP4157 | STM specil | 1 | 0 | STM2901 |             | putative cytoplasmic pr |         |
| 704 | CHIP3613 | STM/STY    | 1 | 1 | STM4343 | frdA        | fumarate r†             | STY4703 |
| 705 | CHIP3061 | STM/STY    | 1 | 1 | STM2420 | xapR        | regulator fc            | STY2655 |
| 706 | CHIP3461 | STM specil | 1 | 0 | STM0918 |             | Fels-1 prophage; putat  |         |
| 707 | CHIP3109 | STM/STY    | 1 | 1 | STM2533 | sseA        | putative su             | STY2779 |
| 708 | CHIP3125 | STM/STY    | 1 | 1 | STM2569 | yfhB        | putative ;              | STY2815 |
| 709 | CHIP3119 | STM/STY    | 1 | 1 | STM2560 | yjdL        | putative PC             | STY2807 |
| 710 | CHIP3616 | STM/STY    | 1 | 1 | STM4349 | yjeQ        | putative G†             | STY4709 |
| 711 | CHIP2968 | STM/STY    | 1 | 1 | STM2009 | amn         | AMP nucle               | STY2211 |
| 712 | CHIP3008 | STM/STY    | 1 | 1 | STM2316 | nuoN        | NADH deh†               | STY2546 |
| 713 | CHIP3032 | STM/STY    | 1 | 1 | STM2360 |             | putative di†            | STY2590 |
| 714 | CHIP2284 | STM/STY    | 1 | 1 | STM1198 | pabC        | 4-amino-4-              | STY1237 |
| 715 | CHIP0195 | STM/STY    | 1 | 1 | STM2056 | pduV        | Propanedic              | STY2261 |
| 716 | CHIP0219 | STM/STY    | 0 | 0 | STM3445 | tufA        | protein chain elongatio |         |
| 717 | CHIP2318 | STM/STY    | 1 | 1 | STM1488 | mlc         | transcriptio            | STY1576 |

|     |          |            |   |   |         |        |                      |         |
|-----|----------|------------|---|---|---------|--------|----------------------|---------|
| 718 | CHIP0267 | STM/STY    | 1 | 1 | STM0304 | sinR   | transcriptio         | STY0341 |
| 719 | CHIP2366 | STM/STY    | 1 | 1 | STM1441 |        | putative inr         | STY1681 |
| 720 | CHIP3635 | STM/STY    | 1 | 1 | STM4397 | fkIB   | FKBP-type            | STY4753 |
| 721 | CHIP0277 | STM/STY    | 1 | 1 | STM0115 | leuO   | putative tra         | STY0134 |
| 722 | CHIP2949 | STM/STY    | 1 | 0 | STM1941 |        | putative inr         | STY2152 |
| 723 | CHIP2965 | STM specil | 1 | 0 | STM2006 |        | putative branched    | chai    |
| 724 | CHIP3661 | STM specil | 1 | 0 | STM4435 |        | putative cytoplasmic | pr      |
| 725 | CHIP3005 | STM/STY    | 1 | 1 | STM2313 | elaC   | putative mε          | STY2544 |
| 726 | CHIP3021 | STM/STY    | 1 | 1 | STM2340 |        | putative tra         | STY2570 |
| 727 | CHIP3671 | STM/STY    | 1 | 1 | STM4464 |        | putative arç         | STY4802 |
| 728 | CHIP3687 | STM specil | 1 | 0 | STM4496 |        | putative ATPase      | involv  |
| 729 | CHIP3031 | STM/STY    | 1 | 1 | STM2359 |        | putative an          | STY2589 |
| 730 | CHIP2283 | STM/STY    | 1 | 1 | STM1190 | yceD   | putative mε          | STY1229 |
| 731 | CHIP2307 | STM/STY    | 1 | 1 | STM1343 | nlpC   | lipoprotein          | STY1767 |
| 732 | CHIP2323 | STM/STY    | 1 | 1 | STM1084 | yccK   | putative su          | STY1111 |
| 733 | CHIP1341 | STM/STY    | 1 | 1 | STM0301 | safC   | putative fir         | STY0336 |
| 734 | CHIP1357 | STM/STY    | 1 | 1 | STM0232 | accA   | acetylCoA            | STY0255 |
| 735 | CHIP1469 | STM/STY    | 1 | 1 | STM0443 | cyoA   | cytochromε           | STY0485 |
| 736 | CHIP1397 | STM/STY    | 1 | 1 | STM0153 | aceF   | pyruvate dε          | STY0176 |
| 737 | CHIP3914 | STM/STY    | 1 | 1 | STM1317 | celG   | putative glt         | STY1796 |
| 738 | CHIP3938 | STM specil | 1 | 0 | STM1360 | ydiN   | putative MFS family  | tra     |
| 739 | CHIP0517 | STM/STY    | 1 | 1 | STM2782 | mig-14 | putative tra         | STY2900 |
| 740 | CHIP3964 | STM/STY    | 1 | 1 | STM1460 | ydgK   | putative inr         | STY1662 |
| 741 | CHIP3980 | STM/STY    | 1 | 1 | STM1486 | ynfM   | putative Mf          | STY1579 |
| 742 | CHIP0573 | STM/STY    | 1 | 1 | STM4229 | malE   | ABC super            | STY4425 |
| 743 | CHIP1336 | STM/STY    | 1 | 1 | STM0306 |        | homologue            | STY0351 |
| 744 | CHIP1448 | STM/STY    | 1 | 1 | STM0377 | yaiW   | putative ou          | STY0409 |
| 745 | CHIP1458 | STM/STY    | 1 | 1 | STM0407 | secD   | preprotein           | STY0445 |
| 746 | CHIP1386 | STM/STY    | 1 | 1 | STM0124 | murF   | D-alanine:I          | STY0144 |
| 747 | CHIP1498 | STM/STY    | 1 | 1 | STM2363 | cvpA   | membrane             | STY2593 |
| 748 | CHIP0488 | STM/STY    | 1 | 1 | STM2785 | tctD   | tricarboxyli         | STY2904 |
| 749 | CHIP3943 | STM/STY    | 1 | 1 | STM1370 | sufB   | putative AE          | STY1753 |
| 750 | CHIP0544 | STM/STY    | 1 | 1 | STM3561 | livG   | ABC super            | STY4251 |
| 751 | CHIP1557 | STM/STY    | 1 | 1 | STM0461 | mdlB   | putative AE          | STY0504 |
| 752 | CHIP1573 | STM/STY    | 1 | 1 | STM0568 | pheP   | APC family           | STY0617 |
| 753 | CHIP4742 | STM/STY    | 0 | 1 | STM2210 |        | pseudogen            | STY2446 |
| 754 | CHIP1997 | STM/STY    | 1 | 1 | STM4412 |        | putative pe          | STY4771 |
| 755 | CHIP3169 | STM/STY    | 1 | 1 | STM2645 | yfiK   | paral putati         | STY2838 |
| 756 | CHIP2045 | STM/STY    | 1 | 1 | STM3641 | yhjY   | putative lip:        | STY4161 |
| 757 | CHIP3219 | STM/STY    | 1 | 1 | STM3275 | yhbV   | putative prε         | STY3458 |
| 758 | CHIP1512 | STM/STY    | 1 | 1 | STM2292 | yfaX   | putative tra         | STY2522 |
| 759 | CHIP1528 | STM/STY    | 1 | 1 | STM2540 | hscB   | co-chaperc           | STY2786 |
| 760 | CHIP1045 | STM/STY    | 1 | 1 | STM0027 | bcfG   | fimbrial chε         | STY0032 |
| 761 | CHIP2000 | STM/STY    | 1 | 1 | STM4415 | fbp    | fructose-bi:         | STY4774 |
| 762 | CHIP2016 | STM/STY    | 1 | 1 | STM4543 | dnaC   | chromoson            | STY4896 |
| 763 | CHIP3142 | STM specil | 1 | 0 | STM2598 |        | Gifsy-1 prophage     |         |
| 764 | CHIP2018 | STM/STY    | 1 | 1 | STM4550 | fhuF   | ferric hydrc         | STY4903 |
| 765 | CHIP2034 | STM/STY    | 1 | 1 | STM3709 | kbl    | 2-amino-3-           | STY4086 |
| 766 | CHIP2050 | STM/STY    | 1 | 1 | STM3620 | yhjQ   | putative AT          | STY4180 |
| 767 | CHIP3214 | STM/STY    | 1 | 1 | STM3268 | yraR   | putative nu          | STY3451 |
| 768 | CHIP1515 | STM/STY    | 1 | 1 | STM2282 | glpQ   | glyceropho           | STY2511 |
| 769 | CHIP0722 | STM/STY    | 1 | 1 | STM2277 | nrdA   | ribonucleo:          | STY2506 |

|     |          |            |   |   |         |        |                        |          |
|-----|----------|------------|---|---|---------|--------|------------------------|----------|
| 770 | CHIP0738 | STM/STY    | 1 | 1 | STM2894 | invC   | surface pre            | STY3017  |
| 771 | CHIP1805 | STM/STY    | 1 | 1 | STM4083 | yiiR   | putative inr           | STY3787  |
| 772 | CHIP1837 | STM/STY    | 1 | 1 | STM0699 |        | putative cyf           | STY0737  |
| 773 | CHIP1869 | STM/STY    | 1 | 1 | STM0737 | sucB   | 2-oxogluta             | STY0780  |
| 774 | CHIP0675 | STM/STY    | 1 | 1 | STM4005 | glnG   | response r             | STY3876  |
| 775 | CHIP0669 | STM/STY    | 1 | 1 | STM3469 | pabA   | p-aminobe              | STY4327  |
| 776 | CHIP1824 | STM/STY    | 1 | 1 | STM3999 | polA   | DNA polym              | STY3881  |
| 777 | CHIP1856 | STM/STY    | 1 | 1 | STM0876 | ybjN   | putative cyf           | STY0909  |
| 778 | CHIP1888 | STM/STY    | 1 | 1 | STM3459 | yheS   | putative AT            | STY4339  |
| 779 | CHIP0614 | STM/STY    | 1 | 1 | STM4265 | soxS   | transcriptio           | STY4463  |
| 780 | CHIP0726 | STM/STY    | 1 | 1 | STM2579 | recO   | gap repair             | STY2825  |
| 781 | CHIP0105 | STM/STY    | 1 | 1 | STM1879 | ptrB   | protease II            | STY2085  |
| 782 | CHIP0129 | STM/STY    | 1 | 1 | STM4172 | zraP   | zinc-resist            | STY3713  |
| 783 | CHIP0145 | STM/STY    | 1 | 1 | STM4016 | yshA   | putative ou            | STY3862  |
| 784 | CHIP3951 | STM/STY    | 1 | 1 | STM1425 | ydhE   | putative M             | STY1697  |
| 785 | CHIP0401 | STM/STY    | 1 | 0 | STM2437 | yfeJ   | putative G             | STY2675  |
| 786 | CHIP0417 | STM/STY    | 0 | 0 | STM0946 | tnpA_1 | IS200 trans            | STY1844  |
| 787 | CHIP1286 | STM/STY    | 1 | 1 | STM2661 | yfiH   | putative inr           | STY2850  |
| 788 | CHIP1302 | STM/STY    | 1 | 1 | STM0051 | yaaF   | putative pu            | STY0060  |
| 789 | CHIP4683 | STM/STY    | 0 | 0 | STM1007 |        | Gifsy-2 prophage       |          |
| 790 | CHIP4707 | STM/STY    | 1 | 0 | STM1859 |        | putative cyf           | STY1994  |
| 791 | CHIP4739 | STM/STY    | 1 | 1 | STM3035 |        | putative pe            | STY3184  |
| 792 | CHIP3624 | STM/STY    | 1 | 0 | STM4372 |        | resembles              | STY4728a |
| 793 | CHIP0174 | STM/STY    | 1 | 1 | STM4504 |        | putative cyf           | STY4859  |
| 794 | CHIP0190 | STM/STY    | 1 | 1 | STM2051 | pduP   | Propanedic             | STY2256  |
| 795 | CHIP1233 | STM/STY    | 1 | 1 | STM4280 | nrfD   | putative nit           | STY4478  |
| 796 | CHIP1249 | STM/STY    | 1 | 1 | STM1905 | yecO   | putative S             | STY2113  |
| 797 | CHIP0438 | STM/STY    | 1 | 1 | STM4258 |        | putative m             | STY4453  |
| 798 | CHIP1297 | STM/STY    | 1 | 1 | STM0009 | yaaH   | putative re            | STY0009  |
| 799 | CHIP1291 | STM specil | 1 | 0 | STM2696 |        | Fels-2 prophage: simil |          |
| 800 | CHIP1307 | STM/STY    | 1 | 1 | STM0040 | nhaR   | transcriptio           | STY0048  |
| 801 | CHIP0063 | STM/STY    | 1 | 1 | STM3919 | wzzE   | modulator              | STY3636  |
| 802 | CHIP0025 | STM/STY    | 1 | 1 | STM3962 | yigL   | putative hy            | STY3597  |
| 803 | CHIP0049 | STM/STY    | 1 | 1 | STM3937 | hemD   | uroporphyr             | STY3622  |
| 804 | CHIP2177 | STM/STY    | 1 | 1 | STM3070 | epd    | D-erythro              | STY3228  |
| 805 | CHIP1702 | STM/STY    | 1 | 1 | STM1754 | yehK   | putative ph            | STY1296  |
| 806 | CHIP1718 | STM/STY    | 0 | 0 |         |        |                        | STY1917  |
| 807 | CHIP1734 | STM/STY    | 1 | 1 | STM3017 | kduD   | 2-deoxy-D-             | STY3162  |
| 808 | CHIP1750 | STM/STY    | 1 | 1 | STM2959 |        | putative gly           | STY3097  |
| 809 | CHIP1766 | STM/STY    | 1 | 1 | STM2985 | ygdK   | putative Su            | STY3125  |
| 810 | CHIP1782 | STM/STY    | 1 | 1 | STM4053 |        | putative C4            | STY3819  |
| 811 | CHIP1768 | STM/STY    | 1 | 1 | STM2969 | ygdH   | putative nu            | STY3108  |
| 812 | CHIP1792 | STM/STY    | 1 | 1 | STM4032 |        | putative ac            | STY3846  |
| 813 | CHIP0022 | STM/STY    | 1 | 1 | STM3965 | metE   | 5-methyltet            | STY3594  |
| 814 | CHIP0038 | STM/STY    | 1 | 1 | STM3949 | xerC   | putative int           | STY3610  |
| 815 | CHIP0062 | STM/STY    | 1 | 1 | STM3920 | wecB   | UDP-N-ac               | STY3635  |
| 816 | CHIP0086 | STM/STY    | 1 | 1 | STM4138 | birA   | bifunctiona            | STY3741  |
| 817 | CHIP1739 | STM/STY    | 1 | 1 | STM2996 | recC   | exonucleas             | STY3134  |
| 818 | CHIP0928 | STM/STY    | 1 | 1 | STM1742 | oppF   | ABC super              | STY1309  |
| 819 | CHIP1779 | STM/STY    | 1 | 1 | STM4081 | tpiA   | triosephos             | STY3789  |
| 820 | CHIP4392 | STM/STY    | 1 | 1 | STM0483 | apt    | adenine ph             | STY0527  |
| 821 | CHIP4424 | STM specil | 1 | 0 | STM0538 |        | putative outer membra  |          |



|     |          |            |   |   |         |      |                          |          |
|-----|----------|------------|---|---|---------|------|--------------------------|----------|
| 822 | CHIP4448 | STM/STY    | 1 | 1 | STM0585 | fepA | outer mem                | STY0628  |
| 823 | CHIP1182 | STM/STY    | 1 | 1 | STM0976 | ycaP | putative inr             | STY0976  |
| 824 | CHIP4466 | STM/STY    | 1 | 1 | STM0303 | ybeJ | putative xyl             | STY0338  |
| 825 | CHIP2754 | STM/STY    | 1 | 1 | STM1547 |      | putative m $\alpha$      | STY1514  |
| 826 | CHIP2778 | STM/STY    | 1 | 1 | STM1586 |      | putative pe              | STY1479  |
| 827 | CHIP2802 | STM specil | 1 | 0 | STM1625 | ydcl | putative transcriptional |          |
| 828 | CHIP2826 | STM/STY    | 1 | 1 | STM1661 | ydaA | putative un              | STY1403  |
| 829 | CHIP2820 | STM/STY    | 1 | 0 | STM1650 |      | putative reverse transc  |          |
| 830 | CHIP2844 | STM/STY    | 1 | 0 | STM1698 |      | putative inr             | STY1353  |
| 831 | CHIP4405 | STM/STY    | 1 | 1 | STM0509 |      | putative ou              | STY0556  |
| 832 | CHIP1169 | STM/STY    | 1 | 1 | STM1001 |      | putative let             | STY1005  |
| 833 | CHIP1185 | STM/STY    | 1 | 1 | STM0956 | cydC | ABC super                | STY0954  |
| 834 | CHIP4469 | STM/STY    | 1 | 0 | STM0620 | citX | putative cyf             | STY0669  |
| 835 | CHIP4463 | STM/STY    | 1 | 1 | STM0607 | dsbG | periplasmic              | STY0652  |
| 836 | CHIP2855 | STM/STY    | 1 | 1 | STM1732 | ompW | outer mem                | STY1319  |
| 837 | CHIP2775 | STM/STY    | 1 | 1 | STM1573 |      | putative cyf             | STY1491a |
| 838 | CHIP2799 | STM/STY    | 1 | 1 | STM1621 |      | putative pe              | STY1443  |
| 839 | CHIP2823 | STM/STY    | 1 | 1 | STM1655 | dbpA | ATP-deper                | STY1410  |
| 840 | CHIP2839 | STM/STY    | 1 | 1 | STM1685 | ycjX | putative AT              | STY1376  |
| 841 | CHIP4194 | STM/STY    | 1 | 1 | STM2957 | ygcA | putative Rf              | STY3095  |
| 842 | CHIP4218 | STM/STY    | 1 | 1 | STM3006 | ygdQ | putative int             | STY3149  |
| 843 | CHIP4234 | STM/STY    | 1 | 1 | STM3036 |      | putative inr             | STY3186  |
| 844 | CHIP4258 | STM/STY    | 1 | 1 | STM3099 | yggR | putative pr $\alpha$     | STY3252  |
| 845 | CHIP4370 | STM/STY    | 1 | 1 | STM0447 | tig  | peptidyl-pr $\alpha$     | STY0489  |
| 846 | CHIP2466 | STM/STY    | 1 | 1 | STM3583 | yhhU | putative Ph              | STY4228  |
| 847 | CHIP2508 | STM/STY    | 1 | 1 | STM3679 |      | putative cyf             | STY4117  |
| 848 | CHIP2540 | STM/STY    | 1 | 1 | STM3767 |      | putative cyf             | STY4018  |
| 849 | CHIP4293 | STM/STY    | 1 | 1 | STM3176 | ygiW | putative ou              | STY3353  |
| 850 | CHIP4221 | STM/STY    | 1 | 1 | STM3015 | ygeA | putative as              | STY3159  |
| 851 | CHIP4245 | STM specil | 1 | 0 | STM3079 |      | putative hydrolase or a  |          |
| 852 | CHIP4269 | STM specil | 1 | 0 | STM3123 |      | putative arylsulfatase r |          |
| 853 | CHIP2487 | STM/STY    | 1 | 1 | STM3628 | dppC | ABC super                | STY4170  |
| 854 | CHIP2503 | STM/STY    | 1 | 1 | STM3665 | avtA | valine-pyru              | STY4133  |
| 855 | CHIP2519 | STM/STY    | 1 | 1 | STM3697 |      | putative m $\alpha$      | STY4099  |
| 856 | CHIP2535 | STM/STY    | 1 | 1 | STM3748 | yicH | putative inr             | STY4045  |
| 857 | CHIP4488 | STM/STY    | 1 | 1 | STM0358 | res  | DNA restric              | STY0389  |
| 858 | CHIP1628 | STM/STY    | 1 | 1 | STM2853 | hycA | transcriptio             | STY2975  |
| 859 | CHIP2173 | STM/STY    | 1 | 1 | STM3132 |      | putative xyl             | STY3302  |
| 860 | CHIP1614 | STM/STY    | 1 | 1 | STM2855 | hypB | hydrogena $\alpha$       | STY2977  |
| 861 | CHIP1638 | STM/STY    | 1 | 1 | STM2182 | yohK | putative tra             | STY2412  |
| 862 | CHIP1654 | STM/STY    | 1 | 1 | STM2084 | rfbM | LPS side c               | STY2293  |
| 863 | CHIP1670 | STM/STY    | 1 | 1 | STM2121 | dcd  | dUTPase                  | STY2334  |
| 864 | CHIP1686 | STM/STY    | 0 | 0 | STM2248 | ccmG | heme lyase               | STY2474  |
| 865 | CHIP1648 | STM/STY    | 1 | 1 | STM2218 | yejE | putative AE              | STY2454  |
| 866 | CHIP1672 | STM/STY    | 1 | 1 | STM2145 | yegW | putative re $\alpha$     | STY2374  |
| 867 | CHIP1688 | STM/STY    | 1 | 1 | STM1844 | htpX | heat shock               | STY1975  |
| 868 | CHIP1904 | STM/STY    | 1 | 1 | STM3418 | rpsM | 30S riboso               | STY4380  |
| 869 | CHIP2112 | STM/STY    | 1 | 1 | STM3591 | uspA | universal s              | STY4212  |
| 870 | CHIP2128 | STM/STY    | 1 | 1 | STM3341 | sspB | stringent st             | STY3522  |
| 871 | CHIP2106 | STM/STY    | 1 | 1 | STM3612 | kdgK | ketodeoxy $\alpha$       | STY4191  |
| 872 | CHIP2122 | STM/STY    | 1 | 1 | STM3512 | gntT | GntP famil               | STY4284  |
| 873 | CHIP1954 | STM/STY    | 1 | 1 | STM4404 | cysQ | affects poo              | STY4762  |

|     |          |            |   |   |         |      |                         |         |
|-----|----------|------------|---|---|---------|------|-------------------------|---------|
| 874 | CHIP2162 | STM/STY    | 1 | 1 | STM3182 | yqiA | putative es             | STY3360 |
| 875 | CHIP1611 | STM/STY    | 1 | 1 | STM2837 | srIR | transcriptio            | STY2959 |
| 876 | CHIP4519 | STM/STY    | 1 | 1 | STM2186 |      | putative N/             | STY2416 |
| 877 | CHIP2237 | STM/STY    | 1 | 1 | STM3162 | yghB | putative Dε             | STY3334 |
| 878 | CHIP0370 | STM/STY    | 1 | 1 | STM1408 | ssal | Secretion ε             | STY1712 |
| 879 | CHIP3337 | STM/STY    | 1 | 1 | STM0734 | sdhA | succinate c             | STY0777 |
| 880 | CHIP3377 | STM/STY    | 1 | 1 | STM0801 | ybhK | putative cyI            | STY0835 |
| 881 | CHIP3417 | STM specil | 1 | 0 | STM0858 |      | putative dehydrogenas   |         |
| 882 | CHIP0315 | STM/STY    | 1 | 1 | STM1175 | flgC | flagellar bic           | STY1214 |
| 883 | CHIP3372 | STM/STY    | 1 | 1 | STM0793 | bioA | 7,8-diaminα             | STY0826 |
| 884 | CHIP3404 | STM specil | 1 | 0 | STM0839 |      | putative inner membra   |         |
| 885 | CHIP2193 | STM/STY    | 1 | 1 | STM3332 | yhcG | putative cyI            | STY3512 |
| 886 | CHIP0326 | STM/STY    | 1 | 1 | STM3756 | rmbA | putative cyI            | STY4032 |
| 887 | CHIP2233 | STM/STY    | 1 | 1 | STM3188 | ygiC | putative glt            | STY3366 |
| 888 | CHIP0366 | STM/STY    | 1 | 1 | STM1404 | sseF | Secretion ε             | STY1716 |
| 889 | CHIP3399 | STM/STY    | 1 | 1 | STM0833 | ompX | outer mem               | STY0872 |
| 890 | CHIP3632 | STM/STY    | 1 | 1 | STM4384 | sgaB | putative PT             | STY4740 |
| 891 | CHIP3656 | STM specil | 1 | 0 | STM4430 |      | putative sugar kinase,  |         |
| 892 | CHIP4346 | STM/STY    | 1 | 1 | STM0394 | araJ | MFS family              | STY0428 |
| 893 | CHIP3704 | STM/STY    | 1 | 0 | STM4525 | hsdM | DNA methylase M, hos    |         |
| 894 | CHIP4372 | STM/STY    | 1 | 1 | STM0453 | ybaV | putative D†             | STY0495 |
| 895 | CHIP4428 | STM/STY    | 1 | 1 | STM0551 |      | putative Di†            | STY0599 |
| 896 | CHIP4429 | STM/STY    | 0 | 0 |         |      |                         | STY0602 |
| 897 | CHIP4438 | STM/STY    | 1 | 1 | STM0298 |      | putative int            | STY0329 |
| 898 | CHIP4478 | STM/STY    | 1 | 0 | STM0342 |      | putative pe             | STY0375 |
| 899 | CHIP4480 | STM/STY    | 1 | 1 | STM0344 |      | putative re:            | STY0377 |
| 900 | CHIP1745 | STM/STY    | 1 | 1 | STM2967 | syd  | interacts w/            | STY3106 |
| 901 | CHIP4664 | STM/STY    | 1 | 1 | STM4316 |      | putative cyI            | STY4516 |
| 902 | CHIP4603 | STM/STY    | 1 | 0 | STM4071 |      | putative Mε             | STY3799 |
| 903 | CHIP4644 | STM/STY    | 1 | 1 | STM3783 |      | putative pe             | STY3999 |
| 904 | CHIP2169 | STM/STY    | 1 | 1 | STM3143 | hybG | hydrogena:              | STY3314 |
| 905 | CHIP1140 | STM/STY    | 1 | 1 | STM1535 |      | putative hy             | STY1528 |
| 906 | CHIP1156 | STM/STY    | 1 | 0 | STM1520 | marR | transcriptio            | STY1540 |
| 907 | CHIP2555 | STM/STY    | 1 | 1 | STM3805 | yidH | putative inr            | STY3974 |
| 908 | CHIP2532 | STM/STY    | 1 | 1 | STM3744 | recG | DNA helica              | STY4048 |
| 909 | CHIP2485 | STM/STY    | 1 | 1 | STM3623 | yhjT | putative inr            | STY4177 |
| 910 | CHIP1324 | STM/STY    | 1 | 1 | STM3795 | ilvN | acetolactat             | STY3987 |
| 911 | CHIP2428 | STM specil | 1 | 0 | STM3516 |      | putative cytoplasmic pr |         |
| 912 | CHIP3941 | STM/STY    | 1 | 1 | STM1366 |      | putative pr†            | STY1757 |
| 913 | CHIP0084 | STM/STY    | 1 | 0 | STM4133 | ileU | glutamate tRNA 2 (dup   |         |
| 914 | CHIP4642 | STM specil | 1 | 0 | STM1865 |      | putative cytoplasmic pr |         |
| 915 | CHIP4666 | STM/STY    | 1 | 0 | STM4478 |      | putative cytoplasmic pr |         |
| 916 | CHIP4604 | STM/STY    | 1 | 0 | STM4000 | spf  | spot 42 RNA, inhibition |         |
| 917 | CHIP4661 | STM/STY    | 1 | 0 | STM4140 |      | pseudogene; no in-frar  |         |
| 918 | CHIP4654 | STM/STY    | 1 | 1 | STM3911 |      | putative inr            | STY3643 |
| 919 | CHIP3272 | STM/STY    | 1 | 0 | STM3387 | yhdU | putative periplasmic pr |         |
| 920 | CHIP3237 | STM/STY    | 1 | 1 | STM3308 | yrbA | putative tra            | STY3487 |
| 921 | CHIP2947 | STM/STY    | 1 | 0 | STM1939 |      | putative glt            | STY2147 |
| 922 | CHIP0824 | STM specil | 1 | 0 | PSLT054 | samB | mutagenesis by UV an    |         |
| 923 | CHIP1011 | STM specil | 1 | 0 | PSLT055 | samA | mutagenesis by UV an    |         |
| 924 | CHIP0657 | STM specil | 1 | 0 | PSLT040 | spvA | Salmonella plasmid vir  |         |
| 925 | CHIP1078 | STM specil | 1 | 0 | PSLT064 |      | putative inner membra   |         |

|     |          |            |   |   |         |       |                          |
|-----|----------|------------|---|---|---------|-------|--------------------------|
| 926 | CHIP0952 | STM specif | 1 | 0 | PSLT051 |       | putative cytoplasmic pr  |
| 927 | CHIP1058 | STM specif | 0 | 0 | PSLT024 |       | hypothetical protein     |
| 928 | CHIP1076 | STM specif | 1 | 0 | PSLT062 |       | putative cytoplasmic pr  |
| 929 | CHIP1051 | STM specif | 1 | 0 | PSLT004 | repA3 | DNA replication          |
| 930 | CHIP0943 | none       | 0 | 0 | R460026 | stbA  |                          |
| 931 | CHIP4779 | STM/STY    | 0 | 0 |         |       |                          |
| 932 | CHIP4783 | STM/STY    | 0 | 0 |         |       |                          |
| 933 | CHIP4787 | STM/STY    | 0 | 0 |         |       |                          |
| 934 | CHIP4791 | STM/STY    | 0 | 0 |         |       |                          |
| 935 | CHIP4795 | STM/STY    | 1 | 1 | STM2479 | aegA  | putative ox STY2717      |
| 936 | CHIP4799 | STM specif | 1 | 0 | STM2509 |       | putative IS3-like transp |
| 937 | CHIP4917 | STY specif | 0 | 1 |         |       | STY0205                  |
| 938 | CHIP4933 | STY specif | 0 | 1 |         |       | STY0326                  |
| 939 | CHIP4949 | STM/STY    | 0 | 0 |         |       |                          |
| 940 | CHIP4965 | STY specif | 0 | 1 |         |       | STY1030                  |
| 941 | CHIP4981 | STY specif | 0 | 1 |         |       | STY1052                  |
| 942 | CHIP5088 | STY specif | 0 | 1 |         |       | STY2027                  |
| 943 | CHIP4943 | STM/STY    | 0 | 1 |         |       | STY0405                  |
| 944 | CHIP4959 | STY specif | 0 | 1 |         |       | STY1019                  |
| 945 | CHIP4975 | STY specif | 0 | 1 |         |       | STY1046                  |
| 946 | CHIP5083 | STY specif | 0 | 1 |         |       | STY2021                  |
| 947 | CHIP5191 | STY specif | 0 | 1 |         |       | STY3087                  |
| 948 | CHIP5205 | STY specif | 0 | 1 |         |       | STY3285                  |
| 949 | CHIP4953 | STY specif | 0 | 1 |         |       | STY0947                  |
| 950 | CHIP4969 | STY specif | 0 | 1 |         |       | STY1040                  |
| 951 | CHIP4984 | STY specif | 0 | 1 |         |       | STY1056                  |
| 952 | CHIP5092 | STY specif | 0 | 1 |         |       | STY2031                  |
| 953 | CHIP5201 | STY specif | 0 | 1 |         |       | STY3193                  |
| 954 | CHIP5213 | STY specif | 0 | 1 |         |       | STY3347                  |
| 955 | CHIP4971 | STM/STY    | 0 | 0 |         |       |                          |
| 956 | CHIP4986 | STY specif | 0 | 1 |         |       | STY1058                  |
| 957 | CHIP5002 | STY specif | 0 | 1 |         |       | STY1076                  |
| 958 | CHIP5109 | STY specif | 0 | 1 |         |       | STY2050                  |
| 959 | CHIP5215 | STM/STY    | 0 | 0 | STM0055 |       | putative ox STY3532      |
| 960 | CHIP5231 | STY specif | 0 | 1 |         |       | STY3667                  |
| 961 | CHIP5432 | STM/STY    | 0 | 1 |         |       | STY4854                  |
| 962 | CHIP5290 | STM/STY    | 0 | 0 |         |       |                          |
| 963 | CHIP5306 | STY specif | 0 | 1 |         |       | STY4534                  |
| 964 | CHIP5402 | STY specif | 0 | 1 |         |       | STY4677                  |
| 965 | CHIP5418 | STY specif | 0 | 1 |         |       | STY4830                  |
| 966 | CHIP5433 | STM/STY    | 0 | 0 |         |       |                          |
| 967 | CHIP5339 | STY specif | 0 | 1 |         |       | STY4578                  |
| 968 | CHIP5355 | STY specif | 0 | 1 |         |       | STY4595                  |
| 969 | CHIP5376 | STY specif | 0 | 1 |         |       | STY4636                  |
| 970 | CHIP5388 | STY specif | 0 | 0 |         |       | STY2419                  |
| 971 | CHIP5399 | STY specif | 0 | 1 |         |       | STY4674                  |
| 972 | CHIP5340 | STY specif | 0 | 1 |         |       | STY4579                  |
| 973 | CHIP2568 | STM/STY    | 1 | 1 | STM3821 | torD  | cytoplasmic STY3957      |
| 974 | CHIP2584 | STM/STY    | 1 | 1 | STM3843 | trmE  | GTPase fo STY3937        |
| 975 | CHIP2600 | STM/STY    | 1 | 1 | STM3871 | atpB  | membrane STY3907         |
| 976 | CHIP0841 | STM/STY    | 1 | 1 | STM3715 | rfaZ  | lipopolysac STY4080      |
| 977 | CHIP3240 | STM/STY    | 1 | 1 | STM3313 | yrbF  | putative AE STY3492      |

|      |          |            |   |   |         |      |                                  |
|------|----------|------------|---|---|---------|------|----------------------------------|
| 978  | CHIP3256 | STM/STY    | 1 | 0 | STM3350 |      | putative inner membra            |
| 979  | CHIP3250 | STM/STY    | 1 | 1 | STM3342 | sspA | stringent st STY3523             |
| 980  | CHIP3266 | STM/STY    | 1 | 1 | STM3374 | mreB | rod shape- STY3554               |
| 981  | CHIP3282 | STM/STY    | 1 | 1 | STM0637 | dacA | D-alanyl-D- STY0688              |
| 982  | CHIP3298 | STM specil | 1 | 0 | STM0659 | hscC | putative heatshock pro           |
| 983  | CHIP3314 | STM/STY    | 1 | 1 | STM0693 | fur  | transcriptio STY0731             |
| 984  | CHIP2571 | STM/STY    | 1 | 1 | STM3824 | torR | response r <sub>1</sub> STY3954  |
| 985  | CHIP2748 | STM/STY    | 1 | 1 | STM1537 |      | putative Ni <sub>2</sub> STY1526 |
| 986  | CHIP2573 | STM specil | 0 | 0 | STM3828 | dgoA | galactonate dehydratas           |
| 987  | CHIP2589 | STM/STY    | 1 | 1 | STM3848 | yidZ | putative tra STY3935             |
| 988  | CHIP2605 | STM/STY    | 1 | 1 | STM3880 | kup  | KUP family STY3898               |
| 989  | CHIP0838 | STM/STY    | 1 | 1 | STM1332 | rfc  | O-antigen $\mu$ STY1779          |
| 990  | CHIP0862 | STM/STY    | 1 | 1 | STM0776 | galE | UDP-galac STY0809                |
| 991  | CHIP0808 | STM/STY    | 1 | 1 | STM2030 | cbiT | synthesis c STY2235              |
| 992  | CHIP0840 | STM/STY    | 1 | 1 | STM3714 | rfaK | putative he STY4081              |
| 993  | CHIP2647 | STM/STY    | 1 | 0 | STM0084 |      | putative su STY0098              |
| 994  | CHIP2671 | STM/STY    | 1 | 1 | STM0138 | yacG | putative cy <sub>1</sub> STY0160 |
| 995  | CHIP2687 | STM/STY    | 1 | 1 | STM0171 | yadF | putative ca STY0193              |
| 996  | CHIP2711 | STM/STY    | 1 | 1 | STM0211 | yaeH | putative cy <sub>1</sub> STY0233 |
| 997  | CHIP2385 | STM/STY    | 1 | 1 | STM3405 | smf  | putative pr <sub>1</sub> STY4392 |
| 998  | CHIP2401 | STM/STY    | 1 | 1 | STM3461 |      | putative cy <sub>1</sub> STY4337 |
| 999  | CHIP3865 | STM/STY    | 1 | 1 | STM1211 | ndh  | respiratory STY1251              |
| 1000 | CHIP3881 | STM/STY    | 1 | 1 | STM1253 |      | putative inr STY1868             |
| 1001 | CHIP3897 | STM/STY    | 1 | 1 | STM1286 | mipA | scaffolding STY1830              |
| 1002 | CHIP4010 | STM/STY    | 1 | 1 | STM2116 | wzc  | putative tyr STY2329             |
| 1003 | CHIP3867 | STM/STY    | 1 | 1 | STM1214 | ycfR | putative ou STY1254              |
| 1004 | CHIP3883 | STM/STY    | 1 | 1 | STM1261 |      | putative cy <sub>1</sub> STY1859 |
| 1005 | CHIP3899 | STM/STY    | 1 | 1 | STM1288 |      | putative alc STY1828             |
| 1006 | CHIP4012 | STM/STY    | 1 | 1 | STM2119 | yegH | putative inr STY2332             |
| 1007 | CHIP3740 | STM/STY    | 1 | 1 | STM4600 | lasT | putative tR <sub>1</sub> STY4949 |
| 1008 | CHIP4060 | STM specil | 1 | 0 | STM2753 |      | putative dehydrogenas            |
| 1009 | CHIP4006 | STM/STY    | 1 | 1 | STM2109 | gmd  | GDP-D-ma STY2321                 |
| 1010 | CHIP4022 | STM/STY    | 1 | 1 | STM2136 | yegQ | putative pr <sub>1</sub> STY2365 |
| 1011 | CHIP3750 | STM specil | 1 | 0 | STM0275 |      | putative cytoplasmic pr          |
| 1012 | CHIP3766 | STM/STY    | 1 | 0 | STM0297 |      | putative tra STY0343             |
| 1013 | CHIP3782 | STM specil | 1 | 0 | STM0329 |      | putative 3-isopropylma           |
| 1014 | CHIP3798 | STM/STY    | 1 | 1 | STM1061 | ycbY | putative N $\epsilon$ STY1082    |
| 1015 | CHIP4144 | STM/STY    | 1 | 1 | STM4126 | udhA | soluble pyr STY3748              |
| 1016 | CHIP4168 | STM/STY    | 1 | 1 | STM2915 | ygbM | putative en STY3040              |
| 1017 | CHIP3048 | STM/STY    | 1 | 1 | STM2386 | yfcN | putative Sn STY2618              |
| 1018 | CHIP3064 | STM/STY    | 1 | 1 | STM2424 | yfeR | putative tra STY2660             |
| 1019 | CHIP3464 | STM specil | 1 | 0 | STM0921 |      | Fels-1 prophage; putat           |
| 1020 | CHIP3104 | STM/STY    | 1 | 1 | STM2526 | ndk  | nucleoside STY2771               |
| 1021 | CHIP3458 | STM specil | 1 | 0 | STM0915 |      | Fels-1 prophage                  |
| 1022 | CHIP3098 | STM/STY    | 1 | 1 | STM2510 | guaA | GMP synth STY2751                |
| 1023 | CHIP3114 | STM/STY    | 1 | 1 | STM2544 | yfhP | believed to STY2790              |
| 1024 | CHIP3130 | STM specil | 0 | 0 | STM2586 |      | Gifsy-1 prophage: simi           |
| 1025 | CHIP4107 | STM/STY    | 1 | 1 | STM4059 | cpXR | response r <sub>1</sub> STY3812  |
| 1026 | CHIP3555 | STM specil | 1 | 0 | STM4213 |      | putative phage tail she          |
| 1027 | CHIP4165 | STM/STY    | 1 | 1 | STM2911 |      | putative pe STY3036              |
| 1028 | CHIP4189 | STM specil | 1 | 0 | STM2944 | ygcB | putative helicase                |
| 1029 | CHIP3069 | STM/STY    | 1 | 1 | STM2441 | cysA | ABC super STY2678                |

|      |          |            |   |   |         |              |                         |         |
|------|----------|------------|---|---|---------|--------------|-------------------------|---------|
| 1030 | CHIP3085 | STM/STY    | 1 | 1 | STM2486 | putative inr | STY2724                 |         |
| 1031 | CHIP3493 | STM/STY    | 1 | 1 | STM0972 | homologou    | STY0971                 |         |
| 1032 | CHIP3509 | STM/STY    | 1 | 1 | STM1003 | putative tra | STY1009                 |         |
| 1033 | CHIP3503 | STM/STY    | 1 | 1 | STM0991 | smtA         | S-adenosyl              | STY0993 |
| 1034 | CHIP2952 | STM/STY    | 1 | 1 | STM1953 | yedO         | putative 1- $\alpha$    | STY2161 |
| 1035 | CHIP2976 | STM/STY    | 1 | 1 | STM2075 | hisH         | glutamine $\epsilon$    | STY2284 |
| 1036 | CHIP3016 | STM/STY    | 1 | 1 | STM2333 | yfbS         | putative re             | STY2563 |
| 1037 | CHIP0193 | STM/STY    | 1 | 1 | STM2054 | pduT         | Propanedic              | STY2259 |
| 1038 | CHIP2292 | STM/STY    | 1 | 1 | STM1270 | yeaS         | paral putati            | STY1851 |
| 1039 | CHIP2278 | STM/STY    | 1 | 1 | STM1132 |              | putative su             | STY1169 |
| 1040 | CHIP2302 | STM/STY    | 1 | 1 | STM1327 | ydiY         | putative sa             | STY1784 |
| 1041 | CHIP0251 | STM/STY    | 1 | 1 | STM0371 | prpE         | putative ac             | STY0403 |
| 1042 | CHIP2350 | STM/STY    | 1 | 1 | STM1318 | katE         | catalase; h             | STY1793 |
| 1043 | CHIP3619 | STM/STY    | 1 | 1 | STM4355 | yjeS         | putative Fe             | STY4712 |
| 1044 | CHIP2963 | STM/STY    | 0 | 0 |         |              |                         |         |
| 1045 | CHIP2360 | STM/STY    | 1 | 1 | STM1390 | orf242       | putative re             | STY1730 |
| 1046 | CHIP3629 | STM/STY    | 1 | 1 | STM4378 | yjfN         | putative inr            | STY4734 |
| 1047 | CHIP3645 | STM specil | 1 | 0 | STM4418 |              | sugar (and other) trans |         |
| 1048 | CHIP2989 | STM/STY    | 1 | 1 | STM2276 | ubiG         | 3-demethyl              | STY2505 |
| 1049 | CHIP3685 | STM specil | 1 | 0 | STM4494 |              | putative ABC-type sug   |         |
| 1050 | CHIP3701 | STM/STY    | 1 | 1 | STM4519 |              | putative N/             | STY4876 |
| 1051 | CHIP2999 | STM/STY    | 1 | 1 | STM2298 | pmrF         | putative gly            | STY2528 |
| 1052 | CHIP3015 | STM/STY    | 1 | 1 | STM2332 |              | putative hy             | STY2562 |
| 1053 | CHIP3711 | STM specil | 1 | 0 | STM4537 |              | putative PTS permeasi   |         |
| 1054 | CHIP2291 | STM/STY    | 1 | 1 | STM1269 |              | putative ch             | STY1852 |
| 1055 | CHIP0232 | STM specil | 1 | 0 | STM0200 | stfG         | putative minor fimbrial |         |
| 1056 | CHIP0248 | STM/STY    | 1 | 1 | STM0368 | prpB         | putative ca             | STY0400 |
| 1057 | CHIP1437 | STM/STY    | 1 | 1 | STM2649 | trxC         | thioredoxin             | STY2842 |
| 1058 | CHIP1453 | STM/STY    | 1 | 1 | STM0390 | aroM         | protein of $\alpha$     | STY0423 |
| 1059 | CHIP1477 | STM/STY    | 1 | 1 | STM4236 | dgkA         | diacylglyce             | STY4432 |
| 1060 | CHIP1501 | STM/STY    | 1 | 1 | STM2347 | yfcE         | putative ph             | STY2577 |
| 1061 | CHIP0491 | STM/STY    | 1 | 1 | STM2297 | yfbE         | putative D $\epsilon$   | STY2527 |
| 1062 | CHIP0515 | STM/STY    | 1 | 1 | STM4226 | yjbA         | putative inr            | STY4422 |
| 1063 | CHIP3948 | STM/STY    | 1 | 1 | STM1375 | ynhG         | putative Ly             | STY1748 |
| 1064 | CHIP0541 | STM/STY    | 1 | 1 | STM1582 | nhoA         | putative an $\gamma$    | STY1483 |
| 1065 | CHIP0557 | STM/STY    | 1 | 1 | STM2265 | ada          | bifunctiona             | STY2491 |
| 1066 | CHIP1320 | STM/STY    | 1 | 1 | STM3785 |              | putative re             | STY3997 |
| 1067 | CHIP1432 | STM/STY    | 1 | 1 | STM2577 | acpS         | holo-[acyl- $\alpha$    | STY2823 |
| 1068 | CHIP1360 | STM/STY    | 1 | 1 | STM0165 | speD         | S-adenosyl              | STY0187 |
| 1069 | CHIP1370 | STM/STY    | 1 | 1 | STM2061 | sbmC         | DNA gyras               | STY2266 |
| 1070 | CHIP1394 | STM/STY    | 1 | 1 | STM0146 | ampD         | N-acetyl-ar             | STY0168 |
| 1071 | CHIP1410 | STM/STY    | 1 | 1 | STM0156 |              | putative pe             | STY0179 |
| 1072 | CHIP3919 | STM/STY    | 1 | 1 | STM1333 | thrS         | threonine tI            | STY1778 |
| 1073 | CHIP0528 | STM/STY    | 1 | 1 | STM0425 | thil         | sulfur trans            | STY0464 |
| 1074 | CHIP3975 | STM/STY    | 1 | 1 | STM1477 | ydgl         | putative an             | STY1645 |
| 1075 | CHIP1018 | STM/STY    | 1 | 1 | STM0495 | ybaK         | putative cyI            | STY0541 |
| 1076 | CHIP1581 | STM/STY    | 1 | 1 | STM0496 | ybaP         | putative cyI            | STY0542 |
| 1077 | CHIP1597 | STM/STY    | 1 | 1 | STM0594 | fepB         | ABC super               | STY0638 |
| 1078 | CHIP2005 | STM/STY    | 1 | 1 | STM4475 | valS         | valine tRN/             | STY4814 |
| 1079 | CHIP2029 | STM/STY    | 1 | 1 | STM4598 | arcA         | response rI             | STY4947 |
| 1080 | CHIP3193 | STM/STY    | 1 | 1 | STM3216 |              | putative m $\epsilon$   | STY3394 |
| 1081 | CHIP2079 | STM/STY    | 1 | 1 | STM3743 | spoU         | putative tR             | STY4049 |

|      |          |            |   |   |         |              |                          |         |
|------|----------|------------|---|---|---------|--------------|--------------------------|---------|
| 1082 | CHIP0973 | STM/STY    | 1 | 1 | STM1260 | putative inr | STY1860                  |         |
| 1083 | CHIP1544 | STM/STY    | 1 | 1 | STM2421 | xapB         | MFS super                | STY2657 |
| 1084 | CHIP1600 | STM/STY    | 1 | 1 | STM2773 | iroB         | putative gly             | STY2890 |
| 1085 | CHIP3148 | STM specil | 1 | 0 | STM2604 |              | Gifsy-1 prophage: simi   |         |
| 1086 | CHIP3164 | STM/STY    | 0 | 1 | STM1019 |              | Gifsy-2 pro              | STY1032 |
| 1087 | CHIP3150 | STM specil | 1 | 0 | STM2606 |              | Gifsy-1 prophage: simi   |         |
| 1088 | CHIP3166 | STM/STY    | 1 | 1 | STM2642 | yfiC         | putative tra             | STY2835 |
| 1089 | CHIP3182 | STM/STY    | 1 | 1 | STM3192 |              | putative an              | STY3370 |
| 1090 | CHIP2058 | STM/STY    | 1 | 1 | STM3587 | yhil         | paral putati             | STY4223 |
| 1091 | CHIP2074 | STM/STY    | 1 | 1 | STM3490 | yrfB         | putative inr             | STY4306 |
| 1092 | CHIP0976 | STM/STY    | 1 | 1 | STM2453 |              | putative cyf             | STY2690 |
| 1093 | CHIP0634 | STM/STY    | 1 | 1 | STM2887 | spaS         | surface pre              | STY3010 |
| 1094 | CHIP0746 | STM/STY    | 1 | 0 | STM2465 | eutM         | putative detox protein i |         |
| 1095 | CHIP1813 | STM/STY    | 1 | 1 | STM4056 | yiiM         | putative cyf             | STY3815 |
| 1096 | CHIP1845 | STM/STY    | 1 | 1 | STM0661 | ybeK         | putative pu              | STY0706 |
| 1097 | CHIP1877 | STM/STY    | 1 | 1 | STM0708 | ybfA         | putative pe              | STY0748 |
| 1098 | CHIP0683 | STM/STY    | 1 | 1 | STM2900 | invH         | invasion pr              | STY3023 |
| 1099 | CHIP0765 | STM/STY    | 1 | 1 | STM0552 | fimW         | putative fir             | STY0600 |
| 1100 | CHIP1832 | STM/STY    | 1 | 1 | STM0784 | ybhA         | putative hy              | STY0817 |
| 1101 | CHIP1864 | STM/STY    | 1 | 1 | STM0771 |              | putative AE              | STY0803 |
| 1102 | CHIP0678 | STM/STY    | 1 | 1 | STM1070 | ompA         | putative hy              | STY1091 |
| 1103 | CHIP0710 | STM/STY    | 1 | 1 | STM1177 | flgE         | flagellar bic            | STY1216 |
| 1104 | CHIP0734 | STM/STY    | 1 | 1 | STM1776 | prfA         | peptide ch               | STY1901 |
| 1105 | CHIP0113 | STM/STY    | 1 | 1 | STM1928 | otsA         | trehalose- $\epsilon$    | STY2137 |
| 1106 | CHIP4712 | STM/STY    | 1 | 1 | STM1999 |              | putative cyf             | STY2207 |
| 1107 | CHIP0153 | STM/STY    | 1 | 1 | STM3869 | atpF         | membrane                 | STY3909 |
| 1108 | CHIP0385 | STM/STY    | 1 | 1 | STM1435 | gloA         | glyoxalase               | STY1687 |
| 1109 | CHIP1236 | STM/STY    | 1 | 1 | STM1952 | yecS         | putative AE              | STY2160 |
| 1110 | CHIP1252 | STM/STY    | 1 | 1 | STM1675 |              | putative sh              | STY1389 |
| 1111 | CHIP0459 | STM/STY    | 1 | 1 | STM2638 | rseB         | anti sigma               | STY2831 |
| 1112 | CHIP0475 | STM/STY    | 1 | 1 | STM0730 | gltA         | citrate synt             | STY0773 |
| 1113 | CHIP0108 | STM/STY    | 1 | 1 | STM1230 | phoQ         | sensory kir              | STY1270 |
| 1114 | CHIP0132 | STM/STY    | 1 | 1 | STM4175 | purD         | phosphorib               | STY3710 |
| 1115 | CHIP0164 | STM/STY    | 1 | 1 | STM3286 | infB         | protein cha              | STY3467 |
| 1116 | CHIP0180 | STM/STY    | 1 | 1 | STM2041 | pduD         | Propanedic               | STY2246 |
| 1117 | CHIP3669 | STM/STY    | 1 | 1 | STM4453 | treC         | trehalose- $\mu$         | STY4793 |
| 1118 | CHIP0390 | STM/STY    | 1 | 1 | STM1394 | ssaC         | Secretion $\epsilon$     | STY1726 |
| 1119 | CHIP0406 | STM/STY    | 1 | 1 | STM1194 | fabD         | malonyl-Cc               | STY1233 |
| 1120 | CHIP1257 | STM/STY    | 1 | 1 | STM1705 | osmB         | osmotically              | STY1346 |
| 1121 | CHIP1273 | STM/STY    | 1 | 1 | STM3355 |              | putative tar             | STY3535 |
| 1122 | CHIP0470 | STM/STY    | 1 | 1 | STM3721 | rfaP         | lipopolysac              | STY4073 |
| 1123 | CHIP0464 | STM specil | 0 | 0 | STM1009 |              | Gifsy-2 prophage; exo    |         |
| 1124 | CHIP0480 | STM/STY    | 1 | 1 | STM1143 | csgB         | minor curlir             | STY1180 |
| 1125 | CHIP0009 | STM/STY    | 1 | 1 | STM3979 | ubiB         | FMN reduc                | STY3580 |
| 1126 | CHIP0702 | STM/STY    | 1 | 1 | STM2673 | rpIS         | 50S riboso               | STY2860 |
| 1127 | CHIP0057 | STM/STY    | 1 | 1 | STM3925 | wecE         | TDP-4-oxo                | STY3630 |
| 1128 | CHIP0073 | STM/STY    | 1 | 1 | STM3906 |              | putative cyf             | STY3651 |
| 1129 | CHIP0875 | STM/STY    | 1 | 1 | STM1181 | flgl         | putative fla             | STY1220 |
| 1130 | CHIP0891 | STM/STY    | 1 | 1 | STM3477 | cysG         | siroheme s               | STY4319 |
| 1131 | CHIP0907 | STM/STY    | 1 | 1 | STM3002 | lgt          | phosphatid               | STY3143 |
| 1132 | CHIP0923 | STM/STY    | 1 | 1 | STM3210 | dnaG         | DNA biosyl               | STY3389 |
| 1133 | CHIP0939 | STM/STY    | 1 | 1 | STM0427 | phnU         | 2-aminoethr              | STY0466 |

|      |          |            |   |   |         |      |                          |         |
|------|----------|------------|---|---|---------|------|--------------------------|---------|
| 1134 | CHIP1790 | STM/STY    | 1 | 1 | STM4036 | fdoH | formate de               | STY3841 |
| 1135 | CHIP0941 | STM/STY    | 1 | 1 | STM0828 | glnQ | ABC super                | STY0866 |
| 1136 | CHIP0006 | STM/STY    | 1 | 1 | STM3982 | fadA | 3-ketoacyl-              | STY3578 |
| 1137 | CHIP0548 | STM/STY    | 1 | 1 | STM1914 | flhB | putative pa              | STY2123 |
| 1138 | CHIP1164 | STM/STY    | 1 | 1 | STM0996 | ycbK | putative ou              | STY0998 |
| 1139 | CHIP2093 | STM/STY    | 1 | 1 | STM3677 | sgbE | L-ribulose-5-            | STY4119 |
| 1140 | CHIP2695 | STM/STY    | 1 | 1 | STM0179 | yadE | putative xyl             | STY0197 |
| 1141 | CHIP0912 | STM/STY    | 1 | 1 | STM0608 | ahpC | alkyl hydroly            | STY0653 |
| 1142 | CHIP1763 | STM/STY    | 1 | 1 | STM3011 | galR | transcriptio             | STY3155 |
| 1143 | CHIP1787 | STM/STY    | 1 | 1 | STM4039 |      | putative inr             | STY3837 |
| 1144 | CHIP1132 | STM/STY    | 1 | 1 | STM1893 | zunB | ABC super                | STY2101 |
| 1145 | CHIP1172 | STM/STY    | 1 | 1 | STM1559 |      | putative gly             | STY1504 |
| 1146 | CHIP1188 | STM/STY    | 1 | 1 | STM1578 | narY | nitrate redt             | STY1487 |
| 1147 | CHIP1190 | STM/STY    | 1 | 1 | STM1580 | narV | nitrate redt             | STY1485 |
| 1148 | CHIP4474 | STM/STY    | 1 | 1 | STM0337 | stbD | putative fir             | STY0370 |
| 1149 | CHIP2858 | STM/STY    | 1 | 1 | STM1739 | cls  | cardiolipin              | STY1312 |
| 1150 | CHIP2882 | STM/STY    | 1 | 1 | STM1800 | ycgQ | putative ho              | STY1928 |
| 1151 | CHIP2906 | STM/STY    | 1 | 1 | STM1847 | yebR | putative G/              | STY1978 |
| 1152 | CHIP2930 | STM/STY    | 1 | 1 | STM1891 | znuA | ABC super                | STY2099 |
| 1153 | CHIP2828 | STM/STY    | 1 | 1 | STM1663 | ynal | putative int             | STY1401 |
| 1154 | CHIP4389 | STM/STY    | 1 | 0 | STM0479 |      | putative tra             | STY0523 |
| 1155 | CHIP1145 | STM/STY    | 1 | 1 | STM0613 |      | putative hy              | STY0661 |
| 1156 | CHIP4437 | STM specil | 1 | 0 | STM0571 |      | putative inner membra    |         |
| 1157 | CHIP4453 | STM/STY    | 1 | 1 | STM0591 | fepG | ABC super                | STY0635 |
| 1158 | CHIP4477 | STM/STY    | 1 | 1 | STM0341 |      | putative inr             | STY0374 |
| 1159 | CHIP4471 | STM/STY    | 1 | 1 | STM0624 | citC | citrate lyas             | STY0673 |
| 1160 | CHIP2759 | STM specil | 1 | 0 | STM1552 |      | putative cytoplasmic pr  |         |
| 1161 | CHIP2879 | STM/STY    | 1 | 1 | STM1793 |      | putative cyf             | STY1921 |
| 1162 | CHIP2807 | STM specil | 1 | 0 | STM1630 |      | putative inner membra    |         |
| 1163 | CHIP2927 | STM/STY    | 1 | 1 | STM1886 | zwf  | glucose-6-ph             | STY2094 |
| 1164 | CHIP2943 | STM specil | 1 | 0 | STM1933 |      | putative ribose 5-phos   |         |
| 1165 | CHIP4290 | STM specil | 1 | 0 | STM3169 |      | putative dicarboxylate-l |         |
| 1166 | CHIP4314 | STM/STY    | 1 | 1 | STM2692 |      | putative Hl              | STY2878 |
| 1167 | CHIP4242 | STM/STY    | 1 | 1 | STM3069 | pgk  | phosphogly               | STY3227 |
| 1168 | CHIP4354 | STM/STY    | 1 | 1 | STM0410 |      | putative re              | STY0448 |
| 1169 | CHIP4282 | STM/STY    | 1 | 1 | STM3152 |      | putative m               | STY3325 |
| 1170 | CHIP4586 | STM/STY    | 1 | 1 | STM2832 | srIA | PTS family               | STY2953 |
| 1171 | CHIP4628 | STM/STY    | 1 | 0 | STM0266 |      | putative cyf             | STY0286 |
| 1172 | CHIP4668 | STM/STY    | 1 | 1 | STM4529 |      | putative cyf             | STY4887 |
| 1173 | CHIP4205 | STM/STY    | 1 | 1 | STM2978 | fucU | conserved                | STY3118 |
| 1174 | CHIP4317 | STM specil | 1 | 0 | STM2697 |      | Fels-2 prophage: simila  |         |
| 1175 | CHIP4341 | STM/STY    | 1 | 1 | STM0386 | proC | pyrroline-5-             | STY0419 |
| 1176 | CHIP4365 | STM/STY    | 1 | 1 | STM0439 | cyoE | protohaem                | STY0481 |
| 1177 | CHIP4607 | STM/STY    | 1 | 1 | STM3004 | ygdP | putative inv             | STY3145 |
| 1178 | CHIP4623 | STM/STY    | 1 | 1 | STM4445 |      | putative di              | STY4784 |
| 1179 | CHIP4639 | STM/STY    | 1 | 1 | STM1504 | ynfA | putative inr             | STY1558 |
| 1180 | CHIP4655 | STM/STY    | 1 | 1 | STM3908 | ilvY | positive re              | STY3649 |
| 1181 | CHIP1612 | STM/STY    | 1 | 1 | STM2838 | gutQ | putative po              | STY2960 |
| 1182 | CHIP4512 | STM/STY    | 1 | 0 | STM3540 | yhgN | putative inner membra    |         |
| 1183 | CHIP4482 | STM/STY    | 1 | 0 | STM0350 |      | homology t               | STY0384 |
| 1184 | CHIP1622 | STM/STY    | 1 | 1 | STM2828 | oraA | regulator                | STY2949 |
| 1185 | CHIP4522 | STM/STY    | 1 | 1 | STM2191 | galS | transcriptio             | STY2425 |

|      |          |            |   |   |         |      |                          |         |
|------|----------|------------|---|---|---------|------|--------------------------|---------|
| 1186 | CHIP4538 | STM/STY    | 1 | 1 | STM2226 | yejK | nucleotide               | STY2463 |
| 1187 | CHIP4554 | STM/STY    | 1 | 1 | STM2140 | yegS | putative di              | STY2369 |
| 1188 | CHIP4570 | STM/STY    | 1 | 1 | STM2172 | yohG | putative O               | STY2402 |
| 1189 | CHIP4532 | STM/STY    | 1 | 1 | STM2204 | fruA | Sugar Spe                | STY2439 |
| 1190 | CHIP4556 | STM/STY    | 1 | 1 | STM2142 | yegT | putative M               | STY2371 |
| 1191 | CHIP4572 | STM/STY    | 1 | 1 | STM2175 |      | putative m               | STY2405 |
| 1192 | CHIP2096 | STM/STY    | 1 | 1 | STM3671 | yiaM | putative tra             | STY4127 |
| 1193 | CHIP1928 | STM/STY    | 1 | 1 | STM0930 | orfB | putative cy              | STY0926 |
| 1194 | CHIP1944 | STM/STY    | 1 | 1 | STM4369 | yjfH | putative tR              | STY4726 |
| 1195 | CHIP1922 | STM/STY    | 1 | 1 | STM3451 | yheN | putative AC              | STY4347 |
| 1196 | CHIP1938 | STM/STY    | 1 | 1 | STM4362 | hflX | putative G               | STY4719 |
| 1197 | CHIP2146 | STM/STY    | 1 | 1 | STM3279 | mtr  | HAAAP far                | STY3460 |
| 1198 | CHIP1978 | STM/STY    | 1 | 1 | STM4583 | trpR | transcriptio             | STY4930 |
| 1199 | CHIP1619 | STM/STY    | 1 | 1 | STM2820 | yqaB | putative ph              | STY2946 |
| 1200 | CHIP1643 | STM/STY    | 1 | 1 | STM2213 | yeiU | putative pe              | STY2449 |
| 1201 | CHIP2245 | STM/STY    | 1 | 1 | STM3112 | mltC | membrane                 | STY3267 |
| 1202 | CHIP2261 | STM/STY    | 1 | 0 | STM3061 | ygfA | putative lig             | STY3217 |
| 1203 | CHIP3345 | STM/STY    | 1 | 1 | STM0756 | nadA | quinolinate              | STY0797 |
| 1204 | CHIP3393 | STM/STY    | 1 | 1 | STM0821 | dinG | LexA regul               | STYrarB |
| 1205 | CHIP2190 | STM/STY    | 1 | 1 | STM3042 | recJ | ssDNA exc                | STY3198 |
| 1206 | CHIP2206 | STM/STY    | 1 | 1 | STM3267 | yraP | paral putati             | STY3450 |
| 1207 | CHIP3380 | STM/STY    | 1 | 1 | STM0806 | moaE | molybdopt                | STY0840 |
| 1208 | CHIP3412 | STM/STY    | 1 | 1 | STM0852 | yliG | putative Fe              | STY0891 |
| 1209 | CHIP0310 | STM/STY    | 1 | 1 | STM1384 | ttrC | Tetrathion               | STY1737 |
| 1210 | CHIP2217 | STM/STY    | 1 | 1 | STM3231 | yqjK | putative inr             | STY3411 |
| 1211 | CHIP0350 | STM/STY    | 0 | 0 | STM2771 | fljB | Flagellar synthesis:     | ph:     |
| 1212 | CHIP2257 | STM/STY    | 1 | 1 | STM3073 |      | putative AE              | STY3231 |
| 1213 | CHIP3407 | STM/STY    | 1 | 1 | STM0843 | pflF | putative py              | STY0882 |
| 1214 | CHIP4337 | STM/STY    | 1 | 1 | STM0378 | yaiY | putative inr             | STY0410 |
| 1215 | CHIP4369 | STM/STY    | 1 | 1 | STM0446 | bolA | morphoger                | STY0488 |
| 1216 | CHIP3680 | STM specil | 1 | 0 | STM4489 |      | putative superfamily I   | L       |
| 1217 | CHIP4315 | STM specil | 1 | 0 | STM2694 |      | Fels-2 prophage: simil   |         |
| 1218 | CHIP3709 | STM specil | 1 | 0 | STM4535 |      | putative PTS permeas     |         |
| 1219 | CHIP3608 | STM/STY    | 1 | 0 | STM4335 | ecnA | putative en              | STY4695 |
| 1220 | CHIP3601 | STM specil | 1 | 0 | STM4320 |      | putative bacterial regul |         |
| 1221 | CHIP3602 | STM/STY    | 1 | 1 | STM4324 | cutA | putative pe              | STY4683 |
| 1222 | CHIP3611 | STM/STY    | 1 | 1 | STM4340 | frdD | fumarate r               | STY4700 |
| 1223 | CHIP0770 | STM/STY    | 1 | 1 | STM2899 | invF | invasion pr              | STY3022 |
| 1224 | CHIP0844 | STM/STY    | 1 | 1 | STM1779 | ipk  | isopenteny               | STY1905 |
| 1225 | CHIP4028 | STM/STY    | 1 | 1 | STM2709 |      | Fels-2 prop              | STY4614 |
| 1226 | CHIP4005 | STM/STY    | 1 | 1 | STM2107 | wcaH | GDP-manr                 | STY2319 |
| 1227 | CHIP2109 | STM/STY    | 1 | 1 | STM3605 |      | putative ph              | STY4198 |
| 1228 | CHIP2138 | STM/STY    | 1 | 1 | STM3303 | rpmA | 50S riboso               | STY3482 |
| 1229 | CHIP2246 | STM/STY    | 1 | 1 | STM3111 | yggX | putative cy              | STY3266 |
| 1230 | CHIP2186 | STM/STY    | 1 | 1 | STM3052 |      | putative ou              | STY3208 |
| 1231 | CHIP1131 | STM/STY    | 1 | 1 | STM1888 | pykA | pyruvate ki              | STY2096 |
| 1232 | CHIP1203 | STM/STY    | 1 | 1 | STM1644 | ydbL | putative pe              | STY1425 |
| 1233 | CHIP1281 | STM/STY    | 1 | 1 | STM3361 | yhcN | putative ou              | STY3542 |
| 1234 | CHIP1372 | STM/STY    | 1 | 1 | STM2059 | yeeX | putative cy              | STY2264 |
| 1235 | CHIP1342 | STM/STY    | 1 | 1 | STM0290 |      | putative cy              | STY0320 |
| 1236 | CHIP4725 | STM/STY    | 1 | 1 | STM2426 |      | putative cy              | STY2662 |
| 1237 | CHIP3128 | STM specil | 1 | 0 | STM2584 | gogB | Gifsy-1 prophage: leuc   |         |



|      |          |            |   |   |         |             |                          |
|------|----------|------------|---|---|---------|-------------|--------------------------|
| 1238 | CHIP3090 | STM/STY    | 1 | 1 | STM2492 | putative Gl | STY2730                  |
| 1239 | CHIP3100 | STM/STY    | 1 | 1 | STM2518 | yfgJ        | putative cy              |
| 1240 | CHIP3045 | STM/STY    | 1 | 1 | STM2380 | yfcL        | putative cy              |
| 1241 | CHIP3054 | STM/STY    | 1 | 1 | STM2400 |             | putative inr             |
| 1242 | CHIP2872 | STM/STY    | 1 | 1 | STM1770 | chaB        | cation tran              |
| 1243 | CHIP3280 | STM/STY    | 1 | 1 | STM0635 | lipB        | putative lig             |
| 1244 | CHIP3311 | STM/STY    | 1 | 1 | STM0688 | ybfN        | putative lip             |
| 1245 | CHIP3035 | STM/STY    | 1 | 1 | STM2365 | folC        | multifuncti              |
| 1246 | CHIP0514 | STM specif | 1 | 0 | PSLT046 |             | putative carbonic anhy   |
| 1247 | CHIP0980 | STM specif | 1 | 0 | PSLT025 |             | putative cytoplasmic pr  |
| 1248 | CHIP1048 | STM specif | 1 | 0 | PSLT001 |             | putative cytoplasmic pr  |
| 1249 | CHIP1119 | STM specif | 1 | 0 | PSLT111 | finO        | conjugative transfer: re |
| 1250 | CHIP4324 | STM specif | 1 | 0 | PSLT061 |             | putative inner membra    |
| 1251 | CHIP1059 | STM specif | 1 | 0 | PSLT027 | ccdA        | toxin addiction system:  |
| 1252 | CHIP1049 | STM specif | 1 | 0 | PSLT002 |             | putative phospholipase   |
| 1253 | CHIP1052 | STM specif | 1 | 0 | PSLT005 | tap         | replication of plasmid   |
| 1254 | CHIP1013 | none       | 0 | 0 | R460003 |             |                          |
| 1255 | CHIP4780 | STM/STY    | 1 | 1 | STM0475 | acrB        | RND family               |
| 1256 | CHIP4784 | STM/STY    | 0 | 0 |         |             |                          |
| 1257 | CHIP4788 | STM/STY    | 0 | 0 |         |             |                          |
| 1258 | CHIP4792 | STM/STY    | 1 | 1 | STM0555 |             | pseudogen                |
| 1259 | CHIP4796 | STM/STY    | 0 | 0 |         |             |                          |
| 1260 | CHIP4800 | STM/STY    | 0 | 0 |         |             |                          |
| 1261 | CHIP5012 | STY specif | 0 | 1 |         |             | STY1498                  |
| 1262 | CHIP5028 | STY specif | 0 | 1 |         |             | STY1604                  |
| 1263 | CHIP5044 | STY specif | 0 | 1 |         |             | STY1620                  |
| 1264 | CHIP5059 | STY specif | 0 | 0 |         |             | STY1637                  |
| 1265 | CHIP5075 | STY specif | 0 | 1 |         |             | STY2004                  |
| 1266 | CHIP5096 | STY specif | 0 | 1 |         |             | STY2035                  |
| 1267 | CHIP5038 | STY specif | 0 | 1 |         |             | STY1614                  |
| 1268 | CHIP5053 | STY specif | 0 | 1 |         |             | STY1630                  |
| 1269 | CHIP5069 | STY specif | 0 | 1 |         |             | STY1886                  |
| 1270 | CHIP4998 | STY specif | 0 | 0 |         |             | STY1070                  |
| 1271 | CHIP5106 | STY specif | 0 | 1 |         |             | STY2046                  |
| 1272 | CHIP5121 | STY specif | 0 | 1 |         |             | STY2062                  |
| 1273 | CHIP5048 | STY specif | 0 | 1 |         |             | STY1624                  |
| 1274 | CHIP5063 | STM/STY    | 0 | 1 |         |             | STY1665                  |
| 1275 | CHIP5079 | STY specif | 0 | 0 |         |             | STY2015                  |
| 1276 | CHIP5100 | STY specif | 0 | 0 |         |             | STY2040                  |
| 1277 | CHIP5115 | STY specif | 0 | 0 |         |             | STY2056                  |
| 1278 | CHIP5131 | STY specif | 0 | 1 |         |             | STY2072                  |
| 1279 | CHIP5065 | STM/STY    | 0 | 1 |         |             | STY1742                  |
| 1280 | CHIP5081 | STY specif | 0 | 1 |         |             | STY2017                  |
| 1281 | CHIP5094 | STY specif | 0 | 1 |         |             | STY2033                  |
| 1282 | CHIP5203 | STY specif | 0 | 1 |         |             | STY3278                  |
| 1283 | CHIP5133 | STY specif | 0 | 1 |         |             | STY2074                  |
| 1284 | CHIP5149 | STY specif | 0 | 1 |         |             | STY2352                  |
| 1285 | CHIP5358 | STY specif | 0 | 1 |         |             | STY4599                  |
| 1286 | CHIP5379 | STM/STY    | 0 | 0 |         |             |                          |
| 1287 | CHIP5313 | STY specif | 0 | 1 |         |             | STY4546                  |
| 1288 | CHIP5327 | STY specif | 0 | 1 |         |             | STY4565                  |
| 1289 | CHIP5343 | STY specif | 0 | 1 |         |             | STY4583                  |

|      |          |            |   |   |         |                              |
|------|----------|------------|---|---|---------|------------------------------|
| 1290 | CHIP5359 | STY specif | 0 | 1 |         | STY4600                      |
| 1291 | CHIP5421 | STY specif | 0 | 1 |         | STY4834                      |
| 1292 | CHIP5437 | STY specif | 0 | 1 |         | STY4922                      |
| 1293 | CHIP5295 | STM/STY    | 0 | 1 |         | STY4480                      |
| 1294 | CHIP5311 | STY specif | 0 | 1 |         | STY4543                      |
| 1295 | CHIP5407 | STY specif | 0 | 1 |         | STY4756                      |
| 1296 | CHIP5422 | STM/STY    | 0 | 1 |         | STY4835                      |
| 1297 | CHIP2688 | STM/STY    | 1 | 1 | STM0172 | yadG putative AE STY0194     |
| 1298 | CHIP2720 | STM/STY    | 1 | 1 | STM0229 | lpxB tetraacyldis STY0252    |
| 1299 | CHIP2736 | STM/STY    | 1 | 1 | STM1511 | ydfG putative ox STY1550     |
| 1300 | CHIP0778 | STM/STY    | 1 | 1 | STM4292 | basR response r1 STY4491     |
| 1301 | CHIP0794 | STM/STY    | 1 | 1 | STM2396 | pgtA Phosphogl STY2633       |
| 1302 | CHIP2601 | STM/STY    | 1 | 1 | STM3872 | atpI membrane STY3906        |
| 1303 | CHIP0788 | STM/STY    | 1 | 1 | STM3385 | fis site-specific STY3565    |
| 1304 | CHIP0804 | STM/STY    | 1 | 1 | STM2034 | cibB synthesis c STY2239     |
| 1305 | CHIP0820 | STM/STY    | 1 | 1 | STM2018 | cobU bifunctiona STY2221     |
| 1306 | CHIP2635 | STM/STY    | 1 | 1 | STM0061 | citF2 putativ bifu STY0070   |
| 1307 | CHIP3235 | STM/STY    | 1 | 1 | STM3305 | ispB octaprenyl STY3484      |
| 1308 | CHIP3251 | STM specif | 1 | 0 | STM3343 | putative cytoplasmic pr      |
| 1309 | CHIP2653 | STM/STY    | 1 | 1 | STM0095 | rluA 23S rRNA STY0110        |
| 1310 | CHIP2677 | STM/STY    | 1 | 1 | STM0152 | aceE pyruvate de STY0175     |
| 1311 | CHIP2693 | STM specif | 1 | 0 | STM0177 | stiA putative fimbrial subun |
| 1312 | CHIP2709 | STM/STY    | 1 | 1 | STM0208 | dgt deoxyguan STY0230        |
| 1313 | CHIP2725 | STM/STY    | 1 | 1 | STM0240 | yaeJ putative-tR STY0265     |
| 1314 | CHIP2741 | STM/STY    | 1 | 0 | STM1524 | ynel putative su STY1536     |
| 1315 | CHIP3287 | STM/STY    | 1 | 1 | STM0648 | leuS leucine tRN STY0699     |
| 1316 | CHIP3303 | STM specif | 1 | 0 | STM0672 | putative inner membra        |
| 1317 | CHIP3327 | STM/STY    | 1 | 1 | STM0716 | putative ph STY0756          |
| 1318 | CHIP3720 | STM/STY    | 1 | 1 | STM4552 | putative inr STY4905         |
| 1319 | CHIP4032 | STM/STY    | 1 | 1 | STM2715 | Fels-2 prop STY4620          |
| 1320 | CHIP4056 | STM specif | 1 | 0 | STM2749 | putative cytoplasmic pr      |
| 1321 | CHIP3722 | STM/STY    | 1 | 1 | STM4563 | yjjU putative ph STY4914     |
| 1322 | CHIP3738 | STM/STY    | 1 | 1 | STM4593 | sthB putative fir STY4941    |
| 1323 | CHIP3762 | STM specif | 1 | 0 | STM0293 | putative cytoplasmic pr      |
| 1324 | CHIP3778 | STM specif | 1 | 0 | STM0326 | pseudogene; frameshii        |
| 1325 | CHIP3794 | STM specif | 1 | 0 | STM1053 | Gfsy-2 prophage              |
| 1326 | CHIP1122 | STM/STY    | 1 | 1 | STM4330 | mopA chaperone STY4690       |
| 1327 | CHIP3772 | STM/STY    | 1 | 1 | STM0312 | yafK putative pe STY0357     |
| 1328 | CHIP3788 | STM specif | 1 | 0 | STM1045 | Gfsy-2 prophage; prot        |
| 1329 | CHIP3804 | STM/STY    | 1 | 1 | STM1079 | yccV putative inr STY1102    |
| 1330 | CHIP3828 | STM/STY    | 1 | 1 | STM1122 | ycdC putative tra STY1157    |
| 1331 | CHIP3844 | STM/STY    | 1 | 1 | STM1157 | yceI putative se STY1194     |
| 1332 | CHIP3860 | STM/STY    | 1 | 1 | STM1205 | ycfF putative pr STY1245     |
| 1333 | CHIP3806 | STM/STY    | 1 | 1 | STM1081 | putative ou STY1104          |
| 1334 | CHIP2382 | STM/STY    | 1 | 1 | STM3400 | yrdB putative pe STY4397     |
| 1335 | CHIP2398 | STM/STY    | 1 | 1 | STM3456 | yheV putative cy STY4342     |
| 1336 | CHIP2414 | STM/STY    | 1 | 1 | STM3493 | mrcA transpeptid STY4303     |
| 1337 | CHIP2430 | STM specif | 1 | 0 | STM3518 | rtcA RNA 3'-terminal phosp   |
| 1338 | CHIP2446 | STM/STY    | 1 | 1 | STM3541 | gntU low affinity STY4270    |
| 1339 | CHIP3488 | STM/STY    | 1 | 1 | STM0964 | dmsA anaerobic c STY0962     |
| 1340 | CHIP4097 | STM/STY    | 1 | 1 | STM4014 | putative pe STY3865          |
| 1341 | CHIP4113 | STM/STY    | 1 | 1 | STM4075 | ydeY putative AE STY3795     |

|      |          |            |   |   |         |       |                          |
|------|----------|------------|---|---|---------|-------|--------------------------|
| 1342 | CHIP4137 | STM specil | 1 | 0 | STM4115 | pflC  | putative pyruvate form   |
| 1343 | CHIP4153 | STM/STY    | 1 | 1 | STM2859 | fhIA  | formate hyd STY2981      |
| 1344 | CHIP4169 | STM/STY    | 1 | 0 | STM2917 | ygbK  | paral putati STY3042     |
| 1345 | CHIP4131 | STM/STY    | 1 | 1 | STM4108 | gldA  | glycerol de STY3759      |
| 1346 | CHIP4147 | STM/STY    | 1 | 1 | STM2850 | hycD  | hydrogena: STY2972       |
| 1347 | CHIP4163 | STM/STY    | 1 | 0 | STM2908 |       | putative cyf STY3032     |
| 1348 | CHIP4187 | STM specil | 1 | 0 | STM2942 |       | putative transposase     |
| 1349 | CHIP3059 | STM/STY    | 1 | 1 | STM2413 | yfeC  | putative ne STY2652      |
| 1350 | CHIP3083 | STM/STY    | 1 | 1 | STM2480 | narQ  | sensory his STY2718      |
| 1351 | CHIP3517 | STM specil | 0 | 0 | STM1026 |       | Gifsy-2 prophage         |
| 1352 | CHIP4118 | STM/STY    | 1 | 1 | STM4085 | glpX  | unknown fu STY3785       |
| 1353 | CHIP4134 | STM specil | 1 | 0 | STM4112 | frwC  | PTS system fructose-li   |
| 1354 | CHIP3590 | STM/STY    | 1 | 1 | STM4287 | phnO  | putative re: STY4486     |
| 1355 | CHIP3614 | STM specil | 1 | 0 | STM4346 | yjeO  | putative inner membra    |
| 1356 | CHIP3062 | STM/STY    | 1 | 1 | STM2422 | xapA  | xanthosine STY2658       |
| 1357 | CHIP0217 | STM/STY    | 1 | 1 | STM1258 |       | putative AT STY1862      |
| 1358 | CHIP2316 | STM/STY    | 1 | 1 | STM1480 | pntB  | pyridine nu STY1588      |
| 1359 | CHIP0257 | STM/STY    | 1 | 0 | STM2514 | ratB  | putative outer membra    |
| 1360 | CHIP0281 | STM/STY    | 1 | 1 | STM0022 | bcfB  | fimbrial ch: STY0025     |
| 1361 | CHIP3625 | STM/STY    | 1 | 1 | STM4373 | yjfK  | putative cyf STY4729     |
| 1362 | CHIP3641 | STM/STY    | 1 | 1 | STM4409 | ytfM  | putative ou STY4768      |
| 1363 | CHIP3643 | STM/STY    | 1 | 1 | STM4416 | mpl   | UDP-N-ac: STY4775        |
| 1364 | CHIP2987 | STM/STY    | 1 | 1 | STM2274 |       | putative pe STY2501      |
| 1365 | CHIP3683 | STM specil | 1 | 0 | STM4492 |       | putative cytoplasmic pr  |
| 1366 | CHIP3699 | STM/STY    | 1 | 1 | STM4517 | yjiO  | putative Mf STY4874      |
| 1367 | CHIP2279 | STM/STY    | 1 | 1 | STM1133 |       | putative de STY1170      |
| 1368 | CHIP2303 | STM/STY    | 1 | 1 | STM1334 | infC  | protein cha STY1777      |
| 1369 | CHIP3029 | STM/STY    | 1 | 1 | STM2357 |       | putative an STY2587      |
| 1370 | CHIP0214 | STM/STY    | 1 | 1 | STM1255 |       | putative AE STY1865      |
| 1371 | CHIP0230 | STM specil | 1 | 0 | STM0198 | stfE  | putaive minor fimbrial s |
| 1372 | CHIP2329 | STM/STY    | 1 | 1 | STM1153 | msyB  | acidic prote STY1190     |
| 1373 | CHIP2345 | STM/STY    | 1 | 1 | STM1282 | yeaK  | putative cyf STY1835     |
| 1374 | CHIP2361 | STM/STY    | 1 | 1 | STM1427 | cfa   | cyclopropa STY1695       |
| 1375 | CHIP2331 | STM/STY    | 1 | 1 | STM1160 | solA  | putative sa STY1198      |
| 1376 | CHIP2347 | STM/STY    | 1 | 1 | STM1294 | ansA  | cytoplasmic STY1820      |
| 1377 | CHIP0288 | STM/STY    | 1 | 1 | STM3997 | dsbA  | periplasmic STY3883      |
| 1378 | CHIP3912 | STM/STY    | 1 | 1 | STM1311 | osmE  | transcriptio STY1802     |
| 1379 | CHIP0513 | STM specil | 0 | 0 | STM1868 | mig-3 | Homology to phage-tai    |
| 1380 | CHIP3960 | STM/STY    | 1 | 1 | STM1449 | tyrS  | tyrosine tRl STY1673     |
| 1381 | CHIP3946 | STM/STY    | 1 | 1 | STM1373 | sufS  | selenocyste STY1750      |
| 1382 | CHIP0547 | STM/STY    | 1 | 1 | STM1170 | mviN  | putative vir STY1209     |
| 1383 | CHIP0563 | STM/STY    | 1 | 1 | STM1416 | ssaO  | Secretion s STY1704      |
| 1384 | CHIP1414 | STM/STY    | 1 | 1 | STM3873 | gidB  | associate v STY3905      |
| 1385 | CHIP1430 | STM/STY    | 1 | 1 | STM2646 | yfiD  | putative for STY2839     |
| 1386 | CHIP1358 | STM/STY    | 1 | 1 | STM0236 | mesJ  | cell cycle p STY0261     |
| 1387 | CHIP1456 | STM/STY    | 1 | 1 | STM0401 | malZ  | maltodextri STY0439      |
| 1388 | CHIP1472 | STM/STY    | 1 | 1 | STM4189 | yjbB  | putative Pf STY4406      |
| 1389 | CHIP1488 | STM/STY    | 1 | 1 | STM4273 | yjcG  | putative Ss STY4471      |
| 1390 | CHIP3909 | STM/STY    | 1 | 1 | STM1306 | astB  | succinylarg STY1808      |
| 1391 | CHIP3925 | STM/STY    | 1 | 1 | STM1345 | ydiU  | putative cyf STY1765     |
| 1392 | CHIP3957 | STM/STY    | 1 | 1 | STM1439 | ydhF  | putative alc STY1683     |
| 1393 | CHIP0552 | STM specil | 1 | 0 | STM2770 | fljA  | Flagellar synthesis: rep |

|      |          |            |   |   |         |      |                         |         |
|------|----------|------------|---|---|---------|------|-------------------------|---------|
| 1394 | CHIP3999 | STM/STY    | 1 | 1 | STM2097 | rfbB | dTDP-gluc               | STY2307 |
| 1395 | CHIP1435 | STM/STY    | 1 | 1 | STM2571 |      | putative arr            | STY2817 |
| 1396 | CHIP1363 | STM/STY    | 1 | 1 | STM0205 | yadS | putative inr            | STY0227 |
| 1397 | CHIP1379 | STM/STY    | 1 | 1 | STM0076 | fixB | putative elk            | STY0086 |
| 1398 | CHIP1395 | STM/STY    | 1 | 1 | STM0147 | ampE | putative tra            | STY0169 |
| 1399 | CHIP2053 | STM/STY    | 1 | 1 | STM3613 | yhjJ | putative Zn             | STY4190 |
| 1400 | CHIP2069 | STM/STY    | 1 | 1 | STM3523 | glpR | transcriptio            | STY4280 |
| 1401 | CHIP1510 | STM/STY    | 1 | 1 | STM2305 | menE | o-succinylb             | STY2535 |
| 1402 | CHIP1534 | STM/STY    | 1 | 1 | STM2520 | yfgL | putative se             | STY2765 |
| 1403 | CHIP1019 | STM/STY    | 0 | 0 |         |      |                         | STY0450 |
| 1404 | CHIP1590 | STM/STY    | 1 | 1 | STM0558 | yfdH | putative gly            | STY0606 |
| 1405 | CHIP2024 | STM/STY    | 1 | 1 | STM4577 | smp  | membrane                | STY4924 |
| 1406 | CHIP2040 | STM/STY    | 1 | 1 | STM3666 | ysaA | paral putati            | STY4132 |
| 1407 | CHIP2056 | STM/STY    | 1 | 1 | STM3604 |      | putative inr            | STY4199 |
| 1408 | CHIP2072 | STM/STY    | 1 | 1 | STM3494 | yrfE | putative N1             | STY4302 |
| 1409 | CHIP1513 | STM/STY    | 1 | 1 | STM2290 | yfaV | putative Mf             | STY2520 |
| 1410 | CHIP1537 | STM/STY    | 1 | 1 | STM2497 | uraA | NCS2 fami               | STY2738 |
| 1411 | CHIP1523 | STM/STY    | 1 | 1 | STM2337 | ackA | acetate kin             | STY2567 |
| 1412 | CHIP1000 | STM/STY    | 0 | 1 | STM1015 |      | Gifsy-2 pro             | STY1023 |
| 1413 | CHIP1571 | STM/STY    | 1 | 1 | STM0532 | arcC | putative ca             | STY0580 |
| 1414 | CHIP1995 | STM/STY    | 1 | 1 | STM4407 | ytfL | putative he             | STY4766 |
| 1415 | CHIP3159 | STM specil | 1 | 0 | STM2616 |      | Gifsy-1 prophage: simi  |         |
| 1416 | CHIP3175 | STM/STY    | 1 | 1 | STM3179 | mdaB | NADPH sp                | STY3356 |
| 1417 | CHIP0595 | STM/STY    | 1 | 1 | STM3484 | dam  | DNA adeni               | STY4312 |
| 1418 | CHIP0707 | STM/STY    | 1 | 1 | STM2206 | fruF | phosphoen               | STY2442 |
| 1419 | CHIP0723 | STM/STY    | 1 | 1 | STM2278 | nrdB | ribonucleo              | STY2507 |
| 1420 | CHIP0755 | STM/STY    | 1 | 1 | STM2456 | eutL | putative ca             | STY2693 |
| 1421 | CHIP1806 | STM/STY    | 1 | 1 | STM4080 |      | putative rib            | STY3790 |
| 1422 | CHIP1838 | STM/STY    | 1 | 1 | STM0695 | ybfE | LexA regul              | STY0733 |
| 1423 | CHIP0742 | STM/STY    | 1 | 1 | STM1242 | envE | putative en             | STY1882 |
| 1424 | CHIP0766 | STM/STY    | 1 | 1 | STM2886 | sicA | surface pre             | STY3009 |
| 1425 | CHIP1825 | STM/STY    | 1 | 1 | STM3996 | yihE | putative ho             | STY3884 |
| 1426 | CHIP1857 | STM/STY    | 1 | 1 | STM0853 | yliH | putative cy             | STY0893 |
| 1427 | CHIP1889 | STM/STY    | 1 | 1 | STM3464 | prkB | putative ph             | STY4333 |
| 1428 | CHIP0687 | STM/STY    | 1 | 1 | STM4187 | iclR | acetate op              | STY4404 |
| 1429 | CHIP1260 | STM/STY    | 1 | 1 | STM1676 |      | putative alk            | STY1388 |
| 1430 | CHIP0457 | STM/STY    | 1 | 1 | STM3416 | rpsD | 30S riboso              | STY4382 |
| 1431 | CHIP0473 | STM/STY    | 1 | 1 | STM2184 | sanA | vancomycil              | STY2414 |
| 1432 | CHIP0106 | STM/STY    | 1 | 1 | STM1731 |      | putative ca             | STY1320 |
| 1433 | CHIP0130 | STM/STY    | 1 | 1 | STM4173 | hydH | sensory kir             | STY3712 |
| 1434 | CHIP4729 | STM/STY    | 0 | 1 | STM2505 |      | putative inr            | STY2746 |
| 1435 | CHIP4216 | STM/STY    | 1 | 1 | STM3003 | ptsP | General P1              | STY3144 |
| 1436 | CHIP0396 | STM/STY    | 0 | 0 | STM2891 | spaO | surface presentation of |         |
| 1437 | CHIP0412 | STM/STY    | 1 | 1 | STM2065 | phsA | Hydrogen $\epsilon$     | STY2271 |
| 1438 | CHIP1271 | STM/STY    | 1 | 1 | STM3363 | yhcO | putative cy             | STY3544 |
| 1439 | CHIP1295 | STM/STY    | 1 | 1 | STM0016 |      | putative pr             | STY0016 |
| 1440 | CHIP4676 | STM/STY    | 1 | 1 | STM0560 |      | pseudogen               | STY0609 |
| 1441 | CHIP1305 | STM/STY    | 1 | 1 | STM0047 | lspA | prolipoprot             | STY0056 |
| 1442 | CHIP4686 | STM/STY    | 1 | 1 | STM0715 |      | putative cy             | STY0755 |
| 1443 | CHIP4702 | STM/STY    | 1 | 1 | STM1666 |      | pseudogen               | STY1398 |
| 1444 | CHIP0143 | STM/STY    | 1 | 1 | STM4018 | yihP | putative Gf             | STY3860 |
| 1445 | CHIP0175 | STM/STY    | 1 | 1 | STM2408 | mnhH | Nramp fam               | STY2649 |

|      |          |            |   |   |         |      |                          |         |
|------|----------|------------|---|---|---------|------|--------------------------|---------|
| 1446 | CHIP0391 | STM/STY    | 1 | 1 | STM2189 | mgIA | ABC super                | STY2422 |
| 1447 | CHIP2308 | STM/STY    | 1 | 1 | STM1365 | ydiJ | paral putati             | STY1758 |
| 1448 | CHIP1700 | STM/STY    | 1 | 1 | STM1763 | narH | nitrate redt             | STY1289 |
| 1449 | CHIP1716 | STM/STY    | 1 | 1 | STM1798 | ycgR | putative inr             | STY1926 |
| 1450 | CHIP1732 | STM/STY    | 1 | 1 | STM3020 |      | putative tra             | STY3165 |
| 1451 | CHIP1748 | STM/STY    | 1 | 1 | STM2962 | gudT | putative Mf              | STY3100 |
| 1452 | CHIP1764 | STM/STY    | 1 | 1 | STM3008 | tas  | putative alc             | STY3151 |
| 1453 | CHIP0004 | STM/STY    | 1 | 1 | STM3984 | pepQ | proline dipε             | STY3576 |
| 1454 | CHIP0523 | STM/STY    | 1 | 1 | STM3539 | asd  | aspartate-ε              | STY4271 |
| 1455 | CHIP0967 | STM/STY    | 1 | 1 | STM0092 | surA | peptidyl-prc             | STY0107 |
| 1456 | CHIP0060 | STM/STY    | 1 | 1 | STM3922 | rffG | dTDP-glucı               | STY3633 |
| 1457 | CHIP0076 | STM/STY    | 1 | 1 | STM3903 | ilvE | branched-c               | STY3654 |
| 1458 | CHIP1703 | STM/STY    | 1 | 1 | STM1752 | galU | glucose-1-ı              | STY1298 |
| 1459 | CHIP0094 | STM/STY    | 1 | 1 | STM4153 | rpoB | RNA polym                | STY3732 |
| 1460 | CHIP1713 | STM/STY    | 1 | 1 | STM1808 |      | putative cyı             | STY1937 |
| 1461 | CHIP0902 | STM/STY    | 1 | 1 | STM0103 | araB | L-ribulokinε             | STY0120 |
| 1462 | CHIP0926 | STM/STY    | 1 | 1 | STM1745 | oppB | ABC super                | STY1305 |
| 1463 | CHIP0942 | STM/STY    | 1 | 1 | STM2166 | bgIX | beta-D-glucı             | STY2396 |
| 1464 | CHIP0007 | STM/STY    | 1 | 0 | STM3981 |      | putative cytoplasmic pr  |         |
| 1465 | CHIP4456 | STM/STY    | 1 | 1 | STM0597 | entB | 2,3-dihydr               | STY0641 |
| 1466 | CHIP2848 | STM/STY    | 1 | 1 | STM1710 | pgpB | phosphatid               | STY1341 |
| 1467 | CHIP2864 | STM/STY    | 1 | 1 | STM1755 | yhcJ | putative cyı             | STY1295 |
| 1468 | CHIP2784 | STM specil | 1 | 0 | STM1596 | ydcX | putative inner membra    |         |
| 1469 | CHIP2800 | STM/STY    | 1 | 1 | STM1622 | ydcG | paral putati             | STY1442 |
| 1470 | CHIP2824 | STM/STY    | 1 | 1 | STM1657 |      | putative mε              | STY1408 |
| 1471 | CHIP2834 | STM/STY    | 1 | 1 | STM1672 |      | putative cyı             | STY1392 |
| 1472 | CHIP4395 | STM/STY    | 1 | 1 | STM0490 | aes  | acetyl esteı             | STY0534 |
| 1473 | CHIP1151 | STM/STY    | 1 | 1 | STM0622 | citE | citrate lyası            | STY0671 |
| 1474 | CHIP1175 | STM/STY    | 1 | 1 | STM3750 | yicJ | putative Gf              | STY4043 |
| 1475 | CHIP1191 | STM/STY    | 1 | 1 | STM1581 | yddE | putative ph              | STY1484 |
| 1476 | CHIP2851 | STM/STY    | 1 | 1 | STM1716 | sohB | putative pe              | STY1334 |
| 1477 | CHIP1217 | STM/STY    | 1 | 1 | STM1607 |      | putative ou              | STY1457 |
| 1478 | CHIP2765 | STM/STY    | 1 | 1 | STM1561 |      | putative ou              | STY1502 |
| 1479 | CHIP2781 | STM/STY    | 1 | 0 | STM1593 | srfA | ssrAB activ              | STY1472 |
| 1480 | CHIP2797 | STM/STY    | 1 | 1 | STM1619 |      | cryptic ami              | STY1445 |
| 1481 | CHIP2925 | STM/STY    | 1 | 1 | STM1883 | purT | phosphorib               | STY2089 |
| 1482 | CHIP2845 | STM/STY    | 1 | 1 | STM1701 | yciW | putative cyı             | STY1351 |
| 1483 | CHIP2847 | STM/STY    | 1 | 1 | STM1708 | yciM | putative N-              | STY1343 |
| 1484 | CHIP4304 | STM/STY    | 1 | 1 | STM2677 | ffh  | 4.5S-RNP ı               | STY2864 |
| 1485 | CHIP4232 | STM/STY    | 1 | 1 | STM3031 |      | ail and omı              | STY3179 |
| 1486 | CHIP4248 | STM specil | 1 | 0 | STM3082 |      | putative zinc-binding dı |         |
| 1487 | CHIP4360 | STM/STY    | 1 | 1 | STM0433 | thiJ | 4-methyl-5ı              | STY0472 |
| 1488 | CHIP4376 | STM/STY    | 1 | 1 | STM0457 | cof  | putative hy              | STY0499 |
| 1489 | CHIP2474 | STM specil | 1 | 0 | STM3599 |      | putative inner membra    |         |
| 1490 | CHIP4610 | STM/STY    | 1 | 1 | STM3050 | yqfB | putative cyı             | STY3206 |
| 1491 | CHIP2514 | STM/STY    | 1 | 1 | STM3685 | mtlA | PTS family               | STY4111 |
| 1492 | CHIP2546 | STM/STY    | 1 | 1 | STM3777 |      | putative cyı             | STY4007 |
| 1493 | CHIP4203 | STM/STY    | 1 | 1 | STM2976 | fucl | L-fucose is              | STY3116 |
| 1494 | CHIP4227 | STM/STY    | 1 | 1 | STM3025 |      | putative cyı             | STY3172 |
| 1495 | CHIP4277 | STM/STY    | 1 | 1 | STM3142 |      | putative fer             | STY3313 |
| 1496 | CHIP2477 | STM/STY    | 1 | 1 | STM3603 | treF | cytoplasmı               | STY4200 |
| 1497 | CHIP4613 | STM/STY    | 1 | 1 | STM3104 | yggW | putative ox              | STY3257 |

|      |          |            |   |   |          |      |                           |          |
|------|----------|------------|---|---|----------|------|---------------------------|----------|
| 1498 | CHIP2517 | STM/STY    | 1 | 1 | STM3693  | lldR | putative tra              | STY4103  |
| 1499 | CHIP2549 | STM/STY    | 1 | 1 | STM3780  |      | putative fru              | STY4003  |
| 1500 | CHIP4302 | STM/STY    | 1 | 1 | STM2668  |      | putative cyf              | STY2855  |
| 1501 | CHIP1636 | STM/STY    | 1 | 1 | STM2160  | yehV | putative tra              | STY2390  |
| 1502 | CHIP1652 | STM/STY    | 1 | 1 | STM2082  | rfbP | LPS side c                | STY2291  |
| 1503 | CHIP1668 | STM/STY    | 1 | 1 | STM2114  | wcaB | putative ac               | STY2327  |
| 1504 | CHIP4568 | STM/STY    | 1 | 1 | STM2170  | yohD | putative Dε               | STY2400  |
| 1505 | CHIP1900 | STM/STY    | 1 | 1 | STM3404  | smg  | putative cyf              | STY4393  |
| 1506 | CHIP2108 | STM/STY    | 1 | 1 | STM3607  | yhjC | putative tra              | STY4196  |
| 1507 | CHIP1694 | STM/STY    | 1 | 1 | STM1811  | ycgN | putative cyf              | STY1941  |
| 1508 | CHIP2102 | STM/STY    | 1 | 1 | STM3646  | yiaE | 2-keto-D-g                | STY4156  |
| 1509 | CHIP2118 | STM/STY    | 1 | 1 | STM3549  |      | putative inr              | STY4262  |
| 1510 | CHIP2134 | STM/STY    | 1 | 1 | STM3326  | mtgA | peptidoglyc               | STY3505  |
| 1511 | CHIP1966 | STM/STY    | 1 | 1 | STM4480  | yjgQ | putative pe               | STY4818  |
| 1512 | CHIP1982 | STM/STY    | 1 | 1 | STM4322  | yjdC | putative ba               | STY4681  |
| 1513 | CHIP2136 | STM/STY    | 1 | 1 | STM3309  | yrbB | putative ST               | STY3488  |
| 1514 | CHIP2152 | STM/STY    | 1 | 1 | STM3244  | tdcB | threonine c               | STY3427  |
| 1515 | CHIP2168 | STM/STY    | 1 | 1 | STM3146  | hybD | putative prc              | STY3317  |
| 1516 | CHIP1609 | STM/STY    | 1 | 1 | STM2835  | srID | glucitol (so              | STY2956  |
| 1517 | CHIP4509 | STM specil | 1 | 0 | STM2003  |      | pseudogene; frameshil     |          |
| 1518 | CHIP4525 | STM/STY    | 0 | 0 |          |      | STY2429                   |          |
| 1519 | CHIP4527 | STM/STY    | 1 | 1 | STM2198  |      | putative reϕ              | STY2432  |
| 1520 | CHIP4543 | STM specil | 1 | 0 | STM2234  |      | putative tail fiber assen |          |
| 1521 | CHIP1683 | STM/STY    | 1 | 1 | STM2205  | fruK | fructose-1-               | STY2441  |
| 1522 | CHIP1899 | STM/STY    | 1 | 1 | STM3403  | yrdD | putative D†               | STY4394  |
| 1523 | CHIP1915 | STM/STY    | 1 | 1 | STM3434  | rpsC | 30S riboso                | STY4364  |
| 1524 | CHIP1931 | STM/STY    | 1 | 1 | STM3033  |      | putative nu               | STY3182  |
| 1525 | CHIP0323 | STM/STY    | 1 | 1 | STM0874  | mdaA | oxygen-ins                | STY0907  |
| 1526 | CHIP2230 | STM/STY    | 1 | 1 | STM3198  |      | putative inr              | STY3377  |
| 1527 | CHIP2254 | STM/STY    | 1 | 1 | STM3091  | galP | MFS family                | STY3244  |
| 1528 | CHIP2270 | STM/STY    | 1 | 1 | STM1078  |      | putative cyf              | STY1101  |
| 1529 | CHIP3378 | STM/STY    | 1 | 1 | STM0804  | moaC | molybdoptε                | STY0838  |
| 1530 | CHIP3410 | STM/STY    | 1 | 1 | STM0850  | yliC | putative AE               | STY0889  |
| 1531 | CHIP0374 | STM/STY    | 1 | 1 | STM1091  | sopB | Salmonella                | STY1121  |
| 1532 | CHIP3341 | STM/STY    | 1 | 1 | STM0745  | tolQ | tol protein,              | STY0791  |
| 1533 | CHIP3373 | STM/STY    | 1 | 1 | STM0794  | bioB | biotin syntf              | STY0827  |
| 1534 | CHIP3405 | STM/STY    | 1 | 1 | STM0841  | ybiU | putative cyf              | STY0880  |
| 1535 | CHIP2194 | STM/STY    | 1 | 1 | STM3331  | gltD | glutamate :               | STY3511  |
| 1536 | CHIP0327 | STM/STY    | 1 | 1 | STM3757  | misL | putative au               | STY4030  |
| 1537 | CHIP4301 | STM/STY    | 1 | 1 | STM2665  | yfiA | ribosome a                | STY2853  |
| 1538 | CHIP1493 | STM/STY    | 1 | 1 | STM2387  | sixA | phosphohis                | STY2619  |
| 1539 | CHIP1479 | STM/STY    | 1 | 1 | STM4240  | yjbJ | putative cyf              | STY4436  |
| 1540 | CHIP0458 | STM/STY    | 1 | 1 | STM3415  | rpoA | RNA polymr                | STY4383  |
| 1541 | CHIP0626 | STM/STY    | 1 | 1 | STM1692  | sapA | ABC super                 | STY1369  |
| 1542 | CHIP1558 | STM/STY    | 1 | 1 | STM0462  | glnK | regulatory                | STY0506  |
| 1543 | CHIP1816 | STM/STY    | 1 | 1 | STM4042A |      | putative br:              | STY3832  |
| 1544 | CHIP1875 | STM/STY    | 1 | 1 | STM0721  |      | putative gly              | STY0761  |
| 1545 | CHIP0961 | STM/STY    | 1 | 1 | STM4141  |      | putative cyf              | STY3739a |
| 1546 | CHIP0993 | STM specil | 1 | 0 | STM2439  | yfeL | putative membrane cal     |          |
| 1547 | CHIP0996 | STM specil | 0 | 0 | STM1011  |      | Gifsy-2 prophage          |          |
| 1548 | CHIP3548 | STM specil | 1 | 0 | STM4206  |      | putative phage glucose    |          |
| 1549 | CHIP1212 | STM/STY    | 1 | 0 | STM2722  |      | Fels-2 prophage: simil:   |          |

|      |          |            |   |   |         |      |                         |         |
|------|----------|------------|---|---|---------|------|-------------------------|---------|
| 1550 | CHIP1134 | STM/STY    | 1 | 1 | STM1882 | yebG | DNA dama                | STY2088 |
| 1551 | CHIP4030 | STM/STY    | 0 | 0 | STM2713 |      | Fels-2 prophage: simil  |         |
| 1552 | CHIP4039 | STM specil | 1 | 0 | STM2727 |      | Fels-2 prophage: simil  |         |
| 1553 | CHIP4121 | STM/STY    | 1 | 1 | STM4088 | yiiU | putative cyf            | STY3782 |
| 1554 | CHIP4179 | STM/STY    | 1 | 1 | STM2931 | ygbQ | putative Se             | STY3056 |
| 1555 | CHIP3949 | STM/STY    | 1 | 1 | STM1376 | lppB | putative mε             | STY1746 |
| 1556 | CHIP3942 | STM/STY    | 1 | 1 | STM1367 | ydiH | putative cyf            | STY1756 |
| 1557 | CHIP3959 | STM/STY    | 1 | 0 | STM1447 | ydhA | putative ou             | STY1675 |
| 1558 | CHIP0265 | STM/STY    | 1 | 1 | STM1056 |      | Gifsy-2 pro             | STY1077 |
| 1559 | CHIP0243 | STM/STY    | 1 | 1 | STM2464 | eutN | putative de             | STY2701 |
| 1560 | CHIP1398 | STM/STY    | 1 | 1 | STM0160 | yacL | putative cyf            | STY0182 |
| 1561 | CHIP4663 | STM/STY    | 1 | 0 | STM4191 |      | putative cyf            | STY4408 |
| 1562 | CHIP2913 | STM/STY    | 1 | 1 | STM1856 |      | putative cyf            | STY1988 |
| 1563 | CHIP2898 | STM/STY    | 1 | 1 | STM1833 |      | putative inr            | STY1962 |
| 1564 | CHIP2922 | STM/STY    | 1 | 1 | STM1875 | yobA | putative ho             | STY2081 |
| 1565 | CHIP2917 | STM/STY    | 1 | 1 | STM1869 |      | Homology                | STY1043 |
| 1566 | CHIP4710 | STM/STY    | 1 | 1 | STM1926 |      | putative cyf            | STY2135 |
| 1567 | CHIP1056 | STM specil | 0 | 0 | PSLT022 |      | pseudogene; frameshii   |         |
| 1568 | CHIP1104 | STM specil | 1 | 0 | PSLT095 | traN | conjugative transfer: a |         |
| 1569 | CHIP1073 | STM specil | 0 | 0 | PSLT058 |      | pseudogene; in-frame    |         |
| 1570 | CHIP1105 | STM specil | 1 | 0 | PSLT096 | trbE | conjugative transfer    |         |
| 1571 | CHIP1050 | STM specil | 1 | 0 | PSLT003 | repC | DNA replication         |         |
| 1572 | CHIP1098 | STM specil | 1 | 0 | PSLT089 | trbl | conjugative transfer    |         |
| 1573 | CHIP0944 | none       | 0 | 0 | R460027 | stbB |                         |         |
| 1574 | CHIP0954 | none       | 0 | 0 | R460022 | fip  |                         |         |
| 1575 | CHIP4889 | none       | 0 | 0 | R460034 | ccgD |                         |         |
| 1576 | CHIP4876 | none       | 0 | 0 | R460011 | traA |                         |         |
| 1577 | CHIP4870 | none       | 0 | 0 | R460004 | ORF2 |                         |         |
| 1578 | CHIP4897 | none       | 0 | 0 | R460048 | orfD |                         |         |
| 1579 | CHIP4801 | STM/STY    | 0 | 0 |         |      |                         |         |
| 1580 | CHIP4805 | STM specil | 0 | 0 |         |      |                         |         |
| 1581 | CHIP4809 | STM/STY    | 0 | 0 |         |      |                         |         |
| 1582 | CHIP4813 | STM specil | 0 | 0 |         |      |                         |         |
| 1583 | CHIP4817 | STM specil | 1 | 0 | STM2614 |      | Gifsy-1 prophage        |         |
| 1584 | CHIP4821 | STM/STY    | 0 | 0 |         |      |                         |         |
| 1585 | CHIP5189 | STY specif | 0 | 1 |         |      |                         | STY3071 |
| 1586 | CHIP5119 | STY specif | 0 | 1 |         |      |                         | STY2060 |
| 1587 | CHIP5135 | STY specif | 0 | 1 |         |      |                         | STY2076 |
| 1588 | CHIP5240 | STM/STY    | 0 | 0 |         |      |                         | STY3677 |
| 1589 | CHIP5254 | STY specif | 0 | 1 |         |      |                         | STY3693 |
| 1590 | CHIP5270 | STY specif | 0 | 1 |         |      |                         | STY3949 |
| 1591 | CHIP5211 | STY specif | 0 | 1 |         |      |                         | STY3344 |
| 1592 | CHIP5227 | STY specif | 0 | 1 |         |      |                         | STY3663 |
| 1593 | CHIP5241 | STY specif | 0 | 1 |         |      |                         | STY3679 |
| 1594 | CHIP5256 | STY specif | 0 | 0 |         |      |                         |         |
| 1595 | CHIP5272 | STM/STY    | 0 | 1 |         |      |                         | STY4036 |
| 1596 | CHIP5015 | STM/STY    | 0 | 1 |         |      |                         | STY1555 |
| 1597 | CHIP5221 | STY specif | 0 | 1 |         |      |                         | STY3645 |
| 1598 | CHIP5236 | STY specif | 0 | 1 |         |      |                         | STY3673 |
| 1599 | CHIP5251 | STY specif | 0 | 0 |         |      |                         | STY3689 |
| 1600 | CHIP5266 | STY specif | 0 | 1 |         |      |                         | STY3919 |
| 1601 | CHIP4922 | STY specif | 0 | 1 |         |      |                         | STY0300 |

|      |          |            |   |   |         |      |                          |
|------|----------|------------|---|---|---------|------|--------------------------|
| 1602 | CHIP4938 | STY specif | 0 | 1 |         |      | STY0346                  |
| 1603 | CHIP5238 | STM/STY    | 0 | 0 |         |      | STY3675                  |
| 1604 | CHIP5171 | STY specif | 0 | 0 |         |      | STY2882                  |
| 1605 | CHIP5187 | STY specif | 0 | 1 |         |      | STY3069                  |
| 1606 | CHIP4924 | STM/STY    | 0 | 1 |         |      | STY0306                  |
| 1607 | CHIP4940 | STY specif | 0 | 1 |         |      | STY0348                  |
| 1608 | CHIP4956 | STY specif | 0 | 1 |         |      | STY1016                  |
| 1609 | CHIP5278 | STM/STY    | 0 | 0 |         |      |                          |
| 1610 | CHIP5291 | STY specif | 0 | 1 |         |      | STY4412                  |
| 1611 | CHIP5314 | STY specif | 0 | 1 |         |      | STY4547                  |
| 1612 | CHIP5411 | STY specif | 0 | 1 |         |      | STY4823                  |
| 1613 | CHIP5426 | STM/STY    | 0 | 1 |         |      | STY4843                  |
| 1614 | CHIP5279 | STM/STY    | 0 | 1 |         |      | STY4143                  |
| 1615 | CHIP5348 | STY specif | 0 | 1 |         |      | STY4588                  |
| 1616 | CHIP5282 | STY specif | 0 | 1 |         |      | STY4207                  |
| 1617 | CHIP5296 | STM/STY    | 0 | 1 |         |      | STY4512                  |
| 1618 | CHIP5393 | STY specif | 0 | 1 |         |      | STY4667                  |
| 1619 | CHIP5408 | STM/STY    | 0 | 1 |         |      | STY4810                  |
| 1620 | CHIP5423 | STY specif | 0 | 1 |         |      | STY4837                  |
| 1621 | CHIP3264 | STM/STY    | 1 | 1 | STM3371 | yhdE | putative int STY3551     |
| 1622 | CHIP3296 | STM specil | 1 | 0 | STM0657 | ybeU | putative cytoplasmic pr  |
| 1623 | CHIP3312 | STM/STY    | 1 | 1 | STM0691 |      | putative pe STY0729      |
| 1624 | CHIP2569 | STM/STY    | 1 | 1 | STM3822 | torA | trimethylar STY3956      |
| 1625 | CHIP0802 | STM specil | 1 | 0 | STM3171 | ygiK | putative integral memb   |
| 1626 | CHIP0818 | STM/STY    | 1 | 1 | STM2020 | cbiO | synthesis c STY2223      |
| 1627 | CHIP2579 | STM/STY    | 1 | 1 | STM3834 |      | putative tra STY3944     |
| 1628 | CHIP2595 | STM/STY    | 1 | 1 | STM3857 | pstS | ABC super STY3926        |
| 1629 | CHIP0828 | STM/STY    | 1 | 1 | STM3787 | uhpT | MFS family STY3995       |
| 1630 | CHIP2643 | STM/STY    | 1 | 0 | STM0079 | yaaU | putative Mf STY0089      |
| 1631 | CHIP2667 | STM/STY    | 1 | 1 | STM0129 | murC | L-alanine a STY0149      |
| 1632 | CHIP2683 | STM/STY    | 1 | 1 | STM0163 |      | pyridoxine STY0185       |
| 1633 | CHIP2661 | STM/STY    | 1 | 1 | STM0120 | yabC | putative S- STY0140      |
| 1634 | CHIP3253 | STM/STY    | 1 | 1 | STM3345 | rplM | 50S riboso STY3525       |
| 1635 | CHIP3269 | STM/STY    | 1 | 1 | STM3380 | accC | acetyl CoA STY3560       |
| 1636 | CHIP3285 | STM/STY    | 1 | 1 | STM0644 | cobD | putative arr STY0695     |
| 1637 | CHIP3301 | STM/STY    | 1 | 1 | STM0665 | gltI | ABC super STY0710        |
| 1638 | CHIP3317 | STM/STY    | 1 | 1 | STM0698 | pgm  | phosphogl STY0736        |
| 1639 | CHIP2719 | STM/STY    | 1 | 1 | STM0227 | fabZ | (3R)-hydro STY0250       |
| 1640 | CHIP2735 | STM/STY    | 1 | 1 | STM1509 | ydfZ | putative cyf STY1552     |
| 1641 | CHIP4000 | STM/STY    | 1 | 1 | STM2098 | galF | putative glt STY2308     |
| 1642 | CHIP4016 | STM/STY    | 1 | 1 | STM2125 | yegD | putative he STY2338      |
| 1643 | CHIP3744 | STM/STY    | 1 | 1 | STM0255 | yafB | 2,5-diketo- STY0276      |
| 1644 | CHIP3768 | STM/STY    | 1 | 1 | STM0300 | safB | putative fir STY0335     |
| 1645 | CHIP4018 | STM/STY    | 1 | 1 | STM2129 | yegB | putative Mf STY2342      |
| 1646 | CHIP4034 | STM/STY    | 1 | 1 | STM2719 |      | Fels-2 proç STY4624      |
| 1647 | CHIP4058 | STM specil | 1 | 0 | STM2751 |      | putative PTS enzyme I    |
| 1648 | CHIP4074 | STM specil | 1 | 0 | STM2767 |      | putative Superfamily I I |
| 1649 | CHIP4090 | STM/STY    | 1 | 1 | STM2795 | ygaU | putative Ly STY2915      |
| 1650 | CHIP3818 | STM/STY    | 1 | 0 | STM1099 | hpaB | 4-hydroxyp STY1131       |
| 1651 | CHIP4068 | STM specil | 1 | 0 | STM2761 |      | putative inner membra    |
| 1652 | CHIP4084 | STM/STY    | 1 | 0 | STM2786 |      | tricarboxylic transport  |
| 1653 | CHIP3812 | STM/STY    | 1 | 0 | STM1089 |      | putative inner membra    |



|      |          |            |   |   |         |      |                           |         |
|------|----------|------------|---|---|---------|------|---------------------------|---------|
| 1654 | CHIP2388 | STM/STY    | 1 | 1 | STM3419 | rpmJ | 50S riboso                | STY4379 |
| 1655 | CHIP2404 | STM/STY    | 1 | 1 | STM3466 | crp  | catabolite ε              | STY4331 |
| 1656 | CHIP2420 | STM/STY    | 1 | 1 | STM3499 | yhgE | putative inr              | STY4297 |
| 1657 | CHIP3814 | STM/STY    | 1 | 1 | STM1094 | pipD | Pathogenic                | STY1126 |
| 1658 | CHIP3830 | STM/STY    | 1 | 1 | STM1127 |      | putative tra              | STY1163 |
| 1659 | CHIP3846 | STM/STY    | 1 | 1 | STM1161 | yceP | putative cyf              | STY1199 |
| 1660 | CHIP3862 | STM/STY    | 1 | 1 | STM1207 | ycfM | putative ou               | STY1247 |
| 1661 | CHIP3878 | STM/STY    | 1 | 1 | STM1239 |      | putative cyf              | STY1893 |
| 1662 | CHIP3894 | STM/STY    | 1 | 1 | STM1280 | yeaL | putative inr              | STY1838 |
| 1663 | CHIP3496 | STM/STY    | 1 | 1 | STM0980 | cmk  | cytidine mc               | STY0980 |
| 1664 | CHIP3529 | STM specil | 1 | 0 | STM1038 |      | Gifsy-2 prophage; prot    |         |
| 1665 | CHIP3553 | STM specil | 1 | 0 | STM4211 |      | putative phage tail prot  |         |
| 1666 | CHIP3569 | STM/STY    | 1 | 1 | STM4245 | qor  | quinone ox                | STY4441 |
| 1667 | CHIP3585 | STM/STY    | 1 | 1 | STM4282 | nrfG | part of forr              | STY4481 |
| 1668 | CHIP4177 | STM/STY    | 1 | 1 | STM2928 | ygbO | paral putati              | STY3053 |
| 1669 | CHIP3563 | STM/STY    | 1 | 1 | STM4223 | yjbF | putative ou               | STY4419 |
| 1670 | CHIP3579 | STM/STY    | 1 | 1 | STM4270 |      | putative tra              | STY4468 |
| 1671 | CHIP3595 | STM/STY    | 1 | 1 | STM4306 |      | putative an               | STY4506 |
| 1672 | CHIP3043 | STM/STY    | 1 | 1 | STM2378 | fabB | 3-oxoacyl-[               | STY2609 |
| 1673 | CHIP3067 | STM/STY    | 1 | 1 | STM2435 | pdxK | pyridoxal-p               | STY2672 |
| 1674 | CHIP3467 | STM specil | 1 | 0 | STM0924 |      | Fels-1 prophage; putat    |         |
| 1675 | CHIP4102 | STM/STY    | 1 | 1 | STM4034 | fdhE | putative for              | STY3843 |
| 1676 | CHIP3550 | STM specil | 1 | 0 | STM4208 |      | putative cytoplasmic pr   |         |
| 1677 | CHIP3566 | STM/STY    | 1 | 1 | STM4235 | plsB | glycerolphc               | STY4431 |
| 1678 | CHIP4166 | STM/STY    | 1 | 1 | STM2912 |      | putative tra              | STY3037 |
| 1679 | CHIP4190 | STM/STY    | 1 | 1 | STM2950 |      | putative mε               | STY3078 |
| 1680 | CHIP3446 | STM specil | 1 | 0 | STM0902 |      | Fels-1 prophage           |         |
| 1681 | CHIP2300 | STM/STY    | 1 | 1 | STM1315 | celD | transcriptio              | STY1798 |
| 1682 | CHIP0241 | STM/STY    | 1 | 1 | STM2466 | eutD | putative ph               | STY2702 |
| 1683 | CHIP2340 | STM/STY    | 1 | 1 | STM1232 | purB | adenylosuc                | STY1272 |
| 1684 | CHIP2364 | STM/STY    | 1 | 1 | STM1432 | ydhO | putative ce               | STY1690 |
| 1685 | CHIP2953 | STM/STY    | 1 | 0 | STM1967 |      | putative 50               | STY2175 |
| 1686 | CHIP2977 | STM/STY    | 1 | 1 | STM2256 | napB | periplasmic               | STY2482 |
| 1687 | CHIP3651 | STM specil | 1 | 0 | STM4424 |      | putative endonuclease     |         |
| 1688 | CHIP3667 | STM/STY    | 1 | 1 | STM4447 |      | putative pe               | STY4786 |
| 1689 | CHIP3011 | STM/STY    | 1 | 1 | STM2321 | nuol | NADH deh                  | STY2551 |
| 1690 | CHIP3027 | STM/STY    | 1 | 1 | STM2348 | yfcF | putataive g               | STY2578 |
| 1691 | CHIP0204 | STM/STY    | 1 | 1 | STM1955 | fliZ | putative re               | STY2163 |
| 1692 | CHIP0228 | STM specil | 1 | 0 | STM0196 | stfC | putative fimbrial outer r |         |
| 1693 | CHIP0198 | STM/STY    | 1 | 1 | STM1927 | yecG | putative un               | STY2136 |
| 1694 | CHIP2297 | STM/STY    | 1 | 1 | STM1307 | astE | succinylglu               | STY1807 |
| 1695 | CHIP2313 | STM/STY    | 1 | 1 | STM1448 | pdxH | pyridoxine                | STY1674 |
| 1696 | CHIP0254 | STM/STY    | 1 | 1 | STM4064 | cdh  | CDP-diacyl                | STY3807 |
| 1697 | CHIP0270 | STM/STY    | 1 | 1 | STM2863 | sitC | Salmonella                | STY2985 |
| 1698 | CHIP2369 | STM/STY    | 1 | 1 | STM1452 | ydgR | putative PC               | STY1670 |
| 1699 | CHIP0256 | STM/STY    | 1 | 0 | STM2513 | shdA | similar to t              | STY2755 |
| 1700 | CHIP2355 | STM/STY    | 1 | 1 | STM1346 | ydiE | putative cyf              | STY1764 |
| 1701 | CHIP2371 | STM/STY    | 1 | 1 | STM1454 | ydgQ | putative N/               | STY1668 |
| 1702 | CHIP0489 | STM/STY    | 1 | 1 | STM1430 | purR | transcriptio              | STY1692 |
| 1703 | CHIP3944 | STM/STY    | 1 | 1 | STM1371 | sufC | putative AE               | STY1752 |
| 1704 | CHIP0537 | STM/STY    | 0 | 0 |         |      | STY2990                   |         |
| 1705 | CHIP3954 | STM/STY    | 1 | 1 | STM1434 | rnt  | RNase T, c                | STY1688 |

|      |          |            |   |   |         |      |                         |         |
|------|----------|------------|---|---|---------|------|-------------------------|---------|
| 1706 | CHIP3978 | STM/STY    | 1 | 1 | STM1482 | ydgF | putative mε             | STY1585 |
| 1707 | CHIP3994 | STM specil | 1 | 0 | STM2088 | rfbX | LPS side chain defect:  |         |
| 1708 | CHIP1326 | STM/STY    | 1 | 1 | STM3800 | dsdC | transcriptio            | STY3979 |
| 1709 | CHIP1438 | STM/STY    | 1 | 1 | STM2647 | ung  | uracil-DNA              | STY2840 |
| 1710 | CHIP1454 | STM/STY    | 1 | 1 | STM0397 | phoB | response rε             | STY0432 |
| 1711 | CHIP1368 | STM/STY    | 1 | 1 | STM0245 | yaeC | putative ou             | STY0272 |
| 1712 | CHIP1384 | STM/STY    | 1 | 1 | STM0100 |      | putative cyf            | STY0117 |
| 1713 | CHIP1400 | STM/STY    | 1 | 1 | STM0070 | caiD | carnitine ra            | STY0080 |
| 1714 | CHIP0486 | STM/STY    | 1 | 1 | STM1950 | sdiA | transcriptio            | STY2158 |
| 1715 | CHIP0502 | STM/STY    | 1 | 1 | STM1683 | tyrR | transcriptio            | STY1378 |
| 1716 | CHIP0542 | STM/STY    | 1 | 1 | STM3563 | livH | ABC super               | STY4249 |
| 1717 | CHIP3983 | STM/STY    | 1 | 1 | STM1490 |      | putative ch             | STY1574 |
| 1718 | CHIP1323 | STM/STY    | 1 | 1 | STM3793 |      | putative su             | STY3989 |
| 1719 | CHIP1443 | STM/STY    | 1 | 1 | STM0357 | mod  | DNA methy               | STY0388 |
| 1720 | CHIP1459 | STM/STY    | 1 | 1 | STM0416 | ribD | bifunctiona             | STY0455 |
| 1721 | CHIP1475 | STM/STY    | 1 | 1 | STM4233 | ubiC | chorismate              | STY4429 |
| 1722 | CHIP1403 | STM/STY    | 1 | 1 | STM0097 | polB | DNA polymr              | STY0112 |
| 1723 | CHIP3201 | STM/STY    | 1 | 1 | STM3239 | yhaO | putative H/             | STY3421 |
| 1724 | CHIP2077 | STM/STY    | 1 | 1 | STM3481 | trpS | tryptophan              | STY4315 |
| 1725 | CHIP0971 | STM/STY    | 1 | 1 | STM0345 |      | putative inr            | STY0378 |
| 1726 | CHIP1542 | STM/STY    | 1 | 1 | STM2442 | cysW | ABC super               | STY2679 |
| 1727 | CHIP1566 | STM/STY    | 1 | 1 | STM0507 | ybbA | putative AE             | STY0553 |
| 1728 | CHIP1598 | STM/STY    | 1 | 1 | STM0605 | ybdN | putative 3'-            | STY0649 |
| 1729 | CHIP3172 | STM/STY    | 1 | 1 | STM2651 | yfiQ | putative ac             | STY2844 |
| 1730 | CHIP3188 | STM/STY    | 1 | 1 | STM3204 | cca  | tRNA nucle              | STY3383 |
| 1731 | CHIP3204 | STM/STY    | 1 | 1 | STM3248 | garR | tartronate ε            | STY3430 |
| 1732 | CHIP3220 | STM/STY    | 1 | 1 | STM3276 | yhbW | putative alk            | STY3459 |
| 1733 | CHIP0974 | STM specil | 1 | 0 | STM1043 |      | Gifsy-2 prophage; attac |         |
| 1734 | CHIP0998 | STM/STY    | 0 | 1 | STM1013 |      | Gifsy-2 pro             | STY1021 |
| 1735 | CHIP1531 | STM/STY    | 1 | 1 | STM2529 |      | putative an             | STY2774 |
| 1736 | CHIP1547 | STM/STY    | 1 | 1 | STM2547 |      | putative hy             | STY2793 |
| 1737 | CHIP1587 | STM/STY    | 1 | 1 | STM0533 | purK | phosphorib              | STY0581 |
| 1738 | CHIP3143 | STM specil | 1 | 0 | STM2599 |      | Gifsy-1 prophage        |         |
| 1739 | CHIP2019 | STM/STY    | 1 | 1 | STM4551 |      | putative diç            | STY4904 |
| 1740 | CHIP2035 | STM/STY    | 1 | 1 | STM3707 | yibD | putative gly            | STY4088 |
| 1741 | CHIP0691 | STM/STY    | 1 | 1 | STM2353 | hisQ | ABC super               | STY2583 |
| 1742 | CHIP0619 | STM/STY    | 1 | 1 | STM0012 | dnaK | chaperone               | STY0012 |
| 1743 | CHIP0635 | STM/STY    | 1 | 1 | STM1723 | trpE | anthranilatε            | STY1328 |
| 1744 | CHIP0667 | STM/STY    | 1 | 1 | STM2809 | proV | ABC super               | STY2934 |
| 1745 | CHIP1814 | STM/STY    | 1 | 1 | STM4051 |      | putative ou             | STY3821 |
| 1746 | CHIP1846 | STM/STY    | 1 | 1 | STM0646 | holA | DNA polymr              | STY0697 |
| 1747 | CHIP0750 | STM/STY    | 1 | 1 | STM2462 | eutJ | paral putati            | STY2699 |
| 1748 | CHIP1801 | STM/STY    | 1 | 1 | STM4125 | oxyR | regulatory              | STY3749 |
| 1749 | CHIP1833 | STM/STY    | 1 | 1 | STM0779 | modE | transcriptio            | STY0812 |
| 1750 | CHIP1865 | STM/STY    | 1 | 1 | STM0770 |      | putative AE             | STY0802 |
| 1751 | CHIP0583 | STM/STY    | 1 | 1 | STM2806 | nrdI | stimulates              | STY2931 |
| 1752 | CHIP0703 | STM/STY    | 1 | 1 | STM1339 | himA | integration             | STY1771 |
| 1753 | CHIP1276 | STM/STY    | 1 | 1 | STM3379 | accB | acetylCoA               | STY3559 |
| 1754 | CHIP1292 | STM/STY    | 1 | 1 | STM0053 |      | putative tra            | STY0062 |
| 1755 | CHIP1308 | STM/STY    | 1 | 1 | STM0036 |      | putative anγ            | STY0043 |
| 1756 | CHIP4689 | STM/STY    | 1 | 0 | STM1245 |      | pseudogen               | STY1880 |
| 1757 | CHIP4713 | STM/STY    | 1 | 1 | STM2010 |      | putative cyf            | STY2212 |

|      |          |         |   |   |         |      |                          |         |
|------|----------|---------|---|---|---------|------|--------------------------|---------|
| 1758 | CHIP0154 | STM/STY | 1 | 1 | STM3868 | atpH | membrane                 | STY3910 |
| 1759 | CHIP0188 | STM/STY | 1 | 1 | STM2049 | pduN | Propanedic               | STY2254 |
| 1760 | CHIP1231 | STM/STY | 1 | 1 | STM4307 |      | putative an              | STY4508 |
| 1761 | CHIP1247 | STM/STY | 1 | 1 | STM1909 | argS | arginine tR              | STY2117 |
| 1762 | CHIP1279 | STM/STY | 1 | 1 | STM3367 | yhcS | putative tra             | STY3547 |
| 1763 | CHIP0468 | STM/STY | 1 | 1 | STM3718 | rfal | UDP-D-gal                | STY4077 |
| 1764 | CHIP0101 | STM/STY | 1 | 1 | STM4329 | mopB | chaperone                | STY4689 |
| 1765 | CHIP0478 | STM/STY | 1 | 1 | STM1141 | csgE | curli produ              | STY1178 |
| 1766 | CHIP0111 | STM/STY | 1 | 1 | STM4025 | yihW | putative gly             | STY3853 |
| 1767 | CHIP0127 | STM/STY | 1 | 1 | STM4170 | hupA | DNA-bindir               | STY3715 |
| 1768 | CHIP4726 | STM/STY | 1 | 1 | STM2434 |      | putative cyI             | STY2671 |
| 1769 | CHIP0183 | STM/STY | 1 | 1 | STM2044 | pduH | Propanedic               | STY2249 |
| 1770 | CHIP1226 | STM/STY | 1 | 1 | STM4296 | adi  | arginine de              | STY4495 |
| 1771 | CHIP0081 | STM/STY | 1 | 1 | STM3898 | yifE | putative Ly              | STY3707 |
| 1772 | CHIP0873 | STM/STY | 1 | 1 | STM1961 | fliS | flagellar bic            | STY2169 |
| 1773 | CHIP0889 | STM/STY | 1 | 1 | STM1713 | cysB | transcriptio             | STY1337 |
| 1774 | CHIP0905 | STM/STY | 1 | 1 | STM4247 | alr  | alanine rac              | STY4443 |
| 1775 | CHIP0921 | STM/STY | 1 | 1 | STM3321 | yhbH | putative sig             | STY3500 |
| 1776 | CHIP0937 | STM/STY | 1 | 1 | STM0429 | phnS | 2-aminoetr               | STY0468 |
| 1777 | CHIP0012 | STM/STY | 1 | 1 | STM3976 | yigW | putative hy              | STY3583 |
| 1778 | CHIP0028 | STM/STY | 1 | 1 | STM3959 | rhtC | RhtB familj              | STY3600 |
| 1779 | CHIP0044 | STM/STY | 1 | 1 | STM3942 |      | putative cyI             | STY3617 |
| 1780 | CHIP1958 | STM/STY | 1 | 1 | STM4443 |      | putative inr             | STY4782 |
| 1781 | CHIP2611 | STM/STY | 1 | 1 | STM0006 | yaaJ | putative AC              | STY0006 |
| 1782 | CHIP0876 | STM/STY | 1 | 1 | STM1182 | flgJ | flagellar bic            | STY1221 |
| 1783 | CHIP0870 | STM/STY | 1 | 1 | STM1969 | fliF | flagellar bic            | STY2177 |
| 1784 | CHIP0886 | STM/STY | 1 | 1 | STM2948 | cysJ | sulfite redu             | STY3076 |
| 1785 | CHIP1737 | STM/STY | 1 | 1 | STM3000 | ppdA | prepilin peç             | STY3138 |
| 1786 | CHIP1761 | STM/STY | 1 | 1 | STM3022 |      | putative tra             | STY3167 |
| 1787 | CHIP1777 | STM/STY | 1 | 1 | STM4089 | menG | putative mç              | STY3781 |
| 1788 | CHIP0015 | STM/STY | 1 | 1 | STM3972 | aarF | putative reç             | STY3587 |
| 1789 | CHIP1196 | STM/STY | 1 | 1 | STM1588 | yncC | putative reç             | STY1477 |
| 1790 | CHIP2752 | STM/STY | 1 | 1 | STM1544 | pqaA | PhoPQ-reç                | STY1518 |
| 1791 | CHIP2768 | STM/STY | 1 | 1 | STM1566 | sfcA | NAD-linkec               | STY1494 |
| 1792 | CHIP2888 | STM/STY | 1 | 1 | STM1812 | ycgM | putative Fu              | STY1942 |
| 1793 | CHIP2904 | STM/STY | 1 | 1 | STM1843 |      | putative tra             | STY1974 |
| 1794 | CHIP2928 | STM/STY | 1 | 1 | STM1887 | yebK | putative tra             | STY2095 |
| 1795 | CHIP2938 | STM/STY | 1 | 1 | STM1902 | yecD | putative isc             | STY2110 |
| 1796 | CHIP4403 | STM/STY | 1 | 1 | STM0506 | tesA | multifunctic             | STY0552 |
| 1797 | CHIP4419 | STM/STY | 1 | 1 | STM0530 | ylbE | putative cyI             | STY0578 |
| 1798 | CHIP4443 | STM/STY | 1 | 0 | STM0577 |      | putative transport prote |         |
| 1799 | CHIP1199 | STM/STY | 1 | 1 | STM1642 | acpD | acyl carrier             | STY1427 |
| 1800 | CHIP2755 | STM/STY | 1 | 1 | STM1548 |      | putative S-              | STY1513 |
| 1801 | CHIP2853 | STM/STY | 1 | 1 | STM1720 | yciO | putative tra             | STY1330 |
| 1802 | CHIP2869 | STM/STY | 1 | 1 | STM1766 | narX | sensory hiç              | STY1286 |
| 1803 | CHIP2885 | STM/STY | 1 | 1 | STM1805 | fadR | negative re              | STY1934 |
| 1804 | CHIP2909 | STM/STY | 1 | 1 | STM1850 | yebU | paral putati             | STY1981 |
| 1805 | CHIP2829 | STM/STY | 1 | 1 | STM1665 |      | putative cyI             | STY1399 |
| 1806 | CHIP4390 | STM/STY | 1 | 1 | STM0481 | priC | primosoma                | STY0525 |
| 1807 | CHIP4288 | STM/STY | 1 | 1 | STM3166 |      | putative ca              | STY3340 |
| 1808 | CHIP4312 | STM/STY | 1 | 1 | STM2690 |      | putative ou              | STY2876 |
| 1809 | CHIP4328 | STM/STY | 1 | 1 | STM4530 | yjiA | putative co              | STY4888 |

|      |          |            |   |   |         |         |                          |         |
|------|----------|------------|---|---|---------|---------|--------------------------|---------|
| 1810 | CHIP4344 | STM/STY    | 1 | 1 | STM0392 | rdgC    | putative ex              | STY0425 |
| 1811 | CHIP4272 | STM/STY    | 1 | 1 | STM3126 |         | putative arr             | STY3295 |
| 1812 | CHIP4576 | STM/STY    | 1 | 1 | STM2567 | yfhD    | putative pe              | STY2813 |
| 1813 | CHIP4594 | STM/STY    | 1 | 1 | STM2784 | tctE    | tricarboxyli             | STY2903 |
| 1814 | CHIP4618 | STM/STY    | 1 | 1 | STM3163 | yqhC    | putative tra             | STY3335 |
| 1815 | CHIP4634 | STM specil | 1 | 0 | STM0840 | ybiV(2) | putative hydrolase of    |         |
| 1816 | CHIP2554 | STM/STY    | 1 | 1 | STM3803 | yidF    | putative cyf             | STY3976 |
| 1817 | CHIP4299 | STM/STY    | 1 | 1 | STM2663 | yfiO    | putative lip             | STY2852 |
| 1818 | CHIP4323 | STM/STY    | 0 | 0 | STM2706 |         | Fels-2 proç              | STY4611 |
| 1819 | CHIP4581 | STM/STY    | 1 | 1 | STM2814 | emrA    | multidrug r              | STY2940 |
| 1820 | CHIP4597 | STM/STY    | 1 | 1 | STM2804 |         | putative cyf             | STY2928 |
| 1821 | CHIP2501 | STM/STY    | 1 | 1 | STM3663 | bax     | gene trans               | STY4135 |
| 1822 | CHIP2525 | STM/STY    | 1 | 1 | STM3724 | kdtA    | 3-deoxy-D-               | STY4070 |
| 1823 | CHIP4198 | STM/STY    | 1 | 1 | STM2971 | sdaB    | L-serine de              | STY3110 |
| 1824 | CHIP4214 | STM/STY    | 1 | 1 | STM2997 | ppdC    | prepilin peç             | STY3135 |
| 1825 | CHIP4520 | STM/STY    | 1 | 1 | STM2187 | yeiA    | putative diI             | STY2418 |
| 1826 | CHIP4536 | STM/STY    | 1 | 1 | STM2223 | yejH    | putative AT              | STY2460 |
| 1827 | CHIP4552 | STM/STY    | 1 | 1 | STM2246 | narP    | response r               | STY2472 |
| 1828 | CHIP1692 | STM/STY    | 1 | 1 | STM1820 | yeaZ    | putative mc              | STY1950 |
| 1829 | CHIP1908 | STM/STY    | 1 | 1 | STM3426 | rpsH    | 30S riboso               | STY4372 |
| 1830 | CHIP1924 | STM/STY    | 1 | 1 | STM0944 | yljA    | putative cyf             | STY0942 |
| 1831 | CHIP1894 | STM/STY    | 1 | 1 | STM0935 | poxB    | pyruvate d               | STY0931 |
| 1832 | CHIP1918 | STM/STY    | 1 | 1 | STM3437 | rplB    | 50S riboso               | STY4361 |
| 1833 | CHIP1934 | STM/STY    | 1 | 1 | STM4345 | yjeM    | putative AF              | STY4705 |
| 1834 | CHIP1950 | STM/STY    | 1 | 1 | STM4391 | rpsF    | 30S riboso               | STY4747 |
| 1835 | CHIP2158 | STM/STY    | 1 | 1 | STM3201 | glnE    | adenylyl tr              | STY3380 |
| 1836 | CHIP2174 | STM/STY    | 1 | 1 | STM3131 |         | putative cyf             | STY3300 |
| 1837 | CHIP1952 | STM/STY    | 1 | 1 | STM4395 | yifZ    | putative pe              | STY4751 |
| 1838 | CHIP1968 | STM/STY    | 1 | 1 | STM4510 |         | putative as              | STY4866 |
| 1839 | CHIP1984 | STM/STY    | 1 | 1 | STM4325 | dcuA    | Dcu family,              | STY4684 |
| 1840 | CHIP4493 | STM/STY    | 1 | 1 | STM0375 | ampH    | penicillin- b            | STY0407 |
| 1841 | CHIP1633 | STM/STY    | 1 | 1 | STM2144 | yegV    | putative su              | STY2373 |
| 1842 | CHIP1649 | STM/STY    | 1 | 1 | STM2219 | yejF    | putative AT              | STY2455 |
| 1843 | CHIP1651 | STM/STY    | 1 | 1 | STM2227 | yejL    | putative cyf             | STY2465 |
| 1844 | CHIP1667 | STM/STY    | 1 | 1 | STM2111 | wcaE    | putative tra             | STY2323 |
| 1845 | CHIP4567 | STM/STY    | 1 | 1 | STM2169 | yohC    | paral putati             | STY2399 |
| 1846 | CHIP2091 | STM/STY    | 1 | 1 | STM3687 | mtlR    | repressor f              | STY4109 |
| 1847 | CHIP2107 | STM/STY    | 1 | 1 | STM3608 | yhjD    | putative tR              | STY4195 |
| 1848 | CHIP2123 | STM/STY    | 1 | 1 | STM3511 | yhgl    | putative Th              | STY4285 |
| 1849 | CHIP2214 | STM/STY    | 1 | 1 | STM3236 | yhaK    | putative cyf             | STY3416 |
| 1850 | CHIP0347 | STM/STY    | 1 | 1 | STM1889 | msbB    | myristoyl tr             | STY2097 |
| 1851 | CHIP0371 | STM/STY    | 1 | 1 | STM1409 | ssaJ    | Secretion s              | STY1711 |
| 1852 | CHIP3330 | STM/STY    | 1 | 1 | STM0720 |         | putative gly             | STY0760 |
| 1853 | CHIP3386 | STM/STY    | 1 | 1 | STM0814 | ybhQ    | putative inr             | STY0849 |
| 1854 | CHIP3418 | STM specil | 1 | 0 | STM0859 |         | putative transcriptional |         |
| 1855 | CHIP2265 | STM/STY    | 1 | 1 | STM1062 | uup     | putative AT              | STY1083 |
| 1856 | CHIP3349 | STM specil | 1 | 0 | STM0761 |         | fumarate hydratase Cl    |         |
| 1857 | CHIP3381 | STM/STY    | 1 | 1 | STM0807 | ybhL    | putative pe              | STY0841 |
| 1858 | CHIP3413 | STM specil | 1 | 0 | STM0854 |         | putative cytoplasmic pr  |         |
| 1859 | CHIP0311 | STM/STY    | 1 | 1 | STM1383 | ttrA    | Tetrathion               | STY1738 |
| 1860 | CHIP2218 | STM/STY    | 1 | 1 | STM3230 | yqjE    | putative inr             | STY3410 |
| 1861 | CHIP3630 | STM/STY    | 1 | 1 | STM4382 | yjfR    | putative Zn              | STY4738 |

|      |          |            |   |   |         |      |                          |
|------|----------|------------|---|---|---------|------|--------------------------|
| 1862 | CHIP0272 | STM specil | 0 | 0 | STM1867 | pagK | PhoPQ-activated gene     |
| 1863 | CHIP0357 | STM/STY    | 1 | 1 | STM1396 | ssaE | Secretion s STY1724      |
| 1864 | CHIP1449 | STM/STY    | 1 | 1 | STM0379 | yaiZ | putative inr STY0411     |
| 1865 | CHIP1491 | STM/STY    | 1 | 1 | STM2390 | yfcZ | putative cyf STY2622     |
| 1866 | CHIP0670 | STM/STY    | 1 | 1 | STM3471 | yhfG | putative cyf STY4325     |
| 1867 | CHIP0816 | STM/STY    | 1 | 1 | STM2022 | cblN | synthesis c STY2225      |
| 1868 | CHIP0935 | STM/STY    | 1 | 1 | STM0431 | phnW | 2-aminoetr STY0470       |
| 1869 | CHIP1951 | STM/STY    | 1 | 1 | STM4393 | rpsR | 30S riboso STY4749       |
| 1870 | CHIP1913 | STM/STY    | 1 | 1 | STM3432 | rpmC | 50S riboso STY4366       |
| 1871 | CHIP1961 | STM/STY    | 1 | 1 | STM4449 |      | putative he STY4788      |
| 1872 | CHIP4481 | STM/STY    | 1 | 1 | STM0349 |      | putative ou STY0383      |
| 1873 | CHIP2251 | STM/STY    | 1 | 1 | STM3095 | gshB | glutathione STY3248      |
| 1874 | CHIP2332 | STM/STY    | 1 | 1 | STM1162 | dinI | DNA dama STY1200         |
| 1875 | CHIP4660 | STM/STY    | 1 | 1 | STM2906 |      | putative cyf STY3029     |
| 1876 | CHIP4645 | STM/STY    | 1 | 0 | STM3806 |      | pseudogene; frameshii    |
| 1877 | CHIP4669 | STM specil | 1 | 0 | STM4214 |      | putative cytoplasmic pr  |
| 1878 | CHIP4646 | STM/STY    | 1 | 1 | STM3463 | yheU | putative cyf STY4334     |
| 1879 | CHIP0098 | STM/STY    | 1 | 1 | STM0448 | clpP | proteolytic STY0490      |
| 1880 | CHIP0173 | STM/STY    | 1 | 1 | STM1243 |      | homology v STY1881       |
| 1881 | CHIP3902 | STM/STY    | 1 | 1 | STM1291 | yeaA | putative do STY1824      |
| 1882 | CHIP3903 | STM/STY    | 1 | 1 | STM1293 | pncA | nicotinamic STY1821      |
| 1883 | CHIP4329 | STM/STY    | 1 | 1 | STM4558 | rimI | modificatio STY4908      |
| 1884 | CHIP2608 | STM/STY    | 1 | 1 | STM3886 | rbsR | transcriptio STY3891     |
| 1885 | CHIP2920 | STM/STY    | 1 | 1 | STM1873 |      | putative pe STY2079      |
| 1886 | CHIP4672 | STM/STY    | 1 | 1 | STM4276 |      | putative cyf STY4474     |
| 1887 | CHIP4688 | STM/STY    | 1 | 1 | STM0727 |      | putative cyf STY0770     |
| 1888 | CHIP4721 | STM/STY    | 1 | 1 | STM2161 |      | putative inr STY2391     |
| 1889 | CHIP4731 | STM/STY    | 1 | 1 | STM2329 |      | putative cyf STY2559     |
| 1890 | CHIP2887 | STM/STY    | 1 | 1 | STM1809 |      | putative cyf STY1938     |
| 1891 | CHIP1072 | STM specil | 1 | 0 | PSLT057 |      | putative cytoplasmic pr  |
| 1892 | CHIP1112 | STM specil | 1 | 0 | PSLT104 | traD | conjugative transfer: D  |
| 1893 | CHIP1081 | STM specil | 1 | 0 | PSLT067 |      | putative cytoplasmic pr  |
| 1894 | CHIP1113 | STM specil | 0 | 0 | PSLT105 | trbH | conjugative transfer     |
| 1895 | CHIP1066 | STM specil | 1 | 0 | PSLT043 |      | putative phosphoribulo   |
| 1896 | CHIP1106 | STM specil | 1 | 0 | PSLT097 | traF | conjugative transfer: as |
| 1897 | CHIP0945 | none       | 0 | 0 | R460028 | stbC |                          |
| 1898 | CHIP1008 | none       | 0 | 0 | R460029 | orfD |                          |
| 1899 | CHIP4896 | none       | 0 | 0 | R460042 | repA |                          |
| 1900 | CHIP4883 | none       | 0 | 0 | R460019 | traF |                          |
| 1901 | CHIP4877 | none       | 0 | 0 | R460012 | traB |                          |
| 1902 | CHIP4904 | none       | 0 | 0 | R460057 |      |                          |
| 1903 | CHIP4802 | STM/STY    | 0 | 0 |         |      |                          |
| 1904 | CHIP4806 | STM/STY    | 1 | 1 | STM0701 | speF | ornithine dε STY0739     |
| 1905 | CHIP4810 | STM specil | 0 | 0 |         |      |                          |
| 1906 | CHIP4814 | STM/STY    | 0 | 0 |         |      |                          |
| 1907 | CHIP4818 | STM specil | 0 | 0 |         |      |                          |
| 1908 | CHIP4822 | STM/STY    | 0 | 0 |         |      |                          |
| 1909 | CHIP5104 | STY specif | 0 | 1 |         |      | STY2044                  |
| 1910 | CHIP5209 | STY specif | 0 | 1 |         |      | STY3292                  |
| 1911 | CHIP5225 | STY specif | 0 | 1 |         |      | STY3661                  |
| 1912 | CHIP5159 | STY specif | 0 | 0 |         |      | STY2420                  |
| 1913 | CHIP5173 | STY specif | 0 | 0 |         |      | STY2884                  |

|      |          |            |   |   |         |             |                        |
|------|----------|------------|---|---|---------|-------------|------------------------|
| 1914 | CHIP4910 | STY specif | 0 | 1 |         |             | STY0114                |
| 1915 | CHIP5129 | STY specif | 0 | 1 |         |             | STY2070                |
| 1916 | CHIP5145 | STM/STY    | 0 | 1 |         |             | STY2345                |
| 1917 | CHIP5161 | STM/STY    | 0 | 0 |         |             |                        |
| 1918 | CHIP5175 | STY specif | 0 | 0 |         |             | STY2886                |
| 1919 | CHIP4912 | STM/STY    | 0 | 1 |         |             | STY0159                |
| 1920 | CHIP4928 | STY specif | 0 | 1 |         |             | STY0313                |
| 1921 | CHIP5139 | STM/STY    | 0 | 1 |         |             | STY2203                |
| 1922 | CHIP5155 | STY specif | 0 | 1 |         |             | STY2361                |
| 1923 | CHIP5169 | STY specif | 0 | 1 |         |             | STY2879                |
| 1924 | CHIP5185 | STY specif | 0 | 1 |         |             | STY3067                |
| 1925 | CHIP5017 | STY specif | 0 | 1 |         |             | STY1592                |
| 1926 | CHIP5033 | STY specif | 0 | 1 |         |             | STY1609                |
| 1927 | CHIP5157 | STY specif | 0 | 1 |         |             | STY2363                |
| 1928 | CHIP5260 | STY specif | 0 | 1 |         |             | STY3762                |
| 1929 | CHIP5275 | STM/STY    | 0 | 0 |         |             |                        |
| 1930 | CHIP5019 | STY specif | 0 | 1 |         |             | STY1594                |
| 1931 | CHIP5035 | STY specif | 0 | 1 |         |             | STY1611                |
| 1932 | CHIP5050 | STY specif | 0 | 1 |         |             | STY1627                |
| 1933 | CHIP5366 | STM/STY    | 0 | 0 |         |             |                        |
| 1934 | CHIP5299 | STY specif | 0 | 1 |         |             | STY4523                |
| 1935 | CHIP5322 | STY specif | 0 | 1 |         |             | STY4558                |
| 1936 | CHIP5336 | STY specif | 0 | 1 |         |             | STY4575                |
| 1937 | CHIP5352 | STY specif | 0 | 1 |         |             | STY4592                |
| 1938 | CHIP5367 | STM/STY    | 1 | 1 | STM2712 | Fels-2 proj | STY4617                |
| 1939 | CHIP5430 | STY specif | 0 | 1 |         |             | STY4852                |
| 1940 | CHIP5370 | STM/STY    | 0 | 0 |         |             |                        |
| 1941 | CHIP5382 | STY specif | 0 | 1 |         |             | STY4650                |
| 1942 | CHIP5319 | STY specif | 0 | 1 |         |             | STY4553                |
| 1943 | CHIP5333 | STY specif | 0 | 1 |         |             | STY4572                |
| 1944 | CHIP5349 | STY specif | 0 | 1 |         |             | STY4589                |
| 1945 | CHIP2696 | STM/STY    | 1 | 1 | STM0180 | panD        | aspartate 1 STY0198    |
| 1946 | CHIP2728 | STM/STY    | 1 | 1 | STM0244 | rceF        | regulator in STY0271   |
| 1947 | CHIP2744 | STM/STY    | 1 | 0 | STM1530 |             | putative ou STY1532    |
| 1948 | CHIP0786 | STM/STY    | 1 | 1 | STM1718 | btuR        | cob(I)alami STY1332    |
| 1949 | CHIP2593 | STM/STY    | 1 | 1 | STM3855 | pstA        | ABC super STY3928      |
| 1950 | CHIP2609 | STM/STY    | 1 | 1 | STM3887 | yieO        | putative Mf STY3889    |
| 1951 | CHIP0796 | STM/STY    | 1 | 1 | STM4580 | nadR        | three acitiv STY4927   |
| 1952 | CHIP0812 | STM/STY    | 1 | 1 | STM2026 | cbiJ        | synthesis c STY2231    |
| 1953 | CHIP0836 | STM/STY    | 1 | 1 | STM3448 | rpsL        | 30S riboso STY4350     |
| 1954 | CHIP0860 | STM/STY    | 1 | 1 | STM2451 | hemF        | coproporpt STY2688     |
| 1955 | CHIP3243 | STM/STY    | 1 | 1 | STM3319 | yhbG        | putative AE STY3498    |
| 1956 | CHIP3259 | STM/STY    | 1 | 1 | STM3358 |             | putative reç STY3538   |
| 1957 | CHIP2669 | STM/STY    | 0 | 0 |         |             | STY0155                |
| 1958 | CHIP2685 | STM/STY    | 1 | 1 | STM0168 | yack        | putative mł STY0190    |
| 1959 | CHIP2701 | STM/STY    | 1 | 1 | STM0187 | sfsA        | regulator fc STY0212   |
| 1960 | CHIP2717 | STM/STY    | 1 | 1 | STM0223 | yaeL        | putative mε STY0246    |
| 1961 | CHIP2733 | STM/STY    | 1 | 1 | STM1507 | ydfJ        | putative tra STY1554   |
| 1962 | CHIP2749 | STM/STY    | 1 | 1 | STM1538 |             | putative hy STY1525    |
| 1963 | CHIP3295 | STM specif | 1 | 0 | STM0656 | ybeS        | putative molecular cha |
| 1964 | CHIP3319 | STM/STY    | 0 | 0 |         |             |                        |
| 1965 | CHIP3712 | STM specif | 1 | 0 | STM4538 |             | putative PTS permeas   |

|      |          |            |   |   |         |       |                          |         |
|------|----------|------------|---|---|---------|-------|--------------------------|---------|
| 1966 | CHIP4024 | STM/STY    | 1 | 1 | STM2138 |       | putative cyf             | STY2366 |
| 1967 | CHIP4040 | STM specil | 1 | 0 | STM2730 |       | Fels-2 prophage: simil   |         |
| 1968 | CHIP4064 | STM specil | 1 | 0 | STM2757 |       | putative cytoplasmic pr  |         |
| 1969 | CHIP3730 | STM/STY    | 1 | 1 | STM4578 | serB  | 3-phospho: STY4925       |         |
| 1970 | CHIP3746 | STM/STY    | 1 | 1 | STM0260 | dniR  | transcriptio             | STY0281 |
| 1971 | CHIP3770 | STM/STY    | 1 | 1 | STM0310 | ghmA  | phosphohe                | STY0355 |
| 1972 | CHIP3786 | STM specil | 1 | 0 | STM0333 |       | putative transcriptional |         |
| 1973 | CHIP3802 | STM/STY    | 1 | 1 | STM1072 | yccR  | putative D†              | STY1094 |
| 1974 | CHIP2378 | STM/STY    | 1 | 1 | STM1492 |       | putative bir             | STY1572 |
| 1975 | CHIP3780 | STM specil | 1 | 0 | STM0327 |       | putative cytoplasmic pr  |         |
| 1976 | CHIP3796 | STM/STY    | 1 | 1 | STM1059 | ycbW  | putative cyf             | STY1080 |
| 1977 | CHIP2372 | STM/STY    | 1 | 1 | STM1455 | ydgP  | putative Ne              | STY1667 |
| 1978 | CHIP3836 | STM/STY    | 1 | 1 | STM1137 | ycdY  | paral putati             | STY1174 |
| 1979 | CHIP3852 | STM/STY    | 1 | 1 | STM1189 | yceF  | putative int†            | STY1228 |
| 1980 | CHIP3868 | STM/STY    | 1 | 0 | STM1215 | ycfS  | putative periplasmic pr  |         |
| 1981 | CHIP2374 | STM/STY    | 1 | 1 | STM1459 |       | putative ox              | STY1663 |
| 1982 | CHIP2390 | STM/STY    | 1 | 1 | STM3424 | rplR  | 50S riboso               | STY4374 |
| 1983 | CHIP2406 | STM/STY    | 1 | 1 | STM3468 | argD  | acetylornit†             | STY4328 |
| 1984 | CHIP2422 | STM/STY    | 1 | 1 | STM3505 | feoA  | ferrous iror             | STY4291 |
| 1985 | CHIP2438 | STM specil | 0 | 0 |         |       |                          |         |
| 1986 | CHIP2454 | STM specil | 1 | 0 | STM3558 |       | homology to death -on-   |         |
| 1987 | CHIP3504 | STM/STY    | 1 | 1 | STM0992 | mukF  | mukF prote               | STY0994 |
| 1988 | CHIP4105 | STM/STY    | 1 | 1 | STM4054 |       | putative dic             | STY3817 |
| 1989 | CHIP4129 | STM/STY    | 1 | 1 | STM4104 |       | putative 5'-             | STY3765 |
| 1990 | CHIP4145 | STM/STY    | 1 | 1 | STM4128 | yijD  | putative inr             | STY3746 |
| 1991 | CHIP4161 | STM/STY    | 1 | 1 | STM2905 |       | putative ac              | STY3027 |
| 1992 | CHIP4185 | STM specil | 1 | 0 | STM2940 |       | putative cytoplasmic pr  |         |
| 1993 | CHIP4139 | STM/STY    | 1 | 1 | STM4117 | yijO  | paral putati             | STY3756 |
| 1994 | CHIP4155 | STM specil | 1 | 0 | STM2865 | avrA  | putative inner membra    |         |
| 1995 | CHIP4171 | STM/STY    | 1 | 1 | STM2920 |       | putative tra             | STY3045 |
| 1996 | CHIP3051 | STM/STY    | 1 | 1 | STM2392 | vacJ  | lipoprotein              | STY2624 |
| 1997 | CHIP3451 | STM specil | 1 | 0 | STM0908 |       | Fels-1 prophage          |         |
| 1998 | CHIP3091 | STM/STY    | 1 | 1 | STM2493 | perM  | putative Pe              | STY2734 |
| 1999 | CHIP3534 | STM/STY    | 1 | 1 | STM4185 | aceK  | isocitrate d             | STY4403 |
| 2000 | CHIP4126 | STM/STY    | 1 | 1 | STM4100 | metB  | cystathionii             | STY3769 |
| 2001 | CHIP4142 | STM/STY    | 1 | 1 | STM4120 | argE  | acetylornit†             | STY3753 |
| 2002 | CHIP4174 | STM/STY    | 1 | 0 | STM2925 | nlpD  | lipoprotein              | STY3050 |
| 2003 | CHIP3046 | STM/STY    | 1 | 1 | STM2381 | yfcM  | putative cyf             | STY2613 |
| 2004 | CHIP3070 | STM/STY    | 1 | 1 | STM2445 | ucpA  | putative ox              | STY2682 |
| 2005 | CHIP0225 | STM/STY    | 0 | 1 | STM2241 | sspH2 | Leucine-ric              | STY2467 |
| 2006 | CHIP2324 | STM/STY    | 1 | 1 | STM1100 | hpaR  | 4-hydroxyp               | STY1132 |
| 2007 | CHIP2348 | STM/STY    | 1 | 1 | STM1301 |       | putative m†              | STY1813 |
| 2008 | CHIP3617 | STM/STY    | 1 | 1 | STM4350 | orn   | oligoribonu              | STY4710 |
| 2009 | CHIP3633 | STM/STY    | 1 | 1 | STM4386 | sgaH  | putative he              | STY4742 |
| 2010 | CHIP3657 | STM specil | 1 | 0 | STM4431 |       | puttive thiamine pyropt  |         |
| 2011 | CHIP2979 | STM/STY    | 1 | 1 | STM2260 | napD  | periplasmic              | STY2486 |
| 2012 | CHIP3675 | STM specil | 1 | 0 | STM4483 | idnO  | 5-keto-D-gluconate-5-r   |         |
| 2013 | CHIP3691 | STM/STY    | 1 | 1 | STM4500 | yjhP  | putative S†              | STY4856 |
| 2014 | CHIP3707 | STM/STY    | 1 | 1 | STM4533 | tsr   | methyl-acc               | STY4892 |
| 2015 | CHIP2287 | STM/STY    | 1 | 0 | STM1221 | cobB  | putative nic             | STY1261 |
| 2016 | CHIP2311 | STM/STY    | 1 | 1 | STM1440 | sodC  | copper/zinc              | STY1682 |
| 2017 | CHIP2281 | STM/STY    | 0 | 0 | STM1148 | ymdC  | putative phospholipase   |         |

|      |          |            |   |   |         |      |                          |         |
|------|----------|------------|---|---|---------|------|--------------------------|---------|
| 2018 | CHIP0222 | STM/STY    | 1 | 1 | STM3442 | hopD | leader pepI              | STY4356 |
| 2019 | CHIP0238 | STM/STY    | 1 | 1 | STM2469 | eutP | putative etI             | STY2705 |
| 2020 | CHIP2337 | STM/STY    | 1 | 1 | STM1223 | potC | ABC super                | STY1263 |
| 2021 | CHIP2353 | STM/STY    | 1 | 1 | STM1326 | pfkB | 6-phosphoI               | STY1785 |
| 2022 | CHIP3622 | STM/STY    | 1 | 1 | STM4370 | yjfl | putative cyI             | STY4727 |
| 2023 | CHIP2339 | STM/STY    | 1 | 1 | STM1226 | potA | ABC super                | STY1266 |
| 2024 | CHIP0280 | STM/STY    | 1 | 1 | STM0021 | bcfA | fimbrial sut             | STY0024 |
| 2025 | CHIP3904 | STM/STY    | 1 | 1 | STM1297 | selD | selenophos               | STY1817 |
| 2026 | CHIP3920 | STM/STY    | 1 | 1 | STM1335 | rpmI | 50S riboso               | STY1776 |
| 2027 | CHIP3952 | STM/STY    | 1 | 1 | STM1429 | ydhB | putative tra             | STY1693 |
| 2028 | CHIP0545 | STM/STY    | 1 | 1 | STM3560 | livF | ABC super                | STY4252 |
| 2029 | CHIP0531 | STM/STY    | 1 | 1 | STM0112 | leuB | 3-isopropyl              | STY0131 |
| 2030 | CHIP0555 | STM/STY    | 1 | 1 | STM0689 | citA | citrate-prot             | STY0727 |
| 2031 | CHIP0571 | STM/STY    | 1 | 1 | STM4231 | lamB | phage lamI               | STY4427 |
| 2032 | CHIP1422 | STM/STY    | 1 | 1 | STM3883 | rbsC | ABC super                | STY3895 |
| 2033 | CHIP1350 | STM/STY    | 1 | 1 | STM0203 | yadQ | putative ClI             | STY0225 |
| 2034 | CHIP1462 | STM/STY    | 1 | 1 | STM0452 | cypD | peptidyl prc             | STY0494 |
| 2035 | CHIP1464 | STM/STY    | 1 | 1 | STM0403 | yajB | putative cyI             | STY0441 |
| 2036 | CHIP1480 | STM/STY    | 1 | 1 | STM4242 |      | putative ou              | STY4438 |
| 2037 | CHIP1496 | STM/STY    | 1 | 1 | STM2372 |      | putative tra             | STY2603 |
| 2038 | CHIP3917 | STM/STY    | 1 | 1 | STM1324 |      | putative cyI             | STY1787 |
| 2039 | CHIP3933 | STM specil | 1 | 0 | STM1355 | ydiP | putative transcription r |         |
| 2040 | CHIP3973 | STM/STY    | 1 | 1 | STM1472 |      | putative pe              | STY1650 |
| 2041 | CHIP3991 | STM/STY    | 1 | 1 | STM2079 | wzzB | regulator o              | STY2288 |
| 2042 | CHIP1419 | STM/STY    | 1 | 1 | STM3851 | yieG | putative xa              | STY3932 |
| 2043 | CHIP1355 | STM/STY    | 1 | 1 | STM0221 | uppS | undecapreI               | STY0244 |
| 2044 | CHIP1371 | STM/STY    | 1 | 1 | STM2060 | yeeA | putative inr             | STY2265 |
| 2045 | CHIP1387 | STM/STY    | 1 | 1 | STM0125 | mraY | phospho-N                | STY0145 |
| 2046 | CHIP1499 | STM/STY    | 1 | 1 | STM2362 | purF | amidophos                | STY2592 |
| 2047 | CHIP2061 | STM/STY    | 1 | 1 | STM3568 | rpoH | sigma H (s               | STY4243 |
| 2048 | CHIP3225 | STM/STY    | 1 | 1 | STM3282 | pnp  | polynucleoI              | STY3463 |
| 2049 | CHIP1526 | STM/STY    | 1 | 1 | STM2554 | hcaT | putative Mf              | STY2801 |
| 2050 | CHIP1003 | STM specil | 0 | 0 | STM1018 |      | Gifsy-2 prophage         |         |
| 2051 | CHIP1035 | STM/STY    | 1 | 1 | STM0226 | lpxD | UDP-3-O-(                | STY0249 |
| 2052 | CHIP3138 | STM specil | 0 | 0 | STM2594 |      | Gifsy-1 prophage: simi   |         |
| 2053 | CHIP2032 | STM/STY    | 1 | 1 | STM3736 |      | putative tra             | STY4058 |
| 2054 | CHIP2048 | STM/STY    | 1 | 1 | STM3627 | dppD | ABC super                | STY4171 |
| 2055 | CHIP2064 | STM/STY    | 1 | 1 | STM3553 | ugpQ | glyceropho               | STY4258 |
| 2056 | CHIP2080 | STM/STY    | 1 | 1 | STM3742 | spoT | bifunctiona              | STY4050 |
| 2057 | CHIP1521 | STM/STY    | 1 | 1 | STM2345 |      | putative tra             | STY2575 |
| 2058 | CHIP1545 | STM/STY    | 1 | 1 | STM2557 | cadC | transcriptio             | STY2804 |
| 2059 | CHIP0992 | STM/STY    | 1 | 1 | STM2438 | yfeK | putative pe              | STY2676 |
| 2060 | CHIP1016 | STM/STY    | 1 | 1 | STM0830 | glnH | ABC super                | STY0868 |
| 2061 | CHIP1595 | STM/STY    | 1 | 1 | STM0583 | ybdK | putative cyI             | STY0626 |
| 2062 | CHIP2003 | STM/STY    | 1 | 1 | STM4465 |      | putative ori             | STY4803 |
| 2063 | CHIP3167 | STM/STY    | 1 | 1 | STM2643 | srmB | ATP-deper                | STY2836 |
| 2064 | CHIP3183 | STM/STY    | 1 | 1 | STM3195 | ribB | 3,4 dihydro              | STY3373 |
| 2065 | CHIP0603 | STM/STY    | 1 | 1 | STM4248 | tyrB | tyrosine an              | STY4444 |
| 2066 | CHIP0715 | STM/STY    | 1 | 1 | STM2549 | asrB | anaerobic ;              | STY2795 |
| 2067 | CHIP0731 | STM/STY    | 1 | 1 | STM2071 | hisG | ATP phosp                | STY2280 |
| 2068 | CHIP0763 | STM/STY    | 1 | 1 | STM0549 | fimZ | fimbrial prc             | STY0596 |
| 2069 | CHIP1822 | STM/STY    | 1 | 1 | STM4026 | yihX | paral putati             | STY3852 |



|      |          |            |   |   |         |      |                         |          |
|------|----------|------------|---|---|---------|------|-------------------------|----------|
| 2070 | CHIP1854 | STM/STY    | 1 | 1 | STM0880 | potI | ABC super               | STY0913  |
| 2071 | CHIP0662 | STM/STY    | 1 | 1 | STM0709 | phrB | deoxyribod              | STY0749  |
| 2072 | CHIP1809 | STM/STY    | 1 | 1 | STM4067 |      | putative AC             | STY3803  |
| 2073 | CHIP1841 | STM/STY    | 1 | 1 | STM0681 | nagD | putative ph             | STY0719  |
| 2074 | CHIP1873 | STM/STY    | 1 | 1 | STM0728 | nei  | endonuclea              | STY0771  |
| 2075 | CHIP0679 | STM/STY    | 1 | 1 | STM4105 | metF | 5,10-methy              | STY3761  |
| 2076 | CHIP0615 | STM/STY    | 1 | 1 | STM4266 | soxR | redox-sens              | STY4464  |
| 2077 | CHIP0449 | STM/STY    | 0 | 0 |         |      |                         |          |
| 2078 | CHIP0465 | STM/STY    | 1 | 1 | STM2556 | hmpA | dihydropter             | STY2803  |
| 2079 | CHIP4673 | STM/STY    | 1 | 1 | STM0155 |      | putative ou             | STY0178  |
| 2080 | CHIP0122 | STM/STY    | 1 | 1 | STM4164 | thiC | 5'-phospho              | STY3721  |
| 2081 | CHIP0138 | STM/STY    | 1 | 1 | STM4023 | yihU | putative ox             | STY3855  |
| 2082 | CHIP4737 | STM specil | 1 | 0 | STM4069 |      | putative periplasmic pr |          |
| 2083 | CHIP0388 | STM/STY    | 1 | 1 | STM2878 | sptP | protein tyrc            | STY3001  |
| 2084 | CHIP0404 | STM/STY    | 1 | 1 | STM1192 | plsX | putative fat            | STY1231  |
| 2085 | CHIP1255 | STM/STY    | 1 | 1 | STM1702 | rnb  | RNase II, n             | STY1350  |
| 2086 | CHIP1287 | STM/STY    | 1 | 1 | STM2662 | rluD | pseudourid              | STY2851  |
| 2087 | CHIP1303 | STM/STY    | 1 | 1 | STM0049 | lytB | regulates tl            | STY0058  |
| 2088 | CHIP4684 | STM/STY    | 1 | 1 | STM1024 |      | Gifsy-2 pro             | STY1038  |
| 2089 | CHIP1313 | STM/STY    | 1 | 1 | STM3775 |      | putative gly            | STY4009  |
| 2090 | CHIP4694 | STM/STY    | 1 | 1 | STM1410 |      | putative cyI            | STY1710  |
| 2091 | CHIP0135 | STM/STY    | 1 | 1 | STM1729 | yciF | putative cyI            | STY1322  |
| 2092 | CHIP4734 | STM specil | 0 | 0 | STM2725 |      | pseudogene; in-frame    |          |
| 2093 | CHIP4357 | STM/STY    | 1 | 1 | STM0420 | pgpA | phosphatid              | STY0459  |
| 2094 | CHIP0399 | STM/STY    | 1 | 1 | STM1659 | ogt  | O-6-alkylgl             | STY1405  |
| 2095 | CHIP2866 | STM/STY    | 1 | 1 | STM1760 |      | putative TF             | STY1292  |
| 2096 | CHIP1708 | STM/STY    | 1 | 1 | STM1825 | yeaB | putative N1             | STY1955  |
| 2097 | CHIP1724 | STM/STY    | 1 | 1 | STM1767 | narL | response r1             | STY1285  |
| 2098 | CHIP1740 | STM/STY    | 1 | 1 | STM2995 | ptr  | protease III            | STY3133  |
| 2099 | CHIP1756 | STM/STY    | 1 | 1 | STM2930 | ispD | 4-phospho               | STY3055  |
| 2100 | CHIP1772 | STM/STY    | 1 | 1 | STM2919 | yglB | putative re             | STY3044  |
| 2101 | CHIP0377 | STM/STY    | 1 | 1 | STM1114 | scsB | Suppressic              | STY1150  |
| 2102 | CHIP0759 | STM/STY    | 1 | 1 | STM0088 | apaH | diadenosin              | STY0103  |
| 2103 | CHIP0052 | STM/STY    | 1 | 1 | STM3930 | yifK | putative AF             | STY3625  |
| 2104 | CHIP0068 | STM/STY    | 1 | 1 | STM3913 | gppA | guanosine               | STY3641  |
| 2105 | CHIP0092 | STM/STY    | 1 | 1 | STM4151 | rplJ | 50S riboso              | STY3734  |
| 2106 | CHIP1711 | STM/STY    | 1 | 1 | STM1815 | minD | cell divisior           | STY1945  |
| 2107 | CHIP1705 | STM/STY    | 1 | 1 | STM1841 |      | putative ou             | STY1971  |
| 2108 | CHIP0894 | STM/STY    | 1 | 1 | STM1920 | cheW | purine-binc             | STY2129  |
| 2109 | CHIP0910 | STM/STY    | 1 | 1 | STM4190 | pepE | (alpha)-as              | STY4407  |
| 2110 | CHIP0934 | STM/STY    | 1 | 1 | STM0432 | phnX | 2-aminoetr              | STY0471  |
| 2111 | CHIP1785 | STM/STY    | 1 | 1 | STM4043 | yiiL | putative cyI            | STY3831  |
| 2112 | CHIP0023 | STM/STY    | 0 | 0 | STM3964 | metR | regulator fc            | STY3595  |
| 2113 | CHIP4464 | STM/STY    | 1 | 0 | STM0610 |      | putative co             | STY0658  |
| 2114 | CHIP2856 | STM/STY    | 1 | 1 | STM1733 |      | putative fer            | STY1318  |
| 2115 | CHIP2776 | STM/STY    | 1 | 1 | STM1577 | narZ | nitrate redt            | STY1488  |
| 2116 | CHIP2792 | STM/STY    | 1 | 1 | STM1609 | tehA | TDT family              | STY1455  |
| 2117 | CHIP2808 | STM/STY    | 1 | 0 | STM1631 | sseJ | Salmonella              | STY1439a |
| 2118 | CHIP2832 | STM/STY    | 1 | 1 | STM1670 |      | putative se             | STY1394  |
| 2119 | CHIP4387 | STM/STY    | 1 | 1 | STM0476 | acrA | acridine eff            | STY0520  |
| 2120 | CHIP1143 | STM/STY    | 1 | 1 | STM1543 |      | putative tra            | STY1519  |
| 2121 | CHIP1159 | STM/STY    | 1 | 1 | STM1527 |      | putative inr            | STY1534  |

|      |          |            |   |   |         |      |                          |         |
|------|----------|------------|---|---|---------|------|--------------------------|---------|
| 2122 | CHIP1183 | STM/STY    | 1 | 1 | STM0979 | ycaL | putative Zn              | STY0979 |
| 2123 | CHIP4467 | STM/STY    | 1 | 1 | STM0615 | ybdR | putative de              | STY0663 |
| 2124 | CHIP2859 | STM/STY    | 1 | 1 | STM1740 | yciU | putative cy              | STY1311 |
| 2125 | CHIP2757 | STM specil | 1 | 0 | STM1550 |      | putative cytoplasmic pr  |         |
| 2126 | CHIP2773 | STM specil | 1 | 0 | STM1571 | yddG | putative permease        |         |
| 2127 | CHIP2789 | STM/STY    | 1 | 1 | STM1604 | ydcP | putative co              | STY1460 |
| 2128 | CHIP2813 | STM/STY    | 0 | 0 |         |      |                          | STY1433 |
| 2129 | CHIP2933 | STM specil | 1 | 0 | STM1896 |      | putative cytoplasmic pr  |         |
| 2130 | CHIP1130 | STM/STY    | 1 | 1 | STM1878 | exoX | DNA exon                 | STY2084 |
| 2131 | CHIP4200 | STM/STY    | 1 | 1 | STM2973 | fucO | L-1,2-prop               | STY3112 |
| 2132 | CHIP4224 | STM/STY    | 1 | 1 | STM3021 |      | putative inr             | STY3166 |
| 2133 | CHIP4240 | STM/STY    | 1 | 1 | STM3062 | serA | D-3-phosph               | STY3218 |
| 2134 | CHIP4256 | STM/STY    | 1 | 1 | STM3093 | endA | DNA-speci                | STY3246 |
| 2135 | CHIP4368 | STM/STY    | 1 | 1 | STM0445 | yajG | putative lip             | STY0487 |
| 2136 | CHIP2464 | STM/STY    | 1 | 1 | STM3581 | yhhS | putative Mf              | STY4230 |
| 2137 | CHIP2482 | STM/STY    | 1 | 1 | STM3618 | yhjN | putative ce              | STY4182 |
| 2138 | CHIP2506 | STM/STY    | 1 | 1 | STM3676 | sgbU | putative 3-I             | STY4120 |
| 2139 | CHIP2522 | STM/STY    | 1 | 1 | STM3704 | pmgI | phosphogly               | STY4091 |
| 2140 | CHIP4195 | STM/STY    | 1 | 1 | STM2961 | ygcY | putative d-ζ             | STY3099 |
| 2141 | CHIP4211 | STM/STY    | 1 | 1 | STM2991 | amiC | N-acetylmt               | STY3129 |
| 2142 | CHIP4235 | STM/STY    | 1 | 1 | STM3040 | lysS | lysine tRN               | STY3196 |
| 2143 | CHIP2469 | STM/STY    | 1 | 1 | STM3588 | yhiN | putative pe              | STY4215 |
| 2144 | CHIP4605 | STM/STY    | 1 | 1 | STM2981 | ygdD | putative srr             | STY3121 |
| 2145 | CHIP4621 | STM/STY    | 1 | 0 | STM4312 |      | putative phage protein   |         |
| 2146 | CHIP2533 | STM specil | 1 | 0 | STM3745 |      | putative cytoplasmic pr  |         |
| 2147 | CHIP4294 | STM/STY    | 1 | 1 | STM3177 | ygiX | putative tra             | STY3354 |
| 2148 | CHIP4222 | STM/STY    | 1 | 1 | STM3016 | araE | MFS family               | STY3160 |
| 2149 | CHIP1644 | STM/STY    | 1 | 1 | STM2214 | spr  | putative lip             | STY2450 |
| 2150 | CHIP1660 | STM/STY    | 1 | 1 | STM2096 | rfdD | TDP-rham                 | STY2306 |
| 2151 | CHIP1676 | STM/STY    | 1 | 1 | STM2158 | yehT | putative re              | STY2388 |
| 2152 | CHIP1892 | STM/STY    | 1 | 1 | STM0940 | ybjX | homologue                | STY0936 |
| 2153 | CHIP2100 | STM/STY    | 1 | 1 | STM3662 | xylR | xylose ope               | STY4136 |
| 2154 | CHIP1932 | STM/STY    | 1 | 1 | STM4317 |      | putative he              | STY4517 |
| 2155 | CHIP2086 | STM/STY    | 1 | 1 | STM3706 | yigQ | putative pe              | STY4089 |
| 2156 | CHIP2110 | STM/STY    | 1 | 1 | STM3596 | yhiR | putative cy              | STY4206 |
| 2157 | CHIP2126 | STM/STY    | 1 | 1 | STM3503 | greB | transcriptio             | STY4293 |
| 2158 | CHIP2142 | STM/STY    | 1 | 1 | STM3295 | folP | 7,8-dihydr               | STY3473 |
| 2159 | CHIP1974 | STM/STY    | 1 | 1 | STM4569 | deoB | phosphope                | STY4920 |
| 2160 | CHIP4483 | STM specil | 1 | 0 | STM0351 |      | putative cation efflux s |         |
| 2161 | CHIP2144 | STM/STY    | 1 | 1 | STM3284 | truB | tRNA pseu                | STY3465 |
| 2162 | CHIP2160 | STM/STY    | 1 | 1 | STM3185 | yqiE | putative re              | STY3363 |
| 2163 | CHIP2176 | STM/STY    | 1 | 1 | STM3107 | yggN | putative pe              | STY3262 |
| 2164 | CHIP1617 | STM/STY    | 1 | 1 | STM2817 | luxS | quorum se                | STY2943 |
| 2165 | CHIP4517 | STM/STY    | 1 | 1 | STM2181 | yohJ | putative eff             | STY2411 |
| 2166 | CHIP4533 | STM/STY    | 1 | 1 | STM2220 | yejG | putative cy              | STY2456 |
| 2167 | CHIP4535 | STM/STY    | 1 | 1 | STM2222 | rsuA | 16S rRNA                 | STY2459 |
| 2168 | CHIP1675 | STM/STY    | 1 | 1 | STM2154 | mrp  | putative AT              | STY2383 |
| 2169 | CHIP4575 | STM/STY    | 1 | 1 | STM2407 | ypeC | putative pe              | STY2648 |
| 2170 | CHIP1907 | STM/STY    | 1 | 1 | STM3425 | rplF | 50S riboso               | STY4373 |
| 2171 | CHIP1923 | STM/STY    | 1 | 1 | STM3472 | ppiA | peptidyl-pr              | STY4324 |
| 2172 | CHIP1939 | STM/STY    | 1 | 1 | STM4363 | hflK | with HflC, f             | STY4720 |
| 2173 | CHIP0331 | STM/STY    | 1 | 1 | STM3762 | cigR | putative inr             | STY4024 |

|      |          |            |   |   |         |       |                          |         |
|------|----------|------------|---|---|---------|-------|--------------------------|---------|
| 2174 | CHIP2238 | STM/STY    | 1 | 1 | STM3157 | yghA  | putative ox              | STY3330 |
| 2175 | CHIP2262 | STM/STY    | 1 | 1 | STM3060 | ygfE  | putative cyf             | STY3216 |
| 2176 | CHIP3362 | STM/STY    | 1 | 1 | STM0782 | modB  | ABC super                | STY0815 |
| 2177 | CHIP3394 | STM/STY    | 1 | 1 | STM0822 | ybiB  | putative tra             | STY0858 |
| 2178 | CHIP0292 | STM/STY    | 1 | 1 | STM2679 | yfjD  | putative mε              | STY2866 |
| 2179 | CHIP0382 | STM/STY    | 1 | 1 | STM2081 | gnd   | gluconate-t              | STY2290 |
| 2180 | CHIP3357 | STM/STY    | 1 | 1 | STM0773 | galM  | galactose-'              | STY0806 |
| 2181 | CHIP3389 | STM/STY    | 1 | 1 | STM0817 | ybhF  | putative AE              | STY0852 |
| 2182 | CHIP3421 | STM/STY    | 1 | 1 | STM0862 | yliJ  | putative glt             | STY0895 |
| 2183 | CHIP2202 | STM/STY    | 1 | 1 | STM3314 | yrbG  | putative Cε              | STY3493 |
| 2184 | CHIP2226 | STM/STY    | 1 | 1 | STM3222 | ygjQ  | putative int             | STY3402 |
| 2185 | CHIP4325 | STM/STY    | 1 | 0 | STM4313 |       | putative cyf             | STY4513 |
| 2186 | CHIP1447 | STM/STY    | 1 | 1 | STM0366 | yahO  | putative pe              | STY0398 |
| 2187 | CHIP1440 | STM/STY    | 1 | 1 | STM2576 | yfhL  | putative fer             | STY2822 |
| 2188 | CHIP0462 | STM specil | 1 | 0 | STM2635 |       | Gifsy-1 prophage: simi   |         |
| 2189 | CHIP0650 | STM/STY    | 1 | 1 | STM4459 | pyrI  | aspartate c              | STY4799 |
| 2190 | CHIP1574 | STM/STY    | 1 | 1 | STM0586 | fes   | enterocheli              | STY0629 |
| 2191 | CHIP1803 | STM/STY    | 1 | 1 | STM4121 | argC  | N-acetyl-gε              | STY3752 |
| 2192 | CHIP1941 | STM/STY    | 1 | 1 | STM4365 | yjeT  | putative inr             | STY4722 |
| 2193 | CHIP0985 | STM/STY    | 1 | 1 | STM1388 | orf70 | putative cyf             | STY1732 |
| 2194 | CHIP1034 | STM/STY    | 1 | 0 | STM3384 | yhdG  | putative TII             | STY3564 |
| 2195 | CHIP3540 | STM specil | 1 | 0 | STM4198 |       | putative cytoplasmic pr  |         |
| 2196 | CHIP3572 | STM/STY    | 1 | 1 | STM4250 | yjbQ  | putative cyf             | STY4446 |
| 2197 | CHIP1205 | STM/STY    | 1 | 1 | STM2736 |       | Fels-2 proφ              | STY4642 |
| 2198 | CHIP4085 | STM/STY    | 1 | 1 | STM2787 |       | tricarboxyli             | STY2907 |
| 2199 | CHIP4094 | STM/STY    | 1 | 1 | STM3995 | yihD  | putative cyf             | STY3885 |
| 2200 | CHIP4160 | STM/STY    | 1 | 1 | STM2904 |       | putative AE              | STY3026 |
| 2201 | CHIP4138 | STM specil | 1 | 0 | STM4116 | frwD  | PTS system fructose-li   |         |
| 2202 | CHIP4180 | STM/STY    | 1 | 1 | STM2932 | ygbE  | putative inr             | STY3057 |
| 2203 | CHIP3965 | STM/STY    | 1 | 1 | STM1461 | ydgT  | putative cyf             | STY1661 |
| 2204 | CHIP3990 | STM/STY    | 1 | 1 | STM1503 | ynfB  | putative pe              | STY1560 |
| 2205 | CHIP0184 | STM/STY    | 1 | 1 | STM2045 | pduJ  | Propanedic               | STY2250 |
| 2206 | CHIP0234 | STM/STY    | 1 | 1 | STM4394 | rplI  | 50S riboso               | STY4750 |
| 2207 | CHIP0220 | STM/STY    | 1 | 1 | STM3444 | bfd   | regulatory r             | STY4354 |
| 2208 | CHIP1335 | STM/STY    | 1 | 1 | STM0307 |       | homology t               | STY0352 |
| 2209 | CHIP2889 | STM/STY    | 1 | 1 | STM1813 | ycgL  | putative cyf             | STY1943 |
| 2210 | CHIP2874 | STM/STY    | 1 | 0 | STM1782 | yehH  | putative inr             | STY1908 |
| 2211 | CHIP2914 | STM/STY    | 1 | 1 | STM1857 |       | putative ac              | STY1991 |
| 2212 | CHIP2924 | STM/STY    | 1 | 1 | STM1881 | yebF  | putative pe              | STY2087 |
| 2213 | CHIP2902 | STM/STY    | 1 | 1 | STM1839 |       | putative pe              | STY1969 |
| 2214 | CHIP4719 | STM/STY    | 1 | 1 | STM2209 |       | putative inr             | STY2445 |
| 2215 | CHIP1080 | STM specil | 0 | 0 |         |       |                          |         |
| 2216 | CHIP1057 | STM specil | 0 | 0 |         |       |                          |         |
| 2217 | CHIP1089 | STM specil | 1 | 0 | PSLT079 | traE  | conjugative transfer: as |         |
| 2218 | CHIP0651 | STM specil | 1 | 0 | PSLT038 | spvC  | Salmonella plasmid vir   |         |
| 2219 | CHIP1074 | STM specil | 0 | 0 |         |       |                          |         |
| 2220 | CHIP1114 | STM specil | 0 | 0 | PSLT106 |       | homologue of mvpA, S     |         |
| 2221 | CHIP0951 | none       | 0 | 0 | R460025 | traK  |                          |         |
| 2222 | CHIP4875 | none       | 0 | 0 | R460010 | traM  |                          |         |
| 2223 | CHIP4902 | none       | 0 | 0 | R460055 | tetA  |                          |         |
| 2224 | CHIP4890 | none       | 0 | 0 | R460035 | orf80 |                          |         |
| 2225 | CHIP4884 | none       | 0 | 0 | R460020 | traG  |                          |         |

|      |          |            |   |   |         |      |                                 |
|------|----------|------------|---|---|---------|------|---------------------------------|
| 2226 | CHIP4871 | none       | 0 | 0 | R460005 | kikA |                                 |
| 2227 | CHIP4803 | STM specif | 0 | 0 |         |      |                                 |
| 2228 | CHIP4807 | STM specif | 1 | 0 | STM2590 |      | Gifsy-1 prophage: simi          |
| 2229 | CHIP4811 | STM/STY    | 0 | 0 |         |      |                                 |
| 2230 | CHIP4815 | STM specif | 0 | 0 |         |      |                                 |
| 2231 | CHIP4819 | STM specif | 0 | 0 | STM1010 |      | Gifsy-2 prophage                |
| 2232 | CHIP4823 | STM/STY    | 0 | 0 |         |      |                                 |
| 2233 | CHIP5197 | STY specif | 0 | 1 |         |      | STY3188                         |
| 2234 | CHIP5127 | STY specif | 0 | 1 |         |      | STY2068                         |
| 2235 | CHIP5143 | STY specif | 0 | 1 |         |      | STY2298                         |
| 2236 | CHIP5247 | STY specif | 0 | 1 |         |      | STY3685                         |
| 2237 | CHIP5262 | STY specif | 0 | 1 |         |      | STY3764                         |
| 2238 | CHIP5005 | STM/STY    | 0 | 1 |         |      | STY1293                         |
| 2239 | CHIP5219 | STM/STY    | 0 | 0 |         |      |                                 |
| 2240 | CHIP5234 | STY specif | 0 | 1 |         |      | STY3671                         |
| 2241 | CHIP5249 | STY specif | 0 | 1 |         |      | STY3687                         |
| 2242 | CHIP5264 | STY specif | 0 | 1 |         |      | STY3845                         |
| 2243 | CHIP5007 | STY specif | 0 | 1 |         |      | STY1360                         |
| 2244 | CHIP5023 | STY specif | 0 | 1 |         |      | STY1598                         |
| 2245 | CHIP5229 | STY specif | 0 | 1 |         |      | STY3665                         |
| 2246 | CHIP5243 | STY specif | 0 | 1 |         |      | STY3681                         |
| 2247 | CHIP5258 | STY specif | 0 | 0 |         |      | STY3703                         |
| 2248 | CHIP4914 | STY specif | 0 | 1 |         |      | STY0202                         |
| 2249 | CHIP4930 | STY specif | 0 | 1 |         |      | STY0322                         |
| 2250 | CHIP4946 | STM/STY    | 0 | 1 |         |      | STY0478                         |
| 2251 | CHIP5245 | STY specif | 0 | 1 |         |      | STY3683                         |
| 2252 | CHIP5179 | STM/STY    | 0 | 1 |         |      | STY2895                         |
| 2253 | CHIP4916 | STY specif | 0 | 1 |         |      | STY0204                         |
| 2254 | CHIP4932 | STY specif | 0 | 1 |         |      | STY0324                         |
| 2255 | CHIP4948 | STY specif | 0 | 1 |         |      | STY0480                         |
| 2256 | CHIP4964 | STY specif | 0 | 1 |         |      | STY1029                         |
| 2257 | CHIP5284 | STY specif | 0 | 1 |         |      | STY4219                         |
| 2258 | CHIP5385 | STY specif | 0 | 1 |         |      | STY4653                         |
| 2259 | CHIP5403 | STY specif | 0 | 1 |         |      | STY4679                         |
| 2260 | CHIP5419 | STY specif | 0 | 1 |         |      | STY4831                         |
| 2261 | CHIP5434 | STM/STY    | 0 | 1 |         |      | STY4875                         |
| 2262 | CHIP5285 | STY specif | 0 | 1 |         |      | STY4220                         |
| 2263 | CHIP5356 | STY specif | 0 | 1 |         |      | STY4596                         |
| 2264 | CHIP5288 | STM/STY    | 0 | 1 |         |      | STY4259                         |
| 2265 | CHIP5304 | STY specif | 0 | 1 |         |      | STY4529                         |
| 2266 | CHIP5400 | STY specif | 0 | 1 |         |      | STY4675                         |
| 2267 | CHIP5416 | STY specif | 0 | 1 |         |      | STY4828                         |
| 2268 | CHIP5431 | STY specif | 0 | 1 |         |      | STY4853                         |
| 2269 | CHIP2704 | STM/STY    | 1 | 1 | STM0190 | mrcB | transpeptid STY0215             |
| 2270 | CHIP3304 | STM/STY    | 1 | 1 | STM0680 | asnB | asparagine STY0718              |
| 2271 | CHIP3320 | STM/STY    | 1 | 1 | STM0702 | kdpE | response r <sub>1</sub> STY0743 |
| 2272 | CHIP2577 | STM/STY    | 1 | 1 | STM3832 |      | putative pe STY3946             |
| 2273 | CHIP0810 | STM/STY    | 1 | 1 | STM2028 | cbiG | synthesis c STY2233             |
| 2274 | CHIP0826 | STM/STY    | 1 | 1 | STM3789 | uhpB | sensory hiε STY3993             |
| 2275 | CHIP2587 | STM specif | 1 | 0 | STM3845 |      | putative inner membra           |
| 2276 | CHIP2603 | STM/STY    | 1 | 1 | STM3877 | asnA | asparagine STY3901              |
| 2277 | CHIP2627 | STM/STY    | 1 | 1 | STM0041 |      | putative gly STY0049            |

|      |          |            |   |   |         |      |                          |         |
|------|----------|------------|---|---|---------|------|--------------------------|---------|
| 2278 | CHIP2659 | STM/STY    | 1 | 1 | STM0116 | ilvI | acetolactat              | STY0135 |
| 2279 | CHIP2675 | STM/STY    | 1 | 1 | STM0149 |      | putative pe              | STY0171 |
| 2280 | CHIP2691 | STM specil | 1 | 0 | STM0175 | stiC | putativie fimbrial       | usher   |
| 2281 | CHIP3245 | STM/STY    | 1 | 1 | STM3328 | arcB | sensory his              | STY3507 |
| 2282 | CHIP3261 | STM/STY    | 1 | 1 | STM3368 | tldD | suppresse                | STY3548 |
| 2283 | CHIP3277 | STM/STY    | 1 | 1 | STM0629 | cspE | RNA chap                 | STY0678 |
| 2284 | CHIP3293 | STM specil | 1 | 0 | STM0654 | ybeQ | putative TPR repeat      | pr      |
| 2285 | CHIP3309 | STM/STY    | 1 | 1 | STM0686 | glnS | glutamine t              | STY0724 |
| 2286 | CHIP3325 | STM/STY    | 1 | 1 | STM0712 | ybgJ | putative ca              | STY0752 |
| 2287 | CHIP2727 | STM/STY    | 1 | 1 | STM0242 | proS | proline tRN              | STY0269 |
| 2288 | CHIP2751 | STM/STY    | 1 | 1 | STM1541 |      | putative re              | STY1521 |
| 2289 | CHIP4008 | STM/STY    | 1 | 1 | STM2113 | wcaC | putative gly             | STY2326 |
| 2290 | CHIP3736 | STM/STY    | 1 | 1 | STM4591 | sthE | putative m               | STY4938 |
| 2291 | CHIP3752 | STM specil | 1 | 0 | STM0278 |      | putative periplasmic     | pr      |
| 2292 | CHIP3776 | STM/STY    | 1 | 1 | STM0321 | proB | gamma-glu                | STY0366 |
| 2293 | CHIP4026 | STM specil | 1 | 0 | STM2707 |      | Fels-2 prophage: simil   |         |
| 2294 | CHIP3754 | STM/STY    | 1 | 0 | STM0283 |      | putative inner membra    |         |
| 2295 | CHIP4066 | STM specil | 1 | 0 | STM2759 |      | putative dipeptide/olig  |         |
| 2296 | CHIP4082 | STM/STY    | 1 | 1 | STM2781 | virK | virulence g              | STY2899 |
| 2297 | CHIP3810 | STM/STY    | 1 | 1 | STM1087 | pipA | Pathogenic               | STY1115 |
| 2298 | CHIP3826 | STM/STY    | 1 | 1 | STM1111 | yccD | putative cy              | STY1147 |
| 2299 | CHIP4076 | STM specil | 0 | 0 | STM2769 |      | putative transposase     |         |
| 2300 | CHIP4092 | STM/STY    | 1 | 1 | STM2798 | ygaP | putative rh              | STY2918 |
| 2301 | CHIP3820 | STM/STY    | 1 | 1 | STM1102 | hpaE | 4-hydroxyp               | STY1136 |
| 2302 | CHIP2396 | STM/STY    | 1 | 1 | STM3453 | fkpA | FKBP-type                | STY4345 |
| 2303 | CHIP2412 | STM/STY    | 1 | 1 | STM3489 | yrfA | putative inr             | STY4307 |
| 2304 | CHIP3876 | STM/STY    | 1 | 1 | STM1236 |      | putative pe              | STY1276 |
| 2305 | CHIP3822 | STM/STY    | 1 | 1 | STM1319 | cedA | cell divisior            | STY1792 |
| 2306 | CHIP3838 | STM/STY    | 1 | 1 | STM1147 |      | putative AC              | STY1184 |
| 2307 | CHIP3854 | STM/STY    | 1 | 1 | STM1197 | fabF | 3-oxoacyl-]              | STY1236 |
| 2308 | CHIP3870 | STM/STY    | 1 | 1 | STM1217 | ycfU | ABC trans                | STY1257 |
| 2309 | CHIP3886 | STM/STY    | 1 | 1 | STM1267 |      | putative cy              | STY1854 |
| 2310 | CHIP2462 | STM/STY    | 1 | 1 | STM3578 | yhhP | small ubiq               | STY4233 |
| 2311 | CHIP3521 | STM specil | 1 | 0 | STM1030 |      | Gifsy-2 prophage         |         |
| 2312 | CHIP3537 | STM specil | 1 | 0 | STM4195 |      | putative Na+-depende     |         |
| 2313 | CHIP3561 | STM/STY    | 1 | 1 | STM4221 | pgi  | glucoseph                | STY4417 |
| 2314 | CHIP3577 | STM/STY    | 1 | 1 | STM4264 | yjcC | putative di              | STY4462 |
| 2315 | CHIP3593 | STM/STY    | 1 | 1 | STM4297 | melR | regulator o              | STY4496 |
| 2316 | CHIP3041 | STM/STY    | 1 | 1 | STM2376 |      | putative pe              | STY2607 |
| 2317 | CHIP3571 | STM/STY    | 1 | 1 | STM4249 | aphA | non-specifi              | STY4445 |
| 2318 | CHIP3587 | STM/STY    | 1 | 1 | STM4284 | yjcO | putative TF              | STY4483 |
| 2319 | CHIP3603 | STM/STY    | 1 | 1 | STM4326 | aspA | aspartate                | STY4685 |
| 2320 | CHIP3435 | STM/STY    | 1 | 1 | STM0890 | artI | ABC super                | STY0923 |
| 2321 | CHIP3459 | STM specil | 1 | 0 | STM0916 |      | Fels-1 prophage; putat   |         |
| 2322 | CHIP3475 | STM/STY    | 1 | 1 | STM0937 | hcp  | hybrid clus              | STY0933 |
| 2323 | CHIP4110 | STM/STY    | 1 | 1 | STM4066 |      | putative su              | STY3804 |
| 2324 | CHIP3558 | STM specil | 1 | 0 | STM4217 |      | putative soluble lytic m |         |
| 2325 | CHIP4158 | STM specil | 1 | 0 | STM2902 |      | putative cytoplasmic     | pr      |
| 2326 | CHIP3606 | STM/STY    | 1 | 1 | STM4332 | yjeJ | putative inr             | STY4692 |
| 2327 | CHIP3430 | STM/STY    | 1 | 1 | STM0878 | potG | ABC super                | STY0911 |
| 2328 | CHIP3454 | STM specil | 0 | 0 |         |      |                          |         |
| 2329 | CHIP0233 | STM/STY    | 1 | 1 | STM0202 | hemL | glutamate-               | STY0223 |

|      |          |            |   |   |         |        |                         |         |
|------|----------|------------|---|---|---------|--------|-------------------------|---------|
| 2330 | CHIP0249 | STM/STY    | 1 | 1 | STM0369 | prpC   | putative cit            | STY0401 |
| 2331 | CHIP2356 | STM/STY    | 1 | 1 | STM1347 | aroH   | 3-deoxy-D-              | STY1763 |
| 2332 | CHIP2945 | STM/STY    | 1 | 1 | STM1935 | ftn    | cytoplasmic             | STY2143 |
| 2333 | CHIP2961 | STM/STY    | 1 | 1 | STM1993 | yedJ   | putative hy             | STY2201 |
| 2334 | CHIP2985 | STM/STY    | 1 | 1 | STM2271 | rcsC   | sensory his             | STY2496 |
| 2335 | CHIP3659 | STM specil | 1 | 0 | STM4433 |        | putative thiamine pyro  |         |
| 2336 | CHIP3003 | STM/STY    | 1 | 1 | STM2310 | menF   | isochorism              | STY2541 |
| 2337 | CHIP3019 | STM/STY    | 1 | 1 | STM2336 |        | putative cyf            | STY2566 |
| 2338 | CHIP0196 | STM/STY    | 1 | 1 | STM2057 | pduW   | Propanedic              | STY2262 |
| 2339 | CHIP0212 | STM/STY    | 1 | 1 | STM2924 | rpoS   | sigma S (si             | STY3049 |
| 2340 | CHIP0236 | STM/STY    | 1 | 1 | STM0206 | btuF   | putative co             | STY0228 |
| 2341 | CHIP0206 | STM specil | 1 | 0 | STM2636 |        | Gifsy-1 prophage: simi  |         |
| 2342 | CHIP2305 | STM/STY    | 1 | 1 | STM1340 | btuC   | ABC super               | STY1770 |
| 2343 | CHIP2321 | STM/STY    | 1 | 1 | STM1076 | mgsA   | methylglyo:             | STY1098 |
| 2344 | CHIP0262 | STM/STY    | 1 | 1 | STM2867 | hilC   | bacterial re            | STY2988 |
| 2345 | CHIP0278 | STM/STY    | 1 | 1 | STM4094 | cytR   | transcriptio            | STY3776 |
| 2346 | CHIP2950 | STM/STY    | 1 | 1 | STM1945 | pgsA   | phosphatid              | STY2153 |
| 2347 | CHIP0264 | STM/STY    | 1 | 1 | STM2898 | invG   | invasion pr             | STY3021 |
| 2348 | CHIP2363 | STM/STY    | 1 | 1 | STM1431 | sodB   | superoxide              | STY1691 |
| 2349 | CHIP0481 | STM/STY    | 1 | 1 | STM1144 | csgA   | curlin majo             | STY1181 |
| 2350 | CHIP0497 | STM/STY    | 1 | 1 | STM3726 | mutM   | formamido               | STY4068 |
| 2351 | CHIP0529 | STM/STY    | 1 | 1 | STM3716 | rfaY   | lipopolysac             | STY4079 |
| 2352 | CHIP3976 | STM/STY    | 1 | 1 | STM1478 | ydgH   | putative pe             | STY1590 |
| 2353 | CHIP3970 | STM/STY    | 1 | 1 | STM1468 | fumA   | fumarase /              | STY1654 |
| 2354 | CHIP3986 | STM/STY    | 1 | 1 | STM1498 |        | putative dir            | STY1566 |
| 2355 | CHIP1318 | STM/STY    | 1 | 1 | STM3781 |        | putative su             | STY4001 |
| 2356 | CHIP1334 | STM/STY    | 1 | 1 | STM0308 | yafV   | putative an             | STY0353 |
| 2357 | CHIP1446 | STM/STY    | 1 | 1 | STM0363 |        | putative tra            | STY0395 |
| 2358 | CHIP1374 | STM/STY    | 1 | 1 | STM2013 | yeeO   | putative M/             | STY2216 |
| 2359 | CHIP1376 | STM/STY    | 1 | 1 | STM2067 | sbcB   | exonucleaε              | STY2276 |
| 2360 | CHIP1392 | STM/STY    | 1 | 1 | STM0133 | ftsZ   | tubulin-like            | STY0153 |
| 2361 | CHIP1504 | STM/STY    | 1 | 1 | STM2323 | nuoG   | NADH deh                | STY2553 |
| 2362 | CHIP0494 | STM/STY    | 1 | 1 | STM0317 | gpt    | guanine-hy              | STY0362 |
| 2363 | CHIP0510 | STM/STY    | 1 | 1 | STM1980 | fliQ   | flagellar bic           | STY2188 |
| 2364 | CHIP3981 | STM/STY    | 1 | 1 | STM1487 | ynfL   | putative tra            | STY1578 |
| 2365 | CHIP0568 | STM/STY    | 1 | 1 | STM3447 | rpsG   | 30S riboso              | STY4351 |
| 2366 | CHIP1427 | STM/STY    | 1 | 1 | STM3847 | yidY   | putative Mf             | STY3936 |
| 2367 | CHIP1451 | STM/STY    | 1 | 1 | STM0387 | yail   | putative cyf            | STY0420 |
| 2368 | CHIP1467 | STM/STY    | 1 | 1 | STM0441 | cyoC   | cytochromε              | STY0483 |
| 2369 | CHIP1483 | STM/STY    | 1 | 1 | STM4269 | yjcE   | putative CF             | STY4467 |
| 2370 | CHIP1507 | STM/STY    | 1 | 1 | STM2312 | elaA   | putative ac             | STY2543 |
| 2371 | CHIP3209 | STM/STY    | 1 | 1 | STM3258 |        | Sugar spec              | STY3441 |
| 2372 | CHIP0963 | STM/STY    | 1 | 0 | STM4156 |        | putative cytoplasmic pr |         |
| 2373 | CHIP0987 | STM/STY    | 1 | 1 | STM1381 | orf245 | putative cyf            | STY1741 |
| 2374 | CHIP1550 | STM/STY    | 1 | 1 | STM2512 | xseA   | exonucleaε              | STY2753 |
| 2375 | CHIP1582 | STM/STY    | 1 | 1 | STM0500 | ybbJ   | putative Mε             | STY0546 |
| 2376 | CHIP1998 | STM/STY    | 1 | 1 | STM4413 |        | putative im             | STY4772 |
| 2377 | CHIP3180 | STM/STY    | 1 | 1 | STM3190 | ygiE   | putative div            | STY3368 |
| 2378 | CHIP3196 | STM/STY    | 1 | 1 | STM3220 | ygiO   | paral putati            | STY3400 |
| 2379 | CHIP3212 | STM/STY    | 1 | 1 | STM3265 | yraN   | putative en             | STY3448 |
| 2380 | CHIP3228 | STM specil | 1 | 0 | STM3291 |        | putative cytoplasmic pr |         |
| 2381 | CHIP0982 | STM/STY    | 1 | 1 | STM1773 | yhcA   | putative tra            | STY1898 |

|      |          |            |   |   |         |                 |                           |         |
|------|----------|------------|---|---|---------|-----------------|---------------------------|---------|
| 2382 | CHIP1006 | STM/STY    | 1 | 1 | STM2300 | putative cyI    | STY2530                   |         |
| 2383 | CHIP1539 | STM/STY    | 1 | 1 | STM2447 | putative ou     | STY2684                   |         |
| 2384 | CHIP1024 | STM/STY    | 1 | 1 | STM4471 | miaE hydroxylas | STY4809                   |         |
| 2385 | CHIP1603 | STM/STY    | 1 | 1 | STM2794 | ygaE            | putative tra              | STY2914 |
| 2386 | CHIP2011 | STM/STY    | 1 | 1 | STM4512 | iadA            | isoaspartyl               | STY4868 |
| 2387 | CHIP2027 | STM/STY    | 1 | 1 | STM4595 |                 | putative firr             | STY4944 |
| 2388 | CHIP2043 | STM/STY    | 1 | 0 | STM3656 | glyQ            | glycine tRNA synthetas    |         |
| 2389 | CHIP0611 | STM/STY    | 1 | 1 | STM1753 | hnr             | Response                  | STY1297 |
| 2390 | CHIP0627 | STM/STY    | 1 | 1 | STM1693 | sapB            | ABC super                 | STY1368 |
| 2391 | CHIP0643 | STM/STY    | 1 | 1 | STM4048 | rhaS            | positive reç              | STY3825 |
| 2392 | CHIP1798 | STM/STY    | 1 | 1 | STM3998 | yihG            | putative en               | STY3882 |
| 2393 | CHIP1830 | STM/STY    | 1 | 1 | STM0813 | ybhP            | putative cyI              | STY0848 |
| 2394 | CHIP1862 | STM/STY    | 1 | 1 | STM0797 | bioD            | dethiobiotin              | STY0830 |
| 2395 | CHIP0758 | STM/STY    | 1 | 1 | STM0089 | apaG            | putative cyI              | STY0104 |
| 2396 | CHIP1817 | STM/STY    | 1 | 1 | STM4040 | yiiG            | putative cyI              | STY3836 |
| 2397 | CHIP1849 | STM/STY    | 1 | 1 | STM0641 | ybeA            | putative cyI              | STY0692 |
| 2398 | CHIP1881 | STM/STY    | 1 | 1 | STM0261 | gloB            | hydroxyacy                | STY0282 |
| 2399 | CHIP0591 | STM/STY    | 1 | 1 | STM0978 | aroA            | 3-enolpyru                | STY0978 |
| 2400 | CHIP0711 | STM/STY    | 1 | 1 | STM2355 | argT            | ABC super                 | STY2585 |
| 2401 | CHIP1284 | STM/STY    | 1 | 1 | STM2685 | smpA            | small mem                 | STY2871 |
| 2402 | CHIP1300 | STM/STY    | 1 | 1 | STM0059 | citD2           | putative cit              | STY0068 |
| 2403 | CHIP4681 | STM/STY    | 1 | 1 | STM0362 |                 | putative cyI              | STY0394 |
| 2404 | CHIP4705 | STM/STY    | 1 | 1 | STM1854 |                 | putative inr              | STY1986 |
| 2405 | CHIP0146 | STM/STY    | 1 | 1 | STM3594 | prlC            | oligopeptid               | STY4209 |
| 2406 | CHIP3323 | STM/STY    | 0 | 0 |         |                 |                           |         |
| 2407 | CHIP1223 | STM/STY    | 1 | 1 | STM4303 | dcuR            | response r                | STY4501 |
| 2408 | CHIP1239 | STM/STY    | 0 | 0 |         |                 |                           | STY2144 |
| 2409 | CHIP1263 | STM/STY    | 1 | 1 | STM1684 | ycjF            | putative inr              | STY1377 |
| 2410 | CHIP0460 | STM/STY    | 1 | 1 | STM2637 | rseC            | regulator o               | STY2830 |
| 2411 | CHIP0476 | STM/STY    | 1 | 1 | STM1139 | csgG            | putative tra              | STY1176 |
| 2412 | CHIP0109 | STM/STY    | 1 | 1 | STM2958 | barA            | sensory his               | STY3096 |
| 2413 | CHIP4678 | STM/STY    | 0 | 0 | STM0324 |                 | putative inner membra     |         |
| 2414 | CHIP0119 | STM specil | 1 | 0 | STM4161 |                 | putative involved in thic |         |
| 2415 | CHIP4718 | STM/STY    | 1 | 1 | STM3460 |                 | pseudogen                 | STY4338 |
| 2416 | CHIP3231 | STM/STY    | 1 | 1 | STM3297 | ftsJ            | 23S rRNA                  | STY3475 |
| 2417 | CHIP0191 | STM/STY    | 1 | 1 | STM2052 | pduQ            | Propanedic                | STY2257 |
| 2418 | CHIP1234 | STM/STY    | 1 | 1 | STM4279 | nrfC            | putative nit              | STY4477 |
| 2419 | CHIP0865 | STM/STY    | 1 | 1 | STM1975 | fliL            | flagellar bic             | STY2183 |
| 2420 | CHIP0881 | STM/STY    | 1 | 1 | STM1512 | dcp             | dipeptidyl c              | STY1549 |
| 2421 | CHIP0897 | STM/STY    | 1 | 1 | STM4130 | btuB            | outer mem                 | STY3744 |
| 2422 | CHIP0913 | STM/STY    | 1 | 1 | STM0609 | ahpF            | alkyl hydroj              | STY0655 |
| 2423 | CHIP0929 | STM/STY    | 1 | 1 | STM1744 | oppC            | ABC super                 | STY1306 |
| 2424 | CHIP1780 | STM/STY    | 1 | 1 | STM4072 | ydeV            | putative su               | STY3798 |
| 2425 | CHIP0020 | STM/STY    | 1 | 1 | STM3967 | dlhH            | putative diç              | STY3592 |
| 2426 | CHIP0036 | STM/STY    | 1 | 1 | STM3951 | uvrD            | DNA-deper                 | STY3608 |
| 2427 | CHIP1382 | STM/STY    | 1 | 1 | STM0085 | yabF            | putative N/               | STY0100 |
| 2428 | CHIP2182 | STM/STY    | 1 | 1 | STM3059 | ygfB            | putative cyI              | STY3215 |
| 2429 | CHIP0868 | STM/STY    | 1 | 1 | STM1971 | fliH            | flagellar bic             | STY2179 |
| 2430 | CHIP0884 | STM/STY    | 1 | 1 | STM2430 | cysK            | subunit of ç              | STY2666 |
| 2431 | CHIP0878 | STM/STY    | 1 | 1 | STM2432 | ptsl            | General P1                | STY2668 |
| 2432 | CHIP1729 | STM/STY    | 1 | 1 | STM1717 | yciK            | putative ox               | STY1333 |
| 2433 | CHIP1753 | STM/STY    | 1 | 1 | STM2951 | ygcF            | putative Or               | STY3080 |

|      |          |            |   |   |         |      |                        |         |
|------|----------|------------|---|---|---------|------|------------------------|---------|
| 2434 | CHIP1769 | STM/STY    | 1 | 1 | STM2949 | ptpS | putative sy            | STY3077 |
| 2435 | CHIP1793 | STM/STY    | 1 | 1 | STM4013 |      | putative m             | STY3866 |
| 2436 | CHIP0550 | STM/STY    | 1 | 1 | STM1912 | flhE | flagellar pr           | STY2121 |
| 2437 | CHIP1204 | STM/STY    | 1 | 1 | STM1656 |      | putative Zn            | STY1409 |
| 2438 | CHIP2760 | STM/STY    | 1 | 0 | STM1554 |      | putative co            | STY1509 |
| 2439 | CHIP2880 | STM/STY    | 1 | 0 | STM1795 |      | putative ho            | STY1922 |
| 2440 | CHIP2896 | STM/STY    | 1 | 1 | STM1830 | manX | Sugar Spe              | STY1959 |
| 2441 | CHIP2912 | STM/STY    | 1 | 1 | STM1853 | prpA | serine/thre            | STY1984 |
| 2442 | CHIP2936 | STM/STY    | 1 | 1 | STM1900 | ntpA | dATP pyro              | STY2108 |
| 2443 | CHIP1127 | STM/STY    | 1 | 1 | STM0888 | artM | ABC super              | STY0921 |
| 2444 | CHIP4411 | STM/STY    | 1 | 1 | STM0520 |      | putative pe            | STY0568 |
| 2445 | CHIP1167 | STM/STY    | 1 | 1 | STM0998 | aspC | aspartate              | STY1000 |
| 2446 | CHIP4451 | STM/STY    | 1 | 1 | STM0589 | fepE | ferric enter           | STY0632 |
| 2447 | CHIP4475 | STM/STY    | 1 | 1 | STM0338 | stbC | putative fir           | STY0371 |
| 2448 | CHIP2763 | STM/STY    | 1 | 1 | STM1557 |      | putative an            | STY1507 |
| 2449 | CHIP2861 | STM/STY    | 1 | 1 | STM1746 | oppA | ABC super              | STY1304 |
| 2450 | CHIP2877 | STM/STY    | 1 | 1 | STM1786 |      | hydrogena              | STY1913 |
| 2451 | CHIP2893 | STM/STY    | 1 | 1 | STM1827 |      | putative di            | STY1957 |
| 2452 | CHIP2821 | STM/STY    | 1 | 1 | STM1651 | nifJ | putative py            | STY1419 |
| 2453 | CHIP2837 | STM/STY    | 1 | 1 | STM1678 |      | putative 2'            | STY1385 |
| 2454 | CHIP4398 | STM/STY    | 1 | 1 | STM0497 |      | putative pe            | STY0543 |
| 2455 | CHIP4208 | STM/STY    | 1 | 1 | STM2984 | csdA | putative se            | STY3124 |
| 2456 | CHIP4320 | STM specil | 0 | 0 |         |      |                        |         |
| 2457 | CHIP4336 | STM/STY    | 1 | 1 | STM0270 |      | putative cy            | STY0291 |
| 2458 | CHIP4352 | STM/STY    | 1 | 1 | STM0408 | secF | preprotein             | STY0446 |
| 2459 | CHIP4280 | STM/STY    | 1 | 1 | STM3148 | hybB | putative cy            | STY3319 |
| 2460 | CHIP4584 | STM/STY    | 1 | 1 | STM2830 | ygaD | putative cy            | STY2951 |
| 2461 | CHIP2490 | STM/STY    | 1 | 1 | STM3633 |      | putative ba            | STY4164 |
| 2462 | CHIP4626 | STM specil | 1 | 0 | STM4540 |      | putative glucosamine-f |         |
| 2463 | CHIP2530 | STM/STY    | 1 | 1 | STM3737 |      | putative Zn            | STY4057 |
| 2464 | CHIP4291 | STM specil | 1 | 0 | STM3170 |      | putative inner membra  |         |
| 2465 | CHIP4219 | STM/STY    | 1 | 1 | STM3009 | ygeD | putative eff           | STY3152 |
| 2466 | CHIP4243 | STM/STY    | 1 | 1 | STM3076 | tktA | transketola            | STY3236 |
| 2467 | CHIP4589 | STM/STY    | 1 | 1 | STM2845 | hycl | protease in            | STY2967 |
| 2468 | CHIP2493 | STM/STY    | 1 | 1 | STM3647 | yiaF | putative ou            | STY4155 |
| 2469 | CHIP2509 | STM/STY    | 1 | 1 | STM3680 | aldB | aldehyde d             | STY4116 |
| 2470 | CHIP2541 | STM/STY    | 1 | 1 | STM3768 |      | putative se            | STY4017 |
| 2471 | CHIP4206 | STM/STY    | 1 | 1 | STM2979 | fucR | positive re            | STY3119 |
| 2472 | CHIP4230 | STM/STY    | 1 | 0 | STM3029 | stdA | putative fir           | STY3177 |
| 2473 | CHIP4528 | STM/STY    | 1 | 1 | STM2200 | lysP | APC family             | STY2435 |
| 2474 | CHIP4544 | STM specil | 1 | 0 | STM2235 |      | putative phage protein |         |
| 2475 | CHIP1684 | STM/STY    | 1 | 1 | STM2208 |      | putative inr           | STY2444 |
| 2476 | CHIP2084 | STM/STY    | 1 | 1 | STM3731 | dut  | deoxyuridir            | STY4063 |
| 2477 | CHIP1916 | STM/STY    | 1 | 1 | STM3435 | rplV | 50S riboso             | STY4363 |
| 2478 | CHIP1940 | STM/STY    | 1 | 1 | STM4364 | hflC | with HflK, r           | STY4721 |
| 2479 | CHIP1902 | STM/STY    | 1 | 1 | STM3414 | rplQ | 50S riboso             | STY4384 |
| 2480 | CHIP1926 | STM/STY    | 1 | 1 | STM0941 | ybjY | paral putati           | STY0937 |
| 2481 | CHIP1942 | STM/STY    | 1 | 1 | STM4366 | purA | adenylosuc             | STY4723 |
| 2482 | CHIP2150 | STM/STY    | 1 | 1 | STM3247 | garK | glycerate k            | STY3429 |
| 2483 | CHIP2166 | STM/STY    | 1 | 1 | STM3149 | hybA | function un            | STY3320 |
| 2484 | CHIP1607 | STM/STY    | 1 | 1 | STM2833 | srlE | PTS family             | STY2954 |
| 2485 | CHIP1960 | STM/STY    | 1 | 1 | STM4446 |      | putative se            | STY4785 |



|      |          |            |   |   |         |        |                         |          |
|------|----------|------------|---|---|---------|--------|-------------------------|----------|
| 2486 | CHIP1976 | STM/STY    | 1 | 1 | STM4579 | radA   | putative AT             | STY4926  |
| 2487 | CHIP4485 | STM specil | 1 | 0 | STM0353 |        | putative cation transpo |          |
| 2488 | CHIP1625 | STM/STY    | 1 | 1 | STM2844 |        | putative pe             | STY2966  |
| 2489 | CHIP1641 | STM/STY    | 1 | 1 | STM2207 | setB   | proton efflu            | STY2443  |
| 2490 | CHIP1657 | STM/STY    | 1 | 1 | STM2090 | rfbH   | LPS side c              | STY2300  |
| 2491 | CHIP1659 | STM/STY    | 1 | 1 | STM2092 | rfbF   | LPS side c              | STY2302  |
| 2492 | CHIP4559 | STM/STY    | 1 | 1 | STM2152 | stcA   | paral putati            | STY2381  |
| 2493 | CHIP1699 | STM/STY    | 1 | 1 | STM1765 | narK   | MFS super               | STY1287  |
| 2494 | CHIP2099 | STM/STY    | 1 | 1 | STM3668 | yiaK   | putative m              | STY4130  |
| 2495 | CHIP2115 | STM/STY    | 1 | 1 | STM3575 | yhhN   | putative inr            | STY4236  |
| 2496 | CHIP2131 | STM/STY    | 1 | 1 | STM3336 | nanK   | putative M              | STY3516  |
| 2497 | CHIP2222 | STM/STY    | 1 | 1 | STM3226 | yqjA   | putative D              | STY3406  |
| 2498 | CHIP0363 | STM/STY    | 1 | 1 | STM1402 | sseE   | Secretion               | STY1718  |
| 2499 | CHIP0379 | STM/STY    | 1 | 1 | STM1116 | scsD   | Suppressic              | STY1152  |
| 2500 | CHIP3370 | STM/STY    | 1 | 1 | STM0791 | hutH   | histidine ar            | STY0824  |
| 2501 | CHIP3402 | STM/STY    | 1 | 1 | STM0837 | ybiS   | putative pe             | STY0878  |
| 2502 | CHIP2183 | STM/STY    | 1 | 1 | STM3057 | ubiH   | 2-octapren              | STY3213  |
| 2503 | CHIP2273 | STM/STY    | 1 | 1 | STM1103 | hpaD   | 4-hydroxyp              | STY1137  |
| 2504 | CHIP3365 | STM/STY    | 1 | 1 | STM0787 | hutI   | Imidazolon              | STY0820  |
| 2505 | CHIP3397 | STM/STY    | 1 | 1 | STM0827 | ybiO   | paral putati            | STY0865  |
| 2506 | CHIP0303 | STM/STY    | 1 | 1 | STM1601 | ugtL   | putative m              | STY1463  |
| 2507 | CHIP2210 | STM/STY    | 1 | 1 | STM3256 |        | putative ph             | STY3438  |
| 2508 | CHIP2234 | STM/STY    | 1 | 1 | STM3187 | ygiB   | putative inr            | STY3365  |
| 2509 | CHIP0237 | STM/STY    | 1 | 1 | STM2470 | eutS   | putative ca             | STY2706  |
| 2510 | CHIP0314 | STM/STY    | 1 | 1 | STM2304 | pmrD   | polymyxin               | STY2534  |
| 2511 | CHIP1417 | STM/STY    | 1 | 1 | STM3862 | glmU   | N-acetyl gl             | STY3916  |
| 2512 | CHIP1466 | STM/STY    | 1 | 1 | STM0424 | xseB   | exonuclea               | STY0463  |
| 2513 | CHIP0582 | STM/STY    | 1 | 1 | STM2805 | nrdH   | glutaredoxi             | STY2930  |
| 2514 | CHIP4373 | STM/STY    | 1 | 1 | STM0454 | ybaW   | putative es             | STY0496  |
| 2515 | CHIP0917 | STM specil | 0 | 0 | STM3353 | oadG-1 | putative sodium ion pu  |          |
| 2516 | CHIP1910 | STM/STY    | 1 | 1 | STM3429 | rplX   | 50S riboso              | STY4369  |
| 2517 | CHIP1912 | STM/STY    | 1 | 1 | STM3431 | rpsQ   | 30S riboso              | STY4367  |
| 2518 | CHIP1953 | STM/STY    | 1 | 1 | STM4402 | ytfH   | putative tra            | STY4760  |
| 2519 | CHIP4560 | STM/STY    | 1 | 1 | STM2153 | yehE   | putative ou             | STY2382  |
| 2520 | CHIP4507 | STM/STY    | 1 | 1 | STM1930 |        | pseudogen               | STY2139  |
| 2521 | CHIP2267 | STM/STY    | 1 | 1 | STM1065 | ymbA   | putative ou             | STY1086  |
| 2522 | CHIP4652 | STM/STY    | 1 | 1 | STM2653 | yfiM   | putative ou             | STY2846  |
| 2523 | CHIP4637 | STM/STY    | 1 | 1 | STM1443 | ydhI   | putative inr            | STY1679  |
| 2524 | CHIP4653 | STM/STY    | 1 | 0 | STM2664 |        | pseudogene; two in-fra  |          |
| 2525 | CHIP4598 | STM/STY    | 1 | 1 | STM4096 | rpmE   | 50S riboso              | STY3774  |
| 2526 | CHIP4662 | STM/STY    | 1 | 1 | STM4302 |        | putative cy             | STY4500a |
| 2527 | CHIP0099 | STM/STY    | 1 | 1 | STM0449 | clpX   | specificity             | STY0491  |
| 2528 | CHIP0134 | STM/STY    | 1 | 1 | STM1728 | yciG   | putative cy             | STY1323  |
| 2529 | CHIP3887 | STM/STY    | 1 | 1 | STM1272 | yoaG   | putative cy             | STY1849  |
| 2530 | CHIP4321 | STM/STY    | 1 | 0 | STM2704 |        | Fels-2 prophage: simil  |          |
| 2531 | CHIP1366 | STM/STY    | 1 | 1 | STM0237 | rof    | modulator               | STY0262  |
| 2532 | CHIP2616 | STM/STY    | 1 | 1 | STM0017 |        | putative pr             | STY0017  |
| 2533 | CHIP2563 | STM/STY    | 0 | 0 |         |        |                         | STY2477  |
| 2534 | CHIP4680 | STM/STY    | 1 | 1 | STM0359 |        | putative cy             | STY0391  |
| 2535 | CHIP4696 | STM/STY    | 1 | 1 | STM1093 |        | putative cy             | STY1125  |
| 2536 | CHIP4715 | STM/STY    | 1 | 1 | STM3566 |        | putative cy             | STY4246  |
| 2537 | CHIP2910 | STM/STY    | 1 | 1 | STM1851 |        | putative cy             | STY1982  |

|      |          |            |   |   |         |      |                          |
|------|----------|------------|---|---|---------|------|--------------------------|
| 2538 | CHIP2895 | STM/STY    | 1 | 0 | STM1829 |      | putative cytoplasmic pr  |
| 2539 | CHIP1096 | STM specif | 1 | 0 | PSLT087 |      | conjugative transfer:    |
| 2540 | CHIP1065 | STM specif | 1 | 0 | PSLT036 |      | putative transposase, I  |
| 2541 | CHIP1097 | STM specif | 1 | 0 | PSLT088 | traC | conjugative transfer: as |
| 2542 | CHIP0659 | STM specif | 1 | 0 | PSLT039 | spvB | Salmonella plasmid vir   |
| 2543 | CHIP1090 | STM specif | 1 | 0 | PSLT081 | traB | conjugative transfer: as |
| 2544 | CHIP0604 | STM specif | 1 | 0 | PSLT018 | pefA | plasmid-encoded fimbr    |
| 2545 | CHIP0953 | none       | 0 | 0 | R460024 | traJ |                          |
| 2546 | CHIP4882 | none       | 0 | 0 | R460018 | traO |                          |
| 2547 | CHIP4908 | none       | 0 | 0 | R460063 | rec  |                          |
| 2548 | CHIP4903 | none       | 0 | 0 | R460056 |      |                          |
| 2549 | CHIP4891 | none       | 0 | 0 | R460036 | ardR |                          |
| 2550 | CHIP4878 | none       | 0 | 0 | R460013 | traC |                          |
| 2551 | CHIP4804 | STM specif | 0 | 0 |         |      |                          |
| 2552 | CHIP4808 | STM/STY    | 1 | 1 | STM0710 | ybgH | putative PC STY0750      |
| 2553 | CHIP4812 | STM/STY    | 0 | 0 |         |      |                          |
| 2554 | CHIP4816 | STM/STY    | 1 | 1 | STM0848 | yliA | putative AT STY0887      |
| 2555 | CHIP4820 | STM specif | 0 | 0 |         |      |                          |
| 2556 | CHIP4824 | STM/STY    | 0 | 0 |         |      |                          |
| 2557 | CHIP5111 | STY specif | 0 | 1 |         |      | STY2052                  |
| 2558 | CHIP5217 | STM/STY    | 0 | 1 |         |      | STY3614                  |
| 2559 | CHIP5151 | STY specif | 0 | 1 |         |      | STY2355                  |
| 2560 | CHIP5167 | STM/STY    | 0 | 1 |         |      | STY2756                  |
| 2561 | CHIP5181 | STM/STY    | 0 | 1 |         |      | STY3006                  |
| 2562 | CHIP4918 | STY specif | 0 | 1 |         |      | STY0206                  |
| 2563 | CHIP5137 | STY specif | 0 | 1 |         |      | STY2104                  |
| 2564 | CHIP5153 | STY specif | 0 | 1 |         |      | STY2357                  |
| 2565 | CHIP5168 | STM/STY    | 0 | 0 |         |      |                          |
| 2566 | CHIP5183 | STY specif | 0 | 1 |         |      | STY3065                  |
| 2567 | CHIP4920 | STY specif | 0 | 1 |         |      | STY0295                  |
| 2568 | CHIP4936 | STY specif | 0 | 1 |         |      | STY0332                  |
| 2569 | CHIP5147 | STY specif | 0 | 1 |         |      | STY2350                  |
| 2570 | CHIP5163 | STY specif | 0 | 1 |         |      | STY2731                  |
| 2571 | CHIP5177 | STY specif | 0 | 0 |         |      | STY2888                  |
| 2572 | CHIP5009 | STY specif | 0 | 1 |         |      | STY1364                  |
| 2573 | CHIP5025 | STY specif | 0 | 1 |         |      | STY1600                  |
| 2574 | CHIP5041 | STY specif | 0 | 1 |         |      | STY1617                  |
| 2575 | CHIP5165 | STY specif | 0 | 1 |         |      | STY2749                  |
| 2576 | CHIP5268 | STM/STY    | 0 | 1 |         |      | STY3924                  |
| 2577 | CHIP5011 | STY specif | 0 | 1 |         |      | STY1413                  |
| 2578 | CHIP5027 | STY specif | 0 | 1 |         |      | STY1602                  |
| 2579 | CHIP5043 | STY specif | 0 | 1 |         |      | STY1619                  |
| 2580 | CHIP5058 | STY specif | 0 | 1 |         |      | STY1636                  |
| 2581 | CHIP5373 | STY specif | 0 | 1 |         |      | STY4630                  |
| 2582 | CHIP5307 | STY specif | 0 | 1 |         |      | STY4535                  |
| 2583 | CHIP5328 | STY specif | 0 | 1 |         |      | STY4566                  |
| 2584 | CHIP5344 | STY specif | 0 | 1 |         |      | STY4584                  |
| 2585 | CHIP5360 | STM/STY    | 0 | 1 |         |      | STY4601                  |
| 2586 | CHIP5292 | STY specif | 0 | 1 |         |      | STY4413                  |
| 2587 | CHIP5363 | STM/STY    | 0 | 1 |         |      | STY4610                  |
| 2588 | CHIP5377 | STY specif | 0 | 1 |         |      | STY4637                  |
| 2589 | CHIP5312 | STY specif | 0 | 1 |         |      | STY4544                  |

|      |          |            |   |   |         |                               |
|------|----------|------------|---|---|---------|-------------------------------|
| 2590 | CHIP5325 | STY specif | 0 | 1 |         | STY4563                       |
| 2591 | CHIP5341 | STY specif | 0 | 1 |         | STY4580                       |
| 2592 | CHIP5357 | STY specif | 0 | 1 |         | STY4597                       |
| 2593 | CHIP0834 | STM/STY    | 1 | 1 | STM1071 | sulA suppressor STY1092       |
| 2594 | CHIP0858 | STM/STY    | 1 | 1 | STM4227 | malG ABC super STY4423        |
| 2595 | CHIP2673 | STM/STY    | 1 | 1 | STM0142 | hofC putative co STY0164      |
| 2596 | CHIP2689 | STM/STY    | 1 | 1 | STM0173 | yadH putative AE STY0195      |
| 2597 | CHIP2705 | STM/STY    | 1 | 1 | STM0192 | fhuC ABC super STY0219        |
| 2598 | CHIP2729 | STM/STY    | 1 | 1 | STM0246 | yaeE putative AE STY0273      |
| 2599 | CHIP3267 | STM/STY    | 1 | 1 | STM3375 | yhdA putative diç STY3555     |
| 2600 | CHIP3291 | STM/STY    | 1 | 1 | STM0652 | putative siç STY0703          |
| 2601 | CHIP3307 | STM/STY    | 1 | 1 | STM0684 | nagB glucosamir STY0722       |
| 2602 | CHIP0773 | STM specif | 1 | 0 | STM3639 | lpfB long polar fimbrial chaç |
| 2603 | CHIP2580 | STM/STY    | 1 | 1 | STM3839 | rpmH 50S riboso STY3939A      |
| 2604 | CHIP2596 | STM/STY    | 1 | 1 | STM3858 | putative ph STY3925           |
| 2605 | CHIP0775 | STM specif | 1 | 0 | STM3637 | lpfD long polar fimbrial oper |
| 2606 | CHIP2590 | STM/STY    | 1 | 1 | STM3850 | yieF putative ox STY3933      |
| 2607 | CHIP2606 | STM/STY    | 1 | 1 | STM3884 | rbsB ABC super STY3894        |
| 2608 | CHIP0839 | STM/STY    | 1 | 1 | STM3713 | rfaL O-antigen I STY4082      |
| 2609 | CHIP0855 | STM/STY    | 1 | 1 | STM0225 | hlpA histone-like STY0248     |
| 2610 | CHIP2662 | STM/STY    | 1 | 1 | STM0121 | ftsL cell divisior STY0141    |
| 2611 | CHIP4072 | STM specif | 1 | 0 | STM2765 | putative transposase          |
| 2612 | CHIP4088 | STM/STY    | 1 | 1 | STM2790 | ygaF paral putati STY2910     |
| 2613 | CHIP2376 | STM/STY    | 1 | 1 | STM1484 | putative prç STY1583          |
| 2614 | CHIP2392 | STM/STY    | 1 | 1 | STM3439 | rpID 50S riboso STY4359       |
| 2615 | CHIP2408 | STM/STY    | 1 | 1 | STM3480 | yhfL putative ou STY4316      |
| 2616 | CHIP2424 | STM/STY    | 1 | 1 | STM3508 | putative cyI STY4288          |
| 2617 | CHIP2386 | STM/STY    | 1 | 0 | STM3411 | putative cytoplasmic pr       |
| 2618 | CHIP2402 | STM/STY    | 1 | 0 | STM3462 | yheT putative hy STY4335      |
| 2619 | CHIP2418 | STM/STY    | 1 | 1 | STM3498 | yrfI heat shock STY4298       |
| 2620 | CHIP3882 | STM/STY    | 1 | 1 | STM1254 | putative ou STY1867           |
| 2621 | CHIP3898 | STM/STY    | 1 | 1 | STM1287 | arylsulfataç STY1829          |
| 2622 | CHIP4011 | STM/STY    | 1 | 1 | STM2118 | wza putative po STY2331       |
| 2623 | CHIP2436 | STM specif | 1 | 0 | STM3528 | putative periplasmic pr       |
| 2624 | CHIP2452 | STM/STY    | 1 | 1 | STM3554 | ugpC ABC super STY4257        |
| 2625 | CHIP4013 | STM/STY    | 1 | 1 | STM2120 | asmA suppressor STY2333       |
| 2626 | CHIP4029 | STM/STY    | 1 | 1 | STM2711 | Fels-2 proç STY4616           |
| 2627 | CHIP3757 | STM/STY    | 1 | 1 | STM0286 | putative cyI STY0310          |
| 2628 | CHIP3773 | STM/STY    | 1 | 1 | STM0313 | dinP DNA polymr STY0358       |
| 2629 | CHIP4007 | STM/STY    | 1 | 1 | STM2112 | wcaD putative co STY2324      |
| 2630 | CHIP4023 | STM/STY    | 1 | 0 | STM2137 | putative cytoplasmic pr       |
| 2631 | CHIP4047 | STM specif | 1 | 0 | STM2740 | Fels-2 prophage: similç       |
| 2632 | CHIP4063 | STM specif | 1 | 0 | STM2756 | putative sugar phosphç        |
| 2633 | CHIP3791 | STM specif | 1 | 0 | STM1048 | Gifsy-2 prophage; host        |
| 2634 | CHIP3807 | STM/STY    | 1 | 1 | STM1082 | bacterial re STY1106          |
| 2635 | CHIP3425 | STM/STY    | 1 | 1 | STM0869 | paral putati STY0902          |
| 2636 | CHIP3441 | STM specif | 1 | 0 | STM0897 | Fels-1 prophage               |
| 2637 | CHIP3457 | STM specif | 1 | 0 | STM0914 | Fels-1 prophage; putat        |
| 2638 | CHIP3473 | STM/STY    | 1 | 1 | STM0932 | putative nu STY0928           |
| 2639 | CHIP3113 | STM/STY    | 1 | 1 | STM2543 | nifS putative an STY2789      |
| 2640 | CHIP3129 | STM specif | 1 | 0 | STM2585 | Gifsy-1 prophage: simi        |
| 2641 | CHIP3099 | STM/STY    | 1 | 1 | STM2511 | guaB IMP dehydç STY2752       |

|      |          |            |   |   |         |      |                          |         |
|------|----------|------------|---|---|---------|------|--------------------------|---------|
| 2642 | CHIP3499 | STM/STY    | 1 | 1 | STM0986 | ycaQ | putative cy              | STY0987 |
| 2643 | CHIP3524 | STM specil | 1 | 0 | STM1033 |      | Gifsy-2 prophage; rese   |         |
| 2644 | CHIP3556 | STM specil | 1 | 0 | STM4215 |      | putative cytoplasmic pr  |         |
| 2645 | CHIP4148 | STM/STY    | 1 | 1 | STM2851 | hycC | hydrogena                | STY2973 |
| 2646 | CHIP4172 | STM/STY    | 1 | 1 | STM2922 |      | putative 3- $\gamma$     | STY3047 |
| 2647 | CHIP3078 | STM/STY    | 1 | 1 | STM2474 | tkkB | transketola              | STY2711 |
| 2648 | CHIP3478 | STM/STY    | 1 | 1 | STM0945 | clpA | ATP-bindin               | STY0943 |
| 2649 | CHIP3502 | STM/STY    | 1 | 1 | STM0989 |      | mukF prote               | STY0991 |
| 2650 | CHIP3527 | STM specil | 1 | 0 | STM1036 |      | Gifsy-2 prophage; prot   |         |
| 2651 | CHIP3543 | STM specil | 1 | 0 | STM4201 |      | putative phage tail prot |         |
| 2652 | CHIP3567 | STM/STY    | 1 | 1 | STM4243 | yjbN | putative TII             | STY4439 |
| 2653 | CHIP3665 | STM/STY    | 1 | 1 | STM4442 |      | putative cy              | STY4781 |
| 2654 | CHIP3009 | STM/STY    | 1 | 1 | STM2318 | nuoL | NADH deh                 | STY2548 |
| 2655 | CHIP3025 | STM/STY    | 1 | 1 | STM2344 |      | putative ph              | STY2574 |
| 2656 | CHIP2277 | STM/STY    | 1 | 1 | STM1117 | agp  | glucose-1- $\gamma$      | STY1153 |
| 2657 | CHIP0218 | STM/STY    | 1 | 1 | STM1259 |      | putative AT              | STY1861 |
| 2658 | CHIP2325 | STM/STY    | 1 | 1 | STM1112 | cbpA | curved DN                | STY1148 |
| 2659 | CHIP2319 | STM/STY    | 1 | 1 | STM1067 | fabA | beta-hydro               | STY1088 |
| 2660 | CHIP0260 | STM/STY    | 1 | 1 | STM2516 | sinI | putative ou              | STY2761 |
| 2661 | CHIP0284 | STM/STY    | 1 | 1 | STM0026 | bcfF | fimbrial sut             | STY0031 |
| 2662 | CHIP2956 | STM/STY    | 1 | 0 | STM1987 |      | putative inr             | STY2194 |
| 2663 | CHIP2972 | STM/STY    | 1 | 1 | STM2066 | sopA | Secreted e               | STY2275 |
| 2664 | CHIP2988 | STM/STY    | 1 | 0 | STM2275 |      | putative re              | STY2504 |
| 2665 | CHIP2958 | STM/STY    | 1 | 1 | STM1989 | yedI | putative inr             | STY2196 |
| 2666 | CHIP2974 | STM/STY    | 1 | 1 | STM2069 | yeeY | putative tra             | STY2278 |
| 2667 | CHIP2990 | STM/STY    | 1 | 1 | STM2280 |      | putative pe              | STY2509 |
| 2668 | CHIP3006 | STM/STY    | 1 | 1 | STM2314 |      | putative ch              | STY2545 |
| 2669 | CHIP3030 | STM/STY    | 1 | 1 | STM2358 |      | putative cy              | STY2588 |
| 2670 | CHIP2282 | STM/STY    | 1 | 0 | STM1187 | rluC | 23S rRNA                 | STY1227 |
| 2671 | CHIP0553 | STM/STY    | 1 | 1 | STM1174 | flgB | flagellar bic            | STY1213 |
| 2672 | CHIP0569 | STM/STY    | 1 | 1 | STM3446 | fusA | protein cha              | STY4352 |
| 2673 | CHIP1332 | STM/STY    | 1 | 1 | STM0340 | stbA | putative fir             | STY0373 |
| 2674 | CHIP1348 | STM/STY    | 1 | 1 | STM0162 |      | putative inr             | STY0184 |
| 2675 | CHIP1468 | STM/STY    | 1 | 1 | STM0442 | cyoB | cytochrom                | STY0484 |
| 2676 | CHIP1484 | STM/STY    | 1 | 1 | STM4272 |      | putative inr             | STY4470 |
| 2677 | CHIP1470 | STM/STY    | 1 | 1 | STM4182 | metA | homoserin                | STY4400 |
| 2678 | CHIP1406 | STM/STY    | 1 | 1 | STM0139 | yacF | putative cy              | STY0161 |
| 2679 | CHIP0492 | STM/STY    | 1 | 1 | STM2301 | pqaB | putative m               | STY2531 |
| 2680 | CHIP3939 | STM specil | 1 | 0 | STM1361 | ydiM | putative MFS family tra  |         |
| 2681 | CHIP3955 | STM/STY    | 1 | 1 | STM1436 | nemA | N-ethylmal               | STY1686 |
| 2682 | CHIP0556 | STM/STY    | 1 | 1 | STM0399 | brnQ | LIVCS fam                | STY0435 |
| 2683 | CHIP0558 | STM/STY    | 0 | 0 |         |      |                          | STY1709 |
| 2684 | CHIP0574 | STM/STY    | 1 | 1 | STM4228 | malF | ABC super                | STY4424 |
| 2685 | CHIP1337 | STM/STY    | 1 | 1 | STM0322 | proA | gamma-glu                | STY0367 |
| 2686 | CHIP1361 | STM/STY    | 1 | 1 | STM0166 | speE | spermidine               | STY0188 |
| 2687 | CHIP1377 | STM/STY    | 1 | 1 | STM2001 | yeel | putative inr             | STY2208 |
| 2688 | CHIP1489 | STM/STY    | 1 | 1 | STM2403 | glk  | glucokinas               | STY2644 |
| 2689 | CHIP1508 | STM/STY    | 1 | 1 | STM2307 | menB | dihydroxyn               | STY2537 |
| 2690 | CHIP1524 | STM/STY    | 1 | 1 | STM2295 | yfaO | putative N1              | STY2525 |
| 2691 | CHIP1548 | STM/STY    | 1 | 1 | STM2546 | suhB | inositol mo              | STY2792 |
| 2692 | CHIP1025 | STM/STY    | 1 | 1 | STM4472 | ytgA | putative inr             | STY4811 |
| 2693 | CHIP1588 | STM/STY    | 1 | 1 | STM0535 | lpxH | UDP-2,3-di               | STY0583 |

|      |          |            |   |   |               |                               |
|------|----------|------------|---|---|---------------|-------------------------------|
| 2694 | CHIP3136 | STM specil | 1 | 0 | STM2592       | Gifsy-1 prophage: simi        |
| 2695 | CHIP3146 | STM specil | 1 | 0 | STM2602       | Gifsy-1 prophage: simi        |
| 2696 | CHIP2022 | STM/STY    | 1 | 1 | STM4566 yjjI  | putative cyf STY4917          |
| 2697 | CHIP2038 | STM/STY    | 1 | 1 | STM3700 gpsA  | glycerol-3- $\phi$ STY4095    |
| 2698 | CHIP2054 | STM/STY    | 1 | 1 | STM3610 yhjG  | putative inr STY4193          |
| 2699 | CHIP2070 | STM/STY    | 1 | 1 | STM3514 malP  | maltodextrin STY4282          |
| 2700 | CHIP1519 | STM/STY    | 1 | 1 | STM2406       | putative ox STY2647           |
| 2701 | CHIP1553 | STM/STY    | 1 | 1 | STM2483 dapE  | N-succinyl- STY2721           |
| 2702 | CHIP1030 | STM/STY    | 1 | 1 | STM0959 lrp   | regulator fc STY0957          |
| 2703 | CHIP1593 | STM/STY    | 1 | 1 | STM0569 ybdG  | putative tra STY0618          |
| 2704 | CHIP2001 | STM/STY    | 1 | 1 | STM4437 yjgA  | putative cyf STY4776          |
| 2705 | CHIP2017 | STM/STY    | 0 | 0 |               | STY4897                       |
| 2706 | CHIP2033 | STM/STY    | 1 | 1 | STM3734 rph   | RNase PH STY4060              |
| 2707 | CHIP3191 | STM/STY    | 1 | 1 | STM3212 mug   | DNA glyco: STY3391            |
| 2708 | CHIP3207 | STM/STY    | 1 | 1 | STM3255       | putative ph STY3437           |
| 2709 | CHIP2083 | STM/STY    | 1 | 1 | STM3735 yicC  | putative str STY4059          |
| 2710 | CHIP0689 | STM/STY    | 1 | 0 | STM4524 hsdS  | specificity determinant       |
| 2711 | CHIP0705 | STM/STY    | 1 | 1 | STM0117 ilvH  | acetolactat STY0136           |
| 2712 | CHIP0633 | STM/STY    | 1 | 1 | STM2888 spaR  | surface pre STY3011           |
| 2713 | CHIP1870 | STM/STY    | 1 | 1 | STM0736 sucA  | 2-oxogluta STY0779            |
| 2714 | CHIP0676 | STM/STY    | 1 | 1 | STM4299 melB  | GPH family STY4498            |
| 2715 | CHIP0700 | STM/STY    | 1 | 1 | STM2675 rimM  | 16S rRNA STY2862              |
| 2716 | CHIP0716 | STM/STY    | 1 | 1 | STM2550 asrC  | anaerobic : STY2796           |
| 2717 | CHIP0732 | STM/STY    | 1 | 1 | STM2072 hisD  | histidinal d: STY2281         |
| 2718 | CHIP0668 | STM/STY    | 1 | 1 | STM0320 phoE  | outer mem STY0365             |
| 2719 | CHIP0623 | STM/STY    | 1 | 1 | STM0494 ushA  | UDP-sugar STY0539             |
| 2720 | CHIP0639 | STM/STY    | 1 | 1 | STM1058 pyrD  | dihydro-orc STY1079           |
| 2721 | CHIP0663 | STM/STY    | 1 | 1 | STM4319 phoN  | non-specific STY4519          |
| 2722 | CHIP1810 | STM/STY    | 1 | 1 | STM4063 sbp   | ABC super STY3808             |
| 2723 | CHIP1842 | STM/STY    | 1 | 1 | STM0668 ybeY  | putative m $\epsilon$ STY0714 |
| 2724 | CHIP1874 | STM/STY    | 1 | 1 | STM0723       | putative AE STY0764           |
| 2725 | CHIP0178 | STM/STY    | 1 | 1 | STM2039 pudB  | Propanedic STY2244            |
| 2726 | CHIP1221 | STM/STY    | 1 | 1 | STM4309       | putative pe STY4510           |
| 2727 | CHIP1237 | STM/STY    | 1 | 1 | STM1951 yecC  | putative AE STY2159           |
| 2728 | CHIP1261 | STM/STY    | 1 | 1 | STM1677       | putative tra STY1386          |
| 2729 | CHIP0450 | STM/STY    | 0 | 0 |               |                               |
| 2730 | CHIP1301 | STM/STY    | 1 | 1 | STM0058 citC2 | putative cit STY0067          |
| 2731 | CHIP4692 | STM/STY    | 1 | 0 | STM1268       | putative cytoplasmic pr       |
| 2732 | CHIP0133 | STM/STY    | 1 | 1 | STM4176 purH  | bifunctiona STY3709           |
| 2733 | CHIP0149 | STM/STY    | 1 | 1 | STM2536 pepB  | putative anr STY2782          |
| 2734 | CHIP0181 | STM/STY    | 1 | 1 | STM2042 pduE  | Propanedic STY2247            |
| 2735 | CHIP1224 | STM/STY    | 1 | 1 | STM4301 dcuB  | Dcu family, STY4500           |
| 2736 | CHIP1240 | STM/STY    | 1 | 1 | STM1931 araH  | putative int STY2140          |
| 2737 | CHIP0407 | STM/STY    | 1 | 1 | STM1195 fabG  | 3-oxoacyl-[ STY1234           |
| 2738 | CHIP1258 | STM/STY    | 1 | 1 | STM1664       | putative tra STY1400          |
| 2739 | CHIP1282 | STM/STY    | 1 | 1 | STM2667 pheA  | bifunctional: STY2854         |
| 2740 | CHIP1298 | STM/STY    | 1 | 1 | STM0005 yaaA  | putative cyf STY0005          |
| 2741 | CHIP1314 | STM/STY    | 1 | 1 | STM3794       | putative re $\phi$ STY3988    |
| 2742 | CHIP4695 | STM/STY    | 1 | 1 | STM1474       | pseudogen STY1648             |
| 2743 | CHIP1788 | STM/STY    | 1 | 1 | STM4037 fdoG  | formate de STY3839            |
| 2744 | CHIP0018 | STM/STY    | 1 | 1 | STM3969 yigN  | putative inr STY3590          |
| 2745 | CHIP0050 | STM/STY    | 1 | 1 | STM3936 hemX  | uroporphyr STY3623            |

|      |          |            |   |   |         |      |                         |
|------|----------|------------|---|---|---------|------|-------------------------|
| 2746 | CHIP2178 | STM/STY    | 1 | 1 | STM3068 | fba  | fructose-bi: STY3226    |
| 2747 | CHIP0866 | STM/STY    | 1 | 1 | STM1976 | fliM | flagellar bic STY2184   |
| 2748 | CHIP0882 | STM/STY    | 0 | 0 |         |      | STY2665                 |
| 2749 | CHIP1719 | STM/STY    | 1 | 1 | STM1789 |      | putative hy STY1916     |
| 2750 | CHIP0908 | STM/STY    | 1 | 1 | STM3287 | nusA | transcriptio STY3468    |
| 2751 | CHIP1767 | STM/STY    | 1 | 1 | STM2970 | sdaC | putative H/ STY3109     |
| 2752 | CHIP1783 | STM/STY    | 1 | 1 | STM4052 |      | putative C4 STY3820     |
| 2753 | CHIP0013 | STM/STY    | 1 | 1 | STM3975 | tatC | part of sec STY3584     |
| 2754 | CHIP0029 | STM/STY    | 1 | 1 | STM3958 | recQ | ATP-deper STY3601       |
| 2755 | CHIP0031 | STM/STY    | 1 | 1 | STM3956 | yigl | putative prc STY3603    |
| 2756 | CHIP1563 | STM/STY    | 1 | 1 | STM0489 | hemH | ferrochelate STY0533    |
| 2757 | CHIP0087 | STM/STY    | 0 | 0 | STM4146 | tufB | protein cha STY3739     |
| 2758 | CHIP0871 | STM/STY    | 1 | 1 | STM1970 | fliG | flagellar bic STY2178   |
| 2759 | CHIP0887 | STM/STY    | 1 | 1 | STM2947 | cysI | sulfite redu STY3075    |
| 2760 | CHIP1738 | STM/STY    | 1 | 1 | STM2999 | ppdB | prepilin peç STY3137    |
| 2761 | CHIP2840 | STM/STY    | 1 | 1 | STM1686 | pspE | phage shor STY1375      |
| 2762 | CHIP4401 | STM/STY    | 1 | 1 | STM0501 | ybbK | putative inr STY0547    |
| 2763 | CHIP4417 | STM/STY    | 1 | 1 | STM0526 | yIbA | putative gly STY0574    |
| 2764 | CHIP4441 | STM specil | 1 | 0 | STM0575 |      | putative inner membra   |
| 2765 | CHIP1197 | STM/STY    | 1 | 1 | STM1636 |      | putative AE STY1435     |
| 2766 | CHIP2849 | STM/STY    | 1 | 1 | STM1711 | ribA | GTP cyclot STY1340      |
| 2767 | CHIP2867 | STM/STY    | 1 | 1 | STM1761 | narI | nitrate redt STY1291    |
| 2768 | CHIP2883 | STM/STY    | 1 | 1 | STM1801 | ycgO | putative CF STY1929     |
| 2769 | CHIP2899 | STM/STY    | 1 | 1 | STM1834 | yebN | putative Ye STY1963     |
| 2770 | CHIP2915 | STM/STY    | 1 | 1 | STM1860 |      | putative tra STY1995    |
| 2771 | CHIP2939 | STM/STY    | 1 | 1 | STM1907 | cutC | copper hon STY2115      |
| 2772 | CHIP4396 | STM/STY    | 1 | 1 | STM0491 | gsk  | inosine-guç STY0535     |
| 2773 | CHIP1138 | STM/STY    | 1 | 1 | STM1533 |      | putative hy STY1530     |
| 2774 | CHIP1154 | STM/STY    | 1 | 1 | STM1523 | yneJ | putative tra STY1537    |
| 2775 | CHIP1186 | STM/STY    | 1 | 1 | STM0973 | pflB | pyruvate fo STY0973     |
| 2776 | CHIP4470 | STM/STY    | 1 | 1 | STM0621 | citF | bifunctiona STY0670     |
| 2777 | CHIP2766 | STM/STY    | 1 | 1 | STM1562 |      | putative pe STY1501     |
| 2778 | CHIP2782 | STM/STY    | 1 | 1 | STM1594 | srfB | ssrAB activ STY1471     |
| 2779 | CHIP2472 | STM/STY    | 1 | 1 | STM3597 | gor  | glutathione STY4205     |
| 2780 | CHIP2488 | STM/STY    | 1 | 1 | STM3631 |      | putative xa STY4166     |
| 2781 | CHIP4624 | STM specil | 1 | 0 | STM4503 |      | putative inner membra   |
| 2782 | CHIP2528 | STM/STY    | 1 | 1 | STM3730 | dfp  | flavoproteir STY4064    |
| 2783 | CHIP4193 | STM/STY    | 1 | 1 | STM2956 | relA | (p)ppGpp ç STY3094      |
| 2784 | CHIP4305 | STM/STY    | 1 | 1 | STM2680 |      | putative cyI STY2867    |
| 2785 | CHIP4339 | STM/STY    | 1 | 0 | STM0382 |      | putative pe STY0414     |
| 2786 | CHIP4363 | STM/STY    | 1 | 0 | STM0437 |      | putative periplasmic pr |
| 2787 | CHIP4379 | STM/STY    | 1 | 1 | STM0463 | amtB | putative An STY0507     |
| 2788 | CHIP2475 | STM specil | 1 | 0 | STM3600 |      | putative sugar kinases  |
| 2789 | CHIP2499 | STM/STY    | 1 | 1 | STM3660 | xylB | xylulokinas STY4138     |
| 2790 | CHIP2515 | STM/STY    | 1 | 0 | STM3691 |      | putative inr STY4105    |
| 2791 | CHIP4326 | STM/STY    | 1 | 1 | STM4389 | yjF  | putative ou STY4745     |
| 2792 | CHIP4342 | STM/STY    | 1 | 1 | STM0388 | aroL | shikimate k STY0421     |
| 2793 | CHIP4358 | STM/STY    | 1 | 1 | STM0421 | yajO | putative ox STY0460     |
| 2794 | CHIP4286 | STM/STY    | 0 | 0 |         |      | STY3333                 |
| 2795 | CHIP4590 | STM/STY    | 1 | 1 | STM2847 | hycG | hydrogena: STY2969      |
| 2796 | CHIP2502 | STM/STY    | 1 | 1 | STM3664 | malS | alpha-amyl STY4134      |
| 2797 | CHIP2132 | STM/STY    | 1 | 1 | STM3335 | yhcH | putative cyI STY3515    |

|      |          |            |   |   |         |       |                           |         |
|------|----------|------------|---|---|---------|-------|---------------------------|---------|
| 2798 | CHIP2148 | STM/STY    | 1 | 1 | STM3263 | yraL  | putative mε               | STY3446 |
| 2799 | CHIP2164 | STM/STY    | 1 | 1 | STM3153 | yqhA  | putative mε               | STY3326 |
| 2800 | CHIP4489 | STM/STY    | 1 | 1 | STM0364 | foxA  | ferrioxamin               | STY0396 |
| 2801 | CHIP4513 | STM/STY    | 1 | 1 | STM2802 | ygaM  | putative inr              | STY2925 |
| 2802 | CHIP4529 | STM/STY    | 1 | 1 | STM2201 | yeiE  | putative tra              | STY2436 |
| 2803 | CHIP4491 | STM/STY    | 1 | 0 | STM0373 | yaiU  | flagellar protein; simila |         |
| 2804 | CHIP1639 | STM/STY    | 1 | 1 | STM2183 | cdd   | cytidine/de               | STY2413 |
| 2805 | CHIP1655 | STM/STY    | 1 | 1 | STM2085 | rfbN  | LPS side c                | STY2294 |
| 2806 | CHIP4555 | STM/STY    | 1 | 1 | STM2141 | fbaB  | 3-oxoacyl-[               | STY2370 |
| 2807 | CHIP4571 | STM/STY    | 1 | 1 | STM2174 | yohl  | putative nit              | STY2404 |
| 2808 | CHIP1903 | STM/STY    | 1 | 1 | STM3417 | rpsK  | 30S riboso                | STY4381 |
| 2809 | CHIP1665 | STM/STY    | 1 | 1 | STM2108 | wcaG  | bifunctiona               | STY2320 |
| 2810 | CHIP4565 | STM/STY    | 1 | 1 | STM2167 | dld   | D-lactate d               | STY2397 |
| 2811 | CHIP1897 | STM/STY    | 1 | 1 | STM0262 | yafS  | putative S†               | STY0283 |
| 2812 | CHIP2105 | STM/STY    | 1 | 1 | STM3624 | yhjU  | putative inr              | STY4176 |
| 2813 | CHIP2121 | STM/STY    | 1 | 1 | STM3546 | yhhY  | putative tra              | STY4265 |
| 2814 | CHIP2137 | STM/STY    | 1 | 1 | STM3307 | murA  | UDP-N-acε                 | STY3486 |
| 2815 | CHIP1947 | STM/STY    | 1 | 1 | STM4385 | ptxA  | putative PT               | STY4741 |
| 2816 | CHIP1963 | STM/STY    | 1 | 1 | STM4468 | yjgK  | putative cy†              | STY4806 |
| 2817 | CHIP1979 | STM/STY    | 1 | 1 | STM4587 | creA  | putative pe               | STY4934 |
| 2818 | CHIP0289 | STM/STY    | 1 | 1 | STM3740 | gmk   | guanylate †               | STY4052 |
| 2819 | CHIP2204 | STM/STY    | 1 | 1 | STM3298 | yhbY  | putative R†               | STY3476 |
| 2820 | CHIP2220 | STM/STY    | 1 | 1 | STM3228 | yqjC  | putative pe               | STY3408 |
| 2821 | CHIP2191 | STM/STY    | 1 | 1 | STM3349 | degS  | periplasmic               | STY3529 |
| 2822 | CHIP2207 | STM/STY    | 1 | 1 | STM3262 |       | transcriptio              | STY3445 |
| 2823 | CHIP2223 | STM/STY    | 1 | 1 | STM3225 | ygjU  | putative dic              | STY3405 |
| 2824 | CHIP0356 | STM/STY    | 1 | 1 | STM0628 | pagP  | PhoPQ-act                 | STY0677 |
| 2825 | CHIP0372 | STM/STY    | 1 | 1 | STM0170 | hpt   | hypoxanthi                | STY0192 |
| 2826 | CHIP3331 | STM/STY    | 1 | 1 | STM0722 |       | putative AE               | STY0762 |
| 2827 | CHIP0351 | STM/STY    | 1 | 1 | STM4344 | yjeA  | putative py               | STY4704 |
| 2828 | CHIP0367 | STM/STY    | 1 | 1 | STM1405 | sseG  | Secretion ε               | STY1715 |
| 2829 | CHIP0383 | STM/STY    | 1 | 1 | STM1521 | marC  | putative Mε               | STY1539 |
| 2830 | CHIP3350 | STM specil | 1 | 0 | STM0762 |       | fumarate hydratase, al    |         |
| 2831 | CHIP3382 | STM/STY    | 1 | 1 | STM0808 | ybhM  | putative int              | STY0843 |
| 2832 | CHIP3414 | STM specil | 1 | 0 | STM0855 |       | putative electron transf  |         |
| 2833 | CHIP3702 | STM/STY    | 1 | 0 | STM4521 | yjiS  | putative cytoplasmic pr   |         |
| 2834 | CHIP4264 | STM specil | 1 | 0 | STM3117 |       | putative lactoylglutathic |         |
| 2835 | CHIP4383 | STM/STY    | 1 | 1 | STM0469 | rpmE2 | putative 50               | STY0512 |
| 2836 | CHIP4196 | STM/STY    | 1 | 1 | STM2965 | yqcC  | putative cy†              | STY3104 |
| 2837 | CHIP4253 | STM/STY    | 0 | 0 |         |       |                           | STY3242 |
| 2838 | CHIP0505 | STM specil | 1 | 0 | STM1866 |       | pseudogene; in-frame      |         |
| 2839 | CHIP3580 | STM/STY    | 1 | 1 | STM4271 |       | putative inr              | STY4469 |
| 2840 | CHIP3557 | STM specil | 1 | 0 | STM4216 |       | putative inner membra     |         |
| 2841 | CHIP3581 | STM/STY    | 1 | 1 | STM4274 | yjch  | putative inr              | STY4472 |
| 2842 | CHIP3526 | STM specil | 1 | 0 | STM1035 |       | Gifsy-2 prophage; ATP     |         |
| 2843 | CHIP1906 | STM/STY    | 1 | 1 | STM3422 | rpmD  | 50S riboso                | STY4376 |
| 2844 | CHIP0997 | STM specil | 0 | 0 | STM1012 |       | Gifsy-2 prophage; prot    |         |
| 2845 | CHIP4670 | STM/STY    | 1 | 1 | STM4562 |       | putative inr              | STY4912 |
| 2846 | CHIP1174 | STM/STY    | 1 | 1 | STM1564 | yddX  | putative cy†              | STY1496 |
| 2847 | CHIP1207 | STM/STY    | 1 | 0 | STM2717 |       | Fels-2 proφ               | STY4622 |
| 2848 | CHIP1152 | STM/STY    | 1 | 1 | STM0623 | citD  | citrate lyas†             | STY0672 |
| 2849 | CHIP1184 | STM/STY    | 1 | 1 | STM0953 | infA  | protein cha               | STY0951 |

|      |          |            |   |   |         |                 |                           |
|------|----------|------------|---|---|---------|-----------------|---------------------------|
| 2850 | CHIP1208 | STM/STY    | 1 | 1 | STM2716 | Fels-2 prophage | STY4621                   |
| 2851 | CHIP1407 | STM/STY    | 1 | 1 | STM0140 | yacE            | putative nu               |
| 2852 | CHIP1345 | STM/STY    | 1 | 1 | STM0280 |                 | putative ou               |
| 2853 | CHIP1362 | STM/STY    | 1 | 1 | STM0181 | panC            | pantothena                |
| 2854 | CHIP1452 | STM/STY    | 1 | 1 | STM0389 | yaiA            | putative cyf              |
| 2855 | CHIP2619 | STM/STY    | 1 | 1 | STM0020 |                 | putative cyf              |
| 2856 | CHIP4285 | STM/STY    | 1 | 1 | STM3160 |                 | putative inr              |
| 2857 | CHIP2911 | STM/STY    | 1 | 1 | STM1852 | yebW            | putative inr              |
| 2858 | CHIP2777 | STM/STY    | 1 | 1 | STM1585 |                 | putative ou               |
| 2859 | CHIP1560 | STM/STY    | 1 | 1 | STM0470 | rpmJ2           | putative 50               |
| 2860 | CHIP2901 | STM/STY    | 1 | 1 | STM1838 | yobF            | putative cyf              |
| 2861 | CHIP2767 | STM/STY    | 1 | 1 | STM1565 | rpsV            | 30S riboso                |
| 2862 | CHIP3360 | STM/STY    | 1 | 1 | STM0780 |                 | putative ou               |
| 2863 | CHIP0652 | STM specil | 1 | 0 | PSLT041 | spvR            | Salmonella plasmid vir    |
| 2864 | CHIP1107 | STM specil | 1 | 0 | PSLT098 | traQ            | conjugative transfer: fir |
| 2865 | CHIP1092 | STM specil | 1 | 0 | PSLT083 | trbD            | conjugative transfer:     |
| 2866 | CHIP0622 | STM specil | 1 | 0 | PSLT103 | traT            | conjugative transfer: st  |
| 2867 | CHIP1069 | STM specil | 1 | 0 | PSLT052 | parA            | plasmid partition protei  |
| 2868 | CHIP1101 | STM specil | 1 | 0 | PSLT092 | traU            | conjugative transfer: a:  |
| 2869 | CHIP4885 | none       | 0 | 0 | R460021 | nuc             |                           |
| 2870 | CHIP4879 | none       | 0 | 0 | R460014 | eex             |                           |
| 2871 | CHIP4872 | none       | 0 | 0 | R460007 | korB            |                           |
| 2872 | CHIP4873 | none       | 0 | 0 | R460008 | traL            |                           |
| 2873 | CHIP4907 | none       | 0 | 0 | R460061 | arsB            |                           |
| 2874 | CHIP4901 | none       | 0 | 0 | R460054 | tetR            |                           |
| 2875 | CHIP4825 | STM specil | 1 | 0 | STM2703 |                 | Fels-2 prophage: simil    |
| 2876 | CHIP4829 | STM specil | 0 | 0 |         |                 |                           |
| 2877 | CHIP4833 | STM specil | 1 | 0 | STM0912 |                 | Fels-1 prophage; prote    |
| 2878 | CHIP4837 | STM/STY    | 0 | 0 |         |                 |                           |
| 2879 | CHIP4841 | STM/STY    | 0 | 0 |         |                 |                           |
| 2880 | CHIP4845 | STM specil | 0 | 0 |         |                 |                           |
| 2881 | CHIP5013 | STY specif | 0 | 1 |         |                 | STY1499                   |
| 2882 | CHIP5029 | STY specif | 0 | 1 |         |                 | STY1605                   |
| 2883 | CHIP5045 | STY specif | 0 | 1 |         |                 | STY1621                   |
| 2884 | CHIP5060 | STY specif | 0 | 1 |         |                 | STY1639                   |
| 2885 | CHIP5076 | STY specif | 0 | 1 |         |                 | STY2005                   |
| 2886 | CHIP5089 | STY specif | 0 | 1 |         |                 | STY2028                   |
| 2887 | CHIP5031 | STY specif | 0 | 1 |         |                 | STY1607                   |
| 2888 | CHIP5047 | STY specif | 0 | 1 |         |                 | STY1623                   |
| 2889 | CHIP5062 | STM/STY    | 0 | 1 |         |                 | STY1649                   |
| 2890 | CHIP5078 | STY specif | 0 | 1 |         |                 | STY2007                   |
| 2891 | CHIP5091 | STY specif | 0 | 1 |         |                 | STY2030                   |
| 2892 | CHIP5200 | STY specif | 0 | 1 |         |                 | STY3192                   |
| 2893 | CHIP4954 | STY specif | 0 | 1 |         |                 | STY1014                   |
| 2894 | CHIP4970 | STY specif | 0 | 1 |         |                 | STY1041                   |
| 2895 | CHIP4985 | STY specif | 0 | 1 |         |                 | STY1057                   |
| 2896 | CHIP5001 | STY specif | 0 | 0 |         |                 | STY1073                   |
| 2897 | CHIP5202 | STY specif | 0 | 1 |         |                 | STY3277                   |
| 2898 | CHIP5214 | STM/STY    | 0 | 0 | STM0768 | dcoB            | Oxalacetat                |
| 2899 | CHIP4972 | STM/STY    | 0 | 0 |         |                 | STY3531                   |
| 2900 | CHIP4987 | STY specif | 0 | 1 |         |                 | STY1059                   |
| 2901 | CHIP5095 | STY specif | 0 | 0 |         |                 | STY2034                   |



|      |          |            |   |   |         |      |                          |
|------|----------|------------|---|---|---------|------|--------------------------|
| 2902 | CHIP5204 | STY specif | 0 | 1 |         |      | STY3279                  |
| 2903 | CHIP5134 | STY specif | 0 | 1 |         |      | STY2075                  |
| 2904 | CHIP5150 | STY specif | 0 | 1 |         |      | STY2353                  |
| 2905 | CHIP5300 | STY specif | 0 | 1 |         |      | STY4524                  |
| 2906 | CHIP5315 | STY specif | 0 | 1 |         |      | STY4548                  |
| 2907 | CHIP5329 | STY specif | 0 | 1 |         |      | STY4568                  |
| 2908 | CHIP5345 | STY specif | 0 | 1 |         |      | STY4585                  |
| 2909 | CHIP5361 | STY specif | 0 | 1 |         |      | STY4602                  |
| 2910 | CHIP5293 | STY specif | 0 | 1 |         |      | STY4414                  |
| 2911 | CHIP5364 | STM/STY    | 0 | 0 |         |      |                          |
| 2912 | empty    | none       | 0 | 0 |         |      |                          |
| 2913 | empty    | none       | 0 | 0 |         |      |                          |
| 2914 | empty    | none       | 0 | 0 |         |      |                          |
| 2915 | empty    | none       | 0 | 0 |         |      |                          |
| 2916 | empty    | none       | 0 | 0 |         |      |                          |
| 2917 | CHIP0842 | STM/STY    | 1 | 1 | STM1780 | prsA | phosphorib STY1906       |
| 2918 | CHIP2657 | STM/STY    | 1 | 1 | STM0106 | yabJ | putative AE STY0123      |
| 2919 | CHIP3249 | STM/STY    | 1 | 1 | STM3338 | nanT | MFS family STY3519       |
| 2920 | CHIP3265 | STM/STY    | 1 | 1 | STM3372 | mreD | rod shape- STY3552       |
| 2921 | CHIP2713 | STM/STY    | 1 | 1 | STM0214 | glnD | uridylyltran: STY0237    |
| 2922 | CHIP3305 | STM/STY    | 1 | 1 | STM0682 | nagC | transcriptio STY0720     |
| 2923 | CHIP3275 | STM/STY    | 1 | 0 | STM3390 | acrE | transmemt STY3569        |
| 2924 | CHIP2723 | STM/STY    | 1 | 1 | STM0235 | yaeR | putative lac STY0260     |
| 2925 | CHIP2739 | STM/STY    | 1 | 0 | STM1515 | ydeI | putative periplasmic pr  |
| 2926 | CHIP0781 | STM/STY    | 1 | 1 | STM1964 | yedD | putative ou STY2172      |
| 2927 | CHIP0797 | STM/STY    | 1 | 1 | STM3710 | rfaD | ADP-L-glyc STY4085       |
| 2928 | CHIP0813 | STM/STY    | 1 | 1 | STM2025 | cbiK | synthesis c STY2229      |
| 2929 | CHIP0783 | STM/STY    | 1 | 1 | STM1963 | amyA | cytoplasmic STY2171      |
| 2930 | CHIP0807 | STM/STY    | 1 | 1 | STM2031 | cbiE | synthesis c STY2236      |
| 2931 | CHIP0823 | STM/STY    | 1 | 1 | STM1997 | umuC | error-prone STY2205      |
| 2932 | CHIP2630 | STM/STY    | 1 | 1 | STM0046 | ileS | isoleucine t STY0055     |
| 2933 | CHIP2646 | STM/STY    | 1 | 1 | STM0082 |      | putative se STY0095      |
| 2934 | CHIP3238 | STM/STY    | 1 | 1 | STM3311 | yrbD | putative AE STY3490      |
| 2935 | CHIP3784 | STM specif | 1 | 0 | STM0331 |      | putative fumarylacetoa   |
| 2936 | CHIP3800 | STM/STY    | 1 | 1 | STM1066 | rmf  | ribosome n STY1087       |
| 2937 | CHIP3824 | STM/STY    | 1 | 1 | STM1109 |      | putative pe STY1143      |
| 2938 | CHIP3840 | STM/STY    | 1 | 1 | STM1151 | mdoH | membrane STY1188         |
| 2939 | CHIP3856 | STM/STY    | 1 | 1 | STM1200 | tmk  | thymidylate STY1239      |
| 2940 | CHIP3872 | STM/STY    | 1 | 1 | STM1220 | ycfX | putative re STY1260      |
| 2941 | CHIP3834 | STM/STY    | 1 | 1 | STM1131 |      | putative ou STY1168      |
| 2942 | CHIP3850 | STM/STY    | 1 | 1 | STM1185 | rne  | RNase E STY1226          |
| 2943 | CHIP3866 | STM/STY    | 1 | 1 | STM1212 | ycfJ | putative ou STY1252      |
| 2944 | CHIP2442 | STM specif | 1 | 0 | STM3533 |      | putative bacterial trans |
| 2945 | CHIP2458 | STM/STY    | 1 | 1 | STM3572 | yhhF | putative m STY4239       |
| 2946 | CHIP3723 | STM/STY    | 1 | 1 | STM4567 | deoC | 2-deoxyrib STY4918       |
| 2947 | CHIP3884 | STM/STY    | 1 | 1 | STM1264 | aadA | Aminoglyc STY1857        |
| 2948 | CHIP3900 | STM/STY    | 1 | 1 | STM1289 | yeaD | putative en STY1827      |
| 2949 | CHIP3725 | STM specif | 1 | 0 | STM4571 |      | putative outer membra    |
| 2950 | CHIP3741 | STM/STY    | 1 | 1 | STM0002 | thrA | aspartokin STY0002       |
| 2951 | CHIP4053 | STM specif | 1 | 0 | STM2746 |      | putative Excinuclease ,  |
| 2952 | CHIP4069 | STM specif | 1 | 0 | STM2762 |      | putative inner membra    |
| 2953 | CHIP3719 | STM/STY    | 1 | 1 | STM4549 |      | putative cy STY4902      |

|      |          |            |   |   |         |      |                            |         |
|------|----------|------------|---|---|---------|------|----------------------------|---------|
| 2954 | CHIP3735 | STM/STY    | 1 | 1 | STM4589 | creC | sensory kir                | STY4936 |
| 2955 | CHIP3759 | STM/STY    | 1 | 0 | STM0288 |      | putative cy                | STY0317 |
| 2956 | CHIP4071 | STM specil | 1 | 0 | STM2764 |      | putative integrase core    |         |
| 2957 | CHIP4087 | STM/STY    | 1 | 1 | STM2789 |      | putative cy                | STY2909 |
| 2958 | CHIP3815 | STM/STY    | 1 | 1 | STM1095 | copS | Copper res                 | STY1127 |
| 2959 | CHIP3049 | STM/STY    | 1 | 1 | STM2389 | yfcY | paral putati               | STY2621 |
| 2960 | CHIP3065 | STM/STY    | 1 | 1 | STM2425 | yfeH | putative N <sub>2</sub>    | STY2661 |
| 2961 | CHIP3081 | STM/STY    | 1 | 1 | STM2478 |      | putative be                | STY2716 |
| 2962 | CHIP3481 | STM/STY    | 1 | 1 | STM0950 |      | homologue                  | STY0948 |
| 2963 | CHIP3497 | STM/STY    | 1 | 1 | STM0981 | rpsA | 30S riboso                 | STY0981 |
| 2964 | CHIP3513 | STM/STY    | 0 | 1 | STM1020 |      | Gifsy-2 pro                | STY1034 |
| 2965 | CHIP3483 | STM/STY    | 1 | 1 | STM0955 | aat  | leucyl, phe                | STY0953 |
| 2966 | CHIP3123 | STM/STY    | 1 | 1 | STM2564 | yfhK | putative se                | STY2811 |
| 2967 | CHIP4100 | STM/STY    | 1 | 1 | STM4031 |      | putative cy                | STY3847 |
| 2968 | CHIP4132 | STM/STY    | 1 | 1 | STM4109 | talC | putative tra               | STY3758 |
| 2969 | CHIP4156 | STM/STY    | 1 | 1 | STM2868 |      | putative cy                | STY2989 |
| 2970 | CHIP3604 | STM/STY    | 1 | 1 | STM4327 | fxsA | suppresses                 | STY4687 |
| 2971 | CHIP3086 | STM/STY    | 1 | 1 | STM2487 | purC | phosphorib                 | STY2725 |
| 2972 | CHIP3110 | STM/STY    | 1 | 1 | STM2535 | sseB | enhances :                 | STY2781 |
| 2973 | CHIP3126 | STM/STY    | 1 | 1 | STM2570 |      | putative ph                | STY2816 |
| 2974 | CHIP4103 | STM/STY    | 1 | 1 | STM4044 |      | putative iro               | STY3830 |
| 2975 | CHIP4119 | STM/STY    | 1 | 1 | STM4086 | glpK | glycerol kin               | STY3784 |
| 2976 | CHIP4143 | STM/STY    | 1 | 1 | STM4122 | argB | acetylgluta                | STY3751 |
| 2977 | CHIP2993 | STM/STY    | 1 | 1 | STM2284 | glpA | sn-glycerol                | STY2513 |
| 2978 | CHIP3689 | STM specil | 1 | 0 | STM4498 |      | putative inner membra      |         |
| 2979 | CHIP3705 | STM/STY    | 1 | 1 | STM4526 | hsdR | endonuclea                 | STY4884 |
| 2980 | CHIP0202 | STM/STY    | 1 | 1 | STM1922 | motB | enables fla                | STY2131 |
| 2981 | CHIP2301 | STM/STY    | 1 | 1 | STM1323 | yniB | putative re                | STY1788 |
| 2982 | CHIP0250 | STM/STY    | 1 | 1 | STM0370 | prpD | putative pr                | STY0402 |
| 2983 | CHIP0244 | STM/STY    | 1 | 1 | STM4237 | lexA | SOS respo                  | STY4433 |
| 2984 | CHIP0268 | STM/STY    | 1 | 1 | STM2861 | sitA | Salmonella                 | STY2983 |
| 2985 | CHIP2367 | STM/STY    | 1 | 1 | STM1445 | slyB | putative ou                | STY1677 |
| 2986 | CHIP3636 | STM/STY    | 1 | 1 | STM4398 | cycA | APC family                 | STY4754 |
| 2987 | CHIP3652 | STM specil | 1 | 0 | STM4425 |      | putative dehydrogenas      |         |
| 2988 | CHIP3668 | STM/STY    | 1 | 1 | STM4448 |      | putative ph                | STY4787 |
| 2989 | CHIP3638 | STM/STY    | 1 | 1 | STM4403 | cpdB | 2':3'-cyclic-              | STY4761 |
| 2990 | CHIP3654 | STM specil | 1 | 0 | STM4427 |      | putative endonuclease      |         |
| 2991 | CHIP3670 | STM/STY    | 1 | 1 | STM4454 | treB | pseudogen                  | STY4794 |
| 2992 | CHIP3686 | STM specil | 1 | 0 | STM4495 |      | putative type II restricti |         |
| 2993 | CHIP3710 | STM specil | 1 | 0 | STM4536 |      | putative PTS permeas       |         |
| 2994 | CHIP0215 | STM/STY    | 1 | 1 | STM1256 |      | putative AE                | STY1864 |
| 2995 | CHIP3984 | STM/STY    | 1 | 1 | STM1493 |      | putative pe                | STY1571 |
| 2996 | CHIP1316 | STM/STY    | 1 | 1 | STM3801 | dsdX | putative Gr                | STY3978 |
| 2997 | CHIP1428 | STM/STY    | 1 | 1 | STM3826 | torS | sensory kir                | STY3951 |
| 2998 | CHIP1444 | STM/STY    | 1 | 1 | STM0360 |      | cytochrom $\epsilon$       | STY0392 |
| 2999 | CHIP1380 | STM/STY    | 1 | 1 | STM0077 | fixC | related to c               | STY0087 |
| 3000 | CHIP1396 | STM/STY    | 1 | 1 | STM0151 | pdhR | transcriptio               | STY0174 |
| 3001 | CHIP1478 | STM/STY    | 1 | 1 | STM4238 | dinF | DNA-dama                   | STY4434 |
| 3002 | CHIP1502 | STM/STY    | 1 | 1 | STM2330 | lrhA | NADH deh                   | STY2560 |
| 3003 | CHIP3923 | STM/STY    | 1 | 1 | STM1342 | btuD | ABC super                  | STY1768 |
| 3004 | CHIP0516 | STM/STY    | 1 | 1 | STM0865 | ybjG | putative pe                | STY0898 |
| 3005 | CHIP3963 | STM/STY    | 1 | 1 | STM1458 | ydgM | putative alt               | STY1664 |

|      |          |            |   |   |               |                           |         |
|------|----------|------------|---|---|---------------|---------------------------|---------|
| 3006 | CHIP3987 | STM/STY    | 1 | 1 | STM1499       | putative dir              | STY1565 |
| 3007 | CHIP3989 | STM/STY    | 1 | 1 | STM1501 ynfC  | putative inr              | STY1562 |
| 3008 | CHIP1321 | STM/STY    | 1 | 1 | STM3791       | putative cyI              | STY3991 |
| 3009 | CHIP1433 | STM/STY    | 1 | 1 | STM2574       | putative pe               | STY2820 |
| 3010 | CHIP1457 | STM/STY    | 1 | 1 | STM0404 queA  | S-adenosyl                | STY0442 |
| 3011 | CHIP1473 | STM/STY    | 1 | 1 | STM4192       | putative cyI              | STY4409 |
| 3012 | CHIP1497 | STM/STY    | 1 | 1 | STM2368 truA  | pseudourid                | STY2599 |
| 3013 | CHIP0969 | STM/STY    | 1 | 0 | STM0347       | putative re               | STY0381 |
| 3014 | CHIP1532 | STM/STY    | 1 | 1 | STM2527       | putative po               | STY2772 |
| 3015 | CHIP1556 | STM/STY    | 1 | 1 | STM0460 mdlA  | putative AE               | STY0503 |
| 3016 | CHIP1572 | STM/STY    | 1 | 1 | STM0566       | putative inr              | STY0614 |
| 3017 | CHIP4741 | STM/STY    | 1 | 1 | STM1329       | putative inr              | STY1782 |
| 3018 | CHIP1996 | STM/STY    | 1 | 1 | STM4408 msrA  | peptide me                | STY4767 |
| 3019 | CHIP2006 | STM/STY    | 1 | 1 | STM4476 holC  | DNA polym                 | STY4815 |
| 3020 | CHIP3170 | STM/STY    | 1 | 1 | STM2648 yfiF  | putative tR               | STY2841 |
| 3021 | CHIP3186 | STM/STY    | 1 | 1 | STM3199 yqiK  | paral putati              | STY3378 |
| 3022 | CHIP3202 | STM/STY    | 1 | 1 | STM3241 tdcE  | pyruvate fo               | STY3423 |
| 3023 | CHIP3218 | STM/STY    | 1 | 1 | STM3274 yhbU  | putative pr               | STY3457 |
| 3024 | CHIP0988 | STM/STY    | 1 | 1 | STM4099 metJ  | transcriptio              | STY3770 |
| 3025 | CHIP1014 | STM/STY    | 1 | 0 | STM1380 orf32 | putative hydrolase or a   |         |
| 3026 | CHIP1577 | STM/STY    | 1 | 1 | STM0471 ylaC  | putative inr              | STY0514 |
| 3027 | CHIP1601 | STM/STY    | 1 | 1 | STM2791 gabD  | succinate-ε               | STY2911 |
| 3028 | CHIP3149 | STM specil | 1 | 0 | STM2605       | Gifsy-1 prophage: simi    |         |
| 3029 | CHIP3165 | STM/STY    | 1 | 1 | STM2639 rseA  | anti sigma                | STY2832 |
| 3030 | CHIP3181 | STM/STY    | 1 | 0 | STM3191       | putative arylsulfate sulf |         |
| 3031 | CHIP2051 | STM/STY    | 1 | 1 | STM3619 yhjO  | glycosyltra               | STY4181 |
| 3032 | CHIP3215 | STM/STY    | 1 | 1 | STM3269 yhbO  | putative int              | STY3452 |
| 3033 | CHIP0577 | STM/STY    | 1 | 1 | STM1419 yscR  | Secretion ε               | STY1701 |
| 3034 | CHIP0601 | STM/STY    | 1 | 1 | STM2499 purM  | phosphorib                | STY2740 |
| 3035 | CHIP0713 | STM/STY    | 1 | 1 | STM1125 putP  | SSS family                | STY1160 |
| 3036 | CHIP0729 | STM/STY    | 1 | 1 | STM2808 nrdF  | ribonucleo                | STY2933 |
| 3037 | CHIP1878 | STM/STY    | 1 | 1 | STM0271       | putative cyI              | STY0292 |
| 3038 | CHIP0588 | STM/STY    | 1 | 1 | STM2882 sipA  | cell invasio              | STY3005 |
| 3039 | CHIP0612 | STM/STY    | 1 | 1 | STM3501 envZ  | sensory his               | STY4295 |
| 3040 | CHIP0628 | STM/STY    | 1 | 1 | STM1694 sapC  | ABC super                 | STY1357 |
| 3041 | CHIP0644 | STM/STY    | 1 | 1 | STM4047 rhaB  | rhamnuloki                | STY3826 |
| 3042 | CHIP0764 | STM/STY    | 1 | 1 | STM0550 fimY  | putative re               | STY0598 |
| 3043 | CHIP0719 | STM/STY    | 1 | 1 | STM1224 sifA  | lysosomal                 | STY1264 |
| 3044 | CHIP0647 | STM/STY    | 1 | 1 | STM1163 pyrC  | dihydro-orc               | STY1201 |
| 3045 | CHIP0671 | STM/STY    | 1 | 1 | STM3470 fic   | putative ce               | STY4326 |
| 3046 | CHIP1818 | STM/STY    | 1 | 1 | STM4038 fdhD  | putative for              | STY3838 |
| 3047 | CHIP1850 | STM/STY    | 1 | 1 | STM0640 mrdA  | cell elonga               | STY0691 |
| 3048 | CHIP1882 | STM/STY    | 1 | 1 | STM0256 yafC  | putative tra              | STY0277 |
| 3049 | CHIP3962 | STM/STY    | 1 | 0 | STM1457       | putative respiratory-ch   |         |
| 3050 | CHIP0394 | STM/STY    | 1 | 1 | STM2884 sipC  | cell invasio              | STY3007 |
| 3051 | CHIP0410 | STM/STY    | 1 | 1 | STM1171 flgN  | flagellar bic             | STY1210 |
| 3052 | CHIP0434 | STM/STY    | 1 | 1 | STM4254 uvrA  | UvrA with l               | STY4450 |
| 3053 | CHIP1285 | STM/STY    | 1 | 1 | STM2688 smpB  | small prote               | STY2874 |
| 3054 | CHIP1309 | STM/STY    | 1 | 1 | STM0035       | putative ar               | STY0042 |
| 3055 | CHIP0117 | STM/STY    | 1 | 1 | STM4139 coaA  | pantothen                 | STY3740 |
| 3056 | CHIP4716 | STM/STY    | 1 | 1 | STM3688       | putative cyI              | STY4108 |
| 3057 | CHIP0157 | STM/STY    | 1 | 1 | STM3865 atpD  | membrane                  | STY3913 |

|      |          |            |   |   |         |      |                        |         |
|------|----------|------------|---|---|---------|------|------------------------|---------|
| 3058 | CHIP4347 | STM/STY    | 1 | 1 | STM0395 | sbcC | ATP-deper              | STY0429 |
| 3059 | CHIP0397 | STM/STY    | 1 | 1 | STM2889 | spaQ | surface pre            | STY3012 |
| 3060 | CHIP0413 | STM/STY    | 1 | 1 | STM2064 | phsB | Hydrogen s             | STY2270 |
| 3061 | CHIP1242 | STM/STY    | 1 | 1 | STM1917 | cheB | methyl est             | STY2126 |
| 3062 | CHIP1266 | STM/STY    | 1 | 1 | STM1709 | yciS | putative inr           | STY1342 |
| 3063 | CHIP0455 | STM/STY    | 1 | 1 | STM1391 | ssrB | Secretion s            | STY1729 |
| 3064 | CHIP0471 | STM/STY    | 1 | 1 | STM3722 | rfaG | glucosyltra            | STY4072 |
| 3065 | CHIP4679 | STM/STY    | 1 | 1 | STM0348 |      | putative inr           | STY0382 |
| 3066 | CHIP0120 | STM/STY    | 1 | 0 | STM4162 | thiF | catalyzes tl           | STY3723 |
| 3067 | CHIP0002 | STM/STY    | 1 | 1 | STM3986 | trkH | Trk family,            | STY3574 |
| 3068 | CHIP0493 | STM/STY    | 1 | 1 | STM2522 | hisS | histidine tR           | STY2767 |
| 3069 | CHIP0058 | STM/STY    | 1 | 1 | STM3924 | wecD | lipopolysac            | STY3631 |
| 3070 | CHIP0074 | STM/STY    | 1 | 1 | STM3905 | ilvA | threonine c            | STY3652 |
| 3071 | CHIP1701 | STM/STY    | 1 | 1 | STM1762 | narJ | nitrate redt           | STY1290 |
| 3072 | CHIP1717 | STM/STY    | 1 | 1 | STM1791 |      | putative hy            | STY1918 |
| 3073 | CHIP1727 | STM/STY    | 1 | 1 | STM1735 | yciB | putative int           | STY1316 |
| 3074 | CHIP0916 | STM/STY    | 1 | 1 | STM0145 | nadC | quinolinate            | STY0167 |
| 3075 | CHIP0940 | STM/STY    | 1 | 1 | STM0426 | phnV | 2-aminoeth             | STY0465 |
| 3076 | CHIP1791 | STM/STY    | 1 | 1 | STM4035 | fdol | formate de             | STY3842 |
| 3077 | CHIP0393 | STM/STY    | 1 | 1 | STM1395 | ssaD | Secretion s            | STY1725 |
| 3078 | CHIP0761 | STM/STY    | 1 | 1 | STM0547 | fimH | minor fimb             | STY0594 |
| 3079 | CHIP0039 | STM/STY    | 1 | 1 | STM3948 | yigA | putative cy            | STY3611 |
| 3080 | CHIP0071 | STM/STY    | 1 | 1 | STM3909 | ilvC | ketol-acid r           | STY3648 |
| 3081 | CHIP2699 | STM/STY    | 1 | 1 | STM0184 | pcnB | poly(A) pol            | STY0209 |
| 3082 | CHIP1706 | STM/STY    | 1 | 1 | STM1831 | manY | Sugar Spe              | STY1960 |
| 3083 | CHIP1722 | STM/STY    | 1 | 1 | STM1784 | ychF | putative G             | STY1910 |
| 3084 | CHIP0911 | STM/STY    | 1 | 1 | STM2896 | invA | invasion pr            | STY3019 |
| 3085 | CHIP4385 | STM/STY    | 1 | 1 | STM0474 | ybaJ | putative cy            | STY0517 |
| 3086 | CHIP1141 | STM/STY    | 1 | 1 | STM1539 |      | putative hy            | STY1523 |
| 3087 | CHIP1157 | STM/STY    | 1 | 1 | STM1516 | ydeE | putative M             | STY1544 |
| 3088 | CHIP1181 | STM/STY    | 1 | 1 | STM0966 | dmsC | anaerobic r            | STY0964 |
| 3089 | CHIP4465 | STM/STY    | 1 | 1 | STM0611 |      | putative ox            | STY0659 |
| 3090 | CHIP2753 | STM/STY    | 1 | 0 | STM1546 |      | putative m             | STY1515 |
| 3091 | CHIP2771 | STM specil | 1 | 0 | STM1569 | fdnH | formate dehydrogenas   |         |
| 3092 | CHIP2787 | STM/STY    | 1 | 1 | STM1602 | sifB | Salmonella             | STY1462 |
| 3093 | CHIP2803 | STM specil | 1 | 0 | STM1626 | trg  | methyl-accepting cherr |         |
| 3094 | CHIP2819 | STM/STY    | 1 | 1 | STM1648 | hslJ | heat shock             | STY1421 |
| 3095 | CHIP2843 | STM/STY    | 1 | 1 | STM1697 |      | putative Di            | STY1354 |
| 3096 | CHIP4404 | STM/STY    | 1 | 1 | STM0508 | ybbP | putative inr           | STY0554 |
| 3097 | CHIP4406 | STM/STY    | 1 | 1 | STM0511 | sfbB | putative AE            | STY0559 |
| 3098 | CHIP4422 | STM/STY    | 1 | 1 | STM0536 | ppiB | peptidyl-pr            | STY0584 |
| 3099 | CHIP4454 | STM/STY    | 1 | 1 | STM0595 | entC | isochorism             | STY0639 |
| 3100 | CHIP1210 | STM/STY    | 1 | 1 | STM2710 |      | Fels-2 pro             | STY4615 |
| 3101 | CHIP2870 | STM/STY    | 1 | 1 | STM1768 | ychP | putative inv           | STY1284 |
| 3102 | CHIP2886 | STM/STY    | 1 | 1 | STM1806 | nhaB | NhaB famil             | STY1935 |
| 3103 | CHIP4592 | STM/STY    | 1 | 0 | STM2729 |      | Fels-2 prophage: simil |         |
| 3104 | CHIP4608 | STM/STY    | 1 | 1 | STM3012 |      | putative tra           | STY3156 |
| 3105 | CHIP2512 | STM/STY    | 1 | 1 | STM3683 | selA | selenocyst             | STY4113 |
| 3106 | CHIP2536 | STM/STY    | 1 | 1 | STM3752 |      | putative cy            | STY4041 |
| 3107 | CHIP4289 | STM/STY    | 1 | 1 | STM3168 | ygiR | putative Fe            | STY3342 |
| 3108 | CHIP4217 | STM/STY    | 1 | 1 | STM3005 | mutH | methyl-dire            | STY3148 |
| 3109 | CHIP4251 | STM specil | 1 | 0 | STM3085 |      | putative outer membra  |         |

|      |          |            |   |   |         |              |                          |         |
|------|----------|------------|---|---|---------|--------------|--------------------------|---------|
| 3110 | CHIP4275 | STM/STY    | 1 | 1 | STM3137 | putative urc | STY3308                  |         |
| 3111 | CHIP4579 | STM/STY    | 1 | 1 | STM2810 | proW         | ABC super                | STY2936 |
| 3112 | CHIP4595 | STM/STY    | 1 | 1 | STM2800 |              | putative inr             | STY2923 |
| 3113 | CHIP4619 | STM/STY    | 1 | 1 | STM3382 | panF         | SSS family               | STY3562 |
| 3114 | CHIP4635 | STM specil | 1 | 0 | STM1040 |              | Gifsy-2 prophage; prot   |         |
| 3115 | CHIP4238 | STM/STY    | 1 | 1 | STM3055 | gcvT         | glycine cle              | STY3211 |
| 3116 | CHIP4254 | STM/STY    | 1 | 0 | STM3089 | yqgD         | putative inner membra    |         |
| 3117 | CHIP4270 | STM/STY    | 1 | 1 | STM3124 |              | putative re              | STY3293 |
| 3118 | CHIP4382 | STM/STY    | 1 | 1 | STM0468 | ylaB         | putative di              | STY0511 |
| 3119 | CHIP2478 | STM/STY    | 1 | 1 | STM3609 | yhjE         | putative Mf              | STY4194 |
| 3120 | CHIP4622 | STM specil | 1 | 0 | STM4429 |              | putative cytoplasmic pr  |         |
| 3121 | CHIP1948 | STM/STY    | 1 | 1 | STM4387 | sgaU         | putative he              | STY4743 |
| 3122 | CHIP1964 | STM/STY    | 1 | 1 | STM4474 | yjgN         | putative inr             | STY4813 |
| 3123 | CHIP1980 | STM/STY    | 1 | 1 | STM4590 | creD         | tolerance tr             | STY4937 |
| 3124 | CHIP1613 | STM/STY    | 1 | 1 | STM2841 | ygbD         | putative ox              | STY2963 |
| 3125 | CHIP1637 | STM/STY    | 1 | 1 | STM2180 |              | putative tra             | STY2410 |
| 3126 | CHIP1653 | STM/STY    | 1 | 1 | STM2083 | rfbK         | LPS side c               | STY2292 |
| 3127 | CHIP1615 | STM/STY    | 1 | 1 | STM2801 | ygaC         | putative cy              | STY2924 |
| 3128 | CHIP4523 | STM/STY    | 1 | 1 | STM2193 | folE         | GTP cyclot               | STY2427 |
| 3129 | CHIP1663 | STM/STY    | 1 | 1 | STM2103 | wcaJ         | putative UI              | STY2315 |
| 3130 | CHIP1679 | STM/STY    | 1 | 1 | STM2176 |              | putative glt             | STY2406 |
| 3131 | CHIP1695 | STM/STY    | 1 | 1 | STM1799 | emtA         | membrane                 | STY1927 |
| 3132 | CHIP2095 | STM/STY    | 1 | 1 | STM3674 | lyxK         | L-xylulose               | STY4122 |
| 3133 | CHIP4549 | STM specil | 1 | 0 | STM2240 |              | putative cytoplasmic pr  |         |
| 3134 | CHIP1689 | STM/STY    | 1 | 1 | STM1842 | kdgR         | putative tra             | STY1972 |
| 3135 | CHIP2089 | STM/STY    | 1 | 1 | STM3690 |              | putative inr             | STY4106 |
| 3136 | CHIP1921 | STM/STY    | 1 | 1 | STM3441 | rpsJ         | 30S riboso               | STY4357 |
| 3137 | CHIP1937 | STM/STY    | 1 | 1 | STM4360 | miaA         | delta(2)-isc             | STY4717 |
| 3138 | CHIP2153 | STM/STY    | 1 | 1 | STM3240 | tdcG         | L-serine de              | STY3422 |
| 3139 | CHIP2139 | STM/STY    | 1 | 1 | STM3301 | yhbZ         | putative G               | STY3480 |
| 3140 | CHIP2155 | STM/STY    | 1 | 1 | STM3217 | aer          | aerotaxis s              | STY3395 |
| 3141 | CHIP2171 | STM/STY    | 1 | 1 | STM3139 | gsp          | bifunctiona              | STY3310 |
| 3142 | CHIP2180 | STM/STY    | 1 | 1 | STM3066 | yggA         | putative LY              | STY3222 |
| 3143 | CHIP0321 | STM/STY    | 1 | 1 | STM1178 | flgF         | flagellar bic            | STY1217 |
| 3144 | CHIP2228 | STM/STY    | 1 | 1 | STM3207 | ygiH         | putative inr             | STY3386 |
| 3145 | CHIP0308 | STM/STY    | 1 | 1 | STM1386 | ttrS         | Tetrathion               | STY1735 |
| 3146 | CHIP0324 | STM specil | 0 | 0 | STM3753 | sugR         | ATP binding protein      |         |
| 3147 | CHIP2231 | STM/STY    | 1 | 1 | STM3194 |              | putative di              | STY3372 |
| 3148 | CHIP2247 | STM/STY    | 1 | 1 | STM3103 | yggV         | putative X               | STY3256 |
| 3149 | CHIP2263 | STM/STY    | 1 | 1 | STM3051 | bglA         | 6-phospho                | STY3207 |
| 3150 | CHIP3347 | STM/STY    | 1 | 1 | STM0759 | ybgS         | putative ho              | STY0800 |
| 3151 | CHIP2242 | STM/STY    | 1 | 1 | STM3136 |              | putative D-              | STY3307 |
| 3152 | CHIP2258 | STM/STY    | 1 | 1 | STM3072 |              | putative inr             | STY3230 |
| 3153 | CHIP2274 | STM/STY    | 1 | 1 | STM1105 | hpaH         | 4-hydroxyp               | STY1139 |
| 3154 | CHIP3358 | STM/STY    | 1 | 1 | STM0777 |              | putative inr             | STY0810 |
| 3155 | CHIP3390 | STM/STY    | 1 | 1 | STM0818 |              | membrane                 | STY0853 |
| 3156 | CHIP3422 | STM/STY    | 1 | 1 | STM0863 | dacC         | D-alanyl-D-              | STY0896 |
| 3157 | CHIP4381 | STM/STY    | 1 | 1 | STM0466 | ybaZ         | putative m               | STY0510 |
| 3158 | CHIP4343 | STM/STY    | 1 | 1 | STM0391 | yaiE         | putative cy              | STY0424 |
| 3159 | CHIP4273 | STM/STY    | 1 | 0 | STM3127 |              | putative cy              | STY3296 |
| 3160 | CHIP4432 | STM specil | 1 | 0 | STM0561 |              | Sensor protein           |         |
| 3161 | CHIP4433 | STM specil | 1 | 0 | STM0562 |              | putative transport prote |         |

|      |          |            |   |   |         |       |                         |         |
|------|----------|------------|---|---|---------|-------|-------------------------|---------|
| 3162 | CHIP1527 | STM/STY    | 1 | 1 | STM2541 | yfhF  | putative repressor      | STY2787 |
| 3163 | CHIP4508 | STM/STY    | 1 | 1 | STM1983 | dsrB  | regulatory              | STY2191 |
| 3164 | CHIP4541 | STM specif | 1 | 0 | STM2231 |       | homologue of msgA;      | STY2191 |
| 3165 | CHIP4518 | STM/STY    | 1 | 1 | STM2185 | b2145 | putative                | STY2415 |
| 3166 | CHIP4495 | STM/STY    | 1 | 1 | STM0825 | ybil  | putative                | STY0862 |
| 3167 | CHIP1962 | STM/STY    | 1 | 1 | STM4450 |       | putative                | STY4789 |
| 3168 | CHIP2013 | STM/STY    | 1 | 1 | STM4523 | yjiW  | LexA regul.             | STY4880 |
| 3169 | CHIP4173 | STM/STY    | 1 | 1 | STM2923 |       | putative                | STY3048 |
| 3170 | CHIP2309 | STM/STY    | 1 | 1 | STM1369 | sufA  | putative                | STY1754 |
| 3171 | CHIP2327 | STM/STY    | 1 | 1 | STM1123 |       | putative                | STY1158 |
| 3172 | CHIP2359 | STM/STY    | 1 | 1 | STM1377 | lpp   | murein lipo             | STY1745 |
| 3173 | CHIP2496 | STM/STY    | 1 | 1 | STM3652 |       | putative                | STY4150 |
| 3174 | CHIP2521 | STM/STY    | 1 | 1 | STM3703 | yibN  | putative                | STY4092 |
| 3175 | CHIP2624 | STM/STY    | 1 | 0 | STM0037 |       | putative                | STY0045 |
| 3176 | CHIP2640 | STM/STY    | 1 | 1 | STM0071 | caiC  | crotonobet.             | STY0081 |
| 3177 | CHIP2625 | STM/STY    | 1 | 1 | STM0038 |       | putative                | STY0046 |
| 3178 | CHIP2649 | STM/STY    | 1 | 1 | STM0087 | folA  | dihydrofola             | STY0102 |
| 3179 | CHIP2651 | STM/STY    | 1 | 1 | STM0091 | pdxA  | NAD-deper               | STY0106 |
| 3180 | CHIP2644 | STM/STY    | 1 | 1 | STM0080 |       | putative                | STY0091 |
| 3181 | CHIP0995 | STM specif | 1 | 0 | STM2630 |       | Gifsy-1 prophage        |         |
| 3182 | CHIP2809 | STM/STY    | 1 | 1 | STM1632 |       | putative                | STY1439 |
| 3183 | CHIP2842 | STM/STY    | 1 | 1 | STM1689 | pspB  | phage sho               | STY1372 |
| 3184 | CHIP2835 | STM/STY    | 1 | 1 | STM1673 |       | putative                | STY1391 |
| 3185 | CHIP2805 | STM specif | 1 | 0 | STM1628 |       | putative cytoplasmic    |         |
| 3186 | CHIP3184 | STM/STY    | 1 | 1 | STM3196 | yqiC  | putative                | STY3375 |
| 3187 | CHIP1067 | STM specif | 1 | 0 | PSLT044 |       | putative integrase      |         |
| 3188 | CHIP1060 | STM specif | 1 | 0 | PSLT028 | ccdB  | toxin addiction system: |         |
| 3189 | CHIP1100 | STM specif | 1 | 0 | PSLT091 | traW  | conjugative transfer:   |         |
| 3190 | CHIP0654 | STM specif | 1 | 0 | PSLT037 | spvD  | Salmonella plasmid vir  |         |
| 3191 | CHIP1077 | STM specif | 1 | 0 | PSLT063 |       | putative cytoplasmic    |         |
| 3192 | CHIP1109 | STM specif | 1 | 0 | PSLT100 | traH  | conjugative transfer:   |         |
| 3193 | CHIP4892 | none       | 0 | 0 | R460037 | ardB  |                         |         |
| 3194 | CHIP4893 | none       | 0 | 0 | R460038 | mucA  |                         |         |
| 3195 | CHIP4880 | none       | 0 | 0 | R460015 | traD  |                         |         |
| 3196 | CHIP4887 | none       | 0 | 0 | R460032 | ardA  |                         |         |
| 3197 | CHIP4874 | none       | 0 | 0 | R460009 | korA  |                         |         |
| 3198 | CHIP4750 | STM/STY    | 1 | 0 | PSLT010 | srgB  | sdiA-regulated gene;    |         |
| 3199 | CHIP4826 | STM specif | 0 | 0 |         |       |                         |         |
| 3200 | CHIP4830 | STM specif | 0 | 0 |         |       |                         |         |
| 3201 | CHIP4834 | STM specif | 0 | 0 |         |       |                         |         |
| 3202 | CHIP4838 | STM specif | 0 | 0 |         |       |                         |         |
| 3203 | CHIP4842 | STM specif | 1 | 0 | STM0922 |       | Fels-1 prophage; putat  |         |
| 3204 | CHIP4846 | STM/STY    | 1 | 1 | STM3113 | nupG  | MFS family              | STY3268 |
| 3205 | CHIP4926 | STY specif | 0 | 1 |         |       |                         | STY0311 |
| 3206 | CHIP4942 | STY specif | 0 | 1 |         |       |                         | STY0350 |
| 3207 | CHIP4958 | STY specif | 0 | 1 |         |       |                         | STY1018 |
| 3208 | CHIP4974 | STY specif | 0 | 1 |         |       |                         | STY1045 |
| 3209 | CHIP4989 | STY specif | 0 | 1 |         |       |                         | STY1061 |
| 3210 | CHIP5097 | STY specif | 0 | 1 |         |       |                         | STY2036 |
| 3211 | CHIP4944 | STM/STY    | 0 | 1 |         |       |                         | STY0476 |
| 3212 | CHIP4960 | STY specif | 0 | 1 |         |       |                         | STY1020 |
| 3213 | CHIP4976 | STY specif | 0 | 0 |         |       |                         | STY1047 |

|      |          |            |   |   |              |                             |
|------|----------|------------|---|---|--------------|-----------------------------|
| 3214 | CHIP4991 | STY specif | 0 | 1 |              | STY1063                     |
| 3215 | CHIP5099 | STY specif | 0 | 0 |              | STY2039                     |
| 3216 | CHIP5114 | STY specif | 0 | 1 |              | STY2055                     |
| 3217 | CHIP5049 | STY specif | 0 | 1 |              | STY1625                     |
| 3218 | CHIP5064 | STM/STY    | 0 | 1 |              | STY1672                     |
| 3219 | CHIP5080 | STY specif | 0 | 0 |              | STY2016                     |
| 3220 | CHIP5093 | STY specif | 0 | 1 |              | STY2032                     |
| 3221 | CHIP5116 | STY specif | 0 | 1 |              | STY2057                     |
| 3222 | CHIP5132 | STY specif | 0 | 1 |              | STY2073                     |
| 3223 | CHIP5066 | STY specif | 0 | 1 |              | STY1760                     |
| 3224 | CHIP4995 | STY specif | 0 | 1 |              | STY1067                     |
| 3225 | CHIP5103 | STY specif | 0 | 1 |              | STY2043                     |
| 3226 | CHIP5118 | STY specif | 0 | 1 |              | STY2059                     |
| 3227 | CHIP5224 | STY specif | 0 | 1 |              | STY3660                     |
| 3228 | CHIP5239 | STY specif | 0 | 1 |              | STY3676                     |
| 3229 | CHIP5386 | STY specif | 0 | 1 |              | STY4654                     |
| 3230 | CHIP5396 | STY specif | 0 | 1 |              | STY4671                     |
| 3231 | CHIP5412 | STY specif | 0 | 1 |              | STY4824                     |
| 3232 | CHIP5427 | STY specif | 0 | 1 |              | STY4849                     |
| 3233 | CHIP5280 | STM/STY    | 0 | 0 |              |                             |
| 3234 | CHIP5301 | STY specif | 0 | 1 |              | STY4525                     |
| 3235 | buffer   | none       | 0 | 0 |              |                             |
| 3236 | empty    | none       | 0 | 0 |              |                             |
| 3237 | empty    | none       | 0 | 0 |              |                             |
| 3238 | empty    | none       | 0 | 0 |              |                             |
| 3239 | empty    | none       | 0 | 0 |              |                             |
| 3240 | empty    | none       | 0 | 0 |              |                             |
| 3241 | CHIP0850 | STM/STY    | 1 | 1 | STM1227 pepT | putative pe STY1267         |
| 3242 | CHIP2665 | STM/STY    | 1 | 1 | STM0126 murD | UDP-N-ac $\epsilon$ STY0146 |
| 3243 | CHIP2681 | STM specif | 1 | 0 | STM0159      | putative restriction end    |
| 3244 | CHIP2697 | STM/STY    | 1 | 1 | STM0182 panB | 3-methyl-2- STY0200         |
| 3245 | CHIP2721 | STM/STY    | 1 | 1 | STM0233      | putative en STY0257         |
| 3246 | CHIP2737 | STM/STY    | 1 | 1 | STM1513      | putative cy/ STY1548        |
| 3247 | CHIP2707 | STM/STY    | 1 | 1 | STM0194 fhuB | ABC super STY0221           |
| 3248 | CHIP3299 | STM/STY    | 1 | 0 | STM0660      | putative cy/ STY0705        |
| 3249 | CHIP3315 | STM/STY    | 1 | 1 | STM0696 ybfF | putative en STY0734         |
| 3250 | CHIP2572 | STM specif | 1 | 0 | STM3827 dgoT | MFS family, D-galactor      |
| 3251 | CHIP2588 | STM specif | 1 | 0 | STM3846      | putative reverse transc     |
| 3252 | CHIP2604 | STM/STY    | 1 | 1 | STM3879 yieN | paral putati STY3899        |
| 3253 | CHIP2582 | STM/STY    | 1 | 0 | STM3841      | putative inner membra       |
| 3254 | CHIP2598 | STM/STY    | 1 | 1 | STM3860      | putative dir STY3923        |
| 3255 | CHIP2614 | STM/STY    | 1 | 1 | STM0014      | putative tra STY0014        |
| 3256 | CHIP0847 | STM/STY    | 1 | 1 | STM2399 pgtP | Phosphogl/ STY2637          |
| 3257 | CHIP0863 | STM/STY    | 1 | 1 | STM0775 galT | galactose- STY0808          |
| 3258 | CHIP2670 | STM/STY    | 1 | 1 | STM0137 mutT | 7,8-dihydro STY0157         |
| 3259 | CHIP4080 | STM/STY    | 0 | 0 |              |                             |
| 3260 | CHIP3808 | STM/STY    | 1 | 1 | STM1085 yccA | putative TE STY1112         |
| 3261 | CHIP2384 | STM/STY    | 1 | 1 | STM3402 yrdC | putative tra STY4395        |
| 3262 | CHIP2400 | STM/STY    | 1 | 1 | STM3458 yheR | putative N/ STY4340         |
| 3263 | CHIP2416 | STM/STY    | 1 | 1 | STM3496 yrfG | putative hy STY4300         |
| 3264 | CHIP3880 | STM/STY    | 1 | 1 | STM1252      | putative cy/ STY1869        |
| 3265 | CHIP2394 | STM/STY    | 1 | 1 | STM3450 yheM | putative ox STY4348         |

|      |          |            |   |   |         |       |                          |         |
|------|----------|------------|---|---|---------|-------|--------------------------|---------|
| 3266 | CHIP2410 | STM/STY    | 1 | 1 | STM3487 | aroK  | shikimate k              | STY4309 |
| 3267 | CHIP3874 | STM/STY    | 1 | 1 | STM1233 | ycfC  | membrane                 | STY1273 |
| 3268 | CHIP3890 | STM/STY    | 1 | 1 | STM1275 | yaoF  | putative he              | STY1843 |
| 3269 | CHIP4003 | STM/STY    | 1 | 1 | STM2104 | cpsG  | phosphom:                | STY2316 |
| 3270 | CHIP4019 | STM/STY    | 1 | 1 | STM2133 |       | putative cyf             | STY2346 |
| 3271 | CHIP2444 | STM/STY    | 1 | 1 | STM3537 | glgX  | glycosyl hy              | STY4273 |
| 3272 | CHIP2460 | STM/STY    | 1 | 1 | STM3574 | yhhM  | putative inr             | STY4237 |
| 3273 | CHIP4021 | STM/STY    | 1 | 1 | STM2135 |       | putative inr             | STY2348 |
| 3274 | CHIP4037 | STM specil | 1 | 0 | STM2724 |       | Fels-2 prophage: hypo    |         |
| 3275 | CHIP3765 | STM/STY    | 1 | 1 | STM0296 |       | putative cyf             | STY0328 |
| 3276 | CHIP3781 | STM specil | 1 | 0 | STM0328 |       | putative permease        |         |
| 3277 | CHIP4015 | STM/STY    | 1 | 1 | STM2124 | alkA  | 3-methyl-a               | STY2337 |
| 3278 | CHIP4031 | STM/STY    | 0 | 0 |         |       |                          |         |
| 3279 | CHIP4055 | STM specil | 1 | 0 | STM2748 |       | putative transcriptional |         |
| 3280 | CHIP3783 | STM specil | 1 | 0 | STM0330 |       | putative 3-isopropylma   |         |
| 3281 | CHIP3799 | STM/STY    | 1 | 1 | STM1064 | pqiB  | paraquat-ir              | STY1085 |
| 3282 | CHIP2375 | STM/STY    | 1 | 1 | STM1475 | rstA  | response r               | STY1647 |
| 3283 | CHIP3433 | STM/STY    | 1 | 1 | STM0884 |       | putative inr             | STY0917 |
| 3284 | CHIP3449 | STM specil | 1 | 0 | STM0905 |       | Fels-1 prophage          |         |
| 3285 | CHIP3465 | STM specil | 0 | 0 |         |       |                          |         |
| 3286 | CHIP3105 | STM/STY    | 1 | 1 | STM2528 |       | putative dir             | STY2773 |
| 3287 | CHIP3121 | STM/STY    | 1 | 1 | STM2562 | yfhA  | putative tra             | STY2809 |
| 3288 | CHIP3522 | STM specil | 1 | 0 | STM1031 |       | Gifsy-2 prophage         |         |
| 3289 | CHIP3491 | STM/STY    | 1 | 1 | STM0970 | pflA  | pyruvate fo              | STY0968 |
| 3290 | CHIP3507 | STM/STY    | 1 | 1 | STM0995 | ycbB  | putative pe              | STY0997 |
| 3291 | CHIP4108 | STM/STY    | 1 | 1 | STM4061 | yiiP  | putative C               | STY3810 |
| 3292 | CHIP3564 | STM/STY    | 1 | 1 | STM4224 | yjbG  | putative pe              | STY4420 |
| 3293 | CHIP4164 | STM/STY    | 1 | 0 | STM2910 |       | putative cyf             | STY3034 |
| 3294 | CHIP3612 | STM/STY    | 1 | 1 | STM4342 | frdB  | fumarate r               | STY4702 |
| 3295 | CHIP3470 | STM specil | 1 | 0 | STM0927 |       | Fels-1 prophage; putat   |         |
| 3296 | CHIP3494 | STM/STY    | 1 | 1 | STM0974 | focA  | putative F               | STY0974 |
| 3297 | CHIP3510 | STM/STY    | 1 | 1 | STM1005 |       | Gifsy-2 pro              | STY1011 |
| 3298 | CHIP3535 | STM/STY    | 1 | 1 | STM4188 | methH | B12-depen                | STY4405 |
| 3299 | CHIP4127 | STM specil | 1 | 0 | STM4102 |       | putative inner membra    |         |
| 3300 | CHIP3575 | STM/STY    | 1 | 1 | STM4253 |       | putative ou              | STY4449 |
| 3301 | CHIP3673 | STM/STY    | 1 | 1 | STM4467 |       | putative ar              | STY4805 |
| 3302 | CHIP3017 | STM/STY    | 1 | 1 | STM2334 | yfbT  | putative ph              | STY2564 |
| 3303 | CHIP3033 | STM/STY    | 1 | 1 | STM2361 |       | putative re              | STY2591 |
| 3304 | CHIP2285 | STM/STY    | 1 | 1 | STM1208 | ycfN  | putative cyf             | STY1248 |
| 3305 | CHIP0226 | STM specil | 1 | 0 | STM3121 |       | putative transcriptional |         |
| 3306 | CHIP2333 | STM/STY    | 1 | 1 | STM1165 | grxB  | glutaredoxi              | STY1203 |
| 3307 | CHIP0252 | STM/STY    | 1 | 1 | STM4159 | thiH  | deoxyxyluk               | STY3726 |
| 3308 | CHIP2351 | STM/STY    | 1 | 1 | STM1320 | ydjN  | part of a ki             | STY1791 |
| 3309 | CHIP3620 | STM/STY    | 1 | 1 | STM4356 | yjeF  | putative su              | STY4713 |
| 3310 | CHIP2964 | STM specil | 1 | 0 | STM2005 |       | putative endoprotease    |         |
| 3311 | CHIP2980 | STM/STY    | 1 | 1 | STM2261 | napF  | ferredoxin-              | STY2487 |
| 3312 | CHIP2996 | STM/STY    | 1 | 1 | STM2291 | yfaW  | paral putati             | STY2521 |
| 3313 | CHIP2966 | STM specil | 1 | 0 | STM2007 |       | putative TPR repeat pr   |         |
| 3314 | CHIP2982 | STM/STY    | 1 | 1 | STM2263 | yojI  | putative AE              | STY2489 |
| 3315 | CHIP2998 | STM/STY    | 1 | 1 | STM2294 | yfaZ  | putative inr             | STY2524 |
| 3316 | CHIP3014 | STM/STY    | 1 | 1 | STM2331 | yfbQ  | putative ar              | STY2561 |
| 3317 | CHIP3038 | STM/STY    | 1 | 1 | STM2369 | usg   | putative as              | STY2600 |



|      |          |            |   |   |         |       |                          |         |
|------|----------|------------|---|---|---------|-------|--------------------------|---------|
| 3318 | CHIP2298 | STM/STY    | 1 | 1 | STM1313 | celB  | PTS family               | STY1800 |
| 3319 | CHIP0561 | STM/STY    | 1 | 1 | STM1414 | ssaV  | Secretion                | STY1706 |
| 3320 | CHIP1412 | STM/STY    | 1 | 1 | STM3876 | asnC  | transcriptio             | STY3902 |
| 3321 | CHIP1340 | STM/STY    | 1 | 1 | STM0302 | safD  | putative fir             | STY0337 |
| 3322 | CHIP1356 | STM/STY    | 1 | 1 | STM0230 | rnhB  | RNAse HII                | STY0253 |
| 3323 | CHIP1476 | STM/STY    | 1 | 1 | STM4234 | ubiA  | p-hydroxyb               | STY4430 |
| 3324 | CHIP1492 | STM/STY    | 1 | 1 | STM2388 | yfcX  | paral putati             | STY2620 |
| 3325 | CHIP1390 | STM/STY    | 1 | 1 | STM0131 | ftsQ  | cell divisior            | STY0151 |
| 3326 | CHIP3907 | STM/STY    | 1 | 1 | STM1304 | astA  | arginine su              | STY1810 |
| 3327 | CHIP3931 | STM specil | 1 | 0 | STM1353 | ydiR  | putative electron transf |         |
| 3328 | CHIP3947 | STM/STY    | 1 | 1 | STM1374 | ynhA  | putative Su              | STY1749 |
| 3329 | CHIP0540 | STM/STY    | 1 | 1 | STM1574 | smvA  | Methyl violk             | STY1491 |
| 3330 | CHIP0564 | STM/STY    | 1 | 1 | STM1417 | ssaP  | Secretion                | STY1703 |
| 3331 | CHIP0566 | STM/STY    | 1 | 1 | STM0400 | proY  | putative AF              | STY0438 |
| 3332 | CHIP1329 | STM/STY    | 1 | 1 | STM2255 | napC  | periplasmic              | STY2481 |
| 3333 | CHIP1441 | STM/STY    | 1 | 1 | STM2572 | yfhH  | putative AE              | STY2818 |
| 3334 | CHIP1369 | STM/STY    | 1 | 1 | STM2070 | yeeZ  | putative de              | STY2279 |
| 3335 | CHIP1385 | STM/STY    | 1 | 1 | STM0105 | yabl  | putative De              | STY0122 |
| 3336 | CHIP1409 | STM/STY    | 1 | 1 | STM0144 | ppdD  | putative m:              | STY0166 |
| 3337 | CHIP1516 | STM/STY    | 1 | 1 | STM2272 | gyrA  | DNA gyras                | STY2499 |
| 3338 | CHIP1540 | STM/STY    | 1 | 1 | STM2444 | cysP  | ABC super                | STY2681 |
| 3339 | CHIP1017 | STM/STY    | 1 | 1 | STM0829 | glnP  | ABC super                | STY0867 |
| 3340 | CHIP1033 | STM/STY    | 1 | 1 | STM2015 | erfK  | putative pe              | STY2218 |
| 3341 | CHIP1596 | STM/STY    | 1 | 1 | STM0592 | fepD  | ABC super                | STY0636 |
| 3342 | CHIP3144 | STM specil | 1 | 0 | STM2600 |       | Gifsy-1 prophage: simi   |         |
| 3343 | CHIP3154 | STM specil | 1 | 0 | STM2610 |       | Gifsy-1 prophage         |         |
| 3344 | CHIP2030 | STM/STY    | 1 | 1 | STM3749 | yicl  | putative al:             | STY4044 |
| 3345 | CHIP2046 | STM/STY    | 1 | 1 | STM3630 | dppA  | ABC super                | STY4168 |
| 3346 | CHIP2062 | STM/STY    | 1 | 1 | STM3557 | ugpB  | ABC super                | STY4254 |
| 3347 | CHIP2078 | STM/STY    | 1 | 1 | STM0952 |       | putative tra             | STY0950 |
| 3348 | CHIP1535 | STM/STY    | 1 | 1 | STM2519 | engA  | putative G               | STY2764 |
| 3349 | CHIP1561 | STM/STY    | 1 | 1 | STM0477 | acrR  | acrAB ope                | STY0521 |
| 3350 | CHIP1585 | STM/STY    | 1 | 1 | STM0514 | ybbS  | putative tra             | STY0562 |
| 3351 | CHIP1993 | STM/STY    | 1 | 1 | STM4399 | ytfE  | putative ce              | STY4757 |
| 3352 | CHIP2009 | STM/STY    | 1 | 1 | STM4508 | trpS2 | putative try             | STY4863 |
| 3353 | CHIP2025 | STM/STY    | 1 | 1 | STM4581 | yjjK  | putative AE              | STY4928 |
| 3354 | CHIP2041 | STM/STY    | 1 | 1 | STM3659 | yiaB  | putative inr             | STY4139 |
| 3355 | CHIP3199 | STM/STY    | 1 | 1 | STM3235 | yhaJ  | putative tra             | STY3415 |
| 3356 | CHIP2075 | STM/STY    | 1 | 1 | STM3483 | rpe   | D-ribulose-              | STY4313 |
| 3357 | CHIP0585 | STM/STY    | 1 | 1 | STM3835 | gyrB  | DNA gyras                | STY3943 |
| 3358 | CHIP0697 | STM/STY    | 1 | 1 | STM2077 | hisF  | imidazole                | STY2286 |
| 3359 | CHIP0625 | STM/STY    | 1 | 1 | STM0413 | tsx   | nucleoside               | STY0451 |
| 3360 | CHIP0641 | STM/STY    | 1 | 1 | STM1707 | pyrF  | orotidine-5'             | STY1344 |
| 3361 | CHIP1886 | STM/STY    | 1 | 1 | STM3408 | sun   | putative rR              | STY4389 |
| 3362 | CHIP0596 | STM/STY    | 1 | 1 | STM3486 | aroB  | dehydroqui               | STY4310 |
| 3363 | CHIP0708 | STM/STY    | 1 | 1 | STM1960 | fliD  | flagellar bic            | STY2168 |
| 3364 | CHIP0724 | STM/STY    | 1 | 1 | STM2581 | rnc   | RNAse III,               | STY2827 |
| 3365 | CHIP0748 | STM/STY    | 1 | 1 | STM2463 | eutE  | putative alc             | STY2700 |
| 3366 | CHIP1799 | STM/STY    | 1 | 1 | STM3993 | mobB  | molybdopt                | STY3887 |
| 3367 | CHIP0631 | STM/STY    | 1 | 1 | STM2893 | invI  | surface pre              | STY3016 |
| 3368 | CHIP0743 | STM/STY    | 1 | 1 | STM1241 | msgA  | Macrophag                | STY1883 |
| 3369 | CHIP0767 | STM/STY    | 1 | 1 | STM2885 | sipB  | cell invasio             | STY3008 |

|      |          |         |   |   |              |                         |         |
|------|----------|---------|---|---|--------------|-------------------------|---------|
| 3370 | CHIP1826 | STM/STY | 1 | 1 | STM0870      | putative tra            | STY0903 |
| 3371 | CHIP1858 | STM/STY | 1 | 1 | STM0847 ybiK | putative as             | STY0886 |
| 3372 | CHIP1890 | STM/STY | 1 | 1 | STM3473 yhfC | putative Mf             | STY4323 |
| 3373 | CHIP0186 | STM/STY | 1 | 1 | STM2047 pduL | Propanedic              | STY2252 |
| 3374 | CHIP1229 | STM/STY | 1 | 1 | STM4288 phnB | putative cyf            | STY4487 |
| 3375 | CHIP1245 | STM/STY | 1 | 1 | STM1899 yebC | putative cyf            | STY2107 |
| 3376 | CHIP1269 | STM/STY | 1 | 1 | STM3365 yhcQ | putative mε             | STY3546 |
| 3377 | CHIP1293 | STM/STY | 1 | 1 | STM0043 rpsT | 30S riboso              | STY0052 |
| 3378 | CHIP4674 | STM/STY | 1 | 1 | STM0269      | putative cyf            | STY0290 |
| 3379 | CHIP4700 | STM/STY | 1 | 1 | STM1643      | putative inr            | STY1426 |
| 3380 | CHIP0141 | STM/STY | 1 | 0 | STM4020 yihR | putative alc            | STY3858 |
| 3381 | CHIP0165 | STM/STY | 1 | 1 | STM0800 slrP | leucine-ricf            | STY0833 |
| 3382 | CHIP0189 | STM/STY | 1 | 1 | STM2050 pduO | Propanedic              | STY2255 |
| 3383 | CHIP1232 | STM/STY | 1 | 1 | STM4298 melA | alpha-galac             | STY4497 |
| 3384 | CHIP1248 | STM/STY | 1 | 1 | STM1906 yecP | putative en             | STY2114 |
| 3385 | CHIP0415 | STM/STY | 1 | 1 | STM2062 dacD | DD-carbox               | STY2268 |
| 3386 | CHIP0439 | STM/STY | 1 | 1 | STM4259      | putative AE             | STY4456 |
| 3387 | CHIP1290 | STM/STY | 1 | 1 | STM2686 yfjF | putative cyf            | STY2872 |
| 3388 | CHIP1306 | STM/STY | 1 | 1 | STM0045 ribF | flavokinase             | STY0054 |
| 3389 | CHIP0104 | STM/STY | 1 | 1 | STM4451 nrdG | anaerobic i             | STY4790 |
| 3390 | CHIP4703 | STM/STY | 0 | 1 | STM1528      | putative ou             | STY1533 |
| 3391 | CHIP0064 | STM/STY | 1 | 1 | STM3918 rfe  | undecaprei              | STY3637 |
| 3392 | CHIP0026 | STM/STY | 1 | 1 | STM3961 pldB | lysophosph              | STY3598 |
| 3393 | CHIP1743 | STM/STY | 1 | 1 | STM2980 ygdE | putative S <sup>A</sup> | STY3120 |
| 3394 | CHIP0090 | STM/STY | 1 | 1 | STM4149 rplK | 50 S ribosc             | STY3736 |
| 3395 | CHIP0874 | STM/STY | 1 | 1 | STM1180 flgH | flagellar bic           | STY1219 |
| 3396 | CHIP0890 | STM/STY | 1 | 1 | STM3476 nirC | FNT family              | STY4320 |
| 3397 | CHIP0900 | STM/STY | 1 | 1 | STM3360 argR | repressor c             | STY3540 |
| 3398 | CHIP1751 | STM/STY | 1 | 1 | STM2954 mazG | putative py             | STY3083 |
| 3399 | CHIP1775 | STM/STY | 1 | 1 | STM4092 hslV | peptidase c             | STY3778 |
| 3400 | CHIP0005 | STM/STY | 1 | 1 | STM3983 fadB | 3-hydroxya              | STY3577 |
| 3401 | CHIP0021 | STM/STY | 1 | 1 | STM3966      | putative arj            | STY3593 |
| 3402 | CHIP0037 | STM/STY | 1 | 1 | STM3950 yigB | putative hy             | STY3609 |
| 3403 | CHIP0047 | STM/STY | 1 | 1 | STM3939 cyaA | adenylate c             | STY3620 |
| 3404 | CHIP2290 | STM/STY | 1 | 1 | STM1266      | putative tra            | STY1855 |
| 3405 | CHIP0095 | STM/STY | 1 | 1 | STM4154 rpoC | RNA polym               | STY3731 |
| 3406 | CHIP0879 | STM/STY | 1 | 1 | STM1700 fabI | enoyl-[acyl-            | STY1352 |
| 3407 | CHIP0895 | STM/STY | 1 | 1 | STM1918 cheR | glutamate i             | STY2127 |
| 3408 | CHIP1746 | STM/STY | 1 | 1 | STM2964 yqcB | putative syf            | STY3103 |
| 3409 | CHIP1125 | STM/STY | 1 | 1 | STM0886      | putative su             | STY0919 |
| 3410 | CHIP4409 | STM/STY | 1 | 1 | STM0517 gcl  | glyoxylate c            | STY0565 |
| 3411 | CHIP1165 | STM/STY | 1 | 1 | STM0997 ycbL | putative Mε             | STY0999 |
| 3412 | CHIP1189 | STM/STY | 1 | 1 | STM1579 narW | nitrate red.            | STY1486 |
| 3413 | CHIP4473 | STM/STY | 1 | 1 | STM0336 stbE | putative fir            | STY0369 |
| 3414 | CHIP2857 | STM/STY | 1 | 1 | STM1734 yciC | putative inr            | STY1317 |
| 3415 | CHIP2875 | STM/STY | 1 | 1 | STM1783 pth  | peptidyl-tRf            | STY1909 |
| 3416 | CHIP2891 | STM/STY | 1 | 1 | STM1818 fadD | acyl-CoA s              | STY1948 |
| 3417 | CHIP2907 | STM/STY | 1 | 1 | STM1848 yebS | putative inr            | STY1979 |
| 3418 | CHIP2923 | STM/STY | 1 | 1 | STM1877      | putative an             | STY2083 |
| 3419 | CHIP4388 | STM/STY | 1 | 1 | STM0478 aefA | putative sr             | STY0522 |
| 3420 | CHIP1144 | STM/STY | 1 | 1 | STM0612      | putative hy             | STY0660 |
| 3421 | CHIP1146 | STM/STY | 1 | 1 | STM0625 dpiB | sensory his             | STY0674 |

|      |          |            |   |   |         |      |                        |         |
|------|----------|------------|---|---|---------|------|------------------------|---------|
| 3422 | CHIP1162 | STM/STY    | 1 | 1 | STM0984 | msbA | ABC super              | STY0985 |
| 3423 | CHIP4462 | STM/STY    | 1 | 1 | STM0604 | ybdM | putative tra           | STY0648 |
| 3424 | CHIP1218 | STM/STY    | 1 | 1 | STM1608 | tehB | paral putati           | STY1456 |
| 3425 | CHIP2774 | STM specil | 1 | 0 | STM1572 | nmpC | new outer membrane     | STY1459 |
| 3426 | CHIP2790 | STM/STY    | 1 | 1 | STM1605 | ydcN | putative ox            | STY1459 |
| 3427 | CHIP2480 | STM/STY    | 1 | 1 | STM3615 | yhjK | putative Di            | STY4188 |
| 3428 | CHIP4616 | STM/STY    | 1 | 0 | STM3130 |      | putative cytoplasmic   | STY4097 |
| 3429 | CHIP2520 | STM/STY    | 1 | 1 | STM3698 |      | putative pe            | STY4097 |
| 3430 | CHIP4656 | STM/STY    | 1 | 1 | STM2849 | hycE | hydrogena              | STY2971 |
| 3431 | CHIP4201 | STM/STY    | 1 | 1 | STM2975 | fucP | pseudogen              | STY3115 |
| 3432 | CHIP4313 | STM/STY    | 1 | 1 | STM2691 |      | putative AE            | STY2877 |
| 3433 | CHIP4355 | STM/STY    | 1 | 1 | STM0414 | yajl | putative ou            | STY0452 |
| 3434 | CHIP4371 | STM/STY    | 1 | 1 | STM0450 | lon  | DNA-bindir             | STY0492 |
| 3435 | CHIP2467 | STM/STY    | 1 | 1 | STM3584 | nikR | nickel-resp            | STY4227 |
| 3436 | CHIP2491 | STM/STY    | 1 | 0 | STM3635 | yhjW | putative membrane-as   | STY4118 |
| 3437 | CHIP2507 | STM/STY    | 1 | 1 | STM3678 |      | putative ba            | STY4118 |
| 3438 | CHIP2523 | STM/STY    | 1 | 1 | STM3705 | yibP | paral putati           | STY4090 |
| 3439 | CHIP4334 | STM/STY    | 1 | 1 | STM0258 | yafD | putative cy            | STY0279 |
| 3440 | CHIP4350 | STM/STY    | 1 | 1 | STM0405 | tgt  | tRNA-guan              | STY0443 |
| 3441 | CHIP4278 | STM/STY    | 1 | 1 | STM3144 | hybF | putative hy            | STY3315 |
| 3442 | CHIP4582 | STM/STY    | 1 | 1 | STM2815 | emrB | putative Mf            | STY2941 |
| 3443 | CHIP2486 | STM/STY    | 1 | 1 | STM3625 | yhjV | putative Hf            | STY4173 |
| 3444 | CHIP2510 | STM/STY    | 1 | 1 | STM3681 |      | putative tra           | STY4115 |
| 3445 | CHIP2140 | STM/STY    | 1 | 1 | STM3299 | greA | transcriptio           | STY3477 |
| 3446 | CHIP2156 | STM/STY    | 1 | 1 | STM3214 | yqjH | putative tra           | STY3392 |
| 3447 | CHIP2172 | STM/STY    | 1 | 1 | STM3134 |      | putative pe            | STY3305 |
| 3448 | CHIP1621 | STM/STY    | 1 | 1 | STM2827 | alaS | alanyl-tRN             | STY2948 |
| 3449 | CHIP4521 | STM/STY    | 1 | 1 | STM2190 | mgIB | ABC super              | STY2424 |
| 3450 | CHIP4537 | STM/STY    | 1 | 1 | STM2225 |      | putative inr           | STY2462 |
| 3451 | CHIP1623 | STM/STY    | 1 | 1 | STM2839 | ygaA | putative re            | STY2961 |
| 3452 | CHIP1647 | STM/STY    | 1 | 1 | STM2217 | yejB | putative AE            | STY2453 |
| 3453 | CHIP4547 | STM specil | 1 | 0 | STM2238 |      | putative phage protein | STY2392 |
| 3454 | CHIP4563 | STM/STY    | 1 | 1 | STM2162 | yehW | putative AE            | STY2392 |
| 3455 | CHIP1895 | STM/STY    | 1 | 1 | STM0934 | ltaA | L-allo-threc           | STY0930 |
| 3456 | CHIP1911 | STM/STY    | 1 | 1 | STM3430 | rplN | 50S riboso             | STY4368 |
| 3457 | CHIP1673 | STM/STY    | 1 | 1 | STM2149 | stcD | putative ou            | STY2378 |
| 3458 | CHIP4573 | STM/STY    | 1 | 1 | STM2178 |      | putative 1,2           | STY2408 |
| 3459 | CHIP1905 | STM/STY    | 1 | 1 | STM3420 | secY | preprotein             | STY4378 |
| 3460 | CHIP2113 | STM/STY    | 1 | 1 | STM3589 | pitA | PiT family,            | STY4214 |
| 3461 | CHIP2129 | STM/STY    | 1 | 1 | STM3340 | yhcK | putative re            | STY3521 |
| 3462 | CHIP1969 | STM/STY    | 1 | 1 | STM4527 | mrr  | restriction            | STY4885 |
| 3463 | CHIP1955 | STM/STY    | 1 | 1 | STM4410 | ytfN | putative pe            | STY4769 |
| 3464 | CHIP1971 | STM/STY    | 1 | 1 | STM4557 | holD | DNA polym              | STY4907 |
| 3465 | CHIP1987 | STM/STY    | 1 | 1 | STM4339 | blc  | outer mem              | STY4699 |
| 3466 | CHIP0305 | STM/STY    | 1 | 1 | STM4458 | yjgF | putative tra           | STY4798 |
| 3467 | CHIP2212 | STM/STY    | 1 | 1 | STM3253 |      | putative fru           | STY3435 |
| 3468 | CHIP0345 | STM/STY    | 1 | 1 | STM0667 | ybeX | putative CE            | STY0712 |
| 3469 | CHIP2199 | STM/STY    | 1 | 1 | STM3322 | ptsN | sugar spec             | STY3501 |
| 3470 | CHIP2215 | STM/STY    | 1 | 1 | STM3234 | yhaH | putative inr           | STY3414 |
| 3471 | CHIP0348 | STM/STY    | 1 | 1 | STM0186 | dksA | dnaK supp              | STY0211 |
| 3472 | CHIP0364 | STM/STY    | 1 | 1 | STM1403 | sscB | Secretion              | STY1717 |
| 3473 | CHIP0380 | STM/STY    | 1 | 1 | STM3044 | xerD | recombina              | STY3200 |

|      |          |            |   |   |         |            |                         |
|------|----------|------------|---|---|---------|------------|-------------------------|
| 3474 | CHIP3355 | STM specil | 1 | 0 | STM0769 |            | putative cytoplasmic pr |
| 3475 | CHIP0359 | STM/STY    | 1 | 1 | STM1398 | sseB       | Secretion s STY1722     |
| 3476 | CHIP0375 | STM/STY    | 1 | 1 | STM1090 | pipC       | Pathogenic STY1120      |
| 3477 | CHIP3334 | STM/STY    | 1 | 0 | STM0726 |            | putative gly STY0768    |
| 3478 | CHIP3366 | STM/STY    | 1 | 1 | STM0788 | hutG       | formimionc STY0821      |
| 3479 | CHIP3398 | STM/STY    | 1 | 1 | STM0832 | ybiF       | putative pe STY0871     |
| 3480 | CHIP2187 | STM/STY    | 1 | 1 | STM3049 | yqfA       | putative he STY3205     |
| 3481 | CHIP4192 | STM/STY    | 1 | 1 | STM2955 |            | putative tra STY3093    |
| 3482 | CHIP4351 | STM/STY    | 1 | 1 | STM0406 | yajC       | preprotein STY0444      |
| 3483 | CHIP4384 | STM/STY    | 1 | 1 | STM0473 | hha        | hemolysin STY0516       |
| 3484 | CHIP4284 | STM/STY    | 1 | 1 | STM3159 | exbB       | uptake of e STY3332     |
| 3485 | CHIP4207 | STM/STY    | 1 | 1 | STM2983 | ygdI       | putative lip STY3123    |
| 3486 | CHIP0490 | STM/STY    | 1 | 1 | STM1996 | cspB       | putative co STY2204     |
| 3487 | CHIP3588 | STM/STY    | 1 | 1 | STM4285 | fdhF       | formate de STY4484      |
| 3488 | CHIP3573 | STM/STY    | 1 | 1 | STM4251 | yjbR       | putative cy STY4447     |
| 3489 | CHIP3605 | STM/STY    | 1 | 1 | STM4331 | yjel       | putative ou STY4691     |
| 3490 | CHIP4503 | STM/STY    | 1 | 1 | STM1121 | ymdF       | putative cy STY1156     |
| 3491 | CHIP1044 | STM specil | 1 | 0 | STM3720 | yibR       | putative inner membra   |
| 3492 | CHIP1005 | STM/STY    | 1 | 1 | STM2299 | yfbG       | paral putati STY2529    |
| 3493 | CHIP2564 | STM/STY    | 0 | 0 | STM2252 | ccmC       | ABC super STY2478       |
| 3494 | CHIP1206 | STM/STY    | 1 | 1 | STM2732 |            | Fels-2 proç STY4639     |
| 3495 | CHIP1215 | STM/STY    | 1 | 1 | STM1616 |            | putative Su STY1448     |
| 3496 | CHIP1160 | STM/STY    | 1 | 1 | STM1526 | yneG       | putative cy STY1535     |
| 3497 | CHIP1200 | STM/STY    | 1 | 1 | STM1652 | ynaF       | putative un STY1416     |
| 3498 | CHIP1129 | STM/STY    | 1 | 1 | STM1876 | holE       | DNA polymr STY2082      |
| 3499 | CHIP1408 | STM/STY    | 1 | 1 | STM0143 | hofB       | putative int STY0165    |
| 3500 | CHIP1322 | STM/STY    | 1 | 1 | STM3792 |            | putative L-f STY3990    |
| 3501 | CHIP1411 | STM/STY    | 1 | 1 | STM3878 | yieM       | putative inr STY3900    |
| 3502 | CHIP1460 | STM/STY    | 1 | 1 | STM0417 | ribH       | riboflavin s STY0456    |
| 3503 | CHIP4252 | STM/STY    | 1 | 1 | STM3087 | yqgB       | putative inr STY3241    |
| 3504 | CHIP3576 | STM/STY    | 1 | 0 | STM4255 |            | putative cytoplasmic pr |
| 3505 | CHIP2816 | STM/STY    | 1 | 1 | STM1645 | ynbE       | putative ou STY1424     |
| 3506 | CHIP2841 | STM/STY    | 1 | 1 | STM1687 | pspD       | phage shoç STY1374      |
| 3507 | CHIP2538 | STM/STY    | 1 | 0 | STM3760 |            | putative cytoplasmic pr |
| 3508 | CHIP2903 | STM/STY    | 1 | 1 | STM1840 | yobG       | putative inr STY1970    |
| 3509 | CHIP3161 | STM specil | 1 | 0 | STM2618 |            | Gifsy-1 prophage        |
| 3510 | CHIP3338 | STM/STY    | 1 | 1 | STM0742 | ybgT       | putative ou STY0788     |
| 3511 | CHIP1083 | STM specil | 1 | 0 | PSLT069 | psiB       | Plasmid SOS inhibition  |
| 3512 | CHIP1068 | STM specil | 0 | 0 | PSLT050 |            | putative cytoplasmic pr |
| 3513 | CHIP1108 | STM specil | 1 | 0 | PSLT099 | trbB       | conjugative transfer    |
| 3514 | CHIP1053 | STM specil | 1 | 0 | PSLT006 | repA       | DNA replication         |
| 3515 | CHIP1085 | STM specil | 1 | 0 | PSLT071 |            | pseudogene; two fram    |
| 3516 | CHIP1117 | STM specil | 0 | 0 | PSLT109 |            | pseudogene; two in-fra  |
| 3517 | CHIP4898 | none       | 0 | 0 | R460049 | qacEdelta1 |                         |
| 3518 | CHIP4899 | none       | 0 | 0 | R460050 | sul1       |                         |
| 3519 | CHIP4886 | none       | 0 | 0 | R460031 | ccgAI      |                         |
| 3520 | CHIP4895 | none       | 0 | 0 | R460040 | mpr        |                         |
| 3521 | CHIP4881 | none       | 0 | 0 | R460017 | traE       |                         |
| 3522 | CHIP4751 | STM/STY    | 0 | 0 |         |            |                         |
| 3523 | CHIP4827 | STM/STY    | 1 | 1 | STM0907 |            | Fels-1 proç STY1042     |
| 3524 | CHIP4831 | STM specil | 1 | 0 | STM0911 |            | Fels-1 prophage         |
| 3525 | CHIP4835 | STM/STY    | 1 | 0 | STM2779 |            | putative inner membra   |

|      |          |            |   |   |         |                             |
|------|----------|------------|---|---|---------|-----------------------------|
| 3526 | CHIP4839 | STM/STY    | 0 | 0 |         |                             |
| 3527 | CHIP4843 | STM/STY    | 0 | 0 |         |                             |
| 3528 | CHIP4847 | STM/STY    | 0 | 0 |         |                             |
| 3529 | CHIP5021 | STY specif | 0 | 1 |         | STY1596                     |
| 3530 | CHIP5037 | STY specif | 0 | 1 |         | STY1613                     |
| 3531 | CHIP5052 | STY specif | 0 | 1 |         | STY1629                     |
| 3532 | CHIP5068 | STY specif | 0 | 1 |         | STY1879                     |
| 3533 | CHIP5082 | STY specif | 0 | 1 |         | STY2020                     |
| 3534 | CHIP5190 | STY specif | 0 | 1 |         | STY3086                     |
| 3535 | CHIP5039 | STY specif | 0 | 1 |         | STY1615                     |
| 3536 | CHIP5054 | STY specif | 0 | 1 |         | STY1631                     |
| 3537 | CHIP5070 | STY specif | 0 | 1 |         | STY1887                     |
| 3538 | CHIP5084 | STY specif | 0 | 1 |         | STY2022                     |
| 3539 | CHIP5192 | STY specif | 0 | 1 |         | STY3088                     |
| 3540 | CHIP5206 | STY specif | 0 | 1 |         | STY3287                     |
| 3541 | CHIP4962 | STY specif | 0 | 1 |         | STY1027                     |
| 3542 | CHIP4978 | STY specif | 0 | 0 |         | STY1049                     |
| 3543 | CHIP4993 | STY specif | 0 | 1 |         | STY1065                     |
| 3544 | CHIP5101 | STY specif | 0 | 1 |         | STY2041                     |
| 3545 | CHIP5208 | STY specif | 0 | 1 |         | STY3289                     |
| 3546 | CHIP5222 | STY specif | 0 | 1 |         | STY3658                     |
| 3547 | CHIP4980 | STY specif | 0 | 1 |         | STY1051                     |
| 3548 | CHIP5087 | STY specif | 0 | 1 |         | STY2026                     |
| 3549 | CHIP5196 | STY specif | 0 | 1 |         | STY3092                     |
| 3550 | CHIP5126 | STY specif | 0 | 1 |         | STY2067                     |
| 3551 | CHIP5142 | STY specif | 0 | 1 |         | STY2297                     |
| 3552 | CHIP5158 | STY specif | 0 | 1 |         | STY2364                     |
| 3553 | CHIP5308 | STY specif | 0 | 1 |         | STY4536                     |
| 3554 | CHIP5323 | STY specif | 0 | 1 |         | STY4559                     |
| 3555 | CHIP5337 | STY specif | 0 | 1 |         | STY4576                     |
| 3556 | CHIP5353 | STY specif | 0 | 1 |         | STY4593                     |
| 3557 | CHIP5286 | STY specif | 0 | 1 |         | STY4221                     |
| 3558 | CHIP5309 | STY specif | 0 | 1 |         | STY4539                     |
| 3559 | buffer   | none       | 0 | 0 |         |                             |
| 3560 | empty    | none       | 0 | 0 |         |                             |
| 3561 | empty    | none       | 0 | 0 |         |                             |
| 3562 | empty    | none       | 0 | 0 |         |                             |
| 3563 | empty    | none       | 0 | 0 |         |                             |
| 3564 | empty    | none       | 0 | 0 |         |                             |
| 3565 | CHIP2641 | STM/STY    | 1 | 1 | STM0072 | caiB l-carnitine c STY0082  |
| 3566 | CHIP3241 | STM/STY    | 1 | 1 | STM3315 | yrbH putative po STY3494    |
| 3567 | CHIP3257 | STM/STY    | 1 | 1 | STM3354 | putative tar STY3534        |
| 3568 | CHIP3273 | STM/STY    | 1 | 0 | STM3388 | putative mε STY3568         |
| 3569 | CHIP3297 | STM specif | 1 | 0 | STM0658 | ybeV putative molecular cha |
| 3570 | CHIP3313 | STM/STY    | 1 | 1 | STM0692 | putative tra STY0730        |
| 3571 | CHIP2715 | STM/STY    | 1 | 1 | STM0220 | dxr 1-deoxy-D- STY0243      |
| 3572 | CHIP2731 | STM/STY    | 1 | 1 | STM1505 | rspA putative de STY1556    |
| 3573 | CHIP2747 | STM/STY    | 1 | 1 | STM1536 | putative hy STY1527         |
| 3574 | CHIP0789 | STM/STY    | 1 | 1 | STM4455 | treR transcriptio STY4795   |
| 3575 | CHIP0805 | STM/STY    | 1 | 0 | STM2033 | cbiC synthesis c STY2238    |
| 3576 | CHIP2612 | STM/STY    | 1 | 1 | STM0007 | talB transaldola STY0007    |
| 3577 | CHIP0799 | STM/STY    | 1 | 1 | STM1724 | trpD anthranilatε STY1327   |

|      |          |            |   |   |         |      |                          |         |
|------|----------|------------|---|---|---------|------|--------------------------|---------|
| 3578 | CHIP0815 | STM/STY    | 1 | 1 | STM2023 | cbiM | synthesis c              | STY2226 |
| 3579 | CHIP0831 | STM/STY    | 1 | 1 | STM1726 | trpB | tryptophan               | STY1325 |
| 3580 | CHIP2638 | STM specil | 1 | 0 | STM0065 |      | putative viral protein   |         |
| 3581 | CHIP2654 | STM/STY    | 1 | 1 | STM0096 | hepA | RNA polym                | STY0111 |
| 3582 | CHIP3246 | STM/STY    | 1 | 1 | STM3333 |      | putative pu              | STY3513 |
| 3583 | CHIP3792 | STM specil | 1 | 0 | STM1050 |      | Gifsy-2 prophage; tail f |         |
| 3584 | CHIP3816 | STM/STY    | 1 | 1 | STM1096 | copR | Copper res               | STY1128 |
| 3585 | CHIP3832 | STM/STY    | 1 | 1 | STM1129 |      | putative inr             | STY1166 |
| 3586 | CHIP3848 | STM/STY    | 1 | 1 | STM1167 | rimJ | acetylation              | STY1205 |
| 3587 | CHIP3864 | STM/STY    | 1 | 1 | STM1210 | ycfP | putative es              | STY1250 |
| 3588 | CHIP3888 | STM/STY    | 1 | 1 | STM1273 |      | putative nit             | STY1848 |
| 3589 | CHIP3842 | STM/STY    | 1 | 1 | STM1155 | htrB | lauroyl/myr              | STY1192 |
| 3590 | CHIP3858 | STM/STY    | 1 | 1 | STM1202 | ycfH | putative mε              | STY1241 |
| 3591 | CHIP2434 | STM/STY    | 1 | 1 | STM3526 | glpD | sn-glycerol              | STY4277 |
| 3592 | CHIP2450 | STM/STY    | 1 | 1 | STM3551 | ggt  | gamma-glu                | STY4260 |
| 3593 | CHIP3715 | STM/STY    | 1 | 1 | STM4542 | yjjA | putative ou              | STY4895 |
| 3594 | CHIP3731 | STM/STY    | 1 | 0 | STM4584 | yjjX | putative cy              | STY4931 |
| 3595 | CHIP3892 | STM/STY    | 1 | 1 | STM1277 | yeaO | putative cy              | STY1841 |
| 3596 | CHIP3717 | STM/STY    | 1 | 1 | STM4546 | yjjP | paral putati             | STY4899 |
| 3597 | CHIP3733 | STM/STY    | 1 | 1 | STM4586 | rob  | transcriptio             | STY4933 |
| 3598 | CHIP3749 | STM/STY    | 1 | 1 | STM0274 |      | putative cy              | STY0298 |
| 3599 | CHIP4061 | STM specil | 1 | 0 | STM2754 |      | putative hexulose 6 ph   |         |
| 3600 | CHIP4077 | STM/STY    | 1 | 1 | STM2775 | iroD | Similar to ε             | STY2892 |
| 3601 | CHIP3727 | STM specil | 1 | 0 | STM4573 | stjC | putative fimbrial chapa  |         |
| 3602 | CHIP3751 | STM specil | 1 | 0 | STM0277 |      | putative cytoplasmic pr  |         |
| 3603 | CHIP3767 | STM specil | 1 | 0 | STM0299 | safA | putative outer membra    |         |
| 3604 | CHIP4079 | STM/STY    | 1 | 1 | STM2777 | iroN | TonB-depe                | STY2894 |
| 3605 | CHIP4095 | STM/STY    | 1 | 0 | STM4008 |      | putative cytoplasmic pr  |         |
| 3606 | CHIP3823 | STM/STY    | 1 | 1 | STM1106 | hpal | 4-hydroxyp               | STY1140 |
| 3607 | CHIP3057 | STM/STY    | 1 | 1 | STM2405 |      | putative thi             | STY2646 |
| 3608 | CHIP3073 | STM/STY    | 1 | 0 | STM2449 |      | putative ac              | STY2686 |
| 3609 | CHIP3089 | STM/STY    | 1 | 1 | STM2490 | gcvR | transcriptio             | STY2728 |
| 3610 | CHIP3489 | STM/STY    | 1 | 1 | STM0968 | ycaD | putative Mf              | STY0966 |
| 3611 | CHIP3505 | STM/STY    | 1 | 1 | STM0993 | mukE | putative ch              | STY0995 |
| 3612 | CHIP4098 | STM/STY    | 0 | 0 |         |      |                          | STY3863 |
| 3613 | CHIP3115 | STM/STY    | 1 | 1 | STM2545 |      | putative rR              | STY2791 |
| 3614 | CHIP3131 | STM specil | 1 | 0 | STM2587 |      | Gifsy-1 prophage: simi   |         |
| 3615 | CHIP4116 | STM/STY    | 1 | 1 | STM4079 | yneC | putative inr             | STY3791 |
| 3616 | CHIP4140 | STM/STY    | 1 | 1 | STM4118 | yijP | putative Int             | STY3755 |
| 3617 | CHIP3596 | STM/STY    | 1 | 1 | STM4308 |      | putative co              | STY4509 |
| 3618 | CHIP4188 | STM specil | 1 | 0 | STM2943 |      | putative cytoplasmic pr  |         |
| 3619 | CHIP3094 | STM/STY    | 1 | 1 | STM2503 |      | putative diç             | STY2744 |
| 3620 | CHIP3118 | STM/STY    | 1 | 1 | STM2558 | cadB | APC family               | STY2805 |
| 3621 | CHIP3134 | STM specil | 0 | 0 |         |      |                          |         |
| 3622 | CHIP4111 | STM/STY    | 1 | 1 | STM4068 |      | putative reç             | STY3802 |
| 3623 | CHIP4135 | STM specil | 1 | 0 | STM4113 | frwB | PTS system fructose-li   |         |
| 3624 | CHIP4151 | STM/STY    | 1 | 1 | STM2857 | hypD | putative hy              | STY2979 |
| 3625 | CHIP3681 | STM specil | 1 | 0 | STM4490 |      | putative Mrr restriction |         |
| 3626 | CHIP3697 | STM/STY    | 1 | 1 | STM4515 | yjiJ | putative su              | STY4872 |
| 3627 | CHIP0194 | STM/STY    | 1 | 0 | STM2055 | pduU | Propanedic               | STY2260 |
| 3628 | CHIP2293 | STM/STY    | 1 | 1 | STM1271 | yeaR | putative cy              | STY1850 |
| 3629 | CHIP2317 | STM/STY    | 1 | 1 | STM1483 | ydgE | putative mε              | STY1584 |

|      |          |            |   |   |         |      |                          |         |
|------|----------|------------|---|---|---------|------|--------------------------|---------|
| 3630 | CHIP2341 | STM/STY    | 1 | 1 | STM1234 | trmU | tRNA (5-m                | STY1274 |
| 3631 | CHIP2335 | STM/STY    | 1 | 1 | STM1213 | ycfQ | putative tra             | STY1253 |
| 3632 | CHIP0276 | STM/STY    | 1 | 0 | STM3478 | bigA | putative su              | STY4318 |
| 3633 | CHIP2948 | STM/STY    | 1 | 1 | STM1940 |      | putative ce              | STY2149 |
| 3634 | CHIP3644 | STM specil | 1 | 0 | STM4417 |      | putative transcriptional |         |
| 3635 | CHIP3660 | STM specil | 1 | 0 | STM4434 |      | putative permease        |         |
| 3636 | CHIP3676 | STM specil | 1 | 0 | STM4484 | idnD | L-idonate 5-dehydroge    |         |
| 3637 | CHIP3646 | STM specil | 1 | 0 | STM4419 |      | sugar (and other) trans  |         |
| 3638 | CHIP3662 | STM specil | 1 | 0 | STM4436 |      | putative endonuclease    |         |
| 3639 | CHIP3678 | STM/STY    | 1 | 0 | STM4486 | yjgB | putative alc             | STY4820 |
| 3640 | CHIP3022 | STM/STY    | 1 | 1 | STM2341 |      | putative tra             | STY2571 |
| 3641 | CHIP0199 | STM/STY    | 1 | 1 | STM1925 | flhD | regulator o              | STY2134 |
| 3642 | CHIP2306 | STM/STY    | 1 | 1 | STM1341 | btuE | ABC super                | STY1769 |
| 3643 | CHIP3992 | STM/STY    | 1 | 1 | STM2080 | udg  | UDP-gluco                | STY2289 |
| 3644 | CHIP1420 | STM/STY    | 1 | 1 | STM3836 | recF | gap repair               | STY3942 |
| 3645 | CHIP1436 | STM/STY    | 1 | 1 | STM2568 | yfhC | putative Cy              | STY2814 |
| 3646 | CHIP1364 | STM/STY    | 1 | 1 | STM0207 | pfs  | 5'-methylth              | STY0229 |
| 3647 | CHIP1388 | STM/STY    | 1 | 1 | STM0127 | ftsW | essential c              | STY0147 |
| 3648 | CHIP1404 | STM/STY    | 1 | 1 | STM0108 | tbpA | thiamine-bi              | STY0125 |
| 3649 | CHIP1494 | STM/STY    | 1 | 1 | STM2385 | yfcB | putative m               | STY2617 |
| 3650 | CHIP3915 | STM/STY    | 1 | 1 | STM1321 | ydjM | LexA regul               | STY1790 |
| 3651 | CHIP0508 | STM/STY    | 1 | 1 | STM1978 | fliO | flagellar bic            | STY2186 |
| 3652 | CHIP0524 | STM/STY    | 1 | 1 | STM2147 | thiM | hydroxyethy              | STY2376 |
| 3653 | CHIP3971 | STM/STY    | 1 | 1 | STM1469 | fumC | fumarase (               | STY1653 |
| 3654 | CHIP3995 | STM specil | 1 | 0 | STM2089 | rfbJ | LPS side chain defect:   |         |
| 3655 | CHIP3997 | STM/STY    | 1 | 1 | STM2094 | rfbC | dTDP-4,de                | STY2304 |
| 3656 | CHIP1425 | STM/STY    | 1 | 1 | STM3852 | yieH | putative ph              | STY3931 |
| 3657 | CHIP1353 | STM/STY    | 1 | 1 | STM0218 | pyrH | uridylyate ki            | STY0241 |
| 3658 | CHIP1465 | STM/STY    | 1 | 1 | STM0422 | dxs  | 1-deoxyxyly              | STY0461 |
| 3659 | CHIP1393 | STM/STY    | 1 | 1 | STM0136 | secA | preprotein               | STY0156 |
| 3660 | CHIP1505 | STM/STY    | 1 | 1 | STM2320 | nuoJ | NADH deh                 | STY2550 |
| 3661 | CHIP0977 | STM specil | 1 | 0 | STM1054 |      | Gifsy-2 prophage         |         |
| 3662 | CHIP1001 | STM/STY    | 0 | 1 | STM1016 |      | Gifsy-2 pro              | STY1024 |
| 3663 | CHIP1564 | STM/STY    | 1 | 1 | STM0502 | ybbL | putative AE              | STY0548 |
| 3664 | CHIP1580 | STM/STY    | 1 | 1 | STM0493 | fsr  | putative M               | STY0538 |
| 3665 | CHIP1988 | STM/STY    | 1 | 1 | STM4341 | frdC | fumarate r               | STY4701 |
| 3666 | CHIP3152 | STM specil | 1 | 0 | STM2608 |      | Gifsy-1 prophage: simi   |         |
| 3667 | CHIP3162 | STM/STY    | 0 | 1 | STM1021 |      | Gifsy-2 pro              | STY1035 |
| 3668 | CHIP3178 | STM/STY    | 1 | 1 | STM3186 | tolC | outer mem                | STY3364 |
| 3669 | CHIP3194 | STM/STY    | 1 | 1 | STM3218 | oat  | putative ac              | STY3396 |
| 3670 | CHIP3210 | STM/STY    | 1 | 1 | STM3261 |      | galactitol-1             | STY3444 |
| 3671 | CHIP1511 | STM/STY    | 1 | 1 | STM2296 | ais  | aluminum i               | STY2526 |
| 3672 | CHIP1543 | STM/STY    | 1 | 1 | STM2427 | lig  | DNA ligase               | STY2663 |
| 3673 | CHIP1569 | STM/STY    | 1 | 1 | STM0519 | glxR | tartronic se             | STY0567 |
| 3674 | CHIP1046 | STM/STY    | 0 | 0 |         |      |                          | STY0033 |
| 3675 | CHIP3141 | STM specil | 1 | 0 | STM2597 |      | Gifsy-1 prophage: simi   |         |
| 3676 | CHIP3157 | STM specil | 0 | 0 | STM2613 |      | Gifsy-1 prophage         |         |
| 3677 | CHIP3173 | STM/STY    | 1 | 1 | STM2652 | pssA | phosphatid               | STY2845 |
| 3678 | CHIP3189 | STM/STY    | 1 | 1 | STM3205 | bacA | bacitracin r             | STY3384 |
| 3679 | CHIP2059 | STM/STY    | 1 | 1 | STM3586 | yhiH | putative AE              | STY4224 |
| 3680 | CHIP3223 | STM/STY    | 1 | 1 | STM3280 | deaD | cysteine su              | STY3461 |
| 3681 | CHIP0593 | STM/STY    | 1 | 1 | STM0419 | thiL | thiamin-mc               | STY0458 |

|      |          |            |   |   |         |      |                        |          |
|------|----------|------------|---|---|---------|------|------------------------|----------|
| 3682 | CHIP0609 | STM/STY    | 1 | 1 | STM2440 | cysM | cysteine sy            | STY2677  |
| 3683 | CHIP0721 | STM/STY    | 1 | 1 | STM0845 | moeB | molybdopt              | STY0884  |
| 3684 | CHIP0737 | STM/STY    | 1 | 1 | STM0264 | dnaQ | DNA polym              | STY0285  |
| 3685 | CHIP0580 | STM/STY    | 1 | 1 | STM1422 | ssaU | Secretion s            | STY1698  |
| 3686 | CHIP0692 | STM/STY    | 1 | 1 | STM2352 | hisM | ABC super              | STY2582  |
| 3687 | CHIP0620 | STM/STY    | 1 | 1 | STM0013 | dnaJ | heat shock             | STY0013  |
| 3688 | CHIP0636 | STM/STY    | 1 | 1 | STM1737 | tonB | energy trar            | STY1314  |
| 3689 | CHIP0756 | STM/STY    | 1 | 1 | STM2455 | eutK | putative ca            | STY2692  |
| 3690 | CHIP1807 | STM/STY    | 1 | 1 | STM4078 | yneB | putative fru           | STY3792  |
| 3691 | CHIP0727 | STM/STY    | 1 | 1 | STM0066 | carA | carbamoyl-             | STY0076  |
| 3692 | CHIP0751 | STM/STY    | 1 | 1 | STM2460 | eutH | putative tra           | STY2697  |
| 3693 | CHIP1802 | STM/STY    | 1 | 1 | STM4123 | argH | argininosuc            | STY3750  |
| 3694 | CHIP1834 | STM/STY    | 1 | 1 | STM0758 | ybgR | putative CI            | STY0799  |
| 3695 | CHIP1866 | STM/STY    | 1 | 1 | STM0746 | tolR | tol protein,           | STY0792  |
| 3696 | CHIP0584 | STM/STY    | 1 | 1 | STM2807 | nrdE | ribonucleo             | STY2932  |
| 3697 | CHIP0386 | STM/STY    | 1 | 1 | STM1519 | marA | transcriptio           | STY1541  |
| 3698 | CHIP0402 | STM/STY    | 1 | 1 | STM2879 | sicP | chaparone,             | STY3002  |
| 3699 | CHIP1253 | STM/STY    | 1 | 1 | STM1680 | ycjI | putative ca            | STY1383  |
| 3700 | CHIP1277 | STM/STY    | 1 | 1 | STM3378 |      | putative inr           | STY3558  |
| 3701 | CHIP0466 | STM/STY    | 1 | 1 | STM0239 | yaeQ | putative cyI           | STY0264  |
| 3702 | CHIP0107 | STM/STY    | 1 | 1 | STM1231 | phoP | response r             | STY1271  |
| 3703 | CHIP0125 | STM/STY    | 1 | 1 | STM4168 | nfi  | endonucle              | STY3717  |
| 3704 | CHIP4724 | STM/STY    | 1 | 1 | STM2375 |      | putative cyI           | STY2606  |
| 3705 | CHIP3628 | STM/STY    | 1 | 1 | STM4377 | aidB | putative ac            | STY4733  |
| 3706 | CHIP0389 | STM/STY    | 1 | 1 | STM1393 | ssaB | Secretion s            | STY1727  |
| 3707 | CHIP0405 | STM/STY    | 1 | 1 | STM1193 | fabH | 3-oxoacyl-[            | STY1232  |
| 3708 | CHIP1256 | STM/STY    | 1 | 1 | STM1704 | yciT | putative re            | STY1347  |
| 3709 | CHIP1250 | STM/STY    | 1 | 1 | STM1904 | yecN | putative inr           | STY2112  |
| 3710 | CHIP0447 | STM/STY    | 0 | 0 |         |      |                        |          |
| 3711 | CHIP0463 | STM specil | 0 | 0 | STM1008 |      | Gifsy-2 prophage       |          |
| 3712 | CHIP0479 | STM/STY    | 1 | 1 | STM1142 | csgD | putative tra           | STY1179  |
| 3713 | CHIP4687 | STM/STY    | 1 | 1 | STM0717 |      | putative inr           | STY0757  |
| 3714 | CHIP0128 | STM/STY    | 1 | 1 | STM4171 | yjaH | putative inr           | STY3714  |
| 3715 | CHIP0010 | STM/STY    | 1 | 1 | STM3978 | yigC | putative ox            | STY3581  |
| 3716 | CHIP0034 | STM/STY    | 1 | 1 | STM3953 | yigF | putative inr           | STY3606  |
| 3717 | CHIP0066 | STM/STY    | 1 | 1 | STM3915 | trxA | thioredoxin            | STY3639  |
| 3718 | CHIP2868 | STM/STY    | 1 | 1 | STM1764 | narG | nitrate redt           | STY1288  |
| 3719 | CHIP1709 | STM/STY    | 1 | 1 | STM1822 | yoaB | putative tra           | STY1952  |
| 3720 | CHIP1725 | STM/STY    | 1 | 1 | STM1738 | ycil | putative cyI           | STY1313  |
| 3721 | CHIP1735 | STM/STY    | 1 | 1 | STM3010 | aas  | bifunctiona            | STY3153  |
| 3722 | CHIP1759 | STM/STY    | 1 | 1 | STM2897 | invE | invasion pr            | STY3020  |
| 3723 | CHIP0948 | STM/STY    | 1 | 1 | STM2699 |      | Fels-2 pro             | STY4605  |
| 3724 | CHIP0185 | STM/STY    | 1 | 1 | STM2046 | pduK | Propanedic             | STY2251  |
| 3725 | CHIP0539 | STM/STY    | 1 | 1 | STM1576 | narU | MFS super              | STY1489  |
| 3726 | CHIP0045 | STM/STY    | 1 | 1 | STM3941 |      | putative inr           | STY3618  |
| 3727 | CHIP0055 | STM/STY    | 1 | 1 | STM3927 |      | putative inr           | STY3628  |
| 3728 | CHIP0079 | STM/STY    | 1 | 1 | STM3900 | ilvL | ilvGEDA o              | STY3656A |
| 3729 | CHIP3133 | STM specil | 0 | 0 | STM2589 |      | Gifsy-1 prophage: simi |          |
| 3730 | CHIP1714 | STM/STY    | 1 | 1 | STM1807 | dsbB | putative di            | STY1936  |
| 3731 | CHIP1730 | STM/STY    | 1 | 1 | STM1715 | yciN | putative cyI           | STY1335  |
| 3732 | CHIP1754 | STM/STY    | 1 | 1 | STM2934 | cysN | ATP-sulfur             | STY3059  |
| 3733 | CHIP1133 | STM/STY    | 1 | 1 | STM1880 | yebE | putative inr           | STY2086  |



|      |          |            |   |   |          |      |                          |         |
|------|----------|------------|---|---|----------|------|--------------------------|---------|
| 3734 | CHIP1149 | STM/STY    | 1 | 1 | STM0617  | rna  | RNase I, cl              | STY0666 |
| 3735 | CHIP1173 | STM/STY    | 1 | 1 | STM1545  |      | putative m               | STY1517 |
| 3736 | CHIP4457 | STM/STY    | 1 | 1 | STM0598  | entA | 2,3-dihydr               | STY0642 |
| 3737 | CHIP1213 | STM/STY    | 1 | 1 | STM1612  |      | putative ce              | STY1452 |
| 3738 | CHIP2761 | STM specil | 1 | 0 | STM1555  |      | putative transcriptional |         |
| 3739 | CHIP2779 | STM/STY    | 1 | 1 | STM1587  | yncD | paral putati             | STY1478 |
| 3740 | CHIP2795 | STM/STY    | 1 | 1 | STM1615  |      | putative nu              | STY1449 |
| 3741 | CHIP2811 | STM/STY    | 1 | 1 | STM1634  |      | putative an              | STY1437 |
| 3742 | CHIP2931 | STM/STY    | 1 | 1 | STM1892  | znuC | ABC super                | STY2100 |
| 3743 | CHIP1128 | STM/STY    | 1 | 1 | STM0892  | ybjP | putative lip             | STY0925 |
| 3744 | CHIP4412 | STM/STY    | 1 | 1 | STM0522  | allP | putative NC              | STY0569 |
| 3745 | CHIP4414 | STM/STY    | 1 | 1 | STM0523  | allB | allantoinas              | STY0571 |
| 3746 | CHIP1178 | STM/STY    | 1 | 1 | STM0961  | lolA | periplasmic              | STY0959 |
| 3747 | CHIP1202 | STM/STY    | 1 | 1 | STM1640  | ydcF | putative inr             | STY1429 |
| 3748 | CHIP2862 | STM/STY    | 1 | 0 | STM1747  |      | putative inner membra    |         |
| 3749 | CHIP2878 | STM/STY    | 1 | 1 | STM1792  |      | putative cy              | STY1919 |
| 3750 | CHIP2894 | STM/STY    | 1 | 1 | STM1828  | yoaE | putative inr             | STY1958 |
| 3751 | CHIP4600 | STM/STY    | 1 | 1 | STM3074  |      | putative AE              | STY3232 |
| 3752 | CHIP2504 | STM/STY    | 1 | 1 | STM3672  | yiaN | putative D               | STY4126 |
| 3753 | CHIP4640 | STM specil | 1 | 0 | STM1553  |      | pseudogene; frameshil    |         |
| 3754 | CHIP2552 | STM/STY    | 1 | 1 | STM3799  |      | putative pe              | STY3980 |
| 3755 | CHIP4209 | STM/STY    | 1 | 1 | STM2986  |      | putative int             | STY3126 |
| 3756 | CHIP4241 | STM/STY    | 1 | 1 | STM3065  | yggE | putative pe              | STY3221 |
| 3757 | CHIP4267 | STM specil | 1 | 0 | STM3120  |      | putative transcriptional |         |
| 3758 | CHIP4283 | STM/STY    | 1 | 0 | STM3154  |      | putative ATP-depende     |         |
| 3759 | CHIP4587 | STM/STY    | 1 | 1 | STM2840  |      | putative fla             | STY2962 |
| 3760 | CHIP4611 | STM/STY    | 1 | 1 | STM3086  | speA | arginine de              | STY3240 |
| 3761 | CHIP4627 | STM specil | 1 | 0 | STM4186  |      | putative cytoplasmic pr  |         |
| 3762 | CHIP4643 | STM/STY    | 1 | 1 | STM3654  |      | pseudogen                | STY4146 |
| 3763 | CHIP4246 | STM specil | 1 | 0 | STM3080  |      | putative mannitol dehy   |         |
| 3764 | CHIP4262 | STM/STY    | 0 | 0 |          |      |                          |         |
| 3765 | CHIP4374 | STM/STY    | 1 | 1 | STM0455  | ybaX | putative (al             | STY0497 |
| 3766 | CHIP2470 | STM/STY    | 1 | 1 | STM3590  | uspB | universal s              | STY4213 |
| 3767 | CHIP4614 | STM/STY    | 1 | 1 | STM3108  | yggL | putative cy              | STY3263 |
| 3768 | CHIP4630 | STM/STY    | 0 | 0 |          |      |                          |         |
| 3769 | CHIP1956 | STM/STY    | 1 | 1 | STM4438  | pmbA | putative pe              | STY4777 |
| 3770 | CHIP1972 | STM/STY    | 1 | 1 | STM4561  | osmY | hyperosmo                | STY4911 |
| 3771 | CHIP1605 | STM/STY    | 1 | 1 | STM2812  |      | putative inr             | STY2938 |
| 3772 | CHIP1629 | STM/STY    | 1 | 1 | STM2128  | yegO | putative re              | STY2341 |
| 3773 | CHIP1645 | STM/STY    | 1 | 1 | STM2215  | rtn  | putative m               | STY2451 |
| 3774 | CHIP1661 | STM/STY    | 1 | 1 | STM2099  | wcaM | putative co              | STY2309 |
| 3775 | CHIP1631 | STM/STY    | 1 | 1 | STM2131  | baeR | response r               | STY2344 |
| 3776 | CHIP4531 | STM/STY    | 1 | 1 | STM2203  | nfo  | endonucle                | STY2438 |
| 3777 | CHIP1671 | STM/STY    | 1 | 1 | STM2122  | udk  | uridine/cyti             | STY2335 |
| 3778 | CHIP1687 | STM/STY    | 1 | 1 | STM1846  | proQ | activator of             | STY1977 |
| 3779 | CHIP2087 | STM/STY    | 1 | 1 | STM3695  | yibK | putative tR              | STY4101 |
| 3780 | CHIP2103 | STM/STY    | 1 | 1 | STM3645  | yiaD | putative ou              | STY4157 |
| 3781 | CHIP1681 | STM/STY    | 1 | 1 | STM2192  | yeiB | putative inr             | STY2426 |
| 3782 | CHIP1697 | STM/STY    | 1 | 1 | STM1775  | hemK | putative pr              | STY1900 |
| 3783 | CHIP2097 | STM/STY    | 1 | 1 | STM3670  |      | putative ch              | STY4128 |
| 3784 | CHIP1929 | STM/STY    | 0 | 0 | STM1869A |      | putative protein         |         |
| 3785 | CHIP1945 | STM/STY    | 1 | 1 | STM4375  | yjFM | putative inr             | STY4731 |

|      |          |            |   |   |         |         |                         |         |
|------|----------|------------|---|---|---------|---------|-------------------------|---------|
| 3786 | CHIP2161 | STM/STY    | 1 | 1 | STM3183 | icc     | cyclic 3',5'-           | STY3361 |
| 3787 | CHIP2147 | STM/STY    | 1 | 1 | STM3273 | yhbT    | putative lipi           | STY3456 |
| 3788 | CHIP2163 | STM/STY    | 1 | 1 | STM3158 | exbD    | uptake of e             | STY3331 |
| 3789 | CHIP2179 | STM/STY    | 1 | 1 | STM3067 | yggB    | putative mε             | STY3223 |
| 3790 | CHIP2196 | STM/STY    | 1 | 1 | STM3325 | yrbL    | putative cyf            | STY3504 |
| 3791 | CHIP0329 | STM/STY    | 1 | 1 | STM3759 | marT    | putative tra            | STY4027 |
| 3792 | CHIP2236 | STM/STY    | 1 | 1 | STM3164 | yqhD    | putative alc            | STY3337 |
| 3793 | CHIP0316 | STM/STY    | 1 | 1 | STM1660 | fnr     | transcriptio            | STY1404 |
| 3794 | CHIP0332 | STM/STY    | 1 | 1 | STM3763 | mgtB    | Mg2+ trans              | STY4023 |
| 3795 | CHIP2239 | STM/STY    | 1 | 1 | STM3156 |         | putative cyf            | STY3329 |
| 3796 | CHIP2255 | STM/STY    | 1 | 1 | STM3077 | yggG    | putative Zn             | STY3237 |
| 3797 | CHIP2271 | STM/STY    | 1 | 1 | STM1083 | yccX    | putative ph             | STY1110 |
| 3798 | CHIP3363 | STM/STY    | 1 | 1 | STM0785 | ybhE    | putative 3-α            | STY0818 |
| 3799 | CHIP2250 | STM/STY    | 1 | 1 | STM3097 | yqgF    | putative en             | STY3250 |
| 3800 | CHIP2266 | STM/STY    | 1 | 1 | STM1063 | pqiA    | paraquat-ir             | STY1084 |
| 3801 | CHIP3342 | STM/STY    | 1 | 1 | STM0748 | tolB    | tol protein             | STY0794 |
| 3802 | CHIP3374 | STM/STY    | 1 | 1 | STM0795 | bioF    | 7-keto-8-ar             | STY0828 |
| 3803 | CHIP3406 | STM/STY    | 1 | 1 | STM0842 | ybiV(1) | putative hy             | STY0881 |
| 3804 | CHIP0304 | STM/STY    | 1 | 1 | STM1599 | pdgL    | Periplasmic             | STY1465 |
| 3805 | CHIP4366 | STM/STY    | 1 | 1 | STM0440 | cyoD    | cytochromε              | STY0482 |
| 3806 | CHIP4233 | STM/STY    | 1 | 1 | STM3034 |         | putative cyf            | STY3183 |
| 3807 | CHIP4259 | STM/STY    | 1 | 1 | STM3102 | yggU    | putative cyf            | STY3255 |
| 3808 | CHIP4393 | STM/STY    | 1 | 1 | STM0485 | ybaB    | putative cyf            | STY0529 |
| 3809 | CHIP4449 | STM/STY    | 1 | 1 | STM0587 | ybdZ    | putative cyf            | STY0630 |
| 3810 | CHIP1536 | STM/STY    | 1 | 1 | STM2498 | upp     | uracil phos             | STY2739 |
| 3811 | CHIP3525 | STM specil | 1 | 0 | STM1034 |         | Gifsy-2 prophage; puta  |         |
| 3812 | CHIP4557 | STM/STY    | 1 | 1 | STM2148 |         | putative pe             | STY2377 |
| 3813 | CHIP4487 | STM/STY    | 1 | 1 | STM0355 |         | putative Cc             | STY0385 |
| 3814 | CHIP1020 | STM/STY    | 1 | 1 | STM0411 | yajD    | putative cyf            | STY0449 |
| 3815 | CHIP2036 | STM/STY    | 1 | 1 | STM3702 | grxC    | glutaredoxi             | STY4093 |
| 3816 | CHIP1990 | STM/STY    | 1 | 1 | STM4379 | yjfO    | putative lip            | STY4735 |
| 3817 | CHIP4150 | STM/STY    | 1 | 1 | STM2856 | hypC    | putative hy             | STY2978 |
| 3818 | CHIP2326 | STM/STY    | 1 | 1 | STM1118 | yccJ    | putative cyf            | STY1154 |
| 3819 | CHIP2343 | STM/STY    | 1 | 1 | STM1249 |         | putative pe             | STY1875 |
| 3820 | CHIP2299 | STM/STY    | 1 | 1 | STM1314 | celC    | PTS family              | STY1799 |
| 3821 | CHIP2544 | STM/STY    | 1 | 1 | STM3772 |         | putative ph             | STY4013 |
| 3822 | CHIP2545 | STM/STY    | 1 | 1 | STM3773 |         | putative Nt             | STY4012 |
| 3823 | CHIP2632 | STM/STY    | 1 | 0 | STM0056 |         | putative ox             | STY0065 |
| 3824 | CHIP2617 | STM/STY    | 1 | 1 | STM0018 |         | putative ex             | STY0018 |
| 3825 | CHIP2633 | STM/STY    | 1 | 1 | STM0057 |         | putative cit            | STY0066 |
| 3826 | CHIP2618 | STM/STY    | 1 | 0 | STM0019 |         | putative hy             | STY0019 |
| 3827 | CHIP2620 | STM/STY    | 1 | 1 | STM0029 |         | putative tra            | STY0035 |
| 3828 | CHIP2652 | STM/STY    | 1 | 1 | STM0093 | imp     | Organic so              | STY0108 |
| 3829 | CHIP1004 | STM/STY    | 1 | 1 | STM1146 | ymdA    | putative pe             | STY1183 |
| 3830 | CHIP2794 | STM/STY    | 1 | 1 | STM1613 |         | putative PT             | STY1451 |
| 3831 | CHIP2827 | STM/STY    | 1 | 1 | STM1662 | ynaJ    | putative inr            | STY1402 |
| 3832 | CHIP2788 | STM/STY    | 1 | 1 | STM1603 | yncJ    | putative pe             | STY1461 |
| 3833 | CHIP2758 | STM specil | 1 | 0 | STM1551 |         | putative cytoplasmic pr |         |
| 3834 | CHIP3200 | STM/STY    | 1 | 1 | STM3237 | yhaL    | putative cyf            | STY3417 |
| 3835 | CHIP1091 | STM specil | 1 | 0 | PSLT082 | traP    | conjugative transfer    |         |
| 3836 | CHIP1084 | STM specil | 1 | 0 | PSLT070 | psiA    | Plasmid SOS inhibition  |         |
| 3837 | CHIP1116 | STM specil | 0 | 0 |         |         |                         |         |

|      |          |            |   |   |         |       |                                 |
|------|----------|------------|---|---|---------|-------|---------------------------------|
| 3838 | CHIP1061 | STM specif | 1 | 0 | PSLT031 | rsdB  | resolvase                       |
| 3839 | CHIP1093 | STM specif | 1 | 0 | PSLT084 | traV  | conjugative transfer: as        |
| 3840 | CHIP0655 | STM specif | 1 | 0 | PSLT035 |       | putative transposase            |
| 3841 | CHIP4905 | none       | 0 | 0 | R460058 | arsR  |                                 |
| 3842 | CHIP4906 | none       | 0 | 0 | R460059 | arsD  |                                 |
| 3843 | CHIP4894 | none       | 0 | 0 | R460039 | mucB  |                                 |
| 3844 | CHIP4900 | none       | 0 | 0 | R460053 |       |                                 |
| 3845 | CHIP4888 | none       | 0 | 0 | R460033 | ccgC  |                                 |
| 3846 | CHIP4752 | STM specif | 1 | 0 | PSLT023 | repA2 | DNA replication                 |
| 3847 | CHIP4828 | STM/STY    | 1 | 1 | STM2714 |       | Fels-2 prophage STY4618         |
| 3848 | CHIP4832 | STM/STY    | 0 | 0 |         |       |                                 |
| 3849 | CHIP4836 | STM specif | 0 | 0 |         |       |                                 |
| 3850 | CHIP4840 | STM specif | 0 | 0 |         |       |                                 |
| 3851 | CHIP4844 | STM specif | 1 | 0 | STM0923 |       | Fels-1 prophage; putat          |
| 3852 | CHIP4848 | STM/STY    | 1 | 1 | STM3114 | speC  | ornithine decarboxylase STY3270 |
| 3853 | CHIP4934 | STY specif | 0 | 1 |         |       | STY0327                         |
| 3854 | CHIP4950 | STM/STY    | 0 | 1 |         |       | STY0746                         |
| 3855 | CHIP4966 | STY specif | 0 | 1 |         |       | STY1031                         |
| 3856 | CHIP4982 | STY specif | 0 | 0 |         |       | STY1053                         |
| 3857 | CHIP4997 | STY specif | 0 | 1 |         |       | STY1069                         |
| 3858 | CHIP5105 | STY specif | 0 | 1 |         |       | STY2045                         |
| 3859 | CHIP4952 | STY specif | 0 | 1 |         |       | STY0945                         |
| 3860 | CHIP4968 | STY specif | 0 | 1 |         |       | STY1033                         |
| 3861 | CHIP4983 | STY specif | 0 | 1 |         |       | STY1055                         |
| 3862 | CHIP4999 | STY specif | 0 | 0 |         |       | STY1071                         |
| 3863 | CHIP5107 | STY specif | 0 | 1 |         |       | STY2047                         |
| 3864 | CHIP5122 | STY specif | 0 | 1 |         |       | STY2063                         |
| 3865 | CHIP5056 | STY specif | 0 | 1 |         |       | STY1633                         |
| 3866 | CHIP5072 | STY specif | 0 | 1 |         |       | STY1890                         |
| 3867 | CHIP5085 | STY specif | 0 | 1 |         |       | STY2024                         |
| 3868 | CHIP5194 | STY specif | 0 | 1 |         |       | STY3090                         |
| 3869 | CHIP5124 | STY specif | 0 | 1 |         |       | STY2065                         |
| 3870 | CHIP5140 | STM/STY    | 0 | 1 |         |       | STY2209                         |
| 3871 | CHIP5074 | STY specif | 0 | 1 |         |       | STY2003                         |
| 3872 | CHIP5003 | STM/STY    | 0 | 0 |         |       |                                 |
| 3873 | CHIP5110 | STY specif | 0 | 1 |         |       | STY2051                         |
| 3874 | CHIP5216 | STM/STY    | 0 | 0 |         |       | STY3533                         |
| 3875 | CHIP5232 | STM/STY    | 0 | 1 |         |       | STY3668                         |
| 3876 | CHIP5246 | STY specif | 0 | 1 |         |       | STY3684                         |
| 3877 | CHIP5389 | STY specif | 0 | 1 |         |       | STY4663                         |
| 3878 | CHIP5404 | STY specif | 0 | 1 |         |       | STY4680                         |
| 3879 | CHIP5420 | STY specif | 0 | 1 |         |       | STY4832                         |
| 3880 | CHIP5435 | STM/STY    | 0 | 1 |         |       | STY4881                         |
| 3881 | CHIP5374 | STY specif | 0 | 1 |         |       | STY4632                         |
| 3882 | CHIP5390 | STY specif | 0 | 1 |         |       | STY4664                         |
| 3883 | buffer   | none       | 0 | 0 |         |       |                                 |
| 3884 | empty    | none       | 0 | 0 |         |       |                                 |
| 3885 | empty    | none       | 0 | 0 |         |       |                                 |
| 3886 | empty    | none       | 0 | 0 |         |       |                                 |
| 3887 | empty    | none       | 0 | 0 |         |       |                                 |
| 3888 | empty    | none       | 0 | 0 |         |       |                                 |
| 3889 | CHIP2745 | STM specif | 1 | 0 | STM1531 |       | putative hydrogenase            |

|      |          |            |   |   |         |      |                          |          |
|------|----------|------------|---|---|---------|------|--------------------------|----------|
| 3890 | CHIP2570 | STM/STY    | 1 | 1 | STM3823 | torC | trimethylar              | STY3955  |
| 3891 | CHIP0803 | STM/STY    | 1 | 1 | STM0434 | apbA | ketopantoa               | STY0473  |
| 3892 | CHIP0819 | STM/STY    | 1 | 1 | STM2019 | cbiP | synthesis c              | STY2222  |
| 3893 | CHIP2626 | STM/STY    | 1 | 1 | STM0039 | nhaA | NhaA famil               | STY0047  |
| 3894 | CHIP2642 | STM/STY    | 1 | 1 | STM0075 | fixA | putative fla             | STY0085  |
| 3895 | CHIP0837 | STM/STY    | 1 | 1 | STM4050 | rhaT | DMT Supe                 | STY3823  |
| 3896 | CHIP0853 | STM/STY    | 1 | 1 | STM3173 | plsC | 1-acyl-sn-g              | STY3350  |
| 3897 | CHIP3244 | STM/STY    | 1 | 1 | STM3327 | yhbL | sigma cros               | STY3506  |
| 3898 | CHIP3260 | STM/STY    | 1 | 1 | STM3366 | yhcR | putative inr             | STY3546a |
| 3899 | CHIP3276 | STM/STY    | 1 | 1 | STM3391 | acrF | RND family               | STY3570  |
| 3900 | CHIP3292 | STM/STY    | 1 | 1 | STM0653 | ybeL | putative cyI             | STY0704  |
| 3901 | CHIP2678 | STM/STY    | 1 | 1 | STM0154 | lpdA | lipoamide c              | STY0177  |
| 3902 | CHIP2694 | STM/STY    | 1 | 0 | STM0178 | yadI | putative PT              | STY0196  |
| 3903 | CHIP2710 | STM/STY    | 1 | 1 | STM0210 | yaeG | putative inr             | STY0232  |
| 3904 | CHIP2726 | STM/STY    | 1 | 1 | STM0241 | cutF | pseudogen                | STY0266  |
| 3905 | CHIP2742 | STM specil | 1 | 0 | STM1525 | yneH | putative glutaminase     |          |
| 3906 | CHIP0776 | STM specil | 1 | 0 | STM3636 | lpfE | long polar fimbrial minc |          |
| 3907 | CHIP2448 | STM/STY    | 1 | 1 | STM3543 | gntR | transcriptio             | STY4268  |
| 3908 | CHIP3713 | STM specil | 1 | 0 | STM4539 |      | putative glucosamine-f   |          |
| 3909 | CHIP3737 | STM/STY    | 1 | 1 | STM4592 | sthD | putative firr            | STY4940  |
| 3910 | CHIP4049 | STM specil | 1 | 0 | STM2742 |      | putative cytoplasmic pr  |          |
| 3911 | CHIP3777 | STM specil | 0 | 0 | STM0325 |      | putative IS3 transposa:  |          |
| 3912 | CHIP3793 | STM specil | 1 | 0 | STM1052 |      | pseudogene; in-frame     |          |
| 3913 | CHIP4027 | STM/STY    | 1 | 1 | STM2708 |      | Fels-2 prop              | STY4613  |
| 3914 | CHIP4043 | STM specil | 1 | 0 | STM2734 |      | Fels-2 prophage: hypo    |          |
| 3915 | CHIP3771 | STM/STY    | 1 | 1 | STM0311 | yafJ | putative glt             | STY0356  |
| 3916 | CHIP4083 | STM/STY    | 1 | 1 | STM2783 | nxiA | putative nic             | STY2901  |
| 3917 | CHIP3819 | STM/STY    | 1 | 1 | STM1101 | hpaG | 4-hydroxyp               | STY1134  |
| 3918 | CHIP3835 | STM/STY    | 1 | 1 | STM1135 | ycdW | paral putati             | STY1172  |
| 3919 | CHIP3789 | STM specil | 0 | 0 |         |      |                          |          |
| 3920 | CHIP3813 | STM/STY    | 1 | 1 | STM1092 | orfX | putative cyI             | STY1124  |
| 3921 | CHIP3829 | STM/STY    | 1 | 1 | STM1126 | phoH | PhoB-depe                | STY1162  |
| 3922 | CHIP3845 | STM/STY    | 1 | 1 | STM1158 |      | putative inr             | STY1195  |
| 3923 | CHIP3861 | STM/STY    | 1 | 1 | STM1206 | ycfL | putative ou              | STY1246  |
| 3924 | CHIP2437 | STM specil | 1 | 0 | STM3529 |      | putative glycerol dehyd  |          |
| 3925 | CHIP2383 | STM/STY    | 1 | 1 | STM3401 | aroE | dehydroshi               | STY4396  |
| 3926 | CHIP3847 | STM/STY    | 1 | 1 | STM1164 | yceB | putative ou              | STY1202  |
| 3927 | CHIP2423 | STM/STY    | 1 | 1 | STM3506 | feoB | FeoB famil               | STY4290  |
| 3928 | CHIP2439 | STM specil | 1 | 0 | STM3530 |      | pseudogene; frameshil    |          |
| 3929 | CHIP2463 | STM/STY    | 1 | 1 | STM3579 | yhhQ | putative int             | STY4232  |
| 3930 | CHIP4112 | STM/STY    | 1 | 1 | STM4073 | ydeW | putative tra             | STY3797  |
| 3931 | CHIP3530 | STM specil | 1 | 0 | STM1039 |      | Gifsy-2 prophage; prot   |          |
| 3932 | CHIP3546 | STM specil | 1 | 0 | STM4204 |      | putative inner membra    |          |
| 3933 | CHIP3570 | STM/STY    | 1 | 1 | STM4246 | dnaB | putative reI             | STY4442  |
| 3934 | CHIP3586 | STM/STY    | 1 | 1 | STM4283 | gltP | DAACS far                | STY4482  |
| 3935 | CHIP4178 | STM/STY    | 1 | 1 | STM2929 | ispF | 2C-methyl-               | STY3054  |
| 3936 | CHIP3426 | STM/STY    | 1 | 1 | STM0871 | ybjM | putative inr             | STY0904  |
| 3937 | CHIP3044 | STM/STY    | 1 | 1 | STM2379 |      | putative pe              | STY2610  |
| 3938 | CHIP3452 | STM specil | 1 | 0 | STM0909 |      | Fels-1 prophage          |          |
| 3939 | CHIP3468 | STM specil | 0 | 0 | STM0925 |      | Fels-1 prophage; putat   |          |
| 3940 | CHIP3108 | STM/STY    | 1 | 1 | STM2532 |      | putative inr             | STY2778  |
| 3941 | CHIP3533 | STM/STY    | 1 | 1 | STM4184 | aceA | isocitrate ly            | STY4402  |

|      |          |            |   |   |         |       |                          |
|------|----------|------------|---|---|---------|-------|--------------------------|
| 3942 | CHIP3549 | STM specil | 1 | 0 | STM4207 |       | putative phage basepla   |
| 3943 | CHIP3583 | STM/STY    | 1 | 1 | STM4278 | nrfB  | formate-de STY4476       |
| 3944 | CHIP3599 | STM/STY    | 1 | 1 | STM4315 |       | putative Ar: STY4515     |
| 3945 | CHIP3615 | STM/STY    | 1 | 1 | STM4347 | yjeP  | putative pe STY4707      |
| 3946 | CHIP3055 | STM/STY    | 1 | 1 | STM2401 | ddg   | cold shock: STY2639      |
| 3947 | CHIP3071 | STM/STY    | 1 | 1 | STM2446 |       | putative iro STY2683     |
| 3948 | CHIP3087 | STM/STY    | 1 | 1 | STM2488 | nlpB  | lipoprotein- STY2726     |
| 3949 | CHIP0266 | STM/STY    | 1 | 1 | STM1295 | sppA  | protease I\ STY1819      |
| 3950 | CHIP0282 | STM/STY    | 1 | 1 | STM0024 | bcfD  | fimbrial sut STY0029     |
| 3951 | CHIP3626 | STM/STY    | 1 | 1 | STM4374 | yjfL  | putative inr STY4730     |
| 3952 | CHIP3642 | STM/STY    | 1 | 1 | STM4411 | ytfP  | putative cyf STY4770     |
| 3953 | CHIP2986 | STM/STY    | 1 | 1 | STM2273 |       | putative de STY2500      |
| 3954 | CHIP3010 | STM/STY    | 1 | 1 | STM2319 | nuoK  | NADH deh: STY2549        |
| 3955 | CHIP3004 | STM/STY    | 1 | 1 | STM2311 | elaB  | putative inr STY2542     |
| 3956 | CHIP3020 | STM/STY    | 1 | 1 | STM2339 | yfcC  | putative int STY2569     |
| 3957 | CHIP0197 | STM/STY    | 1 | 1 | STM2058 | pduX  | Propanedic STY2263       |
| 3958 | CHIP0213 | STM/STY    | 1 | 1 | STM3242 | tdcD  | propionate STY3424       |
| 3959 | CHIP0229 | STM specil | 1 | 0 | STM0197 | stfD  | putative periplasmic fin |
| 3960 | CHIP2328 | STM/STY    | 1 | 1 | STM1149 | mdoC  | membrane STY1186         |
| 3961 | CHIP0231 | STM specil | 1 | 0 | STM0199 | stfF  | putative minor fimbrial  |
| 3962 | CHIP0247 | STM/STY    | 1 | 1 | STM0367 | prpR  | regulator fc STY0399     |
| 3963 | CHIP2346 | STM/STY    | 1 | 1 | STM1284 | yeaH  | putative cyf STY1832     |
| 3964 | CHIP2362 | STM/STY    | 1 | 1 | STM1428 | ydhC  | putative Mf STY1694      |
| 3965 | CHIP3631 | STM/STY    | 1 | 1 | STM4383 | sgaT  | putative PT STY4739      |
| 3966 | CHIP3647 | STM specil | 1 | 0 | STM4420 |       | putative inner membra    |
| 3967 | CHIP1500 | STM/STY    | 1 | 1 | STM2356 | ubiX  | 3-octapren: STY2586      |
| 3968 | CHIP3921 | STM/STY    | 1 | 1 | STM1337 | pheS  | phenylalan STY1773       |
| 3969 | CHIP3945 | STM/STY    | 1 | 1 | STM1372 | sufD  | required fo STY1751      |
| 3970 | CHIP0538 | STM/STY    | 1 | 1 | STM4560 | prfC  | peptide chz STY4910      |
| 3971 | CHIP3985 | STM/STY    | 1 | 1 | STM1494 |       | ABC-type t STY1570       |
| 3972 | CHIP1317 | STM/STY    | 1 | 1 | STM3776 | yicM  | putative Mf STY4008      |
| 3973 | CHIP0572 | STM/STY    | 1 | 1 | STM4230 | malkK | bifunctiona STY4426      |
| 3974 | CHIP1423 | STM/STY    | 1 | 1 | STM3882 | rbsA  | ABC super STY3896        |
| 3975 | CHIP1359 | STM/STY    | 1 | 1 | STM0248 | yaeD  | putative de STY0275      |
| 3976 | CHIP1375 | STM/STY    | 1 | 1 | STM1991 | vsr   | DNA mism STY2199         |
| 3977 | CHIP1487 | STM/STY    | 1 | 1 | STM4241 | zur   | transcriptio STY4437     |
| 3978 | CHIP3908 | STM/STY    | 1 | 0 | STM1305 | astD  | succinylglu STY1809      |
| 3979 | CHIP3910 | STM/STY    | 1 | 1 | STM1308 | spy   | periplasmic STY1805      |
| 3980 | CHIP3934 | STM specil | 1 | 0 | STM1356 | ydiO  | putative acyl-CoA dehy   |
| 3981 | CHIP3958 | STM/STY    | 1 | 1 | STM1442 | ydhJ  | putative mt STY1680      |
| 3982 | CHIP0551 | STM/STY    | 1 | 1 | STM1176 | flgD  | flagellar bic STY1215    |
| 3983 | CHIP3998 | STM/STY    | 1 | 1 | STM2095 | rfbA  | dTDP-gluc STY2305        |
| 3984 | CHIP1338 | STM/STY    | 1 | 1 | STM0319 | crI   | transcriptio STY0364     |
| 3985 | CHIP2012 | STM/STY    | 1 | 1 | STM4513 | yjiG  | putative pe STY4869      |
| 3986 | CHIP2028 | STM/STY    | 1 | 1 | STM4596 |       | putative inr STY4945     |
| 3987 | CHIP2052 | STM/STY    | 1 | 1 | STM3617 | bcsC  | endo-1,4-D STY4183       |
| 3988 | CHIP3216 | STM/STY    | 1 | 1 | STM3270 | yhbP  | putative cyf STY3453     |
| 3989 | CHIP1509 | STM/STY    | 1 | 1 | STM2306 | menC  | o-succinylb STY2536      |
| 3990 | CHIP1525 | STM/STY    | 1 | 1 | STM2286 | glpC  | sn-glycerol STY2515      |
| 3991 | CHIP1551 | STM/STY    | 1 | 1 | STM2491 | bcp   | thiol peroxi STY2729     |
| 3992 | CHIP1583 | STM/STY    | 1 | 1 | STM0505 | ybbO  | putative ox STY0551      |
| 3993 | CHIP3139 | STM specil | 1 | 0 | STM2595 |       | Gifsy-1 prophage: simi   |

|      |          |            |   |   |         |                                   |
|------|----------|------------|---|---|---------|-----------------------------------|
| 3994 | CHIP3155 | STM specil | 1 | 0 | STM2611 | Gifsy-1 prophage                  |
| 3995 | CHIP2031 | STM/STY    | 1 | 1 | STM3746 | gltS GltS family STY4047          |
| 3996 | CHIP2047 | STM/STY    | 1 | 1 | STM3629 | dppB ABC super STY4169            |
| 3997 | CHIP2049 | STM/STY    | 1 | 1 | STM3626 | dppF ABC super STY4172            |
| 3998 | CHIP2065 | STM/STY    | 1 | 1 | STM3545 | yhhX putative ox STY4266          |
| 3999 | CHIP0975 | STM specil | 1 | 0 | STM1042 | Gifsy-2 prophage; prot            |
| 4000 | CHIP0999 | STM/STY    | 0 | 1 | STM1014 | Gifsy-2 pro STY1022               |
| 4001 | CHIP1023 | STM/STY    | 1 | 1 | STM4470 | yjgD putative cyf STY4808         |
| 4002 | CHIP1039 | STM/STY    | 1 | 1 | STM2945 | sopD secreted pi STY3073          |
| 4003 | CHIP0649 | STM/STY    | 1 | 1 | STM4460 | pyrB aspartate c STY4800          |
| 4004 | CHIP1804 | STM/STY    | 1 | 1 | STM4101 | metL aspartokin $\alpha$ STY3768  |
| 4005 | CHIP1836 | STM/STY    | 1 | 1 | STM0706 | kdpA P-type ATF STY0747           |
| 4006 | CHIP1876 | STM/STY    | 1 | 1 | STM0713 | ybgK putative ca STY0753          |
| 4007 | CHIP0586 | STM/STY    | 1 | 1 | STM0544 | fimI fimbrial prc STY0590         |
| 4008 | CHIP0602 | STM/STY    | 1 | 1 | STM2565 | purG phosphorib STY2812           |
| 4009 | CHIP1815 | STM/STY    | 1 | 1 | STM4049 | rhaR positive re $\gamma$ STY3824 |
| 4010 | CHIP1847 | STM/STY    | 0 | 0 |         | STY0696                           |
| 4011 | CHIP1879 | STM/STY    | 1 | 1 | STM0268 | putative cyf STY0289              |
| 4012 | CHIP0589 | STM/STY    | 1 | 1 | STM2559 | cadA lysine deca STY2806          |
| 4013 | CHIP0613 | STM/STY    | 1 | 1 | STM3502 | ompR response r $\alpha$ STY4294  |
| 4014 | CHIP0629 | STM/STY    | 1 | 1 | STM1695 | sapD ABC super STY1356            |
| 4015 | CHIP0680 | STM/STY    | 1 | 1 | STM0110 | leuD 3-isopropyl STY0129          |
| 4016 | CHIP0608 | STM/STY    | 1 | 1 | STM1749 | adhE iron-depen STY1302           |
| 4017 | CHIP0632 | STM/STY    | 1 | 1 | STM2892 | invJ surface pre STY3015          |
| 4018 | CHIP0752 | STM/STY    | 1 | 1 | STM2459 | eutA CPPZ-55 p STY2696            |
| 4019 | CHIP1819 | STM/STY    | 1 | 1 | STM4029 | yiiD putative ac STY3849          |
| 4020 | CHIP1851 | STM/STY    | 1 | 1 | STM0634 | ybeF putative tra STY0684         |
| 4021 | CHIP0123 | STM/STY    | 1 | 1 | STM4165 | rsd regulator o $\alpha$ STY3720  |
| 4022 | CHIP0139 | STM/STY    | 1 | 1 | STM4022 | yihT putative alc STY3856         |
| 4023 | CHIP4738 | STM/STY    | 1 | 1 | STM4002 | putative cyf STY3879              |
| 4024 | CHIP0387 | STM/STY    | 1 | 1 | STM1518 | marB multiple an STY1542          |
| 4025 | CHIP0403 | STM/STY    | 1 | 1 | STM1191 | rpmF 50S riboso STY1230           |
| 4026 | CHIP1254 | STM/STY    | 1 | 1 | STM1682 | tpx thiol peroxi STY1381          |
| 4027 | CHIP0429 | STM/STY    | 1 | 1 | STM2501 | ppk polyphosph $\alpha$ STY2742   |
| 4028 | CHIP1280 | STM/STY    | 1 | 1 | STM3362 | putative pe STY3543               |
| 4029 | CHIP0469 | STM/STY    | 1 | 1 | STM3719 | rfaB UDP-D-gal STY4076            |
| 4030 | CHIP4677 | STM/STY    | 1 | 0 | STM0305 | putative cyf STY0342              |
| 4031 | CHIP0118 | STM/STY    | 1 | 1 | STM4160 | thiG deoxyxyluk STY3725           |
| 4032 | CHIP4717 | STM/STY    | 1 | 1 | STM3774 | putative inr STY4010              |
| 4033 | CHIP4711 | STM/STY    | 1 | 1 | STM1948 | putative inr STY2156              |
| 4034 | CHIP0152 | STM/STY    | 1 | 1 | STM3870 | atpE membrane STY3908             |
| 4035 | CHIP0176 | STM/STY    | 1 | 1 | STM2037 | pduF Propanedic STY2242           |
| 4036 | CHIP1227 | STM/STY    | 1 | 1 | STM4294 | yjdE putative AF STY4493          |
| 4037 | CHIP1243 | STM/STY    | 1 | 1 | STM1911 | putative cyf STY2120              |
| 4038 | CHIP1267 | STM/STY    | 1 | 1 | STM1712 | acnA aconitate h STY1339          |
| 4039 | CHIP0898 | STM/STY    | 1 | 1 | STM2670 | aroF 3-deoxy-D- STY2857           |
| 4040 | CHIP1749 | STM/STY    | 1 | 1 | STM2960 | gudD d-glucarate STY3098          |
| 4041 | CHIP0938 | STM/STY    | 1 | 1 | STM0428 | phnT 2-aminoeth STY0467           |
| 4042 | CHIP0011 | STM/STY    | 1 | 1 | STM3977 | rfaH transcriptio STY3582         |
| 4043 | CHIP0035 | STM/STY    | 1 | 1 | STM3952 | corA MIT family, STY3607          |
| 4044 | CHIP0059 | STM/STY    | 1 | 0 | STM3923 | rffH glucose-1-phosphate tl       |
| 4045 | CHIP1136 | STM/STY    | 1 | 1 | STM1885 | edd 6-phospho $\alpha$ STY2093    |

|      |          |            |   |   |         |      |                            |         |
|------|----------|------------|---|---|---------|------|----------------------------|---------|
| 4046 | CHIP0069 | STM/STY    | 1 | 1 | STM3912 | rep  | rep helicase               | STY3642 |
| 4047 | CHIP2658 | STM/STY    | 1 | 1 | STM0107 | yabK | putative bir               | STY0124 |
| 4048 | CHIP1704 | STM/STY    | 1 | 1 | STM1748 | yehE | putative int               | STY1303 |
| 4049 | CHIP1720 | STM/STY    | 1 | 1 | STM1788 |      | putative Ni                | STY1915 |
| 4050 | CHIP1736 | STM/STY    | 1 | 1 | STM3001 | thyA | thymidylate                | STY3142 |
| 4051 | CHIP0927 | STM/STY    | 1 | 1 | STM1743 | oppD | ABC super                  | STY1308 |
| 4052 | CHIP1786 | STM/STY    | 1 | 1 | STM4042 |      | putative br                | STY3833 |
| 4053 | CHIP0032 | STM/STY    | 1 | 1 | STM3955 | rarD | chloramph                  | STY3604 |
| 4054 | CHIP0072 | STM/STY    | 1 | 1 | STM3907 |      | putative cy                | STY3650 |
| 4055 | CHIP3145 | STM specil | 1 | 0 | STM2601 |      | Gifsy-1 prophage: simi     |         |
| 4056 | CHIP1715 | STM/STY    | 1 | 1 | STM1804 | ycgB | putative cy                | STY1933 |
| 4057 | CHIP2865 | STM/STY    | 1 | 1 | STM1756 | purU | formyltetra                | STY1294 |
| 4058 | CHIP2785 | STM/STY    | 1 | 1 | STM1597 | ydcW | putative alc               | STY1467 |
| 4059 | CHIP2905 | STM/STY    | 1 | 1 | STM1845 | prc  | carboxy-ter                | STY1976 |
| 4060 | CHIP2929 | STM/STY    | 1 | 1 | STM1890 | yebA | putative Pe                | STY2098 |
| 4061 | CHIP4402 | STM/STY    | 1 | 1 | STM0504 | ybbN | paral putati               | STY0550 |
| 4062 | CHIP4418 | STM/STY    | 1 | 1 | STM0527 | allC | allantoate ε               | STY0575 |
| 4063 | CHIP4420 | STM/STY    | 1 | 1 | STM0531 | yibF | putative cy                | STY0579 |
| 4064 | CHIP4444 | STM/STY    | 1 | 1 | STM0579 | ybdF | putative cy                | STY0621 |
| 4065 | CHIP4468 | STM/STY    | 1 | 1 | STM0616 | rnk  | regulator o                | STY0664 |
| 4066 | CHIP2756 | STM/STY    | 1 | 0 | STM1549 |      | putative translation initi |         |
| 4067 | CHIP2876 | STM/STY    | 1 | 1 | STM1785 |      | putative cy                | STY1911 |
| 4068 | CHIP2796 | STM/STY    | 1 | 1 | STM1617 |      | putative rib               | STY1447 |
| 4069 | CHIP2798 | STM/STY    | 1 | 1 | STM1620 |      | putative ox                | STY1444 |
| 4070 | CHIP2822 | STM/STY    | 0 | 0 |         |      |                            | STY1415 |
| 4071 | CHIP2838 | STM/STY    | 1 | 1 | STM1681 | ycjG | putative ch                | STY1382 |
| 4072 | CHIP4399 | STM/STY    | 1 | 1 | STM0498 | ybaR | putative co                | STY0544 |
| 4073 | CHIP1155 | STM/STY    | 1 | 1 | STM1522 | ydeA | MFS family                 | STY1538 |
| 4074 | CHIP1171 | STM/STY    | 1 | 1 | STM1560 |      | putative al                | STY1503 |
| 4075 | CHIP4249 | STM specil | 1 | 0 | STM3083 |      | putative Mannitol dehy     |         |
| 4076 | CHIP4361 | STM/STY    | 1 | 1 | STM0435 | yajQ | putative cy                | STY0474 |
| 4077 | CHIP2465 | STM/STY    | 1 | 1 | STM3582 | yhhT | putative Pe                | STY4229 |
| 4078 | CHIP4601 | STM/STY    | 0 | 0 |         |      |                            | STY3834 |
| 4079 | CHIP2505 | STM/STY    | 1 | 1 | STM3673 | yiaO | putative dic               | STY4123 |
| 4080 | CHIP2529 | STM/STY    | 1 | 1 | STM3732 | ttk  | putative tra               | STY4062 |
| 4081 | CHIP2531 | STM/STY    | 1 | 1 | STM3739 | yicF | putative D                 | STY4054 |
| 4082 | CHIP4204 | STM/STY    | 1 | 1 | STM2977 | fucK | L-fuculokin                | STY3117 |
| 4083 | CHIP4316 | STM/STY    | 1 | 0 | STM2695 |      | Fels-2 prophage: simil     |         |
| 4084 | CHIP4348 | STM/STY    | 1 | 1 | STM0396 | sbcD | ATP-deper                  | STY0430 |
| 4085 | CHIP4276 | STM/STY    | 1 | 1 | STM3138 |      | putative m                 | STY3309 |
| 4086 | CHIP2476 | STM/STY    | 1 | 0 | STM3601 |      | putative ph                | STY4202 |
| 4087 | CHIP2518 | STM/STY    | 1 | 1 | STM3696 |      | putative tra               | STY4100 |
| 4088 | CHIP2550 | STM/STY    | 1 | 0 | STM3784 |      | putative ph                | STY3998 |
| 4089 | CHIP4311 | STM/STY    | 1 | 1 | STM2689 |      | pseudogen                  | STY2875 |
| 4090 | CHIP4335 | STM/STY    | 0 | 0 |         |      |                            | STY0061 |
| 4091 | CHIP4359 | STM/STY    | 1 | 1 | STM0423 | ispA | geranyltran                | STY0462 |
| 4092 | CHIP4287 | STM/STY    | 1 | 1 | STM3165 | yqhE | 2,5-diketo-l               | STY3338 |
| 4093 | CHIP4545 | STM specil | 1 | 0 | STM2236 |      | putative phage protein     |         |
| 4094 | CHIP4561 | STM/STY    | 1 | 1 | STM2157 | yehS | putative cy                | STY2387 |
| 4095 | CHIP1893 | STM/STY    | 1 | 1 | STM0938 | ybjE | putative inr               | STY0934 |
| 4096 | CHIP2101 | STM/STY    | 1 | 1 | STM3650 |      | putative pe                | STY4152 |
| 4097 | CHIP1933 | STM/STY    | 1 | 1 | STM4338 | sugE | putative D                 | STY4698 |

|      |          |            |   |   |         |      |                          |         |
|------|----------|------------|---|---|---------|------|--------------------------|---------|
| 4098 | CHIP1957 | STM/STY    | 1 | 1 | STM4439 | cybC | cytochromε               | STY4778 |
| 4099 | CHIP1919 | STM/STY    | 1 | 1 | STM3438 | rplW | 50S riboso               | STY4360 |
| 4100 | CHIP1935 | STM/STY    | 1 | 1 | STM4357 | yjeE | putative nu              | STY4714 |
| 4101 | CHIP2143 | STM/STY    | 1 | 0 | STM3285 | rbfA | ribosome-t               | STY3466 |
| 4102 | CHIP2159 | STM/STY    | 1 | 1 | STM3200 | rfaE | bifunctiona              | STY3379 |
| 4103 | CHIP2175 | STM/STY    | 1 | 1 | STM3128 |      | putative ox              | STY3297 |
| 4104 | CHIP1616 | STM/STY    | 1 | 1 | STM2816 |      | putative gly             | STY2942 |
| 4105 | CHIP1977 | STM/STY    | 1 | 1 | STM4582 | slt  | lytic mureir             | STY4929 |
| 4106 | CHIP4494 | STM/STY    | 1 | 1 | STM0376 | sbmA | putative AE              | STY0408 |
| 4107 | CHIP1642 | STM/STY    | 1 | 0 | STM2212 | yeiR | putative co              | STY2448 |
| 4108 | CHIP1658 | STM/STY    | 1 | 1 | STM2091 | rfbG | LPS side c               | STY2301 |
| 4109 | CHIP1674 | STM/STY    | 1 | 1 | STM2150 | stcC | paral putati             | STY2379 |
| 4110 | CHIP1690 | STM/STY    | 1 | 1 | STM1836 |      | putative pe              | STY1965 |
| 4111 | CHIP2244 | STM/STY    | 0 | 0 |         |      |                          |         |
| 4112 | CHIP2260 | STM/STY    | 1 | 1 | STM3064 | iciA | inhibitor of             | STY3220 |
| 4113 | CHIP3344 | STM/STY    | 1 | 1 | STM0750 | ybgF | putative pe              | STY0796 |
| 4114 | CHIP3392 | STM/STY    | 1 | 1 | STM0820 | rhIE | putative AT              | STY0855 |
| 4115 | CHIP2189 | STM/STY    | 1 | 1 | STM3043 | dsbC | protein dist             | STY3199 |
| 4116 | CHIP0322 | STM/STY    | 1 | 1 | STM1179 | flgG | flagellar bic            | STY1218 |
| 4117 | CHIP3371 | STM/STY    | 1 | 1 | STM0792 | ybhB | putative Ph              | STY0825 |
| 4118 | CHIP3419 | STM specil | 1 | 0 | STM0860 |      | putative inner membra    |         |
| 4119 | CHIP2200 | STM/STY    | 1 | 1 | STM3317 | yrbK | putative inr             | STY3496 |
| 4120 | CHIP0333 | STM/STY    | 1 | 1 | STM3764 | mgtC | Mg2+ trans               | STY4022 |
| 4121 | CHIP2248 | STM/STY    | 1 | 1 | STM3101 | yggT | putative int             | STY3254 |
| 4122 | CHIP0381 | STM/STY    | 1 | 1 | STM1947 | uvrY | putative re:             | STY2155 |
| 4123 | CHIP2195 | STM/STY    | 1 | 1 | STM3330 | gltB | glutamate :              | STY3510 |
| 4124 | CHIP2211 | STM/STY    | 1 | 1 | STM3254 |      | putative fru             | STY3436 |
| 4125 | CHIP2227 | STM/STY    | 1 | 1 | STM3211 | rpoD | sigma D (s               | STY3390 |
| 4126 | CHIP0360 | STM/STY    | 1 | 1 | STM1399 | sscA | Secretion ε              | STY1721 |
| 4127 | CHIP0384 | STM specil | 1 | 0 | STM2232 | oafA | O-antigen five: acetylal |         |
| 4128 | CHIP3351 | STM specil | 1 | 0 | STM0763 |      | transcriptional regulato |         |
| 4129 | CHIP0484 | STM/STY    | 1 | 1 | STM0740 | cydA | cytochromε               | STY0786 |
| 4130 | CHIP0534 | STM/STY    | 1 | 1 | STM2873 | prgI | cell invasio             | STY2994 |
| 4131 | CHIP0527 | STM/STY    | 1 | 1 | STM2799 | stpA | DNA-bindir               | STY2920 |
| 4132 | CHIP0496 | STM/STY    | 1 | 1 | STM3727 | rpmG | 50S riboso               | STY4067 |
| 4133 | CHIP0699 | STM/STY    | 1 | 1 | STM2676 | rpsP | 30S riboso               | STY2863 |
| 4134 | CHIP4427 | STM/STY    | 1 | 1 | STM0541 | ybcJ | putative cy              | STY0587 |
| 4135 | CHIP1021 | STM/STY    | 1 | 1 | STM1706 | yciH | putative tra             | STY1345 |
| 4136 | CHIP1038 | STM/STY    | 1 | 0 | STM1699 | ycjE | putative cytoplasmic pr  |         |
| 4137 | CHIP1032 | STM/STY    | 1 | 1 | STM1966 | yedF | putative tra             | STY2174 |
| 4138 | CHIP4511 | STM/STY    | 1 | 1 | STM1592 | ydcY | putative cy              | STY1473 |
| 4139 | CHIP0042 | STM/STY    | 1 | 0 | STM3944 |      | putative inr             | STY3615 |
| 4140 | CHIP0070 | STM/STY    | 1 | 1 | STM3910 | ppiC | peptidyl-prε             | STY3647 |
| 4141 | CHIP1161 | STM/STY    | 1 | 1 | STM0982 | himD | integration              | STY0982 |
| 4142 | CHIP4182 | STM specil | 1 | 0 | STM2937 | ygbF | putative inner membra    |         |
| 4143 | CHIP2094 | STM/STY    | 1 | 1 | STM3675 | sgbH | putative 3-I             | STY4121 |
| 4144 | CHIP3936 | STM specil | 1 | 0 | STM1358 | aroD | 3-dehydroquinat dehy     |         |
| 4145 | CHIP3929 | STM specil | 1 | 0 | STM1351 | ydiT | putative ferredoxin      |         |
| 4146 | CHIP4732 | STM/STY    | 1 | 0 | STM3945 |      | pseudogene; 2 frames     |         |
| 4147 | CHIP3609 | STM/STY    | 1 | 1 | STM4336 | ecnB | putative en              | STY4696 |
| 4148 | CHIP4330 | STM/STY    | 1 | 1 | STM4599 | yjjY | putative inr             | STY4948 |
| 4149 | CHIP4332 | STM/STY    | 1 | 1 | STM0001 | thrL | thr operon               | STY0001 |



|      |          |            |   |   |         |      |                          |
|------|----------|------------|---|---|---------|------|--------------------------|
| 4150 | CHIP4327 | STM/STY    | 1 | 0 | STM4462 | yjgG | putative cytoplasmic pr  |
| 4151 | CHIP4505 | STM/STY    | 1 | 0 | STM1722 | trpL | trp operon leader pepti  |
| 4152 | CHIP4499 | STM specil | 1 | 0 | STM1281 |      | putative inner membra    |
| 4153 | CHIP3185 | STM/STY    | 1 | 1 | STM3197 | glgS | glycogen b STY3376       |
| 4154 | CHIP3229 | STM/STY    | 1 | 1 | STM3293 | secG | preprotein : STY3471     |
| 4155 | CHIP3427 | STM/STY    | 1 | 1 | STM0873 | ybjC | putative inr STY0906     |
| 4156 | CHIP3492 | STM/STY    | 1 | 0 | STM0971 |      | putative cytoplasmic pr  |
| 4157 | CHIP3438 | STM specil | 1 | 0 | STM0894 |      | Fels-1 prophage; putat   |
| 4158 | CHIP3329 | STM/STY    | 1 | 1 | STM0719 |      | putative UI STY0759      |
| 4159 | CHIP1062 | STM specil | 1 | 0 | PSLT032 |      | putative diguanylate cy  |
| 4160 | CHIP1102 | STM specil | 1 | 0 | PSLT093 |      | conjugative transfer:    |
| 4161 | CHIP1071 | STM specil | 1 | 0 | PSLT056 |      | putative cytoplasmic pr  |
| 4162 | CHIP1111 | STM specil | 1 | 0 | PSLT102 | traS | conjugative transfer: su |
| 4163 | CHIP0171 | STM specil | 1 | 0 | PSLT080 | traK | conjugative transfer: as |
| 4164 | CHIP0428 | STM specil | 1 | 0 | PSLT008 | srgC | sdiA-regulated gene;pu   |
| 4165 | CHIP4753 | STM/STY    | 0 | 0 |         |      |                          |
| 4166 | CHIP4757 | STM specil | 1 | 0 | PSLT108 | tral | conjugative transfer: or |
| 4167 | CHIP4761 | STM/STY    | 1 | 1 | STM0032 |      | putative anj STY0039     |
| 4168 | CHIP4765 | STM/STY    | 0 | 0 |         |      |                          |
| 4169 | CHIP4769 | STM/STY    | 0 | 0 |         |      |                          |
| 4170 | CHIP4773 | STM/STY    | 0 | 0 |         |      |                          |
| 4171 | CHIP4849 | STM/STY    | 0 | 0 |         |      |                          |
| 4172 | CHIP4853 | STM/STY    | 0 | 0 |         |      |                          |
| 4173 | CHIP4857 | STM/STY    | 0 | 0 |         |      |                          |
| 4174 | CHIP4861 | STM/STY    | 0 | 0 |         |      |                          |
| 4175 | CHIP4865 | STM specil | 0 | 0 |         |      |                          |
| 4176 | CTRL004  | none       | 0 | 0 |         |      |                          |
| 4177 | CHIP5198 | STY specif | 0 | 1 |         |      | STY3189                  |
| 4178 | CHIP5128 | STY specif | 0 | 1 |         |      | STY2069                  |
| 4179 | CHIP5144 | STY specif | 0 | 1 |         |      | STY2299                  |
| 4180 | CHIP5248 | STY specif | 0 | 1 |         |      | STY3686                  |
| 4181 | CHIP5182 | STY specif | 0 | 1 |         |      | STY3064                  |
| 4182 | CHIP4919 | STY specif | 0 | 1 |         |      | STY0207                  |
| 4183 | CHIP5212 | STY specif | 0 | 1 |         |      | STY3345                  |
| 4184 | CHIP5228 | STY specif | 0 | 1 |         |      | STY3664                  |
| 4185 | CHIP5242 | STM/STY    | 0 | 0 |         |      | STY3680                  |
| 4186 | CHIP5176 | STY specif | 0 | 0 |         |      | STY2887                  |
| 4187 | CHIP4913 | STY specif | 0 | 1 |         |      | STY0201                  |
| 4188 | CHIP4929 | STY specif | 0 | 1 |         |      | STY0314                  |
| 4189 | CHIP5230 | STY specif | 0 | 1 |         |      | STY3666                  |
| 4190 | CHIP5244 | STY specif | 0 | 1 |         |      | STY3682                  |
| 4191 | CHIP5259 | STM/STY    | 0 | 0 |         |      | STY3706                  |
| 4192 | CHIP5274 | STY specif | 0 | 1 |         |      | STY4075                  |
| 4193 | CHIP5018 | STY specif | 0 | 1 |         |      | STY1593                  |
| 4194 | CHIP5034 | STY specif | 0 | 1 |         |      | STY1610                  |
| 4195 | CHIP5166 | STY specif | 0 | 1 |         |      | STY2750                  |
| 4196 | CHIP5180 | STM/STY    | 0 | 1 |         |      | STY2906                  |
| 4197 | CHIP5277 | STM/STY    | 0 | 0 |         |      |                          |
| 4198 | CHIP5378 | STM/STY    | 0 | 0 |         |      |                          |
| 4199 | CHIP5394 | STY specif | 0 | 1 |         |      | STY4668                  |
| 4200 | CHIP5409 | STY specif | 0 | 1 |         |      | STY4821                  |
| 4201 | CHIP5316 | STY specif | 0 | 1 |         |      | STY4549                  |

|      |          |            |   |   |         |      |                              |
|------|----------|------------|---|---|---------|------|------------------------------|
| 4202 | CHIP5330 | STY specif | 0 | 1 |         |      | STY4569                      |
| 4203 | CHIP5428 | STY specif | 0 | 1 |         |      | STY4850                      |
| 4204 | CHIP5368 | STY specif | 0 | 1 |         |      | STY4619                      |
| 4205 | CHIP5380 | STY specif | 0 | 1 |         |      | STY4648                      |
| 4206 | CHIP5391 | STY specif | 0 | 1 |         |      | STY4665                      |
| 4207 | buffer   | none       | 0 | 0 |         |      |                              |
| 4208 | empty    | none       | 0 | 0 |         |      |                              |
| 4209 | empty    | none       | 0 | 0 |         |      |                              |
| 4210 | empty    | none       | 0 | 0 |         |      |                              |
| 4211 | empty    | none       | 0 | 0 |         |      |                              |
| 4212 | empty    | none       | 0 | 0 |         |      |                              |
| 4213 | CHIP3321 | STM/STY    | 1 | 0 | STM0703 | kdpD | sensory kir STY0744          |
| 4214 | CHIP2578 | STM/STY    | 1 | 1 | STM3833 |      | putative m $\alpha$ STY3945  |
| 4215 | CHIP2594 | STM/STY    | 1 | 1 | STM3856 | pstC | ABC super STY3927            |
| 4216 | CHIP2610 | STM/STY    | 1 | 1 | STM3888 | yieP | putative re $\zeta$ STY3888  |
| 4217 | CHIP0843 | STM/STY    | 1 | 1 | STM1778 | lolB | outer mem STY1904            |
| 4218 | CHIP0859 | STM/STY    | 1 | 1 | STM0111 | leuC | 3-isopropyl STY0130          |
| 4219 | CHIP2628 | STM/STY    | 1 | 1 | STM0042 |      | putative so STY0050          |
| 4220 | CHIP2660 | STM/STY    | 1 | 1 | STM0119 | yabB | putative cy $\beta$ STY0139  |
| 4221 | CHIP2676 | STM/STY    | 1 | 1 | STM0150 | aroP | APC family STY0173           |
| 4222 | CHIP2692 | STM specif | 1 | 0 | STM0176 | stiB | putative fimbrial chapa      |
| 4223 | CHIP2708 | STM specif | 1 | 0 | STM0201 |      | putative outer membra        |
| 4224 | CHIP2724 | STM/STY    | 1 | 1 | STM0238 | yaeP | putative cy $\beta$ STY0263  |
| 4225 | CHIP3254 | STM/STY    | 1 | 1 | STM3346 | yhcM | putative AT STY3526          |
| 4226 | CHIP3270 | STM/STY    | 1 | 1 | STM3381 | yhdT | putative inr STY3561         |
| 4227 | CHIP3286 | STM/STY    | 1 | 1 | STM0647 | rlpB | a minor lip $\alpha$ STY0698 |
| 4228 | CHIP3302 | STM/STY    | 1 | 1 | STM0671 | yleB | putative m $\alpha$ STY0717  |
| 4229 | CHIP3318 | STM/STY    | 1 | 1 | STM0700 | potE | APC family STY0738           |
| 4230 | CHIP0784 | STM/STY    | 1 | 1 | STM1962 | fliT | flagellar bic STY2170        |
| 4231 | CHIP3896 | STM/STY    | 1 | 1 | STM1285 | yeaG | putative Se STY1831          |
| 4232 | CHIP4009 | STM/STY    | 1 | 0 | STM2115 | wcaA | putative gly STY2328         |
| 4233 | CHIP4033 | STM/STY    | 1 | 1 | STM2718 |      | Fels-2 pro $\zeta$ STY4623   |
| 4234 | CHIP4057 | STM specif | 1 | 0 | STM2750 |      | putative PTS system, $\zeta$ |
| 4235 | CHIP4073 | STM specif | 1 | 0 | STM2766 |      | putative cytoplasmic pr      |
| 4236 | CHIP4089 | STM/STY    | 1 | 1 | STM2792 | gabT | 4-aminobu $\beta$ STY2912    |
| 4237 | CHIP3739 | STM/STY    | 1 | 1 | STM4597 |      | putative pe STY4946          |
| 4238 | CHIP3755 | STM specif | 1 | 0 | STM0284 |      | putative shiga-like toxir    |
| 4239 | CHIP4067 | STM specif | 1 | 0 | STM2760 |      | putative integrase           |
| 4240 | CHIP3795 | STM/STY    | 1 | 1 | STM1057 | pepN | aminopepti STY1078           |
| 4241 | CHIP2379 | STM/STY    | 1 | 1 | STM1495 | ynfl | putative co STY1569          |
| 4242 | CHIP2395 | STM/STY    | 1 | 1 | STM3452 | yheO | putative re $\zeta$ STY4346  |
| 4243 | CHIP3797 | STM/STY    | 1 | 1 | STM1060 |      | putative iro STY1081         |
| 4244 | CHIP2373 | STM/STY    | 1 | 1 | STM1456 | ydgO | putative ox STY1666          |
| 4245 | CHIP2389 | STM/STY    | 1 | 1 | STM3421 | rpLO | 50S riboso $\beta$ STY4377   |
| 4246 | CHIP2405 | STM/STY    | 1 | 1 | STM3467 | yhfK | putative inr STY4329         |
| 4247 | CHIP2421 | STM/STY    | 1 | 1 | STM3500 | pckA | phosphoen STY4296            |
| 4248 | CHIP3885 | STM/STY    | 1 | 1 | STM1265 |      | putative re $\zeta$ STY1856  |
| 4249 | CHIP3831 | STM/STY    | 1 | 0 | STM1128 |      | putative so STY1164          |
| 4250 | CHIP3855 | STM/STY    | 1 | 1 | STM1199 | yceG | putative pe STY1238          |
| 4251 | CHIP3871 | STM/STY    | 1 | 1 | STM1218 | ycfV | ABC trans $\zeta$ STY1258    |
| 4252 | CHIP2447 | STM/STY    | 1 | 1 | STM3542 | gntK | gluconate $\beta$ STY4269    |
| 4253 | CHIP3520 | STM specif | 1 | 0 | STM1029 |      | Gifsy-2 prophage             |

|      |          |            |   |   |         |      |                         |
|------|----------|------------|---|---|---------|------|-------------------------|
| 4254 | CHIP3544 | STM specil | 1 | 0 | STM4202 |      | putative phage basepla  |
| 4255 | CHIP4106 | STM/STY    | 1 | 1 | STM4057 |      | putative inr STY3814    |
| 4256 | CHIP4122 | STM/STY    | 1 | 1 | STM4090 | menA | 1,4-dihydro STY3780     |
| 4257 | CHIP4146 | STM/STY    | 1 | 1 | STM4129 | trmA | tRNA (urac STY3745      |
| 4258 | CHIP4162 | STM/STY    | 1 | 1 | STM2907 | pphB | serine/thre STY3030     |
| 4259 | CHIP3610 | STM/STY    | 1 | 1 | STM4337 | ecnR | putative ba STY4697     |
| 4260 | CHIP3050 | STM/STY    | 1 | 1 | STM2391 | fadL | transport o STY2623     |
| 4261 | CHIP3436 | STM/STY    | 1 | 1 | STM0891 | artP | ABC super STY0924       |
| 4262 | CHIP3076 | STM/STY    | 1 | 1 | STM2472 | maeB | paral putati STY2709    |
| 4263 | CHIP3092 | STM/STY    | 1 | 1 | STM2494 |      | putative inr STY2735    |
| 4264 | CHIP3116 | STM/STY    | 1 | 1 | STM2551 |      | putative inr STY2797    |
| 4265 | CHIP4109 | STM/STY    | 1 | 0 | STM4065 |      | putative pe STY3805     |
| 4266 | CHIP4125 | STM/STY    | 1 | 1 | STM4098 |      | putative ar STY3771     |
| 4267 | CHIP4159 | STM specil | 1 | 0 | STM2903 |      | putative cytoplasmic pr |
| 4268 | CHIP4175 | STM/STY    | 1 | 1 | STM2926 | pcm  | L-isoaspart STY3051     |
| 4269 | CHIP4191 | STM/STY    | 1 | 1 | STM2953 | pyrG | CTP synth STY3082       |
| 4270 | CHIP3439 | STM specil | 1 | 0 | STM0895 |      | Fels-1 prophage         |
| 4271 | CHIP3455 | STM specil | 0 | 0 |         |      |                         |
| 4272 | CHIP3471 | STM specil | 1 | 0 | STM0928 | nanH | sialidase (neuraminida  |
| 4273 | CHIP2349 | STM/STY    | 1 | 1 | STM1310 | nadE | NAD synth STY1803       |
| 4274 | CHIP2365 | STM/STY    | 1 | 1 | STM1437 | ydhM | putative tra STY1685    |
| 4275 | CHIP2954 | STM/STY    | 1 | 1 | STM1984 | yodD | putative cy STY2192     |
| 4276 | CHIP3650 | STM specil | 1 | 0 | STM4423 |      | putative AraC-type DN.  |
| 4277 | CHIP2994 | STM/STY    | 1 | 1 | STM2285 | glpB | sn-glycerol STY2514     |
| 4278 | CHIP3690 | STM/STY    | 1 | 1 | STM4499 | yeeN | putative cy STY4855     |
| 4279 | CHIP3684 | STM specil | 1 | 0 | STM4493 |      | putative cytoplasmic pr |
| 4280 | CHIP3700 | STM/STY    | 1 | 0 | STM4518 |      | putative inner membra   |
| 4281 | CHIP2280 | STM/STY    | 1 | 1 | STM1136 | ycdX | putative Hi STY1173     |
| 4282 | CHIP2296 | STM/STY    | 1 | 1 | STM1296 | ydjA | putative ox STY1818     |
| 4283 | CHIP2312 | STM/STY    | 1 | 1 | STM1446 | ydhH | putative cy STY1676     |
| 4284 | CHIP0253 | STM/STY    | 1 | 1 | STM1470 | tus  | replication STY1652     |
| 4285 | CHIP2314 | STM/STY    | 1 | 1 | STM1476 | ydgC | putative inr STY1646    |
| 4286 | CHIP2330 | STM/STY    | 1 | 1 | STM1154 | yceE | putative Mf STY1191     |
| 4287 | CHIP0271 | STM/STY    | 1 | 1 | STM2864 | sitD | Salmonella STY2986      |
| 4288 | CHIP2370 | STM/STY    | 1 | 1 | STM1453 | nth  | endonucle STY1669       |
| 4289 | CHIP2959 | STM/STY    | 1 | 1 | STM1990 | yedA | putative pe STY2198     |
| 4290 | CHIP2975 | STM/STY    | 1 | 1 | STM2074 | hisB | bifunctiona STY2283     |
| 4291 | CHIP3905 | STM/STY    | 1 | 1 | STM1298 | topB | DNA topois STY1816      |
| 4292 | CHIP0498 | STM/STY    | 1 | 1 | STM1444 | slyA | transcriptio STY1678    |
| 4293 | CHIP3953 | STM/STY    | 1 | 1 | STM1433 | ydhD | putative glt STY1689    |
| 4294 | CHIP3969 | STM/STY    | 1 | 1 | STM1466 | ydgA | putative pe STY1656     |
| 4295 | CHIP0562 | STM/STY    | 1 | 1 | STM1415 | ssaN | Secretion s STY1705     |
| 4296 | CHIP1413 | STM/STY    | 1 | 1 | STM3875 | mioC | initiation of STY3903   |
| 4297 | CHIP1319 | STM/STY    | 1 | 1 | STM3782 |      | putative PT STY4000     |
| 4298 | CHIP1431 | STM/STY    | 1 | 1 | STM2578 | pdxJ | carries out STY2824     |
| 4299 | CHIP1455 | STM/STY    | 1 | 1 | STM0398 | phoR | sensory kir STY0433     |
| 4300 | CHIP1471 | STM/STY    | 1 | 1 | STM4183 | aceB | malate syn STY4401      |
| 4301 | CHIP1399 | STM/STY    | 1 | 1 | STM0069 | caiE | stimulates STY0079      |
| 4302 | CHIP3916 | STM/STY    | 1 | 1 | STM1322 | yniC | putative en STY1789     |
| 4303 | CHIP3918 | STM/STY    | 1 | 1 | STM1330 |      | putative Df STY1781     |
| 4304 | CHIP0511 | STM/STY    | 1 | 1 | STM1981 | fliR | putative fla STY2189    |
| 4305 | CHIP3966 | STM/STY    | 1 | 1 | STM1462 | ydgJ | putative ox STY1660     |

|      |          |            |   |   |         |        |                         |         |
|------|----------|------------|---|---|---------|--------|-------------------------|---------|
| 4306 | CHIP3982 | STM/STY    | 1 | 1 | STM1489 | ynfK   | putative de             | STY1575 |
| 4307 | CHIP0575 | STM/STY    | 1 | 1 | STM2371 | flk    | Couples flæ             | STY2602 |
| 4308 | CHIP1434 | STM/STY    | 1 | 1 | STM2573 |        | putative ke             | STY2819 |
| 4309 | CHIP3160 | STM specil | 1 | 0 | STM2617 |        | Gifsy-1 prophage: simi  |         |
| 4310 | CHIP3176 | STM/STY    | 1 | 1 | STM3180 | ygiN   | putative cyf            | STY3358 |
| 4311 | CHIP2060 | STM/STY    | 1 | 1 | STM3570 | ftsE   | putative AT             | STY4241 |
| 4312 | CHIP2076 | STM/STY    | 1 | 1 | STM3482 | gph    | phosphoglj              | STY4314 |
| 4313 | CHIP0970 | STM/STY    | 1 | 1 | STM0346 |        | putative ou             | STY0380 |
| 4314 | CHIP0986 | STM/STY    | 1 | 1 | STM1382 | orf408 | putative reç            | STY1739 |
| 4315 | CHIP1559 | STM/STY    | 1 | 1 | STM0465 | ybaY   | glycoprotei             | STY0509 |
| 4316 | CHIP1591 | STM/STY    | 1 | 1 | STM0559 | rflb   | putative gly            | STY0607 |
| 4317 | CHIP1999 | STM/STY    | 1 | 1 | STM4414 | ppa    | inorganic p             | STY4773 |
| 4318 | CHIP2015 | STM/STY    | 1 | 1 | STM4532 | yjiY   | putative ca             | STY4890 |
| 4319 | CHIP3179 | STM/STY    | 1 | 1 | STM3189 | ygiD   | putative cyf            | STY3367 |
| 4320 | CHIP3195 | STM/STY    | 1 | 1 | STM3219 | fadH   | 2,4-dieonyl             | STY3397 |
| 4321 | CHIP3197 | STM/STY    | 1 | 1 | STM3221 | ygiP   | putative mε             | STY3401 |
| 4322 | CHIP2073 | STM/STY    | 1 | 1 | STM3491 | yrfC   | putative inr            | STY4305 |
| 4323 | CHIP1522 | STM/STY    | 1 | 1 | STM2338 | pta    | phosphotra              | STY2568 |
| 4324 | CHIP1546 | STM/STY    | 1 | 1 | STM2553 | csiE   | stationary ç            | STY2800 |
| 4325 | CHIP1570 | STM/STY    | 1 | 1 | STM0529 | fdrA   | putative ac             | STY0577 |
| 4326 | CHIP1586 | STM/STY    | 1 | 1 | STM0528 | allD   | ureidoglycc             | STY0576 |
| 4327 | CHIP0745 | STM/STY    | 1 | 1 | STM2909 | mutS   | methyl-dire             | STY3033 |
| 4328 | CHIP1812 | STM/STY    | 1 | 1 | STM4060 | cpxP   | periplasmic             | STY3811 |
| 4329 | CHIP1844 | STM/STY    | 1 | 1 | STM0663 | gltK   | ABC super               | STY0708 |
| 4330 | CHIP1884 | STM/STY    | 1 | 1 | STM3406 | def    | peptide def             | STY4391 |
| 4331 | CHIP0682 | STM/STY    | 1 | 1 | STM2582 | lepB   | leader pepf             | STY2828 |
| 4332 | CHIP0698 | STM/STY    | 1 | 1 | STM2078 | hisl   | bifunctiona             | STY2287 |
| 4333 | CHIP1823 | STM/STY    | 1 | 1 | STM4009 | typA   | GTP-bindir              | STY3871 |
| 4334 | CHIP1855 | STM/STY    | 1 | 1 | STM0879 | potH   | ABC super               | STY0912 |
| 4335 | CHIP1887 | STM/STY    | 1 | 1 | STM3410 | mscL   | mechanosε               | STY4387 |
| 4336 | CHIP0597 | STM specil | 1 | 0 | STM2772 | hin    | H inversion: regulation |         |
| 4337 | CHIP0709 | STM/STY    | 1 | 1 | STM1184 | flgL   | flagellar bic           | STY1223 |
| 4338 | CHIP0725 | STM/STY    | 1 | 1 | STM2580 | era    | GTPase bε               | STY2826 |
| 4339 | CHIP0592 | STM/STY    | 1 | 1 | STM3614 | dctA   | DAACS far               | STY4189 |
| 4340 | CHIP0704 | STM/STY    | 1 | 1 | STM2555 | glyA   | serine hydr             | STY2802 |
| 4341 | CHIP0640 | STM/STY    | 0 | 1 |         |        |                         | STY1159 |
| 4342 | CHIP0664 | STM/STY    | 1 | 1 | STM1467 | manA   | mannose-ε               | STY1655 |
| 4343 | CHIP1827 | STM/STY    | 1 | 1 | STM0867 |        | putative hy             | STY0900 |
| 4344 | CHIP1859 | STM/STY    | 1 | 1 | STM0836 | ybiR   | putative Di             | STY0877 |
| 4345 | CHIP4706 | STM/STY    | 1 | 1 | STM1858 |        | putative cyf            | STY1993 |
| 4346 | CHIP4722 | STM/STY    | 1 | 1 | STM2173 |        | putative cyf            | STY2403 |
| 4347 | CHIP3333 | STM/STY    | 1 | 1 | STM0725 |        | putative gly            | STY0767 |
| 4348 | CHIP1222 | STM/STY    | 1 | 1 | STM4304 | dcuS   | sensory hiε             | STY4502 |
| 4349 | CHIP1238 | STM/STY    | 1 | 1 | STM1938 | yecA   | putative mε             | STY2146 |
| 4350 | CHIP1262 | STM/STY    | 1 | 1 | STM1679 | mppA   | periplasmic             | STY1384 |
| 4351 | CHIP1264 | STM/STY    | 1 | 1 | STM1688 | pspC   | phage shoε              | STY1373 |
| 4352 | CHIP0453 | STM/STY    | 1 | 1 | STM4262 |        | putative AE             | STY4460 |
| 4353 | CHIP1304 | STM/STY    | 1 | 1 | STM0048 | slpA   | FKBP-type               | STY0057 |
| 4354 | CHIP4685 | STM/STY    | 1 | 1 | STM1025 |        | Gifsy-2 pro             | STY1039 |
| 4355 | CHIP4701 | STM/STY    | 1 | 1 | STM1649 |        | putative cyf            | STY1420 |
| 4356 | CHIP0142 | STM/STY    | 1 | 1 | STM4019 | yihQ   | putative alç            | STY3859 |
| 4357 | CHIP0136 | STM/STY    | 1 | 1 | STM3567 | livJ   | ABC super               | STY4244 |

|      |          |            |   |   |         |             |                          |          |
|------|----------|------------|---|---|---------|-------------|--------------------------|----------|
| 4358 | CHIP4735 | STM/STY    | 1 | 0 | STM2728 | Fels-2 proç | STY3669                  |          |
| 4359 | CHIP3760 | STM/STY    | 0 | 0 |         |             |                          |          |
| 4360 | CHIP0400 | STM/STY    | 1 | 1 | STM2436 | ptsJ        | putative reç             | STY2674  |
| 4361 | CHIP1251 | STM/STY    | 1 | 1 | STM1903 | yecE        | putative cy              | STY2111  |
| 4362 | CHIP0440 | STM/STY    | 1 | 1 | STM4260 |             | membrane                 | STY4457  |
| 4363 | CHIP1733 | STM/STY    | 1 | 1 | STM3019 | yqeF        | putative ac              | STY3164  |
| 4364 | CHIP0922 | STM/STY    | 1 | 1 | STM3209 | rpsU        | 30S riboso               | STY3388  |
| 4365 | CHIP1773 | STM/STY    | 1 | 1 | STM2877 | iagB        | cell invasio             | STY3000  |
| 4366 | CHIP0019 | STM/STY    | 1 | 1 | STM3968 | udp         | uridine pho              | STY3591  |
| 4367 | CHIP0920 | STM/STY    | 1 | 1 | STM3838 | dnaA        | DNA replic               | STY3940  |
| 4368 | CHIP2181 | STM/STY    | 1 | 1 | STM3063 | rpiA        | ribosephos               | STY3219  |
| 4369 | CHIP0053 | STM/STY    | 1 | 1 | STM3929 | wecG        | putative UI              | STY3626  |
| 4370 | CHIP2249 | STM/STY    | 1 | 1 | STM3100 | yggS        | putative en              | STY3253  |
| 4371 | CHIP0093 | STM/STY    | 1 | 1 | STM4152 | rplL        | 50S riboso               | STY3733  |
| 4372 | CHIP0877 | STM/STY    | 1 | 1 | STM0543 | fimA        | major type               | STY0589  |
| 4373 | CHIP0893 | STM/STY    | 1 | 1 | STM1916 | cheY        | chemotaxis               | STY2125  |
| 4374 | CHIP0909 | STM/STY    | 1 | 1 | STM4004 | hemN        | O <sub>2</sub> -indep    | STY3877  |
| 4375 | CHIP1762 | STM/STY    | 1 | 1 | STM3014 | lysR        | positive tra             | STY3158  |
| 4376 | CHIP1794 | STM/STY    | 1 | 1 | STM4011 |             | putative inr             | STY3869  |
| 4377 | CHIP0040 | STM/STY    | 1 | 1 | STM3947 | dapF        | diaminopir               | STY3612  |
| 4378 | CHIP0080 | STM/STY    | 1 | 0 | STM3899 | yifB        | putative mç              | STY3657  |
| 4379 | CHIP0872 | STM/STY    | 0 | 0 | STM1959 | fliC        | flagellar biosynthesis;  | f        |
| 4380 | CHIP0888 | STM/STY    | 1 | 1 | STM2946 | cysH        | 3'-phospho               | STY3074  |
| 4381 | CHIP2769 | STM/STY    | 1 | 1 | STM1567 | adhP        | alcohol def              | STY1493  |
| 4382 | CHIP2793 | STM/STY    | 1 | 1 | STM1610 | ydcK        | putative nu              | STY1454  |
| 4383 | CHIP2817 | STM/STY    | 1 | 1 | STM1646 | ydbH        | putative pe              | STY1423  |
| 4384 | CHIP2833 | STM/STY    | 1 | 1 | STM1671 |             | putative ba              | STY1393  |
| 4385 | CHIP1142 | STM/STY    | 1 | 1 | STM1542 |             | putative zir             | STY1520  |
| 4386 | CHIP1158 | STM/STY    | 1 | 1 | STM1510 | ydfH        | putative reç             | STY1551  |
| 4387 | CHIP1168 | STM/STY    | 1 | 1 | STM1000 | asnS        | asparagine               | STY1004  |
| 4388 | CHIP4452 | STM/STY    | 1 | 1 | STM0590 | fepC        | ABC s+upç                | STY0634  |
| 4389 | CHIP4476 | STM/STY    | 1 | 1 | STM0339 | stbB        | putative fir             | STY0372  |
| 4390 | CHIP2860 | STM/STY    | 1 | 1 | STM1741 |             | putative vo              | STY1310  |
| 4391 | CHIP2780 | STM/STY    | 1 | 1 | STM1589 | yncB        | putative N/              | STY1476  |
| 4392 | CHIP2900 | STM/STY    | 1 | 1 | STM1835 | rrmA        | 23S rRNA                 | STY1964  |
| 4393 | CHIP2806 | STM specil | 1 | 0 | STM1629 |             | putative dipicolinate re |          |
| 4394 | CHIP2926 | STM/STY    | 1 | 1 | STM1884 | eda         | multifunctic             | STYkdgA  |
| 4395 | CHIP2942 | STM/STY    | 1 | 1 | STM1932 | ftnB        | ferritin-like            | STY2141  |
| 4396 | CHIP4407 | STM/STY    | 1 | 1 | STM0515 | allA        | ureidoglycc              | STYglxA2 |
| 4397 | CHIP4423 | STM/STY    | 1 | 1 | STM0537 | cysS        | cysteine tR              | STY0585  |
| 4398 | CHIP4439 | STM specil | 1 | 0 | STM0572 |             | putative phosphosugar    |          |
| 4399 | CHIP4345 | STM/STY    | 1 | 1 | STM0393 | yajF        | putative su              | STY0426  |
| 4400 | CHIP4281 | STM/STY    | 1 | 1 | STM3150 | hypO        | putative Ni/             | STY3321  |
| 4401 | CHIP4585 | STM/STY    | 1 | 1 | STM2831 | mltB        | membrane                 | STY2952  |
| 4402 | CHIP2489 | STM/STY    | 1 | 1 | STM3632 |             | putative PC              | STY4165  |
| 4403 | CHIP4625 | STM/STY    | 1 | 1 | STM4509 |             | putative cy              | STY4865  |
| 4404 | CHIP4649 | STM/STY    | 1 | 1 | STM2395 | pgtE        | Phosphoglç               | STY2632  |
| 4405 | CHIP2539 | STM/STY    | 1 | 1 | STM3765 | yicL        | putative pe              | STY4021  |
| 4406 | CHIP4212 | STM/STY    | 1 | 1 | STM2992 | argA        | N-alpha-ac               | STY3130  |
| 4407 | CHIP4228 | STM/STY    | 1 | 1 | STM3026 |             | putative ou              | STY3174  |
| 4408 | CHIP4260 | STM/STY    | 1 | 1 | STM3105 | yggM        | putative pe              | STY3258  |
| 4409 | CHIP4380 | STM/STY    | 1 | 1 | STM0464 | tesB        | acyl-CoA tç              | STY0508  |

|      |          |            |   |   |         |      |                            |         |
|------|----------|------------|---|---|---------|------|----------------------------|---------|
| 4410 | CHIP4596 | STM/STY    | 1 | 1 | STM2803 |      | putative re                | STY2926 |
| 4411 | CHIP2526 | STM/STY    | 1 | 1 | STM3725 | kdtB | phosphopa                  | STY4069 |
| 4412 | CHIP4199 | STM/STY    | 1 | 1 | STM2972 | exo  | exonuclea                  | STY3111 |
| 4413 | CHIP4223 | STM/STY    | 1 | 1 | STM3018 | kdul | putative pe                | STY3163 |
| 4414 | CHIP4247 | STM specil | 1 | 0 | STM3081 |      | putative malate/L-lacta    |         |
| 4415 | CHIP4271 | STM/STY    | 1 | 1 | STM3125 |      | putative cy                | STY3294 |
| 4416 | CHIP4583 | STM/STY    | 1 | 1 | STM2829 | recA | DNA stranc                 | STY2950 |
| 4417 | CHIP1669 | STM/STY    | 1 | 1 | STM2117 | wzb  | putative pr                | STY2330 |
| 4418 | CHIP1685 | STM/STY    | 1 | 0 | STM2243 |      | putative tail fiber protei |         |
| 4419 | CHIP2085 | STM/STY    | 1 | 1 | STM3712 | rfaC | heptosyl tr                | STY4083 |
| 4420 | CHIP1917 | STM/STY    | 1 | 1 | STM3436 | rpsS | 30S riboso                 | STY4362 |
| 4421 | CHIP2133 | STM/STY    | 1 | 1 | STM3329 | yhcC | putative Fe                | STY3508 |
| 4422 | CHIP2149 | STM/STY    | 1 | 1 | STM3251 |      | putative su                | STY3433 |
| 4423 | CHIP2111 | STM/STY    | 1 | 1 | STM3592 | yhiP | putative PC                | STY4211 |
| 4424 | CHIP2127 | STM/STY    | 1 | 1 | STM0951 |      | putative cy                | STY0949 |
| 4425 | CHIP1959 | STM/STY    | 1 | 1 | STM4444 |      | putative inr               | STY4783 |
| 4426 | CHIP1975 | STM/STY    | 1 | 1 | STM4570 | deoD | purine-nucl                | STY4921 |
| 4427 | CHIP4484 | STM specil | 1 | 0 | STM0352 |      | putative cation efflux p   |         |
| 4428 | CHIP4500 | STM/STY    | 1 | 1 | STM1300 |      | putative pe                | STY1814 |
| 4429 | CHIP1985 | STM/STY    | 1 | 1 | STM4328 | yjeH | putative tra               | STY4688 |
| 4430 | CHIP1618 | STM/STY    | 1 | 1 | STM2819 | yqaA | putative inr               | STY2945 |
| 4431 | CHIP4526 | STM/STY    | 1 | 1 | STM2196 |      | putative D-                | STY2430 |
| 4432 | CHIP4542 | STM specil | 1 | 0 | STM2233 |      | putative cytoplasmic pr    |         |
| 4433 | CHIP4558 | STM/STY    | 1 | 1 | STM2151 | stcB | putative pe                | STY2380 |
| 4434 | CHIP4574 | STM/STY    | 1 | 1 | STM2179 |      | putative su                | STY2409 |
| 4435 | CHIP0361 | STM/STY    | 1 | 1 | STM1400 | sseC | Secretion                  | STY1720 |
| 4436 | CHIP2268 | STM/STY    | 1 | 1 | STM1069 | ycbG | putative cy                | STY1090 |
| 4437 | CHIP3352 | STM specil | 1 | 0 | STM0764 |      | transcriptional regulato   |         |
| 4438 | CHIP3400 | STM/STY    | 1 | 1 | STM0834 | ybiP | putative Int               | STY0875 |
| 4439 | CHIP0306 | STM/STY    | 1 | 1 | STM1302 | xthA | exonuclea                  | STY1812 |
| 4440 | CHIP2213 | STM/STY    | 1 | 1 | STM3250 | garD | galactarate                | STY3432 |
| 4441 | CHIP3387 | STM/STY    | 1 | 1 | STM0815 | ybhR | putative AE                | STY0850 |
| 4442 | CHIP2184 | STM/STY    | 1 | 1 | STM3056 | visC | putative m                 | STY3212 |
| 4443 | CHIP0317 | STM/STY    | 1 | 1 | STM1958 | fliB | N-methylat                 | STYnml  |
| 4444 | CHIP2224 | STM/STY    | 1 | 1 | STM3224 | ygjT | putative re                | STY3404 |
| 4445 | CHIP2256 | STM/STY    | 1 | 1 | STM3075 |      | putative AE                | STY3233 |
| 4446 | CHIP2272 | STM/STY    | 1 | 1 | STM1097 |      | putative pe                | STY1129 |
| 4447 | CHIP0312 | STM/STY    | 1 | 1 | STM2875 | hilD | regulatory I               | STY2996 |
| 4448 | CHIP0328 | STM/STY    | 1 | 1 | STM3758 | fidL | putative inr               | STY4029 |
| 4449 | CHIP2235 | STM/STY    | 1 | 1 | STM3167 |      | putative di                | STY3341 |
| 4450 | CHIP0368 | STM/STY    | 1 | 1 | STM1406 | ssaG | Secretion                  | STY1714 |
| 4451 | CHIP2275 | STM/STY    | 1 | 1 | STM1107 | hpaX | 4-hydroxyp                 | STY1141 |
| 4452 | CHIP3359 | STM/STY    | 1 | 1 | STM0778 | modF | putative AE                | STY0811 |
| 4453 | CHIP1552 | STM/STY    | 1 | 1 | STM2484 |      | putative inr               | STY2722 |
| 4454 | CHIP1529 | STM/STY    | 1 | 1 | STM2539 | hscA | chaperone                  | STY2785 |
| 4455 | CHIP1554 | STM/STY    | 1 | 1 | STM2482 | yffB | putative glt               | STY2720 |
| 4456 | CHIP1579 | STM/STY    | 1 | 1 | STM0480 | ybaM | putative inr               | STY0524 |
| 4457 | CHIP1696 | STM/STY    | 1 | 1 | STM1797 | ymgE | putative tra               | STY1925 |
| 4458 | CHIP3536 | STM/STY    | 1 | 1 | STM4194 | yjbD | putative cy                | STY4411 |
| 4459 | CHIP2014 | STM/STY    | 1 | 1 | STM4531 | yjiX | putative cy                | STY4889 |
| 4460 | CHIP2067 | STM/STY    | 1 | 1 | STM3525 | glpE | thiosulfate/               | STY4278 |
| 4461 | CHIP2116 | STM/STY    | 1 | 1 | STM3565 | yhhK | putative ac                | STY4247 |

|      |          |            |   |   |         |                       |                           |         |
|------|----------|------------|---|---|---------|-----------------------|---------------------------|---------|
| 4462 | CHIP3598 | STM/STY    | 1 | 1 | STM4314 | putative ba           | STY4514                   |         |
| 4463 | CHIP3559 | STM specil | 1 | 0 | STM4218 | putative inner membra |                           |         |
| 4464 | CHIP4041 | STM/STY    | 1 | 1 | STM2731 | Fels-2 proç           | STY4638                   |         |
| 4465 | CHIP2498 | STM/STY    | 1 | 1 | STM3658 | yiaH                  | putative inr              | STY4140 |
| 4466 | CHIP3728 | STM specil | 1 | 0 | STM4574 |                       | putative outer membra     |         |
| 4467 | CHIP3775 | STM/STY    | 1 | 1 | STM0318 | yafA                  | putative hy               | STY0363 |
| 4468 | CHIP1311 | STM/STY    | 1 | 1 | STM0004 | thrC                  | threonine s               | STY0004 |
| 4469 | CHIP3979 | STM/STY    | 1 | 1 | STM1485 |                       | acid shock                | STY1582 |
| 4470 | CHIP3956 | STM/STY    | 0 | 0 |         |                       |                           | STY1684 |
| 4471 | CHIP2621 | STM/STY    | 1 | 1 | STM0030 |                       | putative tra              | STY0036 |
| 4472 | CHIP2637 | STM/STY    | 1 | 1 | STM0064 | dapB                  | dihydrodipi               | STY0073 |
| 4473 | CHIP2622 | STM/STY    | 1 | 0 | STM0031 |                       | putative tra              | STY0038 |
| 4474 | CHIP2623 | STM/STY    | 1 | 1 | STM0034 |                       | putative ou               | STY0041 |
| 4475 | CHIP4498 | STM/STY    | 1 | 1 | STM1159 | yceO                  | putative inr              | STY1197 |
| 4476 | CHIP3096 | STM specil | 1 | 0 | STM2508 |                       | putative cytoplasmic pr   |         |
| 4477 | CHIP3217 | STM/STY    | 1 | 1 | STM3272 | yhbS                  | putative AE               | STY3455 |
| 4478 | CHIP3198 | STM/STY    | 1 | 1 | STM3232 | yqjF                  | putative mε               | STY3412 |
| 4479 | CHIP3443 | STM specil | 1 | 0 | STM0899 |                       | Fels-1 prophage           |         |
| 4480 | CHIP3500 | STM/STY    | 1 | 1 | STM0987 | ycaR                  | putative inr              | STY0989 |
| 4481 | CHIP3462 | STM specil | 1 | 0 | STM0919 |                       | Fels-1 prophage; putat    |         |
| 4482 | CHIP3346 | STM/STY    | 1 | 1 | STM0757 | pnuC                  | NMN famil;                | STY0798 |
| 4483 | CHIP1070 | STM specil | 1 | 0 | PSLT053 | parB                  | plasmid partition protei  |         |
| 4484 | CHIP1110 | STM specil | 1 | 0 | PSLT101 | traG                  | conjugative transfer: as  |         |
| 4485 | CHIP1079 | STM specil | 1 | 0 | PSLT065 |                       | pseudogene; two fram      |         |
| 4486 | CHIP0169 | STM specil | 1 | 0 | PSLT077 | traA                  | conjugative transfer: fir |         |
| 4487 | CHIP0419 | STM specil | 1 | 0 | PSLT017 | pefC                  | plasmid-encoded fimbr     |         |
| 4488 | CHIP0421 | STM specil | 1 | 0 | PSLT014 | orf6                  | putative outer membra     |         |
| 4489 | CHIP4754 | STM specil | 1 | 0 | PSLT059 |                       | putative adenine-speci    |         |
| 4490 | CHIP4758 | STM/STY    | 1 | 1 | STM1919 | cheM                  | methyl acc                | STY2128 |
| 4491 | CHIP4762 | STM/STY    | 0 | 0 |         |                       |                           |         |
| 4492 | CHIP4766 | STM/STY    | 0 | 0 |         |                       |                           |         |
| 4493 | CHIP4770 | STM/STY    | 0 | 0 |         |                       |                           |         |
| 4494 | CHIP4774 | STM/STY    | 1 | 1 | STM0291 |                       | putative Rf               | STY0321 |
| 4495 | CHIP4850 | STM/STY    | 0 | 0 |         |                       |                           |         |
| 4496 | CHIP4854 | STM/STY    | 0 | 0 |         |                       |                           |         |
| 4497 | CHIP4858 | STM specil | 0 | 0 |         |                       |                           |         |
| 4498 | CHIP4862 | STM specil | 0 | 0 |         |                       |                           |         |
| 4499 | CHIP4866 | STM/STY    | 0 | 0 |         |                       |                           |         |
| 4500 | CTRL005  | none       | 0 | 0 |         |                       |                           |         |
| 4501 | CHIP5112 | STY specif | 0 | 1 |         |                       |                           | STY2053 |
| 4502 | CHIP5218 | STM/STY    | 0 | 1 |         |                       |                           | STY3632 |
| 4503 | CHIP5233 | STY specif | 0 | 1 |         |                       |                           | STY3670 |
| 4504 | CHIP5255 | STY specif | 0 | 0 |         |                       |                           | STY2889 |
| 4505 | CHIP5271 | STY specif | 0 | 1 |         |                       |                           | STY3950 |
| 4506 | CHIP5014 | STM/STY    | 0 | 1 |         |                       |                           | STY1545 |
| 4507 | CHIP5130 | STY specif | 0 | 1 |         |                       |                           | STY2071 |
| 4508 | CHIP5146 | STY specif | 0 | 1 |         |                       |                           | STY2349 |
| 4509 | CHIP5162 | STM/STY    | 0 | 0 |         |                       |                           |         |
| 4510 | CHIP5265 | STY specif | 0 | 1 |         |                       |                           | STY3918 |
| 4511 | CHIP5008 | STY specif | 0 | 1 |         |                       |                           | STY1361 |
| 4512 | CHIP5024 | STY specif | 0 | 1 |         |                       |                           | STY1599 |
| 4513 | CHIP5148 | STY specif | 0 | 1 |         |                       |                           | STY2351 |

|      |          |            |   |   |         |       |                         |
|------|----------|------------|---|---|---------|-------|-------------------------|
| 4514 | CHIP5164 | STY specif | 0 | 1 |         |       | STY2748                 |
| 4515 | CHIP5178 | STY specif | 0 | 0 |         |       |                         |
| 4516 | CHIP4915 | STY specif | 0 | 1 |         |       | STY0203                 |
| 4517 | CHIP4931 | STY specif | 0 | 1 |         |       | STY0323                 |
| 4518 | CHIP4947 | STM/STY    | 0 | 1 |         |       | STY0479                 |
| 4519 | CHIP5253 | STY specif | 0 | 1 |         |       | STY3692                 |
| 4520 | CHIP5269 | STY specif | 0 | 1 |         |       | STY3948                 |
| 4521 | CHIP5283 | STY specif | 0 | 1 |         |       | STY4208                 |
| 4522 | CHIP5297 | STY specif | 0 | 1 |         |       | STY4521                 |
| 4523 | CHIP5320 | STY specif | 0 | 1 |         |       | STY4554                 |
| 4524 | CHIP5334 | STY specif | 0 | 1 |         |       | STY4573                 |
| 4525 | CHIP5397 | STY specif | 0 | 1 |         |       | STY4672                 |
| 4526 | CHIP5413 | STY specif | 0 | 1 |         |       | STY4825                 |
| 4527 | CHIP5354 | STY specif | 0 | 1 |         |       | STY4594                 |
| 4528 | CHIP5287 | STY specif | 0 | 1 |         |       | STY4222                 |
| 4529 | CHIP5302 | STY specif | 0 | 1 |         |       | STY4526                 |
| 4530 | CHIP5317 | STY specif | 0 | 1 |         |       | STY4550                 |
| 4531 | buffer   | none       | 0 | 0 |         |       |                         |
| 4532 | empty    | none       | 0 | 0 |         |       |                         |
| 4533 | empty    | none       | 0 | 0 |         |       |                         |
| 4534 | empty    | none       | 0 | 0 |         |       |                         |
| 4535 | empty    | none       | 0 | 0 |         |       |                         |
| 4536 | empty    | none       | 0 | 0 |         |       |                         |
| 4537 | CHIP0771 | STM/STY    | 1 | 1 | STM2895 | invB  | surface pre STY3018     |
| 4538 | CHIP0795 | STM/STY    | 1 | 1 | STM0488 | adk   | adenylate t STY0532     |
| 4539 | CHIP0811 | STM/STY    | 1 | 1 | STM2027 | cbiH  | synthesis c STY2232     |
| 4540 | CHIP0827 | STM/STY    | 1 | 1 | STM3788 | uhpC  | membrane STY3994        |
| 4541 | CHIP2634 | STM/STY    | 1 | 1 | STM0060 | citE2 | putative cit STY0069    |
| 4542 | CHIP2650 | STM/STY    | 1 | 1 | STM0090 | ksgA  | S-adenosyl STY0105      |
| 4543 | CHIP0845 | STM/STY    | 1 | 1 | STM0231 | dnaE  | DNA polymr STY0254      |
| 4544 | CHIP3236 | STM/STY    | 1 | 1 | STM3306 | nlp   | regulatory f STY3485    |
| 4545 | CHIP3252 | STM/STY    | 1 | 1 | STM3344 | rpsI  | 30S riboso STY3524      |
| 4546 | CHIP3268 | STM/STY    | 1 | 1 | STM3377 |       | putative nit STY3557    |
| 4547 | CHIP3284 | STM/STY    | 1 | 1 | STM0639 | mrdB  | rod shape- STY0690      |
| 4548 | CHIP3300 | STM/STY    | 1 | 1 | STM0662 | glfL  | ABC super STY0707       |
| 4549 | CHIP2686 | STM/STY    | 1 | 1 | STM0169 | gcd   | glucose de STY0191      |
| 4550 | CHIP2702 | STM/STY    | 1 | 1 | STM0188 | ligT  | 2'-5' RNA li STY0213    |
| 4551 | CHIP2718 | STM/STY    | 1 | 1 | STM0224 | yaeT  | putative ou STY0247     |
| 4552 | CHIP2734 | STM/STY    | 1 | 1 | STM1508 | ydfI  | putative m: STY1553     |
| 4553 | CHIP2750 | STM/STY    | 1 | 1 | STM1540 |       | putative hy STY1522     |
| 4554 | CHIP2575 | STM specif | 1 | 0 | STM3830 | dgoR  | galactonate operon tra  |
| 4555 | CHIP2456 | STM/STY    | 1 | 1 | STM3569 | ftsX  | putative int STY4242    |
| 4556 | CHIP3721 | STM/STY    | 1 | 1 | STM4559 | yjjG  | putative ha STY4909     |
| 4557 | CHIP3745 | STM/STY    | 1 | 1 | STM0257 |       | putative drı STY0278    |
| 4558 | CHIP3769 | STM/STY    | 1 | 1 | STM0309 | yafH  | putative ac STY0354     |
| 4559 | CHIP3785 | STM specif | 1 | 0 | STM0332 |       | putative hydrolase or a |
| 4560 | CHIP3801 | STM/STY    | 1 | 1 | STM1068 | lonH  | putative prı STY1089    |
| 4561 | CHIP4035 | STM/STY    | 1 | 0 | STM2720 |       | Fels-2 prophage: simil: |
| 4562 | CHIP3763 | STM specif | 1 | 0 | STM0294 |       | putative cytoplasmic pr |
| 4563 | CHIP4075 | STM specif | 1 | 0 | STM2768 |       | putative transposase    |
| 4564 | CHIP3803 | STM/STY    | 1 | 1 | STM1073 | yccS  | putative eff STY1095    |
| 4565 | CHIP3827 | STM/STY    | 1 | 1 | STM1119 | wraB  | trp-repress STY1155     |



|      |          |            |   |   |         |      |                          |         |
|------|----------|------------|---|---|---------|------|--------------------------|---------|
| 4566 | CHIP3843 | STM/STY    | 1 | 1 | STM1156 | yceA | putative en              | STY1193 |
| 4567 | CHIP4093 | STM/STY    | 1 | 1 | STM3994 | mobA | putative mc              | STY3886 |
| 4568 | CHIP3821 | STM/STY    | 1 | 1 | STM1104 | hpaF | 4-hydroxyp               | STY1138 |
| 4569 | CHIP3837 | STM/STY    | 1 | 1 | STM1138 | ycdZ | putative inr             | STY1175 |
| 4570 | CHIP3853 | STM/STY    | 1 | 1 | STM1196 | acpP | acyl carrier             | STY1235 |
| 4571 | CHIP3869 | STM/STY    | 1 | 1 | STM1216 | mfd  | transcriptio             | STY1256 |
| 4572 | CHIP2445 | STM/STY    | 1 | 1 | STM3538 | glgB | 1,4-alpha-ç              | STY4272 |
| 4573 | CHIP3839 | STM/STY    | 1 | 1 | STM1150 | mdoG | periplasmic              | STY1187 |
| 4574 | CHIP2415 | STM/STY    | 1 | 1 | STM3495 | yrfF | putative inr             | STY4301 |
| 4575 | CHIP2431 | STM specil | 1 | 0 | STM3519 | rtcB | putative cytoplasmic pr  |         |
| 4576 | CHIP3895 | STM/STY    | 1 | 1 | STM1283 | yeaJ | putative Mç              | STY1834 |
| 4577 | CHIP4096 | STM/STY    | 1 | 1 | STM4012 |      | putative co              | STY3867 |
| 4578 | CHIP4120 | STM/STY    | 1 | 1 | STM4087 | glpF | MIP chann                | STY3783 |
| 4579 | CHIP3538 | STM specil | 1 | 0 | STM4196 |      | putative cytoplasmic pr  |         |
| 4580 | CHIP3554 | STM specil | 1 | 0 | STM4212 |      | putative phage tail core |         |
| 4581 | CHIP3578 | STM/STY    | 1 | 1 | STM4268 | yjcD | putative xa              | STY4466 |
| 4582 | CHIP3594 | STM/STY    | 1 | 1 | STM4305 |      | putative an              | STY4503 |
| 4583 | CHIP4186 | STM specil | 1 | 0 | STM2941 | yghJ | putative cytoplasmic pr  |         |
| 4584 | CHIP3434 | STM/STY    | 1 | 1 | STM0889 | artQ | ABC super                | STY0922 |
| 4585 | CHIP3060 | STM/STY    | 1 | 1 | STM2415 | gltX | glutamate t              | STY2654 |
| 4586 | CHIP3460 | STM specil | 1 | 0 | STM0917 |      | Fels-1 prophage; putat   |         |
| 4587 | CHIP3476 | STM/STY    | 1 | 1 | STM0939 | ybjD | homology \               | STY0935 |
| 4588 | CHIP3508 | STM/STY    | 1 | 1 | STM1002 |      | putatiave d              | STY1006 |
| 4589 | CHIP3541 | STM specil | 1 | 0 | STM4199 |      | putative cytoplasmic pr  |         |
| 4590 | CHIP4133 | STM specil | 1 | 0 | STM4110 | ptsA | General PTS family, er   |         |
| 4591 | CHIP3591 | STM/STY    | 1 | 1 | STM4290 | proP | MFS family               | STY4489 |
| 4592 | CHIP3607 | STM/STY    | 1 | 1 | STM4334 | efp  | elongation               | STY4694 |
| 4593 | CHIP3047 | STM/STY    | 1 | 1 | STM2383 | mepA | murein DD                | STY2615 |
| 4594 | CHIP3063 | STM/STY    | 1 | 1 | STM2423 | yfeN | putative ou              | STY2659 |
| 4595 | CHIP3079 | STM/STY    | 1 | 1 | STM2476 | ypfG | putative pe              | STY2713 |
| 4596 | CHIP3095 | STM/STY    | 0 | 0 | STM2506 |      | putative inner membra    |         |
| 4597 | CHIP0274 | STM/STY    | 1 | 1 | STM2876 | hilA | invasion ge              | STY2999 |
| 4598 | CHIP3618 | STM/STY    | 1 | 1 | STM4351 |      | putative arç             | STY4711 |
| 4599 | CHIP3634 | STM/STY    | 1 | 1 | STM4392 | priB | primosoma                | STY4748 |
| 4600 | CHIP2978 | STM/STY    | 1 | 1 | STM2259 | napA | periplasmic              | STY2485 |
| 4601 | CHIP3674 | STM/STY    | 1 | 0 | STM4482 | idnT | GntP family, L-idonate   |         |
| 4602 | CHIP3018 | STM/STY    | 1 | 1 | STM2335 | yfbU | putative cy              | STY2565 |
| 4603 | CHIP3012 | STM/STY    | 1 | 1 | STM2326 | nuoC | NADH deh                 | STY2556 |
| 4604 | CHIP3708 | STM specil | 1 | 0 | STM4534 |      | putative NtrC family tra |         |
| 4605 | CHIP0205 | STM/STY    | 1 | 1 | STM1954 | fliY | putative pe              | STY2162 |
| 4606 | CHIP0221 | STM/STY    | 1 | 1 | STM3443 | bfr  | bacteriofer              | STY4355 |
| 4607 | CHIP2320 | STM/STY    | 1 | 1 | STM1074 | yccF | putative inr             | STY1096 |
| 4608 | CHIP2336 | STM/STY    | 1 | 1 | STM1222 | potD | ABC super                | STY1262 |
| 4609 | CHIP0239 | STM/STY    | 1 | 1 | STM2468 | eutQ | putative etf             | STY2704 |
| 4610 | CHIP2338 | STM/STY    | 1 | 1 | STM1225 | potB | ABC super                | STY1265 |
| 4611 | CHIP2354 | STM/STY    | 1 | 1 | STM1328 |      | putative ou              | STY1783 |
| 4612 | CHIP3623 | STM/STY    | 1 | 1 | STM4371 | yjfJ | putative Ph              | STY4728 |
| 4613 | CHIP3639 | STM/STY    | 1 | 1 | STM4405 | ytfJ | putative tra             | STY4763 |
| 4614 | CHIP3655 | STM specil | 1 | 0 | STM4428 |      | putative permease        |         |
| 4615 | CHIP0482 | STM/STY    | 1 | 1 | STM1145 | csgC | putative cu              | STY1182 |
| 4616 | CHIP0506 | STM/STY    | 1 | 1 | STM1862 | pagO | PhoPQ-act                | STY2000 |
| 4617 | CHIP0530 | STM/STY    | 1 | 1 | STM1751 | hns  | DNA-bindir               | STY1299 |

|      |          |            |   |   |         |       |                        |         |
|------|----------|------------|---|---|---------|-------|------------------------|---------|
| 4618 | CHIP0546 | STM/STY    | 1 | 1 | STM1173 | flgA  | flagellar bic          | STY1212 |
| 4619 | CHIP3993 | STM specil | 1 | 0 | STM2087 | rfbV  | LPS side chain defect: |         |
| 4620 | CHIP1325 | STM/STY    | 1 | 1 | STM3796 | ilvB  | acetolactat            | STY3986 |
| 4621 | CHIP1415 | STM/STY    | 1 | 1 | STM3864 | atpC  | membrane               | STY3914 |
| 4622 | CHIP1439 | STM/STY    | 1 | 1 | STM2641 | nadB  | quinolinate            | STY2834 |
| 4623 | CHIP1367 | STM/STY    | 1 | 1 | STM0243 | yaeB  | paral putati           | STY0270 |
| 4624 | CHIP1383 | STM/STY    | 1 | 1 | STM0094 | djIA  | DnaJ like c            | STY0109 |
| 4625 | CHIP1495 | STM/STY    | 1 | 1 | STM2382 | yfcA  | putative pe            | STY2614 |
| 4626 | CHIP3924 | STM/STY    | 1 | 1 | STM1344 | ydiV  | putative Di            | STY1766 |
| 4627 | CHIP3926 | STM/STY    | 1 | 1 | STM1348 | ydiA  | putative inr           | STY1762 |
| 4628 | CHIP0519 | STM/STY    | 1 | 1 | STM0999 | ompF  | outer mem              | STY1002 |
| 4629 | CHIP0543 | STM/STY    | 1 | 1 | STM3562 | livM  | ABC super              | STY4250 |
| 4630 | CHIP0559 | STM/STY    | 1 | 1 | STM1412 | ssaL  | Secretion $\epsilon$   | STY1708 |
| 4631 | CHIP1330 | STM/STY    | 1 | 1 | STM2257 | napH  | ferredoxin-            | STY2483 |
| 4632 | CHIP1346 | STM/STY    | 0 | 0 | STM0279 |       | putative cyI           | STY0302 |
| 4633 | CHIP2020 | STM/STY    | 1 | 1 | STM4556 | rsmC  | 16S rRNA               | STY4906 |
| 4634 | CHIP2044 | STM/STY    | 1 | 1 | STM3644 | bisC  | biotin sulfo           | STY4158 |
| 4635 | CHIP3208 | STM/STY    | 1 | 1 | STM3257 |       | putative ta            | STY3439 |
| 4636 | CHIP3224 | STM/STY    | 1 | 1 | STM3281 | nlpl  | lipoprotein,           | STY3462 |
| 4637 | CHIP1517 | STM/STY    | 1 | 1 | STM2414 | yfeD  | putative ne            | STY2653 |
| 4638 | CHIP1533 | STM/STY    | 0 | 0 |         |       |                        | STY2766 |
| 4639 | CHIP1567 | STM/STY    | 1 | 1 | STM0510 | sfbA  | putative AE            | STY0558 |
| 4640 | CHIP1599 | STM/STY    | 1 | 1 | STM0606 | ybdO  | putative tra           | STY0651 |
| 4641 | CHIP3147 | STM specil | 1 | 0 | STM2603 |       | Gifsy-1 prophage: simi |         |
| 4642 | CHIP2023 | STM/STY    | 1 | 1 | STM4576 | lplA  | lipoate-proI           | STY4923 |
| 4643 | CHIP2039 | STM/STY    | 1 | 1 | STM3667 | yiaJ  | transcriptio           | STY4131 |
| 4644 | CHIP2055 | STM/STY    | 1 | 1 | STM3606 | yhjB  | putative tra           | STY4197 |
| 4645 | CHIP2057 | STM/STY    | 1 | 1 | STM3602 |       | putative re            | STY4201 |
| 4646 | CHIP3221 | STM specil | 1 | 0 | STM3277 |       | putative inner membra  |         |
| 4647 | CHIP0983 | STM/STY    | 1 | 1 | STM4457 |       | putative tra           | STY4797 |
| 4648 | CHIP1015 | STM/STY    | 1 | 1 | STM1379 | orf48 | putative an            | STY1743 |
| 4649 | CHIP1031 | STM/STY    | 1 | 1 | STM4293 | yjdB  | putative int           | STY4492 |
| 4650 | CHIP1047 | STM/STY    | 1 | 1 | STM1169 | mviM  | putative vir           | STY1207 |
| 4651 | CHIP0753 | STM/STY    | 1 | 1 | STM2458 | eutB  | ethanolami             | STY2695 |
| 4652 | CHIP1820 | STM/STY    | 1 | 1 | STM4028 | yihZ  | D-Tyr-tRN/             | STY3850 |
| 4653 | CHIP1852 | STM/STY    | 1 | 1 | STM0633 | lipA  | lipoate syn            | STY0683 |
| 4654 | CHIP0578 | STM/STY    | 1 | 1 | STM1420 | ssaS  | Secretion $\epsilon$   | STY1700 |
| 4655 | CHIP0594 | STM/STY    | 1 | 1 | STM2035 | cbiA  | synthesis c            | STY2240 |
| 4656 | CHIP0610 | STM/STY    | 1 | 1 | STM3699 | cysE  | serine acet            | STY4096 |
| 4657 | CHIP1831 | STM/STY    | 1 | 1 | STM0811 | ybhN  | putative ne            | STY0846 |
| 4658 | CHIP1863 | STM/STY    | 1 | 1 | STM0783 | modC  | ABC super              | STY0816 |
| 4659 | CHIP0581 | STM/STY    | 1 | 1 | STM1378 | pykF  | pyruvate ki            | STY1744 |
| 4660 | CHIP0693 | STM/STY    | 1 | 1 | STM2351 | hisP  | ABC super              | STY2581 |
| 4661 | CHIP0621 | STM/STY    | 1 | 1 | STM0113 | leuA  | 2-isopropyl            | STY0132 |
| 4662 | CHIP0637 | STM/STY    | 1 | 1 | STM0209 | htrA  | periplasmic            | STY0231 |
| 4663 | CHIP0688 | STM/STY    | 1 | 1 | STM0451 | hupB  | DNA-bindir             | STY0493 |
| 4664 | CHIP0624 | STM/STY    | 1 | 1 | STM3409 | trkA  | Trk system             | STY4388 |
| 4665 | CHIP0736 | STM/STY    | 1 | 1 | STM2881 | iacP  | putative ac            | STY3004 |
| 4666 | CHIP0760 | STM/STY    | 1 | 1 | STM0546 | fimD  | outer mem              | STY0593 |
| 4667 | CHIP1835 | STM/STY    | 1 | 1 | STM0729 | abrB  | putative tra           | STY0772 |
| 4668 | CHIP1867 | STM/STY    | 1 | 1 | STM0739 | sucD  | succinyl-C $\alpha$    | STY0782 |
| 4669 | CHIP0131 | STM/STY    | 1 | 1 | STM4174 | hydG  | response r             | STY3711 |

|      |          |            |   |   |         |      |                       |         |
|------|----------|------------|---|---|---------|------|-----------------------|---------|
| 4670 | CHIP0147 | STM/STY    | 1 | 1 | STM3593 | yhiQ | putative SA           | STY4210 |
| 4671 | CHIP0179 | STM/STY    | 1 | 1 | STM2040 | pduC | Propanedic            | STY2245 |
| 4672 | CHIP0395 | STM/STY    | 1 | 0 | STM2883 | sipD | cell invasion         | protein |
| 4673 | CHIP0411 | STM/STY    | 1 | 1 | STM2322 | nuoH | NADH deh              | STY2552 |
| 4674 | CHIP1270 | STM/STY    | 1 | 1 | STM3364 | yhcP | putative inr          | STY3545 |
| 4675 | CHIP0437 | STM/STY    | 0 | 0 |         |      |                       | STY4452 |
| 4676 | CHIP1288 | STM/STY    | 1 | 1 | STM2669 | tyrA | bifunctiona           | STY2856 |
| 4677 | CHIP0477 | STM/STY    | 1 | 1 | STM1140 | csgF | curli produ           | STY1177 |
| 4678 | CHIP0110 | STM/STY    | 1 | 1 | STM4024 | yihV | putative su           | STY3854 |
| 4679 | CHIP0126 | STM/STY    | 1 | 1 | STM4169 | yjaG | putative cyf          | STY3716 |
| 4680 | CHIP4733 | STM/STY    | 1 | 1 | STM2846 | hycH | processing            | STY2968 |
| 4681 | CHIP0144 | STM/STY    | 1 | 1 | STM4017 | yihO | putative Gf           | STY3861 |
| 4682 | CHIP0160 | STM/STY    | 1 | 1 | STM0670 | miaB | methylthiol           | STY0716 |
| 4683 | CHIP4375 | STM/STY    | 1 | 1 | STM0456 | ybaE | putative AE           | STY0498 |
| 4684 | CHIP1235 | STM/STY    | 1 | 1 | STM4277 | nrfA | nitrite redu          | STY4475 |
| 4685 | CHIP1259 | STM/STY    | 1 | 1 | STM1669 |      | homology t            | STY1395 |
| 4686 | CHIP1275 | STM/STY    | 1 | 1 | STM3383 | prmA | methylator            | STY3563 |
| 4687 | CHIP1741 | STM/STY    | 1 | 1 | STM2988 | mltA | membrane              | STY3128 |
| 4688 | CHIP1757 | STM/STY    | 1 | 1 | STM2916 | ygbL | putative fuc          | STY3041 |
| 4689 | CHIP1781 | STM/STY    | 1 | 1 | STM4058 | cpxA | sensory kir           | STY3813 |
| 4690 | CHIP0512 | STM/STY    | 1 | 1 | STM0864 | deoR | transcriptio          | STY0897 |
| 4691 | CHIP0043 | STM/STY    | 1 | 1 | STM3943 | cyaY | putative Fr           | STY3616 |
| 4692 | CHIP0075 | STM/STY    | 1 | 1 | STM3904 | ilvD | dihydroxya            | STY3653 |
| 4693 | CHIP1401 | STM/STY    | 1 | 1 | STM0073 | caiA | putative ac           | STY0083 |
| 4694 | CHIP0077 | STM/STY    | 1 | 1 | STM3902 | ilvM | acetolactat           | STY3655 |
| 4695 | CHIP3102 | STM/STY    | 1 | 0 | STM2524 | yfgA | paral putati          | STY2769 |
| 4696 | CHIP1712 | STM/STY    | 1 | 1 | STM1814 | minC | cell divisior         | STY1944 |
| 4697 | CHIP1728 | STM/STY    | 1 | 1 | STM1730 | yciE | putative cyf          | STY1321 |
| 4698 | CHIP1744 | STM/STY    | 1 | 1 | STM2974 | fucA | L-fucose-             | STY3113 |
| 4699 | CHIP1770 | STM/STY    | 1 | 1 | STM2936 | iap  | aminopepti            | STY3061 |
| 4700 | CHIP0024 | STM/STY    | 0 | 0 | STM3963 | yigM | paral putati          | STY3596 |
| 4701 | CHIP0048 | STM/STY    | 1 | 1 | STM3938 | hemC | porphobilin           | STY3621 |
| 4702 | CHIP0088 | STM/STY    | 1 | 1 | STM4147 | secE | preprotein            | STY3738 |
| 4703 | CHIP1707 | STM/STY    | 1 | 1 | STM1826 | sdaA | L-serine de           | STY1956 |
| 4704 | CHIP1723 | STM/STY    | 1 | 1 | STM1771 | chaA | CaCA fami             | STY1281 |
| 4705 | CHIP2873 | STM/STY    | 1 | 1 | STM1781 | yhcM | putative Su           | STY1907 |
| 4706 | CHIP2897 | STM/STY    | 1 | 1 | STM1832 | manZ | Sugar Spe             | STY1961 |
| 4707 | CHIP2921 | STM/STY    | 1 | 1 | STM1874 |      | putative inr          | STY2080 |
| 4708 | CHIP2937 | STM/STY    | 1 | 1 | STM1901 | aspS | aspartate t           | STY2109 |
| 4709 | CHIP4410 | STM/STY    | 1 | 1 | STM0518 | gip  | glyoxylate            | STY0566 |
| 4710 | CHIP4426 | STM/STY    | 1 | 0 | STM0540 | ybcI | putative m            | STY0586 |
| 4711 | CHIP4436 | STM/STY    | 1 | 0 | STM0567 |      | putative AT           | STY0615 |
| 4712 | CHIP1192 | STM/STY    | 1 | 1 | STM1584 | ansP | APC family            | STY1481 |
| 4713 | CHIP1216 | STM/STY    | 1 | 1 | STM1618 |      | putative tra          | STY1446 |
| 4714 | CHIP2764 | STM/STY    | 1 | 0 | STM1558 |      | putative gly          | STY1505 |
| 4715 | CHIP2884 | STM/STY    | 1 | 1 | STM1803 | dadA | D-amino ac            | STY1931 |
| 4716 | CHIP2804 | STM specil | 1 | 0 | STM1627 |      | alcohol dehydrogenase |         |
| 4717 | CHIP2814 | STM/STY    | 1 | 0 | STM1639 | cybB | cytochrom             | STY1431 |
| 4718 | CHIP2830 | STM/STY    | 1 | 1 | STM1667 |      | putative thi          | STY1397 |
| 4719 | CHIP2846 | STM/STY    | 1 | 1 | STM1703 | yciR | putative PA           | STY1349 |
| 4720 | CHIP1147 | STM/STY    | 1 | 1 | STM0626 | dpiA | response r            | STY0675 |
| 4721 | CHIP1163 | STM/STY    | 1 | 1 | STM0985 | lpxK | tetraacyldis          | STY0986 |

|      |          |            |   |   |         |      |                          |
|------|----------|------------|---|---|---------|------|--------------------------|
| 4722 | CHIP1179 | STM/STY    | 1 | 1 | STM0963 | serS | serine tRN, STY0961      |
| 4723 | CHIP4257 | STM/STY    | 1 | 1 | STM3098 |      | putative tra STY3251     |
| 4724 | CHIP4377 | STM/STY    | 1 | 1 | STM0458 |      | putative cy: STY0501     |
| 4725 | CHIP2473 | STM/STY    | 1 | 0 | STM3598 |      | putative L-: STY4203     |
| 4726 | CHIP4609 | STM/STY    | 1 | 1 | STM3048 | ygfZ | putative an STY3204      |
| 4727 | CHIP2513 | STM/STY    | 1 | 1 | STM3684 | yibF | putative glt STY4112     |
| 4728 | CHIP2537 | STM/STY    | 1 | 0 | STM3755 | rhuM | putative cytoplasmic pr  |
| 4729 | CHIP4659 | STM/STY    | 1 | 1 | STM3178 | ygiY | putative se STY3355      |
| 4730 | CHIP4308 | STM/STY    | 1 | 1 | STM2684 | recN | protein use STY2870      |
| 4731 | CHIP4236 | STM/STY    | 1 | 0 | STM3046 | ygfX | putative inr STY3202     |
| 4732 | CHIP4268 | STM specil | 1 | 0 | STM3122 |      | putative arylsulfatase   |
| 4733 | CHIP2468 | STM/STY    | 1 | 1 | STM3585 | yhhJ | putative AE STY4225      |
| 4734 | CHIP2484 | STM/STY    | 1 | 1 | STM3622 | yhjS | putative cy: STY4178     |
| 4735 | CHIP2534 | STM/STY    | 1 | 1 | STM3747 | yicE | putative NC STY4046      |
| 4736 | CHIP4303 | STM/STY    | 1 | 1 | STM2672 | yfiN | putative diç STY2859     |
| 4737 | CHIP4319 | STM/STY    | 1 | 0 | STM2702 |      | Fels-2 proç STY4608      |
| 4738 | CHIP4255 | STM/STY    | 1 | 1 | STM3090 | metK | methionine STY3243       |
| 4739 | CHIP4367 | STM/STY    | 1 | 1 | STM0444 | ampG | MFS family STY0486       |
| 4740 | CHIP2471 | STM specil | 1 | 0 | STM3595 |      | putative phosphatase     |
| 4741 | CHIP4553 | STM/STY    | 1 | 1 | STM2127 | yegN | paral putati STY2340     |
| 4742 | CHIP4569 | STM/STY    | 1 | 1 | STM2171 | yohF | putative ox STY2401      |
| 4743 | CHIP1901 | STM/STY    | 1 | 1 | STM3413 | yhdN | putative cy: STY4385     |
| 4744 | CHIP1925 | STM/STY    | 1 | 1 | STM0942 | ybjZ | putative AE STY0938      |
| 4745 | CHIP1949 | STM/STY    | 1 | 1 | STM4388 | sgaE | putative L-ı STY4744     |
| 4746 | CHIP1965 | STM/STY    | 1 | 1 | STM4479 | yjgP | putative pe STY4817      |
| 4747 | CHIP1927 | STM/STY    | 1 | 1 | STM0931 | ybjR | putative an STY0927      |
| 4748 | CHIP1943 | STM/STY    | 1 | 1 | STM4367 | yjeB | putative ne STY4724      |
| 4749 | CHIP2151 | STM/STY    | 1 | 1 | STM3245 | tdcA | transcriptio STY3428     |
| 4750 | CHIP2167 | STM/STY    | 1 | 1 | STM3147 | hybC | hydrogena: STY3318       |
| 4751 | CHIP1608 | STM/STY    | 1 | 1 | STM2834 | slrB | PTS family STY2955       |
| 4752 | CHIP1624 | STM/STY    | 1 | 1 | STM2842 | hypF | hydrogena: STY2964       |
| 4753 | CHIP4486 | STM specil | 1 | 0 | STM0354 |      | putative transcriptional |
| 4754 | CHIP1626 | STM/STY    | 1 | 1 | STM2848 | hycF | hydrogena: STY2970       |
| 4755 | CHIP1650 | STM/STY    | 1 | 1 | STM2224 | rplY | 50S riboso STY2461       |
| 4756 | CHIP1666 | STM/STY    | 1 | 1 | STM2110 | wcaF | putative ac STY2322      |
| 4757 | CHIP1682 | STM/STY    | 1 | 1 | STM2199 | cirA | outer mem STY2434        |
| 4758 | CHIP1698 | STM/STY    | 1 | 1 | STM1772 | kdsA | 3-deoxy-D- STY1897       |
| 4759 | CHIP2252 | STM/STY    | 1 | 1 | STM3094 | yggJ | putative cy: STY3247     |
| 4760 | CHIP3328 | STM/STY    | 1 | 1 | STM0718 |      | putative cy: STY0758     |
| 4761 | CHIP3376 | STM/STY    | 1 | 1 | STM0798 | uvrB | UvrB with l STY0831      |
| 4762 | CHIP3416 | STM specil | 1 | 0 | STM0857 |      | putative acyl-CoA dehy   |
| 4763 | CHIP2197 | STM/STY    | 1 | 1 | STM3324 | ptsO | NPr, phosç STY3503       |
| 4764 | CHIP0330 | STM/STY    | 1 | 1 | STM3761 | slsA | putative inr STY4025     |
| 4765 | CHIP3403 | STM/STY    | 1 | 1 | STM0838 | ybiT | putative AT STY0879      |
| 4766 | CHIP2192 | STM/STY    | 1 | 1 | STM3348 | degQ | serine endç STY3528      |
| 4767 | CHIP2208 | STM/STY    | 1 | 1 | STM3260 |      | PTS family STY3443       |
| 4768 | CHIP2232 | STM/STY    | 1 | 1 | STM3193 |      | putative thi STY3371     |
| 4769 | CHIP0373 | STM/STY    | 1 | 1 | STM2266 | apbE | putative thi STY2492     |
| 4770 | CHIP3340 | STM/STY    | 1 | 1 | STM0744 | ybgC | putative es STY0790      |
| 4771 | CHIP2203 | STM/STY    | 1 | 1 | STM3300 | dacB | D-alanyl-D- STY3479      |
| 4772 | CHIP2219 | STM/STY    | 1 | 1 | STM3229 | yqjD | putative inr STY3409     |
| 4773 | CHIP0352 | STM/STY    | 1 | 1 | STM3649 | cspA | major cold STY4153       |

|      |          |            |   |   |         |              |                           |         |
|------|----------|------------|---|---|---------|--------------|---------------------------|---------|
| 4774 | CHIP2259 | STM/STY    | 1 | 1 | STM3071 | putative Df  | STY3229                   |         |
| 4775 | CHIP3335 | STM/STY    | 1 | 0 | STM0731 | putative inr | STY0774                   |         |
| 4776 | CHIP3367 | STM/STY    | 1 | 1 | STM0789 | hutC         | histidine uti             | STY0822 |
| 4777 | CHIP0485 | STM/STY    | 1 | 1 | STM0741 | cydB         | cytochromc                | STY0787 |
| 4778 | CHIP0495 | STM/STY    | 1 | 1 | STM3728 | rpmB         | 50S riboso                | STY4066 |
| 4779 | CHIP0535 | STM/STY    | 1 | 1 | STM2872 | prgJ         | cell invasio              | STY2993 |
| 4780 | CHIP0560 | STM/STY    | 1 | 1 | STM1413 | ssaM         | Secretion s               | STY1707 |
| 4781 | CHIP1691 | STM/STY    | 1 | 1 | STM1823 | yoaH         | putative cyf              | STY1953 |
| 4782 | CHIP4435 | STM/STY    | 1 | 1 | STM0565 |              | putative pe               | STY0613 |
| 4783 | CHIP0966 | STM/STY    | 1 | 0 | STM4158 |              | putative cytoplasmic pr   |         |
| 4784 | CHIP0984 | STM/STY    | 1 | 1 | STM1389 | orf319       | putative inr              | STY1731 |
| 4785 | CHIP2124 | STM/STY    | 1 | 1 | STM3507 | yhgG         | putative cyf              | STY4289 |
| 4786 | CHIP0089 | STM/STY    | 1 | 1 | STM4148 | nusG         | componentI                | STY3737 |
| 4787 | CHIP0082 | STM/STY    | 1 | 1 | STM3897 | yifA         | putative tra              | STY3708 |
| 4788 | CHIP0008 | STM/STY    | 1 | 1 | STM3980 |              | putative ou               | STY3579 |
| 4789 | CHIP1209 | STM/STY    | 0 | 0 |         |              |                           |         |
| 4790 | CHIP1193 | STM/STY    | 1 | 1 | STM1590 | yncA         | putative ac               | STY1475 |
| 4791 | CHIP0903 | STM/STY    | 1 | 1 | STM0102 | araA         | L-arabinosi               | STY0119 |
| 4792 | CHIP3968 | STM/STY    | 1 | 0 | STM1465 | malX         | pseudogen                 | STY1657 |
| 4793 | CHIP4690 | STM/STY    | 1 | 1 | STM1248 |              | pseudogen                 | STY1876 |
| 4794 | CHIP4740 | STM/STY    | 1 | 1 | STM2880 |              | putative cyf              | STY3003 |
| 4795 | CHIP4091 | STM/STY    | 1 | 1 | STM2796 | yqaE         | putative Yq               | STY2916 |
| 4796 | CHIP4331 | STM/STY    | 1 | 1 | STM0114 | leuL         | leu operon                | STY0133 |
| 4797 | CHIP4318 | STM/STY    | 1 | 0 | STM2698 |              | Fels-2 proq               | STY4604 |
| 4798 | CHIP4497 | STM/STY    | 1 | 0 | STM0707 |              | putative outer membra     |         |
| 4799 | CHIP2743 | STM/STY    | 0 | 0 | STM1529 |              | putative inner membra     |         |
| 4800 | CHIP4515 | STM/STY    | 1 | 1 | STM3797 | ivbL         | ilvB operon               | STY3985 |
| 4801 | CHIP3226 | STM/STY    | 1 | 1 | STM3288 | yhbC         | putative cyf              | STY3469 |
| 4802 | CHIP3230 | STM/STY    | 1 | 1 | STM3294 | mrsA         | phosphogl                 | STY3472 |
| 4803 | CHIP3515 | STM/STY    | 1 | 1 | STM1022 |              | Gifsy-2 pro               | STY1036 |
| 4804 | CHIP3516 | STM specil | 1 | 0 | STM1023 |              | Gifsy-2 prophage          |         |
| 4805 | CHIP3479 | STM specil | 1 | 0 | STM0947 |              | putative integrase prot   |         |
| 4806 | CHIP3339 | STM/STY    | 1 | 1 | STM0743 | ybgE         | putative inr              | STY0789 |
| 4807 | CHIP1086 | STM specil | 1 | 0 | PSLT072 |              | putative transglycosyla   |         |
| 4808 | CHIP1118 | STM specil | 1 | 0 | PSLT110 | traX         | conjugative transfer: fir |         |
| 4809 | CHIP1087 | STM specil | 1 | 0 | PSLT073 | traM         | conjugative transfer: m   |         |
| 4810 | CHIP0425 | STM/STY    | 1 | 1 | PSLT011 | srgA         | sdiA-regulz               | STY4845 |
| 4811 | CHIP0427 | STM specil | 1 | 0 | PSLT009 | rcK          | resistance to complem     |         |
| 4812 | CHIP0167 | STM specil | 1 | 0 | PSLT075 | traJ         | conjugative transfer: re  |         |
| 4813 | CHIP4755 | STM/STY    | 1 | 0 | STM1861 |              | putative cytoplasmic pr   |         |
| 4814 | CHIP4759 | STM/STY    | 0 | 0 |         |              |                           |         |
| 4815 | CHIP4763 | STM/STY    | 1 | 0 | STM1995 | ompS1        | putative porin            |         |
| 4816 | CHIP4767 | STM/STY    | 0 | 0 |         |              |                           |         |
| 4817 | CHIP4771 | STM/STY    | 0 | 0 |         |              |                           |         |
| 4818 | CHIP4775 | STM/STY    | 1 | 0 | STM2211 | yeiP         | putative elongation fac   |         |
| 4819 | CHIP4851 | STM/STY    | 0 | 0 |         |              |                           |         |
| 4820 | CHIP4855 | STM/STY    | 0 | 0 |         |              |                           |         |
| 4821 | CHIP4859 | STM/STY    | 0 | 0 |         |              |                           |         |
| 4822 | CHIP4863 | STM/STY    | 0 | 0 |         |              |                           |         |
| 4823 | CHIP4867 | STM specil | 1 | 0 | STM1046 |              | Gifsy-2 prophage; prot    |         |
| 4824 | CTRL006  | none       | 0 | 0 |         |              |                           |         |
| 4825 | CHIP5120 | STY specif | 0 | 1 |         |              | STY2061                   |         |

|      |          |            |   |   |         |       |                             |
|------|----------|------------|---|---|---------|-------|-----------------------------|
| 4826 | CHIP5136 | STY specif | 0 | 1 |         |       | STY2077                     |
| 4827 | CHIP5152 | STY specif | 0 | 1 |         |       | STY2356                     |
| 4828 | CHIP5174 | STY specif | 0 | 0 |         |       | STY2885                     |
| 4829 | CHIP4911 | STY specif | 0 | 1 |         |       | STY0115                     |
| 4830 | CHIP4927 | STY specif | 0 | 1 |         |       | STY0312                     |
| 4831 | CHIP5220 | STY specif | 0 | 1 |         |       | STY3644                     |
| 4832 | CHIP5235 | STY specif | 0 | 1 |         |       | STY3672                     |
| 4833 | CHIP5250 | STY specif | 0 | 1 |         |       | STY3688                     |
| 4834 | CHIP5184 | STY specif | 0 | 1 |         |       | STY3066                     |
| 4835 | CHIP4921 | STY specif | 0 | 1 |         |       | STY0296                     |
| 4836 | CHIP4937 | STY specif | 0 | 1 |         |       | STY0345                     |
| 4837 | CHIP5237 | STY specif | 0 | 1 |         |       | STY3674                     |
| 4838 | CHIP5252 | STY specif | 0 | 0 |         |       | STY3690                     |
| 4839 | CHIP5267 | STY specif | 0 | 1 |         |       | STY3922                     |
| 4840 | CHIP5010 | STY specif | 0 | 1 |         |       | STY1367                     |
| 4841 | CHIP5026 | STY specif | 0 | 1 |         |       | STY1601                     |
| 4842 | CHIP5042 | STY specif | 0 | 1 |         |       | STY1618                     |
| 4843 | CHIP5172 | STY specif | 0 | 0 |         |       | STY2883                     |
| 4844 | CHIP5188 | STY specif | 0 | 1 |         |       | STY3070                     |
| 4845 | CHIP5371 | STM/STY    | 0 | 0 |         |       | STY4627                     |
| 4846 | CHIP5383 | STY specif | 0 | 1 |         |       | STY4651                     |
| 4847 | CHIP5401 | STY specif | 0 | 1 |         |       | STY4676                     |
| 4848 | CHIP5417 | STY specif | 0 | 0 |         |       | STY4829                     |
| 4849 | CHIP5324 | STY specif | 0 | 1 |         |       | STY4560                     |
| 4850 | CHIP5338 | STY specif | 0 | 1 |         |       | STY4577                     |
| 4851 | CHIP5436 | STM/STY    | 0 | 1 |         |       | STY4883                     |
| 4852 | CHIP5375 | STM/STY    | 0 | 1 |         |       | STY4635                     |
| 4853 | CHIP5387 | STY specif | 0 | 1 |         |       | STY4656                     |
| 4854 | CHIP5398 | STY specif | 0 | 1 |         |       | STY4673                     |
| 4855 | buffer   | none       | 0 | 0 |         |       |                             |
| 4856 | empty    | none       | 0 | 0 |         |       |                             |
| 4857 | empty    | none       | 0 | 0 |         |       |                             |
| 4858 | empty    | none       | 0 | 0 |         |       |                             |
| 4859 | empty    | none       | 0 | 0 |         |       |                             |
| 4860 | empty    | none       | 0 | 0 |         |       |                             |
| 4861 | CHIP0779 | STM/STY    | 1 | 1 | STM4291 | basS  | sensory kir STY4490         |
| 4862 | CHIP2586 | STM specif | 1 | 0 | STM3844 |       | pseudogene; in-frame        |
| 4863 | CHIP2602 | STM/STY    | 1 | 1 | STM3874 | gidA  | associate v STY3904         |
| 4864 | CHIP0835 | STM/STY    | 1 | 1 | STM3320 | rpoN  | sigma N (s STY3499          |
| 4865 | CHIP0851 | STM/STY    | 1 | 1 | STM3181 | parE  | DNA topois STY3359          |
| 4866 | CHIP3234 | STM/STY    | 1 | 1 | STM3304 | rplU  | 50S riboso STY3483          |
| 4867 | CHIP2636 | STM/STY    | 1 | 1 | STM0063 | citG2 | putative m $\alpha$ STY0072 |
| 4868 | CHIP2668 | STM/STY    | 1 | 1 | STM0134 | lpxC  | UDP-3-O- $\alpha$ STY0154   |
| 4869 | CHIP2684 | STM/STY    | 1 | 1 | STM0167 | yacC  | putative pe STY0189         |
| 4870 | CHIP2700 | STM/STY    | 1 | 1 | STM0185 | yadB  | putative glt STY0210        |
| 4871 | CHIP2716 | STM/STY    | 1 | 1 | STM0222 | cdsA  | CDP-diglyc STY0245          |
| 4872 | CHIP2732 | STM/STY    | 1 | 0 | STM1506 | rspB  | putative dehydrogenas       |
| 4873 | CHIP3262 | STM/STY    | 1 | 1 | STM3369 | yhdP  | paral putati STY3549        |
| 4874 | CHIP3278 | STM/STY    | 1 | 1 | STM0631 | ybeM  | putative hy STY0680         |
| 4875 | CHIP3294 | STM specif | 1 | 0 | STM0655 | ybeR  | putative cytoplasmic pr     |
| 4876 | CHIP3310 | STM/STY    | 1 | 1 | STM0687 | ybfM  | putative ou STY0725         |
| 4877 | CHIP3326 | STM/STY    | 1 | 1 | STM0714 | ybgL  | putative lac STY0754        |

|      |          |            |   |   |         |      |                         |         |
|------|----------|------------|---|---|---------|------|-------------------------|---------|
| 4878 | CHIP0792 | STM/STY    | 1 | 1 | STM2398 | pgtC | Phosphogl               | STY2635 |
| 4879 | CHIP4001 | STM/STY    | 1 | 1 | STM2101 | wcaK | putative ga             | STY2311 |
| 4880 | CHIP3729 | STM specil | 1 | 0 | STM4575 |      | putative outer membra   |         |
| 4881 | CHIP3753 | STM/STY    | 1 | 1 | STM0282 |      | putative ou             | STY0305 |
| 4882 | CHIP4065 | STM specil | 1 | 0 | STM2758 |      | putative phosphotransf  |         |
| 4883 | CHIP4081 | STM/STY    | 1 | 1 | STM2780 |      | homologue               | STY2897 |
| 4884 | CHIP1121 | STM specil | 1 | 0 | STM1044 | sodC | Gifsy-2 prophage: sup   |         |
| 4885 | CHIP3747 | STM/STY    | 1 | 1 | STM0272 |      | putative AT             | STY0294 |
| 4886 | CHIP4059 | STM specil | 1 | 0 | STM2752 |      | putative PTS enzyme I   |         |
| 4887 | CHIP3787 | STM/STY    | 1 | 1 | STM0335 |      | putative ou             | STY0368 |
| 4888 | CHIP3811 | STM/STY    | 1 | 1 | STM1088 | pipB | Pathogenic              | STY1117 |
| 4889 | CHIP2387 | STM/STY    | 1 | 1 | STM3412 | zntR | Zn(II)-resp             | STY4386 |
| 4890 | CHIP2403 | STM/STY    | 1 | 1 | STM3465 | yhfA | putative inr            | STY4332 |
| 4891 | CHIP3805 | STM/STY    | 1 | 1 | STM1080 | yccW | putative S <sup>A</sup> | STY1103 |
| 4892 | CHIP2381 | STM/STY    | 1 | 1 | STM1502 | speG | spermidine              | STY1561 |
| 4893 | CHIP2397 | STM/STY    | 1 | 1 | STM3455 | slyD | FKBP-type               | STY4343 |
| 4894 | CHIP2413 | STM/STY    | 1 | 1 | STM3492 | yrfD | putative pe             | STY4304 |
| 4895 | CHIP3877 | STM/STY    | 1 | 1 | STM1238 | icdA | isocitrate d            | STY1278 |
| 4896 | CHIP3893 | STM/STY    | 1 | 1 | STM1279 | yeaM | putative re             | STY1839 |
| 4897 | CHIP2399 | STM/STY    | 1 | 1 | STM3457 | kefB | CPA2 fami               | STY4341 |
| 4898 | CHIP3863 | STM/STY    | 1 | 1 | STM1209 | ycfO | putative gly            | STY1249 |
| 4899 | CHIP3879 | STM/STY    | 1 | 1 | STM1251 |      | putative m              | STY1871 |
| 4900 | CHIP2455 | STM specil | 1 | 0 | STM3559 | yhhV | putative cytoplasmic pr |         |
| 4901 | CHIP4104 | STM/STY    | 1 | 1 | STM4045 | rhaD | rhamnulos               | STY3828 |
| 4902 | CHIP3552 | STM specil | 1 | 0 | STM4210 |      | putative methyl-accept  |         |
| 4903 | CHIP4114 | STM/STY    | 1 | 1 | STM4076 | ydeZ | putative AE             | STY3794 |
| 4904 | CHIP4130 | STM specil | 1 | 0 | STM4107 | yijF | putative periplasmic pr |         |
| 4905 | CHIP4154 | STM/STY    | 1 | 1 | STM2860 | ygbA | putative cy             | STY2982 |
| 4906 | CHIP4170 | STM/STY    | 1 | 0 | STM2918 | ygbJ | 3-hydroxyis             | STY3043 |
| 4907 | CHIP3042 | STM/STY    | 1 | 1 | STM2377 |      | putative inr            | STY2608 |
| 4908 | CHIP3058 | STM/STY    | 1 | 1 | STM2410 | yfeA | putative Di             | STY2651 |
| 4909 | CHIP3444 | STM specil | 1 | 0 | STM0900 |      | Fels-1 prophage; putat  |         |
| 4910 | CHIP3084 | STM/STY    | 1 | 1 | STM2485 | ypfl | putative ac             | STY2723 |
| 4911 | CHIP3484 | STM/STY    | 1 | 1 | STM0957 | cydD | ABC super               | STY0955 |
| 4912 | CHIP3132 | STM specil | 0 | 0 | STM2588 |      | Gifsy-1 prophage: simi  |         |
| 4913 | CHIP4117 | STM/STY    | 1 | 1 | STM4082 | yiiQ | putative pe             | STY3788 |
| 4914 | CHIP3565 | STM/STY    | 1 | 1 | STM4225 | yjbH | putative ou             | STY4421 |
| 4915 | CHIP4167 | STM/STY    | 1 | 1 | STM2913 |      | putative pe             | STY3038 |
| 4916 | CHIP4183 | STM specil | 1 | 0 | STM2938 |      | putative cytoplasmic pr |         |
| 4917 | CHIP3431 | STM/STY    | 0 | 0 |         |      | STY0914                 |         |
| 4918 | CHIP3447 | STM specil | 1 | 0 | STM0903 |      | Fels-1 prophage; putat  |         |
| 4919 | CHIP3463 | STM specil | 1 | 0 | STM0920 |      | Fels-1 prophage; ail ar |         |
| 4920 | CHIP3103 | STM/STY    | 1 | 1 | STM2525 | yfgB | putative Fe             | STY2770 |
| 4921 | CHIP2357 | STM/STY    | 1 | 1 | STM1364 | ydiK | putative pe             | STY1759 |
| 4922 | CHIP2946 | STM/STY    | 1 | 1 | STM1937 | tyrP | HAAAP far               | STY2145 |
| 4923 | CHIP2962 | STM/STY    | 1 | 1 | STM1994 |      | putative inr            | STY2202 |
| 4924 | CHIP3658 | STM specil | 1 | 0 | STM4432 |      | putative thiamine pyro  |         |
| 4925 | CHIP3682 | STM specil | 1 | 0 | STM4491 |      | putative ATP-depende    |         |
| 4926 | CHIP3698 | STM/STY    | 1 | 1 | STM4516 | yjiN | putative inr            | STY4873 |
| 4927 | CHIP3692 | STM/STY    | 1 | 1 | STM4501 |      | putative cy             | STY4857 |
| 4928 | CHIP3036 | STM/STY    | 1 | 1 | STM2366 | accD | acetylCoA               | STY2597 |
| 4929 | CHIP2288 | STM/STY    | 1 | 1 | STM1228 |      | putative pe             | STY1268 |

|      |          |            |   |   |         |      |                          |         |
|------|----------|------------|---|---|---------|------|--------------------------|---------|
| 4930 | CHIP2304 | STM/STY    | 1 | 1 | STM1336 | rplT | 50S riboso               | STY1775 |
| 4931 | CHIP0245 | STM/STY    | 1 | 1 | STM2433 | crr  | PTS family               | STY2670 |
| 4932 | CHIP2344 | STM/STY    | 1 | 1 | STM1278 | yeaN | putative Mf              | STY1840 |
| 4933 | CHIP2322 | STM/STY    | 1 | 1 | STM1077 | yccT | putative pe              | STY1099 |
| 4934 | CHIP0263 | STM/STY    | 1 | 1 | STM2866 | sprB | transcriptio             | STY2987 |
| 4935 | CHIP0279 | STM/STY    | 1 | 1 | STM2269 | yojN | putative se              | STY2494 |
| 4936 | CHIP2951 | STM/STY    | 1 | 1 | STM1946 | uvrC | UvrC with l              | STY2154 |
| 4937 | CHIP2967 | STM specil | 1 | 0 | STM2008 |      | putative periplasmic pr  |         |
| 4938 | CHIP2983 | STM/STY    | 1 | 1 | STM2264 | alkB | DNA repair               | STY2490 |
| 4939 | CHIP3913 | STM/STY    | 1 | 1 | STM1316 | celF | phospho-bi               | STY1797 |
| 4940 | CHIP3937 | STM specil | 1 | 0 | STM1359 | ydiB | putative shikimate 5-de  |         |
| 4941 | CHIP3961 | STM/STY    | 1 | 0 | STM1450 | pdxY | pyridoxal kinase 2/pyric |         |
| 4942 | CHIP3977 | STM/STY    | 1 | 1 | STM1481 |      | putative mε              | STY1587 |
| 4943 | CHIP0570 | STM/STY    | 1 | 1 | STM4232 | malM | periplasmic              | STY4428 |
| 4944 | CHIP1421 | STM/STY    | 1 | 1 | STM3825 | torT | periplasmic              | STY3952 |
| 4945 | CHIP1327 | STM/STY    | 1 | 1 | STM3804 | yidG | putative inr             | STY3975 |
| 4946 | CHIP1351 | STM/STY    | 1 | 1 | STM0216 | rpsB | 30S riboso               | STY0239 |
| 4947 | CHIP1463 | STM/STY    | 1 | 1 | STM0372 | hemB | 5-aminolev               | STY0404 |
| 4948 | CHIP1391 | STM/STY    | 1 | 1 | STM0132 | ftsA | ATP-bindin               | STY0152 |
| 4949 | CHIP1503 | STM/STY    | 1 | 1 | STM2327 | nuoB | NADH deh                 | STY2557 |
| 4950 | CHIP0501 | STM/STY    | 1 | 1 | STM1721 | trpH | trpR contro              | STY1329 |
| 4951 | CHIP0503 | STM/STY    | 1 | 1 | STM3837 | dnaN | DNA polyr                | STY3941 |
| 4952 | CHIP3950 | STM/STY    | 1 | 1 | STM1392 | ssrA | Secretion ε              | STY1728 |
| 4953 | CHIP3974 | STM/STY    | 1 | 0 | STM1473 | ompN | outer membrane protei    |         |
| 4954 | CHIP0567 | STM/STY    | 1 | 1 | STM0545 | fimC | periplasmic              | STY0592 |
| 4955 | CHIP1426 | STM/STY    | 1 | 1 | STM3849 | yieE | putative cyf             | STY3934 |
| 4956 | CHIP1442 | STM/STY    | 1 | 1 | STM0356 |      | putative inr             | STY0387 |
| 4957 | CHIP3168 | STM/STY    | 1 | 1 | STM2644 | yfiE | putative tra             | STY2837 |
| 4958 | CHIP3192 | STM/STY    | 1 | 1 | STM3215 | yqjl | putative tra             | STY3393 |
| 4959 | CHIP2068 | STM/STY    | 1 | 1 | STM3524 | glpG | protein of c             | STY4279 |
| 4960 | CHIP0962 | STM/STY    | 1 | 0 | STM4155 |      | putative inner membra    |         |
| 4961 | CHIP0978 | STM specil | 1 | 0 | STM1055 |      | Gifsy-2 prophage         |         |
| 4962 | CHIP0994 | STM specil | 0 | 0 | STM2631 |      | Gifsy-1 prophage         |         |
| 4963 | CHIP1575 | STM/STY    | 1 | 1 | STM0593 | ybdA | putative PC              | STY0637 |
| 4964 | CHIP1991 | STM/STY    | 1 | 1 | STM4381 | yjfQ | putative tra             | STY4737 |
| 4965 | CHIP2007 | STM/STY    | 1 | 1 | STM4477 | pepA | aminopepti               | STY4816 |
| 4966 | CHIP3171 | STM/STY    | 1 | 1 | STM2650 | yfiP | putative cyf             | STY2843 |
| 4967 | CHIP3187 | STM/STY    | 1 | 1 | STM3202 | ygiF | putative cyf             | STY3381 |
| 4968 | CHIP3203 | STM/STY    | 1 | 1 | STM3243 | tdcC | HAAAP far                | STY3426 |
| 4969 | CHIP3205 | STM/STY    | 1 | 1 | STM3249 | garL | 2-Dehydro-               | STY3431 |
| 4970 | CHIP1514 | STM/STY    | 1 | 1 | STM2289 |      | putative 2,-             | STY2519 |
| 4971 | CHIP1538 | STM/STY    | 1 | 1 | STM2496 | yfgE | putative AT              | STY2737 |
| 4972 | CHIP1562 | STM/STY    | 1 | 1 | STM0486 | recR | putative rec             | STY0530 |
| 4973 | CHIP1578 | STM/STY    | 1 | 1 | STM0472 | maa  | maltose o-;              | STY0515 |
| 4974 | CHIP1594 | STM specil | 1 | 0 | STM0573 |      | putative inner membra    |         |
| 4975 | CHIP1796 | STM/STY    | 1 | 1 | STM4007 | glnA | glutamine ε              | STY3874 |
| 4976 | CHIP1828 | STM/STY    | 1 | 1 | STM0844 | pflE | putative py              | STY0883 |
| 4977 | CHIP1868 | STM/STY    | 1 | 1 | STM0738 | sucC | succinyl-Cε              | STY0781 |
| 4978 | CHIP0674 | STM/STY    | 1 | 1 | STM4006 | glnL | sensory kir              | STY3875 |
| 4979 | CHIP0690 | STM/STY    | 1 | 1 | STM2354 | hisJ | ABC super                | STY2584 |
| 4980 | CHIP0706 | STM/STY    | 1 | 1 | STM0118 | fruR | transcriptio             | STY0138 |
| 4981 | CHIP1839 | STM/STY    | 1 | 1 | STM0694 | fldA | flavodoxin               | STY0732 |



|      |          |            |   |   |         |      |                         |          |
|------|----------|------------|---|---|---------|------|-------------------------|----------|
| 4982 | CHIP1871 | STM/STY    | 1 | 1 | STM0735 | sdhB | succinate c             | STY0778  |
| 4983 | CHIP0677 | STM/STY    | 1 | 1 | STM0228 | lpxA | UDP-N-acε               | STY0251  |
| 4984 | CHIP0701 | STM/STY    | 1 | 1 | STM2674 | trmD | tRNA (guar              | STY2861  |
| 4985 | CHIP0717 | STM/STY    | 1 | 1 | STM4361 | hfq  | host factor             | STY4718  |
| 4986 | CHIP0733 | STM/STY    | 1 | 1 | STM1777 | hemA | glutamyl tR             | STY1902  |
| 4987 | CHIP0600 | STM/STY    | 1 | 1 | STM2500 | purN | polyphosph              | STY2741  |
| 4988 | CHIP0720 | STM/STY    | 1 | 1 | STM0846 | moeA | molybdoptε              | STY0885  |
| 4989 | CHIP0744 | STM specil | 1 | 0 | STM1240 | envF | putative envelope lipop |          |
| 4990 | CHIP1811 | STM/STY    | 1 | 1 | STM4062 | pfkA | 6-phosphol              | STY3809  |
| 4991 | CHIP1843 | STM/STY    | 1 | 1 | STM0664 | gltJ | ABC super               | STY0709  |
| 4992 | CHIP1883 | STM/STY    | 1 | 1 | STM3399 | yrdA | putative fer            | STY4398  |
| 4993 | CHIP4714 | STM/STY    | 1 | 1 | STM1600 |      | putative inr            | STY1464  |
| 4994 | CHIP4730 | STM/STY    | 0 | 1 | STM2634 |      | putative cyf            | STY1013  |
| 4995 | CHIP0187 | STM/STY    | 1 | 1 | STM2048 | pduM | Propanedic              | STY2253  |
| 4996 | CHIP1230 | STM/STY    | 1 | 1 | STM4286 | lpxO | putative dic            | STY4485  |
| 4997 | CHIP1246 | STM/STY    | 1 | 1 | STM1949 | yecF | putative cyf            | STY2157  |
| 4998 | CHIP0443 | STM/STY    | 0 | 0 |         |      |                         |          |
| 4999 | CHIP1272 | STM/STY    | 1 | 1 | STM3357 |      | putative reε            | STY3537  |
| 5000 | CHIP1296 | STM/STY    | 1 | 1 | STM0010 | htgA | positive reε            | STY0010  |
| 5001 | CHIP1312 | STM/STY    | 1 | 1 | STM0003 | thrB | homoserinε              | STY0003  |
| 5002 | CHIP4693 | STM/STY    | 1 | 1 | STM1331 |      | putative inr            | STY1779a |
| 5003 | CHIP4709 | STM/STY    | 1 | 1 | STM1872 |      | putative cyf            | STY2078  |
| 5004 | CHIP3211 | STM/STY    | 1 | 0 | STM3264 | yraM | paral putati            | STY3447  |
| 5005 | CHIP4727 | STM/STY    | 1 | 1 | STM2475 |      | putative cyf            | STY2712  |
| 5006 | CHIP3456 | STM specil | 1 | 0 | STM0913 |      | Fels-1 prophage         |          |
| 5007 | CHIP0392 | STM/STY    | 1 | 1 | STM2188 | mgIC | ABC super               | STY2421  |
| 5008 | CHIP0408 | STM/STY    | 1 | 1 | STM0570 | apeE | outer mem               | STY0619  |
| 5009 | CHIP0432 | STM/STY    | 1 | 1 | STM0191 | fhuA | outer mem               | STY0218  |
| 5010 | CHIP0448 | STM/STY    | 0 | 0 |         |      |                         |          |
| 5011 | CHIP0914 | STM/STY    | 1 | 1 | STM2325 | nuoE | NADH deh                | STY2555  |
| 5012 | CHIP1765 | STM/STY    | 1 | 1 | STM3007 | ygdR | putative PC             | STY3150  |
| 5013 | CHIP0003 | STM/STY    | 1 | 1 | STM3985 | yigZ | putative cyf            | STY3575  |
| 5014 | CHIP0027 | STM/STY    | 1 | 1 | STM3960 | rthB | homoserinε              | STY3599  |
| 5015 | CHIP0051 | STM/STY    | 1 | 1 | STM3935 | hemY | a late step             | STY3624  |
| 5016 | CHIP0091 | STM/STY    | 1 | 1 | STM4150 | rplA | 50S riboso              | STY3735  |
| 5017 | CHIP0061 | STM/STY    | 1 | 1 | STM3921 | wecC | UDP-N-acε               | STY3634  |
| 5018 | CHIP0085 | STM/STY    | 1 | 1 | STM4137 | murB | UDP-N-acε               | STY3742  |
| 5019 | CHIP0869 | STM/STY    | 1 | 1 | STM1972 | fiil | flagellum-s             | STY2180  |
| 5020 | CHIP0885 | STM/STY    | 1 | 1 | STM2431 | ptsH | PTS family              | STY2667  |
| 5021 | CHIP0901 | STM/STY    | 1 | 1 | STM0104 | araC | transcriptio            | STY0121  |
| 5022 | CHIP1752 | STM/STY    | 1 | 1 | STM2952 | eno  | enolase                 | STY3081  |
| 5023 | CHIP1778 | STM/STY    | 1 | 1 | STM4084 | fpr  | ferredoxin-             | STY3786  |
| 5024 | CHIP0696 | STM/STY    | 1 | 1 | STM2076 | hisA | N-(5'-phosε             | STY2285  |
| 5025 | CHIP0056 | STM/STY    | 1 | 1 | STM3926 | wzxE | O-antigen t             | STY3629  |
| 5026 | CHIP0096 | STM/STY    | 1 | 1 | STM4166 | yjaD | putative N1             | STY3719  |
| 5027 | CHIP0880 | STM/STY    | 1 | 1 | STM0380 | ddlA | D-alanine-I             | STY0412  |
| 5028 | CHIP0896 | STM/STY    | 1 | 1 | STM1921 | cheA | sensory his             | STY2130  |
| 5029 | CHIP2881 | STM/STY    | 1 | 1 | STM1796 | treA | trehalase, ε            | STY1924  |
| 5030 | CHIP2801 | STM/STY    | 1 | 0 | STM1624 |      | putative cyf            | STY1440  |
| 5031 | CHIP2825 | STM/STY    | 1 | 1 | STM1658 | ydaL | putative Sn             | STY1406  |
| 5032 | CHIP1126 | STM/STY    | 1 | 1 | STM0887 | artJ | ABC super               | STY0920  |
| 5033 | CHIP1150 | STM/STY    | 1 | 1 | STM0619 | citG | putative mc             | STY0668  |

|      |          |            |   |   |         |      |                        |         |
|------|----------|------------|---|---|---------|------|------------------------|---------|
| 5034 | CHIP1166 | STM/STY    | 1 | 1 | STM0990 | ybcC | putative Kir           | STY0992 |
| 5035 | CHIP1176 | STM/STY    | 1 | 1 | STM3766 |      | putative cyf           | STY4020 |
| 5036 | CHIP4460 | STM/STY    | 1 | 1 | STM0602 | ybdH | putative gly           | STY0646 |
| 5037 | CHIP2852 | STM/STY    | 1 | 1 | STM1719 | yciL | putative rib           | STY1331 |
| 5038 | CHIP2772 | STM/STY    | 1 | 0 | STM1570 | fdnG | putative mc            | STY1492 |
| 5039 | CHIP2892 | STM/STY    | 1 | 1 | STM1821 | yoaA | putative Df            | STY1951 |
| 5040 | CHIP2908 | STM/STY    | 1 | 1 | STM1849 |      | putative inr           | STY1980 |
| 5041 | CHIP2918 | STM specil | 1 | 0 | STM1870 |      | Homology to recE (exc  |         |
| 5042 | CHIP2934 | STM/STY    | 1 | 1 | STM1897 | yebB | putative pe            | STY2105 |
| 5043 | CHIP4391 | STM/STY    | 1 | 1 | STM0482 | ybaN | putative ph            | STY0526 |
| 5044 | CHIP4415 | STM/STY    | 1 | 1 | STM0524 | ybbY | putative tra           | STY0572 |
| 5045 | CHIP4431 | STM/STY    | 1 | 1 | STM0557 |      | putative inr           | STY0605 |
| 5046 | CHIP1187 | STM/STY    | 1 | 1 | STM1575 |      | putative tra           | STY1490 |
| 5047 | CHIP4265 | STM specil | 1 | 0 | STM3118 |      | putative acetyl-CoA hy |         |
| 5048 | CHIP4577 | STM/STY    | 0 | 0 | STM2288 |      | putative cyf           | STY2518 |
| 5049 | CHIP4593 | STM/STY    | 1 | 1 | STM2774 | iroC | putative AT            | STY2891 |
| 5050 | CHIP2497 | STM/STY    | 1 | 1 | STM3655 | glyS | glycine tRN            | STY4144 |
| 5051 | CHIP4633 | STM/STY    | 1 | 0 | STM0747 | tolA | tol protein, membrane  |         |
| 5052 | CHIP4657 | STM specil | 0 | 0 | STM4111 |      | pseudogene; frameshil  |         |
| 5053 | CHIP4292 | STM/STY    | 1 | 1 | STM3175 |      | putative ba            | STY3352 |
| 5054 | CHIP4220 | STM/STY    | 1 | 1 | STM3013 | lysA | diaminopir             | STY3157 |
| 5055 | CHIP4244 | STM/STY    | 1 | 1 | STM3078 | speB | agmatinas              | STY3238 |
| 5056 | CHIP4364 | STM specil | 1 | 0 | STM0438 |      | putative TPR repeat pr |         |
| 5057 | CHIP4588 | STM/STY    | 1 | 1 | STM2843 | hydN | electron tra           | STY2965 |
| 5058 | CHIP2492 | STM/STY    | 1 | 1 | STM3643 | yiaC | putative ac            | STY4159 |
| 5059 | CHIP2542 | STM/STY    | 1 | 1 | STM3770 |      | putative ph            | STY4015 |
| 5060 | CHIP4215 | STM/STY    | 1 | 1 | STM2998 | ygdB | putative pe            | STY3136 |
| 5061 | CHIP4231 | STM/STY    | 1 | 1 | STM3030 |      | putative pe            | STY3178 |
| 5062 | CHIP4263 | STM/STY    | 1 | 1 | STM3115 | yqgA | putative inr           | STY3272 |
| 5063 | CHIP4279 | STM/STY    | 1 | 1 | STM3145 | hybE | putative hy            | STY3316 |
| 5064 | CHIP4591 | STM/STY    | 1 | 1 | STM2721 |      | Fels-2 pro             | STY4626 |
| 5065 | CHIP1677 | STM/STY    | 1 | 1 | STM2163 | yehX | putative AE            | STY2393 |
| 5066 | CHIP1693 | STM/STY    | 1 | 1 | STM1819 | slp  | putative ou            | STY1949 |
| 5067 | CHIP1909 | STM/STY    | 1 | 1 | STM3428 | rplE | 50S riboso             | STY4370 |
| 5068 | CHIP2117 | STM/STY    | 1 | 1 | STM3550 |      | putative ph            | STY4261 |
| 5069 | CHIP2141 | STM/STY    | 1 | 1 | STM3296 | hflB | ATP-deper              | STY3474 |
| 5070 | CHIP2157 | STM/STY    | 1 | 1 | STM3208 | gcp  | putative O-            | STY3387 |
| 5071 | CHIP2119 | STM/STY    | 1 | 1 | STM3548 |      | putative cyf           | STY4263 |
| 5072 | CHIP2135 | STM/STY    | 1 | 1 | STM3310 | yrbC | putative AE            | STY3489 |
| 5073 | CHIP1967 | STM/STY    | 1 | 1 | STM4507 | uxuR | transcriptio           | STY4862 |
| 5074 | CHIP1983 | STM/STY    | 1 | 1 | STM4323 | dsbD | thiol:disulfk          | STY4682 |
| 5075 | CHIP4492 | STM/STY    | 1 | 1 | STM0374 | yaiV | putative inr           | STY0406 |
| 5076 | CHIP1632 | STM/STY    | 1 | 1 | STM2143 | yegU | putative gly           | STY2372 |
| 5077 | CHIP1610 | STM/STY    | 1 | 1 | STM2836 | gutM | putative glt           | STY2957 |
| 5078 | CHIP1634 | STM/STY    | 1 | 1 | STM2155 | metG | methionine             | STY2384 |
| 5079 | CHIP4534 | STM/STY    | 1 | 1 | STM2221 | bcr  | MFS family             | STY2458 |
| 5080 | CHIP4550 | STM/STY    | 0 | 0 |         |      |                        | STY2469 |
| 5081 | CHIP4566 | STM/STY    | 1 | 1 | STM2168 | pbpG | D-alanyl-D-            | STY2398 |
| 5082 | CHIP1898 | STM/STY    | 1 | 1 | STM0259 | yafE | putative mc            | STY0280 |
| 5083 | CHIP0369 | STM/STY    | 1 | 1 | STM1407 | ssaH | Secretion s            | STY1713 |
| 5084 | CHIP3336 | STM/STY    | 1 | 1 | STM0733 | sdhD | succinate c            | STY0776 |
| 5085 | CHIP3384 | STM/STY    | 1 | 0 | STM0810 |      | putative inr           | STY0845 |

|      |          |            |   |   |         |      |                          |         |
|------|----------|------------|---|---|---------|------|--------------------------|---------|
| 5086 | CHIP0290 | STM/STY    | 1 | 1 | STM2678 | corE | putative cy              | STY2865 |
| 5087 | CHIP2205 | STM/STY    | 0 | 0 |         |      |                          | STY3454 |
| 5088 | CHIP2221 | STM/STY    | 1 | 1 | STM3227 | yqjB | putative ou              | STY3407 |
| 5089 | CHIP3411 | STM/STY    | 1 | 1 | STM0851 | yliD | putative AE              | STY0890 |
| 5090 | CHIP0309 | STM/STY    | 1 | 1 | STM1385 | ttrB | Tetrathion               | STY1736 |
| 5091 | CHIP2216 | STM/STY    | 1 | 1 | STM3233 | yqjG | putative glt             | STY3413 |
| 5092 | CHIP2240 | STM/STY    | 1 | 1 | STM3155 |      | putative cy              | STY3328 |
| 5093 | CHIP2264 | STM/STY    | 1 | 0 | STM3045 | fldB | flavodoxin               | STY3201 |
| 5094 | CHIP3348 | STM/STY    | 1 | 1 | STM0760 | aroG | 3-deoxy-D-               | STY0801 |
| 5095 | CHIP0320 | STM/STY    | 1 | 1 | STM1183 | flgK | flagellar bic            | STY1222 |
| 5096 | CHIP0336 | STM/STY    | 1 | 1 | STM1915 | cheZ | chemotacti               | STY2124 |
| 5097 | CHIP2243 | STM/STY    | 1 | 1 | STM3129 |      | putative N/              | STY3298 |
| 5098 | CHIP0376 | STM/STY    | 1 | 1 | STM1113 | scsA | Suppressic               | STY1149 |
| 5099 | CHIP3343 | STM/STY    | 1 | 1 | STM0749 | pal  | tol protein              | STY0795 |
| 5100 | CHIP3375 | STM/STY    | 1 | 1 | STM0796 | bioC | biotin biosy             | STY0829 |
| 5101 | CHIP1576 | STM/STY    | 1 | 1 | STM0599 | ybdB | putative pr              | STY0643 |
| 5102 | CHIP1530 | STM/STY    | 1 | 1 | STM2537 | yfhJ | believed to              | STY2783 |
| 5103 | CHIP1555 | STM/STY    | 1 | 1 | STM2481 | acrD | RND family               | STY2719 |
| 5104 | CHIP1620 | STM/STY    | 1 | 1 | STM2826 | csrA | carbon sto               | STY2947 |
| 5105 | CHIP3528 | STM specil | 1 | 0 | STM1037 |      | Gifsy-2 prophage; prot   |         |
| 5106 | CHIP3560 | STM specil | 1 | 0 | STM4219 |      | putative cytoplasmic pr  |         |
| 5107 | CHIP2081 | STM/STY    | 1 | 1 | STM3741 | rpoZ | RNA polymr               | STY4051 |
| 5108 | CHIP2092 | STM/STY    | 1 | 1 | STM3686 | mtlD | mannitol-1-              | STY4110 |
| 5109 | CHIP3574 | STM/STY    | 1 | 1 | STM4252 |      | putative inr             | STY4448 |
| 5110 | CHIP3551 | STM specil | 1 | 0 | STM4209 |      | putative inner membra    |         |
| 5111 | CHIP4025 | STM/STY    | 1 | 1 | STM2139 |      | putative inr             | STY2367 |
| 5112 | CHIP4042 | STM specil | 1 | 0 | STM2733 |      | Fels-2 prophage: simil   |         |
| 5113 | CHIP2483 | STM/STY    | 1 | 1 | STM3621 | yhjR | putative cy              | STY4179 |
| 5114 | CHIP3748 | STM/STY    | 1 | 1 | STM0273 |      | putative cy              | STY0297 |
| 5115 | CHIP3928 | STM specil | 1 | 0 | STM1350 | ydiD | homologue of a plant p   |         |
| 5116 | CHIP1592 | STM/STY    | 1 | 1 | STM0563 |      | putative tra             | STY0611 |
| 5117 | CHIP3940 | STM specil | 1 | 0 | STM1362 | ydiL | putative cytoplasmic pr  |         |
| 5118 | CHIP1170 | STM/STY    | 1 | 1 | STM1563 | osmC | putative re              | STY1497 |
| 5119 | CHIP2629 | STM/STY    | 1 | 1 | STM0044 | yaaY | putative cy              | STY0053 |
| 5120 | CHIP2574 | STM specil | 1 | 0 | STM3829 | dgoK | 2-oxo-3-deoxygalacton    |         |
| 5121 | CHIP2567 | STM/STY    | 1 | 1 | STM3820 |      | putative cy              | STY3958 |
| 5122 | CHIP2656 | STM/STY    | 1 | 0 | STM0099 |      | putative inner membra    |         |
| 5123 | CHIP4506 | STM specil | 1 | 0 | STM1794 |      | putative periplasmic pr  |         |
| 5124 | CHIP3112 | STM/STY    | 1 | 1 | STM2542 | nifU | NifU homol               | STY2788 |
| 5125 | CHIP3213 | STM/STY    | 1 | 1 | STM3266 | yraO | putative ph              | STY3449 |
| 5126 | CHIP3151 | STM specil | 1 | 0 | STM2607 |      | Gifsy-1 prophage: simi   |         |
| 5127 | CHIP3428 | STM/STY    | 1 | 1 | STM0875 | rimK | ribosomal                | STY0908 |
| 5128 | CHIP3477 | STM/STY    | 1 | 1 | STM0943 | cspD | similar to C             | STY0940 |
| 5129 | CHIP3511 | STM/STY    | 1 | 1 | STM1006 |      | Gifsy-2 pro              | STY1012 |
| 5130 | CHIP3379 | STM/STY    | 1 | 1 | STM0805 | moaD | molybdopt                | STY0839 |
| 5131 | CHIP1094 | STM specil | 1 | 0 | PSLT085 | traR | conjugative transfer     |         |
| 5132 | CHIP1055 | STM specil | 0 | 0 | PSLT021 |      | pseudogene; two fram     |         |
| 5133 | CHIP1103 | STM specil | 1 | 0 | PSLT094 | trbC | conjugative transfer: as |         |
| 5134 | CHIP0170 | STM specil | 1 | 0 | PSLT078 | traL | conjugative transfer: as |         |
| 5135 | CHIP0420 | STM specil | 1 | 0 | PSLT016 | pefD | plasmid-encoded fimbr    |         |
| 5136 | CHIP0423 | STM specil | 1 | 0 | PSLT015 | orf5 | putative outer membra    |         |
| 5137 | CHIP4756 | STM specil | 1 | 0 | PSLT066 | ssbB | single-strand binding p  |         |

|      |          |            |   |   |         |      |                        |         |
|------|----------|------------|---|---|---------|------|------------------------|---------|
| 5138 | CHIP4760 | STM/STY    | 0 | 0 |         |      |                        |         |
| 5139 | CHIP4764 | STM/STY    | 0 | 0 |         |      |                        |         |
| 5140 | CHIP4768 | STM/STY    | 0 | 0 |         |      |                        |         |
| 5141 | CHIP4772 | STM/STY    | 0 | 0 | STM0252 | rrlH | 23S rRNA               |         |
| 5142 | CHIP4776 | STM specif | 1 | 0 | STM0292 |      | putative RHS-family pr |         |
| 5143 | CHIP4852 | STM/STY    | 0 | 0 |         |      |                        |         |
| 5144 | CHIP4856 | STM specif | 0 | 0 |         |      |                        |         |
| 5145 | CHIP4860 | STM specif | 0 | 0 |         |      |                        |         |
| 5146 | CHIP4864 | STM specif | 0 | 0 |         |      |                        |         |
| 5147 | CTRL003  | none       | 0 | 0 |         |      |                        |         |
| 5148 | CTRL002  | none       | 0 | 0 |         |      |                        |         |
| 5149 | CHIP5210 | STY specif | 0 | 1 |         |      | STY3343                |         |
| 5150 | CHIP5226 | STY specif | 0 | 1 |         |      | STY3662                |         |
| 5151 | CHIP5160 | STY specif | 0 | 1 |         |      | STY2629                |         |
| 5152 | CHIP5263 | STY specif | 0 | 1 |         |      | STY3844                |         |
| 5153 | CHIP5006 | STY specif | 0 | 1 |         |      | STY1359                |         |
| 5154 | CHIP5022 | STY specif | 0 | 1 |         |      | STY1597                |         |
| 5155 | CHIP5138 | STM/STY    | 0 | 1 |         |      | STY2167                |         |
| 5156 | CHIP5154 | STY specif | 0 | 1 |         |      | STY2358                |         |
| 5157 | CHIP5257 | STY specif | 0 | 0 |         |      |                        |         |
| 5158 | CHIP5273 | STY specif | 0 | 1 |         |      | STY4039                |         |
| 5159 | CHIP5016 | STY specif | 0 | 1 |         |      | STY1591                |         |
| 5160 | CHIP5032 | STY specif | 0 | 1 |         |      | STY1608                |         |
| 5161 | CHIP5156 | STY specif | 0 | 1 |         |      | STY2362                |         |
| 5162 | CHIP5170 | STY specif | 0 | 1 |         |      | STY2880                |         |
| 5163 | CHIP5186 | STY specif | 0 | 1 |         |      | STY3068                |         |
| 5164 | CHIP4923 | STY specif | 0 | 1 |         |      | STY0301                |         |
| 5165 | CHIP4939 | STY specif | 0 | 1 |         |      | STY0347                |         |
| 5166 | CHIP4955 | STY specif | 0 | 1 |         |      | STY1015                |         |
| 5167 | CHIP5261 | STY specif | 0 | 1 |         |      | STY3763                |         |
| 5168 | CHIP5276 | STM/STY    | 1 | 1 | STM3689 | yibL | putative cyf           | STY4107 |
| 5169 | CHIP5289 | STM/STY    | 0 | 0 |         |      |                        |         |
| 5170 | CHIP5305 | STY specif | 0 | 1 |         |      | STY4530                |         |
| 5171 | CHIP5326 | STY specif | 0 | 1 |         |      | STY4564                |         |
| 5172 | CHIP5342 | STY specif | 0 | 1 |         |      | STY4582                |         |
| 5173 | CHIP5405 | STY specif | 0 | 1 |         |      | STY4706                |         |
| 5174 | CHIP5346 | STY specif | 0 | 1 |         |      | STY4586                |         |
| 5175 | CHIP5281 | STM/STY    | 0 | 1 |         |      | STY4162                |         |
| 5176 | CHIP5294 | STY specif | 0 | 1 |         |      | STY4415                |         |
| 5177 | CHIP5310 | STY specif | 0 | 1 |         |      | STY4540                |         |
| 5178 | CHIP5406 | STY specif | 0 | 1 |         |      | STY4755                |         |
| 5179 | buffer   | none       | 0 | 0 |         |      |                        |         |
| 5180 | empty    | none       | 0 | 0 |         |      |                        |         |
| 5181 | empty    | none       | 0 | 0 |         |      |                        |         |
| 5182 | empty    | none       | 0 | 0 |         |      |                        |         |
| 5183 | empty    | none       | 0 | 0 |         |      |                        |         |
| 5184 | empty    | none       | 0 | 0 |         |      |                        |         |

r a 100bp window & > 90% sequence identity over the entire amplified fragment - with no other gene me  
ent.

| GENE | Description      | MEDIANS | STD_DEV | THRESHO | MEDIAN_L | STD_DEV | THRESHO | MEDIAN_C |
|------|------------------|---------|---------|---------|----------|---------|---------|----------|
|      |                  | n/a     | n/a     | n/a     | n/a      | n/a     | n/a     | n/a      |
| fliE | flagellar ho     | 0.98    | 0.11    | 1       | 0.87     | 0.14    | 1       | 0.77     |
| sufI | SufI proteir     | 0.91    | 0.05    | 1       | 1.11     | 0.21    | 1       | 1.19     |
| cbiQ | putative co      | 1.12    | 0.07    | 1       | 0.86     | 0.13    | 1       | 0.75     |
| kefC | glutathione      | 0.93    | 0.03    | 1       | 1.07     | 0.1     | 1       | 0.84     |
| guaC | GMP reduc        | 0.97    | 0.09    | 1       | 1.04     | 0.1     | 1       | 0.93     |
| murG | UDP-N-acē        | 0.91    | 0.06    | 1       | 1.13     | 0.42    | 1       | 0.89     |
| kdgT | 2-keto-3-de      | 0.95    | 0.05    | 1       | 1.07     | 0.14    | 1       | 0.87     |
| folK | 2-amino-4-       | 0.82    | 0.14    | 1       | 1.06     | 0.1     | 1       | 0.88     |
| map  | methionine       | 0.93    | 0.13    | 1       | 1.05     | 0.21    | 1       | 1.03     |
| abc  | putative AE      | 0.77    | 0.06    | 1       | 1.07     | 0.2     | 1       | 1.01     |
|      | putative AT      | 0.7     | 0.16    | 1       | 1        | 10.68   | 0       | 0.79     |
| nagE | pts system       | 1       | 0.08    | 1       | 0.99     | 0.12    | 1       | 0.78     |
|      | conserved        | 1.05    | 0.12    | 1       | 1.03     | 0.18    | 1       | 0.84     |
| mgtA | Mg(2+) tra       | 0.87    | 0.06    | 1       | 1.13     | 0.14    | 1       | 1.18     |
| cbiD | CbiD protei      | 0.95    | 0.07    | 1       | 0.89     | 0.07    | 1       | 0.8      |
| umuD | UmuD prot        | 0.96    | 0.08    | 1       | 0.76     | 0.2     | 1       | 0.87     |
| pncB | nicotinate p     | 0.89    | 0.09    | 1       | 0.9      | 0.07    | 1       | 0.79     |
| yidC | putative me      | 1.02    | 0.07    | 1       | 1.1      | 0.16    | 1       | 0.98     |
| atpA | ATP synthā       | 0.91    | 0.06    | 1       | 1.06     | 0.89    | 1       | 0.89     |
|      | hypothetica      | 0.97    | 0.08    | 1       | 1.07     | 0.47    | 1       | 0.99     |
|      |                  | 0.86    | 0.06    | 1       | 1.16     | 0.14    | 1       | 1.02     |
| codA | cytosine de      | 0.12    | 0.03    | 1       | 0.98     | 0.17    | 1       | 0.74     |
| rnG  | ribonucleas      | 0.99    | 0.37    | 0       | 1.49     | 0.44    | 0       | 1.34     |
| hpaC | 4-hydroxyp       | 0.91    | 0.02    | 1       | 0.89     | 0.1     | 1       | 0.8      |
|      | conserved        | 1.08    | 0.15    | 1       | 1.05     | 0.42    | 1       | 0.78     |
|      | conserved        | 1.03    | 0.03    | 1       | 0.83     | 0.41    | 1       | 0.77     |
|      | putative co      | 0.91    | 0.13    | 1       | 1.22     | 0.18    | 1       | 1.23     |
|      | inate synthetase | 0.13    | 0.03    | 1       | 1.26     | 0.13    | 1       | n/a      |
| ftsY | cell divisior    | 1.05    | 0.11    | 1       | 1.27     | 0.21    | 1       | 1.22     |
|      | ne lipoprotein   | 0.21    | 0.11    | 1       | 0.84     | 0.98    | 1       | n/a      |
| malT | MalT reguli      | 0.89    | 0.07    | 1       | 1.23     | 0.25    | 1       | 1.18     |
| glgP | glycogen p       | 1.02    | 0.1     | 1       | 1.2      | 0.24    | 1       | 1.21     |
|      | putative me      | 1.16    | 0.18    | 1       | 1.36     | 0.2     | 1       | 1.04     |
| deoA | thymidine p      | 0.92    | 0.07    | 1       | 1.16     | 0.08    | 1       | 1.05     |
|      | probable cā      | 0.51    | 0.11    | 1       | 1.1      | 0.18    | 1       | 1.14     |
| ugpA | glycerol-3-p     | 0.92    | 0.06    | 1       | 1.16     | 0.75    | 1       | 1.13     |
|      | conserved        | 0.89    | 0.19    | 1       | 1.16     | 0.24    | 1       | 1.18     |
| creB | putative twi     | 0.91    | 0.08    | 1       | 1.21     | 0.15    | 1       | 1.2      |
| cl   | phage repr       | 0.88    | 0.07    | 1       | 1.2      | 0.49    | 1       | 1.17     |
|      | osphate synthase | 0.1     | 0.08    | 1       | 1.04     | 0.09    | 1       | n/a      |

|      |                      |      |      |   |      |      |     |      |
|------|----------------------|------|------|---|------|------|-----|------|
| iroE | putative ex          | 0.95 | 0.09 | 1 | 1.14 | 0.11 | 1   | 1.14 |
|      | hypothetica          | 0.89 | 0.12 | 1 | 1.19 | 0.13 | 1   | 1.34 |
| hypE | hydrogena            | 0.95 | 0.14 | 1 | 1.2  | 0.12 | 1   | 1.15 |
| surE | stationary- $\zeta$  | 0.98 | 0.11 | 1 | 1.18 | 0.3  | 1   | 1.04 |
| ybjF | hypothetica          | 0.84 | 0.08 | 1 | 0.98 | 0.27 | 1   | 0.81 |
|      |                      | 0.2  | 0.2  | 1 | 0.9  | 0.11 | 0   | n/a  |
| dapA | dihydrodipi          | 0.91 | 0.1  | 1 | 0.98 | 0.1  | 1   | 0.98 |
| ted  | transcriptional regu | 0.07 | 0.05 | 1 | 0.81 | 0.07 | 1   | n/a  |
|      |                      | 0.87 | 0.07 | 1 | 0.98 | 0.08 | n/a | 0.91 |
| ne   | protein              | 1.24 | 0.22 | 1 | 0.95 | 0.32 | 0   | n/a  |
| ycaI | putative co          | 1.02 | 0.11 | 1 | 0.91 | 0.1  | 1   | 0.72 |
|      |                      | 0.07 | 0.03 | 1 | 0.83 | 0.13 | 1   | n/a  |
|      | putative AE          | 1.1  | 0.18 | 1 | 1.26 | 0.16 | 1   | 1.34 |
| ppc  | phosphoen            | 0.88 | 0.04 | 1 | 1.24 | 0.16 | 1   | 1.32 |
|      | putative me          | 1.2  | 0.15 | 1 | 1.06 | 0.15 | 1   | 1.07 |
| potF | putrescine-          | 1.01 | 0.05 | 1 | 0.94 | 0.13 | 1   | 0.75 |
|      |                      | 0.06 | 0.01 | 1 | 0.88 | 0.12 | 1   | n/a  |
| gcpE | GcpE prote           | 0.92 | 0.07 | 1 | 0.97 | 0.17 | 1   | 1.03 |
|      | putative ex          | 0.86 | 0.11 | 1 | 0.96 | 0.09 | 1   | 0.95 |
| ycaJ | conserved            | 0.91 | 0.07 | 1 | 0.85 | 0.09 | 1   | 0.79 |
|      | putative tra         | 1.05 | 0.09 | 1 | 0.9  | 0.12 | 1   | 0.99 |
| dcm  | DNA-cytop            | 1.11 | 0.32 | 1 | 0.76 | 0.14 | 1   | 0.83 |
| rscB | regulator of         | 1.07 | 0.09 | 1 | 1.1  | 0.31 | 1   | 0.9  |
|      | putative me          | 0.95 | 0.07 | 1 | 1.18 | 0.76 | 1   | 0.97 |
| hpaA | 4-hydroxyp           | 1.12 | 0.11 | 1 | 0.78 | 0.13 | 1   | 0.79 |
|      | conserved            | 1.04 | 0.09 | 1 | 0.98 | 0.25 | 1   | 1    |
| fliA | RNA polym            | 1.28 | 0.1  | 1 | 0.85 | 0.14 | 1   | 0.74 |
| it   |                      | 0.19 | 0.04 | 1 | 1.01 | 0.19 | 1   | n/a  |
|      | putative me          | 1.01 | 0.1  | 1 | 0.8  | 0.25 | 1   | 0.66 |
|      | putative tra         | 0.99 | 0.11 | 1 | 0.71 | 0.08 | 1   | 0.77 |
| yjfc | conserved            | 0.85 | 0.11 | 1 | 1.29 | 0.64 | 1   | 1.17 |
| sitB | Iron transp          | 0.91 | 0.08 | 1 | 1.06 | 0.16 | 1   | 1.11 |
| gst  | glutathione          | 1.02 | 0.11 | 1 | 0.64 | 0.59 | 1   | 0.74 |
|      | conserved            | 0.94 | 0.1  | 0 | 0.99 | 0.24 | 1   | 0.86 |
| yeeF | putative an          | 0.91 | 0.12 | 1 | 0.75 | 0.09 | 1   | 0.81 |
|      |                      | 1.04 | 0.09 | 1 | 0.92 | 0.13 | n/a | 0.9  |
| nuoA | NADH dehy            | 1.01 | 0.12 | 1 | 0.96 | 0.07 | 1   | 1.02 |
|      | hypothetica          | 1.01 | 0.06 | 1 | 1.09 | 0.1  | 1   | 1.14 |
|      |                      | 0.22 | 0.13 | 1 | 1.17 | 0.24 | 1   | n/a  |
|      | hypothetica          | 0.87 | 0.09 | 1 | 1.16 | 0.13 | 1   | 1.26 |
| pdxB | erythronate          | 1.06 | 0.07 | 1 | 0.92 | 0.09 | 1   | 1    |
|      | putative inr         | 1.04 | 0.09 | 1 | 0.86 | 0.33 | 1   | 0.73 |
| pntA | pyridine nu          | 1.03 | 0.1  | 1 | 0.67 | 0.06 | 1   | 0.68 |
| pepD | aminoacyl-           | 0.91 | 0.13 | 1 | 1.18 | 2.93 | 1   | 1.02 |
|      | putative tra         | 1.04 | 0.08 | 1 | 1.14 | 0.16 | 1   | 1.05 |
| dapD | 2,3,4,5-tetr         | 1.06 | 0.06 | 1 | 1.03 | 0.21 | 1   | 0.98 |
| ddlB | D-alanine:L          | 1.01 | 0.08 | 1 | 1.08 | 0.06 | 1   | 0.83 |
| astC | succinylorn          | 0.93 | 0.09 | 1 | 0.83 | 0.75 | 1   | 0.76 |
| pheT | phenylalan           | 1.03 | 0.13 | 1 | 0.82 | 0.15 | 1   | 0.65 |
| fer  | flavoprotein         | 0.07 | 0.03 | 1 | 0.79 | 0.27 | 1   | n/a  |
| thiD | phosphome            | 1.02 | 0.05 | 1 | 0.94 | 0.11 | 1   | 0.79 |
| rstB | two compo            | 0.86 | 0.05 | 1 | 0.78 | 0.18 | 1   | 0.74 |

|                         |                |      |      |   |      |      |     |      |
|-------------------------|----------------|------|------|---|------|------|-----|------|
| ssaQ                    | putative ty    | 0.82 | 0.09 | 1 | 0.76 | 0.1  | 1   | 0.74 |
|                         | putative me    | 0.99 | 0.08 | 1 | 1.5  | 0.43 | 1   | 1.26 |
|                         | conserved      | 1    | 0.06 | 1 | 1.03 | 0.14 | 1   | 0.91 |
| frr                     | ribosome r     | 1.01 | 0.12 | 1 | 1.09 | 0.11 | 1   | 1.02 |
| rcaA                    | colanic aci    | 0.98 | 0.06 | 1 | 0.91 | 0.21 | 1   | 0.95 |
|                         | putative arr   | 0.94 | 0.04 | 1 | 1.02 | 0.11 | 1   | 0.95 |
| nuoM                    | NADH deh       | 1.06 | 0.08 | 1 | 0.96 | 0.18 | 1   | 0.91 |
| ppsA                    | phosphoen      | 0.98 | 0.06 | 1 | 0.75 | 0.08 | 1   | 0.77 |
| prgK                    | pathogenic     | 0.98 | 0.07 | 1 | 1.11 | 0.34 | 1   | 1.14 |
| cysU                    | sulphate tra   | 1    | 0.06 | 1 | 1    | 0.12 | 1   | 0.83 |
|                         | putative me    | 1.03 | 0.13 | 1 | 1.06 | 0.11 | 1   | 0.81 |
| yihI                    | conserved      | 1.19 | 0.05 | 1 | 1.35 | 0.19 | 1   | 1.31 |
| psd                     | phosphatid     | 1.01 | 0.11 | 1 | 1.1  | 2.3  | 1   | 1.17 |
| ilar to DNA packaging p |                | 0.19 | 0.06 | 1 | 1.12 | 0.21 | 1   | n/a  |
|                         | conserved      | 1.02 | 0.07 | 1 | 1.17 | 0.11 | 1   | 1.41 |
| ugpE                    | sn-Glycero     | 0.89 | 0.06 | 1 | 1.26 | 0.12 | 1   | 1.08 |
| argG                    | argininosuc    | 0.72 | 0.04 | 1 | 1.1  | 0.1  | 1   | 1.41 |
|                         | putative glu   | 0.96 | 0.11 | 1 | 1.01 | 0.79 | 1   | 0.95 |
| sfbC                    | ABC transp     | 1.01 | 0.08 | 1 | 0.88 | 0.14 | 1   | 0.8  |
| ytfB                    | conserved      | 1.07 | 0.13 | 1 | 1.29 | 0.17 | 1   | 1.11 |
|                         | regulatory p   | 0.97 | 0.07 | 1 | 1.3  | 0.09 | 1   | 1.23 |
| gabP                    | GabA perr      | 0.99 | 0.06 | 1 | 1.1  | 0.21 | 1   | 1.22 |
|                         | probable tra   | 0.98 | 0.08 | 1 | 1.17 | 0.06 | 1   | 1.14 |
| sthB                    | putative fir   | 0.92 | 0.07 | 1 | 1.05 | 0.1  | 1   | 1.27 |
|                         | putative lipi  | 1.05 | 0.12 | 1 | 1.27 | 0.16 | 1   | 1.3  |
| onal repressor (DeoR fa |                | 1.06 | 0.11 | 1 | 1.17 | 0.13 | 1   | n/a  |
| rotein                  |                | 0.34 | 0.09 | 1 | 1.07 | 0.14 | 1   | n/a  |
| katG                    | catalase (h    | 1.03 | 0.09 | 1 | 1.2  | 0.06 | 1   | 1.17 |
| pabB                    | para-aminc     | 1.04 | 0.06 | 1 | 0.83 | 0.12 | 1   | 0.91 |
| fimF                    | fimbria-like   | 0.89 | 0.13 | 1 | 0.97 | 0.19 | 1   | 0.91 |
| rbn                     | ribonucleas    | 1.05 | 0.07 | 1 | 1.36 | 0.13 | 1   | 1.31 |
| crcB                    | putative me    | 1.08 | 0.1  | 1 | 0.95 | 0.19 | 1   | 0.71 |
| fnt                     | methionyl-t    | 1    | 0.12 | 1 | 1.1  | 0.26 | 1   | 1.23 |
| pagD                    | putative ou    | 0.92 | 0.06 | 1 | 0.99 | 0.21 | 1   | 0.79 |
| yijC                    | possible Te    | 0.78 | 0.07 | 1 | 1.4  | 0.16 | 1   | 1.18 |
| citB                    | citrate utiliz | 1.02 | 0.09 | 1 | 0.98 | 0.09 | 1   | 0.84 |
| sdhC                    | succinate c    | 0.94 | 0.07 | 1 | 0.91 | 0.15 | 1   | 0.78 |
| serC                    | phosphose      | 0.99 | 0.06 | 1 | 0.87 | 0.09 | 1   | 0.77 |
| entD                    | enterobacti    | 0.77 | 0.07 | 1 | 1.04 | 0.09 | 1   | 0.94 |
| nirD                    | nitrite redu   | 0.83 | 0.08 | 1 | 1.2  | 0.44 | 1   | 1.18 |
| thiE                    | thiamine-pl    | 0.5  | 0.08 | 1 | 1.33 | 0.18 | 1   | 1.33 |
| livK                    | leucine-spe    | 0.97 | 0.06 | 1 | 1.3  | 0.14 | 1   | 1.19 |
| ft                      |                | 0.84 | 0.18 | 1 | 1.12 | 0.33 | n/a | 1.11 |
|                         | putative es    | 1.01 | 0.08 | 1 | 0.9  | 0.29 | 1   | 0.79 |
| flgM                    | negative re    | 1.02 | 0.06 | 1 | 1.01 | 0.38 | 1   | 0.75 |
| yhdH                    | possible ox    | 1.03 | 0.11 | 1 | 1.22 | 0.18 | 1   | 1.22 |
|                         | putative se    | 0.99 | 0.11 | 1 | 1.19 | 0.18 | 1   | 1.14 |
|                         | putative me    | 0.92 | 0.15 | 1 | 1.2  | 0.18 | 0   | 0.9  |
|                         | hypothetica    | 1.08 | 0.16 | 1 | 0.91 | 0.23 | 1   | 0.82 |
| yihS                    |                | 0.89 | 0.13 | 1 | 1.34 | 0.17 | 1   | 1.38 |
| oadA                    | oxaloaceta     | 0.62 | 0.07 | 1 | 1.15 | 0.08 | n/a | 1.12 |
| bfcC                    |                | 0.89 | 0.02 | 1 | 1.07 | 0.09 | 1   | 1.08 |

|                 |              |      |      |   |      |          |       |      |
|-----------------|--------------|------|------|---|------|----------|-------|------|
| pduG            | PduG prote   | 0.9  | 0.03 | 1 | 0.94 | 0.12     | 1     | 0.88 |
| fumB            | fumarate h   | 0.98 | 0.06 | 1 | 1.18 | 0.1      | 1     | 1.14 |
| otsB            | trehalose p  | 0.9  | 0.1  | 1 | 0.85 | 0.15 n/a |       | 0.8  |
| ppx             | exopolyphc   | 0.92 | 0.07 | 1 | 0.96 | 0.15     | 1     | 0.98 |
|                 | putative me  | 1.09 | 0.14 | 1 | 1.37 | 0.34     | 1     | 0.98 |
|                 | putative ex  | 1.02 | 0.06 | 1 | 1.02 | 0.13     | 1     | 1.01 |
| citX2           | citx protein | 0.96 | 0.14 | 1 | 1.14 | 0.09     | 1     | 0.87 |
| emrD            | multidrug r  | 0.91 | 0.08 | 1 | 1.44 | 0.14     | 1     | 1.23 |
| ubiE            | ubiquinone   | 0.99 | 0.04 | 1 | 1.34 | 0.15     | 1     | 1.26 |
|                 | conserved    | 1.12 | 0.14 | 1 | 1.4  | 0.28     | 1     | 1.2  |
| rfbU            | putative gly | 0.85 | 0.11 | 1 | 0.83 | 0.05     | 1     | 0.88 |
| yfdC            | putative me  | 0.87 | 0.32 | 0 | 1.09 | 0.41     | 0     | 0.73 |
| minE            | cell divisor | 1.08 | 0.09 | 1 | 1.21 | 0.3      | 0     | 0.94 |
| yciA            | putative ac  | 1.08 | 0.09 | 1 | 0.83 | 0.19     | 1     | 0.74 |
| gcvA            | regulatory p | 0.91 | 0.05 | 1 | 1.1  | 0.07     | 1     | 1.12 |
|                 | conserved    | 1.04 | 0.12 | 1 | 1.03 | 0.09     | 1     | 1.11 |
|                 | hypothetica  | 0.93 | 0.12 | 1 | 1.27 | 0.17     | 1     | 1.31 |
| nfnB            | oxygen-ins   | 0.95 | 0.09 | 1 | 0.92 | 0.15     | 1     | 0.86 |
| hslU            | heat shock   | 0.93 | 0.06 | 1 | 1.46 | 0.17     | 1     | 1.34 |
| pduS            | putative fer | 0.72 | 0.04 | 1 | 0.87 | 0.13     | 1     | 0.88 |
| pIdA            | detergent-r  | 1.01 | 0.1  | 1 | 1.44 | 0.24     | 1     | 1.28 |
| rffT            | probable 4-  | 0.97 | 0.06 | 1 | 1.35 | 0.19     | 1     | 1.09 |
|                 | conserved    | 0.86 | 0.07 | 1 | 0.8  | 0.12     | 1     | 0.88 |
| stdC            | probable fir | 0.85 | 0.12 | 1 | 1.09 | 0.14     | 1     | 1.23 |
|                 | conserved    | 0.98 | 0.07 | 1 | 1.13 | 0.2      | 1     | 1.18 |
| phnR            | probable re  | 0.97 | 0.08 | 1 | 0.98 | 0.11     | 1     | 0.94 |
| tatB            | sec-indepe   | 0.99 | 0.08 | 1 | 1.49 | 0.1      | 1     | 1.28 |
| allR            | negative re  | 1.05 | 0.09 | 1 | 1.12 | 0.09     | 1     | 0.88 |
| sin, PTS system |              | 0.13 | 0.05 | 1 | 1.13 | 0.17     | 1 n/a |      |
| ykgC            | probable p   | 0.96 | 0.08 | 1 | 1.17 | 0.26     | 1     | 0.83 |
| cstA            | carbon stai  | 1.08 | 0.1  | 1 | 0.98 | 0.24     | 1     | 0.77 |
|                 | putative ph  | 1.06 | 0.07 | 1 | 0.83 | 0.17     | 1     | 0.72 |
|                 | putative tra | 0.58 | 0.08 | 1 | 0.67 | 0.19     | 1     | 0.62 |
|                 | putative re  | 0.99 | 0.1  | 1 | 0.76 | 0.26     | 1     | 0.73 |
|                 | putative pe  | 1.06 | 0.08 | 1 | 0.79 | 0.17     | 1     | 0.81 |
|                 | ABC transp   | 0.96 | 0.28 | 1 | 0.78 | 0.19     | 1     | 0.69 |
| ruvB            | Holliday jur | 0.82 | 0.07 | 1 | 0.76 | 0.14     | 1     | 0.88 |
| ybaL            | putative tra | 0.96 | 0.04 | 1 | 0.96 | 0.06     | 1     | 0.8  |
| dcuC            | C4-dicarbo   | 0.92 | 0.07 | 1 | 0.98 | 0.09     | 1     | 0.81 |
|                 | putative PT  | 1.02 | 0.05 | 1 | 1.35 | 0.1      | 1     | 1.34 |
|                 | putative an  | 0.87 | 0.04 | 1 | 0.97 | 0.07     | 1     | 0.85 |
| entE            | 2,3-dihydro  | 0.88 | 0.07 | 1 | 1.03 | 0.1      | 1     | 0.94 |
|                 | phage inte   | 0.84 | 0.17 | 1 | 1.06 | 0.14     | 1     | 1.24 |
| tdk             | thymidine k  | 0.95 | 0.05 | 1 | 0.76 | 0.18     | 1     | 0.73 |
| srfC            | putative vir | 0.9  | 0.07 | 1 | 0.77 | 0.07     | 1     | 0.79 |
| hrpA            | ATP-deper    | 0.96 | 0.09 | 1 | 0.72 | 0.07     | 1     | 0.77 |
|                 | putative ex  | 0.75 | 0.13 | 1 | 0.76 | 0.16     | 1     | 0.75 |
|                 | hypothetica  | 0.91 | 0.3  | 0 | 1.25 | 0.53     | 0     | 0.83 |
| clpB            | ClpB protei  | 0.94 | 0.07 | 1 | 1.1  | 0.11     | 1     | 0.99 |
|                 |              | 0.97 | 0.07 | 1 | 1.16 | 0.12     | 1     | 1.14 |
|                 | hypothetica  | 1.01 | 0.1  | 1 | 1.08 | 0.16     | 1     | 0.82 |
| xidase          |              | 0.12 | 0.04 | 1 | 1.14 | 0.14     | 1 n/a |      |



|                           |               |      |      |   |      |      |   |      |
|---------------------------|---------------|------|------|---|------|------|---|------|
| ybaO                      | hypothetica   | 0.99 | 0.08 | 1 | 1.03 | 0.09 | 1 | 0.89 |
|                           | conserved     | 1    | 0.12 | 1 | 1.04 | 0.21 | 1 | 1.27 |
| lldP                      | L-lactate pe  | 0.82 | 0.07 | 1 | 1.23 | 0.13 | 1 | 1.27 |
| yidE                      | putative me   | 0.98 | 0.04 | 1 | 1.47 | 0.13 | 1 | 1.24 |
| recD                      | exonucleas    | 0.91 | 0.08 | 1 | 1.15 | 0.15 | 1 | 1.03 |
| stdB                      | probable or   | 0.89 | 0.07 | 1 | 1.1  | 0.12 | 1 | 1.24 |
|                           | probable pu   | 0.91 | 0.04 | 1 | 1.01 | 0.16 | 1 | 0.85 |
| yhjH                      | conserved     | 1.01 | 0.04 | 1 | 1.24 | 0.11 | 1 | 1.21 |
|                           | putative ac   | 1.05 | 0.07 | 1 | 1.29 | 0.19 | 1 | 1.24 |
| selB                      | selenocyst    | 0.87 | 0.06 | 1 | 1.39 | 0.16 | 1 | 1.05 |
| radC                      | putative DN   | 0.97 | 0.06 | 1 | 1.39 | 0.07 | 1 | 1.38 |
|                           | putative PT   | 0.98 | 0.1  | 1 | 1.29 | 0.22 | 1 | 1.26 |
| kdpC                      | potassium-    | 1.07 | 0.12 | 1 | 0.91 | 0.13 | 1 | 0.78 |
|                           | conserved     | 1    | 0.08 | 1 | 1.16 | 0.16 | 1 | 1.07 |
| emrR                      | putative tra  | 1.03 | 0.1  | 1 | 1.12 | 0.34 | 1 | 1.19 |
| baeS                      | putative tw   | 0.9  | 0.07 | 1 | 0.9  | 0.18 | 1 | 0.87 |
| yejA                      | putative tra  | 1.05 | 0.09 | 1 | 0.88 | 0.06 | 1 | 0.9  |
|                           | putative gly  | 0.96 | 0.06 | 1 | 0.86 | 0.24 | 1 | 0.81 |
| yehZ                      | putative pe   | 1.01 | 0.12 | 1 | 0.84 | 0.09 | 1 | 1.01 |
|                           | putative hy   | 1.05 | 0.24 | 0 | 1.17 | 0.39 | 0 | 0.93 |
|                           |               | 0.12 | 0.04 | 1 | 0.86 | 0.13 | 1 | n/a  |
|                           | FAA-hydrol    | 0.99 | 0.03 | 1 | 0.86 | 0.14 | 1 | 0.87 |
|                           | conserved     | 0.91 | 0.1  | 1 | 0.92 | 0.03 | 1 | 0.82 |
| tag                       | 3-methylad    | 1.18 | 0.1  | 1 | 1.34 | 0.19 | 1 | 1.32 |
|                           | putative rib  | 0.99 | 0.07 | 1 | 1.28 | 0.1  | 1 | 1.18 |
| yalL                      | conserved     | 0.95 | 0.08 | 1 | 1.36 | 0.19 | 1 | 1.33 |
|                           | putative lip  | 0.96 | 0.1  | 1 | 1.27 | 0.1  | 1 | 1.18 |
| nanA                      | N-acetylne    | 0.99 | 0.06 | 1 | 1.09 | 0.12 | 1 | 1.27 |
|                           | conserved     | 1.03 | 0.06 | 1 | 1.25 | 0.15 | 1 | 1.15 |
|                           | hypothetica   | 1.15 | 0.08 | 1 | 1.19 | 0.08 | 1 | 1.21 |
| hycB                      | formate hy    | 0.96 | 0.21 | 1 | 1.13 | 0.08 | 1 | 1.05 |
|                           | putative me   | 1.04 | 0.05 | 1 | 1    | 0.24 | 1 | 1.11 |
| sseD                      | putative pa   | 1.07 | 0.08 | 1 | 0.71 | 0.05 | 1 | 0.73 |
| scsC                      | secreted pi   | 0.98 | 0.07 | 1 | 0.94 | 0.07 | 1 | 0.84 |
| rtter                     |               | 0.18 | 0.04 | 1 | 0.94 | 0.11 | 1 | n/a  |
|                           | transcriptio  | 0.98 | 0.32 | 1 | 0.93 | 0.19 | 1 | 0.85 |
| ttrR                      | putative tw   | 1.06 | 0.15 | 1 | 0.75 | 0.14 | 1 | 0.77 |
| gpmA                      | phosphogly    | 0.98 | 0.05 | 1 | 0.93 | 0.08 | 1 | 0.79 |
|                           | putative inr  | 0.95 | 0.04 | 1 | 0.81 | 0.15 | 1 | 0.77 |
| ylil                      | putative ox   | 0.67 | 0.05 | 1 | 0.86 | 0.1  | 1 | 0.8  |
|                           | conserved     | 0.91 | 0.07 | 1 | 1.23 | 0.16 | 1 | 1.37 |
| fliJ                      | flagellar Fli | 1.07 | 0.08 | 1 | 0.82 | 0.12 | 1 | 0.88 |
|                           | possible tra  | 0.88 | 0.02 | 1 | 1.17 | 0.05 | 1 | 1.22 |
| ne protein                |               | 0.36 | 0.08 | 1 | 0.9  | 0.42 | 1 | n/a  |
| fer flavoprotein alpha si |               | 0.08 | 0.02 | 1 | 0.94 | 0.12 | 1 | n/a  |
| nt aldehyde dehydroge     |               | 0.04 | 0.01 | 1 | 1.2  | 0.09 | 1 | n/a  |
|                           | hypothetica   | 0.99 | 0.08 | 1 | 1.18 | 0.14 | 1 | 1.1  |
|                           | hpothetical   | 0.94 | 0.08 | 1 | 1.05 | 0.09 | 1 | 0.86 |
| rotein                    |               | 0.12 | 0.02 | 1 | 1.16 | 0.19 | 1 | n/a  |
|                           | conserved     | 1    | 0.07 | 1 | 0.91 | 0.14 | 1 | 0.74 |
| rotein                    |               | 1.08 | 0.09 | 1 | 1.04 | 0.16 | 1 | 0.9  |
|                           |               | 0.91 | 0.15 | 1 | 1    | 0.1  | 1 | 0.96 |

|                            |               |       |      |     |      |      |     |      |
|----------------------------|---------------|-------|------|-----|------|------|-----|------|
| ramA                       | transcriptio  | 0.95  | 0.13 | 1   | 1    | 0.09 | 1   | 0.81 |
|                            | putative mε   | 0.98  | 0.05 | 1   | 1.03 | 0.18 | 1   | 0.88 |
|                            | hydrogenas    | 1.08  | 0.11 | 1   | 0.73 | 0.07 | 1   | 0.76 |
| rotein                     |               | 0.15  | 0.04 | 1   | 0.94 | 0.08 | 1   | n/a  |
| ne protein                 |               | 0.27  | 0.07 | 1   | 0.96 | 0.07 | 1   | n/a  |
| yfaE                       | putative fer  | 0.92  | 0.12 | 1   | 0.99 | 0.08 | 1   | 1    |
|                            | conserved     | 1.01  | 0.08 | 1   | 1.28 | 0.12 | 1   | 1.16 |
|                            | putative ph   | 0.95  | 0.07 | 1   | 0.84 | 0.11 | 1   | 0.75 |
| ybdQ                       | conserved     | 1     | 0.04 | 1   | 0.88 | 0.19 | 1   | 0.84 |
|                            | putative DN   | 0.96  | 0.1  | 1   | 1.33 | 0.19 | 1   | 1.21 |
| tdh                        | threonine 3   | 0.98  | 0.1  | 1   | 1.36 | 0.1  | 1   | 1.2  |
|                            | putative PT   | 1.09  | 0.06 | 1   | 1.39 | 0.18 | 1   | 1.37 |
| hsIS                       | heat shock    | 0.95  | 0.08 | 1   | 1.65 | 0.34 | 1   | 1.25 |
|                            | putative lipi | 1.02  | 0.06 | 1   | 1.53 | 0.35 | 1   | 1.18 |
| -inducible protein, rese   |               | 0.26  | 0.06 | 1   | 1.19 | 0.11 | 1   | n/a  |
| stops following codons     |               | 1.08  | 0.11 | 0   | 1.27 | 0.46 | 0   | n/a  |
| cdh                        |               | 0.83  | 0.11 | 0   | 1.35 | 0.32 | 0   | 1.35 |
| / oxidative stress         |               | 1.04  | 0.14 | 0   | 1.32 | 0.49 | 0   | n/a  |
|                            | hypothetica   | 0.88  | 0.3  | 0   | 1.56 | 3.19 | 0   | 1.03 |
| cle, RNA component         |               | 0.91  | 0.22 | 1   | 1.17 | 0.49 | 0   | n/a  |
| malY                       |               | 1.23  | 0.18 | 0   | 1.16 | 0.41 | 0   | 0.74 |
| ybiJ                       | putative ex   | 0.95  | 0.05 | 1   | 1.03 | 0.06 | 1   | 0.85 |
|                            | putative hy   | 0.97  | 0.06 | 1   | 0.94 | 0.14 | 1   | 0.83 |
|                            | putative lipi | 0.91  | 0.09 | 1   | 0.78 | 0.11 | 1   | 0.79 |
|                            | conserved     | 0.93  | 0.04 | 1   | 0.93 | 0.1  | 1   | 0.91 |
|                            |               | 0.03  | 0.01 | 1   | 0.73 | 0.07 | n/a | n/a  |
| ase III epsilon subunit (: |               | 0.06  | 0.02 | 1   | 0.72 | 0.09 | n/a | n/a  |
| riT nicking                |               | 0.08  | 0.02 | 1   | 0.73 | 0.16 | n/a | n/a  |
| rotein                     |               | 0.04  | 0.03 | 1   | 0.76 | 0.09 | n/a | n/a  |
| rotein                     |               | 0.04  | 0.01 | 1   | 0.71 | 0.05 | n/a | n/a  |
| rotein                     |               | 0.09  | 0.02 | 1   | 0.72 | 0.06 | n/a | n/a  |
|                            |               | 0.04  | 0.01 | 1   | 0.67 | 0.08 | n/a | n/a  |
|                            |               | n/a   | n/a  | n/a | n/a  | n/a  | n/a | n/a  |
|                            |               | 0.19  | 0.04 | 1   | 1.06 | 0.14 | n/a | n/a  |
|                            | conserved     | 1.07  | 0.07 | 1   | 0.9  | 0.1  | 1   | 0.85 |
|                            |               | 1.11  | 0.12 | 1   | 0.99 | 0.12 | n/a | 0.9  |
|                            |               | 1.04  | 0.09 | 1   | 1.05 | 0.13 | n/a | 0.86 |
|                            |               | 1.07  | 0.12 | 1   | 0.98 | 0.05 | n/a | 0.9  |
|                            |               | 0.99  | 0.25 | 1   | 0.97 | 0.09 | n/a | 0.84 |
|                            |               | 1.17  | 0.05 | 1   | 1.16 | 0.2  | n/a | 0.93 |
|                            | hypothetica   | 4.18  | 3.01 | 1   | n/a  | n/a  | n/a | 0.83 |
| tinR                       | transcriptio  | 1.01  | 0.32 | 0   | n/a  | n/a  | n/a | 0.72 |
| betA                       | bacterioph:   | 10.66 | 5.52 | 1   | n/a  | n/a  | n/a | 0.79 |
|                            | hypothetica   | 5.05  | 3.35 | 1   | n/a  | n/a  | n/a | 0.74 |
|                            | putative ba   | 17.66 | 3.18 | 1   | n/a  | n/a  | n/a | 0.75 |
|                            |               | 1.69  | 0.23 | 1   | 1.01 | 0.07 | n/a | 0.9  |
| tolA                       | tolA proteir  | 1.06  | 0.06 | 1   | 0.93 | 0.03 | n/a | 0.82 |
|                            |               | 0.6   | 0.05 | 1   | 0.89 | 0.08 | n/a | 0.82 |
|                            | hypothetica   | 7.49  | 1.62 | 1   | n/a  | n/a  | n/a | 0.81 |
|                            | putative ba   | 18.82 | 7.9  | 1   | n/a  | n/a  | n/a | 0.77 |
|                            | hypothetica   | 16.25 | 6.18 | 1   | n/a  | n/a  | n/a | 1.12 |
|                            | conserved     | 1.33  | 0.18 | 1   | 1.02 | 0.08 | n/a | 0.8  |

|                          |               |       |       |   |     |      |       |      |
|--------------------------|---------------|-------|-------|---|-----|------|-------|------|
|                          | putative me   | 5.15  | 2.42  | 1 | n/a | n/a  | n/a   | 0.68 |
|                          | putative ba   | 27.73 | 14.5  | 1 | n/a | n/a  | n/a   | 0.81 |
|                          | putative ba   | 22.9  | 7.11  | 1 | n/a | n/a  | n/a   | 0.68 |
| steE                     | fimbrial sut  | 13.36 | 8.69  | 1 | n/a | n/a  | n/a   | 1.01 |
|                          | putative ex   | 7.62  | 0.83  | 1 | n/a | n/a  | n/a   | 1.15 |
|                          | putative ba   | 6.1   | 0.64  | 1 | n/a | n/a  | n/a   | 0.69 |
|                          | putative ba   | 26.13 | 11.99 | 1 | n/a | n/a  | n/a   | 0.72 |
|                          | putative ba   | 15.74 | 9.3   | 1 | n/a | n/a  | n/a   | 0.75 |
|                          | hypothetica   | 9.7   | 2.01  | 1 | n/a | n/a  | n/a   | 0.82 |
|                          | putative me   | 21.28 | 4.5   | 1 | n/a | n/a  | n/a   | 0.84 |
|                          | hypothetica   | 2.24  | 0.56  | 0 | n/a | n/a  | n/a   | 1.19 |
| sefC                     | outer mem     | 12.43 | 6.8   | 1 | n/a | n/a  | n/a   | 1.07 |
|                          |               | 1.44  | 0.15  | 1 |     | 1.03 | 0.12  | n/a  |
|                          | DNA helica    | 13.98 | 6.91  | 1 | n/a | n/a  | n/a   | 1.06 |
|                          | putative me   | 7.94  | 2.54  | 1 | n/a | n/a  | n/a   | 1.15 |
|                          | protein kin   | 9.89  | 7.15  | 1 | n/a | n/a  | n/a   | 1.13 |
|                          | probable re   | 1.23  | 0.32  | 1 | n/a | n/a  | n/a   | 1.12 |
|                          | putative ex   | 61.05 | 10.95 | 1 | n/a | n/a  | n/a   | 1.07 |
|                          | hypothetica   | 19.82 | 5.54  | 1 | n/a | n/a  | n/a   | 1.25 |
| sopE                     | invasion-as   | 5.2   | 2.09  | 1 | n/a | n/a  | n/a   | 1.02 |
|                          | Putative m    | 5.85  | 1.05  | 1 | n/a | n/a  | n/a   | 1.07 |
|                          | probable pl   | 14.59 | 5.91  | 1 | n/a | n/a  | n/a   | 1.06 |
|                          | putative lip  | 20.72 | 3.1   | 1 | n/a | n/a  | n/a   | 1.23 |
| yidR                     | putative AT   | 1.01  | 0.09  | 1 |     | 1.71 | 0.35  | 1    |
| yidA                     | conserved     | 0.77  | 0.15  | 1 |     | 1.29 | 0.2   | 1    |
| pstB                     | phosphate     | 1.03  | 0.13  | 1 |     | 1.29 | 0.25  | 1    |
| uhpA                     | Two-compr     | 1.03  | 0.13  | 1 |     | 1.41 | 0.18  | 1    |
|                          | putative me   | 1.16  | 0.13  | 1 |     | 1.25 | 0.29  | 1    |
|                          |               | 0.91  | 0.1   | 1 |     | 1.22 | 0.29  | 1    |
|                          | conserved     | 1.07  | 0.12  | 1 |     | 1.06 | 0.88  | 1    |
|                          | possible m    | 0.98  | 0.11  | 1 |     | 1    | 0.91  | 1    |
| or for envCD (acrEF) (1  |               | 0.27  | 0.05  | 1 |     | 1.13 | 0.17  | 1    |
|                          | probable pr   | 1.04  | 0.66  | 1 |     | 0.89 | 0.17  | 1    |
| nagA                     | N-acetylglu   | 0.95  | 0.17  | 1 |     | 0.83 | 0.23  | 1    |
| ffinity potassium transp |               | 0.86  | 0.13  | 1 |     | 0.87 | 0.15  | 1    |
|                          | putative me   | 1.17  | 0.08  | 1 |     | 0.64 | 0.05  | 1    |
| ar membrane usher pro    |               | 0.07  | 0.04  | 1 |     | 1.17 | 0.2   | 1    |
| rnpA                     | RNase P, p    | 1.01  | 0.12  | 1 |     | 1.35 | 0.21  | 1    |
| inate 5-dehydrogenase    |               | 1.1   | 0.06  | 1 |     | 1.27 | 22.44 | 1    |
| yaal                     | conserved     | 0.98  | 0.16  | 1 |     | 1.13 | 0.14  | 1    |
| pagC                     | outer mem     | 1.06  | 0.17  | 1 |     | 0.64 | 0.19  | 1    |
| rpoE                     | RNA polym     | 0.1   | 0.01  | 1 |     | 0.96 | 0.15  | 1    |
| rbsK                     | ribokinase    | 0.99  | 0.06  | 1 |     | 1.09 | 0.19  | 1    |
| caiF                     | transcriptio  | 1.06  | 0.1   | 1 |     | 1.08 | 0.11  | 1    |
| ftsI                     | penicillin-bi | 0.93  | 0.05  | 1 |     | 1.05 | 0.06  | 1    |
| yach                     | putative ex   | 1.11  | 0.12  | 1 |     | 1.06 | 0.18  | 1    |
| yhdJ                     | putative ad   | 1.01  | 0.14  | 1 |     | 1.4  | 0.23  | 1    |
|                          | putative AE   | 0.98  | 0.13  | 1 |     | 0.69 | 0.25  | 1    |
| yheL                     | conserved     | 1.05  | 0.16  | 1 |     | 1.11 | 0.34  | 1    |
| holB                     | DNA polym     | 1.07  | 0.07  | 1 |     | 0.81 | 0.34  | 1    |
|                          | conserved     | 0.91  | 0.13  | 1 |     | 0.99 | 0.65  | 1    |
|                          | putative me   | 1.1   | 0.09  | 1 |     | 1    | 0.3   | 0    |

|                           |                    |      |      |   |      |          |       |      |
|---------------------------|--------------------|------|------|---|------|----------|-------|------|
| wzxC                      | putative tra       | 1.08 | 0.13 | 1 | 0.9  | 0.1      | 1     | 0.83 |
| hofQ                      | type II secr       | 0.93 | 0.06 | 1 | 1.1  | 0.24     | 1     | 1.26 |
|                           | putative m         | 1.01 | 0.11 | 1 | 1.12 | 0.31     | 1     | 0.76 |
|                           | hypothetica        | 1.04 | 0.15 | 1 | 1.25 | 0.36     | 0     | 0.8  |
| manC                      | mannose-1          | 1.05 | 0.19 | 1 | 1.05 | 0.24     | 1     | 0.91 |
|                           | hypothetica        | 0.98 | 0.17 | 1 | 0.9  | 0.2      | 1     | 0.96 |
| ne protein                |                    | 0.08 | 0.12 | 1 | 1.07 | 0.35     | 1 n/a |      |
| gapA                      | glyceraldeh        | 0.97 | 0.12 | 1 | 0.9  | 0.1      | 1     | 0.88 |
| yegE                      | putative m         | 1.02 | 0.07 | 1 | 0.85 | 0.27     | 1     | 0.87 |
| mog                       | molybdopte         | 0.86 | 0.13 | 1 | 1.12 | 0.19     | 1     | 1.11 |
|                           | probable se        | 1.08 | 0.17 | 1 | 1.03 | 0.28     | 1     | 0.9  |
|                           | conserved          | 0.98 | 0.14 | 1 | 1.05 | 0.64     | 1     | 0.95 |
| able tail assembly prot   |                    | 0.08 | 0.05 | 1 | 0.86 | 0.31 n/a | n/a   |      |
| ate lyase II              |                    | 0.09 | 0.03 | 1 | 1.4  | 0.23     | 1 n/a |      |
|                           | cytochrome         | 0.89 | 0.11 | 1 | 1.11 | 0.37     | 1     | 0.97 |
| rotein                    |                    | 0.18 | 0.07 | 1 | 0.92 | 0.16     | 1 n/a |      |
|                           | putative m         | 0.96 | 0.07 | 1 | 0.85 | 0.12     | 1     | 0.92 |
|                           | conserved          | 1.09 | 0.02 | 1 | 0.82 | 0.21     | 1     | 0.92 |
| ne protein                |                    | 0.2  | 0.13 | 1 | 0.95 | 0.35     | 0 n/a |      |
|                           |                    | 0.18 | 0.16 | 1 | 0.84 | 0.28     | 1 n/a |      |
|                           |                    | 0.1  | 0.11 | 1 | 0.9  | 0.17 n/a | n/a   |      |
|                           |                    | 0.98 | 0.11 | 1 | 1.04 | 0.21     | 1     | 1.03 |
| yfhG                      | putative m         | 0.93 | 0.15 | 1 | 0.93 | 0.18     | 1     | 1    |
| ygjM                      | conserved          | 1.14 | 0.17 | 1 | 1.15 | 0.54     | 0     | 1.26 |
| ltransferase              |                    | 0.12 | 0.05 | 1 | 1.2  | 0.09     | 1 n/a |      |
| hypA                      | HypA prote         | 0.97 | 0.13 | 1 | 1.12 | 0.24     | 1     | 1.14 |
| cysD                      | ATP sulfur         | 1    | 0.09 | 1 | 1.09 | 0.2      | 1     | 1.04 |
| ive integrase             |                    | 0.14 | 0.04 | 1 | 0.85 | 0.07     | 1 n/a |      |
| talA                      | transaldola        | 0.95 | 0.15 | 1 | 0.84 | 0.08     | 1     | 0.97 |
| trxB                      | thioredoxin        | 0.99 | 0.14 | 1 | 0.89 | 0.12     | 1     | 0.81 |
| kdsB                      | 3-deoxy-m          | 1.02 | 0.21 | 1 | 0.97 | 0.26     | 1     | 0.87 |
|                           | conserved          | 0.88 | 0.15 | 1 | 0.86 | 0.39     | 1     | 0.84 |
| ilar to tail assembly pro |                    | 0.17 | 0.03 | 1 | 0.97 | 0.14 n/a | n/a   |      |
| ytfK                      | conserved          | 1.09 | 0.14 | 0 | 1.19 | 0.57     | 0     | 1.16 |
| glpT                      | glycerol-3- $\phi$ | 0.98 | 0.09 | 1 | 0.8  | 0.21     | 1     | 0.89 |
|                           | putative su        | 1.06 | 0.25 | 0 | 1.12 | 0.37     | 0     | 0.95 |
| motA                      | motility pro       | 1.14 | 0.11 | 1 | 0.76 | 0.15     | 1     | 0.81 |
| dedD                      | DedD prote         | 1.11 | 0.07 | 1 | 0.93 | 0.23     | 1     | 0.88 |
|                           | ABC transp         | 1.14 | 0.16 | 1 | 0.77 | 0.17     | 1     | 0.74 |
| ribE                      | riboflavin s       | 0.99 | 0.09 | 1 | 0.81 | 0.35     | 1     | 0.79 |
| rluB                      | putative rib       | 1.09 | 0.18 | 1 | 0.83 | 0.12     | 1     | 0.73 |
| bcfE                      | fimbrial sut       | 1.02 | 0.09 | 1 | 1.18 | 0.27     | 1     | 1.22 |
|                           | conserved          | 1.01 | 0.1  | 1 | 0.87 | 0.16     | 1     | 0.93 |
|                           | conserved          | 1.02 | 0.08 | 1 | 0.79 | 0.24     | 0     | 0.89 |
| rnr                       | ribonucleas        | 0.91 | 0.09 | 1 | 1.08 | 0.1      | 1     | 1.09 |
| ytfG                      | conserved          | 1.03 | 0.07 | 1 | 1.15 | 0.12     | 1     | 1.09 |
| on factor SsrB, similar   |                    | 0.09 | 0.04 | 1 | 1.02 | 0.39     | 1 n/a |      |
| ermosensitive             |                    | 0.17 | 0.04 | 1 | 1.14 | 0.25     | 1 n/a |      |
|                           | hypothetica        | 0.99 | 0.07 | 1 | 1.19 | 0.23     | 1     | 1.19 |
|                           | putative tra       | 1.11 | 0.15 | 1 | 0.83 | 0.16     | 1     | 0.87 |
| d factor, vWF type A dc   |                    | 0.18 | 0.06 | 1 | 0.86 | 0.24     | 1 n/a |      |
|                           | putative m         | 1.01 | 0.21 | 1 | 0.88 | 0.14     | 1     | 0.88 |

|                            |               |      |      |   |      |      |     |      |
|----------------------------|---------------|------|------|---|------|------|-----|------|
| flhC                       | flagellar tra | 1.04 | 0.11 | 1 | 0.81 | 0.2  | 1   | 0.79 |
|                            | probable m    | 1.35 | 0.2  | 1 | 0.98 | 0.09 | 1   | 1.15 |
|                            | putative co   | 0.96 | 0.36 | 1 | 1.11 | 1.03 | 1   | 1.01 |
| kgtP                       | alpha-ketoq   | 1.08 | 0.17 | 1 | 1.02 | 0.17 | 1   | 1.05 |
|                            | probable te   | 1.01 | 0.09 | 1 | 1.06 | 0.33 | 1   | 0.84 |
| cobS                       | cobalamin     | 1.15 | 0.07 | 1 | 0.7  | 0.11 | 1   | 0.85 |
| lysC                       | lysine-sens   | 1.08 | 0.18 | 1 | 1.25 | 0.27 | 1   | 1.22 |
| gshA                       | gamma-glu     | 1.03 | 0.09 | 1 | 1    | 0.41 | 1   | 1.28 |
|                            |               | 0.09 | 0.06 | 1 | 0.8  | 0.29 | 1   | n/a  |
| fliP                       | flagellar bic | 0.99 | 0.06 | 1 | 0.94 | 0.22 | 1   | 0.89 |
| prgH                       | pathogenic    | 0.92 | 0.16 | 1 | 1.13 | 0.28 | 1   | 1.2  |
| flhA                       | flagellar bic | 1.12 | 0.13 | 1 | 0.8  | 0.16 | 1   | 0.89 |
| rflB                       | putative rec  | 1.09 | 0.19 | 1 | 0.84 | 0.28 | 1   | 1    |
| rbsD                       | high affinity | 0.92 | 0.17 | 1 | 1.29 | 0.25 | 1   | 1.37 |
| tsf                        | elongation    | 0.94 | 0.12 | 1 | 1.01 | 0.27 | 1   | 0.9  |
| psiF                       | phosphate     | 0.94 | 0.11 | 1 | 1.15 | 0.34 | 1   | 1.07 |
| yjbC                       | putative ps   | 0.97 | 0.1  | 1 | 1.24 | 0.09 | 1   | 1.3  |
| caiT                       | probable ca   | 0.95 | 0.15 | 1 | 0.99 | 0.11 | 1   | 1    |
|                            | conserved     | 0.99 | 0.16 | 1 | 0.73 | 0.12 | 1   | 0.81 |
| etoacetyl-CoA transfer     |               | 0.07 | 0.03 | 1 | 0.79 | 0.09 | 1   | n/a  |
| add                        | adenosine     | 1.05 | 0.09 | 1 | 0.64 | 0.72 | 1   | 0.74 |
|                            | conserved     | 0.45 | 0.04 | 1 | 0.93 | 0.13 | n/a | 0.76 |
|                            | putative ac   | 1.1  | 0.11 | 1 | 1.08 | 0.2  | 1   | 1.25 |
| folD                       | Fold bifunc   | 0.85 | 0.15 | 1 | 1.01 | 0.28 | 1   | 0.97 |
| ilar to phage tail compo   |               | 0.28 | 0.12 | 1 | 1.05 | 0.32 | 1   | n/a  |
|                            | conserved     | 0.96 | 0.12 | 1 | 1.14 | 0.1  | 1   | 1.29 |
| secB                       | protein-exp   | 1    | 0.11 | 1 | 1.22 | 0.25 | 1   | 1.45 |
| bioH                       | putative bic  | 1.06 | 0.09 | 1 | 1.26 | 0.21 | 1   | 1.16 |
| rotein                     |               | 0.18 | 0.08 | 1 | 1.2  | 0.13 | 1   | n/a  |
|                            | putative req  | 1.11 | 0.1  | 1 | 0.93 | 0.37 | 0   | 0.8  |
| ybbB                       | hypothetica   | 1.08 | 0.13 | 1 | 0.94 | 0.18 | 1   | 0.83 |
| ilar to minor tail protein |               | 0.16 | 0.05 | 1 | 0.95 | 0.19 | 1   | n/a  |
| zyme                       |               | 0.14 | 0.1  | 1 | 1.06 | 0.26 | n/a | n/a  |
| ytfF                       | putative me   | 1.02 | 0.13 | 1 | 1.09 | 0.1  | 1   | 1.23 |
|                            |               | 0.16 | 0.04 | 1 | 0.75 | 0.11 | n/a | n/a  |
|                            | conserved     | 1.02 | 0.1  | 1 | 1.04 | 0.08 | 1   | 1.13 |
| folB                       | dihydroneo    | 1.08 | 0.1  | 1 | 1.07 | 0.33 | 1   | 1.08 |
| glgA                       | glycogen s    | 1.05 | 0.13 | 1 | 1.13 | 0.15 | 1   | 1.1  |
|                            | putative me   | 1.01 | 0.14 | 1 | 1.23 | 0.28 | 1   | 1.42 |
| asrA                       | anaerobic s   | 1.06 | 0.13 | 1 | 1.06 | 0.16 | 1   | 1.15 |
| ptsG                       | PTS system    | 1.01 | 0.12 | 1 | 0.83 | 0.14 | 1   | 0.78 |
|                            | ATP/GTP-l     | 1.06 | 0.12 | 1 | 1.35 | 0.24 | 1   | 1.44 |
| dps                        | DNA protec    | 1.05 | 0.19 | 1 | 0.87 | 0.15 | 1   | 0.89 |
| moaA                       | molybdenu     | 0.99 | 0.13 | 1 | 0.83 | 0.87 | 1   | 0.85 |
| ssaT                       | putative typ  | 1.02 | 0.18 | 1 | 0.65 | 0.09 | 1   | 0.7  |
| yfeG                       | ethanolami    | 1.01 | 0.11 | 1 | 0.91 | 0.16 | 1   | 0.96 |
|                            | putative AE   | 1.07 | 0.12 | 1 | 1.31 | 0.13 | 1   | 1.41 |
| ybeB                       | conserved     | 1.03 | 0.14 | 1 | 1.12 | 0.17 | 1   | 0.91 |
|                            | hypothetica   | 0.87 | 0.1  | 1 | 1.21 | 0.25 | 1   | 0.91 |
| hisC                       | histidinol-pl | 0.89 | 0.08 | 1 | 0.83 | 0.24 | 1   | 0.85 |
| sapF                       | peptide tra   | 1.01 | 0.11 | 1 | 0.71 | 0.21 | 1   | 0.79 |
| adrA                       | adrA protei   | 0.95 | 0.16 | 1 | 1.03 | 0.18 | 1   | 0.86 |

|                         |               |      |      |   |      |          |       |      |
|-------------------------|---------------|------|------|---|------|----------|-------|------|
|                         | hypothetica   | 1.05 | 0.07 | 0 | 1.24 | 0.35     | 0     | 0.86 |
| ft                      |               | 0.96 | 0.12 | 1 | 0.9  | 0.16     | 1     | 0.89 |
| ybeZ                    | PhoH-like /   | 1.06 | 0.07 | 1 | 0.92 | 0.09     | 1     | 0.83 |
| phnA                    | conserved     | 1.05 | 0.14 | 1 | 1.12 | 0.16     | 1     | 1.36 |
|                         | conserved     | 0.96 | 0.09 | 1 | 0.69 | 0.04     | 1     | 0.82 |
|                         | large repeti  | 0.96 | 0.19 | 1 | 1.16 | 0.18     | 1     | 1.29 |
| waaJ                    | lipopolysac   | 0.96 | 0.16 | 1 | 1.54 | 0.28     | 1     | 1.47 |
| sopE2                   |               | 0.92 | 0.15 | 1 | 0.84 | 0.12     | 1     | 0.83 |
| hemE                    | uroporphyr    | 0.84 | 0.13 | 1 | 1.24 | 0.13     | 1     | 1.24 |
| atpG                    | ATP synthase  | 1.08 | 0.11 | 1 | 1.28 | 0.17     | 1     | 1.58 |
| ompC                    | outer mem     | 1    | 0.21 | 1 | 0.98 | 0.14     | 1     | 0.96 |
| ybhO                    | putative ph   | 0.85 | 0.11 | 1 | 0.98 | 0.21     | 1     | 0.87 |
| ybaD                    |               | 1.06 | 0.14 | 1 | 0.98 | 0.12     | 1     | 0.93 |
| sodA                    | manganese     | 1.09 | 0.1  | 1 | 1.15 | 0.16     | 1     | 1.28 |
| phsC                    | thiosulfate   | 1.01 | 0.14 | 1 | 0.77 | 0.08     | 1     | 0.78 |
| pspA                    | phage shock   | 0.99 | 0.14 | 1 | 0.77 | 0.32     | 1     | 0.8  |
| grpE                    | heat shock    | 0.95 | 0.1  | 1 | 1.2  | 0.26     | 1     | 1.07 |
| rpsE                    | 30S ribosom   | 1.07 | 0.11 | 1 | 1.04 | 0.24     | 1     | 1.17 |
| waaQ                    | lipopolysac   | 0.9  | 0.13 | 1 | 1.35 | 0.09     | 1     | 1.35 |
| hemG                    | protoporph    | 1.12 | 0.15 | 1 | 1.2  | 0.19     | 1     | 1.17 |
| lepA                    | GTP-binding   | 0.91 | 0.08 | 1 | 0.91 | 0.09     | 1     | 0.96 |
| yifL                    | putative lipi | 1.13 | 0.09 | 1 | 1.34 | 0.15     | 1     | 1.29 |
| rho                     | transcriptio  | 1.01 | 0.13 | 1 | 1.34 | 0.16     | 1     | 1.24 |
| fliN                    | flagellar mo  | 0.99 | 0.17 | 1 | 0.82 | 0.2      | 1     | 0.83 |
| dadX                    | alanine rac   | 0.99 | 0.17 | 1 | 0.88 | 0.2      | 1     | 0.82 |
| aroC                    | chorismate    | 0.94 | 0.11 | 1 | 0.9  | 0.08     | 1     | 0.91 |
| nuoF                    | NADH dehyd    | 0.95 | 0.09 | 1 | 0.89 | 0.11     | 1     | 0.98 |
| pyrE                    | orotate pho   | 0.91 | 0.13 | 1 | 1.22 | 0.28     | 1     | 1.41 |
|                         | probable m    | 1.95 | 0.27 | 1 | 0.98 | 0.07     | 1     | 1.15 |
| spaP                    | secretory p   | 1.05 | 0.11 | 1 | 1.17 | 0.17     | 1     | 1.1  |
| rhaA                    | L-rhamnos     | 0.93 | 0.09 | 1 | 1.44 | 0.23     | 1     | 1.41 |
| tatA                    | sec-indepe    | 1.02 | 0.13 | 1 | 1.15 | 0.25     | 1     | 1.18 |
| parC                    | topoisomer    | 0.83 | 0.12 | 1 | 1.09 | 0.11     | 1     | 1.22 |
| nupC                    | nucleoside    | 0.89 | 0.09 | 1 | 0.94 | 0.13     | 1     | 1.01 |
| ilvG                    | acetolactat   | 1    | 0.14 | 1 | 1.36 | 0.19     | 1     | 1.22 |
| araD                    | L-ribulose-5- | 0.93 | 0.07 | 1 | 1.04 | 0.13     | 1     | 1.09 |
| cysC                    | adenosine     | 1.07 | 0.13 | 1 | 1.07 | 0.16     | 1     | 1.07 |
|                         | possible de   | 0.99 | 0.32 | 1 | 1.02 | 0.09     | 1     | 1.14 |
|                         | conserved     | 0.95 | 0.09 | 1 | 1.27 | 0.2      | 1     | 1.36 |
| glxK                    | glycerate k   | 1.08 | 0.08 | 1 | 0.89 | 0.1      | 1     | 0.69 |
| dmsB                    | anaerobic c   | 1.02 | 0.1  | 1 | 0.74 | 0.06 n/a |       | 0.75 |
| sin, PTS system         |               | 0.21 | 0.13 | 1 | 1.09 | 0.41     | 1 n/a |      |
|                         | putative me   | 1.04 | 0.12 | 1 | 0.82 | 0.38     | 1     | 0.79 |
| topA                    | DNA topois    | 1.02 | 0.16 | 1 | 0.8  | 0.19     | 1     | 0.76 |
| heme-N, cytochrome B556 |               | 0.28 | 0.08 | 1 | 0.67 | 0.07     | 1 n/a |      |
| rnd                     | ribonucleas   | 1.03 | 0.12 | 1 | 0.73 | 0.09     | 1     | 0.8  |
| ldhA                    | D-lactate d   | 1.02 | 0.16 | 1 | 0.67 | 0.19     | 1     | 0.81 |
|                         | putative me   | 0.87 | 0.14 | 1 | 0.76 | 0.23     | 1     | 0.83 |
|                         | putative tra  | 0.92 | 0.2  | 1 | 0.72 | 0.05     | 1     | 0.75 |
| ruvA                    | Holliday jur  | 0.95 | 0.09 | 1 | 0.84 | 0.11     | 1     | 0.83 |
| purE                    | phosphorib    | 0.99 | 0.11 | 1 | 0.96 | 0.12     | 1     | 0.82 |
|                         | putative tet  | 0.93 | 0.17 | 1 | 0.89 | 0.15     | 1     | 0.89 |

|                   |               |      |      |   |      |      |     |      |
|-------------------|---------------|------|------|---|------|------|-----|------|
|                   | conserved     | 1.09 | 0.16 | 1 | 0.73 | 0.07 | 1   | 0.82 |
|                   | hypothetica   | 0.9  | 0.11 | 1 | 0.66 | 0.15 | 1   | 0.84 |
|                   | putative rtn  | 0.95 | 0.12 | 1 | 0.96 | 0.24 | 1   | 0.89 |
|                   | conserved     | 0.97 | 0.18 | 1 | 0.82 | 0.2  | 1   | 0.72 |
|                   | putative be   | 1.03 | 0.1  | 1 | 0.68 | 0.12 | 1   | 0.76 |
| se protein        |               | 0.26 | 0.12 | 1 | 0.81 | 0.21 | 1   | n/a  |
| ruvC              | crossover j   | 0.93 | 0.08 | 1 | 1    | 0.21 | 1   | 0.93 |
| dsdA              | D-serine de   | 0.96 | 0.11 | 1 | 1.39 | 0.31 | 1   | 1.32 |
|                   | conserved     | 1    | 0.08 | 1 | 0.98 | 0.15 | 1   | 1.07 |
|                   |               | 0.43 | 0.11 | 1 | 0.89 | 0.14 | 1   | n/a  |
| tein, gntR family |               | 0.13 | 0.02 | 1 | 1.04 | 0.18 | 1   | n/a  |
|                   | possible hy   | 0.95 | 0.13 | 1 | 1.03 | 0.1  | 1   | 1.3  |
| rhIB              | putative AT   | 0.89 | 0.13 | 1 | 1.41 | 0.2  | 1   | 1.37 |
| xylA              | D-xylose is   | 1.05 | 0.1  | 1 | 1.27 | 0.12 | 1   | 1.24 |
|                   | conserved     | 1.04 | 0.13 | 1 | 0.89 | 0.1  | 1   | 0.77 |
|                   | conserved     | 0.88 | 0.08 | 1 | 1.14 | 3.5  | 1   | 1.17 |
|                   | conserved     | 1.01 | 0.1  | 1 | 1    | 0.12 | 1   | 1.03 |
| gcvP              | glycine deh   | 0.82 | 0.14 | 1 | 1.03 | 0.12 | 1   | 1.2  |
| ansB              | L-asparagi    | 1.04 | 0.11 | 1 | 1.2  | 0.27 | 1   | 1.19 |
| murl              | glutamate i   | 1.1  | 0.15 | 1 | 1.3  | 0.1  | 1   | 1.22 |
|                   | conserved     | 1.01 | 0.17 | 1 | 1.03 | 0.22 | 1   | 1.14 |
| citT              | citrate carri | 0.97 | 0.07 | 1 | 0.88 | 0.11 | 1   | 0.76 |
| yeiP              |               | 1.06 | 0.15 | 1 | 0.77 | 0.2  | n/a | 0.94 |
|                   | putative tra  | 1.03 | 0.08 | 1 | 1.02 | 0.2  | 1   | 1.14 |
| pspF              | psp operon    | 1.02 | 0.14 | 1 | 0.8  | 0.13 | 1   | 0.77 |
|                   | probable is   | 1.08 | 0.09 | 1 | 1.01 | 0.21 | 1   | 1.34 |
|                   | RhtC-like tr  | 1.05 | 0.09 | 1 | 1    | 0.1  | 1   | 0.92 |
| yafP              | putative ac   | 1.05 | 0.14 | 1 | 1.2  | 0.33 | 1   | 1.45 |
| yeiH              | putative me   | 1.12 | 0.08 | 1 | 0.93 | 0.09 | 1   | 0.86 |
| ne protein        |               | 0.36 | 0.08 | 1 | 0.87 | 0.18 | 1   | n/a  |
| yehU              | putative tw   | 0.96 | 0.12 | 1 | 0.78 | 0.05 | 1   | 0.89 |
| yeiG              | putative es   | 1.06 | 0.16 | 1 | 0.97 | 0.73 | 1   | 0.94 |
| wcal              | putative gly  | 1.09 | 0.11 | 1 | 0.94 | 0.06 | 1   | 0.87 |
| yehY              | putative pe   | 0.92 | 0.1  | 1 | 0.88 | 0.11 | 1   | 0.71 |
| lctD              | putative L-l  | 0.94 | 0.11 | 1 | 1.3  | 0.23 | 1   | 1.33 |
| rplC              | 50S riboso    | 1    | 0.11 | 1 | 1.2  | 0.22 | 1   | 1.3  |
| amiB              | N-acetylm     | 1    | 0.12 | 1 | 1.25 | 0.27 | 1   | 1.11 |
| rplP              | 50S riboso    | 0.99 | 0.12 | 1 | 1.15 | 0.16 | 1   | 1.52 |
|                   | possible lip  | 1.18 | 0.09 | 1 | 1.04 | 0.12 | 1   | 1.12 |
| yjFP              | conserved     | 1.03 | 0.1  | 1 | 1.15 | 0.09 | 1   | 1.17 |
|                   | conserved     | 0.96 | 0.18 | 1 | 1.13 | 0.14 | 1   | 1.23 |
| yjeK              | conserved     | 0.9  | 0.07 | 1 | 1.06 | 0.22 | 1   | 1.34 |
| yehR              | putative lip  | 1.1  | 0.13 | 1 | 0.78 | 0.11 | 1   | 0.92 |
| Int               | apolipoprot   | 0.93 | 0.11 | 1 | 1    | 0.23 | 1   | 0.85 |
|                   | conserved     | 0.95 | 0.14 | 1 | 1.05 | 0.18 | 1   | 1.26 |
| helD              | helicase IV   | 1.06 | 0.08 | 1 | 0.79 | 0.06 | 1   | 0.76 |
| modA              | molybdate-    | 1.02 | 0.15 | 1 | 0.87 | 0.1  | 1   | 0.82 |
| yliB              | putative AE   | 0.97 | 0.11 | 1 | 0.88 | 0.09 | 1   | 0.84 |
|                   | conserved     | 1.11 | 0.11 | 1 | 1.21 | 0.12 | 1   | 1.29 |
| ybhC              | possible pe   | 0.99 | 0.1  | 1 | 0.99 | 0.19 | 1   | 0.77 |
| ybiN              |               | 0.96 | 0.08 | 1 | 0.96 | 0.08 | 1   | 0.75 |
| gcvH              | glycine clea  | 1.06 | 0.16 | 1 | 1.05 | 0.13 | 1   | 1.29 |

|                           |              |      |      |     |      |      |     |      |
|---------------------------|--------------|------|------|-----|------|------|-----|------|
| rnhA                      | ribonucleas  | 1.02 | 0.09 | 1   | 1.09 | 0.17 | 1   | 0.98 |
|                           | possible ox  | 1.02 | 0.07 | 1   | 1.12 | 0.13 | 1   | 1.34 |
| sseA                      | putative pa  | 1.09 | 0.08 | 1   | 0.76 | 0.14 | 1   | 0.83 |
| ybiH                      | hypothetica  | 1.07 | 0.08 | 1   | 0.85 | 0.16 | 1   | 0.81 |
| mdfA                      | multidrug tr | 1.05 | 0.12 | 1   | 0.84 | 0.06 | 1   | 0.73 |
|                           | conserved    | 1.19 | 0.11 | 1   | 1.06 | 0.23 | 1   | 0.88 |
| rotein                    |              | 1.11 | 0.11 | 1   | 0.95 | 0.09 | 1   | n/a  |
| rotein                    |              | 0.12 | 0.03 | 1   | 1.11 | 0.04 | 1   | n/a  |
|                           | hypothetica  | 1.06 | 0.1  | 1   | 1.03 | 0.14 | 1   | 1.02 |
|                           | Putative ac  | 1.59 | 0.22 | 0   | 1.13 | 0.23 | 0   | 1.11 |
| ate protein               |              | 0.12 | 0.03 | 1   | 1.18 | 0.16 | 1   | n/a  |
|                           | putative ex  | 1.03 | 0.1  | 1   | 1.13 | 0.19 | 1   | 1.25 |
| ne protein                |              | 0.15 | 0.04 | 1   | 1.14 | 0.2  | 1   | n/a  |
| yjaB                      | putative ac  | 1.07 | 0.15 | 1   | 1.2  | 0.15 | 1   | 1.26 |
| cobT                      | nicotinate-r | 1.05 | 0.19 | 1   | 0.76 | 0.08 | 1   | 0.72 |
| rotein                    |              | 0.09 | 0.01 | 1   | 1.01 | 0.08 | 1   | n/a  |
| thetical protein          |              | 0.46 | 0.12 | 1   | 1.07 | 0.16 | 1   | n/a  |
| apl                       | phage regu   | 1.02 | 0.11 | 1   | 1    | 0.05 | 1   | 1.22 |
| rpsO                      | 30S riboso   | 0.94 | 0.2  | 1   | 1.11 | 0.15 | 1   | 1.39 |
|                           | conserved    | 1.11 | 0.09 | 1   | 1.01 | 0.13 | 1   | 1.21 |
| gatB                      | PTS syste    | 1.01 | 0.13 | 1   | 1.06 | 0.11 | 1   | 1.2  |
|                           | putative me  | 1.06 | 0.08 | 1   | 0.7  | 0.14 | 1   | 0.77 |
| hyaE2                     | hydrogena    | 1.02 | 0.17 | 1   | 0.63 | 0.03 | 1   | 0.68 |
| rimL                      | ribosomal-p  | 1.03 | 0.12 | 1   | 0.72 | 0.09 | 1   | 0.75 |
| yhdV                      | possible lip | 1.01 | 0.12 | 1   | 1.13 | 0.17 | 1   | 1.29 |
| fixX                      | ferredoxin l | 0.93 | 0.14 | 1   | 1.06 | 0.12 | 1   | 0.98 |
|                           |              | 1.18 | 0.13 | 1   | 0.61 | 0.12 | 1   | 0.57 |
| glnB                      | nitrogen re  | 1.02 | 0.14 | 1   | 1    | 0.11 | 1   | 1.06 |
|                           |              | 0.57 | 0.13 | 1   | 0.8  | 0.08 | n/a | 0.91 |
|                           | putative me  | 1.08 | 0.13 | 1   | 0.89 | 0.21 | 1   | 1.02 |
| rotein                    |              | 1.09 | 0.12 | 1   | 0.9  | 0.1  | 1   | n/a  |
|                           | putative ars | 0.99 | 0.1  | 1   | 0.8  | 0.2  | 1   | 0.97 |
| fdx                       | ferredoxin   | 1.06 | 0.14 | 1   | 1.07 | 0.17 | 1   | 1.09 |
|                           |              | 1.13 | 0.18 | 1   | 0.94 | 0.17 | 1   | 0.81 |
| ybeD                      | conserved    | 1.04 | 0.12 | 1   | 1    | 0.04 | 1   | 0.9  |
|                           | putative me  | 1    | 0.07 | 1   | 0.91 | 0.12 | 1   | 0.86 |
| il protein                |              | 0.04 | 0    | 1   | 0.66 | 0.07 | n/a | n/a  |
| rotein                    |              | 0.04 | 0.01 | 1   | 0.64 | 0.15 | n/a | n/a  |
| ein                       |              | 0.02 | 0.01 | 1   | 0.71 | 0.09 | n/a | n/a  |
| latory proteins, luxR far |              | 0.37 | 0.03 | 1   | 0.72 | 0.1  | n/a | 1.21 |
|                           | putative ou  | 0.32 | 0.08 | 1   | 0.63 | 0.19 | n/a | 0.9  |
| riae; regulatory          |              | 0.2  | 0.03 | 1   | 0.68 | 0.1  | n/a | n/a  |
| rotein                    |              | 0.14 | 0.02 | 1   | 0.68 | 0.14 | n/a | n/a  |
| ining region              |              | 0.16 | 0.12 | 1   | 1.3  | 1.56 | n/a | n/a  |
|                           |              | n/a  | n/a  | n/a | n/a  | n/a  | n/a | n/a  |
|                           |              | 0.14 | 0.04 | 1   | 1.04 | 0.06 | n/a | n/a  |
|                           |              | 1.03 | 0.16 | 1   | 0.97 | 0.18 | n/a | 0.9  |
|                           |              | 1.05 | 0.09 | 1   | 0.94 | 0.14 | n/a | 0.91 |
|                           |              | 1.01 | 0.13 | 1   | 0.99 | 0.1  | n/a | 0.87 |
|                           |              | 1.08 | 0.25 | 1   | 1.19 | 0.25 | n/a | 1.03 |
|                           |              | 1.11 | 0.12 | 1   | 0.91 | 0.06 | n/a | 0.71 |
|                           | putative ex  | 1.09 | 0.08 | 1   | 0.81 | 0.12 | n/a | 0.69 |



|      |              |       |       |   |      |      |     |      |
|------|--------------|-------|-------|---|------|------|-----|------|
|      | hypothetica  | 15.97 | 1.34  | 1 | n/a  | n/a  | n/a | 0.7  |
|      | putative m   | 9.69  | 3.71  | 1 | n/a  | n/a  | n/a | 0.7  |
|      | hypothetica  | 11.06 | 4.3   | 1 | n/a  | n/a  | n/a | 0.68 |
|      | hypothetica  | 1.22  | 0.25  | 1 | 1.34 | 0.22 | n/a | 0.9  |
|      | putative ba  | 17.14 | 10.99 | 1 | n/a  | n/a  | n/a | 0.74 |
|      | hypothetica  | 12.31 | 2     | 1 | n/a  | n/a  | n/a | 0.75 |
|      | conserved    | 9.69  | 2.92  | 1 | n/a  | n/a  | n/a | 0.67 |
|      | DNA-invert   | 5.32  | 2.1   | 1 | n/a  | n/a  | n/a | 0.74 |
|      | putative ba  | 15.86 | 3.07  | 1 | n/a  | n/a  | n/a | 0.69 |
|      | conserved    | 18.15 | 5.89  | 1 | n/a  | n/a  | n/a | 0.8  |
| hokW | Similar to c | 3.37  | 1.07  | 1 | n/a  | n/a  | n/a | 0.96 |
|      | hypothetica  | 19.39 | 8.82  | 1 | n/a  | n/a  | n/a | 0.69 |
|      | putative ba  | 14.62 | 7.77  | 1 | n/a  | n/a  | n/a | 0.68 |
|      | conserved    | 9.35  | 4.47  | 1 | n/a  | n/a  | n/a | 0.8  |
|      | hypothetica  | 13.35 | 4.32  | 1 | n/a  | n/a  | n/a | 0.73 |
|      | putative ba  | 4.6   | 0.95  | 1 | n/a  | n/a  | n/a | 0.8  |
|      | conserved    | 12.64 | 2.99  | 1 | n/a  | n/a  | n/a | 0.83 |
|      | putative ba  | 14.79 | 1.65  | 1 | n/a  | n/a  | n/a | 0.63 |
|      | putative pe  | 6.12  | 1.96  | 1 | n/a  | n/a  | n/a | 0.81 |
|      | putative ba  | 16.56 | 3.08  | 1 | n/a  | n/a  | n/a | 0.76 |
|      | possible se  | 12.51 | 1.56  | 1 | n/a  | n/a  | n/a | 1.07 |
|      | putative re  | 15.5  | 2.85  | 1 | n/a  | n/a  | n/a | 0.89 |
| rfbV | putative gly | 7.5   | 5.52  | 1 | n/a  | n/a  | n/a | 0.91 |
|      | hypothetica  | 10.71 | 2.25  | 1 | n/a  | n/a  | n/a | 1.17 |
|      | hypothetica  | 7.11  | 2.14  | 1 | n/a  | n/a  | n/a | 1.16 |
| vexD | Vi polysacc  | 20.13 | 4.87  | 1 | n/a  | n/a  | n/a | 1.07 |
|      | putative m   | 26.71 | 5.26  | 1 | n/a  | n/a  | n/a | 1.2  |
|      | hypothetica  | 13.81 | 3.34  | 1 | n/a  | n/a  | n/a | 1.16 |
|      | hypothetica  | 13.89 | 3.25  | 1 | n/a  | n/a  | n/a | 1.3  |
|      | bacterioph   | 8.65  | 1.07  | 1 | n/a  | n/a  | n/a | 1.14 |
|      | conserved    | 23.31 | 12.43 | 1 | n/a  | n/a  | n/a | 1.03 |
|      | putative m   | 1.78  | 0.18  | 1 | 0.95 | 0.08 | n/a | 1.1  |
|      | hypothetica  | 31.2  | 8.89  | 1 | n/a  | n/a  | n/a | 1.02 |
| rci  | shufflon-sp  | 17.74 | 6.82  | 1 | n/a  | n/a  | n/a | 1.12 |
|      | putative ph  | 16.73 | 4.59  | 1 | n/a  | n/a  | n/a | 1.09 |
| prfB | peptide cha  | 1.1   | 0.11  | 1 | 1.08 | 0.13 | n/a | 1.29 |
| pgtB | phosphogly   | 1.35  | 0.31  | 0 | 1.4  | 0.55 | 0   | 1.06 |
| cbiF | precorrin-4  | 1.16  | 0.12  | 1 | 0.79 | 0.18 | 1   | 0.91 |
|      | methyl-acc   | 0.98  | 0.13  | 1 | 1.13 | 0.17 | 1   | 1.37 |
| murE | UDP-N-ace    | 0.93  | 0.09  | 1 | 0.99 | 0.07 | 1   | 1.01 |
| acnB | aconitate h  | 1     | 0.07  | 1 | 1.07 | 0.14 | 1   | 1.02 |
|      | putative gl  | 0.94  | 0.07  | 1 | 0.96 | 0.15 | 1   | 1    |
|      |              | 0.19  | 0.1   | 1 | 1.08 | 0.14 | 1   | n/a  |
| fhuD | ferrichrome  | 0.94  | 0.06  | 1 | 1.02 | 0.28 | 1   | 0.93 |
| ldcC | lysine deca  | 0.93  | 0.09  | 1 | 1.17 | 0.82 | 1   | 1    |
|      | conserved    | 1.09  | 0.07  | 1 | 0.9  | 0.23 | 0   | 0.79 |
|      |              | 0.2   | 0.09  | 1 | 1.34 | 0.36 | 0   | n/a  |
| seqA | seqA prote   | 1     | 0.09  | 1 | 1.08 | 0.28 | 1   | 0.9  |
| yedE | putative m   | 1     | 0.14  | 1 | 0.82 | 0.16 | 1   | 0.74 |
| waaF | ADP-hepto    | 0.76  | 0.05  | 1 | 1.23 | 0.14 | 1   | 1.32 |
| cbiL | precorrin-2  | 1.04  | 0.08  | 1 | 0.84 | 0.11 | 1   | 0.85 |
| trpC | indole-3-gly | 1.02  | 0.06  | 1 | 1.07 | 0.41 | 0   | 0.78 |

|                         |              |      |      |   |      |      |     |      |
|-------------------------|--------------|------|------|---|------|------|-----|------|
|                         | probable se  | 1.04 | 0.1  | 1 | 1.26 | 0.22 | 1   | 1    |
| phoU                    | phosphate    | 0.99 | 0.13 | 1 | 0.95 | 0.17 | 1   | 0.92 |
|                         | putative ph  | 1    | 0.2  | 1 | 1    | 0.29 | 1   | 1.23 |
| mutY                    | A/G-specifi  | 1.01 | 0.15 | 1 | 1.15 | 0.4  | 1   | 1.33 |
|                         | putative me  | 0.95 | 0.15 | 1 | 1.12 | 0.17 | 0   | 1.25 |
|                         | conserved    | 1.05 | 0.15 | 1 | 1.17 | 0.13 | 1   | 1.47 |
| tatE                    | sec-indepe   | 1.07 | 0.08 | 1 | 0.84 | 0.16 | 1   | 0.8  |
| rotein                  |              | 0.93 | 0.14 | 0 | 1.05 | 1.88 | 0   | n/a  |
|                         | putative lip | 1.09 | 0.11 | 1 | 1.18 | 0.47 | 0   | 0.7  |
| hslR                    | heat shock   | 0.94 | 0.03 | 1 | 1.22 | 0.18 | 0   | 1.24 |
| pendent regulator of rt |              | 0.11 | 0.07 | 1 | 1.15 | 0.16 | 1   | n/a  |
|                         | conserved    | 0.92 | 0.05 | 1 | 1.24 | 0.16 | 1   | 1.25 |
| mdoB                    | putative ph  | 0.96 | 0.1  | 1 | 1.1  | 0.29 | 1   | 1.23 |
| fhuE                    |              | 0.94 | 0.08 | 1 | 1.05 | 0.4  | 1   | 0.85 |
| ne protein              |              | 0.16 | 0.04 | 1 | 1.21 | 0.22 | 1   | n/a  |
| ine protein             |              | 0.91 | 0.16 | 1 | 1.12 | 0.31 | 1   | 1.26 |
|                         | putative me  | 1    | 0.11 | 1 | 0.94 | 0.19 | 1   | 1.09 |
| gpmB                    | probable pl  | 1    | 0.13 | 1 | 1.12 | 0.12 | 1   | 1.11 |
| rotein                  |              | 0.42 | 0.06 | 0 | 1.35 | 0.39 | 0   | n/a  |
|                         | heavy meta   | 0.98 | 0.08 | 1 | 1.33 | 3.04 | 1   | 1.35 |
| protein                 |              | 0.1  | 0.03 | 1 | 0.99 | 0.11 | 1   | n/a  |
| thetical protein        |              | 0.32 | 0.06 | 1 | 1.14 | 0.21 | 1   | n/a  |
| rotein                  |              | 0.25 | 0.27 | 1 | 1.4  | 0.4  | 0   | n/a  |
|                         |              | 0.14 | 0.07 | 1 | 1.06 | 0.1  | 1   | n/a  |
|                         | putative me  | 1.03 | 0.07 | 1 | 1.02 | 0.13 | 1   | 1.25 |
| yjbO                    | putative me  | 1.01 | 0.16 | 1 | 1.08 | 0.27 | 1   | 1.23 |
| adiY                    | putative Ar  | 0.93 | 0.14 | 1 | 0.99 | 0.15 | 1   | 1.13 |
|                         | putative me  | 0.99 | 0.05 | 1 | 0.96 | 0.15 | 1   | 0.82 |
|                         |              | 0.35 | 0.24 | 0 | 1.02 | 0.33 | 0   | n/a  |
| yffH                    | conserved    | 0.99 | 0.14 | 1 | 0.91 | 0.32 | 1   | 1.09 |
| rotein                  |              | 0.32 | 0.1  | 1 | 0.84 | 0.11 | 0   | n/a  |
| amiA                    | probable N   | 0.96 | 0.08 | 1 | 1.06 | 0.22 | 1   | 1.03 |
| hcr                     | NADH oxid    | 0.9  | 0.06 | 1 | 1.05 | 0.32 | 1   | 0.76 |
| ycaM                    | probable tr  | 0.94 | 0.03 | 1 | 0.72 | 0.12 | 1   | 0.78 |
| mukB                    | cell divisor | 0.9  | 0.05 | 1 | 0.94 | 0.42 | 1   | 0.79 |
| able minor tail protein |              | 0.07 | 0.04 | 1 | 0.81 | 0.07 | n/a | n/a  |
| ftsN                    | cell divisor | 0.86 | 0.11 | 1 | 1.24 | 0.08 | 1   | 1.48 |
| rotein                  |              | 0.31 | 0.12 | 1 | 1.08 | 0.18 | 1   | n/a  |
| frdA                    | fumarate re  | 1.05 | 0.15 | 1 | 1.17 | 0.09 | 1   | 1.24 |
| xapR                    | xanthosine   | 1.09 | 0.16 | 1 | 0.92 | 0.28 | 1   | 1.01 |
| ive minor tail protein  |              | 0.08 | 0.02 | 1 | 0.79 | 0.09 | 1   | n/a  |
| sseA                    | putative thi | 0.88 | 0.09 | 1 | 1.04 | 0.11 | 1   | 1.03 |
| yfhB                    | putative me  | 0.98 | 0.14 | 1 | 1.19 | 0.93 | 0   | 0.96 |
|                         | putative tra | 0.98 | 0.09 | 1 | 1.03 | 0.17 | 1   | 0.99 |
| yjeQ                    | putative me  | 0.96 | 0.17 | 1 | 1.17 | 0.22 | 1   | 1.28 |
| amn                     | AMP nucle    | 0.89 | 0.08 | 1 | 0.91 | 0.18 | 1   | 0.9  |
| nuoN                    | NADH deh     | 0.98 | 0.87 | 1 | 0.91 | 0.18 | 1   | 0.9  |
|                         | putative an  | 1.01 | 0.05 | 1 | 0.87 | 0.21 | 1   | 1.09 |
| pabC                    | 4-amino-4-   | 1.09 | 0.12 | 1 | 0.92 | 0.17 | 1   | 0.76 |
| pduV                    | putative pro | 0.82 | 0.1  | 1 | 1.16 | 0.28 | 0   | 0.95 |
| n factor EF-Tu (duplica |              | 0.97 | 0.05 | 1 | 1.12 | 0.24 | n/a | 1.34 |
|                         | putative req | 0.99 | 0.1  | 1 | 0.64 | 0.31 | 1   | 0.75 |

|                         |               |      |      |   |      |      |     |      |
|-------------------------|---------------|------|------|---|------|------|-----|------|
| sinR                    | LysR-family   | 1.02 | 0.09 | 1 | 1.02 | 0.21 | 0   | 1.09 |
|                         | putative me   | 0.92 | 0.11 | 1 | 0.69 | 0.1  | 1   | 0.82 |
| fkIB                    | probable Fl   | 1    | 0.1  | 1 | 1.01 | 0.16 | 1   | 1.31 |
| leuO                    | probable ar   | 1.05 | 0.07 | 1 | 1.17 | 0.16 | 1   | 1.07 |
|                         | hypothetica   | 0.93 | 0.12 | 1 | 1.02 | 0.4  | 0   | 1.04 |
| in amino acid transport |               | 0.17 | 0.05 | 1 | 0.71 | 0.77 | 1   | n/a  |
| rotein                  |               | 0.16 | 0.03 | 1 | 1.03 | 0.13 | 1   | n/a  |
|                         | putative hy   | 0.9  | 0.12 | 1 | 0.78 | 0.12 | 1   | 0.94 |
|                         | putative tra  | 1.03 | 0.2  | 1 | 0.96 | 0.72 | 1   | 0.94 |
|                         | putative me   | 1    | 0.11 | 1 | 1.18 | 0.16 | 1   | 1.1  |
| red in DNA repair       |               | 0.06 | 0.02 | 1 | 1.04 | 0.18 | 1   | n/a  |
|                         | putative an   | 1.03 | 0.07 | 1 | 0.89 | 0.16 | 1   | 0.99 |
|                         | conserved     | 1.07 | 0.12 | 1 | 1.21 | 0.45 | 0   | 0.88 |
| nlpC                    | putative lipi | 1.05 | 0.07 | 1 | 0.79 | 0.3  | 1   | 0.86 |
|                         | hypothetica   | 0.96 | 0.07 | 1 | 1.01 | 0.34 | 0   | 0.74 |
| safC                    | outer-mem     | 0.99 | 0.03 | 1 | 0.95 | 0.12 | 1   | 0.9  |
| accA                    | acetyl-coer   | 0.91 | 0.06 | 1 | 1.01 | 0.2  | 1   | 0.95 |
| cyoA                    | cytochrome    | 1.1  | 0.07 | 1 | 1.02 | 0.21 | 1   | 0.91 |
| aceF                    | dihydrolipo   | 0.92 | 0.05 | 1 | 1.05 | 0.17 | 1   | 0.99 |
|                         | conserved     | 1.14 | 0.07 | 1 | 0.87 | 0.24 | 1   | 0.89 |
| ansport protein         |               | 0.07 | 0.04 | 1 | 0.73 | 0.19 | 1   | n/a  |
| mig-14                  | putative tra  | 1.08 | 0.14 | 1 | 0.87 | 0.66 | 1   | 1.14 |
|                         | putative me   | 1.06 | 0.16 | 1 | 0.96 | 0.84 | 0   | 0.88 |
|                         | putative me   | 1.03 | 0.13 | 1 | 0.61 | 0.16 | 1   | 0.78 |
| malE                    | periplasmic   | 1.04 | 0.11 | 1 | 1.17 | 0.16 | 1   | 1.41 |
|                         | possible ou   | 1.09 | 0.12 | 1 | 0.88 | 0.15 | 1   | 1.08 |
| yaiW                    | putative lipi | 1.04 | 0.13 | 1 | 0.97 | 0.08 | 1   | 1.01 |
| secD                    | protein-exp   | 1    | 0.14 | 1 | 1.08 | 0.23 | 1   | 1.08 |
| murF                    | UDP-N-ace     | 0.92 | 0.05 | 1 | 1.08 | 0.18 | 1   | 1    |
| cvpA                    | colicin V pr  | 1.11 | 0.09 | 1 | 1.01 | 0.23 | 1   | 1.06 |
| tctD                    | transcriptio  | 0.89 | 0.03 | 1 | 0.91 | 0.17 | 1   | 1.14 |
|                         | conserved     | 1.02 | 0.04 | 1 | 0.74 | 0.16 | 1   | 0.83 |
| livG                    | high-affinity | 1.07 | 0.08 | 1 | 1.14 | 0.17 | 1   | 1.28 |
| mdlB                    | putative AE   | 0.97 | 0.03 | 1 | 1.02 | 0.21 | 1   | 0.91 |
| pheP                    | phenylalan    | 1.02 | 0.08 | 1 | 0.87 | 0.13 | 1   | 0.88 |
|                         | conserved     | 0.95 | 0.1  | 1 | 0.7  | 0.08 | n/a | 0.95 |
|                         | putative su   | 1.05 | 0.05 | 1 | 1.01 | 0.11 | 1   | 1.14 |
| yfiK                    | putative me   | 0.94 | 0.05 | 1 | 0.86 | 0.09 | 1   | 0.99 |
| yhjY                    | putative me   | 0.86 | 0.08 | 1 | 1.26 | 0.14 | 1   | 1.35 |
| yhbV                    | conserved     | 1.01 | 0.05 | 1 | 1.12 | 0.14 | 1   | 1.45 |
|                         | putative tra  | 1.09 | 0.1  | 1 | 0.85 | 0.24 | 1   | 0.95 |
| yfhE                    | chaperone     | 1.13 | 0.1  | 1 | 1    | 0.23 | 1   | 1.09 |
| bcfG                    | fimbrial cha  | 1.06 | 0.06 | 1 | 1.07 | 0.25 | 1   | 1.21 |
| fbp                     | fructose-1,6  | 1.01 | 0.34 | 1 | 1.13 | 0.11 | 1   | 1.21 |
| dnaC                    | probable D    | 0.93 | 0.12 | 1 | 1.19 | 0.09 | 1   | 1.21 |
|                         |               | 0.13 | 0.08 | 1 | 1.09 | 0.19 | 1   | n/a  |
|                         | ferric iron r | 0.98 | 0.16 | 1 | 1.03 | 0.15 | 1   | 1.22 |
| kbl                     | 2-amino-3-    | 0.95 | 0.04 | 1 | 1.31 | 0.2  | 1   | 1.41 |
| yhjQ                    | conserved     | 0.94 | 0.07 | 1 | 1.31 | 0.34 | 1   | 1.23 |
|                         | conserved     | 0.93 | 0.1  | 1 | 1.06 | 0.16 | 1   | 1.27 |
| glpQ                    | glycerophos   | 0.86 | 0.11 | 1 | 0.85 | 0.09 | 1   | 0.95 |
| nrdA                    | ribonucleos   | 0.96 | 0.06 | 1 | 1.12 | 0.26 | 1   | 1.01 |

|             |               |      |      |   |      |          |       |      |
|-------------|---------------|------|------|---|------|----------|-------|------|
| spal        | secretory a   | 0.95 | 0.06 | 1 | 1.07 | 0.2      | 1     | 1.12 |
| yiiR        | putative me   | 1.22 | 0.1  | 1 | 1.25 | 0.11     | 1     | 1.22 |
|             | possible 5-   | 0.97 | 0.06 | 1 | 1.02 | 0.17     | 1     | 0.93 |
| sucB        | dihydrolipo.  | 0.93 | 0.08 | 1 | 0.97 | 0.16     | 1     | 0.87 |
| glnG        | Two-compr     | 0.9  | 0.05 | 1 | 1.27 | 0.19     | 1     | 1.43 |
| pabA        | para-aminc    | 1.04 | 0.09 | 1 | 0.96 | 0.19     | 1     | 1.18 |
| polA        | DNA polym     | 1.13 | 0.11 | 1 | 1.17 | 0.36     | 1     | 1.38 |
|             | conserved     | 1.01 | 0.13 | 1 | 0.98 | 0.22     | 1     | 0.91 |
| yheS        | probable A    | 1.01 | 0.04 | 1 | 1.17 | 0.16     | 1     | 1.22 |
| soxS        | regulatory p  | 1.18 | 0.14 | 1 | 1.24 | 0.2      | 1     | 1.26 |
| recO        | DNA repair    | 0.98 | 0.14 | 1 | 1.11 | 0.2      | 1     | 1.06 |
| opdB        | oligopeptid   | 0.98 | 0.08 | 1 | 0.73 | 0.07     | 1     | 0.93 |
|             | possible ex   | 0.9  | 0.16 | 1 | 1.25 | 0.22     | 1     | 1.17 |
|             | conserved     | 1.04 | 0.11 | 1 | 1.2  | 0.18     | 1     | 1.59 |
| ydhE        | hypothetica   | 1.03 | 0.1  | 1 | 0.82 | 0.19     | 1     | 0.78 |
|             | putative an   | 0.48 | 0.07 | 1 | 1.09 | 0.19     | 1     | 1.06 |
| tnpA        | transposas    | 2.24 | 0.37 | 1 | 0.84 | 0.07 n/a |       | 0.9  |
| yfiH        | conserved     | 1.05 | 0.03 | 1 | 0.98 | 0.23     | 1     | 1.04 |
| yaaF        | putative nu   | 0.97 | 0.04 | 1 | 0.99 | 0.06     | 1     | 1.11 |
|             |               | 0.49 | 0.07 | 1 | 0.88 | 0.21 n/a |       | 0.85 |
|             | hypothetica   | 0.85 | 0.16 | 0 | 1.54 | 1.14     | 0     | 0.71 |
|             | endonuclea    | 1.07 | 0.06 | 1 | 1.27 | 0.61     | 0     | 1.28 |
|             |               | 0.22 | 0.04 | 1 | 1.11 | 0.47     | 1     | 0.75 |
|             | hypothetica   | 0.93 | 0.19 | 0 | 1.42 | 0.37     | 0     | 1    |
| pduP        | putative Cc   | 0.91 | 0.11 | 1 | 0.73 | 0.07     | 1     | 0.87 |
| nrfD        | cytochrome    | 0.92 | 0.11 | 1 | 1.18 | 0.05     | 1     | 1.04 |
|             | conserved     | 1.05 | 0.14 | 1 | 0.84 | 0.09     | 1     | 0.9  |
|             | putative int  | 0.91 | 0.2  | 0 | 1.22 | 0.21     | 0     | 1.16 |
| yaaH        | conserved     | 1.06 | 0.09 | 1 | 1.03 | 0.11     | 1     | 1.09 |
| ar to genes | in phage ph   | 0.54 | 0.13 | 1 | 1.03 | 0.06     | 1 n/a |      |
| nhaR        | transcriptio  | 1    | 0.09 | 1 | 1.08 | 0.04     | 1     | 1.1  |
|             | lipopolysac   | 0.98 | 0.13 | 1 | 1.32 | 0.11     | 1     | 1.26 |
| yigL        | conserved     | 0.97 | 0.02 | 1 | 1.4  | 0.22     | 1     | 1.3  |
| hemD        | uroporphyr    | 1.01 | 0.04 | 1 | 1.4  | 0.17     | 1     | 1.28 |
| epd         | D-erythroε    | 0.96 | 0.08 | 1 | 1.19 | 0.17     | 1     | 1.07 |
|             | conserved     | 0.96 | 0.07 | 1 | 0.71 | 0.1      | 1     | 0.72 |
| hyaE        | hydrogenas    | 1.05 | 0.14 | 1 | 0.7  | 0.54 n/a |       | 0.96 |
| kduD        | 2-keto-3-de   | 0.85 | 0.06 | 1 | 1.03 | 0.15     | 1     | 1.09 |
|             | conserved     | 0.99 | 0.1  | 1 | 0.99 | 0.07     | 1     | 0.97 |
|             | conserved     | 0.98 | 0.1  | 1 | 1.25 | 0.33     | 1     | 1.19 |
|             | possible m    | 1.03 | 0.06 | 1 | 1.23 | 0.19     | 1     | 1.32 |
| ygdH        | conserved     | 0.95 | 0.15 | 1 | 1.02 | 0.1      | 1     | 1.2  |
|             | putative lip: | 1.04 | 0.08 | 1 | 1.23 | 0.26     | 1     | 1.36 |
| metE        | 5-methyltet   | 1.06 | 0.08 | 1 | 1.36 | 0.24     | 1     | 1.05 |
| xerC        | integrase/r   | 1.03 | 0.14 | 1 | 1.43 | 0.2      | 1     | 1.24 |
| wecB        | UDP-N-ace     | 0.97 | 0.09 | 1 | 1.23 | 0.21     | 1     | 1.26 |
| birA        | bifunctiona   | 0.93 | 0.12 | 1 | 1.17 | 0.28     | 1     | 1.22 |
| recC        | exonucleas    | 1.02 | 0.08 | 1 | 1.05 | 0.16     | 1     | 1.18 |
| oppF        | oligopeptid   | 1    | 0.08 | 1 | 0.7  | 0.08     | 1     | 0.67 |
| tpiA        | triosephosφ   | 1.01 | 0.05 | 1 | 1.33 | 0.14     | 1     | 1.4  |
| apt         | adenine ph    | 1.07 | 0.1  | 1 | 0.92 | 0.13     | 1     | 0.9  |
| ine protein |               | 0.19 | 0.04 | 1 | 1.02 | 0.1      | 1 n/a |      |

|                  |                                                 |      |      |   |      |      |     |      |
|------------------|-------------------------------------------------|------|------|---|------|------|-----|------|
| fepA             | ferrienterotoxin                                | 0.96 | 0.13 | 1 | 0.92 | 0.12 | 1   | 0.91 |
|                  | putative metal-binding protein                  | 1.02 | 0.03 | 1 | 0.77 | 0.11 | 1   | 0.86 |
|                  | conserved                                       | 1    | 0.07 | 1 | 0.99 | 0.15 | 1   | 0.87 |
|                  | putative regulator                              | 0.87 | 0.08 | 1 | 0.67 | 0.15 | 1   | 0.81 |
|                  | possible A <sup>+</sup> regulator, LysR family  | 1.04 | 0.08 | 1 | 0.64 | 0.1  | 1   | 0.8  |
|                  | conserved                                       | 0.14 | 0.02 | 1 | 0.79 | 0.1  | 1   | n/a  |
|                  | conserved                                       | 1    | 0.07 | 1 | 0.74 | 0.12 | 1   | 0.75 |
| cryptase         |                                                 | 1.1  | 0.08 | 1 | 0.76 | 0.31 | 1   | n/a  |
|                  | hypothetical                                    | 1    | 0.2  | 1 | 0.71 | 0.08 | 1   | 0.72 |
|                  | outer membrane protein                          | 1.17 | 0.12 | 1 | 0.88 | 0.12 | 1   | 0.85 |
|                  | putative transporter                            | 1.08 | 0.12 | 1 | 0.85 | 0.1  | 1   | 0.85 |
| cydC             | transport ATPase                                | 0.93 | 0.09 | 1 | 0.83 | 0.07 | 1   | 0.79 |
| citX             | conserved                                       | 0.68 | 0.12 | 1 | 1.01 | 0.11 | 1   | 0.8  |
| dsbG             | thiol:disulfide isomerase                       | 0.9  | 0.12 | 1 | 1.03 | 0.25 | 0   | 0.82 |
|                  | putative outer membrane protein                 | 1.07 | 0.06 | 1 | 0.67 | 0.1  | 1   | 0.81 |
|                  |                                                 | 1.11 | 0.07 | 1 | 0.66 | 0.11 | 1   | 0.7  |
|                  | putative export protein                         | 0.92 | 0.06 | 1 | 0.65 | 0.14 | 1   | 0.82 |
| dbpA             |                                                 | 0.98 | 0.09 | 1 | 0.76 | 0.12 | 1   | 0.76 |
|                  | putative ATPase                                 | 0.88 | 0.08 | 1 | 0.72 | 0.04 | 1   | 0.79 |
| ygcA             | putative RNA polymerase                         | 0.99 | 0.06 | 1 | 1.02 | 0.14 | 1   | 1.17 |
|                  | putative metal-binding protein                  | 1.08 | 0.12 | 1 | 1.03 | 0.12 | 1   | 1.19 |
|                  | conserved                                       | 1.09 | 0.09 | 1 | 1.03 | 0.06 | 1   | 1.22 |
| pilT             | Type II secretion system                        | 0.82 | 0.07 | 1 | 1.23 | 0.05 | 1   | 1.17 |
| tig              | trigger factor                                  | 1.06 | 0.19 | 1 | 1.05 | 0.62 | 1   | 0.97 |
|                  | conserved                                       | 0.99 | 0.06 | 1 | 1.26 | 0.14 | 1   | 1.22 |
|                  | conserved                                       | 0.91 | 0.12 | 1 | 1.25 | 0.13 | 1   | 1.32 |
|                  | conserved                                       | 1.09 | 0.17 | 1 | 1.4  | 0.11 | 1   | 1.27 |
|                  | possible export protein                         | 1.06 | 0.09 | 1 | 1.1  | 0.1  | 1   | 1.47 |
| ygeA             | conserved                                       | 1.03 | 0.11 | 1 | 1.13 | 0.15 | 1   | 1.13 |
| acylttransferase |                                                 | 0.14 | 0.05 | 1 | 1.12 | 0.16 | 1   | n/a  |
| regulator        |                                                 | 0.14 | 0.03 | 1 | 1.13 | 0.16 | 1   | n/a  |
| dppC             | dipeptide transport protein                     | 1.06 | 0.18 | 1 | 1.2  | 0.08 | 1   | 1.13 |
| avtA             | valine--pyruvate aminotransferase               | 0.96 | 0.06 | 1 | 1.45 | 0.3  | 1   | 1.3  |
|                  | putative regulator                              | 0.99 | 0.08 | 1 | 1.28 | 0.18 | 1   | 1.3  |
| yicH             | putative export protein                         | 0.94 | 0.06 | 1 | 1.4  | 0.22 | 1   | 1.45 |
| res              |                                                 | 0.97 | 0.06 | 1 | 1.06 | 0.12 | 1   | 1    |
| hycA             | formate hydrogen lyase                          | 0.91 | 0.12 | 1 | 0.96 | 0.11 | 1   | 1.23 |
|                  | conserved                                       | 0.89 | 0.07 | 1 | 1.06 | 0.19 | 1   | 1.22 |
| hypB             | hydrogenase                                     | 0.91 | 0.04 | 1 | 1.08 | 0.08 | 1   | 1.01 |
| yohK             | putative nucleoside transferase                 | 0.9  | 0.04 | 1 | 0.84 | 0.09 | 1   | 0.78 |
| rfbM2            | mannose-1-phosphate transferase                 | 0.98 | 0.04 | 1 | 0.83 | 0.11 | 1   | 0.9  |
| dcd              | deoxycytidyl transferase                        | 0.98 | 0.06 | 1 | 0.78 | 0.11 | 1   | 0.87 |
| dsbE1            | thiol:disulfide isomerase                       | 0.99 | 0.06 | 1 | 1.16 | 0.15 | n/a | 1    |
| yejE             | putative biringer toxin                         | 1.05 | 0.12 | 1 | 0.89 | 0.08 | 1   | 0.78 |
|                  | putative general stress protein                 | 1.05 | 0.1  | 1 | 0.78 | 0.06 | 1   | 0.83 |
| htpX             | heat shock protein                              | 1.11 | 0.11 | 1 | 0.72 | 0.07 | 1   | 0.81 |
| rpsM             | 30S ribosomal protein                           | 1.11 | 0.1  | 1 | 1.23 | 0.27 | 1   | 1.48 |
| uspA             | universal stress protein                        | 1.04 | 0.15 | 1 | 1.23 | 0.17 | 1   | 1.36 |
| sspB             | stringent response protein                      | 1.06 | 0.13 | 1 | 1.1  | 0.11 | 1   | 1.38 |
| kdgK             | 2-dehydroquinate synthase                       | 1.08 | 0.08 | 1 | 1.27 | 0.11 | 1   | 1.25 |
| gntT             | high-affinity glucose-6-phosphate dehydrogenase | 0.95 | 0.08 | 1 | 1.13 | 0.06 | 1   | 1.21 |
| cysQ             | cysQ protease                                   | 1.04 | 0.08 | 1 | 1.14 | 0.1  | 1   | 1.11 |

|      |                         |      |      |   |      |      |     |      |
|------|-------------------------|------|------|---|------|------|-----|------|
|      | conserved               | 0.95 | 0.07 | 1 | 1.2  | 0.12 | 1   | 1.38 |
| srlR | glucitol ope            | 1    | 0.08 | 1 | 1.05 | 0.1  | 1   | 1.07 |
|      | putative ox             | 0.98 | 0.08 | 1 | 0.9  | 0.09 | 1   | 0.97 |
| yghB | DedA-famil              | 1.14 | 0.12 | 1 | 1.08 | 0.17 | 1   | 1.12 |
| ssal | putative pa             | 0.9  | 0.08 | 0 | 1.03 | 0.53 | 0   | 0.89 |
| sdhA | succinate c             | 0.99 | 0.39 | 1 | 0.92 | 0.11 | 1   | 0.87 |
|      | conserved               | 1.06 | 0.11 | 1 | 0.82 | 0.02 | 1   | 0.83 |
|      | ie (flavoproteins)      | 0.07 | 0.02 | 1 | 0.84 | 0.07 | 1   | n/a  |
| flgC | putative fla            | 1.11 | 0.13 | 1 | 0.72 | 0.09 | 1   | 0.72 |
| bioA | adenosylm               | 1.14 | 0.1  | 1 | 0.9  | 0.13 | 1   | 0.8  |
|      | ne protein              | 0.22 | 0.07 | 1 | 0.83 | 0.12 | 1   | n/a  |
|      | conserved               | 0.95 | 0.09 | 1 | 0.98 | 0.15 | 1   | 1.19 |
| rmbA | conserved               | 0.91 | 0.16 | 1 | 1.25 | 0.28 | 1   | 1.56 |
|      | conserved               | 0.99 | 0.08 | 1 | 1.11 | 0.09 | 1   | 1.29 |
| sseF | putative pa             | 0.85 | 0.14 | 1 | 0.73 | 0.11 | 1   | 0.78 |
| ompX | outer mem               | 1.26 | 0.15 | 1 | 0.96 | 0.18 | 1   | 0.88 |
| sgaB | putative PT             | 0.88 | 0.09 | 1 | 1.05 | 0.17 | 1   | 1.06 |
|      | ribokinase family       | 0.07 | 0.02 | 1 | 1.19 | 0.14 | 1   | n/a  |
| araJ |                         | 1.04 | 0.09 | 1 | 1.01 | 0.13 | 1   | 0.91 |
|      | st modification         | 0.64 | 0.06 | 1 | 1.15 | 0.15 | 1   | 1.1  |
| ybaV | putative ex             | 1.03 | 0.09 | 1 | 0.9  | 0.12 | 1   | 0.93 |
|      | hypothetica             | 0.9  | 0.11 | 1 | 1.07 | 0.21 | 1   | 0.94 |
|      |                         | 0.99 | 0.12 | 1 | 1.07 | 0.15 | n/a | 0.87 |
|      |                         | 0.85 | 0.11 | 1 | 0.9  | 0.07 | 1   | 0.94 |
|      | hypothetica             | 0.87 | 0.1  | 1 | 0.95 | 0.14 | 1   | 1.03 |
|      | possible tra            | 0.86 | 0.07 | 1 | 0.95 | 0.19 | 1   | 0.94 |
| syd  | syd protein             | 0.93 | 0.08 | 1 | 1.01 | 0.04 | 1   | 1.08 |
|      | hypothetica             | 0.95 | 0.18 | 1 | 1.06 | 0.15 | 1   | 1.22 |
|      | hypothetica             | 1.01 | 0.15 | 1 | 1.21 | 0.13 | 1   | 1.45 |
|      | putative PT             | 1.07 | 0.18 | 1 | 1.28 | 0.26 | 1   | 1.61 |
| hybG | hydrogenas              | 1.2  | 0.1  | 1 | 1.09 | 0.13 | 1   | 1.24 |
|      | hydrogenas              | 1.08 | 0.12 | 1 | 0.63 | 0.1  | 1   | 0.64 |
| marR | multiple an             | 1.1  | 0.1  | 1 | 0.67 | 0.05 | 1   | 0.76 |
| yidH |                         | 1.01 | 0.11 | 1 | 1.38 | 0.18 | 1   | 1.31 |
| recG | ATP-deper               | 0.98 | 0.06 | 1 | 1.4  | 0.14 | 1   | 1.19 |
|      | putative me             | 1.03 | 0.09 | 1 | 1.11 | 0.2  | 1   | 1.48 |
| ilvN | acetohydro              | 1.06 | 0.09 | 1 | 1.24 | 0.2  | 1   | 1.33 |
|      | rotein                  | 0.25 | 0.04 | 1 | 1.11 | 0.14 | 1   | n/a  |
|      | conserved               | 1.04 | 0.08 | 1 | 0.93 | 0.14 | 0   | 0.84 |
|      | uplicate of gltU,V,W)   | 0.92 | 0.15 | 0 | 1.23 | 0.35 | 0   | n/a  |
|      | rotein                  | 0.46 | 0.31 | 0 | 0.96 | 0.2  | 0   | n/a  |
|      | rotein                  | 0.97 | 0.14 | 1 | 1.47 | 0.32 | 0   | n/a  |
|      | 1 of DNA synthesis      | 0.95 | 0.14 | 0 | 1.32 | 0.44 | 0   | n/a  |
|      | ne start                | 1    | 0.15 | 1 | 1.35 | 0.25 | 0   | n/a  |
|      | putative me             | 1.05 | 0.15 | 1 | 1.51 | 0.33 | 0   | 1.14 |
|      | rotein                  | 1.04 | 0.14 | 1 | 1.15 | 0.42 | 1   | n/a  |
|      | conserved               | 1.05 | 0.1  | 1 | 1.08 | 0.07 | 1   | 1.11 |
|      | hypothetica             | 1.14 | 0.08 | 1 | 0.76 | 0.11 | 1   | 0.84 |
|      | id mutagens; related to | 0.12 | 0.02 | 1 | 0.68 | 0.04 | n/a | n/a  |
|      | id mutagens; related to | 0.11 | 0.01 | 1 | 0.66 | 0.06 | n/a | n/a  |
|      | ulence: outer membrar   | 0.04 | 0.02 | 1 | 0.71 | 0.1  | n/a | n/a  |
|      | ne protein              | 0.07 | 0.02 | 1 | 0.69 | 0.07 | n/a | n/a  |

|        |              |       |       |     |      |      |     |     |      |
|--------|--------------|-------|-------|-----|------|------|-----|-----|------|
| rotein |              | 0.04  | 0.01  | 1   | 0.65 | 0.09 | n/a | n/a |      |
|        |              | 0.03  | 0.01  | 1   | 0.61 | 0.09 | n/a | n/a |      |
| rotein |              | 0.07  | 0.02  | 1   | 0.65 | 0.1  | n/a | n/a |      |
|        |              | 0.22  | 0.13  | 1   | 1.15 | 0.59 | n/a | n/a |      |
|        | n/a          | n/a   | n/a   | n/a | n/a  | n/a  | n/a | n/a |      |
|        |              | 1     | 0.06  | 1   | 0.77 | 0.14 | n/a |     | 0.95 |
|        |              | 0.94  | 0.04  | 1   | 0.84 | 0.09 | n/a |     | 0.91 |
|        |              | 0.95  | 0.08  | 1   | 0.85 | 0.14 | n/a |     | 0.91 |
|        |              | 0.99  | 0.08  | 1   | 0.84 | 0.08 | n/a |     | 1.1  |
| aegA   | putative ox  | 0.92  | 0.08  | 1   | 0.91 | 0.09 |     | 1   | 0.98 |
| osase  |              | 0.44  | 0.07  | 1   | 0.91 | 0.22 |     | 0   | n/a  |
| staC   | outer mem    | 19.7  | 9.76  | 1   | n/a  | n/a  | n/a |     | 0.88 |
|        | conserved    | 4.67  | 0.77  | 1   | n/a  | n/a  | n/a |     | 0.95 |
|        |              | 1.25  | 0.11  | 1   | 0.94 | 0.09 | n/a |     | 0.84 |
|        | putative ba  | 5.25  | 0.69  | 1   | n/a  | n/a  | n/a |     | 0.85 |
|        | putative ba  | 23.86 | 7.16  | 1   | n/a  | n/a  | n/a |     | 0.8  |
|        | putative ba  | 12.17 | 2.24  | 1   | n/a  | n/a  | n/a |     | 0.92 |
|        | putative aut | 2.05  | 0.37  | 1   | 1.15 | 0.22 | n/a |     | 1.07 |
|        | prophage k   | 4.3   | 0.86  | 1   | n/a  | n/a  | n/a |     | 0.84 |
|        | putative pr  | 12.01 | 4.54  | 1   | n/a  | n/a  | n/a |     | 0.79 |
|        | putative ba  | 15.57 | 5.95  | 1   | n/a  | n/a  | n/a |     | 0.82 |
| steC   | periplasmic  | 9.69  | 6.14  | 1   | n/a  | n/a  | n/a |     | 1.08 |
|        | putative ex  | 9.78  | 2.8   | 1   | n/a  | n/a  | n/a |     | 1.14 |
|        | hypothetica  | 1.45  | 0.21  | 1   | n/a  | n/a  | n/a |     | 0.82 |
|        | putative pr  | 3.24  | 1.65  | 1   | n/a  | n/a  | n/a |     | 0.76 |
|        | putative ba  | 12.51 | 2.99  | 1   | n/a  | n/a  | n/a |     | 0.74 |
|        | putative ba  | 11.18 | 2.56  | 1   | n/a  | n/a  | n/a |     | 0.75 |
|        | possible int | 10.42 | 4.96  | 1   | n/a  | n/a  | n/a |     | 1.14 |
|        | putative me  | 8.78  | 3.34  | 1   | n/a  | n/a  | n/a |     | 0.95 |
|        |              | 0.88  | 0.06  | 1   | 0.83 | 0.13 | n/a |     | 0.69 |
|        | hypothetica  | 23.02 | 6.97  | 1   | n/a  | n/a  | n/a |     | 0.75 |
|        | conserved    | 6.3   | 2.34  | 1   | n/a  | n/a  | n/a |     | 0.77 |
|        | hypothetica  | 13.23 | 1.33  | 1   | n/a  | n/a  | n/a |     | 0.77 |
| oadA   | oxaloaceta   | 1     | 0.09  | 1   | 1.05 | 0.11 | n/a |     | 1.03 |
|        | DNA adeni    | 8.16  | 2.28  | 1   | n/a  | n/a  | n/a |     | 1.22 |
|        | hypothetica  | 1.93  | 0.33  | 1   | n/a  | n/a  | n/a |     | 1.35 |
|        |              | 1.06  | 0.09  | 1   | 1.25 | 0.08 | n/a |     | 1.16 |
|        | hypothetica  | 11.07 | 1.88  | 1   | n/a  | n/a  | n/a |     | 1.3  |
|        | putative me  | 3.82  | 0.38  | 1   | n/a  | n/a  | n/a |     | 1.16 |
|        | hypothetica  | 5.29  | 4.67  | 1   | n/a  | n/a  | n/a |     | 1.13 |
|        |              | 1.15  | 0.07  | 1   | 1.08 | 0.14 | n/a |     | 1.04 |
|        | putative me  | 13.47 | 2.47  | 1   | n/a  | n/a  | n/a |     | 1.12 |
|        | conserved    | 6.69  | 1.29  | 1   | n/a  | n/a  | n/a |     | 1.18 |
|        | DNA adeni    | 2.71  | 0.39  | 1   | n/a  | n/a  | n/a |     | 1.18 |
| insB   | insertion el | 10.69 | 10.72 | 1   | n/a  | n/a  | n/a |     | 0.93 |
|        | hypothetica  | 3.43  | 0.52  | 1   | n/a  | n/a  | n/a |     | 1.06 |
|        | putative me  | 32.49 | 6.04  | 1   | n/a  | n/a  | n/a |     | 0.94 |
| torD   | TorD prote   | 0.94  | 0.06  | 1   | 1.37 | 0.81 |     | 1   | 1.48 |
| thdF   | thiophene a  | 0.99  | 0.08  | 1   | 1.33 | 0.25 |     | 1   | 1.5  |
| atpB   | ATP syntha   | 1.07  | 0.17  | 1   | 1.26 | 0.3  |     | 1   | 1.39 |
| waaZ   | lipopolysac  | 1.02  | 0.13  | 1   | 1.29 | 0.19 |     | 1   | 1.66 |
|        | possible Af  | 0.99  | 0.1   | 1   | 1.12 | 0.09 |     | 1   | 1.27 |

|                          |              |      |      |   |      |      |     |      |
|--------------------------|--------------|------|------|---|------|------|-----|------|
| ne protein               |              | 0.95 | 0.07 | 1 | 1.03 | 0.09 | 1   | n/a  |
| sspA                     | stringent st | 0.96 | 0.1  | 1 | 1.13 | 0.17 | 1   | 1.33 |
| mreB                     | rod shape-   | 1.04 | 0.1  | 1 | 1.14 | 0.11 | 1   | 1.26 |
| dacA                     | D-alanine c  | 0.95 | 0.09 | 1 | 0.97 | 0.26 | 1   | 0.97 |
| tein, homolog of hsp70   |              | 0.1  | 0.03 | 1 | 0.91 | 0.83 | 1   | n/a  |
| fur                      | ferric uptak | 1    | 0.09 | 1 | 1.04 | 0.51 | 1   | 0.95 |
| torR                     |              | 0.89 | 0.07 | 1 | 1.36 | 0.14 | 1   | 1.36 |
| hyaC2                    | Ni/Fe-hydr   | 0.99 | 0.06 | 1 | 0.69 | 0.19 | 1   | 0.74 |
| se in bifunctional: 2-ox |              | 0.08 | 0.02 | 1 | 1.33 | 0.17 | n/a | n/a  |
| ydZ                      | putative Ly  | 0.77 | 0.05 | 1 | 1.31 | 0.57 | 1   | 1.28 |
| kup                      | membrane     | 0.9  | 0.1  | 1 | 1.25 | 0.08 | 1   | 1.4  |
| rfc                      | O-antigen p  | 1    | 0.14 | 1 | 0.77 | 0.33 | 1   | 0.9  |
| galE                     | UDP-gluco    | 0.92 | 0.1  | 1 | 0.9  | 0.18 | 1   | 0.9  |
| cbiT                     | precorrin-8  | 0.99 | 0.12 | 1 | 1.21 | 0.26 | 1   | 0.94 |
| waakK                    | lipopolysac  | 0.87 | 0.06 | 1 | 1.17 | 0.69 | 1   | 1.48 |
|                          | putative s   | 1.04 | 0.06 | 1 | 1    | 0.15 | 1   | 1.11 |
| yacG                     | conserved    | 0.89 | 0.07 | 1 | 1.06 | 0.16 | 1   | 1.05 |
| yadF                     | carbonic ar  | 0.98 | 0.08 | 1 | 1.07 | 0.08 | 1   | 1.17 |
| yaeH                     | conserved    | 1.03 | 0.21 | 1 | 1.34 | 0.41 | 1   | 1.03 |
|                          | conserved    | 0.94 | 0.05 | 1 | 1.02 | 0.11 | 1   | 1.28 |
|                          | conserved    | 1.01 | 0.16 | 1 | 1.35 | 0.28 | 1   | 1.27 |
| ndh                      | NADH dehy    | 0.97 | 0.08 | 1 | 0.88 | 0.2  | 1   | 0.77 |
|                          | putative cyi | 0.99 | 0.08 | 1 | 1.24 | 0.44 | 0   | 0.8  |
|                          | putative ou  | 1.05 | 0.1  | 1 | 0.7  | 0.12 | 1   | 0.89 |
| wzc                      | putative tyr | 1.03 | 0.1  | 1 | 0.95 | 0.18 | 1   | 0.97 |
|                          | putative se  | 0.87 | 0.08 | 0 | 1.26 | 0.41 | 0   | 0.67 |
|                          | conserved    | 0.88 | 0.09 | 1 | 1.14 | 0.32 | 0   | 0.85 |
|                          | putative ox  | 0.98 | 0.09 | 1 | 0.73 | 0.13 | 1   | 0.75 |
| yegH                     | putative me  | 0.95 | 0.08 | 1 | 0.81 | 0.05 | 1   | 0.88 |
| lasT                     | putative RN  | 0.88 | 0.06 | 1 | 1.11 | 0.17 | 1   | 1.19 |
| ie                       |              | 0.06 | 0.01 | 1 | 0.91 | 0.08 | 1   | n/a  |
| gmd                      | GDP-manr     | 0.94 | 0.11 | 1 | 0.78 | 0.06 | 1   | 0.84 |
|                          | putative pro | 1.01 | 0.18 | 1 | 0.79 | 2.02 | 1   | 0.87 |
| rotein                   |              | 0.33 | 0.02 | 1 | 0.89 | 0.41 | 1   | n/a  |
|                          |              | 1    | 0.22 | 1 | 1.09 | 0.27 | 0   | 0.95 |
| late isomerase (dehydr   |              | 0.07 | 0.02 | 1 | 0.96 | 0.07 | 1   | n/a  |
|                          | conserved    | 0.98 | 0.1  | 1 | 0.87 | 0.42 | 1   | 0.77 |
| udhA                     | possible py  | 0.95 | 0.07 | 1 | 1.28 | 0.09 | 1   | 1.34 |
| hyi                      | putative hy  | 0.9  | 0.07 | 1 | 1.1  | 0.16 | 1   | 1.16 |
|                          | conserved    | 1.03 | 0.26 | 1 | 0.94 | 0.31 | 1   | 1.06 |
|                          | putative tra | 0.99 | 0.08 | 1 | 0.96 | 0.14 | 1   | 0.92 |
| ive minor tail protein   |              | 0.08 | 0.02 | 1 | 0.76 | 0.05 | 1   | n/a  |
| ndk                      | nucleoside   | 0.89 | 0.07 | 1 | 1.06 | 0.51 | 1   | 1.21 |
|                          |              | 0.17 | 0.08 | 1 | 0.95 | 0.22 | 1   | n/a  |
| guaA                     | GMP synth    | 0.78 | 0.08 | 1 | 0.87 | 0.34 | 1   | 1.02 |
| yfhP                     | conserved    | 0.99 | 0.12 | 1 | 1.05 | 0.14 | 1   | 1.19 |
| ilar to phage tail assem |              | 0.1  | 0.02 | 1 | 0.84 | 0.08 | n/a | n/a  |
| cpxR                     | two-compo    | 0.83 | 0.12 | 1 | 1.27 | 0.42 | 1   | 1.25 |
| ath protein              |              | 0.13 | 0.04 | 1 | 1.21 | 0.16 | 1   | n/a  |
|                          | possible m   | 0.92 | 0.08 | 1 | 0.98 | 0.1  | 1   | 1.15 |
|                          |              | 0.11 | 0.01 | 1 | 1.01 | 0.06 | 1   | n/a  |
| cysA                     | sulphate tr: | 0.8  | 0.05 | 1 | 0.94 | 0.09 | 1   | 0.98 |



|                         |               |      |      |   |      |          |       |      |
|-------------------------|---------------|------|------|---|------|----------|-------|------|
|                         | putative me   | 0.96 | 0.12 | 1 | 0.92 | 0.1      | 1     | 1    |
| sopD2                   |               | 0.81 | 0.27 | 1 | 0.69 | 0.15     | 1     | 0.94 |
|                         | putative ior  | 0.92 | 0.12 | 1 | 0.73 | 0.08     | 1     | 0.81 |
| smtA                    | SmtA prote    | 1.02 | 0.07 | 1 | 0.77 | 0.08     | 1     | 0.73 |
|                         | putative de   | 0.95 | 0.05 | 1 | 0.75 | 0.33     | 1     | 0.79 |
| hisH                    | amidotrans    | 0.97 | 0.11 | 1 | 0.81 | 0.03     | 1     | 0.93 |
|                         | putative so   | 0.96 | 0.24 | 1 | 0.83 | 0.15     | 1     | 0.89 |
| pduT                    | putative pr   | 0.82 | 0.12 | 1 | 0.85 | 0.08     | 1     | 0.83 |
|                         | putative me   | 1.09 | 0.11 | 1 | 0.75 | 0.19     | 1     | 0.88 |
|                         | putative tra  | 1.12 | 0.05 | 1 | 0.7  | 0.05     | 1     | 0.7  |
|                         | putative ou   | 1.01 | 0.07 | 1 | 0.99 | 0.31     | 1     | 0.85 |
| prpE                    | PrpE protei   | 1.08 | 0.11 | 1 | 0.9  | 0.11     | 1     | 0.79 |
| katE                    | catalase HI   | 1.01 | 0.1  | 1 | 0.81 | 0.17     | 1     | 0.87 |
| yjeS                    | putative 4F   | 0.85 | 0.09 | 1 | 1.05 | 0.1      | 1     | 1.27 |
|                         |               | 0.81 | 0.09 | 1 | 0.75 | 0.11 n/a |       | 0.93 |
|                         | putative tra  | 0.99 | 0.07 | 1 | 0.71 | 0.07     | 1     | 0.76 |
| yjfN                    | hypothetica   | 0.96 | 0.05 | 1 | 1.01 | 0.11     | 1     | 1.19 |
| porter                  |               | 0.08 | 0.06 | 1 | 1    | 0.09     | 1 n/a |      |
| ubiG                    | 3-demethyl    | 1.02 | 0.06 | 1 | 0.8  | 0.1      | 1     | 0.9  |
| ar/spermidine/putrescir |               | 0.06 | 0.1  | 1 | 1.14 | 0.16     | 1 n/a |      |
|                         |               | 0.91 | 0.06 | 1 | 1.05 | 0.13     | 1     | 1.09 |
| pmrF                    | putative lipi | 1    | 0.09 | 1 | 0.8  | 0.1      | 1     | 0.91 |
|                         | putative ox   | 0.91 | 0.08 | 1 | 0.95 | 0.24     | 1     | 0.96 |
| e                       |               | 0.1  | 0.06 | 1 | 1.26 | 0.16     | 1 n/a |      |
| aroQ                    | putative ch   | 0.94 | 0.09 | 1 | 0.69 | 0.14     | 1     | 0.94 |
| subunit; putative adhes |               | 0.1  | 0.03 | 1 | 1.06 | 0.1      | 1 n/a |      |
| prpB                    | putative ca   | 0.96 | 0.12 | 1 | 0.91 | 0.07     | 1     | 0.9  |
| yfiG                    | thioredoxin   | 0.89 | 0.11 | 1 | 1.07 | 0.18     | 1     | 1.05 |
| aroM                    | AroM prote    | 0.91 | 0.07 | 1 | 0.92 | 0.22     | 1     | 1.01 |
| dgkA                    | diacylglyce   | 1.08 | 0.15 | 1 | 1.37 | 0.59     | 1     | 1.31 |
|                         | conserved     | 0.83 | 0.03 | 1 | 1.27 | 0.64     | 1     | 1.03 |
|                         | putative lipi | 0.84 | 0.08 | 1 | 0.89 | 0.12     | 1     | 0.97 |
|                         | putative me   | 0.96 | 0.08 | 1 | 1.19 | 0.18     | 1     | 1.26 |
| ynhG                    |               | 0.82 | 0.07 | 1 | 0.68 | 0.51     | 1     | 0.86 |
|                         | N-hydroxye    | 1.05 | 0.08 | 1 | 0.65 | 3.43     | 1     | 0.77 |
| ada                     | ADA regula    | 0.95 | 0.09 | 1 | 0.98 | 0.13     | 1     | 0.88 |
|                         | putative Gr   | 1.05 | 0.09 | 1 | 1.16 | 0.15     | 1     | 1.45 |
| acpS                    | holo-[acyl-c  | 0.98 | 0.19 | 1 | 1.18 | 1.1      | 0     | 0.93 |
| speD                    | S-adenosyl    | 0.98 | 0.05 | 1 | 1.12 | 0.22     | 1     | 1.02 |
| sbmC                    | putative DN   | 0.99 | 0.08 | 1 | 0.88 | 0.33     | 1     | 0.89 |
| ampD                    | AmpD prot     | 1.02 | 0.07 | 1 | 0.94 | 0.06     | 1     | 0.89 |
|                         | probable se   | 1    | 0.05 | 1 | 1.03 | 0.05     | 1     | 0.94 |
| thrS                    | threonyl-tR   | 0.89 | 0.13 | 1 | 0.65 | 0.05     | 1     | 0.87 |
|                         | thiamine bi   | 0.92 | 0.05 | 1 | 1.03 | 0.19     | 1     | 0.95 |
|                         | putative an   | 0.9  | 0.09 | 1 | 0.73 | 0.21     | 1     | 0.73 |
|                         | conserved     | 0.97 | 0.13 | 1 | 0.94 | 0.17     | 1     | 0.98 |
|                         | conserved     | 0.99 | 0.1  | 1 | 0.91 | 0.09     | 1     | 0.88 |
| fepB                    | ferriererot   | 0.91 | 0.11 | 1 | 0.84 | 0.11     | 1     | 0.82 |
| valS                    | valyl-tRNA    | 0.91 | 0.08 | 1 | 1.07 | 0.28     | 1     | 1.3  |
| arcA                    | global resp   | 0.92 | 0.24 | 1 | 1.03 | 0.65     | 1     | 1.25 |
| cheM                    | methyl-acc    | 0.79 | 0.17 | 1 | 1.11 | 0.12     | 1     | 1.34 |
| trmH                    | tRNA (guar    | 0.94 | 0.1  | 1 | 1.27 | 0.2      | 1     | 1.36 |

|                   |              |      |      |   |      |      |     |      |
|-------------------|--------------|------|------|---|------|------|-----|------|
|                   | putative me  | 0.94 | 0.06 | 1 | 0.82 | 0.19 | 1   | 0.89 |
| xapB              | xanthosine   | 1.01 | 0.11 | 1 | 0.9  | 0.16 | 1   | 1    |
| iroB              | putative gly | 0.9  | 0.04 | 1 | 0.98 | 0.09 | 1   | 1.26 |
| ilar to head      | protein gpsl | 0.14 | 0.06 | 1 | 1.05 | 0.17 | 1   | n/a  |
|                   | putative da  | 0.52 | 0.17 | 1 | 0.89 | 0.2  | n/a | 0.93 |
| ilar to head-tail | preconn      | 0.05 | 0.02 | 1 | 1.03 | 0.08 | 1   | n/a  |
| yfiC              | conserved    | 0.84 | 0.06 | 1 | 0.92 | 0.14 | 1   | 1.07 |
| assT              | probable ai  | 0.94 | 0.06 | 1 | 1.07 | 0.34 | 1   | 1.28 |
|                   | putative Hly | 0.91 | 0.09 | 1 | 1.27 | 0.16 | 1   | 1.2  |
| yrfB              | putative me  | 0.82 | 0.05 | 1 | 1.17 | 0.17 | 1   | 1.19 |
|                   | hypothetica  | 0.96 | 0.1  | 1 | 0.96 | 0.1  | 1   | 1    |
| spaS              | secretory p  | 0.99 | 0.08 | 1 | 1.04 | 0.13 | 1   | 1.18 |
| in ethanolamine   | utilizati    | 0.87 | 0.05 | 1 | 1.18 | 0.21 | 1   | 1.01 |
| yiiM              | conserved    | 1    | 0.08 | 1 | 1.28 | 0.08 | 1   | 1.35 |
| ybeK              | probable ni  | 0.74 | 0.07 | 1 | 0.97 | 0.07 | 1   | 0.87 |
| ybfA              | putative ex  | 0.95 | 0.13 | 1 | 1.14 | 0.35 | 0   | 0.81 |
| invH              | cell adhera  | 0.87 | 0.09 | 1 | 1.01 | 0.1  | 1   | 1.29 |
| fimW              | fimbriae w   | 0.86 | 0.1  | 1 | 1.11 | 0.1  | 1   | 0.88 |
| ybhA              | conserved    | 0.98 | 0.06 | 1 | 0.83 | 0.11 | 1   | 0.83 |
|                   | ABC transp   | 1.04 | 0.11 | 1 | 1.18 | 0.3  | 1   | 0.72 |
| ompA              | outer mem    | 1.01 | 0.1  | 1 | 0.75 | 0.1  | 1   | 0.8  |
| flgE              | flagellar ho | 1.02 | 0.09 | 1 | 0.68 | 0.08 | 1   | 0.72 |
| prfA              | peptide cha  | 1.02 | 0.06 | 1 | 0.9  | 0.15 | 1   | 0.92 |
| otsA              | trehalose-6  | 0.96 | 0.07 | 1 | 0.95 | 0.36 | 1   | 0.88 |
|                   | hypothetica  | 0.85 | 0.19 | 0 | 1.25 | 0.83 | 0   | 0.75 |
| atpF              | ATP synth    | 1.03 | 0.09 | 1 | 1.27 | 0.16 | 1   | 1.24 |
| gloA              | lactoylgluta | 0.98 | 0.12 | 1 | 0.8  | 0.25 | 1   | 0.81 |
| yecS              | putative AE  | 1.07 | 0.02 | 1 | 0.75 | 0.08 | 1   | 0.72 |
|                   | putative ox  | 0.9  | 0.08 | 1 | 0.68 | 0.11 | 1   | 0.75 |
| rseB              | sigma-E fa   | 0.96 | 0.1  | 1 | 0.96 | 0.05 | 1   | 1.15 |
| gltA              | citrate synt | 0.97 | 0.07 | 1 | 0.88 | 0.1  | 1   | 0.85 |
| phoQ              | sensor proi  | 0.96 | 0.05 | 1 | 0.72 | 0.13 | 1   | 0.74 |
| purD              | phosphorib   | 0.79 | 0.07 | 1 | 1.22 | 0.05 | 1   | 1.27 |
| infB              | protein cha  | 0.91 | 0.07 | 1 | 1.09 | 0.14 | 1   | 1.29 |
| pduD              | diol dehydr  | 0.83 | 0.09 | 1 | 0.8  | 0.09 | 1   | 0.78 |
| treC              | trehalose-6  | 0.94 | 0.1  | 1 | 1.08 | 0.09 | 1   | 1.18 |
| spiA              | putative ou  | 0.98 | 0.05 | 1 | 0.65 | 0.05 | 1   | 0.82 |
| fabD              | malonyl Cc   | 0.97 | 0.1  | 1 | 0.73 | 0.1  | 1   | 0.72 |
| osmB              | osmotically  | 1.13 | 0.08 | 1 | 0.98 | 0.23 | 0   | 0.74 |
| ttdA              | tartrate def | 0.98 | 0.06 | 1 | 1    | 0.14 | 1   | 1.16 |
| waaP              | lipopolysac  | 0.93 | 0.06 | 1 | 1.27 | 0.11 | 1   | 1.38 |
| deoxyribonuclease |              | 0.07 | 0.01 | 1 | 0.84 | 0.09 | n/a | n/a  |
| csgB              | nucleation   | 0.95 | 0.16 | 1 | 0.8  | 0.28 | 1   | 0.88 |
| ubiB              | flavin reduc | 0.9  | 0.07 | 1 | 1.44 | 0.18 | 1   | 1.36 |
| rplS              | 50S riboso   | 1    | 0.12 | 1 | 1.02 | 0.21 | 1   | 1.17 |
| rffA              | lipopolysac  | 0.86 | 0.11 | 1 | 1.39 | 0.21 | 1   | 1.3  |
|                   | conserved    | 1.03 | 0.12 | 1 | 1.24 | 0.1  | 1   | 1.29 |
| flgl              | flagellar P- | 0.95 | 0.06 | 1 | 0.82 | 0.07 | 1   | 0.69 |
| cysG              | siroheme s   | 0.8  | 0.04 | 1 | 1.13 | 0.1  | 1   | 1.18 |
| lgt               | prolipoprot  | 1.03 | 0.07 | 1 | 1.03 | 0.06 | 1   | 1.05 |
| dnaG              | DNA prima    | 0.95 | 0.07 | 1 | 1.14 | 0.05 | 1   | 1.43 |
| phnU              | probable m   | 0.97 | 0.08 | 1 | 1.01 | 0.03 | 1   | 0.81 |

|                           |                   |      |      |   |      |      |   |      |
|---------------------------|-------------------|------|------|---|------|------|---|------|
| fdoH                      | formate de        | 0.92 | 0.12 | 1 | 1.28 | 0.14 | 1 | 1.3  |
| glnQ                      | glutamine t       | 0.94 | 0.04 | 1 | 1.07 | 0.26 | 1 | 0.77 |
| fadA                      | small (beta       | 0.89 | 0.06 | 1 | 1.27 | 0.22 | 1 | 1.2  |
| flhB                      | flagellar bic     | 1.05 | 0.06 | 1 | 0.7  | 0.13 | 1 | 0.76 |
|                           | putative ex       | 0.97 | 0.07 | 1 | 0.74 | 0.08 | 1 | 0.79 |
| yiaS                      | putative su       | 1.23 | 0.39 | 0 | 1.86 | 1.8  | 0 | 0.66 |
| yadE                      | conserved         | 0.87 | 0.08 | 1 | 0.92 | 0.2  | 1 | 0.99 |
| ahpC                      | alkyl hydrog      | 1.03 | 0.1  | 1 | 0.94 | 0.09 | 1 | 0.87 |
| galR                      | galactose c       | 0.99 | 0.08 | 1 | 1.11 | 0.1  | 1 | 1.01 |
|                           | putative lipi     | 0.86 | 0.04 | 1 | 1.25 | 0.09 | 1 | 1.47 |
| yebI                      | high-affinity     | 1    | 0.07 | 1 | 0.69 | 0.08 | 1 | 0.8  |
|                           | putative hy       | 0.92 | 0.06 | 1 | 0.69 | 0.31 | 1 | 0.77 |
| narY                      | respiratory       | 0.94 | 0.04 | 1 | 0.66 | 0.05 | 1 | 0.75 |
| narV                      | respiratory       | 1.11 | 0.11 | 1 | 0.69 | 0.11 | 1 | 0.66 |
| stbD                      | putative fir      | 0.98 | 0.08 | 1 | 0.92 | 0.08 | 1 | 0.92 |
| cls                       | cardiolipin :     | 1.04 | 0.04 | 1 | 0.68 | 0.04 | 1 | 0.74 |
|                           | conserved         | 0.83 | 0.09 | 1 | 0.75 | 0.06 | 1 | 0.83 |
|                           | conserved         | 0.94 | 0.08 | 1 | 0.76 | 0.09 | 1 | 0.82 |
| yebL                      | high-affinity     | 0.96 | 0.14 | 1 | 0.77 | 0.06 | 1 | 0.9  |
|                           | putative me       | 1.02 | 0.08 | 1 | 0.66 | 0.1  | 1 | 0.81 |
|                           | conserved         | 0.98 | 0.07 | 1 | 0.9  | 0.15 | 1 | 0.97 |
|                           | molybdopte        | 1.03 | 0.07 | 1 | 0.93 | 0.1  | 1 | 0.81 |
| ne protein                |                   | 0.09 | 0.02 | 1 | 1.02 | 0.11 | 1 | n/a  |
| fepG                      | ferric enter      | 0.99 | 0.05 | 1 | 0.93 | 0.83 | 1 | 0.74 |
|                           | possible tra      | 0.95 | 0.06 | 1 | 0.92 | 0.12 | 1 | 1.04 |
| citC                      | [citrate (pr      | 0.98 | 0.06 | 1 | 0.96 | 0.2  | 1 | 0.84 |
| rotein                    |                   | 0.15 | 0.04 | 1 | 0.59 | 0.07 | 1 | n/a  |
| appB                      | probable cy       | 1    | 0.08 | 1 | 0.67 | 0.04 | 1 | 0.77 |
| ne protein                |                   | 0.16 | 0.04 | 1 | 0.64 | 0.2  | 1 | n/a  |
| zwf                       | glucose 6- $\pi$  | 0.93 | 0.06 | 1 | 0.73 | 0.06 | 1 | 0.82 |
| phate isomerase           |                   | 0.29 | 0.08 | 1 | 0.72 | 0.08 | 1 | n/a  |
| binding periplasmic prc   |                   | 0.13 | 0.03 | 1 | 1.16 | 0.09 | 1 | n/a  |
|                           | putative typ      | 0.96 | 0.11 | 1 | 0.98 | 0.07 | 1 | 1.03 |
| pgk                       | phosphogly        | 0.96 | 0.09 | 1 | 1.12 | 0.09 | 1 | 1.16 |
|                           | putative de       | 0.92 | 0.1  | 1 | 0.93 | 0.06 | 1 | 0.94 |
|                           |                   | 0.87 | 0.05 | 1 | 1.2  | 0.2  | 1 | 1.25 |
| srlA                      | PTS syster        | 1.05 | 0.11 | 1 | 1.13 | 0.11 | 1 | 1.16 |
|                           | hypothetica       | 0.83 | 0.06 | 1 | 0.99 | 0.15 | 1 | 0.91 |
|                           | hypothetica       | 0.87 | 0.14 | 1 | 1.21 | 0.22 | 1 | 1.12 |
| fucU                      | fuscose op        | 0.92 | 0.07 | 1 | 1.07 | 0.09 | 1 | 1.23 |
| ir to orfG protein in pha |                   | 0.34 | 0.1  | 1 | 1.02 | 0.14 | 1 | n/a  |
| proC                      | pyrroline-5-      | 0.95 | 0.09 | 1 | 1.02 | 0.12 | 1 | 0.88 |
| cyoE                      | cytochrome        | 0.88 | 0.04 | 1 | 0.94 | 0.03 | 1 | 0.85 |
|                           | conserved         | 1.02 | 0.05 | 1 | 0.98 | 0.08 | 1 | 1.16 |
|                           | hypothetica       | 1.01 | 0.09 | 1 | 1.04 | 0.12 | 1 | 1.12 |
|                           | putative me       | 1.05 | 0.1  | 1 | 0.62 | 0.05 | 1 | 0.65 |
| ilvY                      | LysR-famil        | 0.81 | 0.04 | 1 | 1.32 | 0.16 | 1 | 1.19 |
| gutQ                      | putative ph       | 1.03 | 0.07 | 1 | 1.06 | 0.09 | 1 | 0.98 |
| ne protein                |                   | 0.98 | 0.07 | 1 | 1.18 | 0.15 | 1 | n/a  |
|                           |                   | 0.43 | 0.05 | 1 | 1.01 | 0.23 | 1 | 0.87 |
| oraA                      | putative re $\pi$ | 0.92 | 0.15 | 1 | 0.94 | 0.07 | 1 | 1.06 |
| galS                      | mgl repres:       | 0.88 | 0.08 | 1 | 0.8  | 0.12 | 1 | 0.93 |

|       |                           |      |      |   |      |          |       |      |
|-------|---------------------------|------|------|---|------|----------|-------|------|
| yejK  | nucleoid-as               | 0.86 | 0.08 | 1 | 0.84 | 0.08     | 1     | 0.86 |
|       |                           | 0.83 | 0.06 | 1 | 0.9  | 0.19     | 1     | 0.92 |
| yohG  | putative lipi             | 0.99 | 0.13 | 1 | 0.78 | 0.1      | 1     | 0.87 |
| fruA  | PTS syster                | 0.97 | 0.09 | 1 | 0.9  | 0.22     | 1     | 0.67 |
|       | putative nu               | 1.04 | 0.1  | 1 | 0.85 | 0.1      | 1     | 0.9  |
|       | putative n-l              | 0.99 | 0.1  | 1 | 0.71 | 0.08     | 1     | 0.73 |
| yiaM  | putative me               | 1.06 | 0.07 | 1 | 1.23 | 0.19     | 1     | 1.35 |
|       | conserved                 | 0.94 | 0.06 | 1 | 0.98 | 0.2      | 1     | 0.83 |
| yjfH  | probable tF               | 0.84 | 0.06 | 1 | 1.12 | 0.06     | 1     | 1.2  |
| yheN  | conserved                 | 0.91 | 0.12 | 1 | 1.21 | 0.15     | 1     | 1.26 |
| hflX  | HflX protei               | 0.94 | 0.11 | 1 | 1.17 | 0.09     | 1     | 1.21 |
|       | probable ai               | 0.92 | 0.03 | 1 | 1.08 | 0.08     | 1     | 1.03 |
| trpR  | probable tr               | 0.85 | 0.04 | 1 | 1.18 | 0.1      | 1     | 1.29 |
|       | conserved                 | 1.02 | 0.07 | 1 | 1    | 0.1      | 1     | 0.98 |
|       | putative me               | 0.99 | 0.08 | 1 | 0.81 | 0.16     | 1     | 0.81 |
| mltC  | membrane                  | 1.05 | 0.91 | 1 | 1.15 | 0.18     | 1     | 1.32 |
|       | conserved                 | 0.84 | 0.11 | 1 | 1.03 | 0.13     | 1     | 1.14 |
| nadA  | quinolinate               | 0.9  | 0.08 | 1 | 0.89 | 0.1      | 1     | 0.91 |
| dinG  |                           | 0.98 | 0.1  | 1 | 0.83 | 0.08     | 1     | 0.81 |
| recJ  | single-strar              | 0.91 | 0.09 | 1 | 1.03 | 0.08     | 1     | 1.11 |
|       | possible lip              | 1.02 | 0.09 | 1 | 1.12 | 0.12     | 1     | 1.21 |
| moaE  | molybdopte                | 1    | 0.06 | 1 | 0.9  | 0.05     | 1     | 0.78 |
| yliG  | conserved                 | 1.02 | 0.04 | 1 | 0.87 | 0.06     | 1     | 0.75 |
| ttrC  | tetrathional              | 0.92 | 0.08 | 1 | 0.69 | 0.03     | 1     | 0.71 |
|       | conserved                 | 1    | 0.16 | 1 | 1.24 | 0.29     | 1     | 1.18 |
| ase 2 | flagellin (filament       | 0.37 | 0.07 | 1 | 0.94 | 0.09 n/a |       | 0.78 |
|       | putative me               | 0.92 | 0.04 | 1 | 1.07 | 0.12     | 1     | 1.03 |
| ybiW  | putative for              | 0.91 | 0.04 | 1 | 0.9  | 0.07     | 1     | 0.86 |
|       | putative me               | 0.98 | 0.06 | 1 | 0.95 | 0.09     | 1     | 0.86 |
| bolA  | BolA protei               | 1.02 | 0.14 | 1 | 0.96 | 0.05     | 1     | 0.94 |
|       | DNA helicases             | 0.04 | 0.01 | 1 | 1.11 | 0.13     | 1 n/a |      |
|       | ar to late control gene E | 0.46 | 0.13 | 1 | 0.95 | 0.09     | 1 n/a |      |
| e     |                           | 0.12 | 0.04 | 1 | 1.04 | 0.13     | 1 n/a |      |
| ecnA  | entericidin               | 0.8  | 0.04 | 0 | 1.16 | 0.28     | 0     | 1.14 |
|       | latory protein, merR fan  | 0.24 | 0.06 | 1 | 1.06 | 0.06     | 1 n/a |      |
| cutA  | periplasmic               | 0.9  | 0.06 | 1 | 1.08 | 0.13     | 1     | 1.15 |
| frdD  | fumarate re               | 0.93 | 0.08 | 1 | 1.08 | 0.06     | 1     | 0.63 |
| invF  | possible Ar               | 1    | 0.09 | 1 | 0.66 | 0.06     | 1     | 0.75 |
| ipk   | isopentenyl               | 0.91 | 0.07 | 1 | 0.73 | 0.06     | 1     | 0.85 |
|       | phage base                | 0.85 | 0.14 | 1 | 0.92 | 0.09     | 1     | 1.14 |
| wcaH  | putative O-               | 1.04 | 0.06 | 1 | 0.83 | 0.07     | 1     | 0.83 |
|       | phage-like                | 1.01 | 0.05 | 1 | 1.16 | 0.07     | 1     | 1.24 |
| rpmA  | 50S riboso                | 1    | 0.08 | 1 | 1.08 | 0.09     | 1     | 1.18 |
|       | conserved                 | 0.96 | 0.07 | 1 | 1.15 | 0.12     | 1     | 1.39 |
|       | hypothetica               | 1    | 0.06 | 1 | 1.06 | 0.08     | 1     | 1.21 |
| pykA  | pyruvate ki               | 0.99 | 0.04 | 1 | 0.74 | 0.07     | 1     | 0.8  |
|       | putative se               | 0.88 | 0.07 | 1 | 0.69 | 0.06     | 1     | 0.72 |
|       | conserved                 | 0.83 | 0.13 | 1 | 1.08 | 0.07     | 1     | 1.46 |
|       | conserved                 | 0.99 | 0.07 | 1 | 0.82 | 0.07     | 1     | 0.97 |
|       | hypothetica               | 1.08 | 0.07 | 1 | 0.94 | 0.06     | 1     | 0.85 |
| ypeB  | conserved                 | 0.89 | 0.09 | 1 | 0.84 | 0.04     | 1     | 0.92 |
|       | zinc-rich repeat protein  | 0.11 | 0.04 | 1 | 0.86 | 0.05     | 1 n/a |      |

|            |               |       |       |       |      |          |     |      |
|------------|---------------|-------|-------|-------|------|----------|-----|------|
|            | conserved     | 0.86  | 0.11  | 1     | 0.94 | 0.11     | 1   | 0.96 |
|            | conserved     | 0.98  | 0.11  | 1     | 0.95 | 0.13     | 1   | 1.11 |
|            | conserved     | 0.99  | 0.07  | 1     | 0.86 | 0.04     | 1   | 0.89 |
|            | conserved     | 1.04  | 0.14  | 1     | 0.76 | 0.1      | 1   | 0.85 |
| chaB       | cation trans  | 0.94  | 0.14  | 1     | 0.68 | 0.07     | 1   | 0.79 |
| lipB       | lipoate-prot  | 0.95  | 0.05  | 1     | 0.87 | 0.05     | 1   | 0.8  |
|            | putative lipi | 1.06  | 0.07  | 1     | 0.88 | 0.04     | 1   | 0.82 |
| folC       | folylpolyglu  | 0.96  | 0.1   | 1     | 0.83 | 0.08     | 1   | 0.83 |
| drase      |               | 0.03  | 0.01  | 1     | 0.63 | 0.08 n/a | n/a |      |
| rotein     |               | 0.2   | 0.18  | 1     | 0.87 | 0.29 n/a | n/a |      |
| rotein     |               | 0.09  | 0.04  | 1     | 0.69 | 0.08 n/a | n/a |      |
| egulation  |               | 0.05  | 0.02  | 1     | 0.66 | 0.08 n/a | n/a |      |
| ne protein |               | 0.05  | 0.06  | 1     | 0.65 | 0.09 n/a | n/a |      |
| : antidote |               | 0.09  | 0.03  | 1     | 0.71 | 0.05 n/a | n/a |      |
| ε D        |               | 0.06  | 0.02  | 1     | 0.59 | 0.07 n/a | n/a |      |
|            |               | 0.93  | 0.25  | 0     | 1.52 | 0.45 n/a | n/a |      |
|            | n/a           | n/a   | n/a   | n/a   | n/a  | n/a      | n/a |      |
| acrB       | acriflavin re | 1.02  | 0.12  | 1     | 0.94 | 0.14     | 1   | 0.83 |
|            |               | 1.01  | 0.08  | 1     | 0.98 | 0.07 n/a |     | 0.93 |
|            |               | 0.9   | 0.12  | 0     | 1.4  | 0.34 n/a | n/a |      |
|            |               | 1     | 0.64  | 0     | 1.13 | 0.4      | 0   | 0.83 |
|            |               | 1.02  | 0.04  | 1     | 0.96 | 0.08 n/a |     | 0.89 |
|            |               | 0.99  | 0.12  | 1     | 0.97 | 0.06 n/a |     | 0.89 |
| hlyE       | haemolysin    | 5.16  | 2.57  | 1 n/a | n/a  | n/a      |     | 0.76 |
|            | hypothetica   | 21.03 | 4.46  | 1 n/a | n/a  | n/a      |     | 0.68 |
|            | hypothetica   | 16.08 | 3.65  | 1 n/a | n/a  | n/a      |     | 0.73 |
|            | bacteriophage | 15.04 | 8.96  | 1 n/a | n/a  | n/a      |     | 0.7  |
| yjcS       | putative hy   | 9.21  | 7.52  | 1 n/a | n/a  | n/a      |     | 0.77 |
|            | putative ba   | 20.5  | 4.32  | 1 n/a | n/a  | n/a      |     | 0.79 |
|            | hypothetica   | 14.79 | 2.97  | 1 n/a | n/a  | n/a      |     | 0.71 |
|            | hypothetica   | 10.48 | 2.91  | 1 n/a | n/a  | n/a      |     | 0.68 |
| cdtB       | putative tox  | 8.42  | 7.23  | 1 n/a | n/a  | n/a      |     | 0.79 |
|            | putative ba   | 20    | 6.82  | 1 n/a | n/a  | n/a      |     | 0.73 |
|            | hypothetica   | 6.61  | 0.9   | 1 n/a | n/a  | n/a      |     | 0.94 |
|            | putative DN   | 31.33 | 3.37  | 1 n/a | n/a  | n/a      |     | 0.77 |
|            | hypothetica   | 6.63  | 1.48  | 1 n/a | n/a  | n/a      |     | 0.65 |
|            | putative N/   | 1.11  | 0.11  | 1     | 0.66 | 0.06 n/a |     | 0.63 |
|            | putative ba   | 17.79 | 8.45  | 1 n/a | n/a  | n/a      |     | 0.76 |
|            | putative ba   | 24.54 | 8.35  | 1 n/a | n/a  | n/a      |     | 0.81 |
|            | putative tra  | 45.86 | 18.57 | 1 n/a | n/a  | n/a      |     | 0.77 |
| racC       | putative ba   | 11.47 | 2.7   | 1 n/a | n/a  | n/a      |     | 0.97 |
|            |               | 1.04  | 0.1   | 1     | 0.72 | 0.08 n/a |     | 0.75 |
|            | putative ba   | 14.09 | 3.11  | 1 n/a | n/a  | n/a      |     | 0.78 |
|            | putative ba   | 15.52 | 5.88  | 1 n/a | n/a  | n/a      |     | 0.72 |
|            | hypothetica   | 3.6   | 0.85  | 1 n/a | n/a  | n/a      |     | 1.23 |
|            | conserved     | 11.16 | 2.83  | 1 n/a | n/a  | n/a      |     | 0.83 |
|            | hypothetica   | 8.74  | 1.35  | 1 n/a | n/a  | n/a      |     | 0.71 |
|            | hypothetica   | 4.93  | 1.98  | 1 n/a | n/a  | n/a      |     | 1.28 |
|            |               | 1.37  | 0.11  | 1     | 0.93 | 0.08 n/a |     | 1.25 |
| pilR       | putative me   | 20.4  | 4.59  | 1 n/a | n/a  | n/a      |     | 0.94 |
|            | putative me   | 18.61 | 4.76  | 1 n/a | n/a  | n/a      |     | 1.22 |
|            | conserved     | 27.54 | 9.41  | 1 n/a | n/a  | n/a      |     | 1.09 |

|                         |               |       |      |   |      |      |     |      |
|-------------------------|---------------|-------|------|---|------|------|-----|------|
|                         | putative po   | 4.06  | 0.35 | 1 | n/a  | n/a  | n/a | 1.21 |
|                         | hypothetica   | 4.61  | 0.97 | 1 | n/a  | n/a  | n/a | 1.1  |
| yafM                    | conserved     | 3.93  | 1.59 | 1 | n/a  | n/a  | n/a | 1.12 |
|                         | cytochrome    | 1.66  | 0.12 | 1 | 1.11 | 0.07 | n/a | 1.08 |
| pilO                    | putative pil  | 25.04 | 4.88 | 1 | n/a  | n/a  | n/a | 1.14 |
|                         | putative ex   | 7.6   | 4.31 | 1 | n/a  | n/a  | n/a | 1.04 |
|                         |               | 1.37  | 0.13 | 1 | 1.03 | 0.15 | n/a | 1.13 |
| yadG                    | hypothetica   | 0.87  | 0.06 | 1 | 1.05 | 0.18 | 1   | 1.06 |
| lpxB                    | lipid-A-disa  | 0.99  | 0.08 | 1 | 1.16 | 0.3  | 1   | 0.91 |
|                         | putative ox   | 1.06  | 0.04 | 1 | 0.8  | 0.1  | 1   | 0.76 |
| pmrA                    | two-compo     | 1.01  | 0.09 | 1 | 1.21 | 0.27 | 1   | 1.25 |
| pgtA                    | phosphogly    | 0.97  | 0.03 | 1 | 0.86 | 0.08 | 1   | 0.9  |
| atpI                    | ATP synthase  | 1.02  | 0.04 | 1 | 1.39 | 0.08 | 1   | 1.39 |
| fis                     | Fis DNA-bi    | 0.95  | 0.08 | 1 | 1.23 | 0.12 | 1   | 1.39 |
| cbiB                    | CbiB protei   | 1.02  | 0.05 | 1 | 0.75 | 10.4 | 1   | 0.73 |
| cobU                    | cobinamide    | 0.94  | 0.12 | 1 | 0.87 | 0.04 | 1   | 0.76 |
| citF2                   | citrate lyase | 0.89  | 0.06 | 1 | 1.02 | 0.08 | 1   | 1.02 |
| ispB                    | octaprenyl-   | 1     | 0.05 | 1 | 1.3  | 0.42 | 1   | 1.34 |
| rotein                  |               | 0.28  | 0.08 | 1 | 1.26 | 0.09 | 1   | n/a  |
| rluA                    | ribosomal l   | 0.89  | 0.09 | 1 | 1.24 | 0.11 | 1   | 1.02 |
| aceE                    | pyruvate de   | 0.93  | 0.13 | 1 | 1.05 | 0.08 | 1   | 1.02 |
| it                      |               | 0.17  | 0.03 | 1 | 1.2  | 0.17 | 1   | n/a  |
| dgt                     | deoxyguan     | 0.96  | 0.07 | 1 | 1.06 | 0.14 | 1   | 1.09 |
| yaeJ                    | putative rel  | 0.97  | 0.07 | 1 | 0.98 | 0.26 | 1   | 0.84 |
|                         | putative alc  | 0.76  | 0.1  | 1 | 0.7  | 0.26 | 1   | 0.71 |
| leuS                    | leucyl-tRNA   | 0.87  | 0.09 | 1 | 0.93 | 0.1  | 1   | 0.89 |
| ne protein              |               | 0.31  | 0.02 | 1 | 0.96 | 0.07 | 1   | n/a  |
|                         | probable D    | 1.09  | 0.08 | 1 | 0.89 | 0.19 | 1   | 0.8  |
|                         | conserved     | 1.04  | 0.08 | 1 | 1.11 | 0.24 | 1   | 1.1  |
| nucD2                   | putative lys  | 1.04  | 0.09 | 1 | 0.99 | 0.28 | 1   | 1.16 |
| rotein                  |               | 0.12  | 0.05 | 1 | 1.04 | 0.17 | 1   | n/a  |
|                         | conserved     | 0.99  | 0.09 | 1 | 1.04 | 0.15 | 1   | 1.11 |
| sthC                    |               | 0.92  | 0.08 | 1 | 1.17 | 0.21 | 1   | 1.21 |
| rotein                  |               | 0.3   | 0.02 | 1 | 1.26 | 0.46 | 0   | n/a  |
| ft; putative HSP70 clas |               | 0.21  | 0.05 | 1 | 1.13 | 0.27 | 0   | n/a  |
|                         |               | 0.11  | 0.03 | 1 | 1.04 | 0.28 | 1   | n/a  |
| groEL                   | GroEL prot    | 0.92  | 0.04 | 1 | 1.21 | 0.37 | 1   | 1.19 |
| yafK                    | putative ex   | 0.92  | 0.1  | 1 | 1.02 | 0.19 | 1   | 1.08 |
| able minor tail protein |               | 0.07  | 0.02 | 1 | 0.93 | 0.09 | 1   | n/a  |
|                         | conserved     | 1.12  | 0.11 | 1 | 1.15 | 0.3  | 1   | 0.8  |
|                         | putative tra  | 1.06  | 0.08 | 1 | 0.81 | 0.12 | 1   | 0.8  |
|                         | putative ex   | 1.04  | 0.07 | 1 | 0.79 | 0.17 | 1   | 0.86 |
|                         | putative pr   | 1.04  | 0.09 | 1 | 0.91 | 0.15 | 1   | 0.77 |
|                         |               | 1.03  | 0.08 | 1 | 0.97 | 0.17 | 1   | 0.78 |
| yrdB                    | conserved     | 0.92  | 0.12 | 1 | 1.16 | 0.32 | 1   | 1.1  |
| yheV                    | conserved     | 1.09  | 0.05 | 1 | 1.23 | 0.26 | 1   | 1.09 |
| mrcA                    | penicillin-bi | 0.87  | 0.06 | 1 | 1.23 | 0.25 | 1   | 1.26 |
| hate cyclase (with b34' |               | 0.17  | 0.04 | 1 | 1.19 | 0.15 | 1   | n/a  |
| gntU                    | low-affinity  | 0.79  | 0.09 | 1 | 1.33 | 0.14 | 1   | 1.26 |
| dmsA                    | anaerobic c   | 0.87  | 0.1  | 1 | 0.75 | 0.08 | 1   | 0.9  |
|                         | hypothetica   | 0.94  | 0.16 | 1 | 1.27 | 0.19 | 1   | 1.57 |
|                         | putative AE   | 1.04  | 0.07 | 1 | 1.37 | 0.16 | 1   | 1.21 |

|                          |                |      |      |   |      |      |     |      |
|--------------------------|----------------|------|------|---|------|------|-----|------|
| ate lyase activating enz |                | 0.17 | 0.03 | 1 | 1.27 | 0.18 | 1   | n/a  |
| fhlA                     | transcriptio   | 0.86 | 0.06 | 1 | 1.19 | 0.11 | 1   | 1.3  |
|                          |                | 0.61 | 0.06 | 1 | 1.16 | 0.11 | 1   | 1.17 |
| gldA                     | glycerol de    | 1.02 | 0.06 | 1 | 1.41 | 0.34 | 1   | 1.36 |
| hycD                     | formate hy     | 0.98 | 0.05 | 1 | 1.07 | 0.1  | 1   | 0.95 |
|                          | hypothetica    | 0.85 | 0.08 | 1 | 1.14 | 0.12 | 1   | 1.23 |
|                          |                | 0.15 | 0.04 | 1 | 1.12 | 0.2  | 1   | n/a  |
| yfeC                     | conserved      | 1.12 | 0.15 | 1 | 1.08 | 0.18 | 1   | 0.98 |
| narQ                     | nitrate/nitrit | 0.79 | 0.13 | 1 | 0.98 | 0.06 | 1   | 1.03 |
|                          |                | 0.16 | 0.01 | 1 | 0.91 | 0.12 | n/a | n/a  |
| glpX                     | putative gly   | 0.86 | 0.08 | 1 | 1.35 | 0.54 | 1   | 1.24 |
| ike IIC component        |                | 0.1  | 0.01 | 1 | 1.24 | 0.09 | 1   | n/a  |
| phnO                     | putative ac    | 0.92 | 0.1  | 1 | 1.21 | 0.19 | 1   | 1.25 |
| ne protein               |                | 0.4  | 0.16 | 0 | 1.13 | 0.38 | 1   | n/a  |
| xapA                     | xanthosine     | 0.97 | 0.08 | 1 | 0.9  | 0.11 | 1   | 0.94 |
|                          | putative AE    | 0.94 | 0.06 | 1 | 0.75 | 0.21 | 1   | 0.77 |
| pntB                     | pyridine nu    | 1.11 | 0.07 | 1 | 0.69 | 0.32 | 1   | 0.72 |
| ine protein              |                | 0.56 | 0.08 | 1 | 0.94 | 0.3  | 1   | 0.99 |
| bcfB                     | fimbrial cha   | 0.94 | 0.07 | 1 | 1.19 | 0.1  | 1   | 1.17 |
| yjfK                     | conserved      | 0.97 | 0.07 | 1 | 1.06 | 0.13 | 1   | 1.23 |
| ytfM                     | putative ex    | 1.01 | 0.1  | 1 | 1.25 | 0.17 | 1   | 1.22 |
| mpl                      | murein pep     | 1.01 | 0.05 | 1 | 1.16 | 0.18 | 1   | 1.12 |
|                          |                | 1.15 | 0.13 | 1 | 0.85 | 0.08 | 1   | 0.83 |
| rotein                   |                | 0.04 | 0.01 | 1 | 1.18 | 0.11 | 1   | n/a  |
|                          | putative su    | 0.94 | 0.06 | 1 | 1.18 | 0.13 | 1   | 1.09 |
|                          | putative ox    | 1.11 | 0.14 | 1 | 0.75 | 0.05 | 1   | 0.75 |
| infC                     | translation    | 1.08 | 0.07 | 1 | 0.91 | 0.36 | 1   | 0.86 |
|                          | putative an    | 0.93 | 0.04 | 1 | 0.86 | 0.14 | 1   | 0.96 |
|                          | putative su    | 0.96 | 0.09 | 1 | 0.81 | 0.11 | 1   | 0.78 |
| subunit                  |                | 0.11 | 0.01 | 1 | 1.04 | 0.11 | 1   | n/a  |
| msyB                     | acidic prote   | 1.05 | 0.13 | 1 | 0.91 | 0.29 | 1   | 0.77 |
|                          | conserved      | 1.01 | 0.07 | 1 | 1.17 | 0.47 | 1   | 0.83 |
| cfa                      | cyclopropa     | 0.96 | 0.1  | 1 | 0.85 | 0.2  | 1   | 0.86 |
| solA                     | putative sa    | 0.98 | 0.04 | 1 | 0.83 | 0.12 | 1   | 0.79 |
| ansA                     | L-Asparagi     | 0.9  | 0.1  | 1 | 0.8  | 0.14 | 1   | 0.86 |
| dsbA                     | thiol:disulfic | 1.01 | 0.06 | 1 | 1.38 | 0.23 | 1   | 1.6  |
| osmE                     | osmotically    | 1.02 | 0.13 | 1 | 0.81 | 0.1  | 1   | 0.76 |
| il assembly proteins     |                | 0.12 | 0.01 | 1 | 0.87 | 0.17 | n/a | n/a  |
| tyrS                     | tyrosyl-tRN    | 0.93 | 0.1  | 1 | 0.8  | 0.14 | 1   | 0.86 |
|                          | putative an    | 1.02 | 0.12 | 1 | 0.84 | 0.17 | 1   | 0.72 |
| mviN                     | virulence fa   | 1.04 | 0.09 | 1 | 0.82 | 0.06 | 1   | 0.67 |
| ssaO                     | putative typ   | 0.78 | 0.06 | 1 | 0.71 | 0.27 | 1   | 0.81 |
| gidB                     | glucose inh    | 1.01 | 0.08 | 1 | 1.46 | 0.11 | 1   | 1.45 |
| yfiD                     | conserved      | 1.19 | 0.13 | 1 | 1.26 | 0.44 | 0   | 0.94 |
| mesJ                     | cell cycle p   | 0.91 | 0.16 | 1 | 1.16 | 0.17 | 1   | 0.94 |
| malZ                     | maltodextri    | 0.94 | 0.14 | 1 | 1.24 | 0.35 | 1   | 0.88 |
| yjbB                     | putative me    | 0.94 | 0.05 | 1 | 1.33 | 0.17 | 1   | 1.1  |
|                          | Sodium:sol     | 1.07 | 0.07 | 1 | 1.23 | 0.14 | 1   | 1.02 |
| astB                     | succinylarg    | 0.98 | 0.1  | 1 | 0.79 | 0.11 | 1   | 0.82 |
|                          | conserved      | 0.89 | 0.02 | 1 | 0.85 | 0.21 | 1   | 0.92 |
|                          | putative ox    | 0.97 | 0.06 | 1 | 0.94 | 0.16 | 1   | 0.81 |
| ressor of fliC           |                | 0.18 | 0.04 | 1 | 0.97 | 0.15 | 1   | n/a  |

|                           |                    |      |      |   |      |          |       |      |
|---------------------------|--------------------|------|------|---|------|----------|-------|------|
| rfbB                      | dTDP-gluc          | 0.96 | 0.1  | 1 | 0.9  | 0.11     | 1     | 0.92 |
|                           | putative ph        | 0.91 | 0.07 | 1 | 1.07 | 0.11     | 1     | 1.05 |
| yadS                      | putative me        | 0.94 | 0.02 | 1 | 1.04 | 0.18     | 1     | 0.91 |
| fixB                      | FixB protei        | 0.95 | 0.1  | 1 | 1.11 | 0.2      | 1     | 1.01 |
| ampE                      | AmpE prot          | 1.02 | 0.11 | 1 | 1.13 | 0.09     | 1     | 0.99 |
| yhjJ                      | putative zir       | 0.95 | 0.09 | 1 | 1.32 | 0.13     | 1     | 1.35 |
| glpR                      | glycerol-3- $\phi$ | 1.02 | 0.08 | 1 | 1.21 | 0.21     | 1     | 1.2  |
| menE                      | O-succinylk        | 0.86 | 0.06 | 1 | 0.95 | 0.08     | 1     | 0.84 |
|                           | putative lip       | 1.06 | 0.08 | 1 | 0.89 | 0.14     | 1     | 1.03 |
|                           | hypothetica        | 1.13 | 0.15 | 1 | 1.26 | 0.17 n/a |       | 1    |
| gtrB                      | bactoprenc         | 0.96 | 0.08 | 1 | 0.97 | 0.28     | 1     | 0.89 |
| smg                       | putative me        | 0.98 | 0.05 | 1 | 1.22 | 11.33    | 1     | 1.13 |
|                           | putative ele       | 1.1  | 0.17 | 1 | 1.6  | 0.25     | 1     | 1.05 |
|                           | putative me        | 0.96 | 0.09 | 1 | 1.25 | 0.17     | 1     | 1.36 |
| yrfE                      | putative NL        | 1    | 0.09 | 1 | 1.18 | 0.13     | 1     | 1.21 |
|                           | putative tra       | 0.96 | 0.08 | 1 | 0.86 | 0.11     | 1     | 0.85 |
| uraA                      | uracil perm        | 0.97 | 0.1  | 1 | 1.04 | 0.14     | 1     | 0.91 |
| ackA                      | acetate kin        | 0.93 | 0.07 | 1 | 0.91 | 0.1      | 1     | 0.97 |
|                           | putative DN        | 0.58 | 0.04 | 1 | 0.86 | 0.08 n/a |       | 0.73 |
| arcC                      | carbamate          | 0.94 | 0.06 | 1 | 0.93 | 0.19     | 1     | 0.9  |
| yfL                       | putative me        | 1.05 | 0.09 | 1 | 1.14 | 0.64     | 1     | 1.12 |
| ilar to antirepressor pro |                    | 0.17 | 0.02 | 1 | 0.95 | 0.69     | 1 n/a |      |
|                           |                    | 0.98 | 0.04 | 1 | 1.2  | 0.16     | 1     | 1.36 |
| dam                       | DNA adeni          | 0.97 | 0.09 | 1 | 1.19 | 0.32     | 1     | 1.3  |
| fruB                      | pts system         | 1    | 0.07 | 1 | 0.96 | 0.07     | 1     | 0.85 |
| nrdB                      | ribonucleos        | 0.95 | 0.08 | 1 | 0.9  | 0.16     | 1     | 1.07 |
| eutL                      | ethanolami         | 0.96 | 0.06 | 1 | 1.03 | 0.16     | 1     | 1    |
|                           | putative rib       | 1.03 | 0.09 | 1 | 1.29 | 0.24     | 1     | 1.37 |
| ybfE                      | conserved          | 1.08 | 0.22 | 0 | 1.23 | 0.28     | 0     | 0.96 |
| envE                      | putative lip       | 0.96 | 0.05 | 1 | 0.73 | 0.12     | 1     | 0.84 |
| spaT                      | unknown fu         | 0.96 | 0.08 | 1 | 1.05 | 0.37     | 1     | 1.13 |
| yihE                      | conserved          | 1.07 | 0.08 | 1 | 1.43 | 0.17     | 1     | 1.23 |
|                           | conserved          | 0.91 | 0.16 | 1 | 1.05 | 0.14     | 1     | 0.86 |
| prkB                      | phosphorib         | 1    | 0.08 | 1 | 1.11 | 0.16     | 1     | 1.26 |
| iclR                      | acetate opt        | 0.83 | 0.03 | 1 | 1.24 | 0.14     | 1     | 1.27 |
|                           | putative ox        | 1.08 | 0.04 | 1 | 0.83 | 0.14     | 1     | 0.79 |
| rpsD                      | 30S riboso         | 0.91 | 0.06 | 1 | 1.16 | 0.21     | 1     | 1.25 |
| sanA                      | vancomycii         | 0.95 | 0.03 | 1 | 0.93 | 0.57     | 1     | 0.92 |
|                           | conserved          | 0.95 | 0.08 | 1 | 0.88 | 0.13     | 1     | 0.83 |
| hydH                      | two-compo          | 1.04 | 0.02 | 1 | 1.44 | 0.32     | 1     | 1.28 |
|                           | hypothetica        | 1.07 | 0.15 | 1 | 1.02 | 0.22 n/a |       | 1.02 |
| ptsP                      | phosphoen          | 1    | 0.04 | 1 | 1.12 | 0.31     | 1     | 1.16 |
| f antigens; secretory pr  |                    | 0.96 | 0.06 | 1 | 1.02 | 0.28 n/a |       | 1.03 |
| phsA                      | thiosulfate        | 0.96 | 0.04 | 1 | 0.77 | 0.25     | 1     | 0.88 |
|                           | conserved          | 0.95 | 0.05 | 1 | 1.05 | 0.34     | 1     | 1.14 |
|                           | conserved          | 1.05 | 0.08 | 1 | 1.14 | 0.16     | 1     | 1.12 |
|                           | possible cc        | 1.02 | 0.08 | 1 | 1.1  | 0.33     | 1     | 0.82 |
| lspA                      | lipoprotein        | 0.88 | 0.1  | 1 | 1.19 | 0.2      | 1     | 1.07 |
|                           | hypothetica        | 0.92 | 0.19 | 0 | 1.72 | 0.48     | 0     | 0.81 |
|                           | hypothetica        | 0.92 | 0.06 | 1 | 0.78 | 0.09     | 1     | 0.67 |
| yihP                      | putative me        | 0.95 | 0.06 | 1 | 1.42 | 0.18     | 1     | 1.27 |
| mntH                      | manganese          | 0.91 | 0.06 | 1 | 0.96 | 0.07     | 1     | 0.94 |



|              |              |      |      |   |      |      |   |      |
|--------------|--------------|------|------|---|------|------|---|------|
| mglA         |              | 1.05 | 0.08 | 1 | 0.86 | 0.08 | 1 | 0.92 |
|              | conserved    | 0.98 | 0.05 | 1 | 0.81 | 0.12 | 1 | 0.8  |
| narH         | respiratory  | 0.9  | 0.08 | 1 | 0.77 | 0.11 | 1 | 0.75 |
|              | conserved    | 0.88 | 0.06 | 1 | 0.76 | 0.11 | 1 | 0.79 |
|              | possible re  | 0.92 | 0.05 | 1 | 1.05 | 0.13 | 1 | 1.1  |
| ygcZ         | probable gl  | 1.03 | 0.05 | 1 | 1.09 | 0.21 | 1 | 1.03 |
|              | possible ox  | 0.97 | 0.07 | 1 | 1.04 | 0.14 | 1 | 1.14 |
| pepQ         | proline dipe | 0.94 | 0.06 | 1 | 1.34 | 0.24 | 1 | 1.25 |
| asd          | aspartate-s  | 0.99 | 0.07 | 1 | 1.21 | 0.15 | 1 | 1.16 |
| surA         | survival pro | 1    | 0.08 | 1 | 1.29 | 0.18 | 1 | 1.01 |
| rffG         | UDP-N-ace    | 0.92 | 0.03 | 1 | 1.37 | 0.15 | 1 | 1.26 |
| ilvE         | branched-c   | 0.98 | 0.07 | 1 | 1.58 | 0.41 | 1 | 1.18 |
| galU         | glucose-1-p  | 1.06 | 0.1  | 1 | 0.73 | 0.14 | 1 | 0.76 |
| rpoB         | DNA-direct   | 0.83 | 0.05 | 1 | 1.27 | 0.31 | 1 | 1.46 |
|              | conserved    | 0.93 | 0.07 | 1 | 0.82 | 0.05 | 1 | 0.8  |
| araB         | L-ribulokin  | 0.86 | 0.05 | 1 | 1.17 | 0.15 | 1 | 0.97 |
| oppB         | oligopeptid  | 0.89 | 0.08 | 1 | 0.76 | 0.09 | 1 | 0.75 |
| bgIX         | periplasmic  | 0.96 | 0.08 | 1 | 0.89 | 0.12 | 1 | 0.84 |
| rotein       |              | 0.89 | 0.05 | 1 | 1.28 | 0.16 | 1 | 1.2  |
| entB         | isochorism   | 0.89 | 0.06 | 1 | 1.02 | 0.13 | 1 | 0.74 |
| pgpB         | phosphatid   | 1.15 | 0.09 | 1 | 0.75 | 0.16 | 1 | 0.72 |
|              |              | 0.91 | 0.11 | 1 | 0.73 | 0.07 | 1 | 0.77 |
| ne protein   |              | 0.69 | 0.06 | 1 | 0.77 | 0.16 | 1 | n/a  |
|              | putative ex  | 0.92 | 0.07 | 1 | 0.74 | 0.06 | 1 | 0.76 |
|              | putative ch  | 0.97 | 0.06 | 1 | 0.73 | 0.07 | 1 | 0.77 |
|              | hypothetica  | 1.08 | 0.13 | 1 | 0.68 | 0.16 | 1 | 0.79 |
| aes          | acetyl ester | 1.01 | 0.05 | 1 | 0.99 | 0.23 | 1 | 0.94 |
| citE         | citrate lyas | 0.99 | 0.06 | 1 | 0.97 | 0.23 | 1 | 0.89 |
| yicJ         | sodium:gal   | 0.97 | 0.04 | 1 | 1.36 | 0.14 | 1 | 1.18 |
|              | conserved    | 1.08 | 0.12 | 1 | 0.83 | 0.13 | 1 | 0.78 |
|              | putative pro | 1.02 | 0.1  | 1 | 0.79 | 0.11 | 1 | 0.71 |
|              | putative lip | 0.96 | 0.03 | 1 | 0.74 | 0.11 | 1 | 0.69 |
|              | putative se  | 0.91 | 0.1  | 1 | 0.63 | 0.13 | 1 | 0.78 |
| srfA         | putative vir | 0.92 | 0.08 | 1 | 0.68 | 0.15 | 1 | 0.69 |
| aac          | aminoglycc   | 0.99 | 0.11 | 1 | 0.73 | 0.12 | 1 | 0.78 |
| purT         | phosphorib   | 0.95 | 0.06 | 1 | 0.83 | 0.1  | 1 | 0.87 |
|              | conserved    | 0.95 | 0.04 | 1 | 0.71 | 0.1  | 1 | 0.74 |
|              | conserved    | 0.99 | 0.11 | 1 | 0.79 | 0.11 | 1 | 0.79 |
| ffh          | signal reco  | 0.93 | 0.07 | 1 | 1.06 | 0.26 | 1 | 1.06 |
|              | outer mem    | 1.21 | 0.12 | 1 | 1.2  | 0.09 | 1 | 1.21 |
| ehydrogenase |              | 0.08 | 0.02 | 1 | 1.13 | 0.07 | 1 | n/a  |
| thiJ         | 4-methyl-5i  | 0.99 | 0.08 | 1 | 1.12 | 0.11 | 1 | 0.9  |
|              | conserved    | 0.95 | 0.06 | 1 | 1.07 | 0.27 | 1 | 0.79 |
| ne protein   |              | 0.12 | 0.02 | 1 | 1.25 | 0.15 | 1 | n/a  |
|              | conserved    | 1.04 | 0.03 | 1 | 1.2  | 0.17 | 1 | 1.1  |
| mtlA         | mannitol-sp  | 0.95 | 0.05 | 1 | 1.32 | 0.17 | 1 | 1.17 |
|              |              | 0.95 | 0.16 | 1 | 1.26 | 0.21 | 1 | 1.37 |
| fucl         | L-fuculose   | 0.91 | 0.07 | 1 | 1.05 | 0.09 | 1 | 1.16 |
|              | hypothetica  | 1.05 | 0.08 | 1 | 1.21 | 0.11 | 1 | 1.11 |
|              | possible Af  | 0.97 | 0.04 | 1 | 1.1  | 0.09 | 1 | 1.12 |
| treF         | cytoplasmic  | 0.91 | 0.06 | 1 | 1.27 | 0.19 | 1 | 1.18 |
|              | possible ox  | 0.95 | 0.02 | 1 | 1.1  | 0.17 | 1 | 1.16 |

|                         |              |           |      |      |      |      |      |      |
|-------------------------|--------------|-----------|------|------|------|------|------|------|
| lctR                    | putative L-l | 0.86      | 0.07 | 1    | 1.28 | 0.25 | 1    | 1.31 |
|                         |              | 0.98      | 0.1  | 1    | 1.39 | 0.17 | 1    | 1.29 |
|                         |              | conserved | 0.85 | 0.04 | 1    | 1.12 | 0.08 | 1    |
| yehV                    | putative tra | 0.99      | 0.08 | 1    | 1.01 | 0.08 | 1    | 0.92 |
| rfbP                    | undecaprei   | 0.99      | 0.07 | 1    | 0.88 | 0.08 | 1    | 0.89 |
| wcaB                    | putative ac  | 1.01      | 0.1  | 1    | 0.83 | 0.14 | 1    | 0.75 |
| yohD                    | putative me  | 0.87      | 0.08 | 1    | 0.91 | 0.17 | 1    | 0.83 |
| smg                     | conserved    | 1.02      | 0.06 | 1    | 1.11 | 0.33 | 1    | 1.07 |
| yhjC                    | hypothetica  | 0.89      | 0.05 | 1    | 1.29 | 0.17 | 1    | 1.23 |
|                         | conserved    | 0.99      | 0.09 | 1    | 0.8  | 0.08 | 1    | 0.86 |
| yiaE                    | putative 2-l | 0.99      | 0.09 | 1    | 1.3  | 0.35 | 1    | 1.31 |
|                         | putative me  | 1.08      | 0.08 | 1    | 1.23 | 0.2  | 1    | 1.21 |
| mtgA                    | monofuncti   | 1.02      | 0.13 | 1    | 1.15 | 0.09 | 1    | 1.15 |
|                         | putative inr | 0.96      | 0.03 | 1    | 1.18 | 0.07 | 1    | 1.05 |
| yjdC                    | putative tra | 0.99      | 0.05 | 1    | 1.33 | 0.16 | 1    | 1.24 |
|                         | possible ar  | 0.95      | 0.04 | 1    | 1.19 | 0.21 | 1    | 1.18 |
| tdcB                    | catabolic th | 1.04      | 0.1  | 1    | 1.2  | 0.2  | 1    | 1.32 |
| hybD                    | hydrogenas   | 0.96      | 0.05 | 1    | 1.16 | 0.22 | 1    | 1.04 |
| srlD                    | sorbitol-6-p | 0.98      | 0.05 | 1    | 0.98 | 0.14 | 1    | 0.91 |
| ft                      |              | 0.4       | 0.06 | 1    | 0.91 | 0.13 | 1    | n/a  |
|                         | putative DN  | 0.89      | 0.16 | 1    | 1    | 0.2  | n/a  | 0.95 |
|                         |              | 1.02      | 0.05 | 1    | 0.8  | 0.08 | 1    | 0.79 |
| nbly protein            |              | 0.12      | 0.03 | 1    | 1.11 | 0.16 | 1    | n/a  |
| fruK                    | 1-phosphol   | 1.02      | 0.03 | 1    | 0.96 | 0.05 | 1    | 0.87 |
| yrdD                    | conserved    | 0.98      | 0.09 | 1    | 1.27 | 0.1  | 1    | 1.13 |
| rpsC                    | 30S ribosol  | 1.03      | 0.09 | 1    | 1.27 | 0.13 | 1    | 1.33 |
|                         | hypothetica  | 1.18      | 0.13 | 1    | 1.12 | 0.22 | 1    | 1.25 |
| nfsA                    | oxygen-ins   | 1.04      | 0.07 | 1    | 0.94 | 0.09 | 1    | 0.79 |
|                         | putative me  | 0.94      | 0.05 | 1    | 1.14 | 0.07 | 1    | 1.22 |
| galP                    | galactose-p  | 0.99      | 0.1  | 1    | 1.13 | 0.15 | 1    | 1.15 |
|                         | conserved    | 1.13      | 0.12 | 1    | 0.83 | 0.12 | 1    | 0.8  |
| moaC                    | molybdenu    | 0.84      | 0.09 | 1    | 0.91 | 0.07 | 1    | 0.77 |
| yliC                    | hypothetica  | 1.01      | 0.02 | 1    | 0.88 | 0.11 | 1    | 0.69 |
| sigD                    | cell invasio | 0.91      | 0.03 | 1    | 0.89 | 0.16 | 1    | 0.8  |
| tolQ                    | TolQ protei  | 0.97      | 0.07 | 1    | 0.95 | 0.11 | 1    | 0.78 |
| bioB                    | biotin synth | 1.01      | 0.07 | 1    | 0.92 | 0.17 | 1    | 0.81 |
|                         | conserved    | 0.81      | 0.05 | 1    | 1    | 0.07 | 1    | 0.77 |
| gltD                    | glutamate s  | 0.96      | 0.03 | 1    | 1.17 | 0.14 | 1    | 1.16 |
| misL                    |              | 0.9       | 0.05 | 1    | 1.37 | 0.26 | 1    | 1.44 |
| yfiA                    | putative sig | 1         | 0.06 | 1    | 1.02 | 0.16 | 1    | 1.14 |
|                         | phosphohis   | 0.97      | 0.05 | 1    | 1.01 | 0.06 | 1    | 0.94 |
|                         | conserved    | 1.07      | 0.06 | 1    | 1.24 | 0.04 | 1    | 1.26 |
| rpoA                    | DNA-direct   | 0.97      | 0.05 | 1    | 1.15 | 0.15 | 1    | 1.2  |
| sapA                    | peptide tra  | 1.03      | 0.06 | 1    | 0.72 | 0.07 | 1    | 0.65 |
| glnK                    | nitrogen re  | 1.05      | 0.1  | 1    | 1    | 0.12 | 1    | 0.9  |
|                         | putative DN  | 1.03      | 0.08 | 1    | 1.54 | 0.17 | 1    | 1.36 |
|                         | galactosyltr | 1.11      | 0.17 | 1    | 1.01 | 0.21 | 1    | 0.82 |
| rboxypeptidase (penicil | hypothetica  | 1.05      | 0.1  | 1    | 1.44 | 0.28 | 1    | 1.45 |
|                         |              | 0.27      | 0.05 | 1    | 0.97 | 0.11 | 1    | n/a  |
|                         |              | 0.16      | 0.05 | 1    | 0.95 | 0.1  | n/a  | n/a  |
| ε translocase           |              | 0.14      | 0.02 | 1    | 1.37 | 0.18 | 1    | n/a  |
| ar to gpP, ATP chargin  |              | 1.27      | 0.08 | 1    | 1.02 | 0.17 | 1    | 1.05 |

|                            |               |       |      |       |      |          |       |      |
|----------------------------|---------------|-------|------|-------|------|----------|-------|------|
| yebG                       | conserved     | 0.87  | 0.05 | 1     | 0.71 | 0.08     | 1     | 0.73 |
| ar to protein from phage   |               | 1.33  | 0.12 | 1     | 1.07 | 0.09 n/a | n/a   |      |
| ar to protein in phage 1   |               | 0.5   | 0.05 | 1     | 1.07 | 0.09     | 1 n/a |      |
| yjiU                       | conserved     | 1.1   | 0.13 | 1     | 1.39 | 0.14     | 1     | 1.24 |
|                            | conserved     | 0.99  | 0.04 | 1     | 1.17 | 0.11     | 1     | 1.14 |
| lppB                       | major outer   | 0.85  | 0.04 | 1     | 0.86 | 0.14     | 1     | 0.91 |
|                            | conserved     | 1.06  | 0.07 | 1     | 0.75 | 0.1      | 1     | 0.74 |
| ydhA                       | putative lipi | 0.92  | 0.08 | 1     | 0.76 | 0.07     | 1     | 0.83 |
|                            | conserved     | 1.06  | 0.04 | 1     | 0.89 | 0.13     | 1     | 0.74 |
| eutN                       | putative etf  | 1.17  | 0.11 | 1     | 0.91 | 0.03     | 1     | 0.89 |
|                            | conserved     | 0.96  | 0.05 | 1     | 1.04 | 0.05     | 1     | 0.75 |
|                            | hypothetica   | 0.74  | 0.17 | 0     | 1.2  | 0.2      | 0     | 1.07 |
|                            | conserved     | 0.86  | 0.11 | 1     | 0.9  | 0.14     | 1     | 0.96 |
|                            | putative me   | 1.1   | 0.14 | 1     | 0.73 | 0.16     | 1     | 0.83 |
|                            | putative ca   | 1.02  | 0.12 | 1     | 0.78 | 0.08     | 1     | 0.87 |
|                            | putative se   | 0.73  | 0.06 | 1     | 0.76 | 0.08     | 1     | 0.64 |
|                            | hypothetica   | 1.04  | 0.08 | 0     | 1.29 | 0.23     | 0     | 0.87 |
| ft relative to E.coli hypc |               | 0.1   | 0.01 | 1     | 0.7  | 0.09 n/a | n/a   |      |
| ggregate stability         |               | 0.03  | 0.01 | 1     | 0.68 | 0.14 n/a | n/a   |      |
| stop                       |               | 0.06  | 0.01 | 1     | 0.76 | 0.09 n/a | n/a   |      |
|                            |               | 0.07  | 0.01 | 1     | 0.67 | 0.09 n/a | n/a   |      |
|                            |               | 0.09  | 0.02 | 1     | 0.79 | 0.08 n/a | n/a   |      |
|                            |               | 0.05  | 0.01 | 1     | 0.7  | 0.08 n/a | n/a   |      |
|                            | n/a           | n/a   | n/a  | n/a   | n/a  | n/a      | n/a   |      |
|                            | n/a           | n/a   | n/a  | n/a   | n/a  | n/a      | n/a   |      |
|                            | n/a           | n/a   | n/a  | n/a   | n/a  | n/a      | n/a   |      |
|                            | n/a           | n/a   | n/a  | n/a   | n/a  | n/a      | n/a   |      |
|                            | n/a           | n/a   | n/a  | n/a   | n/a  | n/a      | n/a   |      |
|                            | n/a           | n/a   | n/a  | n/a   | n/a  | n/a      | n/a   |      |
|                            |               | 0.98  | 0.08 | 1     | 1.04 | 0.15 n/a |       | 0.94 |
|                            |               | 0.21  | 0.01 | 1     | 1.07 | 0.12 n/a | n/a   |      |
|                            |               | 1     | 0.06 | 1     | 1.03 | 0.15 n/a |       | 0.86 |
|                            |               | 0.11  | 0.03 | 1     | 1.03 | 0.12 n/a | n/a   |      |
|                            |               | 0.19  | 0.03 | 1     | 0.86 | 0.14     | 1 n/a |      |
|                            |               | 1.05  | 0.12 | 1     | 1.25 | 0.28 n/a |       | 1.03 |
|                            | conserved     | 11.91 | 9.63 | 1 n/a | n/a  | n/a      |       | 1.06 |
|                            | hypothetica   | 19.76 | 6.05 | 1 n/a | n/a  | n/a      |       | 0.87 |
|                            | putative ex   | 8.37  | 1.1  | 1 n/a | n/a  | n/a      |       | 0.89 |
|                            | major caps    | 2.84  | 0.15 | 1     | 1.11 | 0.15 n/a |       | 1.12 |
|                            | conserved     | 7.26  | 1.05 | 1 n/a | n/a  | n/a      |       | 1.22 |
|                            | hypothetica   | 9.91  | 1.3  | 1 n/a | n/a  | n/a      |       | 1.25 |
|                            | putative me   | 13.75 | 2.49 | 1 n/a | n/a  | n/a      |       | 1.11 |
|                            | hypothetica   | 6.59  | 0.87 | 1 n/a | n/a  | n/a      |       | 1.24 |
|                            | putative ca   | 2.61  | 0.32 | 1 n/a | n/a  | n/a      |       | 1.22 |
|                            |               | 4.79  | 0.41 | 1 n/a | n/a  | n/a      |       | 1.06 |
|                            | putative DN   | 1.63  | 0.12 | 1     | 1.36 | 0.07 n/a |       | 1.23 |
| rspB                       | starvation s  | 1.16  | 0.07 | 1     | 0.69 | 0.07 n/a |       | 0.73 |
|                            | hypothetica   | 5.09  | 0.43 | 1 n/a | n/a  | n/a      |       | 1.44 |
|                            | hypothetica   | 7.17  | 3.52 | 1 n/a | n/a  | n/a      |       | 1.29 |
|                            | phage base    | 5.05  | 0.96 | 1 n/a | n/a  | n/a      |       | 1.12 |
| stgB                       | fimbrial cha  | 7.77  | 3.08 | 1 n/a | n/a  | n/a      |       | 1.23 |
|                            | hypothetica   | 3.91  | 1.61 | 1 n/a | n/a  | n/a      |       | 0.88 |

|                          |              |       |       |   |     |      |      |      |
|--------------------------|--------------|-------|-------|---|-----|------|------|------|
| tcfB                     | putative fir | 12.3  | 4.89  | 1 | n/a | n/a  | n/a  | 0.94 |
|                          | terminase,   | 2.44  | 0.16  | 1 |     | 1.12 | 0.16 | n/a  |
|                          | putative ba  | 7.75  | 2.51  | 1 | n/a | n/a  | n/a  | 0.97 |
|                          | hypothetica  | 11.88 | 4.86  | 1 | n/a | n/a  | n/a  | 1.09 |
|                          | putative me  | 1.88  | 0.27  | 1 |     | 1.11 | 0.15 | n/a  |
| tcfD                     | putative fir | 15.91 | 11.86 | 1 | n/a | n/a  | n/a  | 0.86 |
| exo                      | exonucleas   | 11.6  | 3.65  | 1 | n/a | n/a  | n/a  | 0.79 |
|                          |              | 1.1   | 0.09  | 1 |     | 1.47 | 0.19 | n/a  |
| pilS                     | deoR famil   | 5.7   | 1.17  | 1 | n/a | n/a  | n/a  | 1.13 |
|                          | prepilin     | 14.43 | 2.69  | 1 | n/a | n/a  | n/a  | 0.97 |
|                          | protein kin  | 16.49 | 1.49  | 1 | n/a | n/a  | n/a  | 1.03 |
| glyQ                     | putative ge  | 0.87  | 0.04  | 1 |     | 0.72 | 0.11 | n/a  |
|                          | glycine-tRN  | 1.15  | 0.05  | 1 |     | 1.43 | 0.09 | n/a  |
|                          | hypothetica  | 16.27 | 0.46  | 1 | n/a | n/a  | n/a  | 1.34 |
|                          | putative me  | 4.91  | 1.6   | 1 | n/a | n/a  | n/a  | 1.35 |
|                          | hypothetica  | 1.95  | 0.18  | 1 |     | 1.15 | 0.06 | n/a  |
| sefB                     | hypothetica  | 1.75  | 0.21  | 1 | n/a | n/a  | n/a  | 1.11 |
|                          | hypothetica  | 1.63  | 0.15  | 1 | n/a | n/a  | n/a  | 1.17 |
|                          | fimbrial cha | 9.29  | 5.85  | 1 | n/a | n/a  | n/a  | 1.21 |
|                          | conserved    | 1.07  | 0.1   | 1 |     | 1.19 | 0.32 | 1    |
| yhdE                     | conserved    | 0.12  | 0.02  | 1 |     | 0.9  | 0.11 | 1    |
| rotein                   |              | 1     | 0.13  | 1 |     | 0.93 | 0.22 | 1    |
|                          | conserved    | 1     | 0.13  | 1 |     | 0.93 | 0.22 | 1    |
| torA                     | trimethylar  | 1.03  | 0.06  | 1 |     | 1.38 | 0.09 | 1    |
| rane protein, possible t |              | 0.18  | 0.03  | 1 |     | 1.06 | 0.09 | 1    |
| cbiO                     | putative co  | 0.94  | 0.12  | 1 |     | 0.88 | 0.1  | 1    |
|                          | putative Ly  | 0.96  | 0.07  | 1 |     | 1.22 | 0.15 | 1    |
| pstS                     | periplasmic  | 1.07  | 0.07  | 1 |     | 1.31 | 0.27 | 1    |
| uhpT                     | hexosepho    | 1     | 0.13  | 1 |     | 1.33 | 0.2  | 1    |
| yaaU                     | putative me  | 0.92  | 0.12  | 1 |     | 1.08 | 0.09 | 1    |
| murC                     | UDP-N-ace    | 1.05  | 0.11  | 1 |     | 1.11 | 0.18 | 1    |
|                          | PdxA-like p  | 1.01  | 0.18  | 1 |     | 1    | 0.15 | 1    |
| yabC                     | conserved    | 1.07  | 0.13  | 1 |     | 1.18 | 0.21 | 1    |
| rplM                     | 50S riboso   | 0.99  | 0.15  | 1 |     | 1.04 | 0.22 | 1    |
| accC                     | biotin carb  | 1.02  | 0.09  | 1 |     | 1.09 | 0.14 | 1    |
| cobD                     | putative an  | 1.03  | 0.12  | 1 |     | 0.9  | 0.12 | 1    |
| ybeJ                     | ABC transp   | 1.17  | 0.16  | 1 |     | 0.92 | 0.18 | 1    |
| pgm                      | phosphogl    | 1.03  | 0.18  | 1 |     | 0.91 | 0.08 | 1    |
| fabZ                     | (3R)-hydro   | 0.97  | 0.15  | 1 |     | 1.04 | 0.18 | 1    |
|                          | conserved    | 1.02  | 0.11  | 1 |     | 0.84 | 0.22 | 0    |
| galF                     | UTP-gluco    | 0.9   | 0.1   | 1 |     | 0.77 | 0.1  | 1    |
| yegD                     | conserved    | 0.96  | 0.09  | 1 |     | 0.89 | 0.17 | 1    |
| yafB                     | hypothetica  | 1.02  | 0.14  | 1 |     | 1.14 | 0.6  | 1    |
| safB                     | periplasmic  | 0.85  | 0.13  | 1 |     | 1.05 | 0.17 | 1    |
| yegB                     | putative tra | 1     | 0.17  | 1 |     | 0.9  | 0.22 | 1    |
|                          | putative ph  | 1.36  | 0.22  | 1 |     | 0.95 | 0.24 | 1    |
| III glucitol             |              | 0.12  | 0.06  | 1 |     | 1.12 | 0.19 | 1    |
| DNA and RNA helicase     |              | 0.15  | 0.03  | 1 |     | 1.1  | 0.26 | 1    |
| ygaU                     |              | 1.09  | 0.06  | 1 |     | 1.03 | 0.15 | 1    |
| hpaB                     | 4-hydroxyp   | 0.94  | 0.17  | 1 |     | 0.98 | 0.52 | 1    |
| ne protein               |              | 0.12  | 0.03  | 1 |     | 0.99 | 1.31 | 1    |
|                          |              | 0.81  | 0.13  | 1 |     | 1.02 | 0.25 | 1    |
| ne protein               |              | 0.84  | 0.15  | 0 |     | 1.2  | 0.5  | 0    |

|            |               |      |      |   |      |      |     |      |
|------------|---------------|------|------|---|------|------|-----|------|
| rpmJ       | 50S ribosom   | 0.98 | 0.24 | 0 | 1.16 | 0.39 | 0   | 1.05 |
| crp        | cyclic AMP    | 0.99 | 0.11 | 1 | 1.22 | 0.3  | 1   | 1.37 |
| yhgE       | putative me   | 1.05 | 0.08 | 1 | 1.15 | 0.12 | 1   | 1.09 |
| pipD       | putative se   | 1.09 | 0.07 | 1 | 0.8  | 0.14 | 1   | 0.76 |
|            | putative tra  | 0.99 | 0.09 | 1 | 0.88 | 0.22 | 1   | 0.83 |
|            | conserved     | 1.05 | 0.15 | 1 | 1.13 | 0.4  | 0   | 0.81 |
|            | putative lipi | 0.96 | 0.11 | 1 | 0.77 | 0.2  | 1   | 0.74 |
|            | putative ba   | 1    | 0.11 | 1 | 1.01 | 0.35 | 1   | 0.93 |
|            | putative me   | 1.17 | 0.21 | 1 | 0.93 | 0.26 | 1   | 0.82 |
| cmk        | cytidylate k  | 1.01 | 0.03 | 1 | 0.98 | 0.15 | 1   | 0.84 |
| able major | tail protein  | 0.09 | 0.02 | 1 | 0.77 | 0.09 | 1   | n/a  |
| tein       |               | 0.11 | 0.01 | 1 | 1.25 | 0.2  | 1   | n/a  |
| qor        | quinone ox    | 1.07 | 0.12 | 1 | 1.17 | 0.31 | 1   | 1.29 |
| nrfG       | NrfG protei   | 1.08 | 0.1  | 1 | 1.28 | 0.14 | 1   | 1.11 |
|            | conserved     | 1.15 | 0.13 | 1 | 1    | 0.08 | 1   | 1.13 |
|            | putative lipi | 1.04 | 0.16 | 1 | 1.21 | 0.1  | 1   | 1.33 |
|            | lysR family   | 0.99 | 0.16 | 1 | 1.13 | 0.16 | 1   | 1.25 |
| dmsB       |               | 1.09 | 0.13 | 1 | 1.06 | 0.16 | 1   | 1.21 |
| fabB       | 3-oxoacyl-]   | 1.1  | 0.05 | 1 | 0.87 | 0.11 | 1   | 0.95 |
| pdxK       | pyridoxine    | 0.92 | 0.17 | 1 | 0.89 | 0.14 | 1   | 0.93 |
| tive Cu/Zn | superoxide c  | 0.16 | 0.03 | 1 | 0.94 | 0.2  | 1   | n/a  |
| fdhE       | FdhE prote    | 0.95 | 0.05 | 1 | 1.36 | 0.15 | 1   | 1.54 |
| rotein     |               | 0.09 | 0.03 | 1 | 1.21 | 0.13 | 1   | n/a  |
| plsB       | glycerol-3-φ  | 0.91 | 0.1  | 1 | 1.3  | 0.26 | 1   | 1.26 |
|            | possible Ly   | 0.91 | 0.07 | 1 | 1.16 | 0.11 | 1   | 1.13 |
|            | Similar to h  | 0.83 | 0.12 | 1 | 1.12 | 0.27 | 1   | 1.13 |
|            |               | 0.08 | 0.02 | 1 | 0.89 | 0.35 | 1   | n/a  |
| celD       | putative ce   | 1.1  | 0.11 | 1 | 0.78 | 0.08 | 1   | 0.84 |
| eutD       | putative ph   | 0.99 | 0.08 | 1 | 0.92 | 0.2  | 1   | 0.99 |
| purB       | adenylosuc    | 0.95 | 0.21 | 1 | 0.77 | 0.13 | 1   | 0.79 |
|            | putative se   | 1.04 | 0.14 | 1 | 0.75 | 0.08 | 1   | 0.83 |
|            | putative ex   | 1.02 | 0.12 | 1 | 1.18 | 0.44 | 1   | 0.97 |
| napB       | cytochrome    | 1.2  | 0.1  | 1 | 0.79 | 0.15 | 1   | 0.76 |
|            |               | 0.1  | 0.04 | 1 | 1.1  | 0.15 | 1   | n/a  |
|            | hypothetica   | 1.07 | 0.12 | 1 | 1.15 | 0.07 | 1   | 1.15 |
| nuoI       | NADH dehy     | 1.08 | 0.18 | 1 | 0.91 | 0.19 | 1   | 0.94 |
|            | putative glu  | 1.02 | 0.09 | 1 | 0.91 | 0.11 | 1   | 0.88 |
| fliZ       | FliZ protein  | 1.17 | 0.12 | 1 | 0.76 | 0.13 | 1   | 0.88 |
| membrane   | usher         | 0.12 | 0.01 | 1 | 1    | 0.13 | 1   | n/a  |
| yecG       | conserved     | 1.1  | 0.09 | 1 | 0.83 | 0.08 | 1   | 0.96 |
| astE       | succinylglu   | 1.11 | 0.13 | 1 | 0.82 | 0.17 | 1   | 0.77 |
| pdxH       | pyridoxami    | 1.03 | 0.15 | 1 | 0.78 | 0.16 | 1   | 0.82 |
| cdh        | CDP-diglyc    | 1.05 | 0.07 | 1 | 1.36 | 0.23 | 1   | 1.38 |
| sitC       | Iron transp   | 0.93 | 0.1  | 1 | 1.11 | 0.18 | 1   | 1.24 |
|            | putative pro  | 1.1  | 0.08 | 1 | 0.77 | 0.17 | 1   | 0.75 |
| shdA       |               | 0.58 | 0.05 | 1 | 0.99 | 0.15 | 1   | 0.98 |
|            | conserved     | 1.14 | 0.15 | 1 | 0.91 | 0.21 | 1   | 0.72 |
| ydgQ       | conserved     | 0.97 | 0.17 | 1 | 0.77 | 0.07 | 1   | 0.77 |
| purR       | purine nucl   | 1.03 | 0.11 | 1 | 0.81 | 0.2  | 1   | 0.81 |
|            | putative AE   | 1.13 | 0.12 | 1 | 0.7  | 0.15 | 1   | 0.84 |
| orgAb      | oxygen-reg    | 0.97 | 0.14 | 1 | 0.99 | 0.13 | n/a | 1.26 |
| rnt        | ribonucleas   | 0.99 | 0.13 | 1 | 0.97 | 0.37 | 1   | 0.84 |

|             |               |      |      |   |      |      |     |      |
|-------------|---------------|------|------|---|------|------|-----|------|
|             | putative co   | 1.12 | 0.12 | 1 | 0.91 | 0.4  | 1   | 0.78 |
| putative O- | antigen trar  | 0.25 | 0.03 | 1 | 0.84 | 0.14 | 1   | n/a  |
| dsdC        | D-serine de   | 1    | 0.09 | 1 | 1.47 | 0.14 | 1   | 1.39 |
| ung         | uracil-DNA    | 1.13 | 0.13 | 1 | 1.03 | 0.21 | 1   | 1.08 |
| phoB        | phosphate     | 1.14 | 0.07 | 1 | 1    | 0.28 | 1   | 1.01 |
| yaeC        | putative lipi | 0.99 | 0.12 | 1 | 1.09 | 0.21 | 1   | 0.9  |
|             | hypothetica   | 1.12 | 0.11 | 1 | 1.26 | 0.53 | 0   | 1.1  |
| caiD        | carnitine ra  | 0.86 | 0.1  | 1 | 1.13 | 0.36 | 1   | 1.09 |
| sdiA        | cell-divisio  | 1    | 0.1  | 1 | 0.77 | 0.07 | 1   | 0.83 |
| tyrR        | transcriptio  | 1.09 | 0.08 | 1 | 0.7  | 0.07 | 1   | 0.82 |
| livH        | high-affinity | 0.97 | 0.11 | 1 | 1.24 | 0.18 | 1   | 1.09 |
|             | putative vo   | 1.07 | 0.1  | 1 | 0.78 | 0.09 | 1   | 0.7  |
|             | putative ca   | 1.01 | 0.09 | 1 | 1.31 | 0.15 | 1   | 1.3  |
| mod         | type III rest | 0.99 | 0.13 | 1 | 1.01 | 0.07 | 1   | 0.97 |
| ribD        | riboflavin b  | 0.99 | 0.14 | 1 | 1.1  | 0.06 | 1   | 0.93 |
| ubiC        | chorismate    | 1.05 | 0.08 | 1 | 1.23 | 0.18 | 1   | 1.25 |
| polB        | DNA polym     | 0.95 | 0.1  | 1 | 1.03 | 0.15 | 1   | 1.14 |
|             |               | 1.2  | 0.13 | 1 | 0.99 | 0.06 | 1   | 1.14 |
| trpS        | tryptophan    | 1.03 | 0.16 | 1 | 1.07 | 0.14 | 1   | 1.3  |
|             | hypothetica   | 0.99 | 0.2  | 1 | 0.88 | 0.29 | 1   | 0.98 |
| cysW        | sulphate tra  | 1.02 | 0.05 | 1 | 0.86 | 0.14 | 1   | 0.9  |
| ybbA        | hypothetica   | 1.1  | 0.13 | 1 | 0.94 | 0.14 | 1   | 0.83 |
|             | conserved     | 0.99 | 0.19 | 1 | 0.99 | 0.13 | 1   | 0.98 |
|             | putative ac   | 0.95 | 0.11 | 1 | 1.06 | 0.09 | 1   | 1.12 |
| cca         | tRNA nucle    | 0.92 | 0.1  | 1 | 1.15 | 0.14 | 1   | 1.15 |
| garR        | 2-hydroxy-    | 1.07 | 0.1  | 1 | 1.11 | 0.1  | 1   | 1.32 |
|             | possible m    | 0.85 | 0.03 | 1 | 1.32 | 0.28 | 1   | 1.3  |
| chment and  | invasion pr   | 0.15 | 0.02 | 1 | 0.81 | 0.16 | 1   | n/a  |
|             | putative DN   | 0.54 | 0.09 | 1 | 0.93 | 0.3  | n/a | 0.82 |
|             | putative an   | 1.03 | 0.05 | 1 | 1.05 | 0.11 | 1   | 1.15 |
|             | putative me   | 0.91 | 0.17 | 1 | 0.9  | 0.08 | 1   | 1.05 |
| purK        | phosphorib    | 1.04 | 0.06 | 1 | 0.95 | 0.06 | 1   | 0.79 |
|             |               | 0.19 | 0.08 | 1 | 1.11 | 0.35 | 0   | n/a  |
|             | putative me   | 1.14 | 0.14 | 1 | 1.11 | 0.24 | 1   | 1.1  |
|             | putative gly  | 1.05 | 0.11 | 1 | 1.39 | 0.2  | 1   | 1.42 |
| hisQ        | histidine tra | 1.04 | 0.13 | 1 | 0.76 | 0.08 | 1   | 0.97 |
| dnaK        | DnaK prote    | 0.98 | 0.14 | 1 | 1.04 | 0.09 | 1   | 1.17 |
| trpE        | anthranilate  | 0.92 | 0.16 | 1 | 0.82 | 0.17 | 1   | 0.73 |
| proV        |               | 0.98 | 0.13 | 1 | 1.11 | 0.19 | 1   | 1.22 |
|             | conserved     | 1.14 | 0.08 | 1 | 1.19 | 0.22 | 1   | 1.51 |
| holA        | DNA polym     | 1.03 | 0.24 | 1 | 0.97 | 0.25 | 1   | 0.88 |
| eutJ        | putative etf  | 0.85 | 0.08 | 1 | 0.93 | 0.14 | 1   | 0.82 |
| oxyR        | hydrogen p    | 1.01 | 0.11 | 1 | 1.29 | 0.09 | 1   | 1.25 |
| modE        | putative mc   | 1.04 | 0.11 | 1 | 0.99 | 0.21 | 1   | 0.8  |
|             | ABC transp    | 1    | 0.11 | 1 | 1    | 0.16 | 1   | 0.78 |
| nrdI        | NrdI protei   | 0.96 | 0.12 | 1 | 1.18 | 0.51 | 0   | 1.05 |
| himA        | integration   | 1.07 | 0.18 | 1 | 0.81 | 0.11 | 1   | 0.89 |
| accB        | biotin carb   | 1.02 | 0.17 | 1 | 1.09 | 0.13 | 1   | 1.37 |
| citA        | sensor kin    | 0.97 | 0.4  | 1 | 1.07 | 0.19 | 1   | 1.07 |
|             | possible su   | 1.04 | 0.13 | 1 | 1.06 | 0.12 | 1   | 1.22 |
|             | hypothetica   | 1.06 | 0.25 | 0 | 1.26 | 0.71 | 0   | 0.71 |
|             | hypothetica   | 1.23 | 0.16 | 0 | 0.88 | 1.09 | 0   | 0.81 |

|                 |                |      |      |   |      |      |   |      |
|-----------------|----------------|------|------|---|------|------|---|------|
| atpH            | ATP synthase   | 1.02 | 0.12 | 1 | 1.3  | 0.32 | 1 | 1.69 |
| pduN            |                | 0.94 | 0.23 | 1 | 0.95 | 0.36 | 1 | 0.87 |
| dmsC            | putative dir   | 1.07 | 0.1  | 1 | 1.09 | 0.17 | 1 | 1    |
| argS            | arginyl-tRNA   | 1.05 | 0.15 | 1 | 0.79 | 0.13 | 1 | 0.87 |
|                 | probable L     | 1.08 | 0.18 | 1 | 1.13 | 0.09 | 1 | 1.3  |
| waal            | lipopolysac    | 0.9  | 0.11 | 1 | 1.25 | 0.58 | 1 | 1.39 |
| groES           | GroES prote    | 1.11 | 0.1  | 1 | 1.16 | 0.13 | 1 | 1.18 |
| csgE            | assembly/t     | 1.05 | 0.13 | 1 | 0.91 | 0.16 | 1 | 0.83 |
| yihW            | putative De    | 1.01 | 0.1  | 1 | 1.43 | 0.23 | 1 | 1.29 |
| hupA            | histone like   | 1.1  | 0.07 | 1 | 1.24 | 0.26 | 1 | 1.28 |
|                 | hypothetica    | 0.96 | 0.03 | 1 | 1.23 | 0.23 | 1 | 0.85 |
| pduH            | PduH prote     | 0.87 | 0.11 | 1 | 0.92 | 0.15 | 1 | 0.84 |
| adi             | arginine de    | 1.01 | 0.09 | 1 | 1.17 | 0.13 | 1 | 1.15 |
| yifE            | conserved      | 1.26 | 0.13 | 1 | 1.26 | 0.14 | 1 | 1.2  |
| fliS            | flagellar pr   | 0.99 | 0.07 | 1 | 0.98 | 0.23 | 0 | 0.8  |
| cysB            | cys regulor    | 1    | 0.13 | 1 | 0.69 | 0.36 | 1 | 0.66 |
| alr             | alanine rac    | 1.07 | 0.1  | 1 | 1.18 | 0.26 | 1 | 1.15 |
|                 | probable si    | 0.95 | 0.06 | 1 | 1.08 | 0.36 | 1 | 1.55 |
| phnS            | probable p     | 0.99 | 0.08 | 1 | 0.96 | 0.11 | 1 | 0.92 |
| tatD            | putative de    | 0.98 | 0.14 | 1 | 1.35 | 0.24 | 1 | 1.05 |
| rhtC            | threonine e    | 0.96 | 0.19 | 1 | 1.38 | 0.2  | 1 | 1.18 |
|                 | conserved      | 1.03 | 0.22 | 1 | 1.41 | 0.2  | 1 | 1.37 |
|                 | putative m     | 0.95 | 0.14 | 1 | 1.18 | 0.09 | 1 | 1    |
| yaaJ            | putative ar    | 1.04 | 0.15 | 1 | 1.06 | 0.06 | 1 | 1.09 |
| flgJ            | flagellar pr   | 1.12 | 0.13 | 1 | 0.79 | 0.13 | 1 | 0.66 |
| fliF            | flagellar ba   | 0.98 | 0.05 | 1 | 0.81 | 0.05 | 1 | 0.8  |
| cysJ            | sulfite redu   | 0.73 | 0.07 | 1 | 1.02 | 0.17 | 1 | 1.1  |
| ppdA            | prepilin pe    | 0.83 | 0.04 | 1 | 1.26 | 0.26 | 1 | 0.98 |
|                 | probable ai    | 0.89 | 0.1  | 1 | 1.13 | 0.17 | 1 | 1.16 |
| menG            | menaquino      | 1.11 | 0.09 | 1 | 1.29 | 0.15 | 1 | 1.15 |
| aarF            | ubiquinone     | 0.94 | 0.09 | 1 | 1.37 | 0.3  | 1 | 1.23 |
|                 | putative re    | 1.17 | 0.13 | 1 | 0.73 | 0.11 | 1 | 0.77 |
| pqaA            | hypothetica    | 1.03 | 0.17 | 1 | 0.66 | 0.28 | 1 | 0.71 |
| sfcA            | NAD-linker     | 1    | 0.14 | 1 | 0.68 | 0.11 | 1 | 0.73 |
|                 | putative hy    | 0.9  | 0.06 | 1 | 0.71 | 0.16 | 1 | 0.83 |
|                 |                | 0.93 | 0.1  | 1 | 0.72 | 0.07 | 1 | 0.82 |
| hexR            | putative he    | 1.05 | 0.07 | 1 | 0.77 | 0.19 | 1 | 0.92 |
| yecD            | putative hy    | 1    | 0.15 | 1 | 0.78 | 0.1  | 1 | 0.89 |
| tesA            | acyl-coA th    | 1.13 | 0.11 | 1 | 0.94 | 0.14 | 1 | 0.91 |
|                 | conserved      | 1.02 | 0.14 | 1 | 1.07 | 0.14 | 1 | 0.9  |
| sin, PTS system |                | 0.32 | 0.04 | 1 | 1.02 | 0.15 | 1 | n/a  |
| acpD            | acyl carrier   | 1.12 | 0.16 | 1 | 0.79 | 0.09 | 1 | 0.76 |
|                 | putative isc   | 0.94 | 0.14 | 1 | 0.62 | 0.14 | 1 | 0.76 |
|                 | conserved      | 1.06 | 0.1  | 1 | 0.75 | 0.08 | 1 | 0.75 |
| narX            | nitrate/nitrit | 0.96 | 0.09 | 1 | 0.75 | 0.1  | 1 | 0.75 |
| fadR            | fatty acid-fa  | 1    | 0.1  | 1 | 0.83 | 0.18 | 1 | 0.8  |
|                 | conserved      | 1.05 | 0.1  | 1 | 0.84 | 0.13 | 1 | 0.83 |
|                 | conserved      | 0.92 | 0.04 | 1 | 0.76 | 0.22 | 1 | 0.76 |
| priC            |                | 0.9  | 0.06 | 1 | 0.92 | 0.36 | 1 | 0.9  |
|                 | possible m     | 0.94 | 0.12 | 1 | 1.04 | 0.12 | 1 | 1.26 |
|                 | putative ty    | 0.99 | 0.09 | 1 | 1.03 | 0.08 | 1 | 1.13 |
|                 | conserved      | 0.96 | 0.06 | 1 | 1    | 0.05 | 1 | 1.13 |

|        |                        |      |      |   |      |      |     |      |
|--------|------------------------|------|------|---|------|------|-----|------|
| rdgC   | recombinat             | 1.02 | 0.1  | 1 | 1.08 | 0.12 | 1   | 0.92 |
|        | possible ar            | 1.03 | 0.12 | 1 | 1.05 | 0.14 | 1   | 1.17 |
| yfhD   | putative ex            | 1.08 | 0.1  | 1 | 0.94 | 0.2  | 1   | 1.09 |
| tctE   | putative tw            | 1.05 | 0.11 | 1 | 1.06 | 0.1  | 1   | 1.09 |
|        | probable A             | 1    | 0.06 | 1 | 1.07 | 0.12 | 1   | 1.15 |
|        | the HAD superfamily    | 0.28 | 0.06 | 1 | 0.92 | 0.08 | 1   | n/a  |
| yidF   | conserved              | 1.03 | 0.12 | 1 | 1.38 | 0.11 | 1   | 1.3  |
|        | putative lipi          | 0.92 | 0.13 | 1 | 1.08 | 0.12 | 1   | 1.03 |
|        | probable pl            | 0.43 | 0.16 | 1 | 0.92 | 0.18 | n/a | 0.91 |
| emrA   | multidrug ri           | 0.96 | 0.12 | 1 | 1.18 | 0.11 | 1   | 1.05 |
|        | conserved              | 0.82 | 0.06 | 1 | 1.21 | 0.12 | 1   | 1.07 |
| bax    | putative ex            | 0.91 | 0.08 | 1 | 1.2  | 0.13 | 1   | 1.19 |
| kdtA   | 3-deoxy-D-             | 0.95 | 0.13 | 1 | 1.37 | 0.51 | 1   | 1.37 |
| sdaB   | L-serine de            | 0.84 | 0.08 | 1 | 1.04 | 0.09 | 1   | 1.19 |
| ppdC   | prepilin pe            | 0.98 | 0.19 | 1 | 1.11 | 0.16 | 1   | 1.17 |
| yeiA   |                        | 1.17 | 0.15 | 1 | 0.88 | 0.11 | 1   | 0.87 |
| yejH   | putative he            | 1.07 | 0.07 | 1 | 0.89 | 0.21 | 1   | 0.88 |
| narP   | nitrate/nitrit         | 1    | 0.08 | 1 | 1.02 | 0.21 | 1   | 0.92 |
|        | conserved              | 1.08 | 0.16 | 1 | 0.72 | 0.09 | 1   | 0.73 |
| rpsH   | 30S ribosom            | 0.96 | 0.15 | 1 | 1.13 | 0.2  | 1   | 1.22 |
|        | conserved              | 1.09 | 0.11 | 1 | 1.23 | 0.27 | 0   | 0.84 |
| poxB   | pyruvate de            | 1.06 | 0.16 | 1 | 0.9  | 0.1  | 1   | 0.81 |
| rplB   | 50S ribosom            | 1    | 0.16 | 1 | 1.12 | 0.13 | 1   | 1.35 |
| yjeM   | putative arr           | 1.07 | 0.18 | 1 | 1.17 | 0.18 | 1   | 1.14 |
| rpsF   | 30s ribosom            | 1.06 | 0.16 | 1 | 1.13 | 0.12 | 1   | 1.22 |
| glnE   | adenyl-tran            | 0.96 | 0.11 | 1 | 1.11 | 0.11 | 1   | 1.2  |
|        | conserved              | 1.02 | 0.15 | 1 | 1.31 | 0.19 | 1   | 1.38 |
|        | putative me            | 1.05 | 0.1  | 1 | 1.2  | 0.11 | 1   | 1.13 |
|        | probable a             | 1    | 0.04 | 1 | 1.17 | 0.22 | 1   | 1.13 |
| dcuA   | anaerobic (            | 1.06 | 0.17 | 1 | 1.3  | 0.16 | 1   | 1.13 |
| ampH   | penicillin-bi          | 0.95 | 0.07 | 1 | 0.97 | 0.11 | 1   | 0.89 |
|        | putative su            | 1.03 | 0.08 | 1 | 1    | 0.16 | 1   | 0.86 |
| yjeF   | putative AE            | 1.02 | 0.07 | 1 | 0.87 | 0.09 | 1   | 0.83 |
| yjeL   | conserved              | 0.91 | 0.21 | 0 | 1.05 | 0.24 | 0   | 0.96 |
| wcaE   | putative gly           | 1.09 | 0.09 | 1 | 0.81 | 0.08 | 1   | 0.81 |
| yohC   | putative me            | 0.9  | 0.06 | 1 | 1.04 | 0.19 | 1   | 0.84 |
| mtlR   | mannitol op            | 0.96 | 0.14 | 1 | 1.34 | 0.1  | 1   | 1.21 |
| yhjD   | putative me            | 1.09 | 0.07 | 1 | 1.16 | 0.16 | 1   | 1.22 |
|        | conserved              | 1.14 | 0.13 | 1 | 1.08 | 0.11 | 1   | 1.24 |
|        | conserved              | 0.99 | 0.13 | 1 | 1.15 | 0.11 | 1   | 1.26 |
| msbB   | lipid A acyli          | 1.03 | 0.08 | 1 | 0.72 | 0.04 | 1   | 0.84 |
| ssaJ   | putative pa            | 1.02 | 0.2  | 1 | 0.7  | 0.09 | 1   | 0.8  |
|        | putative gly           | 1.09 | 0.16 | 1 | 0.81 | 0.09 | 1   | 0.9  |
|        | putative me            | 1.07 | 0.1  | 1 | 0.96 | 0.09 | 0   | 0.65 |
|        | regulator, LysR family | 0.13 | 0.04 | 1 | 0.81 | 0.09 | 1   | n/a  |
|        | ABC transp             | 0.98 | 0.07 | 1 | 0.81 | 0.19 | 1   | 0.83 |
| ass I  | anaerobic              | 0.18 | 0.04 | 1 | 0.92 | 0.1  | 1   | n/a  |
| ybhL   |                        | 0.99 | 0.08 | 1 | 0.9  | 0.07 | 1   | 0.77 |
| rotein |                        | 0.15 | 0.02 | 1 | 0.92 | 0.22 | 1   | n/a  |
| ttrA   | tetrathionat           | 1.01 | 0.07 | 1 | 0.75 | 0.07 | 1   | 0.72 |
|        | putative me            | 1.05 | 0.07 | 1 | 1.23 | 0.2  | 1   | 1.22 |
| yjfR   | conserved              | 1.01 | 0.12 | 1 | 1.06 | 0.14 | 1   | 1.03 |



|                         |              |      |      |     |      |      |     |     |      |
|-------------------------|--------------|------|------|-----|------|------|-----|-----|------|
|                         |              | 0.24 | 0.03 | 1   | 1.04 | 0.38 | n/a | n/a |      |
| ssaE                    | putative se  | 0.92 | 0.11 | 1   | 0.7  | 0.03 |     | 1   | 0.81 |
|                         | putative me  | 0.89 | 0.07 | 1   | 0.98 | 0.09 |     | 1   | 0.97 |
|                         | conserved    | 1.01 | 0.1  | 1   | 0.87 | 0.1  |     | 1   | 0.96 |
| yhfG                    | conserved    | 0.79 | 0.2  | 1   | 1.14 | 0.18 |     | 1   | 1.05 |
| cbiN                    | putative co  | 1.01 | 0.18 | 1   | 0.81 | 0.07 |     | 1   | 0.84 |
| phnW                    | 2-aminoeth   | 1.03 | 0.14 | 1   | 1.01 | 0.06 |     | 1   | 0.77 |
| rpsR                    | 30s ribosor  | 1.07 | 0.2  | 1   | 1.03 | 0.23 |     | 1   | 1.18 |
| rpmC                    | 50S ribosor  | 1    | 0.12 | 1   | 1.19 | 0.22 |     | 1   | 1.44 |
| relB                    | RelB protei  | 1.07 | 0.13 | 1   | 1.16 | 0.14 |     | 1   | 1.17 |
|                         | probable lip | 0.95 | 0.14 | 1   | 0.99 | 0.08 |     | 1   | 0.93 |
| gshB                    | glutathione  | 0.95 | 0.05 | 1   | 1.2  | 0.09 |     | 1   | 1.1  |
| dinI                    | damage-in    | 0.96 | 0.09 | 1   | 0.86 | 0.15 |     | 1   | 0.78 |
|                         |              | 0.93 | 0.11 | 1   | 1.12 | 0.18 |     | 1   | 1.1  |
| ft                      |              | 0.89 | 0.08 | 1   | 1.57 | 0.31 |     | 1   | n/a  |
| rotein                  |              | 0.19 | 0.32 | 1   | 1.34 | 0.19 |     | 1   | n/a  |
| yheU                    | conserved    | 1.03 | 0.05 | 1   | 1.22 | 0.11 |     | 1   | 1.19 |
| clpP                    | ATP-deper    | 1.07 | 0.13 | 1   | 1    | 0.09 |     | 1   | 0.89 |
| cspH                    | putative co  | 1.09 | 0.08 | 1   | 0.66 | 0.15 |     | 1   | 0.77 |
|                         | conserved    | 1.11 | 0.15 | 1   | 0.71 | 0.05 |     | 1   | 0.84 |
| pncA                    | pyrazinami   | 1.05 | 0.12 | 1   | 0.77 | 0.04 |     | 1   | 0.76 |
| rimI                    | ribosomal-γ  | 1.05 | 0.08 | 1   | 1.11 | 0.12 |     | 1   | 1.12 |
| rbsR                    | ribose oper  | 0.96 | 0.13 | 1   | 1.39 | 0.41 |     | 1   | 1.36 |
|                         | putative ex  | 1    | 0.1  | 1   | 0.75 | 0.09 |     | 1   | 0.87 |
|                         | hypothetica  | 1.08 | 0.14 | 0   | 1.19 | 0.46 |     | 0   | 1.25 |
|                         | hypothetica  | 0.72 | 0.13 | 1   | 1.02 | 0.3  |     | 0   | 0.79 |
|                         | hypothetica  | 1.08 | 0.23 | 0   | 1.3  | 0.55 |     | 0   | 0.9  |
|                         | hypothetica  | 1.05 | 0.11 | 0   | 1.06 | 0.49 |     | 0   | 1.02 |
|                         | conserved    | 1.11 | 0.1  | 1   | 0.85 | 0.18 |     | 1   | 0.91 |
| rotein                  |              | 0.09 | 0.02 | 1   | 0.74 | 0.06 | n/a |     | n/a  |
| NA transport            |              | 0.06 | 0.02 | 1   | 0.64 | 0.08 | n/a |     | n/a  |
| rotein                  |              | 0.1  | 0.03 | 1   | 0.66 | 0.1  | n/a |     | n/a  |
|                         |              | 0.09 | 0.03 | 1   | 0.7  | 0.07 | n/a |     | n/a  |
| kinase / uridine kinase |              | 0.02 | 0.01 | 1   | 0.72 | 0.11 | n/a |     | n/a  |
| ssembly                 |              | 0.04 | 0.02 | 1   | 0.66 | 0.05 | n/a |     | n/a  |
|                         |              | n/a  | n/a  | n/a | n/a  | n/a  | n/a |     | n/a  |
|                         |              | n/a  | n/a  | n/a | n/a  | n/a  | n/a |     | n/a  |
|                         |              | n/a  | n/a  | n/a | n/a  | n/a  | n/a |     | n/a  |
|                         |              | n/a  | n/a  | n/a | n/a  | n/a  | n/a |     | n/a  |
|                         |              | n/a  | n/a  | n/a | n/a  | n/a  | n/a |     | n/a  |
|                         |              | n/a  | n/a  | n/a | n/a  | n/a  | n/a |     | n/a  |
|                         |              | n/a  | n/a  | n/a | n/a  | n/a  | n/a |     | n/a  |
| speF                    |              | 1.11 | 0.13 | 1   | 0.99 | 0.1  | n/a |     | 0.9  |
|                         |              | 1.02 | 0.21 | 1   | 0.92 | 0.09 |     | 1   | 0.93 |
|                         |              | 1.03 | 0.25 | 0   | 1    | 0.22 | n/a |     | n/a  |
|                         |              | 1.08 | 0.15 | 1   | 0.84 | 0.09 | n/a |     | 0.81 |
|                         |              | 0.2  | 0.05 | 1   | 0.84 | 0.09 | n/a |     | n/a  |
|                         |              | 0.98 | 0.12 | 1   | 0.84 | 0.08 | n/a |     | 0.87 |
|                         | putative en  | 14.4 | 4.99 | 1   | n/a  | n/a  | n/a |     | 0.77 |
|                         | putative me  | 5.32 | 1.66 | 1   | n/a  | n/a  | n/a |     | 1.11 |
|                         | hypothetica  | 5.28 | 0.55 | 1   | n/a  | n/a  | n/a |     | 1.49 |
| insA                    | insertion el | 10.7 | 5.51 | 1   | n/a  | n/a  | n/a |     | 0.87 |
|                         | putative ba  | 5.67 | 1.47 | 1   | n/a  | n/a  | n/a |     | 1.08 |

|                     |               |       |      |     |      |      |      |      |      |
|---------------------|---------------|-------|------|-----|------|------|------|------|------|
| kil                 | putative IS   | 5.44  | 1.75 | 1   | n/a  | n/a  | n/a  | 1.04 |      |
|                     | putative ce   | 6.77  | 1.24 | 1   | n/a  | n/a  | n/a  | 0.96 |      |
|                     | hypothetica   | 1.31  | 0.1  | 1   |      | 0.92 | 0.23 | n/a  | 0.8  |
| ompS1               |               | 1.07  | 0.15 | 1   |      | 1    | 0.09 | n/a  | 0.9  |
|                     | putative ph   | 5.92  | 0.96 | 1   | n/a  | n/a  | n/a  | 1.16 |      |
|                     | putative lys  | 5.74  | 1.19 | 1   | n/a  | n/a  | n/a  | 0.89 |      |
|                     | hypothetica   | 6.52  | 1.07 | 1   | n/a  | n/a  | n/a  | 0.83 |      |
|                     | outer mem     | 0.81  | 0.16 | 0   |      | 1.41 | 0.73 | n/a  | 0.69 |
|                     | putative ex   | 9.36  | 1.39 | 1   | n/a  | n/a  | n/a  | 0.87 |      |
|                     | putative rev  | 5.89  | 2.43 | 1   | n/a  | n/a  | n/a  | 1.02 |      |
|                     | hypothetica   | 10.35 | 3.11 | 1   | n/a  | n/a  | n/a  | 1.1  |      |
|                     | conserved     | 7.72  | 1.47 | 1   | n/a  | n/a  | n/a  | 0.66 |      |
|                     | hypothetica   | 10.24 | 2.48 | 1   | n/a  | n/a  | n/a  | 0.68 |      |
|                     | hypothetica   | 7.71  | 1.14 | 1   | n/a  | n/a  | n/a  | 0.82 |      |
|                     | putative Gr   | 9.48  | 2.16 | 1   | n/a  | n/a  | n/a  | 1.12 |      |
|                     |               | 1.12  | 0.1  | 1   |      | 1.3  | 0.18 | n/a  | 1.37 |
|                     | hypothetica   | 9.56  | 2.68 | 1   | n/a  | n/a  | n/a  | 0.61 |      |
|                     | putative lipi | 11.68 | 2.31 | 1   | n/a  | n/a  | n/a  | 0.66 |      |
|                     | hypothetica   | 9.04  | 2.03 | 1   | n/a  | n/a  | n/a  | 0.66 |      |
|                     |               | 1.54  | 0.24 | 1   |      | 1.05 | 0.09 | n/a  | 1.06 |
| hypothetica         | 31.49         | 11.51 | 1    | n/a | n/a  | n/a  | 1.14 |      |      |
| putative ex         | 28.75         | 4.6   | 1    | n/a | n/a  | n/a  | 1.06 |      |      |
| hypothetica         | 12.14         | 1.06  | 1    | n/a | n/a  | n/a  | 1.29 |      |      |
| hypothetica         | 32.35         | 6.6   | 1    | n/a | n/a  | n/a  | 1.03 |      |      |
| putative ph         | 1.39          | 0.16  | 1    |     | 1.04 | 0.07 | 1    | 1.11 |      |
| hypothetica         | 7.1           | 1.5   | 1    | n/a | n/a  | n/a  | 1.23 |      |      |
|                     | 1.59          | 0.18  | 1    |     | 1.1  | 0.12 | n/a  | 1.26 |      |
| yjhP                | conserved     | 5.63  | 1.56 | 1   | n/a  | n/a  | n/a  | 1.07 |      |
| pilK                | putative ex   | 17.39 | 7.35 | 1   | n/a  | n/a  | n/a  | 1.09 |      |
|                     | hypothetica   | 16.65 | 2.91 | 1   | n/a  | n/a  | n/a  | 1.21 |      |
|                     | hypothetica   | 20.24 | 5.92 | 1   | n/a  | n/a  | n/a  | 1.07 |      |
| panD                | aspartate 1   | 1.1   | 0.2  | 1   |      | 1.08 | 0.17 | 1    | 1.17 |
| rcsF                | RcsF prote    | 1.06  | 0.19 | 1   |      | 0.92 | 0.18 | 1    | 0.82 |
|                     |               | 0.49  | 0.13 | 1   |      | 0.81 | 0.29 | 1    | 0.75 |
| btuR                | COB(l) alai   | 1.03  | 0.15 | 1   |      | 0.9  | 0.17 | 1    | 0.86 |
| pstA                | phosphate     | 0.96  | 0.16 | 1   |      | 1.33 | 0.14 | 1    | 1.29 |
| yieO                |               | 1.09  | 0.1  | 1   |      | 1.29 | 0.14 | 1    | 1.37 |
| nadR                | conserved     | 0.94  | 0.1  | 1   |      | 1.13 | 0.15 | 1    | 1.15 |
| cbiJ                |               | 0.89  | 0.1  | 1   |      | 0.84 | 0.23 | 1    | 0.86 |
| rpsL                | 30S ribosoi   | 0.99  | 0.09 | 1   |      | 1.23 | 0.14 | 1    | 1.61 |
| hemF                | coproporph    | 0.87  | 0.08 | 1   |      | 0.9  | 0.35 | 1    | 1.1  |
|                     | probable A    | 1.05  | 0.09 | 1   |      | 1.22 | 0.16 | 1    | 1.39 |
|                     | possible Gi   | 1.01  | 0.07 | 1   |      | 1.16 | 0.15 | 1    | 1.45 |
| yacA                | conserved     | 0.98  | 0.11 | 1   |      | 1.19 | 0.37 | n/a  | 1.07 |
| yacK                | possible m    | 1.06  | 0.09 | 1   |      | 1.05 | 0.2  | 1    | 0.97 |
| sfsA                | sugar ferm    | 0.92  | 0.05 | 1   |      | 0.97 | 0.11 | 1    | 1.03 |
| yaeL                | putative me   | 0.96  | 0.04 | 1   |      | 0.93 | 0.06 | 1    | 0.93 |
|                     | putative me   | 0.87  | 0.04 | 1   |      | 0.74 | 0.16 | 1    | 0.79 |
| hyaB2               |               | 0.96  | 0.03 | 1   |      | 0.73 | 0.17 | 1    | 0.87 |
| perone, DnaJ family |               | 0.09  | 0.02 | 1   |      | 0.87 | 0.11 | 1    | n/a  |
|                     |               | 1     | 0.19 | 1   |      | 0.96 | 0.09 | n/a  | 0.93 |
| e                   |               | 0.13  | 0.06 | 1   |      | 1.09 | 0.18 | 1    | n/a  |

|                          |                     |      |      |   |      |      |     |      |
|--------------------------|---------------------|------|------|---|------|------|-----|------|
|                          | conserved           | 1.02 | 0.19 | 1 | 1.16 | 0.44 | 0   | 0.9  |
| ar                       | to retron in E coli | 0.52 | 0.13 | 1 | 1.17 | 0.35 | 1   | n/a  |
| rotein                   |                     | 0.1  | 0.02 | 1 | 1.07 | 0.18 | 1   | n/a  |
| serB                     | putative ph         | 0.89 | 0.12 | 1 | 1.12 | 0.23 | 1   | 1.14 |
| mltD                     | membrane            | 0.98 | 0.13 | 1 | 1.09 | 0.17 | 1   | 1.07 |
| gmhA                     | phosphohe           | 0.96 | 0.07 | 1 | 1.11 | 0.2  | 1   | 1.04 |
| regulator,               | LysR family         | 0.11 | 0.02 | 1 | 0.91 | 0.18 | 1   | n/a  |
|                          | conserved           | 1.09 | 0.06 | 1 | 0.86 | 0.2  | 1   | 0.86 |
|                          | putative AE         | 1.1  | 0.11 | 1 | 0.88 | 0.25 | 1   | 0.74 |
| rotein                   |                     | 0.17 | 0.56 | 1 | 1.07 | 0.22 | 0   | n/a  |
|                          | conserved           | 0.89 | 0.07 | 1 | 0.95 | 0.2  | 0   | 0.77 |
|                          | conserved           | 1.15 | 0.09 | 1 | 0.79 | 0.21 | 1   | 0.81 |
|                          | conserved           | 0.99 | 0.04 | 1 | 1.05 | 0.37 | 1   | 0.77 |
|                          | conserved           | 0.83 | 0.08 | 1 | 1.1  | 0.26 | 1   | 0.78 |
| rotein                   |                     | 0.82 | 0.04 | 1 | 0.88 | 0.17 | 1   | 0.8  |
|                          | putative me         | 1.24 | 0.21 | 1 | 0.66 | 0.3  | 1   | 0.78 |
| rplR                     | 50S riboso          | 1.08 | 0.13 | 1 | 1.04 | 0.32 | 1   | 1.37 |
| argD                     | acetylornitr        | 0.98 | 0.21 | 1 | 1.25 | 0.16 | 1   | 1.25 |
| feoA                     | putative fer        | 0.97 | 0.14 | 1 | 1.27 | 0.41 | 0   | 1.34 |
|                          |                     | 0.35 | 0.12 | 0 | 1.25 | 0.38 | n/a | n/a  |
| -curing protein of phage |                     | 0.33 | 0.08 | 1 | 1.23 | 0.18 | 1   | n/a  |
| mukF                     | killing facto       | 1.02 | 0.05 | 1 | 0.79 | 0.12 | 1   | 0.8  |
|                          |                     | 1.01 | 0.11 | 1 | 1.25 | 0.21 | 1   | 1.37 |
|                          | hypothetica         | 1.02 | 0.08 | 1 | 1.28 | 0.11 | 1   | 1.32 |
| yijD                     | putative me         | 0.97 | 0.17 | 0 | 1.33 | 0.17 | 0   | 1.35 |
|                          | hypothetica         | 1.01 | 0.08 | 1 | 1.07 | 0.12 | 1   | 1.13 |
| rotein                   |                     | 0.11 | 0.03 | 1 | 0.98 | 0.09 | 1   | n/a  |
| yijO                     | putative Ar         | 0.81 | 0.04 | 1 | 1.26 | 0.15 | 1   | 1.22 |
| ne protein               |                     | 0.24 | 0.07 | 1 | 1.04 | 0.19 | 1   | n/a  |
| slyA                     | putative re         | 0.81 | 0.12 | 1 | 1.1  | 0.11 | 1   | 1.28 |
| vacJ                     | VacJ lipopr         | 0.96 | 0.06 | 1 | 0.83 | 0.12 | 1   | 0.96 |
|                          |                     | 0.27 | 0.16 | 1 | 0.95 | 0.28 | 0   | n/a  |
|                          | putative me         | 1.03 | 0.11 | 1 | 0.9  | 0.21 | 1   | 0.82 |
| aceK                     | isocitrate d        | 1.05 | 0.11 | 1 | 1.14 | 0.05 | 1   | 1.34 |
| metB                     | cystathionii        | 1.07 | 0.1  | 1 | 1.25 | 0.18 | 1   | 1.24 |
| argE                     | acetylornitr        | 1.12 | 0.07 | 1 | 1.35 | 0.07 | 1   | 1.36 |
| nlpD                     | lipoprotein         | 1.1  | 0.05 | 1 | 1.12 | 0.13 | 1   | 1.15 |
|                          |                     | 1.06 | 0.12 | 1 | 0.87 | 0.15 | 1   | 0.89 |
| yfeF                     | putative ox         | 0.99 | 0.1  | 1 | 0.96 | 0.06 | 1   | 1.06 |
| sspH2                    | secreted ef         | 0.93 | 0.1  | 1 | 0.8  | 0.08 | n/a | 0.89 |
| hpcR                     | homoproto           | 1.09 | 0.08 | 1 | 0.87 | 0.13 | 1   | 0.84 |
|                          | putative M          | 1.09 | 0.13 | 1 | 1.02 | 0.32 | 0   | 0.83 |
| orn                      | oligoribonu         | 0.9  | 0.11 | 1 | 1.19 | 0.07 | 1   | 1.15 |
| sgaH                     | putative he         | 0.79 | 0.09 | 1 | 1.23 | 0.16 | 1   | 1.13 |
| osphate-requiring enzy   |                     | 0.08 | 0.02 | 1 | 1.15 | 0.27 | 1   | n/a  |
| yojF                     | putative na         | 1    | 0.05 | 1 | 1.03 | 0.19 | 0   | 0.82 |
| eductase                 |                     | 0.15 | 0.04 | 1 | 1.03 | 0.1  | 1   | n/a  |
|                          | conserved           | 0.95 | 0.07 | 1 | 1.1  | 0.1  | 1   | 1.16 |
| tsr                      |                     | 0.92 | 0.09 | 1 | 1.08 | 0.15 | 1   | 1.18 |
| cobB                     | putative re         | 1.11 | 0.06 | 1 | 0.86 | 0.1  | 1   | 0.75 |
| sodC                     | copper-zinc         | 0.91 | 0.07 | 1 | 1.09 | 0.35 | 0   | 0.85 |
| g                        |                     | 1.23 | 0.14 | 1 | 0.74 | 0.07 | n/a | 0.78 |

|                          |               |      |      |   |      |      |     |      |
|--------------------------|---------------|------|------|---|------|------|-----|------|
| hopD                     | Type III lea  | 0.89 | 0.11 | 1 | 1.12 | 0.09 | 1   | 1.27 |
|                          | putative etf  | 1.28 | 0.13 | 1 | 0.93 | 0.17 | 1   | 0.98 |
| potC                     | spermidine    | 1.1  | 0.1  | 1 | 0.75 | 0.06 | 1   | 0.79 |
| pfkB                     | 6-phosphol    | 1.03 | 0.16 | 1 | 0.82 | 0.19 | 1   | 0.83 |
| yjfl                     | conserved     | 0.98 | 0.17 | 1 | 1.28 | 0.26 | 0   | 1.51 |
| potA                     | spermidine    | 0.92 | 0.16 | 1 | 0.79 | 0.23 | 1   | 0.84 |
| bcfA                     | fimbrial sut  | 0.99 | 0.12 | 1 | 1.12 | 0.13 | 1   | 1.14 |
| selD                     | selenophos    | 1.08 | 0.11 | 1 | 0.74 | 0.12 | 1   | 0.8  |
| rpmI                     | 50S riboso    | 1.06 | 0.16 | 0 | 1.24 | 0.39 | 0   | 0.93 |
| ydhB                     | putative tra  | 0.91 | 0.06 | 1 | 0.68 | 0.09 | 1   | 0.65 |
| livF                     | high-affinity | 0.91 | 0.07 | 1 | 1.09 | 0.16 | 1   | 1.27 |
| leuB                     | 3-isopropyl   | 0.94 | 0.09 | 1 | 1.15 | 0.35 | 1   | 1.03 |
| citA                     | citrate-prot  | 0.93 | 0.04 | 1 | 0.81 | 0.2  | 1   | 0.87 |
| lamB                     | maltoporin    | 0.97 | 0.04 | 1 | 1.16 | 0.14 | 1   | 1.33 |
| rbsC                     | high affinity | 0.93 | 0.06 | 1 | 1.31 | 0.09 | 1   | 1.41 |
| yadQ                     | putative me   | 1    | 0.09 | 1 | 1.04 | 0.1  | 1   | 0.92 |
| ppiD                     | peptidyl-pro  | 0.93 | 0.08 | 1 | 0.96 | 0.11 | 1   | 0.91 |
| yajB                     | conserved     | 1.12 | 0.17 | 1 | 1.07 | 0.2  | 1   | 1.04 |
|                          | putative ex   | 1.09 | 0.09 | 1 | 1.17 | 0.17 | 1   | 1.23 |
|                          | putative tra  | 1.17 | 0.1  | 1 | 0.84 | 0.13 | 1   | 0.88 |
|                          | conserved     | 1.11 | 0.06 | 1 | 0.86 | 0.2  | 1   | 0.91 |
| egulator, AraC family    |               | 0.11 | 0.02 | 1 | 0.74 | 0.19 | 1   | n/a  |
|                          | conserved     | 1.02 | 0.14 | 1 | 0.79 | 0.23 | 1   | 0.78 |
| cld                      | polysaccha    | 0.94 | 0.15 | 1 | 0.73 | 0.08 | 1   | 0.93 |
| yieG                     | putative me   | 0.93 | 0.1  | 1 | 1.35 | 0.19 | 1   | 1.43 |
|                          | undecaprei    | 0.86 | 0.1  | 1 | 1.06 | 0.06 | 1   | 0.97 |
| yeeA                     | putative me   | 1.04 | 0.05 | 1 | 0.76 | 0.12 | 1   | 0.84 |
| mraY                     | phospho-N     | 0.97 | 0.05 | 1 | 1.04 | 0.11 | 1   | 0.88 |
| purF                     | amidophos     | 0.92 | 0.11 | 1 | 0.9  | 0.2  | 1   | 1.08 |
| rpoH                     | RNA polym     | 0.99 | 0.06 | 1 | 1.14 | 0.2  | 1   | 1.27 |
| pnp                      | polynucleoi   | 0.87 | 0.06 | 1 | 1.11 | 0.23 | 1   | 1.39 |
| hcaT                     | putative 3-φ  | 0.91 | 0.06 | 1 | 0.9  | 0.57 | 1   | 0.98 |
|                          |               | 0.38 | 0.11 | 1 | 1.05 | 0.31 | n/a | n/a  |
| lpxD                     | UDP-3-O-φ     | 1    | 0.09 | 1 | 1.02 | 0.16 | 1   | 0.93 |
| ilar to phage tail compo |               | 0.1  | 0.05 | 1 | 0.83 | 0.22 | n/a | n/a  |
|                          | putative req  | 1.04 | 0.14 | 1 | 1.33 | 0.11 | 1   | 1.39 |
| dppD                     | dipeptide tr  | 1.13 | 0.09 | 1 | 1.23 | 0.11 | 1   | 1.22 |
| ugpQ                     | glyceropho    | 1.1  | 0.11 | 1 | 1.22 | 0.14 | 1   | 1.28 |
| spoT                     | guanosine-    | 0.95 | 0.16 | 1 | 1.28 | 0.13 | 1   | 1.37 |
|                          | putative tra  | 0.97 | 0.13 | 1 | 1.21 | 0.27 | 1   | 0.9  |
| cadC                     | transcriptio  | 0.94 | 0.08 | 1 | 0.96 | 0.12 | 1   | 1.12 |
|                          | putative ex   | 0.93 | 0.15 | 1 | 0.92 | 0.31 | 0   | 1.15 |
| glnH                     | glutamine-l   | 1.1  | 0.15 | 1 | 0.93 | 0.17 | 1   | 0.87 |
|                          | conserved     | 0.98 | 0.08 | 1 | 1.01 | 0.1  | 1   | 0.91 |
|                          | ornithine ca  | 1.08 | 0.08 | 1 | 1.2  | 0.1  | 1   | 1.27 |
| srmB                     | ATP-deper     | 0.99 | 0.1  | 1 | 1.17 | 0.12 | 1   | 1.15 |
| ribB                     | 3,4-dihydro   | 1.01 | 0.09 | 1 | 1.12 | 0.17 | 1   | 1.24 |
| tyrB                     | aromatic-al   | 0.86 | 0.07 | 1 | 1.17 | 0.06 | 1   | 1.24 |
| asrB                     | anaerobic s   | 0.97 | 0.09 | 1 | 0.95 | 0.14 | 1   | 1.11 |
| hisG                     | ATP phosp     | 0.96 | 0.04 | 1 | 0.86 | 0.23 | 1   | 0.87 |
| fimZ                     | probable tr   | 0.92 | 0.03 | 1 | 0.93 | 0.11 | 1   | 0.86 |
| yihX                     | putative ha   | 0.87 | 0.07 | 1 | 1.31 | 0.19 | 1   | 1.37 |

|                         |                |      |      |   |      |          |       |      |
|-------------------------|----------------|------|------|---|------|----------|-------|------|
| potI                    | putrescine     | 1.03 | 0.03 | 1 | 0.94 | 0.09     | 1     | 0.77 |
| phrB                    | deoxyribod     | 0.97 | 0.18 | 1 | 0.94 | 0.09     | 1     | 0.88 |
|                         | hypothetica    | 0.91 | 0.12 | 1 | 1.27 | 0.13     | 1     | 1.3  |
| nagD                    | NagD prote     | 1.02 | 0.13 | 1 | 0.88 | 0.11     | 1     | 0.88 |
| nei                     | endonuclea     | 0.96 | 0.18 | 1 | 1.02 | 0.25     | 1     | 0.84 |
| metF                    | 5,10 methy     | 1.12 | 0.18 | 1 | 1.23 | 0.17     | 1     | 1.3  |
| soxR                    | SoxR prote     | 0.92 | 0.12 | 1 | 1.27 | 0.17     | 1     | 1.31 |
|                         |                | 1.03 | 0.2  | 1 | 1.29 | 0.22 n/a |       | 1.01 |
| hmpA                    | flavoheмо      | 0.99 | 0.19 | 1 | 0.91 | 0.12     | 1     | 1.05 |
|                         | probable se    | 1.08 | 0.15 | 0 | 1.47 | 0.45     | 0     | 0.95 |
| thiC                    | thiamine bi    | 0.83 | 0.04 | 1 | 1.3  | 0.15     | 1     | 1.41 |
| yihU                    | putative ox    | 1    | 0.1  | 1 | 1.46 | 0.13     | 1     | 1.53 |
| rotein                  |                | 0.92 | 0.09 | 1 | 1.42 | 0.34     | 0 n/a |      |
| stpA                    | tyrosine ph    | 0.84 | 0.05 | 1 | 0.95 | 0.11     | 1     | 1.19 |
| plsX                    | fatty acid/p   | 0.98 | 0.07 | 1 | 0.78 | 0.09     | 1     | 0.81 |
| rnb                     | exoribonuc     | 0.9  | 0.08 | 1 | 0.63 | 0.08     | 1     | 0.75 |
| sfhB                    | ftsH suppre    | 0.91 | 0.04 | 1 | 1.08 | 0.17     | 1     | 1.17 |
| lytB                    | LytB proteii   | 0.92 | 0.04 | 1 | 1.12 | 0.18     | 1     | 1.16 |
|                         | putative ba    | 0.94 | 0.08 | 0 | 1.55 | 0.35     | 0     | 0.69 |
|                         | putative gly   | 1    | 0.12 | 1 | 1.26 | 0.2      | 1     | 1.31 |
|                         | putative pa    | 1.06 | 0.08 | 1 | 0.69 | 0.09     | 1     | 0.76 |
|                         | conserved      | 1.09 | 0.12 | 1 | 0.83 | 0.16     | 1     | 0.77 |
| stop following codon 2: |                | 1.12 | 0.14 | 1 | 1.08 | 0.2 n/a  | n/a   |      |
|                         | phosphatid     | 1.05 | 0.13 | 1 | 1.25 | 0.32     | 1     | 0.94 |
| ogt                     | O6-methylc     | 0.97 | 0.17 | 1 | 0.73 | 0.14     | 1     | 0.85 |
|                         | putative se    | 0.87 | 0.08 | 1 | 0.69 | 0.08     | 1     | 0.78 |
|                         | conserved      | 0.94 | 0.1  | 1 | 0.81 | 0.11     | 1     | 0.85 |
| narL                    | nitrate/nitrit | 0.99 | 0.14 | 1 | 0.8  | 0.14     | 1     | 0.82 |
| ptr                     | protease III   | 0.93 | 0.05 | 1 | 1.11 | 0.1      | 1     | 1.18 |
| ygbP                    | 2-C-methyl     | 0.84 | 0.06 | 1 | 1.02 | 0.1      | 1     | 1.13 |
|                         | DeoR-fami      | 0.97 | 0.08 | 1 | 1.11 | 0.19     | 1     | 1.09 |
| scsB                    | membrane       | 1.05 | 0.09 | 1 | 0.97 | 0.12     | 1     | 0.8  |
| apaH                    | bis(5'-nucl    | 0.91 | 0.06 | 1 | 0.96 | 0.08     | 1     | 0.96 |
| yifK                    | probable ai    | 0.95 | 0.05 | 1 | 1.28 | 0.09     | 1     | 1.22 |
| gppA                    | guanosine-     | 0.89 | 0.05 | 1 | 1.39 | 0.25     | 1     | 1.33 |
| rplJ                    | 50S riboso     | 0.96 | 0.06 | 1 | 1.21 | 0.57     | 1     | 1.4  |
| minD                    | septum site    | 0.95 | 0.04 | 1 | 0.91 | 0.18     | 0     | 0.9  |
|                         | putative ex    | 1.08 | 0.27 | 1 | 0.78 | 0.11     | 1     | 0.72 |
| cheW                    | purine bind    | 1.15 | 0.13 | 1 | 0.81 | 0.09     | 1     | 0.78 |
| pepE                    | peptidase E    | 0.99 | 0.08 | 1 | 1.19 | 0.11     | 1     | 1.28 |
| phnX                    | phosphono      | 0.98 | 0.11 | 1 | 1    | 0.14     | 1     | 0.91 |
| yiiL                    | conserved      | 1.2  | 0.18 | 1 | 1.31 | 0.22     | 1     | 1.49 |
| metR                    | trans-activa   | 0.87 | 0.15 | 1 | 1.33 | 0.2 n/a  |       | 1.36 |
|                         | conserved      | 0.93 | 0.18 | 1 | 0.89 | 0.13     | 1     | 0.99 |
|                         | conserved      | 1.04 | 0.18 | 1 | 0.88 | 0.2      | 1     | 0.75 |
| narZ                    | respiratory    | 1.09 | 0.09 | 1 | 0.8  | 0.15     | 1     | 0.75 |
| tehA                    | tellurite res  | 1.06 | 0.13 | 1 | 0.71 | 0.04     | 1     | 0.77 |
| sseJ                    | secreted ef    | 0.21 | 0.06 | 1 | 0.77 | 0.19     | 1     | 0.74 |
|                         | putative lipi  | 1.15 | 0.08 | 1 | 0.85 | 0.31     | 1     | 0.81 |
| acrA                    | acriflavin re  | 0.91 | 0.06 | 1 | 0.99 | 0.08     | 1     | 0.91 |
|                         | membrane       | 0.98 | 0.05 | 1 | 0.67 | 0.06     | 1     | 0.74 |
|                         | putative me    | 0.95 | 0.05 | 1 | 0.69 | 0.15     | 1     | 0.75 |

|               |               |      |      |   |      |        |     |      |
|---------------|---------------|------|------|---|------|--------|-----|------|
|               | putative lipi | 0.91 | 0.05 | 1 | 0.85 | 0.12   | 1   | 0.8  |
| ybdR          | hypothetica   | 0.97 | 0.08 | 1 | 0.92 | 0.13   | 1   | 0.87 |
|               | conserved     | 1.05 | 0.08 | 1 | 0.74 | 0.25   | 1   | 0.74 |
| rotein        |               | 0.52 | 0.08 | 0 | 0.83 | 0.2    | 0   | n/a  |
|               |               | 0.24 | 0.08 | 1 | 0.68 | 0.09   | 1   | n/a  |
|               | putative pe   | 1.02 | 0.15 | 1 | 0.79 | 0.13   | 1   | 0.82 |
|               | conserved     | 0.99 | 0.14 | 1 | 0.96 | 0.16   | n/a | 0.79 |
| rotein        |               | 0.2  | 0.06 | 1 | 0.72 | 0.1    | 1   | n/a  |
| exoX          | exodeoxyri    | 1.09 | 0.09 | 1 | 0.84 | 0.13   | 1   | 0.85 |
| fucO          | 1,2-propan    | 1.1  | 0.09 | 1 | 1    | 0.23   | 1   | 1.17 |
|               | conserved     | 0.96 | 0.12 | 1 | 1.13 | 0.18   | 1   | 1.12 |
| serA          | D-3-phospl    | 0.98 | 0.07 | 1 | 1.04 | 0.25   | 1   | 1.16 |
| endA          | endonuclea    | 1.04 | 0.07 | 1 | 1.13 | 0.06   | 1   | 1.21 |
| yajG          | putative lipi | 0.99 | 0.04 | 1 | 0.9  | 0.04   | 1   | 0.95 |
|               | putative me   | 1.01 | 0.03 | 1 | 1.19 | 0.04   | 1   | 1.06 |
| yhjN          | putative po   | 0.92 | 0.05 | 1 | 1.28 | 0.16   | 1   | 1.19 |
| yaR           | putative su   | 0.83 | 0.05 | 1 | 1.25 | 0.12   | 1   | 1.32 |
|               | 2,3-bisphos   | 0.95 | 0.07 | 1 | 1.24 | 0.14   | 1   | 1.37 |
| ygcY          | probable gl   | 0.92 | 0.06 | 1 | 1.04 | 0.11   | 1   | 1.08 |
|               | N-acetylm     | 0.91 | 0.03 | 1 | 1.03 | 0.09   | 1   | 1.15 |
| lysS          | lysyl tRNA    | 0.9  | 0.09 | 1 | 1.01 | 0.09   | 1   | 1.19 |
|               | putative ex   | 1.04 | 0.12 | 1 | 1.22 | 0.16   | 1   | 1.24 |
| ygdD          | conserved     | 1.07 | 0.16 | 1 | 1.17 | 0.21   | 1   | 1.15 |
|               |               | 0.89 | 0.11 | 0 | 1.35 | 101.33 | 0   | 0.94 |
| rotein        |               | 0.2  | 0.04 | 1 | 1.41 | 0.37   | 0   | n/a  |
|               | probable tv   | 0.93 | 0.18 | 1 | 1.2  | 0.36   | 1   | 1.32 |
| araE          | L-arabinosi   | 0.94 | 0.07 | 1 | 1.01 | 0.11   | 1   | 1.07 |
|               | putative lipi | 1.04 | 0.13 | 1 | 0.93 | 0.21   | 1   | 0.94 |
| rfbD          | dTDP-4-de     | 0.94 | 0.07 | 1 | 0.79 | 0.11   | 1   | 0.91 |
| yehT          | putative tw   | 1.02 | 0.08 | 1 | 0.84 | 0.1    | 1   | 0.93 |
| ybjX          | putative vir  | 1.01 | 0.08 | 1 | 0.86 | 0.1    | 1   | 0.82 |
| xyIR          | xylose ope    | 0.96 | 0.08 | 1 | 1.29 | 0.07   | 1   | 1.31 |
|               | conserved     | 1.22 | 0.21 | 1 | 1.21 | 0.3    | 0   | 1.25 |
|               | putative ex   | 0.89 | 0.01 | 1 | 1.32 | 0.12   | 1   | 1.29 |
|               | conserved     | 0.97 | 0.06 | 1 | 1.46 | 0.21   | 1   | 1.33 |
| greB          | transcriptio  | 0.97 | 0.06 | 1 | 1.12 | 0.09   | 1   | 1.39 |
| folP          | dihydropter   | 1.09 | 0.11 | 1 | 1.04 | 0.1    | 1   | 1.23 |
| deoB          | phosphope     | 0.94 | 0.03 | 1 | 0.99 | 0.14   | 1   | 1.1  |
| ystem protein |               | 0.08 | 0.02 | 1 | 0.92 | 0.08   | 1   | n/a  |
| truB          | tRNA pseu     | 0.85 | 0.11 | 1 | 1.27 | 0.15   | 1   | 1.41 |
|               | conserved     | 0.98 | 0.17 | 1 | 1.11 | 0.13   | 1   | 1.35 |
|               | conserved     | 1.12 | 0.18 | 1 | 1.04 | 0.45   | 1   | 1.12 |
| luxS          | autoinduce    | 1.05 | 0.11 | 1 | 1.12 | 0.19   | 1   | 1.22 |
| yohJ          | putative me   | 1.05 | 0.08 | 1 | 0.92 | 0.16   | 1   | 0.98 |
| yejG          | conserved     | 1.1  | 0.1  | 1 | 0.93 | 0.25   | 0   | 0.97 |
| yejD          | ribosomal s   | 0.97 | 0.12 | 1 | 0.96 | 0.18   | 1   | 0.85 |
| mrp           | conserved     | 0.99 | 0.09 | 1 | 0.87 | 0.12   | 1   | 1.03 |
|               | conserved     | 1.06 | 0.12 | 1 | 1.08 | 0.16   | 1   | 0.86 |
| rplF          | 50S riboso    | 0.99 | 0.08 | 1 | 1.17 | 0.14   | 1   | 1.49 |
| ppiA          | peptidyl-prc  | 1.13 | 0.1  | 1 | 1.16 | 0.11   | 1   | 1.23 |
| hflK          | HflK proteir  | 0.97 | 0.05 | 1 | 1.08 | 0.1    | 1   | 1.09 |
| cigR          |               | 1.02 | 0.04 | 1 | 1.37 | 0.14   | 1   | 1.41 |



|                           |               |       |      |     |      |      |     |      |
|---------------------------|---------------|-------|------|-----|------|------|-----|------|
|                           |               | n/a   | n/a  | n/a | n/a  | n/a  | n/a | n/a  |
|                           |               | 0.18  | 0.02 | 1   | 0.88 | 0.13 | n/a | n/a  |
| ilar to tail assembly pro |               | 0.08  | 0.02 | 1   | 0.94 | 0.11 | 1   | n/a  |
|                           |               | 1.08  | 0.07 | 1   | 0.89 | 0.06 | n/a | 0.75 |
|                           |               | 0.15  | 0.05 | 1   | 1.04 | 0.12 | n/a | n/a  |
|                           |               | 0.22  | 0.1  | 1   | 1.2  | 0.3  | n/a | n/a  |
|                           |               | 1.02  | 0.09 | 1   | 0.94 | 0.15 | n/a | 1    |
|                           | hypothetica   | 14.72 | 7.27 | 1   | n/a  | n/a  | n/a | 1.07 |
|                           | conserved     | 6     | 1.41 | 1   | n/a  | n/a  | n/a | 0.96 |
| rfbE                      | CDP-tyvelc    | 10.54 | 5.21 | 1   | n/a  | n/a  | n/a | 0.88 |
|                           | putative ph   | 3.85  | 0.8  | 1   | n/a  | n/a  | n/a | 1.29 |
|                           | putative se   | 7.67  | 1.61 | 1   | n/a  | n/a  | n/a | 1.36 |
|                           | hypothetica   | 1.61  | 0.27 | 1   | n/a  | n/a  | n/a | 0.88 |
|                           |               | 4.06  | 1.63 | 1   | 1.23 | 0.19 | n/a | 1.15 |
|                           | possible lip  | 13.34 | 5.12 | 1   | n/a  | n/a  | n/a | 1.32 |
|                           | putative ph   | 3.06  | 0.37 | 1   | n/a  | n/a  | n/a | 1.14 |
| yiiF                      | putative Cc   | 3.74  | 1.34 | 1   | n/a  | n/a  | n/a | 1.31 |
|                           | hypothetica   | 7.23  | 3.71 | 1   | n/a  | n/a  | n/a | 0.78 |
|                           | hypothetica   | 9.8   | 2.19 | 1   | n/a  | n/a  | n/a | 0.74 |
|                           | hypothetica   | 4.84  | 0.7  | 1   | n/a  | n/a  | n/a | 1.35 |
| nucE                      | possible se   | 2.51  | 0.22 | 1   | n/a  | n/a  | n/a | 1.12 |
|                           | putative po   | 4.64  | 1.42 | 1   | n/a  | n/a  | n/a | 1.02 |
| staF                      | putative fir  | 11.7  | 4.84 | 1   | n/a  | n/a  | n/a | 0.92 |
|                           | hypothetica   | 3.16  | 0.9  | 1   | n/a  | n/a  | n/a | 0.95 |
|                           | hypothetica   | 1.07  | 0.08 | 1   | 0.99 | 0.11 | n/a | 0.86 |
|                           | putative mε   | 7.95  | 3.03 | 1   | n/a  | n/a  | n/a | 1.09 |
|                           | hypothetica   | 1.61  | 0.12 | 1   | 1.17 | 0.39 | n/a | 1.15 |
| staD                      | putative fir  | 13.92 | 1.38 | 1   | n/a  | n/a  | n/a | 0.93 |
|                           | Rhs-family    | 12.15 | 7.7  | 1   | n/a  | n/a  | n/a | 0.71 |
|                           | conserved     | 5.28  | 2.48 | 1   | n/a  | n/a  | n/a | 0.87 |
|                           | putative ba   | 5.01  | 0.62 | 1   | n/a  | n/a  | n/a | 0.73 |
|                           | putative DN   | 10.46 | 2.41 | 1   | n/a  | n/a  | n/a | 1.24 |
| vexC                      | Vi polysacc   | 19.41 | 3.4  | 1   | n/a  | n/a  | n/a | 1.08 |
|                           | putative mε   | 9.97  | 8.92 | 1   | n/a  | n/a  | n/a | 1.08 |
|                           | hypothetica   | 11.85 | 2.3  | 1   | n/a  | n/a  | n/a | 1.14 |
|                           | putative mε   | 1.6   | 0.12 | 1   | 1.23 | 0.13 | n/a | 1.04 |
|                           | putative reϕ  | 10.57 | 4.62 | 1   | n/a  | n/a  | n/a | 1.13 |
|                           | hypothetica   | 4.54  | 0.65 | 1   | n/a  | n/a  | n/a | 1.27 |
|                           | hypothetica   | 1     | 0.05 | 1   | 1.27 | 0.11 | n/a | 1.21 |
|                           | hypothetica   | 19.75 | 1.77 | 1   | n/a  | n/a  | n/a | 1.14 |
|                           | hypothetica   | 7.67  | 0.94 | 1   | n/a  | n/a  | n/a | 1.07 |
|                           | phage DN/     | 13.66 | 2.86 | 1   | n/a  | n/a  | n/a | 1.11 |
|                           | hypothetica   | 7.16  | 0.47 | 1   | n/a  | n/a  | n/a | 1.07 |
| mrcB                      | penicillin-bi | 0.96  | 0.13 | 1   | 1.07 | 0.18 | 1   | 1.07 |
| asnB                      | asparagine    | 0.85  | 0.07 | 1   | 0.92 | 0.13 | 1   | 0.91 |
| kdpE                      | KDP opero     | 0.91  | 0.1  | 1   | 0.89 | 0.08 | 1   | 0.98 |
|                           | putative mε   | 0.57  | 0.06 | 1   | 1.24 | 0.1  | 1   | 1.55 |
| cbiG                      | CbiG prote    | 1.01  | 0.06 | 1   | 0.84 | 0.08 | 1   | 0.95 |
| uhpB                      | two-compo     | 0.91  | 0.06 | 1   | 1.32 | 0.2  | 1   | 1.4  |
| ne protein                |               | 0.17  | 0.05 | 1   | 1.55 | 0.23 | 1   | n/a  |
| asnA                      | asparagine    | 0.89  | 0.03 | 1   | 1.5  | 0.06 | 1   | 1.61 |
|                           | putative gly  | 0.95  | 0.06 | 1   | 1.07 | 0.07 | 1   | 1.16 |



|                             |              |      |      |   |      |      |     |      |
|-----------------------------|--------------|------|------|---|------|------|-----|------|
| ilvI                        | acetolactat  | 0.93 | 0.09 | 1 | 0.98 | 0.13 | 1   | 0.95 |
|                             | putative sy  | 0.94 | 0.05 | 1 | 1.03 | 0.15 | 1   | 0.99 |
|                             |              | 0.1  | 0.02 | 1 | 1.2  | 0.47 | 1   | n/a  |
| arcB                        | aerobic res  | 0.92 | 0.1  | 1 | 1.03 | 0.17 | 1   | 1.32 |
| tldD                        | TldD protei  | 0.98 | 0.08 | 1 | 1.05 | 0.13 | 1   | 1.32 |
| cspE                        | cold shock   | 0.96 | 0.18 | 1 | 1.17 | 0.4  | 0   | 1.03 |
| otein                       |              | 0.14 | 0.05 | 1 | 0.83 | 0.14 | 1   | n/a  |
| glnS                        | glutaminyl-  | 0.97 | 0.13 | 1 | 0.96 | 0.04 | 1   | 0.98 |
|                             | conserved    | 0.98 | 0.08 | 1 | 0.82 | 0.16 | 1   | 0.82 |
| proS                        | prolyl-tRNA  | 0.93 | 0.08 | 1 | 1.06 | 0.13 | 1   | 0.91 |
|                             | putative re  | 1    | 0.15 | 1 | 0.73 | 0.2  | 1   | 0.83 |
| wcaC                        | putative gly | 0.9  | 0.13 | 1 | 1.1  | 0.46 | 1   | 0.89 |
| sthE                        |              | 0.92 | 0.11 | 1 | 1.19 | 0.2  | 1   | 1.08 |
| otein                       |              | 0.34 | 0.11 | 1 | 1.05 | 0.43 | 0   | n/a  |
| proB                        | glutamate t  | 0.89 | 0.08 | 1 | 1.08 | 0.45 | 1   | 0.94 |
| ar to tail fiber protein (g |              | 0.63 | 0.14 | 1 | 1.28 | 0.22 | 1   | n/a  |
| ne protein                  |              | 0.6  | 0.09 | 1 | 0.99 | 0.05 | 1   | 0.92 |
| peptide/nickel ABC-ty       |              | 0.09 | 0.03 | 1 | 1.04 | 0.12 | 1   | n/a  |
| virK                        | virulence p  | 0.89 | 0.09 | 1 | 1.15 | 0.07 | 1   | 1.34 |
| pipA                        | conserved    | 0.99 | 0.13 | 1 | 0.82 | 0.26 | 1   | 0.91 |
| yccD                        | conserved    | 1.08 | 0.13 | 1 | 0.92 | 0.28 | 0   | 0.83 |
|                             |              | 0.37 | 0.06 | 1 | 1    | 0.13 | n/a | n/a  |
|                             | conserved    | 0.95 | 0.1  | 1 | 1.04 | 0.07 | 1   | 1.26 |
| hpcC                        |              | 1.04 | 0.08 | 1 | 0.86 | 0.3  | 1   | 0.72 |
| fkpA                        | FKBP-type    | 0.81 | 0.14 | 1 | 1.2  | 0.13 | 1   | 1.4  |
| yrfA                        | conserved    | 0.84 | 0.05 | 1 | 1.1  | 0.12 | 1   | 1.23 |
|                             | putative se  | 0.96 | 0.1  | 1 | 1.1  | 0.43 | 0   | 0.84 |
| cedA                        | cell divisio | 0.98 | 0.12 | 1 | 1.26 | 0.39 | 0   | 0.82 |
|                             | conserved    | 1.08 | 0.1  | 1 | 0.86 | 0.18 | 1   | 0.73 |
| fabF                        | 3-oxoacyl-]  | 0.99 | 0.05 | 1 | 0.8  | 0.05 | 1   | 0.83 |
|                             | ABC trans    | 0.96 | 0.1  | 1 | 0.92 | 0.14 | 1   | 0.78 |
|                             | hypothetic   | 0.89 | 0.1  | 1 | 1.05 | 0.35 | 0   | 0.89 |
| yhhP                        | conserved    | 0.97 | 0.11 | 1 | 1.25 | 0.07 | 1   | 1.35 |
|                             |              | 0.12 | 0.03 | 1 | 0.92 | 0.13 | 1   | n/a  |
| nt transporter              |              | 0.13 | 0.04 | 1 | 1.27 | 0.15 | 1   | n/a  |
| pgi                         | glucose-6-]  | 0.81 | 0.06 | 1 | 1.27 | 0.22 | 1   | 1.22 |
| yjcC                        | putative ex  | 0.95 | 0.1  | 1 | 1.21 | 0.14 | 1   | 1.3  |
| melR                        | melibiose c  | 0.98 | 0.05 | 1 | 1.12 | 0.14 | 1   | 1.24 |
|                             | putative lip | 0.86 | 0.12 | 1 | 0.91 | 0.13 | 1   | 1.14 |
| aphA                        | class B aci  | 0.81 | 0.1  | 1 | 1.13 | 0.09 | 1   | 1.3  |
| yjcO                        | putative ex  | 0.97 | 0.11 | 1 | 1.19 | 0.1  | 1   | 1.33 |
| aspA                        | aspartate a  | 0.89 | 0.11 | 1 | 1.11 | 0.13 | 1   | 1.3  |
| artI                        | arginine-bir | 0.94 | 0.06 | 1 | 0.98 | 0.16 | 1   | 0.84 |
| live major tail protein     |              | 0.08 | 0.01 | 1 | 0.81 | 0.13 | 1   | n/a  |
|                             | prismane p   | 0.83 | 0.1  | 1 | 0.91 | 0.11 | 1   | 0.87 |
|                             | putative ca  | 0.84 | 0.05 | 1 | 1.29 | 0.14 | 1   | 1.27 |
| urein transglycosylase      |              | 0.11 | 0.02 | 1 | 1.22 | 0.14 | 1   | n/a  |
| rotein                      |              | 0.57 | 0.2  | 0 | 1.33 | 0.4  | 0   | n/a  |
| yjeJ                        | hypothetic   | 0.97 | 0.09 | 1 | 1.19 | 0.09 | 1   | 1.36 |
| potG                        | putrescine   | 1    | 0.08 | 1 | 0.85 | 0.11 | 1   | 0.8  |
|                             |              | 0.08 | 0.02 | 1 | 0.81 | 0.14 | n/a | n/a  |
| hemL                        | glutamate-   | 0.74 | 0.09 | 1 | 1.18 | 0.27 | 1   | 1.02 |

|                           |               |      |      |   |      |      |   |      |
|---------------------------|---------------|------|------|---|------|------|---|------|
| prpC                      | methylcitra   | 0.89 | 0.08 | 1 | 0.98 | 0.14 | 1 | 0.92 |
| aroH                      | 3-deoxy-D-    | 0.97 | 0.08 | 1 | 0.79 | 0.12 | 1 | 0.84 |
| ftnA                      | ferritin      | 1.13 | 0.23 | 0 | 1.37 | 0.39 | 0 | 0.88 |
| yedJ                      | conserved     | 0.93 | 0.11 | 1 | 0.75 | 0.07 | 1 | 0.86 |
| rscC                      | sensor prot   | 0.92 | 0.09 | 1 | 0.9  | 0.07 | 1 | 0.97 |
| phosphate-requiring en.   |               | 0.11 | 0.04 | 1 | 0.95 | 0.12 | 1 | n/a  |
| menF                      | isochorism    | 0.98 | 0.08 | 1 | 0.88 | 0.3  | 1 | 0.97 |
|                           | conserved     | 0.88 | 0.09 | 1 | 0.92 | 0.29 | 1 | 1.07 |
|                           | putative pr   | 0.93 | 0.1  | 1 | 0.73 | 0.12 | 1 | 0.88 |
| rpoS                      | RNA polym     | 0.93 | 0.1  | 1 | 1.29 | 0.35 | 1 | 1.32 |
| btuF                      | cobalamin     | 0.87 | 0.09 | 1 | 0.98 | 0.08 | 1 | 0.98 |
| ilar to integrase in phag |               | 0.12 | 0.03 | 1 | 0.94 | 0.1  | 1 | n/a  |
| btuC                      | vitamin B12   | 1.08 | 0.08 | 1 | 0.78 | 0.11 | 1 | 0.79 |
| mgsA                      | methylglyo:   | 0.91 | 0.09 | 1 | 0.85 | 0.14 | 1 | 0.86 |
| sprA                      | possible Ar   | 0.88 | 0.08 | 1 | 1.12 | 0.37 | 1 | 1.22 |
| cytR                      | transcriptio  | 0.99 | 0.06 | 1 | 1.24 | 0.06 | 1 | 1.44 |
| pgsA                      | phosphotid    | 0.92 | 0.09 | 1 | 0.82 | 0.07 | 1 | 0.78 |
| invG                      | secretory p   | 0.99 | 0.09 | 1 | 1.03 | 0.15 | 1 | 1.25 |
| sodB                      | superoxide    | 1.05 | 0.09 | 1 | 0.69 | 0.12 | 1 | 0.72 |
| csgA                      | major curlir  | 1.06 | 0.12 | 1 | 0.8  | 0.05 | 1 | 0.77 |
| mutM                      | formamido     | 0.9  | 0.07 | 1 | 1.34 | 0.11 | 1 | 1.39 |
| waaY                      | lipopolysac   | 0.82 | 0.09 | 1 | 1.46 | 0.15 | 1 | 1.48 |
|                           | putative ex   | 0.96 | 0.14 | 1 | 0.75 | 0.25 | 1 | 0.81 |
| fumA                      | Fumarate h    | 0.9  | 0.1  | 1 | 0.72 | 0.18 | 1 | 0.83 |
| dmsA2                     | putative dir  | 0.93 | 0.14 | 1 | 0.7  | 0.22 | 1 | 0.78 |
|                           | putative ca   | 0.9  | 0.08 | 1 | 1.34 | 0.25 | 1 | 1.37 |
|                           | possible hy   | 0.87 | 0.13 | 1 | 1.02 | 0.11 | 1 | 1.13 |
|                           | AraC-famil    | 0.93 | 0.11 | 1 | 0.97 | 0.11 | 1 | 1    |
|                           | putative inr  | 0.94 | 0.08 | 1 | 0.82 | 0.09 | 1 | 0.77 |
| sbcB                      | exodeoxyri    | 0.91 | 0.08 | 1 | 0.86 | 0.11 | 1 | 0.91 |
| ftsZ                      | cell divisio  | 0.91 | 0.1  | 1 | 1.17 | 0.38 | 1 | 1.08 |
| nuoG                      | NADH dehy     | 0.92 | 0.07 | 1 | 0.82 | 0.12 | 1 | 0.96 |
| gpt                       | xanthine-gu   | 0.93 | 0.09 | 1 | 0.93 | 0.08 | 1 | 0.98 |
| fliQ                      | flagellar bic | 1.04 | 0.21 | 0 | 1.21 | 0.09 | 0 | 0.87 |
|                           | putative req  | 0.83 | 0.1  | 1 | 0.73 | 0.11 | 1 | 0.79 |
| rpsG                      | 30S riboso    | 0.91 | 0.09 | 1 | 1.1  | 0.08 | 1 | 1.35 |
| yidY                      | putative me   | 0.78 | 0.1  | 1 | 1.27 | 0.09 | 1 | 1.36 |
| yail                      | conserved     | 0.85 | 0.13 | 1 | 1.06 | 0.1  | 1 | 0.94 |
| cyoC                      | cytochrome    | 0.88 | 0.13 | 1 | 1.17 | 0.26 | 1 | 1    |
|                           | putative so   | 0.92 | 0.06 | 1 | 1.08 | 0.09 | 1 | 1.23 |
|                           | conserved     | 0.96 | 0.12 | 1 | 0.8  | 0.03 | 1 | 0.96 |
| gatA                      | PTS system    | 0.64 | 0.12 | 1 | 1.13 | 0.13 | 1 | 1.34 |
| rotein                    |               | 0.8  | 0.13 | 1 | 0.96 | 0.31 | 0 | n/a  |
|                           | Orf 245 pr    | 1.04 | 0.11 | 1 | 0.68 | 0.16 | 1 | 0.91 |
| xseA                      | exodeoxyri    | 0.85 | 0.07 | 1 | 0.94 | 0.18 | 1 | 1.09 |
|                           | putative me   | 0.99 | 0.12 | 1 | 0.99 | 0.24 | 1 | 0.8  |
|                           | hypothetica   | 0.81 | 0.12 | 1 | 1.05 | 0.1  | 1 | 1.29 |
|                           | putative me   | 0.94 | 0.04 | 1 | 1.11 | 0.16 | 1 | 1.24 |
| ygjO                      | conserved     | 1    | 0.1  | 1 | 1.06 | 0.14 | 1 | 1.23 |
| yraN                      | conserved     | 1    | 0.11 | 1 | 1.22 | 0.19 | 1 | 1.28 |
| rotein                    |               | 0.19 | 0.04 | 1 | 1.14 | 0.08 | 1 | n/a  |
|                           | putative req  | 0.97 | 0.13 | 1 | 0.74 | 0.08 | 1 | 0.89 |

|                    |               |      |      |   |      |          |       |      |
|--------------------|---------------|------|------|---|------|----------|-------|------|
|                    | conserved     | 0.96 | 0.05 | 1 | 0.89 | 0.09     | 1     | 0.88 |
|                    | putative lipi | 0.92 | 0.04 | 1 | 0.95 | 0.25     | 1     | 1.03 |
| miaE               | tRNA hydr     | 0.89 | 0.07 | 1 | 1.09 | 0.09     | 1     | 1.31 |
| ygaE               | putative tra  | 0.93 | 0.1  | 1 | 1.01 | 0.1      | 1     | 1.2  |
| iadA               | probable is   | 0.88 | 0.07 | 1 | 1.2  | 0.25     | 1     | 1.21 |
| sthA               | putative fir  | 1    | 0.1  | 1 | 1.11 | 0.16     | 1     | 1.2  |
| se, alpha subunit  |               | 0.85 | 0.11 | 1 | 1.19 | 0.1      | 1     | 1.32 |
|                    | putative re   | 0.99 | 0.1  | 1 | 0.84 | 0.18     | 1     | 0.82 |
| sapB               | peptide tra   | 0.91 | 0.11 | 1 | 0.76 | 0.09     | 1     | 0.78 |
| rhaS               | L-rhamnos     | 0.96 | 0.11 | 1 | 1.41 | 0.16     | 1     | 1.44 |
| yihG               | putative ac   | 0.92 | 0.13 | 1 | 1.24 | 0.15     | 1     | 1.48 |
| ybhP               | conserved     | 0.99 | 0.05 | 1 | 0.86 | 0.2      | 1     | 0.91 |
| bioD               | dethiobiotir  | 0.96 | 0.1  | 1 | 0.93 | 0.09     | 1     | 0.82 |
| apaG               | CorD prote    | 0.92 | 0.06 | 1 | 1.03 | 0.07     | 1     | 1.09 |
| yiiG               | putative lipi | 0.89 | 0.05 | 1 | 1.2  | 0.18     | 1     | 1.53 |
| ybeA               | conserved     | 0.97 | 0.1  | 1 | 1.08 | 0.2      | 1     | 0.96 |
| gloB               | probable h    | 0.99 | 0.15 | 1 | 0.87 | 0.04     | 1     | 0.94 |
| aroA               | 3-phospho:    | 0.94 | 0.08 | 1 | 0.94 | 0.2      | 1     | 0.81 |
| argT               | lysine-argir  | 0.89 | 0.05 | 1 | 0.93 | 0.16     | 1     | 1.03 |
| smpA               | small prote   | 0.97 | 0.07 | 1 | 0.93 | 0.1      | 1     | 1.14 |
| citD2              | citrate lyas  | 1.03 | 0.13 | 1 | 1.08 | 0.13     | 1     | 0.86 |
|                    | hypothetica   | 1.05 | 0.2  | 1 | 1.32 | 0.29     | 0     | 0.89 |
|                    | hypothetica   | 0.81 | 0.11 | 0 | 1.01 | 0.67     | 0     | 0.89 |
| prlC               | oligopeptid   | 0.9  | 0.12 | 1 | 1.27 | 0.14     | 1     | 1.38 |
|                    |               | 0.91 | 0.08 | 1 | 0.92 | 0.1 n/a  |       | 0.87 |
| dcuR               | two-compo     | 0.91 | 0.16 | 1 | 1.1  | 0.15     | 1     | 1.38 |
| yecH               | conserved     | 0.87 | 0.09 | 1 | 0.74 | 0.07 n/a |       | 0.86 |
|                    | putative me   | 1    | 0.09 | 1 | 0.72 | 0.08     | 1     | 0.75 |
| rseC               | sigma-E fa    | 1.02 | 0.13 | 1 | 0.95 | 0.07     | 1     | 1.13 |
| csgG               | assembly/t    | 0.97 | 0.1  | 1 | 0.73 | 0.09     | 1     | 0.76 |
| barA               | sensor prot   | 0.93 | 0.13 | 1 | 1.13 | 0.12     | 1     | 1.23 |
| ne protein         |               | 0.32 | 0.03 | 1 | 0.98 | 0.23 n/a |       | 1.01 |
| amine biosynthesis |               | 0.75 | 0.16 | 0 | 1.26 | 0.21     | 0 n/a |      |
|                    | hypothetica   | 0.62 | 0.07 | 0 | 1.31 | 0.2      | 0     | 1.1  |
| ftsJ               | cell divisor  | 0.89 | 0.08 | 1 | 1.03 | 0.16     | 1     | 1.27 |
| pduQ               | putative pro  | 0.68 | 0.07 | 1 | 1.05 | 0.19     | 1     | 0.84 |
| nrfC               | cytochrome    | 1.07 | 0.07 | 1 | 1.06 | 0.06     | 1     | 1.1  |
| fliL               | FliL protein  | 0.87 | 0.04 | 1 | 0.91 | 0.16     | 1     | 0.85 |
| dcp                | dipeptidyl c  | 0.9  | 0.12 | 1 | 0.61 | 0.09     | 1     | 0.67 |
| btuB               | vitamin B1:   | 0.9  | 0.07 | 1 | 1.27 | 0.19     | 1     | 1.3  |
| ahpF               | alkyl hydro   | 0.92 | 0.11 | 1 | 0.98 | 0.02     | 1     | 0.85 |
| oppC               |               | 0.92 | 0.11 | 1 | 0.67 | 0.04     | 1     | 0.63 |
| ydeV               | putative su   | 0.91 | 0.11 | 1 | 1.31 | 0.17     | 1     | 1.36 |
| ysgA               | putative hy   | 0.96 | 0.13 | 1 | 1.35 | 0.19     | 1     | 1.22 |
| uvrD               | DNA helica    | 0.91 | 0.12 | 1 | 1.31 | 0.24     | 1     | 1.19 |
| yabF               | putative N/   | 0.82 | 0.14 | 1 | 1.2  | 0.11     | 1     | 1.09 |
|                    | conserved     | 0.87 | 0.09 | 1 | 1.23 | 0.11     | 1     | 1.3  |
| fliH               | flagellar as  | 0.83 | 0.07 | 1 | 0.77 | 0.05     | 1     | 0.8  |
| cysK               | cysteine sy   | 0.9  | 0.1  | 1 | 0.9  | 0.15     | 1     | 0.93 |
|                    |               | 0.91 | 0.06 | 1 | 0.99 | 0.15     | 1     | 0.99 |
|                    | hypothetica   | 1.01 | 0.03 | 1 | 0.74 | 0.11     | 1     | 0.76 |
|                    | conserved     | 0.83 | 0.06 | 1 | 1.05 | 0.2      | 1     | 1.15 |

|                       |               |      |      |   |      |          |       |      |
|-----------------------|---------------|------|------|---|------|----------|-------|------|
|                       | putative 6-φ  | 0.9  | 0.13 | 1 | 1.08 | 0.07     | 1     | 1.22 |
|                       | hypothetica   | 0.94 | 0.07 | 1 | 1.37 | 0.2      | 1     | 1.44 |
| flhE                  | flagellar pro | 0.93 | 0.05 | 1 | 0.8  | 0.09     | 1     | 0.83 |
|                       | putative me   | 1.02 | 0.03 | 1 | 0.69 | 0.08     | 1     | 0.78 |
|                       | hypothetica   | 0.61 | 0.05 | 1 | 0.88 | 0.55     | 1     | 0.84 |
| gdhA                  | glutamate c   | 0.83 | 0.16 | 1 | 0.65 | 0.17     | 1     | 0.86 |
| manX                  | PTS system    | 0.97 | 0.09 | 1 | 0.7  | 0.08     | 1     | 0.93 |
| pphA                  | serine/threi  | 0.89 | 0.11 | 1 | 0.77 | 0.12     | 1     | 0.82 |
| ntpA                  | DATP pyro     | 0.94 | 0.11 | 1 | 0.73 | 0.28     | 0     | 0.92 |
| artM                  | arginine tra  | 0.86 | 0.08 | 1 | 0.79 | 0.08     | 1     | 0.84 |
|                       | probable m    | 0.98 | 0.08 | 1 | 1.02 | 0.15     | 1     | 0.86 |
| aspC                  | aspartate a   | 0.87 | 0.09 | 1 | 0.83 | 0.04     | 1     | 0.86 |
| fepE                  |               | 0.89 | 0.09 | 1 | 1.08 | 0.24     | 1     | 0.93 |
| stbC                  | outer mem     | 0.85 | 0.08 | 1 | 1.06 | 0.12     | 1     | 1.1  |
|                       | putative an   | 0.95 | 0.12 | 1 | 0.71 | 0.11     | 1     | 0.72 |
| oppA                  | periplasmic   | 1.04 | 0.08 | 1 | 0.69 | 0.21     | 1     | 0.78 |
| hyaA                  |               | 1.01 | 0.08 | 1 | 0.72 | 0.04     | 1     | 0.86 |
|                       | conserved     | 0.96 | 0.07 | 1 | 0.79 | 0.19     | 1     | 0.88 |
|                       | probable p    | 0.88 | 0.04 | 1 | 0.73 | 0.07     | 1     | 0.76 |
|                       | putative ox   | 1.01 | 0.09 | 1 | 0.64 | 0.07     | 1     | 0.7  |
|                       | probable se   | 0.87 | 0.05 | 1 | 0.91 | 0.11     | 1     | 0.87 |
|                       | possible ar   | 0.9  | 0.05 | 1 | 1.06 | 0.17     | 1     | 1.21 |
|                       |               | 0.34 | 0.07 | 1 | 0.92 | 0.11 n/a | n/a   |      |
|                       | hypothetica   | 0.95 | 0.04 | 1 | 1.03 | 0.11     | 1     | 0.91 |
| secF                  | protein-exp   | 1.01 | 0.1  | 1 | 1.03 | 0.17     | 1     | 0.87 |
| hybB                  | probable h    | 0.92 | 0.12 | 1 | 1.06 | 0.11     | 1     | 1.11 |
| ygaD                  | conserved     | 0.97 | 0.08 | 1 | 1.04 | 0.29     | 1     | 1.07 |
|                       | putative lac  | 0.74 | 0.07 | 1 | 1.47 | 0.36     | 1     | 1.19 |
| ructose-6-phosphate a |               | 0.13 | 0.05 | 1 | 1.11 | 0.13     | 1 n/a |      |
|                       | putative be   | 0.75 | 0.08 | 1 | 1.32 | 0.13     | 1     | 1.34 |
| ne protein            |               | 0.13 | 0.04 | 1 | 1.11 | 0.16     | 1 n/a |      |
| ygeD                  | putative me   | 0.94 | 0.16 | 1 | 1.05 | 0.14     | 1     | 1.04 |
| tktA                  | transketola   | 0.82 | 0.1  | 1 | 1.05 | 0.16     | 1     | 1.2  |
| hycl                  | hydrogena     | 0.88 | 0.06 | 1 | 1.07 | 0.08     | 1     | 1.15 |
| yaF                   | conserved     | 0.93 | 0.06 | 1 | 1.32 | 0.1      | 1     | 1.39 |
| aldB                  | aldehyde d    | 0.93 | 0.04 | 1 | 1.3  | 0.12     | 1     | 1.2  |
|                       | putative tra  | 1.03 | 0.09 | 1 | 1.25 | 0.1      | 1     | 1.27 |
| fucR                  | l-fucose op   | 0.76 | 0.06 | 1 | 1.08 | 0.15     | 1     | 1.13 |
| stdA                  | probable fir  | 0.6  | 0.07 | 1 | 1    | 0.14     | 1     | 1.23 |
| lysP                  | lysine-spec   | 1.09 | 0.06 | 1 | 0.88 | 0.13     | 1     | 0.78 |
|                       |               | 0.07 | 0.01 | 1 | 0.75 | 0.11     | 1 n/a |      |
|                       | putative me   | 0.96 | 0.13 | 1 | 0.78 | 0.08     | 1     | 0.99 |
| dut                   | deoxyuridir   | 0.93 | 0.09 | 1 | 1.28 | 0.12     | 1     | 1.35 |
| rpIV                  | 50S riboso    | 0.9  | 0.07 | 1 | 1.19 | 0.05     | 1     | 1.42 |
| hflC                  | HflC protei   | 0.98 | 0.08 | 1 | 1.2  | 0.1      | 1     | 1.14 |
| rpIQ                  | 50S riboso    | 0.96 | 0.09 | 1 | 1.07 | 0.11     | 1     | 1.25 |
| ybjY                  | putative ex   | 0.98 | 0.11 | 1 | 0.9  | 0.09     | 1     | 0.79 |
| purA                  | adenylosuc    | 0.87 | 0.05 | 1 | 1.06 | 0.1      | 1     | 1.26 |
|                       | conserved     | 0.94 | 0.1  | 1 | 1.1  | 0.11     | 1     | 1.11 |
| hybA                  | hydrogena     | 0.95 | 0.08 | 1 | 1.06 | 1.01     | 1     | 1.22 |
| srlE                  | PTS system    | 0.94 | 0.1  | 1 | 1.06 | 0.92     | 1     | 1.14 |
|                       | hypothetica   | 1.03 | 0.06 | 1 | 1.08 | 0.09     | 1     | 1.04 |

|            |                       |      |      |   |      |       |     |      |
|------------|-----------------------|------|------|---|------|-------|-----|------|
| radA       | putative DN           | 0.95 | 0.1  | 1 | 1.17 | 0.11  | 1   | 1.11 |
| prt ATPase |                       | 0.1  | 0.03 | 1 | 0.95 | 0.14  | 1   | n/a  |
|            | putative ex           | 0.9  | 0.07 | 1 | 1.02 | 0.11  | 1   | 1.12 |
| yeiO       | sugar efflu:          | 0.97 | 0.07 | 1 | 0.87 | 0.06  | 1   | 0.83 |
| rfbH       | putative de           | 0.91 | 0.05 | 1 | 0.85 | 0.15  | 1   | 0.97 |
| rfbF       | glucose-1- $\pi$      | 1.1  | 0.08 | 1 | 0.82 | 0.09  | 1   | 0.95 |
| stcA       | putative fir          | 0.98 | 0.09 | 1 | 0.82 | 0.11  | 1   | 0.97 |
| narK       | nitrite extru         | 0.93 | 0.1  | 1 | 0.74 | 0.08  | 1   | 0.76 |
|            | putative ca           | 1.02 | 0.06 | 1 | 1.26 | 0.11  | 1   | 1.35 |
|            | putative me           | 1.07 | 0.09 | 1 | 1.14 | 0.12  | 1   | 1.31 |
|            | possible kir          | 1    | 0.12 | 1 | 1.16 | 0.19  | 1   | 1.24 |
|            | putative me           | 1.01 | 0.08 | 1 | 1.16 | 0.13  | 1   | 1.28 |
| sseE       | putative pa           | 1.05 | 0.08 | 1 | 0.64 | 0.06  | 1   | 0.79 |
| scsD       | secreted pr           | 0.98 | 0.12 | 1 | 0.83 | 0.1   | 1   | 0.8  |
| hutH       | histidine ar          | 0.92 | 0.13 | 1 | 1    | 0.17  | 1   | 0.79 |
| ybiS       | putative ex           | 1.01 | 0.1  | 1 | 0.89 | 9.64  | 1   | 0.79 |
| visB       | 2-octapren            | 0.9  | 0.11 | 1 | 1.09 | 0.09  | 1   | 1.1  |
| hpcB       | 3,4-dihydro           | 1    | 0.13 | 1 | 0.81 | 0.06  | 1   | 0.79 |
| hutI       | imidazoloni           | 0.94 | 0.09 | 1 | 0.98 | 0.07  | 1   | 0.72 |
|            | putative me           | 0.98 | 0.06 | 1 | 0.91 | 0.18  | 1   | 0.78 |
| ugtL       | putative me           | 1.04 | 0.08 | 1 | 0.84 | 0.22  | 1   | 0.8  |
|            | PTS-transp            | 1.02 | 0.09 | 1 | 1    | 0.12  | 1   | 1.26 |
|            | possible lip          | 0.99 | 0.05 | 1 | 1.08 | 0.09  | 1   | 1.31 |
| eutS       | putative eth          | 1.1  | 0.06 | 1 | 1    | 0.16  | 1   | 0.92 |
| pmrD       | polymyxin I           | 1.04 | 0.11 | 1 | 0.85 | 0.12  | 1   | 1    |
| glmU       | UDP-N-ace             | 0.95 | 0.06 | 1 | 1.33 | 0.04  | 1   | 1.23 |
| xseB       | exodeoxyri            | 0.98 | 0.1  | 1 | 1.04 | 0.16  | 1   | 1.09 |
| nrdH       | putative glu          | 0.81 | 0.08 | 1 | 0.95 | 0.1   | 1   | 1.03 |
|            | conserved             | 0.95 | 0.15 | 1 | 0.95 | 0.09  | 1   | 0.93 |
| mp         | oxaloacetate decar    | 0.46 | 0.07 | 1 | 1.01 | 0.04  | n/a | n/a  |
| rplX       | 50S riboso            | 0.94 | 0.12 | 1 | 1.16 | 0.07  | 1   | 1.46 |
| rpsQ       | 30S riboso            | 0.87 | 0.1  | 1 | 1.16 | 0.15  | 1   | 1.39 |
| ytfH       | conserved             | 0.89 | 0.13 | 1 | 1.11 | 0.08  | 1   | 1.17 |
| yehE       | conserved             | 0.97 | 0.11 | 1 | 0.87 | 0.16  | 1   | 0.88 |
| araH       |                       | 0.62 | 0.1  | 1 | 0.75 | 0.06  | 1   | 0.78 |
|            | putative lipi         | 1    | 0.05 | 1 | 0.79 | 0.05  | 1   | 0.77 |
| yfiM       | conserved             | 1.04 | 0.08 | 1 | 0.97 | 0.13  | 1   | 1.11 |
|            | conserved             | 1.15 | 0.08 | 1 | 0.64 | 0.05  | 1   | 0.76 |
| ame        | stops relative to E.  | 0.83 | 0.12 | 1 | 1.11 | 15.31 | 0   | n/a  |
| rpmE       | 50S riboso            | 1.08 | 0.11 | 1 | 1.25 | 0.05  | 1   | 1.47 |
|            | hypothetica           | 0.87 | 0.1  | 1 | 1.16 | 0.16  | 1   | 1.43 |
| clpX       | ATP-deper             | 1.03 | 0.05 | 1 | 0.98 | 0.04  | 1   | 0.87 |
|            | conserved             | 0.94 | 0.03 | 1 | 0.74 | 0.19  | 1   | 0.81 |
|            | conserved             | 1.04 | 0.14 | 1 | 0.74 | 0.13  | 1   | 0.82 |
| ar         | to genes in P2-like p | 0.59 | 0.1  | 1 | 0.95 | 0.05  | 1   | 0.96 |
| rof        | ROF protei            | 1.1  | 0.33 | 0 | 1.34 | 0.34  | 0   | 1.26 |
|            | putative me           | 0.98 | 0.06 | 1 | 1.04 | 0.09  | 1   | 1.2  |
| ccmD1      | heme expo             | 1.04 | 0.16 | 0 | 1.45 | 0.22  | n/a | 0.85 |
|            | hypothetica           | 0.98 | 0.19 | 1 | 1.29 | 0.35  | 0   | 0.96 |
|            | hypothetica           | 1.01 | 0.11 | 1 | 1.06 | 0.39  | 0   | 0.77 |
|            | hypothetica           | 0.98 | 0.08 | 0 | 1.42 | 0.2   | 0   | 1    |
|            | conserved             | 1.02 | 0.1  | 1 | 0.73 | 0.26  | 1   | 0.83 |

|                           |              |       |      |      |      |      |      |      |
|---------------------------|--------------|-------|------|------|------|------|------|------|
| rotein                    | 0.97         | 0.12  | 1    | 0.78 | 0.04 | 1    | n/a  |      |
|                           | 0.04         | 0.01  | 1    | 0.6  | 0.07 | n/a  | n/a  |      |
| IS200-like                | 0.1          | 0.02  | 1    | 0.62 | 0.11 | n/a  | n/a  |      |
| ssembly                   | 0.02         | 0.01  | 1    | 0.62 | 0.04 | n/a  | n/a  |      |
| ulence: hydrophilic proi  | 0.03         | 0.01  | 1    | 0.66 | 0.07 | n/a  | n/a  |      |
| ssembly                   | 0.03         | 0.01  | 1    | 0.64 | 0.04 | n/a  | n/a  |      |
| raie; major fimbrial subi | 0.04         | 0.01  | 1    | 0.63 | 0.07 | n/a  | n/a  |      |
|                           | n/a          | n/a   | n/a  | n/a  | n/a  | n/a  | n/a  |      |
|                           | n/a          | n/a   | n/a  | n/a  | n/a  | n/a  | n/a  |      |
|                           | n/a          | n/a   | n/a  | n/a  | n/a  | n/a  | n/a  |      |
|                           | n/a          | n/a   | n/a  | n/a  | n/a  | n/a  | n/a  |      |
|                           | n/a          | n/a   | n/a  | n/a  | n/a  | n/a  | n/a  |      |
|                           | n/a          | n/a   | n/a  | n/a  | n/a  | n/a  | n/a  |      |
|                           | 0.12         | 0.08  | 1    | 0.86 | 0.21 | n/a  | n/a  |      |
| PTR2-fami                 | 0.94         | 0.09  | 1    | 0.9  | 0.11 | 1    | 0.75 |      |
|                           | 1.02         | 0.09  | 1    | 0.94 | 0.06 | n/a  | 0.89 |      |
| hypothetica               | 1.05         | 0.09  | 1    | 0.86 | 0.09 | 1    | 0.65 |      |
|                           | 0.09         | 0.03  | 1    | 0.85 | 0.11 | n/a  | n/a  |      |
|                           | 0.98         | 0.09  | 1    | 0.86 | 0.09 | n/a  | 0.81 |      |
| hypothetica               | 16.64        | 7.13  | 1    | n/a  | n/a  | n/a  | 0.86 |      |
| possible ex               | 3.27         | 0.7   | 1    | 1.27 | 0.21 | n/a  | 1.14 |      |
| putative ex               | 13.82        | 2.37  | 1    | n/a  | n/a  | n/a  | 0.96 |      |
| ratC                      | conserved    | 1.78  | 0.2  | 1    | 0.91 | 0.03 | n/a  | 0.93 |
| sipD                      | pathogenic   | 1.47  | 0.17 | 1    | 1.04 | 0.15 | n/a  | 1.17 |
| staB                      | chaperone    | 10.83 | 1.99 | 1    | n/a  | n/a  | n/a  | 0.98 |
|                           | putative m   | 4.35  | 0.4  | 1    | n/a  | n/a  | n/a  | 0.78 |
|                           | hypothetica  | 15.75 | 1.8  | 1    | n/a  | n/a  | n/a  | 0.86 |
|                           |              | 1.21  | 0.11 | 1    | 0.96 | 0.06 | n/a  | 0.97 |
|                           | conserved    | 5.27  | 1.27 | 1    | n/a  | n/a  | n/a  | 1.05 |
|                           | hypothetica  | 2.86  | 0.48 | 1    | n/a  | n/a  | n/a  | 0.82 |
| safA                      | probable lip | 3.79  | 1.01 | 1    | n/a  | n/a  | n/a  | 0.89 |
|                           | putative ex  | 10.4  | 3.59 | 1    | n/a  | n/a  | n/a  | 0.92 |
|                           | putative pe  | 6.52  | 2.16 | 1    | n/a  | n/a  | n/a  | 0.85 |
|                           | putative ba  | 4.93  | 1.05 | 1    | n/a  | n/a  | n/a  | 1.12 |
|                           | hypothetica  | 6.77  | 4.51 | 1    | n/a  | n/a  | n/a  | 0.72 |
|                           | hypothetica  | 4.4   | 0.64 | 1    | n/a  | n/a  | n/a  | 0.77 |
|                           | hypothetica  | 15.93 | 5.73 | 1    | n/a  | n/a  | n/a  | 0.7  |
|                           | conserved    | 5.56  | 0.58 | 1    | n/a  | n/a  | n/a  | 0.99 |
|                           | putative sh  | 1.25  | 0.07 | 1    | 1.36 | 0.09 | n/a  | 1.22 |
|                           | hypothetica  | 5.9   | 0.44 | 1    | n/a  | n/a  | n/a  | 0.74 |
|                           | hypothetica  | 10.28 | 3.74 | 1    | n/a  | n/a  | n/a  | 0.78 |
|                           | hypothetica  | 21.41 | 4.44 | 1    | n/a  | n/a  | n/a  | 0.7  |
|                           | putative ba  | 11.79 | 2.56 | 1    | n/a  | n/a  | n/a  | 0.67 |
|                           | hypothetica  | 8.39  | 0.47 | 1    | n/a  | n/a  | n/a  | 1.09 |
|                           | hypothetica  | 6.51  | 1.1  | 1    | n/a  | n/a  | n/a  | 1.35 |
|                           | putative m   | 22.89 | 2.18 | 1    | n/a  | n/a  | n/a  | 1.09 |
|                           | conserved    | 18.88 | 2.84 | 1    | n/a  | n/a  | n/a  | 1.05 |
|                           | putative re  | 2.17  | 0.19 | 1    | 0.96 | 0.07 | n/a  | 1.06 |
|                           | conserved    | 7.18  | 1.11 | 1    | n/a  | n/a  | n/a  | 1.17 |
|                           | putative ph  | 1.91  | 0.12 | 1    | 0.93 | 0.15 | n/a  | 1.05 |
|                           | putative ex  | 5.99  | 1.89 | 1    | n/a  | n/a  | n/a  | 1.18 |
| pilP                      | pilus assen  | 17.1  | 3.13 | 1    | n/a  | n/a  | n/a  | 1.08 |

|                             |               |       |      |   |      |      |     |      |
|-----------------------------|---------------|-------|------|---|------|------|-----|------|
|                             | putative me   | 39.61 | 7.98 | 1 | n/a  | n/a  | n/a | 1.09 |
|                             | putative me   | 17.17 | 3.52 | 1 | n/a  | n/a  | n/a | 1.05 |
| samB                        | UV protecti   | 3.83  | 0.42 | 1 | n/a  | n/a  | n/a | 1.11 |
| sulA                        | cell divisor  | 0.93  | 0.08 | 1 | 0.85 | 0.1  | 1   | 0.83 |
| malG                        | maltose tra   | 0.82  | 0.03 | 1 | 1.31 | 0.2  | 1   | 1.23 |
| hofC                        | protein trar  | 0.89  | 0.07 | 1 | 1.12 | 0.21 | 1   | 0.96 |
| yadH                        | ABC transp    | 1     | 0.06 | 1 | 1.1  | 0.13 | 1   | 0.91 |
| fhuC                        | ferrichrome   | 0.9   | 0.07 | 1 | 1.12 | 0.16 | 1   | 0.94 |
| yaeE                        | putative AE   | 1     | 0.11 | 1 | 1.05 | 0.12 | 1   | 0.93 |
| yhdA                        | putative lipi | 0.96  | 0.1  | 1 | 1.23 | 0.27 | 1   | 1.26 |
|                             | putative sig  | 0.88  | 0.03 | 1 | 1.03 | 0.15 | 1   | 0.86 |
| nagB                        | glucosamir    | 0.98  | 0.07 | 1 | 1.1  | 0.11 | 1   | 0.94 |
| perone                      |               | 0.14  | 0.02 | 1 | 1.42 | 0.41 | 1   | n/a  |
| rpmH                        | 50s ribosor   | 1.06  | 0.12 | 0 | 1.34 | 0.23 | 0   | 1.13 |
|                             | probable P    | 1.07  | 0.1  | 1 | 1.34 | 0.09 | 1   | 1.29 |
| ron protein                 |               | 0.12  | 0.02 | 1 | 1.35 | 0.17 | 1   | n/a  |
|                             | conserved     | 0.95  | 0.05 | 1 | 1.33 | 0.11 | 1   | 1.44 |
| rbsB                        | D-ribose-bi   | 1.01  | 0.1  | 1 | 1.39 | 0.07 | 1   | 1.45 |
| waaL                        | O-antigen I   | 0.84  | 0.09 | 1 | 1.42 | 0.08 | 1   | 1.53 |
| ompH                        | outer mem     | 1.03  | 0.08 | 1 | 1.14 | 0.23 | 1   | 1.08 |
| ftsL                        | cell divisor  | 0.92  | 0.09 | 1 | 1.1  | 0.12 | 1   | 1.02 |
|                             |               | 0.28  | 0.05 | 1 | 1.05 | 0.13 | 1   | n/a  |
| ygaF                        | putative G/   | 0.91  | 0.09 | 1 | 1.12 | 0.15 | 1   | 1.11 |
|                             | putative se   | 0.99  | 0.07 | 1 | 0.8  | 0.12 | 1   | 0.76 |
| rpID                        | 50S ribosol   | 1.03  | 0.08 | 1 | 1.24 | 0.1  | 1   | 1.28 |
| yhfL                        | conserved     | 0.96  | 0.2  | 1 | 1.19 | 0.28 | 1   | 1.05 |
|                             | conserved     | 0.95  | 0.08 | 1 | 1.26 | 0.13 | 1   | 1.24 |
| rotein                      |               | 0.89  | 0.07 | 1 | 1.34 | 0.29 | 0   | n/a  |
| yheT                        |               | 0.85  | 0.06 | 1 | 1.23 | 0.12 | 1   | 1.23 |
|                             | heat shock    | 0.94  | 0.05 | 1 | 1.2  | 0.18 | 1   | 1.23 |
|                             | putative lipi | 1.02  | 0.08 | 1 | 1.1  | 0.18 | 1   | 0.9  |
|                             | putative req  | 1     | 0.06 | 1 | 0.87 | 0.07 | 1   | 0.85 |
| wza                         | putative po   | 0.91  | 0.08 | 1 | 1    | 0.22 | 1   | 0.96 |
| osphate-binding protei      |               | 0.09  | 0.02 | 1 | 1.35 | 0.16 | 1   | n/a  |
| ugpC                        | sn-Glycero    | 0.8   | 0.06 | 1 | 1.32 | 0.15 | 1   | 1.06 |
| asmA                        | putative ou   | 1.08  | 0.07 | 1 | 0.9  | 0.05 | 1   | 0.83 |
|                             | putative ph   | 1.05  | 0.15 | 1 | 1.14 | 0.25 | 1   | 1.16 |
|                             | hypothetica   | 0.94  | 0.24 | 1 | 1.07 | 0.11 | 1   | 0.79 |
| dinP                        | hypothetica   | 1.03  | 0.12 | 1 | 1.03 | 0.07 | 1   | 1    |
| wcaD                        |               | 0.95  | 0.07 | 1 | 0.89 | 0.04 | 1   | 0.95 |
| rotein                      |               | 0.34  | 0.09 | 1 | 0.97 | 0.22 | 1   | n/a  |
| ar to int protein in phag   |               | 0.12  | 0.04 | 1 | 1.13 | 0.15 | 1   | n/a  |
| ate aminotransferase        |               | 0.08  | 0.02 | 1 | 1.01 | 1.98 | 1   | n/a  |
| t specificity protein J, pl |               | 0.04  | 0.01 | 1 | 0.88 | 0.14 | 1   | n/a  |
|                             | putative tra  | 0.79  | 0.12 | 1 | 0.92 | 0.16 | 1   | 0.69 |
|                             | putative tet  | 0.94  | 0.11 | 1 | 0.99 | 0.11 | 1   | 0.83 |
|                             |               | 0.35  | 0.07 | 0 | 1.05 | 0.26 | 0   | n/a  |
| live phage tail compone     |               | 0.09  | 0.02 | 1 | 0.93 | 0.04 | 1   | n/a  |
|                             | putative ox   | 0.99  | 0.07 | 1 | 1.01 | 0.11 | 1   | 0.79 |
|                             | putative L-c  | 0.93  | 0.06 | 1 | 0.91 | 0.11 | 1   | 1.12 |
| ilar to transpose           |               | 0.16  | 0.04 | 1 | 0.93 | 0.33 | 1   | n/a  |
| guaB                        | inosine-5'-r  | 0.92  | 0.07 | 1 | 0.94 | 0.09 | 1   | 0.9  |

|                         |                                            |      |      |   |      |      |     |      |
|-------------------------|--------------------------------------------|------|------|---|------|------|-----|------|
| ycaQ                    |                                            | 0.86 | 0.08 | 1 | 0.77 | 0.11 | 1   | 0.81 |
| sembles Clp protease    |                                            | 0.08 | 0.03 | 1 | 0.92 | 0.14 | 1   | n/a  |
| rotein                  |                                            | 0.14 | 0.02 | 1 | 1.28 | 0.14 | 1   | n/a  |
| hycC                    | formate hydrolase                          | 0.91 | 0.06 | 1 | 1.13 | 0.24 | 1   | 1.06 |
|                         | conserved                                  | 0.97 | 0.12 | 1 | 1.19 | 0.23 | 1   | 1.16 |
| tktB                    | transketolase                              | 0.99 | 0.05 | 1 | 0.91 | 0.21 | 1   | 0.95 |
| clpA                    | ATP-dependent protease                     | 1.03 | 0.08 | 1 | 0.97 | 0.15 | 1   | 0.77 |
|                         | conserved                                  | 1.35 | 0.35 | 0 | 1.17 | 0.52 | 0   | 0.75 |
| able minor tail protein |                                            | 0.09 | 0.01 | 1 | 0.83 | 0.16 | 1   | n/a  |
| tein                    |                                            | 0.12 | 0.03 | 1 | 1.27 | 0.19 | 1   | n/a  |
| yjbN                    | conserved                                  | 0.93 | 0.07 | 1 | 1.36 | 0.23 | 1   | 1.26 |
|                         | hypothetical                               | 1    | 0.14 | 1 | 1.29 | 0.24 | 1   | 1.12 |
| nuoL                    | NADH dehydrogenase                         | 0.93 | 0.05 | 1 | 0.85 | 0.14 | 1   | 0.72 |
|                         | putative subunit                           | 0.96 | 0.16 | 1 | 0.91 | 0.13 | 1   | 0.92 |
| agp                     | glucose-1-phosphatase                      | 1.08 | 0.11 | 1 | 0.83 | 0.06 | 1   | 0.88 |
|                         | putative ACP                               | 0.84 | 0.07 | 1 | 0.73 | 0.1  | 1   | 0.83 |
| cbpA                    | curved DNA-binding protein                 | 1.08 | 0.09 | 1 | 0.79 | 0.11 | 1   | 0.75 |
| fabA                    | D-3-hydroxyacyl-CoA synthase               | 1.07 | 0.07 | 1 | 0.83 | 0.04 | 1   | 0.83 |
| sinI                    | putative exoenzyme                         | 0.82 | 0.07 | 1 | 1.04 | 0.1  | 1   | 1.14 |
| bcfF                    | fimbrial subunit                           | 0.88 | 0.08 | 1 | 1.2  | 0.22 | 1   | 1.25 |
|                         | putative membrane protein                  | 1.02 | 0.11 | 1 | 0.84 | 0.09 | 1   | 0.81 |
| sopA                    |                                            | 0.87 | 0.07 | 1 | 0.97 | 0.16 | 1   | 0.85 |
|                         |                                            | 1.02 | 0.09 | 1 | 0.91 | 0.15 | 1   | 0.94 |
|                         |                                            | 0.9  | 0.11 | 1 | 0.86 | 0.06 | 1   | 0.78 |
|                         | putative transmembrane protein             | 1.06 | 0.13 | 1 | 0.8  | 0.17 | 1   | 0.85 |
|                         | putative transmembrane protein             | 0.95 | 0.07 | 1 | 0.95 | 0.13 | 1   | 0.91 |
|                         | putative receptor                          | 0.84 | 0.08 | 1 | 0.97 | 0.1  | 1   | 0.88 |
|                         | conserved                                  | 0.96 | 0.1  | 1 | 0.97 | 0.1  | 1   | 0.96 |
| rluC                    | ribosomal L16                              | 0.88 | 0.04 | 1 | 0.97 | 0.15 | 1   | 0.81 |
| flgB                    | putative flagellin                         | 0.73 | 0.06 | 1 | 0.9  | 0.11 | 1   | 0.79 |
| fusA                    | elongation factor                          | 1    | 0.05 | 1 | 1.3  | 0.21 | 1   | 1.32 |
| stbA                    | probable fibronectin-binding protein       | 0.91 | 0.09 | 1 | 1.23 | 0.31 | 1   | 0.98 |
| ygbK                    | conserved                                  | 0.98 | 0.06 | 1 | 1.11 | 0.09 | 1   | 0.96 |
| cyoB                    | cytochrome b                               | 0.99 | 0.1  | 1 | 1    | 0.12 | 1   | 0.9  |
|                         | putative membrane protein                  | 1.06 | 0.14 | 1 | 1.21 | 0.13 | 1   | 1.09 |
| metA                    | homoserine methyltransferase               | 1    | 0.07 | 1 | 1.21 | 0.18 | 1   | 1.11 |
| yacF                    | conserved                                  | 1.04 | 0.12 | 1 | 1.15 | 0.23 | 1   | 0.99 |
| pqaB                    | melittin resistance protein                | 0.98 | 0.06 | 1 | 0.87 | 0.05 | 1   | 0.87 |
| transport protein       |                                            | 0.11 | 0.04 | 1 | 0.94 | 0.24 | 1   | n/a  |
| nemA                    | N-ethylmaleimide-sensitive cytochrome b    | 0.99 | 0.09 | 1 | 0.92 | 0.33 | 1   | 0.78 |
| brnQ                    | branched chain amino acid aminotransferase | 1.03 | 0.08 | 1 | 1.02 | 0.09 | 1   | 0.88 |
|                         | putative phosphatase                       | 0.93 | 0.11 | 1 | 0.85 | 0.11 | n/a | 0.82 |
| malF                    | maltose transport protein                  | 0.95 | 0.07 | 1 | 1.2  | 0.32 | 1   | 1.19 |
| proA                    | gamma-glutamyl aminotransferase            | 0.84 | 0.06 | 1 | 1.05 | 0.19 | 1   | 0.83 |
| speE                    | spermidine synthase                        | 0.92 | 0.11 | 1 | 1.19 | 0.11 | 1   | 1.01 |
|                         | conserved                                  | 0.92 | 0.08 | 1 | 0.91 | 0.16 | 1   | 0.81 |
| glk                     | glucokinase                                | 0.97 | 0.1  | 1 | 0.89 | 0.13 | 1   | 0.96 |
| menB                    | naphthoate reductase                       | 0.93 | 0.08 | 1 | 0.98 | 0.2  | 1   | 0.89 |
|                         | conserved                                  | 1.12 | 0.15 | 1 | 1.02 | 0.09 | 1   | 0.95 |
| suhB                    | extragenic silencing factor                | 1.06 | 0.09 | 1 | 1.01 | 0.18 | 1   | 1.08 |
|                         | putative exoenzyme                         | 1.07 | 0.05 | 1 | 1.19 | 0.26 | 1   | 1.38 |
| ybbF                    | conserved                                  | 0.98 | 0.11 | 1 | 0.96 | 0.08 | 1   | 0.89 |



|                          |              |      |      |      |      |      |     |      |
|--------------------------|--------------|------|------|------|------|------|-----|------|
| ilar to phage tail compo | 0.1          | 0.02 | 1    | 0.9  | 0.06 | 1    | n/a |      |
| ilar to DNA packaging p  | 0.18         | 0.03 | 1    | 1.27 | 0.2  | 1    | n/a |      |
|                          | conserved    | 0.95 | 0.08 | 1    | 1.21 | 0.16 | 1   | 1.18 |
| gpsA                     | glycerol-3-φ | 0.98 | 0.02 | 1    | 1.27 | 0.1  | 1   | 1.44 |
|                          | putative me  | 1.02 | 0.08 | 1    | 1.24 | 0.11 | 1   | 1.32 |
| malP                     | maltodextri  | 0.99 | 0.07 | 1    | 1.23 | 0.19 | 1   | 1.25 |
|                          | putative ior | 1.01 | 0.07 | 1    | 1.04 | 0.14 | 1   | 1.02 |
| dapE                     | succinyl-di  | 0.99 | 0.12 | 1    | 1.02 | 0.18 | 1   | 0.99 |
| lrp                      | leucine-res  | 1.03 | 0.07 | 1    | 0.91 | 0.12 | 1   | 0.83 |
| ybdG                     | putative me  | 1.01 | 0.09 | 1    | 1.02 | 0.14 | 1   | 0.9  |
| yjga                     | conserved    | 0.95 | 0.08 | 1    | 1.33 | 0.17 | 1   | 1.17 |
| dnaT                     | primosoma    | 0.91 | 0.07 | 1    | 1.19 | 0.07 | n/a | 1.07 |
| rph                      | RNase PH     | 0.93 | 0.13 | 1    | 1.42 | 0.2  | 1   | 1.42 |
| mug                      | G/U mism     | 0.99 | 0.11 | 1    | 1.22 | 0.15 | 1   | 1.22 |
|                          | PTS syste    | 0.95 | 0.09 | 1    | 1.19 | 0.2  | 1   | 1.31 |
|                          | conserved    | 0.93 | 0.06 | 1    | 1.39 | 0.39 | 1   | 1.24 |
| for hsdM and hsdR        |              | 0.42 | 0.11 | 1    | 1.13 | 0.24 | 1   | 0.99 |
| ilvH                     | acetolactat  | 1    | 0.07 | 1    | 1.13 | 0.16 | 1   | 0.88 |
| spaR                     | secretory p  | 1.05 | 0.06 | 1    | 1.05 | 0.14 | 1   | 1.13 |
| sucA                     | 2-oxoglutar  | 1.05 | 0.04 | 1    | 1.07 | 0.11 | 1   | 0.87 |
| melB                     | melibiose c  | 0.99 | 0.1  | 1    | 1.25 | 0.1  | 1   | 1.11 |
| yfjA                     | 16S rRNA     | 0.99 | 0.08 | 1    | 1.08 | 0.1  | 1   | 1.03 |
| asrC                     | anaerobic s  | 1.07 | 0.1  | 1    | 0.97 | 0.06 | 1   | 0.98 |
| hisD                     | histidinol d | 0.91 | 0.04 | 1    | 0.83 | 0.23 | 1   | 0.86 |
| phoE                     | outer mem    | 0.97 | 0.05 | 1    | 0.99 | 0.09 | 1   | 0.94 |
| ushA                     |              | 0.98 | 0.06 | 1    | 1.1  | 0.16 | 1   | 0.85 |
| pyrD                     | dihydroorot  | 1    | 0.06 | 1    | 1    | 0.11 | 1   | 0.72 |
| phoN                     | nonspecific  | 0.87 | 0.1  | 1    | 1.33 | 0.16 | 1   | 1.2  |
| sbp                      | periplasmic  | 0.82 | 0.07 | 1    | 1.37 | 0.26 | 1   | 1.28 |
|                          | conserved    | 0.96 | 0.12 | 1    | 1.13 | 0.12 | 1   | 0.83 |
|                          | putative po  | 1.03 | 0.05 | 1    | 0.99 | 0.06 | 1   | 0.87 |
| pduB                     | putative pr  | 0.95 | 0.07 | 1    | 0.95 | 0.34 | 1   | 0.84 |
|                          | putative ex  | 0.93 | 0.06 | 1    | 1.07 | 0.19 | 1   | 1.16 |
|                          | putative AE  | 0.92 | 0.09 | 1    | 1.02 | 0.17 | 1   | 0.83 |
|                          | putative tra | 0.93 | 0.07 | 1    | 0.82 | 0.15 | 1   | 0.72 |
|                          |              | 0.93 | 0.1  | 1    | 1.16 | 0.16 | n/a | 1.25 |
| citC2                    | [citrate (PR | 0.85 | 0.09 | 1    | 1.13 | 0.15 | 1   | 0.99 |
| rotein                   |              | 0.99 | 0.32 | 0    | 1.31 | 0.54 | 0   | 0.74 |
| purH                     | phosphorib   | 0.79 | 0.1  | 1    | 1.22 | 0.34 | 1   | 1.23 |
| yfhl                     | peptidase E  | 0.95 | 0.08 | 1    | 1.06 | 0.18 | 1   | 0.99 |
| pduE                     | diol dehydr  | 1.01 | 0.06 | 1    | 0.91 | 0.21 | 1   | 0.95 |
| dcuB                     | anaerobic (  | 1.01 | 0.01 | 1    | 1.09 | 0.1  | 1   | 1.13 |
|                          | conserved    | 1.01 | 0.06 | 1    | 0.74 | 0.08 | 1   | 0.72 |
| fabG                     | 3-oxoacyl-[  | 0.98 | 0.11 | 1    | 0.9  | 0.11 | 1   | 0.7  |
|                          | conserved    | 1.08 | 0.1  | 1    | 0.76 | 0.08 | 1   | 0.75 |
| pheA                     | chorismate   | 0.85 | 0.06 | 1    | 1.04 | 0.13 | 1   | 1.09 |
| yaaA                     | conserved    | 0.98 | 0.06 | 1    | 1.24 | 0.13 | 1   | 1.15 |
|                          | putative De  | 0.99 | 0.08 | 1    | 1.36 | 0.16 | 1   | 1.24 |
|                          | hypothetica  | 0.92 | 0.1  | 1    | 0.9  | 0.37 | 1   | 0.81 |
| fdoG                     | formate de   | 1    | 0.09 | 1    | 1.31 | 0.22 | 1   | 1.26 |
| yigN                     | putative me  | 0.97 | 0.09 | 1    | 1.3  | 0.35 | 1   | 1.27 |
| hemX                     | uroporphyr   | 0.87 | 0.05 | 1    | 1.53 | 0.31 | 1   | 1.18 |

|            |                     |      |      |   |      |          |       |      |
|------------|---------------------|------|------|---|------|----------|-------|------|
| fba        | fructose 1,6        | 0.98 | 0.06 | 1 | 1.11 | 0.09     | 1     | 1.16 |
| fliM       | flagellar mo        | 0.98 | 0.08 | 1 | 0.81 | 0.06     | 1     | 0.92 |
| cysZ       | putative su         | 1.05 | 0.05 | 1 | 0.91 | 0.1 n/a  |       | 0.94 |
| hyaD       | hydrogenas          | 1.01 | 0.08 | 1 | 0.73 | 0.11     | 1     | 0.76 |
| nusA       | L factor            | 0.9  | 0.06 | 1 | 1.14 | 0.08     | 1     | 1.35 |
| sdaC       | putative se         | 1.03 | 0.05 | 1 | 1.18 | 0.21     | 1     | 1.13 |
|            | possible int        | 1.09 | 0.09 | 1 | 1.33 | 0.06     | 1     | 1.2  |
| tatC       | sec-indepe          | 1.06 | 0.08 | 1 | 1.33 | 0.34     | 1     | 1.16 |
| recQ       | ATP-deper           | 0.88 | 0.12 | 1 | 1.28 | 0.16     | 1     | 1.27 |
| yigI       | conserved           | 1.03 | 0.09 | 1 | 1.35 | 0.32     | 1     | 1.21 |
| hemH       | ferrochelate        | 0.95 | 0.08 | 1 | 1.13 | 0.22     | 1     | 0.85 |
| tufB       | elongation          | 0.96 | 0.04 | 1 | 1.11 | 0.28 n/a |       | 1.23 |
| fliG       | flagellar mo        | 0.9  | 0.08 | 1 | 0.91 | 0.19     | 1     | 0.83 |
| cysI       | sulfite redu        | 0.7  | 0.06 | 1 | 1.07 | 0.16     | 1     | 1.12 |
| ppdB       | prepilin pe         | 0.85 | 0.09 | 1 | 0.98 | 0.16     | 1     | 1.03 |
| pspE       | phage shor          | 1.06 | 0.11 | 1 | 0.9  | 0.27     | 1     | 0.77 |
|            | putative me         | 1    | 0.09 | 1 | 0.93 | 0.15     | 1     | 0.84 |
|            | conserved           | 1.03 | 0.06 | 1 | 0.98 | 0.22     | 1     | 0.77 |
| ne protein |                     | 0.11 | 0.01 | 1 | 0.99 | 0.18     | 1 n/a |      |
|            | putative arr        | 1    | 0.1  | 1 | 0.77 | 0.08     | 1     | 0.74 |
| ribA       | GTP cyclot          | 1.04 | 0.06 | 1 | 0.89 | 0.07     | 1     | 0.79 |
| narI       | respiratory         | 1    | 0.12 | 1 | 0.73 | 0.06     | 1     | 0.69 |
|            | putative Na         | 1    | 0.09 | 1 | 0.74 | 0.06     | 1     | 0.79 |
|            | putative me         | 1.08 | 0.12 | 1 | 0.71 | 1.13     | 1     | 0.77 |
|            |                     | 0.89 | 0.11 | 1 | 0.81 | 0.2      | 1     | 0.91 |
| cutC       | putative co         | 1.1  | 0.09 | 1 | 0.92 | 0.24     | 1     | 0.83 |
| gsk        | inosine-gua         | 0.97 | 0.08 | 1 | 1.06 | 0.15     | 1     | 0.88 |
| hyaF2      | hydrogenas          | 0.97 | 0.07 | 1 | 0.72 | 0.07     | 1     | 0.76 |
|            | putative re         | 1    | 0.08 | 1 | 0.76 | 0.04     | 1     | 0.72 |
| pflB       | formate ac          | 0.99 | 0.09 | 1 | 0.93 | 0.11     | 1     | 0.85 |
| citF       | citrate lyas        | 0.92 | 0.04 | 1 | 1.27 | 0.15     | 1     | 0.87 |
|            | putative se         | 1.14 | 0.04 | 1 | 0.81 | 0.1      | 1     | 0.75 |
| srfB       | putative vir        | 0.94 | 0.05 | 1 | 0.81 | 0.12     | 1     | 0.78 |
| gor        | glutathione         | 0.91 | 0.03 | 1 | 1.28 | 0.11     | 1     | 1.24 |
|            |                     | 1.01 | 0.07 | 1 | 1.42 | 0.15     | 1     | 1.22 |
| ne protein |                     | 0.26 | 0.07 | 1 | 1.12 | 0.14     | 1 n/a |      |
| dfp        | conserved           | 0.97 | 0.05 | 1 | 1.33 | 0.17     | 1     | 1.24 |
| relA       | GTP pyrop           | 0.94 | 0.04 | 1 | 1.17 | 0.11     | 1     | 1.03 |
|            | hypothetica         | 1.12 | 0.09 | 1 | 1.06 | 0.21     | 1     | 1.12 |
|            | possible ef         | 0.95 | 0.06 | 1 | 1.05 | 0.1      | 1     | 0.85 |
| otein      |                     | 0.82 | 0.1  | 1 | 1.05 | 0.08     | 1     | 0.72 |
| amtB       | probable ai         | 1.05 | 0.06 | 1 | 1.01 | 0.1      | 1     | 0.76 |
|            | , ribokinase family | 0.16 | 0.05 | 1 | 1.24 | 0.27     | 1 n/a |      |
| xylB       | xylulose kir        | 1.01 | 0.11 | 1 | 1.34 | 0.15     | 1     | 1.14 |
| sapB       | putative au         | 0.82 | 0.06 | 1 | 1.28 | 0.13     | 1     | 1.31 |
| yjFY       | conserved           | 0.76 | 0.14 | 1 | 1.25 | 0.16     | 1     | 1.18 |
| aroL       | shikimate k         | 1.04 | 0.04 | 1 | 1.22 | 0.19     | 1     | 0.92 |
|            | putative ox         | 0.93 | 0.04 | 1 | 1.05 | 0.19     | 1     | 0.92 |
| metC       | beta-cystat         | 0.93 | 0.03 | 1 | 1.18 | 0.1 n/a  |       | 1.21 |
| hycG       | formate hy          | 0.98 | 0.06 | 1 | 1.09 | 0.27     | 1     | 1.09 |
| malS       | alpha-amyl          | 0.87 | 0.05 | 1 | 1.35 | 0.22     | 1     | 1.22 |
|            | conserved           | 0.94 | 0.11 | 1 | 1.39 | 0.24     | 1     | 1.32 |

|                           |                        |      |      |   |      |          |       |      |
|---------------------------|------------------------|------|------|---|------|----------|-------|------|
|                           | conserved              | 0.75 | 0.06 | 1 | 1.19 | 0.09     | 1     | 1.23 |
|                           | putative me            | 0.92 | 0.1  | 1 | 1.08 | 0.17     | 1     | 1.26 |
| foxA                      | ferrioxamin            | 1.01 | 0.05 | 1 | 1.12 | 0.08     | 1     | 0.85 |
|                           | conserved              | 1.14 | 0.07 | 1 | 1.08 | 0.1      | 1     | 1.08 |
| yeiE                      | putative tra           | 1.04 | 0.06 | 1 | 0.95 | 0.06     | 1     | 0.76 |
|                           | r to 3rd module of ATP | 0.51 | 0.07 | 1 | 1.03 | 0.11     | 1     | 0.89 |
| cdd                       | cytidine de            | 1    | 0.09 | 1 | 0.96 | 0.15     | 1     | 0.87 |
| rfbN                      | putative rho           | 1.02 | 0.09 | 1 | 1.2  | 0.27     | 0     | 1.03 |
| fbaB                      | fructose-bis           | 0.92 | 0.1  | 1 | 0.86 | 0.1      | 1     | 0.91 |
| yohl                      | conserved              | 0.91 | 0.06 | 1 | 0.86 | 0.14     | 1     | 0.83 |
| rpsK                      | 30S riboso             | 0.98 | 0.02 | 1 | 1.19 | 0.13     | 1     | 1.29 |
| fcl                       | GDP-fucos              | 0.94 | 0.06 | 1 | 0.93 | 0.16     | 1     | 0.85 |
| dld                       | D-lactate d            | 0.97 | 0.07 | 1 | 0.91 | 0.16     | 1     | 0.85 |
|                           | conserved              | 0.9  | 0.05 | 1 | 1.09 | 0.11     | 1     | 1.07 |
| yhjU                      | putative me            | 1.02 | 0.06 | 1 | 1.27 | 0.18     | 1     | 1.35 |
|                           | putative ac            | 0.94 | 0.08 | 1 | 1.28 | 0.29     | 1     | 1.15 |
| murA                      | UDP-N-ace              | 0.99 | 0.06 | 1 | 1.24 | 0.14     | 1     | 1.13 |
| sgaA                      | probable st            | 0.6  | 0.11 | 1 | 1.2  | 0.36     | 1     | 1.02 |
|                           | conserved              | 1    | 0.09 | 1 | 1.24 | 0.16     | 1     | 1.09 |
| creA                      | conserved              | 1    | 0.07 | 1 | 1.23 | 0.07     | 1     | 1.14 |
| gmk                       | 5'guanylate            | 0.94 | 0.1  | 1 | 1.34 | 0.16     | 1     | 1.42 |
|                           | conserved              | 1.04 | 0.14 | 1 | 0.97 | 0.16     | 1     | 1.35 |
|                           | putative ex            | 1.02 | 0.05 | 1 | 1.15 | 0.1      | 1     | 1.14 |
| degS                      | serine prot            | 1.05 | 0.07 | 1 | 1.13 | 0.06     | 1     | 1.32 |
| gatR                      | galactitol u           | 1.04 | 0.07 | 1 | 1.08 | 0.11     | 1     | 1.28 |
|                           | probable m             | 1.06 | 0.06 | 1 | 1.08 | 0.13     | 1     | 1.16 |
| pagP                      | antimicrobi            | 0.87 | 0.07 | 1 | 1.07 | 0.12     | 1     | 0.86 |
| hpt                       | hypoxanthi             | 0.94 | 0.1  | 1 | 1.16 | 0.16     | 1     | 1.03 |
|                           |                        | 1.08 | 0.09 | 1 | 0.91 | 0.13     | 1     | 0.92 |
| yjeA                      | lysyl-tRNA             | 0.96 | 0.05 | 1 | 1.24 | 0.26     | 1     | 1.16 |
| sseG                      | putative pa            | 0.86 | 0.07 | 1 | 0.81 | 0.05     | 1     | 0.77 |
|                           | putative me            | 1.02 | 0.03 | 1 | 0.68 | 0.08     | 1     | 0.63 |
| pha subunit               |                        | 0.15 | 0.02 | 1 | 0.99 | 0.47     | 1 n/a |      |
|                           | putative me            | 1    | 0.07 | 1 | 0.91 | 0.19     | 1     | 0.67 |
| fer flavoprotein beta sul |                        | 0.1  | 0.02 | 1 | 0.93 | 0.15     | 1 n/a |      |
| rotein                    |                        | 1.14 | 0.15 | 1 | 1.13 | 0.17     | 1 n/a |      |
| one lyase                 |                        | 0.21 | 0.07 | 1 | 1.18 | 0.28     | 1 n/a |      |
| rpmE2                     | putative 50            | 0.97 | 0.09 | 1 | 1.06 | 0.11     | 1     | 0.9  |
| yqcC                      | conserved              | 0.86 | 0.05 | 1 | 1.03 | 0.15     | 1     | 1.22 |
|                           | hypothetica            | 0.91 | 0.04 | 1 | 1.18 | 0.08 n/a |       | 1.07 |
| stop following codon 2:   |                        | 0.92 | 0.05 | 1 | 0.84 | 0.12     | 1 n/a |      |
|                           | putative me            | 1.12 | 0.05 | 1 | 1.18 | 0.08     | 1     | 1.01 |
| ne protein                |                        | 0.11 | 0.06 | 1 | 1.37 | 0.12     | 1 n/a |      |
|                           | putative me            | 1.05 | 0.07 | 1 | 1.34 | 0.11     | 1     | 1.17 |
| 2-binding sugar transpo   |                        | 0.08 | 0.03 | 1 | 0.81 | 0.04     | 1 n/a |      |
| rpmD                      | 50S riboso             | 0.92 | 0.06 | 1 | 1.2  | 0.24     | 1     | 1.24 |
| able regulatory protein   |                        | 0.14 | 0.03 | 1 | 0.92 | 0.12 n/a | n/a   |      |
|                           | hypothetica            | 1.05 | 0.09 | 1 | 1.16 | 0.18     | 1     | 0.92 |
|                           | conserved              | 0.94 | 0.15 | 1 | 0.75 | 0.12     | 1     | 0.86 |
|                           | putative ph            | 1.26 | 0.13 | 1 | 1.07 | 0.24     | 1     | 0.95 |
| citD                      | citrate lyas           | 1.04 | 0.04 | 1 | 1.08 | 0.11     | 1     | 0.8  |
| infA                      | initiation fa          | 1.09 | 0.12 | 1 | 0.94 | 0.06     | 1     | 0.74 |

|                            |              |       |       |       |      |          |       |      |
|----------------------------|--------------|-------|-------|-------|------|----------|-------|------|
| nucE2                      | possible se  | 1.19  | 0.12  | 1     | 1    | 0.17     | 1     | 1.02 |
| yacE                       | conserved    | 0.99  | 0.09  | 1     | 1.12 | 0.08     | 1     | 0.99 |
|                            | probable lip | 0.85  | 0.07  | 1     | 1.02 | 0.16     | 1     | 0.84 |
| panC                       | pantoate:bi  | 0.87  | 0.07  | 1     | 1.09 | 0.2      | 1     | 0.94 |
| yaiA                       | conserved    | 0.93  | 0.09  | 1     | 1    | 0.18     | 1     | 0.84 |
|                            | conserved    | 0.92  | 0.08  | 1     | 1.12 | 0.11     | 1     | 1    |
|                            | conserved    | 1.03  | 0.08  | 1     | 1.46 | 0.43     | 0     | 1.14 |
|                            | putative se  | 1.06  | 0.07  | 1     | 0.82 | 0.1      | 1     | 0.79 |
|                            | putative lip | 1.03  | 0.06  | 1     | 0.71 | 0.11     | 1     | 0.76 |
| rpmJ2                      | putative 50  | 1.03  | 0.1   | 1     | 1.12 | 0.48     | 0     | 0.92 |
|                            | conserved    | 1.08  | 0.11  | 1     | 0.93 | 0.32     | 0     | 0.9  |
| rpsV                       | 30S riboso   | 1.01  | 0.08  | 1     | 0.94 | 0.56     | 1     | 0.68 |
| ybhT                       | putative ex  | 1.14  | 0.14  | 1     | 1.06 | 0.36     | 1     | 0.73 |
| ulence: regulation of s    |              | 0.05  | 0.03  | 1     | 0.75 | 0.1 n/a  | n/a   |      |
| mbrial synthesis           |              | 0.05  | 0.01  | 1     | 0.68 | 0.09 n/a | n/a   |      |
|                            |              | 0.22  | 0.15  | 1     | 0.85 | 0.24 n/a | n/a   |      |
| urface exclusion           |              | 0.06  | 0.02  | 1     | 0.78 | 0.15 n/a | n/a   |      |
| in A                       |              | 0.04  | 0.01  | 1     | 0.78 | 0.11 n/a | n/a   |      |
| ssembly                    |              | 0.03  | 0.01  | 1     | 0.71 | 0.07 n/a | n/a   |      |
|                            | n/a          | n/a   | n/a   | n/a   | n/a  | n/a      | n/a   |      |
|                            | n/a          | n/a   | n/a   | n/a   | n/a  | n/a      | n/a   |      |
|                            | n/a          | n/a   | n/a   | n/a   | n/a  | n/a      | n/a   |      |
|                            | n/a          | n/a   | n/a   | n/a   | n/a  | n/a      | n/a   |      |
|                            | n/a          | n/a   | n/a   | n/a   | n/a  | n/a      | n/a   |      |
|                            | n/a          | n/a   | n/a   | n/a   | n/a  | n/a      | n/a   |      |
| ar to invertase (pin) in p |              | 0.37  | 0.08  | 1     | 1.02 | 0.15     | 1 n/a |      |
|                            |              | 0.08  | 0.02  | 1     | 0.86 | 0.07 n/a | n/a   |      |
| ase subunits of ATP-d      |              | 0.09  | 0.02  | 1     | 0.93 | 0.07     | 1 n/a |      |
|                            |              | 1.04  | 0.04  | 1     | 1.17 | 0.1 n/a  |       | 1.01 |
|                            |              | 0.93  | 0.11  | 1     | 1.17 | 0.14 n/a |       | 1.14 |
|                            |              | 0.06  | 0.02  | 1     | 0.94 | 0.11 n/a | n/a   |      |
|                            | hypothetica  | 6.87  | 4.4   | 1 n/a | n/a  | n/a      |       | 0.75 |
|                            | hypothetica  | 7.22  | 1.73  | 1 n/a | n/a  | n/a      |       | 0.82 |
|                            | putative me  | 13.53 | 3.8   | 1 n/a | n/a  | n/a      |       | 0.67 |
|                            | putative ba  | 12.36 | 6.42  | 1 n/a | n/a  | n/a      |       | 0.74 |
|                            | conserved    | 17.24 | 10.73 | 1 n/a | n/a  | n/a      |       | 0.71 |
|                            | putative ba  | 17    | 3.63  | 1 n/a | n/a  | n/a      |       | 0.8  |
|                            | hypothetica  | 15.65 | 4.35  | 1 n/a | n/a  | n/a      |       | 0.7  |
|                            | hypothetica  | 17.17 | 4.69  | 1 n/a | n/a  | n/a      |       | 0.67 |
|                            | outer mem    | 1.39  | 0.07  | 1     | 0.74 | 0.14 n/a |       | 0.71 |
|                            | putative DN  | 10.95 | 1.86  | 1 n/a | n/a  | n/a      |       | 0.81 |
|                            | putative ba  | 19.44 | 4.55  | 1 n/a | n/a  | n/a      |       | 0.71 |
|                            | hypothetica  | 12.39 | 5.68  | 1 n/a | n/a  | n/a      |       | 1.06 |
|                            | putative DN  | 6.21  | 2.16  | 1 n/a | n/a  | n/a      |       | 0.76 |
|                            | putative pr  | 3.74  | 0.35  | 1 n/a | n/a  | n/a      |       | 0.73 |
|                            | putative ba  | 12.98 | 4.01  | 1 n/a | n/a  | n/a      |       | 0.7  |
|                            | hypothetica  | 9.06  | 4.12  | 1 n/a | n/a  | n/a      |       | 0.7  |
|                            | hypothetica  | 2.21  | 0.45  | 1 n/a | n/a  | n/a      |       | 1.16 |
| oadB                       | oxaloaceta   | 1.04  | 0.05  | 1     | 1.06 | 0.06 n/a |       | 0.89 |
|                            |              | 1.07  | 0.11  | 1     | 0.7  | 0.15 n/a |       | 0.63 |
|                            | putative ba  | 15.2  | 3.51  | 1 n/a | n/a  | n/a      |       | 0.77 |
|                            | putative ba  | 17.86 | 4.64  | 1 n/a | n/a  | n/a      |       | 0.78 |



|                      |               |      |      |   |      |      |     |      |
|----------------------|---------------|------|------|---|------|------|-----|------|
| creC                 | putative tw   | 0.98 | 0.1  | 1 | 1.13 | 0.22 | 1   | 1.11 |
|                      | hypothetica   | 1.1  | 0.07 | 1 | 0.94 | 0.16 | 1   | 0.83 |
| g domain             |               | 0.3  | 0.06 | 1 | 0.93 | 0.28 | 1   | n/a  |
|                      | gab protein   | 1.01 | 0.06 | 1 | 1.23 | 0.25 | 1   | 1.2  |
| copS                 | histidine kir | 0.91 | 0.08 | 1 | 0.97 | 0.24 | 1   | 0.85 |
|                      | putative 3-l  | 1.07 | 0.12 | 1 | 0.81 | 0.14 | 1   | 0.92 |
| yfeH                 | putative me   | 1    | 0.11 | 1 | 0.91 | 0.25 | 1   | 0.95 |
|                      | putative ex   | 0.96 | 0.14 | 1 | 1    | 0.06 | 1   | 1.17 |
|                      | conserved     | 1.06 | 0.17 | 1 | 0.93 | 0.22 | 1   | 0.95 |
| rpsA                 | 30S riboso    | 1.04 | 0.18 | 1 | 0.94 | 0.16 | 1   | 0.89 |
|                      | putative ba   | 0.58 | 0.06 | 1 | 0.87 | 0.1  | n/a | 0.89 |
| aat                  | leucyl/pher   | 1    | 0.07 | 1 | 0.97 | 0.29 | 1   | 0.83 |
|                      | putative se   | 1.01 | 0.14 | 1 | 0.92 | 0.07 | 1   | 1.02 |
| ygjN                 | conserved     | 1.1  | 0.16 | 1 | 1.29 | 0.26 | 1   | 1.26 |
| talC                 | putative tra  | 0.92 | 0.14 | 1 | 1.32 | 0.29 | 0   | 1.45 |
|                      | hypothetica   | 0.98 | 0.07 | 0 | 1.08 | 0.45 | 0   | 1.17 |
|                      | FxA prote     | 0.93 | 0.13 | 1 | 1.22 | 0.1  | 1   | 1.19 |
| purC                 | phosphorib    | 0.93 | 0.1  | 1 | 0.93 | 0.05 | 1   | 0.96 |
| sseB                 | SseB prote    | 0.98 | 0.05 | 1 | 1    | 0.11 | 1   | 1    |
|                      | putative PT   | 1.09 | 0.1  | 1 | 0.97 | 0.1  | 1   | 0.99 |
|                      | alcohol de    | 0.96 | 0.17 | 1 | 1.4  | 0.21 | 1   | 1.58 |
| glpK                 | glycerol kin  | 1    | 0.11 | 1 | 1.32 | 0.21 | 1   | 1.29 |
| argB                 | acetylgluta   | 0.95 | 0.06 | 1 | 1.24 | 0.15 | 1   | 1.22 |
| glpA                 | anaerobic g   | 1.07 | 0.09 | 1 | 0.8  | 0.09 | 1   | 0.97 |
| ne protein           |               | 0.15 | 0.05 | 1 | 1.06 | 0.13 | 1   | n/a  |
| hsdR                 | subunit R c   | 0.83 | 0.07 | 1 | 1.11 | 0.2  | 1   | 1.23 |
| motB                 | motility pro  | 1.09 | 0.15 | 1 | 0.76 | 0.11 | 1   | 0.88 |
|                      | putative me   | 1.06 | 0.18 | 1 | 0.71 | 0.17 | 1   | 0.78 |
| prpD                 | PrpD prote    | 0.86 | 0.12 | 1 | 1.05 | 0.25 | 1   | 1.07 |
| lexA                 | LexA repre    | 1.07 | 0.16 | 1 | 1.11 | 0.14 | 1   | 1.17 |
| sitA                 | Iron transp   | 1.04 | 0.19 | 1 | 1.1  | 0.18 | 1   | 1.26 |
| slyB                 | outer mem     | 1.31 | 0.23 | 1 | 0.81 | 0.4  | 0   | 0.86 |
| cycA                 | D-serine/D-   | 1    | 0.16 | 1 | 1.04 | 0.17 | 1   | 1.13 |
| ie                   |               | 0.07 | 0.02 | 1 | 1.16 | 0.15 | 1   | n/a  |
|                      | putative Bg   | 0.96 | 0.14 | 1 | 1.14 | 0.06 | 1   | 1.14 |
| cpdB                 | 2',3'-cyclic- | 1.02 | 0.07 | 1 | 1.21 | 3.65 | 1   | 1.34 |
|                      |               | 0.07 | 0.02 | 1 | 1.15 | 0.73 | 1   | n/a  |
| treB                 | PTS system    | 0.73 | 0.12 | 1 | 1.19 | 0.12 | 1   | 1.15 |
| on enzyme, methylase |               | 0.04 | 0.01 | 1 | 1.16 | 0.1  | 1   | n/a  |
| e                    |               | 0.13 | 0.01 | 1 | 1.3  | 0.66 | 1   | n/a  |
|                      | putative inr  | 1.03 | 0.08 | 1 | 0.79 | 0.1  | 1   | 0.77 |
|                      | putative AE   | 1.01 | 0.15 | 1 | 0.71 | 0.17 | 1   | 0.71 |
| dsdX                 | DsdX perm     | 0.96 | 0.1  | 1 | 1.51 | 0.18 | 1   | 1.38 |
| torS                 | Two-compr     | 1.02 | 0.11 | 1 | 1.4  | 0.36 | 1   | 1.4  |
|                      | probable te   | 1.03 | 0.09 | 1 | 0.98 | 0.18 | 1   | 0.94 |
| fixC                 | FixC protei   | 0.93 | 0.14 | 1 | 1.1  | 0.08 | 1   | 1.12 |
| pdhR                 | pyruvate de   | 0.98 | 0.22 | 1 | 1.08 | 0.11 | 1   | 1.08 |
| dinF                 | putative DN   | 1.06 | 0.16 | 1 | 1.18 | 0.11 | 1   | 1.2  |
| lrhA                 | NADH dehy     | 0.99 | 0.19 | 1 | 0.83 | 0.08 | 1   | 0.96 |
| btuD                 | vitamin B12   | 1.19 | 0.17 | 1 | 1.01 | 0.48 | 1   | 0.78 |
| ybjG                 | putative pe   | 1.08 | 0.2  | 1 | 0.88 | 0.04 | 1   | 0.9  |
|                      | putative fer  | 1.01 | 0.14 | 1 | 0.96 | 0.23 | 1   | 0.86 |

|                           |               |      |      |   |      |      |   |      |
|---------------------------|---------------|------|------|---|------|------|---|------|
| dmsA1                     | putative dir  | 1.03 | 0.17 | 1 | 0.76 | 0.11 | 1 | 0.73 |
|                           | conserved     | 1.08 | 0.09 | 1 | 0.85 | 0.13 | 1 | 0.66 |
|                           | hypothetica   | 0.99 | 0.08 | 1 | 1.44 | 1.46 | 1 | 1.43 |
|                           | putative tra  | 1.05 | 0.11 | 1 | 1.05 | 0.18 | 1 | 1    |
| queA                      | S-adenosyl    | 1.07 | 0.07 | 1 | 1.14 | 0.26 | 1 | 0.93 |
|                           | conserved     | 0.91 | 0.07 | 1 | 1.15 | 0.29 | 1 | 1.23 |
| truA                      | tRNA pseu     | 1.02 | 0.12 | 1 | 0.97 | 0.19 | 1 | 1.01 |
|                           | possible tra  | 0.94 | 0.1  | 1 | 1.05 | 0.26 | 1 | 1.03 |
|                           | putative po   | 0.98 | 0.18 | 1 | 1.07 | 0.18 | 1 | 0.98 |
| mdlA                      | putative AE   | 1.02 | 0.11 | 1 | 1.04 | 0.74 | 1 | 0.87 |
| ykgB                      | putative me   | 1.07 | 0.08 | 1 | 0.94 | 0.07 | 1 | 0.81 |
|                           | putative me   | 0.98 | 0.24 | 1 | 0.94 | 0.56 | 0 | 1.02 |
| msrA                      | peptide me    | 0.89 | 0.15 | 1 | 1.06 | 0.12 | 1 | 1.2  |
| holC                      | DNA polym     | 1.04 | 0.1  | 1 | 1.18 | 0.45 | 0 | 1.08 |
| yfiF                      | putative RN   | 1.04 | 0.16 | 1 | 1.01 | 0.11 | 1 | 1.03 |
|                           | putative ex   | 1.02 | 0.21 | 1 | 1    | 0.16 | 1 | 1.28 |
| tdcE                      | probable fc   | 1.08 | 0.17 | 1 | 1.17 | 0.14 | 1 | 1.24 |
|                           | putative pro  | 0.93 | 0.18 | 1 | 1.04 | 0.1  | 1 | 1.29 |
| metJ                      | repressor c   | 1.07 | 0.09 | 0 | 1.44 | 0.45 | 0 | 1.09 |
| icyltransferase           |               | 0.79 | 0.11 | 1 | 0.71 | 0.07 | 1 | 0.86 |
|                           | putative me   | 1.13 | 0.12 | 1 | 1.03 | 0.2  | 1 | 0.99 |
| gabD                      | succinate-s   | 0.97 | 0.06 | 1 | 1.11 | 0.17 | 1 | 1.23 |
| ilar to head-tail preconn |               | 0.06 | 0.01 | 1 | 1.07 | 0.24 | 1 | n/a  |
| rseA                      | sigma-E fa    | 0.97 | 0.13 | 1 | 1.03 | 0.06 | 1 | 1.06 |
| fotransferase             |               | 0.95 | 0.1  | 1 | 1.16 | 0.15 | 1 | 1.39 |
| yhjO                      | putative po   | 0.96 | 0.08 | 1 | 1.25 | 0.18 | 1 | 1.29 |
|                           | conserved     | 1.18 | 0.2  | 1 | 1.21 | 0.28 | 1 | 1.42 |
| yscR                      | putative typ  | 1.02 | 0.15 | 1 | 0.68 | 0.06 | 1 | 0.75 |
| purM                      | phosphorib    | 0.91 | 0.16 | 1 | 1.1  | 0.2  | 1 | 0.93 |
| putP                      | sodium/pro    | 0.97 | 0.17 | 1 | 0.79 | 0.13 | 1 | 0.7  |
| nrdF                      | ribonucleos   | 1.04 | 0.13 | 1 | 1.23 | 0.12 | 1 | 1.18 |
|                           | hypothetica   | 1.03 | 0.09 | 1 | 1    | 0.05 | 1 | 0.92 |
| sipA                      | pathogenic    | 1    | 0.16 | 1 | 1    | 0.13 | 1 | 1.22 |
| envZ                      | two-compo     | 0.96 | 0.09 | 1 | 1.26 | 0.15 | 1 | 1.25 |
| sapC                      | peptide tra   | 1.17 | 0.15 | 1 | 1.02 | 0.35 | 1 | 0.79 |
| rhaB                      | rhamnuloki    | 0.96 | 0.13 | 1 | 1.3  | 0.21 | 1 | 1.35 |
| fimY                      | fimbriae Y    | 1    | 0.2  | 1 | 1.07 | 0.25 | 1 | 0.86 |
| sifA                      | putative vir  | 0.92 | 0.13 | 1 | 0.78 | 0.17 | 1 | 0.78 |
| pyrC                      | dihydroorot   | 0.93 | 0.05 | 1 | 0.88 | 0.17 | 1 | 0.87 |
| fic                       | cell filamer  | 0.9  | 0.13 | 1 | 1.18 | 0.12 | 1 | 1.13 |
| fdhD                      | FdhD prote    | 0.9  | 0.09 | 1 | 1.22 | 0.2  | 1 | 1.46 |
| pbpA                      | penicillin-bi | 0.96 | 0.16 | 1 | 0.94 | 0.08 | 1 | 0.92 |
| yafC                      | hypothetica   | 0.89 | 0.16 | 1 | 1.08 | 0.21 | 1 | 1.08 |
| ain NADH dehydrogenase    |               | 0.86 | 0.11 | 1 | 0.74 | 0.98 | 1 | 0.73 |
| sipC                      | pathogenic    | 0.98 | 0.12 | 1 | 1.07 | 0.11 | 1 | 1.19 |
| flgN                      | flagella syn  | 1.03 | 0.12 | 1 | 0.76 | 0.28 | 0 | 0.78 |
| uvrA                      | excision nu   | 0.95 | 0.12 | 1 | 1.28 | 0.13 | 1 | 1.35 |
| smpB                      | SsrA (tmRI    | 1.12 | 0.17 | 1 | 0.98 | 0.14 | 1 | 1.1  |
|                           | putative se   | 1.01 | 0.21 | 1 | 1.05 | 0.13 | 1 | 1.15 |
| coaA                      | pantothena    | 1.08 | 0.19 | 1 | 1.3  | 0.43 | 1 | 1.38 |
|                           | hypothetica   | 1.11 | 0.22 | 0 | 1.61 | 0.36 | 0 | 0.92 |
| atpD                      | ATP synthe    | 1.03 | 0.19 | 1 | 1.4  | 0.14 | 1 | 1.51 |

|                            |              |      |      |   |      |      |       |      |
|----------------------------|--------------|------|------|---|------|------|-------|------|
| sbcC                       | exonucleas   | 0.95 | 0.11 | 1 | 0.99 | 0.18 | 1     | 1.01 |
| spaQ                       | secretory p  | 0.97 | 0.13 | 0 | 1.35 | 0.35 | 0     | 1.22 |
| phsB                       | thiosulfate  | 1.15 | 0.22 | 1 | 0.94 | 0.21 | 1     | 0.81 |
| cheB                       | protein-glut | 1.09 | 0.11 | 1 | 0.74 | 0.09 | 1     | 0.85 |
|                            | conserved    | 1.27 | 0.1  | 1 | 0.66 | 0.3  | 1     | 0.7  |
| ssrB                       | putative tw  | 1.1  | 0.09 | 1 | 0.95 | 0.31 | 1     | 0.84 |
| waaG                       | lipopolysac  | 0.96 | 0.17 | 1 | 1.41 | 0.1  | 1     | 1.38 |
|                            | probable s   | 0.88 | 0.14 | 0 | 1.01 | 0.47 | 0     | 0.89 |
| thiF                       | thiamine bi  | 0.61 | 0.08 | 1 | 1.4  | 0.31 | 1     | 1.26 |
| trkH                       | trk system   | 1.07 | 0.13 | 1 | 1.36 | 0.19 | 1     | 1.2  |
| hisS                       | histidyl-tRN | 1.02 | 0.1  | 1 | 0.96 | 0.14 | 1     | 1.04 |
| rffC                       | lipopolysac  | 1.05 | 0.1  | 1 | 1.53 | 0.12 | 1     | 1.31 |
| ilvA                       | threonine c  | 0.96 | 0.15 | 1 | 1.45 | 0.12 | 1     | 1.28 |
| narJ                       | respiratory  | 0.97 | 0.09 | 1 | 0.81 | 0.37 | 1     | 0.78 |
| hyaF                       | hydrogena    | 1.01 | 0.14 | 1 | 0.74 | 0.27 | 1     | 0.78 |
| ispZ                       | putative int | 1.1  | 0.08 | 1 | 0.78 | 0.21 | 0     | 0.74 |
| nadC                       | nicotinate-r | 1.08 | 0.16 | 1 | 1.03 | 0.09 | 1     | 0.99 |
| phnV                       | probable m   | 0.98 | 0.17 | 1 | 0.96 | 0.09 | 1     | 0.81 |
| fdol                       | formate de   | 1    | 0.14 | 1 | 1.22 | 0.24 | 1     | 1.11 |
| ssaD                       | putative pa  | 1.18 | 0.15 | 1 | 0.62 | 0.09 | 1     | 0.7  |
| fimH                       | FimH prote   | 0.89 | 0.12 | 1 | 1.01 | 0.18 | 1     | 0.84 |
| yigA                       | conserved    | 0.97 | 0.08 | 1 | 1.36 | 0.12 | 1     | 1.24 |
| ilvC                       | ketol-acid r | 0.93 | 0.13 | 1 | 1.46 | 0.15 | 1     | 1.24 |
| pcnB                       | poly(A) pol  | 0.9  | 0.1  | 1 | 1.02 | 0.1  | 1     | 0.99 |
| manY                       | phosphotra   | 1.06 | 0.1  | 1 | 0.84 | 0.09 | 1     | 0.75 |
|                            | putative AT  | 1.05 | 0.11 | 1 | 0.78 | 0.13 | 1     | 0.8  |
| invA                       | possible se  | 0.92 | 0.09 | 1 | 1.05 | 0.1  | 1     | 1.12 |
| ybaJ                       | conserved    | 1    | 0.05 | 1 | 1.08 | 0.15 | 1     | 0.97 |
| hyaA2                      | uptake hyd   | 1.04 | 0.09 | 1 | 0.65 | 0.13 | 1     | 0.74 |
|                            | putative me  | 1.13 | 0.17 | 1 | 0.69 | 0.13 | 1     | 0.73 |
| dmsC                       | anaerobic c  | 1.07 | 0.16 | 1 | 0.86 | 0.11 | 1     | 0.73 |
|                            | molybdopte   | 0.99 | 0.15 | 1 | 0.9  | 0.1  | 1     | 0.94 |
|                            |              | 0.71 | 0.12 | 1 | 0.66 | 0.21 | 1     | 0.79 |
| e-N, Fe-S beta subunit     |              | 0.22 | 0.07 | 1 | 0.71 | 0.09 | 1 n/a |      |
| sifB                       | putative vir | 1.1  | 0.18 | 1 | 0.71 | 0.18 | 1     | 0.78 |
| rotaxis protein III, ribos |              | 0.11 | 0.03 | 1 | 0.72 | 0.05 | 1 n/a |      |
| hslJ                       | heat shock   | 1.09 | 0.14 | 1 | 0.72 | 0.07 | 1     | 0.81 |
|                            | conserved    | 1.02 | 0.14 | 1 | 0.67 | 0.09 | 1     | 0.7  |
|                            | putative me  | 1.03 | 0.11 | 1 | 1.04 | 0.14 | 1     | 0.8  |
| sfbB                       | ABC transp   | 1.04 | 0.12 | 1 | 1.01 | 0.12 | 1     | 0.81 |
| ppiB                       | peptidyl-pr  | 1.06 | 0.09 | 1 | 0.99 | 0.06 | 1     | 0.79 |
| entC                       | isochorism   | 1.03 | 0.08 | 1 | 1.08 | 0.11 | 1     | 0.9  |
|                            | putative ph  | 1.2  | 0.07 | 1 | 1.11 | 0.12 | 1     | 1.15 |
|                            | putative inv | 1.02 | 0.11 | 1 | 0.77 | 0.14 | 1     | 0.79 |
| nhaB                       | regulator of | 1.14 | 0.1  | 1 | 0.72 | 0.13 | 1     | 0.85 |
| ar to retron in E coli     |              | 0.84 | 0.09 | 1 | 1.05 | 0.05 | 1     | 1.16 |
|                            | possible re  | 1.12 | 0.1  | 1 | 1.09 | 0.14 | 1     | 1.1  |
| selA                       | L-seryl-tRN  | 1.04 | 0.11 | 1 | 1.32 | 0.14 | 1     | 1.24 |
|                            | hypothetica  | 1.1  | 0.15 | 1 | 1.52 | 0.21 | 1     | 1.23 |
|                            | conserved    | 0.93 | 0.1  | 1 | 1.1  | 0.19 | 1     | 1.33 |
| mutH                       | DNA mism     | 1.1  | 0.12 | 1 | 1.12 | 0.13 | 1     | 1.18 |
| ine lipoprotein            |              | 0.22 | 0.05 | 1 | 0.99 | 0.09 | 1 n/a |      |



|                |               |      |      |   |      |      |     |      |
|----------------|---------------|------|------|---|------|------|-----|------|
| uxaC           | uronate iso   | 0.99 | 0.15 | 1 | 1.04 | 0.18 | 1   | 1.28 |
| proW           | glycine bet:  | 1.02 | 0.14 | 1 | 1.14 | 1.03 | 1   | 1.01 |
|                | putative me   | 1.02 | 0.19 | 1 | 1.04 | 0.16 | 1   | 1.22 |
| panF           | sodium/par    | 0.93 | 0.12 | 1 | 1.02 | 0.16 | 1   | 1.24 |
| probable minor | tail protein  | 0.25 | 0.1  | 0 | 0.89 | 0.13 | 1   | n/a  |
| gcvT           | aminometh     | 1.06 | 0.12 | 1 | 1.08 | 0.13 | 1   | 1.14 |
| ne protein     |               | 0.95 | 0.11 | 1 | 1.2  | 0.36 | 1   | 1.22 |
|                | LysR-famil    | 0.88 | 0.1  | 1 | 1.1  | 0.14 | 1   | 1.11 |
| ylaB           | hypothetica   | 1    | 0.06 | 1 | 1.04 | 0.07 | 1   | 0.87 |
| yhjE           | hypothetica   | 1.02 | 0.1  | 1 | 1.22 | 0.13 | 1   | 1.12 |
| rotein         |               | 0.07 | 0.02 | 1 | 1.1  | 0.14 | 1   | n/a  |
| sgaU           | conserved     | 1.01 | 0.08 | 1 | 1.1  | 0.11 | 1   | 1.11 |
|                | putative inr  | 1.11 | 0.13 | 1 | 1.05 | 0.17 | 1   | 1.15 |
| creD           | inner meml    | 1.07 | 0.1  | 1 | 1.13 | 0.15 | 1   | 1.13 |
|                | putative rut  | 0.99 | 0.11 | 1 | 1.14 | 0.12 | 1   | 1.1  |
|                | putative tra  | 1.07 | 0.19 | 1 | 0.88 | 0.17 | 1   | 0.85 |
| rfbK           | phosphom      | 0.94 | 0.16 | 1 | 0.81 | 0.17 | 1   | 0.92 |
| ygaC           | conserved     | 0.99 | 0.1  | 1 | 1.06 | 0.13 | 1   | 1.14 |
| folE           | GTP cyclot    | 1.11 | 0.15 | 1 | 0.9  | 0.22 | 1   | 1.01 |
| wcaJ           | putative ex   | 1.02 | 0.17 | 1 | 0.87 | 0.1  | 1   | 0.85 |
|                | glutathione   | 1    | 0.17 | 1 | 0.85 | 0.23 | 1   | 0.86 |
| mltE           | membrane      | 1.03 | 0.17 | 1 | 0.81 | 0.17 | 1   | 0.88 |
| lyxK           | putative L->  | 1.03 | 0.11 | 1 | 1.35 | 0.15 | 1   | 1.36 |
| rotein         |               | 0.13 | 0.05 | 1 | 0.91 | 0.14 | 1   | n/a  |
| kdgR           | transcriptio  | 1.05 | 0.11 | 1 | 0.73 | 0.33 | 1   | 0.86 |
|                | putative lipi | 0.85 | 0.08 | 1 | 1.29 | 0.47 | 1   | 1.35 |
| rpsJ           | 30S ribosom   | 1.01 | 0.07 | 1 | 1.15 | 0.23 | 1   | 1.37 |
| miaA           | tRNA delta    | 1    | 0.1  | 1 | 1.25 | 0.09 | 1   | 1.17 |
| tdcG           | L-serine de   | 1.04 | 0.03 | 1 | 1.09 | 0.17 | 1   | 1.14 |
|                | probable G    | 1.04 | 0.09 | 1 | 1.13 | 0.13 | 1   | 1.15 |
| air            | aerotaxis re  | 0.96 | 0.06 | 1 | 1.19 | 0.05 | 1   | 1.11 |
| gsp            | glutathiony/  | 1.13 | 0.11 | 1 | 1.12 | 0.16 | 1   | 1.21 |
|                | possible m    | 1.01 | 0.09 | 1 | 1.01 | 0.09 | 1   | 1.16 |
| flgF           | putative fla  | 1.09 | 0.17 | 1 | 0.81 | 0.13 | 1   | 0.76 |
|                | putative me   | 1.03 | 0.13 | 1 | 1.08 | 0.14 | 1   | 1.16 |
| ttrS           |               | 1.07 | 0.15 | 1 | 0.73 | 0.08 | 1   | 0.8  |
|                |               | 0.25 | 0.07 | 1 | 1.25 | 0.17 | n/a | n/a  |
| dsbB           | disulfide isc | 1.11 | 0.15 | 1 | 1.11 | 0.13 | 1   | 1.35 |
|                | conserved     | 1.04 | 0.13 | 1 | 1.08 | 0.09 | 1   | 1.19 |
| bglA           | 6-phospho-    | 1.03 | 0.26 | 1 | 1.09 | 0.19 | 1   | 1.2  |
|                | probable se   | 0.91 | 0.14 | 1 | 0.94 | 0.2  | 1   | 0.85 |
| uxuB           | D-mannoni     | 0.97 | 0.08 | 1 | 1.1  | 0.19 | 1   | 1.23 |
|                | putative me   | 1.02 | 0.08 | 1 | 1.13 | 0.07 | 1   | 1.15 |
| hpcG           | 2-oxo-hept    | 1.09 | 0.11 | 1 | 0.94 | 0.29 | 1   | 0.76 |
|                | putative me   | 0.97 | 0.09 | 1 | 1.12 | 0.22 | 1   | 0.77 |
|                | HlyD-famil    | 1    | 0.06 | 1 | 0.95 | 0.83 | 1   | 0.84 |
| dacC           | D-alanyl-D-   | 0.96 | 0.06 | 1 | 0.92 | 0.15 | 1   | 0.83 |
| ybaZ           | putative me   | 1.05 | 0.12 | 1 | 1.03 | 0.11 | 1   | 0.91 |
| yaiE           | conserved     | 1.11 | 0.1  | 1 | 0.98 | 0.13 | 1   | 0.8  |
|                | hypothetica   | 1.03 | 0.1  | 1 | 1.17 | 0.1  | 1   | 1.29 |
|                |               | 0.54 | 0.1  | 1 | 0.9  | 0.13 | 1   | n/a  |
| sin            |               | 0.66 | 0.06 | 1 | 1.16 | 0.18 | 0   | n/a  |

|                          |               |       |       |     |      |      |     |      |
|--------------------------|---------------|-------|-------|-----|------|------|-----|------|
| yfhF                     | conserved     | 1.1   | 0.12  | 1   | 0.91 | 0.12 | 1   | 1.04 |
| dsrB                     | DsrB protei   | 1.03  | 0.13  | 1   | 0.82 | 0.16 | 1   | 0.96 |
| srB-regulated factor     |               | 0.16  | 0.03  | 1   | 0.82 | 0.13 | 1   | n/a  |
|                          | putative me   | 1.03  | 0.13  | 1   | 0.98 | 0.13 | 1   | 1.04 |
| ybil                     | hypothetica   | 1.09  | 0.12  | 1   | 0.79 | 0.13 | 1   | 0.86 |
| relE                     | conserved     | 1.15  | 0.12  | 1   | 1.06 | 0.1  | 1   | 1.11 |
| yjiW                     | conserved     | 1.01  | 0.08  | 1   | 1.01 | 0.11 | 1   | 1.21 |
|                          | conserved     | 0.97  | 0.11  | 1   | 1.08 | 0.1  | 1   | 1.03 |
|                          | conserved     | 0.98  | 0.05  | 1   | 0.74 | 0.1  | 1   | 0.82 |
|                          | putative se   | 0.81  | 0.07  | 1   | 0.88 | 0.16 | 1   | 0.73 |
| lppA                     | major outei   | 1.03  | 0.11  | 1   | 0.84 | 0.09 | 1   | 0.97 |
|                          | conserved     | 1.12  | 0.08  | 1   | 1.31 | 0.05 | 1   | 1.35 |
|                          | putative se   | 1.1   | 0.06  | 1   | 1.28 | 0.14 | 1   | 1.34 |
|                          | hypothetica   | 0.97  | 0.05  | 1   | 1.1  | 0.21 | 1   | 1.08 |
| caiC                     | probable cr   | 0.94  | 0.06  | 1   | 1.05 | 0.19 | 1   | 0.96 |
|                          | possible su   | 1.06  | 0.08  | 1   | 1.12 | 0.15 | 1   | 1.03 |
| folA                     | dihydrofola   | 1.08  | 0.08  | 1   | 1.07 | 0.06 | 1   | 0.99 |
| pdxA                     | pyridoxal p   | 1.07  | 0.14  | 1   | 1.17 | 0.16 | 1   | 1.08 |
|                          | putative lipi | 1.15  | 0.13  | 1   | 1.11 | 0.17 | 1   | 1.09 |
|                          |               | 0.17  | 0.05  | 1   | 1.17 | 0.47 | 0   | n/a  |
|                          | putative me   | 0.89  | 0.14  | 1   | 0.72 | 0.11 | 1   | 0.77 |
| pspB                     | phage shor    | 1.03  | 0.15  | 1   | 0.71 | 0.16 | 1   | 0.84 |
|                          | putative lipi | 1.05  | 0.15  | 1   | 0.68 | 0.13 | 1   | 0.72 |
| rotein                   |               | 0.19  | 0.05  | 1   | 0.68 | 0.06 | 1   | n/a  |
|                          | conserved     | 1.06  | 0.19  | 1   | 1.09 | 0.11 | 1   | 1.22 |
| ein                      |               | 0.02  | 0.01  | 1   | 0.66 | 0.1  | n/a | n/a  |
| : toxin                  |               | 0.04  | 0.01  | 1   | 0.71 | 0.06 | n/a | n/a  |
| ssembly                  |               | 0.04  | 0.02  | 1   | 0.71 | 0.05 | n/a | n/a  |
| ulence: hydrophilic prot |               | 0.04  | 0.01  | 1   | 0.68 | 0.11 | n/a | n/a  |
| rotein                   |               | 0.05  | 0.03  | 1   | 0.7  | 0.05 | n/a | n/a  |
| ssembly                  |               | 0.03  | 0.01  | 1   | 0.68 | 0.03 | n/a | n/a  |
|                          | n/a           | n/a   | n/a   | n/a | n/a  | n/a  | n/a | n/a  |
|                          | n/a           | n/a   | n/a   | n/a | n/a  | n/a  | n/a | n/a  |
|                          | n/a           | n/a   | n/a   | n/a | n/a  | n/a  | n/a | n/a  |
|                          | n/a           | n/a   | n/a   | n/a | n/a  | n/a  | n/a | n/a  |
|                          | n/a           | n/a   | n/a   | n/a | n/a  | n/a  | n/a | n/a  |
| utative outer membran    |               | 0.41  | 0.05  | 1   | 0.72 | 0.07 | n/a | 1.21 |
|                          |               | 0.18  | 0.03  | 1   | 0.84 | 0.09 | n/a | n/a  |
|                          |               | 0.29  | 0.05  | 1   | 0.97 | 0.07 | n/a | n/a  |
|                          |               | 0.17  | 0.02  | 1   | 0.8  | 0.07 | n/a | n/a  |
|                          |               | 0.69  | 0.13  | 0   | 1    | 0.3  | n/a | n/a  |
| ive tail assembly protei |               | 0.44  | 0.1   | 0   | 0.96 | 0.3  | 0   | n/a  |
| nupG                     | nucleoside    | 1.1   | 0.19  | 1   | 1.07 | 0.12 | 1   | 1.2  |
|                          | hypothetica   | 5.73  | 2.44  | 1   | n/a  | n/a  | n/a | 0.92 |
|                          | hypothetica   | 6.92  | 3.02  | 1   | n/a  | n/a  | n/a | 1.01 |
| gam                      | host-nuclea   | 8.11  | 2.66  | 1   | n/a  | n/a  | n/a | 0.76 |
|                          | putative ba   | 7.49  | 1.27  | 1   | n/a  | n/a  | n/a | 0.94 |
|                          | putative ba   | 31.65 | 17.16 | 1   | n/a  | n/a  | n/a | 0.69 |
|                          | putative ba   | 14.39 | 2.33  | 1   | n/a  | n/a  | n/a | 0.86 |
|                          | probable se   | 1.52  | 0.13  | 1   | 0.98 | 0.12 | n/a | 0.87 |
|                          | putative DN   | 5.13  | 0.91  | 1   | n/a  | n/a  | n/a | 0.82 |
|                          | putative pro  | 17.53 | 7.55  | 1   | n/a  | n/a  | n/a | 0.73 |

|                        |             |       |      |     |      |      |     |      |
|------------------------|-------------|-------|------|-----|------|------|-----|------|
|                        | putative ba | 9.9   | 1.81 | 1   | n/a  | n/a  | n/a | 0.78 |
|                        | conserved   | 25.49 | 4.57 | 1   | n/a  | n/a  | n/a | 0.71 |
|                        | hypothetica | 4.09  | 0.69 | 1   | n/a  | n/a  | n/a | 0.88 |
|                        | bacterioph  | 7.72  | 1.01 | 1   | n/a  | n/a  | n/a | 0.62 |
| pdxY                   | pyridoxami  | 1.11  | 0.16 | 1   | 0.72 | 0.08 | n/a | 0.68 |
|                        | putative ba | 23.49 | 6.67 | 1   | n/a  | n/a  | n/a | 0.75 |
|                        | putative ba | 20.23 | 7.93 | 1   | n/a  | n/a  | n/a | 0.72 |
|                        | hypothetica | 21.51 | 7.88 | 1   | n/a  | n/a  | n/a | 0.85 |
| recE                   | exodeoxyri  | 15.48 | 3.63 | 1   | n/a  | n/a  | n/a | 0.78 |
| aroD                   | 3-dehydroc  | 3.69  | 1.59 | 1   | n/a  | n/a  | n/a | 0.75 |
|                        | putative ba | 14.21 | 3.56 | 1   | n/a  | n/a  | n/a | 0.74 |
|                        | putative ba | 11.56 | 2.3  | 1   | n/a  | n/a  | n/a | 0.82 |
|                        | putative ba | 16.19 | 1.59 | 1   | n/a  | n/a  | n/a | 0.83 |
| cl                     | repressor p | 11.11 | 3.23 | 1   | n/a  | n/a  | n/a | 1.43 |
|                        | putative ca | 0.94  | 0.27 | 0   | n/a  | n/a  | n/a | 0.62 |
| vexB                   | Vi polysacc | 18.33 | 3.31 | 1   | n/a  | n/a  | n/a | 1.15 |
|                        | putative me | 24.16 | 5.69 | 1   | n/a  | n/a  | n/a | 1.03 |
|                        | hypothetica | 16.81 | 3.43 | 1   | n/a  | n/a  | n/a | 1.09 |
|                        | helicase re | 13.7  | 1.53 | 1   | n/a  | n/a  | n/a | 1.1  |
|                        |             | 1.68  | 0.1  | 1   | 1.26 | 0.14 | n/a | 1.25 |
|                        | hypothetica | 18.66 | 2.59 | 1   | n/a  | n/a  | n/a | 1.08 |
|                        | n/a         | n/a   | n/a  | n/a | n/a  | n/a  | n/a | n/a  |
|                        | n/a         | n/a   | n/a  | n/a | n/a  | n/a  | n/a | n/a  |
|                        | n/a         | n/a   | n/a  | n/a | n/a  | n/a  | n/a | n/a  |
|                        | n/a         | n/a   | n/a  | n/a | n/a  | n/a  | n/a | n/a  |
|                        | n/a         | n/a   | n/a  | n/a | n/a  | n/a  | n/a | n/a  |
|                        | n/a         | n/a   | n/a  | n/a | n/a  | n/a  | n/a | n/a  |
| pepT                   | aminotripe  | 1.08  | 0.14 | 1   | 0.75 | 0.12 | 1   | 0.77 |
| murD                   | UDP-N-ace   | 1.02  | 0.1  | 1   | 1.19 | 0.23 | 1   | 0.95 |
| lonuclease             |             | 0.37  | 0.12 | 1   | 1.02 | 0.2  | 1   | n/a  |
| panB                   | 3-methyl-2- | 0.66  | 0.15 | 1   | 1    | 0.1  | 1   | 1.03 |
|                        | putative se | 0.96  | 0.11 | 1   | 1.13 | 0.13 | 1   | 0.97 |
|                        | conserved   | 0.96  | 0.12 | 0   | 1.27 | 0.4  | 0   | 0.75 |
| fhuB                   | ferrichrome | 0.92  | 0.08 | 1   | 1.1  | 0.14 | 1   | 0.98 |
|                        |             | 0.3   | 0.07 | 1   | 1.01 | 0.14 | 1   | 0.78 |
| ybfF                   | putative es | 1     | 0.07 | 1   | 0.95 | 0.09 | 1   | 0.87 |
| nate transport protein |             | 0.13  | 0.02 | 1   | 1.17 | 0.23 | 1   | n/a  |
| riptide (RNA-depende   |             | 0.23  | 0.02 | 1   | 1.47 | 0.38 | 0   | n/a  |
| yieN                   | conserved   | 0.97  | 0.07 | 1   | 1.41 | 0.23 | 1   | 1.33 |
| ne protein             |             | 1.02  | 0.09 | 1   | 1.44 | 0.18 | 1   | n/a  |
|                        | conserved   | 0.94  | 0.08 | 1   | 1.49 | 0.38 | 1   | 1.33 |
|                        | putative re | 0.97  | 0.08 | 1   | 1.05 | 0.18 | 1   | 1.22 |
| pgtP                   | phosphogly  | 0.92  | 0.09 | 1   | 0.87 | 0.17 | 1   | 0.94 |
| galT                   | galactose-  | 0.96  | 0.05 | 1   | 0.86 | 0.13 | 1   | 0.89 |
| mutT                   | 7,8-dihydro | 1.06  | 0.1  | 1   | 1.08 | 0.17 | 1   | 0.97 |
|                        |             | 1.03  | 0.11 | 1   | 1.14 | 0.18 | n/a | n/a  |
|                        | putative me | 1.13  | 0.23 | 1   | 1    | 0.23 | 1   | 0.78 |
| yrdC                   | conserved   | 1.01  | 0.09 | 1   | 1.08 | 0.15 | 1   | 1.26 |
| yheR                   | putative ox | 1.07  | 0.07 | 1   | 1.08 | 0.06 | 1   | 1.34 |
| yrfG                   | putative hy | 1.09  | 0.13 | 1   | 1.27 | 0.1  | 1   | 1.42 |
|                        | hypothetica | 0.95  | 0.14 | 1   | 0.89 | 0.23 | 1   | 0.87 |
| yheM                   | conserved   | 0.72  | 0.1  | 1   | 1.38 | 0.19 | 0   | 1.44 |

|      |                           |      |      |   |      |      |     |      |
|------|---------------------------|------|------|---|------|------|-----|------|
| aroK | shikimate k               | 1.13 | 0.23 | 1 | 1.15 | 0.33 | 1   | 1.24 |
|      | conserved                 | 1.02 | 0.08 | 1 | 0.87 | 0.67 | 1   | 0.82 |
|      | conserved                 | 1.03 | 0.07 | 1 | 1.01 | 0.62 | 0   | 0.77 |
| manB | phosphom                  | 0.94 | 0.05 | 1 | 0.88 | 0.13 | 1   | 0.89 |
|      | hypothetica               | 1    | 0.02 | 1 | 0.85 | 0.15 | 1   | 0.99 |
| glgX | glycogen o                | 0.93 | 0.06 | 1 | 1.19 | 0.13 | 1   | 1.39 |
|      | putative m                | 0.95 | 0.07 | 1 | 1.47 | 0.33 | 0   | 1.25 |
|      | hypothetica               | 0.91 | 0.04 | 1 | 0.82 | 0.09 | 1   | 0.95 |
|      | thetical protein          | 0.25 | 0.06 | 1 | 1.03 | 0.31 | 1   | n/a  |
|      | hypothetica               | 0.85 | 0.07 | 1 | 1.04 | 0.21 | 0   | 0.73 |
|      |                           | 0.09 | 0.01 | 1 | 0.89 | 0.07 | 1   | n/a  |
| alkA | DNA-3-mei                 | 1    | 0.25 | 1 | 0.96 | 0.14 | 1   | 0.72 |
|      |                           | 1.01 | 0.17 | 1 | 1.17 | 0.13 | n/a | 1.1  |
|      | regulator                 | 0.15 | 0.04 | 1 | 1.12 | 0.26 | 1   | n/a  |
|      | late isomerase (dehydr    | 0.1  | 0.03 | 1 | 1.14 | 0.19 | 1   | n/a  |
| pqiB | putative se               | 1.03 | 0.16 | 1 | 0.89 | 0.12 | 1   | 0.76 |
| rstA | putative tw               | 1.05 | 0.12 | 1 | 0.77 | 0.21 | 1   | 0.85 |
|      | possible tra              | 1.14 | 0.16 | 1 | 0.82 | 0.1  | 1   | 0.77 |
|      |                           | 0.2  | 0.06 | 1 | 1.02 | 0.21 | 0   | n/a  |
|      |                           | 0.07 | 0.01 | 1 | 0.87 | 0.07 | n/a | n/a  |
| yfhA | putative an               | 0.91 | 0.06 | 1 | 0.92 | 0.23 | 1   | 1    |
|      | putative tra              | 1.02 | 0.04 | 1 | 1.06 | 0.12 | 1   | 0.99 |
|      |                           | 0.05 | 0.01 | 1 | 0.7  | 0.13 | 1   | n/a  |
| pflA | pyruvate fo               | 1.04 | 0.07 | 1 | 0.91 | 0.2  | 1   | 0.91 |
| ycbB | putative ex               | 0.97 | 0.06 | 1 | 0.86 | 0.09 | 1   | 0.77 |
| yiiP | putative tra              | 1.02 | 0.06 | 1 | 1.16 | 0.23 | 1   | 1.26 |
|      | putative ex               | 0.9  | 0.06 | 1 | 1.25 | 0.17 | 1   | 1.17 |
|      | hypothetica               | 0.87 | 0.06 | 1 | 1.08 | 0.23 | 1   | 1.2  |
| frdB | fumarate re               | 0.91 | 0.12 | 1 | 1.18 | 0.24 | 1   | 1.2  |
|      | live tail assembly protei | 0.11 | 0.01 | 1 | 0.86 | 0.16 | 1   | n/a  |
| focA | probable fc               | 1.04 | 0.12 | 1 | 0.89 | 0.16 | 1   | 0.78 |
| int  | integrase                 | 0.98 | 0.13 | 1 | 0.81 | 0.18 | 1   | 0.85 |
| metH | B12-depen                 | 0.95 | 0.12 | 1 | 1.19 | 0.21 | 1   | 1.18 |
|      | ne protein                | 0.26 | 0.05 | 1 | 1.22 | 0.16 | 1   | n/a  |
|      | putative lipi             | 0.87 | 0.12 | 1 | 1.34 | 0.14 | 1   | 1.17 |
|      | arginine de               | 1.01 | 0.08 | 1 | 1.18 | 0.13 | 1   | 1.22 |
|      | putative ph               | 1.16 | 0.1  | 1 | 0.87 | 0.14 | 1   | 0.91 |
|      | putative tra              | 0.98 | 0.06 | 1 | 1.03 | 0.17 | 1   | 0.96 |
|      | conserved                 | 0.92 | 0.06 | 1 | 0.72 | 0.16 | 1   | 0.71 |
|      | regulator, LysR family    | 0.07 | 0.02 | 1 | 1.03 | 0.17 | 1   | n/a  |
| grxB | glutaredoxi               | 1.03 | 0.02 | 1 | 0.9  | 0.26 | 1   | 0.82 |
| thiH | thiamine bi               | 0.82 | 0.07 | 1 | 1.26 | 0.1  | 1   | 1.37 |
|      | putative so               | 0.99 | 0.05 | 1 | 0.75 | 0.07 | 1   | 0.81 |
| yjeF | conserved                 | 0.85 | 0.05 | 1 | 1.24 | 0.09 | 1   | 1.16 |
|      |                           | 0.2  | 0.04 | 1 | 0.76 | 0.05 | 1   | n/a  |
| napF | ferredoxin-               | 0.89 | 0.04 | 1 | 0.91 | 0.16 | 1   | 0.8  |
|      | putative MF               | 1.09 | 0.11 | 1 | 0.92 | 0.08 | 1   | 0.9  |
|      | rotein                    | 0.1  | 0    | 1 | 0.68 | 0.09 | 1   | n/a  |
| yojI | putative AE               | 1.11 | 0.19 | 1 | 0.89 | 0.15 | 1   | 0.87 |
|      | conserved                 | 1.08 | 0.11 | 1 | 1.15 | 0.26 | 1   | 0.73 |
|      | putative an               | 1.11 | 0.13 | 1 | 0.93 | 0.15 | 1   | 1.01 |
| usg  | putative se               | 1.04 | 0.06 | 1 | 1.02 | 0.19 | 1   | 0.8  |

|       |                                             |      |      |   |      |      |       |      |
|-------|---------------------------------------------|------|------|---|------|------|-------|------|
| celB  | PTS system                                  | 1.05 | 0.18 | 1 | 0.73 | 0.16 | 1     | 0.83 |
| ssaV  | putative tyrosine phosphatase               | 0.96 | 0.09 | 1 | 0.73 | 0.12 | 1     | 0.79 |
| asnC  | regulatory protein                          | 1.05 | 0.12 | 1 | 1.37 | 0.21 | 1     | 1.46 |
| safD  | putative firmenone synthase                 | 1.04 | 0.08 | 1 | 1.1  | 0.11 | 1     | 0.91 |
| rnhB  | ribonuclease                                | 1.02 | 0.07 | 1 | 1.13 | 0.15 | 1     | 0.89 |
| ubiA  | 4-hydroxyubiquinol synthase                 | 0.94 | 0.08 | 1 | 1.18 | 0.25 | 1     | 1.07 |
|       | putative fatty acid synthase                | 0.94 | 0.06 | 1 | 0.93 | 0.07 | 1     | 0.98 |
| ftsQ  | cell division protein                       | 1.02 | 0.05 | 1 | 1.19 | 0.18 | 1     | 0.97 |
| astA  | arginine N-ferrous flavoprotein             | 0.85 | 0.05 | 1 | 1.03 | 0.19 | 1     | 0.87 |
|       | conserved                                   | 0.09 | 0.01 | 1 | 0.75 | 0.11 | 1 n/a |      |
|       | conserved                                   | 0.91 | 0.1  | 1 | 1.31 | 1.98 | 0     | 0.7  |
| smvA  | methyl violarone synthase                   | 0.85 | 0.03 | 1 | 0.74 | 0.3  | 1     | 0.73 |
| ssaP  | putative tyrosine phosphatase               | 0.94 | 0.04 | 1 | 0.96 | 0.32 | 1     | 0.79 |
| proY  | proline-specific aminotransferase           | 1.08 | 0.2  | 1 | 0.97 | 0.1  | 1     | 0.82 |
| napC  | cytochrome c                                | 1.11 | 0.09 | 1 | 1    | 0.22 | 1     | 0.95 |
| yfhH  | putative transaminase                       | 0.98 | 0.1  | 1 | 0.99 | 0.11 | 1     | 1.05 |
|       | conserved                                   | 1.04 | 0.16 | 1 | 0.84 | 0.07 | 1     | 0.86 |
| yabl  | DedA family protein                         | 1.17 | 0.12 | 1 | 1.07 | 0.14 | 1     | 0.9  |
| ppdD  | prepilin peptidase                          | 0.98 | 0.1  | 1 | 0.98 | 0.27 | 1     | 1.1  |
| gyrA  | DNA gyrase                                  | 0.94 | 0.09 | 1 | 0.95 | 0.11 | 1     | 0.97 |
| cysP  | thiosulphate reductase                      | 0.96 | 0.06 | 1 | 1    | 0.11 | 1     | 0.96 |
| glnP  | glutamine tRNA synthetase                   | 1.1  | 0.05 | 1 | 0.81 | 0.08 | 1     | 0.87 |
| erfK  | putative export protein                     | 1.06 | 0.05 | 1 | 0.81 | 0.11 | 1     | 0.79 |
| fepD  | ferric enterobactin receptor                | 0.97 | 0.06 | 1 | 1.13 | 0.21 | 1     | 0.86 |
|       | similar to minor tail protein               | 0.09 | 0.01 | 1 | 1.12 | 0.22 | 1 n/a |      |
|       |                                             | 0.26 | 0.1  | 1 | 1.12 | 0.47 | 0 n/a |      |
|       | putative glycerol-3-phosphate dehydrogenase | 0.88 | 0.08 | 1 | 1.39 | 0.13 | 1     | 1.38 |
| dppA  | periplasmic diacylglycerol phosphatase      | 0.93 | 0.09 | 1 | 1.19 | 0.13 | 1     | 1.28 |
| ugpB  | glycerol-3-phosphate dehydrogenase          | 1.01 | 0.03 | 1 | 1.23 | 0.12 | 1     | 1.29 |
| acT   | hypothetical protein                        | 0.97 | 0.05 | 1 | 0.81 | 0.03 | 1     | 0.77 |
|       | putative GTPase                             | 1    | 0.06 | 1 | 0.87 | 0.21 | 1     | 1    |
| acrR  | potential acyltransferase                   | 1.08 | 0.19 | 1 | 1.07 | 0.24 | 1     | 0.95 |
|       | hypothetical protein                        | 1.12 | 0.14 | 1 | 0.97 | 0.2  | 1     | 0.95 |
| ytfE  | conserved                                   | 1.22 | 0.12 | 1 | 1.19 | 0.07 | 1     | 1.17 |
| trpS2 | probable tryptophan synthase                | 1.03 | 0.1  | 1 | 1.23 | 0.17 | 1     | 1.27 |
|       | conserved                                   | 1.06 | 0.09 | 1 | 1.18 | 0.07 | 1     | 1.18 |
| yiaB  | putative membrane protein                   | 1.11 | 0.15 | 1 | 1.27 | 0.25 | 1     | 1.13 |
|       | possible LytR family protein                | 1.03 | 0.1  | 1 | 1.13 | 0.23 | 1     | 1.18 |
| rpe   | ribulose-phosphate carboxylase              | 1.01 | 0.03 | 1 | 1.18 | 0.17 | 1     | 1.25 |
| gyrB  | DNA gyrase                                  | 0.93 | 0.1  | 1 | 1.46 | 0.35 | 1     | 1.47 |
| hisF  | cyclase HisG                                | 1.06 | 0.07 | 1 | 0.91 | 0.18 | 1     | 0.91 |
| tsx   | nucleoside diphosphate kinase               | 0.87 | 0.06 | 1 | 1.17 | 0.32 | 1     | 0.95 |
| pyrF  | orotidine-5-phosphate decarboxylase         | 0.98 | 0.04 | 1 | 0.79 | 0.11 | 1     | 0.79 |
| sun   | sun protein                                 | 0.93 | 0.05 | 1 | 1.17 | 0.09 | 1     | 1.32 |
| aroB  | 3-dehydroquinate synthase                   | 1    | 0.06 | 1 | 1.18 | 0.1  | 1     | 1.21 |
| fliD  | flagellar hook protein                      | 0.91 | 0.05 | 1 | 0.99 | 0.3  | 1     | 0.91 |
| rnc   | ribonuclease                                | 0.94 | 0.07 | 1 | 1.04 | 0.13 | 1     | 1.18 |
| eutE  | putative alcohol dehydrogenase              | 0.93 | 0.06 | 1 | 1.1  | 0.17 | 1     | 0.93 |
| mobB  | molybdopterin biosynthesis protein          | 0.94 | 0.07 | 1 | 1.29 | 0.25 | 1     | 1.23 |
| spaM  | secretory protein                           | 1.13 | 0.15 | 1 | 1.08 | 0.1  | 1     | 1.07 |
| msgA  | putative virulence factor                   | 1.22 | 0.11 | 1 | 1.05 | 0.85 | 0     | 0.85 |
| sipB  | pathogenicity island protein                | 1    | 0.17 | 1 | 1.06 | 0.18 | 1     | 1.06 |

|      |               |      |      |   |      |          |   |      |
|------|---------------|------|------|---|------|----------|---|------|
|      | putative me   | 1    | 0.1  | 1 | 0.85 | 0.1      | 1 | 0.86 |
| ybiK | putative L-ε  | 1.04 | 0.07 | 1 | 0.92 | 0.13     | 1 | 0.78 |
| yhfC | putative me   | 1.03 | 0.12 | 1 | 1.03 | 0.16     | 1 | 1.19 |
| pduL | conserved     | 1.02 | 0.12 | 1 | 0.81 | 0.07     | 1 | 0.8  |
| phnB | conserved     | 0.98 | 0.08 | 1 | 1.22 | 0.13     | 1 | 1.16 |
| yebC | conserved     | 0.94 | 0.09 | 1 | 0.69 | 0.06     | 1 | 0.82 |
| yhcQ | possible ex   | 0.96 | 0.05 | 1 | 1.33 | 0.28     | 1 | 1.28 |
| rpsT | 30S riboso    | 1.02 | 0.08 | 1 | 1.33 | 0.27     | 0 | 1.07 |
|      | conserved     | 1    | 0.08 | 1 | 0.96 | 0.1      | 1 | 0.87 |
|      | hypothetica   | 0.9  | 0.09 | 1 | 0.86 | 0.38     | 0 | 0.74 |
| yihR | conserved     | 0.88 | 0.04 | 1 | 1.28 | 0.14     | 1 | 1.42 |
| slrP |               | 0.83 | 0.05 | 1 | 1.05 | 0.19     | 1 | 0.88 |
| pduO | conserved     | 0.94 | 0.05 | 1 | 0.85 | 0.14     | 1 | 0.85 |
| melA | alpha-galac   | 0.93 | 0.07 | 1 | 1.11 | 0.19     | 1 | 1.21 |
|      | conserved     | 1.06 | 0.1  | 1 | 0.77 | 0.09     | 1 | 0.89 |
| yeeC |               | 1.12 | 0.13 | 1 | 0.8  | 0.1      | 1 | 0.97 |
|      | putative typ  | 0.92 | 0.17 | 1 | 1.17 | 0.07     | 1 | 1.3  |
|      | conserved     | 1.11 | 0.14 | 1 | 0.95 | 0.26     | 0 | 1.07 |
| ribF | riboflavin b  | 1.11 | 0.15 | 1 | 1.04 | 0.13     | 1 | 0.98 |
| nrdG | anaerobic r   | 0.91 | 0.1  | 1 | 1.21 | 0.26     | 1 | 1.2  |
|      | putative ex   | 0.92 | 0.13 | 1 | 0.69 | 0.13 n/a |   | 0.83 |
| rfe  | putative un   | 1.07 | 0.11 | 1 | 1.32 | 0.21     | 1 | 1.33 |
| pldB | lysophosph    | 1    | 0.1  | 1 | 1.44 | 0.28     | 1 | 1.2  |
| ygdE | conserved     | 0.89 | 0.1  | 1 | 1.02 | 0.16     | 1 | 1.14 |
| rplK | 50S riboso    | 0.93 | 0.04 | 1 | 1.25 | 0.23     | 1 | 1.55 |
| flgH | flagellar L-r | 0.97 | 0.07 | 1 | 0.76 | 0.16     | 1 | 0.76 |
| nirC | putative nit  | 0.9  | 0.07 | 1 | 1.11 | 0.09     | 1 | 1.13 |
| argR | arginine rej  | 0.89 | 0.04 | 1 | 1.09 | 0.11     | 1 | 1.34 |
|      | conserved     | 0.96 | 0.05 | 1 | 1.19 | 0.2      | 1 | 1.19 |
| hsIV | heat shock    | 0.93 | 0.09 | 1 | 1.33 | 0.36     | 1 | 1.39 |
| fadB | large (alph   | 0.94 | 0.03 | 1 | 1.19 | 0.23     | 1 | 1.33 |
|      | putative req  | 0.79 | 0.05 | 1 | 1.27 | 0.35     | 1 | 1.35 |
| yigB | conserved     | 0.95 | 0.06 | 1 | 1.39 | 0.23     | 1 | 1.16 |
| cyaA | adenylate c   | 0.94 | 0.12 | 1 | 1.24 | 0.26     | 1 | 1.16 |
|      | putative tra  | 1.04 | 0.22 | 1 | 0.76 | 0.11     | 1 | 0.77 |
| rpoC | DNA-direct    | 0.96 | 0.1  | 1 | 1.28 | 0.15     | 1 | 1.43 |
| fabI | enoyl-[acyl-  | 1.03 | 0.14 | 1 | 0.92 | 0.2      | 1 | 0.79 |
| cheR | chemotaxis    | 0.96 | 0.13 | 1 | 0.87 | 0.12     | 1 | 0.86 |
| yqcB | putative RM   | 0.96 | 0.04 | 1 | 1.1  | 0.29     | 1 | 1.18 |
|      | probable su   | 1.09 | 0.13 | 1 | 0.82 | 0.11     | 1 | 0.79 |
| gcl  | glyoxylate c  | 0.92 | 0.05 | 1 | 0.93 | 0.15     | 1 | 0.9  |
| ycbL | conserved     | 1    | 0.09 | 1 | 0.99 | 0.17     | 1 | 0.77 |
| narW | respiratory   | 1.07 | 0.08 | 1 | 0.7  | 0.09     | 1 | 0.71 |
| stbE | fimbrial cha  | 0.91 | 0.07 | 1 | 1.05 | 0.15     | 1 | 0.94 |
| yciC | putative me   | 0.96 | 0.02 | 1 | 0.89 | 0.32     | 1 | 0.75 |
| pth  | peptidyl-tR   | 0.95 | 0.04 | 1 | 0.79 | 0.09     | 1 | 0.89 |
| fadD | long-chain-   | 1.01 | 0.03 | 1 | 0.69 | 0.17     | 1 | 0.78 |
|      | putative me   | 0.92 | 0.06 | 1 | 0.76 | 0.24     | 1 | 0.81 |
|      | conserved     | 0.89 | 0.04 | 1 | 0.87 | 0.11     | 1 | 0.97 |
|      | integral me   | 0.95 | 0.03 | 1 | 0.93 | 0.1      | 1 | 0.89 |
|      | molybdopte    | 0.97 | 0.06 | 1 | 1.03 | 0.15     | 1 | 0.89 |
| dpiB | sensor kin    | 1.02 | 0.21 | 1 | 0.92 | 0.1      | 1 | 0.84 |

|           |                 |      |      |   |      |      |   |      |
|-----------|-----------------|------|------|---|------|------|---|------|
| msbA      | probable tr     | 1.11 | 0.16 | 1 | 0.79 | 0.23 | 1 | 0.75 |
|           | conserved       | 0.81 | 0.15 | 1 | 0.95 | 0.13 | 1 | 0.88 |
| tehB      | tellurite res   | 1.06 | 0.11 | 1 | 0.8  | 0.18 | 1 | 0.76 |
| protein;  | predicted bacte | 0.27 | 0.07 | 1 | 0.65 | 0.07 | 1 | n/a  |
|           | putative DN     | 1.09 | 0.17 | 1 | 0.79 | 0.1  | 1 | 0.81 |
| yhjK      | conserved       | 0.99 | 0.11 | 1 | 1.23 | 0.19 | 1 | 1.2  |
| rotein    |                 | 1.04 | 0.13 | 1 | 1.18 | 0.12 | 1 | n/a  |
|           |                 | 1.03 | 0.11 | 1 | 1.42 | 0.14 | 1 | 1.26 |
| hycE      | formate hy      | 0.95 | 0.14 | 1 | 1.08 | 0.16 | 1 | 1.1  |
| fucP      | L-fucose pe     | 0.94 | 0.04 | 1 | 1.12 | 0.09 | 1 | 1.08 |
|           | putative ty     | 0.96 | 0.06 | 1 | 1.08 | 0.16 | 1 | 1.13 |
| yajI      | putative lip    | 0.96 | 0.05 | 1 | 0.98 | 0.18 | 1 | 0.92 |
| lon       | Lon protea      | 0.91 | 0.05 | 1 | 1.07 | 0.16 | 1 | 0.89 |
| nikR      | nickel resp     | 0.98 | 0.08 | 1 | 1.23 | 0.21 | 1 | 1.29 |
| sociated, | metal-depend    | 0.86 | 0.06 | 1 | 1.23 | 0.2  | 1 | 1.31 |
|           | putative tra    | 0.99 | 0.09 | 1 | 1.31 | 0.31 | 1 | 1.31 |
|           | conserved       | 0.83 | 0.06 | 1 | 1.44 | 0.27 | 1 | 1.37 |
| yafD      | conserved       | 0.93 | 0.17 | 1 | 1.03 | 0.05 | 1 | 0.92 |
| tgt       | queueine tR     | 1.06 | 0.15 | 1 | 1.02 | 0.15 | 1 | 0.91 |
| hybF      | hydrogena       | 0.95 | 0.14 | 0 | 1.28 | 0.18 | 0 | 0.82 |
| emrB      | multidrug r     | 0.91 | 0.11 | 1 | 1    | 0.08 | 1 | 1.07 |
| yhjV      | putative an     | 1.09 | 0.1  | 1 | 1.17 | 0.14 | 1 | 1.28 |
|           | putative su     | 0.92 | 0.15 | 1 | 1.26 | 0.3  | 1 | 1.16 |
| greA      | transcriptio    | 0.93 | 0.15 | 1 | 1.14 | 0.13 | 1 | 1.37 |
|           | conserved       | 1.03 | 0.06 | 1 | 1.11 | 0.15 | 1 | 1.23 |
| exuT      | hexuronate      | 1.1  | 0.12 | 1 | 1.15 | 0.27 | 1 | 1.22 |
| alaS      | alanyl-tRN      | 0.96 | 0.07 | 1 | 1.05 | 0.11 | 1 | 1.06 |
| mgIB      | D-galactos      | 1.03 | 0.12 | 1 | 0.84 | 0.11 | 1 | 0.87 |
|           | putative me     | 1.02 | 0.05 | 1 | 0.94 | 0.12 | 1 | 0.93 |
| ygaA      | putative sig    | 0.98 | 0.05 | 1 | 1.03 | 0.12 | 1 | 1.06 |
| yejB      | putative bir    | 0.96 | 0.04 | 1 | 0.87 | 0.19 | 1 | 0.88 |
|           |                 | 0.14 | 0.03 | 1 | 0.97 | 0.2  | 1 | n/a  |
| yehW      | putative pe     | 0.98 | 0.04 | 1 | 1.01 | 0.11 | 1 | 0.8  |
| ybjU      | L-allo-threc    | 0.82 | 0.04 | 1 | 0.94 | 0.18 | 1 | 0.81 |
| rpIN      | 50S riboso      | 1    | 0.09 | 1 | 1.07 | 0.18 | 1 | 1.21 |
| stcD      | putative ex     | 1.12 | 0.17 | 1 | 0.82 | 0.08 | 1 | 0.85 |
|           | putative ge     | 1.1  | 0.13 | 1 | 0.78 | 0.1  | 1 | 0.8  |
| prlA      | preprotein      | 1.09 | 0.11 | 1 | 1.16 | 0.18 | 1 | 1.31 |
| pitA      | putative lov    | 1.15 | 0.1  | 1 | 1.15 | 0.23 | 1 | 1.35 |
|           | putative Gr     | 1.01 | 0.07 | 1 | 1.13 | 0.19 | 1 | 1.32 |
| mrr       | mrr restrict    | 1.05 | 0.08 | 1 | 1.18 | 0.24 | 1 | 1.14 |
| ytfN      | putative ex     | 1.02 | 0.06 | 1 | 1.08 | 0.15 | 1 | 1.17 |
| holD      | DNA polym       | 1.09 | 0.13 | 1 | 1.15 | 0.12 | 1 | 1.18 |
| blc       | putative lip    | 1.03 | 0.09 | 1 | 1.27 | 0.11 | 1 | 1.2  |
| yjgF      | conserved       | 0.95 | 0.05 | 1 | 1.18 | 0.09 | 1 | 1.18 |
| gatY      | tagatose-bi     | 1.04 | 0.06 | 1 | 1.12 | 0.18 | 1 | 1.27 |
|           | haemolysir      | 0.98 | 0.09 | 1 | 0.97 | 0.12 | 1 | 1.01 |
| ptsN      | nitrogen re     | 0.97 | 0.09 | 1 | 1.18 | 0.1  | 1 | 1.46 |
|           | putative me     | 1.08 | 0.07 | 1 | 1.17 | 0.16 | 1 | 1.16 |
| dksA      | dosage-dej      | 1.03 | 0.06 | 1 | 0.89 | 0.19 | 1 | 0.95 |
| sscB      | putative pa     | 1.04 | 0.1  | 1 | 0.77 | 0.25 | 1 | 1.04 |
| xerD      | site-specifi    | 1.01 | 0.03 | 1 | 1.09 | 0.03 | 1 | 1.05 |

|            |               |      |      |     |      |      |     |     |      |
|------------|---------------|------|------|-----|------|------|-----|-----|------|
| roetin     |               | 0.25 | 0.07 | 1   | 0.9  | 0.1  | 1   | n/a |      |
| sseB       | putative pa   | 1.19 | 0.16 | 1   | 0.65 | 0.12 | 1   |     | 0.71 |
| sigE       | cell invasio  | 1.21 | 0.19 | 1   | 0.84 | 0.22 | 1   |     | 0.74 |
|            |               | 0.96 | 0.09 | 1   | 0.92 | 0.21 | 1   |     | 0.93 |
| hutG       | formiminog    | 1.04 | 0.09 | 1   | 0.95 | 0.08 | 1   |     | 0.69 |
| ybiF       | putative me   | 1.08 | 0.13 | 1   | 0.86 | 0.1  | 1   |     | 0.79 |
|            | putative me   | 1.12 | 0.12 | 1   | 1.05 | 0.09 | 1   |     | 1.12 |
|            | hypothetica   | 1.08 | 0.13 | 1   | 1.14 | 0.19 | 1   |     | 1.22 |
| yajC       | putative me   | 1.03 | 0.08 | 1   | 1.04 | 0.14 | 1   |     | 0.93 |
| hha        | haemolysir    | 0.92 | 0.13 | 1   | 1.13 | 0.17 | 1   |     | 0.98 |
| exbB       | biopolymer    | 0.98 | 0.11 | 1   | 1.21 | 0.1  | 1   |     | 1.12 |
|            | possible lip  | 1.04 | 0.11 | 1   | 1.1  | 0.18 | 1   |     | 1.11 |
| cspB       | cold shock    | 0.96 | 0.11 | 1   | 0.91 | 0.12 | 1   |     | 0.99 |
| fdhF       | formate de    | 0.86 | 0.04 | 1   | 1.26 | 0.12 | 1   |     | 1.37 |
|            | conserved     | 0.99 | 0.06 | 1   | 1.2  | 0.19 | 1   |     | 1.18 |
| yjel       | putative me   | 0.96 | 0.04 | 1   | 1.11 | 0.15 | 1   |     | 1.18 |
|            | conserved     | 1.05 | 0.08 | 1   | 0.8  | 0.16 | 1   |     | 0.83 |
| ne protein |               | 0.46 | 0.12 | 1   | 1.28 | 0.21 | 1   | n/a |      |
|            | putative lipi | 0.95 | 0.06 | 1   | 0.87 | 0.14 | 1   |     | 0.91 |
| ccmC1      | heme expo     | 1.07 | 0.15 | 1   | 1.17 | 0.21 | n/a |     | 1.02 |
|            | hypothetica   | 1.01 | 0.18 | 1   | 1.02 | 0.2  | 1   |     | 1.1  |
|            | putative ph   | 1.09 | 0.08 | 1   | 0.66 | 0.16 | 1   |     | 0.54 |
|            | conserved     | 0.89 | 0.11 | 1   | 0.68 | 0.11 | 1   |     | 0.81 |
|            | conserved     | 1.28 | 0.18 | 1   | 0.66 | 0.03 | 1   |     | 0.86 |
| holE       | DNA polym     | 1.02 | 0.12 | 1   | 0.8  | 0.1  | 1   |     | 0.96 |
| hofB       | protein trar  | 0.96 | 0.09 | 1   | 1.06 | 0.23 | 1   |     | 0.93 |
|            | probable pi   | 1.01 | 0.07 | 1   | 1.32 | 0.15 | 1   |     | 1.26 |
|            | conserved     | 0.97 | 0.12 | 1   | 1.47 | 0.1  | 1   |     | 1.2  |
| ribH       | 6,7-dimethy   | 0.97 | 0.06 | 1   | 1.04 | 0.08 | 1   |     | 0.95 |
|            | conserved     | 0.93 | 0.16 | 0   | 1.36 | 0.22 | 0   |     | 1.11 |
| roetin     |               | 0.97 | 0.13 | 1   | 1.31 | 0.48 | 0   | n/a |      |
|            | putative lipi | 1.04 | 0.06 | 1   | 0.84 | 0.3  | 1   |     | 0.81 |
| pspD       | phage sho     | 1.02 | 0.14 | 1   | 0.87 | 0.09 | 1   |     | 0.78 |
| roetin     |               | 0.9  | 0.08 | 0   | 1.31 | 0.38 | 0   | n/a |      |
|            | putative me   | 1.07 | 0.06 | 1   | 0.92 | 0.44 | 0   |     | 0.71 |
|            |               | 0.27 | 0.03 | 1   | 1.12 | 0.49 | 0   | n/a |      |
|            | putative me   | 0.98 | 0.16 | 1   | 1.32 | 0.3  | 0   |     | 0.84 |
| 1          |               | 0.06 | 0.01 | 1   | 0.65 | 0.11 | n/a |     | n/a  |
| roetin     |               | 0.06 | 0.02 | 1   | 0.65 | 0.06 | n/a |     | n/a  |
|            |               | 0.04 | 0.05 | 1   | 0.68 | 0.12 | n/a |     | n/a  |
|            |               | 0.05 | 0.01 | 1   | 0.68 | 0.04 | n/a |     | n/a  |
| eshifts    |               | 0.05 | 0.02 | 1   | 0.64 | 0.07 | n/a |     | n/a  |
| ame stops  |               | 0.07 | 0.02 | 1   | 0.7  | 0.07 | n/a |     | n/a  |
|            |               | n/a  | n/a  | n/a | n/a  | n/a  | n/a |     | n/a  |
|            |               | n/a  | n/a  | n/a | n/a  | n/a  | n/a |     | n/a  |
|            |               | n/a  | n/a  | n/a | n/a  | n/a  | n/a |     | n/a  |
|            |               | n/a  | n/a  | n/a | n/a  | n/a  | n/a |     | n/a  |
|            |               | n/a  | n/a  | n/a | n/a  | n/a  | n/a |     | n/a  |
|            |               | 1    | 0.06 | 1   | 0.79 | 0.12 | n/a |     | 1.02 |
|            | putative ba   | 0.71 | 0.07 | 1   | 0.82 | 0.08 | 1   |     | 0.75 |
|            |               | 0.08 | 0.02 | 1   | 0.89 | 0.06 | 1   | n/a |      |
| ne protein |               | 0.95 | 0.08 | 1   | 1.07 | 4.81 | 1   | n/a |      |



|                     |              |       |       |     |      |      |     |      |
|---------------------|--------------|-------|-------|-----|------|------|-----|------|
|                     |              | 1.01  | 0.08  | 1   | 1.12 | 0.11 | n/a | 1.06 |
|                     |              | 0.91  | 0.1   | 1   | 1.11 | 0.08 | n/a | 1.08 |
|                     |              | 0.99  | 0.02  | 1   | 0.8  | 0.14 | n/a | 0.78 |
|                     | hypothetica  | 7.47  | 1.8   | 1   | n/a  | n/a  | n/a | 0.77 |
|                     | hypothetica  | 10.61 | 1.62  | 1   | n/a  | n/a  | n/a | 0.71 |
|                     | putative ba  | 20.49 | 1.92  | 1   | n/a  | n/a  | n/a | 0.67 |
|                     | hypothetica  | 1.72  | 0.32  | 1   | n/a  | n/a  | n/a | 0.93 |
|                     | putative ba  | 11.2  | 1.94  | 1   | n/a  | n/a  | n/a | 0.85 |
| steB                | outer mem    | 10.15 | 1.45  | 1   | n/a  | n/a  | n/a | 1.16 |
|                     | conserved    | 19.87 | 2.42  | 1   | n/a  | n/a  | n/a | 0.69 |
|                     | putative ba  | 8.7   | 0.65  | 1   | n/a  | n/a  | n/a | 0.69 |
|                     | hypothetica  | 7.2   | 1.61  | 1   | n/a  | n/a  | n/a | 0.87 |
|                     | putative ex  | 12.08 | 1.54  | 1   | n/a  | n/a  | n/a | 0.92 |
| steD                | fimbrial sut | 10.49 | 3.69  | 1   | n/a  | n/a  | n/a | 1.06 |
|                     | hypothetica  | 1.95  | 0.28  | 1   | n/a  | n/a  | n/a | 1.13 |
|                     | hypothetica  | 5.57  | 2.93  | 1   | n/a  | n/a  | n/a | 0.71 |
|                     | putative ba  | 15.93 | 4.26  | 1   | n/a  | n/a  | n/a | 0.83 |
|                     | putative se  | 13.07 | 3.07  | 1   | n/a  | n/a  | n/a | 0.79 |
|                     | putative ba  | 15.36 | 4.86  | 1   | n/a  | n/a  | n/a | 0.84 |
|                     | hypothetica  | 6.06  | 2.01  | 1   | n/a  | n/a  | n/a | 1.3  |
|                     | probable bi  | 7.03  | 3.35  | 1   | n/a  | n/a  | n/a | 1.26 |
|                     | putative ba  | 13.72 | 2.24  | 1   | n/a  | n/a  | n/a | 0.81 |
|                     | putative ba  | 25.58 | 3.17  | 1   | n/a  | n/a  | n/a | 0.69 |
|                     | hypothetica  | 9.34  | 2.43  | 1   | n/a  | n/a  | n/a | 1.13 |
|                     | conserved    | 5.01  | 1     | 1   | n/a  | n/a  | n/a | 0.84 |
| rfbX                | putative O-  | 11.44 | 4.49  | 1   | n/a  | n/a  | n/a | 0.81 |
|                     | putative ex  | 8.36  | 2.01  | 1   | n/a  | n/a  | n/a | 0.83 |
| ssB                 | single strar | 9.52  | 1.59  | 1   | n/a  | n/a  | n/a | 1.13 |
|                     | hypothetica  | 22.37 | 3.54  | 1   | n/a  | n/a  | n/a | 1.23 |
|                     | hypothetica  | 28.31 | 11.19 | 1   | n/a  | n/a  | n/a | 1.04 |
|                     | hypothetica  | 11.59 | 4.9   | 1   | n/a  | n/a  | n/a | 1.12 |
|                     | putative arr | 12.04 | 3.4   | 1   | n/a  | n/a  | n/a | 1.12 |
| pilL                | putative ex  | 22.04 | 8.09  | 1   | n/a  | n/a  | n/a | 1.09 |
|                     |              | n/a   | n/a   | n/a | n/a  | n/a  | n/a | n/a  |
|                     |              | n/a   | n/a   | n/a | n/a  | n/a  | n/a | n/a  |
|                     |              | n/a   | n/a   | n/a | n/a  | n/a  | n/a | n/a  |
|                     |              | n/a   | n/a   | n/a | n/a  | n/a  | n/a | n/a  |
|                     |              | n/a   | n/a   | n/a | n/a  | n/a  | n/a | n/a  |
|                     |              | n/a   | n/a   | n/a | n/a  | n/a  | n/a | n/a  |
| caiB                | L-carnitine  | 1     | 0.07  | 1   | 1.07 | 0.13 | 1   | 1.16 |
|                     | conserved    | 1.05  | 0.11  | 1   | 1.09 | 0.15 | 1   | 1.36 |
| ttdB                | tartrate def | 0.96  | 0.08  | 1   | 1.08 | 0.09 | 1   | 1.32 |
|                     | putative ex  | 0.68  | 0.06  | 1   | 1.1  | 0.11 | 1   | 1.44 |
| perone, DnaJ family |              | 0.07  | 0.02  | 1   | 0.86 | 0.1  | 1   | n/a  |
|                     | lysR-family  | 0.93  | 0.08  | 1   | 1.06 | 0.19 | 1   | 0.93 |
| dxr                 | 1-deoxy-D-   | 0.91  | 0.1   | 1   | 1.24 | 0.37 | 1   | 1.12 |
| rspA                | starvation s | 0.91  | 0.08  | 1   | 0.88 | 0.38 | 1   | 0.73 |
| hyaD2               | hydrogenas   | 1.02  | 0.24  | 1   | 0.7  | 0.72 | 1   | 0.8  |
| treR                | trehalose o  | 0.87  | 0.1   | 1   | 1.07 | 0.14 | 1   | 1.16 |
| cbiC                |              | 0.76  | 0.06  | 1   | 0.78 | 0.2  | 1   | 0.81 |
| talB                | transaldola  | 0.9   | 0.11  | 1   | 0.99 | 0.15 | 1   | 1.16 |
| trpD                | anthranilate | 0.95  | 0.12  | 1   | 0.87 | 0.15 | 1   | 0.81 |

|                          |               |      |      |   |      |      |     |      |
|--------------------------|---------------|------|------|---|------|------|-----|------|
| cbiM                     |               | 0.94 | 0.08 | 1 | 0.76 | 0.12 | 1   | 0.74 |
| trpB                     | tryptophan    | 0.87 | 0.11 | 1 | 0.71 | 0.2  | 1   | 0.81 |
|                          |               | 0.45 | 0.07 | 1 | 1    | 0.26 | 1   | n/a  |
| hepA                     | probable A    | 0.96 | 0.12 | 1 | 1.26 | 0.34 | 1   | 1.12 |
| codB                     | cytosine pe   | 0.98 | 0.09 | 1 | 0.98 | 0.11 | 1   | 1.27 |
| fiber assembly like-prot |               | 0.15 | 0.02 | 1 | 0.78 | 0.14 | 1   | n/a  |
| copR                     | response r    | 0.88 | 0.04 | 1 | 0.77 | 0.25 | 1   | 0.86 |
|                          | conserved     | 1.01 | 0.12 | 1 | 1.04 | 0.28 | 1   | 0.77 |
| rimJ                     | ribosomal-p   | 1.05 | 0.13 | 1 | 0.93 | 0.42 | 1   | 0.76 |
|                          | conserved     | 1.02 | 0.06 | 1 | 0.8  | 0.21 | 1   | 0.86 |
|                          | putative me   | 1.07 | 0.03 | 1 | 0.77 | 0.18 | 1   | 0.77 |
| htrB                     | lipid A bios  | 0.98 | 0.1  | 1 | 0.83 | 0.25 | 1   | 0.83 |
|                          | conserved     | 0.95 | 0.09 | 1 | 0.99 | 0.3  | 1   | 0.72 |
| glpD                     | aerobic gly   | 0.77 | 0.09 | 1 | 1.35 | 0.21 | 1   | 1.44 |
| ggt                      | gamma-glu     | 0.84 | 0.08 | 1 | 1.24 | 0.16 | 1   | 1.37 |
| yjJA                     | putative se   | 0.92 | 0.14 | 1 | 1.44 | 0.3  | 1   | 1.16 |
| yjJX                     |               | 0.47 | 0.1  | 1 | 1.25 | 0.41 | 1   | 1.17 |
|                          | putative ba   | 1.09 | 0.14 | 1 | 0.93 | 0.18 | 0   | 0.86 |
|                          | putative me   | 0.96 | 0.1  | 1 | 1.17 | 0.11 | 1   | 1.19 |
| rob                      | right origin- | 0.94 | 0.11 | 1 | 1.2  | 0.21 | 1   | 1.2  |
|                          |               | 0.96 | 0.09 | 1 | 1.02 | 0.13 | 1   | 1.07 |
| osphate synthase         |               | 0.12 | 0.03 | 1 | 1.19 | 0.32 | 1   | n/a  |
| iroD                     | putative fer  | 0.96 | 0.12 | 1 | 1.11 | 0.13 | 1   | 1.21 |
| iron protein             |               | 0.11 | 0.01 | 1 | 1.35 | 0.23 | 1   | n/a  |
| rotein                   |               | 0.27 | 0.03 | 1 | 1.07 | 0.22 | 1   | n/a  |
| ine protein              |               | 0.32 | 0.04 | 1 | 0.96 | 0.11 | 1   | n/a  |
| iroN                     | TonB-depe     | 0.97 | 0.1  | 1 | 1.01 | 0.08 | 1   | 1.14 |
| rotein                   |               | 1.1  | 0.14 | 1 | 1.22 | 0.25 | 1   | n/a  |
| hpchH                    | 2,4-dihydro   | 0.89 | 0.03 | 1 | 0.92 | 0.14 | 1   | 0.83 |
|                          | putative de   | 0.84 | 0.11 | 1 | 1.02 | 0.27 | 1   | 0.99 |
|                          | putative ac   | 1.02 | 0.08 | 1 | 0.82 | 0.08 | 1   | 1.03 |
| gcvR                     | glycine clea  | 1.13 | 0.07 | 1 | 0.86 | 0.12 | 1   | 1.03 |
| ycaD                     | probable tr   | 0.99 | 0.1  | 1 | 0.82 | 0.1  | 1   | 0.83 |
| mukE                     | KicA protei   | 1.07 | 0.13 | 1 | 0.86 | 0.13 | 1   | 0.83 |
|                          | hypothetica   | 0.98 | 0.15 | 1 | 1.3  | 0.06 | n/a | 1.33 |
|                          | putative RM   | 0.92 | 0.13 | 1 | 0.89 | 0.11 | 1   | 1.05 |
| ilar to phage tail assem |               | 0.11 | 0.04 | 1 | 0.83 | 0.36 | 1   | n/a  |
|                          | conserved     | 1.02 | 0.14 | 1 | 1.17 | 0.21 | 1   | 1.51 |
| yjJP                     | putative me   | 0.95 | 0.08 | 1 | 1.14 | 0.16 | 1   | 1.42 |
|                          | conserved     | 0.99 | 0.12 | 1 | 1.15 | 0.25 | 1   | 1.15 |
| rotein                   |               | 0.1  | 0.02 | 1 | 1.01 | 0.08 | 1   | n/a  |
|                          | putative me   | 0.92 | 0.05 | 1 | 0.99 | 0.26 | 1   | 1.11 |
| cadB                     | probable ca   | 0.96 | 0.09 | 1 | 0.93 | 0.15 | 1   | 0.96 |
|                          |               | 0.1  | 0.04 | 1 | 0.95 | 0.2  | n/a | n/a  |
|                          | putative Gr   | 0.89 | 0.13 | 1 | 1.33 | 0.08 | 1   | 1.47 |
| ike IIB component 1      |               | 0.22 | 0.03 | 1 | 1.07 | 0.05 | 1   | n/a  |
| hypD                     | hydrogenas    | 0.97 | 0.11 | 1 | 1.11 | 0.08 | 1   | 1.14 |
| endonuclease             |               | 0.05 | 0.01 | 1 | 1.05 | 0.08 | 1   | n/a  |
|                          | putative me   | 0.94 | 0.07 | 1 | 1.15 | 0.14 | 1   | 1.03 |
|                          | putative pr   | 0.59 | 0.16 | 1 | 1    | 0.39 | 1   | 0.86 |
|                          | conserved     | 1.08 | 0.13 | 1 | 0.86 | 0.31 | 1   | 0.87 |
|                          | putative me   | 1.06 | 0.13 | 1 | 0.7  | 0.05 | 1   | 0.76 |

|                            |                     |      |      |   |      |          |       |      |
|----------------------------|---------------------|------|------|---|------|----------|-------|------|
| trmU                       | tRNA (5-mi          | 1.01 | 0.13 | 1 | 0.75 | 0.12     | 1     | 0.77 |
|                            | putative Te         | 0.94 | 0.15 | 1 | 0.89 | 0.27     | 1     | 0.8  |
| bigA                       |                     | 0.48 | 0.08 | 1 | 1.04 | 0.14     | 1     | 1.12 |
|                            | putative ex         | 1.02 | 0.12 | 1 | 0.7  | 0.11     | 1     | 0.96 |
| regulator                  |                     | 0.37 | 0.03 | 1 | 1.12 | 0.1      | 1 n/a |      |
|                            |                     | 0.08 | 0.02 | 1 | 1.1  | 0.08     | 1 n/a |      |
| nase                       |                     | 0.12 | 0.03 | 1 | 1.12 | 0.11     | 1 n/a |      |
| porter                     |                     | 0.05 | 0.01 | 1 | 1.12 | 0.13     | 1 n/a |      |
|                            |                     | 0.16 | 0.02 | 1 | 1.13 | 0.14     | 1 n/a |      |
|                            |                     | 0.32 | 0.05 | 1 | 1.17 | 0.09     | 1     | 1.11 |
|                            | putative tra        | 0.93 | 0.07 | 1 | 0.92 | 0.1      | 1     | 0.93 |
| flhD                       | flagellar tra       | 0.98 | 0.11 | 1 | 1.03 | 0.33     | 0     | 0.86 |
| btuE                       | putative gl         | 1.1  | 0.14 | 1 | 0.74 | 0.13     | 1     | 0.78 |
| ugd                        | UDP-gluco           | 0.87 | 0.02 | 1 | 0.82 | 0.07     | 1     | 1.01 |
| recF                       | recF protei         | 0.79 | 0.1  | 1 | 1.34 | 0.18     | 1     | 1.53 |
| yfhC                       | conserved           | 0.93 | 0.05 | 1 | 1.07 | 0.22     | 1     | 1.08 |
| mtn                        | MTA/SAH i           | 0.94 | 0.13 | 1 | 1.01 | 0.11     | 1     | 0.97 |
| ftsW                       | cell divisor        | 0.96 | 0.04 | 1 | 0.99 | 0.16     | 1     | 0.91 |
| tbpA                       | thiamine-bi         | 0.81 | 0.08 | 1 | 0.92 | 0.19     | 1     | 1.01 |
|                            | conserved           | 0.93 | 0.12 | 1 | 1.04 | 0.4      | 1     | 1.09 |
|                            | conserved           | 0.9  | 0.13 | 1 | 0.77 | 0.15     | 1     | 0.81 |
| fliO                       | flagellar pr        | 1.15 | 0.19 | 1 | 0.9  | 0.04     | 1     | 0.86 |
|                            | hydroxyeth          | 0.9  | 0.09 | 1 | 0.78 | 0.12     | 1     | 0.89 |
| fumC                       | fumarate h          | 0.91 | 0.1  | 1 | 0.82 | 0.14     | 1     | 0.8  |
|                            | CDP-abequose synthe | 0.22 | 0.04 | 1 | 0.85 | 0.18     | 0 n/a |      |
| rbcC                       | dTDP-4-de           | 0.78 | 0.08 | 1 | 0.76 | 0.27     | 1     | 1.04 |
|                            | putative hy         | 0.92 | 0.11 | 1 | 1.46 | 0.13     | 1     | 1.55 |
| pyrH                       | uridine 5'-n        | 1    | 0.08 | 1 | 1.01 | 0.11     | 1     | 0.98 |
| dxs                        | 1-deoxyxyl          | 0.92 | 0.07 | 1 | 1.07 | 0.36     | 1     | 1.06 |
| secA                       | preprotein i        | 0.9  | 0.07 | 1 | 1.01 | 0.26     | 1     | 1.1  |
| nuoJ                       | NADH dehy           | 1.07 | 0.05 | 1 | 0.9  | 0.07     | 1     | 0.89 |
|                            |                     | 0.35 | 0.07 | 0 | 1.16 | 0.44     | 0 n/a |      |
|                            | putative DN         | 0.59 | 0.05 | 1 | 0.82 | 0.04 n/a |       | 0.73 |
|                            | putative AE         | 0.95 | 0.07 | 1 | 0.96 | 0.17     | 1     | 0.85 |
| fsr                        | fosmidomy           | 1.03 | 0.12 | 1 | 0.97 | 0.14     | 1     | 0.83 |
| frdC                       | fumarate re         | 1.03 | 0.11 | 1 | 1.1  | 0.17     | 1     | 1.26 |
| ilar to terminase large c  |                     | 0.05 | 0.01 | 1 | 0.97 | 0.14     | 1 n/a |      |
|                            | hypothetica         | 0.53 | 0.08 | 1 | 0.87 | 0.12 n/a |       | 0.79 |
| tolC                       | outer mem           | 0.89 | 0.11 | 1 | 1.16 | 0.08     | 1     | 1.35 |
|                            | probable ai         | 1    | 0.12 | 1 | 1.12 | 0.06     | 1     | 1.12 |
| gatD                       | galactitol-1        | 1.03 | 0.13 | 1 | 1.14 | 0.14     | 1     | 1.26 |
| ais                        | Ais protein         | 0.89 | 0.09 | 1 | 0.96 | 0.1      | 1     | 1.02 |
| ligA                       | DNA ligase          | 0.87 | 0.07 | 1 | 0.81 | 0.16     | 1     | 1.01 |
| garR                       | 2-hydroxy-          | 1.02 | 0.12 | 1 | 1.15 | 0.24     | 1     | 0.91 |
|                            | putative ex         | 1.03 | 0.1  | 1 | 1.1  | 0.09 n/a |       | 1.09 |
| ilar to major tail protein |                     | 0.09 | 0.02 | 1 | 0.87 | 0.37     | 1 n/a |      |
|                            |                     | 0.17 | 0.03 | 1 | 1.21 | 0.27 n/a | n/a   |      |
| pssA                       | CDP-diacyl          | 1.05 | 0.12 | 1 | 1.16 | 0.12     | 1     | 1.24 |
| bacA                       | bacitracin r        | 1.19 | 0.13 | 1 | 1.07 | 0.09     | 1     | 1    |
|                            | hypothetica         | 0.95 | 0.1  | 1 | 1.17 | 0.25     | 1     | 1.27 |
|                            | ATP-deper           | 0.93 | 0.08 | 1 | 1.15 | 0.08     | 1     | 1.4  |
|                            | thiamine-m          | 0.96 | 0.07 | 1 | 0.92 | 0.07     | 1     | 0.82 |

|                             |               |      |      |   |      |      |     |      |
|-----------------------------|---------------|------|------|---|------|------|-----|------|
| cysM                        | cysteine sy   | 0.88 | 0.07 | 1 | 0.89 | 0.07 | 1   | 0.95 |
| moeB                        | molybdopte    | 0.97 | 0.08 | 1 | 0.94 | 0.18 | 1   | 0.76 |
| dnaQ                        | DNA polym     | 0.9  | 0.09 | 1 | 1.08 | 0.13 | 1   | 1.03 |
| ssaU                        | putative typ  | 1.08 | 0.1  | 1 | 0.75 | 0.12 | 1   | 0.82 |
| hisM                        | histidine tra | 0.96 | 0.11 | 1 | 0.83 | 0.15 | 1   | 0.84 |
| dnaJ                        | DnaJ prote    | 1.01 | 0.14 | 1 | 1.25 | 0.23 | 1   | 1.08 |
| tonB                        | TonB prote    | 0.89 | 0.1  | 1 | 0.68 | 0.1  | 1   | 0.73 |
| eutK                        | ethanolami    | 0.84 | 0.08 | 1 | 0.87 | 0.11 | 1   | 0.93 |
| yneB                        | putative alc  | 0.96 | 0.1  | 1 | 1.24 | 0.24 | 1   | 1.46 |
| carA                        | carbamoyl-    | 0.83 | 0.06 | 1 | 1.11 | 0.19 | 1   | 1.04 |
| eutH                        | putative me   | 0.96 | 0.06 | 1 | 0.9  | 0.2  | 1   | 0.93 |
| argH                        | argininosuc   | 1.03 | 0.05 | 1 | 1.2  | 0.06 | 1   | 1.27 |
| ybgR                        | probable ca   | 1.02 | 0.09 | 1 | 0.84 | 0.06 | 1   | 0.88 |
| tolR                        | tolR proteir  | 1    | 0.09 | 1 | 1.02 | 0.21 | 1   | 0.93 |
| nrde                        | ribonucleos   | 0.86 | 0.08 | 1 | 1.11 | 0.15 | 1   | 1.2  |
| marA                        | multiple an   | 1.09 | 0.05 | 1 | 0.74 | 0.24 | 1   | 0.72 |
| sicP                        | chaperone     | 0.77 | 0.08 | 1 | 1.01 | 0.13 | 1   | 1.07 |
|                             | conserved     | 1.01 | 0.07 | 1 | 0.84 | 0.1  | 1   | 0.79 |
|                             | putative me   | 0.96 | 0.09 | 1 | 1.06 | 0.06 | 1   | 1.42 |
| yaeQ                        | conserved     | 0.86 | 0.1  | 1 | 1.04 | 0.23 | 1   | 0.86 |
| phoP                        | transcriptio  | 1.03 | 0.08 | 1 | 0.79 | 0.16 | 1   | 0.79 |
| nfi                         | putative en   | 0.96 | 0.12 | 1 | 1.2  | 0.11 | 1   | 1.3  |
|                             | hypothetica   | 1.08 | 0.15 | 1 | 1.14 | 0.43 | 0   | 0.97 |
| aidB                        | probable ar   | 0.92 | 0.09 | 1 | 1.2  | 0.2  | 1   | 1.19 |
| spiC                        | putative pa   | 1.07 | 0.15 | 1 | 0.6  | 0.15 | 1   | 0.86 |
| fabH                        | 3-oxoacyl-[   | 0.93 | 0.12 | 1 | 0.81 | 0.34 | 1   | 0.78 |
|                             | putative req  | 0.91 | 0.1  | 1 | 0.61 | 0.13 | 1   | 0.81 |
|                             | putative me   | 1.01 | 0.09 | 1 | 0.8  | 0.16 | 1   | 0.83 |
|                             |               | 1    | 0.07 | 1 | 1.09 | 0.11 | n/a | 1.17 |
|                             |               | 0.13 | 0.02 | 1 | 0.82 | 0.06 | n/a | n/a  |
| csgD                        | putative req  | 0.98 | 0.08 | 1 | 0.9  | 0.12 | 1   | 0.84 |
|                             | putative me   | 0.85 | 0.08 | 1 | 0.87 | 0.09 | 1   | 0.89 |
| yjaH                        | conserved     | 0.93 | 0.06 | 1 | 1.28 | 0.11 | 1   | 1.34 |
| yigC                        | conserved     | 0.99 | 0.04 | 1 | 1.27 | 0.14 | 1   | 1.32 |
| yigF                        | putative me   | 1.1  | 0.08 | 1 | 1.28 | 0.15 | 1   | 1.32 |
| trxA                        | thioredoxin   | 1.05 | 0.1  | 1 | 1.22 | 0.15 | 1   | 1.28 |
| narG                        | respiratory   | 0.96 | 0.1  | 1 | 0.71 | 0.1  | 1   | 0.64 |
|                             | conserved     | 1.08 | 0.16 | 1 | 0.98 | 0.22 | 1   | 0.87 |
|                             | conserved     | 0.91 | 0.07 | 1 | 0.96 | 0.28 | 1   | 0.8  |
| aas                         | 2-acylglyce   | 0.89 | 0.09 | 1 | 1.2  | 0.19 | 1   | 1.07 |
| invE                        | cell invasio  | 0.99 | 0.12 | 1 | 1.07 | 0.16 | 1   | 1.18 |
|                             | putative ph   | 1.14 | 0.11 | 1 | 1.17 | 0.24 | 1   | 1.02 |
| pduK                        | putative pr   | 1.06 | 0.1  | 1 | 0.85 | 0.16 | 1   | 0.84 |
| narU                        | nitrite extru | 0.92 | 0.08 | 1 | 0.75 | 0.1  | 1   | 0.75 |
|                             | putative me   | 0.87 | 0.06 | 1 | 1.35 | 0.27 | 1   | 1.42 |
|                             | conserved     | 0.89 | 0.04 | 1 | 1.37 | 0.17 | 1   | 1.27 |
| ilvL                        | ilvGMEDA      | 1.1  | 0.17 | 0 | 1.44 | 0.15 | 0   | 1.09 |
| ilar to host specificity pr |               | 0.06 | 0.01 | 1 | 0.86 | 0.05 | n/a | n/a  |
| dsbB                        | disulfide bc  | 0.93 | 0.07 | 1 | 0.72 | 0.12 | 1   | 0.85 |
|                             | conserved     | 0.91 | 0.08 | 1 | 0.96 | 0.23 | 0   | 0.79 |
| cysN                        | ATP sulfur    | 0.92 | 0.05 | 1 | 1.03 | 0.09 | 1   | 1.18 |
| yebE                        | conserved     | 0.93 | 0.08 | 1 | 0.73 | 0.08 | 1   | 0.82 |

|                         |               |      |      |   |      |      |     |      |
|-------------------------|---------------|------|------|---|------|------|-----|------|
| rna                     | ribonucleas   | 0.97 | 0.08 | 1 | 1    | 0.15 | 1   | 0.89 |
|                         | putative m    | 1.07 | 0.08 | 1 | 0.64 | 0.07 | 1   | 0.7  |
| entA                    | 2,3-dihydro   | 1.03 | 0.09 | 1 | 0.92 | 0.11 | 1   | 0.79 |
|                         | conserved     | 1.08 | 0.12 | 1 | 0.83 | 0.15 | 1   | 0.78 |
| regulator               |               | 0.18 | 0.02 | 1 | 0.76 | 0.13 | 1   | n/a  |
|                         | probable T    | 0.95 | 0.09 | 1 | 0.65 | 0.07 | 1   | 0.76 |
|                         | conserved     | 0.97 | 0.12 | 1 | 0.78 | 0.12 | 1   | 0.84 |
|                         | putative AE   | 1.05 | 0.18 | 1 | 0.64 | 0.08 | 1   | 0.76 |
| znuC                    | high-affinity | 0.98 | 0.08 | 1 | 0.83 | 0.11 | 1   | 0.84 |
|                         | probable lip  | 0.93 | 0.1  | 1 | 0.88 | 0.2  | 1   | 0.72 |
| ybbW                    |               | 0.88 | 0.11 | 1 | 1.14 | 0.2  | 1   | 0.89 |
| allB                    | putative all  | 0.99 | 0.08 | 1 | 0.93 | 0.09 | 1   | 0.9  |
| lolA                    | outer mem     | 1.01 | 0.06 | 1 | 0.84 | 0.06 | 1   | 0.82 |
|                         | conserved     | 0.93 | 0.1  | 1 | 0.77 | 0.16 | 1   | 0.72 |
| ne protein              |               | 0.89 | 0.09 | 1 | 0.8  | 0.38 | 1   | n/a  |
| appC                    | cytochrome    | 0.99 | 0.04 | 1 | 0.67 | 0.06 | 1   | 0.85 |
|                         | putative m    | 0.91 | 0.1  | 1 | 0.8  | 0.15 | 1   | 0.85 |
|                         | possible A    | 0.95 | 0.1  | 1 | 1.16 | 0.17 | 1   | 1.09 |
| yiaN                    | putative m    | 1.13 | 0.1  | 1 | 1.3  | 0.09 | 1   | 1.17 |
| ft                      |               | 0.36 | 0.03 | 1 | 0.72 | 0.13 | 1   | n/a  |
|                         | hypothetica   | 1    | 0.1  | 1 | 1.38 | 0.17 | 1   | 1.23 |
|                         | putative m    | 1.04 | 0.13 | 1 | 1.12 | 0.23 | 1   | 1.15 |
|                         | conserved     | 0.95 | 0.1  | 1 | 1.02 | 0.12 | 1   | 1.17 |
| regulator, LysR family  |               | 0.07 | 0.01 | 1 | 1.09 | 0.17 | 1   | n/a  |
| nt RNA helicase-like pr |               | 0.93 | 0.11 | 1 | 1.04 | 0.11 | 1   | n/a  |
|                         | putative fla  | 0.93 | 0.09 | 1 | 1.05 | 0.11 | 1   | 1.08 |
| speA                    | biosynthetic  | 0.88 | 0.09 | 1 | 1.14 | 0.13 | 1   | 1.24 |
| rotein                  |               | 0.26 | 0.05 | 1 | 1.13 | 0.22 | 1   | n/a  |
|                         |               | 0.88 | 0.1  | 1 | 1.09 | 0.23 | 1   | 1.13 |
| drogenase               |               | 0.13 | 0.01 | 1 | 1.13 | 0.17 | 1   | n/a  |
|                         |               | 0.93 | 0.05 | 1 | 1.05 | 0.13 | n/a | 1.21 |
| ybaX                    | conserved     | 0.93 | 0.06 | 1 | 1.09 | 0.17 | 1   | 0.97 |
| uspB                    | universal s   | 1.07 | 0.08 | 1 | 1.22 | 0.38 | 1   | 1.1  |
|                         | conserved     | 1.04 | 0.15 | 1 | 0.93 | 0.15 | 1   | 1.03 |
|                         |               | 0.78 | 0.07 | 1 | 1.06 | 0.19 | n/a | 0.93 |
| pmbA                    | putative Pn   | 0.88 | 0.13 | 1 | 1.3  | 0.21 | 1   | 1.15 |
| osmY                    | Putative pe   | 1.01 | 0.09 | 1 | 1.07 | 0.15 | 1   | 1.17 |
|                         | putative tra  | 0.92 | 0.12 | 1 | 1.02 | 0.12 | 1   | 1.12 |
|                         | putative RN   | 0.89 | 0.07 | 1 | 0.78 | 0.09 | 1   | 0.83 |
| rtn                     | rtn protein   | 0.91 | 0.12 | 1 | 0.86 | 0.09 | 1   | 0.88 |
|                         | putative ex   | 0.93 | 0.08 | 1 | 0.75 | 0.06 | 1   | 0.84 |
| baeR                    | putative tw   | 0.95 | 0.14 | 1 | 0.82 | 0.11 | 1   | 0.89 |
| nfo                     | endonuclea    | 0.95 | 0.1  | 1 | 0.87 | 0.08 | 1   | 0.93 |
| udk                     | uridine kin   | 1.05 | 0.1  | 1 | 0.93 | 0.39 | 1   | 0.98 |
| proP                    | ProP effect   | 0.97 | 0.11 | 1 | 0.74 | 0.09 | 1   | 0.92 |
| yibK                    | putative RN   | 0.96 | 0.15 | 1 | 1.19 | 0.13 | 1   | 1.27 |
| yiaD                    | putative ou   | 1.18 | 0.23 | 0 | 1.47 | 0.37 | 0   | 0.67 |
| yeiB                    | putative m    | 0.91 | 0.04 | 1 | 0.9  | 0.13 | 1   | 0.92 |
| hemK                    | HemK prot     | 0.84 | 0.07 | 1 | 0.74 | 0.13 | 1   | 0.82 |
|                         | hypothetica   | 0.97 | 0.11 | 1 | 1.09 | 0.15 | 1   | 1.22 |
|                         |               | 0.59 | 0.06 | 1 | 0.86 | 0.18 | n/a | 0.78 |
| yjFM                    | conserved     | 0.94 | 0.09 | 1 | 1.09 | 0.09 | 1   | 1.11 |

|                       |              |      |      |   |      |          |       |      |
|-----------------------|--------------|------|------|---|------|----------|-------|------|
| icc                   | conserved    | 0.91 | 0.06 | 1 | 1.17 | 0.11     | 1     | 1.34 |
|                       | conserved    | 1.01 | 0.08 | 1 | 1.05 | 0.09     | 1     | 1.27 |
| exbD                  | biopolymer   | 0.97 | 0.03 | 1 | 1.11 | 0.08     | 1     | 1.29 |
|                       | putative me  | 1.01 | 0.09 | 1 | 1.08 | 0.15     | 1     | 1.06 |
|                       | conserved    | 0.98 | 0.13 | 1 | 1.08 | 0.11     | 1     | 1.21 |
| marT                  |              | 0.97 | 0.16 | 1 | 1.29 | 0.09     | 1     | 1.48 |
|                       | probable al  | 0.98 | 0.09 | 1 | 1.07 | 0.1      | 1     | 1.34 |
| fnr                   | fumarate a   | 1.01 | 0.08 | 1 | 0.7  | 0.08     | 1     | 0.82 |
| mgtB                  | Magnesium    | 0.88 | 0.12 | 1 | 1.29 | 0.13     | 1     | 1.37 |
|                       | hypothetica  | 0.74 | 0.13 | 1 | 1.1  | 0.17     | 1     | 1.21 |
|                       | conserved    | 0.88 | 0.09 | 1 | 1.15 | 0.08     | 1     | 1.26 |
|                       | putative ac  | 0.89 | 0.24 | 1 | 0.84 | 0.26     | 1     | 0.75 |
| ybhE                  | conserved    | 0.97 | 0.12 | 1 | 0.89 | 0.1      | 1     | 0.81 |
|                       | conserved    | 0.98 | 0.13 | 1 | 1.21 | 0.24     | 1     | 1.19 |
| pqiA                  | putative inr | 1.03 | 0.05 | 1 | 0.7  | 0.08     | 1     | 0.78 |
| tolB                  | tolB protein | 0.82 | 0.08 | 1 | 0.92 | 0.13     | 1     | 0.84 |
| bioF                  | 8-amino-7-   | 0.94 | 0.08 | 1 | 0.9  | 0.1      | 1     | 0.75 |
|                       | conserved    | 1.07 | 0.04 | 1 | 0.97 | 0.09     | 1     | 0.84 |
| pcgL                  | D-alanyl-D-  | 0.98 | 0.07 | 1 | 0.67 | 0.06     | 1     | 0.76 |
| cyoD                  | cytochrome   | 1.09 | 0.08 | 1 | 0.88 | 0.12     | 1     | 0.97 |
|                       | hypothetica  | 1.14 | 0.07 | 1 | 1.1  | 0.2      | 1     | 1.22 |
|                       | conserved    | 0.91 | 0.11 | 1 | 1.03 | 0.04     | 1     | 1.12 |
| ybaB                  | conserved    | 0.97 | 0.15 | 1 | 0.94 | 0.11     | 1     | 0.92 |
| ybdZ                  | conserved    | 0.96 | 0.19 | 0 | 1.24 | 0.32     | 0     | 0.87 |
| upp                   | uracil phos  | 1.06 | 0.06 | 1 | 0.91 | 0.1      | 1     | 1.13 |
| ative RecA/RadA recom |              | 0.07 | 0.02 | 1 | 0.81 | 0.1      | 1 n/a |      |
| yohN                  | conserved    | 1.15 | 0.12 | 1 | 0.79 | 0.05     | 1     | 0.82 |
|                       | hypothetica  | 0.87 | 0.08 | 1 | 1.17 | 0.12     | 1     | 1.04 |
| yajD                  | conserved    | 0.9  | 0.09 | 1 | 1.06 | 0.08     | 1     | 1.3  |
| grxC                  | glutaredoxi  | 0.98 | 0.09 | 1 | 1.25 | 0.2      | 1     | 1.32 |
| yjfO                  | putative ex  | 0.77 | 0.11 | 1 | 1.11 | 0.14     | 1     | 1.17 |
| hypC                  | hydrogenase  | 0.97 | 0.08 | 1 | 1.05 | 0.11     | 1     | 1.15 |
|                       | conserved    | 0.97 | 0.04 | 1 | 0.78 | 0.08     | 1     | 0.78 |
|                       | putative se  | 1.01 | 0.05 | 1 | 0.79 | 0.4      | 1     | 0.92 |
| celC                  | phosphoen    | 1.1  | 0.09 | 1 | 0.72 | 0.07     | 1     | 0.77 |
|                       | putative PT  | 1.01 | 0.06 | 1 | 1.24 | 0.08     | 1     | 1.15 |
|                       |              | 0.98 | 0.04 | 1 | 1.34 | 0.09     | 1     | 1.29 |
| oadG                  | oxaloaceta   | 1.06 | 0.08 | 1 | 1.04 | 0.13     | 1     | 0.86 |
|                       | putative ch  | 0.89 | 0.11 | 1 | 1.1  | 0.1      | 1     | 1.02 |
| citC                  | citrate-sodi | 1.01 | 0.09 | 1 | 1.11 | 0.09     | 1     | 1.09 |
|                       | hypothetica  | 0.9  | 0.08 | 1 | 1.12 | 0.03     | 1     | 1.05 |
|                       | putative me  | 1.05 | 0.08 | 1 | 1.13 | 0.17     | 1     | 1.12 |
| imp                   | organic sol  | 0.97 | 0.11 | 1 | 1.08 | 0.14     | 1     | 0.99 |
|                       | conserved    | 1.01 | 0.16 | 1 | 1.2  | 0.56     | 1     | 0.7  |
|                       | putative ph  | 1.02 | 0.13 | 1 | 0.68 | 0.08     | 1     | 0.86 |
|                       | putative me  | 0.99 | 0.1  | 1 | 0.66 | 0.09     | 1     | 0.73 |
|                       | conserved    | 0.96 | 0.1  | 1 | 0.64 | 0.07     | 1     | 0.74 |
| rotein                |              | 0.19 | 0.04 | 1 | 0.72 | 0.16     | 1 n/a |      |
|                       | conserved    | 0.95 | 0.14 | 1 | 1.22 | 0.3      | 1     | 1.11 |
|                       |              | 0.04 | 0.01 | 1 | 0.66 | 0.1 n/a  | n/a   |      |
| 1                     |              | 0.05 | 0.01 | 1 | 0.64 | 0.06 n/a | n/a   |      |
|                       |              | 0.05 | 0.02 | 1 | 0.62 | 0.08 n/a | n/a   |      |

|                           |                  |        |       |     |      |      |     |        |
|---------------------------|------------------|--------|-------|-----|------|------|-----|--------|
|                           |                  | 0.03   | 0.01  | 1   | 0.62 | 0.07 | n/a | n/a    |
| ssembly                   |                  | 0.04   | 0.01  | 1   | 0.64 | 0.05 | n/a | n/a    |
|                           |                  | 0.09   | 0.01  | 1   | 0.73 | 0.13 | n/a | n/a    |
|                           | n/a              | n/a    | n/a   | n/a | n/a  | n/a  | n/a | n/a    |
|                           | n/a              | n/a    | n/a   | n/a | n/a  | n/a  | n/a | n/a    |
|                           | n/a              | n/a    | n/a   | n/a | n/a  | n/a  | n/a | n/a    |
|                           | n/a              | n/a    | n/a   | n/a | n/a  | n/a  | n/a | n/a    |
|                           | n/a              | n/a    | n/a   | n/a | n/a  | n/a  | n/a | n/a    |
|                           |                  | 0.02   | 0.01  | 1   | 0.61 | 0.1  | n/a | n/a    |
|                           | putative re      | 0.89   | 0.14  | 1   | 0.98 | 0.05 |     | 1 1.11 |
|                           |                  | 1.01   | 0.14  | 1   | 1.03 | 0.03 | n/a | 1.15   |
|                           |                  | 0.15   | 0.04  | 1   | 0.83 | 0.12 | n/a | n/a    |
|                           |                  | 0.06   | 0.03  | 1   | 0.88 | 0.05 | n/a | n/a    |
| live tail assembly protei |                  | 0.11   | 0.03  | 1   | 0.8  | 0.05 |     | 1 n/a  |
| speC                      |                  | 0.93   | 0.06  | 1   | 1.09 | 0.1  |     | 1 1.13 |
|                           | hypothetica      | 3.54   | 0.78  | 1   | n/a  | n/a  | n/a | 0.93   |
| kdpB                      | potassium-       | 1.1    | 0.07  | 1   | 0.93 | 0.1  | n/a | 0.8    |
|                           | putative ba      | 3.46   | 1.29  | 1   | n/a  | n/a  | n/a | 0.83   |
|                           | putative ba      | 15.85  | 1.72  | 1   | n/a  | n/a  | n/a | 0.82   |
|                           | putative ba      | 12.32  | 1.98  | 1   | n/a  | n/a  | n/a | 0.7    |
|                           | putative ba      | 5.88   | 1.2   | 1   | n/a  | n/a  | n/a | 0.74   |
|                           | hypothetica      | 3.49   | 0.43  | 1   | n/a  | n/a  | n/a | 0.94   |
|                           | putative ba      | 2.66   | 1.2   | 1   | n/a  | n/a  | n/a | 0.77   |
|                           | putative ba      | 19.43  | 6.16  | 1   | n/a  | n/a  | n/a | 0.74   |
|                           | putative ba      | 15.16  | 8.06  | 1   | n/a  | n/a  | n/a | 0.72   |
|                           | putative me      | 9.21   | 2.33  | 1   | n/a  | n/a  | n/a | 0.9    |
|                           | conserved        | 28.78  | 4.12  | 1   | n/a  | n/a  | n/a | 0.88   |
|                           | putative ba      | 9.82   | 1.71  | 1   | n/a  | n/a  | n/a | 0.73   |
|                           | putative pe      | 9.13   | 4.28  | 1   | n/a  | n/a  | n/a | 0.81   |
|                           | putative ba      | 14.83  | 2.69  | 1   | n/a  | n/a  | n/a | 0.76   |
| steF                      | fimbrial sut     | 0.95   | 0.19  | 0   | n/a  | n/a  | n/a | 1      |
|                           | putative crc     | 10.53  | 2.4   | 1   | n/a  | n/a  | n/a | 0.96   |
|                           | hypothetica      | 1.59   | 0.25  | 1   | n/a  | n/a  | n/a | 0.77   |
|                           | hypothetica      | 4.71   | 1.86  | 1   | n/a  | n/a  | n/a | 0.47   |
|                           |                  | 3.25   | 2.64  | 1   | 0.5  | 0.42 | n/a | 0.82   |
|                           | putative ba n.d. | n.d.   | n.d.  | 1   | n/a  | n/a  | n/a | 0.7    |
| oadG                      | oxaloaceta       | 1.59   | 0.46  | 1   | 1.1  | 0.47 | n/a | 0.85   |
|                           | possible er      | 2.94   | 0.12  | 1   | 1    | 0.15 | n/a | 1.08   |
|                           | putative re      | 3.38   | 1.51  | 1   | n/a  | n/a  | n/a | 1.11   |
|                           | hypothetica n.d. | n.d.   | n.d.  | 1   | n/a  | n/a  | n/a | 1.44   |
| int                       | bacterioph       | 26.84  | 9.26  | 1   | n/a  | n/a  | n/a | 1.11   |
|                           | Bacterioph       | 38.65  | 14.21 | 1   | n/a  | n/a  | n/a | 1.06   |
| hsdS                      | subunit S c      | 2.8    | 0.38  | 1   | 1.13 | 0.17 | n/a | 1.04   |
|                           | hypothetica      | 3.04   | 0.29  | 1   | n/a  | n/a  | n/a | 1.21   |
|                           | putative DF      | 509.67 | none  | 1   | n/a  | n/a  | n/a | 1.06   |
|                           | n/a              | n/a    | n/a   | n/a | n/a  | n/a  | n/a | n/a    |
|                           | n/a              | n/a    | n/a   | n/a | n/a  | n/a  | n/a | n/a    |
|                           | n/a              | n/a    | n/a   | n/a | n/a  | n/a  | n/a | n/a    |
|                           | n/a              | n/a    | n/a   | n/a | n/a  | n/a  | n/a | n/a    |
|                           | n/a              | n/a    | n/a   | n/a | n/a  | n/a  | n/a | n/a    |
|                           | n/a              | n/a    | n/a   | n/a | n/a  | n/a  | n/a | n/a    |
|                           |                  | 0.23   | 0.05  | 1   | 0.75 | 0.24 |     | 1 n/a  |

|                            |               |      |      |   |      |      |     |      |
|----------------------------|---------------|------|------|---|------|------|-----|------|
| torC                       |               | 1.02 | 0.06 | 1 | 1.51 | 0.23 | 1   | 1.49 |
| apbA                       | ApbA          | 0.89 | 0.11 | 1 | 1.07 | 0.13 | 1   | 0.95 |
| cbiP                       | putative co   | 1.06 | 0.07 | 1 | 0.82 | 0.14 | 1   | 0.8  |
| nhaA                       | Na(+)/H(+)    | 0.98 | 0.1  | 1 | 1.18 | 0.23 | 1   | 1.07 |
| fixA                       | FixA protei   | 0.97 | 0.18 | 1 | 1.17 | 0.21 | 1   | 1.04 |
| rhaT                       | L rhamnos     | 1.16 | 0.06 | 1 | 1.41 | 0.2  | 1   | 1.32 |
| plsC                       | 1-acyl-glyc   | 1.04 | 0.07 | 1 | 1.28 | 0.13 | 1   | 1.25 |
|                            | conserved     | 0.95 | 0.13 | 1 | 1.23 | 0.17 | 1   | 1.16 |
|                            | conserved     | 0.98 | 0.12 | 1 | 1.1  | 0.11 | 1   | 1.24 |
| acrF                       |               | 1.06 | 0.13 | 1 | 1.12 | 0.13 | 1   | 1.39 |
| ybeL                       | conserved     | 0.94 | 0.13 | 1 | 1.04 | 0.09 | 1   | 0.88 |
| lpdA                       | dihydrolipo   | 0.98 | 0.09 | 1 | 1.06 | 0.34 | 1   | 1    |
| yadI                       | putative PT   | 0.54 | 0.07 | 1 | 0.97 | 0.13 | 1   | 1.01 |
| yaeG                       | conserved     | 0.9  | 0.05 | 1 | 1.02 | 0.03 | 1   | 0.96 |
| cutF                       | copper hon    | 1.03 | 0.12 | 1 | 1.13 | 0.23 | 1   | 0.83 |
|                            |               | 0.2  | 0.05 | 1 | 0.82 | 0.2  | 1   | n/a  |
| or protein                 |               | 0.19 | 0.03 | 1 | 1.28 | 0.16 | 1   | n/a  |
| gntR                       | gluconate t   | 0.84 | 0.1  | 1 | 1.21 | 0.22 | 1   | 1.35 |
| ructose-6-phosphate a      |               | 0.09 | 0.01 | 1 | 1.21 | 0.17 | 1   | n/a  |
| sthD                       | putative firr | 0.81 | 0.16 | 1 | 1.26 | 0.29 | 1   | 1.07 |
| rotein                     |               | 0.13 | 0.12 | 1 | 1.23 | 0.2  | 1   | n/a  |
| se                         |               | 0.27 | 0.05 | 1 | 1.09 | 0.13 | n/a | n/a  |
| stop following codon 1     |               | 0.14 | 0.02 | 1 | 0.87 | 0.09 | 1   | n/a  |
|                            | probable pl   | 0.66 | 0.12 | 1 | 1.17 | 0.12 | 1   | 1.31 |
| thetical protein           |               | 0.22 | 0.08 | 1 | 1    | 0.23 | 1   | n/a  |
| yafJ                       | conserved     | 1.04 | 0.06 | 1 | 1.09 | 0.11 | 1   | 1.02 |
|                            |               | 1.03 | 0.1  | 1 | 1.12 | 0.11 | 1   | 1.03 |
| hpaG                       | 4-hydroxyp    | 0.99 | 0.09 | 1 | 0.77 | 0.12 | 1   | 0.75 |
|                            | putative 2-l  | 1.11 | 0.16 | 1 | 0.8  | 0.16 | 1   | 0.75 |
|                            |               | 0.07 | 0.02 | 1 | 0.88 | 0.32 | n/a | n/a  |
|                            | conserved     | 1.03 | 0.27 | 1 | 1.06 | 0.26 | 0   | 0.77 |
| phoH                       | PhoH prote    | 1.13 | 0.06 | 1 | 0.8  | 0.18 | 1   | 0.77 |
| yceJ                       |               | 1.04 | 0.16 | 1 | 0.92 | 0.34 | 1   | 0.73 |
|                            | putative lip  | 1.06 | 0.05 | 1 | 0.84 | 0.12 | 1   | 0.79 |
| rogenase                   |               | 0.08 | 0.02 | 1 | 1.24 | 0.07 | 1   | n/a  |
| aroE                       | shikimate c   | 0.97 | 0.14 | 1 | 1.17 | 0.26 | 1   | 1.27 |
| yceB                       | conserved     | 1.06 | 0.16 | 1 | 0.88 | 0.42 | 1   | 0.78 |
| feoB                       | ferrous iron  | 0.97 | 0.07 | 1 | 1.4  | 0.15 | 1   | 1.22 |
| ft; putative permease      |               | 0.06 | 0.03 | 1 | 1.22 | 0.13 | 1   | n/a  |
|                            | putative me   | 1.05 | 0.11 | 1 | 1.25 | 0.13 | 1   | 1.26 |
| ydeW                       | putative req  | 1.04 | 0.09 | 1 | 1.31 | 0.15 | 1   | 1.42 |
| able minor tail protein    |               | 0.24 | 0.12 | 1 | 1.01 | 0.37 | 1   | n/a  |
| ne protein                 |               | 0.1  | 0.01 | 1 | 1.37 | 0.19 | 1   | n/a  |
| dnaB                       | replicative l | 0.98 | 0.1  | 1 | 1.31 | 0.18 | 1   | 1.33 |
| gltP                       | proton glut   | 0.93 | 0.07 | 1 | 1.27 | 0.18 | 1   | 1.22 |
| ygbB                       | 2C-methyl-    | 0.99 | 0.1  | 1 | 1.09 | 0.24 | 1   | 1.13 |
|                            | putative me   | 1.11 | 0.14 | 1 | 0.99 | 0.13 | 1   | 0.85 |
|                            | conserved     | 0.98 | 0.12 | 1 | 0.91 | 0.13 | 1   | 0.96 |
|                            |               | 0.13 | 0.01 | 1 | 0.8  | 0.2  | 1   | n/a  |
| live host specificity prot |               | 0.09 | 0.02 | 1 | 0.9  | 0.18 | n/a | n/a  |
|                            | putative lip  | 1.04 | 0.03 | 1 | 0.98 | 0.19 | 1   | 1.02 |
| aceA                       | isocitrate ly | 0.98 | 0.08 | 1 | 1.23 | 0.07 | 1   | 1.31 |



|                            |               |      |      |   |      |      |   |      |
|----------------------------|---------------|------|------|---|------|------|---|------|
| ate component              |               | 0.1  | 0.03 | 1 | 1.22 | 0.22 | 1 | n/a  |
| nrfB                       | cytochrome    | 1.05 | 0.1  | 1 | 1.48 | 0.18 | 1 | 1.29 |
|                            | araC family   | 1.06 | 0.17 | 1 | 1.4  | 0.19 | 1 | 1.23 |
| yjeP                       | putative me   | 0.88 | 0.06 | 1 | 1.25 | 0.25 | 1 | 1.21 |
|                            | putative ac   | 0.97 | 0.08 | 1 | 1    | 0.09 | 1 | 0.92 |
|                            | conserved     | 0.91 | 0.14 | 1 | 1.04 | 0.26 | 1 | 0.95 |
| nlpB                       | putative lipi | 1.01 | 0.04 | 1 | 1.01 | 0.11 | 1 | 0.92 |
| sppA                       | protease IV   | 0.95 | 0.04 | 0 | 1    | 0.26 | 0 | 0.93 |
| bcdD                       | fimbrial sut  | 0.96 | 0.08 | 1 | 1.27 | 0.09 | 1 | 1.11 |
| yjfl                       | putative me   | 0.78 | 0.11 | 1 | 1.24 | 0.44 | 1 | 1.13 |
| ytfP                       | conserved     | 1.04 | 0.1  | 1 | 1.43 | 0.21 | 0 | 1.06 |
|                            | putative MF   | 1.07 | 0.11 | 1 | 0.95 | 0.08 | 1 | 0.84 |
| nuoK                       | NADH dehy     | 1.27 | 0.22 | 1 | 1.02 | 0.18 | 0 | 0.8  |
|                            | conserved     | 1.15 | 0.16 | 1 | 0.98 | 0.1  | 1 | 0.91 |
|                            | putative me   | 1.07 | 0.1  | 1 | 0.92 | 0.1  | 1 | 0.94 |
| pduX                       | conserved     | 1.02 | 0.11 | 1 | 0.97 | 0.42 | 1 | 0.88 |
| tdcD                       | propionate    | 0.88 | 0.12 | 1 | 1.09 | 0.11 | 1 | 1.25 |
| nbrial chaperone           |               | 0.1  | 0.02 | 1 | 1.06 | 0.19 | 1 | n/a  |
|                            | glucans bic   | 1.12 | 0.05 | 1 | 0.86 | 0.11 | 1 | 0.72 |
| subunit                    |               | 0.11 | 0.01 | 1 | 1.08 | 0.14 | 1 | n/a  |
| prpR                       | propionate    | 0.96 | 0.08 | 1 | 1.21 | 0.21 | 1 | 0.93 |
|                            | conserved     | 1    | 0.08 | 1 | 0.85 | 0.14 | 1 | 0.86 |
| ydhC                       | putative int  | 0.96 | 0.06 | 1 | 0.81 | 0.12 | 1 | 0.81 |
| sgaT                       | putative tra  | 0.93 | 0.07 | 1 | 1.18 | 0.21 | 1 | 1.08 |
| ne protein                 |               | 0.06 | 0.02 | 1 | 1.15 | 0.08 | 1 | n/a  |
| ubiX                       | putative de   | 0.88 | 0.05 | 1 | 0.98 | 0.17 | 1 | 0.87 |
| pheS                       | phenylalan    | 0.94 | 0.03 | 1 | 0.81 | 0.1  | 1 | 0.76 |
|                            | conserved     | 0.92 | 0.12 | 1 | 0.79 | 0.12 | 1 | 0.79 |
| prfC                       | peptide cha   | 0.92 | 0.07 | 1 | 1.25 | 0.45 | 1 | 1.19 |
|                            | putative AE   | 0.94 | 0.06 | 1 | 0.79 | 0.22 | 1 | 0.76 |
|                            | putative inr  | 1.05 | 0.1  | 1 | 1.33 | 0.24 | 1 | 1.11 |
| malk                       | maltose/m     | 0.99 | 0.08 | 1 | 1.32 | 0.27 | 1 | 1.18 |
| rbsA                       | high affinity | 1.06 | 0.12 | 1 | 1.42 | 0.13 | 1 | 1.4  |
| yaeD                       | conserved     | 1.06 | 0.11 | 1 | 1    | 0.16 | 1 | 0.92 |
| vsr                        | patch repai   | 0.98 | 0.12 | 1 | 0.94 | 0.19 | 1 | 0.75 |
| zur                        | zinc uptake   | 0.99 | 0.08 | 1 | 1.24 | 0.16 | 1 | 1.32 |
| astD                       | succinylglu   | 0.93 | 0.06 | 1 | 0.91 | 0.09 | 1 | 0.84 |
|                            | putative ex   | 1.05 | 0.09 | 1 | 0.94 | 0.24 | 1 | 0.71 |
| ydrogenase                 |               | 0.07 | 0.02 | 1 | 0.9  | 0.12 | 1 | n/a  |
|                            | putative Hly  | 1.01 | 0.04 | 1 | 0.94 | 0.1  | 1 | 0.81 |
| flgD                       | flagellar ho  | 1.09 | 0.04 | 1 | 0.91 | 0.08 | 1 | 0.76 |
| rfaA                       | TDP-glucos    | 0.94 | 0.08 | 1 | 1.01 | 0.28 | 1 | 0.86 |
| crl                        | curlin gene   | 1.03 | 0.04 | 1 | 1.12 | 0.11 | 1 | 1.05 |
|                            | putative me   | 1.13 | 0.1  | 1 | 1.2  | 0.08 | 1 | 1.23 |
|                            | putative tra  | 0.95 | 0.12 | 1 | 1.15 | 0.14 | 1 | 1.19 |
| yhjM                       | probable ei   | 0.9  | 0.06 | 1 | 1.31 | 0.13 | 1 | 1.2  |
|                            | conserved     | 1.06 | 0.11 | 1 | 1.19 | 0.15 | 1 | 1.22 |
| menC                       | O-succinylk   | 1.02 | 0.07 | 1 | 1.04 | 3.19 | 1 | 0.85 |
| glpC                       | anaerobic g   | 1.07 | 0.13 | 1 | 1.02 | 0.13 | 1 | 0.87 |
| bcp                        | bacterioferi  | 1.16 | 0.17 | 1 | 1.12 | 0.49 | 0 | 1.03 |
| ybbO                       | hypothetica   | 1.09 | 0.07 | 1 | 1.1  | 0.18 | 1 | 0.89 |
| ilar to minor tail protein |               | 0.54 | 0.06 | 1 | 1.02 | 0.13 | 1 | n/a  |

|                |                      |      |      |   |      |      |     |      |
|----------------|----------------------|------|------|---|------|------|-----|------|
|                |                      | 0.09 | 0.02 | 1 | 0.94 | 0.12 | 1   | n/a  |
| gltS           | glutamate p          | 0.92 | 0.07 | 1 | 1.32 | 0.13 | 1   | 1.21 |
| dppB           | dipeptide tr         | 1.04 | 0.08 | 1 | 1.32 | 0.11 | 1   | 1.16 |
| dppF           | dipeptide tr         | 0.86 | 0.07 | 1 | 1.37 | 0.28 | 1   | 1.28 |
|                | putative ox          | 0.91 | 0.09 | 1 | 1.28 | 0.23 | 1   | 1.47 |
| probable minor | tail protein         | 0.27 | 0.04 | 1 | 0.89 | 0.37 | 1   | n/a  |
|                | conserved            | 0.55 | 0.04 | 1 | 0.99 | 0.1  | n/a | 0.85 |
|                | conserved            | 0.95 | 0.04 | 1 | 1.21 | 0.1  | 1   | 1.16 |
| sopD           | possible se          | 0.83 | 0.07 | 1 | 1.14 | 0.19 | 1   | 1.17 |
| pyrB           | aspartate c          | 0.91 | 0.08 | 1 | 1.32 | 0.21 | 1   | 1.19 |
| metL           | bifunctiona          | 0.92 | 0.07 | 1 | 1.37 | 0.21 | 1   | 1.38 |
| kdpA           | potassium-           | 0.86 | 0.06 | 1 | 0.91 | 0.13 | 1   | 0.81 |
|                | conserved            | 1.04 | 0.04 | 1 | 0.94 | 0.15 | 1   | 0.78 |
| fimI           |                      | 0.96 | 0.1  | 1 | 0.94 | 0.17 | 1   | 0.87 |
| purL           | phosphorib           | 1.02 | 0.07 | 1 | 1.01 | 0.07 | 1   | 1.01 |
| rhaR           | L-rhamnos            | 1.01 | 0.08 | 1 | 1.31 | 0.2  | 1   | 1.27 |
|                | conserved            | 0.95 | 0.03 | 1 | 0.97 | 0.15 | n/a | 0.78 |
|                | hypothetica          | 0.85 | 0.07 | 1 | 1.01 | 0.23 | 1   | 0.94 |
| cadA           | lysine deca          | 0.93 | 0.13 | 1 | 0.93 | 0.22 | 1   | 0.97 |
| ompR           | two-compo            | 0.87 | 0.11 | 1 | 1.28 | 0.2  | 1   | 1.28 |
| sapD           | peptide tra          | 0.95 | 0.07 | 1 | 0.74 | 0.19 | 1   | 0.75 |
| leuD           | 3-isopropyl          | 0.86 | 0.05 | 1 | 1.11 | 0.24 | 1   | 1.06 |
| adh            | alcohol def          | 0.88 | 0.06 | 1 | 0.73 | 0.18 | 1   | 0.77 |
| spaN           | surface pre          | 0.86 | 0.08 | 1 | 1.01 | 0.24 | 1   | 1.18 |
| eutA           | putative etf         | 0.87 | 0.04 | 1 | 0.99 | 0.15 | 1   | 0.91 |
| yiiD           | putative ac          | 0.96 | 0.06 | 1 | 1.42 | 0.24 | 1   | 1.37 |
| ybeF           | lysR-family          | 0.94 | 0.09 | 1 | 1.06 | 0.19 | 1   | 0.84 |
| rsD            | putative req         | 0.93 | 0.07 | 1 | 1.28 | 0.34 | 1   | 1.33 |
| yihT           | putative alc         | 0.88 | 0.05 | 1 | 1.41 | 0.25 | 1   | 1.35 |
|                | hypothetica          | 1.05 | 0.07 | 1 | 1.31 | 0.32 | 1   | 1.27 |
| marB           | multiple an          | 0.98 | 0.1  | 1 | 0.74 | 0.14 | 1   | 0.73 |
| rpmF           | 50S riboso           | 0.98 | 0.13 | 1 | 0.87 | 0.39 | 1   | 0.79 |
| tpx            | thiol peroxi         | 0.98 | 0.12 | 1 | 0.77 | 0.36 | 1   | 0.78 |
| ppk            | polyphosph           | 0.86 | 0.1  | 1 | 0.91 | 0.31 | 1   | 1.05 |
|                | conserved            | 0.85 | 0.12 | 1 | 1.2  | 0.2  | 1   | 1.26 |
| waaB           | lipopolysac          | 0.86 | 0.12 | 1 | 1.25 | 0.18 | 1   | 1.32 |
|                | hypothetica          | 1.35 | 0.2  | 1 | 1.11 | 0.24 | 1   | 0.9  |
| thiG           | thiamine bi          | 0.81 | 0.03 | 1 | 1.39 | 0.17 | 1   | 1.26 |
|                | putative se          | 0.92 | 0.09 | 1 | 1.4  | 0.15 | 1   | 1.31 |
|                | hypothetica          | 0.75 | 0.18 | 0 | 0.97 | 0.21 | 0   | 0.84 |
| atpE           | ATP synthase         | 0.93 | 0.1  | 1 | 1.47 | 0.37 | 1   | 1.16 |
| pduF           | propanedic           | 0.95 | 0.05 | 1 | 0.9  | 0.16 | 1   | 0.83 |
|                | putative an          | 0.77 | 0.05 | 1 | 1.21 | 0.25 | 1   | 1.08 |
|                | conserved            | 0.89 | 0.06 | 1 | 0.82 | 0.16 | 1   | 0.79 |
| acnA           | aconitate h          | 0.91 | 0.09 | 1 | 0.75 | 0.15 | 1   | 0.71 |
| aroF           | phospho-2-           | 0.98 | 0.03 | 1 | 0.9  | 0.28 | 1   | 0.94 |
| ygcX           | probable gl          | 0.85 | 0.11 | 1 | 1.09 | 0.12 | 1   | 1.06 |
| phnT           | probable A           | 0.92 | 0.05 | 1 | 1.07 | 0.27 | 1   | 0.8  |
| rfaH           | transcriptio         | 0.83 | 0.09 | 1 | 1.51 | 0.4  | 1   | 1.28 |
| corA           | magnesium            | 1.3  | 0.14 | 1 | 1.3  | 0.24 | 1   | 1.17 |
|                | hydridyl transferase | 1.22 | 0.14 | 1 | 1.48 | 0.3  | 1   | 1.04 |
| edd            | 6-phospho            | 0.89 | 0.05 | 1 | 0.84 | 0.12 | 1   | 0.86 |

|                            |               |      |      |   |      |          |       |      |
|----------------------------|---------------|------|------|---|------|----------|-------|------|
| rep                        | ATP-deper     | 0.83 | 0.11 | 1 | 1.44 | 0.31     | 1     | 1.3  |
| yabK                       | putative AE   | 0.98 | 0.19 | 1 | 1.05 | 0.32     | 1     | 0.8  |
|                            | putative me   | 1    | 0.16 | 1 | 0.68 | 0.09     | 1     | 0.67 |
| hyaC                       | probable N    | 0.91 | 0.06 | 1 | 0.72 | 0.13     | 1     | 0.81 |
| thyA                       | thymidylate   | 1.01 | 0.12 | 1 | 1.17 | 0.15     | 1     | 1.05 |
| oppD                       | oligopeptid   | 1.02 | 0.05 | 1 | 0.74 | 0.17     | 1     | 0.68 |
|                            | putative ex   | 0.86 | 0.03 | 1 | 1.42 | 0.27     | 1     | 1.18 |
|                            | chloramph     | 0.84 | 0.05 | 1 | 1.37 | 0.28     | 1     | 1.17 |
|                            | conserved     | 0.92 | 0.05 | 1 | 1.36 | 0.23     | 1     | 1.27 |
| ilar to minor capsid prot  |               | 0.09 | 0.02 | 1 | 1.15 | 0.23     | 1 n/a |      |
|                            | conserved     | 1.04 | 0.09 | 1 | 0.78 | 0.05     | 1     | 0.82 |
| purU                       | formyltetral  | 0.88 | 0.06 | 1 | 0.88 | 0.13     | 1     | 0.76 |
|                            | putative alc  | 1    | 0.04 | 1 | 0.71 | 0.09     | 1     | 0.68 |
| prc                        | tail-specific | 0.85 | 0.09 | 1 | 0.75 | 0.15     | 1     | 0.8  |
| yebA                       | conserved     | 0.96 | 0.09 | 1 | 0.76 | 0.1      | 1     | 0.77 |
| ybbN                       | thioredoxin   | 0.98 | 0.08 | 1 | 1.03 | 0.11     | 1     | 0.94 |
| allC                       | allantoate a  | 0.97 | 0.07 | 1 | 1.05 | 0.2      | 1     | 0.93 |
|                            | conserved     | 0.92 | 0.05 | 1 | 1.04 | 0.1      | 1     | 0.86 |
| ybdF                       | conserved     | 1    | 0.22 | 1 | 0.9  | 0.16     | 1     | 0.85 |
| rnk                        | regulator of  | 1.12 | 0.06 | 1 | 0.92 | 0.06     | 1     | 0.9  |
| iation inhibitor           |               | 0.47 | 0.07 | 1 | 0.67 | 0.09     | 1 n/a |      |
|                            | hypothetica   | 0.95 | 0.14 | 1 | 0.78 | 0.07     | 1     | 0.74 |
|                            | putative rib  | 0.73 | 0.07 | 1 | 0.8  | 0.13     | 1     | 0.75 |
|                            | putative gly  | 0.92 | 0.06 | 1 | 0.75 | 0.12     | 1     | 0.76 |
|                            | putative mu   | 0.94 | 0.05 | 1 | 0.85 | 0.06 n/a |       | 0.74 |
|                            | putative ma   | 0.93 | 0.05 | 1 | 0.78 | 0.15     | 1     | 0.74 |
| ybaR                       | copper-trar   | 0.92 | 0.09 | 1 | 1.23 | 0.4      | 1     | 0.76 |
|                            | putative me   | 0.94 | 0.04 | 1 | 0.72 | 0.11     | 1     | 0.68 |
|                            | putative hy   | 0.9  | 0.08 | 1 | 0.67 | 0.11     | 1     | 0.67 |
| drogenase                  |               | 0.07 | 0.01 | 1 | 1.14 | 0.11     | 1 n/a |      |
|                            | conserved     | 0.9  | 0.04 | 1 | 1.07 | 0.19     | 1     | 0.88 |
|                            | putative me   | 1.02 | 0.06 | 1 | 1.32 | 0.13     | 1     | 1.06 |
|                            | hypothetica   | 0.88 | 0.08 | 1 | 1.28 | 0.24 n/a |       | 1.15 |
| yiaO                       |               | 1.16 | 0.1  | 1 | 1.27 | 0.11     | 1     | 1.16 |
| ttk                        | putative Te   | 0.89 | 0.05 | 1 | 1.35 | 0.26     | 1     | 1.37 |
|                            |               | 0.91 | 0.09 | 1 | 1.49 | 0.25     | 1     | 1.37 |
| fucK                       | L-fucose      | 0.86 | 0.1  | 1 | 1.22 | 0.14     | 1     | 1.15 |
| ar to late control gene ii |               | 1.01 | 0.09 | 1 | 1.11 | 0.09     | 1     | 1.12 |
| sbcD                       | exonucleas    | 0.9  | 0.07 | 1 | 1.01 | 0.21     | 1     | 0.87 |
|                            | hypothetica   | 0.94 | 0.06 | 1 | 1.18 | 0.15     | 1     | 1.21 |
|                            | putative ph   | 0.77 | 0.02 | 1 | 1.2  | 0.15     | 1     | 1.22 |
|                            | putative lac  | 0.98 | 0.04 | 1 | 1.39 | 0.26     | 1     | 1.13 |
|                            | hypothetica   | 0.94 | 0.08 | 1 | 1.51 | 0.22     | 1     | 1.44 |
|                            | large repeti  | 0.94 | 0.03 | 1 | 1.07 | 0.18     | 1     | 1.06 |
| citB                       | transcriptio  | 0.95 | 0.05 | 1 | 1.16 | 0.14 n/a |       | 1.03 |
| ispA                       | geranyltran   | 0.97 | 0.03 | 1 | 1.03 | 0.16     | 1     | 0.96 |
|                            |               | 0.95 | 0.07 | 1 | 1.29 | 0.22     | 1     | 1.2  |
|                            |               | 0.19 | 0.06 | 1 | 0.97 | 0.14     | 1 n/a |      |
| yehS                       | conserved     | 1.01 | 0.09 | 1 | 0.98 | 0.19     | 1     | 0.9  |
|                            | putative me   | 0.94 | 0.06 | 1 | 0.91 | 0.11     | 1     | 0.72 |
|                            | putative ex   | 0.92 | 0.08 | 1 | 1.38 | 0.29     | 1     | 1.24 |
| sugE                       | SugE prote    | 1.05 | 0.12 | 1 | 1.17 | 0.23     | 1     | 1.14 |

|                          |                |      |      |   |      |         |       |      |
|--------------------------|----------------|------|------|---|------|---------|-------|------|
| cybC                     | soluble cytr   | 0.95 | 0.08 | 1 | 1.12 | 0.21    | 1     | 1.11 |
| rpIW                     | 50S riboso     | 0.99 | 0.08 | 1 | 1.18 | 0.09    | 1     | 1.23 |
| yjeE                     | conserved      | 1.01 | 0.11 | 1 | 1.18 | 0.11    | 1     | 1.06 |
| rbfA                     | ribosome-t     | 0.54 | 0.04 | 1 | 1.16 | 0.47    | 1     | 1.2  |
| rfaE                     | ADP-hepto      | 1.08 | 0.08 | 1 | 1.13 | 0.15    | 1     | 1.11 |
| ordL                     | putative ox    | 0.98 | 0.1  | 1 | 1.16 | 0.1     | 1     | 1.21 |
|                          | putative gly   | 0.93 | 0.04 | 1 | 1.15 | 0.13    | 1     | 1.08 |
| slt                      | lytic mureir   | 0.94 | 0.04 | 1 | 1.24 | 0.22    | 1     | 1.01 |
| sbmA                     | probable A     | 1.07 | 0.02 | 1 | 0.94 | 0.24    | 1     | 0.77 |
| yeiR                     | conserved      | 1.01 | 0.02 | 1 | 0.87 | 0.2     | 1     | 0.89 |
| rfbG                     | CDP-gluco      | 1.01 | 0.13 | 1 | 0.9  | 0.11    | 1     | 0.88 |
| stcC                     | putative ou    | 1.03 | 0.06 | 1 | 0.97 | 0.07    | 1     | 0.87 |
| ftsI2                    | penicillin-bi  | 0.89 | 0.04 | 1 | 0.77 | 0.11    | 1     | 0.87 |
|                          |                | 1.06 | 0.07 | 1 | 1.2  | 0.1 n/a |       | 1.01 |
| iciA                     | chromoson      | 0.92 | 0.09 | 1 | 1.16 | 0.22    | 1     | 1.22 |
| ybgF                     | putative ex    | 0.89 | 0.08 | 1 | 0.97 | 0.11    | 1     | 0.85 |
| rhIE                     | putative AT    | 0.9  | 0.04 | 1 | 0.87 | 0.15    | 1     | 0.75 |
| dsbC                     | thiol:disulfic | 1.02 | 0.05 | 1 | 1.1  | 0.11    | 1     | 1.18 |
| flgG                     | flagellar ba   | 0.94 | 0.04 | 1 | 0.82 | 0.13    | 1     | 0.68 |
| ybhB                     | conserved      | 0.93 | 0.08 | 1 | 1.03 | 0.15    | 1     | 0.86 |
| ne protein               |                | 0.13 | 0.02 | 1 | 0.86 | 0.1     | 1 n/a |      |
|                          | possible ex    | 1.08 | 0.1  | 1 | 1.14 | 0.15    | 1     | 1.21 |
| mgtC                     | conserved      | 1.08 | 0.07 | 1 | 1.45 | 0.18    | 1     | 1.29 |
|                          | putative mε    | 1.07 | 0.12 | 1 | 1.16 | 0.17    | 1     | 1.12 |
| sirA                     | invasion re    | 1.04 | 0.08 | 1 | 0.78 | 0.09    | 1     | 0.77 |
| gltB                     | glutamate s    | 0.89 | 0.06 | 1 | 1.26 | 0.17    | 1     | 1.14 |
|                          | possible ca    | 1    | 0.05 | 1 | 1.16 | 0.17    | 1     | 1.33 |
| rpoD                     | RNA polym      | 0.89 | 0.04 | 1 | 1.23 | 0.19    | 1     | 1.27 |
| sscA                     | putative Ty    | 0.89 | 0.06 | 1 | 0.76 | 0.12    | 1     | 0.71 |
| tion of the O-antigen (L |                | 0.08 | 0.01 | 1 | 0.95 | 0.25    | 1 n/a |      |
| or, lysR family          |                | 0.12 | 0.01 | 1 | 1.02 | 0.08    | 1 n/a |      |
| cydA                     | cytochromeε    | 0.97 | 0.04 | 1 | 0.96 | 0.06    | 1     | 0.82 |
| prgl                     | pathogenic     | 0.93 | 0.09 | 1 | 1.08 | 0.14    | 1     | 1.08 |
| stpA                     | DNA-bindir     | 0.93 | 0.1  | 1 | 1.13 | 0.2     | 1     | 1.11 |
| rpmG                     | 50S riboso     | 0.92 | 0.07 | 1 | 1.48 | 0.25    | 1     | 1.43 |
| rpsP                     | 30S riboso     | 0.96 | 0.04 | 1 | 0.94 | 0.18    | 1     | 1.12 |
| ybcJ                     | conserved      | 0.97 | 0.06 | 1 | 1.06 | 0.1     | 1     | 0.82 |
|                          | putative tra   | 1    | 0.13 | 1 | 0.72 | 0.36    | 1     | 0.76 |
| rotein                   |                | 1.02 | 0.11 | 1 | 0.76 | 0.07    | 1 n/a |      |
| yedF                     | conserved      | 1.11 | 0.11 | 1 | 0.81 | 0.08    | 1     | 0.85 |
|                          | conserved      | 0.97 | 0.08 | 1 | 0.79 | 0.15    | 1     | 0.77 |
|                          | putative mε    | 0.93 | 0.13 | 1 | 1.45 | 0.07    | 1     | 1.13 |
| ppiC                     | peptidyl-prc   | 1.15 | 0.1  | 1 | 1.49 | 0.15    | 1     | 1.19 |
| himD                     | integration    | 1.02 | 0.07 | 1 | 0.87 | 0.16    | 1     | 0.83 |
| ne protein               |                | 0.2  | 0.01 | 1 | 1.11 | 0.17    | 1 n/a |      |
| yiaQ                     | putative he    | 0.93 | 0.08 | 1 | 1.4  | 0.18    | 1     | 1.26 |
| /dratase                 |                | 0.08 | 0.01 | 1 | 0.83 | 0.11    | 1 n/a |      |
|                          |                | 0.13 | 0.02 | 1 | 0.8  | 0.07    | 1 n/a |      |
| hifts                    |                | 0.7  | 0.05 | 1 | 1.32 | 0.14    | 1     | 1.02 |
| ecnB                     | entericidin    | 0.92 | 0.07 | 1 | 1.35 | 0.14    | 1     | 1.13 |
|                          | conserved      | 1.02 | 0.09 | 1 | 1.31 | 0.32    | 1     | 1    |
| thrL                     | thr operon     | 1.1  | 0.18 | 0 | 1.36 | 0.44    | 0     | 0.68 |

|                           |              |       |      |     |      |      |     |      |
|---------------------------|--------------|-------|------|-----|------|------|-----|------|
| rotein                    |              | 0.87  | 0.11 | 1   | 1.19 | 0.2  | 0   | n/a  |
| ide                       |              | 1.08  | 0.2  | 0   | 1.33 | 0.58 | 0   | n/a  |
| ne protein                |              | 0.54  | 0.06 | 0   | 0.89 | 0.32 | 0   | n/a  |
| glgS                      | glycogen s   | 0.97  | 0.1  | 1   | 1.22 | 0.11 | 1   | 1.19 |
| secG                      | protein-exp  | 0.95  | 0.03 | 1   | 1.1  | 0.12 | 1   | 1.13 |
| ybjC                      | putative me  | 1.05  | 0.1  | 1   | 0.9  | 0.07 | 1   | 0.77 |
| rotein                    |              | 0.63  | 0.05 | 1   | 0.83 | 0.07 | 1   | n/a  |
| ive excisionase           |              | 0.12  | 0.02 | 1   | 0.82 | 0.09 | 1   | n/a  |
|                           | UDP-galac    | 1     | 0.14 | 1   | 0.89 | 0.1  | 1   | 0.89 |
| rclease/phosphodiestera   |              | 0.05  | 0.02 | 1   | 0.8  | 0.12 | n/a | n/a  |
|                           |              | 0.11  | 0.02 | 1   | 0.65 | 0.12 | n/a | n/a  |
| rotein                    |              | 0.05  | 0    | 1   | 0.76 | 0.1  | n/a | n/a  |
| urface exclusion          |              | 0.05  | 0.02 | 1   | 0.79 | 0.14 | n/a | n/a  |
| ssembly                   |              | 0.04  | 0.01 | 1   | 0.7  | 0.12 | n/a | n/a  |
| utative bacterial regulat |              | 0.07  | 0.01 | 1   | 0.66 | 0.11 | n/a | n/a  |
|                           |              | 0.91  | 0.03 | 1   | 0.79 | 0.09 | n/a | 0.74 |
| riT nicking-unwinding     |              | 0.05  | 0.02 | 1   | 0.79 | 0.13 | n/a | n/a  |
|                           | possible su  | 0.88  | 0.08 | 1   | 1.11 | 0.15 | 1   | 0.97 |
|                           |              | 0.9   | 0.05 | 1   | 0.91 | 0.12 | n/a | 0.84 |
|                           |              | 0.98  | 0.06 | 1   | 0.83 | 0.12 | n/a | 0.82 |
|                           |              | 1     | 0.06 | 1   | 0.93 | 0.1  | n/a | 0.91 |
|                           |              | 1.06  | 0.07 | 1   | 0.9  | 0.1  | n/a | 0.6  |
|                           |              | 0.98  | 0.04 | 1   | 1.29 | 0.12 | n/a | 1.14 |
|                           |              | 0.95  | 0.06 | 1   | 1.15 | 0.13 | n/a | 1.07 |
|                           |              | 0.98  | 0.08 | 1   | 1.22 | 0.12 | n/a | 1.1  |
|                           |              | 0.09  | 0.03 | 1   | 0.89 | 0.08 | n/a | n/a  |
|                           | n/a          | n/a   | n/a  | n/a | n/a  | n/a  | n/a | n/a  |
|                           | hypothetica  | 1.64  | 0.71 | 0   | n/a  | n/a  | n/a | 1.28 |
|                           | hypothetica  | 13.78 | 2.29 | 1   | n/a  | n/a  | n/a | 0.92 |
| rfbS                      | paratose sy  | 4.81  | 1.02 | 1   | n/a  | n/a  | n/a | 0.94 |
|                           | putative ph  | 3.22  | 0.22 | 1   | n/a  | n/a  | n/a | 1.01 |
| ygbF                      | conserved    | 4.65  | 1.14 | 1   | n/a  | n/a  | n/a | 1.1  |
| staA                      | putative fir | 8.16  | 1.12 | 1   | n/a  | n/a  | n/a | 0.76 |
|                           | hypothetica  | 14.04 | 5.57 | 1   | n/a  | n/a  | n/a | 0.98 |
|                           | conserved    | 3.32  | 0.27 | 1   | n/a  | n/a  | n/a | 1.21 |
|                           | probable pl  | 1.71  | 0.1  | 1   | 1.05 | 0.21 | n/a | 0.97 |
|                           | probable m   | 4.41  | 0.28 | 1   | n/a  | n/a  | n/a | 0.99 |
| staG                      | putative fir | 8.99  | 1.12 | 1   | n/a  | n/a  | n/a | 0.87 |
|                           | probable se  | 1.15  | 0.5  | 1   | n/a  | n/a  | n/a | 0.79 |
|                           | hypothetica  | 2.98  | 0.22 | 1   | n/a  | n/a  | n/a | 1.26 |
| nucD                      | putative lys | 3.68  | 0.26 | 1   | n/a  | n/a  | n/a | 1.12 |
| tnpA                      | transposas   | 1.52  | 0.83 | 1   | 1.01 | 0.08 | n/a | 0.75 |
|                           | hypothetica  | 3.43  | 1.06 | 1   | n/a  | n/a  | n/a | 1.4  |
|                           | hypothetica  | 7.69  | 1.77 | 1   | n/a  | n/a  | n/a | 0.65 |
|                           | hypothetica  | 9.24  | 0.81 | 1   | n/a  | n/a  | n/a | 0.69 |
|                           | hypothetica  | 4.25  | 1.21 | 1   | n/a  | n/a  | n/a | 0.94 |
|                           | putative ex  | 0.99  | 0.04 | 1   | 1.06 | 0.12 | n/a | 0.99 |
|                           |              | 1.15  | 0.14 | 1   | 1.34 | 0.26 | n/a | 1.23 |
|                           |              | 1.26  | 0.09 | 1   | 1.22 | 0.17 | n/a | 1.13 |
|                           | conserved    | 2.54  | 0.21 | 1   | n/a  | n/a  | n/a | 1    |
|                           | integrase    | 7.47  | 0.66 | 1   | n/a  | n/a  | n/a | 0.98 |
| pilU                      | prepilin pe  | 17.44 | 3.32 | 1   | n/a  | n/a  | n/a | 0.89 |

|                            |              |       |      |     |      |      |     |      |
|----------------------------|--------------|-------|------|-----|------|------|-----|------|
|                            | hypothetica  | 17.82 | 4.28 | 1   | n/a  | n/a  | n/a | 0.98 |
|                            | DEAD-box     | 22.79 | 3.26 | 1   | n/a  | n/a  | n/a | 1.09 |
|                            | putative me  | 4.05  | 0.31 | 1   | n/a  | n/a  | n/a | 1.01 |
|                            | hypothetica  | 3.87  | 0.35 | 1   | n/a  | n/a  | n/a | 1.2  |
|                            | hypothetica  | 22.19 | 2.91 | 1   | n/a  | n/a  | n/a | 1    |
|                            | n/a          | n/a   | n/a  | n/a | n/a  | n/a  | n/a | n/a  |
|                            | n/a          | n/a   | n/a  | n/a | n/a  | n/a  | n/a | n/a  |
|                            | n/a          | n/a   | n/a  | n/a | n/a  | n/a  | n/a | n/a  |
|                            | n/a          | n/a   | n/a  | n/a | n/a  | n/a  | n/a | n/a  |
|                            | n/a          | n/a   | n/a  | n/a | n/a  | n/a  | n/a | n/a  |
|                            | n/a          | n/a   | n/a  | n/a | n/a  | n/a  | n/a | n/a  |
| kdpD                       | sensor prot  | 0.95  | 0.06 | 1   | 0.92 | 0.12 | 1   | 0.91 |
|                            | possible ra  | 0.89  | 0.08 | 1   | 1.37 | 0.17 | 1   | 1.55 |
| pstC                       | phosphate    | 1.01  | 0.12 | 1   | 1.45 | 0.16 | 1   | 1.32 |
|                            | hypothetica  | 1.07  | 0.11 | 1   | 1.38 | 0.08 | 1   | 1.41 |
| hemM                       | outer mem    | 0.98  | 0.08 | 1   | 0.86 | 0.22 | 1   | 0.89 |
| leuC                       | 3-isopropyl  | 0.95  | 0.05 | 1   | 1.04 | 0.24 | 1   | 1.13 |
|                            | putative tra | 1.05  | 0.08 | 1   | 1.04 | 0.13 | 1   | 1.19 |
| yabB                       | conserved    | 1.14  | 0.1  | 1   | 1.01 | 0.25 | 1   | 1.05 |
| aroP                       | aromatic ar  | 0.98  | 0.13 | 1   | 1.17 | 0.21 | 1   | 1    |
| irone                      |              | 0.15  | 0.04 | 1   | 1    | 0.15 | 1   | n/a  |
| ine protein                |              | 0.2   | 0.04 | 1   | 1.05 | 0.25 | 1   | n/a  |
| yaeP                       | conserved    | 1.12  | 0.15 | 1   | 1.15 | 0.29 | 0   | 0.94 |
|                            | putative AT  | 1.03  | 0.12 | 1   | 1.09 | 0.03 | 1   | 1.43 |
|                            | conserved    | 1.07  | 0.14 | 1   | 1.03 | 0.11 | 1   | 1.1  |
| rlpB                       | rare lipoprc | 1.02  | 0.16 | 1   | 0.94 | 0.15 | 1   | 1.04 |
| yleB                       | putative mc  | 1.03  | 0.12 | 1   | 0.79 | 0.19 | 1   | 0.84 |
| potE                       | putrescine-  | 0.94  | 0.11 | 1   | 0.94 | 0.18 | 1   | 0.82 |
| fliT                       | flagellar pr | 1.07  | 0.08 | 1   | 0.86 | 0.16 | 1   | 0.84 |
|                            | conserved    | 1     | 0.11 | 1   | 0.68 | 0.06 | 1   | 0.89 |
| wcaA                       |              | 0.95  | 0.12 | 1   | 0.88 | 0.2  | 1   | 0.94 |
|                            | putative ca  | 1.3   | 0.12 | 1   | 1.07 | 0.13 | 1   | 1.25 |
| glucitol/sorbitol-specific |              | 0.08  | 0.02 | 1   | 1.01 | 0.13 | 1   | n/a  |
| rotein                     |              | 0.21  | 0.06 | 1   | 1.09 | 0.25 | 1   | n/a  |
| gabT                       | 4-aminobul   | 0.98  | 0.05 | 1   | 1.08 | 0.19 | 1   | 1.21 |
|                            | putative se  | 0.93  | 0.09 | 1   | 1.16 | 0.18 | 1   | 1.09 |
| n A subunit                |              | 0.45  | 0.12 | 1   | 1.11 | 0.27 | 1   | n/a  |
|                            |              | 0.08  | 0.02 | 1   | 0.99 | 0.09 | 1   | n/a  |
| pepN                       | aminopepti   | 1.09  | 0.07 | 1   | 0.85 | 0.2  | 1   | 0.83 |
|                            | conserved    | 1.17  | 0.16 | 1   | 0.85 | 0.15 | 1   | 0.72 |
| yheO                       | conserved    | 1.02  | 0.19 | 1   | 1.19 | 0.33 | 1   | 1.44 |
|                            | conserved    | 1     | 0.15 | 1   | 0.88 | 0.19 | 1   | 0.85 |
|                            | putative me  | 1.02  | 0.1  | 1   | 0.76 | 0.09 | 1   | 0.77 |
| rpIO                       | 50S ribosoi  | 1.11  | 0.14 | 1   | 1.05 | 0.14 | 1   | 1.37 |
| yhfK                       |              | 0.99  | 0.11 | 1   | 1.1  | 0.09 | 1   | 1.38 |
| pckA                       | phosphoen    | 1.14  | 0.2  | 1   | 1.13 | 0.2  | 1   | 1.38 |
|                            | putative re  | 0.91  | 0.16 | 1   | 0.85 | 0.31 | 1   | 1.04 |
|                            | putative me  | 1.06  | 0.12 | 1   | 0.8  | 0.51 | 1   | 0.77 |
|                            | putative se  | 1     | 0.08 | 1   | 0.82 | 0.11 | 1   | 0.78 |
|                            | ABC transp   | 0.96  | 0.08 | 1   | 0.81 | 0.16 | 1   | 0.8  |
| gntK                       | putative glu | 0.97  | 0.11 | 1   | 1.2  | 0.15 | 1   | 1.24 |
|                            |              | 0.09  | 0.02 | 1   | 0.82 | 0.21 | 1   | n/a  |

|                        |               |      |      |   |      |      |     |      |
|------------------------|---------------|------|------|---|------|------|-----|------|
| ate protein            |               | 0.07 | 0.03 | 1 | 1.32 | 0.07 | 1   | n/a  |
|                        | hypothetica   | 1.01 | 0.09 | 1 | 1.35 | 0.14 | 1   | 1.33 |
| menA                   | menaquino     | 1.05 | 0.09 | 1 | 1.33 | 0.17 | 1   | 1.2  |
| trmA                   | tRNA (urac    | 1.01 | 0.11 | 1 | 1.1  | 0.16 | 1   | 1.33 |
|                        | possible se   | 1.11 | 0.12 | 1 | 1.03 | 0.09 | 1   | 1.27 |
| ecnR                   | transcriptio  | 0.95 | 0.13 | 1 | 1.05 | 0.16 | 1   | 1.33 |
| fadL                   | long-chain    | 1.04 | 0.06 | 1 | 1.02 | 0.24 | 1   | 1.06 |
| artP                   | arginine tra  | 1    | 0.17 | 1 | 1.03 | 0.27 | 1   | 0.82 |
| maeB                   | NADP-dep      | 1.04 | 0.13 | 1 | 0.97 | 0.18 | 1   | 1.01 |
|                        | putative ex   | 0.95 | 0.15 | 1 | 0.88 | 0.11 | 1   | 1.03 |
|                        |               | 1.04 | 0.12 | 1 | 0.87 | 0.09 | 1   | 0.9  |
|                        | putative me   | 1    | 0.19 | 1 | 1.3  | 0.22 | 1   | 1.18 |
|                        |               | 1.03 | 0.16 | 1 | 1.21 | 0.13 | 1   | 1.37 |
| rotein                 |               | 0.8  | 0.15 | 0 | 1.51 | 0.72 | 0   | n/a  |
| pcm                    | L-isoaspart   | 1.01 | 0.15 | 1 | 1.13 | 0.13 | 1   | 1.18 |
| pyrG                   | CTP synth     | 1.02 | 0.09 | 1 | 1.15 | 0.09 | 1   | 1.2  |
|                        |               | 0.28 | 0.19 | 1 | 1.13 | 0.37 | 0   | n/a  |
|                        |               | 0.07 | 0.03 | 1 | 0.83 | 0.19 | n/a | n/a  |
| (se)                   |               | 0.11 | 0.03 | 1 | 0.81 | 0.11 | 1   | n/a  |
| nadE                   | NH3-deper     | 1.06 | 0.06 | 1 | 0.79 | 0.09 | 1   | 0.83 |
|                        | putative Te   | 1.2  | 0.13 | 1 | 0.72 | 0.12 | 1   | 0.8  |
| yodD                   | conserved     | 0.98 | 0.15 | 0 | 1.08 | 0.41 | 0   | 0.77 |
| A-binding domain-conti |               | 0.07 | 0.02 | 1 | 1.17 | 0.23 | 1   | n/a  |
| glpB                   | anaerobic (   | 1    | 0.12 | 1 | 1.04 | 0.22 | 1   | 0.91 |
|                        | conserved     | 0.91 | 0.1  | 1 | 1.2  | 0.2  | 1   | 1.3  |
| rotein                 |               | 0.11 | 0.02 | 1 | 1.09 | 0.17 | 1   | n/a  |
| ne protein             |               | 0.93 | 0.21 | 1 | 0.99 | 0.12 | 1   | 1.2  |
|                        | conserved     | 1.06 | 0.1  | 1 | 0.85 | 0.15 | 1   | 0.78 |
|                        | putative nit  | 1.07 | 0.09 | 1 | 0.71 | 0.12 | 1   | 0.83 |
|                        | conserved     | 1.06 | 0.12 | 1 | 0.71 | 0.1  | 1   | 0.73 |
| tus                    | DNA replic    | 1.05 | 0.23 | 1 | 0.82 | 0.25 | 1   | 0.77 |
|                        | putative me   | 1.02 | 0.11 | 1 | 0.84 | 0.21 | 1   | 0.74 |
| yceE                   | putative me   | 1.03 | 0.09 | 1 | 0.82 | 0.06 | 1   | 0.75 |
| sitD                   | Iron transp   | 0.97 | 0.04 | 1 | 1.09 | 0.57 | 1   | 1.2  |
| nth                    | endonuclea    | 1.16 | 0.11 | 1 | 0.69 | 0.14 | 1   | 0.75 |
| yedA                   | putative me   | 1.02 | 0.06 | 1 | 0.8  | 0.09 | 1   | 0.92 |
| hisB                   | imidazolegl   | 1.06 | 0.07 | 1 | 0.86 | 0.05 | 1   | 0.99 |
| topB                   | DNA topois    | 1.01 | 0.11 | 1 | 0.85 | 0.16 | 1   | 0.78 |
| slyA                   | transcriptio  | 1.1  | 0.19 | 1 | 0.81 | 0.32 | 1   | 0.88 |
| ydhD                   | conserved     | 1.03 | 0.18 | 1 | 0.94 | 0.25 | 1   | 0.93 |
|                        | conserved     | 1.07 | 0.16 | 1 | 0.72 | 0.1  | 1   | 0.74 |
| ssaN                   | putative typ  | 1.08 | 0.23 | 1 | 0.67 | 0.02 | 1   | 0.75 |
| mioC                   | MioC prote    | 1.11 | 0.24 | 1 | 1.32 | 0.1  | 1   | 1.46 |
|                        | putative PT   | 1.09 | 0.27 | 1 | 1.35 | 0.24 | 1   | 1.34 |
| pdxJ                   | putative py   | 1.02 | 0.11 | 1 | 1.03 | 0.19 | 1   | 1.11 |
| phoR                   | phosphate     | 1.04 | 0.13 | 1 | 0.91 | 0.11 | 1   | 0.93 |
| aceB                   | malate syn    | 0.97 | 0.2  | 1 | 1.09 | 0.63 | 1   | 1.3  |
| caiE                   | carnitine o   | 1.14 | 0.11 | 1 | 1.08 | 0.24 | 1   | 1.08 |
|                        | putative hy   | 0.95 | 0.08 | 1 | 0.85 | 0.2  | 1   | 0.83 |
|                        |               | 1.07 | 0.14 | 1 | 0.81 | 0.1  | 1   | 0.86 |
| fliR                   | flagellar bic | 1.01 | 0.07 | 1 | 0.85 | 0.15 | 1   | 0.85 |
|                        | putative ox   | 1.07 | 0.09 | 1 | 0.79 | 0.08 | 1   | 0.73 |

|                          |              |      |      |   |      |      |     |      |
|--------------------------|--------------|------|------|---|------|------|-----|------|
|                          | putative de  | 1.17 | 0.04 | 1 | 0.73 | 0.09 | 1   | 0.69 |
| div                      | Div protein  | 1.06 | 0.08 | 1 | 0.96 | 0.15 | 1   | 0.92 |
|                          | putative ox  | 1.04 | 0.12 | 1 | 0.97 | 0.11 | 1   | 1.07 |
| ilar to antiterminator Q |              | 0.13 | 0.04 | 1 | 0.94 | 0.06 | 1   | n/a  |
|                          | conserved    | 1.03 | 0.09 | 1 | 1.19 | 0.11 | 1   | 1.47 |
| ftsE                     | cell divisor | 1.09 | 0.11 | 1 | 1.18 | 0.1  | 1   | 1.27 |
| gph                      | phosphogly   | 0.97 | 0.13 | 1 | 1.21 | 0.23 | 1   | 1.24 |
|                          | possible ou  | 0.98 | 0.1  | 1 | 1.16 | 0.56 | 1   | 1.04 |
|                          |              | 1.01 | 0.16 | 1 | 0.76 | 0.21 | 1   | 0.87 |
|                          | conserved    | 1.14 | 0.16 | 1 | 0.94 | 0.17 | 1   | 0.94 |
| gtrA                     | bactoprenc   | 1.27 | 0.25 | 1 | 1.13 | 0.17 | 1   | 0.81 |
| ppa                      | inorganic p  | 0.95 | 0.15 | 1 | 1.16 | 0.23 | 1   | 1.19 |
| cstA                     | probable c   | 1.01 | 0.1  | 1 | 1.04 | 0.1  | 1   | 1.07 |
|                          | conserved    | 0.97 | 0.14 | 1 | 1.12 | 0.19 | 1   | 1.15 |
|                          |              | 0.96 | 0.13 | 1 | 1.17 | 0.06 | 1   | 1.23 |
|                          | conserved    | 0.95 | 0.07 | 1 | 1.41 | 0.25 | 1   | 1.17 |
| yrfC                     | putative m   | 0.94 | 0.09 | 1 | 1.27 | 0.12 | 1   | 1.2  |
| pta                      | phosphate    | 0.99 | 0.07 | 1 | 0.94 | 0.09 | 1   | 0.99 |
| csiE                     | stationary p | 1.03 | 0.11 | 1 | 1.06 | 0.04 | 1   | 0.98 |
| fdrA                     | FdrA protei  | 0.94 | 0.04 | 1 | 0.99 | 0.1  | 1   | 0.88 |
| allD                     | ureidoglycc  | 0.96 | 0.1  | 1 | 1.01 | 0.15 | 1   | 0.95 |
| mutS                     | DNA mism     | 0.97 | 0.08 | 1 | 1.04 | 0.19 | 1   | 1.12 |
| cpxP                     | extracytopl  | 1.03 | 0.09 | 1 | 1.37 | 0.07 | 1   | 1.35 |
| gltK                     | glutamate/   | 0.99 | 0.07 | 1 | 1.06 | 0.09 | 1   | 0.82 |
| fms                      | polypeptide  | 0.99 | 0.09 | 1 | 1.11 | 0.09 | 1   | 1.28 |
| lepB                     | signal pept  | 1.02 | 0.08 | 1 | 1.04 | 0.09 | 1   | 1.26 |
| hisI                     | phosphorib   | 1.07 | 0.08 | 1 | 0.9  | 0.08 | 1   | 0.89 |
| typA                     | GTP-bindir   | 1    | 0.1  | 1 | 1.26 | 0.15 | 1   | 1.41 |
| potH                     | putrescine   | 0.97 | 0.12 | 1 | 0.93 | 0.11 | 1   | 0.9  |
| mscL                     | large-condi  | 1    | 0.11 | 1 | 1.12 | 0.17 | 1   | 1.29 |
| of flagellar             | gene expre   | 0.27 | 0.06 | 1 | 1.17 | 0.3  | 0   | n/a  |
| flgL                     | flagellar ho | 1.11 | 0.18 | 1 | 0.69 | 0.11 | 1   | 0.76 |
| era                      | GTP-bindir   | 0.92 | 0.1  | 1 | 1.02 | 0.08 | 1   | 1.17 |
| dctA                     | C4-dicarbo   | 1.04 | 0.08 | 1 | 1.28 | 0.27 | 1   | 1.3  |
| glyA                     | serine hydr  | 0.98 | 0.03 | 1 | 0.98 | 0.08 | 1   | 1.01 |
| putA                     | proline deh  | 1.03 | 0.1  | 1 | 0.83 | 0.13 | n/a | 0.79 |
| manA                     | mannose-6    | 0.96 | 0.09 | 1 | 0.69 | 0.06 | 1   | 0.76 |
|                          | conserved    | 1    | 0.08 | 1 | 0.95 | 0.08 | 1   | 0.84 |
| ybiR                     | putative m   | 1.04 | 0.09 | 1 | 0.89 | 0.07 | 1   | 0.79 |
|                          | hypothetica  | 0.94 | 0.19 | 0 | 1.03 | 0.56 | 0   | 0.82 |
|                          | hypothetica  | 1.14 | 0.09 | 1 | 1.17 | 0.34 | 0   | 0.99 |
|                          | conserved    | 1.12 | 0.15 | 1 | 0.93 | 0.15 | 1   | 0.95 |
| dcuS                     | two-compo    | 0.96 | 0.09 | 1 | 1.14 | 0.31 | 1   | 1.25 |
| yecA                     | conserved    | 1.12 | 0.16 | 1 | 0.81 | 0.11 | 1   | 0.89 |
| mppA                     | periplasmic  | 0.98 | 0.13 | 1 | 0.79 | 0.18 | 1   | 0.77 |
| pspC                     | phage shor   | 1.02 | 0.13 | 1 | 0.69 | 0.09 | 1   | 0.79 |
|                          | putative typ | 0.87 | 0.17 | 1 | 1.06 | 0.13 | 1   | 1.34 |
| fkpB                     | probable Fl  | 0.91 | 0.12 | 1 | 1.02 | 0.1  | 1   | 1.06 |
|                          | putative lip | 0.94 | 0.11 | 1 | 0.72 | 0.07 | 1   | 0.76 |
|                          | conserved    | 1.05 | 0.32 | 0 | 1.34 | 0.43 | 0   | 0.82 |
| yihQ                     | putative gly | 1.01 | 0.16 | 1 | 1.38 | 0.22 | 1   | 1.48 |
| livJ                     |              | 0.97 | 0.06 | 1 | 1.29 | 0.26 | 1   | 1.2  |



|                            |               |      |      |   |      |      |     |      |
|----------------------------|---------------|------|------|---|------|------|-----|------|
|                            | hypothetica   | 0.92 | 0.08 | 0 | 1.23 | 0.19 | 0   | 0.89 |
|                            |               | 0.85 | 0.06 | 1 | 1.02 | 0.06 | n/a | 0.72 |
| ptsJ                       | putative tra  | 0.88 | 0.08 | 1 | 1.05 | 0.13 | 1   | 0.95 |
| yecE                       | conserved     | 0.95 | 0.1  | 1 | 0.79 | 0.06 | 1   | 0.91 |
|                            | putative typ  | 0.93 | 0.09 | 1 | 1.22 | 0.15 | 1   | 1.26 |
| yqeF                       | probable ar   | 0.98 | 0.1  | 1 | 1.16 | 0.18 | 1   | 1.09 |
| rpsU                       | 30S riboso    | 0.97 | 0.11 | 1 | 1.23 | 0.14 | 1   | 1.25 |
| iagB                       | cell invasio  | 1.01 | 0.08 | 1 | 1.05 | 0.2  | 1   | 1.18 |
| udp                        | uridine pho   | 1.02 | 0.14 | 1 | 1.27 | 0.2  | 1   | 1.29 |
| dnaA                       | chromosom     | 0.96 | 0.1  | 1 | 1.36 | 0.26 | 1   | 1.51 |
| rpiA                       | ribose 5-ph   | 1.07 | 0.15 | 1 | 1.05 | 0.11 | 1   | 1.16 |
| rffM                       | probable U    | 0.92 | 0.08 | 1 | 1.36 | 0.19 | 1   | 1.25 |
|                            | conserved     | 0.98 | 0.11 | 1 | 1.07 | 0.12 | 1   | 1.3  |
| rplL                       | 50S riboso    | 1.01 | 0.12 | 1 | 1.38 | 0.25 | 1   | 1.6  |
| fimA                       | type-1 fimb   | 0.81 | 0.14 | 1 | 0.93 | 0.14 | 1   | 0.85 |
| cheY                       | chemotaxis    | 0.93 | 0.15 | 1 | 0.74 | 0.12 | 1   | 0.82 |
| hemN                       | oxygen-ind    | 0.94 | 0.17 | 1 | 1.41 | 0.21 | 1   | 1.44 |
| lysR                       | transcriptio  | 0.92 | 0.09 | 1 | 1.07 | 0.1  | 1   | 1.17 |
|                            | hypothetica   | 0.9  | 0.04 | 1 | 1.45 | 0.31 | 1   | 1.42 |
| dapF                       | diaminopirr   | 0.99 | 0.07 | 1 | 1.31 | 0.2  | 1   | 1.26 |
| yifB                       |               | 1.04 | 0.1  | 1 | 1.39 | 0.08 | 1   | 1.14 |
| flagellin, filament struct |               | 0.49 | 0.05 | 1 | 0.9  | 0.12 | n/a | 0.82 |
| cysH                       | 3'-phospho    | 0.84 | 0.07 | 1 | 0.98 | 0.17 | 1   | 1.19 |
| adhP                       | alcohol def   | 0.92 | 0.12 | 1 | 0.71 | 0.08 | 1   | 0.79 |
|                            | putative tra  | 0.99 | 0.07 | 1 | 0.7  | 0.07 | 1   | 0.85 |
|                            | putative ex   | 1.01 | 0.1  | 1 | 0.74 | 0.1  | 1   | 0.75 |
|                            | putative tra  | 1.08 | 0.09 | 1 | 0.67 | 2.05 | 1   | 0.86 |
|                            | putative alc  | 1.03 | 0.11 | 1 | 0.71 | 0.06 | 1   | 0.75 |
|                            | putative req  | 1.01 | 0.11 | 1 | 0.75 | 0.08 | 1   | 0.81 |
| asnS                       | asparaginy    | 0.99 | 0.14 | 1 | 0.83 | 0.07 | 1   | 0.85 |
| fepC                       | ferric enter  | 0.93 | 0.1  | 1 | 0.97 | 0.08 | 1   | 0.91 |
| stbB                       | fimbrial cha  | 0.99 | 0.11 | 1 | 0.91 | 0.11 | 1   | 0.99 |
|                            | possible m    | 1.05 | 0.12 | 1 | 0.77 | 0.59 | 1   | 0.72 |
|                            | putative NA   | 0.97 | 0.17 | 1 | 0.71 | 0.06 | 1   | 0.78 |
| rrmA                       | rRNA guan     | 1.01 | 0.1  | 1 | 0.78 | 0.2  | 1   | 0.84 |
| ductase                    |               | 0.18 | 0.03 | 1 | 0.76 | 0.11 | 1   | n/a  |
| eda                        |               | 1.11 | 0.09 | 1 | 0.83 | 0.15 | 1   | 0.75 |
| yecI                       | ferritin-like | 0.97 | 0.03 | 1 | 0.86 | 0.14 | 1   | 0.95 |
| allA                       |               | 1.06 | 0.16 | 1 | 0.95 | 0.12 | 1   | 0.86 |
| cysS                       | cysteinyl-tF  | 0.98 | 0.07 | 1 | 0.92 | 0.13 | 1   | 0.85 |
| r isomerases               |               | 0.12 | 0.02 | 1 | 0.94 | 0.1  | 1   | n/a  |
| yajF                       | hypothetica   | 1.01 | 0.09 | 1 | 1.04 | 0.16 | 1   | 0.89 |
| hyb0                       | hydrogena     | 1.06 | 0.13 | 1 | 1.12 | 0.11 | 1   | 1.25 |
| mltB                       | membrane      | 1    | 0.1  | 1 | 1.01 | 0.12 | 1   | 1.07 |
|                            | hypothetica   | 1.05 | 0.12 | 1 | 1.27 | 0.08 | 1   | 1.3  |
|                            | conserved     | 0.93 | 0.1  | 1 | 1.07 | 0.23 | 1   | 1.22 |
| pgtE                       | outer mem     | 1.08 | 0.15 | 1 | 0.88 | 0.09 | 1   | 0.91 |
| yicL                       | putative me   | 1.01 | 0.06 | 1 | 1.27 | 0.13 | 1   | 1.22 |
| argA                       | N-acetylglu   | 0.92 | 0.09 | 1 | 1.06 | 0.06 | 1   | 1.25 |
|                            | hypothetica   | 0.96 | 0.19 | 1 | 1.05 | 0.19 | 1   | 1.22 |
|                            | conserved     | 1.01 | 0.16 | 1 | 1.08 | 0.07 | 1   | 1.16 |
| tesB                       | acyl-CoA th   | 1.06 | 0.15 | 1 | 1.04 | 0.11 | 1   | 0.92 |

|                 |               |      |      |   |      |      |   |      |
|-----------------|---------------|------|------|---|------|------|---|------|
|                 |               | 0.94 | 0.07 | 1 | 1.01 | 0.16 | 1 | 1.02 |
| coaD            | phosphopa     | 0.87 | 0.04 | 1 | 1.39 | 0.25 | 1 | 1.25 |
| exo             | 5'-3' exonu   | 0.97 | 0.06 | 1 | 1.14 | 0.11 | 1 | 1.15 |
| kduL            | 5-keto-4-de   | 1.05 | 0.06 | 1 | 1.19 | 0.14 | 1 | 1.18 |
| ite             | dehydrogenase | 0.08 | 0.01 | 1 | 1.14 | 0.06 | 1 | n/a  |
|                 | hypothetica   | 0.95 | 0.12 | 1 | 1.2  | 0.1  | 1 | 1.29 |
| recA            | RecA prote    | 0.99 | 0.07 | 1 | 1.09 | 0.16 | 1 | 1.09 |
| wzb             | putative pr   | 1.05 | 0.22 | 1 | 0.87 | 0.54 | 1 | 1.03 |
| in of phage     |               | 0.74 | 0.05 | 1 | 0.83 | 0.07 | 1 | 0.86 |
| waaC            | lipopolysac   | 1.04 | 0.05 | 1 | 1.31 | 0.61 | 1 | 1.35 |
| rpsS            | 30S ribosom   | 1    | 0.06 | 0 | 1.2  | 0.28 | 0 | 1.23 |
|                 | conserved     | 0.99 | 0.15 | 1 | 1.06 | 0.08 | 1 | 1.19 |
|                 | possible ca   | 1.04 | 0.17 | 1 | 1.1  | 0.12 | 1 | 1.15 |
|                 | putative PT   | 1    | 0.1  | 1 | 1.14 | 0.12 | 1 | 1.23 |
|                 | putative pir  | 1.04 | 0.1  | 1 | 0.84 | 0.1  | 1 | 0.87 |
|                 | putative me   | 1.02 | 0.05 | 1 | 1.06 | 0.11 | 1 | 0.89 |
| deoD            | purine nucl   | 0.93 | 0.03 | 1 | 1.07 | 0.14 | 1 | 1.09 |
| ump             |               | 0.11 | 0.02 | 1 | 1.05 | 0.16 | 1 | n/a  |
|                 | putative ex   | 0.9  | 0.1  | 0 | 0.96 | 0.17 | 0 | 0.63 |
| yjeH            | putative pe   | 0.96 | 0.08 | 1 | 1.09 | 0.15 | 1 | 1.06 |
|                 | putative me   | 1.04 | 0.06 | 1 | 1.13 | 0.09 | 1 | 1.03 |
| sdaC            | putative L-s  | 0.92 | 0.05 | 1 | 0.89 | 0.07 | 1 | 0.87 |
| rotein          |               | 0.09 | 0.02 | 1 | 0.81 | 0.12 | 1 | n/a  |
| stcB            | putative fir  | 1.04 | 0.07 | 1 | 0.83 | 0.05 | 1 | 0.94 |
|                 | putative n-f  | 1.11 | 0.05 | 1 | 0.9  | 0.12 | 1 | 0.81 |
| sseC            | putative pa   | 0.91 | 0.07 | 1 | 0.74 | 0.11 | 1 | 0.82 |
|                 | conserved     | 0.98 | 0.1  | 1 | 0.81 | 0.07 | 1 | 0.8  |
| or, lysR family |               | 0.14 | 0.26 | 1 | 0.9  | 0.36 | 1 | n/a  |
| ybiP            | putative me   | 1.05 | 0.11 | 1 | 0.91 | 0.09 | 1 | 0.81 |
| xthA            | exodeoxyri    | 0.99 | 0.08 | 1 | 0.75 | 0.06 | 1 | 0.82 |
| garD            | D-galactara   | 1.02 | 0.1  | 1 | 1.15 | 0.1  | 1 | 1.1  |
|                 | putative inr  | 1.01 | 0.1  | 1 | 0.95 | 0.11 | 1 | 0.89 |
|                 | possible m    | 0.97 | 0.09 | 1 | 1.14 | 0.08 | 1 | 1.21 |
| fliB            |               | 0.99 | 0.1  | 1 | 0.78 | 0.1  | 1 | 0.89 |
|                 | possible dr   | 1.05 | 0.12 | 1 | 1.02 | 0.1  | 1 | 1.22 |
|                 | possible Af   | 0.97 | 0.12 | 1 | 1.09 | 0.08 | 1 | 1.13 |
|                 | putative ex   | 1    | 0.1  | 1 | 0.82 | 0.1  | 1 | 0.81 |
|                 | AraC-famil    | 1.03 | 0.09 | 1 | 1.05 | 0.14 | 1 | 1.16 |
| fidL            | putative ex   | 1    | 0.03 | 1 | 1.46 | 0.27 | 1 | 1.43 |
|                 | conserved     | 0.99 | 0.1  | 1 | 1.24 | 0.11 | 1 | 1.34 |
| ssaG            | putative pa   | 0.93 | 0.26 | 0 | 1.1  | 0.16 | 0 | 0.79 |
| hpaX            | putative 4-f  | 0.98 | 0.06 | 1 | 0.85 | 0.18 | 1 | 0.76 |
| modF            | putative mc   | 1.02 | 0.08 | 1 | 0.93 | 0.07 | 1 | 0.74 |
|                 | putative me   | 1.16 | 0.06 | 1 | 0.92 | 0.05 | 1 | 0.87 |
| hscA            | chaperone     | 0.99 | 0.06 | 1 | 1.11 | 0.03 | 1 | 0.99 |
| yffB            | conserved     | 1.15 | 0.05 | 1 | 0.94 | 0.09 | 1 | 0.91 |
| ybaM            | conserved     | 1.1  | 0.08 | 1 | 0.93 | 0.09 | 1 | 0.85 |
|                 | putative me   | 1.19 | 0.08 | 1 | 0.66 | 0.07 | 1 | 0.62 |
|                 | conserved     | 0.94 | 0.08 | 1 | 1.26 | 0.12 | 1 | 1.34 |
|                 | conserved     | 1.01 | 0.15 | 1 | 1.06 | 0.07 | 1 | 1.15 |
| glpE            | conserved     | 0.98 | 0.12 | 1 | 1.14 | 0.07 | 1 | 1.29 |
| yhhK            | conserved     | 1.01 | 0.08 | 1 | 1.22 | 0.15 | 1 | 1.34 |

|                         |                  |      |      |       |      |      |       |      |
|-------------------------|------------------|------|------|-------|------|------|-------|------|
|                         | putative Ge      | 1.13 | 0.16 | 1     | 1.07 | 0.18 | 1     | 1.34 |
| ne protein              |                  | 0.21 | 0.05 | 1     | 1.23 | 0.18 | 1 n/a |      |
|                         | hypothetica      | 1.11 | 0.12 | 1     | 0.98 | 0.13 | 1     | 1.24 |
| yiaH                    |                  | 1.12 | 0.47 | 0     | 1.27 | 0.53 | 0     | 0.68 |
| ine protein             |                  | 0.14 | 0.02 | 1     | 1.18 | 0.07 | 1 n/a |      |
| yafA                    | conserved        | 1.01 | 0.06 | 1     | 1.08 | 0.08 | 1     | 0.8  |
| thrC                    | threonine s      | 1.1  | 0.1  | 1     | 1.12 | 0.07 | 1     | 0.94 |
| asr                     | putative se      | 1.06 | 0.08 | 1     | 0.66 | 0.07 | 1     | 0.76 |
|                         | conserved        | 1.05 | 0.09 | 1     | 0.71 | 0.04 | n/a   | 0.72 |
|                         | putative tra     | 0.98 | 0.06 | 1     | 1.09 | 0.06 | 1     | 1.02 |
| dapB                    | dihydrodipi      | 0.96 | 0.03 | 1     | 1.12 | 0.12 | 1     | 0.97 |
|                         | putative tra     | 0.99 | 0.11 | 1     | 1.01 | 0.09 | 1     | 1.01 |
|                         | putative ex      | 1.06 | 0.08 | 1     | 1.05 | 0.06 | 1     | 1.11 |
|                         | conserved        | 1.08 | 0.17 | 0     | 1.13 | 0.4  | 0     | 0.95 |
| rotein                  |                  | 0.37 | 0.05 | 1     | 0.95 | 0.17 | 1 n/a |      |
|                         | putative ac      | 1.05 | 0.06 | 1     | 1.1  | 0.1  | 1     | 1.09 |
|                         | putative me      | 0.97 | 0.11 | 1     | 1.12 | 0.1  | 1     | 1.24 |
|                         |                  | 0.1  | 0.04 | 1     | 0.86 | 0.1  | 1 n/a |      |
|                         | conserved        | 1.01 | 0.07 | 1     | 0.87 | 0.1  | 1     | 0.89 |
| tive minor tail protein |                  | 0.15 | 0.14 | 1     | 0.81 | 0.06 | 1 n/a |      |
| pnuC                    | pnuC prote       | 1.01 | 0.04 | 1     | 0.88 | 0.09 | 1     | 0.75 |
| in B                    |                  | 0.06 | 0.01 | 1     | 0.7  | 0.05 | n/a   | n/a  |
| sssembly abd aggregate  |                  | 0.03 | 0.01 | 1     | 0.65 | 0.11 | n/a   | n/a  |
| eshifts                 |                  | 0.22 | 0.06 | 1     | 0.88 | 0.08 | n/a   | n/a  |
| mbrial subunit          |                  | 0.04 | 0.01 | 1     | 0.69 | 0.06 | n/a   | n/a  |
| riae; usher protein     |                  | 0.03 | 0    | 1     | 0.68 | 0.07 | n/a   | n/a  |
| ine protein             |                  | 0.06 | 0.01 | 1     | 0.63 | 0.06 | n/a   | n/a  |
| fic DNA methylase       |                  | 0.08 | 0.02 | 1     | 0.69 | 0.06 | n/a   | n/a  |
| tar                     | methyl-acc       | 1.06 | 0.09 | 1     | 0.78 | 0.07 | 1     | 0.78 |
|                         |                  | 0.98 | 0.05 | 1     | 1.1  | 0.08 | n/a   | 1.03 |
|                         |                  | 0.89 | 0.05 | 1     | 1.1  | 0.16 | n/a   | 1.09 |
|                         |                  | 1.01 | 0.07 | 1     | 1.03 | 0.09 | n/a   | 0.99 |
|                         | Rhs-family       | 0.98 | 0.1  | 1     | 1.03 | 0.12 | 1     | 0.78 |
|                         |                  | 1.06 | 0.11 | 1     | 0.86 | 0.08 | n/a   | 0.85 |
|                         |                  | 1.01 | 0.12 | 1     | 0.82 | 0.06 | n/a   | 0.93 |
|                         |                  | 0.08 | 0.02 | 1     | 0.78 | 0.09 | n/a   | n/a  |
|                         |                  | 0.12 | 0.03 | 1     | 0.78 | 0.05 | n/a   | n/a  |
|                         |                  | 1.03 | 0.09 | 1     | 1.12 | 0.09 | n/a   | 1.23 |
|                         |                  | n/a  | n/a  | n/a   | n/a  | n/a  | n/a   |      |
| rffH                    | putative ba      | 8.64 | 1.01 | 1 n/a | n/a  | n/a  | n/a   | 0.83 |
|                         | glucose-1- $\mu$ | 2.65 | 3.98 | 1     | 1.39 | 0.15 | n/a   | 1.15 |
|                         | possible lip     | 5.32 | 0.86 | 1 n/a | n/a  | n/a  | n/a   | 1.22 |
|                         | putative DN      | 6.93 | 1.23 | 1 n/a | n/a  | n/a  | n/a   | 1.09 |
|                         | hypothetica      | 9.42 | 1.37 | 1 n/a | n/a  | n/a  | n/a   | 1.23 |
|                         | putative pe      | 1.18 | 0.1  | 1     | 0.71 | 0.06 | n/a   | 0.68 |
|                         | putative ba      | 3.38 | 0.56 | 1 n/a | n/a  | n/a  | n/a   | 0.86 |
|                         | putative ex      | 7.08 | 1.4  | 1 n/a | n/a  | n/a  | n/a   | 0.86 |
|                         |                  | 1.7  | 0.1  | 1     | 1.05 | 0.11 | n/a   | 0.89 |
| stgA                    | probable fir     | 5.57 | 1.33 | 1 n/a | n/a  | n/a  | n/a   | 1.31 |
|                         | hypothetica      | 4.99 | 0.78 | 1 n/a | n/a  | n/a  | n/a   | 0.74 |
|                         | hypothetica      | 8.02 | 2.57 | 1 n/a | n/a  | n/a  | n/a   | 0.65 |
|                         | putative ex      | 7.98 | 1.09 | 1 n/a | n/a  | n/a  | n/a   | 0.86 |

|       |                             |       |      |     |      |      |     |      |
|-------|-----------------------------|-------|------|-----|------|------|-----|------|
|       | putative ex                 | 5.6   | 0.81 | 1   | n/a  | n/a  | n/a | 0.99 |
|       |                             | 5.93  | 1.96 | 1   | n/a  | n/a  | n/a | 1.08 |
| staE  | putative firr               | 10.61 | 2.26 | 1   | n/a  | n/a  | n/a | 0.89 |
|       | hypothetica                 | 4.08  | 1.1  | 1   | n/a  | n/a  | n/a | 0.77 |
|       | probable se                 | 1.49  | 0.26 | 1   | n/a  | n/a  | n/a | 0.85 |
|       | hypothetica                 | 8.26  | 1.43 | 1   | n/a  | n/a  | n/a | 1.14 |
|       | hypothetica                 | 7.3   | 2.13 | 1   | n/a  | n/a  | n/a | 1.29 |
|       | putative lipi               | 4.64  | 0.8  | 1   | n/a  | n/a  | n/a | 1.17 |
|       | hypothetica                 | 7.67  | 1.72 | 1   | n/a  | n/a  | n/a | 1.02 |
|       | hypothetica                 | 22.34 | 2.68 | 1   | n/a  | n/a  | n/a | 1.06 |
|       | hypothetica                 | 38.23 | 7.89 | 1   | n/a  | n/a  | n/a | 1.04 |
|       | hypothetica                 | 12.66 | 1.13 | 1   | n/a  | n/a  | n/a | 1.15 |
|       | phage pola                  | 10.81 | 2.45 | 1   | n/a  | n/a  | n/a | 1.02 |
|       | hypothetica                 | 9.37  | 1.55 | 1   | n/a  | n/a  | n/a | 1.13 |
|       | putative me                 | 11.42 | 2.04 | 1   | n/a  | n/a  | n/a | 0.98 |
|       | hypothetica                 | 14.36 | 3.53 | 1   | n/a  | n/a  | n/a | 1.14 |
| pilV  | prepilin                    | 14.1  | 4.13 | 1   | n/a  | n/a  | n/a | 1.02 |
|       |                             | n/a   | n/a  | n/a | n/a  | n/a  | n/a | n/a  |
|       |                             | n/a   | n/a  | n/a | n/a  | n/a  | n/a | n/a  |
|       |                             | n/a   | n/a  | n/a | n/a  | n/a  | n/a | n/a  |
|       |                             | n/a   | n/a  | n/a | n/a  | n/a  | n/a | n/a  |
|       |                             | n/a   | n/a  | n/a | n/a  | n/a  | n/a | n/a  |
|       |                             | n/a   | n/a  | n/a | n/a  | n/a  | n/a | n/a  |
| spak  | secretory p                 | 1.03  | 0.09 | 1   | 1.23 | 0.33 | 1   | 1.23 |
| adk   | adenylate k                 | 0.98  | 0.1  | 1   | 1.01 | 0.13 | 1   | 0.87 |
| cbiH  | precorrin-3                 | 0.78  | 0.14 | 1   | 0.83 | 0.09 | 1   | 0.86 |
| uhpC  | regulatory p                | 1     | 0.14 | 1   | 1.49 | 0.26 | 1   | 1.28 |
| citE2 | citrate lyase               | 1     | 0.15 | 1   | 1.12 | 0.23 | 1   | 1.11 |
| ksgA  | dimethylad                  | 1.05  | 0.16 | 1   | 1.24 | 0.23 | 1   | 1.21 |
| dnaE  | DNA polym                   | 0.99  | 0.12 | 1   | 1.04 | 0.15 | 1   | 0.98 |
| nlp   | Ner-like re                 | 1.08  | 0.14 | 1   | 1.3  | 0.37 | 0   | 1.08 |
| rpsI  | 30S riboso                  | 0.94  | 0.12 | 1   | 1.08 | 0.18 | 1   | 1.28 |
|       | conserved                   | 1.01  | 0.08 | 1   | 1.24 | 0.31 | 1   | 1.3  |
| mrdB  | rod shape-                  | 1.08  | 0.06 | 1   | 0.88 | 0.06 | 1   | 0.87 |
| gltL  | glutamate/                  | 0.93  | 0.09 | 1   | 1.04 | 0.28 | 1   | 0.9  |
| gcd   | glucose de                  | 0.95  | 0.06 | 1   | 1.07 | 0.09 | 1   | 1.06 |
| ligT  | 2'-5' RNA li                | 0.93  | 0.05 | 1   | 1.18 | 0.14 | 1   | 0.95 |
| yaet  | outer mem                   | 0.93  | 0.08 | 1   | 1.07 | 0.13 | 1   | 1    |
|       | putative D-                 | 0.97  | 0.04 | 1   | 0.83 | 0.18 | 1   | 0.74 |
|       | putative se                 | 0.93  | 0.13 | 1   | 0.82 | 0.2  | 1   | 0.77 |
|       | transcriptional repressor ( | 0.13  | 0.03 | 1   | 1.29 | 0.15 | 1   | n/a  |
| ftsX  | cell divisio                | 0.97  | 0.04 | 1   | 1.18 | 0.35 | 1   | 1.26 |
|       | conserved                   | 1.03  | 0.15 | 1   | 1.34 | 0.26 | 1   | 1.25 |
|       | putative dru                | 0.85  | 0.22 | 1   | 1.19 | 0.16 | 1   | 0.96 |
|       | possible ac                 | 0.97  | 0.09 | 1   | 1.06 | 0.16 | 1   | 1.03 |
|       | acyltransferase             | 0.09  | 0.03 | 1   | 1.05 | 0.21 | 1   | n/a  |
|       | conserved                   | 0.99  | 0.07 | 1   | 0.83 | 0.18 | 1   | 0.84 |
|       | ar to gpN, major capsid     | 1.16  | 0.19 | 1   | 1.07 | 0.11 | 1   | 1.19 |
|       | rotein                      | 0.2   | 0.03 | 1   | 1.04 | 0.27 | 1   | n/a  |
|       |                             | 0.52  | 0.05 | 1   | 1.1  | 0.3  | 0   | n/a  |
|       | putative me                 | 0.95  | 0.07 | 1   | 1.03 | 0.31 | 1   | 0.84 |
| wrbA  | trp repress                 | 1     | 0.07 | 1   | 0.74 | 0.16 | 1   | 0.7  |

|                             |                                           |      |      |   |      |      |       |      |
|-----------------------------|-------------------------------------------|------|------|---|------|------|-------|------|
|                             | conserved                                 | 0.91 | 0.07 | 1 | 1.04 | 0.41 | 1     | 0.88 |
| mobA                        | molybdopterin                             | 1    | 0.08 | 1 | 1.25 | 0.11 | 1     | 1.35 |
| hpcD                        | 5-carboxymethyl                           | 0.85 | 0.06 | 1 | 1.01 | 0.22 | 0     | 0.82 |
|                             | putative methyltransferase                | 1.08 | 0.12 | 1 | 0.71 | 0.08 | 1     | 0.71 |
| acpP                        | acyl carrier protein                      | 0.97 | 0.16 | 1 | 0.95 | 0.27 | 0     | 0.76 |
| mfd                         | transcription factor                      | 0.96 | 0.03 | 1 | 0.85 | 0.22 | 1     | 0.75 |
| glgB                        | 1,4-alpha-D-glucanase                     | 0.95 | 0.05 | 1 | 1.26 | 0.13 | 1     | 1.36 |
| mdoG                        | periplasmic chaperone                     | 1.05 | 0.14 | 1 | 0.84 | 0.07 | 1     | 0.84 |
| yrfF                        | putative methyltransferase                | 0.97 | 0.12 | 1 | 1.22 | 0.24 | 1     | 1.26 |
| ropein                      |                                           | 0.14 | 0.06 | 1 | 1.16 | 0.11 | 1 n/a |      |
|                             |                                           | 0.88 | 0.19 | 1 | 0.88 | 0.17 | 1     | 0.9  |
|                             |                                           | 0.96 | 0.2  | 1 | 1.25 | 0.34 | 1     | 1.59 |
| glpF                        | glycerol uptake                           | 0.97 | 0.15 | 1 | 1.17 | 0.37 | 1     | 1.24 |
| ropein                      |                                           | 0.14 | 0.04 | 1 | 1.29 | 0.1  | 1 n/a |      |
| ε protein                   |                                           | 0.17 | 0.02 | 1 | 1.19 | 0.06 | 1 n/a |      |
|                             | putative xanthine oxidase                 | 0.96 | 0.1  | 1 | 1.12 | 0.15 | 1     | 1.03 |
| dmsA                        |                                           | 1    | 0.06 | 1 | 1.16 | 0.11 | 1     | 1.3  |
| ropein                      |                                           | 0.11 | 0.02 | 1 | 1.07 | 0.15 | 1 n/a |      |
| artQ                        | arginine transferase                      | 0.98 | 0.08 | 1 | 0.93 | 0.08 | 1     | 0.75 |
| gltX                        | glutamyl-tRNA synthetase                  | 0.89 | 0.07 | 1 | 0.89 | 0.07 | 1     | 1    |
| diverse minor tail protein  |                                           | 0.36 | 0.04 | 0 | 1.21 | 0.38 | 0 n/a |      |
|                             | conserved                                 | 0.9  | 0.05 | 1 | 0.9  | 0.1  | 1     | 0.83 |
|                             |                                           | 0.94 | 0.07 | 1 | 0.75 | 0.07 | 1     | 0.88 |
| ropein                      |                                           | 0.1  | 0.03 | 1 | 1.18 | 0.17 | 1 n/a |      |
| enzymase I                  |                                           | 0.16 | 0.03 | 1 | 1.23 | 0.15 | 1 n/a |      |
| proP                        | ProP                                      | 0.99 | 0.16 | 1 | 1.19 | 0.14 | 1     | 1.18 |
| efp                         | elongation factor                         | 1.03 | 0.11 | 1 | 1.42 | 0.21 | 1     | 1.31 |
| mepA                        | penicillin-inactivating enzyme            | 0.99 | 0.17 | 1 | 0.87 | 0.08 | 1     | 0.97 |
| yfeN                        | conserved                                 | 1.17 | 0.17 | 1 | 0.94 | 0.29 | 1     | 0.95 |
|                             | putative exonuclease                      | 1.03 | 0.14 | 1 | 0.91 | 0.19 | 1     | 1    |
| enzymase protein            |                                           | 0.99 | 0.15 | 0 | 1.12 | 0.51 | n/a   | 1.01 |
| iagA                        | invasion protein                          | 0.98 | 0.13 | 1 | 1.06 | 0.18 | 1     | 1.27 |
| artJ                        | probable aminotransferase                 | 1.04 | 0.14 | 1 | 1.11 | 0.08 | 1     | 1.21 |
| priB                        | primosome assembly factor                 | 1.17 | 0.23 | 1 | 1.09 | 0.32 | 0     | 1.21 |
| napA                        | probable nucleoside diphosphate kinase    | 1.07 | 0.08 | 1 | 1    | 0.46 | 1     | 0.95 |
| transport protein           |                                           | 0.87 | 0.05 | 1 | 1.09 | 0.08 | 1     | 1.13 |
|                             | conserved                                 | 1.08 | 0.09 | 1 | 1    | 0.29 | 1     | 0.99 |
| nuoC                        | NADH dehydrogenase                        | 1.03 | 0.07 | 1 | 0.99 | 0.11 | 1     | 1.04 |
| transcriptional regulators, |                                           | 0.11 | 0.03 | 1 | 1.33 | 0.85 | 1 n/a |      |
| fliY                        | cysteine-binding protein                  | 1.05 | 0.04 | 1 | 0.8  | 0.11 | 1     | 0.87 |
| bfr                         | bacterioferroxidase                       | 1.03 | 0.06 | 1 | 0.94 | 0.12 | 1     | 1.29 |
| yccF                        | putative methyltransferase                | 1    | 0.1  | 1 | 0.96 | 0.21 | 1     | 0.86 |
| potD                        | spermidine acetyltransferase              | 0.99 | 0.05 | 1 | 0.74 | 0.06 | 1     | 0.87 |
|                             | putative ethanolamine N-methyltransferase | 1.11 | 0.21 | 1 | 1    | 0.09 | 1     | 1    |
| potB                        | spermidine acetyltransferase              | 1    | 0.19 | 1 | 0.86 | 0.18 | 1     | 0.8  |
|                             | putative oxidoreductase                   | 1.03 | 0.09 | 1 | 0.66 | 0.06 | 1     | 0.84 |
| yjfJ                        |                                           | 0.84 | 0.13 | 1 | 1.12 | 0.18 | 1     | 1.21 |
| ytfJ                        | putative exonuclease                      | 1.1  | 0.14 | 1 | 1.12 | 0.14 | 1     | 1.09 |
|                             |                                           | 0.07 | 0.02 | 1 | 1.22 | 0.17 | 1 n/a |      |
|                             | conserved                                 | 1.21 | 0.1  | 1 | 0.76 | 0.08 | 1     | 0.81 |
|                             | putative methyltransferase                | 0.92 | 0.11 | 1 | 0.72 | 0.14 | 1     | 0.88 |
| hns                         | DNA-binding protein                       | 1.12 | 0.12 | 1 | 0.98 | 0.8  | 1     | 0.87 |

|              |                      |      |      |   |      |      |     |      |
|--------------|----------------------|------|------|---|------|------|-----|------|
| flgA         | flagellar ba         | 1.09 | 0.1  | 1 | 0.85 | 0.13 | 1   | 0.81 |
|              | abequosyltransferase | 0.34 | 0.05 | 1 | 0.86 | 0.1  | 1   | n/a  |
| ilvB         | acetohydro           | 0.96 | 0.06 | 1 | 1.48 | 0.11 | 1   | 1.31 |
| atpC         | ATP synthase         | 0.87 | 0.04 | 1 | 1.3  | 0.18 | 0   | 1.29 |
| nadB         | L-aspartate          | 0.84 | 0.06 | 1 | 1.02 | 0.13 | 1   | 1.12 |
| yaeB         | conserved            | 0.82 | 0.11 | 1 | 1.04 | 0.11 | 1   | 0.97 |
| djlA         | DnaJ-like p          | 0.96 | 0.12 | 1 | 1.15 | 0.14 | 1   | 1.07 |
| yfcA         | putative me          | 0.97 | 0.08 | 1 | 0.9  | 0.11 | 1   | 0.95 |
|              | conserved            | 0.99 | 0.08 | 1 | 0.91 | 0.13 | 1   | 0.82 |
|              | conserved            | 1.11 | 0.17 | 1 | 0.86 | 0.15 | 1   | 0.87 |
| ompF         | outer mem            | 1.14 | 0.13 | 1 | 1.08 | 0.28 | 1   | 0.95 |
| livM         | high-affinity        | 1.06 | 0.18 | 1 | 1.14 | 0.07 | 1   | 1.12 |
| ssaL         | putative se          | 0.98 | 1.9  | 1 | 0.72 | 0.26 | 1   | 0.83 |
| napH         | ferredoxin-          | 1.22 | 0.12 | 1 | 1.32 | 0.26 | 0   | 0.88 |
|              | conserved            | 0.54 | 0.06 | 1 | 0.91 | 0.16 | n/a | 1.08 |
|              | conserved            | 1.01 | 0.07 | 1 | 1.15 | 0.16 | 1   | 1.18 |
| bisC         | biotin sulfo         | 0.91 | 0.11 | 1 | 1.22 | 0.14 | 1   | 1.34 |
|              |                      | 0.82 | 0.09 | 1 | 1.08 | 0.18 | 1   | 1.39 |
|              | conserved            | 0.99 | 0.09 | 1 | 1.04 | 0.18 | 1   | 1.38 |
| yfeD         | conserved            | 1.12 | 0.29 | 0 | 1.19 | 0.23 | 1   | 1.1  |
|              | putative me          | 1.03 | 0.09 | 1 | 1.31 | 0.36 | n/a | 1.05 |
| sfbA         | lipoprotein          | 1.03 | 0.2  | 0 | 1.61 | 0.52 | 0   | 0.92 |
| ybdO         | putative lys         | 0.94 | 0.1  | 1 | 0.86 | 0.19 | 1   | 0.92 |
| ilar to head | protein gp7          | 0.05 | 0.01 | 1 | 0.89 | 0.12 | 1   | n/a  |
| lplA         | lipoate-prot         | 0.75 | 0.06 | 1 | 1.18 | 0.17 | 1   | 1.09 |
| viaJ         | putative tra         | 1.01 | 0.04 | 1 | 1.37 | 0.18 | 1   | 1.44 |
| yhjB         | hypothetica          | 0.97 | 0.05 | 1 | 1.22 | 0.13 | 1   | 1.29 |
|              | gntR family          | 1.03 | 0.09 | 1 | 1.38 | 0.17 | 1   | 1.37 |
| ne protein   |                      | 0.29 | 0.3  | 1 | 1.31 | 0.13 | 1   | n/a  |
|              | putative me          | 1.12 | 0.18 | 1 | 1.19 | 0.19 | 1   | 1.19 |
|              | putative an          | 1.13 | 0.15 | 1 | 0.76 | 0.12 | 1   | 0.81 |
|              | putative me          | 1.14 | 0.18 | 1 | 1.3  | 0.25 | 1   | 1.24 |
| mviM         | putative vir         | 0.96 | 0.11 | 1 | 0.75 | 0.15 | 1   | 0.79 |
| eutB         | ethanolami           | 0.97 | 0.09 | 1 | 0.99 | 0.21 | 1   | 0.99 |
| yihZ         | conserved            | 1.07 | 0.16 | 1 | 1.41 | 0.15 | 1   | 1.47 |
| lipA         | lipoic acid s        | 0.94 | 0.09 | 1 | 1.11 | 0.27 | 1   | 0.93 |
| ssaS         | putative typ         | 1.1  | 0.08 | 1 | 1.08 | 0.29 | 1   | 0.69 |
| cbiA         | cobyrinic ac         | 0.99 | 0.06 | 1 | 0.83 | 0.11 | 1   | 0.87 |
| cysE         | serine acet          | 0.97 | 0.06 | 1 | 1.36 | 0.1  | 1   | 1.26 |
| ybhN         | putative me          | 0.88 | 0.05 | 1 | 1.1  | 0.18 | 1   | 0.8  |
| modC         | molybdenu            | 0.99 | 0.06 | 1 | 0.97 | 0.11 | 1   | 0.86 |
| pykF         | pyruvate ki          | 0.96 | 0.07 | 1 | 0.83 | 0.1  | 1   | 0.86 |
| hisP         | histidine tra        | 0.94 | 0.06 | 1 | 0.92 | 0.14 | 1   | 0.89 |
| leuA         | 2-isopropyl          | 0.91 | 0.04 | 1 | 1.1  | 0.14 | 1   | 1.06 |
| htrA         | protease D           | 0.89 | 0.07 | 1 | 1.04 | 0.13 | 1   | 0.98 |
| hupB         | DNA-bindir           | 1.22 | 0.21 | 1 | 1.08 | 0.12 | 1   | 0.88 |
| trkA         | potassium            | 1.08 | 0.32 | 1 | 1.21 | 0.22 | 1   | 1.18 |
| sipF         | probable ac          | 0.95 | 0.1  | 1 | 1.02 | 0.38 | 1   | 1.14 |
| fimD         | outer mem            | 0.99 | 0.12 | 1 | 0.95 | 0.12 | 1   | 0.92 |
|              | putative me          | 1.06 | 0.11 | 1 | 0.86 | 0.33 | 1   | 0.79 |
| sucD         | succinyl-Co          | 0.95 | 0.15 | 1 | 1.05 | 0.15 | 1   | 0.87 |
| hydG         | transcriptio         | 0.91 | 0.17 | 1 | 1.31 | 0.16 | 1   | 1.24 |

|             |              |      |      |   |      |          |       |      |
|-------------|--------------|------|------|---|------|----------|-------|------|
|             | conserved    | 0.95 | 0.08 | 1 | 1.13 | 0.15     | 1     | 1.26 |
| pduC        | glycerol de  | 0.83 | 0.05 | 1 | 0.88 | 0.17     | 1     | 0.9  |
|             |              | 0.72 | 0.07 | 1 | 1.09 | 0.14     | 1     | 1.31 |
| nuoH        | NADH dehyd   | 1.07 | 0.12 | 1 | 0.94 | 0.08     | 1     | 0.87 |
| yhcP        | putative me  | 1.01 | 0.04 | 1 | 1.08 | 0.16     | 1     | 1.18 |
|             | putative ex  | 1.02 | 0.13 | 1 | 1.19 | 0.17 n/a |       | 1.22 |
| tyrA        | chorismate   | 1    | 0.04 | 1 | 0.88 | 0.1      | 1     | 0.99 |
| csgF        | assembly/t   | 1.01 | 0.13 | 1 | 0.97 | 0.23     | 1     | 0.77 |
| yihV        | putative su  | 0.94 | 0.06 | 1 | 1.25 | 0.13     | 1     | 1.25 |
| yjaG        | conserved    | 0.98 | 0.07 | 1 | 1.13 | 0.1      | 1     | 1.33 |
| hycH        | formate hyd  | 0.87 | 0.12 | 1 | 1.22 | 0.22     | 1     | 1.2  |
|             | putative me  | 0.99 | 0.13 | 1 | 1.37 | 0.1      | 1     | 1.45 |
| miaB        | MiaB prote   | 0.91 | 0.15 | 1 | 0.95 | 0.13     | 1     | 0.8  |
| ybaE        | putative so  | 0.99 | 0.16 | 1 | 1.04 | 0.1      | 1     | 0.85 |
| nrfA        | cytochrome   | 1.05 | 0.13 | 1 | 1.13 | 0.15     | 1     | 1.25 |
|             | invasin-like | 1.03 | 0.16 | 1 | 0.73 | 0.24     | 1     | 0.77 |
| prmA        | ribosomal p  | 0.95 | 0.14 | 1 | 1.05 | 0.09     | 1     | 1.4  |
| mltA        | membrane     | 1.05 | 0.13 | 1 | 1.11 | 0.23     | 1     | 1.18 |
|             | possible su  | 1.11 | 0.08 | 1 | 1.04 | 0.18     | 1     | 1.07 |
| cpxA        | two-compo    | 0.98 | 0.06 | 1 | 1.42 | 0.16     | 1     | 1.23 |
| deoR        | deoxyribos   | 0.88 | 0.12 | 1 | 1.06 | 0.35     | 1     | 0.79 |
| cyaY        | CyaY prote   | 0.97 | 0.14 | 1 | 1.34 | 0.1      | 1     | 1.34 |
| ilvD        | dihydroxya   | 0.83 | 0.03 | 1 | 1.44 | 0.17     | 1     | 1.27 |
| caiA        | probable c   | 1.1  | 0.04 | 1 | 1.06 | 0.2      | 1     | 1.15 |
| ilvM        | acetohydro   | 1    | 0.08 | 1 | 1.29 | 0.15     | 1     | 1.2  |
| yfgA        | putative DN  | 0.97 | 0.07 | 1 | 1.01 | 0.17     | 1     | 1.04 |
| minC        | septum site  | 0.95 | 0.08 | 1 | 0.86 | 0.21     | 1     | 0.9  |
|             | conserved    | 0.99 | 0.1  | 1 | 0.79 | 0.47     | 1     | 0.78 |
| fucA        | fuculose-1-  | 0.95 | 0.06 | 1 | 1.1  | 0.14     | 1     | 1.2  |
| iap         | alkaline ph  | 0.94 | 0.08 | 1 | 1.04 | 0.07     | 1     | 1.22 |
| yigM        | putative me  | 1.05 | 0.15 | 1 | 1.34 | 0.17 n/a |       | 1.2  |
| hemC        | porphobilin  | 0.99 | 0.1  | 1 | 1.41 | 0.24     | 1     | 1.35 |
| secE        | preprotein   | 1.06 | 0.14 | 1 | 1.16 | 0.23     | 1     | 1.35 |
| sdaA        | L-serine de  | 0.98 | 0.06 | 1 | 0.75 | 0.21     | 1     | 0.97 |
| chaA        | putative ca  | 1.05 | 0.13 | 1 | 0.8  | 0.07     | 1     | 0.81 |
|             | putative su  | 1    | 0.08 | 1 | 0.69 | 0.03     | 1     | 0.73 |
| manZ        | phosphotra   | 1.03 | 0.07 | 1 | 0.64 | 0.13     | 1     | 0.78 |
|             | putative ca  | 1.03 | 0.13 | 1 | 0.7  | 0.14     | 1     | 0.87 |
| aspS        | aspartyl-tR  | 1    | 0.04 | 1 | 0.78 | 0.12     | 1     | 0.86 |
| hyi         | hydroxypyr   | 0.96 | 0.08 | 1 | 1.01 | 0.23     | 1     | 0.92 |
| ybcI        | putative me  | 0.75 | 0.06 | 1 | 0.97 | 0.09     | 1     | 0.85 |
|             | hypothetica  | 0.94 | 0.06 | 1 | 1    | 0.13     | 1     | 0.84 |
| ansP        | L-asparagin  | 1.05 | 0.05 | 1 | 0.66 | 0.09     | 1     | 0.75 |
|             | putative re  | 0.98 | 0.07 | 1 | 0.71 | 0.2      | 1     | 0.75 |
| glgX        | putative gly | 0.96 | 0.09 | 1 | 0.61 | 0.05     | 1     | 0.72 |
| dadA        | D-amino ac   | 0.98 | 0.07 | 1 | 0.71 | 0.12     | 1     | 0.86 |
| ε class III |              | 0.1  | 0.02 | 1 | 0.71 | 0.07     | 1 n/a |      |
|             | putative cy  | 0.97 | 0.17 | 1 | 0.68 | 0.14     | 1     | 0.79 |
|             | putative thi | 0.97 | 0.07 | 1 | 0.71 | 0.07     | 1     | 0.86 |
|             | conserved    | 1.11 | 0.14 | 1 | 0.67 | 0.06     | 1     | 0.76 |
| dpiA        | transcriptio | 1.15 | 0.07 | 1 | 0.99 | 0.15     | 1     | 0.91 |
| lpxK        | tetraacyldis | 1.02 | 0.11 | 1 | 0.89 | 0.2      | 1     | 0.83 |

|             |               |      |      |   |      |      |       |      |
|-------------|---------------|------|------|---|------|------|-------|------|
| serS        | seryl-tRNA    | 1.1  | 0.14 | 1 | 0.74 | 0.08 | 1     | 0.77 |
| kdgR        | probable gl   | 1.07 | 0.16 | 1 | 1.01 | 0.14 | 1     | 1.09 |
|             | putative lya  | 0.98 | 0.17 | 1 | 1.02 | 0.15 | 1     | 0.9  |
| roetin      |               | 0.45 | 0.07 | 1 | 1.32 | 0.23 | 1     | 1.23 |
|             | conserved     | 0.96 | 0.1  | 1 | 1.05 | 0.06 | 1     | 1.2  |
|             | putative glu  | 0.92 | 0.06 | 1 | 1.33 | 0.23 | 1     | 1.34 |
|             |               | 0.61 | 0.07 | 1 | 1.36 | 0.09 | 1     | 1.46 |
| recN        | probable tv   | 0.92 | 0.06 | 1 | 1.15 | 0.14 | 1     | 1.31 |
|             | DNA repair    | 0.92 | 0.07 | 1 | 0.96 | 0.14 | 1     | 1.16 |
| yfhS        | conserved     | 0.97 | 0.1  | 1 | 1.05 | 0.15 | 1     | 1.13 |
|             |               | 0.06 | 0.01 | 1 | 1.19 | 0.15 | 1 n/a |      |
|             |               | 0.96 | 0.05 | 1 | 1.13 | 0.09 | 1     | 1.11 |
|             |               | 0.95 | 0.06 | 1 | 1.18 | 0.13 | 1     | 1.32 |
| yfiN        | putative pu   | 1.03 | 0.14 | 1 | 1.3  | 0.23 | 1     | 1.27 |
|             | putative me   | 0.93 | 0.13 | 1 | 1.05 | 0.15 | 1     | 1.19 |
| pin         |               | 0.74 | 0.11 | 1 | 0.92 | 0.12 | 1     | 0.87 |
| metK        | S-adenosyl    | 1.09 | 0.09 | 1 | 1.09 | 0.1  | 1     | 1.2  |
| ampG        | AmpG prot     | 0.94 | 0.14 | 1 | 0.98 | 0.16 | 1     | 0.82 |
|             |               | 0.17 | 0.05 | 1 | 1.23 | 0.14 | 1 n/a |      |
| yegN        | putative RM   | 0.87 | 0.08 | 1 | 0.9  | 0.11 | 1     | 0.81 |
| yohF        | putative ox   | 0.91 | 0.06 | 1 | 0.95 | 0.1  | 1     | 0.79 |
| yhdN        | conserved     | 0.86 | 0.14 | 1 | 1.04 | 0.12 | 1     | 1.3  |
| ybjZ        | conserved     | 0.97 | 0.16 | 1 | 0.9  | 0.11 | 1     | 0.81 |
| sgaE        | probable cl   | 1.06 | 0.13 | 1 | 1.06 | 0.15 | 1     | 1.18 |
|             | putative inr  | 0.98 | 0.1  | 1 | 1    | 0.16 | 1     | 1.03 |
|             | putative N-   | 0.87 | 0.06 | 1 | 0.93 | 0.1  | 1     | 0.74 |
| yjeB        | conserved     | 0.99 | 0.1  | 1 | 1.06 | 0.2  | 1     | 1.22 |
| tdcA        | TDC opero     | 0.92 | 0.11 | 1 | 1.05 | 0.06 | 1     | 1.41 |
| hybC        | hydrogena     | 0.9  | 0.09 | 1 | 1.11 | 0.19 | 1     | 1.22 |
| srlB        | PTS syster    | 0.93 | 0.07 | 1 | 1.16 | 0.27 | 1     | 1.02 |
| hypf        | hydrogena     | 0.91 | 0.07 | 1 | 1.07 | 0.09 | 1     | 1.14 |
| regulator   |               | 0.26 | 0.06 | 1 | 0.97 | 0.12 | 1 n/a |      |
| hycF        | formate hy    | 0.76 | 0.06 | 1 | 1.13 | 0.22 | 1     | 1.13 |
| rplY        | 50s ribosor   | 1.04 | 0.28 | 1 | 1.06 | 0.21 | 1     | 0.97 |
| wcaF        | putative ac   | 1.08 | 0.14 | 1 | 0.84 | 0.16 | 1     | 0.81 |
| cirA        | colicin I rec | 1.07 | 0.09 | 1 | 0.85 | 0.24 | 1     | 0.87 |
| kdsA        | 2-dehydro-    | 1.1  | 0.14 | 1 | 0.66 | 0.06 | 1     | 0.79 |
|             | conserved     | 1.04 | 0.17 | 0 | 1.66 | 0.49 | 0     | 0.7  |
|             | hypothetica   | 1.04 | 0.14 | 1 | 0.98 | 0.15 | 1     | 0.92 |
| uvrB        | excision nu   | 1.04 | 0.14 | 1 | 0.86 | 0.09 | 1     | 0.8  |
| hydrogenase |               | 0.08 | 0.01 | 1 | 0.8  | 0.1  | 1 n/a |      |
| ptsO        | phosphoca     | 1.02 | 0.14 | 1 | 1.19 | 0.36 | 0     | 1.13 |
| slsA        | conserved     | 1.03 | 0.1  | 1 | 1.23 | 0.22 | 1     | 1.49 |
| ybiT        | ABC transp    | 0.97 | 0.05 | 1 | 0.93 | 0.09 | 1     | 0.78 |
| degQ        | serine prot   | 0.96 | 0.09 | 1 | 1.05 | 0.12 | 1     | 1.29 |
| gatC        | PTS syster    | 1.01 | 0.08 | 1 | 1.05 | 0.23 | 1     | 1.34 |
| dsbA        | disulfide isc | 1.03 | 0.05 | 1 | 1.01 | 0.12 | 1     | 1.34 |
| yojL        | thiamine bi   | 0.92 | 0.06 | 1 | 0.86 | 0.1  | 1     | 0.79 |
| ybgC        | conserved     | 1.04 | 0.14 | 1 | 1.05 | 0.16 | 0     | 0.79 |
|             | Penicillin-b  | 0.96 | 0.16 | 1 | 1.1  | 0.13 | 1     | 1.31 |
| cspA        | conserved     | 0.97 | 0.12 | 1 | 1.14 | 0.12 | 1     | 1.23 |
|             | cold shock    | 1    | 0.22 | 0 | 1.17 | 0.26 | 0     | 1    |



|                         |               |       |      |       |      |          |       |      |
|-------------------------|---------------|-------|------|-------|------|----------|-------|------|
|                         | conserved     | 1.07  | 0.09 | 1     | 1.07 | 0.16     | 1     | 1.23 |
|                         | hypothetica   | 1.01  | 0.08 | 1     | 0.92 | 0.12     | 1     | 0.9  |
| hutC                    | histidine uti | 1.1   | 0.11 | 1     | 0.88 | 0.09     | 1     | 0.78 |
| cydB                    | cytochrome    | 1.12  | 0.1  | 1     | 0.88 | 0.08     | 1     | 0.63 |
| rpmB                    | 50S riboso    | 0.98  | 0.09 | 1     | 1.4  | 0.11     | 1     | 1.41 |
| prgJ                    | pathogenic    | 1     | 0.14 | 1     | 1.12 | 0.1      | 1     | 1.2  |
| ssaM                    | putative pa   | 0.96  | 0.16 | 1     | 0.82 | 0.26     | 0     | 0.74 |
|                         | conserved     | 1.08  | 0.08 | 1     | 0.78 | 0.08     | 1     | 0.99 |
|                         | hypothetica   | 0.93  | 0.09 | 1     | 0.96 | 0.18     | 1     | 0.98 |
| rotein                  |               | 0.98  | 0.06 | 1     | 1.19 | 0.11     | 1 n/a |      |
|                         | putative pa   | 1.04  | 0.04 | 1     | 0.68 | 0.04     | 1     | 0.73 |
| yhgG                    | conserved     | 0.93  | 0.07 | 1     | 1.21 | 0.08     | 1     | 1.28 |
| nusG                    | transcriptio  | 0.95  | 0.08 | 1     | 1.21 | 0.12     | 1     | 1.3  |
|                         | possible Ly   | 1.07  | 0.06 | 1     | 1.26 | 0.14     | 1     | 1.1  |
|                         | possible tra  | 1     | 0.09 | 1     | 1.31 | 0.07     | 1     | 1.21 |
|                         |               | 1.38  | 0.16 | 1     | 0.98 | 0.11 n/a |       | 1.15 |
|                         | putative ac   | 1.18  | 0.16 | 1     | 0.71 | 0.07     | 1     | 0.7  |
| araA                    | L-arabinosi   | 1.04  | 0.06 | 1     | 1.04 | 0.1      | 1     | 0.96 |
| malX                    |               | 1.22  | 0.1  | 1     | 0.68 | 0.09     | 1     | 0.76 |
|                         | hypothetica   | 0.94  | 0.15 | 1     | 0.76 | 0.08     | 1     | 0.81 |
|                         | doubtful CI   | 0.95  | 0.15 | 1     | 1.03 | 0.19     | 1     | 1.25 |
|                         | conserved     | 1.1   | 0.13 | 1     | 1.29 | 0.44     | 0     | 0.89 |
| leuL                    | leu operon    | 1.06  | 0.17 | 0     | 1.28 | 0.42     | 0     | 1.01 |
|                         | hypothetica   | 0.85  | 0.16 | 0     | 1.33 | 0.29     | 0     | 0.95 |
| ine protein             |               | 1.09  | 0.24 | 0     | 1.34 | 0.44     | 0 n/a |      |
| ne protein              |               | 0.95  | 0.12 | 1     | 0.74 | 0.1 n/a  |       | 0.85 |
| ivbL                    | ilvBN opero   | 0.98  | 0.08 | 0     | 1.44 | 0.31     | 0     | 1.16 |
|                         | conserved     | 0.96  | 0.14 | 1     | 1.07 | 0.08     | 1     | 1.25 |
|                         | PGM/PMM       | 0.94  | 0.04 | 1     | 1.14 | 0.12     | 1     | 1.08 |
|                         | putative pro  | 1     | 0.11 | 1     | 0.77 | 0.09     | 1     | 0.69 |
|                         |               | 0.31  | 0.08 | 1     | 0.72 | 0.06     | 1 n/a |      |
| ein                     |               | 0.3   | 0.09 | 1     | 0.79 | 0.05     | 1 n/a |      |
|                         | putative me   | 1.02  | 0.12 | 1     | 0.88 | 0.09     | 1     | 0.77 |
| ise                     |               | 0.05  | 0.01 | 1     | 0.56 | 0.04 n/a | n/a   |      |
| mbrial acetylation      |               | 0.06  | 0.03 | 1     | 0.62 | 0.04 n/a | n/a   |      |
| ating signal            |               | 0.08  | 0.05 | 1     | 0.67 | 0.19 n/a | n/a   |      |
|                         |               | 0.39  | 0.06 | 1     | 0.61 | 0.08 n/a |       | 1.09 |
| ient killing            |               | 0.08  | 0.01 | 1     | 0.63 | 0.06 n/a | n/a   |      |
| egulation               |               | 0.05  | 0.01 | 1     | 0.61 | 0.05 n/a | n/a   |      |
| rotein                  |               | 0.89  | 0.1  | 1     | 1.03 | 0.29     | 0 n/a |      |
|                         |               | 0.95  | 0.08 | 1     | 1.17 | 0.17 n/a |       | 1.14 |
|                         |               | 0.84  | 0.1  | 1     | 0.76 | 0.14     | 1     | 0.9  |
|                         |               | 1.02  | 0.11 | 1     | 0.78 | 0.14 n/a |       | 0.9  |
|                         |               | 1.08  | 0.07 | 1     | 0.79 | 0.1 n/a  |       | 0.83 |
| tor                     |               | 1.02  | 0.11 | 1     | 0.82 | 0.07     | 1     | 0.88 |
|                         |               | 0.95  | 0.09 | 1     | 1.1  | 0.09 n/a |       | 1.37 |
|                         |               | 0.91  | 0.05 | 1     | 1.11 | 0.09 n/a |       | 1.17 |
|                         |               | 1.05  | 0.1  | 1     | 1.11 | 0.14 n/a |       | 1.22 |
|                         |               | 1     | 0.15 | 1     | 1.15 | 0.11 n/a |       | 1.21 |
| able tail assembly prot |               | 0.11  | 0.02 | 1     | 0.8  | 0.08     | 1 n/a |      |
|                         | n/a           | n/a   | n/a  | n/a   | n/a  | n/a      | n/a   |      |
|                         | conserved     | 16.07 | 2.78 | 1 n/a | n/a  | n/a      | n/a   | 0.78 |

|        |                          |       |      |     |      |      |     |       |
|--------|--------------------------|-------|------|-----|------|------|-----|-------|
|        | putative int             | 8.34  | 3.05 | 1   | n/a  | n/a  | n/a | 0.8   |
|        | hypothetica              | 5.7   | 1.31 | 1   | n/a  | n/a  | n/a | 1.1   |
|        | putative ba              | 3.25  | 0.96 | 1   | n/a  | n/a  | n/a | 1.17  |
|        | putative IS              | 7.24  | 3.29 | 1   | n/a  | n/a  | n/a | 0.95  |
|        | probable se              | 5.91  | 1.13 | 1   | n/a  | n/a  | n/a | 0.88  |
|        | probable ui              | 6.73  | 2.17 | 1   | n/a  | n/a  | n/a | 1.32  |
|        | hypothetica              | 8.6   | 3.19 | 1   | n/a  | n/a  | n/a | 1.24  |
|        | phage bas                | 3.97  | 0.39 | 1   | n/a  | n/a  | n/a | 1.21  |
|        | conserved                | 8.42  | 3.23 | 1   | n/a  | n/a  | n/a | 1.12  |
|        | hypothetica              | 2.85  | 0.55 | 1   | n/a  | n/a  | n/a | 1.01  |
| tcfA   | putative fir             | 10.66 | 3.85 | 1   | n/a  | n/a  | n/a | 0.94  |
|        | probable ca              | 3.6   | 0.37 | 1   | n/a  | n/a  | n/a | 1.16  |
|        | putative ph              | 4.02  | 0.53 | 1   | n/a  | n/a  | n/a | 1.13  |
| stgD   | probable fir             | 6.84  | 2.43 | 1   | n/a  | n/a  | n/a | 1.09  |
|        | hypothetica              | 1.99  | 0.83 | 0   | n/a  | n/a  | n/a | 0.77  |
| gam    | bacterioph               | 14.17 | 4.08 | 1   | n/a  | n/a  | n/a | 0.63  |
|        | putative ba              | 14.49 | 5.18 | 1   | n/a  | n/a  | n/a | 0.62  |
|        | putative ba              | 6.5   | 2.66 | 1   | n/a  | n/a  | n/a | 0.93  |
|        | hypothetica              | 12.26 | 6.21 | 1   | n/a  | n/a  | n/a | 1.06  |
|        | probable te              | 2.06  | 0.19 | 1   | 1.06 | 0.12 | n/a | 1.21  |
| vexE   | Vi polysacc              | 13.51 | 1.67 | 1   | n/a  | n/a  | n/a | 1.05  |
|        | hypothetica              | 9.39  | 2.6  | 1   | n/a  | n/a  | n/a | 0.98  |
| cl     | phage imm                | 9.38  | 2.26 | 1   | n/a  | n/a  | n/a | 1.09  |
|        | hypothetica              | 19.82 | 7.71 | 1   | n/a  | n/a  | n/a | 1.13  |
|        | hypothetica              | 29.43 | 8.9  | 1   | n/a  | n/a  | n/a | 1     |
| hsdM   |                          | 1.81  | 0.15 | 1   | 1.11 | 0.17 | n/a | 1.06  |
|        | conserved                | 1.73  | 0.11 | 1   | 1.04 | 0.11 | n/a | 1.08  |
| tviE   | Vi polysacc              | 20.55 | 3.38 | 1   | n/a  | n/a  | n/a | 1.08  |
| cII    | transcriptio             | 5.09  | 1.03 | 1   | n/a  | n/a  | n/a | 1.03  |
|        | n/a                      | n/a   | n/a  | n/a | n/a  | n/a  | n/a | n/a   |
|        | n/a                      | n/a   | n/a  | n/a | n/a  | n/a  | n/a | n/a   |
|        | n/a                      | n/a   | n/a  | n/a | n/a  | n/a  | n/a | n/a   |
|        | n/a                      | n/a   | n/a  | n/a | n/a  | n/a  | n/a | n/a   |
|        | n/a                      | n/a   | n/a  | n/a | n/a  | n/a  | n/a | n/a   |
|        | n/a                      | n/a   | n/a  | n/a | n/a  | n/a  | n/a | n/a   |
| pmrB   | two-compo                | 0.91  | 0.05 | 1   | 1.12 | 0.2  | 1   | 1.23  |
|        | stop; putative integrase | 0.07  | 0.04 | 1   | 1.54 | 0.23 | 1   | n/a   |
| gidA   | glucose inh              | 0.73  | 0.09 | 1   | 1.31 | 0.19 | 1   | 1.51  |
| rpoN   | RNA polym                | 0.83  | 0.09 | 1   | 1.06 | 0.18 | 1   | 1.35  |
| parE   | topoisomer               | 0.04  | 0.08 | 1   | 1.08 | 0.35 | 1   | 0.97  |
| rplU   | 50S riboso               | 0.69  | 0.14 | 1   | 1.11 | 0.2  | 1   | 1.26  |
| citG2  | citg protein             | 0.94  | 0.09 | 1   | 1.14 | 0.22 | 1   | 0.94  |
| lpxC   | UDP-3-O-[-               | 0.58  | 0.04 | 1   | 1.17 | 0.19 | 1   | 0.71  |
| yacC   | conserved                | 0.2   | none | 1   | 1.14 | 0.31 | 1   | 1.67  |
| yadB   | glutamyl-tR              | 0.53  | 0.27 | 1   | 1.2  | 0.23 | 1   | 1     |
| cdsA   | phosphatid               | 0.54  | 0.45 | 0   | 1.69 | 0.63 | 0   | 0.84  |
| ie     |                          | 0.27  | 0.09 | 1   | 0.73 | 0.08 | 1   | -0.34 |
|        | possible ex              | 0.88  | 0.11 | 1   | 1.07 | 0.17 | 1   | 1.26  |
|        |                          | 0.91  | 0.1  | 1   | 0.93 | 0.11 | 1   | 0.75  |
| rotein |                          | 0.1   | 0.02 | 1   | 1.01 | 0.1  | 1   | n/a   |
| ybfM   | putative ou              | 0.95  | 0.13 | 1   | 0.89 | 0.16 | 1   | 0.89  |
|        | conserved                | 0.92  | 0.12 | 1   | 1.01 | 0.1  | 1   | 0.83  |

|                               |               |      |      |   |      |          |       |      |
|-------------------------------|---------------|------|------|---|------|----------|-------|------|
| pgtC                          | phosphogly    | 0.92 | 0.07 | 1 | 0.97 | 0.12     | 1     | 1.08 |
| wcaK                          |               | 0.86 | 0.04 | 1 | 0.87 | 0.32     | 1     | 0.91 |
| ine protein                   |               | 0.11 | 0.03 | 1 | 1.07 | 0.08     | 1 n/a |      |
|                               | putative mε   | 0.91 | 0.07 | 1 | 0.98 | 0.18     | 1     | 0.95 |
| ferase system IIC comp        |               | 0.08 | 0.03 | 1 | 1.14 | 0.1      | 1 n/a |      |
|                               | conserved     | 0.74 | 0.1  | 1 | 1.01 | 0.09     | 1     | 1.1  |
| eroxide dismutase prec        |               | 0.11 | 0.03 | 1 | 0.94 | 0.13     | 1 n/a |      |
|                               | ClpB-like p   | 0.85 | 0.08 | 1 | 1.13 | 0.07     | 1     | 0.96 |
| Ill glucitol                  |               | 0.06 | 0.01 | 1 | 1.24 | 0.21     | 1 n/a |      |
|                               | probable se   | 0.73 | 0.1  | 1 | 1.18 | 0.18     | 0     | 0.89 |
| pipB                          | conserved     | 0.89 | 0.08 | 1 | 1.12 | 0.31     | 1     | 0.87 |
| zntR                          | putative Zn   | 0.82 | 0.08 | 1 | 1.2  | 0.16     | 1     | 1.36 |
| yhfA                          | conserved     | 0.98 | 0.11 | 1 | 1.19 | 0.1      | 1     | 1.23 |
|                               | conserved     | 0.89 | 0.11 | 1 | 0.88 | 0.18     | 1     | 0.8  |
| speG                          | spermidine    | 0.9  | 0.14 | 1 | 1.06 | 0.27     | 1     | 0.83 |
| slyD                          | FKBP-type     | 0.98 | 0.1  | 1 | 1.15 | 0.15     | 1     | 1.19 |
| yrfD                          | conserved     | 0.89 | 0.08 | 1 | 1.25 | 0.15     | 1     | 1.22 |
| icdA                          | isocitrate d  | 1.04 | 0.11 | 1 | 0.73 | 0.08     | 1     | 0.74 |
|                               | putative tra  | 0.8  | 0.12 | 1 | 0.87 | 0.28     | 1     | 0.84 |
| kefB                          | glutathione   | 0.91 | 0.05 | 1 | 1.03 | 0.18     | 1     | 1.03 |
|                               | putative gly  | 0.9  | 0.06 | 1 | 0.8  | 0.11     | 1     | 0.75 |
|                               | putative he   | 0.94 | 0.02 | 1 | 0.75 | 0.12     | 1     | 0.93 |
| rotein                        |               | 0.24 | 0.03 | 1 | 1.45 | 2.3      | 1 n/a |      |
| rhaD                          |               | 0.84 | 0.06 | 1 | 1.27 | 0.13     | 1     | 1.43 |
| ing chemotaxis protein        |               | 0.11 | 0.03 | 1 | 1.21 | 0.05     | 1 n/a |      |
| ydeZ                          | putative AE   | 1    | 0.06 | 1 | 1.27 | 0.14     | 1     | 1.23 |
| otein                         |               | 0.23 | 0.05 | 1 | 1.44 | 0.31     | 1 n/a |      |
| ygbA                          | conserved     | 0.99 | 0.15 | 0 | 1.07 | 0.47     | 0     | 1.01 |
| ygbJ                          |               | 0.5  | 0.05 | 1 | 1.11 | 0.11     | 1     | 1.15 |
|                               | conserved     | 0.81 | 0.1  | 1 | 0.84 | 0.05     | 1     | 0.93 |
| yfeA                          | putative mε   | 0.88 | 0.09 | 1 | 0.86 | 0.16     | 1     | 0.98 |
| ive DNA or RNA helica         |               | 0.05 | 0.02 | 1 | 0.86 | 0.1      | 1 n/a |      |
|                               | conserved     | 0.74 | 0.06 | 1 | 0.89 | 0.24     | 1     | 0.86 |
| cydD                          | transport A   | 0.81 | 0.07 | 1 | 0.75 | 0.23     | 1     | 0.83 |
| ilar to tail fiber-like prote |               | 0.11 | 0.03 | 1 | 0.83 | 0.17 n/a | n/a   |      |
| yiiQ                          | conserved     | 0.91 | 0.14 | 1 | 1.25 | 0.12     | 1     | 1.34 |
|                               | putative lipi | 0.99 | 0.12 | 1 | 1.21 | 0.14     | 1     | 1.23 |
|                               | possible pe   | 0.93 | 0.05 | 1 | 1.05 | 0.13     | 1     | 1.04 |
| rotein                        |               | 0.16 | 0.03 | 1 | 1.03 | 0.11     | 1 n/a |      |
|                               | putative mε   | 0.97 | 0.06 | 1 | 0.91 | 0.14 n/a |       | 0.68 |
| ive chaparone                 |               | 0.05 | 0.01 | 1 | 0.85 | 0.13     | 1 n/a |      |
| rd ompX homologue             |               | 0.11 | 0.04 | 1 | 0.78 | 0.1      | 1 n/a |      |
| yfgB                          | conserved     | 0.82 | 0.05 | 1 | 0.95 | 0.06     | 1     | 1.1  |
|                               | putative mε   | 0.97 | 0.1  | 1 | 0.87 | 0.15     | 1     | 0.86 |
| tyrP                          | tyrosine-sp   | 0.9  | 0.08 | 1 | 0.71 | 0.07     | 1     | 0.86 |
|                               | putative mε   | 0.9  | 0.11 | 1 | 0.9  | 0.18     | 0     | 0.77 |
| hosphate-requiring en:        |               | 0.14 | 0.03 | 1 | 1.05 | 0.12     | 1 n/a |      |
| nt Lon protease               |               | 0.03 | 0.01 | 1 | 1.12 | 0.17     | 1 n/a |      |
|                               | putative mε   | 0.86 | 0.08 | 1 | 1.12 | 0.09     | 1     | 1.18 |
|                               | hypothetica   | 0.91 | 0.18 | 1 | 1.18 | 0.13     | 0     | 1.02 |
| accD                          | acetyl-CoA    | 0.86 | 0.08 | 1 | 0.92 | 0.15     | 1     | 0.9  |
|                               | hypothetica   | 0.87 | 0.11 | 1 | 0.73 | 0.16     | 1     | 0.76 |

|                          |              |      |      |   |      |      |     |      |
|--------------------------|--------------|------|------|---|------|------|-----|------|
| rpIT                     | 50S ribosom  | 0.98 | 0.12 | 1 | 1.03 | 0.32 | 0   | 0.89 |
| crr                      | pts system   | 0.88 | 0.09 | 1 | 1.07 | 0.27 | 1   | 0.99 |
|                          | putative me  | 0.89 | 0.09 | 1 | 0.78 | 0.05 | 1   | 0.75 |
|                          | putative se  | 0.94 | 0.17 | 1 | 0.76 | 0.08 | 1   | 0.79 |
| sprB                     | possible Ar  | 0.82 | 0.05 | 1 | 1.08 | 0.15 | 1   | 1.26 |
| yojN                     | putative tw  | 0.95 | 0.07 | 1 | 0.82 | 0.07 | 1   | 0.95 |
| uvrC                     | excinuclea   | 0.85 | 0.05 | 1 | 0.76 | 0.1  | 1   | 0.78 |
| otein                    |              | 0.1  | 0.03 | 1 | 0.82 | 0.12 | 1   | n/a  |
| alkB                     | AlkB protei  | 0.82 | 0.05 | 1 | 0.89 | 0.06 | 1   | 0.85 |
| celF                     | phospho-br   | 1    | 0.05 | 1 | 0.79 | 0.07 | 1   | 0.82 |
| hydrogenase              |              | 0.09 | 0.02 | 1 | 0.86 | 0.21 | 1   | n/a  |
| doxine kinase            |              | 0.77 | 0.05 | 1 | 0.77 | 0.17 | 1   | 0.77 |
|                          | putative me  | 0.95 | 0.07 | 1 | 0.74 | 0.06 | 1   | 0.74 |
| malM                     | maltose op   | 0.83 | 0.07 | 1 | 1.16 | 0.17 | 1   | 1.3  |
| torT                     | Solute bind  | 0.86 | 0.09 | 1 | 1.34 | 0.19 | 1   | 1.35 |
| ydG                      | conserved    | 1.01 | 0.11 | 1 | 1.57 | 0.23 | 1   | 1.14 |
| rpsB                     | 30S ribosom  | 0.9  | 0.12 | 1 | 1.07 | 0.16 | 1   | 1.1  |
| hemB                     | delta-amin   | 0.88 | 0.11 | 1 | 0.99 | 0.14 | 1   | 0.97 |
| ftsA                     | cell divisor | 0.87 | 0.09 | 1 | 1.1  | 0.2  | 1   | 0.96 |
| nuoB                     | NADH dehy    | 0.99 | 0.11 | 1 | 0.92 | 0.11 | 1   | 1.01 |
| trpH                     | conserved    | 0.93 | 0.11 | 1 | 0.9  | 0.18 | 1   | 0.74 |
| dnaN                     | DNA polym    | 0.88 | 0.05 | 1 | 1.52 | 0.24 | 1   | 1.46 |
| ssrA                     | putative tw  | 0.84 | 0.04 | 1 | 0.7  | 0.08 | 1   | 0.84 |
| in N, non-specific porin |              | 0.72 | 0.06 | 1 | 0.7  | 0.06 | 1   | 0.8  |
| fimC                     | fimbrial cha | 1    | 0.04 | 1 | 1.05 | 0.13 | 1   | 0.9  |
| yleE                     | conserved    | 0.98 | 0.07 | 1 | 1.34 | 0.08 | 1   | 1.44 |
|                          | putative me  | 0.87 | 0.05 | 1 | 0.95 | 0.11 | 1   | 0.93 |
| yfiE                     |              | 0.91 | 0.03 | 1 | 0.97 | 0.13 | 1   | 1.12 |
|                          | conserved    | 0.9  | 0.06 | 1 | 1.07 | 0.13 | 1   | 1.13 |
| glpG                     | putative me  | 0.86 | 0.13 | 1 | 1.22 | 0.09 | 1   | 1.22 |
| ne protein               |              | 1.08 | 0.19 | 1 | 1.33 | 0.32 | 0   | n/a  |
|                          |              | 0.21 | 0.04 | 1 | 0.82 | 0.1  | 1   | n/a  |
|                          |              | 0.13 | 0.02 | 1 | 0.78 | 0.11 | n/a | n/a  |
| ybdA                     | hypothetica  | 0.93 | 0.1  | 1 | 0.87 | 0.16 | 1   | 0.83 |
| yjfQ                     | probable tr  | 0.82 | 0.09 | 1 | 1.18 | 0.2  | 1   | 1.12 |
|                          | cytosol ami  | 0.81 | 0.1  | 1 | 1.19 | 0.09 | 1   | 1.18 |
|                          | conserved    | 0.96 | 0.11 | 1 | 1.06 | 0.14 | 1   | 1.09 |
|                          | conserved    | 0.75 | 0.1  | 1 | 1.24 | 0.23 | 1   | 1.31 |
| tdcC                     |              | 0.95 | 0.08 | 1 | 1.02 | 0.16 | 1   | 1.22 |
| garL                     | 5-keto-4-de  | 0.93 | 0.06 | 1 | 1.14 | 0.11 | 1   | 1.3  |
|                          | putative 2,4 | 0.99 | 0.04 | 1 | 0.85 | 0.08 | 1   | 0.86 |
|                          | conserved    | 0.99 | 0.07 | 1 | 0.95 | 0.12 | 1   | 1.05 |
| recR                     | recombinat   | 0.95 | 0.04 | 1 | 0.93 | 0.1  | 1   | 0.88 |
| maA                      | maltose O-   | 0.87 | 0.1  | 1 | 1.05 | 0.17 | 1   | 0.91 |
| ne protein               |              | 0.21 | 0.02 | 1 | 1    | 0.09 | 1   | n/a  |
| glnA                     | glutamine s  | 0.86 | 0.03 | 1 | 1.37 | 0.15 | 1   | 1.4  |
| ybiY                     | putative py  | 0.88 | 0.08 | 1 | 0.92 | 0.1  | 1   | 0.83 |
| sucC                     | succinyl-Cc  | 0.91 | 0.08 | 1 | 0.9  | 0.13 | 1   | 0.82 |
| glnL                     | Two-compr    | 0.92 | 0.08 | 1 | 1.28 | 0.12 | 1   | 1.34 |
| hisJ                     | histidine-bi | 0.97 | 0.09 | 1 | 0.94 | 0.16 | 1   | 0.94 |
| fruR                     | fructose rej | 0.89 | 0.1  | 1 | 1.24 | 0.12 | 1   | 0.94 |
| fldA                     | flavodoxin   | 0.92 | 0.09 | 1 | 0.98 | 0.07 | 1   | 0.81 |

|           |              |      |      |   |      |      |     |      |
|-----------|--------------|------|------|---|------|------|-----|------|
| sdhB      | succinate c  | 0.94 | 0.11 | 1 | 0.85 | 0.16 | 1   | 0.86 |
| lpxA      | acyl-[acyl-c | 0.89 | 0.08 | 1 | 0.99 | 0.19 | 1   | 0.91 |
| trmD      | tRNA(guan    | 0.89 | 0.1  | 1 | 0.95 | 0.15 | 1   | 1.12 |
| hfQ       | host factor- | 0.88 | 0.09 | 1 | 1.15 | 0.21 | 1   | 1.12 |
| hemA      | glutamyl-tR  | 0.79 | 0.09 | 1 | 0.82 | 0.11 | 1   | 0.89 |
| purN      | phosphorib   | 0.91 | 0.07 | 1 | 1.04 | 0.24 | 1   | 0.92 |
| moeA      | molybdopte   | 0.9  | 0.05 | 1 | 0.94 | 0.1  | 1   | 0.78 |
| roprotein |              | 0.23 | 0.06 | 1 | 0.73 | 0.04 | 1   | n/a  |
| pfkA      | 6-phosphol   | 1    | 0.05 | 1 | 1.26 | 0.06 | 1   | 1.21 |
| gltJ      | glutamate/:  | 0.96 | 0.07 | 1 | 0.87 | 0.04 | 1   | 0.86 |
| yrdA      | putative tra | 1.01 | 0.08 | 1 | 0.96 | 0.08 | 1   | 1.16 |
|           | conserved    | 1.1  | 0.21 | 1 | 0.74 | 0.18 | 1   | 0.73 |
|           | putative ba  | 0.48 | 0.06 | 1 | 0.8  | 0.17 | n/a | 0.8  |
| pduM      | conserved    | 0.74 | 0.08 | 1 | 0.97 | 0.13 | 1   | 0.91 |
|           | putative me  | 0.9  | 0.05 | 1 | 1.2  | 0.17 | 1   | 1.3  |
| yecF      | conserved    | 0.99 | 0.14 | 1 | 0.87 | 0.12 | 1   | 0.8  |
|           |              | 0.85 | 0.08 | 1 | 1.17 | 0.19 | n/a | 1.14 |
|           | possible tra | 0.95 | 0.07 | 1 | 1.24 | 0.17 | 1   | 1.17 |
|           | conserved    | 0.93 | 0.09 | 1 | 1.18 | 0.4  | 1   | 1.11 |
| thrB      | homoserine   | 0.9  | 0.11 | 1 | 1.16 | 0.2  | 1   | 0.99 |
|           | hypothetica  | 0.92 | 0.15 | 1 | 1.24 | 0.44 | 0   | 0.87 |
|           | hypothetica  | 0.93 | 0.1  | 0 | 1.07 | 0.43 | 0   | 0.92 |
|           | possible ex  | 0.78 | 0.07 | 1 | 1.28 | 0.21 | 1   | 1.33 |
|           | hypothetica  | 1.01 | 0.06 | 1 | 0.96 | 0.22 | 1   | 1.01 |
|           |              | 0.08 | 0.02 | 1 | 0.84 | 0.15 | 1   | n/a  |
| mgIC      | galactoside  | 1    | 0.03 | 1 | 0.82 | 0.15 | 1   | 0.75 |
| apeE      | outer mem    | 0.86 | 0.06 | 1 | 0.91 | 0.13 | 1   | 0.85 |
| fhuA      |              | 0.85 | 0.04 | 1 | 0.98 | 0.16 | 1   | 1    |
|           |              | 0.88 | 0.07 | 1 | 1.08 | 0.1  | n/a | 1.26 |
| nuoE      | NADH dehy    | 0.9  | 0.06 | 1 | 0.81 | 0.11 | 1   | 0.79 |
|           | possible lip | 0.84 | 0.08 | 1 | 1.01 | 0.05 | 1   | 1.11 |
| yigZ      | conserved    | 0.98 | 0.05 | 1 | 1.28 | 0.18 | 1   | 1.05 |
| rhtB      | homoserine   | 0.9  | 0.06 | 1 | 1.35 | 0.18 | 1   | 1.12 |
| hemY      | Prophyrin t  | 0.86 | 0.07 | 1 | 1.31 | 0.23 | 1   | 1.22 |
| rplA      | 50S riboso   | 0.91 | 0.11 | 1 | 1.18 | 0.22 | 1   | 1.38 |
| rffD      | UDP-ManN     | 0.84 | 0.08 | 1 | 1.33 | 0.31 | 1   | 1.16 |
| murB      | UDP-N-ace    | 0.87 | 0.1  | 1 | 1.15 | 0.28 | 1   | 1.2  |
| flil      | flagellum-s  | 0.84 | 0.07 | 1 | 0.84 | 0.22 | 1   | 0.81 |
| ptsH      | phosphoca    | 0.89 | 0.1  | 1 | 0.97 | 0.13 | 1   | 1.14 |
| araC      | arabinose c  | 0.78 | 0.08 | 1 | 1.05 | 0.2  | 1   | 0.97 |
| eno       | enolase      | 0.86 | 0.08 | 1 | 1.15 | 0.18 | 1   | 1.32 |
| fpr       | ferredoxin-  | 0.92 | 0.07 | 1 | 1.17 | 0.12 | 1   | 1.23 |
| hisA      | phosphorib   | 0.87 | 0.05 | 1 | 0.84 | 0.05 | 1   | 0.77 |
|           | putative lip | 0.93 | 0.05 | 1 | 1.3  | 0.22 | 1   | 1.14 |
| yjaD      | conserved    | 0.72 | 0.04 | 1 | 1.22 | 0.13 | 1   | 1.2  |
| ddlA      | D-alanine:1  | 1    | 0.03 | 1 | 0.91 | 0.12 | 1   | 0.9  |
| cheA      | chemotaxis   | 0.93 | 0.05 | 1 | 0.7  | 0.14 | 1   | 0.78 |
| treA      |              | 0.87 | 0.06 | 1 | 0.75 | 0.08 | 1   | 0.78 |
|           |              | 0.72 | 0.03 | 1 | 0.71 | 0.18 | 1   | 0.8  |
|           | conserved    | 0.98 | 0.06 | 1 | 0.68 | 0.07 | 1   | 0.74 |
| artJ      | arginine-bir | 0.95 | 0.08 | 1 | 0.9  | 0.08 | 1   | 0.84 |
| citG      | CitG protei  | 0.88 | 0.08 | 1 | 1    | 0.13 | 1   | 0.82 |

|                   |                  |      |      |   |      |      |     |      |
|-------------------|------------------|------|------|---|------|------|-----|------|
| ycbC              | putative me      | 0.9  | 0.07 | 1 | 1    | 0.15 | 1   | 0.84 |
|                   | conserved        | 0.87 | 0.09 | 1 | 1.28 | 0.21 | 1   | 1.36 |
| ybdH              | putative ox      | 0.89 | 0.09 | 1 | 0.99 | 0.14 | 1   | 0.92 |
|                   | putative ps      | 1.01 | 0.11 | 1 | 0.83 | 0.07 | 1   | 0.78 |
| fdnG              |                  | 0.46 | 0.07 | 1 | 0.73 | 0.12 | 1   | 0.82 |
|                   | putative AT      | 0.87 | 0.08 | 1 | 0.74 | 0.17 | 1   | 0.84 |
|                   | conserved        | 0.84 | 0.09 | 1 | 0.91 | 0.22 | 1   | 0.86 |
| YVIII) in E. coli |                  | 0.18 | 0.04 | 1 | 0.66 | 0.07 | 1   | n/a  |
| yebB              | conserved        | 0.86 | 0.05 | 1 | 0.95 | 1.45 | 0   | 0.75 |
| ybaN              | putative me      | 0.94 | 0.05 | 1 | 0.93 | 0.13 | 1   | 0.83 |
|                   | putative pe      | 0.93 | 0.06 | 1 | 0.95 | 0.19 | 1   | 0.8  |
|                   | putative me      | 0.8  | 0.07 | 1 | 0.96 | 0.12 | 1   | 0.96 |
|                   | putative re      | 0.85 | 0.08 | 1 | 0.73 | 0.05 | 1   | 0.72 |
| drolase           |                  | 0.11 | 0.02 | 1 | 1.09 | 0.19 | 1   | n/a  |
|                   |                  | 0.92 | 0.1  | 1 | 0.94 | 0.21 | n/a | 0.8  |
| iroC              | putative AE      | 0.79 | 0.04 | 1 | 1.07 | 0.2  | 1   | 1.09 |
| glyS              | glycine-tRN      | 0.52 | 0.04 | 1 | 1.23 | 0.16 | 1   | 1.33 |
|                   | spanning protein | 0.9  | 0.08 | 1 | 0.94 | 0.1  | 1   | 0.81 |
| ft                |                  | 0.36 | 0.08 | 0 | 1.18 | 0.26 | n/a | n/a  |
|                   | possible Ar      | 0.76 | 0.09 | 1 | 1.2  | 0.13 | 1   | 1.3  |
| lysA              | diaminopir       | 0.92 | 0.1  | 1 | 1.16 | 0.21 | 1   | 0.99 |
| speB              | agmatine u       | 0.8  | 0.09 | 1 | 1.14 | 0.26 | 1   | 1.27 |
| otein             |                  | 0.22 | 0.07 | 1 | 0.93 | 0.24 | 1   | n/a  |
| hydN              | electron tra     | 1.03 | 0.11 | 1 | 1.19 | 0.25 | 1   | 1.1  |
| yaC               | putative ac      | 0.9  | 0.11 | 1 | 1.35 | 0.22 | 1   | 1.36 |
|                   | putative PT      | 0.9  | 0.05 | 1 | 1.26 | 0.12 | 1   | 1.35 |
| ygdB              | conserved        | 0.91 | 0.04 | 1 | 1.1  | 0.07 | 1   | 1.04 |
|                   | conserved        | 1.07 | 0.08 | 1 | 0.99 | 0.17 | 1   | 1.09 |
| yqgA              | putative me      | 0.94 | 0.05 | 1 | 0.93 | 0.2  | 1   | 1.19 |
| hybE              | hydrogena        | 0.85 | 0.06 | 1 | 1.22 | 0.11 | 1   | 1.16 |
|                   | putative ca      | 1.11 | 0.08 | 1 | 1.05 | 0.08 | 1   | 1.29 |
| yehX              | ABC transp       | 0.89 | 0.05 | 1 | 0.84 | 0.1  | 1   | 0.92 |
|                   | putative lip     | 1.05 | 0.1  | 1 | 0.79 | 0.07 | 1   | 0.82 |
| rplE              | 50S riboso       | 0.89 | 0.08 | 1 | 1.21 | 0.09 | 1   | 1.41 |
|                   | puative phc      | 0.93 | 0.07 | 1 | 1.22 | 0.08 | 1   | 1.26 |
| ftsH              | cell divisor     | 0.9  | 0.09 | 1 | 1.08 | 0.16 | 1   | 1.22 |
|                   | possible gly     | 0.85 | 0.07 | 1 | 1.2  | 0.19 | 1   | 1.19 |
|                   | hypothetica      | 0.84 | 0.08 | 1 | 1.09 | 0.2  | 1   | 1.26 |
|                   | possible ex      | 0.85 | 0.07 | 1 | 1.25 | 0.16 | 1   | 1.1  |
| uxuR              | uxu operon       | 0.88 | 0.06 | 1 | 1.03 | 0.15 | 1   | 1.09 |
| dsbD              | thiol:disulf     | 0.94 | 0.08 | 1 | 1.27 | 0.19 | 1   | 1.11 |
|                   | conserved        | 1.01 | 0.11 | 1 | 1.01 | 0.09 | 1   | 0.92 |
|                   | putative hy      | 0.92 | 0.11 | 1 | 0.99 | 0.1  | 1   | 0.88 |
| srlM              | glucitol ope     | 0.95 | 0.06 | 1 | 1.09 | 0.14 | 1   | 1.02 |
| metG              | methionyl-t      | 0.88 | 0.02 | 1 | 0.85 | 0.1  | 1   | 0.96 |
| bcr               | bicyclomyc       | 1.02 | 0.06 | 1 | 0.82 | 0.11 | 1   | 0.76 |
|                   |                  | 0.63 | 0.07 | 1 | 1.09 | 0.17 | n/a | 0.85 |
| pbpG              |                  | 0.87 | 0.04 | 1 | 0.92 | 0.08 | 1   | 0.86 |
| yafE              | putative me      | 0.94 | 0.04 | 1 | 0.98 | 0.08 | 1   | 1.02 |
| ssaH              | putative pa      | 0.9  | 0.1  | 0 | 1.02 | 0.44 | 0   | 0.93 |
| sdhD              | succinate c      | 1.03 | 0.06 | 1 | 0.95 | 0.17 | 1   | 0.94 |
|                   |                  | 0.55 | 0.08 | 1 | 0.88 | 0.18 | 1   | 0.7  |

|                             |              |      |      |   |      |      |     |      |
|-----------------------------|--------------|------|------|---|------|------|-----|------|
| corE                        | putative me  | 0.91 | 0.1  | 1 | 1    | 0.11 | 1   | 1.04 |
|                             | conserved    | 0.95 | 0.09 | 1 | 1.17 | 0.09 | n/a | 1.22 |
|                             | putative ex  | 0.92 | 0.1  | 1 | 1.08 | 0.17 | 1   | 1.34 |
| yliD                        | hypothetica  | 1.04 | 0.11 | 1 | 0.89 | 0.15 | 1   | 0.67 |
| ttrB                        | tetrathional | 0.85 | 0.07 | 1 | 0.78 | 0.15 | 1   | 0.82 |
|                             | conserved    | 0.93 | 0.08 | 1 | 1.23 | 0.13 | 1   | 1.33 |
|                             | hypothetica  | 0.82 | 0.08 | 1 | 1.08 | 0.15 | 1   | 1.38 |
| fldB                        | flavodoxin   | 0.97 | 0.08 | 1 | 1.06 | 0.16 | 1   | 1.11 |
| aroG                        | phospho-2-   | 0.92 | 0.14 | 1 | 0.89 | 0.24 | 1   | 0.84 |
| flgK                        | flagellar ho | 0.98 | 0.05 | 1 | 0.74 | 0.08 | 1   | 0.75 |
| cheZ                        | chemotaxis   | 0.96 | 0.05 | 1 | 0.8  | 0.07 | 1   | 0.83 |
|                             | possible alk | 0.96 | 0.05 | 1 | 1.04 | 0.1  | 1   | 1.35 |
| scsA                        | membrane     | 1    | 0.11 | 1 | 0.85 | 0.09 | 1   | 0.78 |
| pal                         | peptidoglyc  | 0.94 | 0.08 | 1 | 0.9  | 0.14 | 1   | 0.97 |
| bioC                        | biotin synth | 0.82 | 0.05 | 1 | 0.9  | 0.09 | 1   | 0.71 |
| ybdB                        | conserved    | 0.97 | 0.06 | 1 | 0.97 | 0.05 | 1   | 0.77 |
| yfhJ                        | conserved    | 0.95 | 0.06 | 1 | 1.07 | 0.05 | 1   | 1.09 |
| acrD                        | putative eff | 0.87 | 0.06 | 1 | 0.92 | 0.15 | 1   | 0.85 |
| csrA                        | carbon stor  | 1.06 | 0.07 | 1 | 0.96 | 0.08 | 1   | 1.12 |
| able minor tail protein     |              | 0.07 | 0.01 | 1 | 0.76 | 0.07 | 1   | n/a  |
| rotein                      |              | 0.2  | 0.05 | 1 | 1.1  | 0.18 | 1   | n/a  |
| rpoZ                        | DNA-direct   | 0.88 | 0.1  | 1 | 1.44 | 0.16 | 1   | 1.46 |
| mtlD                        | mannitol-1-  | 0.9  | 0.11 | 1 | 1.23 | 0.14 | 1   | 1.24 |
|                             | hypothetica  | 0.76 | 0.07 | 1 | 1.21 | 0.18 | 1   | 1.07 |
| ne protein                  |              | 0.15 | 0.04 | 1 | 1.27 | 0.16 | 1   | n/a  |
|                             | putative me  | 0.92 | 0.1  | 1 | 0.79 | 0.17 | 1   | 0.86 |
| ar to E. coli retron Ec67   |              | 0.34 | 0.07 | 1 | 1    | 0.17 | 1   | n/a  |
|                             | conserved    | 0.93 | 0.06 | 1 | 1.23 | 0.1  | 1   | 1.29 |
|                             | conserved    | 0.89 | 0.05 | 1 | 1.02 | 0.12 | 1   | 0.89 |
| athogenicity factor         |              | 0.1  | 0.03 | 1 | 0.68 | 0.1  | 1   | n/a  |
| ykgD                        | hypothetica  | 0.83 | 0.06 | 1 | 0.95 | 0.16 | 1   | 0.75 |
| rotein                      |              | 0.2  | 0.05 | 1 | 0.71 | 0.05 | 1   | n/a  |
| osmC                        | osmotically  | 1    | 0.11 | 1 | 1.26 | 0.12 | 1   | 1.35 |
|                             | conserved    | 0.97 | 0.08 | 1 | 1.13 | 0.11 | 1   | 1.02 |
| late kinase                 |              | 0.09 | 0.03 | 1 | 1.43 | 0.1  | 1   | n/a  |
| yhjA                        | probable cy  | 0.89 | 0.09 | 1 | 1.48 | 0.18 | 1   | 1.27 |
| ne protein                  |              | 0.97 | 0.05 | 1 | 1.06 | 0.16 | 1   | n/a  |
| rotein                      |              | 0.91 | 0.15 | 0 | 1.12 | 0.2  | 0   | n/a  |
| nifU                        | NifU-like pr | 0.93 | 0.09 | 1 | 1.04 | 0.12 | 1   | 1.05 |
|                             | probable pl  | 0.93 | 0.1  | 1 | 1.12 | 0.15 | 1   | 1.16 |
| ilar to head to tail joinin |              | 0.12 | 0.03 | 1 | 0.92 | 0.13 | 1   | n/a  |
| rimK                        | ribosomal p  | 0.96 | 0.09 | 1 | 0.83 | 0.13 | 1   | 0.73 |
| cspD                        | cold shock-  | 1.01 | 0.11 | 1 | 0.89 | 0.1  | 1   | 0.81 |
| xis                         | excisionase  | 0.83 | 0.1  | 1 | 0.85 | 0.13 | 1   | 0.79 |
| moaD                        | molybdopte   | 0.69 | 0.05 | 1 | 0.81 | 0.26 | 1   | 0.75 |
|                             |              | 0.09 | 0.03 | 1 | 0.7  | 0.1  | n/a | n/a  |
| eshifts relative to E. col  |              | 0.04 | 0.01 | 1 | 0.69 | 0.09 | n/a | n/a  |
| ssembly                     |              | 0.04 | 0.01 | 1 | 0.64 | 0.06 | n/a | n/a  |
| ssembly                     |              | 0.04 | 0.01 | 1 | 0.56 | 0.08 | n/a | n/a  |
| riae;chaparone              |              | 0.04 | 0.01 | 1 | 0.66 | 0.07 | n/a | n/a  |
| ine protein                 |              | 0.05 | 0.02 | 1 | 0.61 | 0.07 | n/a | n/a  |
| rotein                      |              | 0.09 | 0.01 | 1 | 0.65 | 0.07 | n/a | n/a  |





Setting either criterium in the respective genome

| STD_DEV | THRESHO | E. coli B nu | MEDIAN_F | STD_DEV | THRESHO | MEDIAN_F | STD_DEV | THRESHO |
|---------|---------|--------------|----------|---------|---------|----------|---------|---------|
| n/a     | n/a     |              | 1.86     | 1.12    | 1       | 2.63     | 2.14    | 1       |
| 0.15    | 0       | b1937        | 1.24     | 0.41    | 0       | 1.01     | 1.42    | 1       |
| 0.15    | 1       | b3017        | 1.14     | 0.35    | 0       | 1.56     | 1.19    | 0       |
| 0.05    | 1       |              | 1.18     | 0.26    | 0       | 1.4      | 0.52    | 0       |
| 0.11    | 1       | b0047        | 1.04     | 0.55    | 0       | 1.44     | 0.68    | 0       |
| 0.08    | 1       | b0104        | 0.62     | 0.27    | 1       | 0.59     | 0.4     | 1       |
| 0.04    | 1       | b0090        | 1.61     | 0.44    | 1       | 1.45     | 0.5     | 1       |
| 0.15    | 1       |              | 1.29     | 0.41    | 0       | 2.06     | 0.47    | 1       |
| 0.18    | 1       | b0142        | 0.83     | 0.44    | 1       | 1.34     | 0.53    | 0       |
| 0.08    | 1       | b0168        | 0.54     | 0.15    | 1       | 0.85     | 0.43    | 1       |
| 0.28    | 1       | b0199        | 1.44     | 0.29    | 0       | 1.19     | 0.45    | 0       |
| 0.07    | n/a     |              | 1.41     | 0.99    | 0       | 1.24     | 0.65    | 0       |
| 0.07    | 1       | b0679        | 12.6     | 4.7     | 1       | 4.76     | 3.23    | 1       |
| 0.07    | 1       | b0710        | 0.76     | 0.77    | 0       | 1.16     | 0.51    | 1       |
| 0.14    | 1       | b4242        | 1.33     | 0.73    | 0       | 1.33     | 0.56    | 0       |
| 0.17    | 1       |              | 2.09     | 0.21    | 0       | 1.64     | 0.57    | 0       |
| 0.18    | 1       |              | 1.66     | 0.57    | 0       | 1.63     | 0.3     | 0       |
| 0.1     | 1       | b0931        | 0.91     | 0.39    | 0       | 1.05     | 0.83    | 1       |
| 0.26    | 1       | b3705        | 0.68     | 0.54    | 1       | 0.91     | 0.45    | 1       |
| 0.06    | 1       | b3734        | 1.04     | 0.05    | 1       | 1.15     | 0.45    | 1       |
| 0.19    | 1       |              | 1.27     | 0.46    | 0       | 1.3      | 0.89    | 0       |
| 0.19    | n/a     |              | 1.37     | 0.65    | 0       | 1.96     | 0.72    | 0       |
| 0.25    | 0       |              | 1.88     | 0.27    | 0       | 2.29     | 0.89    | 0       |
| 0.07    | 1       |              | 1.35     | 0.41    | 1       | 1.29     | 0.24    | 0       |
| 0.08    | 1       |              | 1.29     | 0.28    | 0       | 2.01     | 0.63    | 0       |
| 0.03    | 1       |              | 1.81     | 0.55    | 1       | 1.51     | 0.7     | 1       |
| 0.08    | 1       | b1067        | 1.27     | 0.19    | 1       | 1.57     | 0.46    | 0       |
| 0.1     | 1       | b3413        | 1.14     | 0.24    | 0       | 1.22     | 0.65    | 0       |
| n/a     | n/a     |              | n/a      | n/a     | 0       | n/a      | n/a     | 0       |
| 0.08    | 1       | b3464        | 0.93     | 0.22    | 1       | 0.65     | 0.24    | 1       |
| n/a     | n/a     |              | n/a      | n/a     | 0       | n/a      | n/a     | 0       |
| 0.22    | 1       | b3418        | 1.08     | 0.36    | 1       | 0.7      | 0.24    | 1       |
| 0.23    | 1       | b3428        | 1.98     | 0.97    | 1       | 1.5      | 0.87    | 1       |
| 0.28    | 1       | b3466        | 1        | 0.92    | 0       | 1.98     | 0.77    | 0       |
| 0.16    | 1       |              | 2.24     | 1.09    | 0       | 2.04     | 0.9     | 1       |
| 0.74    | n/a     |              | 1.4      | 0.79    | 0       | 1.93     | 0.48    | 0       |
| 0.09    | 1       | b3452        | 1.8      | 0.51    | 0       | 1.76     | 0.51    | 0       |
| 0.29    | 1       | b4365        | 1.47     | 0.68    | 0       | 1.49     | 0.41    | 0       |
| 0.19    | 1       |              | 1.04     | 0.45    | 0       | 1.24     | 0.48    | 0       |
| 0.08    | 1       |              | 1.15     | 1.36    | 0       | 1.16     | 0.72    | 0       |
| n/a     | n/a     |              | n/a      | n/a     | 0       | n/a      | n/a     | 0       |

|     |      |           |     |      |       |       |      |      |   |
|-----|------|-----------|-----|------|-------|-------|------|------|---|
|     | 0.1  | 1         |     | 1.7  | 0.49  | 0     | 1.99 | 0.71 | 0 |
|     | 0.18 | 1         |     | 1.25 | 0.25  | 0     | 1.6  | 0.35 | 0 |
|     | 0.16 | 1 b2730   |     | 1.18 | 0.65  | 0     | 1.54 | 0.49 | 0 |
|     | 0.11 | 1 b2744   |     | 1.13 | 0.5   | 0     | 1.51 | 0.44 | 0 |
|     | 0.07 | 1 b0859   |     | 0.9  | 0.41  | 0     | 1.65 | 0.64 | 0 |
| n/a | n/a  |           | n/a | n/a  |       | 0 n/a | n/a  |      | 0 |
|     | 0.07 | 1         |     | 0.46 | 0.34  | 1     | 0.36 | 0.77 | 1 |
| n/a | n/a  |           | n/a | n/a  |       | 0 n/a | n/a  |      | 0 |
|     | 0.08 | n/a b2468 |     | 1.58 | 0.34  | 0     | 1.52 | 0.71 | 0 |
| n/a | n/a  |           | n/a | n/a  |       | 0 n/a | n/a  |      | 0 |
|     | 0.07 | 1 b0913   |     | 0.97 | 0.66  | 0     | 1.44 | 0.68 | 0 |
| n/a | n/a  |           | n/a | n/a  |       | 0 n/a | n/a  |      | 0 |
|     | 0.05 | 1 b1516   |     | 1.23 | 0.55  | 0     | 1.12 | 0.87 | 0 |
|     | 0.14 | 1 b3956   |     | 0.97 | 0.46  | 0     | 1    | 0.41 | 1 |
|     | 0.09 | 1         |     | 1.55 | 0.26  | 0     | 1.52 | 0.37 | 0 |
|     | 0.12 | 1 b0854   |     | 1.04 | 0.44  | 0     | 1.79 | 0.42 | 0 |
| n/a | n/a  |           | n/a | n/a  |       | 0 n/a | n/a  |      | 0 |
|     | 0.1  | 1 b2515   |     | 0.79 | 0.41  | 1     | 1.17 | 0.4  | 0 |
|     | 0.14 | 1         |     | 1.54 | 0.39  | 0     | 1.21 | 2.25 | 0 |
|     | 0.14 | 1 b0892   |     | 0.96 | 0.57  | 0     | 0.88 | 0.34 | 1 |
|     | 0.05 | 1         |     | 1.36 | 0.36  | 0     | 1.3  | 0.72 | 0 |
|     | 0.05 | 1         |     | 1.05 | 0.24  | 0     | 1.44 | 0.36 | 0 |
|     | 0.12 | 1 b2217   |     | 0.81 | 0.38  | 0     | 0.88 | 0.72 | 1 |
|     | 0.1  | 1 b4330   |     | 1.32 | 0.53  | 0     | 1.99 | 0.42 | 0 |
|     | 0.11 | 1         |     | 1.57 | 1.11  | 0     | 1.62 | 0.74 | 0 |
|     | 0.17 | 1 b2299   |     | 0.74 | 0.48  | 1     | 0.85 | 0.29 | 1 |
|     | 0.08 | 1 b1922   |     | 1.24 | 0.38  | 1     | 0.95 | 0.36 | 1 |
| n/a | n/a  |           | n/a | n/a  |       | 0 n/a | n/a  |      | 0 |
|     | 0.13 | 1 b1065   |     | 1.68 | 0.52  | 0     | 1.87 | 0.33 | 0 |
|     | 0.13 | 1         |     | 1.72 | 0.46  | 0     | 1.6  | 0.65 | 0 |
|     | 0.14 | 1 b4186   |     | 1.37 | 32.43 | 0     | 1.94 | 0.5  | 0 |
|     | 0.16 | 1         |     | 6.01 | 3.23  | 1     | 2.13 | 1.73 | 0 |
|     | 0.09 | 1 b1635   |     | 1.52 | 0.94  | 0     | 1.53 | 1.02 | 0 |
|     | 0.3  | 0 b1957   |     | 1.5  | 0.57  | 0     | 1.69 | 0.7  | 0 |
|     | 0.14 | 1 b2014   |     | 0.56 | 0.28  | 1     | 1    | 0.53 | 1 |
|     | 0.09 | n/a b2249 |     | 0.88 | 0.43  | 0     | 1.65 | 0.51 | 0 |
|     | 0.15 | 1 b2288   |     | 0.62 | 0.19  | 1     | 0.52 | 0.44 | 1 |
|     | 0.13 | 1         |     | 1.16 | 0.49  | 0     | 1.23 | 0.65 | 0 |
| n/a | n/a  |           | n/a | n/a  |       | 0 n/a | n/a  |      | 0 |
|     | 0.12 | 1         |     | 0.83 | 0.37  | 0     | 1.31 | 0.37 | 0 |
|     | 0.16 | 1 b2320   |     | 0.48 | 0.26  | 1     | 0.79 | 0.31 | 1 |
|     | 0.09 | 1         |     | 1.83 | 0.38  | 0     | 1.67 | 0.33 | 0 |
|     | 0.02 | 1 b1603   |     | 0.6  | 0.74  | 1     | 0.63 | 0.56 | 1 |
|     | 0.19 | 1 b0237   |     | 0.66 | 0.14  | 1     | 0.46 | 0.48 | 1 |
|     | 0.1  | 1         |     | 0.98 | 0.31  | 0     | 1.41 | 0.31 | 1 |
|     | 0.18 | 1         |     | 0.62 | 0.07  | 1     | 0.45 | 0.56 | 1 |
|     | 0.11 | 1         |     | 1.78 | 0.44  | 1     | 1.27 | 2.57 | 1 |
|     | 0.1  | 1 b1748   |     | 0.9  | 0.27  | 0     | 1.2  | 0.5  | 0 |
|     | 0.09 | 1 b1713   |     | 0.84 | 0.3   | 1     | 0.63 | 0.48 | 1 |
| n/a | n/a  |           | n/a | n/a  |       | 0 n/a | n/a  |      | 0 |
|     | 0.06 | 1 b2103   |     | 1.36 | 0.62  | 0     | 1.69 | 0.68 | 0 |
|     | 0.06 | 1 b1609   |     | 1.09 | 0.35  | 0     | 1.2  | 3.34 | 0 |

|     |          |         |     |      |       |       |       |       |   |
|-----|----------|---------|-----|------|-------|-------|-------|-------|---|
|     | 0.07     | 1       |     | 1.52 | 0.47  | 0     | 1.47  | 0.68  | 0 |
|     | 0.11     | 1       |     | 0.74 | 0.42  | 0     | 1.48  | 0.88  | 0 |
|     | 0.06     | 1       |     | 1.61 | 0.49  | 0     | 1.88  | 3.19  | 0 |
|     | 0.09     | 1 b0172 |     | 0.64 | 0.28  | 1     | 0.44  | 0.37  | 1 |
|     | 0.13     | 1 b1951 |     | 1.52 | 0.22  | 0     | 1.73  | 0.39  | 0 |
|     | 0.09     | 1 b2379 |     | 0.72 | 0.26  | 1     | 1.43  | 0.75  | 0 |
|     | 0.17     | 1 b2277 |     | 0.5  | 0.06  | 1     | 0.72  | 0.75  | 1 |
|     | 0.08     | 1 b1702 |     | 0.22 | 0.14  | 1     | 0.13  | 0.24  | 1 |
|     | 0.23     | 1       |     | 0.76 | 0.31  | 1     | 0.65  | 0.59  | 1 |
|     | 0.1      | 1       |     | 1.53 | 0.34  | 0     | 1.56  | 0.5   | 0 |
|     | 0.1      | 1 b0491 |     | 1.13 | 0.62  | 0     | 1.75  | 0.61  | 0 |
|     | 0.27     | 1 b3866 |     | 0.76 | 0.31  | 0     | 0.78  | 0.31  | 1 |
|     | 0.19     | 1 b4160 |     | 1.06 | 0.19  | 1     | 0.92  | 0.49  | 1 |
| n/a | n/a      |         | n/a | n/a  |       | 0 n/a | n/a   |       | 0 |
|     | 0.14     | 1 b3033 |     | 1.25 | 2.05  | 0     | 1.47  | 0.42  | 0 |
|     | 0.18     | 1 b3451 |     | 1.07 | 0.31  | 0     | 1.53  | 0.98  | 0 |
|     | 0.13     | 1 b3172 |     | 1.02 | 0.37  | 0     | 1.73  | 0.6   | 0 |
|     | 0.09     | 1 b2302 |     | 1.15 | 0.55  | 0     | 1.73  | 0.69  | 0 |
|     | 0.04     | 1       |     | 1.26 | 0.4   | 0     | 1.97  | 1.07  | 0 |
|     | 0.06     | 1 b4206 |     | 1.31 | 0.34  | 1     | 1.38  | 0.39  | 0 |
|     | 0.05     | 1 b4264 |     | 0.91 | 0.62  | 0     | 1.25  | 0.24  | 0 |
|     | 0.11     | 1 b2663 |     | 1.4  | 0.61  | 0     | 1.82  | 0.74  | 0 |
|     | 0.1      | 1 b4327 |     | 1.25 | 0.46  | 0     | 1.21  | 0.19  | 0 |
|     | 0.1      | 1       |     | 1.42 | 1.04  | 0     | 2.08  | 0.84  | 0 |
|     | 0.15     | 0       |     | 1.2  | 0.64  | 0     | 1.63  | 0.6   | 0 |
| n/a | n/a      | b3131   | n/a | n/a  |       | 0 n/a | n/a   |       | 0 |
| n/a | n/a      |         | n/a | n/a  |       | 0 n/a | n/a   |       | 0 |
|     | 0.09     | 1 b3942 |     | 48.5 | 19.75 | 1     | 39.16 | 18.43 | 1 |
|     | 0.12     | 1 b1812 |     | 1.02 | 0.2   | 0     | 1.57  | 0.4   | 0 |
|     | 0.21     | 1       |     | 0.74 | 0.16  | 1     | 0.82  | 0.8   | 1 |
|     | 0.09     | 1 b3886 |     | 1.14 | 0.47  | 0     | 1.68  | 0.62  | 0 |
|     | 0.26     | 1       |     | 1.36 | 1.82  | 0     | 1.39  | 0.82  | 0 |
|     | 0.13     | 1 b3288 |     | 2.28 | 0.47  | 1     | 1.62  | 0.51  | 1 |
|     | 0.1      | 1       |     | 1.51 | 0.69  | 0     | 2.29  | 0.92  | 0 |
|     | 0.12     | 1 b3963 |     | 1.11 | 0.34  | 0     | 1.8   | 0.97  | 0 |
|     | 0.08     | 1       |     | 1.78 | 0.25  | 0     | 1.86  | 0.65  | 0 |
|     | 0.08     | 0 b0721 |     | 0.45 | 0.14  | 1     | 0.77  | 0.58  | 1 |
|     | 0.11     | 1 b0907 |     | 0.59 | 0.71  | 1     | 0.87  | 0.28  | 1 |
|     | 0.06     | 1       |     | 1.52 | 0.58  | 0     | 1.32  | 0.48  | 0 |
|     | 0.14     | 1 b3366 |     | 1    | 0.53  | 0     | 1.57  | 0.7   | 0 |
|     | 0.26     | 1 b3993 |     | 1.52 | 0.44  | 0     | 1.71  | 0.64  | 0 |
|     | 0.12     | 1 b3458 |     | 1.18 | 0.16  | 0     | 1.84  | 0.67  | 0 |
|     | 0.27 n/a |         |     | 1.58 | 0.22  | 0     | 2.21  | 0.79  | 0 |
|     | 0.06     | 1       |     | 1.17 | 0.44  | 0     | 1.45  | 0.39  | 0 |
|     | 0.04     | 0 b1071 |     | 1.68 | 0.31  | 0     | 1.57  | 0.28  | 0 |
|     | 0.23     | 1 b3253 |     | 1    | 0.32  | 1     | 0.92  | 0.29  | 1 |
|     | 0.23     | 1       |     | 0.95 | 0.87  | 0     | 1.41  | 0.45  | 0 |
|     | 0.27     | 0       |     | 1.94 | 0.82  | 0     | 1.73  | 0.67  | 0 |
|     | 0.25 n/a |         |     | 4.56 | 1.89  | 1     | 2.2   | 1.28  | 1 |
|     | 0.09     | 1 b3880 |     | 1.53 | 0.33  | 0     | 1.26  | 0.21  | 1 |
|     | 0.07 n/a |         |     | 1.49 | 0.58  | 0     | 1.69  | 0.4   | 0 |
|     | 0.09     | 1       |     | 1.2  | 0.38  | 0     | 1.13  | 0.78  | 0 |

|      |           |      |      |   |      |      |   |
|------|-----------|------|------|---|------|------|---|
| 0.1  | 1         | 1.6  | 0.45 | 0 | 1.4  | 1.43 | 0 |
| 0.11 | 1 b4122   | 1.64 | 0.47 | 0 | 1.07 | 1.13 | 1 |
| 0.07 | n/a b1897 | 1.27 | 0.5  | 0 | 1.42 | 0.47 | 0 |
| 0.05 | 1 b2502   | 0.98 | 0.82 | 0 | 1.42 | 0.45 | 0 |
| 0.08 | 1 b4060   | 1.26 | 0.78 | 0 | 2.07 | 1.16 | 0 |
| 0.06 | 1 b2603   | 1.13 | 0.37 | 0 | 1.43 | 0.42 | 0 |
| 0.04 | 1         | 1.79 | 0.39 | 0 | 1.93 | 0.53 | 0 |
| 0.07 | 1 b3673   | 0.79 | 0.17 | 0 | 1.83 | 1.07 | 0 |
| 0.22 | 1 b3833   | 0.63 | 0.33 | 1 | 1    | 0.55 | 1 |
| 0.2  | 1         | 1.12 | 0.21 | 0 | 1.46 | 0.79 | 0 |
| 0.09 | 1         | 1.92 | 0.61 | 1 | 1.86 | 1.17 | 0 |
| 0.15 | 0 b2347   | 1.35 | 0.46 | 0 | 2.14 | 1.08 | 0 |
| 0.09 | 0 b1174   | 1.06 | 0.27 | 1 | 0.95 | 0.67 | 1 |
| 0.09 | 1 b1253   | 1.08 | 0.52 | 0 | 1.46 | 0.62 | 0 |
| 0.14 | 1 b2808   | 1.19 | 0.39 | 0 | 1.13 | 0.51 | 1 |
| 0.12 | 1         | 1.38 | 0.55 | 0 | 2.13 | 0.44 | 0 |
| 0.19 | 1         | 0.99 | 0.52 | 0 | 1.51 | 0.44 | 0 |
| 0.06 | 1 b0578   | 0.8  | 0.16 | 1 | 0.83 | 0.28 | 1 |
| 0.13 | 1 b3931   | 0.95 | 0.12 | 1 | 0.67 | 0.36 | 1 |
| 0.13 | 1         | 1.7  | 0.86 | 0 | 1.8  | 0.79 | 0 |
| 0.16 | 1 b3821   | 0.68 | 0.6  | 0 | 0.9  | 0.38 | 1 |
| 0.12 | 1 b3793   | 1.1  | 0.39 | 0 | 1.1  | 0.74 | 0 |
| 0.25 | 1         | 1.48 | 0.53 | 0 | 1.63 | 1.31 | 0 |
| 0.11 | 1         | 1.1  | 46.4 | 0 | 1.17 | 0.49 | 0 |
| 0.17 | 1 b2790   | 1.05 | 0.25 | 1 | 1.2  | 0.47 | 1 |
| 0.13 | 1         | 0.97 | 0.2  | 0 | 1.42 | 0.57 | 0 |
| 0.17 | 1 b3838   | 0.52 | 0.33 | 1 | 0.6  | 0.35 | 1 |
| 0.1  | 1 b0506   | 0.95 | 0.26 | 1 | 1.01 | 0.72 | 1 |
| n/a  | n/a       | n/a  | n/a  | 0 | n/a  | n/a  | 0 |
| 0.06 | 1         | 1.24 | 0.28 | 0 | 1.25 | 0.5  | 1 |
| 0.06 | 1         | 0.82 | 0.52 | 0 | 1.2  | 0.66 | 1 |
| 0.04 | 1         | 1.64 | 0.69 | 0 | 1.78 | 0.54 | 0 |
| 0.1  | n/a       | 1.21 | 0.32 | 0 | 1.52 | 0.37 | 0 |
| 0.09 | 1 b1439   | 0.72 | 0.24 | 1 | 1.11 | 0.33 | 1 |
| 0.16 | 1         | 1.41 | 0.39 | 0 | 1.44 | 0.39 | 0 |
| 0.06 | 1         | 1.58 | 0.19 | 0 | 1.96 | 0.55 | 0 |
| 0.12 | 1 b1860   | 1.02 | 0.23 | 0 | 1.2  | 0.87 | 0 |
| 0.09 | 1 b0478   | 1.17 | 0.7  | 0 | 1.44 | 0.85 | 0 |
| 0.08 | 1         | 1.28 | 0.46 | 0 | 1.52 | 0.57 | 0 |
| 0.06 | 1         | 1.12 | 0.38 | 0 | 1.56 | 0.81 | 0 |
| 0.14 | 1 b0600   | 1.82 | 0.38 | 0 | 1.34 | 0.45 | 0 |
| 0.11 | 1 b0594   | 4.63 | 3.05 | 1 | 1.97 | 0.43 | 0 |
| 0.17 | 1         | 1.32 | 0.75 | 0 | 1.22 | 0.39 | 1 |
| 0.05 | 1 b1238   | 0.8  | 0.69 | 1 | 1.07 | 0.71 | 0 |
| 0.11 | 1         | 1.49 | 0.41 | 0 | 1.41 | 2.05 | 0 |
| 0.13 | 1 b1413   | 1.35 | 0.33 | 1 | 1.05 | 0.64 | 1 |
| 0.2  | 0         | 1.54 | 0.61 | 0 | 1.71 | 0.67 | 0 |
| 0.25 | 0         | 1.29 | 0.44 | 0 | 2.14 | 0.57 | 0 |
| 0.22 | 1         | 2.3  | 0.3  | 1 | 1.69 | 0.76 | 1 |
| 0.17 | 1         | 1.64 | 0.62 | 1 | 1.14 | 0.65 | 0 |
| 0.11 | 1         | 1.57 | 0.53 | 0 | 2.33 | 0.86 | 0 |
| n/a  | n/a       | n/a  | n/a  | 0 | n/a  | n/a  | 0 |

|      |     |       |      |      |   |      |      |   |
|------|-----|-------|------|------|---|------|------|---|
| 0.1  | 1   | b0447 | 2.29 | 0.23 | 1 | 1.94 | 1.01 | 0 |
| 0.19 | 1   | b2948 | 0.79 | 0.4  | 0 | 0.92 | 0.26 | 1 |
| 0.12 | 1   | b3603 | 1.19 | 0.95 | 0 | 1.47 | 0.42 | 0 |
| 0.17 | 1   | b3685 | 1.61 | 0.37 | 0 | 1.48 | 1.04 | 0 |
| 0.09 | 1   | b2819 | 1.58 | 0.44 | 1 | 1.07 | 0.36 | 1 |
| 0.11 | 1   |       | 1.2  | 0.35 | 0 | 1.48 | 0.36 | 0 |
| 0.16 | 1   |       | 1.45 | 0.22 | 1 | 1.84 | 1.22 | 1 |
| 0.13 | 1   | b3525 | 0.87 | 0.41 | 0 | 1.33 | 0.29 | 0 |
| 0.13 | 1   |       | 0.84 | 0.2  | 1 | 1.26 | 0.37 | 1 |
| 0.03 | 1   | b3590 | 1.29 | 0.46 | 0 | 1.56 | 0.47 | 0 |
| 0.28 | 1   | b3638 | 0.76 | 0.46 | 0 | 0.86 | 0.66 | 1 |
| 0.2  | 1   |       | 1.25 | 0.32 | 0 | 1.9  | 0.46 | 0 |
| 0.09 | 1   | b0696 | 1.56 | 0.3  | 0 | 1.59 | 0.3  | 0 |
| 0.21 | 1   |       | 1.16 | 0.73 | 0 | 1.63 | 0.6  | 0 |
| 0.3  | 1   | b2684 | 0.31 | 0.18 | 1 | 0.33 | 0.46 | 1 |
| 0.08 | 1   | b2078 | 1.47 | 0.34 | 0 | 1.43 | 0.5  | 0 |
| 0.08 | 1   | b2177 | 1    | 0.42 | 0 | 1.21 | 0.32 | 1 |
| 0.13 | 1   | b2044 | 1.43 | 0.39 | 0 | 1.55 | 0.42 | 0 |
| 0.05 | 1   | b2131 | 1.22 | 0.9  | 0 | 1.91 | 0.6  | 0 |
| 0.09 | 0   |       | 1.3  | 0.6  | 0 | 1.64 | 0.62 | 0 |
| n/a  | n/a |       | n/a  | n/a  | 0 | n/a  | n/a  | 0 |
| 0.14 | 1   |       | 1.21 | 0.36 | 0 | 1.57 | 0.46 | 0 |
| 0.1  | 1   | b0869 | 0.79 | 0.38 | 0 | 1.02 | 0.44 | 1 |
| 0.13 | 1   | b3549 | 1.09 | 0.17 | 0 | 0.71 | 1.25 | 1 |
| 0.27 | 1   |       | 1.15 | 1.04 | 0 | 1.83 | 0.63 | 0 |
| 0.16 | 1   | b3576 | 1.33 | 0.66 | 0 | 1.5  | 0.54 | 0 |
| 0.07 | 1   | b3472 | 0.53 | 0.06 | 1 | 0.65 | 0.44 | 1 |
| 0.11 | 1   | b3225 | 1.5  | 0.16 | 1 | 1.63 | 0.52 | 0 |
| 0.2  | 1   | b3109 | 1.14 | 0.52 | 0 | 1.61 | 0.56 | 0 |
| 0.15 | 1   |       | 1.07 | 0.31 | 0 | 1.66 | 0.95 | 0 |
| 0.15 | 1   | b2724 | 1.76 | 0.64 | 0 | 1.74 | 1.33 | 0 |
| 0.19 | 1   | b3055 | 0.8  | 0.16 | 1 | 0.51 | 1.45 | 1 |
| 0.14 | 1   |       | 0.71 | 0.88 | 0 | 1.14 | 0.74 | 1 |
| 0.17 | 1   |       | 1.31 | 0.27 | 0 | 2.27 | 0.64 | 0 |
| n/a  | n/a |       | n/a  | n/a  | 0 | n/a  | n/a  | 0 |
| 0.14 | 1   | b0817 | 0.92 | 0.32 | 0 | 1.32 | 0.53 | 0 |
| 0.11 | 1   |       | 1.4  | 0.65 | 1 | 1.22 | 0.2  | 0 |
| 0.18 | 1   | b0755 | 2.24 | 0.55 | 1 | 2.39 | 1.05 | 1 |
| 0.06 | 1   | b0793 | 1.17 | 0.25 | 0 | 1.18 | 0.37 | 0 |
| 0.1  | n/a |       | 1.03 | 0.32 | 0 | 1.52 | 0.66 | 0 |
| 0.22 | 1   | b3198 | 1.16 | 0.19 | 0 | 1.57 | 1.14 | 1 |
| 0.08 | 1   | b1942 | 1.13 | 0.32 | 0 | 1.12 | 0.51 | 1 |
| 0.17 | 1   | b2989 | 1.33 | 0.33 | 1 | 1.31 | 0.64 | 0 |
| n/a  | n/a |       | n/a  | n/a  | 0 | n/a  | n/a  | 0 |
| n/a  | n/a |       | n/a  | n/a  | 0 | n/a  | n/a  | 0 |
| n/a  | n/a |       | n/a  | n/a  | 0 | n/a  | n/a  | 0 |
| 0.11 | 1   |       | 1.02 | 0.32 | 0 | 1.67 | 0.75 | 0 |
| 0.14 | 1   | b0427 | 0.77 | 0.15 | 1 | 1.11 | 0.7  | 1 |
| n/a  | n/a |       | n/a  | n/a  | 0 | n/a  | n/a  | 0 |
| 0.15 | 1   |       | 1.21 | 0.28 | 0 | 1.93 | 0.78 | 0 |
| 0.23 | n/a |       | 1.37 | 0.42 | 0 | 1.53 | 0.6  | 0 |
| 0.18 | n/a |       | 1.09 | 0.84 | 0 | 1.47 | 0.33 | 0 |

|     |      |     |       |      |      |   |      |      |   |
|-----|------|-----|-------|------|------|---|------|------|---|
|     | 0.09 | 1   |       | 0.62 | 0.14 | 1 | 0.37 | 3.53 | 1 |
|     | 0.18 | 1   | b0580 | 0.73 | 0.17 | 1 | 1.03 | 0.97 | 1 |
|     | 0.06 | 1   |       | 1.28 | 0.08 | 0 | 1.12 | 0.42 | 0 |
| n/a | n/a  |     |       | n/a  | n/a  | 0 | n/a  | n/a  | 0 |
| n/a | n/a  |     |       | n/a  | n/a  | 0 | n/a  | n/a  | 0 |
|     | 0.12 | 1   | b2236 | 1.17 | 0.15 | 0 | 1.74 | 0.72 | 0 |
|     | 0.1  | 1   | b2998 | 1.47 | 0.55 | 0 | 1.38 | 0.41 | 0 |
|     | 0.12 | 1   |       | 1.65 | 0.38 | 0 | 1.5  | 0.66 | 0 |
|     | 0.15 | 1   | b0607 | 1.93 | 0.52 | 1 | 1.94 | 1.05 | 1 |
|     | 0.18 | 1   |       | 1.76 | 0.69 | 0 | 1.71 | 0.59 | 0 |
|     | 0.08 | 1   | b3616 | 0.67 | 0.11 | 1 | 0.5  | 1.07 | 1 |
|     | 0.27 | 1   |       | 1.22 | 0.25 | 0 | 1.69 | 0.44 | 0 |
|     | 0.26 | 1   | b3686 | 3.66 | 1.39 | 1 | 4.6  | 2.27 | 1 |
|     | 0.27 | 1   | b3688 | 1.19 | 0.16 | 0 | 1.25 | 0.75 | 1 |
| n/a | n/a  |     |       | n/a  | n/a  | 0 | n/a  | n/a  | 0 |
| n/a | n/a  |     |       | n/a  | n/a  | 0 | n/a  | n/a  | 0 |
|     | 0.29 | 0   |       | 1.1  | 0.82 | 0 | 1.7  | 0.79 | 0 |
| n/a | n/a  |     |       | n/a  | n/a  | 0 | n/a  | n/a  | 0 |
|     | 0.25 | 1   |       | 1.72 | 0.67 | 0 | 1.73 | 0.73 | 0 |
| n/a | n/a  |     |       | n/a  | n/a  | 0 | n/a  | n/a  | 0 |
|     | 0.28 | 0   | b1622 | 1.96 | 1.03 | 0 | 1.47 | 0.93 | 0 |
|     | 0.13 | 1   | b0802 | 3.78 | 2.5  | 1 | 2.92 | 1.62 | 1 |
|     | 0.17 | 1   |       | 0.92 | 0.44 | 0 | 1.01 | 0.39 | 0 |
|     | 0.21 | 1   |       | 1.26 | 3.27 | 0 | 1.29 | 0.43 | 0 |
|     | 0.13 | 1   | b2304 | 1.32 | 0.47 | 0 | 1.32 | 0.47 | 0 |
| n/a | n/a  |     |       | n/a  | n/a  | 0 | n/a  | n/a  | 0 |
| n/a | n/a  |     |       | n/a  | n/a  | 0 | n/a  | n/a  | 0 |
| n/a | n/a  |     |       | n/a  | n/a  | 0 | n/a  | n/a  | 0 |
| n/a | n/a  |     |       | n/a  | n/a  | 0 | n/a  | n/a  | 0 |
| n/a | n/a  |     |       | n/a  | n/a  | 0 | n/a  | n/a  | 0 |
| n/a | n/a  |     |       | n/a  | n/a  | 0 | n/a  | n/a  | 0 |
| n/a | n/a  |     |       | n/a  | n/a  | 0 | n/a  | n/a  | 0 |
| n/a | n/a  |     |       | n/a  | n/a  | 0 | n/a  | n/a  | 0 |
| n/a | n/a  |     |       | n/a  | n/a  | 0 | n/a  | n/a  | 0 |
|     | 0.16 | 1   |       | 0.83 | 0.17 | 1 | 0.97 | 0.55 | 1 |
|     | 0.15 | n/a | b2309 | 0.61 | 0.16 | 1 | 0.97 | 0.5  | 1 |
|     | 0.19 | n/a | b2406 | 0.98 | 0.27 | 0 | 1.49 | 0.27 | 0 |
|     | 0.13 | n/a | b2465 | 0.71 | 0.11 | 1 | 0.95 | 0.47 | 1 |
|     | 0.06 | n/a | b2470 | 1.43 | 0.2  | 1 | 1.15 | 0.75 | 1 |
|     | 0.1  | n/a |       | 0.09 | 0.03 | 1 | 0.23 | 0.15 | 1 |
|     | 0.14 | 1   |       | 1.14 | 0.4  | 0 | 1.12 | 0.48 | 1 |
|     | 0.16 | 0   |       | 1.84 | 0.55 | 0 | 1.73 | 1.26 | 0 |
|     | 0.1  | 1   |       | 1.21 | 0.26 | 0 | 1.06 | 1.4  | 1 |
|     | 0.1  | 1   |       | 1.18 | 0.36 | 0 | 1.21 | 0.87 | 0 |
|     | 0.07 | 1   |       | 1.79 | 0.84 | 0 | 2.4  | 1.14 | 0 |
|     | 0.11 | n/a |       | 1.74 | 0.48 | 0 | 1.49 | 0.83 | 0 |
|     | 0.1  | 1   | b0739 | 0.68 | 0.1  | 1 | 0.88 | 0.68 | 1 |
|     | 0.14 | n/a |       | 2.9  | 2.26 | 1 | 4.65 | 1.37 | 1 |
|     | 0.11 | 1   |       | 1.15 | 0.21 | 0 | 1.39 | 0.62 | 0 |
|     | 0.09 | 1   |       | 1.31 | 0.39 | 0 | 1.25 | 0.41 | 0 |
|     | 0.19 | 1   |       | 1.24 | 0.49 | 0 | 1.55 | 0.34 | 0 |
|     | 0.25 | 1   |       | 1.15 | 0.15 | 0 | 1.73 | 0.78 | 0 |

|      |     |       |       |      |   |      |      |   |
|------|-----|-------|-------|------|---|------|------|---|
| 0.11 | 1   |       | 1.38  | 0.19 | 1 | 1.2  | 0.63 | 1 |
| 0.12 | n/a |       | 1.26  | 0.39 | 0 | 1.3  | 0.38 | 0 |
| 0.09 | 1   |       | 1.51  | 0.28 | 0 | 1.59 | 0.52 | 0 |
| 0.2  | 1   |       | 1.27  | 0.18 | 0 | 1.54 | 0.63 | 0 |
| 0.15 | 1   |       | 1.82  | 0.55 | 0 | 1.32 | 0.65 | 0 |
| 0.07 | 1   |       | 1.07  | 1.47 | 0 | 1.24 | 0.62 | 0 |
| 0.07 | n/a |       | 1.15  | 3.23 | 0 | 1.98 | 0.59 | 0 |
| 0.12 | 1   |       | 1.53  | 0.61 | 0 | 1.45 | 1.2  | 0 |
| 0.09 | 1   |       | 1.51  | 1.25 | 0 | 1.69 | 0.87 | 0 |
| 0.12 | 1   |       | 1.5   | 0.79 | 0 | 2.28 | 1.4  | 0 |
| 0.21 | 0   |       | 1.52  | 0.3  | 0 | 1.44 | 0.75 | 0 |
| 0.08 | 1   |       | 1.05  | 0.39 | 0 | 1.4  | 0.83 | 0 |
| 0.08 | n/a |       | 1.29  | 0.42 | 0 | 1.36 | 0.72 | 0 |
| 0.11 | 1   |       | 1.43  | 0.24 | 0 | 1.59 | 0.57 | 1 |
| 0.15 | 1   |       | 1.45  | 0.41 | 1 | 1.77 | 0.77 | 1 |
| 0.19 | 1   |       | 1.09  | 0.24 | 1 | 0.89 | 0.6  | 1 |
| 0.17 | 1   |       | 1.29  | 0.43 | 0 | 1.84 | 0.54 | 0 |
| 0.19 | 1   |       | 1.3   | 0.25 | 0 | 1.32 | 0.46 | 1 |
| 0.28 | 1   |       | 1.6   | 0.26 | 0 | 1.7  | 0.88 | 0 |
| 0.21 | 1   |       | 0.97  | 0.14 | 1 | 0.62 | 0.32 | 1 |
| 0.21 | 1   |       | 2.77  | 0.41 | 1 | 1.9  | 1.06 | 1 |
| 0.2  | 1   |       | 1.07  | 0.07 | 1 | 1.09 | 0.57 | 1 |
| 0.18 | 1   |       | 1.4   | 0.35 | 0 | 1.72 | 0.33 | 0 |
| 0.19 | 1   | b3689 | 0.95  | 0.44 | 0 | 1.42 | 0.55 | 1 |
| 0.21 | 1   | b3697 | 1.16  | 0.38 | 0 | 1.27 | 0.43 | 1 |
| 0.12 | 1   | b3725 | 0.93  | 0.3  | 0 | 0.82 | 0.39 | 1 |
| 0.21 | 1   | b3669 | 1.47  | 0.37 | 0 | 1.54 | 0.6  | 0 |
| 0.29 | 1   | b3184 | 1.06  | 0.58 | 0 | 1.35 | 0.44 | 0 |
| 0.16 | n/a | b3223 | 2.15  | 0.6  | 0 | 1.64 | 0.67 | 0 |
| 0.14 | 1   | b3200 | 0.84  | 0.43 | 1 | 0.4  | 0.34 | 1 |
| 0.12 | 1   |       | 1.67  | 0.41 | 0 | 1.72 | 0.62 | 0 |
| n/a  | n/a |       | n/a   | n/a  | 0 | n/a  | n/a  | 0 |
| 0.07 | 1   |       | 1.48  | 0.57 | 0 | 1.3  | 0.62 | 0 |
| 0.02 | 1   | b0677 | 18.07 | 8.32 | 1 | 7.98 | 4.23 | 1 |
| 0.07 | n/a | b0697 | 1.51  | 0.34 | 0 | 1.62 | 0.54 | 0 |
| 0.06 | 1   | b1533 | 1.62  | 0.48 | 0 | 1.92 | 0.59 | 0 |
| n/a  | n/a |       | n/a   | n/a  | 0 | n/a  | n/a  | 0 |
| 0.13 | 1   | b3704 | 0.29  | 0.78 | 1 | 0.47 | 0.44 | 1 |
| 0.08 | n/a |       | 1.33  | 0.24 | 0 | 1.72 | 0.63 | 0 |
| 0.27 | 1   | b0013 | 1.29  | 0.22 | 0 | 1.88 | 0.5  | 0 |
| 0.12 | 1   |       | 1.45  | 0.58 | 0 | 1.92 | 0.38 | 0 |
| 0.23 | 0   | b2573 | 1.19  | 0.3  | 0 | 1.9  | 0.94 | 0 |
| 0.13 | 1   | b3752 | 0.87  | 0.1  | 1 | 1.1  | 0.77 | 1 |
| 0.19 | 1   |       | 1.1   | 0.33 | 0 | 1.95 | 0.65 | 0 |
| 0.07 | 1   | b0084 | 1.29  | 0.34 | 0 | 1.54 | 0.77 | 0 |
| 0.23 | 1   |       | 1.88  | 0.76 | 0 | 1.62 | 0.64 | 0 |
| 0.1  | 1   | b3262 | 1.32  | 0.51 | 0 | 1.82 | 0.59 | 0 |
| 0.04 | 1   |       | 1.28  | 0.18 | 0 | 2.03 | 0.59 | 0 |
| 0.23 | 1   | b3343 | 0.86  | 0.55 | 0 | 0.99 | 0.59 | 0 |
| 0.12 | 1   | b1099 | 1.19  | 0.5  | 0 | 1.52 | 0.42 | 0 |
| 0.03 | 1   | b1128 | 1.07  | 0.41 | 0 | 0.76 | 0.37 | 1 |
| 0.07 | 0   | b1795 | 1.88  | 0.85 | 0 | 2.22 | 1.11 | 0 |

|     |         |     |       |      |       |   |      |      |   |
|-----|---------|-----|-------|------|-------|---|------|------|---|
|     | 0.06    | 1   | b2046 | 1.3  | 0.36  | 0 | 1.63 | 0.37 | 0 |
|     | 0.07    | 1   | b3391 | 1.61 | 0.79  | 0 | 1.41 | 0.48 | 0 |
|     | 0.05    | 1   | b1134 | 1.15 | 0.46  | 0 | 0.94 | 0.36 | 1 |
|     | 0.07    | 1   |       | 1.58 | 0.6   | 0 | 2.11 | 0.7  | 0 |
|     | 0.07    | 1   | b2049 | 1.53 | 0.43  | 0 | 1.49 | 0.35 | 0 |
|     | 0.09    | 1   |       | 1.55 | 0.53  | 0 | 2.13 | 0.7  | 0 |
| n/a | n/a     |     |       | n/a  | n/a   | 0 | n/a  | n/a  | 0 |
|     | 0.19    | 1   | b1779 | 0.46 | 0.13  | 1 | 0.19 | 0.09 | 1 |
|     | 0.12    | 1   | b2067 | 0.96 | 0.34  | 0 | 1.71 | 0.43 | 0 |
|     | 0.13    | 1   | b0009 | 1.2  | 0.31  | 0 | 1.33 | 0.47 | 0 |
|     | 0.11    | 1   |       | 1.73 | 0.81  | 0 | 1.34 | 0.82 | 0 |
|     | 0.13    | 1   |       | 1.01 | 0.43  | 0 | 1.61 | 0.36 | 0 |
| n/a | n/a     |     |       | n/a  | n/a   | 0 | n/a  | n/a  | 0 |
| n/a | n/a     |     |       | n/a  | n/a   | 0 | n/a  | n/a  | 0 |
|     | 0.09    | n/a | b4074 | 1.88 | 0.66  | 0 | 1.72 | 0.73 | 0 |
| n/a | n/a     |     |       | n/a  | n/a   | 0 | n/a  | n/a  | 0 |
|     | 0.08    | 1   | b2389 | 1.31 | 0.93  | 0 | 1.77 | 0.56 | 0 |
|     | 0.08    | 1   | b2433 | 1.07 | 0.49  | 0 | 1.23 | 0.61 | 0 |
| n/a | n/a     |     |       | n/a  | n/a   | 0 | n/a  | n/a  | 0 |
| n/a | n/a     |     |       | n/a  | n/a   | 0 | n/a  | n/a  | 0 |
| n/a | n/a     |     |       | n/a  | n/a   | 0 | n/a  | n/a  | 0 |
|     | 0.08    | 1   |       | 1.24 | 0.19  | 0 | 1.37 | 0.54 | 0 |
|     | 0.07    | 1   |       | 0.98 | 0.59  | 0 | 1.24 | 0.62 | 0 |
|     | 0.18    | 1   |       | 1.34 | 0.13  | 0 | 1.45 | 0.64 | 0 |
| n/a | n/a     |     |       | n/a  | n/a   | 0 | n/a  | n/a  | 0 |
|     | 0.26    | 0   | b2726 | 1.75 | 0.21  | 0 | 1.72 | 0.61 | 0 |
|     | 0.1     | 1   |       | 1.61 | 0.44  | 0 | 1.85 | 0.53 | 0 |
| n/a | n/a     |     |       | n/a  | n/a   | 0 | n/a  | n/a  | 0 |
|     | 0.16    | 1   | b2464 | 1.09 | 0.76  | 0 | 0.9  | 0.91 | 1 |
|     | 0.12    | 1   | b0888 | 1.97 | 0.71  | 1 | 0.82 | 0.29 | 1 |
|     | 0.07    | 1   | b0918 | 1.15 | 0.29  | 0 | 1.28 | 0.48 | 0 |
|     | 0.06    | 1   | b0905 | 1.06 | 0.36  | 0 | 1.2  | 0.51 | 0 |
| n/a | n/a     |     |       | n/a  | n/a   | 0 | n/a  | n/a  | 0 |
|     | 0.35    | 0   | b4217 | 1.29 | 0.76  | 0 | 2.14 | 0.95 | 0 |
|     | 0.08    | 1   | b2240 | 1.48 | 0.25  | 1 | 0.71 | 0.21 | 1 |
|     | 0.1     | 0   |       | 1.72 | 0.67  | 0 | 1.29 | 1.05 | 0 |
|     | 0.07    | 1   | b1890 | 1.66 | 0.52  | 0 | 1.34 | 0.88 | 0 |
|     | 0.22    | 1   |       | 0.96 | 0.25  | 0 | 0.85 | 0.53 | 1 |
|     | 0.1     | 1   | b1118 | 1    | 31.77 | 0 | 1.21 | 0.52 | 0 |
|     | 0.12    | 1   | b1662 | 0.98 | 0.39  | 0 | 1.04 | 0.28 | 1 |
|     | 0.1 n/a |     | b1135 | 0.82 | 0.45  | 0 | 0.7  | 0.43 | 1 |
|     | 0.14    | 1   |       | 1.56 | 0.3   | 0 | 1.68 | 0.92 | 0 |
|     | 0.11    | 1   | b1955 | 1.24 | 0.56  | 0 | 1.56 | 1.09 | 0 |
|     | 0.2     | 0   | b1724 | 1.49 | 0.55  | 0 | 1.49 | 0.4  | 0 |
|     | 0.14    | 1   | b4179 | 1.54 | 0.18  | 1 | 1.07 | 0.49 | 1 |
|     | 0.07    | 1   | b4211 | 1.59 | 0.23  | 0 | 1.99 | 1.4  | 0 |
| n/a | n/a     |     |       | n/a  | n/a   | 0 | n/a  | n/a  | 0 |
| n/a | n/a     |     |       | n/a  | n/a   | 0 | n/a  | n/a  | 0 |
|     | 0.24    | 1   |       | 1.99 | 0.5   | 0 | 2.2  | 0.71 | 0 |
|     | 0.13    | 1   |       | 1.47 | 0.39  | 0 | 1.62 | 0.55 | 0 |
| n/a | n/a     |     |       | n/a  | n/a   | 0 | n/a  | n/a  | 0 |
|     | 0.05    | 1   |       | 2.21 | 0.77  | 1 | 1.36 | 0.29 | 0 |



|     |          |         |       |      |       |       |      |   |
|-----|----------|---------|-------|------|-------|-------|------|---|
|     | 0.12     | 1 b1891 | 1.4   | 0.61 | 0     | 1.96  | 1.31 | 0 |
|     | 0.07     | 1       | 1.62  | 0.32 | 0     | 1.78  | 0.54 | 0 |
|     | 0.14     | 1 b2459 | 1.78  | 0.73 | 0     | 1.55  | 0.76 | 0 |
|     | 0.12     | 1 b2587 | 1.12  | 0.13 | 0     | 1.19  | 0.24 | 1 |
|     | 0.07     | 1       | 1.73  | 0.9  | 0     | 1.88  | 1    | 0 |
|     | 0.13     | 1       | 1.23  | 0.17 | 0     | 1.85  | 0.78 | 0 |
|     | 0.07     | 1 b4024 | 1     | 0.35 | 0     | 1.29  | 0.48 | 0 |
|     | 0.12     | 1 b2688 | 0.93  | 0.18 | 1     | 0.67  | 0.45 | 1 |
| n/a | n/a      |         | n/a   | n/a  | 0 n/a | n/a   |      | 0 |
|     | 0.12     | 1 b1948 | 1.18  | 0.74 | 0     | 1.16  | 0.66 | 0 |
|     | 0.1      | 1       | 0.8   | 0.4  | 1     | 0.61  | 0.47 | 1 |
|     | 0.07     | 1 b1879 | 1.18  | 0.31 | 0     | 1.12  | 0.34 | 0 |
|     | 0.18     | 1       | 1.2   | 0.21 | 1     | 0.89  | 0.19 | 1 |
|     | 0.18     | 1 b3748 | 1.56  | 0.97 | 0     | 2.25  | 0.21 | 0 |
|     | 0.11     | 1 b0170 | 0.52  | 0.07 | 1     | 0.19  | 0.06 | 1 |
|     | 0.12     | 0 b0384 | 1.71  | 0.44 | 0     | 1.84  | 0.58 | 0 |
|     | 0.09     | 1 b4022 | 0.69  | 0.29 | 0     | 0.64  | 0.4  | 1 |
|     | 0.07     | 1       | 1.45  | 0.52 | 0     | 1.59  | 1.09 | 0 |
|     | 0.06     | 1 b1741 | 2.14  | 1.96 | 0     | 1.86  | 1.02 | 0 |
| n/a | n/a      |         | n/a   | n/a  | 0 n/a | n/a   |      | 0 |
|     | 0.09     | 1 b1623 | 0.68  | 0.29 | 1     | 0.85  | 0.58 | 1 |
|     | 0.08 n/a |         | 2.09  | 0.69 | 0     | 2     | 1.39 | 0 |
|     | 0.05     | 1       | 1.37  | 0.81 | 0     | 2.01  | 0.68 | 0 |
|     | 0.11     | 1 b0529 | 1.09  | 0.36 | 0     | 1.33  | 0.63 | 0 |
| n/a | n/a      |         | n/a   | n/a  | 0 n/a | n/a   |      | 0 |
|     | 0.08     | 1 b4379 | 1.72  | 0.74 | 0     | 2.36  | 2.09 | 0 |
|     | 0.17     | 1 b3609 | 0.68  | 0.11 | 1     | 0.41  | 2.13 | 1 |
|     | 0.1      | 1 b3412 | 1.58  | 0.69 | 0     | 1.63  | 0.39 | 1 |
| n/a | n/a      |         | n/a   | n/a  | 0 n/a | n/a   |      | 0 |
|     | 0.15     | 0 b1213 | 1.12  | 0.52 | 0     | 2.31  | 0.92 | 0 |
|     | 0.06     | 1 b0503 | 1.39  | 0.28 | 0     | 1.19  | 0.23 | 0 |
| n/a | n/a      |         | n/a   | n/a  | 0 n/a | n/a   |      | 0 |
| n/a | n/a      |         | n/a   | n/a  | 0 n/a | n/a   |      | 0 |
|     | 0.13     | 1 b4210 | 1.94  | 2.43 | 0     | 1.81  | 0.86 | 0 |
| n/a | n/a      |         | n/a   | n/a  | 0 n/a | n/a   |      | 0 |
|     | 0.13     | 1       | 1.44  | 0.45 | 0     | 1.71  | 0.6  | 0 |
|     | 0.13     | 1 b3058 | 0.89  | 0.29 | 0     | 1.1   | 0.39 | 1 |
|     | 0.08     | 1 b3429 | 2.01  | 0.33 | 0     | 1.64  | 0.69 | 0 |
|     | 0.14     | 1 b3646 | 0.93  | 0.38 | 0     | 2.46  | 0.95 | 0 |
|     | 0.07     | 1       | 1.74  | 0.59 | 0     | 1.91  | 0.34 | 0 |
|     | 0.08     | 1 b1101 | 1.41  | 0.37 | 1     | 1.16  | 0.35 | 1 |
|     | 0.16     | 1 b3865 | 0.89  | 0.22 | 0     | 1.06  | 0.49 | 1 |
|     | 0.05     | 1       | 30.91 | 4.64 | 1     | 28.14 | 7.32 | 1 |
|     | 0.04     | 1 b0781 | 1.32  | 0.32 | 0     | 1.32  | 0.82 | 0 |
|     | 0.11     | 1       | 1.4   | 0.53 | 0     | 2.02  | 0.63 | 0 |
|     | 0.11     | 1 b2437 | 1.12  | 0.94 | 0     | 1.34  | 0.62 | 0 |
|     | 0.1      | 1       | 1.79  | 0.35 | 0     | 0.97  | 0.15 | 1 |
|     | 0.1      | 1 b0637 | 0.57  | 0.27 | 1     | 1.11  | 1.53 | 1 |
|     | 0.14     | 1       | 1.92  | 0.54 | 0     | 1.89  | 1.46 | 0 |
|     | 0.04     | 1 b2021 | 0.88  | 0.46 | 0     | 1.3   | 0.33 | 1 |
|     | 0.07     | 1 b1290 | 1.08  | 0.44 | 0     | 1.43  | 0.46 | 0 |
|     | 0.06     | 1 b0385 | 1.77  | 0.55 | 0     | 1.89  | 0.47 | 0 |

|      |         |      |      |   |      |      |   |
|------|---------|------|------|---|------|------|---|
| 0.13 | 0       | 1.36 | 0.67 | 0 | 1.63 | 2.88 | 0 |
| 0.06 | n/a     | 1.34 | 0.31 | 0 | 1.24 | 0.57 | 0 |
| 0.05 | 1 b0660 | 0.44 | 0.37 | 1 | 0.52 | 0.43 | 1 |
| 0.09 | 1 b4108 | 0.58 | 0.32 | 0 | 1.14 | 0.52 | 1 |
| 0.03 | 1 b1875 | 0.96 | 0.2  | 0 | 1.36 | 0.46 | 0 |
| 0.1  | 1       | 1.57 | 0.45 | 0 | 2.02 | 0.75 | 0 |
| 0.19 | 1       | 1.5  | 0.26 | 0 | 1.88 | 0.56 | 0 |
| 0.12 | 1       | 2.26 | 0.97 | 0 | 1.8  | 0.62 | 0 |
| 0.16 | 1       | 1.24 | 0.45 | 0 | 1.51 | 0.87 | 0 |
| 0.17 | 1 b3733 | 0.38 | 0.09 | 1 | 0.11 | 0.05 | 1 |
| 0.07 | 1       | 1.32 | 0.32 | 1 | 0.35 | 0.19 | 1 |
| 0.07 | 1 b0789 | 1.21 | 0.53 | 0 | 1.49 | 0.87 | 0 |
| 0.06 | 1 b0413 | 1.58 | 0.32 | 1 | 1.32 | 0.37 | 1 |
| 0.1  | 1 b3908 | 4.29 | 0.92 | 1 | 2.55 | 2.74 | 1 |
| 0.07 | 1       | 2    | 0.37 | 0 | 2.1  | 0.59 | 0 |
| 0.1  | 1 b1304 | 1.11 | 0.72 | 0 | 1.15 | 0.91 | 1 |
| 0.07 | 1 b2614 | 1    | 0.49 | 0 | 1    | 0.34 | 1 |
| 0.08 | 1 b3303 | 0.4  | 0.04 | 1 | 0.2  | 0.34 | 1 |
| 0.15 | 1 b3632 | 0.81 | 0.21 | 1 | 0.71 | 0.27 | 1 |
| 0.07 | 1 b3850 | 1    | 0.32 | 1 | 1.06 | 0.44 | 1 |
| 0.08 | 1 b2569 | 0.61 | 0.25 | 1 | 0.69 | 0.25 | 1 |
| 0.05 | 1       | 1.21 | 0.21 | 0 | 1.2  | 0.56 | 1 |
| 0.09 | 1 b3783 | 0.66 | 0.1  | 1 | 0.46 | 0.15 | 1 |
| 0.14 | 1 b1946 | 1.31 | 0.28 | 0 | 1.15 | 0.62 | 0 |
| 0.04 | 1       | 0.27 | 0.05 | 1 | 0.41 | 1.29 | 1 |
| 0.08 | 1 b2329 | 0.64 | 0.26 | 0 | 0.79 | 0.23 | 1 |
| 0.07 | 1 b2284 | 0.5  | 0.08 | 1 | 0.26 | 0.19 | 1 |
| 0.07 | 1 b3642 | 0.78 | 0.32 | 0 | 0.99 | 0.34 | 1 |
| 0.13 | 1       | 1.3  | 0.36 | 0 | 1.12 | 0.8  | 1 |
| 0.09 | 1       | 1.34 | 0.64 | 0 | 1.29 | 0.68 | 0 |
| 0.2  | 1 b3903 | 1.56 | 0.52 | 0 | 1.76 | 0.37 | 0 |
| 0.11 | 0 b3836 | 0.68 | 0.73 | 1 | 0.54 | 0.32 | 1 |
| 0.14 | 1 b3019 | 0.65 | 0.6  | 0 | 0.93 | 0.37 | 1 |
| 0.06 | 1 b2393 | 1.23 | 0.33 | 0 | 1.23 | 0.38 | 0 |
| 0.07 | 1 b3767 | 1.38 | 0.4  | 0 | 1.49 | 0.43 | 0 |
| 0.09 | 1 b0061 | 1.52 | 0.58 | 0 | 1.8  | 0.27 | 0 |
| 0.1  | n/a     | 1.05 | 0.71 | 0 | 1.78 | 0.81 | 0 |
| 0.08 | 1       | 1.62 | 0.5  | 0 | 2.21 | 0.78 | 0 |
| 0.07 | 1       | 1.4  | 0.54 | 0 | 1.73 | 0.4  | 0 |
| 0.07 | 1 b0514 | 1.66 | 0.6  | 0 | 1.55 | 0.74 | 0 |
| 0.1  | n/a     | 2.64 | 0.86 | 1 | 1.6  | 1.33 | 0 |
| n/a  | n/a     | n/a  | n/a  | 0 | n/a  | n/a  | 0 |
| 0.04 | 1       | 1.26 | 0.47 | 0 | 1.62 | 0.57 | 0 |
| 0.07 | 1 b1274 | 0.88 | 0.21 | 1 | 0.57 | 0.42 | 1 |
| n/a  | n/a     | n/a  | n/a  | 0 | n/a  | n/a  | 0 |
| 0.04 | 1 b1804 | 1.24 | 0.54 | 0 | 1.33 | 1    | 0 |
| 0.06 | 1 b1380 | 1.57 | 0.36 | 0 | 1.43 | 0.52 | 0 |
| 0.07 | 1       | 1.54 | 0.65 | 0 | 1.7  | 0.83 | 0 |
| 0.09 | 1       | 1.31 | 0.38 | 0 | 1.42 | 0.29 | 0 |
| 0.07 | 1 b1861 | 0.68 | 0.48 | 0 | 1.32 | 0.34 | 0 |
| 0.08 | 1 b0523 | 0.65 | 0.25 | 0 | 1.01 | 0.34 | 1 |
| 0.06 | 1       | 0.89 | 0.32 | 0 | 0.99 | 0.39 | 1 |

|     |      |           |      |      |       |      |      |   |
|-----|------|-----------|------|------|-------|------|------|---|
|     | 0.05 | 1 b1344   | 0.64 | 0.17 | 0     | 1.27 | 0.47 | 0 |
|     | 0.07 | 1         | 2.65 | 0.6  | 1     | 2.09 | 0.77 | 1 |
|     | 0.04 | 1         | 1.36 | 0.44 | 0     | 1.3  | 0.81 | 0 |
|     | 0.79 | 0 b1219   | 1    | 0.19 | 0     | 1.31 | 0.54 | 0 |
|     | 0.07 | 1 b1433   | 1.26 | 0.37 | 0     | 1.94 | 0.48 | 0 |
| n/a | n/a  |           | n/a  | n/a  | 0 n/a | n/a  |      | 0 |
|     | 0.09 | 1 b1863   | 1    | 0.4  | 0     | 1.21 | 0.56 | 0 |
|     | 0.12 | 1         | 1.3  | 0.25 | 0     | 2.24 | 2.74 | 0 |
|     | 0.09 | 1 b2812   | 0.87 | 0.26 | 0     | 1.22 | 0.34 | 1 |
| n/a | n/a  |           | n/a  | n/a  | 0 n/a | n/a  |      | 0 |
| n/a | n/a  |           | n/a  | n/a  | 0 n/a | n/a  |      | 0 |
|     | 0.16 | n/a       | 2.16 | 1.17 | 0     | 1.76 | 0.59 | 0 |
|     | 0.15 | 1 b3780   | 0.79 | 0.41 | 0     | 1.53 | 0.77 | 0 |
|     | 0.17 | 1 b3565   | 1.22 | 0.31 | 0     | 1.05 | 0.21 | 1 |
|     | 0.03 | n/a       | 0.73 | 0.34 | 1     | 0.52 | 0.46 | 1 |
|     | 0.11 | 1 b2794   | 1.06 | 0.12 | 0     | 1.54 | 0.41 | 0 |
|     | 0.12 | 1 b2619   | 1.27 | 0.54 | 1     | 1.14 | 0.3  | 1 |
|     | 0.09 | 1 b2903   | 0.4  | 0.1  | 1     | 0.15 | 0.22 | 1 |
|     | 0.09 | 1 b2957   | 0.77 | 0.09 | 1     | 0.27 | 1.09 | 1 |
|     | 0.04 | 1 b3967   | 0.86 | 0.08 | 1     | 0.7  | 0.38 | 1 |
|     | 0.1  | 1 b2960   | 0.55 | 0.22 | 1     | 0.69 | 0.21 | 1 |
|     | 0.08 | n/a       | 1.37 | 0.37 | 0     | 1.52 | 0.56 | 0 |
|     | 0.09 | n/a b2171 | 0.45 | 0.25 | 1     | 0.43 | 0.18 | 1 |
|     | 0.1  | 0 b2667   | 1.76 | 0.37 | 0     | 1.4  | 0.62 | 0 |
|     | 0.06 | 1 b1303   | 1.32 | 0.16 | 0     | 1.61 | 0.47 | 0 |
|     | 0.11 | 1 b2889   | 1.01 | 0.46 | 0     | 1.49 | 0.39 | 0 |
|     | 0.03 | 1 b0328   | 1.58 | 0.2  | 0     | 2.43 | 1.1  | 0 |
|     | 0.2  | 1         | 1.41 | 0.45 | 0     | 1.34 | 0.3  | 0 |
|     | 0.09 | 1 b2158   | 1.42 | 0.93 | 0     | 2.02 | 0.86 | 0 |
| n/a | n/a  |           | n/a  | n/a  | 0 n/a | n/a  |      | 0 |
|     | 0.06 | 1 b2126   | 0.93 | 0.24 | 0     | 1.43 | 0.41 | 0 |
|     | 0.09 | 1 b2154   | 0.36 | 0.11 | 1     | 0.53 | 0.34 | 1 |
|     | 0.08 | 1 b2050   | 1.48 | 0.46 | 0     | 1.52 | 0.7  | 0 |
|     | 0.05 | 1 b2130   | 1.3  | 0.18 | 0     | 1.79 | 0.44 | 0 |
|     | 0.39 | 1 b3605   | 1.65 | 0.31 | 0     | 1.55 | 0.68 | 0 |
|     | 0.09 | 1 b3320   | 0.27 | 0.05 | 1     | 0.1  | 0.05 | 1 |
|     | 0.08 | 1 b4169   | 1.06 | 0.28 | 1     | 1.39 | 0.27 | 0 |
|     | 0.12 | 1 b3313   | 0.3  | 0.08 | 1     | 0.17 | 0.04 | 1 |
|     | 0.09 | 1         | 1    | 0.05 | 1     | 1.18 | 0.3  | 1 |
|     | 0.09 | 1 b4190   | 1.13 | 0.35 | 0     | 1.4  | 0.21 | 0 |
|     | 0.08 | 1         | 1.33 | 0.49 | 0     | 1.34 | 0.56 | 0 |
|     | 0.17 | 1 b4146   | 0.66 | 0.21 | 1     | 1.1  | 0.46 | 1 |
|     | 0.08 | 1 b2123   | 1.26 | 0.7  | 0     | 2.03 | 0.62 | 0 |
|     | 0.07 | 1 b0657   | 0.8  | 0.5  | 0     | 1.28 | 0.2  | 1 |
|     | 0.13 | 1 b2944   | 1.06 | 0.23 | 0     | 1.84 | 0.56 | 0 |
|     | 0.05 | 1 b0962   | 0.95 | 0.15 | 0     | 1.1  | 0.68 | 1 |
|     | 0.21 | 1 b0763   | 1.81 | 0.46 | 0     | 1.64 | 0.52 | 0 |
|     | 0.06 | 1 b0830   | 1.62 | 0.32 | 1     | 1.54 | 0.26 | 1 |
|     | 0.07 | 1 b3205   | 0.8  | 0.12 | 1     | 0.43 | 0.21 | 1 |
|     | 0.04 | 1 b0772   | 0.56 | 0.27 | 1     | 0.7  | 0.28 | 1 |
|     | 0.07 | 1 b0807   | 1.39 | 0.58 | 0     | 1.68 | 0.19 | 0 |
|     | 0.15 | 1 b2904   | 0.2  | 0.05 | 1     | 0.1  | 0.06 | 1 |

|     |      |     |       |      |      |   |      |      |   |
|-----|------|-----|-------|------|------|---|------|------|---|
|     | 0.07 | 1   | b0214 | 0.88 | 0.24 | 0 | 1.37 | 0.33 | 1 |
|     | 0.08 | 1   | b3087 | 0.85 | 0.24 | 0 | 1.17 | 0.55 | 0 |
|     | 0.07 | 1   |       | 1.6  | 0.4  | 0 | 1.68 | 0.66 | 0 |
|     | 0.12 | 1   | b0796 | 1.01 | 0.69 | 0 | 1.24 | 0.5  | 1 |
|     | 0.06 | 1   | b0842 | 1.22 | 0.25 | 0 | 1.21 | 0.47 | 1 |
|     | 0.14 | 1   |       | 1.32 | 0.46 | 0 | 2.11 | 1.09 | 0 |
| n/a | n/a  |     |       | n/a  | n/a  | 0 | n/a  | n/a  | 0 |
| n/a | n/a  |     |       | n/a  | n/a  | 0 | n/a  | n/a  | 0 |
|     | 0.09 | 1   |       | 1.35 | 0.18 | 1 | 1.42 | 0.28 | 1 |
|     | 0.18 | 0   |       | 1.83 | 0.4  | 0 | 1.81 | 0.33 | 0 |
| n/a | n/a  |     |       | n/a  | n/a  | 0 | n/a  | n/a  | 0 |
|     | 0.17 | 1   | b4026 | 1.55 | 0.19 | 0 | 1.98 | 0.82 | 0 |
| n/a | n/a  |     |       | n/a  | n/a  | 0 | n/a  | n/a  | 0 |
|     | 0.11 | 1   | b4012 | 1.24 | 0.1  | 1 | 1.03 | 0.47 | 1 |
|     | 0.05 | 1   |       | 1.37 | 0.2  | 0 | 1.43 | 0.39 | 0 |
| n/a | n/a  |     |       | n/a  | n/a  | 0 | n/a  | n/a  | 0 |
| n/a | n/a  |     |       | n/a  | n/a  | 0 | n/a  | n/a  | 0 |
|     | 0.13 | 1   |       | 1.34 | 0.46 | 0 | 1.58 | 0.55 | 0 |
|     | 0.1  | 1   | b3165 | 0.38 | 0.08 | 1 | 0.46 | 0.13 | 1 |
|     | 0.14 | 1   | b2897 | 0.95 | 0.53 | 1 | 0.82 | 0.19 | 1 |
|     | 0.06 | 1   |       | 1.11 | 2    | 0 | 2.08 | 0.77 | 0 |
|     | 0.05 | 1   | b1447 | 1.74 | 0.53 | 0 | 1.85 | 0.89 | 0 |
|     | 0.06 | 1   |       | 0.97 | 0.27 | 0 | 1.27 | 0.26 | 1 |
|     | 0.06 | 1   |       | 1.33 | 1.71 | 0 | 1.29 | 0.59 | 0 |
|     | 0.08 | 1   | b3267 | 1.11 | 0.23 | 0 | 1.38 | 0.53 | 0 |
|     | 0.15 | 1   | b0044 | 1.28 | 0.34 | 0 | 1.64 | 0.76 | 0 |
|     | 0.07 | 1   | b1586 | 1.31 | 0.56 | 0 | 1.53 | 0.27 | 1 |
|     | 0.22 | 1   | b2553 | 0.83 | 0.17 | 0 | 0.97 | 0.32 | 1 |
|     | 0.08 | n/a |       | 1.5  | 0.41 | 0 | 1.58 | 0.51 | 0 |
|     | 0.12 | 1   |       | 1.32 | 0.38 | 0 | 1.64 | 0.4  | 1 |
| n/a | n/a  |     |       | n/a  | n/a  | 0 | n/a  | n/a  | 0 |
|     | 0.07 | 1   | b2495 | 0.81 | 0.11 | 1 | 1.16 | 0.21 | 1 |
|     | 0.13 | 1   | b2525 | 0.54 | 0.13 | 1 | 0.55 | 0.16 | 1 |
|     | 0.12 | 1   |       | 1.35 | 0.25 | 0 | 1.44 | 0.47 | 0 |
|     | 0.19 | 1   | b0631 | 1.06 | 0.15 | 1 | 1.3  | 0.45 | 1 |
|     | 0.1  | 1   | b2258 | 1.05 | 0.18 | 1 | 1.02 | 0.32 | 1 |
| n/a | n/a  |     |       | n/a  | n/a  | 0 | n/a  | n/a  | 0 |
| n/a | n/a  |     |       | n/a  | n/a  | 0 | n/a  | n/a  | 0 |
| n/a | n/a  |     |       | n/a  | n/a  | 0 | n/a  | n/a  | 0 |
|     | 0.1  | n/a |       | 2.39 | 1.28 | 0 | 1.75 | 0.73 | 0 |
|     | 0.13 | 0   |       | 1.89 | 0.61 | 0 | 1.97 | 1.03 | 0 |
| n/a | n/a  |     |       | n/a  | n/a  | 0 | n/a  | n/a  | 0 |
| n/a | n/a  |     |       | n/a  | n/a  | 0 | n/a  | n/a  | 0 |
| n/a | n/a  |     |       | n/a  | n/a  | 0 | n/a  | n/a  | 0 |
| n/a | n/a  |     |       | n/a  | n/a  | 0 | n/a  | n/a  | 0 |
| n/a | n/a  |     |       | n/a  | n/a  | 0 | n/a  | n/a  | 0 |
|     | 0.09 | n/a | b0463 | 0.45 | 0.05 | 1 | 0.45 | 0.15 | 1 |
|     | 0.08 | n/a | b0484 | 2.85 | 0.57 | 1 | 1.36 | 0.55 | 1 |
|     | 0.05 | n/a |       | 1.24 | 0.15 | 0 | 1.72 | 0.53 | 0 |
|     | 0.16 | n/a |       | 1.43 | 0.27 | 0 | 1.15 | 0.28 | 1 |
|     | 0.09 | n/a |       | 0.84 | 0.35 | 1 | 1.32 | 1.5  | 1 |
|     | 0.11 | 1   | b1113 | 0.66 | 0.27 | 1 | 1.13 | 0.15 | 1 |

|      |     |       |      |      |   |      |      |   |
|------|-----|-------|------|------|---|------|------|---|
| 0.05 | 1   |       | 1.53 | 0.17 | 0 | 1.44 | 0.51 | 0 |
| 0.09 | 1   |       | 1.15 | 0.6  | 0 | 1.33 | 0.56 | 0 |
| 0.03 | 1   |       | 1.55 | 0.81 | 0 | 1.28 | 0.62 | 0 |
| 0.07 | 0   |       | 1.42 | 0.45 | 0 | 1.45 | 0.72 | 0 |
| 0.03 | 1   |       | 1.51 | 0.5  | 0 | 2    | 0.75 | 0 |
| 0.06 | 1   |       | 1.34 | 0.34 | 0 | 1.3  | 0.54 | 0 |
| 0.06 | 1   |       | 1.33 | 0.44 | 0 | 1.68 | 0.94 | 0 |
| 0.08 | 1   |       | 1.38 | 0.22 | 0 | 1.23 | 0.39 | 1 |
| 0.1  | 1   |       | 1.58 | 0.44 | 0 | 1.71 | 0.85 | 0 |
| 0.06 | n/a |       | 1.54 | 0.26 | 0 | 1.75 | 0.37 | 0 |
| 0.09 | n/a |       | 1.51 | 0.44 | 0 | 2.15 | 0.76 | 0 |
| 0.05 | 1   |       | 1.36 | 0.39 | 0 | 1.67 | 7.99 | 0 |
| 0.08 | 1   |       | 1.15 | 0.79 | 0 | 1.17 | 0.4  | 1 |
| 0.06 | 1   |       | 1.45 | 0.23 | 0 | 1.84 | 0.36 | 0 |
| 0.03 | n/a |       | 1.33 | 0.38 | 0 | 1.47 | 0.41 | 0 |
| 0.04 | 1   |       | 1.59 | 0.34 | 0 | 1.58 | 1.4  | 0 |
| 0.05 | 1   |       | 1.29 | 0.29 | 0 | 1.71 | 0.62 | 0 |
| 0.08 | 1   |       | 1.42 | 0.26 | 0 | 1.13 | 0.59 | 0 |
| 0.14 | 1   |       | 1.35 | 0.36 | 0 | 2.06 | 0.82 | 0 |
| 0.06 | 1   |       | 1.22 | 0.29 | 0 | 1.59 | 0.43 | 0 |
| 0.1  | 1   |       | 1.74 | 0.4  | 0 | 1.46 | 0.41 | 0 |
| 0.1  | 1   |       | 1.74 | 0.68 | 0 | 1.64 | 0.79 | 0 |
| 0.08 | 1   |       | 1.76 | 0.25 | 1 | 1.2  | 0.51 | 1 |
| 0.08 | 1   |       | 1.49 | 0.4  | 0 | 1.66 | 0.42 | 0 |
| 0.06 | 1   |       | 1.88 | 0.37 | 1 | 1.12 | 1.07 | 1 |
| 0.05 | 1   |       | 1.07 | 0.15 | 1 | 0.65 | 0.23 | 1 |
| 0.05 | 1   |       | 1.3  | 0.48 | 0 | 1.5  | 0.73 | 0 |
| 0.09 | 1   |       | 1.39 | 0.45 | 0 | 1.37 | 0.31 | 0 |
| 0.12 | 1   |       | 1.51 | 0.49 | 0 | 1.36 | 0.33 | 0 |
| 0.09 | 1   |       | 1.54 | 0.34 | 0 | 1.85 | 0.54 | 0 |
| 0.12 | 1   |       | 2.17 | 0.5  | 1 | 0.95 | 0.41 | 1 |
| 0.13 | n/a |       | 1.18 | 0.16 | 0 | 1.27 | 0.53 | 1 |
| 0.05 | 1   |       | 1.31 | 0.26 | 0 | 1.3  | 0.6  | 1 |
| 0.08 | 1   |       | 1.23 | 0.61 | 0 | 1.57 | 0.62 | 0 |
| 0.1  | 1   |       | 1.26 | 0.27 | 0 | 1.57 | 0.9  | 1 |
| 0.11 | 1   | b2891 | 0.52 | 0.07 | 1 | 0.24 | 0.19 | 1 |
| 0.07 | 1   |       | 1.65 | 0.31 | 0 | 1.19 | 0.48 | 1 |
| 0.13 | 1   |       | 1.04 | 2.23 | 0 | 1.04 | 0.42 | 1 |
| 0.1  | 1   |       | 1.54 | 0.41 | 0 | 1.14 | 0.42 | 1 |
| 0.14 | 1   | b0085 | 1.4  | 0.38 | 1 | 1.05 | 1.06 | 1 |
| 0.1  | 1   | b0118 | 0.62 | 0.13 | 1 | 0.36 | 0.24 | 1 |
| 0.09 | 1   |       | 1.39 | 0.29 | 0 | 1.58 | 0.37 | 0 |
| n/a  | n/a |       | n/a  | n/a  | 0 | n/a  | n/a  | 0 |
| 0.08 | 1   | b0152 | 1.39 | 1.91 | 0 | 2.21 | 0.69 | 0 |
| 0.08 | 1   | b0186 | 1.27 | 0.4  | 0 | 1.32 | 0.68 | 1 |
| 0.03 | 1   |       | 1.15 | 0.45 | 0 | 1.45 | 0.75 | 0 |
| n/a  | n/a |       | n/a  | n/a  | 0 | n/a  | n/a  | 0 |
| 0.37 | 0   | b0687 | 0.37 | 0.26 | 1 | 0.45 | 0.42 | 1 |
| 0.08 | 1   | b1929 | 1.31 | 0.1  | 0 | 1.6  | 0.75 | 0 |
| 0.21 | 1   | b3620 | 1.2  | 0.17 | 0 | 1.2  | 0.69 | 1 |
| 0.05 | 1   |       | 1.13 | 0.57 | 0 | 1.47 | 6.07 | 0 |
| 0.09 | 1   | b1262 | 1.28 | 0.18 | 0 | 1.54 | 0.64 | 0 |

|     |          |         |     |      |      |       |      |       |   |
|-----|----------|---------|-----|------|------|-------|------|-------|---|
|     | 0.1      | 1       |     | 1.14 | 0.42 | 0     | 1.56 | 0.73  | 0 |
|     | 0.07     | 1 b3724 |     | 0.75 | 0.17 | 1     | 0.89 | 0.29  | 1 |
|     | 0.18     | 1       |     | 1.78 | 0.4  | 0     | 1.39 | 18.24 | 0 |
|     | 0.08     | 1 b2961 |     | 0.9  | 0.52 | 0     | 1.02 | 0.75  | 1 |
|     | 0.23     | 0 b3194 |     | 1.57 | 0.29 | 0     | 1.36 | 0.7   | 0 |
|     | 0.17     | 1 b3233 |     | 1.5  | 0.62 | 1     | 1.17 | 0.46  | 1 |
|     | 0.1      | 1 b0627 |     | 1.73 | 0.51 | 0     | 1.53 | 0.69  | 0 |
| n/a | n/a      |         | n/a | n/a  |      | 0 n/a | n/a  |       | 0 |
|     | 0.16     | 0 b1050 |     | 1.55 | 0.48 | 0     | 1.54 | 0.85  | 0 |
|     | 0.15     | 0 b3400 |     | 1.4  | 0.74 | 0     | 1.01 | 1.07  | 1 |
| n/a | n/a      |         | n/a | n/a  |      | 0 n/a | n/a  |       | 0 |
|     | 0.12     | 1 b3439 |     | 2.06 | 0.83 | 0     | 1.79 | 0.86  | 0 |
|     | 0.09     | 1 b4359 |     | 0.84 | 0.27 | 0     | 1.21 | 0.67  | 1 |
|     | 0.19     | 1 b1102 |     | 1.4  | 0.38 | 0     | 1.35 | 0.46  | 1 |
| n/a | n/a      |         | n/a | n/a  |      | 0 n/a | n/a  |       | 0 |
|     | 0.1 n/a  | b3448   |     | 1.71 | 0.36 | 0     | 1.94 | 0.3   | 1 |
|     | 0.15     | 1 b4363 |     | 1.42 | 0.4  | 0     | 1.72 | 0.9   | 0 |
|     | 0.09     | 1 b4395 |     | 0.64 | 0.42 | 0     | 0.82 | 1.26  | 1 |
| n/a | n/a      |         | n/a | n/a  |      | 0 n/a | n/a  |       | 0 |
|     | 0.1      | 1 b3469 |     | 1.23 | 0.29 | 1     | 0.92 | 0.72  | 1 |
| n/a | n/a      |         | n/a | n/a  |      | 0 n/a | n/a  |       | 0 |
| n/a | n/a      |         | n/a | n/a  |      | 0 n/a | n/a  |       | 0 |
| n/a | n/a      |         | n/a | n/a  |      | 0 n/a | n/a  |       | 0 |
| n/a | n/a      |         | n/a | n/a  |      | 0 n/a | n/a  |       | 0 |
|     | 0.23     | 1       |     | 1.23 | 0.34 | 0     | 1.62 | 0.47  | 0 |
|     | 0.08     | 1 b4050 |     | 1.26 | 0.3  | 0     | 1.88 | 0.45  | 0 |
|     | 0.11     | 1 b4116 |     | 1.31 | 0.35 | 0     | 1.18 | 0.52  | 1 |
|     | 0.09     | 1 b0845 |     | 1.33 | 0.35 | 0     | 1.82 | 0.45  | 0 |
| n/a | n/a      |         | n/a | n/a  |      | 0 n/a | n/a  |       | 0 |
|     | 0.15     | 1 b2467 |     | 1.33 | 0.52 | 0     | 2.22 | 1.32  | 0 |
| n/a | n/a      |         | n/a | n/a  |      | 0 n/a | n/a  |       | 0 |
|     | 0.08     | 1 b2435 |     | 1.04 | 0.26 | 0     | 0.82 | 0.8   | 1 |
|     | 0.07     | 1 b0872 |     | 1.38 | 0.45 | 0     | 1.81 | 0.6   | 1 |
|     | 0.07     | 1 b0899 |     | 1.26 | 0.54 | 0     | 1.4  | 0.34  | 0 |
|     | 0.07     | 1 b0924 |     | 0.98 | 0.18 | 1     | 0.67 | 0.27  | 1 |
| n/a | n/a      |         | n/a | n/a  |      | 0 n/a | n/a  |       | 0 |
|     | 0.14 n/a | b3933   |     | 0.49 | 0.67 | 1     | 0.66 | 0.74  | 1 |
| n/a | n/a      |         | n/a | n/a  |      | 0 n/a | n/a  |       | 0 |
|     | 0.17     | 1 b4154 |     | 0.96 | 0.97 | 1     | 0.69 | 0.47  | 1 |
|     | 0.19     | 1 b2405 |     | 1.15 | 0.28 | 0     | 1.33 | 0.9   | 0 |
| n/a | n/a      |         | n/a | n/a  |      | 0 n/a | n/a  |       | 0 |
|     | 0.09     | 1 b2521 |     | 1.24 | 0.42 | 0     | 1.44 | 0.87  | 0 |
|     | 0.19     | 1 b2560 |     | 1.28 | 0.25 | 0     | 1.57 | 0.67  | 0 |
|     | 0.08     | 1 b4130 |     | 2.86 | 0.95 | 1     | 1.54 | 1.13  | 0 |
|     | 0.1      | 1 b4161 |     | 1.13 | 0.3  | 0     | 1.53 | 0.43  | 1 |
|     | 0.1      | 1       |     | 1.5  | 0.43 | 1     | 1.12 | 0.27  | 1 |
|     | 0.07     | 1 b2276 |     | 0.36 | 0.06 | 1     | 0.72 | 0.5   | 1 |
|     | 0.09     | 1       |     | 1.34 | 0.53 | 0     | 1.44 | 0.45  | 0 |
|     | 0.07     | 1 b1096 |     | 1.25 | 0.38 | 0     | 1.45 | 0.73  | 1 |
|     | 0.06     | 0       |     | 1.73 | 0.33 | 0     | 2.33 | 0.72  | 0 |
|     | 0.08 n/a | b3339   |     | 0.42 | 0.19 | 1     | 0.11 | 0.04  | 1 |
|     | 0.04     | 1 b1594 |     | 1.12 | 0.31 | 0     | 1.58 | 0.7   | 1 |

|     |         |         |     |       |       |       |      |      |   |
|-----|---------|---------|-----|-------|-------|-------|------|------|---|
|     | 0.17    | 1       |     | 1.32  | 0.19  | 0     | 2.2  | 0.57 | 0 |
|     | 0.06    | 1 b1645 |     | 1.33  | 0.33  | 0     | 2.19 | 1.36 | 0 |
|     | 0.06    | 1 b4207 |     | 1     | 2.77  | 0     | 1.32 | 0.58 | 1 |
|     | 0.13    | 1 b0076 |     | 1.34  | 0.42  | 0     | 1.68 | 0.54 | 0 |
|     | 0.2 n/a |         |     | 1.3   | 0.55  | 0     | 1.79 | 0.97 | 0 |
| n/a | n/a     |         | n/a | n/a   |       | 0 n/a | n/a  |      | 0 |
| n/a | n/a     |         | n/a | n/a   |       | 0 n/a | n/a  |      | 0 |
|     | 0.08    | 1       |     | 1.52  | 0.35  | 0     | 1.89 | 0.74 | 0 |
|     | 0.15    | 1       |     | 1.65  | 0.43  | 0     | 2.2  | 1    | 0 |
|     | 0.13    | 1       |     | 1.34  | 0.42  | 1     | 1.4  | 0.65 | 1 |
| n/a | n/a     |         | n/a | n/a   |       | 0 n/a | n/a  |      | 0 |
|     | 0.05    | 1       |     | 1.3   | 0.38  | 0     | 1.49 | 0.62 | 0 |
|     | 0.08    | 1 b1088 |     | 0.51  | 0.19  | 1     | 0.27 | 0.08 | 1 |
|     | 0.04    | 1 b1708 |     | 1.16  | 0.37  | 0     | 1.4  | 0.78 | 0 |
|     | 0.1     | 0 b0969 |     | 1.12  | 0.17  | 0     | 1.75 | 1.23 | 0 |
|     | 0.07    | 1       |     | 1.61  | 1.24  | 0     | 1.72 | 0.48 | 0 |
|     | 0.08    | 1 b0185 |     | 0.47  | 0.26  | 1     | 0.62 | 0.21 | 1 |
|     | 0.08    | 1       |     | 0.86  | 0.23  | 1     | 0.19 | 0.05 | 1 |
|     | 0.1     | 1 b0115 |     | 1.73  | 0.43  | 1     | 1.1  | 0.3  | 1 |
|     | 0.12    | 1       |     | 1.51  | 0.17  | 0     | 1.61 | 0.39 | 1 |
| n/a | n/a     |         | n/a | n/a   |       | 0 n/a | n/a  |      | 0 |
|     | 0.1     | 1       |     | 0.32  | 0.21  | 1     | 0.38 | 0.26 | 1 |
|     | 0.15    | 0 b1626 |     | 0.89  | 0.29  | 0     | 1.54 | 0.54 | 0 |
|     | 0.12    | 1 b1596 |     | 1.4   | 0.46  | 0     | 1.51 | 0.64 | 0 |
|     | 0.13    | 1 b4034 |     | 1.06  | 0.32  | 0     | 0.74 | 0.63 | 1 |
|     | 0.1     | 1       |     | 0.77  | 0.27  | 1     | 0.6  | 0.87 | 1 |
|     | 0.05    | 1 b0378 |     | 1.59  | 0.49  | 0     | 1.81 | 0.9  | 0 |
|     | 0.05    | 1 b0408 |     | 0.51  | 0.15  | 1     | 0.72 | 0.29 | 1 |
|     | 0.08    | 1 b0086 |     | 1.59  | 0.35  | 1     | 1.37 | 0.38 | 1 |
|     | 0.14    | 1       |     | 0.81  | 0.21  | 0     | 1    | 0.42 | 1 |
|     | 0.11    | 1       |     | 1.01  | 0.22  | 0     | 1.31 | 0.66 | 1 |
|     | 0.07    | 1 b1683 |     | 42.83 | 25.98 | 1     | 16   | 8.76 | 1 |
|     | 0.12    | 1 b3455 |     | 1.33  | 0.34  | 0     | 2.29 | 0.58 | 0 |
|     | 0.15    | 1 b0449 |     | 1.62  | 0.43  | 0     | 1.6  | 1.46 | 1 |
|     | 0.08    | 1 b0576 |     | 1.06  | 0.63  | 0     | 1.44 | 0.44 | 0 |
|     | 0.09    | 1       |     | 1.35  | 0.34  | 0     | 1.73 | 0.78 | 0 |
|     | 0.09    | 1       |     | 1.57  | 0.13  | 0     | 1.57 | 0.8  | 0 |
|     | 0.09    | 1 b2578 |     | 1.35  | 0.39  | 0     | 1.44 | 1.03 | 0 |
|     | 0.1     | 1 b3548 |     | 1.64  | 0.25  | 0     | 2.55 | 0.82 | 0 |
|     | 0.16    | 1 b3159 |     | 1.56  | 0.59  | 0     | 1.9  | 0.54 | 0 |
|     | 0.11    | 1 b2248 |     | 1.4   | 0.46  | 0     | 1.69 | 0.91 | 0 |
|     | 0.12    | 1 b2527 |     | 0.69  | 0.14  | 1     | 1.02 | 0.32 | 1 |
|     | 0.09    | 1       |     | 1.79  | 0.54  | 0     | 1.73 | 0.56 | 0 |
|     | 0.11    | 1 b4232 |     | 0.56  | 0.09  | 1     | 0.33 | 0.13 | 1 |
|     | 0.11    | 1       |     | 1.12  | 0.22  | 0     | 1.27 | 0.55 | 1 |
| n/a | n/a     |         | n/a | n/a   |       | 0 n/a | n/a  |      | 0 |
|     | 0.06    | 1 b4367 |     | 1.61  | 0.21  | 0     | 1.84 | 0.43 | 0 |
|     | 0.11    | 1 b3617 |     | 0.72  | 0.32  | 0     | 0.75 | 0.36 | 1 |
|     | 0.15    | 1 b3534 |     | 1.06  | 0.13  | 0     | 1.79 | 0.65 | 0 |
|     | 0.11    | 1 b3152 |     | 1.61  | 0.39  | 0     | 2.19 | 1.52 | 0 |
|     | 0.08    | 1 b2239 |     | 1.55  | 0.34  | 1     | 0.83 | 0.15 | 1 |
|     | 0.11    | 1 b2234 |     | 0.69  | 0.16  | 1     | 0.34 | 0.28 | 1 |

|          |         |     |      |      |       |      |      |   |
|----------|---------|-----|------|------|-------|------|------|---|
| 0.08     | 1       |     | 0.81 | 0.28 | 0     | 1.25 | 0.77 | 1 |
| 0.16     | 1 b3921 |     | 1.38 | 0.32 | 0     | 1.48 | 0.78 | 0 |
| 0.08     | 1       |     | 1.38 | 0.29 | 0     | 1.66 | 0.49 | 0 |
| 0.07     | 1 b0727 |     | 0.49 | 0.1  | 1     | 0.21 | 0.13 | 1 |
| 0.11     | 1 b3868 |     | 1.12 | 0.32 | 0     | 1.42 | 1.6  | 0 |
| 0.16     | 1 b3360 |     | 0.89 | 0.23 | 0     | 1.56 | 0.69 | 0 |
| 0.14     | 1 b3863 |     | 0.69 | 0.15 | 1     | 0.66 | 0.39 | 1 |
| 0.09     | 1 b0853 |     | 0.92 | 0.57 | 0     | 1.34 | 0.7  | 0 |
| 0.13     | 1 b3352 |     | 0.89 | 0.16 | 0     | 1.27 | 0.58 | 1 |
| 0.13     | 1 b4062 |     | 6.89 | 5.34 | 1     | 4.89 | 1.42 | 1 |
| 0.1      | 1 b2565 |     | 1.1  | 0.58 | 0     | 1.21 | 0.64 | 1 |
| 0.08     | 1 b1845 |     | 1.36 | 0.39 | 0     | 1.84 | 0.59 | 1 |
| 0.11     | 1       |     | 1.21 | 0.25 | 0     | 1.51 | 0.65 | 0 |
| 0.25     | 1 b3875 |     | 1.52 | 0.41 | 0     | 2.07 | 0.74 | 0 |
| 0.07     | 1 b1663 |     | 1.49 | 0.33 | 0     | 1.99 | 1.03 | 0 |
| 0.18 n/a |         |     | 1.26 | 0.32 | 0     | 1.58 | 1.21 | 0 |
| 0.13 n/a |         |     | 1.18 | 0.26 | 0     | 0.98 | 0.54 | 1 |
| 0.08     | 1 b2593 |     | 1.62 | 0.28 | 1     | 1.47 | 0.66 | 1 |
| 0.07     | 1 b0030 |     | 1.06 | 0.16 | 0     | 1.57 | 2.77 | 1 |
| 0.13 n/a |         |     | 1.34 | 0.45 | 0     | 1.95 | 4.02 | 0 |
| 0.22 n/a |         |     | 1.31 | 0.62 | 0     | 1.57 | 0.41 | 0 |
| 0.1      | 0       |     | 1.77 | 0.4  | 0     | 1.8  | 1.02 | 0 |
| 0.05 n/a |         |     | 1.53 | 0.77 | 0     | 2.01 | 0.44 | 0 |
| 0.38     | 0       |     | 1.58 | 0.36 | 0     | 1.76 | 0.5  | 0 |
| 0.06     | 1       |     | 1.57 | 0.35 | 0     | 1.56 | 0.66 | 0 |
| 0.13     | 1 b4073 |     | 1.6  | 0.23 | 0     | 1.75 | 0.55 | 0 |
| 0.08     | 1 b1870 |     | 0.6  | 0.29 | 0     | 1.04 | 0.41 | 1 |
| 0.19     | 0       |     | 1.29 | 0.81 | 0     | 1.76 | 1.26 | 0 |
| 0.12     | 1 b0010 |     | 1.07 | 0.51 | 0     | 1.68 | 0.49 | 0 |
| n/a      | n/a     | n/a | n/a  | n/a  | 0 n/a | n/a  | n/a  | 0 |
| 0.06     | 1 b0020 |     | 1.42 | 0.46 | 0     | 1.03 | 0.53 | 1 |
| 0.1      | 1 b3785 |     | 0.79 | 0.35 | 0     | 1    | 0.65 | 1 |
| 0.11     | 1 b3826 |     | 1.36 | 0.32 | 0     | 1.26 | 0.64 | 0 |
| 0.13     | 1 b3804 |     | 0.94 | 0.46 | 0     | 1    | 0.94 | 1 |
| 0.09     | 1 b2927 |     | 1.04 | 0.15 | 1     | 0.79 | 0.37 | 1 |
| 0.07     | 1 b1234 |     | 0.93 | 0.21 | 0     | 1.49 | 0.51 | 1 |
| 0.11 n/a |         |     | 2.03 | 0.64 | 0     | 1.72 | 1    | 0 |
| 0.08     | 1 b2842 |     | 1.41 | 0.39 | 0     | 2.41 | 0.84 | 0 |
| 0.08     | 1       |     | 3.36 | 0.72 | 1     | 1.42 | 0.4  | 1 |
| 0.16     | 1 b2811 |     | 1.65 | 0.43 | 0     | 1.99 | 0.56 | 0 |
| 0.11     | 1       |     | 1.33 | 0.51 | 0     | 2.3  | 0.84 | 0 |
| 0.12     | 1 b2795 |     | 1.33 | 0.2  | 1     | 0.68 | 0.09 | 1 |
| 0.09     | 1       |     | 2.21 | 0.52 | 0     | 1.96 | 0.57 | 1 |
| 0.05     | 1 b3829 |     | 1.21 | 0.51 | 0     | 2.37 | 0.58 | 0 |
| 0.1      | 1 b3811 |     | 1.02 | 0.22 | 0     | 1.16 | 0.57 | 1 |
| 0.02     | 1 b3786 |     | 0.63 | 0.35 | 0     | 0.59 | 0.39 | 1 |
| 0.1      | 1 b3973 |     | 1.24 | 0.21 | 0     | 1.04 | 0.35 | 1 |
| 0.04     | 1 b2822 |     | 1.26 | 0.28 | 0     | 0.86 | 0.46 | 1 |
| 0.06     | 1 b1247 |     | 1.72 | 0.13 | 0     | 1.47 | 0.84 | 0 |
| 0.14     | 1 b3919 |     | 0.36 | 0.22 | 1     | 0.19 | 0.14 | 1 |
| 0.07     | 1 b0469 |     | 1    | 0.42 | 0     | 1.29 | 0.67 | 1 |
| n/a      | n/a     | n/a | n/a  | n/a  | 0 n/a | n/a  | n/a  | 0 |



|      |     |       |      |      |   |      |       |   |
|------|-----|-------|------|------|---|------|-------|---|
| 0.06 | 1   | b0584 | 2.92 | 1    | 0 | 1.93 | 0.8   | 0 |
| 0.09 | 1   | b0906 | 0.89 | 1.18 | 0 | 1.83 | 0.98  | 0 |
| 0.08 | 1   |       | 1.57 | 0.54 | 0 | 1.42 | 0.79  | 0 |
| 0.07 | 1   |       | 1.19 | 0.38 | 0 | 1.59 | 0.64  | 0 |
| 0.11 | 1   | b1452 | 3.86 | 0.74 | 1 | 1.94 | 0.64  | 1 |
| n/a  | n/a |       | n/a  | n/a  | 0 | n/a  | n/a   | 0 |
| 0.09 | 1   | b1333 | 1.92 | 0.43 | 1 | 1.62 | 0.38  | 1 |
| n/a  | n/a |       | n/a  | n/a  | 0 | n/a  | n/a   | 0 |
| 0.03 | n/a |       | 1.24 | 0.41 | 0 | 1.69 | 0.42  | 0 |
| 0.09 | 1   |       | 1.64 | 0.2  | 0 | 1.66 | 0.23  | 0 |
| 0.05 | 1   |       | 1.02 | 0.58 | 0 | 1.3  | 0.33  | 1 |
| 0.04 | 1   |       | 0.88 | 0.32 | 0 | 0.99 | 0.32  | 1 |
| 0.07 | n/a |       | 1.3  | 0.36 | 0 | 2.16 | 0.67  | 0 |
| 0.06 | 1   |       | 1.95 | 0.92 | 0 | 2.28 | 0.97  | 0 |
| 0.09 | 1   | b1256 | 2.43 | 0.57 | 1 | 1.24 | 0.18  | 1 |
| 0.08 | 1   |       | 1.46 | 0.39 | 0 | 1.6  | 0.5   | 0 |
| 0.03 | 1   |       | 1.47 | 0.64 | 0 | 1.48 | 0.62  | 0 |
| 0.03 | 1   |       | 1.19 | 0.4  | 0 | 1.3  | 0.61  | 0 |
| 0.06 | 1   | b1321 | 1.08 | 0.14 | 0 | 2    | 0.96  | 0 |
| 0.06 | 1   | b2785 | 1.36 | 0.27 | 1 | 1.36 | 0.19  | 1 |
| 0.09 | 1   | b2832 | 0.84 | 0.23 | 0 | 1.8  | 0.5   | 0 |
| 0.05 | 1   |       | 1.27 | 0.31 | 0 | 1.67 | 0.11  | 1 |
| 0.11 | 1   | b2950 | 1.16 | 0.36 | 0 | 1.73 | 0.82  | 0 |
| 0.05 | 1   | b0436 | 0.24 | 0.29 | 1 | 0.13 | 0.1   | 1 |
| 0.12 | 1   | b3475 | 1.15 | 0.24 | 0 | 1.58 | 0.57  | 0 |
| 0.1  | 1   |       | 1.36 | 0.22 | 0 | 1.83 | 0.35  | 0 |
| 0.12 | 1   |       | 1.82 | 0.45 | 0 | 1.4  | 0.52  | 0 |
| 1.68 | 1   | b3024 | 1.43 | 0.28 | 0 | 1.3  | 0.47  | 0 |
| 0.07 | 1   | b2840 | 1.23 | 0.29 | 0 | 1.16 | 0.55  | 1 |
| n/a  | n/a |       | n/a  | n/a  | 0 | n/a  | n/a   | 0 |
| n/a  | n/a |       | n/a  | n/a  | 0 | n/a  | n/a   | 0 |
| 0.15 | 1   |       | 1.44 | 0.35 | 0 | 1.61 | 0.59  | 0 |
| 0.12 | 1   | b3572 | 1.35 | 0.32 | 0 | 1.42 | 0.32  | 0 |
| 0.08 | 1   |       | 1.48 | 0.25 | 1 | 1.56 | 0.54  | 1 |
| 0.09 | 1   | b3655 | 0.71 | 0.6  | 0 | 0.94 | 0.61  | 1 |
| 0.05 | 1   |       | 1.5  | 0.39 | 0 | 1.24 | 0.26  | 0 |
| 0.09 | 1   | b2725 | 1.09 | 0.54 | 0 | 1.89 | 0.35  | 0 |
| 0.09 | 1   |       | 1.71 | 1.26 | 0 | 1.4  | 1.8   | 1 |
| 0.07 | 1   | b2727 | 1.07 | 0.2  | 1 | 1.2  | 0.34  | 1 |
| 0.08 | 1   | b2142 | 1.39 | 0.42 | 0 | 1.76 | 0.49  | 0 |
| 0.03 | 1   |       | 2.63 | 0.67 | 1 | 1.03 | 0.34  | 1 |
| 0.13 | 1   |       | 0.45 | 0.13 | 1 | 0.95 | 0.32  | 1 |
| 0.12 | n/a |       | 1    | 0.32 | 0 | 1.55 | 0.78  | 0 |
| 0.03 | 1   | b2179 | 1.16 | 0.19 | 0 | 1.07 | 0.28  | 1 |
| 0.08 | 1   | b2101 | 1.03 | 0.15 | 0 | 1.48 | 0.23  | 0 |
| 0.04 | 1   | b1829 | 0.61 | 0.1  | 1 | 0.54 | 0.16  | 1 |
| 0.12 | 1   | b3298 | 0.33 | 0.11 | 1 | 0.22 | 0.09  | 1 |
| 0.09 | 1   | b3495 | 2.56 | 0.39 | 1 | 1.31 | 0.87  | 1 |
| 0.08 | 1   | b3228 | 1.01 | 0.59 | 1 | 1.21 | 0.56  | 1 |
| 0.06 | 1   | b3526 | 0.91 | 0.27 | 0 | 1.53 | 13.65 | 1 |
| 0.1  | 1   | b3415 | 1.34 | 0.57 | 0 | 1.67 | 0.45  | 0 |
| 0.07 | 1   |       | 1.18 | 0.22 | 0 | 1.39 | 0.26  | 0 |

|     |          |         |      |      |       |      |      |   |
|-----|----------|---------|------|------|-------|------|------|---|
|     | 0.12     | 1 b3031 | 0.78 | 0.17 | 1     | 0.98 | 0.29 | 1 |
|     | 0.07     | 1 b2707 | 1.64 | 0.32 | 1     | 1.53 | 4.86 | 1 |
|     | 0.04     | 1 b2146 | 1.38 | 0.33 | 0     | 1.67 | 0.39 | 0 |
|     | 0.17     | 1 b3009 | 1.38 | 0.31 | 1     | 1.34 | 0.62 | 1 |
|     | 0.06     | 0       | 1.48 | 0.32 | 0     | 1.97 | 0.12 | 0 |
|     | 0.03     | 1 b0723 | 0.32 | 0.09 | 1     | 0.2  | 0.03 | 1 |
|     | 0.06     | 1 b0780 | 1.2  | 0.35 | 0     | 1.74 | 0.73 | 0 |
| n/a | n/a      |         | n/a  | n/a  | 0 n/a | n/a  |      | 0 |
|     | 0.07     | 1 b1074 | 0.57 | 0.22 | 1     | 1.28 | 0.51 | 1 |
|     | 0.09     | 1 b0774 | 1.17 | 0.54 | 0     | 2.5  | 0.51 | 0 |
| n/a | n/a      |         | n/a  | n/a  | 0 n/a | n/a  |      | 0 |
|     | 0.05     | 1 b3220 | 1.3  | 0.36 | 0     | 1.64 | 0.57 | 0 |
|     | 0.12     | 1       | 1.92 | 0.93 | 0     | 2.32 | 0.76 | 0 |
|     | 0.04     | 1 b3038 | 0.45 | 0.19 | 1     | 0.45 | 0.2  | 1 |
|     | 0.08     | 1       | 1.57 | 0.36 | 0     | 1.65 | 0.46 | 0 |
|     | 0.15     | 1 b0814 | 0.69 | 0.12 | 1     | 0.26 | 0.11 | 1 |
|     | 0.18     | 1 b4194 | 1.62 | 0.4  | 0     | 1.59 | 0.49 | 0 |
| n/a | n/a      |         | n/a  | n/a  | 0 n/a | n/a  |      | 0 |
|     | 0.12     | 1 b0396 | 1.24 | 0.21 | 0     | 1.49 | 0.69 | 0 |
|     | 0.07 n/a | b4349   | 0.75 | 0.2  | 0     | 0.62 | 0.22 | 1 |
|     | 0.06     | 1 b0442 | 1.12 | 0.23 | 0     | 2.21 | 0.69 | 0 |
|     | 0.07     | 1       | 1.24 | 0.35 | 0     | 1.58 | 0.46 | 1 |
|     | 0.14 n/a |         | 1.59 | 0.42 | 0     | 1.62 | 0.79 | 1 |
|     | 0.08     | 1       | 1.08 | 0.39 | 0     | 1.59 | 0.42 | 0 |
|     | 0.12 n/a |         | 1.45 | 0.28 | 0     | 1.53 | 0.19 | 0 |
|     | 0.05     | 1       | 1.38 | 0.49 | 0     | 1.82 | 0.68 | 0 |
|     | 0.08     | 1 b2793 | 1.01 | 0.46 | 0     | 1.06 | 0.23 | 1 |
|     | 0.11     | 1       | 1.44 | 0.39 | 0     | 1.54 | 0.62 | 0 |
|     | 0.16 n/a |         | 1.86 | 0.7  | 0     | 1.96 | 0.67 | 0 |
|     | 0.16     | 1       | 2.25 | 1.07 | 0     | 1.58 | 0.57 | 0 |
|     | 0.08     | 1 b2990 | 2.1  | 0.69 | 0     | 1.52 | 0.69 | 0 |
|     | 0.07     | 1       | 1.27 | 0.31 | 0     | 1.44 | 0.63 | 0 |
|     | 0.05 n/a | b1530   | 0.82 | 0.22 | 0     | 0.82 | 0.41 | 1 |
|     | 0.12     | 1 b3676 | 1.97 | 0.52 | 0     | 1.91 | 0.64 | 0 |
|     | 0.12     | 1 b3652 | 0.67 | 0.62 | 1     | 0.89 | 0.95 | 1 |
|     | 0.16     | 1 b3537 | 1.46 | 0.7  | 0     | 1.56 | 0.78 | 0 |
|     | 0.13     | 1 b3670 | 1.51 | 0.81 | 0     | 1.67 | 0.94 | 0 |
| n/a | n/a      |         | n/a  | n/a  | 0 n/a | n/a  |      | 0 |
|     | 0.05     | 0 b1686 | 1.38 | 0.67 | 0     | 2.06 | 0.67 | 0 |
| n/a | n/a      |         | n/a  | n/a  | 0 n/a | n/a  |      | 0 |
| n/a | n/a      |         | n/a  | n/a  | 0 n/a | n/a  |      | 0 |
| n/a | n/a      |         | n/a  | n/a  | 0 n/a | n/a  |      | 0 |
| n/a | n/a      |         | n/a  | n/a  | 0 n/a | n/a  |      | 0 |
| n/a | n/a      |         | n/a  | n/a  | 0 n/a | n/a  |      | 0 |
|     | 0.26     | 0       | 1.32 | 0.37 | 0     | 2.09 | 0.86 | 0 |
| n/a | n/a      |         | n/a  | n/a  | 0 n/a | n/a  |      | 0 |
|     | 0.11     | 1 b3190 | 0.93 | 0.27 | 0     | 0.85 | 2.83 | 1 |
|     | 0.08 n/a |         | 1.59 | 0.4  | 0     | 1.7  | 0.89 | 0 |
| n/a | n/a      |         | n/a  | n/a  | 0 n/a | n/a  |      | 0 |
| n/a | n/a      |         | n/a  | n/a  | 0 n/a | n/a  |      | 0 |
| n/a | n/a      |         | n/a  | n/a  | 0 n/a | n/a  |      | 0 |
| n/a | n/a      |         | n/a  | n/a  | 0 n/a | n/a  |      | 0 |

|     |      |     |       |      |      |     |      |      |   |
|-----|------|-----|-------|------|------|-----|------|------|---|
| n/a | n/a  |     | n/a   | n/a  | 0    | n/a | n/a  | 0    |   |
| n/a | n/a  |     | n/a   | n/a  | 0    | n/a | n/a  | 0    |   |
| n/a | n/a  |     | n/a   | n/a  | 0    | n/a | n/a  | 0    |   |
| n/a | n/a  |     | n/a   | n/a  | 0    | n/a | n/a  | 0    |   |
| n/a | n/a  |     | n/a   | n/a  | 0    | n/a | n/a  | 0    |   |
|     | 0.06 | n/a |       | 1.6  | 0.34 | 1   | 0.29 | 0.22 | 1 |
|     | 0.09 | n/a | b2306 | 0.94 | 0.1  | 0   | 1.24 | 2.9  | 0 |
|     | 0.09 | n/a | b2310 | 0.71 | 0.23 | 0   | 1.31 | 0.1  | 1 |
|     | 0.08 | n/a | b2464 | 0.81 | 0.35 | 0   | 1.65 | 0.83 | 0 |
|     | 0.06 | 1   | b2468 | 1.27 | 0.47 | 0   | 2.02 | 0.71 | 0 |
| n/a | n/a  |     | n/a   | n/a  | 0    | n/a | n/a  | 0    |   |
|     | 0.08 | 1   |       | 1.26 | 0.38 | 0   | 1.26 | 0.14 | 1 |
|     | 0.12 | 1   |       | 1.53 | 0.39 | 0   | 1.5  | 0.79 | 0 |
|     | 0.18 | n/a | b0528 | 1.06 | 0.25 | 0   | 1.26 | 0.73 | 0 |
|     | 0.06 | 1   |       | 0.7  | 0.26 | 1   | 0.51 | 0.16 | 1 |
|     | 0.09 | 1   |       | 1.3  | 0.59 | 0   | 1.5  | 0.32 | 0 |
|     | 0.09 | 1   |       | 1.36 | 0.19 | 0   | 1.49 | 1.5  | 0 |
|     | 0.12 | 1   | b0374 | 1.68 | 0.23 | 0   | 1.27 | 0.35 | 0 |
|     | 0.06 | 1   |       | 1.45 | 0.39 | 0   | 1.88 | 0.58 | 0 |
|     | 0.06 | 1   |       | 1.44 | 0.61 | 0   | 1.11 | 0.44 | 1 |
|     | 0.1  | 1   |       | 0.38 | 0.09 | 1   | 0.25 | 0.14 | 1 |
|     | 0.08 | 1   |       | 1.74 | 0.55 | 0   | 1.39 | 0.39 | 0 |
|     | 0.1  | 1   |       | 1.52 | 0.74 | 0   | 1.49 | 0.4  | 0 |
|     | 0.08 | 1   |       | 1.51 | 0.26 | 0   | 1.37 | 0.79 | 1 |
|     | 0.09 | 1   |       | 1.24 | 0.65 | 0   | 1.38 | 0.44 | 1 |
|     | 0.07 | 1   |       | 1.44 | 0.41 | 0   | 1.7  | 0.76 | 0 |
|     | 0.08 | 1   |       | 1.72 | 0.5  | 0   | 1.43 | 0.44 | 0 |
|     | 0.06 | 1   |       | 1.16 | 0.22 | 0   | 1.67 | 0.61 | 0 |
|     | 0.12 | 1   |       | 1.01 | 0.13 | 0   | 1.04 | 0.08 | 1 |
|     | 0.07 | n/a |       | 1.49 | 0.44 | 0   | 1.48 | 0.49 | 0 |
|     | 0.07 | 1   |       | 1.3  | 0.49 | 0   | 1.72 | 0.47 | 0 |
|     | 0.09 | 1   |       | 1.21 | 0.14 | 1   | 0.73 | 0.35 | 1 |
|     | 0.05 | 1   |       | 1.51 | 0.27 | 0   | 1.64 | 1.32 | 0 |
|     | 0.08 | n/a |       | 0.9  | 0.39 | 0   | 1.16 | 0.5  | 1 |
|     | 0.08 | 1   |       | 1.14 | 0.72 | 0   | 1.3  | 0.36 | 0 |
|     | 0.69 | 1   |       | 1.83 | 0.45 | 0   | 1.37 | 2.86 | 0 |
|     | 0.09 | n/a | b4016 | 0.38 | 0.06 | 1   | 0.34 | 0.1  | 1 |
|     | 0.05 | 1   |       | 1.3  | 0.59 | 0   | 1.49 | 0.28 | 0 |
|     | 0.1  | 1   |       | 2.26 | 0.63 | 0   | 1.93 | 0.45 | 0 |
|     | 0.13 | 1   |       | 1.53 | 0.35 | 0   | 2.04 | 0.71 | 0 |
|     | 0.08 | n/a | b4330 | 0.98 | 0.29 | 0   | 1.38 | 0.3  | 0 |
|     | 0.14 | 1   |       | 1.43 | 0.4  | 0   | 1.53 | 0.74 | 0 |
|     | 0.09 | 1   |       | 1.24 | 0.33 | 0   | 1.69 | 0.75 | 0 |
|     | 0.05 | 1   |       | 1.17 | 0.2  | 0   | 1.18 | 0.41 | 1 |
|     | 0.15 | n/a |       | 1.34 | 0.52 | 0   | 2.08 | 0.54 | 0 |
|     | 0.11 | 1   |       | 1.24 | 0.29 | 0   | 1.69 | 0.67 | 0 |
|     | 0.13 | 1   |       | 1.15 | 0.18 | 1   | 1.26 | 0.66 | 1 |
|     | 0.13 | 1   |       | 1.58 | 1.1  | 0   | 1.4  | 1.17 | 1 |
|     | 0.07 | 1   | b3706 | 0.66 | 0.57 | 0   | 1.05 | 0.64 | 1 |
|     | 0.15 | 1   | b3738 | 0.22 | 0.07 | 1   | 0.17 | 0.14 | 1 |
|     | 0.13 | 1   |       | 1.44 | 0.25 | 1   | 1.17 | 0.19 | 1 |
|     | 0.08 | 1   | b3195 | 0.86 | 0.2  | 0   | 1.43 | 0.57 | 1 |

|     |          |         |     |      |      |     |      |      |   |
|-----|----------|---------|-----|------|------|-----|------|------|---|
| n/a | n/a      |         | n/a | n/a  | 0    | n/a | n/a  | 0    |   |
|     | 0.05     | 1 b3229 |     | 0.85 | 0.19 | 1   | 0.88 | 0.49 | 1 |
|     | 0.09     | 1 b3251 |     | 0.5  | 0.33 | 1   | 1.09 | 0.54 | 0 |
|     | 0.09     | 1       |     | 0.4  | 0.3  | 1   | 0.78 | 0.38 | 1 |
| n/a | n/a      |         | n/a | n/a  | 0    | n/a | n/a  | 0    |   |
|     | 0.08     | 1 b0683 |     | 1.66 | 0.49 | 1   | 1.53 | 0.69 | 1 |
|     | 0.1      | 1 b0995 |     | 1.24 | 0.88 | 0   | 1.78 | 0.69 | 0 |
|     | 0.06     | 1       |     | 1.17 | 0.48 | 0   | 2.18 | 0.47 | 0 |
| n/a | n/a      |         | n/a | n/a  | 0    | n/a | n/a  | 0    |   |
|     | 0.09     | 1 b3711 |     | 1.54 | 0.33 | 0   | 1.57 | 0.3  | 0 |
|     | 0.09     | 1 b3747 |     | 0.91 | 0.19 | 0   | 1.58 | 0.72 | 0 |
|     | 0.09     | 1       |     | 1.26 | 0.36 | 0   | 1.12 | 0.67 | 0 |
|     | 0.06     | 1 b0759 |     | 1.89 | 0.62 | 1   | 2.12 | 0.96 | 1 |
|     | 0.09     | 1       |     | 0.88 | 0.57 | 0   | 1.79 | 0.57 | 0 |
|     | 0.09     | 1       |     | 1.17 | 0.18 | 1   | 0.97 | 0.43 | 1 |
|     | 0.11 n/a |         |     | 1.4  | 0.28 | 0   | 1.8  | 0.63 | 0 |
|     | 0.07     | 1 b0101 |     | 1.77 | 0.48 | 0   | 1.46 | 0.2  | 0 |
|     | 0.06     | 1 b0126 |     | 1.56 | 0.65 | 0   | 2.06 | 0.62 | 0 |
|     | 0.04     | 1 b0163 |     | 1.06 | 0.25 | 1   | 0.95 | 0.38 | 1 |
|     | 0.07     | 1 b3285 |     | 1.47 | 0.32 | 1   | 1.66 | 0.98 | 0 |
|     | 0.18     | 1       |     | 1.51 | 0.53 | 0   | 1.8  | 0.79 | 0 |
|     | 0.04     | 1 b1109 |     | 1.42 | 0.39 | 0   | 1.63 | 0.39 | 0 |
|     | 0.07     | 1       |     | 1.07 | 1.26 | 0   | 1.97 | 0.44 | 0 |
|     | 0.03     | 1 b1782 |     | 0.67 | 0.3  | 1   | 1.4  | 0.68 | 0 |
|     | 0.04     | 1 b2060 |     | 1.54 | 0.52 | 0   | 1.76 | 0.57 | 0 |
|     | 0.12     | 0 b1112 |     | 1.46 | 0.33 | 0   | 2.31 | 0.87 | 0 |
|     | 0.15     | 0       |     | 1.59 | 0.78 | 0   | 1.9  | 0.62 | 0 |
|     | 0.05     | 1 b1781 |     | 0.95 | 0.27 | 0   | 1.32 | 0.81 | 1 |
|     | 0.02     | 1 b2063 |     | 0.86 | 0.55 | 0   | 1.7  | 0.3  | 0 |
|     | 0.11     | 1 b4403 |     | 1.09 | 0.42 | 0   | 1.86 | 0.62 | 1 |
| n/a | n/a      |         | n/a | n/a  | 0    | n/a | n/a  | 0    |   |
|     | 0.04     | 1 b2053 |     | 1.51 | 0.17 | 0   | 1.72 | 0.51 | 0 |
|     | 0.06     | 1 b2081 |     | 0.53 | 1.49 | 0   | 1.24 | 0.74 | 1 |
| n/a | n/a      |         | n/a | n/a  | 0    | n/a | n/a  | 0    |   |
|     | 0.12 n/a |         |     | 1.44 | 0.49 | 0   | 2.02 | 0.95 | 0 |
| n/a | n/a      |         | n/a | n/a  | 0    | n/a | n/a  | 0    |   |
|     | 0.06     | 1 b0948 |     | 0.37 | 0.48 | 1   | 0.66 | 0.56 | 1 |
|     | 0.06     | 1 b3962 |     | 0.5  | 0.1  | 1   | 0.57 | 0.2  | 1 |
|     | 0.12     | 1 b2739 |     | 1.22 | 0.55 | 0   | 2.05 | 0.75 | 0 |
|     | 0.12     | 1 b2331 |     | 1.09 | 0.55 | 0   | 1.63 | 0.53 | 0 |
|     | 0.03     | 1 b2409 |     | 1.82 | 0.75 | 0   | 1.37 | 0.48 | 0 |
| n/a | n/a      |         | n/a | n/a  | 0    | n/a | n/a  | 0    |   |
|     | 0.14     | 0 b2518 |     | 0.45 | 0.47 | 1   | 0.74 | 0.31 | 1 |
| n/a | n/a      |         | n/a | n/a  | 0    | n/a | n/a  | 0    |   |
|     | 0.11     | 1 b2507 |     | 0.31 | 0.4  | 1   | 0.85 | 0.69 | 1 |
|     | 0.07     | 1 b2531 |     | 1.94 | 0.17 | 1   | 1.33 | 1.19 | 1 |
| n/a | n/a      |         | n/a | n/a  | 0    | n/a | n/a  | 0    |   |
|     | 0.22     | 1       |     | 0.62 | 1.03 | 0   | 1.55 | 0.82 | 0 |
| n/a | n/a      |         | n/a | n/a  | 0    | n/a | n/a  | 0    |   |
|     | 0.1      | 1       |     | 1.31 | 0.22 | 0   | 1.76 | 0.71 | 0 |
| n/a | n/a      |         | n/a | n/a  | 0    | n/a | n/a  | 0    |   |
|     | 0.07     | 1       |     | 1.54 | 0.38 | 0   | 1.8  | 0.44 | 0 |

|      |      |         |       |      |       |      |      |   |
|------|------|---------|-------|------|-------|------|------|---|
| 0.12 |      | 1 b2475 | 1.29  | 0.34 | 0     | 1.36 | 0.34 | 0 |
| 0.06 |      | 1       | 1.54  | 0.33 | 0     | 1.9  | 0.76 | 0 |
| 0.04 |      | 1       | 1.53  | 0.61 | 0     | 2.16 | 0.75 | 0 |
| 0.06 |      | 1 b0921 | 0.74  | 0.2  | 0     | 1.35 | 0.42 | 0 |
| 0.09 |      | 1 b1919 | 1.12  | 0.85 | 1     | 1.72 | 0.73 | 1 |
| 0.06 |      | 1 b2023 | 1.34  | 0.47 | 0     | 1.68 | 0.84 | 0 |
| 0.03 |      | 1 b2292 | 1.56  | 0.26 | 0     | 1.47 | 0.36 | 0 |
| 0.04 |      | 1       | 1.67  | 0.57 | 0     | 2.05 | 0.66 | 0 |
| 0.07 |      | 1 b1798 | 0.71  | 0.36 | 0     | 1.09 | 1.33 | 0 |
| 0.06 |      | 1       | 1.21  | 1.31 | 1     | 1.72 | 0.66 | 0 |
| 0.1  |      | 1 b1722 | 1.2   | 0.24 | 0     | 1.97 | 0.44 | 0 |
| 0.07 |      | 1 b0335 | 1.59  | 0.78 | 0     | 2.04 | 0.86 | 0 |
| 0.08 |      | 1 b1732 | 1.26  | 0.45 | 0     | 1.93 | 0.51 | 0 |
| 0.1  |      | 1 b4166 | 1.66  | 0.43 | 0     | 1.6  | 0.53 | 0 |
| 0.06 | n/a  |         | 1.17  | 0.41 | 1     | 1.03 | 0.98 | 1 |
| 0.06 |      | 1       | 1.45  | 0.22 | 0     | 2.33 | 0.66 | 0 |
| 0.16 |      | 1 b4188 | 3.08  | 0.56 | 1     | 1.5  | 0.6  | 0 |
| n/a  | n/a  |         | n/a   | n/a  | 0 n/a | n/a  | n/a  | 0 |
|      | 0.1  | 1 b2232 | 0.85  | 0.6  | 0     | 1.27 | 0.58 | 1 |
| n/a  | n/a  |         | n/a   | n/a  | 0 n/a | n/a  | n/a  | 0 |
|      | 0.05 | 1       | 1.43  | 0.38 | 0     | 1.76 | 0.6  | 0 |
|      | 0.06 | 1 b2254 | 0.18  | 0.38 | 1     | 0.26 | 0.97 | 1 |
|      | 0.09 | 1 b2291 | 1.18  | 0.23 | 0     | 1.69 | 0.42 | 0 |
| n/a  | n/a  |         | n/a   | n/a  | 0 n/a | n/a  | n/a  | 0 |
|      | 0.08 | 1       | 1.06  | 0.32 | 0     | 1.58 | 0.43 | 0 |
| n/a  | n/a  |         | n/a   | n/a  | 0 n/a | n/a  | n/a  | 0 |
|      | 0.06 | 1 b0331 | 1.47  | 0.37 | 0     | 1.68 | 0.37 | 0 |
|      | 0.43 | 1 b2582 | 11.61 | 5.18 | 1     | 7.64 | 2.63 | 1 |
|      | 0.11 | 1 b0390 | 1.24  | 0.59 | 0     | 2.04 | 0.64 | 0 |
|      | 0.14 | 1       | 1.61  | 0.31 | 0     | 1.98 | 0.35 | 0 |
|      | 0.14 | 1 b2300 | 0.75  | 0.26 | 0     | 1.63 | 0.66 | 0 |
|      | 0.09 | 1 b2253 | 0.18  | 0.46 | 1     | 0.5  | 0.74 | 1 |
|      | 0.18 | 1 b4030 | 1.28  | 0.31 | 0     | 1.53 | 0.31 | 0 |
|      | 0.04 | 1 b1678 | 1.51  | 0.18 | 0     | 2.35 | 0.4  | 1 |
|      | 0.05 | 1       | 1.13  | 0.14 | 0     | 1.93 | 0.68 | 0 |
|      | 0.12 | 1 b2213 | 1.15  | 0.81 | 0     | 1.34 | 0.69 | 0 |
|      | 0.13 | 1       | 1.57  | 0.53 | 0     | 1.34 | 0.77 | 0 |
|      | 0.05 | 1 b2563 | 0.97  | 0.25 | 0     | 2.07 | 0.74 | 0 |
|      | 0.26 | 1 b0120 | 0.59  | 0.37 | 1     | 0.85 | 0.81 | 1 |
|      | 0.15 | 1 b2009 | 2.93  | 1.58 | 1     | 4.29 | 1.68 | 1 |
|      | 0.14 | 1 b0110 | 1.54  | 0.26 | 1     | 1.17 | 0.42 | 1 |
|      | 0.08 | 1       | 1.09  | 0.47 | 0     | 1.8  | 0.48 | 0 |
|      | 0.05 | 1 b1719 | 0.49  | 0.18 | 1     | 0.49 | 0.48 | 1 |
|      | 0.09 | 1 b0423 | 0.98  | 0.39 | 0     | 2.32 | 0.99 | 0 |
|      | 0.06 | 1 b1605 | 1.18  | 0.34 | 0     | 1.83 | 0.5  | 0 |
|      | 0.14 | 1 b0481 | 0.94  | 0.5  | 0     | 1.24 | 0.5  | 0 |
|      | 0.06 | 1 b0482 | 1.05  | 0.21 | 0     | 1.33 | 0.27 | 0 |
|      | 0.09 | 1 b0592 | 4.12  | 2.97 | 1     | 2.11 | 0.7  | 0 |
|      | 0.1  | 1 b4258 | 0.7   | 0.41 | 1     | 0.94 | 0.6  | 1 |
|      | 0.08 | 1 b4401 | 1.4   | 0.34 | 1     | 1.52 | 0.76 | 1 |
|      | 0.08 | 1       | 1.44  | 0.36 | 0     | 1.5  | 0.49 | 0 |
|      | 0.15 | 1 b3651 | 0.76  | 0.21 | 0     | 1.64 | 0.55 | 0 |

|     |          |         |     |      |      |       |      |      |   |
|-----|----------|---------|-----|------|------|-------|------|------|---|
|     | 0.04     | 1       |     | 1.53 | 0.46 | 0     | 1.78 | 0.75 | 0 |
|     | 0.1      | 1 b2406 |     | 1.19 | 0.41 | 0     | 1.5  | 0.37 | 0 |
|     | 0.07     | 1       |     | 8.07 | 5.33 | 1     | 2.49 | 1.05 | 1 |
| n/a | n/a      |         | n/a | n/a  |      | 0 n/a | n/a  |      | 0 |
|     | 0.09     | 0       |     | 1.71 | 0.39 | 0     | 2.45 | 1.06 | 0 |
| n/a | n/a      |         | n/a | n/a  |      | 0 n/a | n/a  |      | 0 |
|     | 0.05     | 1 b2575 |     | 1.24 | 0.26 | 0     | 1.49 | 0.69 | 0 |
|     | 0.09     | 1       |     | 1.15 | 0.36 | 0     | 1.87 | 0.76 | 0 |
|     | 0.11     | 1 b3487 |     | 1.49 | 0.56 | 0     | 1.98 | 0.55 | 0 |
|     | 0.14     | 1       |     | 1.38 | 0.21 | 0     | 1.86 | 0.75 | 0 |
|     | 0.06     | 1       |     | 0.97 | 0.67 | 0     | 2.55 | 1.82 | 0 |
|     | 0.11     | 1       |     | 0.76 | 0.43 | 1     | 1.34 | 0.42 | 0 |
|     | 0.09 n/a | b2457   |     | 1.37 | 0.39 | 0     | 1.72 | 0.54 | 0 |
|     | 0.19     | 1 b3910 |     | 1.15 | 0.35 | 0     | 1.67 | 0.94 | 0 |
|     | 0.09     | 1 b0651 |     | 0.89 | 0.59 | 0     | 1.82 | 0.47 | 0 |
|     | 0.15     | 0 b0699 |     | 1.74 | 0.63 | 0     | 1.38 | 0.8  | 0 |
|     | 0.18     | 1       |     | 1.69 | 0.43 | 0     | 1.31 | 0.47 | 0 |
|     | 0.08     | 1       |     | 1.42 | 0.48 | 0     | 1.86 | 0.58 | 0 |
|     | 0.04     | 1 b0766 |     | 1.37 | 0.38 | 0     | 1.51 | 0.52 | 0 |
|     | 0.1      | 1       |     | 1.82 | 0.19 | 0     | 1.75 | 0.92 | 0 |
|     | 0.07     | 1       |     | 0.99 | 0.2  | 1     | 0.33 | 0.12 | 1 |
|     | 0.08     | 1 b1076 |     | 0.91 | 0.42 | 0     | 1.07 | 0.76 | 1 |
|     | 0.07     | 1 b1211 |     | 0.61 | 0.47 | 0     | 0.94 | 0.62 | 1 |
|     | 0.04     | 1 b1896 |     | 1.4  | 0.17 | 0     | 2.12 | 0.88 | 0 |
|     | 0.14     | 0       |     | 1.76 | 0.32 | 0     | 1.79 | 0.79 | 0 |
|     | 0.1      | 1 b3736 |     | 0.24 | 0.04 | 1     | 0.13 | 0.1  | 1 |
|     | 0.09     | 1 b1651 |     | 0.8  | 0.25 | 1     | 0.76 | 0.49 | 1 |
|     | 0.11     | 1 b1918 |     | 1.24 | 0.56 | 1     | 1.43 | 0.51 | 0 |
|     | 0.06     | 1       |     | 1.17 | 0.25 | 1     | 1.41 | 0.41 | 0 |
|     | 0.06     | 1 b2571 |     | 1.82 | 0.5  | 1     | 1.98 | 2.96 | 1 |
|     | 0.05     | 1 b0720 |     | 1.14 | 0.26 | 1     | 0.85 | 5.04 | 1 |
|     | 0.09     | 1 b1129 |     | 0.69 | 0.09 | 1     | 0.74 | 2.23 | 1 |
|     | 0.11     | 1 b4005 |     | 0.98 | 0.39 | 0     | 1.42 | 0.42 | 0 |
|     | 0.08     | 1 b3168 |     | 1.05 | 0.16 | 1     | 0.51 | 0.62 | 1 |
|     | 0.08     | 1       |     | 1.78 | 0.33 | 0     | 1.58 | 0.45 | 0 |
|     | 0.05     | 1 b4239 |     | 0.84 | 0.09 | 1     | 0.61 | 0.24 | 1 |
|     | 0.11     | 1       |     | 1.61 | 0.24 | 0     | 1.77 | 0.49 | 0 |
|     | 0.05     | 1 b1092 |     | 0.61 | 0.09 | 1     | 0.43 | 0.31 | 1 |
|     | 0.06     | 0 b1283 |     | 1.15 | 0.24 | 0     | 2.18 | 1.14 | 0 |
|     | 0.11     | 1       |     | 1.34 | 0.25 | 0     | 1.78 | 0.9  | 0 |
|     | 0.11     | 1 b3630 |     | 1.48 | 0.47 | 1     | 1.6  | 0.7  | 0 |
| n/a | n/a      |         | n/a | n/a  |      | 0 n/a | n/a  |      | 0 |
|     | 0.05     | 1       |     | 1.24 | 0.43 | 0     | 2.22 | 1.33 | 0 |
|     | 0.09     | 1 b3844 |     | 0.45 | 0.36 | 1     | 0.6  | 2.31 | 1 |
|     | 0.07     | 1 b2606 |     | 0.56 | 0.2  | 1     | 0.5  | 0.49 | 1 |
|     | 0.09     | 1 b3791 |     | 1.1  | 0.41 | 1     | 1.39 | 0.35 | 0 |
|     | 0.12     | 1       |     | 1.26 | 0.22 | 0     | 1.62 | 0.55 | 0 |
|     | 0.09     | 1 b1080 |     | 0.82 | 0.38 | 0     | 1.25 | 0.44 | 0 |
|     | 0.15     | 1       |     | 1.41 | 0.49 | 0     | 1.56 | 0.24 | 0 |
|     | 0.16     | 1 b2828 |     | 0.72 | 0.42 | 1     | 0.97 | 0.41 | 1 |
|     | 0.06     | 1       |     | 0.5  | 0.38 | 1     | 0.49 | 0.62 | 1 |
|     | 0.1      | 1       |     | 1.41 | 0.37 | 0     | 1.62 | 0.56 | 0 |

|      |     |       |       |      |   |       |      |   |
|------|-----|-------|-------|------|---|-------|------|---|
| 0.14 | 1   | b3893 | 1.13  | 0.12 | 1 | 1.16  | 2.75 | 1 |
| 0.07 | 1   | b0809 | 0.66  | 0.13 | 1 | 0.59  | 0.47 | 1 |
| 0.04 | 1   | b3845 | 0.22  | 0.07 | 1 | 0.31  | 0.17 | 1 |
| 0.06 | 1   | b1880 | 1.2   | 0.35 | 0 | 1.94  | 1.41 | 0 |
| 0.07 | 1   | b0926 | 0.26  | 0.11 | 1 | 0.28  | 0.13 | 1 |
| 0.21 | 0   | b3583 | 1.48  | 0.55 | 0 | 2.51  | 1.2  | 0 |
| 0.06 | 1   | b0130 | 0.83  | 0.24 | 0 | 1.53  | 0.56 | 0 |
| 0.12 | 1   | b0605 | 12.82 | 4.74 | 1 | 15.27 | 5.05 | 1 |
| 0.1  | 1   | b2837 | 0.75  | 0.3  | 1 | 1.11  | 0.37 | 1 |
| 0.11 | 1   |       | 1.36  | 0.21 | 0 | 1.88  | 0.39 | 0 |
| 0.09 | 1   | b1859 | 1.2   | 0.19 | 0 | 1.98  | 0.33 | 0 |
| 0.03 | 1   |       | 1.57  | 0.45 | 0 | 1.79  | 0.56 | 0 |
| 0.06 | 1   | b1467 | 1.68  | 0.42 | 0 | 1.51  | 0.27 | 0 |
| 0.08 | 1   | b1465 | 1.4   | 0.48 | 0 | 1.53  | 2.48 | 0 |
| 0.11 | 1   |       | 1.2   | 1.06 | 0 | 1.77  | 0.37 | 1 |
| 0.08 | 1   |       | 0.66  | 0.3  | 1 | 1.21  | 0.35 | 1 |
| 0.07 | 1   | b1192 | 1.07  | 0.41 | 0 | 1.72  | 0.42 | 0 |
| 0.11 | 1   | b1832 | 0.35  | 0.32 | 1 | 0.82  | 0.49 | 1 |
| 0.05 | 1   | b1857 | 0.27  | 0.12 | 1 | 0.48  | 0.39 | 1 |
| 0.1  | 1   | b1330 | 1     | 0.17 | 0 | 1.45  | 0.34 | 0 |
| 0.05 | n/a |       | 1.24  | 0.38 | 0 | 1.5   | 0.5  | 0 |
| 0.06 | 1   |       | 1.2   | 0.3  | 1 | 1.22  | 1.05 | 1 |
| n/a  | n/a |       | n/a   | n/a  | 0 | n/a   | n/a  | 0 |
| 0.08 | 1   | b0589 | 3.73  | 1.28 | 1 | 1.62  | 1.46 | 0 |
| 0.06 | 1   |       | 1.49  | 0.79 | 0 | 1.94  | 1.23 | 0 |
| 0.04 | 1   |       | 1.24  | 0.63 | 0 | 1.83  | 0.76 | 0 |
| n/a  | n/a |       | n/a   | n/a  | 0 | n/a   | n/a  | 0 |
| 0.08 | 1   |       | 1.2   | 0.08 | 0 | 1.92  | 0.45 | 0 |
| n/a  | n/a |       | n/a   | n/a  | 0 | n/a   | n/a  | 0 |
| 0.04 | 1   | b1852 | 1.45  | 0.2  | 1 | 0.93  | 0.71 | 1 |
| n/a  | n/a |       | n/a   | n/a  | 0 | n/a   | n/a  | 0 |
| n/a  | n/a |       | n/a   | n/a  | 0 | n/a   | n/a  | 0 |
| 0.11 | 1   |       | 1.21  | 0.37 | 0 | 1.97  | 0.95 | 1 |
| 0.07 | 1   | b2926 | 0.96  | 0.17 | 1 | 0.58  | 3.25 | 1 |
| 0.13 | 1   |       | 1.15  | 0.46 | 0 | 1.45  | 0.35 | 0 |
| 0.1  | 1   |       | 1.45  | 0.28 | 0 | 1.84  | 0.52 | 0 |
| 0.09 | 1   | b2702 | 2.91  | 1    | 1 | 3.05  | 0.93 | 1 |
| 0.06 | n/a |       | 1.17  | 0.37 | 0 | 1.8   | 0.35 | 0 |
| 0.12 | 0   |       | 1.24  | 0.39 | 0 | 2     | 1.2  | 0 |
| 0.24 | 1   | b2804 | 1.5   | 0.19 | 0 | 1.71  | 0.99 | 0 |
| n/a  | n/a |       | n/a   | n/a  | 0 | n/a   | n/a  | 0 |
| 0.04 | 1   | b0386 | 1.6   | 0.25 | 1 | 1.42  | 0.75 | 1 |
| 0.07 | 1   |       | 1     | 0.16 | 1 | 0.56  | 0.22 | 1 |
| 0.08 | 1   | b2830 | 0.74  | 0.15 | 1 | 0.86  | 0.2  | 1 |
| 0.07 | 1   |       | 1.6   | 0.33 | 0 | 1.99  | 0.44 | 0 |
| 0.06 | 1   | b1582 | 1.09  | 0.47 | 0 | 1.47  | 0.73 | 0 |
| 0.06 | 1   | b3773 | 1.26  | 0.29 | 0 | 1.48  | 0.42 | 0 |
| 0.06 | 1   | b2708 | 1.25  | 0.04 | 1 | 1.61  | 0.49 | 0 |
| n/a  | n/a |       | n/a   | n/a  | 0 | n/a   | n/a  | 0 |
| 0.05 | n/a |       | 1.54  | 0.26 | 0 | 1.81  | 0.64 | 0 |
| 0.1  | 1   | b2698 | 1.35  | 1.2  | 0 | 2.24  | 0.56 | 1 |
| 0.04 | 1   | b2151 | 0.94  | 0.35 | 0 | 1.59  | 0.44 | 0 |

|      |     |         |      |      |   |      |      |   |
|------|-----|---------|------|------|---|------|------|---|
| 0.09 |     | 1 b2186 | 0.46 | 0.46 | 1 | 0.87 | 0.34 | 1 |
| 0.05 |     | 1 b2086 | 1.51 | 0.48 | 0 | 2.05 | 0.24 | 0 |
| 0.09 |     | 1 b2138 | 1.37 | 0.53 | 0 | 1.66 | 0.62 | 0 |
| 0.1  |     | 1 b2167 | 1.37 | 0.27 | 0 | 1.86 | 0.32 | 0 |
| 0.06 |     | 1 b2098 | 1.13 | 0.26 | 0 | 1.81 | 0.48 | 0 |
| 0.11 |     | 1       | 1.37 | 0.65 | 0 | 1.25 | 1.17 | 0 |
| 0.14 |     | 1 b3577 | 1.41 | 0.67 | 0 | 2.71 | 0.83 | 0 |
| 0.06 |     | 1 b0866 | 1.08 | 0.27 | 0 | 1.39 | 0.54 | 0 |
| 0.07 |     | 1 b4180 | 1.5  | 0.29 | 1 | 1.48 | 0.56 | 0 |
| 0.18 |     | 1 b3345 | 0.47 | 0.24 | 1 | 1.57 | 0.42 | 0 |
| 0.06 |     | 1 b4173 | 0.57 | 0.12 | 1 | 0.58 | 0.14 | 1 |
| 0.13 |     | 1 b3161 | 0.83 | 0.29 | 0 | 1.18 | 1.39 | 0 |
| 0.14 |     | 1 b4393 | 0.92 | 0.46 | 0 | 2.12 | 0.84 | 0 |
| 0.1  |     | 1 b2690 | 0.9  | 0.22 | 1 | 1.37 | 0.71 | 0 |
| 0.05 |     | 1 b2174 | 0.25 | 0.32 | 1 | 0.72 | 0.22 | 1 |
| 0.06 |     | 1 b2963 | 0.7  | 0.27 | 1 | 1.02 | 0.37 | 1 |
| 0.12 | n/a | b2912   | 1.34 | 0.23 | 1 | 1.57 | 0.37 | 1 |
| 0.05 |     | 1 b0750 | 0.74 | 0.29 | 0 | 1.32 | 0.52 | 1 |
| 0.03 |     | 1       | 2.44 | 0.87 | 0 | 1.88 | 0.28 | 0 |
| 0.05 |     | 1 b2892 | 0.63 | 0.24 | 1 | 0.99 | 0.83 | 1 |
| 0.17 |     | 1 b3150 | 0.68 | 0.12 | 1 | 0.94 | 0.5  | 1 |
| 0.07 |     | 1 b0785 | 2.03 | 0.44 | 0 | 1.57 | 0.4  | 0 |
| 0.04 |     | 1 b0835 | 0.35 | 0.16 | 1 | 0.49 | 0.24 | 1 |
| 0.04 |     | 1       | 1.63 | 0.37 | 0 | 1.63 | 5.6  | 0 |
| 0.24 |     | 1 b3100 | 0.77 | 0.36 | 0 | 1.35 | 0.75 | 0 |
| 0.1  | n/a |         | 1.75 | 0.3  | 1 | 0.91 | 0.44 | 1 |
| 0.11 |     | 1       | 0.98 | 0.25 | 0 | 1.94 | 0.68 | 0 |
| 0.02 |     | 1 b0823 | 1.84 | 0.4  | 1 | 1.67 | 0.41 | 0 |
| 0.08 |     | 1 b0379 | 1.01 | 0.26 | 0 | 1.91 | 0.51 | 0 |
| 0.11 |     | 1 b0435 | 0.55 | 0.2  | 1 | 0.7  | 0.35 | 1 |
| n/a  | n/a |         | n/a  | n/a  | 0 | n/a  | n/a  | 0 |
| n/a  | n/a |         | n/a  | n/a  | 0 | n/a  | n/a  | 0 |
| n/a  | n/a |         | n/a  | n/a  | 0 | n/a  | n/a  | 0 |
| 0.06 | n/a |         | 1.32 | 0.39 | 0 | 1.95 | 0.73 | 0 |
| n/a  | n/a |         | n/a  | n/a  | 0 | n/a  | n/a  | 0 |
| 0.12 |     | 1       | 0.74 | 0.12 | 1 | 1.25 | 0.28 | 1 |
| 0.31 |     | 0 b4151 | 1.98 | 0.65 | 1 | 1.42 | 0.42 | 0 |
| 0.06 |     | 1       | 1.22 | 0.19 | 0 | 1.87 | 0.4  | 0 |
| 0.06 |     | 1 b1208 | 0.31 | 0.04 | 1 | 0.32 | 0.74 | 1 |
| 0.12 |     | 1       | 1.3  | 0.34 | 0 | 1.83 | 1.1  | 0 |
| 0.09 |     | 1 b2051 | 1.72 | 0.39 | 0 | 1.87 | 0.59 | 0 |
| 0.1  |     | 1       | 1.45 | 0.23 | 0 | 2.03 | 0.45 | 0 |
| 0.07 |     | 1 b3185 | 0.21 | 0.03 | 1 | 0.37 | 0.14 | 1 |
| 0.17 |     | 1 b2962 | 0.72 | 0.11 | 1 | 0.46 | 0.13 | 1 |
| 0.03 |     | 1       | 0.86 | 0.22 | 0 | 1.39 | 0.6  | 0 |
| 0.06 |     | 1 b1854 | 1.49 | 0.28 | 1 | 0.73 | 0.4  | 1 |
| 0.07 |     | 1 b1383 | 1.41 | 0.18 | 0 | 1.2  | 1.5  | 0 |
| 0.06 |     | 1 b3238 | 1.35 | 0.33 | 0 | 2.2  | 1.54 | 0 |
| 0.07 |     | 1 b2007 | 0.76 | 0.1  | 1 | 1.3  | 0.94 | 1 |
| 0.09 |     | 1       | 1.52 | 0.45 | 0 | 1.72 | 0.61 | 0 |
| 0.12 |     | 1       | 1.14 | 0.21 | 0 | 1.67 | 0.71 | 0 |
| n/a  | n/a |         | n/a  | n/a  | 0 | n/a  | n/a  | 0 |



|     |      |     |       |      |      |   |      |      |   |
|-----|------|-----|-------|------|------|---|------|------|---|
|     | 0.09 | 1   |       | 1.69 | 0.32 | 0 | 1.7  | 0.48 | 0 |
|     | 0.19 | 1   |       | 1.28 | 0.26 | 0 | 1.86 | 0.92 | 0 |
|     | 0.12 | 1   | b2325 | 0.73 | 0.27 | 0 | 1.41 | 0.44 | 0 |
|     | 0.1  | 1   | b2377 | 1.53 | 0.26 | 0 | 1.6  | 0.56 | 0 |
|     | 0.1  | 1   |       | 0.92 | 0.21 | 0 | 1.43 | 0.31 | 0 |
|     | 0.09 | 1   | b0630 | 0.68 | 0.16 | 1 | 1.16 | 1.75 | 1 |
|     | 0.12 | 1   | b0682 | 2.01 | 0.55 | 0 | 1.56 | 0.86 | 0 |
|     | 0.09 | 1   | b2315 | 0.42 | 0.18 | 1 | 0.77 | 0.22 | 1 |
| n/a | n/a  |     |       | n/a  | n/a  | 0 | n/a  | n/a  | 0 |
| n/a | n/a  |     |       | n/a  | n/a  | 0 | n/a  | n/a  | 0 |
| n/a | n/a  |     |       | n/a  | n/a  | 0 | n/a  | n/a  | 0 |
| n/a | n/a  |     |       | n/a  | n/a  | 0 | n/a  | n/a  | 0 |
| n/a | n/a  |     |       | n/a  | n/a  | 0 | n/a  | n/a  | 0 |
| n/a | n/a  |     |       | n/a  | n/a  | 0 | n/a  | n/a  | 0 |
| n/a | n/a  |     |       | n/a  | n/a  | 0 | n/a  | n/a  | 0 |
| n/a | n/a  |     |       | n/a  | n/a  | 0 | n/a  | n/a  | 0 |
| n/a | n/a  |     |       | n/a  | n/a  | 0 | n/a  | n/a  | 0 |
|     | 0.13 | 1   |       | 0.83 | 0.05 | 1 | 0.89 | 0.65 | 1 |
|     | 0.11 | n/a |       | 1.27 | 0.13 | 0 | 1.64 | 0.48 | 0 |
| n/a | n/a  |     |       | n/a  | n/a  | 0 | n/a  | n/a  | 0 |
|     | 0.11 | 0   |       | 1.46 | 0.36 | 0 | 1.94 | 4.69 | 0 |
|     | 0.06 | n/a | b0584 | 2.51 | 0.49 | 1 | 1.92 | 0.29 | 0 |
|     | 0.07 | n/a |       | 1.1  | 0.23 | 0 | 2.3  | 0.72 | 0 |
|     | 0.09 | 1   |       | 1    | 0.23 | 0 | 0.99 | 0.18 | 1 |
|     | 0.04 | 1   |       | 1.27 | 0.3  | 0 | 1.17 | 0.67 | 0 |
|     | 0.05 | 1   |       | 1.26 | 0.18 | 0 | 1.48 | 0.23 | 0 |
|     | 0.05 | n/a |       | 1.12 | 0.26 | 0 | 1.35 | 0.21 | 1 |
|     | 0.05 | 1   |       | 0.96 | 0.35 | 0 | 1.4  | 0.38 | 1 |
|     | 0.07 | 1   |       | 1.15 | 0.58 | 0 | 2.12 | 0.92 | 0 |
|     | 0.05 | 1   |       | 1.09 | 0.22 | 0 | 1.74 | 0.63 | 0 |
|     | 0.07 | 1   |       | 1.08 | 0.3  | 0 | 1.45 | 0.75 | 0 |
|     | 0.08 | 1   |       | 0.98 | 0.23 | 0 | 1.6  | 0.53 | 0 |
|     | 0.1  | n/a |       | 1.04 | 0.32 | 0 | 2.54 | 3.69 | 0 |
|     | 0.12 | 1   |       | 1.25 | 0.43 | 0 | 2.74 | 1.01 | 0 |
|     | 0.04 | 1   |       | 2.18 | 2.25 | 0 | 2.35 | 0.97 | 0 |
|     | 0.05 | 1   |       | 1.67 | 0.51 | 0 | 1.96 | 0.58 | 0 |
|     | 0.04 | 1   | b1629 | 0.6  | 0.17 | 1 | 0.96 | 0.35 | 1 |
|     | 0.08 | n/a |       | 1    | 0.16 | 0 | 1.6  | 0.67 | 0 |
|     | 0.08 | n/a |       | 1.13 | 0.49 | 0 | 1.96 | 0.69 | 0 |
|     | 0.04 | n/a |       | 1.85 | 0.61 | 0 | 1.88 | 0.62 | 0 |
|     | 0.08 | 1   |       | 1.46 | 0.39 | 0 | 1.9  | 0.77 | 0 |
|     | 0.08 | 1   |       | 1.35 | 0.28 | 0 | 1.52 | 0.39 | 0 |
|     | 0.07 | 1   |       | 1.13 | 0.32 | 0 | 1.58 | 0.54 | 0 |
|     | 0.11 | 1   |       | 1.15 | 0.29 | 0 | 1.45 | 0.38 | 0 |
|     | 0.22 | 0   |       | 1.4  | 0.28 | 0 | 1.58 | 1.2  | 0 |
|     | 0.04 | 1   |       | 1.29 | 0.38 | 0 | 1.86 | 0.68 | 0 |
|     | 0.21 | 0   |       | 1.22 | 0.5  | 0 | 1.75 | 3.22 | 0 |
|     | 0.09 | 1   |       | 1.19 | 0.39 | 0 | 1.33 | 0.16 | 0 |
|     | 0.1  | n/a |       | 1.18 | 0.32 | 0 | 1.48 | 0.22 | 0 |
|     | 0.1  | 1   |       | 1.16 | 0.28 | 0 | 1.51 | 0.64 | 0 |
|     | 0.16 | 1   |       | 1.59 | 0.63 | 0 | 2.09 | 0.8  | 0 |
|     | 0.06 | 1   |       | 1.3  | 0.21 | 1 | 0.79 | 1.54 | 1 |

|     |         |         |     |      |      |       |      |      |   |
|-----|---------|---------|-----|------|------|-------|------|------|---|
|     | 0.13    | 1       |     | 1.18 | 0.61 | 0     | 1.73 | 0.47 | 0 |
|     | 0.17    | 1       |     | 1.49 | 0.3  | 0     | 2.18 | 0.94 | 0 |
|     | 0.06    | 1       |     | 1.64 | 0.45 | 1     | 1.67 | 0.48 | 1 |
|     | 0.06    | 1 b4074 |     | 1.4  | 0.54 | 0     | 1.65 | 0.54 | 0 |
|     | 0.08    | 1       |     | 1.3  | 0.3  | 0     | 1.37 | 0.6  | 1 |
|     | 0.06    | 1       |     | 1.01 | 0.23 | 1     | 1.26 | 0.47 | 1 |
|     | 0.11    | 1       |     | 1.14 | 0.51 | 0     | 1.75 | 1.02 | 0 |
|     | 0.12    | 1 b0127 |     | 0.7  | 0.25 | 1     | 0.75 | 1.25 | 1 |
|     | 0.13    | 1 b0182 |     | 0.73 | 0.42 | 1     | 1.27 | 0.56 | 1 |
|     | 0.11    | 1 b1539 |     | 0.84 | 0.26 | 0     | 0.9  | 0.38 | 1 |
|     | 0.18    | 1 b4113 |     | 0.62 | 0.36 | 1     | 0.67 | 0.71 | 1 |
|     | 0.2     | 1       |     | 1.77 | 0.55 | 0     | 1.5  | 0.3  | 0 |
|     | 0.11    | 1 b3739 |     | 0.3  | 0.16 | 1     | 0.8  | 1.04 | 1 |
|     | 0.22    | 1 b3261 |     | 0.72 | 0.35 | 0     | 0.94 | 0.78 | 1 |
|     | 0.05    | 1       |     | 1.43 | 0.25 | 0     | 2.47 | 2.22 | 0 |
|     | 0.04    | 1       |     | 1.24 | 0.8  | 0     | 1.78 | 1.24 | 0 |
|     | 0.14    | 1       |     | 1.48 | 0.55 | 0     | 2.51 | 0.76 | 0 |
|     | 0.29    | 1 b3187 |     | 0.74 | 0.15 | 1     | 1.06 | 0.46 | 1 |
| n/a | n/a     |         | n/a | n/a  |      | 0 n/a | n/a  |      | 0 |
|     | 0.2     | 1 b0058 |     | 1.09 | 0.32 | 0     | 1.6  | 0.53 | 0 |
|     | 0.22    | 1 b0114 |     | 1.69 | 0.41 | 1     | 0.59 | 0.59 | 1 |
| n/a | n/a     |         | n/a | n/a  |      | 0 n/a | n/a  |      | 0 |
|     | 0.19    | 1       |     | 1.19 | 0.13 | 1     | 0.64 | 1.82 | 1 |
|     | 0.11    | 1 b0191 |     | 0.76 | 0.63 | 0     | 1.23 | 0.45 | 0 |
|     | 0.1 n/a | b1525   |     | 1.36 | 0.27 | 0     | 1.1  | 0.24 | 1 |
|     | 0.09    | 1 b0642 |     | 0.34 | 0.34 | 1     | 0.78 | 0.95 | 1 |
| n/a | n/a     |         | n/a | n/a  |      | 0 n/a | n/a  |      | 0 |
|     | 0.11    | 1       |     | 0.95 | 0.51 | 0     | 1.16 | 0.64 | 0 |
|     | 0.18    | 1       |     | 1.73 | 0.69 | 0     | 1.53 | 0.76 | 0 |
|     | 0.12    | 1       |     | 1.52 | 0.53 | 0     | 1.74 | 0.63 | 0 |
| n/a | n/a     |         | n/a | n/a  |      | 0 n/a | n/a  |      | 0 |
|     | 0.11    | 1 b4377 |     | 1.24 | 0.44 | 0     | 1.73 | 0.86 | 0 |
|     | 0.19    | 1       |     | 1.3  | 0.51 | 0     | 1.86 | 0.52 | 0 |
| n/a | n/a     |         | n/a | n/a  |      | 0 n/a | n/a  |      | 0 |
| n/a | n/a     |         | n/a | n/a  |      | 0 n/a | n/a  |      | 0 |
| n/a | n/a     |         | n/a | n/a  |      | 0 n/a | n/a  |      | 0 |
|     | 0.17    | 1 b4143 |     | 1.31 | 0.34 | 1     | 0.68 | 0.85 | 1 |
|     | 0.22    | 1 b0224 |     | 0.63 | 0.36 | 0     | 0.81 | 0.36 | 1 |
| n/a | n/a     |         | n/a | n/a  |      | 0 n/a | n/a  |      | 0 |
|     | 0.25    | 1 b0966 |     | 1.15 | 0.61 | 0     | 1.66 | 1.47 | 1 |
|     | 0.15    | 1 b1013 |     | 1.45 | 0.3  | 0     | 1.63 | 0.35 | 0 |
|     | 0.15    | 1 b1056 |     | 1.45 | 0.23 | 0     | 1.44 | 0.54 | 0 |
|     | 0.13    | 0 b1103 |     | 0.83 | 0.51 | 0     | 1.15 | 1.01 | 1 |
|     | 0.1     | 1       |     | 1.72 | 0.57 | 0     | 1.88 | 0.62 | 0 |
|     | 0.18    | 0 b3280 |     | 1.1  | 0.35 | 0     | 1.5  | 0.47 | 0 |
|     | 0.19    | 1       |     | 0.9  | 0.35 | 0     | 1.17 | 0.32 | 1 |
|     | 0.18    | 1 b3396 |     | 0.87 | 0.37 | 0     | 1.22 | 0.6  | 0 |
| n/a | n/a     |         | n/a | n/a  |      | 0 n/a | n/a  |      | 0 |
|     | 0.11    | 1 b3436 |     | 1.43 | 0.56 | 0     | 1.99 | 0.81 | 0 |
|     | 0.09    | 1       |     | 1.57 | 0.51 | 0     | 1.71 | 0.49 | 0 |
|     | 0.3     | 1       |     | 1.37 | 0.78 | 0     | 2.36 | 0.98 | 0 |
|     | 0.09    | 1 b1514 |     | 1.62 | 0.61 | 1     | 1.35 | 1.12 | 0 |

|     |      |           |     |      |      |     |      |      |   |
|-----|------|-----------|-----|------|------|-----|------|------|---|
| n/a | n/a  |           | n/a | n/a  | 0    | n/a | n/a  | 0    |   |
|     | 0.22 | 1 b2731   |     | 1.88 | 0.88 | 1   | 1.93 | 0.53 | 0 |
|     | 0.16 | n/a b2737 |     | 1.61 | 2.25 | 0   | 2.12 | 1.15 | 0 |
|     | 0.31 | 1 b3945   |     | 3.47 | 1.14 | 1   | 1.63 | 9.21 | 1 |
|     | 0.17 | 1 b2722   |     | 1.26 | 0.39 | 0   | 1.47 | 0.26 | 0 |
|     | 0.23 | n/a       |     | 0.89 | 0.53 | 0   | 1.46 | 2.15 | 0 |
| n/a | n/a  |           | n/a | n/a  | 0    | n/a | n/a  | 0    |   |
|     | 0.28 | 0 b2398   |     | 1.28 | 0.28 | 0   | 1.53 | 0.74 | 0 |
|     | 0.17 | 1 b2469   |     | 1.63 | 0.52 | 0   | 1.4  | 0.72 | 0 |
| n/a | n/a  |           | n/a | n/a  | 0    | n/a | n/a  | 0    |   |
|     | 0.11 | 1 b3925   |     | 1.08 | 8.57 | 0   | 1.66 | 0.25 | 0 |
| n/a | n/a  |           | n/a | n/a  | 0    | n/a | n/a  | 0    |   |
|     | 0.26 | 1 b4093   |     | 1.61 | 0.63 | 0   | 1.74 | 0.65 | 0 |
| n/a | n/a  |           | n/a | n/a  | 0    | n/a | n/a  | 0    |   |
|     | 0.16 | 1 b2407   |     | 1.44 | 0.24 | 0   | 1.34 | 0.65 | 1 |
|     | 0.08 | 1         |     | 3.11 | 1.12 | 1   | 1.72 | 0.95 | 0 |
|     | 0.06 | 1 b1602   |     | 0.65 | 0.22 | 1   | 0.93 | 1.19 | 1 |
|     | 0.14 | n/a       |     | 1.28 | 0.75 | 0   | 2    | 0.81 | 0 |
|     | 0.18 | 1         |     | 1.22 | 0.68 | 0   | 2    | 0.61 | 0 |
|     | 0.21 | 1 b4183   |     | 1.53 | 0.71 | 0   | 1.56 | 0.8  | 0 |
|     | 0.27 | 1 b4220   |     | 0.91 | 0.59 | 0   | 1.37 | 0.55 | 1 |
|     | 0.21 | 1 b4233   |     | 0.84 | 0.4  | 1   | 0.74 | 0.24 | 1 |
|     | 0.17 | 1         |     | 1.45 | 0.5  | 0   | 2.03 | 0.55 | 1 |
| n/a | n/a  |           | n/a | n/a  | 0    | n/a | n/a  | 0    |   |
|     | 0.19 | 1 b4337   |     | 1.43 | 0.75 | 0   | 1.65 | 0.77 | 0 |
|     | 0.2  | 1         |     | 1.05 | 0.22 | 1   | 1.18 | 0.53 | 1 |
|     | 0.19 | 1 b1718   |     | 0.5  | 0.08 | 1   | 0.23 | 0.45 | 1 |
|     | 0.1  | 1         |     | 1.64 | 0.46 | 0   | 1.57 | 0.48 | 0 |
|     | 0.09 | 1         |     | 2.09 | 0.6  | 0   | 1.36 | 0.39 | 0 |
| n/a | n/a  |           | n/a | n/a  | 0    | n/a | n/a  | 0    |   |
|     | 0.05 | 0 b1051   |     | 1.25 | 1.95 | 0   | 2.21 | 0.9  | 0 |
|     | 0.06 | 1 b1787   |     | 1.93 | 0.81 | 0   | 1.63 | 0.76 | 0 |
|     | 0.08 | 1         |     | 0.64 | 0.43 | 1   | 0.86 | 1.2  | 1 |
|     | 0.13 | 1 b1059   |     | 1.44 | 0.45 | 0   | 1.39 | 0.48 | 0 |
|     | 0.11 | 1 b1767   |     | 0.71 | 0.53 | 1   | 0.55 | 0.47 | 1 |
|     | 0.21 | 1         |     | 0.41 | 0.13 | 1   | 0.34 | 0.59 | 1 |
|     | 0.16 | 1 b1739   |     | 1.25 | 1.41 | 0   | 1.03 | 0.91 | 0 |
| n/a | n/a  |           | n/a | n/a  | 0    | n/a | n/a  | 0    |   |
|     | 0.13 | 1 b1637   |     | 0.51 | 0.21 | 1   | 0.65 | 0.32 | 1 |
|     | 0.18 | 1 b1680   |     | 3.87 | 2.53 | 1   | 5.47 | 2.03 | 1 |
|     | 0.15 | 1 b1069   |     | 0.86 | 0.13 | 1   | 1.1  | 0.27 | 1 |
|     | 0.19 | 1         |     | 1.39 | 0.62 | 0   | 2.02 | 0.69 | 0 |
|     | 0.29 | 1 b3740   |     | 0.56 | 0.21 | 1   | 0.93 | 0.35 | 1 |
|     | 0.22 | 0 b2579   |     | 1.6  | 0.47 | 0   | 1.54 | 0.76 | 0 |
|     | 0.13 | 1 b0188   |     | 1.31 | 0.37 | 1   | 1.43 | 0.96 | 1 |
|     | 0.07 | 1 b0403   |     | 1.86 | 0.47 | 1   | 0.97 | 0.61 | 1 |
|     | 0.14 | 1 b4020   |     | 1.49 | 0.4  | 0   | 1.29 | 0.5  | 0 |
|     | 0.07 | 1 b4067   |     | 0.98 | 0.38 | 0   | 1.81 | 2.32 | 0 |
|     | 0.11 | 1 b1745   |     | 1.28 | 0.63 | 0   | 1.43 | 1.47 | 0 |
|     | 0.16 | 1 b1706   |     | 1.11 | 0.48 | 0   | 1.26 | 1.56 | 1 |
|     | 0.09 | 1 b1647   |     | 1.77 | 0.54 | 0   | 1.4  | 0.71 | 0 |
| n/a | n/a  |           | n/a | n/a  | 0    | n/a | n/a  | 0    |   |

|      |     |       |       |       |   |       |      |   |
|------|-----|-------|-------|-------|---|-------|------|---|
| 0.11 | 1   | b2041 | 0.69  | 0.56  | 1 | 1.12  | 1.09 | 1 |
| 0.12 | 1   |       | 1.24  | 0.52  | 0 | 1.8   | 0.63 | 0 |
| 0.09 | 1   | b0157 | 1.18  | 0.26  | 0 | 1.79  | 0.34 | 0 |
| 0.17 | 1   | b0042 | 1.63  | 0.35  | 0 | 1.57  | 0.36 | 0 |
| 0.22 | 1   | b0111 | 1.66  | 0.38  | 1 | 1.36  | 0.69 | 1 |
| 0.22 | 1   | b3527 | 0.88  | 0.51  | 0 | 1.29  | 0.8  | 1 |
| 0.15 | 1   | b3423 | 0.83  | 0.45  | 0 | 1.24  | 0.53 | 0 |
| 0.14 | 1   | b2260 | 1.03  | 0.34  | 1 | 1.64  | 0.86 | 1 |
| 0.19 | 1   | b2512 | 0.66  | 0.25  | 0 | 1.42  | 0.33 | 0 |
| 0.13 | n/a |       | 1.52  | 0.31  | 0 | 2.1   | 1.49 | 0 |
| 0.15 | 1   |       | 0.91  | 0.43  | 0 | 1.45  | 0.69 | 0 |
| 0.09 | 1   | b4387 | 0.91  | 0.34  | 0 | 0.97  | 0.6  | 0 |
| 0.11 | 1   | b3573 | 1.44  | 0.22  | 0 | 1.44  | 0.54 | 0 |
| 0.29 | 1   |       | 1.42  | 0.51  | 0 | 1.43  | 0.66 | 0 |
| 0.22 | 1   | b3397 | 1.12  | 2     | 0 | 1.03  | 1.54 | 0 |
| 0.06 | 1   | b2246 | 1.6   | 0.42  | 0 | 1.51  | 1.46 | 0 |
| 0.1  | 1   | b2497 | 1.06  | 1.7   | 0 | 1.19  | 1.25 | 0 |
| 0.14 | 1   | b2296 | 0.62  | 0.17  | 1 | 0.65  | 0.77 | 1 |
| 0.05 | 1   |       | 1.53  | 0.75  | 0 | 2.01  | 3.88 | 0 |
| 0.12 | 1   | b0521 | 1.82  | 0.83  | 0 | 1.61  | 0.59 | 0 |
| 0.11 | 1   | b4218 | 0.96  | 0.26  | 0 | 1.27  | 0.39 | 0 |
| n/a  | n/a |       | n/a   | n/a   | 0 | n/a   | n/a  | 0 |
| 0.28 | 1   | b3028 | 1.22  | 0.3   | 0 | 1.39  | 0.46 | 0 |
| 0.22 | 1   |       | 0.86  | 0.23  | 1 | 0.79  | 0.22 | 1 |
| 0.14 | 1   | b2169 | 1.48  | 0.28  | 0 | 1.86  | 0.71 | 0 |
| 0.12 | 1   | b2235 | 0.69  | 0.33  | 1 | 0.4   | 0.2  | 1 |
| 0.15 | 1   | b2439 | 1.49  | 0.16  | 0 | 2.15  | 0.46 | 0 |
| 0.15 | 1   |       | 1.21  | 0.38  | 0 | 0.98  | 0.35 | 1 |
| 0.16 | 0   | b0685 | 1.47  | 0.49  | 0 | 1.81  | 0.33 | 0 |
| 0.13 | 1   |       | 1.58  | 0.73  | 0 | 1.8   | 0.87 | 0 |
| 0.11 | 1   |       | 0.82  | 0.23  | 0 | 0.81  | 0.42 | 1 |
| 0.16 | 1   | b3859 | 0.71  | 0.37  | 1 | 0.6   | 0.5  | 1 |
| 0.12 | 1   | b0836 | 2.05  | 0.63  | 0 | 1.9   | 0.84 | 0 |
| 0.18 | 1   | b3355 | 0.87  | 0.26  | 0 | 1.46  | 0.8  | 0 |
| 0.21 | 1   | b4018 | 0.64  | 0.24  | 1 | 0.93  | 0.47 | 1 |
| 0.1  | 1   |       | 1.06  | 0.62  | 0 | 0.95  | 0.23 | 1 |
| 0.26 | 1   | b3296 | 0.25  | 0.07  | 1 | 0.23  | 2.06 | 1 |
| 0.11 | 1   | b2144 | 0.96  | 0.23  | 0 | 1.66  | 0.62 | 0 |
| 0.1  | 1   |       | 1.71  | 0.4   | 0 | 1.58  | 0.59 | 1 |
| 0.13 | 1   | b4003 | 1.3   | 0.2   | 1 | 1.24  | 0.69 | 1 |
| 0.16 | 1   |       | 1.09  | 0.46  | 0 | 1.83  | 0.61 | 0 |
| 0.1  | 1   | b2829 | 0.83  | 0.62  | 1 | 0.94  | 0.28 | 1 |
| 0.2  | n/a |       | 0.83  | 0.18  | 0 | 1.18  | 0.84 | 0 |
| 0.09 | 1   |       | 1.64  | 0.24  | 1 | 0.87  | 0.54 | 1 |
| 0.14 | 1   | b3239 | 1.72  | 0.6   | 0 | 1.63  | 0.34 | 0 |
| 0.12 | 1   |       | 1.75  | 0.38  | 0 | 1.49  | 0.43 | 0 |
| 0.12 | 1   |       | 1.76  | 0.52  | 0 | 2.15  | 1.55 | 0 |
| 0.18 | 1   | b0027 | 0.9   | 0.16  | 1 | 1.11  | 0.36 | 0 |
| 0.31 | 0   |       | 1.46  | 0.54  | 0 | 1.37  | 0.68 | 0 |
| 0.11 | 1   |       | 1.37  | 0.32  | 0 | 1.24  | 0.61 | 0 |
| 0.16 | 1   | b3877 | 1.49  | 0.55  | 0 | 1.62  | 1.17 | 0 |
| 0.12 | 1   | b2392 | 42.34 | 41.41 | 1 | 10.21 | 5.4  | 1 |

|      |     |       |      |      |   |      |       |   |
|------|-----|-------|------|------|---|------|-------|---|
| 0.1  | 1   | b2149 | 1.15 | 0.21 | 1 | 1    | 0.76  | 1 |
| 0.04 | 1   | b1687 | 1.45 | 0.57 | 0 | 1.18 | 0.46  | 0 |
| 0.08 | 1   | b1225 | 2.23 | 1.37 | 0 | 1.24 | 0.49  | 0 |
| 0.13 | 1   | b1194 | 1.17 | 0.42 | 0 | 2.03 | 6.63  | 0 |
| 0.1  | 1   |       | 1.17 | 0.62 | 0 | 1.5  | 0.48  | 0 |
| 0.06 | 1   | b2789 | 2.18 | 0.35 | 1 | 1.72 | 0.98  | 1 |
| 0.19 | 1   | b2834 | 1.08 | 0.69 | 0 | 1.24 | 0.36  | 1 |
| 0.18 | 1   | b3847 | 0.56 | 0.19 | 1 | 0.67 | 0.29  | 1 |
| 0.14 | 1   | b3433 | 0.5  | 0.16 | 1 | 0.72 | 0.29  | 1 |
| 0.11 | 1   | b0053 | 0.48 | 0.11 | 1 | 0.4  | 0.25  | 1 |
| 0.08 | 1   | b3788 | 0.72 | 0.19 | 1 | 0.74 | 0.25  | 1 |
| 0.11 | 1   | b3770 | 1.25 | 0.51 | 0 | 1.27 | 0.44  | 0 |
| 0.04 | 1   | b1236 | 0.94 | 0.16 | 1 | 0.84 | 0.24  | 1 |
| 0.09 | 1   | b3987 | 0.45 | 0.17 | 1 | 0.59 | 0.68  | 1 |
| 0.11 | 1   |       | 0.98 | 0.29 | 0 | 1.29 | 0.3   | 0 |
| 0.13 | 1   | b0063 | 1.45 | 0.3  | 0 | 1.54 | 1.06  | 0 |
| 0.15 | 1   | b1244 | 0.92 | 0.28 | 0 | 1.02 | 0.92  | 0 |
| 0.03 | 1   | b2132 | 1.17 | 0.52 | 0 | 0.76 | 0.73  | 1 |
| 0.14 | n/a |       | 0.73 | 0.37 | 1 | 0.98 | 0.5   | 1 |
| 0.05 | 1   | b0595 | 2.55 | 0.99 | 1 | 2.19 | 0.56  | 0 |
| 0.08 | 1   | b1278 | 1.55 | 0.27 | 1 | 1.5  | 0.35  | 0 |
| 0.09 | 1   | b1233 | 0.67 | 0.46 | 0 | 0.8  | 0.53  | 1 |
| n/a  | n/a |       | n/a  | n/a  | 0 | n/a  | n/a   | 0 |
| 0.11 | 1   | b1424 | 0.47 | 0.23 | 1 | 0.9  | 0.74  | 1 |
| 0.1  | 1   |       | 1.42 | 0.3  | 0 | 1.26 | 0.35  | 0 |
| 0.08 | 1   |       | 0.81 | 0.44 | 1 | 1    | 0.38  | 1 |
| 0.12 | 1   | b0476 | 2.39 | 0.72 | 1 | 2.03 | 1.3   | 0 |
| 0.11 | 1   |       | 1.48 | 0.31 | 0 | 1.54 | 0.16  | 0 |
| 0.16 | 1   | b3657 | 1.59 | 0.26 | 0 | 1.82 | 0.5   | 0 |
| 0.09 | 1   | b1464 | 1.07 | 0.25 | 1 | 1.44 | 0.58  | 0 |
| 0.06 | 1   | b1272 | 0.94 | 3.75 | 0 | 1.23 | 0.21  | 1 |
| 0.1  | 1   | b1431 | 1.21 | 0.29 | 1 | 1.17 | 0.33  | 1 |
| 0.1  | 1   |       | 1.28 | 0.44 | 0 | 1.63 | 0.26  | 0 |
| 0.1  | n/a |       | 0.92 | 0.41 | 0 | 0.94 | 2.27  | 0 |
| 0.15 | 1   |       | 1.5  | 0.44 | 0 | 1.6  | 0.48  | 0 |
| 0.11 | 1   | b1849 | 1.4  | 0.24 | 1 | 1.84 | 0.5   | 0 |
| 0.11 | 1   |       | 1.12 | 0.22 | 1 | 1.33 | 1.37  | 0 |
| 0.12 | 1   | b1280 | 0.94 | 0.34 | 0 | 1.23 | 0.13  | 0 |
| 0.09 | 1   | b2610 | 1.02 | 0.19 | 1 | 0.85 | 1.27  | 1 |
| 0.13 | 1   |       | 1.11 | 0.43 | 0 | 1.77 | 0.44  | 0 |
| n/a  | n/a |       | n/a  | n/a  | 0 | n/a  | n/a   | 0 |
| 0.09 | 1   |       | 1.36 | 0.27 | 1 | 1.26 | 0.29  | 0 |
| 0.08 | 1   |       | 1.79 | 0.51 | 0 | 1.75 | 0.53  | 0 |
| n/a  | n/a |       | n/a  | n/a  | 0 | n/a  | n/a   | 0 |
| 0.04 | 0   |       | 1.3  | 0.11 | 0 | 2.2  | 0.39  | 0 |
| 0.11 | 1   | b3599 | 0.77 | 0.35 | 1 | 0.82 | 0.67  | 1 |
| 0.19 | 1   |       | 1.76 | 0.23 | 0 | 1.48 | 0.82  | 0 |
| 0.08 | 1   | b2802 | 2.32 | 0.22 | 0 | 1.47 | 0.29  | 0 |
| 0.07 | 1   |       | 1.44 | 0.59 | 0 | 1.47 | 0.85  | 0 |
| 0.16 | 1   |       | 1.29 | 8.02 | 0 | 1.41 | 0.61  | 0 |
| 0.11 | 1   | b3519 | 1.38 | 0.2  | 1 | 1.25 | 0.37  | 0 |
| 0.21 | 1   | b2955 | 0.56 | 0.49 | 1 | 0.59 | 85.72 | 1 |

|      |     |       |      |      |   |      |       |   |
|------|-----|-------|------|------|---|------|-------|---|
| 0.14 | 1   | b3604 | 1.12 | 0.38 | 0 | 1.78 | 0.95  | 0 |
| 0.13 | 1   |       | 1.7  | 0.49 | 0 | 1.62 | 0.32  | 0 |
| 0.07 | 1   |       | 1.29 | 0.56 | 0 | 1.87 | 0.33  | 0 |
| 0.08 | 1   | b2127 | 1.27 | 0.21 | 0 | 1.45 | 0.42  | 0 |
| 0.1  | 1   |       | 1.2  | 0.35 | 0 | 1.21 | 0.57  | 1 |
| 0.07 | 1   | b2058 | 1.23 | 0.35 | 0 | 1.49 | 1.62  | 0 |
| 0.08 | 1   | b2136 | 1.32 | 0.29 | 0 | 1.68 | 0.37  | 0 |
| 0.08 | 1   | b3284 | 1.47 | 0.28 | 1 | 1.36 | 0.19  | 1 |
| 0.16 | 1   | b3521 | 1.12 | 0.72 | 0 | 2.13 | 0.53  | 0 |
| 0.06 | 1   | b1181 | 1.12 | 0.63 | 0 | 1.31 | 0.4   | 0 |
| 0.07 | 1   | b3553 | 1.01 | 0.09 | 1 | 1.26 | 0.64  | 1 |
| 0.11 | 1   |       | 1.69 | 0.25 | 0 | 1.83 | 0.22  | 0 |
| 0.08 | 1   | b3208 | 1.14 | 0.22 | 0 | 1.32 | 0.46  | 0 |
| 0.06 | 1   | b4262 | 0.94 | 0.11 | 0 | 1.36 | 0.38  | 0 |
| 0.1  | 1   | b4135 | 0.89 | 0.08 | 1 | 0.87 | 0.39  | 1 |
| 0.18 | 1   | b3191 | 1.18 | 0.44 | 0 | 1.13 | 0.24  | 0 |
| 0.17 | 1   | b3117 | 3.99 | 1.4  | 1 | 1.59 | 0.48  | 0 |
| 0.14 | 1   | b2993 | 1.76 | 0.84 | 0 | 1.52 | 0.85  | 0 |
| 0.1  | 1   | b2705 | 2.1  | 0.24 | 1 | 1.72 | 0.89  | 0 |
| n/a  | n/a |       | n/a  | n/a  | 0 | n/a  | n/a   | 0 |
| 0.08 | n/a |       | 1.22 | 0.37 | 0 | 1.84 | 1.82  | 0 |
| 0.04 | 1   |       | 1.53 | 0.47 | 0 | 1.68 | 0.43  | 0 |
| n/a  | n/a |       | n/a  | n/a  | 0 | n/a  | n/a   | 0 |
| 0.05 | 1   | b2168 | 1.48 | 0.9  | 0 | 1.64 | 0.61  | 0 |
| 0.16 | 1   | b3283 | 1.03 | 0.27 | 1 | 1.33 | 0.54  | 1 |
| 0.18 | 1   | b3314 | 0.36 | 0.09 | 1 | 0.36 | 0.45  | 1 |
| 0.05 | 1   |       | 1.12 | 0.34 | 1 | 1.14 | 0.42  | 1 |
| 0.08 | 1   | b0851 | 0.78 | 0.3  | 1 | 0.96 | 0.6   | 1 |
| 0.12 | 1   | b3050 | 0.98 | 0.66 | 0 | 1.94 | 0.64  | 0 |
| 0.1  | 1   | b2943 | 0.93 | 0.19 | 1 | 1.39 | 0.23  | 0 |
| 0.11 | 1   | b0965 | 0.94 | 0.29 | 1 | 1.21 | 0.55  | 0 |
| 0.07 | 1   | b0783 | 2.06 | 0.34 | 1 | 1.45 | 0.35  | 0 |
| 0.04 | 1   | b0831 | 1.63 | 0.4  | 0 | 1.59 | 0.33  | 0 |
| 0.13 | 1   |       | 0.46 | 0.18 | 1 | 0.22 | 0.47  | 1 |
| 0.15 | 1   | b0737 | 0.7  | 0.1  | 1 | 1.14 | 0.29  | 1 |
| 0.11 | 1   | b0775 | 1.36 | 0.31 | 0 | 1.47 | 1.58  | 0 |
| 0.07 | 1   | b0821 | 1.02 | 0.16 | 0 | 1.59 | 0.8   | 0 |
| 0.06 | 1   | b3213 | 1.33 | 0.22 | 0 | 1.45 | 0.32  | 0 |
| 0.13 | 1   |       | 1.16 | 0.34 | 0 | 1.35 | 0.49  | 0 |
| 0.08 | 1   | b2597 | 6.66 | 1.21 | 1 | 8.85 | 15.93 | 1 |
| 0.08 | 1   | b2340 | 1.66 | 0.55 | 1 | 1.35 | 0.79  | 0 |
| 0.12 | 1   | b4045 | 1.52 | 0.2  | 0 | 1.61 | 0.61  | 0 |
| 0.16 | 1   | b3295 | 0.43 | 0.27 | 1 | 0.24 | 1.21  | 1 |
| 0.06 | 1   | b1294 | 0.53 | 0.17 | 1 | 0.93 | 0.33  | 1 |
| 0.06 | 1   | b0450 | 1.09 | 0.35 | 0 | 1.3  | 0.55  | 0 |
| 0.18 | 1   |       | 1.37 | 0.22 | 1 | 1.25 | 0.37  | 1 |
| 0.11 | 1   |       | 1.4  | 0.51 | 0 | 1.81 | 0.39  | 0 |
| 0.22 | 1   | b3975 | 0.6  | 0.41 | 1 | 1.25 | 0.32  | 1 |
| n/a  | n/a |       | n/a  | n/a  | 0 | n/a  | n/a   | 0 |
| n/a  | n/a |       | n/a  | n/a  | 0 | n/a  | n/a   | 0 |
| n/a  | n/a |       | n/a  | n/a  | 0 | n/a  | n/a   | 0 |
| 0.07 | n/a |       | 1.28 | 0.37 | 0 | 1.39 | 0.35  | 0 |

|     |          |         |       |       |       |       |       |   |
|-----|----------|---------|-------|-------|-------|-------|-------|---|
|     | 0.14     | 1 b1848 | 8.75  | 2.99  | 1     | 8.83  | 8.77  | 1 |
| n/a | n/a      |         | n/a   | n/a   | 0 n/a | n/a   |       | 0 |
| n/a | n/a      |         | n/a   | n/a   | 0 n/a | n/a   |       | 0 |
|     | 0.17     | 1 b3928 | 1.28  | 0.5   | 1     | 1.03  | 0.63  | 1 |
|     | 0.04     | 1 b2748 | 0.42  | 0.09  | 1     | 0.91  | 0.54  | 1 |
|     | 0.11     | 1       | 1.22  | 0.2   | 1     | 1.49  | 0.33  | 0 |
|     | 0.04     | 1 b1685 | 1.48  | 0.16  | 1     | 1.71  | 0.5   | 0 |
|     | 0.08 n/a | b1639   | 0.94  | 0.17  | 0     | 1.43  | 0.48  | 0 |
|     | 0.09     | 1       | 1.56  | 0.78  | 0     | 2.1   | 2.14  | 0 |
|     | 0.11     | 1 b2456 | 1.61  | 0.36  | 0     | 1.69  | 0.39  | 0 |
|     | 0.05     | 1 b0119 | 0.93  | 0.21  | 0     | 1.48  | 0.39  | 0 |
|     | 0.22 n/a |         | 1.88  | 0.41  | 0     | 1.76  | 0.56  | 0 |
|     | 0.13     | 1       | 1.4   | 0.45  | 0     | 1.79  | 0.6   | 0 |
|     | 0.04     | 1 b1820 | 1.44  | 0.41  | 1     | 1.47  | 0.65  | 0 |
|     | 0.05     | 1 b1841 | 0.52  | 0.1   | 1     | 0.68  | 0.22  | 1 |
|     | 0.05     | 1       | 1.29  | 0.2   | 0     | 2.38  | 0.95  | 0 |
|     | 0.11     | 0       | 1.47  | 0.53  | 0     | 1.85  | 0.9   | 0 |
| n/a | n/a      |         | n/a   | n/a   | 0 n/a | n/a   |       | 0 |
| n/a | n/a      |         | n/a   | n/a   | 0 n/a | n/a   |       | 0 |
| n/a | n/a      |         | n/a   | n/a   | 0 n/a | n/a   |       | 0 |
| n/a | n/a      |         | n/a   | n/a   | 0 n/a | n/a   |       | 0 |
| n/a | n/a      |         | n/a   | n/a   | 0 n/a | n/a   |       | 0 |
| n/a | n/a      |         | n/a   | n/a   | 0 n/a | n/a   |       | 0 |
| n/a | n/a      |         | n/a   | n/a   | 0 n/a | n/a   |       | 0 |
| n/a | n/a      |         | n/a   | n/a   | 0 n/a | n/a   |       | 0 |
| n/a | n/a      |         | n/a   | n/a   | 0 n/a | n/a   |       | 0 |
| n/a | n/a      |         | n/a   | n/a   | 0 n/a | n/a   |       | 0 |
| n/a | n/a      |         | n/a   | n/a   | 0 n/a | n/a   |       | 0 |
| n/a | n/a      |         | n/a   | n/a   | 0 n/a | n/a   |       | 0 |
| n/a | n/a      |         | n/a   | n/a   | 0 n/a | n/a   |       | 0 |
| n/a | n/a      |         | n/a   | n/a   | 0 n/a | n/a   |       | 0 |
| n/a | 0.09 n/a |         | 0.38  | 0.06  | 1     | 0.7   | 0.33  | 1 |
| n/a | n/a      |         | n/a   | n/a   | 0 n/a | n/a   |       | 0 |
|     | 0.04 n/a |         | 1.41  | 0.26  | 1     | 0.81  | 1.24  | 1 |
| n/a | n/a      |         | n/a   | n/a   | 0 n/a | n/a   |       | 0 |
| n/a | n/a      |         | n/a   | n/a   | 0 n/a | n/a   |       | 0 |
|     | 0.09 n/a | b2579   | 1.75  | 2.19  | 0     | 1.69  | 0.29  | 0 |
|     | 0.13     | 1       | 1.46  | 0.29  | 0     | 0.88  | 7.04  | 1 |
|     | 0.06     | 1       | 1.62  | 0.56  | 0     | 2.14  | 0.81  | 0 |
|     | 0.08     | 1       | 1.95  | 0.53  | 0     | 1.13  | 1.08  | 0 |
|     | 0.07 n/a |         | 1.08  | 0.21  | 1     | 1.15  | 0.4   | 1 |
|     | 0.09     | 1       | 1.2   | 0.49  | 0     | 1.05  | 1.31  | 0 |
|     | 0.08     | 1       | 1.13  | 0.14  | 0     | 1.29  | 0.65  | 0 |
|     | 0.1      | 1       | 1.07  | 0.22  | 0     | 1.42  | 0.55  | 1 |
|     | 0.14     | 1       | 1.4   | 0.28  | 0     | 1.46  | 0.55  | 0 |
|     | 0.14     | 1       | 1.52  | 0.32  | 0     | 1.98  | 0.63  | 0 |
|     | 0.09 n/a |         | 1.29  | 0.39  | 1     | 1.47  | 0.69  | 1 |
|     | 0.05     | 1       | 0.76  | 0.08  | 1     | 1.29  | 0.71  | 1 |
|     | 0.05     | 1 b1580 | 1.22  | 0.15  | 1     | 1.26  | 0.22  | 0 |
|     | 0.2      | 1       | 1.21  | 0.32  | 0     | 1.29  | 0.37  | 0 |
|     | 0.08     | 1       | 14.72 | 11.25 | 1     | 25.99 | 13.15 | 1 |
|     | 0.05 n/a |         | 1.79  | 10.92 | 1     | 2.34  | 1.69  | 1 |
|     | 0.05     | 1       | 1.04  | 0.4   | 0     | 1.37  | 0.92  | 1 |
|     | 0.03     | 1       | 1.43  | 0.32  | 0     | 1.71  | 0.39  | 0 |

|      |     |       |      |      |   |      |       |   |
|------|-----|-------|------|------|---|------|-------|---|
| 0.07 | 1   |       | 1.49 | 0.58 | 0 | 1.29 | 0.42  | 0 |
| 0.11 | n/a |       | 1.94 | 0.53 | 1 | 1.46 | 0.6   | 1 |
| 0.06 | n/a |       | 1.05 | 0.1  | 1 | 0.66 | 6.34  | 1 |
| 0.14 | 1   |       | 1.33 | 0.23 | 1 | 1.31 | 1.72  | 0 |
| 0.07 | 1   |       | 1.23 | 0.5  | 1 | 1.15 | 15.41 | 0 |
| 0.07 | 1   |       | 1.34 | 0.26 | 1 | 1.37 | 1.31  | 1 |
| 0.06 | 1   |       | 1.17 | 0.35 | 0 | 1.25 | 0.49  | 0 |
| 0.09 | n/a |       | 1.02 | 0.36 | 0 | 1.6  | 0.58  | 0 |
| 0.15 | 1   |       | 0.53 | 0.1  | 1 | 1.09 | 0.68  | 1 |
| 0.05 | 1   |       | 1.26 | 0.28 | 0 | 1.39 | 0.34  | 0 |
| 0.04 | 1   |       | 0.66 | 0.15 | 1 | 1    | 0.69  | 1 |
| 0.06 | 1   |       | 1.51 | 0.19 | 0 | 2.13 | 0.63  | 0 |
| 0.15 | 1   | b3560 | 0.41 | 0.21 | 1 | 0.88 | 0.26  | 1 |
| 0.24 | 1   |       | 1.66 | 0.44 | 0 | 1.56 | 0.75  | 0 |
| 0.11 | 1   |       | 1.15 | 0.33 | 0 | 1.51 | 0.89  | 0 |
| 0.13 | 1   |       | 1.14 | 0.3  | 0 | 1.49 | 0.51  | 0 |
| 0.07 | 1   |       | 1.07 | 0.14 | 1 | 0.91 | 1     | 1 |
| 0.18 | 1   |       | 1.3  | 0.33 | 0 | 1.64 | 0.64  | 0 |
| 0.1  | 1   |       | 1.32 | 0.85 | 0 | 1.26 | 0.31  | 0 |
| 0.08 | 1   | b3248 | 0.95 | 0.35 | 1 | 1.1  | 0.34  | 1 |
| n/a  | n/a |       | n/a  | n/a  | 0 | n/a  | n/a   | 0 |
| 0.13 | 1   |       | 1.28 | 0.66 | 0 | 1.1  | 0.48  | 1 |
| 0.1  | 1   | b0997 | 1.84 | 0.43 | 0 | 1.79 | 0.5   | 0 |
| n/a  | n/a |       | n/a  | n/a  | 0 | n/a  | n/a   | 0 |
| 0.06 | 1   |       | 0.88 | 0.34 | 0 | 1.92 | 1.62  | 0 |
| 0.11 | 1   |       | 1.74 | 0.4  | 0 | 1.3  | 0.5   | 0 |
| 0.07 | 1   | b3728 | 0.74 | 0.55 | 0 | 1.04 | 0.17  | 1 |
| 0.1  | 1   | b3666 | 1.39 | 0.22 | 0 | 1.35 | 0.26  | 0 |
| 0.05 | n/a | b0045 | 1.28 | 0.3  | 0 | 1.67 | 0.38  | 0 |
| 0.1  | 1   | b0091 | 1.92 | 0.22 | 1 | 1.26 | 0.24  | 1 |
| 0.05 | 1   |       | 1.23 | 0.11 | 0 | 1.43 | 0.39  | 0 |
| 0.07 | 1   | b0082 | 0.83 | 0.44 | 1 | 0.92 | 0.28  | 1 |
| 0.15 | 1   | b3231 | 0.37 | 0.1  | 1 | 0.15 | 0.06  | 1 |
| 0.07 | 1   | b3256 | 0.19 | 0.1  | 1 | 0.17 | 0.18  | 1 |
| 0.05 | 1   |       | 1.7  | 0.26 | 0 | 1.63 | 0.6   | 0 |
| 0.07 | 1   | b0655 | 0.38 | 0.12 | 1 | 0.27 | 0.21  | 1 |
| 0.09 | 1   | b0688 | 0.47 | 0.09 | 1 | 0.22 | 0.21  | 1 |
| 0.1  | 1   | b0180 | 0.59 | 0.41 | 1 | 0.9  | 0.38  | 1 |
| 0.06 | 0   | b1541 | 1.67 | 0.89 | 0 | 1.77 | 0.65  | 0 |
| 0.2  | 1   | b2042 | 0.31 | 0.32 | 1 | 0.26 | 0.19  | 1 |
| 0.11 | 1   | b2069 | 1.28 | 0.57 | 0 | 1.5  | 0.79  | 0 |
| 0.09 | 1   | b0207 | 1.08 | 0.27 | 1 | 0.94 | 0.38  | 1 |
| 0.06 | 1   |       | 1.47 | 0.55 | 0 | 1.97 | 0.35  | 0 |
| 0.05 | 1   | b2077 | 1.18 | 0.26 | 0 | 1.53 | 0.21  | 0 |
| 0.07 | 1   |       | 1.42 | 0.5  | 0 | 1.58 | 0.64  | 0 |
| n/a  | n/a |       | n/a  | n/a  | 0 | n/a  | n/a   | 0 |
| n/a  | n/a |       | n/a  | n/a  | 0 | n/a  | n/a   | 0 |
| 0.14 | 1   | b2665 | 1.6  | 0.64 | 0 | 1.89 | 0.74  | 0 |
| 0.05 | n/a |       | 1.45 | 0.32 | 0 | 1.97 | 0.57  | 0 |
| n/a  | n/a |       | n/a  | n/a  | 0 | n/a  | n/a   | 0 |
| 0.19 | n/a |       | 1.34 | 0.37 | 0 | 1.56 | 0.68  | 0 |
| n/a  | n/a |       | n/a  | n/a  | 0 | n/a  | n/a   | 0 |



|     |          |         |     |       |       |       |      |        |   |
|-----|----------|---------|-----|-------|-------|-------|------|--------|---|
|     | 0.31     | 0 b3299 |     | 0.57  | 0.17  | 1     | 0.55 | 0.27   | 1 |
|     | 0.04     | 1       |     | 0.6   | 0.11  | 1     | 0.26 | 0.16   | 1 |
|     | 0.12     | 1       |     | 1.31  | 0.33  | 0     | 1.02 | 0.51   | 1 |
|     | 0.14     | 1       |     | 1.49  | 0.38  | 0     | 1.56 | 0.23   | 0 |
|     | 0.1      | 1       |     | 0.53  | 0.3   | 1     | 0.57 | 0.41   | 1 |
|     | 0.16     | 0 b1060 |     | 3.49  | 1.24  | 1     | 2.78 | 1.16   | 1 |
|     | 0.1      | 1 b1105 |     | 0.61  | 0.48  | 1     | 0.69 | 0.34   | 1 |
|     | 0.05     | 1       |     | 1.51  | 0.75  | 0     | 1.46 | 0.35   | 0 |
|     | 0.05     | 1 b1789 |     | 1.37  | 0.32  | 0     | 1.46 | 0.62   | 0 |
|     | 0.08     | 1       |     | 0.85  | 0.28  | 0     | 0.84 | 0.61   | 1 |
| n/a | n/a      |         | n/a | n/a   |       | 0 n/a | n/a  |        | 0 |
| n/a | n/a      |         | n/a | n/a   |       | 0 n/a | n/a  |        | 0 |
|     | 0.11     | 1 b4051 |     | 0.98  | 0.06  | 1     | 0.66 | 0.34   | 1 |
|     | 0.1      | 1 b4076 |     | 1.89  | 0.59  | 0     | 1.95 | 0.62   | 0 |
|     | 0.13     | 1 b2745 |     | 0.67  | 0.26  | 0     | 0.85 | 0.42   | 1 |
|     | 0.12     | 1 b4027 |     | 1.3   | 1.59  | 0     | 1.3  | 0.29   | 1 |
|     | 0.12     | 1       |     | 1.34  | 0.23  | 0     | 0.98 | 0.17   | 1 |
|     | 0.08     | 1       |     | 1.48  | 0.55  | 0     | 1.34 | 0.38   | 1 |
|     | 0.07     | 1 b2323 |     | 0.51  | 0.1   | 1     | 0.41 | 0.29   | 1 |
|     | 0.07     | 1       |     | 1.07  | 0.25  | 0     | 1.31 | 0.5    | 0 |
| n/a | n/a      |         | n/a | n/a   |       | 0 n/a | n/a  |        | 0 |
|     | 0.25     | 1 b3891 |     | 0.6   | 0.13  | 1     | 0.76 | 0.37   | 1 |
| n/a | n/a      |         | n/a | n/a   |       | 0 n/a | n/a  |        | 0 |
|     | 0.22     | 1 b4041 |     | 0.69  | 0.39  | 1     | 0.52 | 0.27   | 1 |
|     | 0.06     | 1       |     | 1.32  | 0.14  | 0     | 1.7  | 0.54   | 0 |
|     | 0.11     | 1       |     | 1.86  | 0.32  | 0     | 1.77 | 0.36   | 0 |
| n/a | n/a      |         | n/a | n/a   |       | 0 n/a | n/a  |        | 0 |
|     | 0.12     | 1       |     | 2.07  | 0.86  | 0     | 1.79 | 0.68   | 0 |
|     | 0.08     | 1 b2458 |     | 1.26  | 0.24  | 0     | 1.67 | 0.42   | 0 |
|     | 0.07     | 1 b1131 |     | 0.39  | 0.22  | 1     | 0.27 | 0.12   | 1 |
|     | 0.08     | 1 b1655 |     | 0.5   | 0.18  | 1     | 0.43 | 0.15   | 1 |
|     | 0.1 n/a  |         |     | 1.58  | 0.29  | 0     | 1.79 | 0.81   | 0 |
|     | 0.13     | 1 b2203 |     | 9.56  | 2.73  | 1     | 2.6  | 0.96   | 1 |
| n/a | n/a      |         | n/a | n/a   |       | 0 n/a | n/a  |        | 0 |
|     | 0.09     | 1       |     | 1.37  | 0.08  | 0     | 1.5  | 0.07   | 0 |
|     | 0.07     | 1 b2281 |     | 0.59  | 0.06  | 1     | 0.37 | 0.09   | 1 |
|     | 0.09     | 1 b2301 |     | 1.2   | 0.2   | 0     | 1.69 | 0.46   | 0 |
|     | 0.07     | 1 b1921 |     | 1.59  | 0.26  | 0     | 1.44 | 0.49   | 0 |
| n/a | n/a      |         | n/a | n/a   |       | 0 n/a | n/a  |        | 0 |
|     | 0.22     | 1 b1895 |     | 1.67  | 0.34  | 0     | 1.52 | 0.85   | 0 |
|     | 0.07     | 1 b1744 |     | 1.53  | 1.03  | 0     | 1.66 | 0.41   | 0 |
|     | 0.09     | 1 b1638 |     | 0.52  | 0.25  | 1     | 1.04 | 0.54   | 1 |
|     | 0.09     | 1       |     | 0.63  | 0.18  | 1     | 0.68 | 0.17   | 1 |
|     | 0.1      | 1       |     | 6.62  | 2.87  | 1     | 1.88 | 0.52   | 1 |
|     | 0.07     | 1 b1634 |     | 0.59  | 0.12  | 1     | 0.76 | 0.99   | 1 |
|     | 0.08 n/a |         |     | 1.4   | 0.35  | 0     | 1.58 | 0.44   | 0 |
|     | 0.07     | 1       |     | 1.85  | 7.52  | 0     | 1.19 | 0.41   | 0 |
|     | 0.05     | 1 b1632 |     | 1.25  | 0.38  | 0     | 1.26 | 0.57   | 1 |
|     | 0.05     | 1 b1658 |     | 0.51  | 0.29  | 1     | 0.68 | 0.41   | 1 |
|     | 0.1      | 1 b1682 |     | 21.77 | 11.08 | 1     | 8.96 | 152.18 | 1 |
|     | 0.12 n/a |         |     | 0.48  | 0.2   | 1     | 0.23 | 0.14   | 1 |
|     | 0.08     | 1 b1652 |     | 0.97  | 0.56  | 0     | 1.09 | 0.49   | 1 |

|     |          |         |      |      |       |      |       |   |
|-----|----------|---------|------|------|-------|------|-------|---|
|     | 0.08     | 0 b1600 | 1.41 | 0.07 | 0     | 1.69 | 0.43  | 0 |
| n/a | n/a      |         | n/a  | n/a  | 0 n/a | n/a  |       | 0 |
|     | 0.1      | 1       | 1.08 | 0.38 | 0     | 1.34 | 0.31  | 0 |
|     | 0.1      | 1 b2580 | 1.17 | 0.18 | 0     | 1.09 | 0.38  | 1 |
|     | 0.07     | 1 b0399 | 0.74 | 0.16 | 0     | 0.95 | 0.59  | 1 |
|     | 0.13     | 1 b0197 | 0.97 | 0.25 | 1     | 0.95 | 0.48  | 1 |
|     | 0.21     | 1       | 1.37 | 0.5  | 0     | 1.57 | 0.86  | 0 |
|     | 0.07     | 1       | 1.51 | 0.17 | 0     | 1.83 | 0.81  | 0 |
|     | 0.04     | 1 b1916 | 1.72 | 0.36 | 0     | 1.32 | 0.39  | 0 |
|     | 0.06     | 1 b1323 | 1.01 | 0.43 | 0     | 1.25 | 0.43  | 0 |
|     | 0.05     | 1 b3457 | 1.64 | 0.45 | 0     | 2.17 | 0.84  | 0 |
|     | 0.06     | 1 b1592 | 1.09 | 0.19 | 0     | 1.22 | 0.51  | 0 |
|     | 0.18     | 1       | 1.39 | 0.48 | 0     | 1.18 | 0.23  | 1 |
|     | 0.24     | 1       | 0.66 | 0.25 | 1     | 0.36 | 0.23  | 1 |
|     | 0.08     | 1 b0414 | 1.25 | 0.18 | 1     | 0.92 | 0.5   | 1 |
|     | 0.14     | 1 b4039 | 1.42 | 0.24 | 1     | 0.83 | 0.18  | 1 |
|     | 0.08     | 1 b0060 | 4.71 | 2.87 | 1     | 2.09 | 1.29  | 1 |
|     | 0.24     | 1 b3110 | 1.56 | 0.37 | 0     | 1.51 | 0.32  | 0 |
|     | 0.35     | 1 b3384 | 0.74 | 0.23 | 1     | 0.84 | 0.25  | 1 |
|     | 0.09     | 1       | 1.53 | 0.36 | 0     | 1.81 | 0.72  | 0 |
|     | 0.07     | 1       | 1.11 | 0.27 | 0     | 1.66 | 1.24  | 0 |
|     | 0.04     | 1 b0495 | 1.11 | 0.24 | 0     | 1.14 | 0.19  | 1 |
|     | 0.1      | 1 b0602 | 1.53 | 0.56 | 0     | 1.61 | 0.44  | 0 |
|     | 0.21     | 1 b2584 | 2.64 | 0.25 | 1     | 1.93 | 0.89  | 1 |
|     | 0.12     | 1       | 0.9  | 0.24 | 0     | 1.05 | 0.2   | 1 |
|     | 0.1      | 1 b3125 | 4.31 | 1.31 | 1     | 1.7  | 2.05  | 1 |
|     | 0.15     | 1 b3160 | 1.31 | 0.45 | 0     | 1.5  | 0.76  | 0 |
| n/a | n/a      |         | n/a  | n/a  | 0 n/a | n/a  |       | 0 |
|     | 0.05     | 1       | 1.93 | 0.69 | 0     | 1.45 | 10.76 | 0 |
|     | 0.04     | 1       | 1.83 | 0.92 | 0     | 2.57 | 1.14  | 0 |
|     | 0.11     | 1       | 1.3  | 2.05 | 0     | 1.33 | 0.55  | 0 |
|     | 0.04     | 1 b0522 | 1.25 | 0.55 | 0     | 1.36 | 0.31  | 0 |
| n/a | n/a      |         | n/a  | n/a  | 0 n/a | n/a  |       | 0 |
|     | 0.06     | 1       | 1.64 | 0.37 | 0     | 1.6  | 0.85  | 0 |
|     | 0.17     | 1 b3615 | 1.02 | 0.41 | 0     | 0.86 | 0.4   | 1 |
|     | 0.12     | 1 b2308 | 1.28 | 0.42 | 0     | 1.41 | 0.5   | 0 |
|     | 0.05     | 1       | 0.95 | 0.14 | 1     | 0.8  | 0.15  | 1 |
|     | 0.05     | 1 b1264 | 1.47 | 0.33 | 0     | 1.3  | 0.39  | 0 |
|     | 0.11     | 1 b2677 | 1.26 | 0.39 | 0     | 1.54 | 0.43  | 0 |
|     | 0.18     | 1       | 1.51 | 0.62 | 0     | 1.72 | 0.41  | 0 |
|     | 0.02     | 1 b0640 | 0.63 | 0.24 | 1     | 0.69 | 0.28  | 1 |
|     | 0.1      | 1 b2454 | 1.48 | 0.3  | 0     | 1.53 | 0.6   | 0 |
|     | 0.09     | 1 b3961 | 0.83 | 0.13 | 1     | 0.8  | 0.73  | 1 |
|     | 0.06     | 1 b0761 | 1.15 | 0.24 | 1     | 1.15 | 0.44  | 1 |
|     | 0.05     | 1       | 1.41 | 0.35 | 0     | 1.52 | 0.25  | 0 |
|     | 0.11     | 0 b2674 | 2.04 | 0.65 | 0     | 2.24 | 0.69  | 0 |
|     | 0.1      | 1 b1712 | 1.2  | 0.18 | 1     | 0.64 | 0.7   | 1 |
|     | 0.09     | 1 b3255 | 0.13 | 0.08 | 1     | 0.12 | 0.09  | 1 |
|     | 0.14     | 1       | 1.8  | 0.47 | 0     | 1.76 | 0.78  | 0 |
|     | 0.09     | 1       | 1.26 | 0.55 | 0     | 1.13 | 0.44  | 0 |
|     | 0.27 n/a |         | 1.69 | 0.5  | 0     | 2.4  | 0.5   | 0 |
|     | 0.11     | 0       | 1.98 | 0.88 | 0     | 1.32 | 0.69  | 1 |

|      |     |       |      |      |   |      |      |   |
|------|-----|-------|------|------|---|------|------|---|
| 0.12 | 1   | b3735 | 0.27 | 0.07 | 1 | 0.07 | 0.06 | 1 |
| 0.12 | 1   |       | 1.23 | 0.21 | 0 | 1.35 | 0.14 | 0 |
| 0.08 | 1   |       | 1.46 | 0.38 | 0 | 2.04 | 7.3  | 0 |
| 0.09 | 1   | b1876 | 0.21 | 0.14 | 1 | 0.23 | 0.16 | 1 |
| 0.1  | 1   | b3243 | 1.04 | 0.22 | 0 | 1.29 | 0.49 | 1 |
| 0.17 | 1   |       | 1.72 | 0.54 | 0 | 1.65 | 0.32 | 1 |
| 0.14 | 1   | b4142 | 0.91 | 0.27 | 1 | 0.45 | 0.17 | 1 |
| 0.07 | 1   |       | 1.74 | 0.65 | 0 | 1.55 | 0.63 | 0 |
| 0.14 | 1   | b3884 | 1.15 | 0.2  | 1 | 1.06 | 0.71 | 1 |
| 0.24 | 1   | b4000 | 0.79 | 0.19 | 1 | 0.38 | 0.48 | 1 |
| 0.22 | 1   |       | 1.27 | 0.74 | 0 | 1.69 | 0.21 | 0 |
| 0.06 | 1   |       | 1.5  | 0.24 | 0 | 1.95 | 0.85 | 0 |
| 0.1  | 1   | b4117 | 1.17 | 0.56 | 0 | 1.29 | 0.46 | 0 |
| 0.09 | 1   | b3764 | 0.39 | 0.05 | 1 | 0.28 | 0.1  | 1 |
| 0.09 | 0   |       | 1.63 | 0.25 | 0 | 2.07 | 0.71 | 0 |
| 0.04 | 1   |       | 1.56 | 0.64 | 1 | 1.3  | 0.35 | 1 |
| 0.05 | 1   | b4053 | 0.67 | 0.69 | 1 | 0.83 | 4.74 | 1 |
| 0.13 | 1   | b3203 | 1.79 | 0.14 | 1 | 0.85 | 0.29 | 1 |
| 0.06 | 1   |       | 1.38 | 0.35 | 0 | 1.76 | 0.34 | 0 |
| 0.04 | 1   | b3841 | 1.16 | 0.29 | 0 | 1.36 | 0.37 | 1 |
| 0.06 | 1   | b3823 | 1.31 | 0.54 | 0 | 1.22 | 0.38 | 0 |
| 0.08 | 1   |       | 1.15 | 0.3  | 0 | 1.66 | 0.77 | 0 |
| 0.07 | 1   |       | 1.15 | 0.25 | 0 | 2.17 | 0.78 | 0 |
| 0.06 | 1   | b0007 | 1.49 | 0.25 | 1 | 1.11 | 0.37 | 1 |
| 0.06 | 1   | b1081 | 1.07 | 0.2  | 0 | 1.22 | 0.41 | 1 |
| 0.09 | 1   | b1938 | 1.16 | 0.53 | 0 | 1.44 | 0.4  | 0 |
| 0.1  | 1   |       | 1.35 | 0.24 | 0 | 1.58 | 1.62 | 0 |
| 0.12 | 1   | b2826 | 1.48 | 0.27 | 0 | 1.14 | 0.44 | 0 |
| 0.1  | 1   | b2845 | 1.1  | 0.28 | 0 | 1.19 | 0.48 | 1 |
| 0.07 | 1   | b3929 | 1.42 | 0.09 | 1 | 1.4  | 5.25 | 1 |
| 0.11 | 1   | b3835 | 0.77 | 0.21 | 1 | 0.67 | 0.39 | 1 |
| 0.07 | 1   |       | 1.74 | 0.27 | 0 | 1.88 | 0.58 | 0 |
| 0.05 | 1   |       | 1.27 | 0.38 | 0 | 1.12 | 0.43 | 0 |
| 0.06 | 1   | b1479 | 0.49 | 0.07 | 1 | 0.43 | 0.17 | 1 |
| 0.11 | 1   | b1180 | 0.74 | 0.24 | 1 | 0.88 | 0.77 | 1 |
| 0.06 | 1   | b1828 | 1    | 0.16 | 0 | 1.07 | 0.26 | 1 |
| 0.04 | 1   | b1853 | 1.04 | 0.13 | 1 | 1.08 | 0.3  | 1 |
| 0.09 | 1   | b1867 | 0.76 | 0.2  | 0 | 1.08 | 0.37 | 1 |
| 0.07 | 1   | b0494 | 0.68 | 0.11 | 1 | 0.56 | 0.28 | 1 |
| 0.05 | 1   | b0519 | 1.45 | 0.63 | 0 | 1.48 | 0.36 | 0 |
| n/a  | n/a |       | n/a  | n/a  | 0 | n/a  | n/a  | 0 |
| 0.07 | 1   | b1412 | 2.82 | 0.71 | 1 | 1.93 | 0.34 | 1 |
| 0.05 | 1   |       | 1.39 | 0.68 | 0 | 1.61 | 2.35 | 0 |
| 0.06 | 1   | b1267 | 1.43 | 0.17 | 1 | 1.27 | 0.48 | 1 |
| 0.07 | 1   | b1222 | 1.39 | 0.43 | 0 | 0.9  | 0.21 | 1 |
| 0.05 | 1   | b1187 | 1.12 | 0.63 | 1 | 0.85 | 0.36 | 1 |
| 0.07 | 1   | b1835 | 0.6  | 0.3  | 1 | 0.89 | 0.25 | 1 |
| 0.06 | 1   |       | 1.1  | 0.73 | 0 | 1.47 | 0.46 | 0 |
| 0.13 | 0   | b0467 | 1.61 | 0.26 | 0 | 1.6  | 0.59 | 0 |
| 0.07 | 1   |       | 1.29 | 0.24 | 0 | 1.43 | 0.34 | 0 |
| 0.07 | 1   |       | 1.5  | 0.49 | 0 | 1.91 | 0.5  | 0 |
| 0.09 | 1   | b4352 | 0.74 | 0.14 | 1 | 0.47 | 0.27 | 1 |

|     |         |         |      |      |       |      |      |   |
|-----|---------|---------|------|------|-------|------|------|---|
|     | 0.05    | 1 b0393 | 0.68 | 0.19 | 1     | 0.61 | 0.34 | 1 |
|     | 0.06    | 1       | 1.36 | 0.69 | 0     | 1.28 | 0.21 | 0 |
|     | 0.11    | 1       | 1.15 | 0.27 | 0     | 1.1  | 0.42 | 1 |
|     | 0.07    | 1       | 0.93 | 0.3  | 1     | 1.1  | 0.16 | 1 |
|     | 0.06    | 1 b3010 | 1.09 | 0.17 | 1     | 1.08 | 0.34 | 1 |
| n/a | n/a     |         | n/a  | n/a  | 0 n/a | n/a  |      | 0 |
|     | 0.13    | 1       | 1.57 | 0.42 | 0     | 1.3  | 1.32 | 1 |
|     | 0.07    | 1 b2595 | 0.48 | 0.24 | 1     | 0.78 | 0.3  | 1 |
|     | 0.1 n/a |         | 1.47 | 0.56 | 0     | 1.62 | 1.87 | 0 |
|     | 0.1     | 1 b2685 | 0.61 | 0.24 | 1     | 0.79 | 0.33 | 1 |
|     | 0.06    | 1       | 1.52 | 0.26 | 0     | 1.71 | 0.78 | 0 |
|     | 0.11    | 1 b3570 | 0.69 | 0.27 | 1     | 0.64 | 0.79 | 1 |
|     | 0.12    | 1 b3633 | 0.57 | 0.4  | 0     | 0.68 | 0.51 | 1 |
|     | 0.06    | 1 b2797 | 0.48 | 0.07 | 1     | 0.44 | 0.21 | 1 |
|     | 0.12    | 1 b2823 | 1.42 | 0.24 | 0     | 1.53 | 0.21 | 0 |
|     | 0.07    | 1 b2147 | 1.05 | 0.16 | 0     | 1.28 | 0.31 | 1 |
|     | 0.03    | 1 b2184 | 0.97 | 0.17 | 0     | 1.09 | 0.37 | 1 |
|     | 0.09    | 1 b2193 | 0.85 | 0.22 | 0     | 1.28 | 0.31 | 1 |
|     | 0.06    | 1 b1807 | 0.87 | 0.09 | 0     | 1.17 | 0.61 | 1 |
|     | 0.15    | 1 b3306 | 0.31 | 0.1  | 1     | 0.08 | 0.05 | 1 |
|     | 0.08    | 0 b0881 | 6.89 | 1.57 | 1     | 2.85 | 1.09 | 1 |
|     | 0.03    | 1 b0871 | 1.24 | 0.15 | 0     | 1.42 | 1.02 | 1 |
|     | 0.14    | 1 b3317 | 0.31 | 0.07 | 1     | 0.09 | 0.06 | 1 |
|     | 0.07    | 1 b4156 | 0.87 | 0.25 | 0     | 1.17 | 0.35 | 1 |
|     | 0.08    | 1 b4200 | 0.39 | 0.08 | 1     | 0.11 | 0.51 | 1 |
|     | 0.04    | 1 b3053 | 1.07 | 0.2  | 1     | 0.76 | 0.27 | 1 |
|     | 0.11    | 1       | 2.11 | 0.44 | 0     | 1.61 | 0.61 | 0 |
|     | 0.07    | 1       | 0.56 | 0.18 | 1     | 0.87 | 1.02 | 1 |
|     | 0.09    | 1       | 0.99 | 0.17 | 1     | 0.92 | 0.22 | 1 |
|     | 0.08    | 1       | 1.74 | 0.19 | 1     | 0.71 | 0.66 | 1 |
|     | 0.05    | 1 b0376 | 0.96 | 0.5  | 0     | 1.07 | 0.24 | 1 |
|     | 0.07    | 1 b2100 | 1.45 | 0.62 | 0     | 1.12 | 0.36 | 0 |
|     | 0.02    | 1 b2180 | 1.66 | 0.29 | 1     | 1.43 | 0.74 | 1 |
|     | 0.08    | 0 b2187 | 0.94 | 0.11 | 0     | 1.16 | 0.8  | 1 |
|     | 0.04    | 1 b2055 | 1.22 | 0.42 | 0     | 1.57 | 0.42 | 0 |
|     | 0.07    | 0 b2135 | 1.66 | 0.45 | 0     | 1.84 | 0.56 | 0 |
|     | 0.1     | 1 b3601 | 1.33 | 0.21 | 0     | 1.54 | 0.55 | 0 |
|     | 0.11    | 1 b3522 | 1.07 | 0.2  | 0     | 1.52 | 0.33 | 0 |
|     | 0.14    | 1 b3414 | 0.94 | 0.2  | 1     | 0.43 | 0.16 | 1 |
|     | 0.09    | 1 b3106 | 1.51 | 0.34 | 1     | 1.6  | 0.41 | 1 |
|     | 0.09    | 1 b1855 | 0.53 | 0.1  | 1     | 0.55 | 0.12 | 1 |
|     | 0.05    | 1       | 1.34 | 0.54 | 0     | 1.72 | 0.38 | 0 |
|     | 0.06    | 1       | 1.73 | 0.45 | 0     | 1.39 | 0.23 | 0 |
|     | 0.04    | 0 b0791 | 2.41 | 0.7  | 0     | 1.98 | 1.58 | 0 |
| n/a | n/a     |         | n/a  | n/a  | 0 n/a | n/a  |      | 0 |
|     | 0.07    | 1 b0949 | 0.54 | 0.37 | 1     | 0.55 | 0.66 | 1 |
| n/a | n/a     |         | n/a  | n/a  | 0 n/a | n/a  |      | 0 |
|     | 0.04    | 1 b0786 | 1.71 | 0.23 | 1     | 1.45 | 0.18 | 0 |
| n/a | n/a     |         | n/a  | n/a  | 0 n/a | n/a  |      | 0 |
|     | 0.05    | 1       | 1.63 | 0.3  | 0     | 1.8  | 0.16 | 0 |
|     | 0.11    | 1 b3099 | 0.79 | 0.18 | 1     | 1.04 | 0.55 | 1 |
|     | 0.07    | 1 b4192 | 1.33 | 0.23 | 0     | 1.37 | 0.46 | 0 |

|     |      |     |       |      |      |     |      |      |   |
|-----|------|-----|-------|------|------|-----|------|------|---|
| n/a | n/a  |     | n/a   | n/a  | 0    | n/a | n/a  | 0    |   |
|     | 0.11 | 1   |       | 1.58 | 0.45 | 0   | 1.24 | 0.58 | 0 |
|     | 0.09 | 1   | b0380 | 1.43 | 0.25 | 0   | 1.25 | 0.74 | 0 |
|     | 0.11 | 1   | b2343 | 0.89 | 0.12 | 1   | 1.22 | 0.52 | 1 |
|     | 0.17 | 0   | b3362 | 1.14 | 0.26 | 0   | 0.96 | 0.78 | 1 |
|     | 0.09 | 1   |       | 1.27 | 0.25 | 0   | 1.29 | 0.61 | 0 |
|     | 0.06 | 1   |       | 1.24 | 0.35 | 0   | 1.32 | 1.99 | 0 |
|     | 0.1  | 1   | b4202 | 0.38 | 0.11 | 1   | 0.15 | 0.06 | 1 |
|     | 0.14 | 1   | b3312 | 0.32 | 0.1  | 1   | 0.19 | 0.17 | 1 |
|     | 0.12 | 1   |       | 1.15 | 0.31 | 0   | 1.5  | 0.47 | 0 |
|     | 0.04 | 1   |       | 1.19 | 0.34 | 0   | 2.27 | 0.63 | 0 |
|     | 0.07 | 1   | b2947 | 0.64 | 0.16 | 1   | 0.69 | 0.48 | 1 |
|     | 0.16 | 1   |       | 0.81 | 0.11 | 1   | 1.49 | 0.37 | 0 |
|     | 0.06 | 1   |       | 1.4  | 0.18 | 0   | 1.57 | 0.36 | 0 |
| n/a | n/a  |     | n/a   | n/a  | 0    | n/a | n/a  | 0    |   |
| n/a | n/a  |     | n/a   | n/a  | 0    | n/a | n/a  | 0    |   |
|     | 0.06 | 1   | b3354 | 0.92 | 0.13 | 0   | 1.27 | 0.38 | 0 |
|     | 0.06 | 1   |       | 1.02 | 0.19 | 1   | 0.58 | 1.59 | 1 |
|     | 0.06 | 1   |       | 1.57 | 0.35 | 0   | 1.67 | 0.76 | 0 |
|     | 0.05 | 1   | b1778 | 0.64 | 0.16 | 1   | 0.21 | 0.05 | 1 |
|     | 0.02 | 1   | b1768 | 0.77 | 0.06 | 1   | 0.99 | 0.49 | 1 |
|     | 0.1  | 1   | b4373 | 0.59 | 0.18 | 1   | 1.02 | 0.32 | 1 |
|     | 0.07 | 1   | b3753 | 1.31 | 0.42 | 1   | 0.98 | 0.33 | 1 |
|     | 0.11 | 1   | b1839 | 0.93 | 0.15 | 1   | 1.04 | 0.94 | 1 |
|     | 0.3  | 0   |       | 1.66 | 0.76 | 0   | 1.51 | 0.18 | 0 |
|     | 0.31 | 0   |       | 1.6  | 0.68 | 0   | 1.87 | 0.69 | 0 |
|     | 0.11 | 0   |       | 1.25 | 0.49 | 0   | 1.56 | 0.87 | 0 |
|     | 0.09 | 0   |       | 1.72 | 0.2  | 0   | 1.6  | 0.82 | 0 |
|     | 0.13 | 1   |       | 1.5  | 0.29 | 0   | 1.27 | 0.25 | 1 |
| n/a | n/a  |     | n/a   | n/a  | 0    | n/a | n/a  | 0    |   |
| n/a | n/a  |     | n/a   | n/a  | 0    | n/a | n/a  | 0    |   |
| n/a | n/a  |     | n/a   | n/a  | 0    | n/a | n/a  | 0    |   |
| n/a | n/a  |     | n/a   | n/a  | 0    | n/a | n/a  | 0    |   |
| n/a | n/a  |     | n/a   | n/a  | 0    | n/a | n/a  | 0    |   |
| n/a | n/a  |     | n/a   | n/a  | 0    | n/a | n/a  | 0    |   |
| n/a | n/a  |     | n/a   | n/a  | 0    | n/a | n/a  | 0    |   |
| n/a | n/a  |     | n/a   | n/a  | 0    | n/a | n/a  | 0    |   |
| n/a | n/a  |     | n/a   | n/a  | 0    | n/a | n/a  | 0    |   |
| n/a | n/a  |     | n/a   | n/a  | 0    | n/a | n/a  | 0    |   |
| n/a | n/a  |     | n/a   | n/a  | 0    | n/a | n/a  | 0    |   |
|     | 0.06 | n/a | b4130 | 3.37 | 0.51 | 1   | 1.16 | 0.25 | 1 |
|     | 0.07 | 1   | b0693 | 1.39 | 0.29 | 0   | 1.41 | 0.35 | 1 |
| n/a | n/a  |     | n/a   | n/a  | 0    | n/a | n/a  | 0    |   |
|     | 0.1  | n/a | b0809 | 0.5  | 0.15 | 1   | 0.44 | 0.09 | 1 |
| n/a | n/a  |     | n/a   | n/a  | 0    | n/a | n/a  | 0    |   |
|     | 0.07 | n/a |       | 0.57 | 0.14 | 1   | 0.78 | 0.16 | 1 |
|     | 0.03 | 1   |       | 1.71 | 0.67 | 0   | 1.5  | 0.44 | 0 |
|     | 0.1  | 1   |       | 1.15 | 0.3  | 0   | 1.51 | 0.36 | 0 |
|     | 0.14 | 1   |       | 1.26 | 0.23 | 0   | 1.43 | 0.2  | 0 |
|     | 0.13 | n/a |       | 1.68 | 0.27 | 0   | 1.92 | 0.4  | 0 |
|     | 0.05 | n/a |       | 1.06 | 0.2  | 1   | 1.29 | 0.52 | 1 |

|      |     |       |      |      |   |      |      |   |
|------|-----|-------|------|------|---|------|------|---|
| 0.1  | 1   |       | 1.99 | 0.29 | 1 | 1.16 | 0.33 | 1 |
| 0.08 | 1   |       | 1.55 | 0.79 | 0 | 1.43 | 0.56 | 0 |
| 0.08 | 1   |       | 1.74 | 0.6  | 0 | 1.34 | 0.34 | 0 |
| 0.06 | n/a | b2468 | 1.01 | 0.94 | 0 | 1.25 | 0.32 | 1 |
| 0.13 | n/a |       | 1.02 | 0.17 | 0 | 1.17 | 0.16 | 1 |
| 0.07 | 1   |       | 0.81 | 0.1  | 1 | 0.83 | 0.32 | 1 |
| 0.06 | 1   |       | 1.37 | 0.41 | 0 | 1.08 | 0.39 | 1 |
| 0.25 | 0   |       | 1.46 | 1.08 | 0 | 1.6  | 1.23 | 0 |
| 0.06 | 1   |       | 1.54 | 0.39 | 0 | 1.52 | 0.67 | 1 |
| 0.12 | 1   |       | 1    | 0.32 | 1 | 0.93 | 1.11 | 1 |
| 0.07 | 1   |       | 1.47 | 0.3  | 0 | 1.06 | 0.42 | 1 |
| 0.06 | 1   |       | 1.24 | 0.57 | 0 | 1.35 | 0.74 | 0 |
| 0.04 | 1   |       | 1.51 | 0.4  | 0 | 1.27 | 0.53 | 0 |
| 0.07 | 1   |       | 1.75 | 0.53 | 0 | 1.38 | 0.34 | 0 |
| 0.07 | 1   |       | 1.43 | 0.28 | 1 | 1.39 | 1.04 | 1 |
| 0.07 | n/a |       | 1.42 | 0.86 | 0 | 1.27 | 0.4  | 0 |
| 0.04 | 1   |       | 1.29 | 0.1  | 0 | 1.8  | 0.58 | 0 |
| 0.04 | 1   |       | 1.19 | 0.35 | 0 | 1.67 | 0.61 | 0 |
| 0.09 | 1   |       | 1.83 | 0.67 | 0 | 2.05 | 0.99 | 0 |
| 0.09 | n/a |       | 1.39 | 0.37 | 0 | 1.32 | 0.46 | 0 |
| 0.04 | 1   |       | 1.36 | 0.12 | 0 | 1.2  | 0.58 | 1 |
| 0.06 | 1   |       | 1.72 | 0.36 | 0 | 1.79 | 0.27 | 0 |
| 0.1  | 1   |       | 1.68 | 0.49 | 0 | 1.39 | 0.53 | 0 |
| 0.02 | 1   |       | 1.49 | 0.26 | 0 | 1.58 | 0.42 | 0 |
| 0.15 | 1   |       | 1.36 | 0.28 | 0 | 1.19 | 0.58 | 0 |
| 0.14 | 1   |       | 1.08 | 0.51 | 0 | 1.62 | 0.93 | 0 |
| 0.07 | n/a |       | 1.26 | 0.27 | 0 | 1.63 | 1.34 | 0 |
| 0.07 | 1   |       | 2.09 | 0.3  | 1 | 1.33 | 0.63 | 1 |
| 0.06 | 1   |       | 1.43 | 0.29 | 0 | 1.63 | 0.62 | 0 |
| 0.09 | 1   |       | 1.5  | 0.38 | 0 | 1.15 | 0.74 | 0 |
| 0.08 | 1   |       | 1.53 | 0.25 | 0 | 1.69 | 0.91 | 0 |
| 0.13 | 1   | b0131 | 0.56 | 0.25 | 1 | 0.73 | 0.25 | 1 |
| 0.05 | 1   | b0196 | 0.64 | 0.29 | 0 | 0.55 | 0.22 | 1 |
| 0.05 | n/a |       | 1.12 | 0.33 | 0 | 0.86 | 0.45 | 1 |
| 0.05 | 1   | b1270 | 1.2  | 0.34 | 0 | 1.2  | 0.45 | 1 |
| 0.16 | 1   | b3726 | 1.31 | 0.29 | 0 | 1.26 | 0.48 | 0 |
| 0.08 | 1   | b3754 | 1.46 | 0.34 | 0 | 1.41 | 0.63 | 1 |
| 0.6  | 1   | b4390 | 1.45 | 0.46 | 0 | 0.96 | 0.21 | 1 |
| 0.06 | 1   |       | 1.38 | 0.2  | 0 | 1.85 | 1.15 | 0 |
| 0.08 | 1   | b3342 | 0.13 | 0.25 | 1 | 0.1  | 0.05 | 1 |
| 0.05 | 1   | b2436 | 0.97 | 0.15 | 0 | 1.4  | 0.28 | 0 |
| 0.13 | 1   | b3201 | 1.02 | 0.26 | 1 | 0.96 | 0.33 | 1 |
| 0.07 | 1   |       | 0.93 | 0.43 | 0 | 0.95 | 0.22 | 1 |
| 0.1  | n/a | b0097 | 0.56 | 0.51 | 1 | 0.93 | 0.33 | 1 |
| 0.06 | 1   | b0123 | 1.86 | 0.23 | 1 | 1.07 | 0.33 | 1 |
| 0.07 | 1   | b0146 | 0.91 | 0.21 | 0 | 0.94 | 0.13 | 1 |
| 0.08 | 1   | b0176 | 0.79 | 0.25 | 1 | 0.76 | 0.2  | 1 |
| 0.08 | 1   | b1543 | 1.33 | 0.27 | 0 | 1.93 | 0.9  | 0 |
| 0.06 | 1   |       | 0.86 | 0.28 | 0 | 1.18 | 0.44 | 0 |
| n/a  | n/a |       | n/a  | n/a  | 0 | n/a  | n/a  | 0 |
| 0.07 | n/a | b0693 | 1.75 | 0.23 | 0 | 1.26 | 0.7  | 0 |
| n/a  | n/a |       | n/a  | n/a  | 0 | n/a  | n/a  | 0 |

|     |          |         |     |      |      |   |      |      |   |
|-----|----------|---------|-----|------|------|---|------|------|---|
|     | 0.09     | 0       |     | 1.57 | 0.34 | 0 | 1.79 | 1.54 | 0 |
| n/a | n/a      |         | n/a | n/a  |      | 0 | n/a  | n/a  | 0 |
| n/a | n/a      |         | n/a | n/a  |      | 0 | n/a  | n/a  | 0 |
|     | 0.08     | 1 b4388 |     | 0.79 | 5.13 | 0 | 0.86 | 0.25 | 1 |
|     | 0.06     | 1       |     | 0.26 | 0.61 | 1 | 0.1  | 0.03 | 1 |
|     | 0.04     | 1 b0222 |     | 0.95 | 1.22 | 1 | 0.75 | 0.24 | 1 |
| n/a | n/a      |         | n/a | n/a  |      | 0 | n/a  | n/a  | 0 |
|     | 0.08     | 1 b0959 |     | 1.94 | 0.72 | 0 | 1.4  | 0.84 | 0 |
|     | 0.08     | 1       |     | 1.41 | 0.38 | 0 | 1.77 | 0.63 | 1 |
| n/a | n/a      |         | n/a | n/a  |      | 0 | n/a  | n/a  | 0 |
|     | 0.05     | 1 b0946 |     | 0.85 | 0.36 | 0 | 1.53 | 0.37 | 0 |
|     | 0.18     | 1 b1631 |     | 1.13 | 0.43 | 0 | 1.28 | 0.45 | 1 |
|     | 0.08     | 1 b1035 |     | 0.87 | 0.26 | 0 | 1.35 | 0.34 | 0 |
|     | 0.06     | 1 b1087 |     | 0.76 | 0.19 | 0 | 0.83 | 0.24 | 1 |
|     | 0.08 n/a | b1113   |     | 0.89 | 0.45 | 0 | 0.91 | 0.36 | 1 |
|     | 0.08     | 1 b1627 |     | 0.96 | 0.39 | 0 | 1.27 | 0.4  | 0 |
|     | 0.1      | 1 b3304 |     | 0.38 | 0.12 | 1 | 0.17 | 0.15 | 1 |
|     | 0.09     | 1 b3359 |     | 1.13 | 0.18 | 0 | 1.2  | 0.88 | 1 |
|     | 0.19     | 1 b3408 |     | 1.85 | 0.56 | 1 | 1.66 | 0.62 | 0 |
| n/a | n/a      |         | n/a | n/a  |      | 0 | n/a  | n/a  | 0 |
| n/a | n/a      |         | n/a | n/a  |      | 0 | n/a  | n/a  | 0 |
|     | 0.03     | 1 b0922 |     | 0.82 | 0.42 | 0 | 0.84 | 0.46 | 1 |
|     | 0.11     | 1       |     | 1.84 | 0.5  | 0 | 1.43 | 0.45 | 0 |
|     | 0.1      | 1       |     | 1.72 | 0.6  | 0 | 1.54 | 0.11 | 1 |
|     | 0.2      | 0 b3964 |     | 1.39 | 0.46 | 0 | 1.43 | 0.4  | 0 |
|     | 0.12     | 1       |     | 1.44 | 0.42 | 0 | 1.61 | 0.45 | 1 |
| n/a | n/a      |         | n/a | n/a  |      | 0 | n/a  | n/a  | 0 |
|     | 0.09     | 1 b3954 |     | 1.11 | 0.28 | 0 | 1.14 | 0.22 | 1 |
| n/a | n/a      |         | n/a | n/a  |      | 0 | n/a  | n/a  | 0 |
|     | 0.17     | 1       |     | 1.4  | 0.37 | 0 | 1.49 | 0.42 | 0 |
|     | 0.08     | 1 b2346 |     | 0.61 | 0.14 | 1 | 0.72 | 0.16 | 1 |
| n/a | n/a      |         | n/a | n/a  |      | 0 | n/a  | n/a  | 0 |
|     | 0.1      | 1 b2493 |     | 1.15 | 0.21 | 0 | 1.68 | 0.5  | 0 |
|     | 0.12     | 1 b4016 |     | 0.46 | 0.47 | 0 | 0.47 | 0.24 | 1 |
|     | 0.09     | 1 b3939 |     | 1.2  | 0.24 | 0 | 1.02 | 0.21 | 1 |
|     | 0.25     | 1 b3957 |     | 1.35 | 0.29 | 0 | 1.36 | 0.22 | 1 |
|     | 0.1 n/a  | b2742   |     | 0.99 | 0.29 | 1 | 0.58 | 0.24 | 1 |
|     | 0.11     | 1 b2326 |     | 1.21 | 0.26 | 0 | 1.32 | 0.34 | 0 |
|     | 0.05     | 1 b2426 |     | 0.91 | 0.15 | 1 | 0.56 | 0.12 | 1 |
|     | 0.05     | 1       |     | 1.07 | 0.35 | 0 | 1.1  | 0.38 | 1 |
|     | 0.07     | 1       |     | 1.4  | 0.43 | 0 | 1.35 | 0.44 | 0 |
|     | 0.08     | 0 b1759 |     | 2.23 | 0.49 | 0 | 1.51 | 1.03 | 0 |
|     | 0.19     | 1 b4162 |     | 1.26 | 0.36 | 0 | 1.55 | 0.49 | 0 |
|     | 0.11     | 1 b4196 |     | 1.8  | 0.31 | 0 | 1.4  | 1.05 | 0 |
| n/a | n/a      |         | n/a | n/a  |      | 0 | n/a  | n/a  | 0 |
|     | 0.16     | 0 b2207 |     | 1.75 | 0.64 | 0 | 1.5  | 0.84 | 0 |
| n/a | n/a      |         | n/a | n/a  |      | 0 | n/a  | n/a  | 0 |
|     | 0.1      | 1       |     | 2.23 | 0.49 | 1 | 0.98 | 0.49 | 1 |
|     | 0.18     | 1 b4355 |     | 1.24 | 0.33 | 0 | 1.14 | 0.41 | 0 |
|     | 0.06 n/a |         |     | 1.09 | 0.08 | 0 | 0.94 | 0.42 | 1 |
|     | 0.08     | 1 b1646 |     | 1.58 | 0.45 | 0 | 2.41 | 1.22 | 0 |
|     | 0.04 n/a | b1046   |     | 1.42 | 0.2  | 0 | 1.31 | 0.44 | 1 |

|      |         |      |      |   |      |      |   |
|------|---------|------|------|---|------|------|---|
| 0.11 | 1       | 1.02 | 0.26 | 0 | 1.16 | 0.46 | 1 |
| 0.11 | 1 b2461 | 1.49 | 0.38 | 0 | 1.48 | 0.42 | 0 |
| 0.03 | 1 b1124 | 0.66 | 0.25 | 0 | 0.73 | 1.17 | 1 |
| 0.05 | 1 b1723 | 1.82 | 0.84 | 1 | 1.28 | 0.67 | 1 |
| 0.15 | 0 b4181 | 1.29 | 2.16 | 0 | 1.65 | 0.66 | 0 |
| 0.06 | 1 b1126 | 1.02 | 0.41 | 0 | 1.16 | 0.42 | 0 |
| 0.05 | 1       | 1.74 | 0.66 | 0 | 1.42 | 0.57 | 0 |
| 0.04 | 1 b1764 | 0.97 | 0.17 | 1 | 1.09 | 0.36 | 1 |
| 0.18 | 0 b1717 | 0.89 | 0.46 | 1 | 0.9  | 0.42 | 1 |
| 0.08 | 1 b1659 | 1.8  | 0.35 | 0 | 1.89 | 0.72 | 0 |
| 0.07 | 1 b3454 | 1.97 | 1.26 | 0 | 1.09 | 2.53 | 0 |
| 0.11 | 1 b0073 | 1.16 | 0.24 | 0 | 1.16 | 0.33 | 1 |
| 0.08 | 1       | 1.65 | 0.48 | 0 | 1.44 | 0.23 | 1 |
| 0.1  | 1 b4036 | 1.16 | 0.14 | 0 | 1.18 | 0.41 | 1 |
| 0.12 | 1 b3750 | 1.37 | 0.53 | 0 | 1    | 0.51 | 1 |
| 0.03 | 1 b0155 | 0.97 | 0.6  | 0 | 1.13 | 0.43 | 1 |
| 0.06 | 1       | 0.5  | 0.16 | 1 | 0.46 | 0.24 | 1 |
| 0.08 | 1 b0404 | 1.59 | 0.3  | 0 | 1.09 | 0.32 | 1 |
| 0.07 | 1       | 1.44 | 0.45 | 0 | 1.31 | 0.5  | 1 |
| 0.08 | 1 b2322 | 1.48 | 0.34 | 0 | 1.67 | 0.45 | 0 |
| 0.07 | 1 b1725 | 3.65 | 1.16 | 1 | 1.57 | 0.55 | 1 |
| n/a  | n/a     | n/a  | n/a  | 0 | n/a  | n/a  | 0 |
| 0.04 | 1       | 1.52 | 0.35 | 0 | 1.12 | 0.38 | 1 |
| 0.06 | 1 b2027 | 0.71 | 0.62 | 1 | 0.48 | 0.18 | 1 |
| 0.03 | 1 b3714 | 1.07 | 0.33 | 0 | 1.17 | 0.24 | 0 |
| 0.08 | 1 b0174 | 0.84 | 0.74 | 1 | 0.93 | 0.61 | 1 |
| 0.04 | 1 b2008 | 2.02 | 0.24 | 1 | 1.72 | 0.75 | 1 |
| 0.08 | 1 b0087 | 0.8  | 0.19 | 1 | 1.06 | 0.18 | 1 |
| 0.06 | 1 b2312 | 0.55 | 0.25 | 1 | 0.62 | 0.49 | 1 |
| 0.08 | 1 b3461 | 2.47 | 0.34 | 1 | 1.72 | 1.27 | 1 |
| 0.08 | 1 b3164 | 0.32 | 0.08 | 1 | 0.25 | 0.15 | 1 |
| 0.09 | 1 b2536 | 1.16 | 1.34 | 0 | 1.36 | 0.64 | 0 |
| n/a  | n/a     | n/a  | n/a  | 0 | n/a  | n/a  | 0 |
| 0.04 | 1 b0179 | 0.75 | 0.09 | 1 | 0.37 | 0.16 | 1 |
| n/a  | n/a     | n/a  | n/a  | 0 | n/a  | n/a  | 0 |
| 0.14 | 1       | 1.03 | 0.32 | 0 | 1.03 | 1.95 | 0 |
| 0.1  | 1       | 1.53 | 0.29 | 1 | 1.14 | 0.2  | 1 |
| 0.18 | 1 b3449 | 1.34 | 0.97 | 0 | 1.29 | 0.58 | 0 |
| 0.18 | 1 b3650 | 0.48 | 0.28 | 1 | 0.42 | 0.22 | 1 |
| 0.05 | 1       | 1.09 | 0.27 | 0 | 1.57 | 0.65 | 0 |
| 0.12 | 1       | 1.39 | 0.37 | 0 | 1.29 | 0.37 | 0 |
| 0.12 | 0 b2419 | 1.84 | 0.45 | 0 | 1.95 | 0.49 | 0 |
| 0.09 | 1 b0811 | 0.84 | 0.13 | 1 | 0.69 | 0.08 | 1 |
| 0.05 | 1 b0581 | 1.75 | 0.62 | 0 | 1.15 | 0.54 | 0 |
| 0.05 | 1       | 1.27 | 0.17 | 1 | 0.99 | 0.37 | 1 |
| 0.07 | 1 b2576 | 1.02 | 0.18 | 0 | 1.24 | 0.32 | 1 |
| 0.12 | 1 b3041 | 0.33 | 0.15 | 1 | 0.5  | 0.15 | 1 |
| 0.05 | 1 b4054 | 0.7  | 0.06 | 1 | 0.7  | 0.29 | 1 |
| 0.06 | 1       | 1.82 | 0.44 | 0 | 1.24 | 0.41 | 1 |
| 0.09 | 1 b2019 | 1.06 | 0.45 | 0 | 1.49 | 0.56 | 1 |
| 0.12 | 1 b0535 | 1.6  | 0.28 | 1 | 0.81 | 0.33 | 1 |
| 0.16 | 1 b3885 | 1.6  | 0.52 | 0 | 1.28 | 0.57 | 0 |



|     |          |         |      |      |       |      |      |   |
|-----|----------|---------|------|------|-------|------|------|---|
|     | 0.13     | 1 b0857 | 1.36 | 0.32 | 0     | 1.43 | 0.49 | 0 |
|     | 0.05     | 1 b0708 | 1.45 | 0.43 | 0     | 1.42 | 1.28 | 1 |
|     | 0.18     | 1       | 1.33 | 0.31 | 0     | 1.52 | 0.4  | 0 |
|     | 0.12     | 1 b0675 | 1.17 | 0.31 | 0     | 1.44 | 0.52 | 0 |
|     | 0.09     | 1 b0714 | 1.1  | 0.23 | 0     | 1.73 | 1.02 | 0 |
|     | 0.15     | 1 b3941 | 3.04 | 1.35 | 1     | 2.65 | 0.69 | 1 |
|     | 0.08     | 1 b4063 | 2.28 | 0.61 | 0     | 1.63 | 0.67 | 0 |
|     | 0.12 n/a |         | 1.43 | 0.3  | 0     | 1.45 | 6.55 | 0 |
|     | 0.08     | 1 b2552 | 0.9  | 0.25 | 0     | 0.9  | 0.36 | 1 |
|     | 0.19     | 0       | 1.53 | 0.37 | 0     | 1.81 | 0.81 | 0 |
|     | 0.09     | 1 b3994 | 1.45 | 0.38 | 0     | 1.26 | 0.64 | 1 |
|     | 0.07     | 1 b3882 | 1.23 | 0.24 | 0     | 1.14 | 0.42 | 1 |
| n/a | n/a      |         | n/a  | n/a  | 0 n/a | n/a  |      | 0 |
|     | 0.08     | 1       | 1.44 | 0.31 | 0     | 1.87 | 0.91 | 0 |
|     | 0.06     | 1 b1090 | 0.61 | 0.1  | 1     | 0.6  | 0.5  | 1 |
|     | 0.07     | 1 b1286 | 0.36 | 0.51 | 1     | 0.75 | 0.55 | 1 |
|     | 0.08     | 1 b2594 | 0.91 | 0.04 | 1     | 1.03 | 0.25 | 1 |
|     | 0.06     | 1 b0029 | 1.14 | 0.23 | 0     | 1.26 | 0.51 | 0 |
|     | 0.22     | 0       | 1.51 | 0.26 | 0     | 1.49 | 0.24 | 0 |
|     | 0.12     | 1       | 2.15 | 0.36 | 0     | 1.27 | 0.32 | 1 |
|     | 0.05     | 1       | 1.88 | 0.76 | 0     | 1.54 | 0.49 | 0 |
|     | 0.03     | 1 b1258 | 1.79 | 0.25 | 0     | 1.78 | 0.57 | 1 |
| n/a | n/a      |         | n/a  | n/a  | 0 n/a | n/a  |      | 0 |
|     | 0.05     | 1 b0418 | 1.25 | 0.14 | 0     | 1.5  | 1.65 | 0 |
|     | 0.07     | 1 b1335 | 1.39 | 0.52 | 0     | 1.54 | 5.94 | 0 |
|     | 0.07     | 1       | 1.4  | 0.33 | 0     | 1.37 | 0.28 | 0 |
|     | 0.06     | 1 b1813 | 0.67 | 0.24 | 0     | 1.35 | 0.45 | 1 |
|     | 0.05     | 1 b1221 | 1.04 | 0.17 | 1     | 0.63 | 0.19 | 1 |
|     | 0.13     | 1 b2821 | 1.42 | 0.35 | 0     | 1.42 | 0.23 | 0 |
|     | 0.09     | 1 b2747 | 0.57 | 0.19 | 1     | 0.77 | 0.68 | 1 |
|     | 0.08     | 1 b2735 | 1.31 | 0.2  | 0     | 1.28 | 0.66 | 0 |
|     | 0.05     | 1       | 1.23 | 0.37 | 0     | 1.56 | 0.75 | 0 |
|     | 0.06     | 1 b0049 | 0.61 | 0.12 | 1     | 0.73 | 0.22 | 1 |
|     | 0.08     | 1 b3795 | 0.79 | 0.42 | 0     | 1.71 | 0.87 | 1 |
|     | 0.15     | 1 b3779 | 0.42 | 0.27 | 1     | 0.69 | 0.3  | 1 |
|     | 0.11     | 1 b3985 | 0.42 | 0.04 | 1     | 0.13 | 0.06 | 1 |
|     | 0.08     | 1 b1175 | 0.63 | 0.11 | 1     | 0.38 | 0.15 | 1 |
|     | 0.11     | 1       | 1.21 | 0.18 | 0     | 1.38 | 0.42 | 0 |
|     | 0.1      | 1       | 1.95 | 0.7  | 0     | 1.54 | 0.49 | 0 |
|     | 0.07     | 1 b4021 | 1.88 | 0.51 | 1     | 1.28 | 0.29 | 1 |
|     | 0.03     | 1       | 1.38 | 0.32 | 0     | 1.68 | 0.34 | 0 |
|     | 0.09     | 1 b3901 | 2.18 | 0.77 | 1     | 1.5  | 0.91 | 0 |
|     | 0.08 n/a | b3828   | 1.59 | 0.37 | 0     | 1.42 | 0.34 | 0 |
|     | 0.12 n/a |         | 1.67 | 0.32 | 0     | 1.65 | 0.18 | 0 |
|     | 0.03     | 1       | 1.13 | 0.2  | 0     | 1.11 | 0.72 | 1 |
|     | 0.04     | 1 b1468 | 1.23 | 0.49 | 0     | 1.35 | 0.29 | 1 |
|     | 0.06     | 1 b1429 | 1.02 | 0.39 | 0     | 1.14 | 0.41 | 1 |
|     | 0.09 n/a |         | 1.93 | 0.71 | 0     | 2.11 | 0.77 | 0 |
|     | 0.11     | 1       | 1.48 | 0.2  | 0     | 1.91 | 0.68 | 0 |
|     | 0.05     | 1 b0463 | 0.5  | 0.21 | 1     | 0.49 | 0.34 | 1 |
|     | 0.05     | 1       | 1.31 | 0.33 | 0     | 1.67 | 0.48 | 0 |
|     | 0.05     | 1 b1520 | 1.18 | 0.33 | 0     | 1.43 | 0.46 | 1 |

|     |      |         |       |      |       |      |      |   |
|-----|------|---------|-------|------|-------|------|------|---|
|     | 0.11 | 1 b0909 | 0.66  | 0.19 | 0     | 1.08 | 0.73 | 0 |
|     | 0.09 | 1 b0608 | 1.18  | 1.09 | 1     | 1.05 | 0.28 | 1 |
|     | 0.12 | 1 b1248 | 0.7   | 0.25 | 0     | 0.85 | 0.38 | 1 |
| n/a | n/a  |         | n/a   | n/a  | 0 n/a | n/a  |      | 0 |
| n/a | n/a  |         | n/a   | n/a  | 0 n/a | n/a  |      | 0 |
|     | 0.05 | 1 b1435 | 0.6   | 0.22 | 0     | 1.13 | 0.49 | 1 |
|     | 0.08 | n/a     | 0.52  | 0.07 | 1     | 0.55 | 0.24 | 1 |
| n/a | n/a  |         | n/a   | n/a  | 0 n/a | n/a  |      | 0 |
|     | 0.08 | 1 b1844 | 0.98  | 0.13 | 0     | 1.09 | 0.39 | 1 |
|     | 0.09 | 1 b2799 | 1.21  | 0.37 | 0     | 1.55 | 0.57 | 0 |
|     | 0.21 | 1       | 1.29  | 0.37 | 0     | 1.55 | 0.92 | 0 |
|     | 0.07 | 1 b2913 | 0.9   | 0.22 | 1     | 0.91 | 0.34 | 1 |
|     | 0.23 | 1 b2945 | 0.82  | 0.47 | 0     | 0.86 | 0.51 | 1 |
|     | 0.07 | 1 b0434 | 0.32  | 0.15 | 1     | 0.31 | 0.07 | 1 |
|     | 0.11 | 1 b3473 | 1.05  | 0.17 | 0     | 1.43 | 0.49 | 0 |
|     | 0.06 | 1 b3532 | 1.05  | 0.19 | 1     | 0.84 | 0.91 | 1 |
|     | 0.08 | 1 b3582 | 1.31  | 0.15 | 0     | 1.27 | 0.37 | 1 |
|     | 0.05 | 1 b3612 | 0.67  | 0.19 | 1     | 1    | 0.42 | 1 |
|     | 0.1  | 1 b2788 | 3.48  | 0.8  | 1     | 1.51 | 0.68 | 1 |
|     | 0.08 | 1 b2817 | 0.42  | 0.14 | 1     | 0.58 | 0.16 | 1 |
|     | 0.06 | 1 b2890 | 0.41  | 0.02 | 1     | 0.29 | 0.06 | 1 |
|     | 0.09 | 1 b3492 | 0.91  | 0.77 | 0     | 1.31 | 0.39 | 1 |
|     | 0.08 | 1 b2807 | 1.07  | 0.31 | 0     | 1.32 | 0.55 | 0 |
|     | 0.22 | n/a     | 1.44  | 0.45 | 0     | 1.67 | 1.53 | 0 |
| n/a | n/a  |         | n/a   | n/a  | 0 n/a | n/a  |      | 0 |
|     | 0.13 | 1 b3025 | 1.4   | 0.31 | 0     | 1.08 | 0.8  | 0 |
|     | 0.06 | 1 b2841 | 1.21  | 0.25 | 0     | 1.5  | 1.04 | 0 |
|     | 0.07 | 1 b2175 | 0.13  | 0.06 | 1     | 0.21 | 0.09 | 1 |
|     | 0.09 | 1 b2040 | 1.03  | 0.35 | 1     | 0.7  | 0.22 | 1 |
|     | 0.05 | 1 b2125 | 0.82  | 0.2  | 0     | 0.91 | 0.39 | 1 |
|     | 0.22 | 1 b0877 | 0.41  | 0.09 | 1     | 0.26 | 0.14 | 1 |
|     | 0.08 | 1 b3569 | 1.26  | 0.51 | 0     | 1.54 | 0.69 | 0 |
|     | 0.17 | 0       | 1.24  | 0.18 | 0     | 0.92 | 0.99 | 1 |
|     | 0.08 | 1 b3614 | 0.93  | 0.27 | 0     | 1.14 | 0.95 | 1 |
|     | 0.09 | 1 b3499 | 0.95  | 0.13 | 1     | 1.13 | 0.35 | 1 |
|     | 0.12 | 1 b3406 | 1.1   | 0.28 | 0     | 1.45 | 0.67 | 1 |
|     | 0.08 | 1 b3177 | 0.75  | 0.11 | 1     | 0.8  | 0.14 | 1 |
|     | 0.06 | 1       | 1.39  | 0.13 | 1     | 1.85 | 0.65 | 1 |
| n/a | n/a  |         | n/a   | n/a  | 0 n/a | n/a  |      | 0 |
|     | 0.09 | 1 b3166 | 0.77  | 1.35 | 1     | 0.95 | 0.36 | 1 |
|     | 0.08 | 1 b3034 | 0.87  | 1.75 | 0     | 1.09 | 0.36 | 1 |
|     | 0.11 | 1 b2958 | 0.95  | 0.18 | 1     | 0.61 | 0.19 | 1 |
|     | 0.42 | 1 b2687 | 1.21  | 0.27 | 1     | 1.01 | 0.26 | 1 |
|     | 0.11 | 1 b2141 | 1.22  | 0.29 | 0     | 1.71 | 0.61 | 0 |
|     | 0.08 | 1       | 2.81  | 0.56 | 1     | 1.96 | 0.69 | 1 |
|     | 0.14 | 1 b2183 | 0.8   | 0.29 | 0     | 1.07 | 0.38 | 1 |
|     | 0.06 | 1 b2113 | 0.58  | 0.07 | 1     | 0.57 | 0.12 | 1 |
|     | 0.11 | 1 b2390 | 15.94 | 7.42 | 1     | 3.59 | 4.26 | 1 |
|     | 0.12 | 1 b3305 | 0.35  | 0.1  | 1     | 0.09 | 0.02 | 1 |
|     | 0.09 | 1 b3363 | 0.17  | 0.05 | 1     | 0.29 | 0.21 | 1 |
|     | 0.03 | 1 b4174 | 0.45  | 0.05 | 1     | 0.36 | 0.13 | 1 |
|     | 0.09 | 1       | 1.25  | 0.2  | 0     | 1.35 | 0.73 | 0 |



|     |      |     |       |      |      |     |      |       |   |
|-----|------|-----|-------|------|------|-----|------|-------|---|
| n/a | n/a  |     | n/a   | n/a  | 0    | n/a | n/a  | 0     |   |
| n/a | n/a  |     | n/a   | n/a  | 0    | n/a | n/a  | 0     |   |
| n/a | n/a  |     | n/a   | n/a  | 0    | n/a | n/a  | 0     |   |
|     | 0.11 | n/a |       | 1.88 | 0.2  | 1   | 0.85 | 0.47  | 1 |
| n/a | n/a  |     | n/a   | n/a  | 0    | n/a | n/a  | 0     |   |
| n/a | n/a  |     | n/a   | n/a  | 0    | n/a | n/a  | 0     |   |
|     | 0.16 | n/a | b2601 | 0.82 | 0.1  | 1   | 1.11 | 0.25  | 0 |
|     | 0.08 | 1   |       | 1.49 | 0.45 | 0   | 1.26 | 2     | 0 |
|     | 0.08 | 1   |       | 1.63 | 0.37 | 0   | 1.88 | 1.74  | 0 |
|     | 0.06 | 1   |       | 1.29 | 0.22 | 1   | 0.67 | 0.23  | 1 |
|     | 0.13 | 1   |       | 1.29 | 0.38 | 0   | 1.32 | 0.27  | 0 |
|     | 0.06 | 1   |       | 1.17 | 0.27 | 0   | 1.17 | 0.35  | 1 |
|     | 0.1  | 1   |       | 0.36 | 0.11 | 1   | 0.43 | 0.11  | 1 |
|     | 0.06 | n/a |       | 0.98 | 0.29 | 1   | 1.15 | 1.22  | 1 |
|     | 0.11 | 1   |       | 1.05 | 0.15 | 1   | 0.82 | 0.3   | 1 |
|     | 0.19 | 1   |       | 1.44 | 0.32 | 0   | 1.29 | 0.36  | 0 |
|     | 0.1  | 1   |       | 1.09 | 0.24 | 0   | 0.82 | 0.25  | 1 |
|     | 0.06 | 1   |       | 1.28 | 0.44 | 0   | 1.59 | 0.56  | 0 |
|     | 0.03 | 1   |       | 1.49 | 0.42 | 0   | 1.41 | 0.59  | 0 |
|     | 0.11 | 1   |       | 1.33 | 0.18 | 0   | 1.33 | 0.37  | 0 |
|     | 0.11 | 1   |       | 1.36 | 0.32 | 0   | 1.62 | 0.55  | 0 |
|     | 0.16 | n/a |       | 1.19 | 0.35 | 0   | 1.76 | 0.47  | 0 |
|     | 0.06 | 1   |       | 1.23 | 0.33 | 0   | 1.6  | 0.87  | 0 |
|     | 0.06 | 1   |       | 1.1  | 0.33 | 0   | 1.14 | 0.52  | 1 |
|     | 0.06 | 1   |       | 1.02 | 0.21 | 0   | 1.46 | 0.56  | 0 |
|     | 0.12 | 1   |       | 1.36 | 0.21 | 0   | 1.75 | 0.46  | 0 |
|     | 0.06 | 1   |       | 1.59 | 0.48 | 0   | 1.25 | 0.5   | 0 |
|     | 0.09 | 1   |       | 1.18 | 0.31 | 0   | 1.16 | 0.35  | 1 |
|     | 0.06 | 1   |       | 1.19 | 0.37 | 0   | 1.3  | 0.31  | 1 |
|     | 0.08 | 1   |       | 0.96 | 0.24 | 1   | 0.9  | 0.49  | 1 |
|     | 0.14 | 1   |       | 1.17 | 0.27 | 0   | 1.18 | 0.53  | 0 |
|     | 0.27 | 1   |       | 1.19 | 0.68 | 0   | 1.47 | 127.9 | 0 |
|     | 0.09 | 1   |       | 0.87 | 0.09 | 1   | 0.53 | 0.26  | 1 |
|     | 0.07 | 1   |       | 1.01 | 0.22 | 0   | 1.08 | 0.25  | 1 |
|     | 0.08 | 1   |       | 1.41 | 0.33 | 0   | 1.05 | 0.68  | 1 |
|     | 0.07 | 1   |       | 0.98 | 0.15 | 0   | 1.1  | 0.99  | 0 |
|     | 0.11 | 1   |       | 2.08 | 0.22 | 1   | 1.64 | 0.61  | 1 |
|     | 0.11 | 1   |       | 1.38 | 0.29 | 0   | 1.7  | 1.01  | 0 |
|     | 0.12 | 1   | b3448 | 1.47 | 0.6  | 1   | 1.45 | 0.22  | 1 |
|     | 0.09 | 1   |       | 1.27 | 0.18 | 0   | 1.58 | 0.47  | 0 |
|     | 0.11 | 1   |       | 1.2  | 0.6  | 0   | 1.79 | 0.85  | 0 |
|     | 0.06 | 1   |       | 1.19 | 0.15 | 0   | 1.74 | 1.31  | 0 |
|     | 0.01 | 1   |       | 1.57 | 0.33 | 1   | 1.32 | 0.57  | 0 |
|     | 0.04 | 1   | b0149 | 0.77 | 0.13 | 1   | 0.88 | 0.72  | 1 |
|     | 0.08 | 1   | b0674 | 1.23 | 0.21 | 0   | 0.86 | 0.88  | 1 |
|     | 0.09 | 1   | b0694 | 1.35 | 0.22 | 0   | 1.43 | 0.53  | 0 |
|     | 0.15 | 1   |       | 1.25 | 0.35 | 0   | 1.81 | 0.65  | 0 |
|     | 0.02 | 1   |       | 1.16 | 0.32 | 0   | 1.8  | 0.89  | 0 |
|     | 0.05 | 1   | b3668 | 0.9  | 0.25 | 0   | 1.43 | 0.23  | 0 |
| n/a | n/a  |     | n/a   | n/a  | 0    | n/a | n/a  | 0     |   |
|     | 0.15 | 1   | b3744 | 2.24 | 0.38 | 1   | 1.61 | 0.31  | 0 |
|     | 0.09 | 1   |       | 1.17 | 0.66 | 0   | 1.78 | 0.58  | 0 |

|     |      |         |      |      |   |      |      |   |
|-----|------|---------|------|------|---|------|------|---|
|     | 0.04 | 1 b0077 | 1.26 | 0.53 | 0 | 1.44 | 0.51 | 0 |
|     | 0.09 | 1       | 1.37 | 0.49 | 0 | 1.46 | 0.68 | 0 |
| n/a | n/a  |         | n/a  | n/a  | 0 | n/a  | n/a  | 0 |
|     | 0.09 | 1 b3210 | 0.85 | 0.2  | 0 | 1.1  | 0.27 | 1 |
|     | 0.09 | 1 b3244 | 0.85 | 0.18 | 1 | 1.15 | 0.31 | 0 |
|     | 0.12 | 0       | 0.46 | 0.1  | 1 | 0.65 | 0.17 | 1 |
| n/a | n/a  |         | n/a  | n/a  | 0 | n/a  | n/a  | 0 |
|     | 0.04 | 1 b0680 | 0.57 | 0.08 | 1 | 0.62 | 0.9  | 1 |
|     | 0.1  | 1 b0711 | 0.92 | 0.37 | 0 | 1.04 | 0.2  | 0 |
|     | 0.05 | 1 b0194 | 0.26 | 0.28 | 1 | 0.55 | 0.32 | 1 |
|     | 0.09 | 1       | 1.14 | 0.27 | 0 | 1.5  | 0.32 | 0 |
|     | 0.17 | 1 b2057 | 1.28 | 0.44 | 0 | 1.64 | 0.56 | 0 |
|     | 0.14 | 1       | 1.35 | 0.29 | 0 | 1.36 | 0.52 | 0 |
| n/a | n/a  |         | n/a  | n/a  | 0 | n/a  | n/a  | 0 |
|     | 0.09 | 1 b0242 | 0.64 | 0.21 | 0 | 1.19 | 0.38 | 1 |
| n/a | n/a  |         | n/a  | n/a  | 0 | n/a  | n/a  | 0 |
|     | 0.08 | n/a     | 1.21 | 0.3  | 0 | 1.79 | 1.01 | 0 |
| n/a | n/a  |         | n/a  | n/a  | 0 | n/a  | n/a  | 0 |
|     | 0.13 | 1       | 0.46 | 0.13 | 1 | 0.33 | 0.25 | 1 |
|     | 0.13 | 1       | 1.1  | 0.44 | 0 | 1.24 | 0.35 | 0 |
|     | 0.09 | 1 b0999 | 1.44 | 0.27 | 0 | 1.71 | 0.62 | 0 |
| n/a | n/a  |         | n/a  | n/a  | 0 | n/a  | n/a  | 0 |
|     | 0.12 | 1 b2668 | 0.95 | 0.39 | 0 | 1.16 | 0.31 | 0 |
|     | 0.09 | 1       | 1.42 | 0.28 | 0 | 1.63 | 0.35 | 0 |
|     | 0.09 | 1 b3347 | 0.66 | 0.14 | 1 | 0.62 | 0.59 | 1 |
|     | 0.55 | 1 b3392 | 1.2  | 0.53 | 0 | 1.54 | 0.32 | 0 |
|     | 0.14 | 1       | 0.78 | 0.43 | 0 | 1.38 | 0.26 | 0 |
|     | 0.1  | 0       | 1.43 | 0.39 | 0 | 1.52 | 0.42 | 0 |
|     | 0.09 | 1 b1045 | 1.3  | 0.11 | 0 | 1.14 | 0.63 | 1 |
|     | 0.05 | 1 b1095 | 0.29 | 0.02 | 1 | 0.23 | 0.11 | 1 |
|     | 0.09 | 1 b1116 | 0.7  | 0.37 | 0 | 1.15 | 0.27 | 0 |
|     | 0.07 | 0       | 1.3  | 0.24 | 0 | 1.78 | 0.67 | 0 |
|     | 0.21 | 0 b3470 | 1.28 | 0.21 | 0 | 1.93 | 0.97 | 0 |
| n/a | n/a  |         | n/a  | n/a  | 0 | n/a  | n/a  | 0 |
| n/a | n/a  |         | n/a  | n/a  | 0 | n/a  | n/a  | 0 |
|     | 0.04 | 1 b4025 | 0.7  | 0.17 | 1 | 0.43 | 0.49 | 1 |
|     | 0.08 | 1 b4061 | 1.95 | 0.55 | 1 | 1.61 | 0.3  | 0 |
|     | 0.08 | 1 b4118 | 1.25 | 0.18 | 0 | 1.61 | 0.35 | 0 |
|     | 0.12 | 1       | 1.51 | 0.46 | 0 | 1.09 | 0.91 | 0 |
|     | 0.07 | 1 b4055 | 0.54 | 0.06 | 1 | 0.21 | 0.47 | 1 |
|     | 0.06 | 1 b4078 | 0.72 | 0.18 | 1 | 0.75 | 0.76 | 1 |
|     | 0.11 | 1 b4139 | 1.43 | 0.23 | 1 | 0.6  | 1.83 | 1 |
|     | 0.03 | 1 b0863 | 0.62 | 0.34 | 1 | 0.71 | 0.26 | 1 |
| n/a | n/a  |         | n/a  | n/a  | 0 | n/a  | n/a  | 0 |
|     | 0.05 | 1 b0873 | 1.08 | 3.83 | 0 | 1.61 | 1.44 | 0 |
|     | 0.08 | 1       | 1.28 | 0.54 | 0 | 1.53 | 0.44 | 0 |
| n/a | n/a  |         | n/a  | n/a  | 0 | n/a  | n/a  | 0 |
| n/a | n/a  |         | n/a  | n/a  | 0 | n/a  | n/a  | 0 |
|     | 0.07 | 1       | 1.19 | 0.57 | 0 | 1.57 | 4.88 | 0 |
|     | 0.12 | 1 b0855 | 1.04 | 0.26 | 0 | 1.8  | 0.58 | 0 |
| n/a | n/a  |         | n/a  | n/a  | 0 | n/a  | n/a  | 0 |
|     | 0.07 | 1 b0154 | 0.37 | 0.18 | 1 | 0.77 | 0.13 | 1 |

|     |      |         |      |      |   |      |      |   |
|-----|------|---------|------|------|---|------|------|---|
|     | 0.06 | 1 b0333 | 1.72 | 0.23 | 0 | 1.6  | 0.43 | 0 |
|     | 0.08 | 1 b1704 | 0.84 | 0.43 | 0 | 1.3  | 0.6  | 0 |
|     | 0.1  | 0 b1905 | 0.74 | 0.36 | 0 | 1.2  | 0.4  | 0 |
|     | 0.07 | 1 b1962 | 1.39 | 0.5  | 0 | 1.76 | 0.7  | 0 |
|     | 0.09 | 1 b2218 | 1.01 | 0.62 | 0 | 1.11 | 0.41 | 1 |
| n/a | n/a  |         | n/a  | n/a  | 0 | n/a  | n/a  | 0 |
|     | 0.09 | 1 b2265 | 0.77 | 0.35 | 0 | 1.29 | 0.48 | 0 |
|     | 0.12 | 1 b2295 | 1.39 | 0.24 | 0 | 1.74 | 0.6  | 0 |
|     | 0.03 | 1       | 1.73 | 1.71 | 0 | 2.18 | 1.1  | 0 |
|     | 0.05 | 1 b2741 | 1.02 | 0.15 | 1 | 0.52 | 1.4  | 1 |
|     | 0.07 | 1 b0158 | 0.85 | 0.23 | 1 | 1.42 | 0.41 | 0 |
| n/a | n/a  |         | n/a  | n/a  | 0 | n/a  | n/a  | 0 |
|     | 0.06 | 1 b1711 | 0.89 | 0.29 | 0 | 1.34 | 0.26 | 1 |
|     | 0.05 | 1 b0963 | 0.85 | 0.2  | 0 | 1.11 | 0.31 | 1 |
|     | 0.17 | 1       | 0.62 | 0.58 | 0 | 0.87 | 0.1  | 1 |
|     | 0.27 | 1       | 0.57 | 0.47 | 1 | 0.63 | 0.28 | 1 |
|     | 0.15 | 1 b1912 | 0.67 | 0.13 | 0 | 1.8  | 0.63 | 0 |
|     | 0.07 | 1       | 0.8  | 0.2  | 0 | 0.98 | 0.49 | 1 |
|     | 0.08 | 1 b1656 | 0.75 | 0.07 | 1 | 0.42 | 0.97 | 1 |
|     | 0.08 | 1       | 1.31 | 1.48 | 0 | 1.44 | 0.62 | 0 |
|     | 0.07 | 1 b3635 | 0.86 | 0.4  | 0 | 1.14 | 2.18 | 1 |
|     | 0.08 | 1 b3625 | 1.27 | 0.49 | 0 | 1.6  | 0.5  | 0 |
|     | 0.08 | 1 b1604 | 0.58 | 0.34 | 1 | 0.58 | 0.13 | 1 |
|     | 0.06 | 1 b1612 | 0.67 | 0.08 | 1 | 0.26 | 0.56 | 1 |
|     | 0.04 | 1 b1588 | 2.44 | 0.64 | 1 | 1.55 | 0.78 | 1 |
|     | 0.08 | 1       | 1.84 | 0.77 | 0 | 1.52 | 0.24 | 0 |
|     | 0.09 | 1 b0219 | 1.32 | 0.41 | 0 | 1.34 | 0.27 | 0 |
|     | 0.12 | 1       | 2.82 | 0.72 | 0 | 2.19 | 0.54 | 0 |
|     | 0.06 | 1       | 1.33 | 0.18 | 0 | 1.74 | 0.5  | 0 |
|     | 0.07 | 1 b2011 | 0.63 | 0.39 | 0 | 1.49 | 0.4  | 0 |
|     | 0.06 | 1 b0095 | 1.19 | 0.09 | 1 | 0.96 | 0.34 | 1 |
|     | 0.06 | 1 b2283 | 0.53 | 0.13 | 1 | 0.54 | 0.15 | 1 |
|     | 0.1  | 1 b0238 | 0.47 | 0.3  | 1 | 0.81 | 0.47 | 1 |
|     | 0.18 | 0 b1949 | 1.65 | 0.52 | 0 | 1.76 | 0.32 | 0 |
|     | 0.05 | 1 b1595 | 1.28 | 0.44 | 0 | 1.57 | 0.62 | 0 |
|     | 0.1  | 1 b3341 | 0.1  | 0.03 | 1 | 0.08 | 0.05 | 1 |
|     | 0.12 | 1 b3710 | 1    | 0.42 | 0 | 1.34 | 0.48 | 1 |
|     | 0.1  | 1 b0387 | 1.5  | 0.47 | 0 | 1.79 | 0.46 | 0 |
|     | 0.08 | 1       | 0.99 | 0.18 | 1 | 0.5  | 2.19 | 1 |
|     | 0.18 | 1 b4065 | 1.23 | 0.14 | 0 | 1.33 | 0.39 | 0 |
|     | 0.11 | 1       | 0.86 | 0.44 | 0 | 1.07 | 0.38 | 0 |
|     | 0.16 | 0       | 1.64 | 0.5  | 0 | 1.08 | 1.32 | 0 |
| n/a | n/a  |         | n/a  | n/a  | 0 | n/a  | n/a  | 0 |
|     | 0.06 | 1       | 1.31 | 0.35 | 0 | 1.5  | 1.12 | 0 |
|     | 0.06 | 1 b2509 | 0.8  | 0.29 | 0 | 1.2  | 0.42 | 1 |
|     | 0.13 | 0 b0488 | 1.41 | 0.23 | 1 | 1.37 | 0.55 | 0 |
|     | 0.1  | 1       | 1.3  | 6.42 | 0 | 1.76 | 0.72 | 0 |
|     | 0.1  | 1 b3040 | 1.17 | 1.98 | 0 | 1.63 | 0.91 | 0 |
|     | 0.08 | 1 b3084 | 0.97 | 0.48 | 0 | 1.22 | 0.33 | 0 |
|     | 0.14 | 1 b3148 | 0.96 | 0.24 | 0 | 1.21 | 0.16 | 0 |
| n/a | n/a  |         | n/a  | n/a  | 0 | n/a  | n/a  | 0 |
|     | 0.05 | 1 b1214 | 0.56 | 0.12 | 1 | 0.63 | 0.15 | 1 |

|      |     |       |       |      |   |       |      |   |
|------|-----|-------|-------|------|---|-------|------|---|
| 0.06 | 1   | b2256 | 0.24  | 0.06 | 1 | 0.36  | 0.24 | 1 |
| 0.11 | 1   | b2432 | 0.57  | 0.23 | 0 | 1.25  | 0.48 | 0 |
| 0.09 | 1   |       | 1.19  | 0.26 | 0 | 1.55  | 0.51 | 0 |
| 0.13 | 1   | b2664 | 1.44  | 1.55 | 0 | 1.95  | 0.99 | 0 |
| 0.1  | 1   | b4328 | 1.01  | 0.26 | 0 | 1.32  | 0.31 | 0 |
| 0.1  | 1   |       | 1.56  | 0.77 | 0 | 1.58  | 0.72 | 0 |
| 0.09 | n/a | b3560 | 0.25  | 0.19 | 1 | 0.73  | 0.57 | 1 |
| 0.05 | 1   | b1235 | 0.75  | 0.17 | 1 | 0.81  | 0.42 | 1 |
| 0.04 | 1   | b1293 | 0.8   | 0.22 | 0 | 1.1   | 0.25 | 0 |
| 0.1  | 1   | b3905 | 1.29  | 0.4  | 0 | 1.42  | 0.36 | 0 |
| 0.06 | 1   | b3862 | 1.19  | 0.54 | 0 | 1.4   | 0.42 | 0 |
| 0.05 | 1   | b0790 | 1.81  | 0.48 | 0 | 2.09  | 0.69 | 0 |
| 0.21 | 1   | b0778 | 1.8   | 0.41 | 0 | 1.66  | 0.88 | 0 |
| 0.08 | 1   | b0050 | 0.63  | 0.32 | 0 | 1.42  | 0.35 | 1 |
| 0.14 | 1   | b3896 | 1.57  | 0.42 | 0 | 2.02  | 0.39 | 0 |
| 0.14 | 1   | b0636 | 0.63  | 0.21 | 0 | 0.8   | 0.86 | 1 |
| 0.09 | 1   | b0212 | 1.22  | 0.23 | 0 | 1.05  | 0.19 | 1 |
| 0.06 | 1   | b0908 | 0.62  | 0.51 | 0 | 0.85  | 0.37 | 1 |
| 0.04 | 1   | b2310 | 0.77  | 0.32 | 0 | 1.24  | 0.36 | 1 |
| 0.11 | 1   | b2617 | 1.05  | 0.11 | 1 | 0.97  | 0.44 | 1 |
| 0.17 | 0   |       | 1.44  | 0.31 | 0 | 2.18  | 1.19 | 0 |
| 0.13 | 0   |       | 1.48  | 0.42 | 0 | 2.26  | 0.82 | 0 |
| 0.12 | 0   |       | 1.6   | 0.52 | 0 | 2.03  | 1.21 | 0 |
| 0.12 | 1   | b3498 | 0.86  | 0.17 | 0 | 1.48  | 0.27 | 0 |
| 0.09 | n/a | b0709 | 1.44  | 0.38 | 0 | 1.58  | 0.6  | 0 |
| 0.17 | 1   |       | 1.16  | 0.13 | 0 | 2.11  | 0.79 | 0 |
| 0.06 | n/a | b1906 | 1.05  | 1.43 | 0 | 1.35  | 0.38 | 0 |
| 0.11 | 1   | b1322 | 1.14  | 0.61 | 0 | 1.59  | 0.49 | 0 |
| 0.1  | 1   | b2570 | 1.2   | 0.2  | 0 | 1.56  | 0.51 | 0 |
| 0.05 | 1   |       | 1.16  | 0.23 | 0 | 1.78  | 0.78 | 0 |
| 0.06 | 1   | b2786 | 1.11  | 0.29 | 0 | 1.12  | 0.39 | 1 |
| 0.16 | n/a |       | 1.22  | 0.29 | 0 | 2.06  | 0.73 | 0 |
| n/a  | n/a |       | n/a   | n/a  | 0 | n/a   | n/a  | 0 |
| 0.13 | 0   |       | 1.45  | 0.16 | 0 | 1.89  | 0.64 | 0 |
| 0.09 | 1   | b3179 | 2.75  | 0.79 | 1 | 1.3   | 1.73 | 1 |
| 0.04 | 1   |       | 1.77  | 0.34 | 0 | 1.54  | 0.5  | 0 |
| 0.14 | 1   | b4072 | 1.63  | 0.3  | 0 | 1.85  | 0.53 | 0 |
| 0.1  | 1   | b1944 | 1.09  | 0.31 | 0 | 1.26  | 0.61 | 0 |
| 0.04 | 1   |       | 1.08  | 0.16 | 0 | 1.26  | 0.22 | 0 |
| 0.08 | 1   | b3966 | 0.65  | 0.38 | 1 | 0.78  | 0.4  | 1 |
| 0.07 | 1   | b0606 | 24.89 | 9.73 | 1 | 10.15 | 8.6  | 1 |
| 0.06 | 1   | b1245 | 1.39  | 0.3  | 0 | 1.47  | 0.59 | 0 |
| 0.07 | 1   | b1511 | 1.89  | 0.44 | 0 | 1.66  | 0.27 | 0 |
| 0.1  | 1   |       | 1.05  | 0.23 | 1 | 1.48  | 0.41 | 1 |
| 0.05 | 1   | b3813 | 1.65  | 0.33 | 1 | 1.14  | 1.56 | 1 |
| 0.1  | 1   | b0046 | 1.43  | 0.36 | 0 | 1.39  | 0.86 | 0 |
| 0.14 | 1   | b2909 | 0.97  | 0.18 | 1 | 0.77  | 0.64 | 1 |
| 0.03 | 1   | b1940 | 0.86  | 0.27 | 0 | 1.17  | 0.12 | 1 |
| 0.06 | 1   |       | 0.88  | 0.12 | 1 | 1.06  | 0.14 | 1 |
| 0.07 | 1   | b2416 | 0.72  | 0.1  | 1 | 0.33  | 0.4  | 1 |
| 0.03 | 1   | b1271 | 0.45  | 0.11 | 1 | 0.44  | 0.33 | 1 |
| 0.13 | 1   | b2777 | 0.98  | 0.28 | 1 | 0.8   | 0.43 | 1 |

|      |     |       |      |      |   |      |      |   |
|------|-----|-------|------|------|---|------|------|---|
| 0.17 | 1   | b2765 | 0.79 | 0.24 | 0 | 0.94 | 0.74 | 0 |
| 0.09 | 1   |       | 1.62 | 0.8  | 0 | 1.73 | 0.57 | 0 |
| 0.08 | 1   | b1878 | 1.03 | 0.47 | 0 | 1.93 | 1.7  | 0 |
| 0.08 | 1   | b1342 | 1.05 | 0.34 | 0 | 1.49 | 0.47 | 0 |
| 0.07 | n/a |       | 1.4  | 0.38 | 0 | 1.64 | 0.62 | 0 |
| 0.04 | n/a |       | 0.45 | 0.06 | 1 | 0.44 | 0.85 | 1 |
| 0.07 | 1   | b1817 | 1.86 | 0.29 | 1 | 1.5  | 1.65 | 1 |
| 0.07 | 1   | b1838 | 1.15 | 0.24 | 0 | 1.72 | 0.54 | 0 |
| 0.09 | 1   | b1865 | 0.58 | 0.23 | 1 | 0.98 | 0.27 | 1 |
| 0.08 | 1   | b0861 | 0.68 | 0.19 | 1 | 1.51 | 0.44 | 0 |
| 0.11 | 1   |       | 1.46 | 0.27 | 0 | 1.76 | 0.34 | 0 |
| 0.04 | 1   | b0928 | 0.11 | 0.12 | 1 | 0.19 | 0.1  | 1 |
| 0.07 | 1   | b0587 | 1.28 | 0.23 | 0 | 1.44 | 0.37 | 0 |
| 0.07 | 1   |       | 1.26 | 0.26 | 0 | 1.7  | 0.5  | 0 |
| 0.08 | 1   |       | 1.11 | 0.25 | 0 | 1.74 | 0.45 | 0 |
| 0.06 | 1   | b1243 | 0.44 | 0.2  | 1 | 0.44 | 0.1  | 1 |
| 0.07 | 1   |       | 1.27 | 0.28 | 0 | 1.75 | 0.42 | 0 |
| 0.04 | 1   | b1815 | 1.01 | 0.16 | 0 | 1.4  | 0.2  | 0 |
| 0.07 | 1   | b1378 | 3.16 | 0.61 | 1 | 2.23 | 1.18 | 1 |
| 0.04 | 1   |       | 1    | 0.14 | 0 | 1.34 | 0.38 | 0 |
| 0.07 | 1   |       | 1.11 | 0.44 | 0 | 1.08 | 0.66 | 0 |
| 0.08 | 1   |       | 0.74 | 0.27 | 1 | 1.18 | 0.64 | 1 |
| n/a  | n/a |       | n/a  | n/a  | 0 | n/a  | n/a  | 0 |
| 0.1  | 1   |       | 1.64 | 0.26 | 0 | 1.49 | 0.46 | 0 |
| 0.05 | 1   | b0409 | 0.59 | 0.09 | 1 | 1.09 | 0.65 | 1 |
| 0.14 | 1   | b2995 | 1.33 | 0.21 | 0 | 1.4  | 0.88 | 0 |
| 0.11 | 1   | b2700 | 1.5  | 0.28 | 1 | 2.16 | 0.66 | 0 |
| 0.08 | 1   |       | 1.1  | 0.34 | 0 | 1.59 | 0.65 | 0 |
| n/a  | n/a |       | n/a  | n/a  | 0 | n/a  | n/a  | 0 |
| 0.05 | 1   |       | 0.86 | 0.14 | 0 | 1.21 | 1.19 | 0 |
| n/a  | n/a |       | n/a  | n/a  | 0 | n/a  | n/a  | 0 |
| 0.1  | 1   | b2835 | 0.85 | 0.18 | 1 | 1.41 | 0.28 | 1 |
| 0.11 | 1   | b2935 | 0.26 | 0.05 | 1 | 0.21 | 0.19 | 1 |
| 0.13 | 1   | b2717 | 1.29 | 0.48 | 0 | 1.56 | 0.83 | 0 |
| 0.09 | 1   | b3554 | 0.68 | 0.19 | 1 | 0.79 | 0.37 | 1 |
| 0.09 | 1   | b3588 | 1.42 | 0.07 | 1 | 1.07 | 0.42 | 1 |
| 0.08 | 1   |       | 1.35 | 0.33 | 0 | 1.44 | 0.47 | 0 |
| 0.04 | 1   | b2805 | 0.85 | 0.11 | 0 | 0.96 | 0.38 | 1 |
| 0.05 | n/a |       | 1.15 | 0.44 | 0 | 1.1  | 0.57 | 0 |
| 0.11 | 1   | b2156 | 0.89 | 0.34 | 0 | 1.22 | 0.98 | 0 |
| n/a  | n/a |       | n/a  | n/a  | 0 | n/a  | n/a  | 0 |
| 0.09 | 1   |       | 0.98 | 0.27 | 0 | 1.6  | 0.61 | 0 |
| 0.11 | 1   |       | 0.38 | 0.06 | 1 | 1.32 | 0.61 | 0 |
| 0.1  | 1   | b3315 | 0.28 | 0.05 | 1 | 0.25 | 0.22 | 1 |
| 0.08 | 1   | b4175 | 0.51 | 0.09 | 1 | 0.69 | 0.28 | 1 |
| 0.11 | 1   | b3294 | 0.29 | 0.05 | 1 | 0.56 | 0.36 | 1 |
| 0.06 | 1   | b0878 | 0.76 | 0.2  | 1 | 1.41 | 0.74 | 1 |
| 0.1  | 1   | b4177 | 0.43 | 0.06 | 1 | 0.38 | 1.42 | 1 |
| 0.05 | 1   | b3124 | 5.97 | 1.17 | 1 | 2.44 | 2.09 | 1 |
| 0.08 | 1   | b2996 | 1.14 | 0.28 | 0 | 1.52 | 0.61 | 0 |
| 0.09 | 1   | b2703 | 2.94 | 0.79 | 1 | 2.36 | 0.55 | 1 |
| 0.14 | 1   |       | 1.2  | 0.17 | 0 | 1.63 | 1.51 | 0 |



|     |          |         |       |      |       |      |      |   |
|-----|----------|---------|-------|------|-------|------|------|---|
|     | 0.11     | 1 b4389 | 0.85  | 0.19 | 0     | 1.39 | 0.6  | 0 |
| n/a | n/a      |         | n/a   | n/a  | 0 n/a | n/a  |      | 0 |
|     | 0.07     | 1       | 1.22  | 0.25 | 0     | 1.88 | 0.79 | 0 |
|     | 0.05     | 1 b2170 | 0.97  | 0.46 | 0     | 1.96 | 1.05 | 0 |
|     | 0.04     | 1       | 0.69  | 0.05 | 1     | 0.64 | 0.25 | 1 |
|     | 0.05     | 1       | 0.79  | 0.17 | 1     | 0.72 | 0.32 | 1 |
|     | 0.25     | 1       | 1.6   | 0.33 | 0     | 1.06 | 0.8  | 0 |
|     | 0.05     | 1 b1223 | 1.39  | 0.5  | 0     | 1.61 | 0.77 | 0 |
|     | 0.09     | 1 b3575 | 1.35  | 0.36 | 0     | 1.74 | 0.6  | 0 |
|     | 0.12     | 1 b3468 | 1.1   | 0.16 | 1     | 1.63 | 0.28 | 0 |
|     | 0.16     | 1 b3222 | 2.06  | 0.36 | 1     | 1.54 | 0.37 | 0 |
|     | 0.12     | 1 b3095 | 0.93  | 0.12 | 1     | 1.44 | 0.37 | 0 |
|     | 0.08     | 1       | 0.71  | 0.39 | 0     | 1.25 | 0.22 | 0 |
|     | 0.12     | 0       | 1.54  | 0.31 | 0     | 1.9  | 0.73 | 0 |
|     | 0.05     | 1       | 0.65  | 0.2  | 1     | 1.42 | 0.29 | 1 |
|     | 0.06     | 1 b0819 | 0.43  | 0.21 | 1     | 1.2  | 0.43 | 1 |
|     | 0.08     | 1 b2907 | 1.2   | 0.29 | 1     | 1.31 | 0.6  | 1 |
|     | 0.12     | 1       | 1.36  | 0.48 | 0     | 2.05 | 0.66 | 0 |
|     | 0.08     | 1       | 1.04  | 0.8  | 0     | 1.37 | 0.57 | 1 |
|     | 0.03     | 1 b0808 | 1.03  | 0.7  | 0     | 1.43 | 0.92 | 0 |
|     | 0.09     | 1       | 1.51  | 0.25 | 0     | 1.8  | 0.67 | 0 |
|     | 0.07     | 1       | 1.68  | 0.42 | 0     | 1.99 | 0.42 | 0 |
|     | 0.08     | 1 b3037 | 0.44  | 0.08 | 1     | 0.56 | 0.16 | 1 |
|     | 0.16     | 1 b2462 | 1.35  | 0.24 | 0     | 1.97 | 0.9  | 0 |
|     | 0.17     | 1       | 1.15  | 0.13 | 1     | 1.1  | 0.71 | 1 |
|     | 0.13     | 1 b3730 | 0.12  | 0.03 | 1     | 0.14 | 0.05 | 1 |
|     | 0.04     | 1 b0422 | 0.76  | 0.22 | 0     | 1.46 | 0.82 | 0 |
|     | 0.08     | 1 b2673 | 2.01  | 0.57 | 0     | 1.67 | 0.78 | 0 |
|     | 0.07     | 1 b0443 | 0.75  | 0.15 | 1     | 1.49 | 0.98 | 0 |
| n/a | n/a      |         | n/a   | n/a  | 0 n/a | n/a  |      | 0 |
|     | 0.09     | 1 b3309 | 0.3   | 0.07 | 1     | 0.09 | 0.11 | 1 |
|     | 0.12     | 1 b3311 | 0.28  | 0.03 | 1     | 0.56 | 0.5  | 1 |
|     | 0.13     | 1 b4212 | 1.26  | 0.29 | 0     | 2.14 | 1.14 | 0 |
|     | 0.05     | 1       | 11.83 | 2.2  | 1     | 3.08 | 1.92 | 1 |
|     | 0.06     | 1       | 1.48  | 0.45 | 0     | 1.64 | 0.93 | 0 |
|     | 0.08     | 1 b0952 | 0.97  | 0.24 | 0     | 1.18 | 0.29 | 1 |
|     | 0.11     | 1 b2586 | 1.1   | 0.12 | 0     | 1.45 | 0.34 | 0 |
|     | 0.13     | 1 b1643 | 0.84  | 0.18 | 0     | 1.51 | 0.44 | 0 |
| n/a | n/a      |         | n/a   | n/a  | 0 n/a | n/a  |      | 0 |
|     | 0.09     | 1 b3936 | 0.55  | 0.1  | 1     | 0.65 | 0.32 | 1 |
|     | 0.19     | 1       | 1.29  | 0.35 | 0     | 1.78 | 0.87 | 0 |
|     | 0.06     | 1       | 0.94  | 0.14 | 1     | 0.53 | 1.01 | 1 |
|     | 0.09     | 1 b1259 | 1.51  | 0.35 | 0     | 1.66 | 1.03 | 0 |
|     | 0.08     | 1 b1796 | 1.55  | 0.7  | 0     | 1.78 | 0.66 | 0 |
|     | 0.08 n/a |         | 1.43  | 0.17 | 0     | 1.87 | 1.31 | 0 |
|     | 0.24     | 0 b0189 | 0.33  | 0.06 | 1     | 0.56 | 0.28 | 1 |
|     | 0.14     | 1       | 1.3   | 0.36 | 0     | 1.85 | 0.52 | 0 |
|     | 0.24 n/a |         | 1.58  | 0.48 | 0     | 1.58 | 0.81 | 0 |
|     | 0.14     | 0       | 1.43  | 0.47 | 0     | 1.86 | 1    | 0 |
|     | 0.16     | 0       | 1.44  | 1.38 | 0     | 1.67 | 1.43 | 0 |
|     | 0.19     | 0       | 1.29  | 0.26 | 0     | 2.01 | 0.85 | 0 |
|     | 0.08     | 1 b1836 | 1.21  | 0.16 | 0     | 1.49 | 0.86 | 0 |

|      |     |   |       |      |       |     |      |      |   |
|------|-----|---|-------|------|-------|-----|------|------|---|
| n/a  | n/a |   | n/a   | n/a  | 0     | n/a | n/a  | 0    |   |
| n/a  | n/a |   | n/a   | n/a  | 0     | n/a | n/a  | 0    |   |
| n/a  | n/a |   | n/a   | n/a  | 0     | n/a | n/a  | 0    |   |
| n/a  | n/a |   | n/a   | n/a  | 0     | n/a | n/a  | 0    |   |
| n/a  | n/a |   | n/a   | n/a  | 0     | n/a | n/a  | 0    |   |
| n/a  | n/a |   | n/a   | n/a  | 0     | n/a | n/a  | 0    |   |
| n/a  | n/a |   | n/a   | n/a  | 0     | n/a | n/a  | 0    |   |
| n/a  | n/a |   | n/a   | n/a  | 0     | n/a | n/a  | 0    |   |
| n/a  | n/a |   | n/a   | n/a  | 0     | n/a | n/a  | 0    |   |
| n/a  | n/a |   | n/a   | n/a  | 0     | n/a | n/a  | 0    |   |
| n/a  | n/a |   | n/a   | n/a  | 0     | n/a | n/a  | 0    |   |
| n/a  | n/a |   | n/a   | n/a  | 0     | n/a | n/a  | 0    |   |
| n/a  | n/a |   | n/a   | n/a  | 0     | n/a | n/a  | 0    |   |
| n/a  | n/a |   | n/a   | n/a  | 0     | n/a | n/a  | 0    |   |
| n/a  | n/a |   | n/a   | n/a  | 0     | n/a | n/a  | 0    |   |
| n/a  | n/a |   | n/a   | n/a  | 0     | n/a | n/a  | 0    |   |
| n/a  | n/a |   | n/a   | n/a  | 0     | n/a | n/a  | 0    |   |
| n/a  | n/a |   | n/a   | n/a  | 0     | n/a | n/a  | 0    |   |
| n/a  | n/a |   | n/a   | n/a  | 0     | n/a | n/a  | 0    |   |
| 0.07 |     | 1 | b0709 | 1.28 | 0.19  | 0   | 1.42 | 0.79 | 0 |
| 0.05 | n/a |   |       | 0.55 | 0.32  | 1   | 1.35 | 0.73 | 0 |
| 0.07 |     | 1 |       | 0.96 | 0.15  | 1   | 1.5  | 0.3  | 0 |
| n/a  | n/a |   | n/a   | n/a  |       | 0   | n/a  | n/a  | 0 |
| 0.09 | n/a |   | b0864 | 0.5  | 0.2   | 1   | 1.1  | 0.59 | 1 |
| 0.05 |     | 1 |       | 1.3  | 0.77  | 0   | 2.11 | 0.68 | 0 |
| 0.08 |     | 1 |       | 0.88 | 0.07  | 1   | 1.9  | 2.93 | 1 |
| 0.13 |     | 1 |       | 1.65 | 0.37  | 0   | 1.52 | 0.45 | 0 |
| 0.05 |     | 1 |       | 1.13 | 0.18  | 1   | 1.28 | 0.28 | 1 |
| 0.07 |     | 1 |       | 0.59 | 0.09  | 1   | 0.53 | 0.38 | 1 |
| 0.04 |     | 1 |       | 1.3  | 0.29  | 0   | 1.68 | 1.07 | 0 |
| 0.06 |     | 1 |       | 0.77 | 0.13  | 1   | 1.62 | 0.58 | 0 |
| 0.09 |     | 1 |       | 1.49 | 0.29  | 0   | 1.66 | 0.5  | 0 |
| 0.07 | n/a |   |       | 1.14 | 0.23  | 0   | 1.2  | 0.32 | 0 |
| 0.08 |     | 1 |       | 1.13 | 0.18  | 0   | 1.47 | 0.66 | 0 |
| 0.09 |     | 0 |       | 1.78 | 11.78 | 0   | 1.63 | 0.59 | 0 |
| 0.05 |     | 1 |       | 1.22 | 0.18  | 0   | 1.63 | 0.73 | 0 |
| 0.09 |     | 1 |       | 1.54 | 0.46  | 0   | 2.12 | 0.5  | 0 |
| 0.06 |     | 1 |       | 1.2  | 0.29  | 1   | 1.47 | 0.36 | 0 |
| 0.06 | n/a |   |       | 1.19 | 0.15  | 1   | 1.68 | 0.63 | 0 |
| 0.07 |     | 1 |       | 1.19 | 0.36  | 0   | 2.02 | 1.05 | 0 |
| 0.05 |     | 0 |       | 1.79 | 23.71 | 0   | 1.55 | 1.56 | 0 |
| 0.05 |     | 1 |       | 1.41 | 0.2   | 0   | 1.68 | 0.46 | 0 |
| 0.07 |     | 1 |       | 0.58 | 0.19  | 1   | 0.98 | 0.25 | 1 |
| 0.09 |     | 1 |       | 1.02 | 0.23  | 0   | 1.51 | 0.87 | 1 |
| 0.06 |     | 1 |       | 1.02 | 0.17  | 0   | 1.44 | 0.21 | 0 |
| 0.07 |     | 1 |       | 1.38 | 0.42  | 0   | 2.33 | 0.85 | 0 |
| 0.05 |     | 1 |       | 1.24 | 0.31  | 0   | 1.97 | 0.43 | 0 |
| 0.08 |     | 1 |       | 1.41 | 0.32  | 0   | 1.93 | 0.77 | 0 |
| 0.1  |     | 1 |       | 1.41 | 0.3   | 1   | 0.57 | 0.95 | 1 |
| 0.12 |     | 1 |       | 1.45 | 0.22  | 0   | 2.05 | 0.78 | 0 |
| 0.08 |     | 1 |       | 1.27 | 0.15  | 0   | 1.78 | 0.29 | 0 |
| 0.04 |     | 1 |       | 1.23 | 0.19  | 1   | 0.73 | 2.48 | 1 |
| 0.06 |     | 1 |       | 1.02 | 0.2   | 0   | 2.06 | 0.78 | 0 |
| 0.09 |     | 1 |       | 0.87 | 0.17  | 1   | 1.55 | 0.9  | 0 |
| 0.11 |     | 1 |       | 1.1  | 0.18  | 0   | 2.09 | 0.5  | 0 |
| 0.06 |     | 1 |       | 1.06 | 0.22  | 1   | 1.72 | 1.62 | 0 |
| 0.1  |     | 1 |       | 1.28 | 0.25  | 0   | 1.84 | 0.29 | 0 |

|     |      |           |     |       |      |   |       |       |   |
|-----|------|-----------|-----|-------|------|---|-------|-------|---|
|     | 0.12 | 1         |     | 1.13  | 0.18 | 0 | 1.3   | 0.75  | 0 |
|     | 0.16 | 1         |     | 1.38  | 0.87 | 0 | 1.95  | 0.56  | 0 |
|     | 0.08 | 1         |     | 1.33  | 0.16 | 0 | 1.56  | 0.29  | 0 |
|     | 0.08 | 1 b0958   |     | 9.72  | 2.43 | 1 | 4.85  | 36.53 | 1 |
|     | 0.14 | 1 b4032   |     | 1.1   | 0.11 | 0 | 1.22  | 0.34  | 0 |
|     | 0.16 | 1 b0106   |     | 0.84  | 0.8  | 0 | 1.17  | 1.17  | 1 |
|     | 0.08 | 1 b0128   |     | 0.96  | 0.99 | 0 | 1.51  | 0.54  | 0 |
|     | 0.12 | 1 b0151   |     | 1.03  | 0.35 | 0 | 1.9   | 0.56  | 0 |
|     | 0.04 | 1 b0198   |     | 0.96  | 0.14 | 1 | 1.06  | 0.91  | 1 |
|     | 0.21 | 1 b3252   |     | 0.89  | 1.48 | 0 | 0.94  | 0.2   | 1 |
|     | 0.16 | 1         |     | 1.11  | 0.14 | 0 | 1.13  | 0.29  | 1 |
|     | 0.08 | 1 b0678   |     | 21.75 | 8.77 | 1 | 19.64 | 11.48 | 1 |
| n/a | n/a  |           | n/a | n/a   |      | 0 | n/a   | n/a   | 0 |
|     | 0.2  | 0 b3703   |     | 1.01  | 0.3  | 0 | 1.7   | 0.69  | 0 |
|     | 0.06 | 1         |     | 1.37  | 0.49 | 0 | 1.62  | 0.54  | 0 |
| n/a | n/a  |           | n/a | n/a   |      | 0 | n/a   | n/a   | 0 |
|     | 0.13 | 1 b3713   |     | 1.08  | 0.18 | 0 | 1.41  | 0.34  | 0 |
|     | 0.16 | 1 b3751   |     | 1.46  | 0.17 | 1 | 1.49  | 1.37  | 1 |
|     | 0.24 | 1         |     | 0.74  | 0.14 | 1 | 0.99  | 0.53  | 1 |
|     | 0.1  | 1 b0178   |     | 0.82  | 0.05 | 1 | 0.58  | 0.32  | 1 |
|     | 0.08 | 1 b0083   |     | 0.86  | 0.11 | 1 | 0.9   | 0.4   | 1 |
| n/a | n/a  |           | n/a | n/a   |      | 0 | n/a   | n/a   | 0 |
|     | 0.13 | 1 b2660   |     | 0.63  | 0.13 | 1 | 1.33  | 0.85  | 1 |
|     | 0.06 | 1 b1598   |     | 1.45  | 0.59 | 0 | 1.3   | 0.4   | 0 |
|     | 0.16 | 1 b3319   |     | 0.26  | 0.06 | 1 | 0.23  | 0.33  | 1 |
|     | 0.17 | 0 b3369   |     | 1.12  | 0.36 | 0 | 1.64  | 0.56  | 0 |
|     | 0.04 | 1 b3411   |     | 1.31  | 0.37 | 0 | 1.78  | 0.41  | 0 |
| n/a | n/a  |           | n/a | n/a   |      | 0 | n/a   | n/a   | 0 |
|     | 0.07 | n/a b3353 |     | 0.8   | 0.42 | 0 | 1.45  | 0.39  | 1 |
|     | 0.08 | 1 b3401   |     | 1.15  | 0.36 | 1 | 1.09  | 0.97  | 0 |
|     | 0.07 | 1         |     | 1.18  | 0.27 | 0 | 1.39  | 0.37  | 1 |
|     | 0.07 | 1         |     | 1.03  | 0.26 | 0 | 1.6   | 0.39  | 0 |
|     | 0.08 | 1 b2062   |     | 1.26  | 0.33 | 0 | 1.22  | 0.93  | 0 |
| n/a | n/a  |           | n/a | n/a   |      | 0 | n/a   | n/a   | 0 |
|     | 0.08 | 1 b3450   |     | 1.23  | 0.53 | 0 | 1.72  | 0.27  | 0 |
|     | 0.06 | 1 b2064   |     | 0.72  | 0.24 | 1 | 0.97  | 0.38  | 1 |
|     | 0.08 | 1         |     | 1.43  | 0.46 | 0 | 1.79  | 0.82  | 0 |
|     | 0.03 | 1         |     | 1.78  | 0.51 | 0 | 1.57  | 0.48  | 0 |
|     | 0.06 | 1         |     | 2.59  | 0.47 | 1 | 3.1   | 1.04  | 1 |
|     | 0.07 | 1 b2056   |     | 1.28  | 0.37 | 0 | 1.87  | 0.63  | 0 |
| n/a | n/a  |           | n/a | n/a   |      | 0 | n/a   | n/a   | 0 |
| n/a | n/a  |           | n/a | n/a   |      | 0 | n/a   | n/a   | 0 |
| n/a | n/a  |           | n/a | n/a   |      | 0 | n/a   | n/a   | 0 |
| n/a | n/a  |           | n/a | n/a   |      | 0 | n/a   | n/a   | 0 |
|     | 0.07 | 1         |     | 1.39  | 0.49 | 0 | 1.55  | 0.81  | 0 |
|     | 0.12 | 1 b0846   |     | 1.29  | 0.46 | 0 | 1.74  | 0.49  | 0 |
| n/a | n/a  |           | n/a | n/a   |      | 0 | n/a   | n/a   | 0 |
| n/a | n/a  |           | n/a | n/a   |      | 0 | n/a   | n/a   | 0 |
|     | 0.1  | 1 b0868   |     | 0.62  | 0.32 | 0 | 1.21  | 0.22  | 0 |
|     | 0.18 | 1 b2530   |     | 0.92  | 0.15 | 1 | 0.64  | 1.09  | 1 |
| n/a | n/a  |           | n/a | n/a   |      | 0 | n/a   | n/a   | 0 |
|     | 0.07 | 1 b2508   |     | 0.38  | 0.15 | 1 | 0.61  | 0.2   | 1 |

|     |          |         |     |      |        |       |      |       |   |
|-----|----------|---------|-----|------|--------|-------|------|-------|---|
|     | 0.12     | 1 b0916 |     | 1.2  | 0.3    | 0     | 1.46 | 2.04  | 0 |
| n/a | n/a      |         | n/a | n/a  |        | 0 n/a | n/a  |       | 0 |
| n/a | n/a      |         | n/a | n/a  |        | 0 n/a | n/a  |       | 0 |
|     | 0.08     | 1 b2723 |     | 1.37 | 0.34   | 0     | 1.82 | 1     | 0 |
|     | 0.07     | 1       |     | 1.47 | 0.56   | 0     | 1.46 | 0.59  | 0 |
|     | 0.11     | 1 b2465 |     | 0.81 | 0.26   | 0     | 0.61 | 0.24  | 1 |
|     | 0.05     | 1       |     | 5.49 | 1.19   | 1     | 4.79 | 16.52 | 1 |
|     | 0.11     | 0 b0919 |     | 1.7  | 0.52   | 0     | 1.54 | 1.19  | 0 |
| n/a | n/a      |         | n/a | n/a  |        | 0 n/a | n/a  |       | 0 |
| n/a | n/a      |         | n/a | n/a  |        | 0 n/a | n/a  |       | 0 |
|     | 0.13     | 1 b4049 |     | 1.14 | 0.26   | 0     | 1.44 | 0.28  | 0 |
|     | 0.11     | 1       |     | 1.55 | 0.4    | 0     | 2.4  | 1.17  | 0 |
|     | 0.11     | 1 b2278 |     | 0.58 | 0.26   | 1     | 1.13 | 0.61  | 1 |
|     | 0.12     | 1       |     | 1.47 | 0.38   | 0     | 2.17 | 0.91  | 0 |
|     | 0.1      | 1 b1002 |     | 2.2  | 0.38   | 1     | 1.67 | 0.61  | 1 |
|     | 0.1      | 1       |     | 2.27 | 0.46   | 0     | 1.71 | 0.86  | 0 |
|     | 0.07     | 1       |     | 1.18 | 0.11   | 1     | 0.85 | 0.35  | 1 |
|     | 0.05     | 1 b0954 |     | 0.36 | 0.12   | 1     | 0.68 | 0.21  | 1 |
|     | 0.08     | 1       |     | 1.33 | 0.99   | 0     | 1.44 | 0.27  | 0 |
|     | 0.16     | 1       |     | 1.3  | 0.4    | 0     | 1.53 | 1.66  | 0 |
|     | 0.11 n/a | b1956   |     | 1.76 | 0.7    | 0     | 1.95 | 0.68  | 0 |
|     | 0.08     | 1       |     | 1.39 | 0.43   | 0     | 1.55 | 0.26  | 0 |
|     | 0.07 n/a |         |     | 1.5  | 0.44   | 0     | 1.77 | 0.53  | 0 |
|     | 0.1      | 1 b1958 |     | 1.35 | 0.27   | 0     | 1.44 | 0.32  | 0 |
|     | 0.11     | 1 b2015 |     | 0.9  | 0.27   | 0     | 1.12 | 0.38  | 0 |
|     | 0.03     | 1       |     | 1.25 | 0.28   | 0     | 1.61 | 9.89  | 0 |
|     | 0.06     | 1       |     | 1.24 | 0.51   | 0     | 1.35 | 0.5   | 0 |
|     | 0.12     | 1       |     | 1.47 | 0.68   | 0     | 1.64 | 0.58  | 0 |
|     | 0.13 n/a | b1086   |     | 0.87 | 0.25   | 0     | 1.26 | 0.74  | 0 |
|     | 0.07     | 1 b1073 |     | 0.63 | 0.21   | 1     | 1.39 | 0.66  | 0 |
|     | 0.23     | 1 b3340 |     | 0.21 | 0.02   | 1     | 0.18 | 0.45  | 1 |
|     | 0.08     | 1       |     | 1.21 | 0.32   | 0     | 1.32 | 0.27  | 0 |
|     | 0.1      | 1       |     | 1.31 | 0.23   | 0     | 1.53 | 1.01  | 0 |
|     | 0.09     | 1       |     | 1.22 | 0.31   | 1     | 0.4  | 1.23  | 1 |
|     | 0.13     | 1       |     | 1.25 | 0.29   | 0     | 1.62 | 0.42  | 0 |
|     | 0.16     | 1 b4013 |     | 0.96 | 0.49   | 0     | 0.88 | 0.47  | 1 |
|     | 0.09     | 1 b0102 |     | 0.56 | 0.22   | 1     | 1.14 | 0.56  | 1 |
|     | 0.08     | 1 b2257 |     | 0.78 | 0.2    | 0     | 1.79 | 0.4   | 0 |
| n/a | n/a      |         | n/a | n/a  |        | 0 n/a | n/a  |       | 0 |
|     | 0.07     | 1 b1650 |     | 1.14 | 0.17   | 1     | 0.79 | 1.48  | 1 |
|     | 0.11     | 1 b0401 |     | 0.8  | 163.76 | 0     | 1.77 | 0.61  | 0 |
|     | 0.09 n/a |         |     | 1.95 | 0.66   | 0     | 1.51 | 0.61  | 0 |
|     | 0.07     | 1 b4033 |     | 1.26 | 0.34   | 0     | 1.45 | 0.36  | 1 |
|     | 0.15     | 1 b0243 |     | 0.96 | 0.45   | 0     | 1.32 | 3.49  | 0 |
|     | 0.13     | 1 b0121 |     | 0.7  | 0.24   | 1     | 0.92 | 0.58  | 1 |
|     | 0.13     | 1       |     | 2.04 | 0.17   | 1     | 1.17 | 1.44  | 1 |
|     | 0.13     | 1 b2388 |     | 1.08 | 0.27   | 0     | 1.83 | 0.66  | 0 |
|     | 0.05     | 1 b2262 |     | 0.69 | 0.22   | 1     | 1.17 | 0.81  | 0 |
|     | 0.12     | 1 b2251 |     | 1.04 | 0.38   | 0     | 1.53 | 0.27  | 0 |
|     | 0.07     | 1 b2533 |     | 0.22 | 0.13   | 1     | 0.37 | 0.3   | 1 |
|     | 0.14     | 1       |     | 1.55 | 0.58   | 0     | 1.71 | 0.84  | 0 |
|     | 0.05     | 1 b0524 |     | 0.52 | 0.19   | 1     | 0.97 | 0.46  | 1 |

|     |          |         |     |      |      |     |      |      |   |
|-----|----------|---------|-----|------|------|-----|------|------|---|
| n/a |          |         | n/a |      | 0    | n/a |      | 0    |   |
| n/a |          |         | n/a |      | 0    | n/a |      | 0    |   |
|     | 0.17     | 1 b4380 |     | 1.84 | 2.05 |     | 1.96 | 1.12 | 0 |
|     | 0.19     | 1 b3608 |     | 0.65 | 0.11 | 1   | 1.1  | 0.23 | 1 |
|     | 0.08     | 1 b3524 |     | 1.12 | 0.58 | 0   | 1.62 | 0.38 | 0 |
|     | 0.08     | 1 b3417 |     | 1.1  | 0.19 | 1   | 1.51 | 0.54 | 1 |
|     | 0.07     | 1       |     | 4.79 | 1.91 | 1   | 2.01 | 0.64 | 0 |
|     | 0.12     | 1       |     | 0.64 | 0.1  | 1   | 1.13 | 0.88 | 0 |
|     | 0.08     | 1 b0889 |     | 1.37 | 0.27 | 1   | 0.92 | 1.16 | 1 |
|     | 0.08     | 1 b0577 |     | 0.77 | 0.4  | 0   | 0.91 | 4.56 | 0 |
|     | 0.11     | 1 b4234 |     | 0.66 | 0.18 | 1   | 0.99 | 0.53 | 1 |
|     | 0.13 n/a |         |     | 0.93 | 0.16 | 1   | 1.11 | 0.98 | 0 |
|     | 0.19     | 1 b3643 |     | 0.47 | 0.56 | 0   | 1.23 | 0.55 | 1 |
|     | 0.08     | 1 b3068 |     | 1.25 | 0.27 | 0   | 1.73 | 6.25 | 0 |
|     | 0.17     | 1       |     | 1.46 | 0.54 | 0   | 1.64 | 0.84 | 0 |
|     | 0.14     | 1 b3644 |     | 0.59 | 0.15 | 1   | 1.07 | 0.49 | 0 |
|     | 0.19 n/a |         |     | 1.66 | 0.33 | 0   | 2.12 | 0.96 | 0 |
|     | 0.07     | 1 b0078 |     | 1.07 | 0.36 | 0   | 1.69 | 0.71 | 1 |
|     | 0.17     | 1       |     | 0.89 | 0.18 | 0   | 0.94 | 4.13 | 0 |
|     | 0.09     | 1 b0726 |     | 0.81 | 0.29 | 1   | 0.39 | 6.17 | 1 |
|     | 0.12     | 1 b4120 |     | 1.26 | 0.26 | 0   | 1.49 | 0.4  | 0 |
|     | 0.1      | 1 b2608 |     | 0.55 | 0.1  | 1   | 0.23 | 0.14 | 1 |
|     | 0.06     | 1       |     | 1.73 | 0.51 | 0   | 1.84 | 0.49 | 0 |
|     | 0.11     | 1 b2020 |     | 1.24 | 0.48 | 0   | 1.36 | 0.37 | 0 |
|     | 0.13     | 1 b0241 |     | 1.37 | 0.41 | 0   | 1.45 | 0.26 | 0 |
|     | 0.08     | 1 b0480 |     | 0.82 | 0.12 | 1   | 0.92 | 0.27 | 1 |
|     | 0.1      | 1 b0945 |     | 0.43 | 0.32 | 1   | 0.53 | 0.48 | 1 |
|     | 0.13     | 1       |     | 1.29 | 0.72 | 1   | 0.96 | 0.89 | 1 |
|     | 0.13     | 1 b3917 |     | 1.32 | 0.25 | 0   | 1.61 | 0.83 | 0 |
|     | 0.13     | 1 b0659 |     | 0.5  | 0.33 | 0   | 0.96 | 0.11 | 1 |
|     | 0.09     | 1       |     | 1.32 | 0.29 | 0   | 1.6  | 0.53 | 0 |
|     | 0.14     | 1       |     | 1.45 | 0.48 | 0   | 1.9  | 1.07 | 0 |
|     | 0.13     | 1       |     | 1.35 | 0.4  | 0   | 1.77 | 0.44 | 0 |
|     | 0.08     | 1 b1917 |     | 1.29 | 0.33 | 0   | 1.49 | 0.6  | 0 |
|     | 0.08     | 1       |     | 1.37 | 0.19 | 0   | 1.27 | 0.63 | 0 |
|     | 0.15 n/a |         |     | 1.67 | 0.44 | 0   | 1.68 | 0.78 | 0 |
|     | 0.11     | 1       |     | 1.42 | 0.82 | 0   | 1.54 | 0.19 | 0 |
|     | 0.13 n/a |         |     | 2.19 | 0.57 | 0   | 1.95 | 1.12 | 0 |
|     | 0.07     | 1 b4006 |     | 0.77 | 0.09 | 1   | 1.05 | 3.73 | 1 |
|     | 0.09     | 1 b2523 |     | 0.87 | 0.12 | 1   | 0.54 | 1.37 | 1 |
|     | 0.17     | 1       |     | 1.46 | 0.44 | 0   | 2.74 | 1.56 | 0 |
|     | 0.07     | 1       |     | 1.17 | 0.18 | 0   | 1.43 | 0.46 | 0 |
|     | 0.06     | 1       |     | 1.55 | 0.32 | 0   | 2.14 | 0.48 | 0 |
|     | 0.1      | 1 b1093 |     | 0.51 | 0.09 | 1   | 0.48 | 0.47 | 1 |
|     | 0.08     | 1       |     | 1.33 | 0.4  | 0   | 1.2  | 0.5  | 1 |
|     | 0.09     | 1 b2599 |     | 1.16 | 0.32 | 1   | 0.9  | 0.91 | 1 |
|     | 0.12     | 1 b0006 |     | 2.31 | 0.83 | 1   | 2.22 | 2.16 | 1 |
|     | 0.2      | 1       |     | 1.84 | 0.69 | 0   | 2    | 0.41 | 0 |
|     | 0.08     | 0       |     | 1.3  | 0.57 | 0   | 1.37 | 0.69 | 0 |
|     | 0.19     | 0 b3894 |     | 1.24 | 0.21 | 1   | 1.87 | 3.07 | 1 |
|     | 0.19     | 1 b3832 |     | 1.08 | 0.13 | 1   | 1.31 | 0.41 | 1 |
|     | 0.12     | 1 b3803 |     | 1.03 | 0.1  | 1   | 0.57 | 2.44 | 1 |

|      |     |       |      |      |   |      |       |   |
|------|-----|-------|------|------|---|------|-------|---|
| 0.14 | 1   | b2925 | 0.75 | 0.08 | 1 | 0.47 | 5.52  | 1 |
| 0.12 | 1   | b1945 | 1.16 | 0.3  | 0 | 1.06 | 0.21  | 0 |
| 0.12 | n/a |       | 1.21 | 0.4  | 0 | 1.33 | 0.46  | 0 |
| 0.08 | 1   |       | 1.53 | 0.26 | 0 | 1.39 | 0.4   | 0 |
| 0.1  | 1   | b3169 | 0.73 | 0.19 | 1 | 0.33 | 1.06  | 1 |
| 0.1  | 1   | b2796 | 0.41 | 0.07 | 1 | 0.25 | 0.34  | 1 |
| 0.03 | 1   |       | 1.23 | 0.37 | 0 | 1.49 | 0.8   | 0 |
| 0.08 | 1   | b3839 | 0.84 | 0.46 | 0 | 1.07 | 0.44  | 1 |
| 0.1  | 1   | b3822 | 0.83 | 6.84 | 1 | 0.99 | 0.41  | 1 |
| 0.16 | 1   | b3820 | 0.58 | 0.24 | 0 | 1.3  | 51.43 | 0 |
| 0.16 | 1   | b0475 | 8.32 | 3.01 | 1 | 1.83 | 1.6   | 1 |
| 0.12 | n/a | b3980 | 0.53 | 0.15 | 1 | 0.21 | 1.01  | 1 |
| 0.09 | 1   | b1939 | 0.74 | 0.52 | 0 | 0.74 | 0.8   | 1 |
| 0.11 | 1   |       | 1.24 | 0.17 | 0 | 1.58 | 0.31  | 0 |
| 0.15 | 1   | b2825 | 1.14 | 0.38 | 0 | 1.34 | 0.5   | 1 |
| 0.12 | 1   |       | 1.34 | 0.22 | 1 | 1.93 | 1.03  | 0 |
| 0.1  | 1   | b0489 | 1.54 | 0.11 | 1 | 1.59 | 0.48  | 0 |
| 0.06 | 1   | b0515 | 1.23 | 0.07 | 1 | 1.56 | 0.91  | 0 |
| n/a  | n/a |       | n/a  | n/a  | 0 | n/a  | n/a   | 0 |
| 0.05 | 1   |       | 1.09 | 0.5  | 0 | 2.2  | 0.93  | 0 |
| 0.11 | 1   | b1277 | 1.89 | 0.36 | 1 | 2.21 | 1.81  | 1 |
| 0.04 | 1   | b1227 | 3.17 | 1.01 | 1 | 1.74 | 0.48  | 0 |
| 0.06 | 1   | b1191 | 0.82 | 0.22 | 1 | 1.69 | 0.51  | 1 |
| 0.06 | 1   | b1821 | 1.03 | 0.31 | 0 | 1.82 | 0.44  | 0 |
| 0.08 | 1   |       | 1.57 | 0.53 | 0 | 1.88 | 0.51  | 0 |
| 0.17 | 1   |       | 1.29 | 0.15 | 0 | 1.64 | 0.88  | 0 |
| 0.04 | 1   | b0477 | 0.69 | 0.22 | 1 | 0.9  | 0.51  | 1 |
| 0.14 | 1   |       | 0.97 | 0.42 | 0 | 1.18 | 0.59  | 0 |
| 0.1  | 1   | b1526 | 1.14 | 0.97 | 0 | 1.62 | 4.24  | 0 |
| 0.09 | 1   | b0903 | 1.55 | 0.24 | 1 | 0.9  | 2.08  | 1 |
| 0.1  | 1   |       | 1.25 | 0.21 | 0 | 1.68 | 0.93  | 0 |
| 0.09 | 1   |       | 1.14 | 0.26 | 0 | 1.59 | 0.64  | 0 |
| 0.12 | 1   |       | 1.07 | 0.32 | 0 | 1.27 | 0.18  | 0 |
| 0.14 | 1   | b3500 | 1.53 | 0.15 | 1 | 1.16 | 1.15  | 1 |
| 0.11 | 1   |       | 1.41 | 0.19 | 1 | 2.79 | 4.96  | 1 |
| n/a  | n/a |       | n/a  | n/a  | 0 | n/a  | n/a   | 0 |
| 0.1  | 1   |       | 0.56 | 0.24 | 1 | 0.79 | 0.31  | 1 |
| 0.09 | 1   | b2784 | 1.25 | 0.21 | 1 | 1.3  | 1.07  | 1 |
| 0.05 | 1   |       | 1.06 | 0.28 | 1 | 1.18 | 0.25  | 1 |
| 0.11 | n/a |       | 1.11 | 0.04 | 0 | 1.13 | 0.42  | 0 |
| 0.15 | n/a |       | 1.61 | 0.6  | 0 | 1.42 | 0.84  | 0 |
| 0.05 | 1   | b0451 | 1.29 | 0.34 | 0 | 1.7  | 0.47  | 0 |
| n/a  | n/a |       | n/a  | n/a  | 0 | n/a  | n/a   | 0 |
| 0.09 | 1   | b3564 | 1.28 | 0.25 | 1 | 1.11 | 0.44  | 1 |
| 0.06 | n/a |       | 1.54 | 0.52 | 0 | 1.57 | 0.72  | 0 |
| 0.29 | 0   | b4199 | 1.51 | 0.2  | 0 | 1.63 | 0.39  | 0 |
| 0.19 | 1   | b0388 | 1.07 | 0.24 | 0 | 1.4  | 0.77  | 0 |
| 0.12 | 1   | b0419 | 2.04 | 0.36 | 1 | 1.72 | 1.34  | 0 |
| 0.16 | n/a | b3008 | 1.28 | 0.32 | 1 | 1.35 | 0.12  | 1 |
| 0.18 | 1   | b2719 | 1.51 | 0.42 | 0 | 1.33 | 0.56  | 0 |
| 0.14 | 1   | b3571 | 1.33 | 0.54 | 0 | 1.75 | 0.73  | 0 |
| 0.15 | 1   | b3221 | 1.59 | 0.9  | 0 | 1.76 | 0.61  | 0 |

|      |     |       |      |      |   |      |      |   |
|------|-----|-------|------|------|---|------|------|---|
| 0.17 | 1   | b3146 | 0.77 | 0.22 | 0 | 1.59 | 0.54 | 0 |
| 0.11 | 1   | b3002 | 0.97 | 0.15 | 0 | 1.1  | 0.42 | 0 |
| 0.1  | 1   |       | 1.33 | 0.37 | 0 | 1.73 | 0.37 | 0 |
| 0.1  | 1   | b2672 | 1.71 | 0.47 | 0 | 2.52 | 1.09 | 0 |
| 0.06 | 1   | b2157 | 1.49 | 0.44 | 0 | 1.68 | 1.01 | 0 |
| 0.15 | n/a | b0374 | 1.68 | 0.51 | 0 | 1.7  | 0.35 | 0 |
| 0.09 | 1   |       | 1.38 | 0.18 | 0 | 2.05 | 1.57 | 0 |
| 0.14 | 0   |       | 1.77 | 1.16 | 0 | 1.67 | 0.57 | 0 |
| 0.1  | 1   | b2097 | 1.56 | 0.16 | 0 | 1.39 | 0.54 | 0 |
| 0.11 | 1   | b2140 | 1.38 | 0.3  | 0 | 1.48 | 0.43 | 0 |
| 0.18 | 1   | b3297 | 0.35 | 0.09 | 1 | 0.22 | 0.63 | 1 |
| 0.09 | 1   | b2052 | 1.17 | 0.49 | 0 | 1.91 | 0.37 | 0 |
| 0.13 | 1   |       | 0.57 | 0.46 | 0 | 0.85 | 1.85 | 1 |
| 0.36 | 1   | b0213 | 1.1  | 0.25 | 1 | 1.6  | 0.76 | 0 |
| 0.17 | 1   | b3538 | 1.24 | 0.24 | 0 | 1.43 | 0.37 | 0 |
| 0.16 | 1   | b3441 | 1.61 | 0.34 | 0 | 1.97 | 0.76 | 0 |
| 0.13 | 1   | b3189 | 0.57 | 0.08 | 1 | 0.92 | 0.79 | 1 |
| 0.2  | 1   | b4195 | 1.32 | 0.26 | 0 | 1.52 | 0.84 | 0 |
| 0.11 | 1   | b4252 | 1.26 | 0.13 | 0 | 1.7  | 0.39 | 0 |
| 0.14 | 1   |       | 0.83 | 0.18 | 1 | 1.09 | 0.15 | 1 |
| 0.16 | 1   | b3648 | 0.67 | 0.4  | 1 | 0.77 | 0.38 | 1 |
| 0.16 | 1   | b3180 | 0.97 | 0.19 | 1 | 1.14 | 0.65 | 1 |
| 0.1  | 1   | b3097 | 0.69 | 0.11 | 1 | 0.83 | 0.38 | 1 |
| 0.13 | 1   |       | 0.88 | 0.48 | 0 | 1.3  | 0.19 | 0 |
| 0.12 | 1   |       | 1.16 | 0.12 | 0 | 1.38 | 0.52 | 0 |
| 0.07 | 1   | b3089 | 1.31 | 0.15 | 0 | 1.59 | 0.43 | 0 |
| 0.09 | 1   |       | 0.49 | 0.22 | 1 | 0.85 | 0.3  | 1 |
| 0.07 | 1   | b0125 | 0.28 | 0.1  | 1 | 0.59 | 0.21 | 1 |
| 0.05 | 1   |       | 1.58 | 0.5  | 0 | 1.39 | 0.26 | 0 |
| 0.13 | 1   | b4155 | 0.73 | 0.26 | 0 | 1.26 | 0.35 | 1 |
| 0.09 | 1   |       | 1.39 | 0.66 | 0 | 1.63 | 0.53 | 0 |
| 0.06 | 1   | b1529 | 0.69 | 0.26 | 1 | 1.12 | 1.21 | 1 |
| n/a  | n/a |       | n/a  | n/a  | 0 | n/a  | n/a  | 0 |
| 0.07 | 1   | b0787 | 1.39 | 0.46 | 0 | 1.65 | 0.43 | 0 |
| n/a  | n/a |       | n/a  | n/a  | 0 | n/a  | n/a  | 0 |
| n/a  | n/a |       | n/a  | n/a  | 0 | n/a  | n/a  | 0 |
| n/a  | n/a |       | n/a  | n/a  | 0 | n/a  | n/a  | 0 |
| 0.08 | 1   |       | 1.16 | 0.25 | 0 | 1.46 | 0.42 | 0 |
| 0.21 | 1   | b2792 | 0.53 | 0.21 | 1 | 1.22 | 0.61 | 1 |
| 0.11 | n/a | b2940 | 0.44 | 0.09 | 1 | 1.12 | 1.61 | 0 |
| n/a  | n/a |       | n/a  | n/a  | 0 | n/a  | n/a  | 0 |
| 0.08 | 1   |       | 1.37 | 0.54 | 0 | 1.76 | 0.41 | 0 |
| n/a  | n/a |       | n/a  | n/a  | 0 | n/a  | n/a  | 0 |
| 0.17 | 1   | b4068 | 0.43 | 0.06 | 1 | 1.36 | 0.47 | 0 |
| n/a  | n/a |       | n/a  | n/a  | 0 | n/a  | n/a  | 0 |
| 0.27 | 1   | b3302 | 0.44 | 0.05 | 1 | 0.43 | 0.49 | 1 |
| n/a  | n/a |       | n/a  | n/a  | 0 | n/a  | n/a  | 0 |
| 0.1  | 1   |       | 1.08 | 0.3  | 0 | 1.38 | 0.74 | 0 |
| 0.12 | 1   | b1481 | 37.8 | 12   | 1 | 7.85 | 7.01 | 1 |
| 0.11 | n/a |       | 1.95 | 0.28 | 0 | 1.64 | 0.52 | 0 |
| 0.17 | 1   |       | 1.31 | 0.44 | 0 | 1.89 | 0.47 | 0 |
| 0.07 | 1   | b0884 | 0.42 | 0.07 | 1 | 0.61 | 0.38 | 1 |





|     |      |     |       |      |      |   |      |      |   |
|-----|------|-----|-------|------|------|---|------|------|---|
|     | 0.14 | 1   |       | 1.5  | 0.58 | 0 | 2.01 | 0.59 | 0 |
|     | 0.11 | 1   |       | 1.51 | 0.39 | 0 | 1.19 | 0.85 | 0 |
|     | 0.04 | 1   |       | 1.51 | 0.25 | 0 | 1.68 | 0.52 | 0 |
|     | 0.1  | 1   |       | 1.9  | 0.72 | 0 | 1.89 | 0.66 | 0 |
|     | 0.1  | 1   |       | 0.9  | 0.35 | 0 | 1.38 | 0.15 | 0 |
|     | 0.09 | 1   |       | 1.15 | 0.2  | 0 | 1.65 | 0.39 | 0 |
|     | 0.09 | 1   |       | 1.31 | 0.21 | 1 | 1.45 | 0.31 | 0 |
|     | 0.06 | 1   |       | 1.43 | 0.53 | 0 | 1.71 | 0.67 | 0 |
|     | 0.12 | 1   |       | 1.11 | 0.21 | 0 | 1.36 | 0.41 | 0 |
|     | 0.06 | n/a |       | 1.18 | 0.39 | 0 | 1.45 | 0.42 | 0 |
| n/a | n/a  |     | n/a   | n/a  |      | 0 | n/a  | n/a  | 0 |
| n/a | n/a  |     | n/a   | n/a  |      | 0 | n/a  | n/a  | 0 |
| n/a | n/a  |     | n/a   | n/a  |      | 0 | n/a  | n/a  | 0 |
| n/a | n/a  |     | n/a   | n/a  |      | 0 | n/a  | n/a  | 0 |
| n/a | n/a  |     | n/a   | n/a  |      | 0 | n/a  | n/a  | 0 |
|     | 0.19 | 0   | b1207 | 1.49 | 0.29 | 0 | 1.96 | 0.68 | 0 |
|     | 0.15 | 1   | b0066 | 0.98 | 0.14 | 0 | 1.03 | 1.01 | 1 |
|     | 0.12 | 1   | b3224 | 1.77 | 0.33 | 1 | 1.34 | 0.78 | 0 |
|     | 0.1  | 1   | b3249 | 0.83 | 0.17 | 1 | 1.29 | 1.36 | 0 |
|     | 0.11 | 1   | b0167 | 1.09 | 0.26 | 1 | 0.95 | 0.49 | 1 |
|     | 0.07 | 1   | b0676 | 3.67 | 0.91 | 1 | 4.03 | 1.82 | 1 |
|     | 0.08 | n/a | b3265 | 1.78 | 0.48 | 0 | 1.47 | 0.6  | 0 |
|     | 0.07 | 1   | b0187 | 1.47 | 0.32 | 0 | 1.54 | 0.46 | 0 |
|     | 0.07 | n/a | b1536 | 1.77 | 0.42 | 0 | 1.22 | 0.75 | 0 |
|     | 0.08 | 1   | b1928 | 1.59 | 0.22 | 0 | 1.35 | 0.76 | 0 |
|     | 0.15 | 1   | b3619 | 1.34 | 0.13 | 1 | 0.63 | 0.17 | 1 |
|     | 0.03 | 1   |       | 1.2  | 0.23 | 0 | 1.74 | 0.67 | 0 |
|     | 0.05 | 1   | b1927 | 1.5  | 0.31 | 0 | 1.25 | 0.26 | 0 |
|     | 0.14 | 1   |       | 1.55 | 0.38 | 0 | 1.75 | 0.77 | 0 |
|     | 0.08 | 1   |       | 1.55 | 0.52 | 0 | 0.95 | 0.23 | 1 |
|     | 0.15 | 1   | b0026 | 0.49 | 0.08 | 1 | 0.36 | 0.1  | 1 |
|     | 0.16 | 0   |       | 1.61 | 0.6  | 0 | 1.32 | 5.83 | 0 |
|     | 0.11 | 1   | b3193 | 0.79 | 0.49 | 0 | 0.62 | 0.45 | 1 |
| n/a | n/a  |     | n/a   | n/a  |      | 0 | n/a  | n/a  | 0 |
|     | 0.12 | 0   | b0953 | 1.53 | 0.38 | 1 | 1.25 | 0.9  | 1 |
|     | 0.11 | 1   |       | 1.86 | 0.5  | 0 | 1.46 | 0.24 | 0 |
|     | 0.04 | 1   | b1049 | 0.7  | 0.21 | 1 | 0.91 | 0.23 | 1 |
|     | 0.05 | 1   | b1098 | 0.91 | 0.1  | 1 | 1.05 | 0.53 | 1 |
|     | 0.06 | 1   | b1119 | 1.33 | 0.13 | 1 | 1.2  | 0.49 | 0 |
|     | 0.11 | 1   |       | 1.52 | 0.5  | 1 | 1.48 | 4.4  | 1 |
|     | 0.02 | 1   | b1084 | 0.63 | 0.23 | 1 | 0.27 | 0.11 | 1 |
|     | 0.09 | 1   | b1110 | 1.1  | 0.3  | 0 | 1.14 | 0.25 | 0 |
| n/a | n/a  |     | n/a   | n/a  |      | 0 | n/a  | n/a  | 0 |
|     | 0.06 | 1   | b3465 | 1.03 | 0.2  | 0 | 1.28 | 0.4  | 1 |
|     | 0.13 | 1   |       | 2.79 | 0.67 | 1 | 2.64 | 1.38 | 1 |
|     | 0.13 | 1   |       | 1.03 | 0.23 | 0 | 1.29 | 2.19 | 1 |
|     | 0.08 | 1   | b1780 | 1.01 | 0.27 | 0 | 0.94 | 0.24 | 1 |
| n/a | n/a  |     | n/a   | n/a  |      | 0 | n/a  | n/a  | 0 |
|     | 0.08 | 1   | b0002 | 1.3  | 0.3  | 0 | 1.05 | 0.26 | 1 |
| n/a | n/a  |     | n/a   | n/a  |      | 0 | n/a  | n/a  | 0 |
| n/a | n/a  |     | n/a   | n/a  |      | 0 | n/a  | n/a  | 0 |
|     | 0.07 | 1   |       | 1.08 | 0.41 | 0 | 1.3  | 0.45 | 1 |

|     |      |         |     |       |      |   |      |      |   |
|-----|------|---------|-----|-------|------|---|------|------|---|
|     | 0.1  | 1       |     | 1.14  | 0.33 | 0 | 1.04 | 2.66 | 0 |
|     | 0.06 | n/a     |     | 1.6   | 0.52 | 0 | 1.1  | 0.93 | 0 |
| n/a | n/a  |         | n/a | n/a   |      | 0 | n/a  | n/a  | 0 |
|     | 0.08 | 1       |     | 1.06  | 0.59 | 0 | 0.96 | 0.23 | 1 |
|     | 0.07 | 1       |     | 1.41  | 0.67 | 0 | 1.86 | 0.21 | 0 |
|     | 0.09 | 1 b2342 |     | 0.97  | 0.48 | 0 | 1.22 | 0.62 | 0 |
|     | 0.11 | 1 b2410 |     | 1.12  | 0.36 | 0 | 1.55 | 0.46 | 0 |
|     | 0.08 | 1       |     | 1.29  | 0.17 | 0 | 1.33 | 0.35 | 0 |
|     | 0.11 | 1       |     | 1.6   | 0.49 | 0 | 1.05 | 0.91 | 1 |
|     | 0.05 | 1 b0911 |     | 0.23  | 0.05 | 1 | 0.1  | 0.03 | 1 |
|     | 0.08 | 1       |     | 1.24  | 0.7  | 0 | 1.25 | 0.25 | 0 |
|     | 0.12 | 1 b0885 |     | 1.24  | 0.26 | 0 | 1.53 | 0.32 | 0 |
|     | 0.07 | 1 b2556 |     | 1.4   | 0.29 | 0 | 1.19 | 0.35 | 0 |
|     | 0.17 | 0       |     | 0.99  | 0.19 | 0 | 1.8  | 0.5  | 0 |
|     | 0.11 | 0 b3946 |     | 1.61  | 0.22 | 0 | 1.36 | 0.4  | 0 |
|     | 0.16 | 0       |     | 0.83  | 0.35 | 0 | 1.17 | 0.3  | 1 |
|     | 0.09 | 0 b4140 |     | 1.44  | 0.58 | 0 | 2.32 | 0.8  | 0 |
|     | 0.07 | 1 b2476 |     | 0.64  | 0.41 | 1 | 0.91 | 0.26 | 1 |
|     | 0.12 | 1 b2522 |     | 0.61  | 0.09 | 1 | 0.5  | 0.52 | 1 |
|     | 0.06 | 1       |     | 1.16  | 0.34 | 0 | 1.43 | 0.49 | 0 |
|     | 0.22 | 1       |     | 2.15  | 0.45 | 1 | 1.65 | 0.37 | 0 |
|     | 0.06 | 1 b3926 |     | 1.82  | 0.39 | 1 | 0.79 | 1.17 | 1 |
|     | 0.17 | 1 b3959 |     | 1.44  | 0.29 | 0 | 1.42 | 0.7  | 0 |
|     | 0.13 | 1 b2241 |     | 3.73  | 1.19 | 1 | 1.58 | 1.13 | 1 |
| n/a | n/a  |         | n/a | n/a   |      | 0 | n/a  | n/a  | 0 |
|     | 0.13 | 1 b4350 |     | 1.59  | 0.62 | 0 | 1.14 | 0.27 | 0 |
|     | 0.07 | 1 b1889 |     | 1.58  | 0.68 | 0 | 1.23 | 0.4  | 0 |
|     | 0.11 | 1 b1726 |     | 2.15  | 0.44 | 1 | 1.15 | 0.3  | 1 |
|     | 0.12 | 1 b0334 |     | 1.15  | 0.11 | 0 | 1.28 | 0.42 | 0 |
|     | 0.09 | 1 b4043 |     | 8.33  | 1.56 | 1 | 3.96 | 1.74 | 1 |
|     | 0.15 | 1       |     | 21.92 | 3.96 | 1 | 7.08 | 3.35 | 1 |
|     | 0.06 | 0 b1641 |     | 0.76  | 0.1  | 1 | 0.85 | 0.21 | 1 |
|     | 0.09 | 1       |     | 1.21  | 0.23 | 0 | 1.31 | 0.59 | 0 |
| n/a | n/a  |         | n/a | n/a   |      | 0 | n/a  | n/a  | 0 |
|     | 0.08 | 1       |     | 1.45  | 0.27 | 0 | 1.85 | 0.69 | 0 |
|     | 0.12 | 1       |     | 1.45  | 0.22 | 1 | 1.12 | 0.74 | 1 |
| n/a | n/a  |         | n/a | n/a   |      | 0 | n/a  | n/a  | 0 |
|     | 0.12 | 1 b4240 |     | 0.74  | 0.07 | 1 | 0.55 | 0.41 | 1 |
| n/a | n/a  |         | n/a | n/a   |      | 0 | n/a  | n/a  | 0 |
| n/a | n/a  |         | n/a | n/a   |      | 0 | n/a  | n/a  | 0 |
|     | 0.07 | 1       |     | 1.78  | 0.33 | 0 | 1.38 | 0.42 | 0 |
|     | 0.14 | 1       |     | 1.25  | 0.3  | 0 | 1.21 | 0.73 | 0 |
|     | 0.11 | 1       |     | 1.06  | 0.27 | 0 | 1.12 | 0.47 | 0 |
|     | 0.12 | 1       |     | 1.2   | 0.35 | 0 | 1.1  | 0.3  | 0 |
|     | 0.07 | 1       |     | 1.46  | 0.74 | 0 | 1.63 | 0.6  | 0 |
|     | 0.07 | 1 b0043 |     | 1.5   | 0.2  | 0 | 1.5  | 0.54 | 1 |
|     | 0.09 | 1 b0113 |     | 1.23  | 0.16 | 0 | 0.89 | 0.16 | 1 |
|     | 0.1  | 1       |     | 2.27  | 0.31 | 1 | 1.45 | 0.29 | 1 |
|     | 0.09 | 1 b2289 |     | 1.39  | 0.55 | 0 | 1.26 | 0.7  | 0 |
|     | 0.07 | 1 b1709 |     | 1.07  | 0.38 | 1 | 1.03 | 1.12 | 1 |
|     | 0.13 | 1 b0841 |     | 1.17  | 0.22 | 1 | 1.35 | 0.23 | 0 |
|     | 0.1  | 1 b1628 |     | 1.13  | 0.47 | 0 | 1.41 | 1.41 | 0 |

|      |     |       |      |        |   |      |      |   |
|------|-----|-------|------|--------|---|------|------|---|
| 0.06 | 1   | b1587 | 1.66 | 0.37   | 0 | 1.51 | 0.34 | 0 |
| 0.04 | 1   | b1585 | 1.22 | 0.23   | 0 | 1.22 | 0.41 | 0 |
| 0.06 | 1   |       | 1.7  | 0.36   | 0 | 1.52 | 1    | 0 |
| 0.04 | 1   |       | 1.24 | 0.33   | 0 | 1.33 | 1.03 | 0 |
| 0.11 | 1   | b0405 | 0.77 | 0.2    | 1 | 0.97 | 0.4  | 1 |
| 0.11 | 1   |       | 0.6  | 0.13   | 1 | 0.58 | 0.15 | 1 |
| 0.08 | 1   | b2318 | 0.73 | 0.2    | 1 | 0.99 | 0.66 | 1 |
| 0.06 | n/a |       | 1.78 | 0.72   | 0 | 1.3  | 0.57 | 0 |
| 0.1  | 1   |       | 1.4  | 0.39   | 0 | 1.2  | 0.35 | 1 |
| 0.03 | 1   | b0448 | 1.67 | 0.31   | 1 | 1.45 | 0.6  | 1 |
| 0.07 | 1   |       | 1.4  | 0.43   | 0 | 1.4  | 0.39 | 0 |
| 0.08 | 0   |       | 1.69 | 0.42   | 0 | 1.53 | 0.48 | 0 |
| 0.1  | 1   | b4219 | 1.61 | 0.25   | 1 | 1.69 | 0.52 | 0 |
| 0.09 | 1   | b4259 | 0.71 | 0.44   | 1 | 0.63 | 0.19 | 1 |
| 0.07 | 1   | b2581 | 1.19 | 0.14   | 0 | 1.19 | 0.34 | 1 |
| 0.09 | 1   | b3051 | 1.25 | 0.46   | 0 | 1.2  | 0.67 | 0 |
| 0.1  | 1   | b3114 | 1.55 | 0.25   | 0 | 1.66 | 0.74 | 0 |
| 0.07 | 1   | b3158 | 1.33 | 0.45   | 0 | 1.34 | 1.5  | 0 |
| 0.19 | 0   | b3938 | 1.46 | 0.56   | 0 | 1.29 | 0.58 | 0 |
| 0.11 | n/a |       | 1.62 | 0.31   | 0 | 1.91 | 0.7  | 0 |
| 0.12 | 1   | b0458 | 1.2  | 0.47   | 0 | 1.17 | 0.56 | 1 |
| 0.12 | 1   | b2661 | 1.11 | 0.41   | 0 | 1.39 | 0.39 | 0 |
| n/a  | n/a |       | n/a  | n/a    | 0 | n/a  | n/a  | 0 |
| 0.08 | 1   | b2572 | 6.72 | 1.07   | 1 | 5.35 | 5.07 | 1 |
| 0.07 | n/a |       | 1.47 | 110.62 | 0 | 1.25 | 0.16 | 0 |
| 0.07 | 1   | b3533 | 0.91 | 0.23   | 1 | 0.98 | 0.29 | 1 |
| 0.1  | 1   | b3153 | 1.44 | 0.18   | 0 | 1.81 | 0.7  | 0 |
| 0.07 | 1   |       | 1.77 | 0.72   | 0 | 1.31 | 0.99 | 0 |
| 0.05 | 1   | b2499 | 0.66 | 0.09   | 1 | 0.92 | 0.32 | 1 |
| 0.03 | 1   | b1015 | 0.43 | 0.12   | 1 | 0.64 | 0.18 | 1 |
| 0.05 | 1   | b2676 | 1.73 | 0.42   | 0 | 1.46 | 0.53 | 0 |
| 0.03 | 1   |       | 1.56 | 0.29   | 0 | 1.56 | 0.7  | 0 |
| 0.11 | 1   |       | 1.03 | 0.29   | 0 | 0.45 | 0.17 | 1 |
| 0.07 | 1   | b3404 | 0.47 | 0.23   | 1 | 0.6  | 0.14 | 1 |
| 0.07 | 1   | b1292 | 1.14 | 0.25   | 0 | 1.86 | 0.48 | 0 |
| 0.15 | 1   | b3904 | 1.65 | 0.32   | 0 | 1.6  | 0.96 | 0 |
| 0.12 | 1   |       | 1.04 | 0.23   | 0 | 0.91 | 0.43 | 1 |
| 0.04 | 1   |       | 1.97 | 0.91   | 0 | 1.63 | 0.37 | 0 |
| 0.08 | 1   | b1062 | 0.29 | 0.06   | 1 | 0.54 | 0.7  | 1 |
| 0.04 | 1   | b3361 | 1.03 | 0.4    | 0 | 1.61 | 0.33 | 0 |
| 0.14 | 1   | b3895 | 1.26 | 0.62   | 0 | 1.44 | 0.32 | 0 |
| 0.09 | 1   | b0635 | 1.29 | 0.49   | 0 | 1.45 | 0.46 | 0 |
| 0.01 | 1   | b0208 | 1.39 | 0.24   | 0 | 1.05 | 1.41 | 1 |
| 0.04 | n/a | b1629 | 0.97 | 0.24   | 0 | 0.9  | 0.53 | 1 |
| 0.12 | 1   |       | 0.61 | 0.32   | 1 | 0.6  | 0.26 | 1 |
| 0.04 | 1   | b1070 | 1.43 | 0.28   | 0 | 1.55 | 0.59 | 0 |
| 0.15 | 1   | b4058 | 1.71 | 0.58   | 1 | 1.63 | 0.57 | 1 |
| 0.16 | 1   | b2620 | 0.83 | 0.12   | 1 | 0.88 | 0.24 | 1 |
| 0.07 | 1   |       | 1.52 | 0.41   | 0 | 2.05 | 1.1  | 0 |
| 0.09 | 1   |       | 0.73 | 0.25   | 1 | 0.56 | 0.08 | 1 |
| 0.39 | 0   |       | 1.67 | 0.41   | 0 | 1.33 | 0.34 | 0 |
| 0.17 | 1   | b3732 | 0.38 | 0.06   | 1 | 0.13 | 0.04 | 1 |

|      |     |       |      |      |   |      |       |   |
|------|-----|-------|------|------|---|------|-------|---|
| 0.09 | 1   | b0397 | 0.96 | 0.35 | 0 | 0.76 | 0.32  | 1 |
| 0.18 | 0   |       | 1.32 | 0.84 | 0 | 1.81 | 0.44  | 0 |
| 0.12 | 1   |       | 1.59 | 0.46 | 1 | 1.16 | 2.53  | 0 |
| 0.07 | 1   |       | 1.99 | 0.18 | 1 | 1.46 | 0.28  | 1 |
| 0.06 | 1   | b1279 | 1.27 | 0.24 | 0 | 0.87 | 0.58  | 1 |
| 0.12 | 1   |       | 1.94 | 0.55 | 0 | 1.68 | 0.4   | 0 |
| 0.11 | 1   | b3631 | 0.79 | 0.06 | 1 | 0.54 | 0.46  | 1 |
| 0.13 | 0   |       | 1.45 | 0.45 | 0 | 1.93 | 0.73  | 0 |
| 0.09 | n/a | b3992 | 1.25 | 0.61 | 0 | 1.68 | 1     | 0 |
| 0.05 | 1   | b3849 | 0.91 | 0.17 | 1 | 0.91 | 2.05  | 1 |
| 0.04 | 1   | b2514 | 0.51 | 0.5  | 1 | 0.61 | 0.27  | 1 |
| 0.13 | 1   | b3790 | 1.25 | 0.08 | 1 | 0.8  | 0.26  | 1 |
| 0.1  | 1   | b3772 | 1.08 | 0.18 | 0 | 1.07 | 0.2   | 1 |
| 0.06 | 1   | b1226 | 3.51 | 1.11 | 1 | 1.85 | 0.66  | 0 |
| 0.05 | 1   |       | 1.44 | 0.38 | 0 | 1.47 | 0.71  | 0 |
| 0.07 | 1   | b1254 | 0.95 | 0.42 | 0 | 1.61 | 0.71  | 0 |
| 0.06 | 1   | b0109 | 0.92 | 0.21 | 1 | 1.18 | 0.48  | 1 |
| 0.04 | 1   |       | 1.05 | 0.73 | 0 | 1.48 | 0.68  | 0 |
| 0.14 | 1   | b3892 | 1.03 | 0.12 | 1 | 0.63 | 0.36  | 1 |
| 0.05 | 1   |       | 1.78 | 0.44 | 0 | 1.35 | 0.88  | 0 |
| 0.08 | 1   |       | 0.68 | 0.14 | 1 | 0.31 | 0.08  | 1 |
| 0.1  | 1   | b3810 | 0.91 | 0.16 | 1 | 1.02 | 0.29  | 1 |
| 0.07 | 1   | b3774 | 1.5  | 0.19 | 1 | 1.55 | 0.48  | 1 |
| 0.09 | 1   | b0143 | 0.29 | 0.54 | 1 | 0.59 | 0.43  | 1 |
| 0.1  | 1   | b1818 | 1.85 | 0.24 | 1 | 1.26 | 0.84  | 1 |
| 0.06 | 1   | b1203 | 0.95 | 0.79 | 1 | 0.85 | 0.36  | 1 |
| 0.11 | 1   |       | 0.91 | 0.21 | 0 | 1.06 | 0.32  | 1 |
| 0.11 | 1   | b0461 | 1.96 | 0.45 | 1 | 1.14 | 0.87  | 1 |
| 0.11 | 1   |       | 0.51 | 0.11 | 1 | 0.7  | 0.17  | 1 |
| 0.05 | 1   | b1534 | 1.03 | 0.62 | 0 | 1.59 | 0.41  | 0 |
| 0.05 | 1   |       | 2.45 | 0.42 | 1 | 1.56 | 0.43  | 0 |
| 0.06 | 1   |       | 1.46 | 1.11 | 0 | 1.61 | 0.62  | 0 |
| 0.06 | n/a |       | 1.31 | 0.36 | 0 | 1.39 | 0.65  | 0 |
| n/a  | n/a |       | n/a  | n/a  | 0 | n/a  | n/a   | 0 |
| 0.05 | 1   |       | 1.28 | 0.64 | 0 | 1.8  | 0.66  | 0 |
| n/a  | n/a |       | n/a  | n/a  | 0 | n/a  | n/a   | 0 |
| 0.1  | 1   | b1379 | 1.54 | 0.39 | 0 | 1.23 | 0.77  | 0 |
| 0.07 | 1   |       | 1.52 | 0.5  | 0 | 1.68 | 0.69  | 0 |
| 0.05 | 1   | b0496 | 0.92 | 0.1  | 0 | 1.18 | 0.43  | 0 |
| 0.04 | 1   |       | 1.2  | 0.88 | 0 | 1.33 | 0.4   | 0 |
| 0.02 | 1   | b0525 | 0.47 | 0.05 | 1 | 0.29 | 0.49  | 1 |
| 0.09 | 1   | b0593 | 6.53 | 2.4  | 1 | 1.86 | 1.05  | 0 |
| 0.12 | 1   |       | 1.2  | 0.38 | 0 | 1.11 | 0.47  | 0 |
| 0.05 | 1   | b1220 | 1.08 | 0.12 | 0 | 1.09 | 12.47 | 1 |
| 0.06 | 1   | b1186 | 0.66 | 0.19 | 1 | 1.17 | 0.24  | 1 |
| 0.08 | n/a |       | 1.62 | 0.2  | 0 | 1.43 | 0.72  | 0 |
| 0.08 | 1   |       | 1.14 | 0.35 | 0 | 0.89 | 0.4   | 1 |
| 0.05 | 1   | b3591 | 0.96 | 0.19 | 1 | 1.09 | 0.3   | 1 |
| 0.11 | 1   |       | 1.54 | 0.53 | 0 | 1.63 | 0.67  | 0 |
| 0.14 | 1   | b3016 | 0.8  | 0.3  | 0 | 0.98 | 0.39  | 1 |
| 0.08 | 1   | b2831 | 0.98 | 0.11 | 0 | 1.23 | 0.82  | 0 |
| n/a  | n/a |       | n/a  | n/a  | 0 | n/a  | n/a   | 0 |

|     |      |           |     |      |      |       |      |      |   |
|-----|------|-----------|-----|------|------|-------|------|------|---|
|     | 0.07 | 1         |     | 6.32 | 0.9  | 1     | 6.68 | 4.57 | 1 |
|     | 0.09 | 1 b2678   |     | 1.47 | 0.34 | 0     | 2.06 | 0.54 | 0 |
|     | 0.12 | 1 b2670   |     | 1.13 | 0.09 | 1     | 0.97 | 0.33 | 1 |
|     | 0.04 | 1 b3258   |     | 0.58 | 0.13 | 1     | 1.05 | 0.3  | 1 |
| n/a | n/a  |           | n/a | n/a  |      | 0 n/a | n/a  |      | 0 |
|     | 0.11 | 1 b2905   |     | 0.19 | 0.03 | 1     | 0.08 | 0.07 | 1 |
|     | 0.59 | n/a b2941 |     | 0.81 | 0.19 | 0     | 1.62 | 0.34 | 0 |
|     | 0.13 | 1         |     | 0.29 | 0.1  | 1     | 0.44 | 0.39 | 1 |
|     | 0.05 | 1 b0457   |     | 0.92 | 0.31 | 1     | 1.08 | 0.45 | 1 |
|     | 0.1  | 1 b3523   |     | 1.7  | 0.64 | 0     | 1.44 | 0.17 | 0 |
| n/a | n/a  |           | n/a | n/a  |      | 0 n/a | n/a  |      | 0 |
|     | 0.05 | 1 b4197   |     | 1.24 | 0.21 | 0     | 1.28 | 0.16 | 0 |
|     | 0.07 | 1         |     | 1.03 | 0.19 | 0     | 1.34 | 0.37 | 1 |
|     | 0.06 | 1         |     | 1.43 | 0.32 | 0     | 1.6  | 2.37 | 0 |
|     | 0.07 | 1 b2711   |     | 1.34 | 0.18 | 0     | 1.61 | 0.62 | 0 |
|     | 0.06 | 1         |     | 1.36 | 0.53 | 0     | 1.54 | 0.64 | 0 |
|     | 0.08 | 1         |     | 2.41 | 0.28 | 1     | 1.21 | 0.29 | 1 |
|     | 0.09 | 1 b2671   |     | 0.96 | 0.11 | 0     | 1.36 | 0.49 | 1 |
|     | 0.07 | 1 b2153   |     | 1    | 0.11 | 1     | 1.16 | 0.51 | 1 |
|     | 0.11 | 1 b2047   |     | 1.13 | 0.28 | 0     | 1.39 | 0.24 | 0 |
|     | 0.04 | 1         |     | 1.46 | 0.33 | 0     | 1.74 | 0.32 | 0 |
|     | 0.04 | 1 b1193   |     | 0.88 | 0.08 | 0     | 0.98 | 0.56 | 1 |
|     | 0.1  | 1 b3580   |     | 1.23 | 0.34 | 0     | 1.19 | 0.54 | 0 |
| n/a | n/a  |           | n/a | n/a  |      | 0 n/a | n/a  |      | 0 |
|     | 0.11 | 1 b1827   |     | 0.83 | 0.13 | 1     | 0.61 | 0.45 | 1 |
|     | 0.11 | 1         |     | 1.51 | 0.62 | 0     | 1.38 | 1.02 | 0 |
|     | 0.14 | 1 b3321   |     | 0.28 | 0.05 | 1     | 0.13 | 0.2  | 1 |
|     | 0.12 | 1 b4171   |     | 0.73 | 0.14 | 1     | 0.48 | 0.36 | 1 |
|     | 0.09 | 1         |     | 0.99 | 0.19 | 1     | 1.13 | 0.38 | 0 |
|     | 0.07 | 1 b3183   |     | 0.73 | 0.11 | 1     | 0.87 | 0.21 | 1 |
|     | 0.53 | 1 b3072   |     | 1.21 | 0.32 | 0     | 1.22 | 0.31 | 0 |
|     | 0.06 | 1 b2988   |     | 0.9  | 0.16 | 1     | 0.82 | 0.14 | 1 |
|     | 0.14 | 1 b2923   |     | 1.09 | 0.42 | 0     | 1.33 | 0.22 | 0 |
|     | 0.07 | 1 b1077   |     | 0.85 | 0.2  | 1     | 0.89 | 0.33 | 1 |
|     | 0.09 | 1 b3059   |     | 0.77 | 0.18 | 1     | 1.55 | 0.64 | 0 |
|     | 0.08 | 1         |     | 1.26 | 0.19 | 1     | 0.92 | 0.2  | 1 |
| n/a | n/a  |           | n/a | n/a  |      | 0 n/a | n/a  |      | 0 |
|     | 0.08 | 1         |     | 1.17 | 0.38 | 0     | 1.23 | 0.33 | 0 |
|     | 0.13 | 1 b2954   |     | 0.44 | 0.1  | 1     | 0.77 | 0.23 | 1 |
|     | 0.11 | 1 b2901   |     | 0.69 | 0.12 | 1     | 0.74 | 0.14 | 1 |
|     | 0.17 | 0 b0753   |     | 1.52 | 0.23 | 0     | 1.55 | 0.42 | 0 |
|     | 0.08 | 1         |     | 5.82 | 0.66 | 1     | 3.94 | 5.38 | 1 |
|     | 0.08 | 1         |     | 1.53 | 0.42 | 0     | 1.38 | 0.53 | 0 |
|     | 0.07 | 0         |     | 1.27 | 2.97 | 0     | 1.42 | 0.72 | 0 |
|     | 0.06 | 1         |     | 1.43 | 1.46 | 0     | 2.07 | 0.68 | 0 |
|     | 0.06 | 1 b0795   |     | 0.83 | 0.19 | 0     | 1.03 | 0.36 | 1 |
|     | 0.04 | 1         |     | 0.44 | 0.1  | 1     | 0.58 | 0.22 | 1 |
|     | 0.08 | 1 b0454   |     | 1.29 | 0.18 | 0     | 1.35 | 0.71 | 0 |
|     | 0.06 | 1 b0391   |     | 0.84 | 0.21 | 1     | 0.93 | 0.5  | 1 |
|     | 0.12 | n/a       |     | 1.29 | 0.27 | 0     | 1.43 | 1.39 | 0 |
| n/a | n/a  |           | n/a | n/a  |      | 0 n/a | n/a  |      | 0 |
| n/a | n/a  |           | n/a | n/a  |      | 0 n/a | n/a  |      | 0 |



|      |     |       |      |        |   |      |      |   |
|------|-----|-------|------|--------|---|------|------|---|
| 0.06 | 1   |       | 1.51 | 0.31   | 0 | 1.7  | 0.72 | 0 |
| 0.03 | n/a |       | 1.09 | 0.28   | 0 | 1.2  | 7.69 | 0 |
| 0.1  | 0   |       | 1.45 | 0.2    | 0 | 1.93 | 0.63 | 0 |
| 0.04 | 1   |       | 1.25 | 0.23   | 0 | 1.34 | 0.57 | 0 |
| 0.04 | 1   | b1636 | 0.73 | 0.12   | 1 | 0.73 | 0.12 | 1 |
| 0.07 | n/a |       | 1.09 | 0.36   | 0 | 1.22 | 0.27 | 1 |
| 0.06 | 1   |       | 1.08 | 0.2    | 0 | 1.2  | 0.47 | 1 |
| 0.07 | 1   |       | 1.69 | 0.47   | 0 | 2.42 | 1.25 | 0 |
| 0.04 | 1   |       | 1.59 | 0.45   | 0 | 2.07 | 0.99 | 0 |
| 0.05 | 1   |       | 0.45 | 0.06   | 1 | 0.65 | 0.37 | 1 |
| 0.02 | 1   |       | 1.77 | 0.62   | 0 | 1.97 | 0.84 | 0 |
| 0.06 | 1   |       | 1.51 | 0.41   | 0 | 1.72 | 1.03 | 0 |
| 0.02 | 1   |       | 1.62 | 446.16 | 0 | 2.41 | 0.87 | 0 |
| 0.11 | 1   |       | 0.61 | 0.15   | 1 | 0.53 | 0.3  | 1 |
| 0.21 | 0   |       | 1.58 | 0.32   | 0 | 1.85 | 1.08 | 0 |
| 0.07 | 1   |       | 1.23 | 0.14   | 1 | 0.96 | 1.28 | 1 |
| 0.07 | 1   |       | 1.15 | 0.35   | 1 | 0.94 | 0.26 | 1 |
| 0.05 | 1   |       | 0.53 | 0.24   | 1 | 0.31 | 0.06 | 1 |
| 0.08 | 1   |       | 1.13 | 0.17   | 0 | 1.18 | 0.63 | 1 |
| 0.05 | n/a | b3559 | 0.26 | 0.04   | 1 | 0.32 | 0.06 | 1 |
| 0.11 | 1   |       | 1.29 | 0.45   | 0 | 1.29 | 0.23 | 0 |
| n/a  | n/a |       | n/a  | n/a    | 0 | n/a  | n/a  | 0 |
| n/a  | n/a |       | n/a  | n/a    | 0 | n/a  | n/a  | 0 |
| n/a  | n/a |       | n/a  | n/a    | 0 | n/a  | n/a  | 0 |
| n/a  | n/a |       | n/a  | n/a    | 0 | n/a  | n/a  | 0 |
| n/a  | n/a |       | n/a  | n/a    | 0 | n/a  | n/a  | 0 |
| n/a  | n/a |       | n/a  | n/a    | 0 | n/a  | n/a  | 0 |
| 0.05 | 1   | b1127 | 1.51 | 0.81   | 1 | 1.32 | 0.5  | 1 |
| 0.06 | 1   | b0088 | 0.98 | 0.22   | 1 | 0.97 | 0.23 | 1 |
| n/a  | n/a |       | n/a  | n/a    | 0 | n/a  | n/a  | 0 |
| 0.07 | 1   | b0134 | 0.48 | 0.12   | 1 | 0.85 | 0.32 | 1 |
| 0.04 | 1   |       | 1.46 | 0.32   | 0 | 1.39 | 0.07 | 0 |
| 0.12 | 0   |       | 1.42 | 0.68   | 0 | 1.36 | 0.78 | 0 |
| 0.1  | 1   | b0153 | 1.58 | 0.41   | 0 | 1.35 | 0.4  | 0 |
| 0.14 | n/a |       | 1.07 | 0.27   | 0 | 1.45 | 2.12 | 0 |
| 0.06 | 1   | b0686 | 0.53 | 0.16   | 1 | 0.89 | 0.25 | 1 |
| n/a  | n/a |       | n/a  | n/a    | 0 | n/a  | n/a  | 0 |
| n/a  | n/a |       | n/a  | n/a    | 0 | n/a  | n/a  | 0 |
| 0.11 | 1   | b3746 | 0.87 | 0.31   | 0 | 1.11 | 0.27 | 1 |
| n/a  | n/a |       | n/a  | n/a    | 0 | n/a  | n/a  | 0 |
| 0.14 | 1   |       | 1    | 0.22   | 0 | 1.16 | 0.24 | 1 |
| 0.07 | 1   |       | 1.1  | 0.29   | 0 | 1.46 | 0.5  | 0 |
| 0.06 | 1   |       | 1.45 | 0.52   | 0 | 1.59 | 0.67 | 0 |
| 0.04 | 1   | b0758 | 1.47 | 0.25   | 1 | 1.48 | 0.33 | 1 |
| 0.07 | 1   | b0099 | 1.04 | 0.37   | 0 | 1.73 | 0.58 | 0 |
| n/a  | n/a |       | n/a  | n/a    | 0 | n/a  | n/a  | 0 |
| 0.09 | 1   | b0970 | 0.62 | 0.1    | 1 | 0.38 | 0.09 | 1 |
| 0.07 | 1   | b3282 | 0.8  | 0.19   | 1 | 0.76 | 0.12 | 1 |
| 0.1  | 1   | b3351 | 0.79 | 0.16   | 0 | 0.87 | 0.46 | 1 |
| 0.14 | 1   | b3399 | 0.79 | 0.17   | 1 | 0.61 | 0.22 | 1 |
| 0.06 | 1   |       | 1.61 | 0.48   | 0 | 1.42 | 0.32 | 0 |
| 0.15 | 0   | b3344 | 1.37 | 0.39   | 0 | 1.09 | 0.36 | 1 |

|     |      |         |      |      |       |      |      |   |
|-----|------|---------|------|------|-------|------|------|---|
|     | 0.11 | 1 b3390 | 0.5  | 0.22 | 1     | 0.5  | 0.25 | 1 |
|     | 0.07 | 1 b1132 | 0.84 | 0.28 | 0     | 1    | 0.38 | 1 |
|     | 0.07 | 0 b1793 | 1.24 | 0.32 | 0     | 1.56 | 0.53 | 0 |
|     | 0.05 | 1       | 1.55 | 0.27 | 0     | 1.54 | 0.32 | 0 |
|     | 0.05 | 1       | 1.24 | 0.29 | 0     | 1.81 | 0.67 | 0 |
|     | 0.08 | 1 b3431 | 1.86 | 0.24 | 1     | 1.12 | 0.2  | 1 |
|     | 0.25 | 1 b3467 | 1.1  | 0.34 | 0     | 1.18 | 0.57 | 0 |
|     | 0.03 | 1       | 1.25 | 0.37 | 0     | 1.46 | 0.87 | 0 |
| n/a | n/a  |         | n/a  | n/a  | 0 n/a | n/a  |      | 0 |
|     | 0.09 | 0       | 1.47 | 0.59 | 0     | 1.53 | 0.24 | 0 |
| n/a | n/a  |         | n/a  | n/a  | 0 n/a | n/a  |      | 0 |
|     | 0.07 | 1 b2068 | 1.73 | 0.58 | 0     | 1.74 | 1.06 | 0 |
|     | 0.21 | n/a     | 1.31 | 0.23 | 0     | 1.93 | 0.73 | 0 |
| n/a | n/a  |         | n/a  | n/a  | 0 n/a | n/a  |      | 0 |
| n/a | n/a  |         | n/a  | n/a  | 0 n/a | n/a  |      | 0 |
|     | 0.07 | 1 b0951 | 0.65 | 0.22 | 1     | 0.55 | 0.28 | 1 |
|     | 0.07 | 1 b1608 | 0.79 | 0.19 | 0     | 0.92 | 0.21 | 1 |
|     | 0.04 | 1       | 1.44 | 0.29 | 0     | 1.45 | 0.55 | 0 |
| n/a | n/a  |         | n/a  | n/a  | 0 n/a | n/a  |      | 0 |
| n/a | n/a  |         | n/a  | n/a  | 0 n/a | n/a  |      | 0 |
|     | 0.03 | 1       | 1.4  | 0.44 | 0     | 1.57 | 0.7  | 0 |
|     | 0.07 | 1 b2554 | 0.95 | 0.23 | 0     | 1.12 | 0.4  | 0 |
| n/a | n/a  |         | n/a  | n/a  | 0 n/a | n/a  |      | 0 |
|     | 0.1  | 1 b0902 | 1.1  | 0.43 | 1     | 1.26 | 0.38 | 1 |
|     | 0.09 | 1 b0925 | 1.02 | 0.15 | 0     | 1.19 | 0.16 | 1 |
|     | 0.09 | 1 b3915 | 1    | 0.22 | 1     | 1.67 | 0.78 | 1 |
|     | 0.12 | 1 b4028 | 1.07 | 0.21 | 0     | 1.4  | 0.53 | 0 |
|     | 0.11 | n/a     | 1.06 | 0.48 | 0     | 2.33 | 0.98 | 0 |
|     | 0.13 | 1 b4153 | 1.17 | 0.2  | 1     | 1.17 | 0.14 | 1 |
| n/a | n/a  |         | n/a  | n/a  | 0 n/a | n/a  |      | 0 |
|     | 0.07 | 1 b0904 | 1.37 | 0.24 | 1     | 0.84 | 0.2  | 1 |
|     | 0.06 | 1       | 1.03 | 0.36 | 0     | 1.27 | 0.37 | 0 |
|     | 0.1  | 1 b4019 | 0.58 | 0.22 | 1     | 0.87 | 0.49 | 1 |
| n/a | n/a  |         | n/a  | n/a  | 0 n/a | n/a  |      | 0 |
|     | 0.1  | 1       | 1.51 | 0.35 | 0     | 1.59 | 0.63 | 0 |
|     | 0.08 | 1       | 1.63 | 0.11 | 1     | 0.94 | 0.22 | 1 |
|     | 0.11 | 1 b2293 | 1.39 | 0.49 | 0     | 1.25 | 0.97 | 0 |
|     | 0.06 | 1       | 0.9  | 0.09 | 1     | 0.62 | 0.14 | 1 |
|     | 0.05 | 1 b1106 | 0.66 | 0.08 | 0     | 1.06 | 0.35 | 1 |
| n/a | n/a  |         | n/a  | n/a  | 0 n/a | n/a  |      | 0 |
|     | 0.04 | 1 b1064 | 1.53 | 0.18 | 1     | 0.87 | 0.61 | 1 |
|     | 0.1  | 1 b3990 | 0.98 | 0.14 | 0     | 1.35 | 0.27 | 0 |
|     | 0.05 | 1 b1729 | 1.37 | 0.27 | 0     | 1.53 | 0.44 | 0 |
|     | 0.05 | 1 b4167 | 0.95 | 0.25 | 0     | 1.35 | 0.34 | 0 |
| n/a | n/a  |         | n/a  | n/a  | 0 n/a | n/a  |      | 0 |
|     | 0.07 | 1 b2208 | 1.83 | 0.16 | 0     | 1.77 | 0.68 | 0 |
|     | 0.06 | 1 b2247 | 1.34 | 0.16 | 1     | 1.36 | 0.23 | 1 |
| n/a | n/a  |         | n/a  | n/a  | 0 n/a | n/a  |      | 0 |
|     | 0.09 | 1 b2211 | 1.6  | 0.91 | 0     | 1.28 | 0.61 | 0 |
|     | 0.19 | 1 b2250 | 0.75 | 0.57 | 0     | 0.99 | 0.5  | 1 |
|     | 0.1  | 1 b2290 | 0.56 | 0.43 | 0     | 1.02 | 0.34 | 1 |
|     | 0.07 | 1 b2319 | 1.2  | 0.58 | 0     | 1.09 | 0.39 | 0 |



|      |         |      |      |   |      |      |   |
|------|---------|------|------|---|------|------|---|
| 0.06 | 1       | 2.83 | 0.47 | 0 | 1.43 | 0.88 | 0 |
| 0.05 | 1       | 1.71 | 0.33 | 0 | 1.31 | 0.73 | 0 |
| 0.11 | 1 b3743 | 1.17 | 0.5  | 0 | 1.41 | 0.48 | 0 |
| 0.01 | 1       | 1.54 | 0.29 | 0 | 1.88 | 0.64 | 0 |
| 0.09 | 1 b0183 | 0.58 | 0.08 | 1 | 1.07 | 0.24 | 1 |
| 0.08 | 1 b4040 | 1.41 | 0.21 | 1 | 1.24 | 0.18 | 1 |
| 0.06 | 1 b2341 | 0.97 | 0.14 | 1 | 1.1  | 0.32 | 1 |
| 0.06 | 1 b0093 | 1.56 | 0.19 | 1 | 1.19 | 1.16 | 1 |
| 0.05 | 1 b1747 | 0.87 | 0.27 | 0 | 1.41 | 0.38 | 0 |
| n/a  | n/a     | n/a  | n/a  | 0 | n/a  | n/a  | 0 |
| 0.1  | 0 b1679 | 1.72 | 1.02 | 0 | 2.39 | 0.81 | 1 |
| 0.04 | 1       | 1.04 | 0.18 | 0 | 1.47 | 0.49 | 0 |
| 0.06 | 1       | 1.27 | 0.56 | 0 | 1.83 | 1.15 | 0 |
| 0.05 | 1 b0402 | 1.1  | 0.15 | 1 | 1.08 | 0.46 | 1 |
| 0.1  | 1 b2202 | 9.48 | 4.94 | 1 | 2.86 | 1    | 1 |
| 0.1  | 1 b2561 | 1.24 | 0.26 | 0 | 1.06 | 0.33 | 0 |
| 0.07 | 1 b2016 | 1.05 | 0.34 | 0 | 1.23 | 0.4  | 1 |
| 0.13 | 1 b0065 | 1.25 | 0.35 | 0 | 1.41 | 0.33 | 1 |
| 0.07 | 1 b0108 | 1.38 | 0.17 | 0 | 1.43 | 0.7  | 1 |
| 0.05 | 1 b2231 | 0.34 | 0.19 | 1 | 0.32 | 0.07 | 1 |
| 0.05 | 1       | 0.96 | 0.16 | 0 | 1.44 | 0.41 | 0 |
| 0.08 | 1 b0810 | 0.7  | 0.06 | 1 | 0.82 | 0.16 | 1 |
| 0.06 | 1 b1990 | 1.37 | 0.38 | 0 | 1.57 | 0.41 | 0 |
| 0.06 | 1 b0590 | 2.25 | 0.73 | 0 | 1.63 | 0.67 | 0 |
| n/a  | n/a     | n/a  | n/a  | 0 | n/a  | n/a  | 0 |
| n/a  | n/a     | n/a  | n/a  | 0 | n/a  | n/a  | 0 |
| 0.08 | 1 b3656 | 1.19 | 0.22 | 0 | 1.59 | 0.25 | 0 |
| 0.05 | 1       | 0.95 | 0.15 | 0 | 1.22 | 0.35 | 0 |
| 0.1  | 1 b3453 | 0.85 | 0.2  | 0 | 1.04 | 0.34 | 1 |
| 0.05 | 1       | 1.24 | 0.36 | 0 | 1.61 | 0.55 | 0 |
| 0.15 | 1 b2511 | 0.61 | 0.17 | 1 | 1.04 | 0.36 | 1 |
| 0.07 | 1 b0464 | 0.71 | 0.48 | 0 | 0.71 | 0.37 | 1 |
| 0.07 | 1 b0504 | 1.77 | 0.6  | 0 | 1.96 | 0.6  | 1 |
| 0.26 | 1 b4209 | 1.82 | 0.47 | 0 | 1.58 | 0.48 | 0 |
| 0.03 | 1       | 1.67 | 0.29 | 1 | 1.34 | 0.56 | 0 |
| 0.14 | 1 b4391 | 0.34 | 0.07 | 1 | 0.56 | 0.18 | 1 |
| 0.15 | 1       | 1.35 | 0.25 | 0 | 1.96 | 0.77 | 0 |
| 0.13 | 1 b3105 | 1.08 | 0.57 | 0 | 1.08 | 0.27 | 1 |
| 0.08 | 1 b3386 | 0.59 | 0.04 | 1 | 0.48 | 1.8  | 1 |
| 0.09 | 1 b3699 | 0.84 | 0.08 | 1 | 0.46 | 0.25 | 1 |
| 0.09 | 1 b2025 | 0.95 | 0.73 | 1 | 0.98 | 0.26 | 1 |
| 0.07 | 1 b0411 | 1.26 | 0.32 | 1 | 0.75 | 0.22 | 1 |
| 0.05 | 1 b1281 | 0.54 | 0.24 | 1 | 0.79 | 0.17 | 1 |
| 0.08 | 1 b3289 | 1.2  | 0.11 | 1 | 1.18 | 0.27 | 1 |
| 0.08 | 1 b3389 | 0.59 | 0.05 | 1 | 0.52 | 0.19 | 1 |
| 0.05 | 1       | 1.66 | 0.29 | 1 | 0.57 | 0.22 | 1 |
| 0.15 | 1 b2567 | 0.29 | 0.25 | 1 | 0.64 | 0.29 | 1 |
| 0.04 | 1 b2455 | 1.54 | 0.39 | 0 | 1.73 | 0.74 | 0 |
| 0.15 | 1 b3856 | 1.25 | 0.17 | 1 | 1.28 | 0.25 | 0 |
| 0.08 | 1       | 0.65 | 0.21 | 0 | 0.6  | 0.25 | 1 |
| 0.14 | 1       | 1.23 | 0.37 | 0 | 1.56 | 0.94 | 0 |
| 0.07 | 1       | 0.67 | 0.19 | 1 | 0.43 | 0.16 | 1 |

|      |         |      |       |   |      |      |   |
|------|---------|------|-------|---|------|------|---|
| 0.06 | 1 b0847 | 1.19 | 0.47  | 0 | 1.34 | 8.34 | 0 |
| 0.06 | 1 b0828 | 0.85 | 0.24  | 0 | 1.66 | 0.49 | 0 |
| 0.08 | 1 b3364 | 1.37 | 0.36  | 0 | 1.55 | 0.61 | 0 |
| 0.07 | 0       | 1.33 | 0.75  | 0 | 2.18 | 0.83 | 0 |
| 0.12 | 1 b4107 | 1.33 | 0.24  | 0 | 1.88 | 1.03 | 0 |
| 0.05 | 1 b1864 | 0.36 | 0.05  | 1 | 0.36 | 0.13 | 1 |
| 0.06 | 1 b3241 | 1.26 | 0.29  | 0 | 1.6  | 0.62 | 0 |
| 0.06 | 0 b0023 | 0.62 | 0.22  | 1 | 0.9  | 1.14 | 1 |
| 0.1  | 1       | 1.15 | 0.23  | 0 | 1.95 | 0.89 | 0 |
| 0.06 | 1       | 1.29 | 0.41  | 0 | 1.67 | 0.69 | 0 |
| 0.14 | n/a     | 1.04 | 0.29  | 0 | 1.57 | 0.61 | 0 |
| 0.08 | 1       | 1.3  | 0.33  | 0 | 1.34 | 0.81 | 1 |
| 0.02 | 1       | 1.68 | 0.44  | 0 | 1.91 | 0.52 | 0 |
| 0.04 | 1 b4119 | 0.85 | 0.23  | 0 | 1.3  | 0.67 | 0 |
| 0.09 | 1 b1871 | 0.49 | 0.15  | 1 | 1.02 | 0.24 | 1 |
| 0.07 | 1       | 1.45 | 0.36  | 0 | 1.2  | 3.4  | 0 |
| 0.06 | 1       | 1.61 | 0.29  | 0 | 2.4  | 1.29 | 0 |
| 0.13 | 1 b2618 | 1.61 | 0.45  | 0 | 1.37 | 0.28 | 1 |
| 0.09 | 1 b0025 | 0.4  | 0.2   | 1 | 0.72 | 0.14 | 1 |
| 0.14 | 1 b4237 | 1.49 | 9.48  | 0 | 1.55 | 0.46 | 0 |
| 0.09 | 1       | 1.43 | 14.83 | 0 | 1.57 | 0.35 | 0 |
| 0.09 | 1 b3784 | 0.66 | 0.17  | 0 | 0.96 | 1.03 | 1 |
| 0.09 | 1 b3825 | 0.92 | 0.16  | 0 | 1.14 | 0.61 | 1 |
| 0.09 | 1 b2806 | 0.76 | 0.36  | 0 | 1.17 | 0.57 | 0 |
| 0.12 | 1 b3983 | 0.34 | 0.05  | 1 | 0.11 | 0.02 | 1 |
| 0.02 | 1 b1079 | 0.8  | 0.15  | 1 | 1.04 | 0.33 | 1 |
| 0.09 | 1 b3367 | 1.16 | 0.21  | 0 | 1.59 | 0.37 | 0 |
| 0.07 | 1 b3237 | 0.67 | 0.13  | 1 | 0.73 | 0.18 | 1 |
| 0.07 | 1 b2781 | 0.71 | 0.09  | 1 | 0.94 | 0.31 | 1 |
| 0.11 | 1 b3932 | 0.67 | 0.24  | 0 | 0.94 | 0.32 | 1 |
| 0.11 | 1 b3846 | 0.32 | 0.14  | 1 | 0.16 | 0.08 | 1 |
| 0.14 | 1       | 1.07 | 0.33  | 0 | 1.3  | 0.49 | 0 |
| 0.08 | 1 b3812 | 1.21 | 0.16  | 0 | 1.47 | 0.45 | 0 |
| 0.07 | 1       | 0.8  | 0.22  | 1 | 0.82 | 0.16 | 1 |
| 0.04 | 1       | 1.17 | 0.95  | 0 | 1.14 | 0.41 | 1 |
| 0.08 | 1 b3988 | 0.62 | 0.05  | 1 | 0.26 | 0.12 | 1 |
| 0.07 | 1 b1288 | 0.4  | 0.05  | 1 | 0.32 | 0.12 | 1 |
| 0.13 | 1       | 1.74 | 2.77  | 1 | 1.56 | 0.42 | 1 |
| 0.07 | 1 b2791 | 0.91 | 0.09  | 0 | 1.24 | 0.67 | 0 |
| 0.04 | 1       | 1.52 | 0.56  | 0 | 1.39 | 0.5  | 0 |
| 0.1  | 1 b0507 | 1.34 | 0.32  | 0 | 1.4  | 0.75 | 0 |
| 0.02 | 1 b0927 | 0.31 | 0.06  | 1 | 0.54 | 0.14 | 1 |
| 0.03 | 1 b1466 | 1.34 | 0.49  | 0 | 1.56 | 0.44 | 0 |
| 0.04 | 1       | 1.19 | 0.19  | 0 | 1.58 | 0.43 | 0 |
| 0.06 | 1 b1255 | 0.49 | 0.12  | 1 | 0.75 | 0.31 | 1 |
| 0.06 | 1 b1204 | 0.82 | 0.22  | 1 | 0.9  | 0.33 | 1 |
| 0.02 | 1 b1805 | 1.19 | 0.19  | 1 | 0.97 | 0.25 | 1 |
| 0.09 | 1 b1833 | 0.71 | 0.33  | 1 | 1.12 | 0.2  | 1 |
| 0.07 | 1 b1843 | 0.65 | 0.09  | 1 | 1.2  | 0.46 | 0 |
| 0.05 | 1 b0465 | 0.6  | 0.2   | 1 | 1.18 | 0.26 | 1 |
| 0.14 | 1       | 1.11 | 0.55  | 0 | 2.01 | 0.71 | 0 |
| 0.06 | 1       | 1.32 | 0.44  | 0 | 1.33 | 0.3  | 1 |

|      |     |       |      |        |   |      |      |   |
|------|-----|-------|------|--------|---|------|------|---|
| 0.05 | 1   | b0914 | 0.38 | 0.12   | 1 | 0.63 | 0.17 | 1 |
| 0.08 | 1   | b0601 | 1.84 | 0.36   | 0 | 1.42 | 0.72 | 0 |
| 0.05 | 1   | b1430 | 0.96 | 0.21   | 0 | 0.97 | 0.31 | 1 |
| n/a  | n/a |       | n/a  | n/a    | 0 | n/a  | n/a  | 0 |
| 0.09 | 1   | b1434 | 1.11 | 0.48   | 0 | 1.57 | 0.44 | 0 |
| 0.07 | 1   | b3529 | 0.84 | 0.36   | 0 | 1.45 | 0.39 | 1 |
| n/a  | n/a |       | n/a  | n/a    | 0 | n/a  | n/a  | 0 |
| 0.07 | 1   |       | 1.13 | 0.18   | 1 | 1.14 | 0.46 | 1 |
| 0.09 | 1   | b2721 | 1    | 0.22   | 0 | 1.23 | 0.38 | 0 |
| 0.08 | 1   | b2801 | 1.39 | 0.27   | 0 | 1.53 | 0.52 | 0 |
| 0.06 | 1   |       | 0.99 | 0.21   | 0 | 1.48 | 0.42 | 1 |
| 0.06 | 1   | b0412 | 1.04 | 0.58   | 1 | 1.35 | 0.17 | 1 |
| 0.06 | 1   | b0439 | 0.57 | 0.13   | 1 | 0.73 | 0.22 | 1 |
| 0.16 | 1   | b3481 | 0.82 | 0.16   | 1 | 0.86 | 0.4  | 1 |
| 0.07 | n/a | b3546 | 0.96 | 0.14   | 0 | 1.35 | 0.17 | 0 |
| 0.06 | 1   |       | 1.12 | 0.25   | 0 | 1.13 | 0.63 | 0 |
| 0.09 | 1   | b3613 | 0.61 | 0.29   | 0 | 1.06 | 0.11 | 1 |
| 0.07 | 1   | b0209 | 0.69 | 0.33   | 1 | 0.91 | 0.1  | 1 |
| 0.1  | 1   | b0406 | 0.39 | 0.1    | 1 | 0.46 | 0.12 | 1 |
| 0.16 | 0   | b2991 | 1.66 | 0.47   | 0 | 1.92 | 1.02 | 0 |
| 0.07 | 1   | b2686 | 0.36 | 0.13   | 1 | 0.53 | 0.17 | 1 |
| 0.12 | 1   | b3539 | 1.54 | 0.39   | 0 | 1.64 | 0.61 | 0 |
| 0.1  | 1   |       | 1.7  | 0.43   | 0 | 1.38 | 0.37 | 0 |
| 0.11 | 1   | b3181 | 1.11 | 0.12   | 1 | 0.85 | 0.19 | 1 |
| 0.1  | 1   | b3070 | 1.53 | 0.4    | 0 | 2.18 | 0.81 | 0 |
| 0.14 | 1   |       | 7.14 | 1.03   | 1 | 3.34 | 0.61 | 1 |
| 0.06 | 1   | b2697 | 0.23 | 0.02   | 1 | 0.15 | 0.05 | 1 |
| 0.04 | 1   | b2150 | 0.71 | 0.11   | 1 | 0.27 | 0.11 | 1 |
| 0.05 | 1   |       | 0.48 | 10.63  | 1 | 0.88 | 0.32 | 1 |
| 0.07 | 1   | b2709 | 1.29 | 0.23   | 0 | 1.83 | 0.73 | 0 |
| 0.05 | 1   | b2178 | 0.93 | 0.45   | 0 | 1.6  | 0.45 | 0 |
| n/a  | n/a |       | n/a  | n/a    | 0 | n/a  | n/a  | 0 |
| 0.18 | 1   | b2128 | 1.73 | 0.44   | 0 | 2.1  | 1.02 | 0 |
| 0.11 | 1   | b0870 | 0.95 | 0.2    | 0 | 1.32 | 1.06 | 0 |
| 0.11 | 0   | b3310 | 0.31 | 0.04   | 1 | 0.13 | 0.1  | 1 |
| 0.08 | 1   |       | 1.34 | 0.6    | 0 | 1.32 | 0.4  | 1 |
| 0.07 | 1   |       | 1.55 | 0.31   | 0 | 1.56 | 0.37 | 0 |
| 0.08 | 1   | b3300 | 0.56 | 0.11   | 1 | 0.18 | 0.07 | 1 |
| 0.1  | 1   | b3493 | 0.39 | 0.06   | 1 | 0.95 | 0.24 | 1 |
| 0.08 | 1   | b3226 | 0.67 | 0.13   | 1 | 0.75 | 0.29 | 1 |
| 0.11 | 1   | b4351 | 1.09 | 0.25   | 0 | 1.41 | 0.32 | 0 |
| 0.05 | 1   | b4221 | 0.97 | 0.15   | 1 | 0.9  | 1.16 | 1 |
| 0.1  | 1   | b4372 | 0.44 | 0.07   | 1 | 0.69 | 0.38 | 1 |
| 0.07 | 1   | b4149 | 1.35 | 0.21   | 0 | 1.25 | 0.37 | 0 |
| 0.08 | 1   | b4243 | 0.48 | 0.36   | 1 | 0.3  | 0.03 | 1 |
| 0.05 | 1   |       | 1.76 | 0.81   | 0 | 1.45 | 0.22 | 0 |
| 0.07 | 1   | b0658 | 0.22 | 148.55 | 1 | 0.42 | 0.12 | 1 |
| 0.11 | 1   | b3204 | 0.88 | 0.29   | 1 | 0.59 | 0.08 | 1 |
| 0.08 | 1   | b3103 | 1.28 | 0.4    | 0 | 2.01 | 0.41 | 0 |
| 0.04 | 1   |       | 0.48 | 0.25   | 1 | 0.21 | 0.03 | 1 |
| 0.8  | 1   |       | 0.78 | 0.34   | 0 | 1.09 | 0.33 | 0 |
| 0.06 | 1   | b2894 | 0.68 | 0.1    | 1 | 0.83 | 0.51 | 1 |

|     |      |     |       |      |      |     |      |      |   |
|-----|------|-----|-------|------|------|-----|------|------|---|
| n/a | n/a  |     | n/a   | n/a  | 0    | n/a | n/a  | 0    |   |
|     | 0.02 | 1   |       | 1.34 | 0.3  | 0   | 1.38 | 0.45 | 0 |
|     | 0.09 | 1   |       | 0.74 | 0.17 | 0   | 0.93 | 0.29 | 1 |
|     | 0.03 | n/a |       | 1.22 | 0.37 | 0   | 1.54 | 0.54 | 1 |
|     | 0.05 | 1   |       | 1.42 | 0.35 | 0   | 1.79 | 0.7  | 0 |
|     | 0.07 | 1   | b0813 | 1.62 | 0.2  | 1   | 1.81 | 0.35 | 1 |
|     | 0.08 | 1   | b2899 | 2.1  | 0.4  | 1   | 1.39 | 0.46 | 1 |
|     | 0.1  | 1   |       | 1.37 | 0.24 | 1   | 1.21 | 0.38 | 1 |
|     | 0.14 | 1   | b0407 | 0.29 | 0.05 | 1   | 0.51 | 0.13 | 1 |
|     | 0.1  | 1   | b0460 | 1.29 | 0.17 | 1   | 0.67 | 0.24 | 1 |
|     | 0.05 | 1   | b3006 | 3.04 | 0.41 | 1   | 1.38 | 0.41 | 1 |
|     | 0.13 | 1   | b2809 | 0.94 | 0.17 | 0   | 1.92 | 0.84 | 0 |
|     | 0.09 | 1   |       | 1.29 | 0.23 | 0   | 1.49 | 0.79 | 0 |
|     | 0.13 | 1   | b4079 | 1.16 | 0.73 | 0   | 1.51 | 0.59 | 0 |
|     | 0.05 | 1   | b4057 | 0.95 | 0.2  | 0   | 1.17 | 0.17 | 1 |
|     | 0.07 | 1   | b4144 | 0.53 | 0.19 | 1   | 0.52 | 0.17 | 1 |
|     | 0.04 | 1   |       | 2.02 | 0.6  | 1   | 2.06 | 1.33 | 1 |
| n/a | n/a  |     | n/a   | n/a  | 0    | n/a | n/a  | 0    |   |
|     | 0.06 | 1   | b2255 | 0.15 | 0.01 | 1   | 0.19 | 0.06 | 1 |
|     | 0.1  | n/a |       | 1.79 | 0.33 | 1   | 1.7  | 0.39 | 0 |
|     | 0.08 | 1   |       | 1.14 | 0.26 | 0   | 1.9  | 0.88 | 0 |
|     | 0.11 | 1   |       | 1.33 | 0.27 | 0   | 1.76 | 0.41 | 0 |
|     | 0.06 | 1   | b1523 | 1.26 | 0.32 | 0   | 1.59 | 1.01 | 0 |
|     | 0.11 | 1   | b1376 | 2.41 | 0.28 | 1   | 1.41 | 0.4  | 1 |
|     | 0.08 | 1   | b1842 | 0.81 | 0.22 | 0   | 1.17 | 0.5  | 0 |
|     | 0.04 | 1   | b0107 | 0.96 | 0.24 | 0   | 1.78 | 0.26 | 0 |
|     | 0.1  | 1   |       | 1.59 | 0.86 | 0   | 1.5  | 0.34 | 0 |
|     | 0.05 | 1   | b3745 | 0.67 | 0.12 | 1   | 0.94 | 0.28 | 1 |
|     | 0.08 | 1   | b0415 | 0.68 | 0.08 | 1   | 0.72 | 0.24 | 1 |
|     | 0.08 | 0   | b2939 | 1.49 | 0.18 | 0   | 1.99 | 1.28 | 0 |
| n/a | n/a  |     | n/a   | n/a  | 0    | n/a | n/a  | 0    |   |
|     | 0.03 | 1   | b1382 | 1.47 | 0.34 | 0   | 1.35 | 0.36 | 0 |
|     | 0.03 | 1   | b1307 | 1.39 | 0.31 | 0   | 1.46 | 0.4  | 0 |
| n/a | n/a  |     | n/a   | n/a  | 0    | n/a | n/a  | 0    |   |
|     | 0.08 | 0   | b1826 | 2.3  | 0.44 | 0   | 1.58 | 0.58 | 0 |
| n/a | n/a  |     | n/a   | n/a  | 0    | n/a | n/a  | 0    |   |
|     | 0.12 | 0   |       | 1.75 | 0.52 | 1   | 1.34 | 1.08 | 0 |
| n/a | n/a  |     | n/a   | n/a  | 0    | n/a | n/a  | 0    |   |
| n/a | n/a  |     | n/a   | n/a  | 0    | n/a | n/a  | 0    |   |
| n/a | n/a  |     | n/a   | n/a  | 0    | n/a | n/a  | 0    |   |
| n/a | n/a  |     | n/a   | n/a  | 0    | n/a | n/a  | 0    |   |
| n/a | n/a  |     | n/a   | n/a  | 0    | n/a | n/a  | 0    |   |
| n/a | n/a  |     | n/a   | n/a  | 0    | n/a | n/a  | 0    |   |
| n/a | n/a  |     | n/a   | n/a  | 0    | n/a | n/a  | 0    |   |
| n/a | n/a  |     | n/a   | n/a  | 0    | n/a | n/a  | 0    |   |
| n/a | n/a  |     | n/a   | n/a  | 0    | n/a | n/a  | 0    |   |
| n/a | n/a  |     | n/a   | n/a  | 0    | n/a | n/a  | 0    |   |
|     | 0.05 | n/a | b1814 | 0.4  | 0.1  | 1   | 0.76 | 0.19 | 1 |
|     | 0.08 | 1   |       | 1.1  | 0.31 | 0   | 2.4  | 0.69 | 0 |
| n/a | n/a  |     | n/a   | n/a  | 0    | n/a | n/a  | 0    |   |
| n/a | n/a  |     | n/a   | n/a  | 0    | n/a | n/a  | 0    |   |

|      |     |       |      |      |   |      |      |   |
|------|-----|-------|------|------|---|------|------|---|
| 0.07 | n/a | b2788 | 2.46 | 0.6  | 1 | 1.18 | 0.81 | 1 |
| 0.05 | n/a | b2935 | 0.29 | 0.03 | 1 | 0.22 | 0.07 | 1 |
| 0.06 | n/a |       | 2.02 | 0.21 | 1 | 1.83 | 0.43 | 0 |
| 0.03 | 1   |       | 1.55 | 0.64 | 0 | 1.85 | 0.85 | 0 |
| 0.06 | 1   |       | 1.07 | 0.45 | 0 | 1.34 | 0.32 | 0 |
| 0.03 | 1   |       | 1.02 | 0.23 | 0 | 1.5  | 0.42 | 1 |
| 0.09 | 0   |       | 1.73 | 0.75 | 0 | 2.2  | 1.06 | 0 |
| 0.07 | 1   |       | 0.47 | 0.08 | 1 | 0.32 | 0.07 | 1 |
| 0.04 | 1   |       | 1.19 | 0.1  | 0 | 1.75 | 0.46 | 1 |
| 0.04 | 1   |       | 1.11 | 0.23 | 0 | 1.24 | 0.24 | 1 |
| 0.05 | 1   |       | 1.34 | 0.24 | 0 | 1.42 | 0.45 | 0 |
| 0.08 | 1   |       | 1.24 | 0.31 | 0 | 2.03 | 0.39 | 0 |
| 0.09 | 1   |       | 0.53 | 0.17 | 1 | 0.85 | 0.25 | 1 |
| 0.1  | 1   |       | 1.44 | 0.45 | 0 | 1.39 | 0.89 | 0 |
| 0.15 | 0   |       | 1.68 | 0.32 | 0 | 2.12 | 1.51 | 0 |
| 0.08 | 1   |       | 1.35 | 0.25 | 0 | 1.62 | 0.3  | 0 |
| 0.03 | n/a |       | 1.16 | 0.26 | 0 | 1.77 | 2.11 | 0 |
| 0.08 | 1   |       | 2.12 | 0.51 | 0 | 1.71 | 1.17 | 0 |
| 0.05 | 1   |       | 1.39 | 0.27 | 0 | 1.42 | 0.48 | 0 |
| 0.1  | 1   |       | 1.58 | 0.29 | 0 | 1.97 | 0.61 | 0 |
| 0.17 | 1   |       | 1.21 | 0.24 | 1 | 1.66 | 1.55 | 1 |
| 0.04 | 1   |       | 1.06 | 0.71 | 0 | 1.51 | 0.62 | 0 |
| 0.04 | 1   |       | 0.85 | 0.13 | 1 | 1.36 | 0.32 | 1 |
| 0.05 | 1   |       | 1.14 | 0.21 | 0 | 1.62 | 1.23 | 0 |
| 0.07 | 1   |       | 1.82 | 0.53 | 0 | 1.61 | 1.49 | 0 |
| 0.07 | 1   |       | 1.69 | 0.25 | 1 | 1.04 | 0.34 | 1 |
| 0.05 | 1   |       | 1.2  | 0.22 | 0 | 1.46 | 0.35 | 0 |
| 0.07 | 1   |       | 1.47 | 0.3  | 0 | 1.46 | 0.55 | 0 |
| 0.06 | 1   |       | 1.54 | 0.26 | 0 | 1.62 | 1.1  | 0 |
| 0.03 | 1   |       | 1.18 | 0.19 | 0 | 1.64 | 0.74 | 1 |
| 0.06 | 1   |       | 1.22 | 0.31 | 0 | 1.77 | 0.54 | 0 |
| 0.06 | 1   |       | 1.51 | 0.24 | 1 | 1.45 | 0.33 | 1 |
| 0.03 | 1   |       | 1.09 | 0.3  | 0 | 1.24 | 0.18 | 0 |
| n/a  | n/a |       | n/a  | n/a  | 0 | n/a  | n/a  | 0 |
| n/a  | n/a |       | n/a  | n/a  | 0 | n/a  | n/a  | 0 |
| n/a  | n/a |       | n/a  | n/a  | 0 | n/a  | n/a  | 0 |
| n/a  | n/a |       | n/a  | n/a  | 0 | n/a  | n/a  | 0 |
| n/a  | n/a |       | n/a  | n/a  | 0 | n/a  | n/a  | 0 |
| n/a  | n/a |       | n/a  | n/a  | 0 | n/a  | n/a  | 0 |
| 0.08 | 1   |       | 1.14 | 0.23 | 0 | 1.67 | 0.82 | 0 |
| 0.1  | 1   | b3197 | 0.71 | 0.06 | 1 | 0.61 | 0.26 | 1 |
| 0.15 | 1   |       | 1.09 | 0.31 | 0 | 1.55 | 0.73 | 0 |
| 0.11 | n/a |       | 1.02 | 0.2  | 1 | 1.42 | 0.39 | 1 |
| n/a  | n/a |       | n/a  | n/a  | 0 | n/a  | n/a  | 0 |
| 0.16 | 1   |       | 0.88 | 0.07 | 0 | 1.37 | 0.43 | 0 |
| 0.13 | 1   |       | 0.59 | 0.13 | 1 | 1.04 | 0.34 | 1 |
| 0.11 | 1   | b1581 | 1.05 | 0.22 | 0 | 1.55 | 0.44 | 0 |
| 0.04 | 1   |       | 1    | 0.23 | 0 | 1.64 | 0.95 | 0 |
| 0.09 | 1   | b4241 | 1.15 | 0.78 | 0 | 1.32 | 0.79 | 0 |
| 0.1  | n/a |       | 1.52 | 0.58 | 0 | 2.43 | 1.03 | 0 |
| 0.06 | 1   | b0008 | 0.34 | 0.05 | 1 | 0.21 | 0.32 | 1 |
| 0.08 | 1   | b1263 | 1.14 | 0.37 | 0 | 1.85 | 0.57 | 0 |

|     |          |         |     |      |      |       |      |      |   |
|-----|----------|---------|-----|------|------|-------|------|------|---|
|     | 0.12     | 1       |     | 1.15 | 0.19 | 0     | 1.84 | 0.66 | 0 |
|     | 0.07     | 1 b1261 |     | 1.38 | 0.28 | 1     | 1.34 | 0.55 | 0 |
| n/a | n/a      |         | n/a | n/a  |      | 0 n/a | n/a  |      | 0 |
|     | 0.1      | 1 b0059 |     | 1.01 | 0.61 | 0     | 1.83 | 0.29 | 0 |
|     | 0.1      | 1       |     | 0.79 | 0.4  | 0     | 1.32 | 0.45 | 0 |
| n/a | n/a      |         | n/a | n/a  |      | 0 n/a | n/a  |      | 0 |
|     | 0.04     | 1       |     | 1.09 | 0.37 | 0     | 1.81 | 0.72 | 0 |
|     | 0.09     | 1       |     | 4.06 | 0.58 | 1     | 2.16 | 0.74 | 1 |
|     | 0.04     | 1 b1066 |     | 0.86 | 0.11 | 1     | 0.75 | 0.35 | 1 |
|     | 0.1      | 1 b1108 |     | 1.16 | 0.08 | 1     | 0.95 | 0.33 | 1 |
|     | 0.06     | 1       |     | 1.08 | 0.27 | 0     | 2.02 | 0.87 | 0 |
|     | 0.07     | 1 b1054 |     | 0.65 | 0.14 | 1     | 0.98 | 0.26 | 1 |
|     | 0.06     | 1 b1100 |     | 0.88 | 0.3  | 1     | 1.44 | 0.39 | 0 |
|     | 0.1      | 1 b3426 |     | 1.79 | 0.19 | 1     | 1.41 | 0.5  | 0 |
|     | 0.13     | 1 b3447 |     | 1.38 | 0.52 | 0     | 2.35 | 0.66 | 0 |
|     | 0.06     | 1 b4360 |     | 0.97 | 0.26 | 0     | 1.73 | 0.43 | 0 |
|     | 0.12 n/a | b4394   |     | 1.08 | 0.31 | 0     | 1.88 | 2.34 | 0 |
|     | 0.12     | 1 b1792 |     | 1.56 | 0.28 | 0     | 2    | 0.62 | 0 |
|     | 0.06     | 1 b4364 |     | 1.05 | 0.21 | 0     | 1.66 | 0.42 | 0 |
|     | 0.14     | 1 b4396 |     | 0.35 | 0.34 | 1     | 0.76 | 0.46 | 1 |
|     | 0.11     | 1       |     | 1.27 | 0.69 | 0     | 1.79 | 0.39 | 0 |
| n/a | n/a      |         | n/a | n/a  |      | 0 n/a | n/a  |      | 0 |
|     | 0.06     | 1       |     | 1.47 | 0.24 | 0     | 1.53 | 0.27 | 0 |
| n/a | n/a      |         | n/a | n/a  |      | 0 n/a | n/a  |      | 0 |
| n/a | n/a      |         | n/a | n/a  |      | 0 n/a | n/a  |      | 0 |
| n/a | n/a      |         | n/a | n/a  |      | 0 n/a | n/a  |      | 0 |
|     | 0.06     | 1       |     | 4.51 | 2.47 | 1     | 3.33 | 0.93 | 1 |
| n/a | n/a      |         | n/a | n/a  |      | 0 n/a | n/a  |      | 0 |
|     | 0.02     | 1       |     | 1.27 | 0.27 | 0     | 1.67 | 0.61 | 0 |
|     | 0.11     | 1       |     | 1.73 | 0.41 | 0     | 2.41 | 0.78 | 0 |
|     | 0.15 n/a | b2434   |     | 0.51 | 0.1  | 1     | 0.92 | 0.46 | 1 |
|     | 0.12     | 1 b2479 |     | 0.74 | 0.18 | 0     | 1.41 | 0.54 | 0 |
|     | 0.07     | 1 b0898 |     | 1.41 | 0.32 | 0     | 1.55 | 0.49 | 0 |
|     | 0.08     | 1 b0923 |     | 0.89 | 0.21 | 0     | 1.21 | 0.38 | 0 |
|     | 0.13 n/a |         |     | 1.54 | 0.47 | 0     | 1.8  | 0.8  | 0 |
|     | 0.07     | 1 b2532 |     | 1.39 | 0.22 | 1     | 1.39 | 0.7  | 1 |
| n/a | n/a      |         | n/a | n/a  |      | 0 n/a | n/a  |      | 0 |
|     | 0.16     | 0 b1518 |     | 1.55 | 0.33 | 0     | 1.67 | 0.54 | 0 |
|     | 0.18     | 1 b3955 |     | 0.33 | 0.52 | 1     | 0.8  | 0.4  | 1 |
|     | 0.08     | 1       |     | 1.57 | 0.42 | 0     | 1.53 | 0.99 | 1 |
| n/a | n/a      |         | n/a | n/a  |      | 0 n/a | n/a  |      | 0 |
|     | 0.09     | 1 b2503 |     | 1.26 | 0.13 | 0     | 1.91 | 0.74 | 0 |
|     | 0.08     | 1       |     | 6.52 | 1.53 | 1     | 3.38 | 1.45 | 1 |
| n/a | n/a      |         | n/a | n/a  |      | 0 n/a | n/a  |      | 0 |
|     | 0.11     | 1       |     | 0.96 | 0.1  | 0     | 1.53 | 0.87 | 0 |
| n/a | n/a      |         | n/a | n/a  |      | 0 n/a | n/a  |      | 0 |
|     | 0.08     | 1 b2729 |     | 1.21 | 0.11 | 1     | 1.4  | 0.57 | 0 |
| n/a | n/a      |         | n/a | n/a  |      | 0 n/a | n/a  |      | 0 |
|     | 0.15     | 1 b4332 |     | 0.88 | 0.3  | 0     | 1.35 | 0.39 | 0 |
|     | 0.06 n/a |         |     | 1.57 | 0.36 | 0     | 1.17 | 1.21 | 0 |
|     | 0.08     | 1 b1797 |     | 1.19 | 0.17 | 0     | 1.82 | 0.95 | 0 |
|     | 0.06     | 1 b1599 |     | 1.15 | 0.34 | 0     | 1.93 | 0.98 | 0 |

|     |          |         |     |      |      |       |      |      |   |
|-----|----------|---------|-----|------|------|-------|------|------|---|
|     | 0.05     | 1 b1133 |     | 0.31 | 0.04 | 1     | 0.55 | 0.44 | 1 |
|     | 0.03     | 1 b1111 |     | 1.82 | 0.36 | 1     | 1.52 | 0.57 | 1 |
|     | 0.17 n/a |         |     | 1.63 | 0.19 | 0     | 1.63 | 0.42 | 0 |
|     | 0.07     | 1       |     | 1.49 | 0.47 | 0     | 1.15 | 0.46 | 0 |
| n/a | n/a      |         | n/a | n/a  |      | 0 n/a | n/a  |      | 0 |
| n/a | n/a      |         | n/a | n/a  |      | 0 n/a | n/a  |      | 0 |
| n/a | n/a      |         | n/a | n/a  |      | 0 n/a | n/a  |      | 0 |
| n/a | n/a      |         | n/a | n/a  |      | 0 n/a | n/a  |      | 0 |
| n/a | n/a      |         | n/a | n/a  |      | 0 n/a | n/a  |      | 0 |
|     | 0.09 n/a | b4269   |     | 1.42 | 0.41 | 0     | 1.98 | 0.66 | 0 |
|     | 0.07     | 1       |     | 1.72 | 0.26 | 1     | 1.86 | 1.71 | 0 |
|     | 0.05     | 0 b1892 |     | 1.11 | 0.31 | 0     | 1.2  | 0.57 | 0 |
|     | 0.08     | 1 b1710 |     | 0.99 | 0.48 | 1     | 1.71 | 0.46 | 0 |
|     | 0.1      | 1 b2028 |     | 0.42 | 0.17 | 1     | 0.84 | 0.17 | 1 |
|     | 0.1      | 1 b3700 |     | 0.72 | 0.17 | 1     | 1.17 | 0.36 | 1 |
|     | 0.1      | 1 b2559 |     | 1.16 | 0.24 | 0     | 1.89 | 0.83 | 0 |
|     | 0.06     | 1 b0159 |     | 0.56 | 0.28 | 1     | 0.87 | 0.4  | 1 |
|     | 0.1      | 1 b0089 |     | 1.4  | 0.22 | 1     | 1.71 | 0.54 | 0 |
|     | 0.05     | 1 b0068 |     | 1.08 | 0.34 | 0     | 1.9  | 0.96 | 0 |
|     | 0.1      | 1 b2330 |     | 0.34 | 0.17 | 1     | 0.69 | 0.26 | 1 |
|     | 0.07     | 1 b1728 |     | 1.34 | 0.17 | 0     | 2.32 | 0.86 | 0 |
|     | 0.11     | 1 b1947 |     | 1.34 | 0.54 | 0     | 1.69 | 0.98 | 0 |
|     | 0.05     | 1 b2104 |     | 1.23 | 0.46 | 0     | 1.33 | 0.95 | 0 |
|     | 0.08     | 1 b1611 |     | 1.52 | 0.27 | 1     | 1.06 | 0.65 | 1 |
| n/a | n/a      |         | n/a | n/a  |      | 0 n/a | n/a  |      | 0 |
|     | 0.08     | 1       |     | 1.08 | 0.11 | 1     | 0.85 | 0.21 | 1 |
|     | 0.15     | 1 b3715 |     | 0.59 | 0.16 | 0     | 1.45 | 0.31 | 0 |
|     | 0.06     | 1 b0171 |     | 0.28 | 0.03 | 1     | 0.3  | 0.07 | 1 |
|     | 0.08     | 1       |     | 0.28 | 0.1  | 1     | 0.57 | 0.29 | 1 |
|     | 0.06     | 1 b0098 |     | 0.38 | 0.04 | 1     | 0.38 | 0.67 | 1 |
|     | 0.1      | 1 b2280 |     | 0.62 | 0.04 | 1     | 0.83 | 0.47 | 1 |
| n/a | n/a      |         | n/a | n/a  |      | 0 n/a | n/a  |      | 0 |
|     | 0.22     | 1       |     | 1.33 | 0.39 | 0     | 1.76 | 0.73 | 0 |
|     | 0.09     | 1 b0490 |     | 1    | 0.25 | 0     | 1.58 | 0.52 | 0 |
|     | 0.06     | 1 b0479 |     | 0.96 | 0.33 | 0     | 1.74 | 1.16 | 0 |
|     | 0.14     | 1 b4152 |     | 1.28 | 0.11 | 1     | 1.32 | 0.36 | 0 |
| n/a | n/a      |         | n/a | n/a  |      | 0 n/a | n/a  |      | 0 |
|     | 0.05     | 1       |     | 1.41 | 0.24 | 0     | 1.47 | 0.73 | 0 |
|     | 0.07     | 1 b3035 |     | 0.52 | 0.03 | 1     | 0.49 | 0.4  | 1 |
|     | 0.1      | 1 b3073 |     | 0.98 | 0.14 | 0     | 1.62 | 0.46 | 0 |
|     | 0.1      | 1       |     | 1.49 | 0.44 | 0     | 1.65 | 0.36 | 0 |
|     | 0.14     | 1 b2252 |     | 0.65 | 0.2  | 0     | 1.45 | 0.48 | 0 |
|     | 0.06     | 1 b2411 |     | 0.81 | 0.29 | 0     | 1.59 | 0.58 | 0 |
|     | 0.03     | 1 b0509 |     | 1.48 | 0.75 | 0     | 2.14 | 2.42 | 0 |
|     | 0.08 n/a |         |     | 1.17 | 0.3  | 0     | 1.47 | 0.75 | 0 |
| n/a | n/a      |         | n/a | n/a  |      | 0 n/a | n/a  |      | 0 |
| n/a | n/a      |         | n/a | n/a  |      | 0 n/a | n/a  |      | 0 |
|     | 0.1      | 1 b2585 |     | 0.85 | 0.1  | 1     | 0.91 | 1.13 | 1 |
|     | 0.12     | 1 b3057 |     | 0.8  | 0.15 | 0     | 1.37 | 0.55 | 0 |
|     | 0.04     | 1 b3486 |     | 1.23 | 0.14 | 1     | 1.34 | 0.46 | 1 |
|     | 0.09     | 1       |     | 0.93 | 0.22 | 1     | 1.49 | 0.49 | 0 |
|     | 0.08     | 1 b0417 |     | 0.68 | 0.15 | 1     | 1.02 | 0.62 | 1 |

|      |         |      |      |   |      |      |   |
|------|---------|------|------|---|------|------|---|
| 0.12 | 1       | 0.8  | 0.12 | 0 | 1.27 | 0.49 | 0 |
| 0.03 | 1 b0826 | 0.62 | 0.15 | 1 | 1.27 | 0.46 | 0 |
| 0.1  | 1       | 0.45 | 0.17 | 1 | 0.92 | 0.39 | 1 |
| 0.06 | 1       | 1.53 | 0.3  | 0 | 1.38 | 0.53 | 0 |
| 0.07 | 1 b2307 | 1.22 | 0.96 | 0 | 1.5  | 0.56 | 0 |
| 0.08 | 1       | 0.78 | 0.2  | 1 | 1.28 | 0.53 | 0 |
| 0.02 | 1 b1252 | 1    | 0.07 | 1 | 1.24 | 0.64 | 1 |
| 0.07 | 1 b2438 | 1.23 | 0.46 | 0 | 1.51 | 1.27 | 0 |
| 0.08 | 1 b1517 | 1.46 | 0.17 | 1 | 1.33 | 0.57 | 1 |
| 0.09 | 1       | 0.11 | 0.06 | 1 | 0.28 | 0.13 | 1 |
| 0.06 | 1 b2452 | 1.1  | 0.16 | 0 | 1.64 | 1.05 | 0 |
| 0.13 | 1 b3960 | 0.95 | 0.14 | 0 | 1.58 | 0.41 | 0 |
| 0.04 | 1 b0752 | 0.99 | 0.29 | 0 | 1.55 | 0.38 | 0 |
| 0.11 | 1 b0738 | 0.72 | 0.17 | 1 | 1.45 | 1.1  | 0 |
| 0.08 | 1 b2675 | 2.13 | 0.49 | 0 | 1.99 | 0.44 | 0 |
| 0.06 | 1 b1531 | 0.48 | 0.04 | 1 | 0.49 | 0.46 | 1 |
| 0.08 | 0       | 1.54 | 0.32 | 0 | 2.21 | 0.7  | 0 |
| 0.07 | 1 b1326 | 1    | 0.28 | 0 | 1.34 | 0.82 | 0 |
| 0.08 | 1       | 0.33 | 0.05 | 1 | 0.42 | 0.26 | 1 |
| 0.04 | 1 b0190 | 0.97 | 0.14 | 1 | 1.38 | 0.39 | 1 |
| 0.06 | 1 b1130 | 1.25 | 0.23 | 1 | 0.84 | 1.42 | 1 |
| 0.12 | 1 b3998 | 0.88 | 0.14 | 1 | 1.31 | 0.56 | 0 |
| 0.06 | 0       | 1.53 | 0.22 | 0 | 1.76 | 0.64 | 0 |
| 0.06 | 1 b4187 | 2.08 | 0.55 | 1 | 1.09 | 0.69 | 1 |
| 0.06 | 1       | 1.38 | 0.34 | 0 | 2.25 | 0.99 | 0 |
| 0.06 | 1 b1091 | 0.59 | 0.09 | 1 | 0.69 | 0.33 | 1 |
| 0.15 | 1 b1284 | 0.6  | 0.15 | 1 | 1.56 | 0.49 | 1 |
| 0.03 | 1 b1869 | 0.56 | 0.19 | 1 | 1.47 | 3.06 | 1 |
| 0.11 | n/a     | 1.12 | 0.41 | 0 | 2.42 | 1.13 | 0 |
| n/a  | n/a     | n/a  | n/a  | 0 | n/a  | n/a  | 0 |
| 0.09 | 1       | 1.35 | 0.59 | 0 | 1.48 | 0.83 | 0 |
| 0.1  | 1       | 1.38 | 0.18 | 0 | 1.57 | 0.74 | 0 |
| 0.05 | 1 b4001 | 0.65 | 0.15 | 1 | 1.27 | 0.29 | 1 |
| 0.1  | 1 b3843 | 0.41 | 0.07 | 1 | 0.44 | 0.45 | 1 |
| 0.1  | 1 b3817 | 0.97 | 0.26 | 0 | 1.38 | 0.4  | 0 |
| 0.13 | 1 b3781 | 0.96 | 0.12 | 1 | 0.93 | 0.59 | 1 |
| 0.02 | 1 b1224 | 2.18 | 0.56 | 0 | 1.59 | 0.51 | 0 |
| 0.1  | 1 b1809 | 0.66 | 0.42 | 0 | 1.33 | 0.89 | 0 |
| 0.08 | 1 b1251 | 0.7  | 0.11 | 0 | 1.22 | 0.47 | 0 |
| 0.07 | 1 b2836 | 0.49 | 0.17 | 1 | 0.8  | 0.44 | 1 |
| 0.04 | 1       | 1.05 | 0.34 | 0 | 1.46 | 0.49 | 0 |
| 0.12 | 1       | 1.26 | 0.63 | 0 | 1.68 | 0.51 | 0 |
| 0.04 | 1       | 1.41 | 0.38 | 0 | 2.34 | 0.88 | 0 |
| 0.05 | 1 b1469 | 1.39 | 0.32 | 0 | 1.52 | 0.46 | 0 |
| 0.14 | 1       | 0.96 | 0.44 | 0 | 1.49 | 0.73 | 0 |
| 0.06 | 1       | 0.59 | 0.08 | 1 | 1.37 | 0.46 | 1 |
| 0.21 | 0 b3766 | 1.51 | 0.36 | 0 | 1.81 | 0.58 | 0 |
| n/a  | n/a     | n/a  | n/a  | 0 | n/a  | n/a  | 0 |
| 0.06 | 1       | 0.78 | 0.06 | 0 | 1.66 | 0.37 | 0 |
| 0.12 | 0 b1273 | 0.86 | 0.12 | 0 | 1.86 | 0.61 | 0 |
| 0.05 | 1       | 1.32 | 0.38 | 0 | 1.89 | 0.52 | 0 |
| 0.06 | 1 b1846 | 2.06 | 0.49 | 1 | 3.03 | 2.1  | 1 |



|     |      |     |       |      |      |   |      |      |   |
|-----|------|-----|-------|------|------|---|------|------|---|
|     | 0.08 | 1   | b0611 | 0.41 | 0.04 | 1 | 0.67 | 0.55 | 1 |
|     | 0.08 | 1   |       | 1.38 | 0.35 | 0 | 1.57 | 0.33 | 0 |
|     | 0.08 | 1   | b0596 | 1.98 | 0.15 | 1 | 2.2  | 0.75 | 0 |
|     | 0.03 | 1   |       | 1.43 | 0.33 | 0 | 1.31 | 0.34 | 0 |
| n/a | n/a  |     |       | n/a  | n/a  | 0 | n/a  | n/a  | 0 |
|     | 0.03 | 1   | b1451 | 1.36 | 0.35 | 0 | 2.39 | 1.31 | 0 |
|     | 0.06 | 1   |       | 1.57 | 0.83 | 0 | 2.38 | 0.81 | 0 |
|     | 0.05 | 1   |       | 1.43 | 0.32 | 0 | 1.3  | 0.66 | 0 |
|     | 0.09 | 1   | b1858 | 0.89 | 0.28 | 0 | 1.38 | 0.69 | 0 |
|     | 0.05 | 1   | b0865 | 1.39 | 0.22 | 1 | 2.02 | 0.81 | 1 |
|     | 0.05 | 1   | b0511 | 1.31 | 0.37 | 0 | 1.47 | 0.17 | 0 |
|     | 0.08 | 1   | b0512 | 1.28 | 0.15 | 0 | 1.71 | 0.48 | 1 |
|     | 0.04 | 1   | b0891 | 1.04 | 0.11 | 1 | 0.46 | 0.45 | 1 |
|     | 0.05 | 1   | b1414 | 1.8  | 0.21 | 1 | 1.37 | 0.88 | 1 |
| n/a | n/a  |     |       | n/a  | n/a  | 0 | n/a  | n/a  | 0 |
|     | 0.08 | 1   |       | 1.24 | 0.1  | 0 | 1.59 | 0.29 | 0 |
|     | 0.03 | 1   | b1816 | 1.19 | 0.22 | 0 | 1.73 | 0.29 | 0 |
|     | 0.05 | 1   |       | 1.15 | 0.29 | 0 | 1.45 | 0.54 | 0 |
|     | 0.09 | 1   | b3578 | 1.29 | 0.19 | 0 | 2.3  | 0.63 | 0 |
| n/a | n/a  |     |       | n/a  | n/a  | 0 | n/a  | n/a  | 0 |
|     | 0.06 | 1   |       | 1.14 | 0.47 | 0 | 1.59 | 0.41 | 0 |
|     | 0.12 | 1   |       | 0.96 | 0.29 | 0 | 1.29 | 0.48 | 0 |
|     | 0.09 | 1   | b2922 | 0.4  | 0.06 | 1 | 0.43 | 0.5  | 1 |
| n/a | n/a  |     |       | n/a  | n/a  | 0 | n/a  | n/a  | 0 |
| n/a | n/a  |     |       | n/a  | n/a  | 0 | n/a  | n/a  | 0 |
|     | 0.09 | 1   | b2710 | 1.41 | 0.24 | 0 | 1.96 | 1.72 | 0 |
|     | 0.06 | 1   | b2938 | 0.68 | 0.08 | 1 | 0.82 | 1.08 | 1 |
| n/a | n/a  |     |       | n/a  | n/a  | 0 | n/a  | n/a  | 0 |
|     | 0.15 | 0   |       | 1.33 | 0.23 | 0 | 1.71 | 0.98 | 0 |
| n/a | n/a  |     |       | n/a  | n/a  | 0 | n/a  | n/a  | 0 |
|     | 0.05 | n/a | b2965 | 1.01 | 0.16 | 0 | 1.69 | 0.34 | 0 |
|     | 0.04 | 1   | b0444 | 0.54 | 0.12 | 1 | 1.02 | 0.58 | 1 |
|     | 0.12 | 1   | b3494 | 1.51 | 0.11 | 0 | 1.42 | 0.37 | 0 |
|     | 0.15 | 0   | b2959 | 0.61 | 0.14 | 1 | 0.71 | 0.14 | 1 |
|     | 0.07 | n/a |       | 1.09 | 0.56 | 0 | 1.59 | 0.44 | 0 |
|     | 0.09 | 1   | b4235 | 0.72 | 0.16 | 1 | 0.9  | 0.22 | 1 |
|     | 0.08 | 1   | b4376 | 0.98 | 0.19 | 0 | 1.7  | 0.56 | 0 |
|     | 0.09 | 1   | b2681 | 0.94 | 0.2  | 0 | 1.27 | 2.6  | 0 |
|     | 0.04 | 1   | b2076 | 1.39 | 0.35 | 0 | 1.94 | 0.54 | 0 |
|     | 0.04 | 1   | b2176 | 0.63 | 0.32 | 0 | 1.09 | 0.17 | 1 |
|     | 0.06 | 1   | b2043 | 0.88 | 0.3  | 1 | 0.81 | 0.59 | 1 |
|     | 0.08 | 1   | b2079 | 0.76 | 0.11 | 0 | 1.29 | 0.37 | 0 |
|     | 0.07 | 1   | b2159 | 0.9  | 0.2  | 1 | 1.09 | 0.4  | 0 |
|     | 0.03 | 1   | b2066 | 0.34 | 0.12 | 1 | 0.96 | 0.29 | 1 |
|     | 0.08 | 1   | b1831 | 0.22 | 0.02 | 1 | 0.92 | 0.54 | 1 |
|     | 0.11 | 1   | b3606 | 0.98 | 0.38 | 1 | 1.5  | 0.61 | 1 |
|     | 0.11 | 0   | b3552 | 0.6  | 0.47 | 1 | 1.1  | 0.6  | 1 |
|     | 0.06 | 1   | b2152 | 0.99 | 0.09 | 0 | 1.65 | 0.32 | 0 |
|     | 0.06 | 1   | b1212 | 0.57 | 0.06 | 1 | 1.05 | 0.59 | 1 |
|     | 0.1  | 1   |       | 1.22 | 0.36 | 0 | 1.72 | 1.42 | 0 |
|     | 0.08 | n/a |       | 1.08 | 0.27 | 0 | 1.66 | 0.58 | 0 |
|     | 0.09 | 1   | b4185 | 1.27 | 0.39 | 0 | 1.45 | 0.78 | 0 |

|      |     |         |      |      |       |      |       |   |
|------|-----|---------|------|------|-------|------|-------|---|
| 0.09 |     | 1 b3032 | 0.88 | 0.17 | 1     | 0.95 | 0.43  | 1 |
| 0.04 |     | 1 b3157 | 0.8  | 0.18 | 1     | 0.96 | 1.03  | 1 |
| 0.07 |     | 1 b3005 | 2.74 | 0.62 | 1     | 1.5  | 0.81  | 0 |
| 0.12 |     | 1 b2924 | 0.53 | 0.09 | 1     | 0.91 | 0.71  | 1 |
| 0.1  |     | 1 b3207 | 0.92 | 0.21 | 0     | 1.04 | 0.57  | 1 |
| 0.06 |     | 1       | 1.39 | 0.3  | 0     | 1.68 | 0.65  | 0 |
| 0.07 |     | 1 b3011 | 1.35 | 0.11 | 1     | 1.11 | 11.05 | 1 |
| 0.04 |     | 1 b1334 | 1.19 | 0.17 | 1     | 1.03 | 1.82  | 1 |
| 0.08 |     | 1       | 1.34 | 0.22 | 0     | 2.31 | 1.36  | 1 |
| 0.12 |     | 0       | 1.54 | 0.49 | 0     | 1.77 | 0.7   | 0 |
| 0.12 |     | 1 b2936 | 0.67 | 0.1  | 1     | 1.17 | 1.22  | 0 |
| 0.09 |     | 0 b0968 | 1.5  | 0.32 | 0     | 1.11 | 0.69  | 0 |
| 0.04 |     | 1 b0767 | 1.29 | 0.26 | 1     | 1.01 | 9.75  | 1 |
| 0.09 |     | 1 b2949 | 0.77 | 0.16 | 0     | 1.6  | 0.41  | 0 |
| 0.04 |     | 1 b0950 | 0.75 | 0.25 | 1     | 1.26 | 0.35  | 0 |
| 0.06 |     | 1 b0740 | 0.52 | 0.09 | 1     | 0.37 | 0.42  | 1 |
| 0.04 |     | 1 b0776 | 1.23 | 0.16 | 0     | 1.74 | 0.52  | 0 |
| 0.03 |     | 1 b0822 | 0.57 | 0.09 | 1     | 1.05 | 0.28  | 1 |
| 0.03 |     | 1       | 0.75 | 0.17 | 1     | 1.27 | 1.35  | 1 |
| 0.09 |     | 1       | 1.09 | 0.27 | 1     | 0.46 | 0.98  | 1 |
| 0.13 |     | 1       | 1.13 | 0.06 | 1     | 1.16 | 0.46  | 1 |
| 0.09 |     | 1 b2953 | 0.37 | 0.05 | 1     | 0.79 | 0.28  | 1 |
| 0.04 |     | 1 b0471 | 0.48 | 0.11 | 1     | 0.67 | 0.67  | 1 |
| 0.13 |     | 0       | 1.53 | 0.28 | 0     | 2.24 | 0.85  | 0 |
| 0.08 |     | 1 b2498 | 0.47 | 0.09 | 1     | 0.96 | 0.25  | 1 |
| n/a  | n/a |         | n/a  | n/a  | 0 n/a | n/a  |       | 0 |
| 0.11 |     | 1 b2107 | 1.01 | 0.19 | 1     | 1.02 | 0.75  | 1 |
| 0.1  |     | 0       | 1    | 0.48 | 0     | 2.21 | 0.99  | 0 |
| 0.11 |     | 1 b0410 | 0.47 | 0.07 | 1     | 0.44 | 0.4   | 1 |
| 0.15 |     | 1 b3610 | 0.43 | 0.1  | 1     | 0.61 | 0.33  | 1 |
| 0.17 |     | 1 b4189 | 1.96 | 0.34 | 1     | 1.64 | 0.82  | 0 |
| 0.04 |     | 1 b2728 | 1.2  | 0.25 | 0     | 1.76 | 0.49  | 0 |
| 0.06 |     | 1 b1003 | 1.62 | 0.39 | 0     | 2.07 | 0.67  | 0 |
| 0.02 |     | 1       | 2.85 | 0.6  | 1     | 2.13 | 0.69  | 0 |
| 0.07 |     | 1       | 2.39 | 0.53 | 1     | 2.16 | 5.11  | 0 |
| 0.09 |     | 1       | 1.36 | 0.43 | 0     | 1.76 | 1.64  | 0 |
| 0.06 |     | 1       | 0.82 | 0.2  | 0     | 1.46 | 0.48  | 0 |
| 0.15 | n/a |         | 1.31 | 0.22 | 0     | 1.83 | 0.65  | 0 |
| 0.1  |     | 1       | 1.13 | 0.31 | 0     | 1.72 | 10.28 | 0 |
| 0.05 |     | 1       | 1.25 | 0.32 | 0     | 1.43 | 0.51  | 0 |
| 0.06 | n/a |         | 1.31 | 0.27 | 0     | 1.59 | 0.41  | 0 |
| 0.03 |     | 1       | 1.51 | 0.48 | 0     | 1.59 | 31.59 | 0 |
| 0.03 |     | 1 b0054 | 0.3  | 0.03 | 1     | 0.3  | 0.61  | 1 |
| 0.18 |     | 0       | 1.58 | 0.6  | 0     | 1.3  | 3.04  | 0 |
| 0.05 |     | 1       | 1.57 | 0.31 | 0     | 1.74 | 0.41  | 0 |
| 0.08 |     | 1 b1332 | 0.58 | 0.2  | 1     | 1    | 0.8   | 1 |
| 0.07 |     | 1 b1436 | 1.45 | 0.3  | 0     | 1.75 | 0.76  | 0 |
| n/a  | n/a |         | n/a  | n/a  | 0 n/a | n/a  |       | 0 |
| 0.08 |     | 0 b3107 | 1.63 | 0.3  | 0     | 1.92 | 0.66  | 0 |
| n/a  | n/a |         | n/a  | n/a  | 0 n/a | n/a  |       | 0 |
| n/a  | n/a |         | n/a  | n/a  | 0 n/a | n/a  |       | 0 |
| n/a  | n/a |         | n/a  | n/a  | 0 n/a | n/a  |       | 0 |



|     |      |     |       |      |      |   |      |      |   |
|-----|------|-----|-------|------|------|---|------|------|---|
|     | 0.03 | 1   | b0996 | 1.6  | 0.23 | 0 | 1.56 | 0.88 | 0 |
|     | 0.1  | 1   |       | 1.56 | 0.69 | 0 | 1.17 | 0.59 | 0 |
|     | 0.08 | 1   |       | 1.22 | 0.26 | 0 | 1.54 | 0.54 | 0 |
|     | 0.11 | 1   | b0019 | 0.87 | 0.42 | 0 | 1.42 | 0.61 | 0 |
|     | 0.08 | 1   | b0041 | 1.23 | 0.37 | 0 | 1.22 | 0.55 | 0 |
|     | 0.09 | 1   | b3907 | 1    | 0.33 | 0 | 1.28 | 0.48 | 0 |
|     | 0.16 | 1   | b3018 | 0.65 | 0.46 | 1 | 1.23 | 0.37 | 0 |
|     | 0.1  | 1   | b3209 | 1.71 | 0.27 | 1 | 1.56 | 0.15 | 0 |
|     | 0.17 | 0   | b3242 | 1.59 | 0.44 | 0 | 1.57 | 0.64 | 0 |
|     | 0.12 | 1   | b3266 | 1.35 | 0.31 | 0 | 1.66 | 0.38 | 0 |
|     | 0.07 | 1   | b0643 | 1.73 | 0.2  | 1 | 1.51 | 1.79 | 1 |
|     | 0.11 | 1   | b0116 | 0.52 | 0.1  | 1 | 0.2  | 1.75 | 1 |
|     | 0.12 | n/a | b0129 | 1.23 | 0.46 | 0 | 1.58 | 0.6  | 0 |
|     | 0.11 | 1   | b0162 | 2.72 | 0.5  | 1 | 1.38 | 1.13 | 1 |
|     | 0.11 | 1   |       | 0.78 | 0.32 | 0 | 1.36 | 0.31 | 1 |
| n/a | n/a  |     |       | n/a  | n/a  | 0 | n/a  | n/a  | 0 |
| n/a | n/a  |     |       | n/a  | n/a  | 0 | n/a  | n/a  | 0 |
|     | 0.18 | 1   | b3438 | 0.82 | 0.52 | 0 | 1.24 | 0.75 | 1 |
| n/a | n/a  |     |       | n/a  | n/a  | 0 | n/a  | n/a  | 0 |
|     | 0.06 | 1   |       | 1.52 | 0.21 | 0 | 2.29 | 1.14 | 0 |
| n/a | n/a  |     |       | n/a  | n/a  | 0 | n/a  | n/a  | 0 |
| n/a | n/a  |     |       | n/a  | n/a  | 0 | n/a  | n/a  | 0 |
| n/a | n/a  |     |       | n/a  | n/a  | 0 | n/a  | n/a  | 0 |
|     | 0.11 | 1   |       | 1.31 | 0.47 | 0 | 1.62 | 0.8  | 0 |
| n/a | n/a  |     |       | n/a  | n/a  | 0 | n/a  | n/a  | 0 |
|     | 0.15 | 1   | b0223 | 1.09 | 0.11 | 1 | 1.14 | 0.46 | 1 |
|     | 0.12 | 1   |       | 0.85 | 0.33 | 0 | 1.39 | 0.33 | 0 |
|     | 0.08 | 1   |       | 1.19 | 0.27 | 0 | 1.24 | 0.39 | 0 |
|     | 0.07 | 1   | b1033 | 0.34 | 0.16 | 1 | 0.66 | 0.36 | 1 |
| n/a | n/a  |     |       | n/a  | n/a  | 0 | n/a  | n/a  | 0 |
|     | 0.08 | 0   |       | 1.28 | 0.45 | 0 | 1.48 | 0.5  | 0 |
|     | 0.05 | 1   | b1020 | 1.23 | 1.23 | 1 | 1.29 | 0.27 | 1 |
|     | 0.07 | 1   | b1057 | 1.37 | 0.51 | 0 | 1.34 | 0.41 | 0 |
|     | 0.11 | 1   | b1104 | 0.86 | 0.2  | 0 | 1.53 | 0.41 | 0 |
| n/a | n/a  |     |       | n/a  | n/a  | 0 | n/a  | n/a  | 0 |
|     | 0.12 | 1   | b3281 | 0.95 | 0.24 | 1 | 1.25 | 0.39 | 1 |
|     | 0.09 | 1   | b1063 | 1    | 3.31 | 0 | 1.1  | 0.37 | 0 |
|     | 0.11 | 1   | b3409 | 1.2  | 0.42 | 1 | 1.32 | 0.5  | 0 |
| n/a | n/a  |     |       | n/a  | n/a  | 0 | n/a  | n/a  | 0 |
|     | 0.08 | 1   | b3471 | 1.24 | 0.56 | 0 | 1.72 | 0.97 | 0 |
|     | 0.13 | 1   | b1512 | 1.35 | 0.3  | 0 | 1.36 | 0.4  | 0 |
| n/a | n/a  |     |       | n/a  | n/a  | 0 | n/a  | n/a  | 0 |
| n/a | n/a  |     |       | n/a  | n/a  | 0 | n/a  | n/a  | 0 |
|     | 0.12 | 1   |       | 0.47 | 0.3  | 1 | 0.93 | 0.31 | 1 |
|     | 0.12 | 1   | b4077 | 1.13 | 0.24 | 0 | 1.44 | 0.84 | 0 |
|     | 0.17 | 1   | b2746 | 0.52 | 0.07 | 1 | 0.68 | 0.21 | 1 |
|     | 0.1  | 1   | b0848 | 5.67 | 1.32 | 1 | 3.5  | 0.93 | 1 |
|     | 0.08 | 1   | b2324 | 0.9  | 0.54 | 0 | 1.77 | 1.07 | 0 |
| n/a | n/a  |     |       | n/a  | n/a  | 0 | n/a  | n/a  | 0 |
| n/a | n/a  |     |       | n/a  | n/a  | 0 | n/a  | n/a  | 0 |
|     | 0.07 | 1   | b2520 | 1.08 | 0.16 | 0 | 1.36 | 0.34 | 0 |
|     | 0.12 | 1   | b4015 | 0.34 | 0.08 | 1 | 0.24 | 0.37 | 1 |

|     |      |           |     |       |       |     |      |      |   |
|-----|------|-----------|-----|-------|-------|-----|------|------|---|
| n/a | n/a  |           | n/a | n/a   | 0     | n/a | n/a  | 0    |   |
|     | 0.16 | 1 b4071   |     | 1.54  | 0.39  | 0   | 1.55 | 0.54 | 0 |
|     | 0.14 | 1         |     | 1.07  | 0.34  | 0   | 0.89 | 0.48 | 1 |
|     | 0.15 | 1 b4159   |     | 1.26  | 0.23  | 0   | 1.59 | 0.81 | 0 |
|     | 0.12 | 1         |     | 1.76  | 0.34  | 0   | 2.06 | 0.81 | 0 |
|     | 0.09 | 1 b2431   |     | 0.98  | 0.12  | 1   | 0.97 | 0.22 | 0 |
|     | 0.08 | 1 b2477   |     | 0.4   | 0.34  | 1   | 0.39 | 1.94 | 1 |
|     | 0.09 | 0 b1766   |     | 1.04  | 0.58  | 0   | 2.29 | 0.67 | 0 |
|     | 0.07 | 1         |     | 1.3   | 0.28  | 0   | 1.68 | 2.65 | 0 |
|     | 0.22 | 1 b4184   |     | 1.61  | 0.47  | 0   | 1.6  | 0.73 | 0 |
|     | 0.13 | 0 b4222   |     | 1.33  | 0.32  | 1   | 1.21 | 0.3  | 0 |
|     | 0.06 | 1         |     | 1.05  | 0.21  | 0   | 1.91 | 0.26 | 0 |
|     | 0.04 | 0 b2279   |     | 0.86  | 0.37  | 0   | 1.21 | 0.29 | 0 |
|     | 0.08 | 1         |     | 1.13  | 0.46  | 0   | 1.49 | 0.68 | 0 |
|     | 0.1  | 1 b2298   |     | 1.4   | 0.19  | 0   | 1.75 | 0.21 | 0 |
|     | 0.08 | 1         |     | 1.04  | 0.21  | 0   | 1.47 | 0.42 | 0 |
|     | 0.07 | 1 b3115   |     | 1.88  | 0.38  | 0   | 1.81 | 0.44 | 0 |
| n/a | n/a  |           | n/a | n/a   | 0     | n/a | n/a  | 0    |   |
|     | 0.08 | 1 b1047   |     | 1.15  | 0.53  | 0   | 1.42 | 0.59 | 0 |
| n/a | n/a  |           | n/a | n/a   | 0     | n/a | n/a  | 0    |   |
|     | 0.12 | 1 b0330   |     | 0.83  | 0.17  | 0   | 1.25 | 0.45 | 0 |
|     | 0.11 | 1 b1784   |     | 1     | 0.81  | 0   | 1.37 | 0.25 | 0 |
|     | 0.15 | 1 b1660   |     | 0.98  | 0.5   | 0   | 1.34 | 1.29 | 0 |
|     | 0.06 | 1 b4193   |     | 1.62  | 0.35  | 0   | 1.55 | 0.43 | 0 |
| n/a | n/a  |           | n/a | n/a   | 0     | n/a | n/a  | 0    |   |
|     | 0.08 | 1 b2311   |     | 0.93  | 0.21  | 0   | 1.86 | 0.75 | 0 |
|     | 0.08 | 1 b1714   |     | 0.47  | 0.37  | 1   | 0.89 | 1.86 | 0 |
|     | 0.15 | 1 b1681   |     | 17.12 | 10.68 | 1   | 15.6 | 5.56 | 1 |
|     | 0.14 | 1 b4375   |     | 0.3   | 0.21  | 1   | 0.42 | 0.41 | 1 |
|     | 0.15 | 1         |     | 1.41  | 0.34  | 0   | 1.19 | 0.49 | 0 |
|     | 0.06 | 1 b3662   |     | 1.76  | 0.47  | 0   | 1.17 | 0.93 | 0 |
|     | 0.06 | 1 b4035   |     | 1.12  | 0.25  | 0   | 1.36 | 0.45 | 0 |
|     | 0.08 | 1 b3749   |     | 1.68  | 0.38  | 0   | 1.53 | 0.28 | 0 |
|     | 0.09 | 1 b0200   |     | 0.8   | 0.05  | 1   | 0.84 | 0.5  | 1 |
|     | 0.07 | 1 b1960   |     | 1.13  | 0.4   | 0   | 1.57 | 0.49 | 0 |
|     | 0.1  | 1 b4046   |     | 1.02  | 0.4   | 0   | 1.27 | 0.34 | 0 |
|     | 0.09 | n/a b1746 |     | 0.9   | 0.23  | 0   | 1.54 | 0.3  | 0 |
|     | 0.11 | 1 b1743   |     | 1.45  | 0.11  | 0   | 1.33 | 0.6  | 0 |
| n/a | n/a  |           | n/a | n/a   | 0     | n/a | n/a  | 0    |   |
|     | 0.09 | 1 b1644   |     | 0.81  | 0.24  | 0   | 0.95 | 0.22 | 1 |
|     | 0.07 | 1 b1075   |     | 0.47  | 0.31  | 1   | 0.73 | 0.35 | 1 |
|     | 0.09 | 1 b2039   |     | 0.88  | 0.56  | 1   | 0.95 | 0.37 | 1 |
|     | 0.17 | 1         |     | 0.75  | 0.1   | 1   | 0.73 | 0.38 | 1 |
|     | 0.12 | 1 b4329   |     | 1.2   | 0.58  | 0   | 1.5  | 0.73 | 0 |
|     | 0.11 | 1         |     | 1.38  | 0.4   | 0   | 1.75 | 0.69 | 0 |
|     | 0.14 | 1 b3531   |     | 0.9   | 0.31  | 0   | 1.1  | 0.63 | 0 |
|     | 0.1  | 1 b3154   |     | 1.13  | 0.37  | 0   | 1.52 | 0.67 | 0 |
|     | 0.07 | 1 b2261   |     | 0.83  | 0.2   | 1   | 1    | 0.23 | 1 |
|     | 0.06 | 1 b2243   |     | 3.76  | 0.43  | 1   | 2.21 | 1.12 | 1 |
|     | 0.1  | 0 b2480   |     | 0.53  | 0.19  | 1   | 1.02 | 0.28 | 0 |
|     | 0.08 | 1 b0493   |     | 0.86  | 0.38  | 0   | 1.27 | 0.17 | 0 |
| n/a | n/a  |           | n/a | n/a   | 0     | n/a | n/a  | 0    |   |

|     |          |         |     |      |      |     |      |       |
|-----|----------|---------|-----|------|------|-----|------|-------|
| n/a | n/a      |         | n/a | n/a  | 0    | n/a | n/a  | 0     |
|     | 0.09     | 1 b3653 |     | 1.08 | 0.32 | 1   | 1.23 | 0.58  |
|     | 0.17     | 1       |     | 1.18 | 0.38 | 0   | 1.69 | 1.35  |
|     | 0.14     | 1       |     | 1.49 | 0.24 | 1   | 1.68 | 0.6   |
|     | 0.14     | 1 b3440 |     | 1.06 | 0.11 | 0   | 1.69 | 0.79  |
| n/a | n/a      |         | n/a | n/a  | 0    | n/a | n/a  | 0     |
|     | 0.11     | 1       |     | 1.32 | 0.19 | 0   | 1.29 | 0.38  |
|     | 0.14     | 1 b4255 |     | 1.39 | 0.35 | 0   | 1.09 | 0.74  |
|     | 0.19     | 1       |     | 1.52 | 0.41 | 0   | 1.93 | 0.99  |
|     | 0.13     | 1 b4245 |     | 0.52 | 0.09 | 1   | 0.94 | 0.34  |
|     | 0.18     | 1 b3940 |     | 1.07 | 0.31 | 0   | 1.54 | 0.58  |
|     | 0.11     | 1 b0698 |     | 1.33 | 0.24 | 0   | 1.49 | 0.64  |
|     | 0.07     | 1 b0712 |     | 0.82 | 0.21 | 1   | 1.17 | 0.43  |
|     | 0.08     | 1       |     | 0.95 | 0.23 | 1   | 0.64 | 7.2   |
|     | 0.1      | 1 b2557 |     | 0.52 | 0.19 | 1   | 1.1  | 1.5   |
|     | 0.09     | 1 b3906 |     | 1.34 | 0.57 | 0   | 1.4  | 0.32  |
|     | 0.1 n/a  | b0639   |     | 1.1  | 0.45 | 0   | 1.1  | 0.18  |
|     | 0.11     | 1       |     | 1.32 | 0.29 | 0   | 1.62 | 0.34  |
|     | 0.06     | 1       |     | 5.81 | 1.41 | 1   | 2.93 | 1.13  |
|     | 0.03     | 1 b3405 |     | 0.31 | 3.13 | 1   | 0.4  | 0.11  |
|     | 0.08     | 1 b1291 |     | 1.01 | 0.19 | 1   | 1.1  | 0.46  |
|     | 0.06     | 1 b0071 |     | 1.53 | 0.47 | 0   | 2.07 | 0.96  |
|     | 0.08     | 1 b1241 |     | 1.23 | 0.26 | 1   | 0.94 | 0.43  |
|     | 0.14     | 1       |     | 0.8  | 0.56 | 1   | 0.83 | 15.65 |
|     | 0.09     | 1 b2451 |     | 1.28 | 0.58 | 0   | 1.16 | 0.65  |
|     | 0.08     | 1 b3888 |     | 0.71 | 0.15 | 1   | 1.03 | 0.42  |
|     | 0.11     | 1       |     | 0.81 | 0.26 | 0   | 1.42 | 4.24  |
|     | 0.11     | 1 b3995 |     | 1.01 | 0.43 | 1   | 1.52 | 0.6   |
|     | 0.1      | 1 b3881 |     | 1.19 | 0.33 | 0   | 1.52 | 0.74  |
|     | 0.21     | 1       |     | 1.45 | 0.38 | 1   | 1.52 | 1.62  |
|     | 0.08     | 0       |     | 0.93 | 0.2  | 0   | 1.38 | 0.37  |
|     | 0.1      | 0 b1089 |     | 0.56 | 0.17 | 1   | 0.45 | 0.68  |
|     | 0.08     | 1 b1324 |     | 0.86 | 0.25 | 1   | 0.6  | 0.43  |
|     | 0.07     | 1 b2501 |     | 0.71 | 0.22 | 0   | 0.99 | 0.18  |
|     | 0.24     | 0       |     | 1.27 | 0.24 | 0   | 1.47 | 0.59  |
|     | 0.1      | 1 b3628 |     | 2.2  | 0.46 | 1   | 1.54 | 0.57  |
|     | 0.12 n/a |         |     | 0.98 | 0.07 | 0   | 1.56 | 0.61  |
|     | 0.15     | 1 b3991 |     | 1.38 | 0.38 | 0   | 1.43 | 0.27  |
|     | 0.17     | 0       |     | 1.68 | 0.46 | 0   | 1.84 | 0.44  |
|     | 0.06     | 0       |     | 2.04 | 0.5  | 0   | 1.95 | 0.74  |
|     | 0.18     | 0 b3737 |     | 0.26 | 0.03 | 1   | 0.65 | 0.88  |
|     | 0.07     | 1       |     | 1.09 | 0.4  | 0   | 1.74 | 1.11  |
|     | 0.13     | 1 b4115 |     | 0.81 | 0.26 | 0   | 1.34 | 0.5   |
|     | 0.09     | 1       |     | 1.45 | 0.35 | 0   | 1.88 | 1.6   |
|     | 0.07     | 1 b1276 |     | 4.96 | 1.21 | 1   | 8.09 | 7.01  |
|     | 0.04     | 1 b2601 |     | 1    | 0.1  | 1   | 1.18 | 3.13  |
|     | 0.07     | 1 b2787 |     | 4.03 | 0.86 | 1   | 2.74 | 1.36  |
|     | 0.06     | 1       |     | 1.29 | 0.39 | 0   | 1.55 | 0.34  |
|     | 0.11     | 1 b3842 |     | 0.56 | 0.21 | 1   | 1.13 | 0.29  |
|     | 0.09     | 1       |     | 0.75 | 0.17 | 1   | 1.12 | 0.32  |
|     | 0.13 n/a | b3789   |     | 1.28 | 0.18 | 0   | 1.76 | 0.62  |
|     | 0.09     | 1       |     | 1.34 | 0.21 | 0   | 1.34 | 0.27  |

|     |          |         |      |      |       |      |      |   |
|-----|----------|---------|------|------|-------|------|------|---|
|     | 0.08     | 1 b3778 | 0.87 | 0.34 | 0     | 1.34 | 0.68 | 0 |
|     | 0.04     | 1 b0067 | 1.61 | 0.5  | 0     | 1.57 | 0.42 | 0 |
|     | 0.05     | 1 b1242 | 0.97 | 0.16 | 0     | 1.48 | 0.33 | 0 |
|     | 0.04     | 1       | 1.56 | 0.51 | 0     | 1.67 | 0.48 | 0 |
|     | 0.03     | 1 b2827 | 0.55 | 0.08 | 1     | 0.51 | 0.24 | 1 |
|     | 0.06     | 1 b1246 | 1.18 | 0.31 | 1     | 1.09 | 0.48 | 0 |
|     | 0.14     | 1       | 0.89 | 0.36 | 0     | 1.32 | 0.28 | 0 |
|     | 0.08     | 1 b3819 | 0.65 | 0.5  | 0     | 1.54 | 0.72 | 0 |
|     | 0.12     | 1       | 1.15 | 0.37 | 0     | 1.57 | 0.59 | 0 |
| n/a | n/a      |         | n/a  | n/a  | 0 n/a | n/a  |      | 0 |
|     | 0.08     | 1 b1188 | 1.24 | 0.49 | 0     | 1.09 | 0.36 | 1 |
|     | 0.07     | 1 b1232 | 0.39 | 0.41 | 1     | 0.48 | 0.63 | 1 |
|     | 0.12     | 1 b1444 | 1.13 | 0.18 | 1     | 1.32 | 1.9  | 1 |
|     | 0.07     | 1 b1830 | 0.3  | 0.1  | 1     | 0.33 | 0.27 | 1 |
|     | 0.05     | 1 b1856 | 0.16 | 0.03 | 1     | 0.37 | 0.57 | 1 |
|     | 0.11     | 1 b0492 | 0.72 | 0.27 | 1     | 0.94 | 0.39 | 1 |
|     | 0.11     | 1 b0516 | 1.58 | 0.39 | 0     | 1.33 | 0.45 | 0 |
|     | 0.09     | 1 b0520 | 1.38 | 0.26 | 0     | 1.52 | 0.55 | 0 |
|     | 0.09     | 1 b0579 | 0.78 | 0.19 | 1     | 0.99 | 0.54 | 1 |
|     | 0.05     | 1 b0610 | 0.57 | 0.12 | 1     | 0.74 | 0.38 | 1 |
| n/a | n/a      |         | n/a  | n/a  | 0 n/a | n/a  |      | 0 |
|     | 0.08     | 1       | 1.75 | 0.26 | 0     | 1.91 | 0.33 | 0 |
|     | 0.09     | 1       | 1.57 | 0.31 | 0     | 1.48 | 0.98 | 0 |
|     | 0.08     | 1       | 1.23 | 0.28 | 0     | 1.29 | 0.21 | 0 |
|     | 0.08 n/a |         | 1.03 | 0.22 | 0     | 1.31 | 1.49 | 0 |
|     | 0.1      | 1 b1325 | 1.01 | 0.17 | 1     | 1.07 | 1.09 | 0 |
|     | 0.48     | 1 b0484 | 2.16 | 0.61 | 1     | 2.07 | 0.64 | 0 |
|     | 0.07     | 1 b1528 | 1.14 | 0.34 | 0     | 1.25 | 0.39 | 0 |
|     | 0.07     | 1       | 1.16 | 0.4  | 0     | 1.31 | 0.44 | 0 |
| n/a | n/a      |         | n/a  | n/a  | 0 n/a | n/a  |      | 0 |
|     | 0.13     | 1 b0426 | 0.46 | 0.05 | 1     | 0.52 | 0.76 | 1 |
|     | 0.07     | 1 b3474 | 1.14 | 0.2  | 0     | 1.27 | 0.5  | 0 |
|     | 0.14 n/a |         | 0.94 | 0.26 | 0     | 1.48 | 0.42 | 0 |
|     | 0.08     | 1 b3579 | 0.96 | 1.34 | 0     | 1.31 | 0.58 | 0 |
|     | 0.09     | 1 b3641 | 0.65 | 0.54 | 0     | 1.3  | 0.29 | 0 |
|     | 2.61     | 1 b3647 | 0.96 | 0.24 | 0     | 1.26 | 0.52 | 0 |
|     | 0.13     | 1 b2803 | 1.57 | 0.44 | 1     | 1.56 | 0.39 | 0 |
|     | 0.1 n/a  |         | 1.38 | 0.22 | 0     | 1.65 | 0.4  | 0 |
|     | 0.04     | 1 b0398 | 1.03 | 0.33 | 0     | 1.62 | 0.25 | 0 |
|     | 0.11     | 1       | 1.98 | 0.39 | 1     | 1.21 | 0.3  | 1 |
|     | 0.08 n/a |         | 1.38 | 0.16 | 1     | 1.26 | 0.49 | 1 |
|     | 0.08     | 1       | 0.47 | 0.17 | 1     | 1    | 0.42 | 1 |
|     | 0.14 n/a |         | 2.68 | 0.86 | 1     | 1.43 | 0.51 | 0 |
|     | 0.08     | 1       | 1.25 | 0.32 | 0     | 1.01 | 0.7  | 1 |
|     | 0.05 n/a |         | 1.12 | 0.25 | 0     | 1.11 | 0.32 | 1 |
|     | 0.11     | 1 b0421 | 0.45 | 0.21 | 1     | 0.65 | 0.49 | 1 |
|     | 0.1      | 1 b3012 | 1.27 | 0.13 | 1     | 1.02 | 0.45 | 1 |
| n/a | n/a      |         | n/a  | n/a  | 0 n/a | n/a  |      | 0 |
|     | 0.1      | 1 b2124 | 0.9  | 0.52 | 0     | 1.61 | 0.76 | 0 |
|     | 0.04     | 1 b0874 | 0.79 | 0.59 | 0     | 1.33 | 1.14 | 0 |
|     | 0.12     | 1       | 1.07 | 0.13 | 1     | 0.92 | 0.27 | 1 |
|     | 0.09     | 1 b4148 | 1.25 | 0.29 | 0     | 1.75 | 0.48 | 0 |

|          |         |     |      |      |       |      |      |   |
|----------|---------|-----|------|------|-------|------|------|---|
| 0.14     | 1       |     | 0.58 | 0.47 | 1     | 0.34 | 0.45 | 1 |
| 0.15     | 1 b3318 |     | 0.27 | 0.06 | 1     | 0.17 | 1.06 | 1 |
| 0.09     | 1 b4168 |     | 1.13 | 0.18 | 0     | 1.41 | 0.35 | 0 |
| 0.18 n/a | b3167   |     | 1.26 | 0.19 | 0     | 1.5  | 0.46 | 0 |
| 0.07     | 1 b3052 |     | 0.52 | 0.47 | 1     | 0.86 | 0.28 | 1 |
| 0.05     | 1       |     | 1.31 | 0.25 | 1     | 1.18 | 0.67 | 1 |
| 0.06     | 1       |     | 1.23 | 0.34 | 0     | 1.89 | 0.73 | 0 |
| 0.13     | 1 b4392 |     | 0.55 | 0.3  | 1     | 0.86 | 0.72 | 1 |
| 0.04     | 1 b0377 |     | 1.11 | 0.1  | 0     | 1.29 | 0.77 | 0 |
| 0.04 n/a | b2173   |     | 0.54 | 0.1  | 1     | 1.1  | 0.97 | 1 |
| 0.11     | 1       |     | 0.85 | 0.89 | 1     | 1    | 0.78 | 1 |
| 0.05     | 1 b2109 |     | 1.37 | 0.22 | 0     | 1.37 | 0.97 | 0 |
| 0.13     | 1       |     | 0.87 | 0.54 | 0     | 0.95 | 0.49 | 0 |
| 0.09 n/a | b2964   |     | 1.63 | 0.37 | 1     | 1.18 | 0.88 | 0 |
| 0.11     | 1 b2916 |     | 0.67 | 0.19 | 1     | 1.21 | 0.16 | 0 |
| 0.07     | 1 b0742 |     | 0.23 | 0.04 | 1     | 0.2  | 0.72 | 1 |
| 0.07     | 1 b0797 |     | 0.98 | 0.35 | 0     | 1.46 | 0.45 | 0 |
| 0.15     | 1       |     | 0.55 | 0.09 | 1     | 0.72 | 0.46 | 1 |
| 0.07     | 1 b1078 |     | 0.5  | 0.11 | 1     | 0.78 | 0.32 | 1 |
| 0.08     | 1 b0773 |     | 0.77 | 0.06 | 1     | 1.5  | 0.71 | 0 |
| n/a      | n/a     | n/a | n/a  | n/a  | 0 n/a | n/a  | n/a  | 0 |
| 0.06     | 1 b3199 |     | 0.74 | 0.21 | 1     | 0.56 | 0.61 | 1 |
| 0.05     | 1       |     | 3.45 | 0.46 | 1     | 2.77 | 1    | 1 |
| 0.09     | 1 b2952 |     | 0.41 | 0.08 | 1     | 1.01 | 1.15 | 1 |
| 0.06     | 1 b1914 |     | 0.48 | 0.08 | 1     | 0.83 | 0.35 | 1 |
| 0.16     | 1 b3212 |     | 0.92 | 0.23 | 0     | 1.51 | 0.33 | 0 |
| 0.13     | 1       |     | 1.56 | 0.55 | 0     | 1.55 | 0.55 | 0 |
| 0.12     | 1 b3067 |     | 0.76 | 0.09 | 1     | 0.48 | 1.08 | 1 |
| 0.1      | 1       |     | 1.38 | 0.79 | 0     | 1.88 | 0.87 | 0 |
| n/a      | n/a     | n/a | n/a  | n/a  | 0 n/a | n/a  | n/a  | 0 |
| n/a      | n/a     | n/a | n/a  | n/a  | 0 n/a | n/a  | n/a  | 0 |
| 0.11     | 1       |     | 1.68 | 0.2  | 1     | 0.44 | 1.18 | 1 |
| 0.22     | 1       |     | 0.6  | 0.08 | 1     | 1.1  | 0.5  | 1 |
| 0.06     | 1 b2669 |     | 0.49 | 0.13 | 1     | 0.58 | 1.46 | 1 |
| 0.27     | 1 b3636 |     | 0.34 | 0.14 | 1     | 0.65 | 0.32 | 1 |
| 0.09     | 1 b2609 |     | 0.44 | 0.03 | 1     | 0.25 | 0.8  | 1 |
| 0.08     | 1 b0528 |     | 0.86 | 0.14 | 0     | 1.28 | 0.43 | 0 |
| 0.05     | 1 b1282 |     | 0.62 | 0.13 | 1     | 0.51 | 0.13 | 1 |
| n/a      | n/a     | n/a | n/a  | n/a  | 0 n/a | n/a  | n/a  | 0 |
| 0.05     | 1 b1930 |     | 1.03 | 0.3  | 0     | 1.61 | 0.43 | 0 |
| 0.08     | 1 b1446 |     | 1.33 | 0.2  | 1     | 1.6  | 1.61 | 0 |
| 0.09 n/a |         |     | 1.2  | 0.25 | 0     | 1.61 | 0.66 | 0 |
| 0.08     | 1 b3775 |     | 0.62 | 0.11 | 1     | 0.78 | 0.28 | 1 |
| 0.13     | 1 b0912 |     | 0.46 | 0.05 | 1     | 0.63 | 0.28 | 1 |
| n/a      | n/a     | n/a | n/a  | n/a  | 0 n/a | n/a  | n/a  | 0 |
| 0.13     | 1 b3581 |     | 1.45 | 0.22 | 0     | 1.67 | 0.31 | 0 |
| n/a      | n/a     | n/a | n/a  | n/a  | 0 n/a | n/a  | n/a  | 0 |
| n/a      | n/a     | n/a | n/a  | n/a  | 0 n/a | n/a  | n/a  | 0 |
| 0.1 n/a  |         |     | 1.13 | 0.28 | 0     | 1.28 | 0.7  | 0 |
| 0.22     | 1       |     | 1.17 | 0.37 | 0     | 1.72 | 0.76 | 0 |
| 0.12     | 1 b4402 |     | 1.49 | 0.31 | 1     | 1.17 | 0.45 | 1 |
| 0.13     | 0 b0001 |     | 1.3  | 0.56 | 0     | 2.31 | 0.73 | 0 |



|     |      |     |       |      |       |     |      |      |   |
|-----|------|-----|-------|------|-------|-----|------|------|---|
| n/a | n/a  |     | n/a   | n/a  | 0     | n/a | n/a  | 0    |   |
| n/a | n/a  |     | n/a   | n/a  | 0     | n/a | n/a  | 0    |   |
| n/a | n/a  |     | n/a   | n/a  | 0     | n/a | n/a  | 0    |   |
|     | 0.13 | 1   | b3049 | 1.41 | 0.33  | 0   | 1.26 | 0.41 | 0 |
|     | 0.06 | 1   | b3175 | 0.35 | 0.05  | 1   | 0.22 | 0.61 | 1 |
|     | 0.06 | 1   |       | 0.84 | 0.45  | 1   | 1.18 | 0.59 | 0 |
| n/a | n/a  |     | n/a   | n/a  | 0     | n/a | n/a  | 0    |   |
| n/a | n/a  |     | n/a   | n/a  | 0     | n/a | n/a  | 0    |   |
|     | 0.04 | 1   |       | 1.45 | 0.33  | 0   | 1.38 | 0.59 | 0 |
| n/a | n/a  |     | n/a   | n/a  | 0     | n/a | n/a  | 0    |   |
| n/a | n/a  |     | n/a   | n/a  | 0     | n/a | n/a  | 0    |   |
| n/a | n/a  |     | n/a   | n/a  | 0     | n/a | n/a  | 0    |   |
| n/a | n/a  |     | n/a   | n/a  | 0     | n/a | n/a  | 0    |   |
| n/a | n/a  |     | n/a   | n/a  | 0     | n/a | n/a  | 0    |   |
| n/a | 0.07 | n/a | b1816 | 1.01 | 0.21  | 0   | 1.39 | 0.71 | 0 |
| n/a | n/a  |     | n/a   | n/a  | 0     | n/a | n/a  | 0    |   |
|     | 0.09 | 1   |       | 1.27 | 0.3   | 0   | 1.32 | 0.53 | 0 |
|     | 0.12 | n/a |       | 1.46 | 12.74 | 0   | 1.54 | 0.47 | 0 |
|     | 0.05 | n/a | b2063 | 0.67 | 0.2   | 1   | 0.77 | 0.39 | 1 |
|     | 0.09 | n/a |       | 0.68 | 0.67  | 0   | 1.31 | 0.52 | 0 |
|     | 0.05 | n/a |       | 2.13 | 0.61  | 1   | 1.5  | 0.53 | 0 |
|     | 0.08 | n/a | b3030 | 0.41 | 0.05  | 1   | 0.61 | 0.48 | 1 |
|     | 0.08 | n/a |       | 0.97 | 0.17  | 1   | 1.45 | 0.36 | 0 |
|     | 0.07 | n/a | b3213 | 1.39 | 0.39  | 1   | 1.23 | 0.49 | 0 |
| n/a | n/a  |     | n/a   | n/a  | 0     | n/a | n/a  | 0    |   |
| n/a | n/a  |     | n/a   | n/a  | 0     | n/a | n/a  | 0    |   |
|     | 0.13 | 1   |       | 1.47 | 0.51  | 0   | 1.87 | 0.45 | 0 |
|     | 0.11 | 1   |       | 1.52 | 0.48  | 0   | 2.03 | 0.75 | 0 |
|     | 0.08 | 1   |       | 0.81 | 0.22  | 1   | 0.73 | 1.67 | 1 |
|     | 0.08 | 1   |       | 1.24 | 0.48  | 1   | 1.81 | 1.48 | 1 |
|     | 0.1  | 1   |       | 0.89 | 0.43  | 0   | 1.37 | 0.37 | 0 |
|     | 0.07 | 1   |       | 0.98 | 0.19  | 0   | 1.22 | 0.34 | 0 |
|     | 0.08 | 1   |       | 1.14 | 0.2   | 0   | 1.18 | 1    | 1 |
|     | 0.15 | 1   |       | 1.32 | 0.25  | 1   | 1.22 | 0.25 | 0 |
|     | 0.07 | n/a |       | 1.09 | 0.2   | 0   | 1.81 | 0.4  | 0 |
|     | 0.07 | n/a |       | 1.1  | 0.19  | 1   | 0.98 | 0.62 | 1 |
|     | 0.05 | 1   |       | 1.25 | 1.22  | 1   | 1.43 | 0.63 | 1 |
|     | 0.06 | 1   |       | 1.24 | 0.47  | 0   | 1.56 | 0.41 | 0 |
|     | 0.08 | 1   |       | 1.35 | 0.15  | 0   | 1.63 | 0.3  | 0 |
|     | 0.08 | 1   |       | 1.23 | 0.28  | 0   | 1.83 | 0.46 | 0 |
|     | 0.09 | n/a |       | 0.89 | 0.26  | 1   | 0.99 | 1.02 | 1 |
|     | 0.12 | 1   |       | 2.2  | 0.46  | 1   | 1.11 | 0.52 | 1 |
|     | 0.05 | 1   |       | 1.3  | 0.37  | 0   | 2.1  | 0.85 | 0 |
|     | 0.05 | 1   |       | 1.26 | 0.38  | 0   | 1.39 | 0.7  | 0 |
|     | 0.13 | 1   |       | 1.1  | 0.22  | 0   | 1.44 | 0.44 | 0 |
|     | 0.05 | 1   |       | 0.84 | 0.23  | 0   | 1.42 | 0.55 | 0 |
|     | 0.1  | n/a |       | 1.24 | 0.33  | 0   | 1.63 | 0.68 | 0 |
|     | 0.09 | n/a |       | 1.22 | 1.65  | 1   | 1.61 | 1.14 | 0 |
|     | 0.09 | 1   |       | 0.98 | 0.09  | 1   | 1.34 | 0.73 | 0 |
|     | 0.07 | 1   |       | 0.5  | 0.07  | 1   | 0.68 | 0.56 | 1 |
|     | 0.05 | 1   |       | 0.98 | 0.35  | 1   | 1.23 | 1.35 | 0 |

|     |      |     |       |      |      |   |      |      |   |
|-----|------|-----|-------|------|------|---|------|------|---|
|     | 0.07 | 1   |       | 1.2  | 0.2  | 0 | 1.35 | 0.77 | 0 |
|     | 0.1  | 1   |       | 2.05 | 0.24 | 1 | 0.97 | 0.65 | 1 |
|     | 0.23 | 1   |       | 1.09 | 0.3  | 0 | 1.9  | 1.53 | 0 |
|     | 0.13 | 1   |       | 1.91 | 0.8  | 1 | 1.83 | 0.28 | 0 |
|     | 0.1  | 1   |       | 0.87 | 0.47 | 1 | 0.9  | 0.62 | 1 |
| n/a | n/a  |     | n/a   | n/a  |      | 0 | n/a  | n/a  | 0 |
| n/a | n/a  |     | n/a   | n/a  |      | 0 | n/a  | n/a  | 0 |
| n/a | n/a  |     | n/a   | n/a  |      | 0 | n/a  | n/a  | 0 |
| n/a | n/a  |     | n/a   | n/a  |      | 0 | n/a  | n/a  | 0 |
| n/a | n/a  |     | n/a   | n/a  |      | 0 | n/a  | n/a  | 0 |
| n/a | n/a  |     | n/a   | n/a  |      | 0 | n/a  | n/a  | 0 |
|     | 0.1  | n/a | b0695 | 1.13 | 0.47 | 0 | 1.37 | 0.41 | 1 |
|     | 0.13 | 1   |       | 1.48 | 0.41 | 0 | 1.11 | 0.74 | 0 |
|     | 0.06 | 1   | b3727 | 0.93 | 0.23 | 1 | 1.15 | 0.5  | 0 |
|     | 0.11 | 1   | b3755 | 1.05 | 0.29 | 1 | 0.95 | 1.02 | 1 |
|     | 0.09 | 1   | b1209 | 0.61 | 0.25 | 1 | 1.04 | 2.4  | 1 |
|     | 0.14 | 1   | b0072 | 1.24 | 0.14 | 0 | 1.5  | 0.46 | 0 |
|     | 0.1  | 1   |       | 1.2  | 0.43 | 0 | 1.33 | 0.25 | 1 |
|     | 0.15 | 1   | b0081 | 1.01 | 0.4  | 0 | 0.97 | 0.16 | 1 |
|     | 0.06 | 1   | b0112 | 1.43 | 0.33 | 0 | 1.33 | 0.31 | 0 |
| n/a | n/a  |     | n/a   | n/a  |      | 0 | n/a  | n/a  | 0 |
| n/a | n/a  |     | n/a   | n/a  |      | 0 | n/a  | n/a  | 0 |
|     | 0.27 | 0   |       | 1.52 | 0.43 | 0 | 1.63 | 0.82 | 0 |
|     | 0.09 | 1   | b3232 | 0.54 | 0.15 | 1 | 0.67 | 0.19 | 1 |
|     | 0.09 | 1   | b3257 | 0.7  | 0.65 | 0 | 1.67 | 0.87 | 0 |
|     | 0.11 | 1   | b0641 | 0.49 | 0.08 | 1 | 0.61 | 0.25 | 1 |
|     | 0.05 | 1   | b0662 | 0.99 | 0.25 | 1 | 1.17 | 0.9  | 1 |
|     | 0.06 | 1   | b0692 | 1.39 | 0.37 | 0 | 1.49 | 0.26 | 0 |
|     | 0.14 | 1   |       | 1.18 | 0.27 | 0 | 0.77 | 0.6  | 1 |
|     | 0.08 | 1   | b1783 | 1    | 0.18 | 0 | 1.33 | 0.3  | 1 |
|     | 0.08 | n/a | b2059 | 1.17 | 0.49 | 0 | 1.3  | 0.34 | 0 |
|     | 0.15 | 1   |       | 1.2  | 0.24 | 0 | 1.87 | 0.59 | 0 |
| n/a | n/a  |     | n/a   | n/a  |      | 0 | n/a  | n/a  | 0 |
| n/a | n/a  |     | n/a   | n/a  |      | 0 | n/a  | n/a  | 0 |
|     | 0.18 | 1   | b2662 | 1.14 | 0.32 | 0 | 1.27 | 0.41 | 0 |
|     | 0.15 | 1   |       | 1.39 | 1.2  | 0 | 1.3  | 0.25 | 0 |
| n/a | n/a  |     | n/a   | n/a  |      | 0 | n/a  | n/a  | 0 |
| n/a | n/a  |     | n/a   | n/a  |      | 0 | n/a  | n/a  | 0 |
|     | 0.08 | 1   | b0932 | 1.1  | 0.11 | 1 | 0.48 | 0.14 | 1 |
|     | 0.07 | 1   | b1591 | 1.25 | 0.29 | 0 | 1.38 | 0.6  | 0 |
|     | 0.15 | 1   | b3346 | 0.37 | 0.39 | 1 | 0.34 | 0.09 | 1 |
|     | 0.07 | 1   | b0947 | 0.67 | 1.41 | 1 | 1.03 | 0.27 | 1 |
|     | 0.03 | 1   | b1630 | 1.1  | 1.25 | 0 | 1.66 | 0.89 | 1 |
|     | 0.06 | 1   | b3301 | 0.41 | 0.08 | 1 | 0.2  | 0.06 | 1 |
|     | 0.16 | 1   | b3358 | 0.75 | 0.23 | 1 | 0.83 | 0.22 | 1 |
|     | 0.06 | 1   | b3403 | 0.8  | 0.18 | 1 | 0.26 | 0.08 | 1 |
|     | 0.11 | 1   |       | 1.2  | 0.2  | 0 | 1.15 | 0.54 | 1 |
|     | 0.07 | n/a |       | 2.16 | 0.53 | 1 | 1.36 | 0.27 | 0 |
|     | 0.06 | 1   | b1097 | 0.8  | 0.36 | 0 | 1.11 | 0.22 | 0 |
|     | 0.06 | 1   | b1117 | 0.69 | 0.34 | 0 | 1.47 | 0.37 | 0 |
|     | 0.06 | 1   | b3437 | 1.61 | 0.35 | 0 | 1.61 | 0.31 | 0 |
| n/a | n/a  |     | n/a   | n/a  |      | 0 | n/a  | n/a  | 0 |

|     |      |         |     |      |      |     |      |      |   |
|-----|------|---------|-----|------|------|-----|------|------|---|
| n/a | n/a  |         | n/a | n/a  | 0    | n/a | n/a  | 0    |   |
|     | 0.1  | 1       |     | 1.04 | 0.37 | 0   | 1.46 | 0.32 | 0 |
|     | 0.06 | 1 b3930 |     | 0.81 | 0.19 | 1   | 1.38 | 0.48 | 1 |
|     | 0.08 | 1 b3965 |     | 0.65 | 1.02 | 1   | 0.5  | 0.17 | 1 |
|     | 0.12 | 1       |     | 1.36 | 0.74 | 0   | 1.49 | 0.17 | 0 |
|     | 0.1  | 1       |     | 0.99 | 1.22 | 0   | 1.51 | 0.82 | 0 |
|     | 0.07 | 1 b2344 |     | 0.92 | 0.6  | 1   | 1    | 0.36 | 1 |
|     | 0.09 | 1 b0864 |     | 0.96 | 0.38 | 0   | 0.98 | 0.3  | 1 |
|     | 0.05 | 1 b2463 |     | 0.56 | 0.08 | 1   | 0.24 | 0.07 | 1 |
|     | 0.07 | 1 b2494 |     | 0.57 | 0.08 | 1   | 0.52 | 0.13 | 1 |
|     | 0.1  | 1       |     | 1.07 | 0.17 | 0   | 1.6  | 0.62 | 0 |
|     | 0.08 | n/a     |     | 1.14 | 0.18 | 0   | 1.3  | 0.23 | 0 |
|     | 0.11 | 1       |     | 1.33 | 0.39 | 0   | 1.41 | 0.52 | 0 |
| n/a | n/a  |         | n/a | n/a  |      | 0   | n/a  | n/a  | 0 |
|     | 0.09 | 1 b2743 |     | 0.68 | 0.29 | 1   | 0.91 | 0.4  | 1 |
|     | 0.13 | 1 b2780 |     | 0.24 | 0.13 | 1   | 0.27 | 0.27 | 1 |
| n/a | n/a  |         | n/a | n/a  |      | 0   | n/a  | n/a  | 0 |
| n/a | n/a  |         | n/a | n/a  |      | 0   | n/a  | n/a  | 0 |
| n/a | n/a  |         | n/a | n/a  |      | 0   | n/a  | n/a  | 0 |
|     | 0.04 | 1 b1740 |     | 0.88 | 0.25 | 1   | 0.63 | 0.2  | 1 |
|     | 0.04 | 1 b1649 |     | 1.41 | 0.58 | 0   | 1.38 | 0.38 | 0 |
|     | 0.1  | 0 b1953 |     | 1.59 | 0.62 | 0   | 1.84 | 0.34 | 0 |
| n/a | n/a  |         | n/a | n/a  |      | 0   | n/a  | n/a  | 0 |
|     | 0.07 | 1 b2242 |     | 5.11 | 1.5  | 1   | 2.09 | 0.8  | 1 |
|     | 0.06 | 1       |     | 2.51 | 0.4  | 1   | 1.16 | 0.39 | 1 |
| n/a | n/a  |         | n/a | n/a  |      | 0   | n/a  | n/a  | 0 |
|     | 0.09 | n/a     |     | 1.41 | 0.66 | 0   | 1.48 | 0.19 | 0 |
|     | 0.09 | 1 b1034 |     | 0.78 | 0.2  | 1   | 0.99 | 0.18 | 1 |
|     | 0.07 | 1 b1765 |     | 0.94 | 0.08 | 0   | 0.82 | 0.32 | 1 |
|     | 0.07 | 1 b1640 |     | 0.85 | 0.32 | 0   | 1.55 | 1.55 | 0 |
|     | 0.08 | 1 b1610 |     | 1.44 | 0.88 | 1   | 1.09 | 0.21 | 1 |
|     | 0.11 | 1 b1607 |     | 1.41 | 0.21 | 0   | 1.42 | 0.49 | 0 |
|     | 0.06 | 1 b1053 |     | 1.08 | 0.47 | 0   | 1.39 | 0.46 | 0 |
|     | 0.1  | 1       |     | 5.7  | 1.46 | 1   | 1.5  | 0.65 | 0 |
|     | 0.06 | 1 b1633 |     | 0.79 | 0.14 | 1   | 0.88 | 0.2  | 1 |
|     | 0.06 | 1 b1959 |     | 1.23 | 0.21 | 0   | 1.24 | 0.29 | 1 |
|     | 0.07 | 1 b2022 |     | 1.26 | 0.22 | 0   | 0.96 | 0.25 | 1 |
|     | 0.09 | 1 b1763 |     | 0.99 | 0.32 | 1   | 0.91 | 0.12 | 1 |
|     | 0.1  | 1 b1642 |     | 1.04 | 0.2  | 1   | 1.06 | 0.27 | 1 |
|     | 0.16 | 0 b1654 |     | 0.74 | 0.09 | 1   | 0.72 | 0.13 | 1 |
|     | 0.08 | 1 b1614 |     | 0.55 | 0.12 | 1   | 0.44 | 0.12 | 1 |
|     | 0.06 | 1       |     | 1.76 | 0.6  | 0   | 1.55 | 0.38 | 0 |
|     | 0.1  | 1 b3742 |     | 0.61 | 0.5  | 0   | 0.82 | 0.31 | 1 |
|     | 0.11 | 1       |     | 1.74 | 0.82 | 1   | 1.33 | 0.22 | 1 |
|     | 0.1  | 1 b2564 |     | 0.75 | 0.13 | 1   | 1.45 | 0.41 | 0 |
|     | 0.1  | 1 b0400 |     | 0.98 | 1.72 | 0   | 1.39 | 0.23 | 0 |
|     | 0.1  | 1 b4014 |     | 0.14 | 0.06 | 1   | 0.08 | 0.03 | 1 |
|     | 0.08 | 1       |     | 1.39 | 0.5  | 0   | 1.79 | 0.64 | 0 |
|     | 0.06 | 1 b1727 |     | 0.91 | 0.2  | 0   | 1.19 | 0.3  | 1 |
|     | 0.09 | 1       |     | 1.15 | 0.34 | 0   | 1.08 | 0.84 | 0 |
|     | 0.07 | 1 b1950 |     | 1.08 | 0.39 | 0   | 2.31 | 0.51 | 0 |
|     | 0.06 | 1 b1624 |     | 0.56 | 0.14 | 1   | 0.53 | 0.15 | 1 |

|     |      |         |      |      |   |      |      |   |
|-----|------|---------|------|------|---|------|------|---|
|     | 0.06 | 1 b1593 | 1.5  | 0.91 | 0 | 1.5  | 0.26 | 0 |
|     | 0.09 | 1       | 0.65 | 0.16 | 1 | 1    | 0.23 | 1 |
|     | 0.08 | 1       | 0.99 | 0.33 | 0 | 1.25 | 5.12 | 0 |
| n/a | n/a  |         | n/a  | n/a  | 0 | n/a  | n/a  | 0 |
|     | 0.18 | 0 b3029 | 1.28 | 0.24 | 1 | 0.93 | 0.31 | 1 |
|     | 0.1  | 1 b3463 | 1.12 | 0.18 | 0 | 0.93 | 0.26 | 1 |
|     | 0.13 | 1 b3385 | 0.66 | 0.41 | 1 | 0.89 | 0.1  | 1 |
|     | 0.08 | 1       | 1.47 | 0.61 | 0 | 1.4  | 0.59 | 0 |
|     | 0.06 | 1       | 1.54 | 2.53 | 0 | 1.4  | 0.71 | 0 |
|     | 0.06 | 1 b0453 | 1.11 | 0.5  | 1 | 0.89 | 0.41 | 1 |
|     | 0.07 | 0       | 1.42 | 0.59 | 0 | 1.36 | 0.71 | 0 |
|     | 0.11 | 1 b4226 | 0.28 | 0.19 | 1 | 0.2  | 0.07 | 1 |
|     | 0.06 | 1 b4354 | 0.33 | 0.04 | 1 | 0.2  | 0.06 | 1 |
|     | 0.11 | 1 b3039 | 0.94 | 0.22 | 0 | 1.74 | 2.23 | 0 |
|     | 0.09 | 1 b3081 | 1.02 | 0.22 | 0 | 1.46 | 0.83 | 0 |
|     | 0.12 | 1 b3085 | 1.27 | 0.39 | 0 | 1.34 | 0.27 | 0 |
|     | 0.13 | 1       | 1.08 | 0.38 | 0 | 1.74 | 0.57 | 0 |
|     | 0.07 | 1 b2297 | 0.65 | 0.11 | 1 | 0.48 | 0.25 | 1 |
|     | 0.07 | 1       | 1.02 | 0.23 | 0 | 0.82 | 0.34 | 1 |
|     | 0.08 | 1 b0518 | 1.75 | 0.51 | 0 | 1.4  | 0.39 | 0 |
|     | 0.1  | 1 b0517 | 1.43 | 0.57 | 0 | 1.88 | 0.5  | 0 |
|     | 0.1  | 1       | 0.75 | 0.22 | 1 | 0.92 | 0.21 | 1 |
|     | 8.16 | 1       | 1.59 | 0.21 | 1 | 0.97 | 0.2  | 1 |
|     | 0.05 | 1 b0653 | 0.6  | 0.07 | 1 | 0.84 | 0.2  | 1 |
|     | 0.19 | 1       | 3.09 | 0.74 | 1 | 0.8  | 0.37 | 1 |
|     | 0.15 | 1 b2568 | 0.64 | 0.13 | 1 | 0.52 | 0.13 | 1 |
|     | 0.05 | 1 b2026 | 0.89 | 0.17 | 0 | 0.86 | 0.36 | 1 |
|     | 0.08 | 1 b3871 | 0.24 | 0.24 | 1 | 0.21 | 0.04 | 1 |
|     | 0.06 | 1 b0856 | 1.16 | 0.57 | 1 | 0.97 | 0.15 | 1 |
|     | 0.12 | 1 b3291 | 1.23 | 0.81 | 0 | 1.08 | 0.25 | 1 |
| n/a | n/a  |         | n/a  | n/a  | 0 | n/a  | n/a  | 0 |
|     | 0.03 | 1 b1083 | 1.04 | 0.08 | 0 | 1    | 0.18 | 1 |
|     | 0.1  | 1 b2566 | 0.36 | 0.12 | 1 | 0.43 | 0.14 | 1 |
|     | 0.11 | 1       | 0.19 | 0.01 | 1 | 0.27 | 0.16 | 1 |
|     | 0.06 | 1 b2551 | 0.3  | 0.04 | 1 | 0.13 | 0.15 | 1 |
|     | 0.1  | 1 b1014 | 1    | 0.2  | 1 | 0.19 | 0.46 | 1 |
|     | 0.08 | 1 b1613 | 0.63 | 0.33 | 1 | 0.53 | 0.39 | 1 |
|     | 0.04 | 1 b0844 | 1.41 | 0.26 | 0 | 1.54 | 0.51 | 0 |
|     | 0.06 | 1 b0818 | 0.9  | 0.1  | 0 | 1.06 | 0.17 | 0 |
|     | 0.16 | 0       | 1.36 | 0.65 | 0 | 1.76 | 0.68 | 0 |
|     | 0.14 | 0       | 1.46 | 0.41 | 0 | 1.95 | 0.58 | 0 |
|     | 0.04 | 1       | 1.7  | 3.37 | 0 | 1.56 | 0.6  | 0 |
|     | 0.12 | 1       | 1.34 | 0.3  | 1 | 1.17 | 0.2  | 1 |
|     | 0.08 | 1 b1908 | 1.81 | 0.77 | 1 | 1.29 | 0.43 | 1 |
|     | 0.06 | 1 b1329 | 0.89 | 0.11 | 1 | 0.4  | 0.07 | 1 |
|     | 0.06 | 1 b1306 | 1.43 | 0.51 | 0 | 1.81 | 0.43 | 0 |
|     | 0.12 | 1       | 1.16 | 0.5  | 0 | 1.4  | 0.55 | 0 |
|     | 0.18 | 1 b0028 | 1.26 | 0.16 | 1 | 0.87 | 0.34 | 1 |
|     | 0.05 | 1       | 1.21 | 0.39 | 0 | 1.16 | 0.15 | 1 |
|     | 0.26 | 0       | 1.69 | 1.6  | 0 | 1.82 | 0.54 | 0 |
|     | 0.09 | 1 b3878 | 1.8  | 0.41 | 0 | 1.66 | 0.61 | 0 |
|     | 0.1  | 1 b3460 | 1.5  | 0.48 | 0 | 1.7  | 0.4  | 0 |

|      |     |       |      |      |   |      |      |   |
|------|-----|-------|------|------|---|------|------|---|
| 0.15 | n/a |       | 1.51 | 0.85 | 0 | 1.86 | 1.15 | 0 |
| 0.03 | n/a |       | 1.1  | 0.34 | 1 | 1.32 | 0.58 | 1 |
| 0.11 | 1   |       | 1.06 | 0.26 | 0 | 1.46 | 0.49 | 0 |
| 0.09 | 1   | b1868 | 0.56 | 0.4  | 1 | 0.71 | 0.21 | 1 |
| 0.08 | 1   |       | 1.59 | 0.47 | 0 | 1.85 | 0.49 | 0 |
| 0.06 | 1   | b2844 | 0.34 | 0.06 | 1 | 0.45 | 0.92 | 1 |
| 0.17 | 0   | b3065 | 0.25 | 0.08 | 1 | 0.25 | 0.16 | 1 |
| 0.11 | 1   |       | 1.23 | 0.3  | 0 | 1.31 | 0.09 | 0 |
| 0.07 | 1   | b3831 | 2.71 | 0.43 | 1 | 1.58 | 0.7  | 1 |
| 0.12 | 1   |       | 0.52 | 0.06 | 1 | 0.42 | 0.09 | 1 |
| 0.07 | 1   | b2914 | 0.52 | 0.57 | 1 | 0.21 | 0.03 | 1 |
| 0.11 | 1   | b3794 | 1.07 | 0.27 | 0 | 1.54 | 0.39 | 0 |
| 0.16 | 1   | b2951 | 0.78 | 0.24 | 1 | 0.84 | 0.17 | 1 |
| 0.3  | 1   | b3986 | 0.47 | 0.16 | 1 | 0.17 | 0.03 | 1 |
| 0.03 | 1   |       | 1.34 | 0.4  | 1 | 0.64 | 0.24 | 1 |
| 0.04 | 1   |       | 1.26 | 0.34 | 0 | 1.18 | 3.28 | 1 |
| 0.14 | 1   | b3867 | 0.35 | 0.07 | 1 | 0.41 | 0.14 | 1 |
| 0.12 | 1   | b2839 | 1.29 | 0.71 | 0 | 1.23 | 0.65 | 0 |
| 0.03 | 1   |       | 1.68 | 0.52 | 0 | 1.71 | 0.49 | 0 |
| 0.06 | 1   |       | 0.75 | 0.12 | 1 | 0.55 | 0.32 | 1 |
| 0.06 | n/a | b3765 | 1.42 | 0.46 | 0 | 1.32 | 0.6  | 1 |
| 0.08 | n/a |       | 1.77 | 0.35 | 1 | 0.99 | 0.47 | 1 |
| 0.1  | 1   |       | 1.29 | 0.45 | 0 | 1.53 | 1.11 | 0 |
| 0.04 | 1   | b1478 | 0.99 | 0.14 | 1 | 0.61 | 0.34 | 1 |
| 0.07 | 1   | b1428 | 1.34 | 0.24 | 1 | 0.96 | 0.38 | 1 |
| 0.09 | 1   | b1381 | 1.38 | 0.36 | 0 | 1.01 | 0.22 | 0 |
| 0.07 | 1   |       | 1.16 | 0.25 | 0 | 1.48 | 0.53 | 0 |
| 0.07 | 1   |       | 1.2  | 0.4  | 0 | 1.14 | 0.32 | 0 |
| 0.03 | 1   | b1540 | 0.99 | 0.2  | 1 | 0.91 | 0.22 | 1 |
| 0.05 | 1   | b0930 | 0.3  | 0.14 | 1 | 0.21 | 0.03 | 1 |
| 0.06 | 1   | b0588 | 3.2  | 0.6  | 1 | 2    | 0.84 | 1 |
| 0.11 | 1   |       | 1.57 | 0.97 | 0 | 1.82 | 0.38 | 0 |
| 0.08 | 1   |       | 0.93 | 0.18 | 0 | 1.59 | 1.24 | 1 |
| 0.05 | 1   | b1449 | 1.08 | 0.24 | 1 | 0.82 | 0.23 | 1 |
| 0.06 | 1   | b1822 | 0.98 | 0.26 | 1 | 0.95 | 1.07 | 1 |
| n/a  | n/a |       | n/a  | n/a  | 0 | n/a  | n/a  | 0 |
| 0.04 | 1   |       | 0.81 | 0.12 | 1 | 1.13 | 0.31 | 1 |
| 0.1  | 1   | b1902 | 1.2  | 0.35 | 0 | 1.81 | 0.28 | 0 |
| 0.06 | 1   | b0505 | 1.14 | 0.24 | 0 | 1.33 | 0.31 | 0 |
| 0.1  | 1   |       | 0.36 | 0.18 | 1 | 0.44 | 0.12 | 1 |
| n/a  | n/a |       | n/a  | n/a  | 0 | n/a  | n/a  | 0 |
| 0.07 | 1   | b0394 | 0.95 | 0.27 | 0 | 1.39 | 0.25 | 0 |
| 0.12 | 1   | b2997 | 1.24 | 0.24 | 1 | 1.21 | 0.25 | 1 |
| 0.08 | 1   | b2701 | 2    | 0.51 | 0 | 1.45 | 0.53 | 0 |
| 0.03 | 1   |       | 1.11 | 0.49 | 0 | 1.42 | 0.3  | 0 |
| 0.06 | 1   |       | 1.12 | 0.22 | 1 | 0.7  | 0.1  | 1 |
| 0.1  | 1   |       | 1.63 | 0.86 | 0 | 1.75 | 0.43 | 0 |
| 0.09 | 1   | b3660 | 1.46 | 0.61 | 0 | 1.49 | 0.21 | 0 |
| 0.12 | 1   | b2818 | 1.34 | 0.24 | 0 | 1.47 | 0.5  | 0 |
| 0.12 | 1   |       | 1.67 | 0.41 | 0 | 1.6  | 0.13 | 0 |
| 0.14 | 1   | b2956 | 0.96 | 0.15 | 1 | 0.95 | 0.24 | 1 |
| 0.06 | 1   | b0452 | 0.86 | 0.24 | 1 | 0.95 | 0.64 | 0 |

|      |         |  |      |      |   |      |      |   |
|------|---------|--|------|------|---|------|------|---|
| 0.08 | 1       |  | 1.39 | 0.24 | 0 | 1.27 | 0.72 | 0 |
| 0.11 | 1 b3634 |  | 0.75 | 0.56 | 0 | 1.72 | 0.08 | 0 |
| 0.12 | 1 b2798 |  | 0.82 | 0.12 | 1 | 0.82 | 0.33 | 1 |
| 0.07 | 1 b2843 |  | 1.19 | 0.32 | 0 | 1.24 | 0.53 | 1 |
| n/a  | n/a     |  | n/a  | n/a  | 0 | n/a  | n/a  | 0 |
| 0.04 | 1       |  | 1.09 | 0.28 | 0 | 1.4  | 0.12 | 0 |
| 0.09 | 1 b2699 |  | 6.3  | 0.96 | 1 | 3.97 | 2.23 | 1 |
| 0.12 | 1 b2061 |  | 1.45 | 0.32 | 0 | 1.79 | 0.58 | 0 |
| 0.07 | n/a     |  | 1.59 | 0.29 | 0 | 1.48 | 0.65 | 0 |
| 0.02 | 1 b3621 |  | 0.76 | 0.14 | 1 | 0.7  | 0.17 | 1 |
| 0.22 | 0 b3316 |  | 0.38 | 0.08 | 1 | 0.26 | 0.09 | 1 |
| 0.06 | 1 b3211 |  | 1.19 | 0.32 | 0 | 1.17 | 0.51 | 0 |
| 0.11 | 1       |  | 1.04 | 0.38 | 0 | 1.03 | 0.22 | 1 |
| 0.11 | 1 b3496 |  | 1.36 | 0.8  | 1 | 1.1  | 0.16 | 1 |
| 0.05 | 1       |  | 1.2  | 0.32 | 0 | 1.54 | 0.31 | 0 |
| 0.12 | 1       |  | 1.28 | 0.49 | 0 | 1.72 | 0.43 | 0 |
| 0.1  | 1       |  | 1.34 | 0.16 | 1 | 1.37 | 0.26 | 1 |
| n/a  | n/a     |  | n/a  | n/a  | 0 | n/a  | n/a  | 0 |
| 0.12 | 0       |  | 1.49 | 0.51 | 0 | 2.14 | 0.6  | 0 |
| 0.1  | 1 b4141 |  | 1.23 | 0.46 | 1 | 1.22 | 0.68 | 1 |
| 0.08 | 1 b2689 |  | 0.98 | 0.11 | 1 | 0.97 | 0.43 | 1 |
| 0.12 | 1       |  | 0.94 | 0.29 | 1 | 1.24 | 0.39 | 0 |
| n/a  | n/a     |  | n/a  | n/a  | 0 | n/a  | n/a  | 0 |
| 0.09 | 1       |  | 1.6  | 0.24 | 0 | 1.63 | 0.34 | 0 |
| 0.05 | 1       |  | 1.48 | 0.46 | 0 | 1.48 | 0.36 | 0 |
| 0.09 | 1       |  | 0.89 | 0.34 | 0 | 1.19 | 0.46 | 1 |
| 0.1  | 1 b0956 |  | 1.17 | 0.14 | 1 | 0.67 | 0.25 | 1 |
| n/a  | n/a     |  | n/a  | n/a  | 0 | n/a  | n/a  | 0 |
| 0.05 | 1 b0815 |  | 1.1  | 0.16 | 0 | 1.28 | 0.58 | 1 |
| 0.09 | 1 b1749 |  | 2.85 | 0.57 | 1 | 1.56 | 0.47 | 1 |
| 0.03 | 1 b3128 |  | 3.8  | 2.56 | 1 | 1.15 | 0.3  | 1 |
| 0.09 | 1 b0792 |  | 2.55 | 3.37 | 1 | 1.64 | 0.21 | 0 |
| 0.14 | 1 b2906 |  | 0.79 | 0.16 | 1 | 0.91 | 0.27 | 1 |
| 0.08 | 1       |  | 1.52 | 0.4  | 1 | 1.1  | 0.19 | 1 |
| 0.08 | 1 b3088 |  | 0.89 | 0.13 | 0 | 1.1  | 0.26 | 1 |
| 0.09 | 1       |  | 1.19 | 0.3  | 0 | 1.27 | 0.44 | 0 |
| 0.02 | 1       |  | 1.21 | 0.36 | 0 | 1.41 | 1.47 | 0 |
| 0.07 | 1       |  | 0.79 | 0.08 | 1 | 0.63 | 0.75 | 1 |
| 0.12 | 1       |  | 1.48 | 0.29 | 0 | 1.84 | 0.42 | 0 |
| 0.1  | 1       |  | 0.88 | 0.19 | 1 | 0.92 | 0.2  | 1 |
| 0.14 | 0       |  | 1.45 | 0.64 | 0 | 1.78 | 0.94 | 0 |
| 0.02 | 1       |  | 1.32 | 0.17 | 0 | 1.33 | 0.51 | 0 |
| 0.02 | 1 b0760 |  | 1.06 | 0.14 | 1 | 1.35 | 0.32 | 1 |
| 0.09 | 1       |  | 0.8  | 0.19 | 1 | 1    | 0.1  | 1 |
| 0.1  | 1 b2526 |  | 0.48 | 0.1  | 1 | 0.68 | 0.19 | 1 |
| 0.08 | 1 b2471 |  | 0.57 | 0.28 | 1 | 0.79 | 0.31 | 1 |
| 0.06 | 1 b0466 |  | 1.24 | 0.21 | 0 | 1.49 | 0.28 | 0 |
| 0.08 | 1 b1195 |  | 1.14 | 0.47 | 0 | 1.56 | 0.8  | 0 |
| 0.12 | 1 b4023 |  | 0.79 | 0.11 | 0 | 1.39 | 0.39 | 1 |
| 0.25 | 1 b4353 |  | 0.64 | 0.59 | 1 | 0.48 | 0.21 | 1 |
| 0.05 | 1 b3425 |  | 1.4  | 0.45 | 1 | 0.97 | 0.3  | 1 |
| 0.1  | 1 b3459 |  | 0.93 | 0.27 | 0 | 1.37 | 0.35 | 0 |

|     |      |     |       |      |      |   |      |      |   |
|-----|------|-----|-------|------|------|---|------|------|---|
|     | 0.16 | 1   |       | 1.19 | 0.4  | 0 | 1.68 | 0.62 | 0 |
| n/a | n/a  |     | n/a   | n/a  |      | 0 | n/a  | n/a  | 0 |
|     | 0.06 | 1   |       | 1.14 | 0.44 | 0 | 1.83 | 0.57 | 0 |
|     | 0.21 | 0   | b3561 | 1.77 | 0.42 | 0 | 1.58 | 0.51 | 0 |
| n/a | n/a  |     | n/a   | n/a  |      | 0 | n/a  | n/a  | 0 |
|     | 0.08 | 1   | b0239 | 1.32 | 0.28 | 1 | 0.95 | 1.01 | 1 |
|     | 0.07 | 1   | b0004 | 1.53 | 0.32 | 1 | 1.31 | 0.65 | 1 |
|     | 0.07 | 1   |       | 1.44 | 0.28 | 1 | 1.47 | 0.43 | 1 |
|     | 0.03 | n/a | b1648 | 1.23 | 0.15 | 0 | 1.78 | 0.3  | 0 |
|     | 0.1  | 1   |       | 1.59 | 0.21 | 0 | 1.7  | 0.18 | 0 |
|     | 0.08 | 1   |       | 0.72 | 0.09 | 1 | 0.96 | 0.16 | 1 |
|     | 0.06 | n/a |       | 1.37 | 0.6  | 0 | 1.72 | 0.57 | 0 |
|     | 0.01 | 1   |       | 1.29 | 0.35 | 0 | 1.3  | 0.36 | 0 |
|     | 0.15 | 0   | b1058 | 0.97 | 0.36 | 0 | 1.63 | 0.75 | 0 |
| n/a | n/a  |     | n/a   | n/a  |      | 0 | n/a  | n/a  | 0 |
|     | 0.13 | 1   | b3156 | 0.92 | 0.24 | 1 | 1.16 | 0.39 | 1 |
|     | 0.1  | 1   | b3101 | 0.89 | 0.18 | 0 | 1.54 | 2.98 | 1 |
| n/a | n/a  |     | n/a   | n/a  |      | 0 | n/a  | n/a  | 0 |
|     | 0.1  | 1   | b0917 | 0.95 | 0.26 | 1 | 1.26 | 0.29 | 1 |
| n/a | n/a  |     | n/a   | n/a  |      | 0 | n/a  | n/a  | 0 |
|     | 0.05 | 1   | b0751 | 0.96 | 0.2  | 0 | 1.28 | 0.26 | 0 |
| n/a | n/a  |     | n/a   | n/a  |      | 0 | n/a  | n/a  | 0 |
| n/a | n/a  |     | n/a   | n/a  |      | 0 | n/a  | n/a  | 0 |
| n/a | n/a  |     | n/a   | n/a  |      | 0 | n/a  | n/a  | 0 |
| n/a | n/a  |     | n/a   | n/a  |      | 0 | n/a  | n/a  | 0 |
| n/a | n/a  |     | n/a   | n/a  |      | 0 | n/a  | n/a  | 0 |
| n/a | n/a  |     | n/a   | n/a  |      | 0 | n/a  | n/a  | 0 |
|     | 0.05 | 1   |       | 2.12 | 0.26 | 1 | 1.54 | 0.3  | 0 |
|     | 0.05 | n/a |       | 0.86 | 0.27 | 0 | 1.33 | 0.38 | 0 |
|     | 0.08 | n/a | b0061 | 1.38 | 0.54 | 0 | 1.95 | 0.29 | 0 |
|     | 0.05 | n/a | b0186 | 1.22 | 0.18 | 1 | 1.11 | 0.25 | 1 |
|     | 0.04 | 1   |       | 1.24 | 0.41 | 0 | 1.26 | 0.26 | 1 |
|     | 0.06 | n/a | b0903 | 1.47 | 0.34 | 1 | 0.4  | 0.14 | 1 |
|     | 0.09 | n/a |       | 0.96 | 0.42 | 1 | 0.96 | 0.16 | 1 |
| n/a | n/a  |     | n/a   | n/a  |      | 0 | n/a  | n/a  | 0 |
| n/a | n/a  |     | n/a   | n/a  |      | 0 | n/a  | n/a  | 0 |
|     | 0.1  | n/a | b3266 | 1.06 | 0.17 | 1 | 1.17 | 0.29 | 1 |
| n/a | n/a  |     | n/a   | n/a  |      | 0 | n/a  | n/a  | 0 |
|     | 0.05 | 1   |       | 1.53 | 0.75 | 0 | 1.65 | 0.4  | 0 |
|     | 0.08 | 1   | b3789 | 1.1  | 0.18 | 1 | 0.74 | 0.48 | 1 |
|     | 0.12 | 1   |       | 0.83 | 0.14 | 1 | 1.06 | 0.4  | 1 |
|     | 0.06 | n/a |       | 1.61 | 0.27 | 1 | 2.04 | 1.5  | 1 |
|     | 0.06 | 1   |       | 1.37 | 0.34 | 0 | 1.43 | 0.31 | 0 |
|     | 0.06 | 1   | b1536 | 1.32 | 0.3  | 0 | 1.93 | 0.61 | 0 |
|     | 0.12 | 0   |       | 1.4  | 1.11 | 0 | 2.06 | 0.87 | 0 |
|     | 0.1  | 1   |       | 1.27 | 0.24 | 0 | 1.23 | 0.43 | 1 |
|     | 0.05 | n/a |       | 1.6  | 0.24 | 1 | 1    | 0.33 | 1 |
|     | 0.09 | 1   |       | 0.74 | 0.16 | 1 | 1.41 | 0.42 | 1 |
|     | 0.07 | 1   |       | 1.42 | 0.51 | 0 | 1.51 | 0.72 | 0 |
|     | 0.07 | 1   |       | 1.45 | 0.59 | 0 | 1.64 | 0.64 | 0 |
|     | 0.06 | 1   |       | 1    | 1.73 | 0 | 2.25 | 0.62 | 0 |

|      |     |       |      |      |   |      |      |   |
|------|-----|-------|------|------|---|------|------|---|
| 0.07 | 1   |       | 0.94 | 0.24 | 0 | 1.45 | 0.56 | 1 |
| 0.07 | n/a |       | 1.62 | 0.33 | 1 | 1.23 | 0.34 | 1 |
| 0.08 | 1   |       | 1.14 | 0.24 | 0 | 1.1  | 0.23 | 1 |
| 0.06 | 1   |       | 1.22 | 0.2  | 0 | 1.34 | 0.53 | 1 |
| 0.1  | 1   |       | 1.3  | 0.27 | 0 | 1.64 | 0.42 | 1 |
| 0.08 | 1   |       | 1.06 | 0.3  | 0 | 1.92 | 0.57 | 0 |
| 0.03 | 1   |       | 0.97 | 0.16 | 0 | 1.49 | 0.29 | 0 |
| 0.08 | 1   |       | 1.03 | 0.31 | 1 | 1.67 | 1.1  | 0 |
| 0.11 | 1   |       | 1.2  | 0.68 | 0 | 2.13 | 0.84 | 0 |
| 0.06 | 1   |       | 1.23 | 0.2  | 0 | 1.8  | 0.37 | 0 |
| 0.04 | 1   |       | 0.94 | 0.21 | 0 | 1.63 | 0.5  | 1 |
| 0.08 | 1   |       | 0.99 | 0.08 | 1 | 0.8  | 0.34 | 1 |
| 0.07 | 1   |       | 0.9  | 0.21 | 0 | 1.32 | 0.38 | 0 |
| 0.06 | 1   |       | 1.54 | 0.28 | 0 | 1.04 | 0.3  | 1 |
| 0.08 | 1   |       | 1.71 | 0.44 | 1 | 1.49 | 1.1  | 1 |
| 0.07 | 1   |       | 1.58 | 0.22 | 0 | 1.75 | 0.45 | 0 |
| 0.1  | 1   |       | 1.43 | 0.24 | 0 | 1.08 | 0.31 | 1 |
| n/a  | n/a |       | n/a  | n/a  | 0 | n/a  | n/a  | 0 |
| n/a  | n/a |       | n/a  | n/a  | 0 | n/a  | n/a  | 0 |
| n/a  | n/a |       | n/a  | n/a  | 0 | n/a  | n/a  | 0 |
| n/a  | n/a |       | n/a  | n/a  | 0 | n/a  | n/a  | 0 |
| n/a  | n/a |       | n/a  | n/a  | 0 | n/a  | n/a  | 0 |
| n/a  | n/a |       | n/a  | n/a  | 0 | n/a  | n/a  | 0 |
| 0.12 | 1   |       | 1.12 | 0.26 | 0 | 0.92 | 0.59 | 1 |
| 0.06 | 1   | b0474 | 0.21 | 0.01 | 1 | 0.35 | 0.03 | 1 |
| 0.08 | 1   |       | 1.16 | 0.27 | 0 | 1.38 | 0.28 | 0 |
| 0.16 | 1   | b3667 | 1.22 | 0.33 | 0 | 1.4  | 0.28 | 0 |
| 0.05 | 1   |       | 1.41 | 0.32 | 0 | 1.42 | 0.4  | 0 |
| 0.12 | 1   | b0051 | 0.5  | 0.23 | 1 | 0.47 | 0.14 | 1 |
| 0.06 | 1   |       | 0.79 | 0.16 | 1 | 0.6  | 0.13 | 1 |
| 0.16 | 0   | b3188 | 1.16 | 0.2  | 0 | 1.59 | 0.52 | 0 |
| 0.17 | 1   | b3230 | 0.45 | 0.13 | 1 | 0.69 | 0.22 | 1 |
| 0.1  | 1   |       | 0.23 | 0.04 | 1 | 0.27 | 0.1  | 1 |
| 0.1  | 1   | b0634 | 0.98 | 0.08 | 1 | 0.96 | 0.19 | 1 |
| 0.08 | 1   | b0652 | 0.49 | 0.24 | 0 | 1.3  | 0.48 | 0 |
| 0.05 | 1   | b0124 | 1.04 | 0.12 | 0 | 1.39 | 0.39 | 0 |
| 0.18 | 1   | b0147 | 1.16 | 0.24 | 0 | 1.14 | 0.23 | 0 |
| 0.09 | 1   | b0177 | 0.51 | 0.12 | 1 | 0.29 | 0.05 | 1 |
| 0.05 | 1   | b1542 | 1.27 | 0.25 | 0 | 1.53 | 0.6  | 0 |
| 0.04 | 1   |       | 1.35 | 0.12 | 1 | 1.02 | 0.25 | 1 |
| n/a  | n/a |       | n/a  | n/a  | 0 | n/a  | n/a  | 0 |
| 0.1  | 1   | b3462 | 1.38 | 0.14 | 1 | 1.35 | 0.69 | 0 |
| 0.06 | 1   | b4374 | 0.5  | 0.17 | 1 | 0.92 | 0.36 | 1 |
| 0.07 | 1   |       | 1.09 | 0.16 | 0 | 1.69 | 0.37 | 0 |
| 0.07 | 1   | b0221 | 0.56 | 0.1  | 1 | 0.84 | 0.2  | 1 |
| n/a  | n/a |       | n/a  | n/a  | 0 | n/a  | n/a  | 0 |
| 0.1  | 1   | b0955 | 0.47 | 0.2  | 1 | 0.65 | 0.14 | 1 |
| 0.14 | n/a |       | 1.34 | 0.29 | 0 | 1.5  | 0.94 | 0 |
| n/a  | n/a |       | n/a  | n/a  | 0 | n/a  | n/a  | 0 |
| n/a  | n/a |       | n/a  | n/a  | 0 | n/a  | n/a  | 0 |
| 0.06 | 1   | b0960 | 0.88 | 0.22 | 0 | 1.07 | 0.54 | 1 |
| 0.05 | 1   | b1004 | 1.73 | 0.27 | 1 | 1.96 | 0.36 | 0 |



|     |          |         |      |      |       |      |      |   |
|-----|----------|---------|------|------|-------|------|------|---|
|     | 0.12     | 1 b1055 | 0.56 | 0.2  | 0     | 0.76 | 0.12 | 1 |
|     | 0.17     | 1 b3857 | 1.04 | 0.15 | 0     | 1.03 | 0.25 | 1 |
|     | 0.07     | 0       | 1.4  | 0.13 | 0     | 1.79 | 0.49 | 0 |
|     | 0.06     | 1 b1036 | 1.05 | 0.44 | 0     | 1.91 | 0.31 | 0 |
|     | 0.14     | 0 b1094 | 0.42 | 0.04 | 1     | 0.18 | 0.08 | 1 |
|     | 0.08     | 1 b1114 | 0.77 | 0.18 | 1     | 0.9  | 0.25 | 1 |
|     | 0.09     | 1 b3432 | 1.46 | 0.22 | 1     | 0.69 | 0.36 | 1 |
|     | 0.04     | 1 b1048 | 0.56 | 0.05 | 1     | 0.41 | 0.09 | 1 |
|     | 0.05     | 1 b3398 | 0.63 | 0.3  | 1     | 1.05 | 0.27 | 1 |
| n/a | n/a      |         | n/a  | n/a  | 0 n/a | n/a  |      | 0 |
|     | 0.09     | 1 b1786 | 1.1  | 0.24 | 0     | 1.68 | 0.33 | 0 |
|     | 0.09     | 1       | 1.54 | 0.27 | 0     | 1.46 | 0.37 | 0 |
|     | 0.16     | 1 b3927 | 1.63 | 0.26 | 1     | 0.97 | 0.21 | 1 |
| n/a | n/a      |         | n/a  | n/a  | 0 n/a | n/a  |      | 0 |
| n/a | n/a      |         | n/a  | n/a  | 0 n/a | n/a  |      | 0 |
|     | 0.13     | 1 b4064 | 0.67 | 0.23 | 1     | 1.37 | 0.31 | 1 |
|     | 0.08     | 1       | 1.51 | 0.17 | 0     | 1.64 | 2.01 | 0 |
| n/a | n/a      |         | n/a  | n/a  | 0 n/a | n/a  |      | 0 |
|     | 0.08     | 1 b0862 | 0.47 | 0.14 | 1     | 0.84 | 0.28 | 1 |
|     | 0.08     | 1 b2400 | 0.31 | 0.05 | 1     | 0.52 | 0.15 | 1 |
| n/a | n/a      |         | n/a  | n/a  | 0 n/a | n/a  |      | 0 |
|     | 0.05     | 1 b0876 | 0.91 | 0.34 | 0     | 0.93 | 0.23 | 1 |
|     | 0.07     | 1       | 1.49 | 0.37 | 0     | 1.62 | 0.62 | 0 |
| n/a | n/a      |         | n/a  | n/a  | 0 n/a | n/a  |      | 0 |
| n/a | n/a      |         | n/a  | n/a  | 0 n/a | n/a  |      | 0 |
|     | 0.06     | 1 b4111 | 1.08 | 0.26 | 0     | 1.25 | 0.52 | 1 |
|     | 0.14     | 1       | 0.19 | 0.18 | 1     | 0.29 | 0.09 | 1 |
|     | 0.06     | 1 b2328 | 0.61 | 0.17 | 1     | 1.26 | 0.62 | 0 |
|     | 0.11     | 1 b2408 | 1.84 | 0.59 | 0     | 1.35 | 1.44 | 0 |
|     | 0.06     | 1 b2466 | 0.81 | 0.27 | 0     | 1.26 | 0.47 | 0 |
|     | 0.12 n/a | b2504   | 1.22 | 0.31 | 0     | 1.9  | 0.75 | 0 |
|     | 0.08     | 1       | 0.97 | 0.24 | 0     | 1.29 | 0.25 | 1 |
|     | 0.13     | 1       | 1.62 | 0.3  | 0     | 2.02 | 0.75 | 0 |
|     | 0.07     | 1 b4201 | 0.32 | 0.08 | 1     | 0.21 | 0.04 | 1 |
|     | 0.06     | 1 b2206 | 1.91 | 1.24 | 0     | 2.2  | 0.73 | 0 |
|     | 0.06 n/a | b4265   | 1.49 | 0.23 | 0     | 1.64 | 0.56 | 0 |
|     | 0.1      | 1 b2294 | 0.94 | 0.21 | 1     | 0.75 | 0.09 | 1 |
|     | 0.27     | 1 b2286 | 0.3  | 0.06 | 1     | 0.21 | 0.04 | 1 |
| n/a | n/a      |         | n/a  | n/a  | 0 n/a | n/a  |      | 0 |
|     | 0.05     | 1 b1920 | 1.22 | 0.2  | 1     | 1.12 | 0.26 | 1 |
|     | 0.17     | 1 b3336 | 1.73 | 0.36 | 0     | 1.45 | 0.36 | 0 |
|     | 0.09     | 1 b0961 | 1.02 | 0.18 | 0     | 1.7  | 0.95 | 0 |
|     | 0.08     | 1 b1123 | 0.34 | 0.04 | 1     | 0.34 | 0.14 | 1 |
|     | 0.08     | 1 b2460 | 1.22 | 0.8  | 0     | 1.68 | 0.48 | 0 |
|     | 0.03     | 1 b1125 | 0.87 | 0.06 | 0     | 1.22 | 8.22 | 0 |
|     | 0.08     | 1       | 0.89 | 0.29 | 0     | 1.09 | 0.46 | 1 |
|     | 0.1      | 1 b4182 | 1.3  | 0.13 | 0     | 1.69 | 0.48 | 0 |
|     | 0.09     | 1 b4216 | 1.15 | 0.17 | 0     | 0.94 | 0.32 | 1 |
| n/a | n/a      |         | n/a  | n/a  | 0 n/a | n/a  |      | 0 |
|     | 0.17     | 1       | 1.4  | 0.55 | 0     | 2.45 | 1.15 | 0 |
|     | 0.06     | 1       | 1.33 | 0.29 | 0     | 1.94 | 0.65 | 0 |
|     | 0.15     | 1 b1237 | 0.36 | 0.09 | 1     | 0.25 | 0.1  | 1 |

|     |          |         |     |      |      |       |      |      |   |
|-----|----------|---------|-----|------|------|-------|------|------|---|
|     | 0.1      | 1 b1072 |     | 1.2  | 0.2  | 0     | 1.56 | 0.88 | 0 |
| n/a | n/a      |         | n/a | n/a  |      | 0 n/a | n/a  |      | 0 |
|     | 0.11     | 1 b3671 |     | 1.15 | 0.19 | 0     | 1.46 | 0.55 | 0 |
|     | 0.16     | 0 b3731 |     | 0.58 | 0.1  | 1     | 0.62 | 0.12 | 1 |
|     | 0.09     | 1 b2574 |     | 1.46 | 0.32 | 0     | 1.45 | 0.58 | 0 |
|     | 0.06     | 1 b0195 |     | 0.44 | 0.11 | 1     | 0.87 | 0.15 | 1 |
|     | 0.04     | 1       |     | 0.55 | 0.11 | 1     | 1.01 | 0.31 | 1 |
|     | 0.08     | 1 b2327 |     | 0.79 | 0.17 | 1     | 1.15 | 0.41 | 0 |
|     | 0.05     | 1       |     | 1    | 0.4  | 0     | 1.7  | 0.52 | 0 |
|     | 0.03     | 1 b1703 |     | 0.43 | 0.37 | 1     | 0.62 | 0.2  | 1 |
|     | 0.08     | 1       |     | 0.26 | 0.06 | 1     | 0.07 | 0.02 | 1 |
|     | 0.14     | 1 b3456 |     | 1.36 | 0.55 | 0     | 1.54 | 0.32 | 0 |
|     | 0.07     | 1       |     | 1.55 | 0.24 | 0     | 1.6  | 1.2  | 0 |
|     | 0.13     | 0 b2204 |     | 3.39 | 1.61 | 1     | 1.76 | 0.53 | 0 |
|     | 0.17 n/a |         |     | 1.57 | 0.51 | 0     | 1.95 | 0.57 | 0 |
|     | 0.1      | 1 b4371 |     | 0.81 | 0.29 | 0     | 1.23 | 0.64 | 0 |
|     | 0.08     | 1 b3551 |     | 1.22 | 0.25 | 0     | 1.4  | 0.71 | 0 |
|     | 0.16     | 1       |     | 0.97 | 1.31 | 0     | 1.72 | 0.54 | 0 |
|     | 0.08     | 1 b3163 |     | 1.56 | 0.25 | 1     | 1.37 | 1.29 | 1 |
|     | 0.26     | 0 b2399 |     | 1.28 | 0.66 | 0     | 1.54 | 0.92 | 0 |
|     | 0.12 n/a | b2513   |     | 0.47 | 0.24 | 1     | 0.67 | 0.26 | 1 |
|     | 0.07     | 1       |     | 1.19 | 0.19 | 0     | 1.1  | 1.01 | 1 |
|     | 0.07     | 1       |     | 1.92 | 0.55 | 0     | 1.95 | 0.63 | 0 |
| n/a | n/a      |         | n/a | n/a  |      | 0 n/a | n/a  |      | 0 |
|     | 0.12     | 1 b4386 |     | 1.44 | 0.38 | 1     | 1.05 | 0.61 | 0 |
|     | 0.09     | 1 b3574 |     | 0.99 | 0.34 | 0     | 1.19 | 0.45 | 0 |
|     | 0.09     | 1 b3520 |     | 1.22 | 0.26 | 0     | 1.74 | 0.78 | 0 |
|     | 0.16     | 1       |     | 1.2  | 0.61 | 1     | 1.29 | 0.43 | 0 |
| n/a | n/a      |         | n/a | n/a  |      | 0 n/a | n/a  |      | 0 |
|     | 0.09     | 1       |     | 0.65 | 0.1  | 1     | 0.86 | 0.17 | 1 |
|     | 0.05     | 1       |     | 0.82 | 0.33 | 0     | 0.97 | 0.49 | 1 |
|     | 0.05     | 1 b4114 |     | 0.22 | 0.11 | 1     | 0.2  | 0.04 | 1 |
|     | 0.1      | 1 b1068 |     | 1.34 | 0.27 | 0     | 1.47 | 0.34 | 0 |
|     | 0.13     | 1 b2441 |     | 1.23 | 0.27 | 0     | 1.78 | 0.33 | 0 |
|     | 0.1      | 1 b3887 |     | 1.02 | 0.37 | 0     | 1.4  | 0.35 | 1 |
|     | 0.06     | 1 b0628 |     | 0.63 | 0.06 | 1     | 0.74 | 0.19 | 1 |
|     | 0.09     | 1       |     | 1.42 | 0.48 | 0     | 1.68 | 0.91 | 0 |
|     | 0.04     | 1       |     | 1.28 | 0.26 | 0     | 1.42 | 0.16 | 0 |
|     | 0.11     | 1       |     | 0.73 | 0.16 | 1     | 0.48 | 0.19 | 1 |
|     | 0.04     | 1 b0788 |     | 1.58 | 0.5  | 0     | 1.55 | 0.82 | 0 |
|     | 0.03     | 1 b0765 |     | 1.59 | 0.32 | 1     | 1.75 | 0.45 | 0 |
|     | 0.04     | 1 b1676 |     | 0.41 | 0.1  | 1     | 0.31 | 0.08 | 1 |
|     | 0.03     | 1 b2306 |     | 0.78 | 0.22 | 0     | 1.47 | 0.49 | 0 |
|     | 0.05     | 1 b0074 |     | 0.87 | 0.18 | 0     | 1.16 | 0.17 | 1 |
|     | 0.04     | 1 b0161 |     | 0.51 | 0.08 | 1     | 0.64 | 0.28 | 1 |
|     | 0.13     | 1 b0440 |     | 0.94 | 0.08 | 0     | 0.76 | 0.22 | 1 |
|     | 0.12     | 1 b3290 |     | 1.01 | 0.15 | 1     | 0.69 | 0.4  | 1 |
|     | 0.63     | 0       |     | 1.12 | 0.3  | 0     | 1.46 | 0.62 | 0 |
|     | 0.09     | 1 b0532 |     | 0.56 | 0.13 | 1     | 0.2  | 0.05 | 1 |
|     | 0.06     | 1 b0715 |     | 0.94 | 0.26 | 1     | 1.17 | 0.3  | 1 |
|     | 0.1      | 1 b0729 |     | 0.95 | 0.16 | 1     | 0.27 | 0.05 | 1 |
|     | 0.06     | 1 b4004 |     | 1.11 | 0.25 | 0     | 1.09 | 0.28 | 1 |

|      |     |       |      |      |   |      |      |   |
|------|-----|-------|------|------|---|------|------|---|
| 0.18 | 1   | b3497 | 1.57 | 0.37 | 0 | 1.93 | 0.82 | 0 |
| 0.07 | 1   |       | 1.45 | 0.56 | 0 | 1.24 | 0.65 | 0 |
| 0.13 | n/a |       | 0.64 | 0.22 | 0 | 0.76 | 0.17 | 1 |
| 0.08 | 1   | b2282 | 0.4  | 0.08 | 1 | 0.48 | 0.15 | 1 |
| 0.12 | 1   | b3240 | 1.16 | 0.4  | 0 | 1.5  | 0.57 | 0 |
| 0.11 | n/a |       | 1.28 | 0.4  | 0 | 1.74 | 0.7  | 0 |
| 0.06 | 1   | b2600 | 1.11 | 0.14 | 0 | 1.51 | 0.6  | 0 |
| 0.09 | 1   |       | 1.3  | 0.37 | 0 | 2.03 | 0.8  | 0 |
| 0.1  | 1   | b3883 | 1.4  | 0.25 | 0 | 1.64 | 0.79 | 0 |
| 0.04 | 1   | b3999 | 0.68 | 0.2  | 1 | 1.02 | 0.36 | 1 |
| 0.16 | 0   | b2718 | 1.18 | 0.13 | 0 | 1.38 | 0.7  | 0 |
| 0.04 | 1   | b3876 | 1.61 | 0.54 | 0 | 1.62 | 0.32 | 0 |
| 0.08 | 1   | b0661 | 0.34 | 0.08 | 1 | 0.25 | 0.03 | 1 |
| 0.04 | 1   | b0445 | 0.83 | 0.15 | 0 | 1.19 | 0.33 | 1 |
| 0.13 | 1   | b4070 | 1.16 | 0.55 | 0 | 1.26 | 0.15 | 0 |
| 0.05 | 1   |       | 1.29 | 0.37 | 0 | 1.88 | 0.41 | 0 |
| 0.11 | 1   | b3259 | 0.58 | 0.17 | 0 | 1.19 | 0.34 | 1 |
| 0.09 | 1   | b2813 | 0.45 | 0.06 | 1 | 0.52 | 0.27 | 1 |
| 0.09 | 1   | b2738 | 1.34 | 0.61 | 0 | 1.62 | 0.51 | 0 |
| 0.13 | 1   |       | 0.47 | 0.16 | 1 | 0.88 | 0.32 | 1 |
| 0.09 | 1   |       | 0.62 | 0.22 | 1 | 0.95 | 0.21 | 1 |
| 0.12 | 1   |       | 0.78 | 0.34 | 0 | 1.05 | 0.43 | 0 |
| 0.1  | 1   | b3771 | 0.88 | 0.2  | 0 | 0.98 | 0.52 | 1 |
| 0.1  | 1   |       | 1.2  | 0.39 | 0 | 1.69 | 0.58 | 0 |
| 0.08 | 0   | b3769 | 1.23 | 0.27 | 0 | 1.9  | 0.55 | 0 |
| 0.08 | n/a | b2516 | 0.48 | 0.26 | 1 | 0.7  | 0.28 | 1 |
| 0.05 | 1   | b1176 | 0.44 | 0.06 | 1 | 0.27 | 0.04 | 1 |
| 0.08 | 1   | b1257 | 1.4  | 0.29 | 0 | 1.75 | 0.37 | 0 |
| 0.07 | 1   | b2800 | 1.15 | 0.37 | 0 | 1.23 | 0.6  | 0 |
| 0.07 | 1   | b2753 | 1.27 | 0.24 | 0 | 1.24 | 2.09 | 0 |
| 0.1  | n/a | b3827 | 1.4  | 0.33 | 0 | 1.45 | 0.45 | 0 |
| 0.07 | 1   | b3805 | 0.61 | 0.22 | 1 | 1.01 | 0.18 | 1 |
| 0.11 | 1   | b3981 | 0.43 | 0.13 | 1 | 0.3  | 0.09 | 1 |
| 0.11 | 1   | b1814 | 0.44 | 0.13 | 1 | 0.56 | 0.15 | 1 |
| 0.08 | 1   |       | 0.49 | 0.11 | 1 | 0.77 | 0.15 | 1 |
| 0.05 | 1   | b1206 | 1.17 | 0.22 | 1 | 1.3  | 1.01 | 1 |
| 0.06 | 1   | b1819 | 1.64 | 0.47 | 1 | 1.35 | 0.58 | 1 |
| 0.05 | 1   | b1840 | 0.58 | 0.16 | 1 | 0.96 | 0.15 | 1 |
| 0.09 | 1   | b1866 | 0.31 | 0.05 | 1 | 0.28 | 0.09 | 1 |
| 0.04 | 1   | b0508 | 1.57 | 0.7  | 0 | 1.27 | 0.6  | 0 |
| 0.1  | n/a | b0527 | 0.86 | 0.3  | 0 | 1.48 | 0.43 | 0 |
| 0.09 | n/a |       | 1.03 | 0.4  | 0 | 1.38 | 0.49 | 0 |
| 0.07 | 1   | b1453 | 1.04 | 0.21 | 0 | 1.38 | 0.28 | 0 |
| 0.05 | 1   |       | 1.25 | 0.28 | 0 | 1.69 | 0.39 | 0 |
| 0.04 | n/a |       | 1.11 | 0.43 | 0 | 1.58 | 0.17 | 0 |
| 0.06 | 1   |       | 0.35 | 0.02 | 1 | 0.33 | 0.13 | 1 |
| n/a  | n/a |       | n/a  | n/a  | 0 | n/a  | n/a  | 0 |
| 0.04 | n/a |       | 1.37 | 0.26 | 0 | 1.06 | 3.18 | 1 |
| 0.06 | 1   |       | 1.17 | 0.24 | 0 | 1.5  | 0.58 | 0 |
| 0.04 | 1   | b1285 | 0.99 | 0.17 | 0 | 1.4  | 0.39 | 0 |
| 0.03 | 1   |       | 1.23 | 0.22 | 0 | 1.3  | 0.35 | 0 |
| 0.03 | 1   | b0915 | 0.7  | 0.17 | 1 | 1.01 | 0.27 | 1 |

|      |     |       |      |      |   |      |      |   |
|------|-----|-------|------|------|---|------|------|---|
| 0.08 | 1   | b0893 | 0.47 | 0.16 | 1 | 0.37 | 0.07 | 1 |
| 0.1  | 1   |       | 0.88 | 0.32 | 0 | 1.55 | 0.45 | 0 |
| 0.11 | 1   |       | 1.68 | 0.46 | 0 | 2.01 | 0.55 | 0 |
| 0.12 | n/a |       | 1.24 | 0.46 | 1 | 1.68 | 0.3  | 0 |
| 0.11 | 1   |       | 0.78 | 0.18 | 1 | 0.79 | 0.22 | 1 |
| 0.05 | 1   | b3592 | 0.93 | 0.14 | 1 | 0.93 | 0.32 | 1 |
| 0.15 | n/a |       | 1.22 | 0.25 | 0 | 1.76 | 0.54 | 0 |
| 0.07 | 1   | b3026 | 1.24 | 1.04 | 0 | 1.3  | 0.63 | 0 |
| 0.08 | 1   | b2616 | 7.17 | 0.77 | 1 | 4.94 | 3.93 | 1 |
| 0.13 | n/a | b2896 | 1    | 0.26 | 1 | 1.25 | 0.42 | 0 |
| n/a  | n/a |       | n/a  | n/a  | 0 | n/a  | n/a  | 0 |
| 0.09 | 1   | b3485 | 1.31 | 0.15 | 1 | 1.25 | 0.21 | 1 |
| 0.03 | 1   | b3536 | 0.94 | 0.13 | 1 | 1.66 | 0.66 | 1 |
| 0.05 | 1   | b3654 | 1.06 | 0.35 | 0 | 1.11 | 0.38 | 1 |
| 0.13 | 1   | b2604 | 1.15 | 1.06 | 1 | 0.82 | 0.4  | 1 |
| 0.12 | n/a |       | 0.93 | 0.57 | 0 | 1.79 | 0.85 | 0 |
| 0.1  | 1   | b2942 | 0.48 | 0.56 | 1 | 0.42 | 0.12 | 1 |
| 0.02 | 1   | b0433 | 0.77 | 0.28 | 1 | 0.67 | 0.15 | 1 |
| n/a  | n/a |       | n/a  | n/a  | 0 | n/a  | n/a  | 0 |
| 0.09 | 1   | b2075 | 1.23 | 0.34 | 0 | 1.57 | 1.01 | 0 |
| 0.09 | 1   | b2137 | 1.37 | 0.55 | 0 | 1.65 | 0.68 | 0 |
| 0.14 | 0   | b3293 | 1.39 | 0.58 | 0 | 1.33 | 0.34 | 0 |
| 0.09 | 1   | b0879 | 1.06 | 0.28 | 1 | 1.07 | 0.17 | 1 |
| 0.11 | 1   | b4198 | 1.2  | 0.42 | 0 | 1.05 | 0.43 | 1 |
| 0.14 | 1   | b4261 | 0.87 | 0.43 | 1 | 1.05 | 0.33 | 1 |
| 0.07 | 1   | b0867 | 0.96 | 0.45 | 0 | 1.36 | 0.44 | 0 |
| 0.05 | 1   | b4178 | 1.12 | 0.35 | 1 | 1.01 | 0.2  | 1 |
| 0.08 | 1   | b3118 | 1.63 | 0.37 | 1 | 1.43 | 0.37 | 1 |
| 0.08 | 1   | b2994 | 1.58 | 0.72 | 1 | 1.04 | 0.37 | 1 |
| 0.11 | 0   | b2704 | 2.1  | 0.42 | 1 | 1.59 | 0.52 | 0 |
| 0.08 | 1   | b2712 | 0.79 | 0.12 | 0 | 1.31 | 0.48 | 0 |
| n/a  | n/a |       | n/a  | n/a  | 0 | n/a  | n/a  | 0 |
| 0.15 | 0   | b2720 | 1.33 | 0.3  | 0 | 1.64 | 0.19 | 0 |
| 0.15 | 0   | b2185 | 0.82 | 0.22 | 0 | 0.63 | 0.09 | 1 |
| 0.04 | 1   | b2054 | 1.18 | 0.37 | 0 | 1.76 | 0.52 | 0 |
| 0.06 | 1   |       | 1.28 | 0.62 | 0 | 1.81 | 0.6  | 0 |
| 0.08 | 1   | b1215 | 0.4  | 0.08 | 1 | 0.35 | 0.07 | 1 |
| 0.23 | 0   | b2946 | 1.34 | 0.39 | 0 | 2.25 | 2.19 | 0 |
| 0.06 | 1   |       | 1.06 | 0.62 | 0 | 1.5  | 0.37 | 0 |
| 0.06 | 1   | b0779 | 1.16 | 0.32 | 1 | 1.14 | 1.11 | 1 |
| n/a  | n/a |       | n/a  | n/a  | 0 | n/a  | n/a  | 0 |
| 0.08 | 0   | b3206 | 1.17 | 0.46 | 0 | 1.25 | 0.5  | 1 |
| 0.09 | 1   |       | 0.86 | 0.47 | 0 | 1.51 | 1.63 | 0 |
| 0.06 | 1   | b0820 | 0.66 | 0.19 | 1 | 0.86 | 0.22 | 1 |
| 0.06 | 1   |       | 0.88 | 0.19 | 1 | 0.54 | 0.12 | 1 |
| 0.09 | 1   |       | 1.1  | 0.37 | 0 | 1.46 | 0.46 | 0 |
| 0.13 | 1   |       | 1.07 | 0.24 | 0 | 1.76 | 0.41 | 0 |
| 0.08 | 1   | b2214 | 0.72 | 0.06 | 1 | 0.73 | 0.24 | 1 |
| 0.14 | 0   | b0736 | 0.8  | 0.23 | 0 | 1.26 | 0.8  | 0 |
| 0.11 | 1   |       | 0.83 | 0.24 | 1 | 0.96 | 0.18 | 1 |
| 0.08 | 0   | b3098 | 0.72 | 0.3  | 1 | 1.02 | 0.56 | 1 |
| 0.11 | 0   |       | 1.25 | 0.57 | 0 | 1.65 | 0.44 | 0 |

|     |      |     |       |      |      |   |      |      |   |
|-----|------|-----|-------|------|------|---|------|------|---|
|     | 0.08 | 1   |       | 1.28 | 0.33 | 0 | 1.27 | 0.36 | 1 |
|     | 0.05 | n/a |       | 1.35 | 0.37 | 1 | 0.74 | 0.39 | 1 |
|     | 0.04 | 1   |       | 0.86 | 0.23 | 0 | 1.08 | 0.26 | 1 |
|     | 0.09 | 1   |       | 2.13 | 0.63 | 1 | 0.55 | 0.31 | 1 |
|     | 0.17 | 1   | b3637 | 0.21 | 0.06 | 1 | 0.2  | 0.07 | 1 |
|     | 0.11 | 1   |       | 0.69 | 0.42 | 1 | 0.52 | 0.45 | 1 |
|     | 0.08 | 0   |       | 1.35 | 0.4  | 0 | 1.72 | 0.55 | 0 |
|     | 0.08 | 1   | b1811 | 1.13 | 0.7  | 0 | 1.04 | 0.35 | 1 |
|     | 0.09 | 1   |       | 1.1  | 0.47 | 0 | 1.68 | 0.59 | 0 |
| n/a | n/a  |     |       | n/a  | n/a  | 0 | n/a  | n/a  | 0 |
|     | 0.04 | 1   |       | 1.19 | 0.29 | 1 | 1.03 | 0.67 | 1 |
|     | 0.11 | 1   | b3410 | 1.53 | 0.58 | 0 | 2.08 | 0.82 | 0 |
|     | 0.11 | 1   | b3982 | 0.39 | 0.18 | 1 | 0.42 | 0.25 | 1 |
|     | 0.16 | 1   | b3762 | 0.89 | 0.13 | 1 | 0.93 | 0.6  | 1 |
|     | 0.09 | 1   |       | 0.48 | 0.12 | 1 | 0.79 | 0.41 | 1 |
|     | 0.14 | n/a |       | 0.98 | 0.17 | 0 | 1.34 | 0.61 | 1 |
|     | 0.04 | 1   | b1448 | 1.12 | 0.19 | 0 | 1.64 | 0.36 | 0 |
|     | 0.04 | 1   | b0062 | 1.39 | 0.57 | 0 | 1.61 | 0.4  | 0 |
|     | 0.02 | n/a | b1621 | 0.73 | 0.36 | 0 | 1.15 | 0.44 | 1 |
|     | 0.13 | 0   |       | 1.32 | 0.33 | 0 | 1.78 | 1.14 | 0 |
|     | 0.1  | 1   |       | 1.33 | 0.14 | 0 | 1.54 | 1.06 | 0 |
|     | 0.1  | 1   | b2666 | 1.38 | 0.31 | 0 | 1.87 | 0.61 | 0 |
|     | 0.18 | 0   | b0075 | 1.35 | 0.46 | 0 | 1.78 | 1.21 | 0 |
|     | 0.21 | n/a |       | 1.42 | 0.65 | 0 | 2.14 | 1.04 | 0 |
| n/a | n/a  |     |       | n/a  | n/a  | 0 | n/a  | n/a  | 0 |
|     | 0.06 | n/a |       | 1.19 | 0.89 | 0 | 1.26 | 0.4  | 0 |
|     | 0.16 | 0   | b3672 | 1.2  | 0.47 | 0 | 1.82 | 0.61 | 0 |
|     | 0.08 | 1   | b3170 | 0.48 | 0.1  | 1 | 0.41 | 0.17 | 1 |
|     | 0.09 | 1   | b3176 | 0.56 | 0.11 | 1 | 0.72 | 0.31 | 1 |
|     | 0.05 | 1   |       | 1.39 | 0.23 | 0 | 1.96 | 0.68 | 0 |
| n/a | n/a  |     |       | n/a  | n/a  | 0 | n/a  | n/a  | 0 |
| n/a | n/a  |     |       | n/a  | n/a  | 0 | n/a  | n/a  | 0 |
|     | 0.17 | 1   | b0735 | 1.59 | 0.26 | 1 | 1.45 | 1.05 | 0 |
| n/a | n/a  |     |       | n/a  | n/a  | 0 | n/a  | n/a  | 0 |
| n/a | n/a  |     |       | n/a  | n/a  | 0 | n/a  | n/a  | 1 |
| n/a | n/a  |     |       | n/a  | n/a  | 0 | n/a  | n/a  | 0 |
|     | 0.09 | 1   |       | 1.44 | 0.56 | 0 | 1.38 | 0.16 | 0 |
| n/a | n/a  |     |       | n/a  | n/a  | 0 | n/a  | n/a  | 0 |
| n/a | n/a  |     |       | n/a  | n/a  | 0 | n/a  | n/a  | 0 |
| n/a | n/a  |     |       | n/a  | n/a  | 0 | n/a  | n/a  | 0 |
|     | 0.07 | n/a | b0008 | 0.42 | 0.15 | 1 | 0.2  | 0.07 | 1 |
|     | 0.09 | n/a |       | 1.05 | 0.32 | 1 | 0.3  | 0.08 | 1 |
|     | 0.07 | n/a | b2041 | 0.69 | 0.4  | 1 | 0.65 | 0.17 | 1 |
|     | 0.11 | n/a | b2167 | 1.05 | 1.32 | 0 | 1.14 | 0.28 | 1 |
|     | 0.05 | n/a | b2171 | 0.25 | 0.09 | 1 | 0.4  | 0.15 | 1 |
|     | 0.05 | n/a |       | 1.07 | 0.45 | 0 | 1.61 | 1.19 | 0 |
|     | 0.11 | n/a |       | 1.14 | 0.29 | 1 | 0.73 | 0.22 | 1 |
|     | 0.06 | n/a | b3114 | 1.44 | 0.47 | 1 | 1.41 | 0.58 | 0 |
|     | 0.06 | n/a |       | 0.66 | 0.16 | 1 | 0.91 | 0.32 | 1 |
| n/a | n/a  |     |       | n/a  | n/a  | 0 | n/a  | n/a  | 0 |
| n/a | n/a  |     |       | n/a  | n/a  | 0 | n/a  | n/a  | 0 |
|     | 0.08 | 1   |       | 1.34 | 1.02 | 0 | 1.56 | 0.65 | 0 |

|      |     |       |       |      |   |       |       |   |
|------|-----|-------|-------|------|---|-------|-------|---|
| 0.05 | 1   |       | 1.52  | 0.26 | 0 | 1.86  | 0.42  | 0 |
| 0.05 | 1   |       | 1.14  | 0.38 | 0 | 1.65  | 0.72  | 0 |
| 0.16 | n/a |       | 1.28  | 0.99 | 0 | 2.15  | 0.4   | 0 |
| 0.06 | 1   |       | 1.06  | 0.72 | 1 | 0.76  | 0.38  | 1 |
| 0.08 | 1   |       | 1.48  | 0.44 | 0 | 1.73  | 0.82  | 0 |
| 0.09 | 1   |       | 1.11  | 0.5  | 0 | 1.24  | 0.21  | 1 |
| 0.08 | 1   |       | 10.64 | 7.21 | 1 | 13.31 | 5.74  | 1 |
| 0.07 | 1   |       | 1.82  | 0.47 | 0 | 2.62  | 0.81  | 0 |
| 0.06 | 1   |       | 1.28  | 0.33 | 1 | 1.49  | 0.4   | 1 |
| 0.09 | 1   |       | 1.3   | 0.31 | 0 | 1.33  | 0.93  | 0 |
| 0.08 | 1   |       | 1.28  | 0.37 | 0 | 1.64  | 2.17  | 0 |
| 0.11 | 1   |       | 4.13  | 1.07 | 1 | 4.69  | 2.99  | 1 |
| 0.05 | n/a |       | 0.96  | 0.28 | 0 | 1.35  | 0.3   | 0 |
| 0.13 | 1   |       | 0.9   | 0.39 | 0 | 1.35  | 0.35  | 0 |
| 0.1  | 0   |       | 1.36  | 0.27 | 0 | 1.44  | 0.74  | 0 |
| 0.08 | 1   |       | 1.25  | 0.64 | 0 | 1.98  | 0.51  | 0 |
| 0.08 | 1   |       | 1.2   | 0.63 | 0 | 1.79  | 0.54  | 0 |
| 0.16 | n/a |       | 0.97  | 2.3  | 0 | 1.19  | 0.46  | 1 |
| 0.06 | 1   |       | 1.25  | 0.71 | 0 | 1.43  | 0.16  | 0 |
| 0.07 | n/a |       | 1.63  | 0.86 | 1 | 1.51  | 0.22  | 1 |
| 0.03 | 1   |       | 1.15  | 0.47 | 1 | 0.89  | 0.23  | 1 |
| 0.04 | 1   |       | 1.33  | 0.2  | 0 | 1.6   | 0.68  | 0 |
| 0.1  | n/a |       | 0.94  | 0.39 | 0 | 1.89  | 0.66  | 0 |
| 0.06 | 1   |       | 1.48  | 0.51 | 0 | 1.56  | 0.27  | 0 |
| 0.04 | 1   |       | 1.33  | 0.94 | 1 | 1.14  | 0.51  | 1 |
| 0.07 | 1   | b4349 | 0.51  | 0.24 | 1 | 0.56  | 0.17  | 1 |
| 0.09 | 1   |       | 1.2   | 0.35 | 0 | 1.53  | 0.68  | 1 |
| 0.09 | 1   |       | 0.73  | 0.29 | 1 | 0.6   | 0.44  | 1 |
| 0.18 | 1   |       | 1.05  | 0.55 | 0 | 1.64  | 16.21 | 0 |
| n/a  | n/a |       | n/a   | n/a  | 0 | n/a   | n/a   | 0 |
| n/a  | n/a |       | n/a   | n/a  | 0 | n/a   | n/a   | 0 |
| n/a  | n/a |       | n/a   | n/a  | 0 | n/a   | n/a   | 0 |
| n/a  | n/a |       | n/a   | n/a  | 0 | n/a   | n/a   | 0 |
| n/a  | n/a |       | n/a   | n/a  | 0 | n/a   | n/a   | 0 |
| n/a  | n/a |       | n/a   | n/a  | 0 | n/a   | n/a   | 0 |
| 0.06 | 1   | b4112 | 0.38  | 0.17 | 1 | 0.72  | 0.85  | 1 |
| n/a  | n/a |       | n/a   | n/a  | 0 | n/a   | n/a   | 0 |
| 0.11 | 1   | b3741 | 0.43  | 0.12 | 1 | 0.59  | 0.53  | 1 |
| 0.11 | 1   | b3202 | 1.22  | 0.32 | 1 | 0.6   | 1.1   | 1 |
| 1.99 | 0   | b3030 | 0.35  | 0.13 | 1 | 0.99  | 0.63  | 1 |
| 0.3  | 1   | b3186 | 0.17  | 0.03 | 1 | 0.21  | 0.09  | 1 |
| 0.08 | 1   |       | 0.96  | 0.25 | 0 | 1.31  | 0.99  | 1 |
| 0.11 | 1   | b0096 | 1.78  | 0.2  | 1 | 0.88  | 2.65  | 1 |
| 2.1  | 0   | b0122 | 1.09  | 0.18 | 0 | 1.43  | 0.89  | 0 |
| 1.01 | 1   | b0144 | 0.47  | 0.48 | 1 | 1.13  | 6.47  | 0 |
| 2.74 | 0   |       | 0.57  | 0.66 | 1 | 1.49  | 0.69  | 1 |
| 1.63 | n/a | b1580 | 1.31  | 0.39 | 0 | 1.38  | 0.39  | 0 |
| 0.07 | 1   | b3245 | 0.95  | 0.12 | 0 | 1.04  | 0.52  | 1 |
| 0.04 | 1   | b0626 | 0.96  | 0.24 | 0 | 1.53  | 0.66  | 0 |
| n/a  | n/a |       | n/a   | n/a  | 0 | n/a   | n/a   | 0 |
| 0.04 | 1   | b0681 | 1.64  | 0.47 | 1 | 1.36  | 1.63  | 0 |
| 0.06 | 1   | b0713 | 0.9   | 0.47 | 0 | 1.86  | 0.74  | 0 |

|     |          |         |     |      |      |       |      |      |   |
|-----|----------|---------|-----|------|------|-------|------|------|---|
|     | 0.1      | 1       |     | 1.11 | 0.26 | 0     | 1.67 | 0.57 | 1 |
|     | 0.04     | 1 b2045 |     | 1.29 | 0.23 | 0     | 1.54 | 0.61 | 0 |
| n/a | n/a      |         | n/a | n/a  |      | 0 n/a | n/a  |      | 0 |
|     | 0.04     | 1       |     | 1.48 | 0.4  | 0     | 1.71 | 0.38 | 0 |
| n/a | n/a      |         | n/a | n/a  |      | 0 n/a | n/a  |      | 0 |
|     | 0.09     | 1       |     | 1.3  | 0.16 | 0     | 1.5  | 0.29 | 0 |
| n/a | n/a      |         | n/a | n/a  |      | 0 n/a | n/a  |      | 0 |
|     | 0.03     | 1       |     | 1.28 | 0.26 | 0     | 1.56 | 0.23 | 0 |
| n/a | n/a      |         | n/a | n/a  |      | 0 n/a | n/a  |      | 0 |
|     | 0.14     | 0       |     | 1.68 | 0.45 | 0     | 2.11 | 0.71 | 0 |
|     | 0.07     | 1       |     | 1.27 | 0.25 | 0     | 1.7  | 0.8  | 0 |
|     | 0.03     | 1 b3292 |     | 0.69 | 0.16 | 1     | 0.96 | 0.6  | 1 |
|     | 0.06     | 1 b3356 |     | 0.82 | 0.22 | 1     | 0.97 | 0.6  | 1 |
|     | 0.06     | 1 b0967 |     | 0.86 | 0.15 | 1     | 0.7  | 0.74 | 1 |
|     | 0.07     | 1 b1584 |     | 0.74 | 0.09 | 1     | 0.72 | 1.29 | 1 |
|     | 0.05     | 1 b3349 |     | 0.36 | 0.06 | 1     | 0.2  | 0.3  | 1 |
|     | 0.12     | 1       |     | 1.12 | 0.4  | 0     | 1.4  | 0.74 | 0 |
|     | 0.05     | 1 b1136 |     | 0.59 | 0.11 | 1     | 0.32 | 0.35 | 1 |
|     | 0.09     | 1 b1790 |     | 0.9  | 0.15 | 1     | 1.19 | 0.49 | 1 |
|     | 0.05     | 1 b3350 |     | 1.09 | 0.25 | 0     | 1.63 | 0.62 | 0 |
|     | 0.05     | 1 b1107 |     | 0.65 | 0.07 | 1     | 1.09 | 0.35 | 1 |
|     | 0.04     | 1       |     | 4.46 | 1.51 | 1     | 3.17 | 1.05 | 1 |
| n/a | n/a      |         | n/a | n/a  |      | 0 n/a | n/a  |      | 0 |
|     | 0.07     | 1 b3902 |     | 1.82 | 0.49 | 0     | 1.65 | 0.78 | 0 |
| n/a | n/a      |         | n/a | n/a  |      | 0 n/a | n/a  |      | 0 |
|     | 0.05     | 1 b1515 |     | 1.57 | 0.14 | 1     | 1.31 | 0.59 | 1 |
| n/a | n/a      |         | n/a | n/a  |      | 0 n/a | n/a  |      | 0 |
|     | 0.16     | 0 b2732 |     | 1.66 | 0.52 | 0     | 1.55 | 1.12 | 0 |
|     | 0.05 n/a | b2736   |     | 1.21 | 0.49 | 0     | 1.84 | 0.47 | 0 |
|     | 0.08     | 1       |     | 0.85 | 0.17 | 1     | 1.09 | 0.9  | 1 |
|     | 0.06     | 1 b2395 |     | 1    | 0.17 | 0     | 0.98 | 1.2  | 1 |
| n/a | n/a      |         | n/a | n/a  |      | 0 n/a | n/a  |      | 0 |
|     | 0.11     | 1 b2474 |     | 1.01 | 0.2  | 0     | 1.46 | 0.69 | 0 |
|     | 0.08     | 1       |     | 0.74 | 0.2  | 1     | 1.33 | 0.65 | 1 |
| n/a | n/a      |         | n/a | n/a  |      | 0 n/a | n/a  |      | 0 |
|     | 0.13     | 1 b3920 |     | 0.63 | 0.36 | 0     | 1.3  | 2.35 | 0 |
|     | 0.1      | 1 b4029 |     | 1    | 0.62 | 0     | 1.54 | 0.52 | 0 |
|     | 0.07     | 1       |     | 1.42 | 0.37 | 0     | 1.68 | 0.41 | 0 |
| n/a | n/a      |         | n/a | n/a  |      | 0 n/a | n/a  |      | 0 |
|     | 0.06 n/a | b0858   |     | 1.29 | 0.46 | 0     | 2.23 | 0.63 | 0 |
| n/a | n/a      |         | n/a | n/a  |      | 0 n/a | n/a  |      | 0 |
| n/a | n/a      |         | n/a | n/a  |      | 0 n/a | n/a  |      | 0 |
|     | 0.1      | 1 b2517 |     | 0.26 | 0.13 | 1     | 0.67 | 0.26 | 1 |
|     | 0.02     | 1 b1688 |     | 0.98 | 0.13 | 0     | 1.66 | 0.58 | 0 |
|     | 0.03     | 1 b1907 |     | 1.27 | 5.8  | 0     | 1.6  | 0.79 | 0 |
|     | 0.18     | 0       |     | 1.92 | 0.41 | 0     | 1.62 | 0.76 | 0 |
| n/a | n/a      |         | n/a | n/a  |      | 0 n/a | n/a  |      | 0 |
| n/a | n/a      |         | n/a | n/a  |      | 0 n/a | n/a  |      | 0 |
|     | 0.08     | 1 b4336 |     | 1.55 | 0.34 | 0     | 1.91 | 0.96 | 0 |
|     | 0.3      | 0       |     | 1.29 | 0.3  | 0     | 2.11 | 1.22 | 0 |
|     | 0.07     | 1 b2316 |     | 0.4  | 0.07 | 1     | 1.08 | 0.79 | 1 |
|     | 0.04     | 1       |     | 1.29 | 0.3  | 0     | 2.08 | 1.13 | 0 |

|     |          |         |      |      |       |      |      |   |
|-----|----------|---------|------|------|-------|------|------|---|
|     | 1.92     | 0 b1716 | 0.52 | 0.13 | 1     | 0.74 | 0.44 | 1 |
|     | 0.04     | 1       | 0.7  | 0.22 | 1     | 0.54 | 0.84 | 1 |
|     | 0.05     | 1 b1791 | 1.05 | 0.16 | 0     | 1.81 | 0.56 | 0 |
|     | 0.02     | 1 b0964 | 0.9  | 0.09 | 0     | 1.56 | 0.57 | 0 |
|     | 0.06     | 1       | 0.89 | 0.14 | 1     | 1.37 | 0.45 | 1 |
|     | 0.04     | 1 b2216 | 0.56 | 0.14 | 1     | 0.99 | 0.36 | 1 |
|     | 0.08     | 1 b1913 | 0.62 | 0.22 | 0     | 1.56 | 0.27 | 0 |
| n/a | n/a      |         | n/a  | n/a  | 0 n/a | n/a  |      | 0 |
|     | 0.04     | 1 b2212 | 1.18 | 0.43 | 0     | 2.31 | 0.83 | 0 |
|     | 0.06     | 1       | 1.49 | 0.3  | 1     | 1.42 | 1.03 | 1 |
| n/a | n/a      |         | n/a  | n/a  | 0 n/a | n/a  |      | 0 |
|     | 0.07 n/a | b1636   | 0.79 | 0.19 | 1     | 1.22 | 0.43 | 1 |
|     | 0.05     | 1 b1601 | 1.28 | 0.69 | 0     | 1.68 | 0.5  | 0 |
|     | 0.12     | 1 b4037 | 1.01 | 0.14 | 0     | 1.41 | 0.49 | 0 |
|     | 0.08     | 1 b0994 | 0.87 | 0.12 | 1     | 1.92 | 0.82 | 0 |
|     | 0.17     | 1 b3675 | 1.34 | 0.29 | 0     | 1.99 | 2.2  | 0 |
|     | 0.09     | 1 b0169 | 0.72 | 0.29 | 1     | 0.26 | 0.46 | 1 |
|     | 0.02     | 1 b0369 | 1.54 | 0.15 | 1     | 1.69 | 0.51 | 1 |
|     | 0.07     | 1 b0094 | 1.92 | 0.34 | 1     | 1.28 | 2.65 | 1 |
|     | 0.06     | 1 b2287 | 0.28 | 0.04 | 1     | 0.46 | 0.45 | 1 |
|     | 0.07     | 1 b1266 | 1.39 | 0.31 | 1     | 1.26 | 0.51 | 0 |
|     | 0.06     | 1       | 0.4  | 0.03 | 1     | 0.71 | 0.51 | 1 |
|     | 0.09     | 1       | 1.37 | 0.41 | 0     | 1.87 | 0.65 | 0 |
|     | 0.02 n/a |         | 0.88 | 0.11 | 1     | 0.37 | 0.06 | 1 |
|     | 0.07     | 1       | 0.46 | 0.1  | 1     | 0.27 | 0.17 | 1 |
|     | 0.09     | 1 b3712 | 0.76 | 0.05 | 1     | 1    | 0.3  | 1 |
|     | 0.05     | 1       | 0.37 | 0.13 | 1     | 1.62 | 0.55 | 0 |
|     | 0.08     | 1 b2577 | 1.14 | 0.18 | 0     | 1.58 | 2.17 | 0 |
|     | 0.11     | 1 b3071 | 1.12 | 0.2  | 0     | 1.86 | 0.81 | 0 |
|     | 0.08     | 1 b3424 | 0.99 | 0.28 | 0     | 1.8  | 0.68 | 0 |
| n/a | n/a      |         | n/a  | n/a  | 0 n/a | n/a  |      | 0 |
| n/a | n/a      |         | n/a  | n/a  | 0 n/a | n/a  |      | 0 |
| n/a | n/a      |         | n/a  | n/a  | 0 n/a | n/a  |      | 0 |
|     | 0.07     | 1 b0591 | 1.52 | 0.65 | 0     | 1.6  | 0.56 | 0 |
|     | 0.02     | 1 b4191 | 0.92 | 0.28 | 0     | 1.06 | 0.36 | 0 |
|     | 0.12     | 1 b4260 | 0.61 | 0.08 | 1     | 0.52 | 0.61 | 1 |
|     | 0.08     | 1 b2583 | 2.17 | 0.55 | 1     | 1.9  | 0.86 | 1 |
|     | 0.07     | 1 b3054 | 0.84 | 0.11 | 0     | 1.48 | 0.64 | 0 |
|     | 0.09     | 1 b3116 | 2.92 | 1.37 | 1     | 1.81 | 1.16 | 0 |
|     | 0.09     | 1 b3126 | 4.1  | 0.69 | 1     | 1.84 | 0.8  | 1 |
|     | 0.04     | 1 b2245 | 1.57 | 0.17 | 0     | 1.65 | 0.56 | 0 |
|     | 0.04     | 1 b2496 | 0.82 | 0.09 | 0     | 1.18 | 0.32 | 1 |
|     | 0.04     | 1 b0472 | 0.41 | 0.05 | 1     | 1.16 | 0.53 | 1 |
|     | 0.07     | 1 b0459 | 1.19 | 0.19 | 1     | 1.6  | 0.43 | 1 |
| n/a | n/a      |         | n/a  | n/a  | 0 n/a | n/a  |      | 0 |
|     | 0.03     | 1 b3870 | 0.36 | 0.03 | 1     | 0.34 | 0.35 | 1 |
|     | 0.04     | 1 b0824 | 1.49 | 0.22 | 0     | 1.82 | 1.51 | 0 |
|     | 0.04     | 1 b0728 | 0.88 | 0.24 | 1     | 0.2  | 0.42 | 1 |
|     | 0.05     | 1 b3869 | 0.94 | 0.15 | 0     | 1.18 | 1.16 | 1 |
|     | 0.05     | 1 b2309 | 0.43 | 0.08 | 1     | 0.88 | 0.69 | 1 |
|     | 0.06     | 1 b0080 | 0.39 | 0.05 | 1     | 0.91 | 0.77 | 1 |
|     | 0.06     | 1 b0684 | 0.86 | 0.12 | 1     | 0.81 | 2.31 | 1 |



|      |     |         |      |      |   |      |      |   |
|------|-----|---------|------|------|---|------|------|---|
| 0.04 |     | 1 b0724 | 0.45 | 0.06 | 1 | 0.32 | 0.39 | 1 |
| 0.05 |     | 1 b0181 | 0.58 | 0.08 | 1 | 0.94 | 0.68 | 1 |
| 0.08 |     | 1 b2607 | 0.56 | 0.1  | 1 | 0.23 | 0.19 | 1 |
| 0.04 |     | 1 b4172 | 0.6  | 0.11 | 1 | 0.5  | 0.31 | 1 |
| 0.07 |     | 1 b1210 | 0.77 | 0.16 | 1 | 1.17 | 0.68 | 1 |
| 0.06 |     | 1 b2500 | 0.39 | 0.09 | 1 | 1.1  | 0.28 | 1 |
| 0.03 |     | 1 b0827 | 0.56 | 0.12 | 1 | 0.79 | 0.64 | 1 |
| n/a  | n/a |         | n/a  | n/a  | 0 | n/a  | n/a  | 0 |
| 0.07 |     | 1 b3916 | 0.99 | 0.12 | 1 | 0.92 | 0.45 | 1 |
| 0.04 |     | 1 b0654 | 0.54 | 0.07 | 1 | 1.27 | 0.38 | 0 |
| 0.11 |     | 1 b3279 | 1.21 | 0.16 | 1 | 1.31 | 0.76 | 1 |
| 0.07 |     | 0       | 1.7  | 0.31 | 0 | 1.87 | 0.51 | 0 |
| 0.08 |     | 0       | 1.66 | 2.82 | 0 | 1.83 | 0.93 | 0 |
| 0.07 |     | 1       | 1.6  | 0.35 | 0 | 2.03 | 1.05 | 0 |
| 0.13 |     | 1       | 0.92 | 0.08 | 0 | 1.15 | 0.54 | 0 |
| 0.06 |     | 0 b1915 | 1    | 0.4  | 0 | 1.26 | 0.21 | 0 |
| 0.12 | n/a |         | 1.69 | 0.43 | 0 | 1.24 | 0.73 | 0 |
| 0.09 |     | 1       | 0.88 | 0.31 | 0 | 0.89 | 1.57 | 1 |
| 0.06 |     | 1 b0011 | 1.35 | 0.68 | 0 | 1.29 | 0.73 | 0 |
| 0.05 |     | 1 b0003 | 1.2  | 0.14 | 1 | 1.46 | 0.85 | 0 |
| 0.06 |     | 0       | 1.19 | 0.2  | 0 | 1.55 | 0.87 | 0 |
| 0.24 |     | 0       | 1.5  | 0.26 | 0 | 1.81 | 0.95 | 0 |
| 0.15 | n/a | b3147   | 0.34 | 0.04 | 1 | 0.42 | 0.86 | 1 |
| 0.1  |     | 1       | 0.89 | 0.24 | 0 | 1.31 | 0.6  | 0 |
| n/a  | n/a |         | n/a  | n/a  | 0 | n/a  | n/a  | 0 |
| 0.09 |     | 1 b2148 | 0.8  | 0.15 | 0 | 1.29 | 0.21 | 0 |
| 0.05 |     | 1       | 0.99 | 0.27 | 0 | 1.86 | 0.66 | 0 |
| 0.05 |     | 1 b0150 | 1.31 | 0.15 | 0 | 1.31 | 0.72 | 0 |
| 0.15 | n/a |         | 1.62 | 0.43 | 0 | 2.34 | 0.81 | 0 |
| 0.04 |     | 1 b2285 | 0.47 | 0.06 | 1 | 0.24 | 0.41 | 1 |
| 0.14 |     | 1 b2833 | 1.17 | 0.38 | 0 | 1.89 | 0.29 | 0 |
| 0.1  |     | 1 b3848 | 0.72 | 0.08 | 1 | 0.95 | 1.28 | 1 |
| 0.09 |     | 1 b3824 | 1    | 0.91 | 0 | 1.79 | 0.71 | 0 |
| 0.08 |     | 1 b3802 | 0.91 | 0.07 | 1 | 0.73 | 1.21 | 1 |
| 0.16 |     | 1 b3984 | 0.31 | 0.08 | 1 | 0.2  | 0.16 | 1 |
| 0.08 |     | 1 b3787 | 0.57 | 0.08 | 1 | 1.25 | 0.68 | 1 |
| 0.06 |     | 1 b3972 | 1.35 | 0.29 | 1 | 0.93 | 2.89 | 1 |
| 0.11 |     | 1 b1941 | 1.12 | 0.19 | 0 | 1.43 | 0.46 | 0 |
| 0.08 |     | 1 b2415 | 0.79 | 0.09 | 1 | 0.59 | 0.59 | 1 |
| 0.07 |     | 1 b0064 | 1.25 | 0.19 | 1 | 1.69 | 1.82 | 0 |
| 0.11 |     | 1 b2779 | 0.47 | 0.05 | 1 | 0.18 | 0.39 | 1 |
| 0.07 |     | 1 b3924 | 2.03 | 0.84 | 1 | 1.42 | 0.74 | 1 |
| 0.06 |     | 1 b2024 | 1.31 | 0.43 | 0 | 1.7  | 1.21 | 0 |
| 0.08 |     | 1 b3792 | 0.73 | 0.13 | 0 | 1.1  | 0.32 | 0 |
| 0.13 |     | 1 b3996 | 0.89 | 0.09 | 1 | 1.38 | 0.47 | 1 |
| 0.06 |     | 1       | 0.46 | 0.08 | 1 | 0.65 | 0.23 | 1 |
| 0.03 |     | 1       | 1.98 | 0.42 | 1 | 1.22 | 0.67 | 1 |
| 0.1  |     | 1 b1197 | 0.83 | 0.11 | 0 | 1.6  | 1.23 | 1 |
| 0.05 | n/a | b1423   | 1.45 | 0.4  | 0 | 1.82 | 0.42 | 0 |
| 0.07 |     | 1 b1340 | 1.23 | 0.17 | 0 | 1.36 | 0.77 | 1 |
| 0.04 |     | 1 b0860 | 0.88 | 0.14 | 0 | 0.97 | 0.51 | 1 |
| 0.06 |     | 1       | 1.01 | 0.34 | 0 | 1.83 | 0.4  | 0 |

|     |          |         |      |      |       |      |      |   |
|-----|----------|---------|------|------|-------|------|------|---|
|     | 0.08     | 1 b0920 | 1.06 | 0.11 | 0     | 1.29 | 0.3  | 0 |
|     | 0.09     | 1       | 1.32 | 1.14 | 0     | 1.61 | 0.79 | 0 |
|     | 0.06     | 1 b0599 | 1.41 | 0.19 | 0     | 1.32 | 1.06 | 0 |
|     | 0.07     | 1 b1269 | 0.85 | 3.67 | 1     | 1.01 | 0.59 | 1 |
|     | 0.07 n/a |         | 1.08 | 0.25 | 1     | 1.84 | 1.01 | 1 |
|     | 0.08     | 1 b1808 | 0.57 | 0.26 | 1     | 1.02 | 0.36 | 1 |
|     | 0.08     | 1 b1834 | 0.45 | 0.08 | 1     | 0.77 | 0.32 | 1 |
| n/a | n/a      |         | n/a  | n/a  | 0 n/a | n/a  |      | 0 |
|     | 0.09     | 0 b1862 | 1.25 | 1.73 | 0     | 1.62 | 3.67 | 0 |
|     | 0.06     | 1 b0468 | 1.07 | 0.3  | 0     | 1.4  | 0.28 | 0 |
|     | 0.04     | 1 b0513 | 1.44 | 0.26 | 0     | 1.62 | 2.41 | 0 |
|     | 0.06     | 1       | 0.44 | 0.1  | 1     | 0.49 | 0.42 | 1 |
|     | 0.06     | 1       | 0.91 | 0.12 | 0     | 1.7  | 0.32 | 0 |
| n/a | n/a      |         | n/a  | n/a  | 0 n/a | n/a  |      | 0 |
|     | 0.21 n/a |         | 1.56 | 0.32 | 0     | 2.04 | 0.66 | 0 |
|     | 0.1      | 1       | 3.1  | 1.43 | 1     | 1.3  | 4.49 | 1 |
|     | 0.09     | 1 b3559 | 0.46 | 0.23 | 1     | 1.01 | 0.29 | 1 |
|     | 0.09 n/a | b0739   | 0.68 | 0.09 | 1     | 0.77 | 0.86 | 1 |
| n/a | n/a      |         | n/a  | n/a  | 0 n/a | n/a  |      | 0 |
|     | 0.09     | 1       | 1.09 | 0.14 | 1     | 1.3  | 0.62 | 0 |
|     | 0.06     | 1 b2838 | 1.15 | 0.21 | 1     | 1.36 | 1.23 | 1 |
|     | 0.1      | 1 b2937 | 0.53 | 0.06 | 1     | 1.12 | 0.95 | 1 |
| n/a | n/a      |         | n/a  | n/a  | 0 n/a | n/a  |      | 0 |
|     | 0.07     | 1 b2713 | 1.19 | 0.26 | 0     | 1.91 | 0.67 | 0 |
|     | 0.07     | 1 b3550 | 0.92 | 0.1  | 1     | 1.15 | 0.36 | 0 |
|     | 0.06     | 1       | 1.22 | 0.14 | 0     | 1.59 | 0.69 | 0 |
|     | 0.09     | 1 b2824 | 1.21 | 0.2  | 0     | 1.91 | 0.38 | 0 |
|     | 0.13     | 1       | 0.89 | 0.21 | 0     | 1.53 | 0.45 | 0 |
|     | 0.08     | 1 b2966 | 1.36 | 0.32 | 0     | 1.95 | 0.59 | 0 |
|     | 0.29     | 1 b2992 | 1.47 | 0.09 | 0     | 1.76 | 0.71 | 0 |
|     | 0.12     | 1       | 1.16 | 0.11 | 0     | 2.03 | 0.49 | 0 |
|     | 0.05     | 1 b2129 | 1.05 | 0.3  | 0     | 1.78 | 0.73 | 0 |
|     | 0.07     | 1 b1806 | 0.82 | 0.21 | 1     | 1.6  | 0.6  | 0 |
|     | 0.11     | 1 b3308 | 0.3  | 0.08 | 1     | 0.08 | 0.09 | 1 |
|     | 0.06     | 1       | 1.31 | 0.23 | 0     | 1.52 | 0.99 | 1 |
|     | 0.07     | 1 b3178 | 1.21 | 0.13 | 1     | 0.97 | 3.2  | 1 |
|     | 0.1      | 1 b3064 | 0.57 | 0.14 | 0     | 1.53 | 0.67 | 0 |
|     | 0.14     | 1       | 1.68 | 0.5  | 0     | 1.9  | 0.71 | 0 |
|     | 0.12     | 1 b3192 | 0.9  | 0.09 | 1     | 0.89 | 0.75 | 1 |
|     | 0.13     | 1       | 2.12 | 0.25 | 1     | 1.95 | 1.06 | 0 |
|     | 0.06     | 1       | 0.74 | 0.16 | 1     | 1.29 | 0.6  | 1 |
|     | 0.07     | 1 b0375 | 1.36 | 0.19 | 0     | 1.92 | 1.21 | 0 |
|     | 0.18     | 0 b2099 | 0.99 | 0.14 | 0     | 1.63 | 1.94 | 0 |
|     | 0.16     | 1 b2706 | 1.48 | 0.45 | 0     | 2.19 | 0.72 | 0 |
|     | 0.04     | 1 b2114 | 0.21 | 0.06 | 1     | 0.3  | 0.24 | 1 |
|     | 0.06     | 1 b2182 | 0.87 | 0.15 | 0     | 1.44 | 0.23 | 1 |
|     | 0.07 n/a |         | 1.55 | 0.45 | 0     | 1.69 | 1.55 | 0 |
|     | 0.07     | 1 b2134 | 1.1  | 0.24 | 0     | 1.51 | 1.05 | 0 |
|     | 0.1      | 1       | 0.66 | 0.11 | 1     | 1.32 | 0.37 | 0 |
|     | 0.17     | 0       | 1.44 | 0.52 | 0     | 2.03 | 0.83 | 0 |
|     | 0.07     | 1 b0722 | 0.35 | 0.07 | 1     | 0.27 | 0.76 | 1 |
|     | 0.13 n/a |         | 1.08 | 0.42 | 0     | 1.54 | 0.64 | 0 |



|     |      |     |       |      |      |   |      |      |   |
|-----|------|-----|-------|------|------|---|------|------|---|
|     | 0.05 | n/a | b1917 | 0.97 | 0.12 | 1 | 2.14 | 0.78 | 0 |
|     | 0.07 | n/a |       | 1.15 | 0.25 | 0 | 1.84 | 0.77 | 0 |
|     | 0.04 | n/a | b0161 | 0.4  | 0.06 | 1 | 0.4  | 0.81 | 1 |
| n/a | n/a  |     |       | n/a  | n/a  | 0 | n/a  | n/a  | 0 |
| n/a | n/a  |     |       | n/a  | n/a  | 0 | n/a  | n/a  | 0 |
|     | 0.06 | n/a | b0909 | 0.71 | 0.14 | 0 | 1.28 | 0.67 | 0 |
| n/a | n/a  |     |       | n/a  | n/a  | 0 | n/a  | n/a  | 0 |
| n/a | n/a  |     |       | n/a  | n/a  | 0 | n/a  | n/a  | 0 |
| n/a | n/a  |     |       | n/a  | n/a  | 0 | n/a  | n/a  | 0 |
| n/a | n/a  |     |       | n/a  | n/a  | 0 | n/a  | n/a  | 0 |
| n/a | n/a  |     |       | 1.09 | 0.34 | 1 | 1.1  | 3.18 | 1 |
|     | 0.08 | 1   |       | 0.96 | 0.19 | 1 | 1.11 | 0.75 | 1 |
|     | 0.1  | 1   |       | 0.95 | 0.23 | 1 | 1.91 | 1.2  | 1 |
|     | 0.07 | 1   |       | 0.98 | 0.17 | 0 | 0.98 | 0.65 | 1 |
|     | 0.11 | 1   |       | 0.69 | 0.07 | 1 | 1.12 | 0.73 | 1 |
|     | 0.06 | 1   |       | 1.23 | 0.23 | 0 | 1.42 | 0.38 | 0 |
|     | 0.05 | 1   |       | 1.02 | 0.29 | 0 | 1.38 | 0.76 | 0 |
|     | 0.08 | 1   |       | 1.76 | 0.19 | 1 | 1.13 | 2.06 | 1 |
|     | 0.11 | 1   |       | 1.31 | 0.21 | 0 | 2.19 | 0.63 | 0 |
|     | 0.1  | n/a |       | 1.18 | 0.18 | 1 | 1.25 | 0.46 | 0 |
|     | 0.13 | 1   |       | 1.17 | 0.11 | 0 | 1.71 | 0.55 | 0 |
|     | 0.07 | 1   |       | 0.99 | 0.11 | 0 | 1.31 | 0.5  | 0 |
|     | 0.04 | 1   |       | 1.23 | 0.11 | 0 | 1.58 | 0.4  | 0 |
|     | 0.08 | 0   |       | 1.13 | 0.67 | 0 | 1.4  | 3.61 | 0 |
|     | 0.1  | 1   |       | 0.82 | 0.21 | 1 | 1.6  | 0.59 | 0 |
|     | 0.09 | 1   |       | 1.21 | 0.21 | 1 | 1.46 | 0.28 | 0 |
|     | 0.07 | 1   |       | 1.15 | 0.15 | 0 | 1.55 | 0.19 | 0 |
|     | 0.06 | 1   |       | 1.26 | 0.29 | 1 | 1.62 | 0.62 | 1 |
|     | 0.05 | 1   |       | 1.09 | 0.16 | 1 | 1.18 | 0.46 | 1 |
|     | 0.08 | 1   |       | 1.24 | 0.39 | 0 | 1.62 | 0.5  | 0 |
|     | 0.18 | 1   |       | 1.03 | 0.28 | 0 | 1.55 | 0.55 | 0 |
|     | 0.08 | n/a |       | 1.02 | 0.12 | 0 | 1.97 | 0.62 | 0 |
|     | 0.08 | 1   |       | 0.94 | 0.28 | 1 | 1.13 | 2.25 | 1 |
|     | 0.1  | 1   |       | 1.16 | 0.43 | 0 | 1.84 | 0.97 | 0 |
|     | 0.09 | 1   |       | 1.57 | 0.59 | 0 | 1.37 | 0.68 | 0 |
|     | 0.08 | 1   |       | 0.96 | 0.27 | 0 | 1.23 | 0.77 | 1 |
|     | 0.11 | 1   |       | 1.16 | 0.32 | 0 | 1.44 | 0.21 | 0 |
|     | 0.04 | 1   | b3546 | 0.85 | 0.12 | 1 | 1.31 | 0.73 | 1 |
|     | 0.07 | 1   |       | 0.86 | 0.19 | 1 | 1.32 | 0.58 | 1 |
|     | 0.09 | 1   |       | 1.02 | 0.31 | 0 | 1.46 | 0.15 | 0 |
|     | 0.04 | 1   |       | 0.92 | 0.21 | 1 | 1.27 | 0.63 | 1 |
| n/a | n/a  |     |       | n/a  | n/a  | 0 | n/a  | n/a  | 0 |
| n/a | n/a  |     |       | n/a  | n/a  | 0 | n/a  | n/a  | 0 |
| n/a | n/a  |     |       | n/a  | n/a  | 0 | n/a  | n/a  | 0 |
| n/a | n/a  |     |       | n/a  | n/a  | 0 | n/a  | n/a  | 0 |
| n/a | n/a  |     |       | n/a  | n/a  | 0 | n/a  | n/a  | 0 |
| n/a | n/a  |     |       | n/a  | n/a  | 0 | n/a  | n/a  | 0 |
|     |      |     |       | 1    | 0    | 1 | 1    | 0    | 1 |

MEDIAN\_F STD\_DEV THRESHO MEDIAN\_F STD\_DEV THRESHOLD

|      |      |   |      |      |   |
|------|------|---|------|------|---|
|      |      | 1 | 1.22 | 3.11 | 0 |
| 3.19 | 1.82 | 0 | 1.37 | 0.4  | 0 |
| 0.74 | 0.24 | 0 | 1.09 | 0.39 | 0 |
|      |      | 0 | 1.08 | 0.4  | 0 |
| 1.84 | 2.37 | 0 | 1.2  | 0.22 | 0 |
| 0.5  | 0.9  | 1 | 1.13 | 0.5  | 0 |
| 0.93 | 0.2  | 1 | 0.96 | 0.24 | 0 |
| 1.8  | 0.37 | 0 | 1.16 | 0.25 | 0 |
| 1.25 | 0.32 | 1 | 1.01 | 0.06 | 0 |
| 0.89 | 0.1  | 1 | 1.36 | 0.26 | 0 |
| 1.52 | 0.58 | 0 | 1.64 | 0.36 | 0 |
| 1.29 | 0.2  | 0 | 0.96 | 0.38 | 0 |
| 1.46 | 0.25 | 1 | 1.17 | 0.54 | 0 |
| 0.88 | 0.08 | 1 | 0.98 | 0.14 | 0 |
| 0.92 | 0.07 | 1 | 0.87 | 0.29 | 0 |
|      |      | 0 | 0.78 | 0.33 | 0 |
| 2.33 | 1.3  | 1 | 1.41 | 0.72 | 0 |
| 1.18 | 0.13 | 1 | 0.87 | 0.09 | 0 |
| 1.07 | 0.37 | 0 | 1.49 | 0.24 | 0 |
| 1.56 | 2.07 | 0 | 1.32 | 0.75 | 0 |
| 1.46 | 0.39 | 0 | 1.08 | 0.52 | 0 |
| 1.57 | 0.38 | 0 | 1.28 | 0.5  | 0 |
| 1.52 | 0.17 | 0 | 1.29 | 0.28 | 0 |
|      |      | 0 | 1.1  | 0.23 | 0 |
| 1.85 | 0.55 | 0 | 0.98 | 0.3  | 0 |
| 1.36 | 0.32 | 0 | 0.94 | 0.32 | 0 |
| 1.01 | 0.24 | 0 | 1.03 | 0.41 | 0 |
| 1.21 | 1.95 | 0 | 0.9  | 0.13 | 0 |
| n/a  | n/a  | 0 | n/a  | n/a  | 0 |
| 0.94 | 0.23 | 1 | 1.29 | 0.53 | 0 |
| n/a  | n/a  | 0 | n/a  | n/a  | 0 |
| 0.91 | 0.12 | 1 | 1.08 | 0.16 | 0 |
| 1.08 | 0.19 | 1 | 0.96 | 0.38 | 0 |
| 2.01 | 0.51 | 0 | 1.21 | 0.55 | 0 |
|      |      | 1 | 0.98 | 0.22 | 0 |
| 0.98 | 0.29 | 0 | 0.92 | 0.25 | 0 |
| 1.71 | 0.48 | 0 | 1.32 | 0.3  | 0 |
| 2.84 | 0.85 | 0 | 1.06 | 0.39 | 0 |
|      |      | 0 | 1.1  | 0.54 | 0 |
| 1.22 | 0.2  | 0 | 0.94 | 0.55 | 0 |
| n/a  | n/a  | 0 | n/a  | n/a  | 0 |

|     |      |      |       |      |      |   |
|-----|------|------|-------|------|------|---|
|     | 1.69 | 1.08 | 0     | 1.11 | 0.32 | 0 |
|     | 1.85 | 0.02 | 0     | 0.95 | 7.21 | 0 |
|     | 1.38 | 0.44 | 0     | 0.92 | 0.1  | 0 |
|     | 1.07 | 0.15 | 0     | 0.85 | 0.34 | 0 |
|     | 1.88 | 1.4  | 0     | 1.05 | 0.3  | 0 |
| n/a | n/a  |      | 0 n/a | n/a  |      | 0 |
|     |      |      | 1     | 1.12 | 0.26 | 0 |
| n/a | n/a  |      | 0 n/a | n/a  |      | 0 |
|     | 1.25 | 0.28 | 0     | 0.98 | 0.27 | 0 |
| n/a | n/a  |      | 0 n/a | n/a  |      | 0 |
|     | 1.14 | 0.35 | 0     | 1.1  | 0.27 | 0 |
| n/a | n/a  |      | 0 n/a | n/a  |      | 0 |
|     | 1.15 | 3.18 | 0     | 0.8  | 0.21 | 0 |
|     | 0.91 | 0.07 | 1     | 1.15 | 0.06 | 0 |
|     | 1.38 | 0.91 | 0     | 1.49 | 0.53 | 0 |
|     | 1.52 | 0.43 | 0     | 0.91 | 0.54 | 0 |
| n/a | n/a  |      | 0 n/a | n/a  |      | 0 |
|     | 0.72 | 0.22 | 1     | 0.91 | 0.45 | 0 |
|     | 1.2  | 0.4  | 0     | 1.02 | 0.5  | 0 |
|     | 1.69 | 0.1  | 0     | 1.06 | 0.2  | 0 |
|     | 1.51 | 0.16 | 0     | 0.92 | 0.45 | 0 |
|     |      |      | 0     | 0.94 | 0.22 | 0 |
|     | 0.94 | 0.24 | 1     | 0.88 | 0.18 | 0 |
|     | 1.08 | 1.56 | 0     | 1.06 | 0.28 | 0 |
|     | 1.52 | 1.29 | 0     | 0.69 | 0.22 | 0 |
|     | 1.76 | 0.39 | 1     | 1.45 | 0.25 | 0 |
|     | 0.96 | 0.27 | 1     | 1.14 | 0.36 | 0 |
| n/a | n/a  |      | 0 n/a | n/a  |      | 0 |
|     | 1.98 | 2.02 | 0     | 0.89 | 0.34 | 0 |
|     | 1.48 | 0.3  | 0     | 0.71 | 0.18 | 0 |
|     | 1.3  | 0.46 | 0     | 0.91 | 0.14 | 0 |
|     | 2.68 | 1.1  | 1     | 1.34 | 0.4  | 0 |
|     | 2.76 | 0.93 | 0     | 1.29 | 0.34 | 0 |
|     | 1.12 | 0.58 | 0     | 1.24 | 0.28 | 0 |
|     | 0.66 | 0.17 | 1     | 1.26 | 0.2  | 0 |
|     | 1.58 | 0.26 | 0     | 1.12 | 0.42 | 0 |
|     | 0.71 | 0.88 | 1     | 1.04 | 0.3  | 0 |
|     | 2.21 | 0.43 | 0     | 0.99 | 1.06 | 0 |
| n/a | n/a  |      | 0 n/a | n/a  |      | 0 |
|     | 1.37 | 0.07 | 0     | 1.23 | 0.29 | 0 |
|     | 0.92 | 0.23 | 1     | 1.32 | 0.21 | 0 |
|     | 1.17 | 0.12 | 0     | 1.08 | 0.27 | 0 |
|     | 0.56 | 0.15 | 1     | 0.82 | 0.22 | 0 |
|     | 0.63 | 0.07 | 1     | 0.9  | 0.24 | 0 |
|     | 1.66 | 0.48 | 0     | 1.4  | 0.32 | 0 |
|     |      |      | 1     | 1.11 | 0.29 | 0 |
|     |      |      | 1     | 1.22 | 0.36 | 0 |
|     | 1.35 | 0.07 | 0     | 0.94 | 0.15 | 0 |
|     | 0.66 | 0.05 | 1     | 0.87 | 0.14 | 0 |
| n/a | n/a  |      | 0 n/a | n/a  |      | 0 |
|     | 1.93 | 0.19 | 0     | 1.27 | 0.26 | 0 |
|     | 2.2  | 0.49 | 0     | 1.04 | 0.98 | 0 |

|     |       |      |       |      |      |   |
|-----|-------|------|-------|------|------|---|
|     | 1.83  | 0.39 | 0     | 1.08 | 4.29 | 0 |
|     | 1.97  | 0.43 | 0     | 1.23 | 0.29 | 0 |
|     | 1.09  | 0.21 | 0     | 0.87 | 0.41 | 0 |
|     | 0.36  | 0.15 | 1     | 1.38 | 0.28 | 0 |
|     | 1.88  | 1.14 | 0     | 0.63 | 0.39 | 0 |
|     | 0.68  | 0.03 | 1     | 1.07 | 0.72 | 0 |
|     | 0.64  | 0.24 | 1     | 0.88 | 0.31 | 0 |
|     | 0.15  | 0.04 | 1     | 1.04 | 0.31 | 0 |
|     | 0.72  | 0.14 | 1     | 0.97 | 0.14 | 0 |
|     |       |      | 0     | 0.96 | 0.31 | 0 |
|     | 1.35  | 0.34 | 0     | 1.21 | 0.31 | 0 |
|     | 0.85  | 0.19 | 1     | 1.13 | 0.27 | 0 |
|     | 1.1   | 0.08 | 1     | 0.95 | 0.33 | 0 |
| n/a | n/a   |      | 0 n/a | n/a  |      | 0 |
|     | 1.59  | 0.31 | 0     | 1    | 0.15 | 0 |
|     | 2.34  | 0.82 | 0     | 1.29 | 0.55 | 0 |
|     | 2.15  | 0.78 | 0     | 1.06 | 0.48 | 0 |
|     | 1.56  | 0.32 | 0     | 1.13 | 0.2  | 0 |
|     | 1.83  | 0.49 | 0     | 1.02 | 0.42 | 0 |
|     | 1.59  | 0.22 | 0     | 1.21 | 0.16 | 0 |
|     | 1.58  | 0.47 | 0     | 0.91 | 0.41 | 0 |
|     | 2.21  | 0.31 | 0     | 0.91 | 0.21 | 0 |
|     | 1.58  | 0.27 | 0     | 1.21 | 0.38 | 0 |
|     | 1.76  | 0.14 | 0     | 1.13 | 0.42 | 0 |
|     | 1.84  | 0.21 | 0     | 1.2  | 0.32 | 0 |
|     | 1.23  | 0.52 | 0 n/a | n/a  |      | 0 |
| n/a | n/a   |      | 0 n/a | n/a  |      | 0 |
|     | 24.98 | 5.67 | 1     | 1.75 | 1.16 | 0 |
|     | 1.75  | 0.07 | 0     | 1.14 | 0.25 | 0 |
|     | 1.09  | 0.36 | 1     | 1.04 | 0.29 | 0 |
|     | 1.64  | 0.36 | 0     | 0.97 | 0.19 | 0 |
|     |       |      | 0     | 1.14 | 0.47 | 0 |
|     | 1.19  | 0.3  | 1     | 1.21 | 0.37 | 0 |
|     | 2.26  | 1.16 | 0     | 1.19 | 0.56 | 0 |
|     | 1.37  | 0.33 | 0     | 1.22 | 0.49 | 0 |
|     |       |      | 0     | 1.12 | 0.46 | 0 |
|     | 0.72  | 0.12 | 1     | 0.99 | 0.41 | 0 |
|     | 0.59  | 0.12 | 1     | 0.99 | 0.2  | 0 |
|     | 1.3   | 0.53 | 0     | 1.27 | 0.27 | 0 |
|     | 2.33  | 0.4  | 0     | 0.83 | 0.14 | 0 |
|     | 1.56  | 0.8  | 0     | 1.18 | 0.2  | 0 |
|     | 1.34  | 0.23 | 0     | 1.27 | 0.2  | 0 |
|     | 1.56  | 0.34 | 0     | 0.99 | 0.43 | 0 |
|     | 1.1   | 0.27 | 0     | 0.99 | 1.77 | 0 |
|     | 2.07  | 0.07 | 0     | 0.97 | 0.19 | 0 |
|     | 1.37  | 0.29 | 1     | 1.06 | 0.24 | 0 |
|     | 2.16  | 0.47 | 0     | 0.88 | 0.2  | 0 |
|     | 1.78  | 0.32 | 0     | 0.89 | 0.08 | 0 |
|     | 1.64  | 0.54 | 1     | 1.48 | 0.36 | 0 |
|     | 1.3   | 0.16 | 0     | 0.96 | 0.15 | 0 |
|     |       |      | 0     | 0.96 | 0.26 | 0 |
|     | 1.54  | 0.28 | 0     | 1.21 | 0.56 | 0 |

|      |      |   |      |      |   |
|------|------|---|------|------|---|
| 1.27 | 0.86 | 0 | 0.94 | 0.41 | 0 |
| 0.85 | 0.23 | 0 | 1.15 | 0.3  | 0 |
| 1.47 | 0.21 | 0 | 1.02 | 0.34 | 0 |
| 0.98 | 0.27 | 0 | 1    | 0.37 | 0 |
| 1.42 | 0.13 | 0 | 1.07 | 0.22 | 0 |
| 1.52 | 0.24 | 0 | 1.31 | 0.37 | 0 |
|      |      | 0 | 0.98 | 0.29 | 0 |
| 1.54 | 0.12 | 0 | 0.92 | 0.31 | 0 |
| 0.92 | 0.12 | 1 | 1.59 | 0.38 | 0 |
| 1.43 | 0.26 | 0 | 1.1  | 0.41 | 0 |
| 1.22 | 0.3  | 0 | 1.09 | 0.28 | 0 |
| 1.75 | 0.18 | 0 | 0.91 | 0.17 | 0 |
| 1.27 | 0.32 | 1 | 0.94 | 0.23 | 0 |
| 1.6  | 0.25 | 0 | 1.03 | 0.16 | 0 |
| 1.46 | 0.21 | 0 | 1    | 0.18 | 0 |
| 1.4  | 0.13 | 0 | 1.32 | 0.55 | 0 |
| 1.35 | 7.45 | 0 | 0.98 | 0.13 | 0 |
| 0.48 | 0.06 | 1 | 1.18 | 0.24 | 0 |
| 0.38 | 0.1  | 1 | 1.54 | 0.35 | 0 |
| 1.96 | 0.28 | 0 | 1.11 | 0.38 | 0 |
| 0.79 | 0.11 | 1 | 1.18 | 0.33 | 0 |
| 1.2  | 0.35 | 0 | 1    | 0.29 | 0 |
| 1.54 | 1.09 | 0 | 1.29 | 0.34 | 0 |
| 1.39 | 0.18 | 0 | 1.02 | 0.28 | 0 |
| 0.65 | 0.29 | 1 | 1.29 | 0.47 | 0 |
| 1.11 | 4.21 | 0 | 1.1  | 0.16 | 0 |
| 0.65 | 0.17 | 1 | 1.5  | 0.56 | 0 |
| 1.63 | 0.32 | 1 | 1.73 | 0.64 | 0 |
| n/a  | n/a  | 0 | n/a  | n/a  | 0 |
| 2.03 | 0.32 | 0 | 1.22 | 0.25 | 0 |
|      |      | 0 | 1.12 | 0.29 | 0 |
| 1.47 | 0.35 | 0 | 1    | 0.1  | 0 |
| 1.61 | 0.63 | 0 | 1.04 | 0.17 | 0 |
| 1.03 | 0.11 | 1 | 0.79 | 0.25 | 0 |
| 1.53 | 0.33 | 0 | 0.77 | 0.11 | 0 |
| 2.14 | 0.42 | 0 | 1.21 | 0.37 | 0 |
| 1.23 | 0.33 | 0 | 1.45 | 0.2  | 0 |
| 1.57 | 0.08 | 0 | 1.1  | 0.58 | 0 |
|      |      | 1 | 1.04 | 0.36 | 0 |
| 1.84 | 0.52 | 0 | 1    | 0.3  | 0 |
| 1.62 | 0.27 | 0 | 1.29 | 0.29 | 0 |
| 0.96 | 0.18 | 0 | 2.15 | 1.15 | 0 |
| 0.89 | 0.7  | 1 | 1.05 | 0.26 | 0 |
| 1.13 | 0.1  | 1 | 1.04 | 0.33 | 0 |
| 1.12 | 0.14 | 0 | 0.88 | 0.21 | 0 |
| 0.91 | 0.16 | 1 | 0.98 | 0.29 | 0 |
| 1.88 | 0.14 | 0 | 0.87 | 0.28 | 0 |
| 1.9  | 0.37 | 0 | 0.95 | 0.14 | 0 |
|      |      | 1 | 1.46 | 0.75 | 1 |
| 2.05 | 0.32 | 0 | 1.29 | 0.29 | 0 |
| 1.63 | 0.5  | 0 | 0.9  | 0.16 | 0 |
| n/a  | n/a  | 0 | n/a  | n/a  | 0 |



|     |      |      |       |      |      |   |
|-----|------|------|-------|------|------|---|
|     | 1.84 | 0.32 | 0     | 1.08 | 0.25 | 0 |
|     | 1.2  | 0.49 | 0     | 1.08 | 0.4  | 0 |
|     | 1.23 | 1.14 | 0     | 1.13 | 0.31 | 0 |
|     | 1.71 | 0.49 | 0     | 1.04 | 0.18 | 0 |
|     | 1.09 | 0.08 | 0     | 1.37 | 0.23 | 0 |
|     | 1.15 | 2.88 | 0     | 0.99 | 0.43 | 0 |
|     | 0.86 | 0.24 | 1     | 1.23 | 0.69 | 1 |
|     | 1.01 | 1.44 | 0     | 1.09 | 0.27 | 0 |
|     | 1.48 | 0.2  | 1     | 2.52 | 0.42 | 0 |
|     | 0.86 | 0.13 | 0     | 0.81 | 0.1  | 0 |
|     | 1.01 | 0.29 | 0     | 0.97 | 0.19 | 0 |
|     | 1.44 | 0.29 | 0     | 0.88 | 0.52 | 0 |
|     | 1.83 | 0.2  | 0     | 0.83 | 0.61 | 0 |
|     | 1.78 | 0.17 | 0     | 1.15 | 0.3  | 0 |
|     | 0.6  | 0.62 | 1     | 1.03 | 0.1  | 0 |
|     | 1.7  | 0.53 | 0     | 1    | 0.47 | 0 |
|     | 1.47 | 0.11 | 0     | 0.78 | 0.2  | 0 |
|     | 1.77 | 0.1  | 0     | 1.18 | 0.35 | 0 |
|     | 1.55 | 0.32 | 0     | 0.97 | 0.27 | 0 |
|     | 1.87 | 0.65 | 0     | 1.08 | 0.78 | 0 |
| n/a | n/a  |      | 0 n/a | n/a  |      | 0 |
|     | 1.45 | 0.02 | 0     | 1.11 | 0.26 | 0 |
|     | 1.11 | 0.14 | 1     | 1.06 | 0.24 | 0 |
|     | 1.16 | 0.14 | 1     | 1.04 | 0.22 | 0 |
|     | 2.19 | 0.55 | 0     | 1.07 | 0.27 | 0 |
|     | 1.05 | 0.46 | 0     | 1.12 | 0.26 | 0 |
|     | 0.96 | 0.32 | 1     | 1.67 | 0.38 | 0 |
|     | 2.08 | 0.35 | 0     | 1.06 | 0.24 | 0 |
|     | 2    | 0.29 | 0     | 0.95 | 0.2  | 0 |
|     | 2.06 | 0.45 | 0     | 0.88 | 0.47 | 0 |
|     | 1.56 | 0.28 | 0     | 1    | 0.3  | 0 |
|     | 1.21 | 0.12 | 1     | 1.21 | 0.14 | 0 |
|     | 1.02 | 0.15 | 1     | 0.93 | 0.31 | 0 |
|     | 1.59 | 0.7  | 0     | 0.98 | 0.76 | 0 |
| n/a | n/a  |      | 0 n/a | n/a  |      | 0 |
|     | 1.02 | 0.9  | 0     | 0.92 | 0.26 | 0 |
|     | 0.8  | 0.24 | 0     | 0.94 | 0.23 | 0 |
|     | 2.02 | 0.21 | 1     | 2.66 | 1.56 | 1 |
|     | 1.1  | 0.92 | 0     | 0.95 | 0.17 | 0 |
|     | 1.24 | 0.12 | 0     | 0.98 | 0.4  | 0 |
|     | 1.69 | 0.36 | 0     | 1.08 | 0.42 | 0 |
|     | 1.24 | 0.06 | 0     | 1.09 | 0.3  | 0 |
|     | 1.42 | 0.17 | 0     | 1.12 | 0.37 | 0 |
| n/a | n/a  |      | 0 n/a | n/a  |      | 0 |
| n/a | n/a  |      | 0 n/a | n/a  |      | 0 |
| n/a | n/a  |      | 0 n/a | n/a  |      | 0 |
|     | 1.2  | 0.23 | 0     | 1.08 | 0.35 | 0 |
|     | 1.1  | 0.37 | 0     | 1.35 | 0.23 | 0 |
| n/a | n/a  |      | 0 n/a | n/a  |      | 0 |
|     | 1.82 | 0.85 | 0     | 0.93 | 0.17 | 0 |
|     | 1.47 | 0.23 | 0     | 1.15 | 0.25 | 0 |
|     | 1.49 | 0.26 | 0     | 1.03 | 0.12 | 0 |

|     |       |      |       |      |      |   |
|-----|-------|------|-------|------|------|---|
|     | 0.72  | 0.06 | 1     | 2.43 | 1.09 | 1 |
|     | 1.18  | 0.2  | 1     | 1.61 | 0.32 | 0 |
|     | 1.16  | 0.37 | 0     | 0.85 | 0.16 | 0 |
| n/a | n/a   |      | 0 n/a | n/a  |      | 0 |
| n/a | n/a   |      | 0 n/a | n/a  |      | 0 |
|     | 2.02  | 0.53 | 0     | 1.29 | 0.59 | 0 |
|     | 1.6   | 0.44 | 0     | 1.33 | 0.53 | 0 |
|     | 1.35  | 0.3  | 0     | 1.15 | 0.11 | 0 |
|     | 1.3   | 0.3  | 1     | 1.19 | 0.37 | 0 |
|     | 1.41  | 0.07 | 0     | 1.04 | 8.02 | 0 |
|     | 0.49  | 0.07 | 1     | 1.55 | 0.38 | 0 |
|     | 1.86  | 0.23 | 0     | 0.91 | 0.34 | 0 |
|     | 2.64  | 0.4  | 1     | 1.99 | 0.47 | 0 |
|     | 1.47  | 0.25 | 0     | 1.11 | 0.28 | 0 |
| n/a | n/a   |      | 0 n/a | n/a  |      | 0 |
| n/a | n/a   |      | 0 n/a | n/a  |      | 0 |
|     | 1.49  | 0.18 | 0     | 0.93 | 0.22 | 0 |
|     | 10.99 | 6.31 | 0 n/a | n/a  |      | 0 |
|     | 1.9   | 0.32 | 0     | 0.85 | 0.07 | 0 |
| n/a | n/a   |      | 0 n/a | n/a  |      | 0 |
|     | 1.82  | 0.19 | 0     | 0.82 | 0.29 | 0 |
|     | 7.87  | 1.29 | 1     | 1.35 | 0.29 | 0 |
|     | 1.78  | 0.89 | 0     | 1.07 | 0.24 | 0 |
|     | 1.36  | 0.8  | 0     | 1.17 | 0.6  | 0 |
|     | 1.08  | 0.18 | 0     | 1.29 | 0.45 | 0 |
| n/a | n/a   |      | 0 n/a | n/a  |      | 0 |
| n/a | n/a   |      | 0 n/a | n/a  |      | 0 |
| n/a | n/a   |      | 0 n/a | n/a  |      | 0 |
| n/a | n/a   |      | 0 n/a | n/a  |      | 0 |
| n/a | n/a   |      | 0 n/a | n/a  |      | 0 |
| n/a | n/a   |      | 0 n/a | n/a  |      | 0 |
| n/a | n/a   |      | 0 n/a | n/a  |      | 0 |
| n/a | n/a   |      | 0 n/a | n/a  |      | 0 |
| n/a | n/a   |      | 0 n/a | n/a  |      | 0 |
|     | 1.1   | 0.18 | 1     | 1.04 | 0.07 | 0 |
|     | 0.92  | 0.38 | 1     | 0.96 | 0.5  | 0 |
|     | 1.34  | 0.42 | 0     | 1.01 | 0.15 | 0 |
|     | 1     | 0.33 | 1     | 1.01 | 0.15 | 0 |
|     | 1.24  | 0.36 | 0     | 1.03 | 0.15 | 0 |
|     |       |      | 1     | 1.38 | 0.78 | 1 |
|     | 2.01  | 0.32 | 1     | 1.04 | 0.2  | 0 |
|     | 1.82  | 0.04 | 0     | 1.09 | 0.17 | 0 |
|     | 0.98  | 0.35 | 0     | 2.41 | 0.56 | 0 |
|     | 1.41  | 0.37 | 0     | 1.09 | 0.48 | 0 |
|     | 1.06  | 0.17 | 0     | 1.26 | 0.22 | 0 |
|     | 1.25  | 0.3  | 0     | 1.02 | 0.26 | 0 |
|     | 0.82  | 0.13 | 1     | 1.93 | 0.3  | 0 |
|     | 5.55  | 0.7  | 1     | 8    | 5.3  | 1 |
|     | 1.33  | 0.17 | 0     | 0.81 | 0.12 | 0 |
|     | 1.23  | 0.19 | 0     | 0.94 | 0.14 | 0 |
|     | 1.36  | 0.39 | 0     | 0.95 | 0.27 | 0 |
|     | 1.4   | 0.21 | 0     | 0.96 | 0.19 | 0 |

|      |      |   |      |      |   |
|------|------|---|------|------|---|
| 1.45 | 0.47 | 0 | 1.45 | 0.29 | 0 |
| 1.15 | 0.14 | 0 | 0.94 | 0.18 | 0 |
| 1.21 | 0.28 | 0 | 1    | 0.24 | 0 |
| 1.52 | 0.19 | 0 | 0.89 | 0.11 | 0 |
| 2.12 | 0.78 | 0 | 0.85 | 0.29 | 0 |
| 1.24 | 1.09 | 0 | 1.09 | 0.31 | 0 |
| 1.16 | 0.88 | 0 | 1.02 | 0.59 | 0 |
| 1.08 | 0.26 | 0 | 1.02 | 0.43 | 0 |
| 1.72 | 0.33 | 0 | 1.14 | 0.37 | 0 |
| 1.28 | 0.12 | 0 | 1.15 | 0.92 | 0 |
| 1.67 | 0.35 | 0 | 1.14 | 0.54 | 0 |
| 1.26 | 0.13 | 0 | 0.85 | 0.14 | 0 |
| 1.25 | 0.07 | 0 | 1.04 | 1.47 | 0 |
| 0.96 | 0.3  | 0 | 0.93 | 0.11 | 0 |
| 1.6  | 0.08 | 0 | 1.01 | 0.18 | 0 |
| 0.7  | 0.09 | 1 | 0.86 | 0.16 | 0 |
| 1.56 | 0.1  | 0 | 1.09 | 0.08 | 0 |
| 1.28 | 0.28 | 0 | 0.87 | 0.48 | 0 |
| 1.3  | 0.15 | 0 | 0.97 | 0.21 | 0 |
| 0.44 | 0.03 | 1 | 0.52 | 0.3  | 1 |
| 1.21 | 0.1  | 1 | 1.28 | 0.65 | 0 |
| 1.18 | 0.27 | 0 | 1.02 | 1.5  | 0 |
| 1.66 | 0.03 | 0 | 0.87 | 0.24 | 0 |
| 1.26 | 0.34 | 1 | 1.06 | 0.52 | 0 |
| 1.55 | 0.15 | 0 | 0.95 | 0.17 | 0 |
| 0.86 | 0.09 | 1 | 1.07 | 0.41 | 0 |
| 1.44 | 0.36 | 0 | 1.02 | 0.4  | 0 |
| 1.58 | 0.56 | 0 | 1.07 | 0.5  | 0 |
| 1.94 | 0.48 | 0 | 0.89 | 0.19 | 0 |
| 0.55 | 0.15 | 1 | 0.93 | 0.51 | 0 |
| 1.69 | 0.25 | 0 | 0.81 | 0.36 | 0 |
| n/a  | n/a  | 0 | n/a  | n/a  | 0 |
| 1.12 | 0.35 | 0 | 1.39 | 0.39 | 0 |
| 1.54 | 0.08 | 1 | 0.96 | 0.32 | 0 |
| 1.96 | 0.42 | 0 | 1    | 0.27 | 0 |
| 1.38 | 0.12 | 0 | 0.96 | 0.14 | 0 |
| n/a  | n/a  | 0 | n/a  | n/a  | 0 |
| 0.7  | 0.06 | 1 | 1.12 | 0.24 | 0 |
| 1.23 | 0.31 | 0 | 1.12 | 0.22 | 0 |
| 1.86 | 0.15 | 0 | 0.92 | 0.46 | 0 |
| 1.77 | 0.23 | 0 | 0.83 | 0.16 | 0 |
| 1.89 | 0.71 | 0 | 0.74 | 0.23 | 0 |
| 1.14 | 0.07 | 1 | 1.29 | 0.39 | 0 |
|      |      | 0 | 1.16 | 0.37 | 0 |
| 0.9  | 0.54 | 0 | 0.85 | 0.08 | 0 |
| 1.62 | 6    | 0 | 0.88 | 0.15 | 0 |
| 1.32 | 0.21 | 0 | 1.02 | 0.24 | 0 |
| 1.74 | 0.32 | 0 | 1.05 | 0.28 | 0 |
| 1.38 | 0.06 | 0 | 0.95 | 0.12 | 0 |
| 1.65 | 0.24 | 0 | 1.09 | 0.5  | 0 |
| 1.3  | 0.22 | 0 | 1.19 | 0.17 | 0 |
| 1.68 | 0.98 | 0 | 0.88 | 0.28 | 0 |

|     |      |      |       |      |      |   |
|-----|------|------|-------|------|------|---|
|     | 1.55 | 0.28 | 0     | 1.02 | 0.57 | 0 |
|     | 1.69 | 0.41 | 0     | 1.05 | 0.48 | 0 |
|     | 1.27 | 0.27 | 0     | 1.05 | 0.23 | 0 |
|     | 1.68 | 0.39 | 0     | 1.11 | 0.29 | 0 |
|     | 1.53 | 0.25 | 0     | 1.01 | 0.13 | 0 |
|     | 1.52 | 0.13 | 0     | 1.27 | 0.22 | 0 |
| n/a | n/a  |      | 0 n/a | n/a  |      | 0 |
|     | 0.18 | 0.03 | 1     | 1.09 | 0.32 | 1 |
|     | 1.87 | 0.27 | 0     | 0.75 | 0.25 | 0 |
|     | 1.38 | 0.22 | 0     | 1.09 | 0.27 | 0 |
|     | 1.79 | 0.15 | 0     | 0.97 | 0.26 | 0 |
|     | 1.59 | 0.07 | 0     | 1.05 | 0.28 | 0 |
| n/a | n/a  |      | 0 n/a | n/a  |      | 0 |
| n/a | n/a  |      | 0 n/a | n/a  |      | 0 |
|     | 1.72 | 0.45 | 0     | 1.06 | 0.22 | 0 |
| n/a | n/a  |      | 0 n/a | n/a  |      | 0 |
|     | 1.29 | 0.2  | 0     | 0.87 | 0.54 | 0 |
|     | 1.74 | 0.34 | 0     | 1.19 | 0.3  | 0 |
| n/a | n/a  |      | 0 n/a | n/a  |      | 0 |
| n/a | n/a  |      | 0 n/a | n/a  |      | 0 |
| n/a | n/a  |      | 0 n/a | n/a  |      | 0 |
|     | 1.25 | 0.3  | 0     | 1.13 | 0.25 | 0 |
|     | 1.17 | 0.21 | 0     | 1.2  | 0.19 | 0 |
|     | 1.43 | 0.11 | 0     | 1.16 | 0.32 | 0 |
| n/a | n/a  |      | 0 n/a | n/a  |      | 0 |
|     | 1.65 | 0.36 | 0     | 0.87 | 0.19 | 0 |
|     |      |      | 0     | 0.78 | 0.18 | 0 |
| n/a | n/a  |      | 0 n/a | n/a  |      | 0 |
|     | 1.05 | 0.32 | 0     | 0.77 | 0.31 | 0 |
|     | 0.94 | 0.17 | 1     | 1.12 | 0.34 | 0 |
|     | 1.01 | 0.09 | 1     | 1.02 | 0.18 | 0 |
|     | 1.01 | 0.44 | 1     | 0.91 | 0.25 | 0 |
| n/a | n/a  |      | 0 n/a | n/a  |      | 0 |
|     | 1.78 | 0.24 | 0     | 1.04 | 0.16 | 0 |
|     | 0.63 | 0.07 | 1     | 1.03 | 0.36 | 0 |
|     | 1.4  | 0.77 | 0     | 0.93 | 0.24 | 0 |
|     | 1.83 | 0.11 | 0     | 1.11 | 0.58 | 0 |
|     |      |      | 1     | 1.13 | 0.49 | 0 |
|     | 1.55 | 0.25 | 0     | 1.05 | 0.32 | 0 |
|     | 1.53 | 0.22 | 1     | 1    | 0.1  | 0 |
|     | 1.62 | 0.62 | 0     | 0.98 | 0.12 | 0 |
|     | 1.93 | 0.22 | 1     | 0.9  | 0.44 | 0 |
|     | 2.34 | 0.38 | 0     | 0.98 | 0.17 | 0 |
|     | 1.82 | 1.44 | 0     | 0.91 | 0.14 | 0 |
|     | 0.83 | 0.13 | 1     | 0.93 | 0.85 | 0 |
|     | 1.62 | 0.17 | 0     | 0.73 | 3.02 | 0 |
| n/a | n/a  |      | 0 n/a | n/a  |      | 0 |
| n/a | n/a  |      | 0 n/a | n/a  |      | 0 |
|     | 2.13 | 0.41 | 0     | 1.12 | 0.13 | 0 |
|     | 1.67 | 0.35 | 0     | 1.01 | 0.65 | 0 |
| n/a | n/a  |      | 0 n/a | n/a  |      | 0 |
|     | 1.3  | 1.33 | 0     | 0.92 | 0.14 | 0 |

|     |      |      |       |      |      |   |
|-----|------|------|-------|------|------|---|
|     | 1.12 | 0.35 | 0     | 1.11 | 0.45 | 0 |
|     | 0.9  | 0.29 | 0     | 0.91 | 0.29 | 0 |
|     | 1.54 | 0.26 | 0     | 0.89 | 0.38 | 0 |
|     | 1.53 | 0.05 | 0     | 1.06 | 0.37 | 0 |
|     | 1.82 | 0.26 | 0     | 0.97 | 4.63 | 0 |
|     |      |      | 0     | 0.95 | 0.43 | 0 |
|     | 1.08 | 0.11 | 0     | 0.98 | 0.81 | 0 |
|     | 0.69 | 0.05 | 1     | 0.92 | 1.28 | 0 |
| n/a | n/a  |      | 0 n/a | n/a  |      | 0 |
|     | 1.48 | 0.23 | 0     | 1.16 | 0.36 | 0 |
|     | 1.12 | 0.24 | 1     | 0.93 | 0.21 | 0 |
|     | 1.71 | 0.31 | 0     | 0.84 | 0.47 | 0 |
|     | 1.47 | 0.12 | 1     | 0.98 | 0.31 | 0 |
|     | 1.82 | 0.1  | 1     | 1    | 0.34 | 0 |
|     | 0.17 | 0.07 | 1     | 1.28 | 0.53 | 1 |
|     | 2.11 | 0.29 | 0     | 1.22 | 0.3  | 0 |
|     | 0.67 | 0.2  | 1     | 0.92 | 0.36 | 0 |
|     |      |      | 0     | 1.03 | 0.33 | 0 |
|     | 2.33 | 0.27 | 1     | 1.15 | 0.66 | 0 |
| n/a | n/a  |      | 0 n/a | n/a  |      | 0 |
|     | 0.71 | 0.21 | 1     | 1.07 | 0.18 | 0 |
|     | 1.98 | 0.25 | 0     | 0.88 | 0.15 | 0 |
|     | 1.79 | 0.48 | 0     | 1.04 | 0.1  | 0 |
|     | 1.14 | 0.41 | 0     | 1.09 | 0.25 | 0 |
| n/a | n/a  |      | 0 n/a | n/a  |      | 0 |
|     | 1.6  | 0.09 | 0     | 0.94 | 0.27 | 0 |
|     | 1.08 | 0.26 | 1     | 0.97 | 2.28 | 0 |
|     | 1.56 | 0.18 | 0     | 1.14 | 0.31 | 0 |
| n/a | n/a  |      | 0 n/a | n/a  |      | 0 |
|     | 1.73 | 0.31 | 0     | 1.06 | 0.21 | 0 |
|     | 2.14 | 0.08 | 1     | 0.98 | 0.37 | 0 |
| n/a | n/a  |      | 0 n/a | n/a  |      | 0 |
| n/a | n/a  |      | 0 n/a | n/a  |      | 0 |
|     | 1.45 | 0.41 | 0     | 1.14 | 0.37 | 0 |
| n/a | n/a  |      | 0 n/a | n/a  |      | 0 |
|     | 2.76 | 0.86 | 0     | 0.88 | 0.18 | 0 |
|     | 1.53 | 0.72 | 0     | 0.96 | 0.26 | 0 |
|     | 1.43 | 0.32 | 1     | 1.17 | 0.17 | 0 |
|     | 1.85 | 0.26 | 0     | 0.91 | 0.22 | 0 |
|     | 1.38 | 0.36 | 0     | 0.87 | 0.24 | 0 |
|     | 0.35 | 0.14 | 1     | 0.75 | 0.13 | 0 |
|     | 1.56 | 0.21 | 1     | 1.29 | 0.33 | 0 |
|     |      |      | 1     | 4.57 | 1.7  | 1 |
|     | 1.46 | 0.1  | 0     | 0.94 | 0.31 | 0 |
|     | 1.69 | 0.38 | 0     | 1.02 | 0.32 | 0 |
|     | 1.32 | 0.21 | 0     | 0.88 | 0.45 | 0 |
|     |      |      | 0     | 0.97 | 0.38 | 0 |
|     | 1.96 | 0.23 | 1     | 1.06 | 0.33 | 0 |
|     | 1.05 | 0.32 | 0     | 0.79 | 0.28 | 0 |
|     | 0.75 | 0.11 | 1     | 0.93 | 0.24 | 0 |
|     | 1.32 | 0.2  | 0     | 1.03 | 0.57 | 0 |
|     | 1.4  | 0.41 | 0     | 0.84 | 0.18 | 0 |

|      |      |   |      |      |   |
|------|------|---|------|------|---|
| 1.99 | 0.73 | 0 | 0.99 | 0.59 | 0 |
| 1.89 | 0.32 | 0 | 0.8  | 0.31 | 0 |
| 0.58 | 0.07 | 1 | 1.11 | 0.21 | 0 |
| 1.28 | 0.23 | 1 | 0.98 | 0.26 | 0 |
| 1.66 | 9.51 | 0 | 0.76 | 0.19 | 0 |
| 1.7  | 0.27 | 0 | 0.92 | 0.18 | 0 |
| 1.27 | 0.63 | 0 | 0.94 | 0.18 | 0 |
| 1.41 | 0.33 | 0 | 0.88 | 0.22 | 0 |
| 1.27 | 0.06 | 1 | 1.06 | 0.19 | 0 |
| 0.13 | 0.03 | 1 | 0.86 | 0.24 | 1 |
| 0.13 | 0.04 | 1 | 0.83 | 0.18 | 1 |
| 1.54 | 0.46 | 0 | 0.92 | 0.13 | 0 |
| 1.42 | 0.1  | 1 | 1.07 | 0.37 | 0 |
| 1.67 | 0.28 | 1 | 1.53 | 0.93 | 0 |
| 1.49 | 0.18 | 1 | 1.01 | 0.44 | 0 |
| 1.03 | 0    | 1 | 1.25 | 0.63 | 0 |
| 0.83 | 0.18 | 1 | 1.23 | 0.2  | 0 |
| 0.1  | 0.03 | 1 | 0.99 | 0.27 | 1 |
| 0.65 | 0.07 | 1 | 1.26 | 0.35 | 0 |
| 0.85 | 0.12 | 1 | 1.46 | 0.63 | 0 |
| 0.37 | 0.14 | 1 | 1.17 | 0.28 | 0 |
| 0.93 | 0.49 | 1 | 0.99 | 0.25 | 0 |
| 0.3  | 0.05 | 1 | 0.97 | 0.31 | 0 |
| 1.38 | 0.33 | 0 | 0.87 | 0.03 | 0 |
|      |      | 1 | 1.35 | 0.43 | 0 |
| 0.88 | 0.1  | 1 | 0.98 | 0.17 | 0 |
| 0.35 | 0.18 | 1 | 0.9  | 0.26 | 1 |
| 0.84 | 0.06 | 1 | 1.01 | 0.24 | 0 |
| 1.66 | 0.08 | 0 | 0.94 | 0.08 | 0 |
| 1.53 | 0.2  | 0 | 0.88 | 0.44 | 0 |
| 1.15 | 0.39 | 0 | 1.14 | 0.53 | 0 |
| 0.48 | 0.01 | 1 | 1.12 | 0.24 | 0 |
| 0.81 | 0.1  | 1 | 1.16 | 0.22 | 0 |
| 1.62 | 0.06 | 0 | 0.95 | 0.37 | 0 |
| 0.95 | 0.32 | 1 | 0.96 | 0.44 | 0 |
| 1.16 | 0.33 | 0 | 1.08 | 0.34 | 0 |
|      |      | 0 | 0.75 | 0.24 | 0 |
| 1.53 | 0.25 | 0 | 1.21 | 0.42 | 0 |
| 1.63 | 0.37 | 0 | 1.02 | 0.32 | 0 |
| 1.22 | 0.27 | 0 | 0.91 | 0.34 | 0 |
|      |      | 0 | 0.93 | 0.19 | 0 |
| n/a  | n/a  | 0 | n/a  | n/a  | 0 |
| 1.32 | 0.15 | 0 | 0.93 | 0.1  | 0 |
| 0.65 | 0.08 | 1 | 0.75 | 0.28 | 0 |
| n/a  | n/a  | 0 | n/a  | n/a  | 0 |
| 2.09 | 0.43 | 0 | 0.84 | 0.12 | 0 |
| 1.12 | 0.15 | 1 | 0.79 | 0.21 | 0 |
| 1.73 | 0.19 | 0 | 1.13 | 0.32 | 0 |
| 1.5  | 0.15 | 0 | 1.14 | 0.38 | 0 |
| 1.49 | 0.28 | 1 | 1.75 | 0.71 | 0 |
| 1.33 | 0.16 | 1 | 1.26 | 0.39 | 0 |
| 0.87 | 0.13 | 1 | 1.09 | 0.23 | 0 |

|     |      |      |       |      |      |   |
|-----|------|------|-------|------|------|---|
|     | 1.39 | 0.28 | 1     | 0.88 | 0.19 | 0 |
|     | 2.32 | 0.1  | 1     | 1.16 | 0.17 | 0 |
|     | 1.35 | 0.21 | 0     | 0.97 | 0.32 | 0 |
|     | 1.65 | 0.42 | 0     | 0.83 | 0.28 | 0 |
|     | 1.42 | 0.11 | 0     | 0.79 | 1.04 | 0 |
| n/a | n/a  |      | 0 n/a | n/a  |      | 0 |
|     | 1.64 | 0.25 | 0     | 0.85 | 0.73 | 0 |
|     |      |      | 0     | 0.96 | 0.14 | 0 |
|     | 0.85 | 0.07 | 1     | 1.19 | 0.51 | 0 |
| n/a | n/a  |      | 0 n/a | n/a  |      | 0 |
| n/a | n/a  |      | 0 n/a | n/a  |      | 0 |
|     | 1.99 | 0.25 | 0     | 1.03 | 0.17 | 0 |
|     | 1.62 | 0.38 | 0     | 1.06 | 0.39 | 0 |
|     | 1.25 | 0.15 | 0     | 0.82 | 0.31 | 0 |
|     | 1.09 | 0.05 | 1     | 1.23 | 0.27 | 0 |
|     | 1.58 | 0.37 | 1     | 1.08 | 0.29 | 0 |
|     | 2.37 | 0.45 | 1     | 1.92 | 0.34 | 0 |
|     | 0.27 | 0.03 | 1     | 1.07 | 0.15 | 0 |
|     | 0.32 | 0.05 | 1     | 1.11 | 0.16 | 0 |
|     | 1.02 | 0.03 | 1     | 1.52 | 0.5  | 0 |
|     | 0.5  | 0.05 | 1     | 0.99 | 1.7  | 0 |
|     |      |      | 0     | 1.16 | 0.37 | 0 |
|     | 0.55 | 0.03 | 1     | 0.87 | 0.32 | 0 |
|     | 1.39 | 0.35 | 0     | 0.93 | 0.21 | 0 |
|     | 1.17 | 0.26 | 0     | 0.99 | 0.51 | 0 |
|     | 1.93 | 0.19 | 0     | 1.04 | 0.39 | 0 |
|     | 1.2  | 0.62 | 0     | 0.82 | 0.21 | 0 |
|     | 1.67 | 0.5  | 0     | 1.06 | 0.21 | 0 |
|     | 1.4  | 0.13 | 0     | 1    | 0.35 | 0 |
| n/a | n/a  |      | 0 n/a | n/a  |      | 0 |
|     | 1.03 | 0.28 | 0     | 0.95 | 0.23 | 0 |
|     | 0.68 | 0.06 | 1     | 1.04 | 0.34 | 0 |
|     | 2.16 | 0.2  | 0     | 0.77 | 0.16 | 0 |
|     | 1.3  | 0.43 | 0     | 0.86 | 0.19 | 0 |
|     | 1.65 | 0.4  | 0     | 0.91 | 0.2  | 0 |
|     | 0.09 | 0.04 | 1     | 0.98 | 0.45 | 1 |
|     | 1.41 | 0.14 | 1     | 0.9  | 0.17 | 0 |
|     | 0.08 | 0.01 | 1     | 0.96 | 0.28 | 1 |
|     | 1.59 | 0.33 | 1     | 1.41 | 0.27 | 0 |
|     | 1.43 | 0.29 | 1     | 1.07 | 0.24 | 0 |
|     | 1.87 | 0.43 | 0     | 0.95 | 0.14 | 0 |
|     | 1.48 | 0.11 | 1     | 1.02 | 0.14 | 0 |
|     | 2.11 | 0.56 | 0     | 1.09 | 0.18 | 0 |
|     | 0.81 | 0.46 | 0     | 0.82 | 0.22 | 0 |
|     | 1.48 | 0.25 | 0     | 1.02 | 0.15 | 0 |
|     | 1.15 | 0.28 | 1     | 0.98 | 0.12 | 0 |
|     | 1.27 | 0.18 | 0     | 1.08 | 0.26 | 0 |
|     | 0.84 | 0.32 | 1     | 0.91 | 0.36 | 0 |
|     | 0.56 | 0.06 | 1     | 0.96 | 0.33 | 0 |
|     | 0.44 | 0.07 | 1     | 0.89 | 0.22 | 0 |
|     | 1.7  | 0.47 | 0     | 0.82 | 0.06 | 0 |
|     | 0.32 | 0.04 | 1     | 0.96 | 0.39 | 1 |

|     |      |      |   |      |      |   |
|-----|------|------|---|------|------|---|
|     | 1.16 | 0.38 | 0 | 1.34 | 0.34 | 0 |
|     | 1.37 | 0.25 | 0 | 0.97 | 0.28 | 0 |
|     | 1.96 | 0.21 | 0 | 0.97 | 0.18 | 0 |
|     | 1.48 | 0.11 | 0 | 0.81 | 0.25 | 0 |
|     | 1.06 | 0.46 | 0 | 0.88 | 0.26 | 0 |
|     | 1.55 | 0.24 | 0 | 0.88 | 0.28 | 0 |
| n/a | n/a  |      | 0 | n/a  | n/a  | 0 |
| n/a | n/a  |      | 0 | n/a  | n/a  | 0 |
|     | 2.05 | 0.3  | 1 | 1.48 | 0.49 | 0 |
|     | 2.11 | 0.25 | 0 | 0.78 | 0.28 | 0 |
| n/a | n/a  |      | 0 | n/a  | n/a  | 0 |
|     | 1.42 | 0.16 | 0 | 0.88 | 0.36 | 0 |
| n/a | n/a  |      | 0 | n/a  | n/a  | 0 |
|     | 1.74 | 0.17 | 1 | 1.23 | 0.18 | 0 |
|     |      |      | 0 | 0.93 | 0.26 | 0 |
| n/a | n/a  |      | 0 | n/a  | n/a  | 0 |
| n/a | n/a  |      | 0 | n/a  | n/a  | 0 |
|     | 1.87 | 0.09 | 0 | 2.6  | 0.99 | 0 |
|     | 0.35 | 0.04 | 1 | 1.95 | 0.48 | 1 |
|     | 1.4  | 0.22 | 1 | 1.28 | 0.3  | 0 |
|     | 1.37 | 0.42 | 0 | 1.04 | 0.29 | 0 |
|     | 1.64 | 0.15 | 0 | 1.01 | 0.17 | 0 |
|     | 1.39 | 0.27 | 0 | 0.87 | 0.22 | 0 |
|     | 2.06 | 0.41 | 1 | 1.04 | 0.28 | 0 |
|     | 1.66 | 0.34 | 0 | 0.92 | 0.2  | 0 |
|     | 1.73 | 0.34 | 0 | 0.97 | 0.26 | 0 |
|     | 1.65 | 0.19 | 1 | 1.31 | 0.27 | 0 |
|     | 1.32 | 0.15 | 1 | 1.37 | 0.4  | 0 |
|     | 1.57 | 0.33 | 0 | 0.75 | 0.25 | 0 |
|     | 1.68 | 0.43 | 0 | 0.85 | 0.35 | 0 |
| n/a | n/a  |      | 0 | n/a  | n/a  | 0 |
|     | 0.85 | 0.04 | 1 | 1.09 | 0.26 | 0 |
|     | 0.49 | 0.07 | 1 | 0.94 | 0.17 | 0 |
|     | 1.44 | 0.23 | 0 | 0.99 | 0.34 | 0 |
|     | 0.88 | 0.1  | 1 | 0.92 | 0.29 | 0 |
|     | 1.41 | 0.03 | 1 | 1.09 | 0.2  | 0 |
| n/a | n/a  |      | 0 | n/a  | n/a  | 0 |
| n/a | n/a  |      | 0 | n/a  | n/a  | 0 |
| n/a | n/a  |      | 0 | n/a  | n/a  | 0 |
|     | 1.94 | 0.37 | 0 | 1.02 | 0.22 | 0 |
|     | 1.69 | 0.11 | 0 | 1.09 | 0.31 | 0 |
|     | 1.94 | 0.3  | 0 | n/a  | n/a  | 0 |
| n/a | n/a  |      | 0 | n/a  | n/a  | 0 |
| n/a | n/a  |      | 0 | n/a  | n/a  | 0 |
| n/a | n/a  |      | 0 | n/a  | n/a  | 0 |
| n/a | n/a  |      | 0 | n/a  | n/a  | 0 |
|     | 0.47 | 0.06 | 1 | 0.98 | 0.25 | 0 |
|     | 1.39 | 0.09 | 1 | 1.06 | 0.19 | 0 |
|     | 1.51 | 0.37 | 0 | 0.79 | 0.24 | 0 |
|     | 1.73 | 0.17 | 0 | 1.36 | 0.4  | 0 |
|     |      |      | 1 | 1.02 | 0.23 | 0 |
|     | 1.17 | 0.17 | 1 | 0.92 | 0.22 | 0 |



|      |       |   |      |      |   |
|------|-------|---|------|------|---|
| 1.43 | 0.03  | 0 | 0.93 | 0.15 | 0 |
| 1.61 | 0.68  | 0 | 0.93 | 0.24 | 0 |
| 1.69 | 0.84  | 0 | 0.81 | 0.34 | 0 |
| 2.11 | 0.12  | 0 | 0.92 | 0.23 | 0 |
| 1.68 | 0.4   | 0 | 0.77 | 0.26 | 0 |
| 1.3  | 0.11  | 0 | 1.05 | 0.23 | 0 |
| 1.33 | 0.72  | 0 | 0.9  | 0.38 | 0 |
| 1.19 | 0.15  | 0 | 0.97 | 0.17 | 0 |
| 1.58 | 0.31  | 0 | 0.95 | 0.21 | 0 |
| 1.57 | 0.15  | 0 | 0.93 | 0.27 | 0 |
| 1.96 | 0.31  | 0 | 1.1  | 0.23 | 0 |
| 1.34 | 0.42  | 0 | 0.93 | 0.27 | 0 |
| 1.24 | 0.3   | 0 | 1.01 | 0.18 | 0 |
| 2.65 | 0.81  | 0 | 0.94 | 0.23 | 0 |
| 1.81 | 0.34  | 0 | 0.9  | 0.17 | 0 |
| 1.93 | 0.51  | 0 | 1.04 | 0.47 | 0 |
| 1.49 | 0.18  | 0 | 0.91 | 0.26 | 0 |
| 1.59 | 0.27  | 0 | 1.02 | 0.25 | 0 |
| 1.91 | 0.92  | 0 | 1.03 | 0.17 | 0 |
| 1.27 | 0.27  | 0 | 1.06 | 0.26 | 0 |
| 1.08 | 0.25  | 0 | 1.21 | 0.26 | 0 |
| 2.22 | 0.58  | 0 | 0.89 | 1.63 | 0 |
| 0.91 | 0.16  | 1 | 1.03 | 0.27 | 0 |
| 1.88 | 19.82 | 0 | 1.04 | 0.16 | 0 |
| 1.65 | 0.09  | 1 | 1.13 | 0.21 | 0 |
| 0.39 | 0.09  | 1 | 0.81 | 0.44 | 1 |
| 1.1  | 0.38  | 0 | 0.92 | 0.32 | 0 |
| 1.72 | 0.53  | 0 | 0.86 | 0.25 | 0 |
| 1.6  | 0.22  | 0 | 0.91 | 0.17 | 0 |
| 2.14 | 0.5   | 0 | 0.86 | 0.32 | 0 |
| 1.33 | 0.34  | 1 | 0.9  | 0.14 | 0 |
| 1.25 | 0.14  | 1 | 1.09 | 0.15 | 0 |
| 1.6  | 0.23  | 0 | 0.9  | 0.27 | 0 |
| 0.99 | 0.03  | 0 | 1.1  | 0.24 | 0 |
| 1.15 | 0.26  | 0 | 0.84 | 0.41 | 0 |
| 0.41 | 0.08  | 1 | 1.2  | 0.59 | 0 |
| 1.59 | 0.19  | 0 | 0.87 | 0.27 | 0 |
|      |       | 0 | 0.9  | 0.33 | 0 |
| 1.35 | 0.28  | 0 | 0.98 | 0.32 | 0 |
| 1.13 | 0.04  | 0 | 0.93 | 0.14 | 0 |
| 0.27 | 0.04  | 1 | 0.84 | 0.52 | 0 |
| 1.99 | 0.53  | 0 | 1.01 | 0.3  | 0 |
| n/a  | n/a   | 0 | n/a  | n/a  | 0 |
| 1.99 | 0.45  | 0 | 1.12 | 0.32 | 0 |
| 1.49 | 0.27  | 1 | 1.05 | 0.39 | 0 |
| 1.5  | 0.23  | 0 | 1.06 | 0.46 | 0 |
| n/a  | n/a   | 0 | n/a  | n/a  | 0 |
| 0.67 | 0.23  | 1 | 1.19 | 0.36 | 0 |
| 1.37 | 0.28  | 0 | 1.04 | 0.34 | 0 |
| 0.72 | 0.09  | 1 | 0.82 | 0.33 | 0 |
|      |       | 0 | 0.98 | 0.28 | 0 |
| 1.13 | 0.38  | 0 | 0.82 | 0.38 | 0 |

|     |      |      |       |      |      |   |
|-----|------|------|-------|------|------|---|
|     | 1.8  | 0.23 | 0     | 1.26 | 0.98 | 0 |
|     | 1.47 | 0.18 | 1     | 1.19 | 0.37 | 0 |
|     | 2.37 | 1.2  | 0     | 1.05 | 0.3  | 0 |
|     | 1.08 | 0.33 | 0     | 0.74 | 0.1  | 0 |
|     | 1.45 | 0.99 | 0     | 1.12 | 0.34 | 0 |
|     | 1.85 | 0.2  | 1     | 0.97 | 0.17 | 0 |
|     | 1.28 | 5.16 | 0     | 0.93 | 0.11 | 0 |
|     | 1.66 | 0.18 | 0 n/a | n/a  |      | 0 |
|     | 1.4  | 0.17 | 0     | 1.08 | 0.34 | 0 |
|     | 1.32 | 0.35 | 1     | 1.04 | 0.29 | 0 |
| n/a | n/a  |      | 0 n/a | n/a  |      | 0 |
|     | 2.05 | 0.17 | 0     | 0.89 | 0.22 | 0 |
|     | 1.48 | 0.04 | 1     | 1.2  | 0.19 | 0 |
|     | 1.83 | 0.14 | 0     | 0.94 | 0.19 | 0 |
| n/a | n/a  |      | 0 n/a | n/a  |      | 0 |
|     | 1.46 | 0.44 | 0     | 1.04 | 0.49 | 0 |
|     | 1.28 | 0.05 | 0     | 0.97 | 0.31 | 0 |
|     | 0.77 | 0.14 | 0     | 1.03 | 0.34 | 0 |
| n/a | n/a  |      | 0 n/a | n/a  |      | 0 |
|     | 1.39 | 0.19 | 1     | 2.14 | 0.93 | 0 |
| n/a | n/a  |      | 0 n/a | n/a  |      | 0 |
| n/a | n/a  |      | 0 n/a | n/a  |      | 0 |
| n/a | n/a  |      | 0 n/a | n/a  |      | 0 |
| n/a | n/a  |      | 0 n/a | n/a  |      | 0 |
|     | 1.95 | 0.36 | 0     | 1.15 | 0.17 | 0 |
|     | 1.53 | 0.25 | 0     | 1.01 | 0.25 | 0 |
|     | 0.91 | 0.08 | 0     | 1.17 | 0.5  | 0 |
|     | 1.49 | 0.04 | 0     | 1.18 | 0.26 | 0 |
| n/a | n/a  |      | 0 n/a | n/a  |      | 0 |
|     | 1.97 | 0.1  | 0     | 0.88 | 0.52 | 0 |
| n/a | n/a  |      | 0 n/a | n/a  |      | 0 |
|     | 1.46 | 0.25 | 1     | 0.94 | 0.23 | 0 |
|     | 1.31 | 0.22 | 0     | 0.95 | 0.21 | 0 |
|     | 1.16 | 0.09 | 0     | 0.82 | 0.16 | 0 |
|     | 0.84 | 0.18 | 1     | 0.93 | 0.78 | 0 |
| n/a | n/a  |      | 0 n/a | n/a  |      | 0 |
|     | 0.82 | 0.09 | 1     | 1.14 | 0.38 | 0 |
| n/a | n/a  |      | 0 n/a | n/a  |      | 0 |
|     | 0.77 | 0.1  | 1     | 0.9  | 0.77 | 0 |
|     | 1.58 | 0.61 | 0     | 0.95 | 4.34 | 0 |
| n/a | n/a  |      | 0 n/a | n/a  |      | 0 |
|     | 1.64 | 0.29 | 0     | 0.98 | 0.13 | 0 |
|     | 1.53 | 0.25 | 0     | 1.02 | 0.39 | 0 |
|     | 1.43 | 1.43 | 0     | 1.21 | 0.37 | 0 |
|     | 1.09 | 0.06 | 0     | 1.1  | 0.28 | 0 |
|     | 1.57 | 0.39 | 1     | 0.95 | 0.16 | 0 |
|     | 0.54 | 0.17 | 1     | 0.86 | 0.15 | 0 |
|     | 2.14 | 0.62 | 0     | 1    | 0.45 | 0 |
|     | 1.49 | 0.11 | 0     | 1.11 | 0.26 | 0 |
|     | 1.46 | 0.29 | 0     | 0.96 | 0.21 | 0 |
|     | 0.07 | 0.02 | 1     | 0.81 | 0.09 | 1 |
|     | 1.32 | 0.06 | 0     | 0.93 | 0.17 | 0 |

|     |       |      |   |      |      |   |
|-----|-------|------|---|------|------|---|
|     | 1.74  | 0.09 | 0 | 1.03 | 0.41 | 0 |
|     | 1.34  | 0.41 | 0 | 0.85 | 0.17 | 0 |
|     | 0.58  | 0.13 | 1 | 0.87 | 0.11 | 0 |
|     | 2.01  | 0.27 | 0 | 0.87 | 0.27 | 0 |
|     | 1.51  | 0.16 | 0 | 0.91 | 0.36 | 0 |
| n/a | n/a   |      | 0 | n/a  | n/a  | 0 |
| n/a | n/a   |      | 0 | n/a  | n/a  | 0 |
|     |       |      | 0 | 0.86 | 0.41 | 0 |
|     | 1.86  | 0.37 | 0 | 1.11 | 0.31 | 0 |
|     | 1.57  | 0.09 | 0 | 0.94 | 0.46 | 0 |
| n/a | n/a   |      | 0 | n/a  | n/a  | 0 |
|     | 1.38  | 0.4  | 0 | 0.94 | 0.23 | 0 |
|     | 0.2   | 0.01 | 1 | 0.86 | 0.2  | 1 |
|     | 1.44  | 0.05 | 1 | 0.82 | 0.15 | 0 |
|     | 1.67  | 0.37 | 1 | 1.45 | 0.48 | 0 |
|     | 1.34  | 0.75 | 0 | 1.04 | 0.27 | 0 |
|     | 0.97  | 0.22 | 1 | 0.97 | 0.34 | 0 |
|     |       |      | 1 | 0.89 | 0.17 | 1 |
|     | 0.67  | 0.12 | 1 | 0.78 | 0.24 | 0 |
|     |       |      | 1 | 1    | 0.17 | 0 |
| n/a | n/a   |      | 0 | n/a  | n/a  | 0 |
|     | 0.71  | 0.1  | 1 | 1.01 | 0.24 | 0 |
|     | 1.8   | 0.21 | 0 | 1.06 | 0.32 | 0 |
|     | 1.3   | 0.24 | 0 | 0.98 | 0.46 | 0 |
|     | 0.93  | 0.01 | 1 | 1.55 | 0.51 | 0 |
|     | 1.21  | 0.35 | 1 | 0.73 | 0.49 | 0 |
|     | 1.61  | 0.18 | 0 | 0.81 | 0.23 | 0 |
|     | 0.68  | 0.09 | 1 | 1.23 | 0.48 | 0 |
|     | 0.67  | 0.1  | 1 | 1.09 | 0.32 | 0 |
|     |       |      | 1 | 1.16 | 0.39 | 0 |
|     | 0.98  | 0    | 0 | 1.33 | 0.6  | 0 |
|     | 12.78 | 4.38 | 1 | 1.99 | 1.32 | 0 |
|     | 1.47  | 0.28 | 0 | 1.05 | 0.26 | 0 |
|     | 1.53  | 0.29 | 0 | 0.95 | 0.17 | 0 |
|     | 1.2   | 0.07 | 0 | 0.74 | 0.25 | 0 |
|     | 1.61  | 0.22 | 0 | 0.88 | 0.16 | 0 |
|     | 1.67  | 0.27 | 0 | 0.98 | 0.34 | 0 |
|     | 1.88  | 0.28 | 0 | 0.8  | 0.15 | 0 |
|     | 1.63  | 0.44 | 0 | 0.82 | 0.11 | 0 |
|     | 2.27  | 0.75 | 0 | 1    | 0.35 | 0 |
|     | 1.82  | 0.7  | 0 | 1.02 | 0.41 | 0 |
|     | 1.92  | 0.35 | 1 | 1    | 0.28 | 0 |
|     | 1.54  | 0.26 | 0 | 1.16 | 0.41 | 0 |
|     | 0.69  | 0.16 | 1 | 1.03 | 0.37 | 0 |
|     |       |      | 1 | 0.99 | 0.31 | 0 |
| n/a | n/a   |      | 0 | n/a  | n/a  | 0 |
|     | 1.6   | 0.18 | 0 | 1.22 | 2.73 | 0 |
|     | 0.63  | 0.04 | 1 | 1.3  | 0.47 | 0 |
|     | 1.03  | 0.32 | 0 | 0.88 | 0.32 | 0 |
|     | 1.76  | 0.37 | 0 | 0.95 | 0.56 | 0 |
|     | 0.41  | 0.14 | 1 | 0.86 | 0.32 | 0 |
|     | 0.44  | 0.16 | 1 | 1    | 0.37 | 0 |

|      |      |       |      |      |   |
|------|------|-------|------|------|---|
| 1.37 | 0.14 | 0     | 1.06 | 0.32 | 0 |
| 1.62 | 0.41 | 0     | 1.01 | 0.43 | 0 |
| 1.58 | 0.36 | 0     | 0.88 | 0.39 | 0 |
| 0.31 | 0.06 | 1     | 0.79 | 0.1  | 1 |
| 1.11 | 0.18 | 0     | 1.12 | 0.35 | 0 |
| 1.63 | 0.19 | 0     | 1.17 | 0.25 | 0 |
| 1.01 | 0.16 | 1     | 0.94 | 0.47 | 0 |
| 1.81 | 0.29 | 0     | 0.87 | 0.19 | 0 |
| 1.02 | 0.15 | 1     | 1.08 | 0.28 | 0 |
| 3.72 | 0.71 | 1     | 1.09 | 0.22 | 0 |
| 1.24 | 0.24 | 0     | 0.96 | 0.26 | 0 |
| 2.23 | 0.43 | 1     | 1.35 | 0.39 | 0 |
| 1.68 | 0.61 | 0     | 1.09 | 0.15 | 0 |
| 1.59 | 0.29 | 0     | 0.79 | 0.28 | 0 |
| 0.99 | 0.07 | 0     | 1.03 | 0.32 | 0 |
| 1.88 | 0.19 | 0     | 1.02 | 0.34 | 0 |
| 1.07 | 0.16 | 1     | 0.91 | 0.32 | 0 |
| 1.39 | 0.19 | 1     | 0.94 | 0.19 | 0 |
| 1.03 | 0.22 | 1     | 0.99 | 0.24 | 0 |
| 2.01 | 0.36 | 0     | 1.12 | 0.32 | 0 |
| 1.88 | 0.22 | 0     | 1.03 | 0.44 | 0 |
| 1.78 | 1.18 | 0     | 0.75 | 0.26 | 0 |
| 1.73 | 0.27 | 0     | 0.99 | 0.23 | 0 |
| 1.72 | 0.37 | 0     | 0.94 | 0.27 | 0 |
| 1.3  | 0.25 | 0     | 0.89 | 0.28 | 0 |
| 1.64 | 0.5  | 0     | 0.88 | 0.15 | 0 |
| 0.73 | 0.11 | 1     | 1.04 | 0.12 | 0 |
| 1.72 | 0.73 | 0     | 0.82 | 0.38 | 0 |
| 1.96 | 0.09 | 0     | 1.01 | 0.32 | 0 |
| 1.32 | 0.61 | 0 n/a | n/a  |      | 0 |
| 1.02 | 0.22 | 1     | 1.07 | 0.21 | 0 |
| 0.99 | 0.11 | 1     | 0.84 | 0.24 | 0 |
| 1.08 | 0.18 | 0     | 1.23 | 0.26 | 0 |
| 1.42 | 0.18 | 0     | 0.87 | 0.39 | 0 |
| 0.76 | 0.13 | 1     | 0.78 | 0.17 | 0 |
| 1.45 | 0.17 | 0     | 1    | 0.21 | 0 |
| 1.62 | 0.17 | 0     | 0.85 | 0.38 | 0 |
| 1.97 | 0.27 | 0     | 0.82 | 0.17 | 0 |
| 2.89 | 0.37 | 1     | 1.13 | 0.55 | 0 |
| 1.53 | 0.25 | 0     | 1.02 | 0.21 | 0 |
| 1.58 | 0.39 | 0     | 0.84 | 0.22 | 0 |
| 1.06 | 0.14 | 1     | 1.37 | 0.2  | 0 |
| 1.79 | 0.3  | 0     | 1.44 | 0.69 | 0 |
| 1.06 | 0.42 | 0     | 0.82 | 0.45 | 0 |
| 1.14 | 0.08 | 1     | 0.98 | 0.47 | 0 |
| 0.64 | 0.12 | 1     | 1.14 | 0.28 | 0 |
| 0.92 | 0.1  | 1     | 0.87 | 0.47 | 0 |
| 1.71 | 0.31 | 0     | 0.97 | 0.25 | 0 |
| 1.34 | 0.12 | 0     | 1    | 0.21 | 0 |
| 0.24 | 0.08 | 1     | 0.97 | 0.31 | 0 |
| 1.79 | 0.38 | 1     | 0.89 | 0.28 | 0 |
| n/a  | n/a  | 0 n/a | n/a  |      | 0 |

|     |      |      |       |      |      |   |
|-----|------|------|-------|------|------|---|
|     | 1.35 | 0.18 | 0     | 1.39 | 1.05 | 0 |
|     | 1.89 | 0.31 | 0     | 0.84 | 0.22 | 0 |
|     | 2.12 | 0.51 | 0     | 1.1  | 0.51 | 0 |
|     | 1.48 | 0.4  | 0     | 1.01 | 0.26 | 0 |
|     | 1.37 | 0.22 | 1     | 9.12 | 2.54 | 1 |
| n/a | n/a  |      | 0 n/a | n/a  |      | 0 |
|     | 1.04 | 0.16 | 1     | 0.78 | 0.23 | 0 |
|     | 1.62 | 0.05 | 0 n/a | n/a  |      | 0 |
|     | 1.27 | 0.55 | 0     | 0.95 | 0.16 | 0 |
|     | 1.24 | 0.23 | 0     | 1.25 | 0.29 | 0 |
|     | 1.87 | 0.3  | 0     | 1.02 | 0.27 | 0 |
|     |      |      | 1     | 0.9  | 0.12 | 0 |
|     |      |      | 0     | 1.09 | 0.5  | 0 |
|     |      |      | 0     | 0.9  | 0.16 | 0 |
|     | 0.79 | 0.07 | 1     | 0.71 | 0.29 | 0 |
|     | 1.54 | 0.89 | 0     | 0.79 | 0.25 | 0 |
|     | 1.82 | 0.44 | 0     | 1.28 | 0.36 | 0 |
|     |      |      | 0     | 1.12 | 0.18 | 0 |
|     | 1.23 | 0.1  | 0     | 0.97 | 0.17 | 0 |
|     | 1.75 | 0.37 | 1     | 1.31 | 0.37 | 0 |
|     | 1.37 | 0.15 | 0     | 1.02 | 0.57 | 0 |
|     | 1.73 | 0.59 | 0     | 0.95 | 0.65 | 0 |
|     | 1.32 | 0.28 | 0     | 1.08 | 0.4  | 0 |
|     | 0.11 | 0.04 | 1     | 1.11 | 0.26 | 1 |
|     | 1.55 | 0.41 | 1     | 1.04 | 0.6  | 0 |
|     | 1.18 | 0.36 | 0     | 0.85 | 0.29 | 0 |
|     | 1.65 | 0.07 | 0     | 1.07 | 0.23 | 0 |
|     | 1.62 | 0.16 | 0     | 0.94 | 0.21 | 0 |
|     | 0.93 | 0.32 | 0     | 0.98 | 0.17 | 0 |
| n/a | n/a  |      | 0 n/a | n/a  |      | 0 |
| n/a | n/a  |      | 0 n/a | n/a  |      | 0 |
|     |      |      | 0     | 0.77 | 0.66 | 0 |
|     | 1.04 | 0.32 | 0     | 0.88 | 0.57 | 0 |
|     | 1.2  | 0.16 | 0     | 1.4  | 0.59 | 0 |
|     | 0.78 | 0.32 | 1     | 0.87 | 0.2  | 0 |
|     | 1.43 | 0.22 | 0     | 0.98 | 0.25 | 0 |
|     | 1.16 | 0.1  | 0     | 0.84 | 0.44 | 0 |
|     | 1    | 0.23 | 0     | 1.17 | 0.37 | 0 |
|     | 0.87 | 0.37 | 1     | 1    | 0.3  | 0 |
|     | 1.32 | 0.95 | 0     | 0.93 | 0.22 | 0 |
|     | 0.74 | 0.03 | 1     | 0.88 | 0.2  | 0 |
|     |      |      | 1     | 1.04 | 0.25 | 0 |
|     |      |      | 0     | 1.05 | 0.31 | 0 |
|     | 1.29 | 0.29 | 0     | 0.96 | 0.25 | 0 |
|     | 1.55 | 0.19 | 1     | 1.14 | 0.39 | 0 |
|     | 0.68 | 0.11 | 1     | 1.49 | 0.4  | 1 |
|     | 0.22 | 0.05 | 1     | 0.89 | 0.14 | 1 |
|     | 1.22 | 0.33 | 1     | 1.18 | 0.36 | 1 |
|     | 1.08 | 0.16 | 1     | 1.35 | 0.24 | 0 |
|     | 1.33 | 0.13 | 1     | 0.94 | 0.28 | 0 |
|     | 2.32 | 0.39 | 0     | 1.03 | 0.19 | 0 |
|     |      |      | 1     | 1.02 | 0.19 | 0 |

|     |      |      |       |      |      |   |
|-----|------|------|-------|------|------|---|
|     | 1.37 | 0.11 | 1     | 1.43 | 0.32 | 0 |
|     | 1.42 | 0.14 | 1     | 1.03 | 0.06 | 0 |
|     | 1.16 | 0.21 | 0     | 0.92 | 0.35 | 0 |
|     | 2.02 | 0.44 | 0     | 1.12 | 0.28 | 0 |
|     | 2.36 | 0.65 | 0     | 1.11 | 0.28 | 0 |
|     | 0.43 | 0.11 | 1     | 0.78 | 0.05 | 1 |
|     | 1.67 | 0.21 | 0     | 0.8  | 0.36 | 0 |
| n/a | n/a  |      | 0 n/a | n/a  |      | 0 |
|     | 1.82 | 0.45 | 1     | 0.77 | 0.24 | 0 |
|     | 1.65 | 0.39 | 0     | 0.92 | 0.19 | 0 |
| n/a | n/a  |      | 0 n/a | n/a  |      | 0 |
|     | 1.51 | 0.24 | 0     | 0.89 | 0.21 | 0 |
|     | 2.03 | 0.32 | 0     | 1.19 | 0.16 | 0 |
|     | 0.58 | 0.05 | 1     | 0.87 | 0.2  | 0 |
|     | 1.61 | 0.15 | 0     | 1.03 | 0.26 | 0 |
|     | 0.45 | 0.14 | 1     | 1.45 | 0.24 | 1 |
|     | 1.4  | 0.11 | 0     | 1.01 | 0.22 | 0 |
| n/a | n/a  |      | 0 n/a | n/a  |      | 0 |
|     | 1.52 | 0.11 | 0     | 0.99 | 0.14 | 0 |
|     | 0.76 | 0.17 | 1     | 0.94 | 0.36 | 0 |
|     | 1.78 | 0.41 | 0     | 0.89 | 0.19 | 0 |
|     | 2.63 | 5.61 | 1     | 1.04 | 0.24 | 0 |
|     | 1.35 | 0.55 | 0     | 1.12 | 0.49 | 0 |
|     | 1.75 | 0.31 | 1     | 0.91 | 2.17 | 0 |
|     | 1.91 | 0.51 | 0     | 0.96 | 0.18 | 0 |
|     | 2.23 | 0.42 | 0     | 1.09 | 0.12 | 0 |
|     | 1.12 | 0.17 | 0     | 0.88 | 0.23 | 0 |
|     | 2.16 | 0.08 | 0     | 1.07 | 0.44 | 0 |
|     | 1.75 | 0.26 | 0     | 0.9  | 0.32 | 0 |
|     | 1.6  | 0.16 | 0     | 0.93 | 0.2  | 0 |
|     | 1.61 | 0.57 | 0     | 0.97 | 0.25 | 0 |
|     | 1.39 | 0.18 | 0     | 0.99 | 0.42 | 0 |
|     | 1.23 | 0.05 | 1     | 0.98 | 0.39 | 0 |
|     | 1.43 | 0.3  | 0     | 1    | 0.24 | 0 |
|     | 0.86 | 0.16 | 1     | 0.98 | 0.08 | 0 |
|     | 1.44 | 0.18 | 0     | 0.78 | 0.28 | 0 |
|     | 2.07 | 0.35 | 0     | 1.07 | 0.21 | 0 |
| n/a | n/a  |      | 0 n/a | n/a  |      | 0 |
|     | 1.91 | 0.46 | 0     | 0.84 | 0.25 | 0 |
| n/a | n/a  |      | 0 n/a | n/a  |      | 0 |
| n/a | n/a  |      | 0 n/a | n/a  |      | 0 |
|     | 0.86 | 0.18 | 0 n/a | n/a  |      | 0 |
|     | 2    | 0.67 | 0 n/a | n/a  |      | 0 |
|     | 1.34 | 0.46 | 0 n/a | n/a  |      | 0 |
|     | 1.05 | 0.41 | 0     | 1.03 | 0.36 | 0 |
| n/a | n/a  |      | 0 n/a | n/a  |      | 0 |
|     | 0.99 | 0.25 | 1     | 1.05 | 0.29 | 0 |
|     | 1.44 | 0.76 | 0     | 1.11 | 0.24 | 0 |
| n/a | n/a  |      | 0 n/a | n/a  |      | 0 |
| n/a | n/a  |      | 0 n/a | n/a  |      | 0 |
| n/a | n/a  |      | 0 n/a | n/a  |      | 0 |
| n/a | n/a  |      | 0 n/a | n/a  |      | 0 |

|     |      |      |     |      |      |   |
|-----|------|------|-----|------|------|---|
| n/a | n/a  | 0    | n/a | n/a  | 0    |   |
| n/a | n/a  | 0    | n/a | n/a  | 0    |   |
| n/a | n/a  | 0    | n/a | n/a  | 0    |   |
| n/a | n/a  | 0    | n/a | n/a  | 0    |   |
| n/a | n/a  | 0    | n/a | n/a  | 0    |   |
|     | 0.17 | 0.04 | 1   | 0.68 | 0.49 | 1 |
|     | 1.54 | 0.16 | 0   | 1.01 | 0.3  | 0 |
|     | 1.18 | 0.08 | 1   | 1.23 | 0.2  | 0 |
|     | 1.5  | 0.08 | 0   | 1.13 | 0.24 | 0 |
|     | 1.56 | 1.14 | 0   | 1.08 | 0.23 | 0 |
| n/a | n/a  | 0    | n/a | n/a  | 0    |   |
|     | 1.87 | 0.21 | 0   | 1.09 | 0.4  | 0 |
|     | 1.71 | 0.41 | 0   | 1.08 | 0.19 | 0 |
|     | 1.51 | 0.12 | 0   | 0.96 | 0.25 | 0 |
|     | 1.33 | 0.2  | 1   | 1.66 | 0.4  | 0 |
|     | 1.74 | 0.24 | 0   | 0.9  | 0.14 | 0 |
|     | 2.15 | 0.62 | 0   | 1.11 | 0.24 | 0 |
|     | 1.55 | 0.2  | 0   | 1.13 | 0.32 | 0 |
|     | 1.89 | 0.34 | 0   | 1.09 | 0.19 | 0 |
|     | 1.69 | 0.24 | 0   | 1.09 | 0.15 | 0 |
|     | 0.71 | 0.16 | 1   | 1.28 | 0.31 | 0 |
|     | 1.51 | 0.5  | 0   | 1.17 | 0.35 | 0 |
|     | 1.89 | 1.23 | 0   | 0.97 | 0.18 | 0 |
|     | 1.88 | 0.24 | 0   | 0.99 | 0.28 | 0 |
|     | 1.8  | 0.19 | 0   | 0.93 | 0.2  | 0 |
|     | 1.86 | 0.19 | 0   | 1.19 | 0.3  | 0 |
|     | 1.5  | 0.2  | 0   | 1.3  | 0.2  | 0 |
|     | 1.36 | 0.38 | 0   | 1.02 | 0.18 | 0 |
|     | 1.46 | 0.02 | 1   | 1.06 | 0.3  | 0 |
|     | 1.51 | 0.28 | 0   | 1.11 | 0.27 | 0 |
|     | 1.03 | 0.31 | 0   | 1.02 | 0.36 | 0 |
|     | 0.78 | 0.06 | 1   | 1.2  | 0.28 | 0 |
|     | 2.55 | 0.22 | 0   | 1.12 | 0.58 | 0 |
|     | 1.25 | 0.14 | 0   | 1.16 | 0.38 | 0 |
|     | 1.57 | 0.19 | 1   | 3.52 | 1.22 | 0 |
|     | 2.46 | 0.77 | 0   | 0.91 | 0.12 | 0 |
|     | 0.66 | 0.23 | 1   | 4.64 | 4.4  | 1 |
|     | 2.16 | 0.18 | 0   | 0.84 | 0.13 | 0 |
|     | 1.87 | 0.19 | 0   | 1.34 | 0.29 | 0 |
|     | 1.49 | 0.14 | 0   | 1.01 | 0.36 | 0 |
|     | 1.71 | 0.13 | 0   | 1.1  | 0.28 | 0 |
|     | 2.44 | 0.45 | 0   | 1    | 0.13 | 0 |
|     | 1.91 | 0.27 | 0   | 1    | 0.25 | 0 |
|     | 1.3  | 0.3  | 0   | 5.23 | 1.82 | 0 |
|     |      |      | 0   | 0.99 | 0.41 | 0 |
|     | 2.36 | 0.45 | 0   | 0.99 | 0.23 | 0 |
|     | 1.23 | 0.23 | 0   | 0.84 | 0.31 | 0 |
|     | 1.17 | 0.1  | 0   | 0.91 | 0.23 | 0 |
|     | 0.84 | 0.26 | 0   | 1.18 | 0.26 | 0 |
|     | 0.29 | 0.07 | 1   | 1.07 | 0.26 | 1 |
|     | 1.54 | 0.12 | 1   | 1.11 | 0.32 | 0 |
|     | 1.25 | 0.26 | 0   | 0.85 | 0.21 | 0 |

|     |      |      |     |      |      |   |
|-----|------|------|-----|------|------|---|
| n/a | n/a  | 0    | n/a | n/a  | 0    |   |
|     | 0.47 | 0.13 | 1   | 1.38 | 0.53 | 0 |
|     | 0.54 | 0.16 | 1   | 1.17 | 0.22 | 0 |
|     |      |      | 1   | 0.89 | 0.13 | 0 |
| n/a | n/a  | 0    | n/a | n/a  | 0    |   |
|     | 2.75 | 0.21 | 1   | 1.38 | 0.69 | 0 |
|     | 1.3  | 0.76 | 0   | 0.94 | 0.52 | 0 |
|     | 1.4  | 0.21 | 0   | 1.01 | 0.32 | 0 |
| n/a | n/a  | 0    | n/a | n/a  | 0    |   |
|     | 1.28 | 0.07 | 0   | 1    | 0.17 | 0 |
|     | 1.13 | 0.07 | 0   | 0.94 | 4.69 | 0 |
|     | 1.6  | 0.19 | 0   | 0.81 | 0.15 | 0 |
|     | 0.88 | 0.09 | 1   | 0.88 | 0.17 | 0 |
|     |      |      | 0   | 0.98 | 0.24 | 0 |
|     | 0.52 | 0.07 | 1   | 0.93 | 0.82 | 0 |
|     | 1.38 | 0.1  | 0   | 1.18 | 0.53 | 0 |
|     | 1.35 | 0.23 | 0   | 0.82 | 0.22 | 0 |
|     | 1.4  | 0.3  | 0   | 1.07 | 0.19 | 0 |
|     | 0.63 | 0.13 | 1   | 1.01 | 0.55 | 0 |
|     | 1.12 | 0.16 | 0   | 1    | 0.27 | 0 |
|     | 1.31 | 0.11 | 0   | 0.8  | 0.61 | 0 |
|     | 1.51 | 1.16 | 0   | 0.85 | 0.25 | 0 |
|     | 0.97 | 0.49 | 0   | 0.98 | 1.86 | 0 |
|     | 0.53 | 0.08 | 1   | 0.92 | 0.18 | 0 |
|     | 1.22 | 0.12 | 0   | 1.12 | 0.32 | 0 |
|     | 1.58 | 0.26 | 0   | 0.91 | 0.32 | 0 |
|     | 1.88 | 0.08 | 0   | 1.12 | 0.34 | 0 |
|     | 1.09 | 0.14 | 0   | 1.01 | 0.17 | 0 |
|     | 1.09 | 0.12 | 0   | 1.01 | 0.43 | 0 |
|     | 1.3  | 0.21 | 0   | 0.99 | 0.38 | 0 |
| n/a | n/a  | 0    | n/a | n/a  | 0    |   |
|     | 1.38 | 1.13 | 0   | 0.99 | 0.17 | 0 |
|     | 1.3  | 0.14 | 1   | 0.86 | 0.25 | 0 |
| n/a | n/a  | 0    | n/a | n/a  | 0    |   |
|     | 1.54 | 0.37 | 0   | 1.05 | 0.51 | 0 |
| n/a | n/a  | 0    | n/a | n/a  | 0    |   |
|     | 0.49 | 0.04 | 1   | 1.17 | 0.3  | 0 |
|     | 1.12 | 0.26 | 1   | 0.94 | 0.22 | 0 |
|     | 1.47 | 0.03 | 0   | 0.69 | 0.44 | 0 |
|     | 1.78 | 0.39 | 0   | 0.82 | 0.49 | 0 |
|     | 1.4  | 0.45 | 0   | 1.11 | 0.36 | 0 |
| n/a | n/a  | 0    | n/a | n/a  | 0    |   |
|     | 1.36 | 0.05 | 1   | 1.07 | 0.13 | 1 |
| n/a | n/a  | 0    | n/a | n/a  | 0    |   |
|     | 0.82 | 0.06 | 1   | 1.09 | 0.29 | 0 |
|     | 1.77 | 0.22 | 1   | 1.46 | 0.62 | 0 |
| n/a | n/a  | 0    | n/a | n/a  | 0    |   |
|     |      |      | 1   | 0.87 | 0.22 | 0 |
| n/a | n/a  | 0    | n/a | n/a  | 0    |   |
|     | 1.26 | 0.05 | 0   | 1.04 | 0.39 | 0 |
| n/a | n/a  | 0    | n/a | n/a  | 0    |   |
|     |      |      | 0   | 0.8  | 0.08 | 0 |



|     |      |      |       |      |      |   |
|-----|------|------|-------|------|------|---|
|     | 1.09 | 0.15 | 1     | 1.29 | 0.32 | 0 |
|     | 1.64 | 0.24 | 0     | 1.02 | 0.27 | 0 |
|     | 1.59 | 0.82 | 0     | 1    | 0.29 | 0 |
|     | 1.14 | 0.08 | 1     | 1.12 | 0.22 | 0 |
|     | 1.43 | 0.09 | 1     | 0.83 | 0.17 | 0 |
|     | 0.87 | 0.17 | 1     | 0.91 | 0.48 | 0 |
|     | 1.22 | 0.18 | 0     | 1.26 | 0.22 | 0 |
|     | 1.78 | 0.28 | 0     | 0.83 | 0.25 | 0 |
|     | 1.07 | 0.28 | 1     | 1.13 | 0.25 | 0 |
|     | 1.12 | 0.19 | 0     | 0.82 | 0.15 | 0 |
|     | 1.37 | 0.27 | 0     | 0.96 | 0.21 | 0 |
|     | 1.11 | 0.22 | 0     | 0.96 | 0.38 | 0 |
|     | 1.27 | 0.08 | 0     | 0.99 | 0.22 | 0 |
|     | 1.17 | 0.17 | 0     | 1.01 | 0.4  | 0 |
|     | 0.85 | 0.18 | 1     | 0.95 | 0.55 | 0 |
|     | 1.42 | 0.32 | 0     | 1.01 | 0.37 | 0 |
|     | 1.56 | 0.19 | 0     | 1    | 0.27 | 0 |
| n/a | n/a  |      | 0 n/a | n/a  |      | 0 |
|     | 1.55 | 0.15 | 0     | 0.95 | 0.21 | 0 |
| n/a | n/a  |      | 0 n/a | n/a  |      | 0 |
|     | 1.46 | 0.03 | 0     | 1.2  | 0.31 | 0 |
|     | 0.44 | 0.09 | 1     | 1.04 | 0.17 | 0 |
|     | 1.75 | 0.19 | 0     | 0.9  | 0.71 | 0 |
| n/a | n/a  |      | 0 n/a | n/a  |      | 0 |
|     | 1.25 | 0.29 | 0     | 1.04 | 0.23 | 0 |
| n/a | n/a  |      | 0 n/a | n/a  |      | 0 |
|     | 1.94 | 0.3  | 1     | 1.15 | 0.3  | 0 |
|     | 1.94 | 0.07 | 1     | 1.39 | 0.51 | 0 |
|     | 1.39 | 0.2  | 0     | 0.97 | 0.27 | 0 |
|     |      |      | 0     | 1.18 | 0.36 | 0 |
|     | 1.2  | 0.06 | 0     | 1    | 0.44 | 0 |
|     | 0.6  | 0.09 | 1     | 0.96 | 0.17 | 0 |
|     | 1.6  | 0.12 | 0     | 0.85 | 0.35 | 0 |
|     | 3.67 | 1.13 | 1     | 1.23 | 0.35 | 0 |
|     | 1.47 | 0.12 | 0     | 0.9  | 0.21 | 0 |
|     | 1.36 | 0.13 | 0     | 1.3  | 0.37 | 0 |
|     | 1.18 | 0.36 | 0     | 1.18 | 0.27 | 0 |
|     | 1.95 | 0.34 | 0     | 1.14 | 0.18 | 0 |
|     | 0.87 | 0.1  | 1     | 0.69 | 0.25 | 0 |
|     | 2.2  | 1.23 | 1     | 4.47 | 3.25 | 0 |
|     | 1.03 | 0.09 | 1     | 1.26 | 0.61 | 0 |
|     | 1.36 | 0.15 | 0     | 0.88 | 0.88 | 0 |
|     | 0.47 | 0.05 | 1     | 1.02 | 0.1  | 0 |
|     | 0.8  | 0.15 | 0     | 1.04 | 0.22 | 0 |
|     | 1.04 | 0.4  | 0     | 0.87 | 0.27 | 0 |
|     | 1.75 | 0.18 | 0     | 0.89 | 0.25 | 0 |
|     | 1.45 | 0.14 | 0     | 0.91 | 0.36 | 0 |
|     | 1.59 | 0.33 | 0     | 1.15 | 0.54 | 0 |
|     | 0.37 | 0.04 | 1     | 1.06 | 0.38 | 0 |
|     | 0.72 | 0.05 | 1     | 1.59 | 0.26 | 0 |
|     | 1.34 | 0.14 | 0     | 0.92 | 0.2  | 0 |
|     | 1.28 | 0.21 | 0     | 0.9  | 0.24 | 0 |

|     |      |      |       |      |      |   |
|-----|------|------|-------|------|------|---|
|     | 1.4  | 0.28 | 0     | 1.09 | 0.39 | 0 |
|     | 1.48 | 0.17 | 0     | 0.99 | 0.31 | 0 |
|     | 2.32 | 0.44 | 0     | 1.53 | 0.91 | 0 |
| n/a | n/a  |      | 0 n/a | n/a  |      | 0 |
|     | 1.62 | 0.1  | 0     | 1.32 | 0.97 | 0 |
| n/a | n/a  |      | 0 n/a | n/a  |      | 0 |
|     | 1.32 | 0.17 | 0     | 0.77 | 0.22 | 0 |
|     | 1.52 | 0.13 | 0     | 1.04 | 0.2  | 0 |
|     | 1.16 | 0.15 | 1     | 0.99 | 0.24 | 0 |
|     | 1.62 | 0.47 | 0     | 1.08 | 0.59 | 0 |
|     | 1.25 | 0.28 | 0     | 1.04 | 0.51 | 0 |
|     | 1.43 | 0.17 | 0     | 0.93 | 0.22 | 0 |
|     | 1.3  | 0.41 | 0     | 0.94 | 0.3  | 0 |
|     | 1.02 | 0.36 | 1     | 0.84 | 0.22 | 0 |
|     | 0.94 | 0.05 | 1     | 0.97 | 0.24 | 0 |
|     | 0.95 | 0.33 | 0     | 0.86 | 0.28 | 0 |
|     | 1.49 | 0.12 | 0     | 0.91 | 0.31 | 0 |
|     | 1.19 | 0.43 | 0     | 0.88 | 0.48 | 0 |
|     | 0.89 | 2.94 | 0     | 0.99 | 0.18 | 0 |
|     | 1.66 | 0.42 | 0     | 1.09 | 0.42 | 0 |
|     | 0.22 | 0.05 | 1     | 0.56 | 0.07 | 1 |
|     | 0.63 | 0.12 | 0     | 0.9  | 0.08 | 0 |
|     | 0.92 | 0.09 | 1     | 1.36 | 0.69 | 0 |
|     | 1.21 | 0.22 | 0     | 1.09 | 0.3  | 0 |
|     | 1.33 | 0.2  | 0     | 1.04 | 0.37 | 0 |
|     | 0.09 | 0.02 | 1     | 0.78 | 0.09 | 1 |
|     | 0.5  | 0.11 | 1     | 0.97 | 0.3  | 0 |
|     | 1.43 | 0.23 | 0     | 1.16 | 0.34 | 0 |
|     | 1.03 | 0.45 | 1     | 1.72 | 0.42 | 0 |
|     | 1.54 | 0.15 | 1     | 1.23 | 0.23 | 0 |
|     | 0.7  | 0.1  | 1     | 0.82 | 0.34 | 1 |
|     | 0.57 | 0    | 1     | 1.35 | 0.41 | 0 |
|     | 1.1  | 0.11 | 0     | 0.96 | 0.23 | 0 |
|     | 0.17 | 0.03 | 1     | 0.97 | 0.16 | 0 |
|     | 1.26 | 0.03 | 0     | 0.88 | 0.19 | 0 |
|     | 0.48 | 0.02 | 1     | 1.08 | 0.5  | 0 |
|     | 1.49 | 0.25 | 0     | 0.94 | 0.35 | 0 |
|     | 0.35 | 0.07 | 1     | 1.08 | 0.19 | 0 |
|     | 1.59 | 0.36 | 0     | 1.15 | 0.27 | 0 |
|     | 1.36 | 0.48 | 0     | 1.02 | 0.27 | 0 |
|     | 1.39 | 0.27 | 0     | 1.04 | 0.37 | 0 |
| n/a | n/a  |      | 0 n/a | n/a  |      | 0 |
|     |      |      | 0     | 0.92 | 0.3  | 0 |
|     | 0.49 | 0.02 | 1     | 0.98 | 0.2  | 0 |
|     | 0.12 | 0.02 | 1     | 1.08 | 0.12 | 1 |
|     | 0.73 | 0.15 | 1     | 0.91 | 0.37 | 0 |
|     | 1.37 | 0.3  | 0     | 1.14 | 1.31 | 0 |
|     | 1.14 | 0.22 | 0     | 0.98 | 0.32 | 0 |
|     |      |      | 0     | 0.97 | 0.28 | 0 |
|     | 0.93 | 0.19 | 1     | 0.98 | 0.57 | 0 |
|     |      |      | 1     | 1.76 | 0.67 | 0 |
|     | 1.02 | 0.37 | 0     | 0.83 | 0.44 | 0 |

|      |      |   |      |      |   |
|------|------|---|------|------|---|
| 0.49 | 0.11 | 1 | 0.68 | 0.12 | 0 |
| 0.58 | 0.1  | 1 | 0.9  | 0.18 | 0 |
| 0.29 | 0.08 | 1 | 1.15 | 0.2  | 1 |
| 1.39 | 0.28 | 0 | 1.25 | 0.49 | 0 |
| 0.19 | 0.09 | 1 | 1.06 | 0.4  | 0 |
| 2.09 | 0.56 | 0 | 0.96 | 0.15 | 0 |
| 1.02 | 0.09 | 0 | 0.87 | 0.47 | 0 |
| 6.06 | 1.02 | 1 | 2.86 | 0.14 | 1 |
| 0.93 | 0.13 | 1 | 1.16 | 0.43 | 0 |
| 1.55 | 0.19 | 0 | 1.02 | 0.38 | 0 |
| 1.76 | 0.33 | 0 | 0.89 | 0.59 | 0 |
| 1.57 | 0.22 | 0 | 0.92 | 0.15 | 0 |
| 1.42 | 0.63 | 0 | 1.17 | 0.25 | 0 |
| 1.63 | 0.07 | 0 | 1.07 | 0.13 | 0 |
| 1.01 | 0.31 | 0 | 0.84 | 0.38 | 0 |
|      |      | 1 | 0.96 | 0.22 | 0 |
| 1.11 | 0.04 | 0 | 0.75 | 0.31 | 0 |
| 0.82 | 0.21 | 1 | 1.62 | 0.28 | 0 |
| 0.71 | 0.15 | 1 | 1.19 | 0.26 | 0 |
| 1.23 | 0.09 | 0 | 0.99 | 0.18 | 0 |
| 1.75 | 0.45 | 1 | 1.22 | 0.37 | 0 |
| 1.34 | 0.16 | 0 | 1.1  | 0.68 | 0 |
| n/a  | n/a  | 0 | n/a  | n/a  | 0 |
|      |      | 0 | 1.22 | 0.41 | 0 |
|      |      | 0 | 0.96 | 0.69 | 0 |
|      |      | 0 | 0.98 | 0.16 | 0 |
| n/a  | n/a  | 0 | n/a  | n/a  | 0 |
|      |      | 0 | 1.06 | 0.23 | 0 |
| n/a  | n/a  | 0 | n/a  | n/a  | 0 |
|      |      | 1 | 1.03 | 0.24 | 0 |
| n/a  | n/a  | 0 | n/a  | n/a  | 0 |
| n/a  | n/a  | 0 | n/a  | n/a  | 0 |
|      |      | 0 | 1.13 | 0.43 | 0 |
|      |      | 1 | 1.01 | 0.15 | 1 |
|      |      | 0 | 0.78 | 0.2  | 0 |
|      |      | 0 | 0.82 | 0.38 | 0 |
|      |      | 0 | 1.05 | 0.38 | 0 |
|      |      | 0 | 0.89 | 0.21 | 0 |
|      |      | 0 | 1.27 | 0.44 | 0 |
|      |      | 0 | 0.95 | 0.21 | 0 |
|      |      | 0 | n/a  | n/a  | 0 |
|      |      | 1 | 1.09 | 0.1  | 0 |
|      |      | 1 | 0.86 | 0.15 | 1 |
|      |      | 1 | 1.61 | 0.5  | 0 |
|      |      | 0 | 0.93 | 0.13 | 0 |
|      |      | 0 | 1.03 | 0.37 | 0 |
|      |      | 0 | 1.07 | 0.32 | 0 |
|      |      | 0 | 0.93 | 0.53 | 0 |
| n/a  | n/a  | 0 | n/a  | n/a  | 0 |
|      |      | 0 | 1.02 | 0.38 | 0 |
|      |      | 0 | 1.5  | 0.46 | 0 |
|      |      | 0 | 1.04 | 0.19 | 0 |

|     |      |      |   |      |       |   |
|-----|------|------|---|------|-------|---|
|     | 0.5  | 0.18 | 1 | 0.76 | 0.15  | 0 |
|     | 1.11 | 0.3  | 0 | 0.86 | 0.34  | 0 |
|     | 1.06 | 0.06 | 0 | 0.96 | 0.34  | 0 |
|     | 1.32 | 0.06 | 0 | 0.93 | 0.22  | 0 |
|     | 1.4  | 0.21 | 0 | 0.85 | 0.33  | 0 |
|     | 1.37 | 0.32 | 0 | 0.92 | 0.3   | 0 |
|     | 1.2  | 0.29 | 0 | 1.09 | 0.23  | 0 |
|     | 2    | 0.18 | 1 | 0.97 | 0.25  | 0 |
|     | 1.76 | 0.35 | 1 | 1.01 | 0.29  | 0 |
|     | 1.37 | 0.16 | 1 | 0.97 | 0.25  | 0 |
|     | 0.76 | 0.11 | 1 | 1.33 | 0.19  | 0 |
|     | 1.09 | 0.1  | 0 | 1.01 | 0.33  | 0 |
|     | 2.09 | 0.6  | 0 | 1.05 | 0.71  | 0 |
|     | 0.93 | 0.04 | 1 | 1.28 | 0.45  | 0 |
|     | 0.54 | 0.09 | 1 | 0.9  | 0.11  | 0 |
|     | 0.72 | 0.11 | 1 | 0.72 | 0.28  | 0 |
|     | 1.26 | 0.02 | 0 | 1.24 | 0.62  | 0 |
|     | 1.08 | 0.13 | 1 | 1.21 | 0.16  | 0 |
|     |      |      | 0 | 1.04 | 0.47  | 0 |
|     | 1.24 | 0.16 | 1 | 1.16 | 0.25  | 0 |
|     | 0.89 | 0.11 | 1 | 0.89 | 0.1   | 0 |
|     | 1.17 | 0.28 | 0 | 1.12 | 0.23  | 0 |
|     | 0.79 | 0.36 | 1 | 1.1  | 0.2   | 0 |
|     | 1.33 | 0.18 | 0 | 0.99 | 0.29  | 0 |
|     | 1.85 | 0.15 | 0 | 1.1  | 0.25  | 0 |
|     | 0.59 | 0.09 | 1 | 1.14 | 0.32  | 1 |
|     | 1.46 | 0.24 | 0 | 0.96 | 0.21  | 0 |
|     | 1.54 | 0.28 | 0 | 0.96 | 0.2   | 0 |
|     | 1.38 | 0.25 | 0 | 0.86 | 19.47 | 0 |
|     | 0.94 | 0.27 | 1 | 1.07 | 0.28  | 0 |
| n/a | n/a  |      | 0 | n/a  | n/a   | 0 |
| n/a | n/a  |      | 0 | n/a  | n/a   | 0 |
| n/a | n/a  |      | 0 | n/a  | n/a   | 0 |
|     |      |      | 0 | 0.97 | 0.22  | 0 |
| n/a | n/a  |      | 0 | n/a  | n/a   | 0 |
|     |      |      | 1 | 0.98 | 0.16  | 0 |
|     | 1.39 | 0.29 | 1 | 0.89 | 0.11  | 0 |
|     | 1.26 | 0.11 | 0 | 1.13 | 0.3   | 0 |
|     | 0.58 | 0.05 | 1 | 1.02 | 0.22  | 0 |
|     | 1.46 | 0.25 | 0 | 0.88 | 5.84  | 0 |
|     | 1.76 | 0.45 | 0 | 1.17 | 0.35  | 0 |
|     | 1.84 | 0.71 | 0 | 1.18 | 0.41  | 0 |
|     | 0.26 | 0.03 | 1 | 1.47 | 0.09  | 1 |
|     | 0.6  | 0.22 | 1 | 0.89 | 0.18  | 0 |
|     | 1.7  | 0.18 | 0 | 0.93 | 0.07  | 0 |
|     | 0.55 | 0.08 | 1 | 1.14 | 0.09  | 0 |
|     | 1.67 | 0.58 | 0 | 1.05 | 0.37  | 0 |
|     | 1.96 | 0.17 | 0 | 0.92 | 0.28  | 0 |
|     | 1.56 | 0.18 | 1 | 1.93 | 0.44  | 0 |
|     | 1.42 | 0.12 | 0 | 1.09 | 0.19  | 0 |
|     | 1.47 | 0.2  | 0 | 0.92 | 0.32  | 0 |
| n/a | n/a  |      | 0 | n/a  | n/a   | 0 |

|     |      |      |       |      |      |   |
|-----|------|------|-------|------|------|---|
|     | 1.46 | 0.37 | 0     | 0.96 | 0.35 | 0 |
|     | 1.93 | 0.3  | 0     | 0.82 | 0.38 | 0 |
|     | 1.1  | 0.22 | 1     | 0.93 | 0.14 | 0 |
|     | 1.34 | 0.25 | 0     | 0.94 | 0.23 | 0 |
|     |      |      | 0     | 0.99 | 0.16 | 0 |
|     | 1.28 | 0.26 | 1     | 1.06 | 0.52 | 0 |
|     | 1.41 | 0.34 | 0     | 0.92 | 0.34 | 0 |
|     | 0.66 | 0.1  | 1     | 1.16 | 0.29 | 0 |
| n/a | n/a  |      | 0 n/a | n/a  |      | 0 |
| n/a | n/a  |      | 0 n/a | n/a  |      | 0 |
| n/a | n/a  |      | 0 n/a | n/a  |      | 0 |
| n/a | n/a  |      | 0 n/a | n/a  |      | 0 |
| n/a | n/a  |      | 0 n/a | n/a  |      | 0 |
| n/a | n/a  |      | 0 n/a | n/a  |      | 0 |
| n/a | n/a  |      | 0 n/a | n/a  |      | 0 |
| n/a | n/a  |      | 0 n/a | n/a  |      | 0 |
| n/a | n/a  |      | 0 n/a | n/a  |      | 0 |
|     | 0.55 | 0.09 | 1     | 0.8  | 0.07 | 0 |
|     | 1.25 | 0.2  | 1     | 1.21 | 0.19 | 0 |
|     | 1.74 | 0.18 | 0 n/a | n/a  |      | 0 |
|     | 1.17 | 0.05 | 0     | 0.97 | 0.75 | 0 |
|     | 1.49 | 0.08 | 0     | 4.9  | 1.68 | 0 |
|     |      |      | 0     | 0.86 | 0.28 | 0 |
|     | 1.36 | 0.23 | 1     | 1.09 | 0.15 | 0 |
|     | 1.08 | 0.23 | 0     | 0.89 | 0.4  | 0 |
|     | 1.02 | 0.33 | 0     | 0.93 | 0.18 | 0 |
|     | 1.37 | 0.21 | 0     | 0.88 | 0.3  | 0 |
|     | 1.59 | 0.23 | 1     | 0.79 | 0.19 | 0 |
|     | 1.61 | 0.2  | 0     | 1.05 | 0.14 | 0 |
|     | 1.4  | 0.14 | 0     | 1.01 | 0.22 | 0 |
|     | 1.09 | 0.24 | 0     | 1.04 | 0.13 | 0 |
|     |      |      | 0     | 1.34 | 0.3  | 0 |
|     | 1.16 | 0.18 | 0     | 0.9  | 0.38 | 0 |
|     | 2.1  | 0.5  | 0     | 0.77 | 0.3  | 0 |
|     | 1.35 | 0.3  | 0     | 0.91 | 0.33 | 0 |
|     | 1.23 | 0.28 | 0     | 1.06 | 0.28 | 0 |
|     | 0.49 | 0.08 | 1     | 1.08 | 0.25 | 0 |
|     | 1.13 | 0.35 | 0     | 1.03 | 0.18 | 0 |
|     | 1.25 | 0.16 | 0     | 1.12 | 0.31 | 0 |
|     |      |      | 0     | 0.79 | 0.3  | 0 |
|     | 1.82 | 0.11 | 0     | 0.92 | 0.25 | 0 |
|     | 1.41 | 0.59 | 0     | 1.06 | 0.27 | 0 |
|     | 1.41 | 0.19 | 0     | 0.97 | 0.61 | 0 |
|     | 1.84 | 0.14 | 0     | 0.93 | 0.12 | 0 |
|     | 2.28 | 0.41 | 0     | 0.92 | 0.34 | 0 |
|     | 1.49 | 0.73 | 0     | 0.88 | 0.17 | 0 |
|     | 1.57 | 0.23 | 0     | 0.92 | 0.18 | 0 |
|     | 1.84 | 0.32 | 0     | 0.89 | 0.2  | 0 |
|     | 1.49 | 0.22 | 1     | 4.27 | 1.31 | 0 |
|     | 0.94 | 0.65 | 0     | 0.86 | 0.24 | 0 |
|     | 1.25 | 0.41 | 0     | 1    | 0.33 | 0 |
|     | 0.51 | 0.14 | 1     | 1.17 | 0.26 | 1 |

|     |      |      |       |      |      |   |
|-----|------|------|-------|------|------|---|
|     | 1.74 | 0.14 | 0     | 0.96 | 0.32 | 0 |
|     | 2.06 | 0.86 | 0     | 0.76 | 0.23 | 0 |
|     | 0.98 | 0.12 | 0     | 0.88 | 0.26 | 0 |
|     | 1.04 | 0.19 | 0     | 0.95 | 0.18 | 0 |
|     | 1.02 | 0.21 | 0     | 1.04 | 0.17 | 0 |
|     | 1.1  | 0.35 | 0     | 1.09 | 0.16 | 0 |
|     | 1.75 | 0.17 | 0     | 0.83 | 0.35 | 0 |
|     | 1.12 | 0.27 | 1     | 1.25 | 0.68 | 0 |
|     | 1.9  | 0.13 | 0     | 1.35 | 0.34 | 0 |
|     | 0.77 | 0.14 | 1     | 1.1  | 0.25 | 0 |
|     | 0.57 | 0.11 | 1     | 1.28 | 0.29 | 0 |
|     | 1.18 | 0.14 | 0     | 1.68 | 0.71 | 0 |
|     | 0.67 | 0.06 | 1     | 1.93 | 0.47 | 0 |
|     | 0.3  | 0.6  | 1     | 1.08 | 0.29 | 0 |
|     |      |      | 0     | 0.85 | 0.24 | 0 |
|     |      |      | 0     | 1.23 | 0.23 | 0 |
|     |      |      | 0     | 1.05 | 0.23 | 0 |
|     | 1.33 | 0.1  | 0     | 1.19 | 0.34 | 0 |
| n/a | n/a  |      | 0 n/a | n/a  |      | 0 |
|     | 1.21 | 0.71 | 0     | 0.93 | 0.37 | 0 |
|     | 0.54 | 0.04 | 1     | 0.8  | 0.52 | 0 |
| n/a | n/a  |      | 0 n/a | n/a  |      | 0 |
|     |      |      | 0     | 0.88 | 0.14 | 0 |
|     | 1.51 | 0.96 | 0     | 1.33 | 0.46 | 0 |
|     | 1.21 | 0.28 | 0     | 1.07 | 0.21 | 0 |
|     | 0.51 | 0.06 | 1     | 1.36 | 0.21 | 0 |
| n/a | n/a  |      | 0 n/a | n/a  |      | 0 |
|     | 1.34 | 0.19 | 1     | 1.12 | 0.38 | 0 |
|     | 1.92 | 0.11 | 0     | 1.25 | 0.38 | 0 |
|     | 2.3  | 1.41 | 0     | 1.11 | 0.31 | 0 |
| n/a | n/a  |      | 0 n/a | n/a  |      | 0 |
|     | 1.57 | 0.22 | 0     | 0.81 | 0.54 | 0 |
|     | 0.7  | 0.58 | 0     | 0.77 | 0.56 | 0 |
| n/a | n/a  |      | 0 n/a | n/a  |      | 0 |
| n/a | n/a  |      | 0 n/a | n/a  |      | 0 |
| n/a | n/a  |      | 0 n/a | n/a  |      | 0 |
|     | 0.11 | 0.03 | 1     | 1.18 | 0.37 | 1 |
|     | 1.01 | 0.04 | 1     | 0.97 | 0.23 | 0 |
| n/a | n/a  |      | 0 n/a | n/a  |      | 0 |
|     | 1.57 | 0.29 | 0     | 0.87 | 0.09 | 0 |
|     | 1.41 | 0.19 | 0     | 0.9  | 0.2  | 0 |
|     | 1.33 | 0.1  | 0     | 0.83 | 0.17 | 0 |
|     | 1.78 | 0.24 | 1     | 0.88 | 0.18 | 0 |
|     | 1.8  | 0.36 | 0     | 1.08 | 0.37 | 0 |
|     | 1.94 | 0.4  | 0     | 1.13 | 0.6  | 0 |
|     | 1.87 | 0.18 | 0     | 1.01 | 0.38 | 0 |
|     | 1.01 | 0.15 | 0     | 1.18 | 0.38 | 0 |
| n/a | n/a  |      | 0 n/a | n/a  |      | 0 |
|     | 1.01 | 1.84 | 0     | 1.1  | 0.31 | 0 |
|     |      |      | 0     | 0.99 | 0.24 | 0 |
|     | 1.48 | 0.14 | 0     | 0.9  | 0.23 | 0 |
|     | 1.75 | 0.17 | 0     | 0.81 | 0.18 | 0 |

|     |      |        |     |      |      |   |
|-----|------|--------|-----|------|------|---|
| n/a | n/a  | 0      | n/a | n/a  | 0    |   |
|     | 1.22 | 0.06   | 0   | 1.29 | 0.31 | 0 |
|     | 1.37 | 0.09   | 0   | 0.86 | 0.19 | 0 |
|     | 1.45 | 0.1    | 0   | 1.18 | 0.23 | 0 |
|     | 1.26 | 0.3    | 0   | 0.86 | 0.23 | 0 |
|     | 1.85 | 0.49   | 0   | 0.99 | 0.24 | 0 |
| n/a | n/a  | 0      | n/a | n/a  | 0    |   |
|     | 1.33 | 0.56   | 0   | 0.85 | 0.31 | 0 |
|     | 1.39 | 0.32   | 0   | 0.95 | 0.22 | 0 |
| n/a | n/a  | 0      | n/a | n/a  | 0    |   |
|     | 1.77 | 0.12   | 0   | 1.05 | 0.39 | 0 |
| n/a | n/a  | 0      | n/a | n/a  | 0    |   |
|     | 1.44 | 0.1    | 0   | 1.07 | 0.36 | 0 |
| n/a | n/a  | 0      | n/a | n/a  | 0    |   |
|     | 1.6  | 1.12   | 0   | 1.01 | 0.36 | 0 |
|     | 1.52 | 213.88 | 0   | 0.97 | 0.19 | 0 |
|     | 1.05 | 0.08   | 1   | 0.91 | 0.26 | 0 |
|     | 1.54 | 0.22   | 0   | 0.69 | 0.17 | 0 |
|     | 1.61 | 0.28   | 0   | 1.1  | 0.26 | 0 |
|     | 1.19 | 0.08   | 0   | 1.03 | 0.26 | 0 |
|     | 1.18 | 0.07   | 0   | 1.1  | 0.16 | 0 |
|     | 0.87 | 0.07   | 1   | 0.83 | 0.14 | 0 |
|     | 1.34 | 0.42   | 0   | 0.88 | 0.25 | 0 |
| n/a | n/a  | 0      | n/a | n/a  | 0    |   |
|     | 1.29 | 0.38   | 0   | 1.02 | 0.34 | 0 |
|     | 1.78 | 0.15   | 0   | 0.88 | 0.22 | 0 |
|     | 0.67 | 0.31   | 1   | 1.09 | 0.34 | 1 |
|     | 1.83 | 1.24   | 0   | 1.17 | 1.11 | 0 |
|     | 1.57 | 0.51   | 0   | 1.03 | 0.12 | 0 |
| n/a | n/a  | 0      | n/a | n/a  | 0    |   |
|     | 1.65 | 0.28   | 1   | 1.22 | 0.38 | 0 |
|     | 2.24 | 0.53   | 0   | 1.03 | 0.42 | 0 |
|     |      |        | 1   | 1    | 0.33 | 0 |
|     | 1.35 | 0.16   | 0   | 1    | 0.24 | 0 |
|     | 1.08 | 0.02   | 1   | 0.89 | 1.08 | 0 |
|     |      |        | 1   | 0.97 | 0.38 | 1 |
|     | 0.79 | 0.52   | 0   | 0.98 | 0.34 | 0 |
| n/a | n/a  | 0      | n/a | n/a  | 0    |   |
|     | 0.42 | 0.06   | 1   | 1.01 | 0.12 | 0 |
|     | 6.51 | 1.36   | 1   | 1.16 | 0.28 | 0 |
|     | 1.74 | 0.38   | 1   | 1.07 | 0.22 | 0 |
|     | 1.88 | 0.65   | 0   | 1.04 | 0.38 | 0 |
|     | 1.45 | 0.13   | 1   | 1.08 | 0.34 | 0 |
|     | 1.78 | 0.25   | 0   | 0.97 | 0.24 | 0 |
|     | 1.5  | 0.34   | 1   | 1.25 | 0.53 | 0 |
|     | 2.09 | 0.49   | 0   | 1.11 | 0.22 | 0 |
|     | 1.58 | 0.24   | 0   | 1.08 | 1.34 | 0 |
|     | 1.29 | 0.17   | 0   | 1.04 | 0.33 | 0 |
|     | 1.51 | 0.27   | 0   | 1.01 | 0.25 | 0 |
|     | 1.24 | 0.22   | 0   | 0.94 | 0.52 | 0 |
|     | 1.64 | 0.34   | 0   | 1    | 0.44 | 0 |
| n/a | n/a  | 0      | n/a | n/a  | 0    |   |

|      |       |       |      |      |   |
|------|-------|-------|------|------|---|
| 0.71 | 0.07  | 1     | 1.09 | 0.42 | 0 |
| 1.25 | 0.26  | 0     | 1.14 | 0.15 | 0 |
| 1.68 | 0.31  | 0     | 1.27 | 0.63 | 0 |
| 1.4  | 0.38  | 0     | 0.89 | 0.27 | 0 |
| 1.57 | 0.31  | 0     | 1.16 | 0.18 | 0 |
| 1.07 | 0.17  | 0     | 0.77 | 0.77 | 0 |
| 1.35 | 0.37  | 0     | 0.95 | 0.25 | 0 |
| 1.62 | 0.67  | 0     | 0.87 | 0.15 | 0 |
| 1.24 | 0.1   | 0     | 0.78 | 0.11 | 0 |
| 1.25 | 0.19  | 0     | 0.97 | 0.28 | 0 |
| 1.71 | 0.36  | 0     | 0.91 | 0.2  | 0 |
| 1.71 | 0.24  | 0     | 1.14 | 0.3  | 0 |
| 2.31 | 0.41  | 0     | 1.11 | 0.35 | 0 |
| 1.26 | 0.77  | 0     | 0.84 | 0.5  | 0 |
| 1.41 | 0.39  | 0     | 1.07 | 0.41 | 0 |
| 1.42 | 0.12  | 0     | 1.01 | 0.17 | 0 |
| 1.54 | 0.48  | 0     | 1.08 | 0.23 | 0 |
| 0.39 | 0.05  | 1     | 1.02 | 0.4  | 0 |
| 1.06 | 0.16  | 0     | 1.17 | 0.29 | 0 |
| 1.19 | 0.71  | 0     | 1.04 | 0.51 | 0 |
| 2.16 | 1.14  | 0     | 0.9  | 0.27 | 0 |
| 1.7  | 0.35  | 0 n/a | n/a  |      | 0 |
| 1.73 | 0.2   | 0     | 1.24 | 0.13 | 0 |
|      |       | 1     | 1.07 | 0.46 | 0 |
| 1.54 | 0.73  | 0     | 0.83 | 0.1  | 0 |
| 0.44 | 0.05  | 1     | 1.08 | 0.26 | 0 |
| 1.45 | 0.1   | 0     | 0.76 | 0.2  | 0 |
| 1.51 | 0.16  | 0     | 1.08 | 0.21 | 0 |
| 1.97 | 0.61  | 0     | 0.85 | 0.5  | 0 |
| 2.15 | 1.04  | 0     | 1.14 | 0.46 | 0 |
| 0.62 | 0.2   | 1     | 1.03 | 0.62 | 0 |
| 0.66 | 0.44  | 1     | 1.12 | 0.14 | 0 |
| 1.26 | 0.52  | 0     | 1.21 | 0.34 | 0 |
| 1.11 | 0.56  | 0     | 1.01 | 0.28 | 0 |
| 1.35 | 0.8   | 1     | 2.29 | 0.88 | 0 |
| 0.87 | 0.18  | 0     | 0.96 | 0.33 | 0 |
| 0.07 | 0.05  | 1     | 0.77 | 0.47 | 1 |
| 1.78 | 0.45  | 0     | 1.11 | 0.82 | 0 |
| 1.72 | 0.17  | 0     | 0.75 | 0.18 | 0 |
| 1.19 | 0.4   | 1     | 1.18 | 0.54 | 0 |
| 1.95 | 0.11  | 0     | 0.94 | 0.37 | 0 |
| 1.38 | 0.36  | 1     | 1.09 | 0.24 | 0 |
| 1.47 | 0.29  | 0     | 0.9  | 0.17 | 0 |
| 1.21 | 0.06  | 1     | 1.05 | 0.18 | 0 |
| 1.79 | 0.43  | 0     | 0.89 | 0.2  | 0 |
| 1.65 | 0.11  | 0     | 0.86 | 0.13 | 0 |
| 1.3  | 0.08  | 0     | 0.8  | 0.14 | 0 |
| 0.98 | 0.23  | 0     | 1.05 | 0.2  | 0 |
| 1.71 | 0.3   | 0     | 1.16 | 0.13 | 0 |
| 1.24 | 0.24  | 0     | 1.03 | 0.48 | 0 |
| 1.16 | 9     | 0     | 0.94 | 0.69 | 0 |
| 9.61 | 39.79 | 1     | 1.67 | 0.84 | 0 |



|      |      |   |      |      |   |
|------|------|---|------|------|---|
| 1.96 | 1.18 | 0 | 1.21 | 0.22 | 0 |
| 1.95 | 0.03 | 0 | 0.94 | 0.65 | 0 |
| 1.93 | 0.44 | 0 | 1.12 | 0.14 | 0 |
| 1.53 | 0.1  | 0 | 0.89 | 0.19 | 0 |
| 1.13 | 0.37 | 0 | 0.91 | 0.27 | 0 |
| 2.59 | 0.39 | 1 | 0.86 | 0.32 | 0 |
| 0.93 | 0.15 | 1 | 0.9  | 0.2  | 0 |
| 0.59 | 0.12 | 1 | 0.97 | 0.12 | 0 |
| 0.52 | 0.05 | 1 | 1.01 | 0.43 | 0 |
| 0.66 | 0.13 | 1 | 1    | 0.29 | 0 |
| 0.6  | 0.06 | 1 | 0.83 | 0.28 | 0 |
| 0.78 | 0.1  | 1 | 0.85 | 0.22 | 0 |
| 0.8  | 0.03 | 1 | 0.89 | 0.14 | 0 |
| 0.12 | 0.01 | 1 | 0.75 | 0.98 | 0 |
| 1.92 | 0.5  | 0 | 1.36 | 0.44 | 0 |
| 1.94 | 1.81 | 0 | 1.2  | 0.31 | 0 |
| 1.48 | 0.6  | 0 | 0.99 | 3.23 | 0 |
| 0.83 | 0.51 | 1 | 1.17 | 0.45 | 0 |
| 1.16 | 1.19 | 0 | 1.1  | 0.3  | 0 |
| 2.18 | 0.59 | 0 | 1.22 | 1.16 | 0 |
| 1.59 | 0.67 | 0 | 0.89 | 0.22 | 0 |
| 1.54 | 0.24 | 0 | 1.02 | 0.19 | 0 |
| n/a  | n/a  | 0 | n/a  | n/a  | 0 |
| 0.89 | 0.21 | 1 | 1.09 | 0.19 | 0 |
| 1.03 | 0.08 | 0 | 0.97 | 0.32 | 0 |
| 1.35 | 0.39 | 1 | 1.13 | 0.26 | 0 |
| 2.32 | 0.44 | 0 | 0.9  | 0.22 | 0 |
|      |      | 0 | 0.97 | 0.44 | 0 |
| 1.84 | 0.34 | 0 | 0.77 | 0.32 | 0 |
| 1.61 | 0.3  | 1 | 1.04 | 0.32 | 0 |
| 1.2  | 0.25 | 1 | 1    | 0.11 | 0 |
| 1.01 | 0.26 | 1 | 1.21 | 0.34 | 0 |
| 2.71 | 2.19 | 0 | 1.33 | 0.42 | 0 |
| 1.93 | 0.93 | 0 | 0.95 | 0.69 | 0 |
| 1.6  | 0.26 | 0 | 1.34 | 0.4  | 0 |
| 1.13 | 0.1  | 0 | 1.27 | 0.31 | 0 |
| 1.54 | 0.2  | 0 | 1.23 | 0.34 | 0 |
| 1.38 | 0.18 | 0 | 1.08 | 0.18 | 0 |
| 0.71 | 0.16 | 1 | 1.46 | 0.26 | 0 |
| 1.66 | 0.34 | 0 | 1.01 | 0.31 | 0 |
| n/a  | n/a  | 0 | n/a  | n/a  | 0 |
| 1.17 | 0.48 | 1 | 1.31 | 0.43 | 0 |
|      |      | 0 | 0.86 | 0.43 | 0 |
| n/a  | n/a  | 0 | n/a  | n/a  | 0 |
| 1.47 | 0.37 | 0 | 0.87 | 0.12 | 0 |
| 0.58 | 0.11 | 1 | 1    | 0.13 | 0 |
| 1.66 | 0.06 | 0 | 1.27 | 0.25 | 0 |
| 0.87 | 0.46 | 0 | 1    | 0.21 | 0 |
| 1.68 | 0.33 | 0 | 1.01 | 0.38 | 0 |
| 2.68 | 1.04 | 0 | 0.91 | 0.56 | 0 |
| 1.43 | 0.49 | 0 | 1.52 | 0.44 | 0 |
| 0.95 | 0.64 | 1 | 0.99 | 0.22 | 0 |

|     |      |      |       |      |      |   |
|-----|------|------|-------|------|------|---|
|     | 1.42 | 0.35 | 0     | 1.03 | 0.28 | 0 |
|     | 1.66 | 0.1  | 0     | 1.22 | 0.48 | 0 |
|     | 1.74 | 0.13 | 0     | 1.17 | 0.24 | 0 |
|     | 2.15 | 1.06 | 0     | 1.09 | 0.42 | 0 |
|     | 1.42 | 0.46 | 0     | 0.73 | 0.17 | 0 |
|     | 2.78 | 0.9  | 0     | 0.92 | 0.29 | 0 |
|     | 1.78 | 0.16 | 0     | 0.82 | 0.22 | 0 |
|     | 1.22 | 0.24 | 1     | 0.91 | 0.24 | 0 |
|     | 1.54 | 0.46 | 0     | 0.9  | 0.17 | 0 |
|     | 1.29 | 0.41 | 0     | 0.95 | 0.4  | 0 |
|     | 1.05 | 0.06 | 1     | 1.03 | 0.2  | 0 |
|     | 1.69 | 0.22 | 0     | 1.05 | 0.2  | 0 |
|     | 1.51 | 0.35 | 0     | 0.96 | 0.09 | 0 |
|     | 1.39 | 0.49 | 0     | 0.84 | 0.22 | 0 |
|     | 1.02 | 0.27 | 1     | 0.98 | 0.16 | 0 |
|     | 2.32 | 0.11 | 0     | 1.24 | 0.29 | 0 |
|     | 2.15 | 0.66 | 0     | 0.82 | 0.44 | 0 |
|     | 1.4  | 0.27 | 0     | 1.12 | 0.25 | 0 |
|     | 2.03 | 0.08 | 0     | 1.05 | 0.29 | 0 |
| n/a | n/a  |      | 0 n/a | n/a  |      | 0 |
|     | 2.33 | 0.16 | 0     | 1.21 | 0.2  | 0 |
|     | 1.87 | 0.32 | 0     | 0.82 | 0.09 | 0 |
| n/a | n/a  |      | 0 n/a | n/a  |      | 0 |
|     | 1.53 | 0.22 | 0     | 1.14 | 0.43 | 0 |
|     | 1.82 | 0.42 | 0     | 1.19 | 0.21 | 0 |
|     | 0.08 | 0.01 | 1     | 0.68 | 0.49 | 1 |
|     | 1.39 | 0.06 | 1     | 1.49 | 0.34 | 0 |
|     | 1.08 | 0.17 | 1     | 0.95 | 0.18 | 0 |
|     | 1.2  | 0.44 | 0     | 1.06 | 0.5  | 0 |
|     | 1.16 | 0.78 | 0     | 1.02 | 0.12 | 0 |
|     | 1.36 | 0.12 | 1     | 1.01 | 0.26 | 0 |
|     | 1.33 | 0.1  | 1     | 1.2  | 0.33 | 0 |
|     | 1.44 | 0.13 | 0     | 1.09 | 0.26 | 0 |
|     | 0.52 | 0.57 | 1     | 0.9  | 0.16 | 0 |
|     | 1.16 | 0.34 | 1     | 1.48 | 0.45 | 0 |
|     | 1.71 | 0.05 | 0     | 1.44 | 0.38 | 0 |
|     | 1.2  | 0.02 | 0     | 0.98 | 0.84 | 0 |
|     | 1.08 | 0.32 | 0     | 0.84 | 0.77 | 0 |
|     | 1.38 | 0.39 | 0     | 0.98 | 0.48 | 0 |
|     | 2.94 | 0.63 | 1     | 1.34 | 1.07 | 1 |
|     | 1.4  | 0.47 | 1     | 1.21 | 0.17 | 0 |
|     | 2.16 | 0.41 | 0     | 1.17 | 0.29 | 0 |
|     | 0.11 | 0.03 | 1     | 1.25 | 0.42 | 1 |
|     | 0.76 | 0.04 | 1     | 0.98 | 0.05 | 0 |
|     | 1.78 | 0.71 | 0     | 0.94 | 0.25 | 0 |
|     | 1.95 | 0.23 | 1     | 1.47 | 0.37 | 0 |
|     | 1.93 | 0.41 | 0     | 0.85 | 0.37 | 0 |
|     | 1.98 | 0.43 | 0     | 1.07 | 0.12 | 0 |
| n/a | n/a  |      | 0 n/a | n/a  |      | 0 |
| n/a | n/a  |      | 0 n/a | n/a  |      | 0 |
| n/a | n/a  |      | 0 n/a | n/a  |      | 0 |
|     | 1.61 | 1.49 | 0     | 1.23 | 0.27 | 0 |



|     |      |      |       |      |      |   |
|-----|------|------|-------|------|------|---|
|     | 1.52 | 0.37 | 0     | 0.78 | 0.3  | 0 |
|     | 1.89 | 1    | 0     | 1.11 | 0.25 | 0 |
|     | 1.56 | 3.15 | 0     | 1.34 | 0.31 | 0 |
|     | 1.63 | 0.33 | 0     | 1.14 | 0.43 | 0 |
|     | 1.3  | 0.52 | 0     | 0.91 | 0.27 | 0 |
|     | 1.54 | 0.26 | 1     | 1.31 | 0.19 | 0 |
|     | 0.93 | 0.43 | 0     | 2.01 | 0.55 | 0 |
|     | 1.53 | 0.26 | 0     | 1.05 | 0.2  | 0 |
|     | 0.94 | 0.3  | 1     | 1.13 | 0.34 | 0 |
|     | 1.82 | 0.46 | 0     | 0.87 | 0.11 | 0 |
|     | 0.84 | 0.1  | 1     | 0.89 | 0.24 | 0 |
|     | 1.5  | 0.17 | 0     | 0.93 | 0.23 | 0 |
|     | 0.59 | 0.06 | 1     | 0.99 | 0.21 | 0 |
|     | 1.38 | 0.39 | 1     | 0.81 | 0.24 | 0 |
|     | 1.99 | 0.21 | 0     | 0.98 | 0.24 | 0 |
|     | 1.66 | 0.33 | 0     | 0.88 | 0.15 | 0 |
|     | 1.01 | 0.24 | 1     | 1.21 | 0.58 | 1 |
|     | 1.72 | 0.24 | 0     | 0.82 | 0.14 | 0 |
|     | 1.67 | 0.34 | 0     | 0.99 | 0.29 | 0 |
|     | 1.65 | 0.67 | 1     | 0.86 | 0.22 | 0 |
| n/a | n/a  |      | 0 n/a | n/a  |      | 0 |
|     | 1.43 | 0.27 | 0     | 1.22 | 0.3  | 0 |
|     | 1.57 | 0.24 | 0     | 0.85 | 0.14 | 0 |
| n/a | n/a  |      | 0 n/a | n/a  |      | 0 |
|     |      |      | 0     | 1.12 | 0.26 | 0 |
|     | 1.43 | 0.59 | 0     | 0.81 | 0.15 | 0 |
|     | 0.65 | 0.28 | 1     | 1.11 | 0.18 | 0 |
|     | 1.5  | 0.38 | 0     | 0.96 | 0.43 | 0 |
|     | 1.67 | 0.57 | 0     | 0.8  | 0.28 | 0 |
|     | 0.89 | 0.4  | 1     | 1.02 | 0.26 | 0 |
|     | 1.11 | 0.14 | 0     | 1.18 | 0.31 | 0 |
|     | 0.8  | 0    | 1     | 1.09 | 0.24 | 0 |
|     | 0.18 | 0.04 | 1     | 1.04 | 0.42 | 1 |
|     | 0.14 | 0.04 | 1     | 0.76 | 0.21 | 0 |
|     |      |      | 0     | 0.82 | 0.18 | 0 |
|     | 0.55 | 0.11 | 1     | 1.11 | 0.39 | 0 |
|     | 0.41 | 0.06 | 1     | 1.04 | 0.3  | 0 |
|     | 0.58 | 0.06 | 1     | 0.99 | 0.08 | 0 |
|     | 1.88 | 0.13 | 0     | 1.05 | 0.15 | 0 |
|     | 0.47 | 0.05 | 1     | 0.88 | 0.28 | 0 |
|     | 1.85 | 0.32 | 0     | 0.97 | 0.24 | 0 |
|     | 1.12 | 0.14 | 1     | 1.19 | 0.25 | 0 |
|     | 1.62 | 0.61 | 0     | 0.8  | 0.21 | 0 |
|     | 2.21 | 0.39 | 0     | 1.02 | 0.2  | 0 |
|     | 1.9  | 0.35 | 0     | 0.96 | 0.3  | 0 |
| n/a | n/a  |      | 0 n/a | n/a  |      | 0 |
| n/a | n/a  |      | 0 n/a | n/a  |      | 0 |
|     | 2.29 | 0.24 | 0     | 0.99 | 0.24 | 0 |
|     | 1.68 | 0.25 | 0     | 1.01 | 0.35 | 0 |
| n/a | n/a  |      | 0 n/a | n/a  |      | 0 |
|     | 2.19 | 0.35 | 0     | 0.99 | 0.26 | 0 |
| n/a | n/a  |      | 0 n/a | n/a  |      | 0 |

|     |      |      |       |      |      |   |
|-----|------|------|-------|------|------|---|
|     | 0.37 | 0.05 | 1     | 0.73 | 0.26 | 0 |
|     |      |      | 1     | 0.91 | 0.26 | 1 |
|     | 1.23 | 0.18 | 0     | 1.02 | 0.32 | 0 |
|     | 1.41 | 0.34 | 0     | 0.85 | 0.23 | 0 |
|     | 1.54 | 0.33 | 1     | 0.98 | 0.06 | 0 |
|     | 4.47 | 2.4  | 1     | 0.86 | 0.17 | 0 |
|     | 0.88 | 0.22 | 1     | 0.86 | 0.24 | 0 |
|     | 1.5  | 0.22 | 0     | 0.82 | 0.2  | 0 |
|     | 1.5  | 0.41 | 0     | 1.01 | 0.06 | 0 |
|     |      |      | 0     | 1    | 0.16 | 0 |
| n/a | n/a  |      | 0 n/a | n/a  |      | 0 |
| n/a | n/a  |      | 0 n/a | n/a  |      | 0 |
|     | 1.01 | 0.08 | 1     | 0.86 | 0.11 | 0 |
|     | 1.99 | 0.19 | 0     | 0.84 | 0.25 | 0 |
|     | 0.88 | 0.17 | 1     | 1.15 | 0.25 | 0 |
|     | 1.62 | 0.27 | 0     | 0.95 | 0.22 | 0 |
|     | 1.78 | 0.08 | 0     | 0.86 | 0.18 | 0 |
|     | 1.67 | 0.37 | 0     | 0.77 | 0.3  | 0 |
|     | 0.32 | 0.11 | 1     | 1.56 | 0.37 | 1 |
|     | 1.21 | 0.26 | 0     | 0.98 | 0.36 | 0 |
| n/a | n/a  |      | 0 n/a | n/a  |      | 0 |
|     | 0.75 | 0.07 | 1     | 0.92 | 0.19 | 0 |
| n/a | n/a  |      | 0 n/a | n/a  |      | 0 |
|     | 0.77 | 0.09 | 1     | 0.83 | 0.12 | 0 |
|     | 1.19 | 0.64 | 0     | 0.83 | 0.13 | 0 |
|     | 1.3  | 0.46 | 0     | 1.02 | 0.27 | 0 |
| n/a | n/a  |      | 0 n/a | n/a  |      | 0 |
|     |      |      | 0     | 0.96 | 0.21 | 0 |
|     | 1.72 | 0.16 | 0     | 0.97 | 0.26 | 0 |
|     | 0.35 | 0.03 | 1     | 0.75 | 0.23 | 0 |
|     | 0.8  | 0.09 | 1     | 0.91 | 0.3  | 0 |
|     | 1.91 | 0.04 | 0     | 0.9  | 0.3  | 0 |
|     | 1.88 | 0.13 | 0     | 0.88 | 0.12 | 0 |
| n/a | n/a  |      | 0 n/a | n/a  |      | 0 |
|     | 1.63 | 0.58 | 0     | 0.91 | 0.15 | 0 |
|     | 1.32 | 0.54 | 1     | 0.75 | 0.33 | 0 |
|     | 1.76 | 0.49 | 0     | 0.89 | 0.16 | 0 |
|     | 1.86 | 0.28 | 0     | 0.84 | 0.07 | 0 |
| n/a | n/a  |      | 0 n/a | n/a  |      | 0 |
|     | 2.16 | 0.63 | 0     | 0.96 | 0.68 | 0 |
|     | 1.65 | 0.19 | 0     | 0.81 | 0.48 | 0 |
|     | 1.16 | 5.54 | 0     | 0.83 | 0.18 | 0 |
|     |      |      | 1     | 0.95 | 0.19 | 0 |
|     | 1.89 | 0.27 | 0     | 1.2  | 0.24 | 0 |
|     | 1.17 | 0.2  | 1     | 0.94 | 0.13 | 0 |
|     | 1.79 | 0.43 | 0     | 1.05 | 0.21 | 0 |
|     | 2.83 | 0.93 | 1     | 1.59 | 1.03 | 0 |
|     | 1.33 | 0.32 | 0     | 0.9  | 0.33 | 0 |
|     | 0.54 | 0.12 | 1     | 0.92 | 0.14 | 0 |
|     | 8.54 | 1.75 | 1     | 1.13 | 0.81 | 0 |
|     | 0.5  | 0.04 | 1     | 0.91 | 0.28 | 0 |
|     | 1.27 | 0.08 | 0     | 1.03 | 0.35 | 0 |

|     |      |      |       |      |      |   |
|-----|------|------|-------|------|------|---|
|     | 1.33 | 1.2  | 0     | 1.06 | 0.46 | 0 |
| n/a | n/a  |      | 0 n/a | n/a  |      | 0 |
|     |      |      | 0     | 0.9  | 0.5  | 0 |
|     | 1.23 | 0.55 | 0     | 0.96 | 1.2  | 0 |
|     | 2.05 | 0.14 | 0     | 0.81 | 0.13 | 0 |
|     | 0.91 | 0.17 | 1     | 0.86 | 0.21 | 0 |
|     | 1.43 | 0.35 | 0     | 0.88 | 0.19 | 0 |
|     |      |      | 0     | 0.99 | 0.33 | 0 |
|     | 1.6  | 0.29 | 0     | 0.93 | 0.16 | 0 |
|     | 2.08 | 0.52 | 0     | 0.88 | 0.17 | 0 |
|     | 1.92 | 0.16 | 1     | 0.86 | 0.29 | 0 |
|     | 1.18 | 0.61 | 0     | 0.79 | 0.2  | 0 |
|     | 2.01 | 0.33 | 0     | 1.11 | 0.24 | 0 |
|     | 0.7  | 0.1  | 1     | 0.87 | 0.22 | 0 |
|     | 1.17 | 0.07 | 1     | 1.18 | 0.18 | 0 |
|     | 1.74 | 0.37 | 1     | 1.43 | 0.3  | 0 |
|     | 4.17 | 0.49 | 1     | 1.19 | 0.29 | 0 |
|     | 1.69 | 0.3  | 0     | 0.97 | 0.44 | 0 |
|     | 0.68 | 0.04 | 1     | 0.82 | 0.19 | 0 |
|     | 2.14 | 0.23 | 0     | 0.99 | 0.13 | 0 |
|     |      |      | 0     | 0.81 | 0.16 | 0 |
|     | 1.37 | 0.31 | 0     | 1.16 | 0.47 | 0 |
|     | 1.86 | 0.51 | 0     | 0.78 | 0.12 | 0 |
|     | 1.21 | 0.06 | 0     | 1.14 | 0.19 | 0 |
|     |      |      | 0     | 0.79 | 0.2  | 0 |
|     | 3.03 | 0.93 | 1     | 0.8  | 0.19 | 0 |
|     | 1.75 | 0.27 | 0     | 0.78 | 0.26 | 0 |
| n/a | n/a  |      | 0 n/a | n/a  |      | 0 |
|     | 1.95 | 0.42 | 0     | 0.99 | 0.25 | 0 |
|     | 1.5  | 0.33 | 0     | 0.85 | 0.26 | 0 |
|     | 1.39 | 0.08 | 0     | 0.93 | 0.15 | 0 |
|     | 1.05 | 0.3  | 0     | 0.83 | 0.16 | 0 |
| n/a | n/a  |      | 0 n/a | n/a  |      | 0 |
|     | 1.46 | 0.72 | 0     | 0.86 | 0.16 | 0 |
|     | 1.68 | 0.15 | 0     | 0.88 | 0.29 | 0 |
|     | 1.45 | 0.1  | 0     | 1.03 | 0.33 | 0 |
|     |      |      | 1     | 1.04 | 0.58 | 1 |
|     | 1.19 | 0.14 | 0     | 0.73 | 0.2  | 0 |
|     | 1.22 | 0.51 | 0     | 0.87 | 0.27 | 0 |
|     | 2.24 | 0.11 | 0     | 1.1  | 0.34 | 0 |
|     | 1.06 | 0.05 | 1     | 0.9  | 0.08 | 0 |
|     | 1.55 | 0.16 | 0     | 0.97 | 0.32 | 0 |
|     | 0.57 | 0.07 | 1     | 1.35 | 0.55 | 0 |
|     | 1.2  | 0.15 | 1     | 1.03 | 0.13 | 0 |
|     | 1.14 | 0.33 | 0     | 0.95 | 0.33 | 0 |
|     | 2.28 | 0.6  | 0     | 0.92 | 0.36 | 0 |
|     | 0.65 | 0.11 | 1     | 1.22 | 0.43 | 0 |
|     | 0.15 | 0    | 1     | 0.97 | 0.39 | 1 |
|     | 1.83 | 0.17 | 0     | 1.02 | 0.26 | 0 |
|     | 1.65 | 0.11 | 0     | 1.01 | 0.26 | 0 |
|     | 2.05 | 0.06 | 0     | 0.96 | 0.49 | 0 |
|     | 2.13 | 0.51 | 0     | 1.18 | 0.27 | 0 |

|      |      |   |      |      |   |
|------|------|---|------|------|---|
| 0.1  | 0.02 | 1 | 0.88 | 0.25 | 1 |
| 1.22 | 1.54 | 0 | 0.85 | 0.51 | 0 |
| 1.24 | 0.6  | 0 | 0.97 | 0.32 | 0 |
| 0.46 | 0.04 | 1 | 1.07 | 0.32 | 0 |
| 1.36 | 0.11 | 0 | 1    | 0.18 | 0 |
| 1.12 | 0.31 | 0 | 0.94 | 0.16 | 0 |
| 0.12 | 0.03 | 1 | 0.75 | 0.32 | 1 |
|      |      | 0 | 0.83 | 0.36 | 0 |
| 1.66 | 0.11 | 1 | 1.34 | 0.19 | 0 |
| 0.24 | 0.03 | 1 | 0.92 | 0.43 | 1 |
| 1.69 | 0.28 | 0 | 0.9  | 0.2  | 0 |
| 1.23 | 0.95 | 0 | 0.87 | 0.39 | 0 |
| 1.81 | 0.33 | 0 | 0.93 | 0.26 | 0 |
| 0.43 | 0.11 | 1 | 0.93 | 0.38 | 0 |
| 1.57 | 0.47 | 0 | 0.82 | 0.28 | 0 |
|      |      | 1 | 0.98 | 0.15 | 0 |
| 1    | 0.14 | 1 | 0.93 | 0.25 | 0 |
| 0.55 | 0.14 | 1 | 0.84 | 0.55 | 1 |
| 1.41 | 0.43 | 0 | 0.81 | 0.43 | 0 |
| 0.97 | 0.43 | 0 | 1.02 | 0.37 | 0 |
| 1.36 | 0.16 | 0 | 0.95 | 0.17 | 0 |
| 1.32 | 0.43 | 0 | 0.77 | 0.24 | 0 |
| 1.7  | 0.99 | 0 | 0.82 | 0.15 | 0 |
| 1.35 | 0.21 | 0 | 1.03 | 0.18 | 0 |
| 1.22 | 0.34 | 0 | 0.93 | 0.11 | 0 |
| 1.65 | 0.38 | 0 | 1.08 | 0.3  | 0 |
|      |      | 0 | 0.74 | 0.14 | 0 |
| 1.83 | 0.47 | 0 | 0.91 | 0.16 | 0 |
| 1.36 | 0.37 | 0 | 0.98 | 0.17 | 0 |
| 0.85 | 0.17 | 1 | 1.02 | 0.12 | 0 |
| 0.83 | 0.1  | 1 | 1.22 | 0.21 | 0 |
| 1.92 | 0.34 | 0 | 1.19 | 0.52 | 0 |
| 1.9  | 0.43 | 0 | 1.26 | 0.25 | 0 |
| 0.62 | 0.04 | 1 | 1.07 | 0.28 | 0 |
| 1.26 | 0.17 | 1 | 1.05 | 0.37 | 0 |
| 1.49 | 0.4  | 0 | 1.02 | 0.14 | 0 |
| 1.87 | 0.27 | 0 | 0.83 | 0.15 | 0 |
| 1.61 | 0.39 | 0 | 0.92 | 0.11 | 0 |
| 1.15 | 0.16 | 1 | 1.13 | 0.25 | 0 |
| 1.26 | 0.22 | 0 | 0.93 | 0.19 | 0 |
| n/a  | n/a  | 0 | n/a  | n/a  | 0 |
| 3.61 | 0.54 | 1 | 1.1  | 0.5  | 0 |
| 1.4  | 0.12 | 0 | 1.07 | 0.35 | 0 |
| 1.51 | 0.24 | 1 | 0.97 | 0.22 | 0 |
| 1.02 | 0.1  | 1 | 1.01 | 0.22 | 0 |
| 1.09 | 0.1  | 1 | 1    | 0.29 | 0 |
| 1.03 | 0.09 | 1 | 0.97 | 0.3  | 0 |
| 1.5  | 0.49 | 0 | 1.08 | 0.28 | 0 |
| 1.66 | 0.07 | 0 | 0.93 | 0.29 | 0 |
| 1.23 | 0.41 | 0 | 0.95 | 0.26 | 0 |
| 1.63 | 0.43 | 0 | 0.99 | 0.28 | 0 |
| 0.3  | 0.11 | 1 | 0.68 | 0.16 | 0 |

|     |      |       |   |      |      |   |
|-----|------|-------|---|------|------|---|
|     | 1.18 | 0.19  | 1 | 1.23 | 0.3  | 0 |
|     | 1.46 | 0.17  | 0 | 0.89 | 0.15 | 0 |
|     | 1.14 | 0.37  | 0 | 0.74 | 0.11 | 0 |
|     | 1.23 | 0.05  | 0 | 1.18 | 0.43 | 0 |
|     | 1.57 | 0.05  | 1 | 1.13 | 0.36 | 0 |
| n/a | n/a  |       | 0 | n/a  | n/a  | 0 |
|     | 1.94 | 0.34  | 0 | 0.82 | 0.48 | 0 |
|     | 0.88 | 0.16  | 1 | 1.04 | 0.2  | 0 |
|     | 1.67 | 0.25  | 0 | 1.06 | 0.15 | 0 |
|     | 0.73 | 0.02  | 1 | 0.97 | 0.04 | 0 |
|     | 1.37 | 0.63  | 0 | 0.94 | 0.26 | 0 |
|     | 0.39 | 0.6   | 1 | 0.97 | 0.17 | 0 |
|     | 0.91 | 0.15  | 0 | 0.78 | 0.32 | 0 |
|     | 0.55 | 0.08  | 1 | 1.04 | 0.15 | 0 |
|     | 1.75 | 0.4   | 0 | 1.02 | 0.18 | 0 |
|     | 1.24 | 0.26  | 0 | 0.88 | 0.28 | 0 |
|     | 1.49 | 0.1   | 0 | 0.93 | 0.37 | 0 |
|     | 1.24 | 0.19  | 0 | 0.76 | 0.16 | 0 |
|     | 1.03 | 0.13  | 1 | 1.12 | 0.17 | 0 |
|     | 0.07 | 0.01  | 1 | 0.75 | 0.21 | 1 |
|     | 1.74 | 0.43  | 1 | 1.15 | 0.22 | 0 |
|     | 1.45 | 0.15  | 0 | 1.15 | 0.17 | 0 |
|     | 0.03 | 0.01  | 1 | 0.83 | 0.2  | 1 |
|     | 1.59 | 0.22  | 0 | 0.96 | 0.18 | 0 |
|     | 0.08 | 0.01  | 1 | 0.84 | 0.27 | 1 |
|     | 1.06 | 0.09  | 1 | 0.83 | 0.16 | 0 |
|     | 2.2  | 0.33  | 0 | 1.15 | 0.34 | 0 |
|     | 1.38 | 0.11  | 0 | 0.96 | 0.14 | 0 |
|     | 1.04 | 0.05  | 1 | 1.03 | 0.29 | 0 |
|     |      |       | 1 | 1.32 | 0.38 | 0 |
|     | 1.2  | 0.38  | 1 | 1.13 | 0.1  | 0 |
|     | 1.75 | 0.37  | 0 | 1.08 | 0.16 | 0 |
|     | 1.7  | 21.88 | 0 | 1.14 | 0.35 | 0 |
|     | 1.61 | 1.74  | 0 | 1.05 | 0.4  | 0 |
|     | 1.44 | 0.15  | 0 | 0.9  | 0.11 | 0 |
|     | 1.39 | 0.42  | 0 | 0.96 | 0.32 | 0 |
|     | 1.19 | 0.17  | 0 | 0.86 | 0.15 | 0 |
|     | 1.94 | 0.31  | 0 | 0.95 | 0.24 | 0 |
|     | 1.55 | 0.38  | 1 | 0.99 | 0.25 | 0 |
|     | 3.33 | 1.17  | 1 | 0.87 | 0.19 | 0 |
|     | 0.89 | 0.15  | 1 | 1.08 | 0.34 | 0 |
|     | 1.25 | 0.26  | 0 | 0.83 | 0.43 | 0 |
|     | 1.66 | 0.37  | 0 | 0.9  | 0.22 | 0 |
|     | 1.68 | 0.53  | 0 | 0.93 | 0.17 | 0 |
| n/a | n/a  |       | 0 | n/a  | n/a  | 0 |
|     | 0.54 | 0.1   | 1 | 0.96 | 0.22 | 0 |
| n/a | n/a  |       | 0 | n/a  | n/a  | 0 |
|     | 1.58 | 0.31  | 1 | 1.08 | 0.21 | 0 |
| n/a | n/a  |       | 0 | n/a  | n/a  | 0 |
|     | 0.87 | 0.24  | 0 | 1.09 | 0.14 | 0 |
|     | 0.86 | 0.04  | 1 | 0.95 | 0.38 | 0 |
|     | 1.16 | 0.54  | 0 | 1.23 | 0.31 | 0 |



|      |      |   |      |      |   |
|------|------|---|------|------|---|
| n/a  | n/a  | 0 | n/a  | n/a  | 0 |
| 1.71 | 0.17 | 0 | 0.72 | 0.21 | 0 |
| 2.31 | 0.6  | 0 | 1.03 | 0.15 | 0 |
| 1.19 | 0.25 | 1 | 0.99 | 0.28 | 0 |
| 2.03 | 0.52 | 0 | 0.88 | 0.1  | 0 |
|      |      | 0 | 0.8  | 0.22 | 0 |
| 1.22 | 0.1  | 0 | 1.07 | 0.17 | 0 |
| 0.06 | 0.02 | 1 | 0.73 | 0.21 | 1 |
| 0.12 | 0.03 | 1 | 0.63 | 0.21 | 1 |
| 1.53 | 1.07 | 0 | 1.16 | 0.31 | 0 |
| 1.64 | 0.42 | 0 | 0.74 | 0.55 | 0 |
| 0.69 | 0.19 | 1 | 1.08 | 0.23 | 0 |
|      |      | 1 | 3.51 | 0.75 | 0 |
| 1.75 | 0.54 | 0 | 1.15 | 0.37 | 0 |
| n/a  | n/a  | 0 | n/a  | n/a  | 0 |
| n/a  | n/a  | 0 | n/a  | n/a  | 0 |
| 1.45 | 0.25 | 0 | 1.07 | 0.22 | 0 |
|      |      | 1 | 1.6  | 0.39 | 1 |
| 1.66 | 0.02 | 0 | 0.97 | 0.22 | 0 |
| 0.43 | 0.04 | 1 | 0.93 | 0.53 | 1 |
| 0.9  | 0.3  | 1 | 0.79 | 0.05 | 0 |
| 0.86 | 0.08 | 1 | 1.03 | 0.23 | 0 |
| 1.43 | 0.14 | 0 | 1.06 | 0.13 | 0 |
| 1.45 | 0.29 | 1 | 0.82 | 0.25 | 0 |
| 2.33 | 0.61 | 0 | 0.73 | 0.23 | 0 |
| 2.1  | 0.43 | 0 | 1.07 | 0.36 | 0 |
| 1.64 | 0.21 | 0 | 0.85 | 0.25 | 0 |
| 2.17 | 0.33 | 0 | 0.94 | 0.63 | 0 |
| 1.22 | 0.04 | 1 | 0.99 | 0.15 | 0 |
| n/a  | n/a  | 0 | n/a  | n/a  | 0 |
| n/a  | n/a  | 0 | n/a  | n/a  | 0 |
| n/a  | n/a  | 0 | n/a  | n/a  | 0 |
| n/a  | n/a  | 0 | n/a  | n/a  | 0 |
| n/a  | n/a  | 0 | n/a  | n/a  | 0 |
| n/a  | n/a  | 0 | n/a  | n/a  | 0 |
| n/a  | n/a  | 0 | n/a  | n/a  | 0 |
| n/a  | n/a  | 0 | n/a  | n/a  | 0 |
| n/a  | n/a  | 0 | n/a  | n/a  | 0 |
| n/a  | n/a  | 0 | n/a  | n/a  | 0 |
| n/a  | n/a  | 0 | n/a  | n/a  | 0 |
| 1.49 | 0.13 | 0 | 0.9  | 0.28 | 0 |
| 1.86 | 0.09 | 0 | 0.87 | 0.27 | 0 |
| n/a  | n/a  | 0 | n/a  | n/a  | 0 |
| 0.69 | 0.05 | 1 | 1    | 0.3  | 0 |
| n/a  | n/a  | 0 | n/a  | n/a  | 0 |
|      |      | 1 | 0.85 | 0.27 | 0 |
| 1.31 | 0.32 | 0 | 0.75 | 0.21 | 0 |
| 1.11 | 0.39 | 0 | 0.86 | 0.37 | 0 |
| 1.53 | 16.5 | 0 | 2.08 | 0.88 | 0 |
|      |      | 0 | 0.86 | 0.49 | 0 |
| 1.28 | 0.44 | 0 | 1.08 | 0.07 | 0 |

|      |      |   |      |      |   |
|------|------|---|------|------|---|
| 1.57 | 0.43 | 0 | 1    | 0.24 | 0 |
| 1.77 | 0.16 | 0 | 1.28 | 0.33 | 0 |
| 2.23 | 1.4  | 0 | 0.67 | 0.44 | 0 |
| 1.51 | 0.36 | 0 | 1.11 | 0.21 | 0 |
| 1.4  | 0.1  | 0 | 0.73 | 0.31 | 0 |
| 1.28 | 0.15 | 1 | 1.51 | 0.23 | 0 |
| 1.66 | 0.6  | 0 | 0.86 | 0.24 | 0 |
| 2.05 | 0.69 | 0 | 0.8  | 0.24 | 0 |
| 2    | 0.29 | 0 | 0.83 | 0.14 | 0 |
| 1.34 | 0.13 | 1 | 0.94 | 0.3  | 0 |
| 1.11 | 0.09 | 0 | 0.87 | 0.18 | 0 |
| 1.35 | 0.38 | 0 | 0.83 | 0.21 | 0 |
| 1.78 | 0.44 | 0 | 0.86 | 0.18 | 0 |
| 1.93 | 0.78 | 0 | 0.97 | 0.55 | 0 |
| 1.01 | 0.12 | 1 | 1.04 | 0.2  | 0 |
| 1.11 | 0.53 | 0 | 1    | 0.14 | 0 |
| 1.53 | 0.37 | 0 | 0.95 | 0.17 | 0 |
| 1.75 | 0.08 | 0 | 1.1  | 0.3  | 0 |
| 2.13 | 1.26 | 0 | 0.89 | 0.27 | 0 |
| 1.37 | 0.33 | 0 | 0.98 | 0.38 | 0 |
| 1.67 | 0.39 | 0 | 0.99 | 0.29 | 0 |
| 1.91 | 0.36 | 0 | 0.93 | 0.04 | 0 |
| 1.86 | 0.08 | 0 | 1.13 | 0.43 | 0 |
| 1.35 | 0.22 | 0 | 0.97 | 0.12 | 0 |
| 1.34 | 0.42 | 0 | 0.86 | 0.28 | 0 |
| 1.77 | 0.1  | 0 | 0.94 | 0.15 | 0 |
| 1.89 | 0.4  | 0 | 1    | 0.12 | 0 |
| 1.03 | 0.24 | 1 | 1.07 | 0.34 | 1 |
| 2.04 | 0.31 | 0 | 1.09 | 0.17 | 0 |
| 1.69 | 0.32 | 0 | 0.85 | 0.31 | 0 |
| 1.33 | 0.02 | 0 | 0.99 | 0.28 | 0 |
| 1.38 | 0.24 | 1 | 1.19 | 0.49 | 0 |
| 0.9  | 0.04 | 1 | 0.81 | 0.23 | 0 |
| 1.2  | 0.41 | 0 | 1    | 0.3  | 0 |
| 0.84 | 0.09 | 0 | 1.01 | 0.18 | 0 |
| 2.56 | 1.18 | 0 | 0.87 | 0.22 | 0 |
| 1.79 | 0.28 | 0 | 0.83 | 0.37 | 0 |
| 0.82 | 0.03 | 1 | 0.91 | 0.22 | 0 |
|      |      | 0 | 1    | 0.37 | 0 |
| 0.1  | 0.02 | 1 | 0.76 | 0.28 | 1 |
| 1.25 | 0.39 | 0 | 1.11 | 0.2  | 0 |
| 1.05 | 0.12 | 1 | 0.91 | 0.26 | 0 |
| 1.09 | 0.17 | 1 | 1.11 | 0.5  | 0 |
| 1.27 | 0.37 | 1 | 1.13 | 0.34 | 0 |
| 1.09 | 0.21 | 1 | 0.78 | 0.3  | 0 |
| 1.56 | 0.11 | 1 | 1.06 | 0.3  | 0 |
| 1.01 | 0.12 | 1 | 1.46 | 0.45 | 0 |
| 1.49 | 0.3  | 0 | 0.92 | 0.32 | 0 |
| 1.58 | 0.34 | 0 | 0.92 | 0.24 | 0 |
| n/a  | n/a  | 0 | n/a  | n/a  | 0 |
| 1.41 | 0.13 | 0 | 0.95 | 0.18 | 0 |
| n/a  | n/a  | 0 | n/a  | n/a  | 0 |

|     |      |      |   |      |      |   |
|-----|------|------|---|------|------|---|
|     | 2.03 | 0.39 | 0 | 1    | 0.29 | 0 |
|     | 2.01 | 0.51 | 0 | n/a  | n/a  | 0 |
| n/a | n/a  |      | 0 | n/a  | n/a  | 0 |
|     | 1.06 | 0.26 | 1 | 0.9  | 0.15 | 0 |
|     |      |      | 1 | 0.98 | 0.2  | 1 |
|     | 0.91 | 0.18 | 1 | 1.19 | 0.31 | 0 |
| n/a | n/a  |      | 0 | n/a  | n/a  | 0 |
|     | 1.99 | 0.5  | 0 | 0.9  | 0.5  | 0 |
|     | 1.75 | 0.08 | 0 | 0.85 | 0.3  | 0 |
| n/a | n/a  |      | 0 | n/a  | n/a  | 0 |
|     | 1.48 | 0.19 | 0 | 0.97 | 0.34 | 0 |
|     | 1.47 | 0.31 | 0 | 0.92 | 0.17 | 0 |
|     | 1.29 | 0.35 | 0 | 1.02 | 0.34 | 0 |
|     | 1.19 | 0.18 | 0 | 0.94 | 0.27 | 0 |
|     | 1.14 | 0.3  | 0 | 0.97 | 0.22 | 0 |
|     | 1.55 | 0.32 | 0 | 1.12 | 0.17 | 0 |
|     | 0.25 | 0.1  | 1 | 0.74 | 0.22 | 1 |
|     | 1.4  | 0.26 | 0 | 1.01 | 0.72 | 0 |
|     | 2.59 | 0.78 | 0 | 1    | 0.36 | 0 |
| n/a | n/a  |      | 0 | n/a  | n/a  | 0 |
| n/a | n/a  |      | 0 | n/a  | n/a  | 0 |
|     | 1.04 | 0.13 | 1 | 1.15 | 0.23 | 0 |
|     | 1.77 | 0.21 | 0 | 0.9  | 0.32 | 0 |
|     | 1.26 | 0.41 | 0 | 1.09 | 0.34 | 0 |
|     | 2.56 | 0.44 | 0 | 0.92 | 0.34 | 0 |
|     | 1.99 | 0.23 | 0 | 1.91 | 0.56 | 0 |
| n/a | n/a  |      | 0 | n/a  | n/a  | 0 |
|     | 1.13 | 0.45 | 0 | 1.13 | 0.63 | 0 |
| n/a | n/a  |      | 0 | n/a  | n/a  | 0 |
|     | 1.26 | 0.35 | 0 | 1.02 | 0.24 | 0 |
|     | 0.62 | 0.06 | 1 | 1    | 0.11 | 0 |
| n/a | n/a  |      | 0 | n/a  | n/a  | 0 |
|     | 1.14 | 0.26 | 0 | 0.83 | 0.16 | 0 |
|     | 1.04 | 0.18 | 0 | 1.11 | 0.33 | 0 |
|     | 1.18 | 0.07 | 0 | 0.97 | 0.23 | 0 |
|     | 1.39 | 0.08 | 0 | 1.08 | 0.23 | 0 |
|     | 0.71 | 0.17 | 1 | 1.25 | 0.33 | 1 |
|     | 1.77 | 0.15 | 0 | 1.29 | 4.49 | 0 |
|     | 0.74 | 0.13 | 1 | 1.08 | 0.56 | 0 |
|     | 1.93 | 0.26 | 0 | 0.8  | 0.16 | 0 |
|     | 1.84 | 0.06 | 0 | 0.98 | 0.21 | 0 |
|     | 2.01 | 0.38 | 0 | 0.8  | 0.23 | 0 |
|     | 1.31 | 0.23 | 0 | 1.04 | 0.53 | 0 |
|     | 1.61 | 0.17 | 0 | 1.08 | 0.7  | 0 |
| n/a | n/a  |      | 0 | n/a  | n/a  | 0 |
|     | 2.04 | 0.21 | 0 | 1.05 | 0.36 | 0 |
| n/a | n/a  |      | 0 | n/a  | n/a  | 0 |
|     | 1.33 | 0.27 | 1 | 1.03 | 0.28 | 0 |
|     | 2.03 | 0.31 | 0 | 1.11 | 0.24 | 0 |
|     |      |      | 0 | 0.91 | 0.2  | 0 |
|     | 1.6  | 0.37 | 0 | 1    | 0.18 | 0 |
|     | 1.76 | 0.17 | 0 | 0.9  | 0.23 | 0 |

|      |      |   |      |      |   |
|------|------|---|------|------|---|
| 1.64 | 0.51 | 0 | 1.02 | 0.21 | 0 |
| 1.92 | 0.1  | 0 | 0.89 | 0.2  | 0 |
| 1.42 | 0.09 | 0 | 0.98 | 0.25 | 0 |
| 1.27 | 0.05 | 1 | 1.01 | 0.19 | 0 |
| 1.88 | 0.18 | 0 | 1.2  | 0.35 | 0 |
| 1.01 | 0.14 | 0 | 0.99 | 0.59 | 0 |
| 1.89 | 0.28 | 0 | 0.84 | 0.35 | 0 |
| 0.71 | 0.06 | 1 | 1.02 | 0.35 | 0 |
| 1.25 | 0.13 | 0 | 0.98 | 0.27 | 0 |
| 1.25 | 0.28 | 0 | 1.02 | 0.18 | 0 |
| 1.48 | 0.5  | 0 | 0.87 | 0.24 | 0 |
| 1.51 | 0.44 | 0 | 0.85 | 0.08 | 0 |
|      |      | 0 | 1.1  | 0.21 | 0 |
| 2.2  | 0.3  | 1 | 0.89 | 0.19 | 0 |
| 1.51 | 0.35 | 0 | 1.02 | 0.24 | 0 |
| 2.09 | 0.72 | 0 | 0.97 | 0.24 | 0 |
|      |      | 1 | 1.05 | 0.2  | 0 |
| 1.91 | 0.19 | 0 | 1.01 | 0.47 | 0 |
| 1.85 | 0.23 | 0 | 0.88 | 0.26 | 0 |
| 1.61 | 0.37 | 0 | 1.04 | 0.42 | 0 |
| 2.01 | 0.4  | 0 | 1.02 | 0.08 | 0 |
| n/a  | n/a  | 0 | n/a  | n/a  | 0 |
| 1.51 | 0.66 | 0 | 1.01 | 0.19 | 0 |
| 0.81 | 0.01 | 1 | 1.18 | 0.38 | 0 |
| 1.1  | 0.23 | 0 | 1.04 | 0.27 | 0 |
| 0.79 | 0.1  | 1 | 1.11 | 0.22 | 0 |
| 3.6  | 0.1  | 1 | 1.95 | 1.82 | 0 |
| 0.85 | 0.07 | 0 | 1.08 | 0.2  | 0 |
| 0.55 | 0.19 | 1 | 0.94 | 0.18 | 0 |
| 1.26 | 0.25 | 1 | 3.11 | 0.98 | 1 |
| 0.2  | 0.06 | 1 | 1.04 | 0.08 | 0 |
| 2.08 | 0.56 | 0 | 0.86 | 0.18 | 0 |
| n/a  | n/a  | 0 | n/a  | n/a  | 0 |
| 0.46 | 0.04 | 1 | 0.97 | 0.28 | 0 |
| n/a  | n/a  | 0 | n/a  | n/a  | 0 |
| 2.04 | 0.29 | 0 | 1.08 | 0.19 | 0 |
|      |      | 0 | 1.13 | 0.21 | 0 |
| 1.32 | 0.16 | 0 | 0.92 | 0.31 | 0 |
| 0.57 | 0.09 | 1 | 0.99 | 0.43 | 0 |
| 1.52 | 0.24 | 0 | 0.99 | 0.63 | 0 |
|      |      | 0 | 1.2  | 0.19 | 0 |
| 1.68 | 0.4  | 0 | 0.82 | 0.45 | 0 |
| 0.57 | 0.08 | 1 | 1.05 | 0.11 | 0 |
| 1.97 | 0.5  | 0 | 1.21 | 0.25 | 0 |
| 2.11 | 0.66 | 0 | 0.94 | 0.24 | 0 |
| 0.81 | 0.09 | 1 | 1.11 | 0.38 | 0 |
| 0.84 | 0.09 | 0 | 1.06 | 0.27 | 0 |
| 1.35 | 0.23 | 1 | 1.07 | 0.15 | 0 |
| 1.5  | 0.2  | 0 | 0.95 | 0.2  | 0 |
| 0.94 | 0.42 | 1 | 1    | 0.13 | 0 |
| 0.73 | 0.09 | 1 | 1.05 | 0.34 | 1 |
| 2.02 | 0.5  | 0 | 1.01 | 0.18 | 0 |

|      |      |       |      |      |   |
|------|------|-------|------|------|---|
| 1.34 | 0.19 | 0     | 0.9  | 0.17 | 0 |
| 1.21 | 0.13 | 0     | 0.84 | 0.36 | 0 |
| 1.88 | 0.49 | 0     | 0.9  | 0.16 | 0 |
| 1.23 | 0.61 | 0     | 1.12 | 0.21 | 0 |
| 1.69 | 0.26 | 0     | 1.05 | 0.23 | 0 |
| 1.45 | 0.4  | 0     | 0.76 | 0.16 | 0 |
| 1.83 | 0.19 | 0     | 0.99 | 0.19 | 0 |
| 1.28 | 0.58 | 0     | 0.91 | 0.4  | 0 |
| 1.8  | 0.51 | 1     | 1.7  | 0.57 | 0 |
| 1.5  | 0.43 | 0     | 0.92 | 0.24 | 0 |
| 1.34 | 0.39 | 0     | 0.93 | 0.23 | 0 |
| 1.66 | 0.27 | 0     | 0.98 | 0.2  | 0 |
| 1.37 | 0.14 | 0 n/a | n/a  |      | 0 |
| 1.62 | 0.38 | 0     | 1.14 | 0.16 | 0 |
| 0.62 | 0.1  | 1     | 0.92 | 0.2  | 0 |
| 0.52 | 0.05 | 1     | 0.85 | 0.28 | 0 |
| 0.85 | 0.02 | 1     | 0.9  | 0.17 | 0 |
| 1.36 | 0.26 | 0     | 1.19 | 0.23 | 0 |
| 1.54 | 0.45 | 0     | 0.99 | 0.19 | 0 |
| 1.35 | 0.2  | 0     | 1.23 | 0.42 | 0 |
| 1.28 | 0.2  | 0     | 0.94 | 0.2  | 0 |
| 1.82 | 0.13 | 0     | 1.13 | 0.48 | 0 |
| 2.15 | 0.43 | 0 n/a | n/a  |      | 0 |
| 1.32 | 0.13 | 0     | 0.87 | 0.16 | 0 |
| 1.79 | 0.11 | 0     | 1.17 | 0.41 | 0 |
| 1.15 | 0.18 | 0     | 1    | 0.24 | 0 |
| 1.72 | 0.5  | 0     | 0.84 | 0.15 | 0 |
| 1.1  | 0.09 | 1     | 0.98 | 0.34 | 0 |
| 1.46 | 0.78 | 0     | 0.97 | 0.24 | 0 |
| 0.7  | 0.02 | 1     | 1.01 | 0.2  | 0 |
| 1.65 | 0.13 | 0     | 0.93 | 0.45 | 0 |
| 1.85 | 0.34 | 0     | 1.01 | 0.24 | 0 |
| 1.32 | 0.24 | 0     | 1.01 | 0.24 | 0 |
| 1.42 | 0.28 | 0     | 0.97 | 0.25 | 0 |
| 1.1  | 0.14 | 1     | 1    | 0.24 | 0 |
| 0.11 | 0.02 | 1     | 0.87 | 0.16 | 1 |
| 0.3  | 0.02 | 1     | 0.93 | 0.23 | 0 |
| 2.04 | 5.33 | 0     | 1.07 | 0.33 | 0 |
|      |      | 0     | 0.9  | 0.23 | 0 |
| 1.26 | 0.27 | 0     | 1.01 | 0.36 | 0 |
| 1.61 | 0.24 | 0     | 1.07 | 0.16 | 0 |
| 1.91 | 0.86 | 0     | 0.94 | 0.16 | 0 |
| 1.25 | 0.13 | 0     | 1.22 | 0.36 | 0 |
| 1.65 | 0.37 | 0     | 0.73 | 0.22 | 0 |
| 2.09 | 0.5  | 0     | 1.04 | 0.25 | 0 |
| 1.43 | 0.27 | 0     | 1.13 | 0.94 | 0 |
| 1.16 | 0.1  | 0     | 1.1  | 0.42 | 0 |
| 1.57 | 0.21 | 0     | 0.74 | 0.35 | 0 |
| 1.55 | 0.11 | 0     | 0.97 | 0.33 | 0 |
| 0.55 | 0.02 | 1     | 0.99 | 0.17 | 0 |
| 1.34 | 0.22 | 0     | 1.04 | 0.15 | 0 |
| 1.43 | 0.1  | 0     | 1.01 | 0.36 | 0 |

|     |      |      |       |      |      |   |
|-----|------|------|-------|------|------|---|
|     | 2.15 | 0.34 | 0     | 0.89 | 0.28 | 0 |
|     | 1.4  | 0.25 | 0     | 0.8  | 0.25 | 0 |
|     | 1.36 | 0.22 | 0     | 1.09 | 0.24 | 0 |
| n/a | n/a  |      | 0 n/a | n/a  |      | 0 |
| n/a | n/a  |      | 0 n/a | n/a  |      | 0 |
|     | 0.81 | 0.3  | 1     | 0.81 | 0.23 | 0 |
|     | 1.01 | 0.11 | 1     | 0.91 | 0.2  | 0 |
| n/a | n/a  |      | 0 n/a | n/a  |      | 0 |
|     | 1.93 | 0.49 | 1     | 0.89 | 0.17 | 0 |
|     | 1.15 | 0.93 | 0     | 0.93 | 0.21 | 0 |
|     | 1.9  | 0.16 | 0     | 0.99 | 0.3  | 0 |
|     | 1.23 | 0.36 | 1     | 0.99 | 0.28 | 0 |
|     | 0.79 | 0.97 | 1     | 0.88 | 0.59 | 0 |
|     | 0.58 | 0.11 | 1     | 1.04 | 0.19 | 0 |
|     | 1.3  | 0.33 | 0     | 1.11 | 0.51 | 0 |
|     | 0.82 | 0.07 | 1     | 0.9  | 0.16 | 0 |
|     | 1.69 | 0.59 | 0     | 1.05 | 0.2  | 0 |
|     | 0.94 | 0.21 | 1     | 0.92 | 0.25 | 0 |
|     | 4.37 | 0.2  | 1     | 1.13 | 0.39 | 0 |
|     | 0.63 | 0.37 | 1     | 1.23 | 0.25 | 0 |
|     | 0.17 | 0.04 | 1     | 1.08 | 0.24 | 0 |
|     | 1.25 | 0.19 | 0     | 1.02 | 0.26 | 0 |
|     | 1.53 | 0.04 | 0     | 0.98 | 0.15 | 0 |
|     | 1.63 | 0.59 | 0     | 0.97 | 0.17 | 0 |
| n/a | n/a  |      | 0 n/a | n/a  |      | 0 |
|     | 1.33 | 0.58 | 0     | 0.76 | 0.17 | 0 |
|     | 1.72 | 0.47 | 0     | 0.91 | 0.39 | 0 |
|     | 0.36 | 0.05 | 1     | 1    | 0.17 | 0 |
|     | 0.82 | 0.09 | 1     | 0.94 | 0.25 | 0 |
|     | 0.86 | 0.21 | 0     | 1.05 | 0.43 | 0 |
|     | 0.45 | 0.03 | 1     | 0.9  | 0.28 | 0 |
|     | 1.31 | 0.32 | 0     | 0.98 | 0.19 | 0 |
|     | 1.28 | 0.1  | 1     | 1.13 | 0.26 | 0 |
|     | 1.22 | 0.61 | 0     | 1.04 | 0.18 | 0 |
|     | 1.37 | 0.39 | 1     | 1.07 | 0.31 | 0 |
|     | 1.92 | 0.62 | 0     | 0.73 | 0.17 | 0 |
|     | 0.94 | 0.03 | 1     | 1.01 | 0.09 | 0 |
|     |      |      | 1     | 1.43 | 0.39 | 0 |
| n/a | n/a  |      | 0 n/a | n/a  |      | 0 |
|     | 0.85 | 0.22 | 1     | 1.05 | 0.29 | 0 |
|     | 1.63 | 0.23 | 1     | 0.91 | 0.44 | 0 |
|     | 0.81 | 0.12 | 1     | 0.93 | 0.14 | 0 |
|     | 0.98 | 0.13 | 1     | 0.83 | 0.51 | 0 |
|     | 2.17 | 0.22 | 0     | 1.02 | 0.27 | 0 |
|     | 1.92 | 0.82 | 1     | 1.22 | 0.34 | 0 |
|     | 1.02 | 0.41 | 0     | 1.01 | 0.24 | 0 |
|     | 0.59 | 0.07 | 1     | 0.79 | 0.1  | 0 |
|     | 4.01 | 0.53 | 1     | 1.26 | 0.21 | 0 |
|     | 0.08 | 0.02 | 1     | 0.79 | 0.13 | 1 |
|     | 0.74 | 0.12 | 1     | 1.46 | 0.33 | 1 |
|     | 0.29 | 0.06 | 1     | 0.93 | 0.26 | 1 |
|     |      |      | 1     | 1.21 | 0.2  | 0 |



|      |      |   |      |      |   |
|------|------|---|------|------|---|
| n/a  | n/a  | 0 | n/a  | n/a  | 0 |
| n/a  | n/a  | 0 | n/a  | n/a  | 0 |
| n/a  | n/a  | 0 | n/a  | n/a  | 0 |
|      |      | 1 | 1.05 | 0.18 | 0 |
| n/a  | n/a  | 0 | n/a  | n/a  | 0 |
| n/a  | n/a  | 0 | n/a  | n/a  | 0 |
| 0.98 | 0.18 | 1 | 0.88 | 0.21 | 0 |
| 1.58 | 0.43 | 0 | 0.83 | 0.22 | 0 |
| 1.9  | 0.34 | 0 | 0.92 | 0.23 | 0 |
| 0.33 | 0.07 | 1 | 0.84 | 0.28 | 1 |
| 2.28 | 0.51 | 0 | 0.96 | 0.16 | 0 |
| 1.74 | 0.06 | 0 | 0.82 | 0.23 | 0 |
| 0.7  | 0.05 | 1 | 1.37 | 0.22 | 0 |
| 1.54 | 0.47 | 0 | 0.88 | 0.17 | 0 |
| 0.31 | 0.07 | 1 | 0.78 | 0.4  | 1 |
| 1.11 | 0.41 | 0 | 1.12 | 0.46 | 0 |
| 1.79 | 0.26 | 1 | 1.16 | 0.24 | 0 |
| 1.68 | 0.39 | 0 | 1.06 | 0.15 | 0 |
| 1.57 | 0.44 | 0 | 1.09 | 0.13 | 0 |
| 1.57 | 0.16 | 1 | 3.03 | 0.72 | 0 |
| 2.4  | 0.48 | 0 | 0.83 | 0.31 | 0 |
| 1.72 | 0.64 | 0 | 0.91 | 0.11 | 0 |
| 1.13 | 0.08 | 0 | 1.04 | 0.09 | 0 |
| 1.84 | 0.38 | 0 | 1.04 | 0.21 | 0 |
| 1.48 | 0.38 | 0 | 0.93 | 0.35 | 0 |
| 1.26 | 0.61 | 0 | 0.95 | 0.15 | 0 |
| 1.88 | 0.29 | 0 | 0.88 | 0.35 | 0 |
| 1.63 | 0.5  | 0 | 1.11 | 0.37 | 0 |
| 1.35 | 0.3  | 0 | 1.06 | 0.19 | 0 |
| 1.54 | 0.35 | 0 | 1.01 | 0.13 | 0 |
| 1.7  | 0.27 | 0 | 1.35 | 0.44 | 0 |
| 1.31 | 0.42 | 0 | 0.75 | 0.17 | 0 |
| 0.4  | 0.11 | 1 | 0.68 | 0.28 | 1 |
| 1.42 | 0.01 | 1 | 1.16 | 0.29 | 0 |
| 1.95 | 0.31 | 0 | 0.92 | 0.29 | 0 |
| 1.61 | 0.26 | 0 | 0.98 | 0.21 | 0 |
| 1.69 | 0.32 | 1 | 0.94 | 0.27 | 0 |
| 1.68 | 0.31 | 0 | 0.85 | 0.26 | 0 |
| 1.72 | 0.15 | 1 | 0.9  | 0.16 | 0 |
| 1.38 | 0.56 | 0 | 0.9  | 0.19 | 0 |
| 1.77 | 0.55 | 0 | 0.9  | 0.12 | 0 |
| 2.31 | 0.44 | 0 | 0.92 | 0.17 | 0 |
| 1.32 | 0.38 | 0 | 0.93 | 0.27 | 0 |
| 1.16 | 0.09 | 1 | 0.98 | 0.52 | 0 |
| 0.97 | 0.06 | 0 | 1.11 | 0.41 | 0 |
| 2.04 | 0.4  | 0 | 1.13 | 0.21 | 0 |
| 2.21 | 0.09 | 0 | 0.92 | 0.21 | 0 |
|      |      | 0 | 0.89 | 0.18 | 0 |
|      |      | 0 | 0.88 | 0.29 | 0 |
| n/a  | n/a  | 0 | n/a  | n/a  | 0 |
| 1.11 | 0.17 | 1 | 2.28 | 0.85 | 0 |
| 1.15 | 0.27 | 0 | 0.82 | 0.24 | 0 |



|     |      |      |       |      |      |   |
|-----|------|------|-------|------|------|---|
|     | 1.04 | 0.56 | 0     | 1.23 | 0.44 | 0 |
|     | 1.58 | 0.19 | 0     | 0.92 | 0.19 | 0 |
| n/a | n/a  |      | 0 n/a | n/a  |      | 0 |
|     | 1.03 | 0.22 | 1     | 1.13 | 0.42 | 0 |
|     | 1.03 | 0.04 | 1     | 0.88 | 0.25 | 0 |
|     |      |      | 1     | 1.56 | 0.46 | 0 |
| n/a | n/a  |      | 0 n/a | n/a  |      | 0 |
|     | 0.39 | 0.05 | 1     | 1.07 | 0.22 | 0 |
|     | 0.98 | 0.06 | 1     | 0.81 | 0.2  | 0 |
|     | 0.37 | 0.05 | 1     | 1.07 | 0.3  | 0 |
|     | 1.17 | 0.04 | 0     | 0.69 | 0.12 | 0 |
|     | 1.52 | 0.21 | 0     | 0.8  | 0.19 | 0 |
|     | 1.8  | 0.38 | 0     | 1.02 | 0.31 | 0 |
| n/a | n/a  |      | 0 n/a | n/a  |      | 0 |
|     | 0.9  | 0.44 | 0     | 0.84 | 0.26 | 0 |
|     | 1.32 | 0.77 | 0 n/a | n/a  |      | 0 |
|     | 2.03 | 0.34 | 0     | 0.81 | 0.13 | 0 |
| n/a | n/a  |      | 0 n/a | n/a  |      | 0 |
|     | 0.96 | 0.27 | 1     | 1.11 | 0.26 | 0 |
|     | 1.99 | 0.91 | 0     | 0.98 | 0.23 | 0 |
|     | 1.23 | 0.03 | 0     | 0.83 | 0.17 | 0 |
|     | 1.42 | 0.13 | 0 n/a | n/a  |      | 0 |
|     | 1.62 | 0.33 | 0     | 1.12 | 0.22 | 0 |
|     | 1.28 | 0.38 | 0     | 0.91 | 0.47 | 0 |
|     | 0.51 | 0.11 | 1     | 0.95 | 0.47 | 0 |
|     | 1.68 | 0.11 | 0     | 0.86 | 0.2  | 0 |
|     | 1.79 | 0.2  | 0     | 1.06 | 0.18 | 0 |
|     |      |      | 0     | 0.94 | 0.13 | 0 |
|     | 1.55 | 0.32 | 0     | 0.99 | 0.17 | 0 |
|     | 0.35 | 0.18 | 1     | 1.57 | 0.36 | 1 |
|     | 1.08 | 0.32 | 0     | 1.21 | 0.33 | 0 |
|     | 1.59 | 0.14 | 0     | 0.81 | 0.55 | 0 |
|     | 1.54 | 0.77 | 0     | 0.79 | 0.16 | 0 |
| n/a | n/a  |      | 0 n/a | n/a  |      | 0 |
| n/a | n/a  |      | 0 n/a | n/a  |      | 0 |
|     | 0.59 | 0.04 | 1     | 0.87 | 0.22 | 0 |
|     | 1.71 | 0.33 | 0     | 0.81 | 0.13 | 0 |
|     | 1.21 | 0.3  | 0     | 0.9  | 0.31 | 0 |
|     | 2.01 | 0.16 | 0     | 0.87 | 0.38 | 0 |
|     | 0.16 | 0.04 | 1     | 0.79 | 0.1  | 1 |
|     | 0.97 | 0.1  | 1     | 1.2  | 0.36 | 0 |
|     | 0.46 | 0.03 | 1     | 1.49 | 0.16 | 1 |
|     | 0.34 | 0.05 | 1     | 0.78 | 0.14 | 0 |
| n/a | n/a  |      | 0 n/a | n/a  |      | 0 |
|     | 1.52 | 0.08 | 0     | 0.83 | 0.32 | 0 |
|     | 1.72 | 0.12 | 0     | 1.16 | 0.13 | 0 |
| n/a | n/a  |      | 0 n/a | n/a  |      | 0 |
| n/a | n/a  |      | 0 n/a | n/a  |      | 0 |
|     | 1.64 | 0.33 | 0     | 1.02 | 0.31 | 0 |
|     | 1.18 | 0.65 | 0     | 1.01 | 0.34 | 0 |
| n/a | n/a  |      | 0 n/a | n/a  |      | 0 |
|     | 1.27 | 0.02 | 1     | 1.14 | 0.1  | 0 |

|     |      |      |       |      |      |   |
|-----|------|------|-------|------|------|---|
|     | 1.87 | 0.18 | 1     | 0.78 | 0.38 | 0 |
|     | 1.37 | 0.14 | 0     | 0.8  | 0.41 | 0 |
|     | 1.3  | 0.33 | 0     | 0.96 | 0.5  | 0 |
|     | 1.42 | 0.04 | 0     | 0.93 | 0.2  | 0 |
|     | 1.37 | 0.23 | 0     | 0.9  | 0.29 | 0 |
| n/a | n/a  |      | 0 n/a | n/a  |      | 0 |
|     | 1.17 | 0.19 | 0     | 0.9  | 0.35 | 0 |
|     | 1.82 | 0.24 | 0     | 0.91 | 0.25 | 0 |
|     | 1.32 | 0.65 | 0     | 1.1  | 0.2  | 0 |
|     | 0.35 | 0.07 | 1     | 1.05 | 0.15 | 1 |
|     | 1.41 | 0.26 | 1     | 1.36 | 0.39 | 0 |
| n/a | n/a  |      | 0 n/a | n/a  |      | 0 |
|     | 1.43 | 0.51 | 0     | 0.93 | 0.15 | 0 |
|     | 1.15 | 0.09 | 0     | 0.97 | 0.21 | 0 |
|     | 1.56 | 0.34 | 0     | 0.93 | 0.25 | 0 |
|     |      |      | 1     | 0.83 | 0.2  | 0 |
|     | 2.07 | 0.36 | 0     | 1.11 | 0.14 | 0 |
|     | 1.51 | 0.35 | 1     | 0.85 | 0.2  | 0 |
|     | 0.29 | 0.04 | 1     | 0.24 | 0.11 | 1 |
|     |      |      | 0     | 0.8  | 0.36 | 0 |
|     | 1.02 | 0.13 | 0     | 1.04 | 0.27 | 0 |
|     | 1    | 0.03 | 0     | 0.92 | 0.13 | 0 |
|     | 0.63 | 0.05 | 1     | 0.94 | 0.33 | 0 |
|     | 0.32 | 0.06 | 1     | 0.73 | 0.1  | 1 |
|     | 1.78 | 0.19 | 0     | 0.85 | 0.34 | 0 |
|     | 1.61 | 0.4  | 0     | 1.05 | 0.47 | 0 |
|     | 1.35 | 0.19 | 0     | 1.06 | 0.19 | 0 |
|     | 1.75 | 0.32 | 0     | 1.03 | 0.3  | 0 |
|     | 1.2  | 0.14 | 0     | 0.9  | 0.37 | 0 |
|     | 1.29 | 0.12 | 0     | 0.87 | 0.15 | 0 |
|     | 0.85 | 0.26 | 1     | 0.98 | 0.12 | 0 |
|     | 0.35 | 0.17 | 1     | 0.8  | 0.21 | 0 |
|     | 0.7  | 0.07 | 1     | 0.99 | 0.17 | 0 |
|     | 1.42 | 2    | 0     | 0.87 | 0.29 | 0 |
|     | 1.49 | 0.47 | 0     | 1.08 | 0.18 | 0 |
|     | 0.04 | 0.01 | 1     | 0.76 | 0.11 | 1 |
|     | 1.46 | 0.47 | 0     | 1.03 | 0.22 | 0 |
|     | 1.92 | 0.37 | 0     | 0.88 | 0.3  | 0 |
|     |      |      | 1     | 0.79 | 0.15 | 1 |
|     | 1.3  | 0.25 | 0     | 0.83 | 0.18 | 0 |
|     |      |      | 1     | 1.07 | 0.28 | 0 |
|     | 1.46 | 0.59 | 0     | 0.95 | 0.2  | 0 |
| n/a | n/a  |      | 0 n/a | n/a  |      | 0 |
|     | 1.71 | 0.28 | 0     | 0.87 | 0.64 | 0 |
|     | 1.26 | 0.27 | 0     | 0.97 | 0.21 | 0 |
|     | 1.37 | 0.33 | 1     | 1.18 | 0.27 | 0 |
|     | 1.1  | 0.12 | 0     | 0.98 | 0.32 | 0 |
|     | 1.32 | 0.49 | 0     | 0.9  | 0.14 | 0 |
|     | 0.98 | 0.74 | 0     | 1.09 | 0.29 | 0 |
|     | 1.81 | 0.45 | 0     | 0.95 | 0.36 | 0 |
| n/a | n/a  |      | 0 n/a | n/a  |      | 0 |
|     | 1.18 | 0.46 | 1     | 1.03 | 0.2  | 0 |

|      |      |       |      |      |   |
|------|------|-------|------|------|---|
| 0.95 | 0.14 | 1     | 0.88 | 0.21 | 0 |
| 1.65 | 0.2  | 0     | 1.07 | 0.2  | 0 |
| 1.31 | 0.12 | 0     | 0.88 | 0.27 | 0 |
| 1.47 | 0.2  | 0     | 0.79 | 0.45 | 0 |
| 1.25 | 0.16 | 0     | 0.98 | 0.21 | 0 |
| 1.49 | 0.19 | 0     | 0.92 | 0.2  | 0 |
| 0.55 | 0.05 | 1     | 1.07 | 0.25 | 0 |
| 0.94 | 0.13 | 1     | 0.98 | 0.1  | 0 |
| 1.32 | 0.31 | 0     | 1.04 | 0.28 | 0 |
| 1.2  | 0.09 | 0     | 0.97 | 0.22 | 0 |
| 1.4  | 0.19 | 0     | 0.94 | 0.36 | 0 |
| 1.56 | 0.05 | 0     | 0.91 | 0.16 | 0 |
| 1.15 | 0.21 | 0     | 0.87 | 0.51 | 0 |
| 1.44 | 0.06 | 0     | 0.89 | 0.3  | 0 |
| 1.26 | 1.1  | 0     | 0.93 | 0.37 | 0 |
| 1.11 | 0.11 | 1     | 0.95 | 0.21 | 0 |
| 1.03 | 0.09 | 0     | 0.96 | 0.23 | 0 |
| 0.63 | 0.49 | 1     | 0.98 | 0.23 | 0 |
| 1.26 | 0.21 | 0     | 1.07 | 0.14 | 0 |
| 1.66 | 0.1  | 1     | 1.5  | 0.28 | 0 |
|      |      | 0     | 1.18 | 0.4  | 0 |
| 1.94 | 0.3  | 0     | 0.99 | 1.47 | 0 |
| 1.85 | 0.46 | 0     | 0.78 | 0.15 | 0 |
| 0.7  | 0.08 | 1     | 1    | 0.21 | 0 |
| 1.35 | 0.1  | 0     | 0.92 | 0.32 | 0 |
|      |      | 0     | 1.14 | 0.3  | 0 |
| 1.19 | 0.15 | 0     | 1.12 | 0.24 | 0 |
| 0.87 | 0.24 | 0     | 1.11 | 0.18 | 0 |
| 1.8  | 0.41 | 0     | 0.97 | 0.3  | 0 |
|      |      | 0     | 1.1  | 0.57 | 0 |
| 1.48 | 0.51 | 0     | 0.85 | 0.28 | 0 |
| 1.58 | 0.09 | 0     | 1.1  | 0.32 | 0 |
| 1.66 | 0.32 | 0 n/a | n/a  |      | 0 |
| 1.67 | 0.45 | 0     | 0.95 | 0.15 | 0 |
| 1.9  | 0.15 | 1     | 1.51 | 0.38 | 0 |
| 1.41 | 0.54 | 0     | 0.97 | 0.18 | 0 |
| 1.72 | 0.14 | 0     | 1.03 | 0.41 | 0 |
| 1.61 | 0.16 | 0     | 1.11 | 0.26 | 0 |
|      |      | 0     | 1.09 | 0.27 | 0 |
| 0.48 | 0.09 | 1     | 0.99 | 0.34 | 0 |
| 9.51 | 0.75 | 1     | 1.16 | 0.5  | 0 |
| 1.07 | 0.24 | 0     | 0.99 | 0.18 | 0 |
| 1.12 | 0.7  | 0     | 0.89 | 0.21 | 0 |
|      |      | 1     | 1.1  | 0.21 | 0 |
| 1.52 | 0.17 | 1     | 1.95 | 0.92 | 0 |
| 1.27 | 0.11 | 0     | 1.15 | 0.44 | 0 |
| 1    | 0.11 | 1     | 1.69 | 0.69 | 0 |
| 0.91 | 0.09 | 0     | 1.01 | 0.23 | 0 |
|      |      | 1     | 0.18 | 0.08 | 1 |
| 0.37 | 0.04 | 1     | 1.05 | 0.16 | 0 |
| 0.58 | 0.16 | 1     | 0.91 | 0.19 | 0 |
| 1.23 | 0.27 | 0     | 1.02 | 0.63 | 0 |

|     |      |      |       |      |      |   |
|-----|------|------|-------|------|------|---|
|     | 1.28 | 0.3  | 0     | 0.99 | 0.19 | 0 |
|     | 1.11 | 0.78 | 0     | 0.9  | 0.27 | 0 |
|     | 1.82 | 0.38 | 0     | 0.9  | 0.18 | 0 |
|     | 1.19 | 0.14 | 0     | 0.88 | 0.4  | 0 |
|     | 1.9  | 0.18 | 0     | 1.01 | 0.2  | 0 |
|     | 0.77 | 0.22 | 1     | 1.56 | 0.3  | 0 |
|     | 1.33 | 0.06 | 1     | 0.76 | 0.22 | 0 |
|     | 1.23 | 0.28 | 0     | 1.01 | 0.24 | 0 |
|     | 0.77 | 0.1  | 1     | 0.85 | 0.23 | 0 |
|     | 1.16 | 0.22 | 1     | 0.97 | 0.15 | 0 |
|     | 1.63 | 0.17 | 0     | 1.3  | 0.28 | 0 |
|     | 0.18 | 0.05 | 1     | 0.96 | 0.17 | 1 |
|     | 1.37 | 0.18 | 0     | 0.87 | 0.34 | 0 |
|     | 1.04 | 0.28 | 0     | 1.04 | 0.33 | 0 |
|     | 1.13 | 0.15 | 0     | 1.1  | 0.5  | 0 |
|     | 0.96 | 0.27 | 1     | 0.85 | 0.17 | 0 |
|     | 1.38 | 0.23 | 0     | 0.9  | 0.14 | 0 |
|     | 1.15 | 0.26 | 0     | 0.89 | 0.29 | 0 |
|     | 1.32 | 0.1  | 0     | 1.11 | 0.41 | 0 |
|     | 1.58 | 0.68 | 0     | 0.94 | 0.14 | 0 |
|     | 1.49 | 0.17 | 0     | 1.14 | 0.27 | 0 |
|     |      |      | 1     | 1.12 | 0.34 | 0 |
| n/a | n/a  |      | 0 n/a | n/a  |      | 0 |
|     | 1.82 | 0.36 | 0     | 0.95 | 0.17 | 0 |
|     | 0.71 | 0.05 | 1     | 0.94 | 0.22 | 0 |
|     | 1.65 | 0.26 | 0     | 0.88 | 0.21 | 0 |
|     | 1.02 | 0.18 | 0     | 1.18 | 0.29 | 0 |
|     | 1.08 | 0.26 | 0     | 0.89 | 0.33 | 0 |
| n/a | n/a  |      | 0 n/a | n/a  |      | 0 |
|     | 0.99 | 0.49 | 0     | 1.01 | 0.52 | 0 |
| n/a | n/a  |      | 0 n/a | n/a  |      | 0 |
|     | 1.19 | 0.2  | 0     | 1.2  | 0.17 | 0 |
|     | 0.18 | 0.02 | 1     | 0.76 | 0.21 | 1 |
|     | 1.81 | 0.5  | 0     | 0.84 | 0.2  | 0 |
|     | 0.63 | 0.25 | 1     | 1.02 | 0.38 | 0 |
|     | 1.12 | 0.09 | 0     | 1.03 | 0.18 | 0 |
|     | 1.08 | 0.18 | 0     | 1.1  | 0.36 | 0 |
|     | 0.97 | 0.83 | 0     | 0.89 | 0.46 | 0 |
|     | 1.07 | 0.06 | 0     | 1.04 | 0.43 | 0 |
|     | 0.94 | 0.47 | 0     | 0.96 | 0.21 | 0 |
| n/a | n/a  |      | 0 n/a | n/a  |      | 0 |
|     | 1.26 | 0.16 | 0     | 0.97 | 0.28 | 0 |
|     |      |      | 1     | 0.99 | 0.17 | 0 |
|     | 0.08 | 0.05 | 1     | 0.72 | 0.18 | 1 |
|     | 0.29 | 0.03 | 1     | 0.94 | 0.1  | 0 |
|     | 0.34 | 0.1  | 1     | 0.68 | 0.16 | 1 |
|     | 0.93 | 0.14 | 1     | 1.19 | 0.3  | 0 |
|     | 0.8  | 0.14 | 1     | 1.4  | 0.25 | 0 |
|     | 4.59 | 0.8  | 1     | 0.94 | 0.25 | 0 |
|     | 1.3  | 0.14 | 0     | 0.89 | 0.18 | 0 |
|     | 1.51 | 0.5  | 1     | 0.97 | 0.2  | 0 |
|     | 1.31 | 0.63 | 0     | 1.05 | 0.56 | 0 |

|     |      |       |       |      |      |   |
|-----|------|-------|-------|------|------|---|
|     | 1.02 | 0.56  | 0     | 0.88 | 0.28 | 0 |
| n/a | n/a  |       | 0 n/a | n/a  |      | 0 |
|     | 1.34 | 0.8   | 0     | 1.04 | 0.38 | 0 |
|     | 1.57 | 0.27  | 0     | 0.98 | 0.19 | 0 |
|     | 0.33 | 0.01  | 1     | 0.83 | 0.2  | 1 |
|     | 0.55 | 0.08  | 1     | 0.78 | 0.28 | 0 |
|     | 1.78 | 0.14  | 0     | 0.89 | 0.33 | 0 |
|     | 1.28 | 0.26  | 0     | 1.13 | 0.21 | 0 |
|     | 1.42 | 0.22  | 0     | 0.83 | 0.16 | 0 |
|     | 1.31 | 0.18  | 0     | 0.91 | 0.13 | 0 |
|     | 1.59 | 0.42  | 0     | 1.03 | 0.24 | 0 |
|     | 1.77 | 0.45  | 1     | 1.34 | 0.12 | 0 |
|     | 0.84 | 0.25  | 1     | 0.9  | 0.17 | 0 |
|     | 1.84 | 0.2   | 0     | 0.92 | 0.31 | 0 |
|     | 0.86 | 0.35  | 1     | 0.69 | 0.11 | 0 |
|     | 0.62 | 0.11  | 1     | 1.09 | 0.26 | 0 |
|     | 1.14 | 0.31  | 1     | 1.15 | 0.25 | 0 |
|     | 2.53 | 0.3   | 0     | 0.95 | 0.25 | 0 |
|     | 0.98 | 0.1   | 0     | 0.69 | 0.18 | 0 |
|     | 1.31 | 0.38  | 0     | 1.12 | 0.26 | 0 |
|     | 1.72 | 0.61  | 0     | 1.07 | 1.28 | 0 |
|     | 1.72 | 0.48  | 0     | 0.95 | 0.14 | 0 |
|     | 0.32 | 0.13  | 1     | 0.88 | 0.2  | 0 |
|     | 1.74 | 0.36  | 0     | 0.8  | 0.21 | 0 |
|     | 1.19 | 0.12  | 1     | 1.26 | 0.26 | 0 |
|     | 0.4  | 0.03  | 1     | 2.27 | 0.3  | 1 |
|     | 1.46 | 0.08  | 1     | 1.28 | 0.36 | 0 |
|     | 1.39 | 0.48  | 0     | 1.76 | 1    | 0 |
|     | 1.57 | 0.04  | 0     | 1.16 | 0.28 | 0 |
|     | 1.42 | 0.11  | 0 n/a | n/a  |      | 0 |
|     | 0.07 | 0.01  | 1     | 0.83 | 0.26 | 1 |
|     | 0.11 | 0.02  | 1     | 0.7  | 0.09 | 1 |
|     | 1.45 | 0.34  | 0     | 0.96 | 0.38 | 0 |
|     | 8.3  | 1.52  | 1     | 1.7  | 0.55 | 0 |
|     | 1.47 | 0.13  | 0     | 1.05 | 0.2  | 0 |
|     | 1.58 | 0.38  | 0     | 0.85 | 0.19 | 0 |
|     | 1.55 | 0.2   | 0     | 0.85 | 0.37 | 0 |
|     | 1.6  | 14.54 | 0     | 1.05 | 0.3  | 0 |
|     | 2.35 | 0.79  | 0 n/a | n/a  |      | 0 |
|     | 0.34 | 0.08  | 1     | 1.02 | 0.16 | 1 |
|     | 1.38 | 0.24  | 0     | 0.9  | 0.21 | 0 |
|     |      |       | 1     | 1.23 | 0.18 | 1 |
|     | 2.48 | 0.47  | 0     | 1.14 | 0.53 | 0 |
|     | 1.45 | 0.63  | 0     | 0.8  | 0.22 | 0 |
|     | 1.75 | 0.27  | 0     | 0.77 | 0.19 | 0 |
|     | 0.94 | 0.29  | 1     | 0.78 | 0.08 | 0 |
|     | 1.77 | 0.09  | 0     | 0.88 | 0.16 | 0 |
|     |      |       | 0     | 1    | 0.31 | 0 |
|     | 1    | 0.2   | 0     | 1.04 | 0.3  | 0 |
|     | 1.19 | 0.17  | 0     | 1.04 | 0.36 | 0 |
|     | 1.78 | 0.48  | 0     | 1.2  | 0.37 | 0 |
|     | 1.32 | 0.13  | 0     | 0.85 | 0.23 | 0 |



|     |       |      |   |       |      |   |
|-----|-------|------|---|-------|------|---|
|     | 1.17  | 0.28 | 0 | 0.74  | 0.12 | 0 |
|     | 1.4   | 0.22 | 0 | 0.76  | 0.24 | 0 |
|     | 0.92  | 0.18 | 0 | 0.95  | 0.21 | 0 |
|     | 18.48 | 5.56 | 1 | 12.98 | 4.17 | 1 |
|     | 1.77  | 0.42 | 0 | 1.26  | 0.23 | 0 |
|     | 1.51  | 0.17 | 0 | 1.01  | 0.23 | 0 |
|     | 1.4   | 0.27 | 0 | 1.04  | 0.45 | 0 |
|     | 2.55  | 4.05 | 0 | 1.09  | 0.08 | 0 |
|     | 1.58  | 0.52 | 0 | 0.91  | 0.25 | 0 |
|     | 1     | 0.29 | 0 | 0.91  | 0.14 | 0 |
|     | 1.2   | 0.08 | 0 | 1.07  | 0.44 | 0 |
|     | 2.8   | 0.4  | 1 | 0.87  | 0.18 | 0 |
| n/a | n/a   |      | 0 | n/a   | n/a  | 0 |
|     | 1.02  | 0.34 | 0 | 0.73  | 0.16 | 0 |
|     | 1.52  | 0.23 | 0 | 0.92  | 0.22 | 0 |
| n/a | n/a   |      | 0 | n/a   | n/a  | 0 |
|     | 1.13  | 0.26 | 0 | 0.76  | 0.31 | 0 |
|     | 1.1   | 0.07 | 1 | 0.91  | 0.25 | 0 |
|     | 0.6   | 0.16 | 1 | 0.73  | 0.14 | 0 |
|     | 0.4   | 0.04 | 1 | 0.84  | 0.34 | 0 |
|     | 1.21  | 0.19 | 0 | 0.99  | 0.18 | 0 |
| n/a | n/a   |      | 0 | n/a   | n/a  | 0 |
|     | 1.88  | 0.21 | 0 | 1.08  | 0.22 | 0 |
|     | 1.89  | 0.29 | 0 | 1.1   | 0.23 | 0 |
|     | 0.07  | 0.01 | 1 | 0.83  | 0.7  | 1 |
|     | 1.4   | 0.07 | 0 | 1.04  | 0.51 | 0 |
|     | 1.44  | 0.33 | 0 | 1.08  | 0.35 | 0 |
| n/a | n/a   |      | 0 | n/a   | n/a  | 0 |
|     | 1.21  | 0.33 | 0 | 1.09  | 0.14 | 0 |
|     | 0.82  | 0.11 | 1 | 0.82  | 1.56 | 0 |
|     | 1.51  | 0.25 | 1 | 0.74  | 0.11 | 0 |
|     | 1.07  | 0.24 | 0 | 0.9   | 0.15 | 0 |
|     | 2.13  | 0.41 | 0 | 1.13  | 0.19 | 0 |
| n/a | n/a   |      | 0 | n/a   | n/a  | 0 |
|     | 1.48  | 0.39 | 0 | 0.9   | 0.44 | 0 |
|     | 0.75  | 0.44 | 1 | 0.96  | 0.2  | 0 |
|     | 2.07  | 0.14 | 0 | 0.97  | 0.25 | 0 |
|     | 1.74  | 0.43 | 0 | 0.98  | 0.35 | 0 |
|     |       |      | 1 | 1.36  | 0.3  | 0 |
|     | 2.41  | 0.16 | 0 | 1.2   | 0.33 | 0 |
|     | 2.3   | 0.28 | 0 | n/a   | n/a  | 0 |
| n/a | n/a   |      | 0 | n/a   | n/a  | 0 |
| n/a | n/a   |      | 0 | n/a   | n/a  | 0 |
| n/a | n/a   |      | 0 | n/a   | n/a  | 0 |
|     | 1.95  | 0.51 | 0 | 1.05  | 0.23 | 0 |
|     | 2.01  | 0.32 | 0 | 1     | 0.24 | 0 |
| n/a | n/a   |      | 0 | n/a   | n/a  | 0 |
| n/a | n/a   |      | 0 | n/a   | n/a  | 0 |
|     | 1.2   | 0.19 | 1 | 0.89  | 0.29 | 0 |
|     | 1     | 0.14 | 1 | 0.9   | 0.43 | 0 |
| n/a | n/a   |      | 0 | n/a   | n/a  | 0 |
|     | 0.51  | 0.12 | 1 | 0.96  | 0.41 | 0 |

|     |      |       |   |      |      |   |
|-----|------|-------|---|------|------|---|
|     | 1.08 | 0.28  | 0 | 0.89 | 0.3  | 0 |
| n/a | n/a  |       | 0 | n/a  | n/a  | 0 |
| n/a | n/a  |       | 0 | n/a  | n/a  | 0 |
|     | 1.74 | 0.6   | 0 | 1.04 | 0.36 | 0 |
|     | 1.8  | 0.37  | 0 | 0.97 | 0.38 | 0 |
|     | 1.01 | 0.87  | 0 | 1.25 | 0.27 | 0 |
|     |      |       | 1 | 1.46 | 0.54 | 0 |
|     | 2.09 | 0.21  | 0 | 1.05 | 0.52 | 0 |
| n/a | n/a  |       | 0 | n/a  | n/a  | 0 |
| n/a | n/a  |       | 0 | n/a  | n/a  | 0 |
|     | 2    | 0.35  | 0 | 1.07 | 0.29 | 0 |
|     | 1.31 | 0.46  | 0 | 0.97 | 0.3  | 0 |
|     | 0.45 | 0.16  | 1 | 0.81 | 0.15 | 0 |
|     | 1.32 | 0.45  | 0 | 0.84 | 0.31 | 0 |
|     | 1.54 | 0.14  | 0 | 1.23 | 0.23 | 0 |
|     | 1.58 | 0.38  | 0 | 0.97 | 0.26 | 0 |
|     |      |       | 1 | 0.67 | 0.15 | 0 |
|     | 0.96 | 0.06  | 1 | 1.69 | 0.58 | 0 |
|     | 2    | 0.4   | 0 | 0.87 | 0.18 | 0 |
|     | 1.75 | 0.24  | 0 | 1    | 0.18 | 0 |
|     | 1.72 | 0.16  | 0 | 0.81 | 0.46 | 0 |
|     | 1.36 | 0.15  | 0 | 0.87 | 0.15 | 0 |
|     | 1.47 | 0.28  | 0 | 0.84 | 0.24 | 0 |
|     | 1.38 | 0.96  | 0 | 1.09 | 0.41 | 0 |
|     | 1.93 | 0.69  | 0 | 0.98 | 0.27 | 0 |
|     | 1.59 | 0.22  | 0 | 0.98 | 0.26 | 0 |
|     | 1.66 | 19.42 | 0 | 0.92 | 0.12 | 0 |
|     | 1.52 | 0.35  | 0 | 1.08 | 0.34 | 0 |
|     | 1.23 | 0.11  | 0 | 0.96 | 0.23 | 0 |
|     | 1.47 | 0.13  | 0 | 0.81 | 0.28 | 0 |
|     | 0.1  | 0.03  | 1 | 0.67 | 0.5  | 1 |
|     | 1.82 | 0.41  | 0 | 0.86 | 0.26 | 0 |
|     | 2.38 | 0.35  | 0 | 0.97 | 0.38 | 0 |
|     |      |       | 1 | 0.75 | 0.63 | 1 |
|     | 2.26 | 0.37  | 0 | 0.86 | 0.16 | 0 |
|     | 1.52 | 0.24  | 0 | 0.99 | 0.13 | 0 |
|     | 1.22 | 0.17  | 0 | 1.11 | 0.24 | 0 |
|     | 1.54 | 0.29  | 0 | 0.78 | 0.32 | 0 |
| n/a | n/a  |       | 0 | n/a  | n/a  | 0 |
|     | 1.28 | 0.16  | 1 | 0.96 | 0.25 | 0 |
|     | 1.49 | 0.27  | 0 | 0.98 | 0.2  | 0 |
|     | 3.78 | 1.89  | 0 | 0.79 | 0.52 | 0 |
|     | 1.4  | 0.36  | 0 | 0.99 | 0.21 | 0 |
|     | 1.94 | 0.25  | 0 | 1.56 | 0.54 | 0 |
|     | 0.36 | 0.05  | 1 | 0.9  | 0.4  | 0 |
|     | 1.06 | 0.07  | 0 | 0.98 | 0.41 | 0 |
|     | 1.14 | 0.39  | 0 | 0.88 | 0.35 | 0 |
|     | 0.78 | 0.05  | 1 | 0.9  | 0.13 | 0 |
|     | 1.6  | 0.27  | 0 | 0.92 | 0.14 | 0 |
|     | 0.53 | 0.16  | 1 | 0.87 | 0.17 | 0 |
|     | 2    | 0.39  | 0 | 1    | 0.19 | 0 |
|     | 1.6  | 0.34  | 1 | 0.75 | 0.3  | 0 |



|     |      |      |     |      |      |
|-----|------|------|-----|------|------|
| n/a |      | 0    | n/a |      | 0    |
| n/a | n/a  | 0    | n/a | n/a  | 0    |
|     | 1.55 | 0.49 | 0   | 0.96 | 0.18 |
|     | 0.78 | 0.07 | 1   | 1.02 | 0.25 |
|     | 1.64 | 0.53 | 0   | 1.03 | 0.2  |
|     | 1.37 | 0.47 | 0   | 0.87 | 0.27 |
|     | 1.9  | 0.23 | 0   | 1.02 | 0.11 |
|     |      |      | 0   | 1    | 0.32 |
|     | 0.65 | 0.21 | 1   | 1.62 | 0.5  |
|     | 0.88 | 0.22 | 1   | 0.97 | 0.22 |
|     | 0.79 | 1.18 | 1   | 1.2  | 0.28 |
|     |      |      | 0   | 1.21 | 0.11 |
|     | 1.44 | 0.28 | 0   | 1.5  | 0.44 |
|     | 1.5  | 0.17 | 0   | 0.86 | 0.27 |
|     | 1.33 | 0.32 | 0   | 0.91 | 0.14 |
|     | 1.08 | 0.06 | 1   | 1.01 | 0.18 |
|     | 1.48 | 0.5  | 0   | 0.92 | 0.17 |
|     | 1.19 | 0.2  | 0   | 1    | 0.27 |
|     | 1.12 | 1.31 | 0   | 0.82 | 0.55 |
|     | 0.45 | 0.14 | 1   | 0.86 | 0.66 |
|     | 1.34 | 0.13 | 0   | 1.1  | 0.16 |
|     | 0.1  | 0.02 | 1   | 1.09 | 0.45 |
|     | 1.66 | 0.6  | 0   | 0.95 | 0.12 |
|     | 1.05 | 0.24 | 1   | 0.88 | 0.21 |
|     | 2.31 | 0.37 | 0   | 0.89 | 0.44 |
|     | 0.64 | 0.2  | 1   | 1.06 | 0.29 |
|     | 1.05 | 0.22 | 1   | 1.08 | 0.43 |
|     | 1.24 | 0.24 | 1   | 1.18 | 0.32 |
|     | 1.51 | 0.12 | 0   | 0.98 | 0.54 |
|     | 1.19 | 0.2  | 0   | 1.04 | 0.24 |
|     | 1.42 | 0.21 | 0   | 1.03 | 0.14 |
|     | 2.12 | 0.75 | 0   | 0.94 | 0.36 |
|     | 1.93 | 0.45 | 0   | 0.89 | 0.05 |
|     | 1.93 | 0.61 | 0   | 0.75 | 0.12 |
|     | 1.96 | 0.46 | 0   | 0.84 | 0.25 |
|     | 1.29 | 0.33 | 0   | 1.2  | 0.33 |
|     |      |      | 0   | 1.02 | 0.31 |
|     | 1.99 | 0.92 | 0   | 0.93 | 0.35 |
|     | 1.11 | 0.05 | 1   | 1.13 | 0.11 |
|     | 0.37 | 0.13 | 1   | 0.91 | 0.38 |
|     | 1.53 | 0.08 | 0   | 0.8  | 0.21 |
|     |      |      | 0   | 0.89 | 0.2  |
|     | 1.49 | 0.26 | 0   | 0.73 | 0.38 |
|     | 0.32 | 0.03 | 1   | 0.93 | 0.47 |
|     | 1.83 | 0.41 | 0   | 1.31 | 0.35 |
|     | 0.91 | 0.19 | 1   | 1.17 | 0.18 |
|     | 3.39 | 0.89 | 1   | 1.01 | 0.22 |
|     | 1.5  | 0.22 | 0   | 1.1  | 0.44 |
|     | 1.62 | 0.34 | 0   | 1.03 | 0.37 |
|     | 0.7  | 0.09 | 1   | 0.89 | 0.6  |
|     | 1.27 | 0.14 | 1   | 1.36 | 0.32 |
|     | 0.54 | 0.07 | 1   | 0.97 | 0.35 |

|     |       |      |       |      |      |   |
|-----|-------|------|-------|------|------|---|
|     | 0.25  | 0.04 | 1     | 0.89 | 0.81 | 1 |
|     | 1.23  | 0.62 | 0     | 0.92 | 0.24 | 0 |
|     |       |      | 0     | 0.86 | 0.24 | 0 |
|     | 2.02  | 0.21 | 0     | 0.88 | 0.22 | 0 |
|     | 0.26  | 0.04 | 1     | 0.98 | 0.24 | 0 |
|     | 0.45  | 0.12 | 1     | 1.18 | 0.31 | 1 |
|     | 1.57  | 0.15 | 0     | 0.87 | 0.19 | 0 |
|     | 0.91  | 0.16 | 0     | 0.8  | 0.24 | 0 |
|     | 0.94  | 0.3  | 1     | 1.05 | 0.14 | 0 |
|     | 1.38  | 0.18 | 0     | 1.12 | 0.2  | 0 |
|     | 10.58 | 3.32 | 1     | 1.33 | 0.39 | 0 |
|     | 0.08  | 0.02 | 1     | 0.99 | 0.23 | 1 |
|     | 0.72  | 0.01 | 0     | 1.11 | 0.36 | 0 |
|     |       |      | 0     | 1.03 | 0.75 | 0 |
|     | 1.52  | 0.63 | 0     | 1.3  | 0.47 | 0 |
|     | 1.63  | 0.16 | 0     | 1    | 0.37 | 0 |
|     | 1.26  | 0.14 | 1     | 0.84 | 0.16 | 0 |
|     | 1.6   | 0.42 | 0     | 0.82 | 0.23 | 0 |
| n/a | n/a   |      | 0 n/a | n/a  |      | 0 |
|     | 2.49  | 0.38 | 0     | 1.06 | 0.17 | 0 |
|     | 1.74  | 0.55 | 1     | 1.32 | 0.26 | 0 |
|     | 1.17  | 0.57 | 0     | 0.74 | 0.2  | 0 |
|     | 1.75  | 0.36 | 0     | 0.95 | 0.13 | 0 |
|     | 2.14  | 0.57 | 0     | 1.14 | 0.41 | 0 |
|     | 1.56  | 0.35 | 0     | 0.92 | 0.19 | 0 |
|     |       |      | 0     | 1.1  | 0.07 | 0 |
|     | 1.1   | 0.18 | 1     | 0.99 | 0.12 | 0 |
|     | 2.49  | 0.38 | 0     | 0.94 | 0.35 | 0 |
|     | 1.81  | 0.12 | 0     | 1.23 | 0.3  | 0 |
|     | 0.69  | 0.12 | 1     | 0.98 | 0.28 | 0 |
|     |       |      | 0     | 1.01 | 0.26 | 0 |
|     | 1.81  | 0.66 | 0     | 1.05 | 0.37 | 0 |
|     | 1.43  | 0.33 | 0     | 0.91 | 0.21 | 0 |
|     | 1.13  | 0.11 | 1     | 1.15 | 0.25 | 0 |
|     | 2.35  | 0.36 | 1     | 1.26 | 0.25 | 0 |
| n/a | n/a   |      | 0 n/a | n/a  |      | 0 |
|     |       |      | 1     | 1    | 0.22 | 0 |
|     | 0.93  | 0.04 | 1     | 1.44 | 0.2  | 0 |
|     | 1.92  | 0.42 | 0     | 1.02 | 0.14 | 0 |
|     | 1.98  | 0.33 | 0     | 0.74 | 0.22 | 0 |
|     | 1.66  | 0.5  | 0     | 0.82 | 0.33 | 0 |
|     | 1.69  | 0.23 | 0     | 0.89 | 0.18 | 0 |
| n/a | n/a   |      | 0 n/a | n/a  |      | 0 |
|     | 1.31  | 0.16 | 1     | 0.89 | 0.16 | 0 |
|     | 1.37  | 0.29 | 0     | 0.87 | 0.14 | 0 |
|     | 2.06  | 0.47 | 0     | 1.41 | 0.52 | 0 |
|     | 1.94  | 0.77 | 0     | 0.99 | 0.15 | 0 |
|     | 1.91  | 0.71 | 0     | 0.85 | 0.18 | 0 |
|     | 1.04  | 0.26 | 0     | 1.35 | 0.24 | 0 |
|     | 1.52  | 0.26 | 0     | 0.99 | 0.34 | 0 |
|     | 1.41  | 0.15 | 0     | 1.05 | 0.2  | 0 |
|     | 1.25  | 0.3  | 0     | 0.94 | 0.3  | 0 |

|       |      |       |      |      |   |
|-------|------|-------|------|------|---|
| 1.87  | 0.73 | 0     | 0.9  | 0.12 | 0 |
| 1.36  | 0.14 | 0     | 1.05 | 0.18 | 0 |
| 1.62  | 0.44 | 0     | 0.87 | 0.3  | 0 |
| 2.17  | 0.27 | 0     | 0.8  | 0.21 | 0 |
| 1.4   | 0.25 | 0     | 0.95 | 0.31 | 0 |
| 1.5   | 0.28 | 0     | 0.88 | 0.21 | 0 |
|       |      | 0     | 0.91 | 0.69 | 0 |
| 2.35  | 1.2  | 0     | 0.92 | 0.2  | 0 |
| 2.1   | 0.83 | 0     | 0.81 | 0.38 | 0 |
| 1.39  | 0.63 | 0     | 0.9  | 0.16 | 0 |
| 0.12  | 0.01 | 1     | 0.63 | 0.32 | 1 |
| 1.72  | 0.18 | 0     | 1.18 | 0.36 | 0 |
|       |      | 1     | 0.98 | 0.42 | 0 |
| 1.66  | 0.67 | 0     | 1.19 | 1.42 | 0 |
| 0.97  | 0.13 | 0     | 1.08 | 0.24 | 0 |
| 1.42  | 0.43 | 0     | 0.94 | 0.09 | 0 |
| 0.77  | 0.09 | 1     | 1.06 | 0.27 | 0 |
| 1.89  | 0.25 | 0     | 0.88 | 0.09 | 0 |
| 1.64  | 0.43 | 0     | 0.87 | 0.4  | 0 |
|       |      | 1     | 1    | 0.22 | 0 |
| 1.1   | 0.18 | 1     | 0.77 | 0.37 | 0 |
| 1.48  | 0.07 | 0     | 1.01 | 0.26 | 0 |
| 1.13  | 0.15 | 1     | 0.96 | 0.17 | 0 |
|       |      | 0     | 0.96 | 0.14 | 0 |
| 1.44  | 0.38 | 1     | 0.97 | 0.3  | 0 |
| 1.82  | 0.62 | 0     | 0.94 | 0.28 | 0 |
| 1.4   | 0.03 | 0     | 1    | 0.17 | 0 |
| 0.95  | 0.09 | 1     | 0.99 | 0.5  | 0 |
| 1.25  | 0.77 | 0     | 0.95 | 0.27 | 0 |
| 1.34  | 0.42 | 0     | 1.03 | 0.2  | 0 |
| 1.96  | 1.01 | 0     | 1.01 | 0.29 | 0 |
| 1.7   | 0.45 | 0     | 1.19 | 0.51 | 0 |
| n/a   | n/a  | 0 n/a | n/a  | n/a  | 0 |
| 1.46  | 0.35 | 0     | 1.17 | 1.58 | 0 |
| n/a   | n/a  | 0 n/a | n/a  | n/a  | 0 |
| n/a   | n/a  | 0 n/a | n/a  | n/a  | 0 |
| n/a   | n/a  | 0 n/a | n/a  | n/a  | 0 |
| 1.53  | 1.23 | 0     | 1.18 | 0.4  | 0 |
| 1     | 0.29 | 1     | 1.16 | 0.19 | 0 |
| 0.78  | 0.14 | 1     | 0.93 | 0.13 | 0 |
| n/a   | n/a  | 0 n/a | n/a  | n/a  | 0 |
| 1.4   | 0.03 | 0     | 0.89 | 4.71 | 0 |
| n/a   | n/a  | 0 n/a | n/a  | n/a  | 0 |
| 1.06  | 0.17 | 1     | 1.06 | 0.88 | 0 |
| n/a   | n/a  | 0 n/a | n/a  | n/a  | 0 |
| 0.34  | 0.09 | 1     | 0.62 | 0.46 | 1 |
| n/a   | n/a  | 0 n/a | n/a  | n/a  | 0 |
| 2.22  | 0.88 | 0     | 1.06 | 0.35 | 0 |
| 15.07 | 5.47 | 1     | 2.49 | 0.76 | 0 |
| 2.27  | 0.64 | 0     | 1.15 | 0.29 | 0 |
|       |      | 0     | 1.25 | 0.22 | 0 |
| 0.73  | 0.16 | 1     | 1.93 | 0.39 | 0 |

|     |      |      |       |      |      |   |
|-----|------|------|-------|------|------|---|
|     | 1.58 | 0.2  | 0     | 0.77 | 0.12 | 0 |
|     | 1.61 | 0.23 | 0     | 0.99 | 0.2  | 0 |
|     | 1.88 | 0.3  | 0     | 1.03 | 0.14 | 0 |
|     | 0.68 | 0.11 | 1     | 0.83 | 0.24 | 0 |
|     | 1.25 | 1.43 | 0     | 0.95 | 0.19 | 0 |
|     | 1.43 | 0.83 | 0     | 0.79 | 0.27 | 0 |
|     | 1.38 | 0.26 | 0     | 0.91 | 0.32 | 0 |
|     | 1.78 | 0.47 | 0     | 0.91 | 0.16 | 0 |
|     | 1.44 | 0.21 | 0     | 1.22 | 0.35 | 0 |
|     | 1.56 | 0.69 | 0     | 0.85 | 0.32 | 0 |
|     | 0.25 | 0.05 | 1     | 0.61 | 0.19 | 1 |
|     | 1.58 | 0.17 | 1     | 0.81 | 0.26 | 0 |
|     | 1.46 | 0.19 | 0     | 0.95 | 0.39 | 0 |
| n/a | n/a  |      | 0 n/a | n/a  |      | 0 |
| n/a | n/a  |      | 0 n/a | n/a  |      | 0 |
| n/a | n/a  |      | 0 n/a | n/a  |      | 0 |
| n/a | n/a  |      | 0 n/a | n/a  |      | 0 |
| n/a | n/a  |      | 0 n/a | n/a  |      | 0 |
| n/a | n/a  |      | 0 n/a | n/a  |      | 0 |
| n/a | n/a  |      | 0 n/a | n/a  |      | 0 |
| n/a | n/a  |      | 0 n/a | n/a  |      | 0 |
| n/a | n/a  |      | 0 n/a | n/a  |      | 0 |
| n/a | n/a  |      | 0 n/a | n/a  |      | 0 |
| n/a | n/a  |      | 0 n/a | n/a  |      | 0 |
| n/a | n/a  |      | 0 n/a | n/a  |      | 0 |
| n/a | n/a  |      | 0 n/a | n/a  |      | 0 |
| n/a | n/a  |      | 0 n/a | n/a  |      | 0 |
| n/a | n/a  |      | 0 n/a | n/a  |      | 0 |
| n/a | n/a  |      | 0 n/a | n/a  |      | 0 |
| n/a | n/a  |      | 0 n/a | n/a  |      | 0 |
|     | 3.36 | 0.54 | 1     | 0.97 | 0.16 | 0 |
|     | 0.43 | 0.05 | 1     | 1.09 | 0.59 | 1 |
| n/a | n/a  |      | 0 n/a | n/a  |      | 0 |
|     | 1.47 | 1.45 | 0     | 1.17 | 0.24 | 0 |
|     | 2.88 | 0.53 | 0     | 0.97 | 0.57 | 0 |
|     | 1.61 | 0.17 | 0     | 1.04 | 0.14 | 0 |
|     | 0.78 | 0.1  | 1     | 1.06 | 0.74 | 1 |
|     | 1.6  | 0.18 | 0     | 1.04 | 0.43 | 0 |
|     | 1.71 | 0.48 | 0     | 0.86 | 0.12 | 0 |
|     | 1.91 | 0.65 | 0     | 1.19 | 0.32 | 0 |
|     | 1.72 | 0.37 | 0     | 0.92 | 0.29 | 0 |
|     | 0.19 | 0.2  | 1     | 0.6  | 0.36 | 1 |
|     | 1.25 | 0.35 | 0     | 1.08 | 0.17 | 0 |
|     | 2.02 | 0.46 | 0     | 0.86 | 0.32 | 0 |
|     | 1.6  | 0.61 | 0     | 1.03 | 0.28 | 0 |
|     | 1.59 | 0.22 | 0     | 1.76 | 0.51 | 0 |
|     | 1.65 | 0.11 | 0     | 0.84 | 0.18 | 0 |
|     | 1.94 | 0.43 | 0     | 0.84 | 0.3  | 0 |
|     | 1.12 | 0.44 | 0     | 0.99 | 1.24 | 0 |
|     | 2.32 | 0.45 | 0     | 0.88 | 0.19 | 0 |
|     | 1.13 | 0.1  | 0     | 0.78 | 0.25 | 0 |
|     | 1.62 | 0.3  | 0     | 1.15 | 0.36 | 0 |
|     | 1.92 | 0.11 | 0     | 1.03 | 0.21 | 0 |
|     | 1.51 | 0.67 | 0     | 1.1  | 0.35 | 0 |

|     |      |      |   |      |      |   |
|-----|------|------|---|------|------|---|
|     | 1.67 | 0.12 | 0 | 0.95 | 0.2  | 0 |
|     | 2.55 | 0.39 | 0 | 0.97 | 0.14 | 0 |
|     | 1.46 | 0.13 | 0 | 1.05 | 0.13 | 0 |
|     | 1.82 | 0.22 | 0 | 0.99 | 0.26 | 0 |
|     | 2.27 | 0.78 | 0 | 0.84 | 0.13 | 0 |
|     | 1.17 | 0.93 | 0 | 0.9  | 0.4  | 0 |
|     | 2.17 | 0.69 | 0 | 1.06 | 0.26 | 0 |
|     | 1.86 | 0.47 | 0 | 0.8  | 0.27 | 0 |
|     | 1.65 | 0.37 | 0 | 0.92 | 0.14 | 0 |
|     | 1.27 | 0.4  | 0 | 0.92 | 0.17 | 0 |
| n/a | n/a  |      | 0 | n/a  | n/a  | 0 |
| n/a | n/a  |      | 0 | n/a  | n/a  | 0 |
| n/a | n/a  |      | 0 | n/a  | n/a  | 0 |
| n/a | n/a  |      | 0 | n/a  | n/a  | 0 |
| n/a | n/a  |      | 0 | n/a  | n/a  | 0 |
|     | 1.44 | 1.01 | 0 | 0.82 | 0.18 | 0 |
|     | 1.3  | 0.21 | 0 | 0.85 | 0.16 | 0 |
|     | 2.29 | 0.32 | 0 | 0.88 | 0.19 | 0 |
|     | 1.38 | 0.65 | 0 | 0.88 | 0.21 | 0 |
|     | 1.37 | 0.09 | 1 | 0.9  | 0.53 | 0 |
|     | 1.59 | 0.23 | 0 | 0.86 | 0.14 | 0 |
|     | 1.51 | 0.35 | 0 | 0.95 | 0.19 | 0 |
|     | 2.73 | 0.68 | 0 | 0.86 | 0.28 | 0 |
|     | 1.87 | 0.31 | 0 | 0.85 | 0.25 | 0 |
|     | 1.32 | 0.3  | 0 | 0.82 | 0.14 | 0 |
|     | 0.7  | 0.07 | 1 | 0.85 | 0.27 | 0 |
|     |      |      | 0 | 0.88 | 0.19 | 0 |
|     | 2.33 | 0.76 | 0 | 0.98 | 0.25 | 0 |
|     |      |      | 0 | 0.87 | 0.09 | 0 |
|     | 1.76 | 0.48 | 0 | 1.44 | 0.36 | 0 |
|     | 0.45 | 0.07 | 1 | 0.9  | 0.19 | 0 |
|     | 1.6  | 0.32 | 0 | 1.09 | 0.12 | 0 |
|     | 1.69 | 0.12 | 1 | 1.02 | 0.1  | 0 |
| n/a | n/a  |      | 0 | n/a  | n/a  | 0 |
|     | 1.56 | 0.26 | 1 | 1.16 | 0.31 | 0 |
|     | 2.41 | 1.05 | 0 | 0.8  | 0.17 | 0 |
|     | 1.4  | 0.97 | 1 | 0.78 | 0.1  | 0 |
|     | 1.38 | 0.14 | 1 | 1.26 | 0.33 | 0 |
|     | 1.31 | 0.14 | 0 | 0.81 | 0.88 | 0 |
|     | 1.92 | 0.33 | 0 | 0.88 | 0.14 | 0 |
|     | 0.32 | 0.06 | 1 | 1.08 | 0.25 | 0 |
|     | 1.67 | 0.24 | 0 | 0.9  | 0.06 | 0 |
| n/a | n/a  |      | 0 | n/a  | n/a  | 0 |
|     | 1.59 | 0.72 | 0 | 0.84 | 0.21 | 0 |
|     |      |      | 1 | 1.15 | 0.3  | 0 |
|     | 1.65 | 0.27 | 0 | 0.77 | 0.28 | 0 |
|     | 1.71 | 0.38 | 0 | 1.03 | 0.3  | 0 |
| n/a | n/a  |      | 0 | n/a  | n/a  | 0 |
|     | 1.11 | 0.36 | 0 | 1.2  | 0.22 | 0 |
| n/a | n/a  |      | 0 | n/a  | n/a  | 0 |
| n/a | n/a  |      | 0 | n/a  | n/a  | 0 |
|     | 1.25 | 0.08 | 0 | 0.91 | 2.99 | 0 |

|      |      |       |      |      |   |
|------|------|-------|------|------|---|
|      |      | 0     | 1.08 | 0.22 | 0 |
| 1.71 | 0.56 | 0     | 0.81 | 0.13 | 0 |
| 2.16 | 0.2  | 0 n/a | n/a  |      | 0 |
| 1.55 | 0.2  | 0     | 1.13 | 0.3  | 0 |
|      |      | 0     | 0.98 | 0.28 | 0 |
| 1.49 | 0.27 | 0     | 1.02 | 0.27 | 0 |
| 2.44 | 0.59 | 0     | 0.72 | 0.12 | 0 |
| 1.52 | 0.42 | 0     | 0.85 | 0.27 | 0 |
| 1.56 | 0.59 | 0     | 0.91 | 2.11 | 0 |
| 0.25 | 0.03 | 1     | 1.06 | 0.47 | 1 |
| 2.01 | 0.44 | 0     | 0.97 | 0.18 | 0 |
| 2.2  | 0.29 | 0     | 0.76 | 0.18 | 0 |
| 1.35 | 0.48 | 0     | 1    | 0.46 | 0 |
| 2.17 | 0.12 | 0     | 1.14 | 0.37 | 0 |
| 2.32 | 0.83 | 0     | 0.92 | 0.12 | 0 |
| 2.19 | 0.14 | 0     | 0.93 | 0.14 | 0 |
| 2.42 | 0.62 | 0     | 0.97 | 0.58 | 0 |
| 0.95 | 0.2  | 1     | 0.87 | 0.14 | 0 |
| 0.42 | 0    | 1     | 1.12 | 0.29 | 0 |
| 1.59 | 0.44 | 0     | 0.92 | 0.24 | 0 |
| 1.31 | 1.03 | 0     | 1.07 | 0.27 | 0 |
| 0.74 | 0.07 | 1     | 0.67 | 0.17 | 0 |
| 1.12 | 0.58 | 0     | 0.77 | 0.21 | 0 |
| 1.51 | 0.36 | 0     | 0.8  | 0.61 | 0 |
| n/a  | n/a  | 0 n/a | n/a  |      | 0 |
| 1.73 | 0.31 | 0     | 1.08 | 0.42 | 0 |
| 1.93 | 0.22 | 0     | 0.89 | 0.21 | 0 |
| 2.18 | 0.07 | 0     | 0.7  | 0.27 | 0 |
| 2.4  | 0.44 | 0     | 0.82 | 0.4  | 0 |
| 4.33 | 2.95 | 1     | 5    | 2.07 | 1 |
| 6.61 | 0.24 | 1     | 2.61 | 0.96 | 0 |
| 1.74 | 0.24 | 1     | 0.85 | 0.32 | 0 |
|      |      | 0     | 1.07 | 0.34 | 0 |
| n/a  | n/a  | 0 n/a | n/a  |      | 0 |
| 1.83 | 0.37 | 0     | 0.92 | 0.17 | 0 |
|      |      | 1     | 1.05 | 0.23 | 0 |
| n/a  | n/a  | 0 n/a | n/a  |      | 0 |
| 0.67 | 0.07 | 1     | 1.02 | 0.23 | 0 |
| n/a  | n/a  | 0 n/a | n/a  |      | 0 |
| n/a  | n/a  | 0 n/a | n/a  |      | 0 |
| 1.63 | 0.25 | 0     | 1.01 | 0.24 | 0 |
| 1.14 | 0.37 | 0     | 0.93 | 0.19 | 0 |
|      |      | 0     | 1.16 | 0.34 | 0 |
| 1.51 | 0.35 | 0     | 0.91 | 0.34 | 0 |
| 2.14 | 0.61 | 0     | 0.83 | 0.1  | 0 |
| 2.01 | 0.81 | 0     | 0.83 | 0.26 | 0 |
| 1.49 | 0.27 | 0     | 1.22 | 0.25 | 0 |
|      |      | 0     | 1.38 | 0.66 | 0 |
| 1.89 | 0.4  | 0     | 1.18 | 0.42 | 0 |
| 1.81 | 0.47 | 0     | 1.08 | 0.23 | 0 |
| 1.58 | 0.36 | 0     | 0.92 | 0.28 | 0 |
| 1.33 | 0.32 | 0     | 0.96 | 0.25 | 0 |

|      |       |   |      |      |   |
|------|-------|---|------|------|---|
| 1.94 | 0.58  | 0 | 0.76 | 0.16 | 0 |
| 1.46 | 0.13  | 1 | 1.14 | 0.43 | 0 |
| 1.34 | 0.52  | 0 | 1    | 0.15 | 0 |
| 1.79 | 0.41  | 0 | 0.81 | 0.36 | 0 |
| 1.33 | 0.13  | 1 | 0.93 | 0.38 | 0 |
| 1.41 | 0.04  | 1 | 0.9  | 0.1  | 0 |
| 1.02 | 0.13  | 1 | 1.04 | 0.24 | 0 |
| 1.82 | 0.34  | 0 | 0.99 | 0.24 | 0 |
| 2.26 | 0.58  | 0 | 0.84 | 0.36 | 0 |
| 1.57 | 0.2   | 0 | 0.94 | 0.16 | 0 |
| 2.01 | 0.76  | 0 | 0.85 | 0.62 | 0 |
| 2.23 | 0.19  | 0 | 0.83 | 0.95 | 0 |
| 1.61 | 0.37  | 1 | 1.14 | 0.35 | 0 |
| 1.34 | 0.6   | 1 | 0.84 | 0.15 | 0 |
| 1.12 | 0.15  | 1 | 0.95 | 0.25 | 0 |
| 1.65 | 0.65  | 0 | 0.78 | 0.64 | 0 |
| 2.07 | 0.37  | 0 | 0.98 | 0.39 | 0 |
| 1.9  | 0.45  | 0 | 0.99 | 0.22 | 0 |
| 1.79 | 0.2   | 0 | 0.87 | 0.37 | 0 |
| 1.63 | 0.33  | 0 | 1.25 | 0.27 | 0 |
| 2    | 0.29  | 0 | 0.86 | 0.27 | 0 |
| 1.63 | 0.26  | 0 | 0.93 | 0.18 | 0 |
| n/a  | n/a   | 0 | n/a  | n/a  | 0 |
| 2.01 | 0.34  | 1 | 1.63 | 0.57 | 0 |
| 1.21 | 0.58  | 0 | 0.88 | 0.14 | 0 |
| 1.29 | 0.17  | 0 | 0.91 | 0.32 | 0 |
| 1.66 | 0.48  | 0 | 0.99 | 0.31 | 0 |
| 1.91 | 0.46  | 0 | 1.05 | 0.29 | 0 |
| 0.79 | 0.22  | 1 | 0.92 | 0.25 | 0 |
| 0.65 | 0.13  | 1 | 0.86 | 0.27 | 0 |
| 1.7  | 0.28  | 0 | 1.92 | 0.96 | 0 |
| 1.83 | 0.13  | 0 | 0.83 | 0.21 | 0 |
| 0.75 | 0.08  | 1 | 0.89 | 0.27 | 0 |
| 0.87 | 0.19  | 1 | 0.93 | 0.34 | 0 |
| 1.83 | 0.23  | 0 | 1.02 | 0.29 | 0 |
| 1.41 | 0.9   | 0 | 0.85 | 0.12 | 0 |
| 1.59 | 0.31  | 0 | 0.71 | 0.14 | 0 |
| 1.74 | 0.53  | 0 | 0.95 | 0.26 | 0 |
| 0.58 | 0.1   | 1 | 0.96 | 0.27 | 0 |
| 1.6  | 62.18 | 0 | 0.86 | 0.18 | 0 |
| 1.21 | 0.11  | 0 | 0.78 | 0.16 | 0 |
| 1.38 | 0.65  | 0 | 1.04 | 0.19 | 0 |
| 2.03 | 0.36  | 0 | 0.85 | 0.29 | 0 |
| 1.69 | 0.48  | 0 | 0.87 | 0.19 | 0 |
| 0.47 | 0.07  | 1 | 0.68 | 0.36 | 0 |
| 1.53 | 0.29  | 0 | 0.95 | 0.17 | 0 |
| 1.46 | 0.26  | 0 | 0.98 | 0.35 | 0 |
| 1.14 | 0.13  | 1 | 1.19 | 0.43 | 0 |
| 1.59 | 0.38  | 0 | 1.07 | 0.3  | 0 |
|      |       | 1 | 0.92 | 0.35 | 0 |
| 1.83 | 0.71  | 0 | 1.07 | 0.39 | 0 |
| 0.09 | 0.02  | 1 | 0.81 | 0.35 | 1 |

|      |      |   |      |      |   |
|------|------|---|------|------|---|
| 1.18 | 0.09 | 1 | 1.05 | 0.12 | 0 |
| 1.82 | 0.49 | 0 | 0.93 | 0.34 | 0 |
| 1.69 | 0.26 | 0 | 1.09 | 0.19 | 0 |
|      |      | 0 | 0.96 | 0.23 | 0 |
| 1.68 | 0.35 | 0 | 1.06 | 0.39 | 0 |
| 1.31 | 0.62 | 0 | 0.96 | 0.19 | 0 |
| 0.77 | 0.04 | 1 | 1.1  | 0.21 | 0 |
| 1.68 | 0.28 | 0 | 0.87 | 0.23 | 0 |
| 1.32 | 0.44 | 0 | 0.84 | 0.2  | 0 |
| 1.63 | 0.39 | 0 | 1.07 | 0.16 | 0 |
| 0.64 | 0.04 | 1 | 0.9  | 0.18 | 0 |
| 1.09 | 0.16 | 1 | 0.86 | 0.23 | 0 |
| 1.09 | 0.04 | 0 | 0.91 | 0.23 | 0 |
| 1.38 | 0.59 | 0 | 0.98 | 0.25 | 0 |
| 1.36 | 0.6  | 0 | 0.93 | 0.36 | 0 |
| 1.28 | 0.35 | 0 | 1.02 | 0.17 | 0 |
| 1.57 | 0.16 | 0 | 1.12 | 0.23 | 0 |
| 1.8  | 0.35 | 0 | 1.07 | 0.25 | 0 |
| 0.48 | 0.06 | 1 | 0.66 | 0.21 | 0 |
| 1.54 | 0.58 | 0 | 1    | 0.43 | 0 |
| 0.27 | 0.08 | 1 | 0.73 | 0.27 | 0 |
| 0.77 | 0.07 | 1 | 1.06 | 0.21 | 0 |
| 1.27 | 0.27 | 0 | 1.07 | 0.1  | 0 |
| 0.52 | 0.05 | 1 | 0.83 | 0.19 | 0 |
| 1.54 | 0.37 | 1 | 0.81 | 0.2  | 0 |
| 1.2  | 0.27 | 1 | 1.17 | 0.27 | 0 |
| 1.31 | 0.48 | 0 | 0.86 | 0.19 | 0 |
| 2.38 | 0.31 | 1 | 2.45 | 0.66 | 1 |
| 0.86 | 0.66 | 1 | 0.84 | 0.2  | 0 |
| 1.49 | 0.65 | 0 | 0.93 | 0.15 | 0 |
|      |      | 0 | 0.87 | 0.31 | 0 |
| 1.32 | 0.24 | 0 | 1.08 | 0.14 | 0 |
| 1.22 | 0.25 | 0 | 0.9  | 0.17 | 0 |
| n/a  | n/a  | 0 | n/a  | n/a  | 0 |
|      | 2    | 0 | 1.04 | 0.25 | 0 |
| n/a  | n/a  | 0 | n/a  | n/a  | 0 |
| 1.7  | 0.4  | 0 | 0.9  | 0.3  | 0 |
| 2.84 | 1.01 | 0 | 0.8  | 0.34 | 0 |
| 0.97 | 0.21 | 0 | 0.86 | 0.33 | 0 |
| 2.02 | 0.27 | 0 | 0.88 | 0.27 | 0 |
| 0.38 | 0.09 | 1 | 0.78 | 0.54 | 1 |
| 2.04 | 0.75 | 0 | 1.74 | 0.93 | 0 |
| 1.48 | 0.5  | 0 | 0.84 | 0.12 | 0 |
| 1.67 | 0.8  | 0 | 0.89 | 0.11 | 0 |
| 1.13 | 0.14 | 1 | 0.95 | 0.3  | 0 |
| 1.83 | 0.81 | 0 | 0.86 | 0.42 | 0 |
| 1.08 | 0.22 | 1 | 0.99 | 0.29 | 0 |
| 1.04 | 0.19 | 1 | 0.9  | 0.14 | 0 |
| 1.34 | 0.68 | 0 | 0.74 | 0.2  | 0 |
| 0.83 | 0.52 | 1 | 1.03 | 0.19 | 0 |
| 1.74 | 0.92 | 0 | 1.2  | 0.3  | 0 |
| n/a  | n/a  | 0 | n/a  | n/a  | 0 |



|     |      |      |   |      |      |   |
|-----|------|------|---|------|------|---|
|     | 2.07 | 0.19 | 1 | 2.89 | 0.7  | 0 |
|     | 1.83 | 0.63 | 0 | 0.86 | 0.35 | 0 |
|     | 1.99 | 0.1  | 1 | 1.42 | 0.37 | 0 |
|     | 1.16 | 0.09 | 1 | 1.02 | 0.79 | 0 |
| n/a | n/a  |      | 0 | n/a  | n/a  | 0 |
|     | 0.27 | 0.19 | 1 | 0.8  | 0.38 | 1 |
|     | 1.75 | 0.75 | 0 | 0.96 | 0.22 | 0 |
|     | 0.51 | 0.69 | 1 | 1.04 | 0.53 | 0 |
|     | 1.4  | 0.38 | 0 | 0.98 | 0.17 | 0 |
|     | 1.38 | 0.27 | 0 | 1.02 | 0.42 | 0 |
| n/a | n/a  |      | 0 | n/a  | n/a  | 0 |
|     | 1.39 | 0.49 | 0 | 1.03 | 0.13 | 0 |
|     | 1.96 | 0.77 | 0 | 0.92 | 0.36 | 0 |
|     |      |      | 0 | 1.01 | 0.55 | 0 |
|     | 1.37 | 0.26 | 0 | 0.92 | 0.33 | 0 |
|     | 1.3  | 0.22 | 0 | 0.99 | 0.26 | 0 |
|     | 1    | 0.07 | 1 | 0.85 | 0.38 | 0 |
|     | 1.44 | 0.29 | 1 | 1.23 | 0.38 | 0 |
|     | 3.74 | 2.15 | 1 | 1.08 | 0.32 | 0 |
|     | 1.59 | 0.6  | 0 | 0.77 | 0.18 | 0 |
|     | 2.28 | 0.6  | 0 | 0.76 | 0.42 | 0 |
|     | 1.36 | 0.33 | 1 | 0.92 | 0.25 | 0 |
|     | 1.95 | 0.82 | 0 | 0.85 | 0.25 | 0 |
| n/a | n/a  |      | 0 | n/a  | n/a  | 0 |
|     | 0.99 | 0.11 | 1 | 1.1  | 0.21 | 0 |
|     | 1.95 | 0.47 | 0 | 0.97 | 0.42 | 0 |
|     | 0.2  | 0.18 | 1 | 0.95 | 0.42 | 1 |
|     | 0.64 | 0.28 | 1 | 1.35 | 0.37 | 0 |
|     | 1.3  | 0.62 | 0 | 0.9  | 0.11 | 0 |
|     | 0.99 | 0.11 | 1 | 1.42 | 0.32 | 0 |
|     | 2.08 | 0.85 | 0 | 1.18 | 0.21 | 0 |
|     | 1.05 | 0.21 | 1 | 0.79 | 0.18 | 0 |
|     | 2.05 | 0.3  | 0 | 1.01 | 0.15 | 0 |
|     | 0.98 | 0.14 | 1 | 1.12 | 0.39 | 0 |
|     | 1.78 | 0.96 | 0 | 0.98 | 0.2  | 0 |
|     | 1.19 | 0.47 | 1 | 0.98 | 0.26 | 0 |
| n/a | n/a  |      | 0 | n/a  | n/a  | 0 |
|     | 2.34 | 0.49 | 0 | 0.86 | 0.19 | 0 |
|     | 1.15 | 0.37 | 1 | 0.84 | 0.21 | 0 |
|     | 1.43 | 0.88 | 1 | 1.04 | 0.16 | 0 |
|     | 2.01 | 0.32 | 1 | 0.87 | 0.28 | 0 |
|     | 1.37 | 0.31 | 1 | 2.4  | 0.87 | 0 |
|     | 1.68 | 0.8  | 0 | 0.83 | 0.19 | 0 |
|     | 1.89 | 0.85 | 0 | 0.93 | 0.24 | 0 |
|     | 1.51 | 0.41 | 0 | 1.01 | 0.27 | 0 |
|     | 1.23 | 0.26 | 1 | 0.76 | 0.18 | 0 |
|     |      |      | 1 | 1.01 | 0.21 | 0 |
|     | 1.99 | 0.27 | 0 | 1.23 | 0.16 | 0 |
|     | 1.29 | 0.52 | 1 | 0.99 | 0.1  | 0 |
|     | 1.66 | 0.92 | 0 | 0.87 | 0.25 | 0 |
|     | 1.54 | 0.36 | 0 | n/a  | n/a  | 0 |
| n/a | n/a  |      | 0 | n/a  | n/a  | 0 |

|     |       |      |       |      |      |   |
|-----|-------|------|-------|------|------|---|
|     | 1.36  | 0.24 | 1     | 1.01 | 0.46 | 1 |
|     |       |      | 0     | 1.29 | 0.29 | 0 |
| n/a | n/a   |      | 0 n/a | n/a  |      | 0 |
|     | 1.28  | 0.85 | 0     | 0.98 | 0.11 | 0 |
|     | 2.07  | 0.92 | 0     | 1.02 | 0.21 | 0 |
|     | 1.36  | 0.35 | 0     | 1.39 | 0.28 | 0 |
|     | 1.6   | 5.69 | 0     | 0.94 | 8.5  | 0 |
|     | 2.38  | 0.26 | 0     | 1.04 | 0.6  | 0 |
|     | 21.14 | 7.46 | 1     | 2.87 | 0.72 | 0 |
|     | 1.38  | 0.19 | 1     | 0.88 | 0.29 | 0 |
|     | 0.94  | 0.17 | 1     | 0.86 | 0.56 | 1 |
|     | 1.2   | 0.35 | 1     | 2.77 | 0.53 | 0 |
|     | 0.34  | 0.1  | 1     | 1.31 | 0.5  | 1 |
|     | 1.4   | 0.1  | 0     | 1.01 | 0.22 | 0 |
|     |       |      | 0     | 0.79 | 0.11 | 0 |
|     | 1.68  | 0.27 | 0     | 0.77 | 0.26 | 0 |
|     | 1.1   | 0.08 | 1     | 0.79 | 0.14 | 0 |
|     | 1.06  | 0.15 | 1     | 1.16 | 0.44 | 0 |
|     | 2.08  | 0.25 | 0     | 0.93 | 0.18 | 0 |
| n/a | n/a   |      | 0 n/a | n/a  |      | 0 |
|     | 1.43  | 0.42 | 0     | 1.14 | 0.26 | 0 |
|     | 1.8   | 0.37 | 0     | 1.46 | 0.45 | 0 |
|     | 1.56  | 0.35 | 0     | 1    | 0.24 | 0 |
| n/a | n/a   |      | 0 n/a | n/a  |      | 0 |
|     | 1.38  | 0.22 | 1     | 1.52 | 1.15 | 0 |
| n/a | n/a   |      | 0 n/a | n/a  |      | 0 |
| n/a | n/a   |      | 0 n/a | n/a  |      | 0 |
| n/a | n/a   |      | 0 n/a | n/a  |      | 0 |
| n/a | n/a   |      | 0 n/a | n/a  |      | 0 |
| n/a | n/a   |      | 0 n/a | n/a  |      | 0 |
| n/a | n/a   |      | 0 n/a | n/a  |      | 0 |
| n/a | n/a   |      | 0 n/a | n/a  |      | 0 |
| n/a | n/a   |      | 0 n/a | n/a  |      | 0 |
| n/a | n/a   |      | 0 n/a | n/a  |      | 0 |
| n/a | n/a   |      | 0 n/a | n/a  |      | 0 |
| n/a | n/a   |      | 0 n/a | n/a  |      | 0 |
| n/a | n/a   |      | 0 n/a | n/a  |      | 0 |
| n/a | n/a   |      | 0 n/a | n/a  |      | 0 |
| n/a | n/a   |      | 0 n/a | n/a  |      | 0 |
| n/a | 1.71  | 0.15 | 0     | 0.92 | 0.38 | 0 |
| n/a | n/a   |      | 0 n/a | n/a  |      | 0 |
|     | 1.13  | 0.55 | 0     | n/a  |      | 0 |
| n/a | n/a   |      | 0 n/a | n/a  |      | 0 |
| n/a | n/a   |      | 0 n/a | n/a  |      | 0 |
| n/a | n/a   |      | 0 n/a | n/a  |      | 0 |
|     | 1.5   | 0.36 | 1     | 0.95 | 0.21 | 0 |
|     | 1.88  | 0.96 | 0     | 0.97 | 0.18 | 0 |
|     | 1.47  | 0.64 | 0     | 0.93 | 0.12 | 0 |
|     | 1.24  | 0.94 | 0     | 1.74 | 0.22 | 0 |
|     | 1.52  | 1.46 | 1     | 0.93 | 0.19 | 0 |
|     | 1.31  | 0.3  | 0     | 0.94 | 0.2  | 0 |
|     | 1.62  | 0.79 | 0     | 0.87 | 0.18 | 0 |
|     | 1.97  | 0.29 | 0     | 1.02 | 0.17 | 0 |
|     | 2.16  | 0.24 | 1     | 3.07 | 0.65 | 1 |
|     | 2.06  | 0.67 | 0     | 1    | 0.14 | 0 |

|     |      |      |       |      |      |   |
|-----|------|------|-------|------|------|---|
|     | 3    | 1.5  | 0     | 0.97 | 0.19 | 0 |
|     | 1.18 | 0.36 | 0     | 0.9  | 0.19 | 0 |
|     | 1.78 | 0.9  | 0     | 1.15 | 0.29 | 0 |
|     | 1.62 | 0.36 | 0     | 0.92 | 0.28 | 0 |
|     | 0.98 | 0.18 | 1     | 0.97 | 0.2  | 0 |
|     | 1.5  | 0.41 | 0     | 0.91 | 0.11 | 0 |
|     | 1.88 | 0.54 | 0     | 1.06 | 0.17 | 0 |
|     | 1.45 | 0.48 | 0     | 1.03 | 0.23 | 0 |
|     | 1.71 | 0.67 | 0     | 0.82 | 0.21 | 0 |
|     | 1.25 | 0.29 | 1     | 1.15 | 0.22 | 0 |
|     | 1.43 | 0.62 | 0     | 0.94 | 0.28 | 0 |
|     | 1.84 | 0.5  | 0     | 0.83 | 0.21 | 0 |
|     | 1.33 | 2.98 | 0     | 1.13 | 0.24 | 0 |
|     |      |      | 1     | 1.16 | 0.45 | 0 |
|     | 1.86 | 1.18 | 0     | 0.84 | 0.25 | 0 |
|     | 1.23 | 0.13 | 1     | 0.87 | 0.39 | 0 |
|     | 1.26 | 0.4  | 1     | 1.22 | 0.33 | 0 |
|     | 0.74 | 0.13 | 1     | 0.8  | 0.33 | 0 |
|     | 1.73 | 0.52 | 0     | 0.92 | 0.13 | 0 |
|     | 0.47 | 0.17 | 1     | 1.05 | 0.4  | 1 |
|     | 1.04 | 0.55 | 0     | 0.87 | 0.36 | 0 |
| n/a | n/a  |      | 0 n/a | n/a  |      | 0 |
| n/a | n/a  |      | 0 n/a | n/a  |      | 0 |
| n/a | n/a  |      | 0 n/a | n/a  |      | 0 |
| n/a | n/a  |      | 0 n/a | n/a  |      | 0 |
| n/a | n/a  |      | 0 n/a | n/a  |      | 0 |
| n/a | n/a  |      | 0 n/a | n/a  |      | 0 |
|     | 1.28 | 0.12 | 0     | 0.85 | 0.32 | 0 |
|     | 1.07 | 0.19 | 1     | 0.98 | 0.25 | 0 |
| n/a | n/a  |      | 0 n/a | n/a  |      | 0 |
|     | 1.22 | 0.09 | 1     | 0.85 | 0.58 | 0 |
|     | 1.98 | 0.27 | 0     | 1.18 | 0.23 | 0 |
|     | 2.03 | 0.37 | 0     | 0.95 | 0.4  | 0 |
|     | 1.21 | 0.64 | 0     | 0.71 | 0.24 | 0 |
|     | 1.77 | 0.19 | 0     | 0.79 | 0.26 | 0 |
|     | 1.02 | 0.23 | 1     | 1.14 | 0.24 | 0 |
| n/a | n/a  |      | 0 n/a | n/a  |      | 0 |
| n/a | n/a  |      | 0 n/a | n/a  |      | 0 |
|     | 1.14 | 0.05 | 0     | 0.88 | 0.17 | 0 |
| n/a | n/a  |      | 0 n/a | n/a  |      | 0 |
|     | 1.42 | 0.01 | 0     | 0.8  | 0.12 | 0 |
|     | 1.28 | 0.27 | 0     | 0.82 | 0.27 | 0 |
|     | 1.83 | 0.36 | 0     | 0.78 | 0.11 | 0 |
|     | 1.13 | 0.32 | 1     | 0.79 | 0.22 | 0 |
|     | 1.4  | 0.42 | 0     | 0.83 | 0.16 | 0 |
| n/a | n/a  |      | 0 n/a | n/a  |      | 0 |
|     | 0.89 | 0.28 | 1     | 1.12 | 0.15 | 0 |
|     | 1    | 0.15 | 1     | 0.93 | 0.27 | 0 |
|     | 1.92 | 0.26 | 0     | 1.03 | 0.38 | 0 |
|     | 1.21 | 0.31 | 1     | 0.83 | 0.3  | 0 |
|     | 1.58 | 0.2  | 0     | 0.93 | 0.27 | 0 |
|     | 1.67 | 0.39 | 0     | 1.03 | 0.26 | 0 |

|     |      |      |       |      |      |   |
|-----|------|------|-------|------|------|---|
|     | 1.51 | 0.61 | 1     | 1.03 | 0.15 | 0 |
|     | 1.29 | 0.26 | 0     | 1.02 | 0.39 | 0 |
|     | 2.14 | 0.17 | 0     | 0.89 | 0.33 | 0 |
|     |      |      | 0     | 1.15 | 0.3  | 0 |
|     | 2.31 | 0.17 | 0     | 1.14 | 0.12 | 0 |
|     | 0.82 | 0.27 | 1     | 0.82 | 0.37 | 0 |
|     | 1.79 | 0.36 | 0     | 0.89 | 0.42 | 0 |
|     | 1.52 | 0.25 | 0     | 0.99 | 0.2  | 0 |
| n/a | n/a  |      | 0 n/a | n/a  |      | 0 |
|     | 1.59 | 0.29 | 0     | 0.98 | 0.15 | 0 |
| n/a | n/a  |      | 0 n/a | n/a  |      | 0 |
|     | 1.34 | 0.83 | 0     | 1.15 | 0.49 | 0 |
|     | 1.79 | 0.25 | 0     | 0.8  | 0.09 | 0 |
| n/a | n/a  |      | 0 n/a | n/a  |      | 0 |
| n/a | n/a  |      | 0 n/a | n/a  |      | 0 |
|     | 0.88 | 0.09 | 1     | 0.93 | 0.21 | 0 |
|     | 1.59 | 0.57 | 0     | 1.11 | 0.22 | 0 |
|     | 2.12 | 0.72 | 0     | 0.8  | 0.19 | 0 |
| n/a | n/a  |      | 0 n/a | n/a  |      | 0 |
| n/a | n/a  |      | 0 n/a | n/a  |      | 0 |
|     | 1.33 | 0.05 | 0     | 1.12 | 0.19 | 0 |
|     | 1.31 | 0.18 | 0     | 1.03 | 0.56 | 0 |
| n/a | n/a  |      | 0 n/a | n/a  |      | 0 |
|     | 1.53 | 3.06 | 0     | 0.85 | 0.22 | 0 |
|     | 1.7  | 0.13 | 0     | 0.67 | 0.16 | 0 |
|     | 1.31 | 0.16 | 0     | 1.26 | 0.21 | 0 |
|     | 2.63 | 0.69 | 0     | 0.82 | 0.16 | 0 |
|     | 2.08 | 0.3  | 0     | 1.12 | 0.41 | 0 |
|     | 1.25 | 0.31 | 1     | 0.65 | 0.18 | 0 |
| n/a | n/a  |      | 0 n/a | n/a  |      | 0 |
|     | 1.5  | 0.36 | 1     | 0.86 | 0.4  | 0 |
|     | 1.36 | 0.07 | 0     | 1.01 | 0.28 | 0 |
|     | 1.12 | 0.11 | 0     | 0.91 | 0.25 | 0 |
| n/a | n/a  |      | 0 n/a | n/a  |      | 0 |
|     | 2.18 | 0.43 | 0     | 0.95 | 0.7  | 0 |
|     | 1.52 | 0.18 | 0     | 1.04 | 0.19 | 0 |
|     | 2.11 | 0.53 | 0     | 0.93 | 0.21 | 0 |
|     | 0.75 | 0.45 | 1     | 0.75 | 0.23 | 0 |
|     | 1.56 | 0.21 | 0     | 1    | 0.05 | 0 |
| n/a | n/a  |      | 0 n/a | n/a  |      | 0 |
|     | 1.26 | 0.16 | 1     | 0.76 | 0.24 | 0 |
|     | 2.26 | 0.61 | 0     | 0.84 | 0.16 | 0 |
|     | 1.52 | 0.42 | 1     | 0.84 | 0.22 | 0 |
|     | 1.45 | 0.58 | 0     | 0.89 | 0.21 | 0 |
| n/a | n/a  |      | 0 n/a | n/a  |      | 0 |
|     | 1.36 | 0.15 | 0     | 0.88 | 0.29 | 0 |
|     | 1.73 | 0.54 | 0     | 1.07 | 0.13 | 0 |
| n/a | n/a  |      | 0 n/a | n/a  |      | 0 |
|     | 1.24 | 0.65 | 0     | 0.92 | 0.22 | 0 |
|     | 1.88 | 0.87 | 1     | 1.03 | 0.17 | 0 |
|     | 1.13 | 0.25 | 0     | 1.01 | 0.37 | 0 |
|     | 0.99 | 0.09 | 0     | 0.98 | 0.18 | 0 |

|     |      |      |       |      |      |   |
|-----|------|------|-------|------|------|---|
|     |      |      | 0     | 1.08 | 0.3  | 0 |
|     | 2.01 | 0.4  | 0     | 1.06 | 0.45 | 0 |
|     | 1.66 | 0.4  | 0     | 1.2  | 0.13 | 0 |
|     | 1.96 | 0.23 | 0     | 0.81 | 0.49 | 0 |
|     | 1.87 | 0.1  | 0     | 0.94 | 0.32 | 0 |
|     | 1.82 | 0.23 | 0     | 1    | 0.13 | 0 |
|     | 1.42 | 0.31 | 0     | 1.01 | 0.23 | 0 |
|     | 0.99 | 0.18 | 1     | 1.13 | 0.22 | 0 |
|     | 1.94 | 0.26 | 0     | 0.86 | 0.2  | 0 |
| n/a | n/a  |      | 0 n/a | n/a  |      | 0 |
|     | 1.54 | 0.59 | 0     | 1    | 1.22 | 0 |
|     | 1.54 | 0.26 | 0     | 1.07 | 0.4  | 0 |
|     | 1.7  | 0.66 | 0     | 0.88 | 0.26 | 0 |
|     | 1.59 | 0.36 | 0     | 0.99 | 0.31 | 0 |
|     | 2.23 | 0.73 | 0     | 0.95 | 0.27 | 0 |
|     | 2.1  | 0.73 | 0     | 0.79 | 0.08 | 0 |
|     | 1.56 | 0.22 | 0     | 1.12 | 0.26 | 0 |
|     | 1.96 | 0.6  | 0     | 1.11 | 0.2  | 0 |
|     | 1.43 | 0.32 | 0     | 0.92 | 0.32 | 0 |
|     | 0.37 | 0.07 | 1     | 1.26 | 0.2  | 0 |
|     |      |      | 1     | 0.68 | 0.17 | 0 |
|     | 1.49 | 0.14 | 1     | 1.03 | 0.19 | 0 |
|     | 1.82 | 0.13 | 0     | 0.95 | 0.19 | 0 |
|     | 2.38 | 0.91 | 0     | 0.95 | 0.21 | 0 |
| n/a | n/a  |      | 0 n/a | n/a  |      | 0 |
| n/a | n/a  |      | 0 n/a | n/a  |      | 0 |
|     | 1.82 | 0.2  | 0     | 0.81 | 0.22 | 0 |
|     |      |      | 0     | 0.85 | 0.21 | 0 |
|     | 1.62 | 0.25 | 0     | 0.76 | 0.1  | 0 |
|     | 1.5  | 0.83 | 0     | 0.95 | 0.24 | 0 |
|     | 1.49 | 0.14 | 0     | 0.99 | 0.19 | 0 |
|     | 1.68 | 0.48 | 0     | 1.19 | 0.5  | 0 |
|     | 4.53 | 1.55 | 1     | 0.93 | 0.17 | 0 |
|     | 1.81 | 0.26 | 0     | 0.87 | 0.26 | 0 |
|     | 1.42 | 0.27 | 0     | 1.05 | 0.21 | 0 |
|     | 0.35 | 0.01 | 1     | 0.83 | 0.13 | 0 |
|     | 2.21 | 0.68 | 0     | 1.07 | 0.36 | 0 |
|     | 1.22 | 0.31 | 0     | 0.92 | 0.35 | 0 |
|     | 0.41 | 0.06 | 1     | 0.82 | 0.31 | 0 |
|     | 0.43 | 0.04 | 1     | 1.01 | 0.31 | 1 |
|     | 0.78 | 0.16 | 1     | 0.92 | 0.23 | 0 |
|     | 0.46 | 0.22 | 1     | 0.84 | 0.32 | 1 |
|     | 0.79 | 0.03 | 1     | 0.92 | 0.22 | 0 |
|     | 1.86 | 0.2  | 0     | 1.01 | 0.2  | 0 |
|     | 0.64 | 0.1  | 1     | 1.02 | 0.21 | 0 |
|     | 0.78 | 0.15 | 1     | 0.94 | 0.57 | 0 |
|     | 1.29 | 0.4  | 1     | 1.04 | 0.15 | 0 |
|     | 1.75 | 0.47 | 0     | 1.01 | 0.19 | 0 |
|     | 1.56 | 0.3  | 0     | 0.96 | 0.21 | 0 |
|     | 1.38 | 0.33 | 1     | 0.7  | 0.29 | 0 |
|     | 2.07 | 0.7  | 0     | 0.95 | 0.28 | 0 |
|     | 0.43 | 0.07 | 1     | 0.83 | 0.3  | 0 |

|      |      |   |      |      |   |
|------|------|---|------|------|---|
| 1.75 | 0.21 | 0 | 0.88 | 0.22 | 0 |
| 1.54 | 1.09 | 0 | 0.7  | 0.09 | 0 |
| 1.32 | 0.23 | 0 | 0.9  | 0.25 | 0 |
| 1.87 | 0.35 | 0 | 0.87 | 0.14 | 0 |
| 1.55 | 0.56 | 0 | 1.02 | 0.33 | 0 |
| 0.3  | 0.04 | 1 | 0.85 | 0.2  | 0 |
| 1.59 | 0.43 | 0 | 1.11 | 0.28 | 0 |
| 1.06 | 0.26 | 1 | 1.03 | 0.24 | 0 |
| 1.87 | 0.36 | 0 | 0.93 | 0.22 | 0 |
| 1.92 | 0.17 | 0 | 0.97 | 0.27 | 0 |
| 1.67 | 0.7  | 0 | 1.12 | 0.21 | 0 |
| 1.9  | 0.43 | 0 | 1.13 | 0.22 | 0 |
| 1.71 | 0.18 | 0 | 0.96 | 0.29 | 0 |
| 1.3  | 0.22 | 0 | 0.95 | 0.18 | 0 |
| 0.92 | 0.08 | 1 | 0.89 | 0.26 | 0 |
|      |      | 0 | 0.73 | 0.36 | 0 |
| 1.51 | 0.34 | 0 | 0.8  | 0.28 | 0 |
| 1.72 | 0.33 | 0 | 0.96 | 0.27 | 0 |
| 0.55 | 0.03 | 1 | 1.06 | 0.3  | 0 |
| 1.96 | 0.49 | 0 | 0.95 | 0.31 | 0 |
| 1.51 | 0.36 | 0 | 0.68 | 0.13 | 0 |
| 1.59 | 0.46 | 0 | 1.06 | 0.18 | 0 |
| 1.53 | 0.11 | 0 | 1.24 | 0.34 | 0 |
| 1.32 | 0.3  | 0 | 0.84 | 0.64 | 0 |
| 0.06 | 0    | 1 | 0.82 | 0.19 | 1 |
| 1.42 | 0.34 | 0 | 0.85 | 0.22 | 0 |
| 1.73 | 0.46 | 0 | 0.87 | 0.2  | 0 |
| 0.65 | 0.12 | 1 | 1.01 | 0.42 | 0 |
| 1.64 | 0.2  | 1 | 1.16 | 0.24 | 0 |
| 0.57 | 0.23 | 1 | 0.93 | 0.11 | 0 |
| 0.25 | 0.05 | 1 | 1.02 | 0.24 | 1 |
| 1.24 | 0.16 | 0 | 0.77 | 0.17 | 0 |
| 1.17 | 0.21 | 0 | 1    | 0.17 | 0 |
|      |      | 1 | 1.01 | 0.26 | 0 |
| 2.14 | 0.54 | 0 | 0.84 | 0.46 | 0 |
| 0.18 | 0.05 | 1 | 0.84 | 0.16 | 1 |
| 0.38 | 0.07 | 1 | 0.98 | 0.08 | 0 |
|      |      | 0 | 0.99 | 0.3  | 0 |
| 0.94 | 0.18 | 1 | 1.03 | 0.32 | 0 |
| 1.66 | 0.63 | 0 | 0.94 | 0.17 | 0 |
| 2.12 | 0.74 | 0 | 1.4  | 1.02 | 0 |
| 0.71 | 0.07 | 1 | 1.04 | 0.15 | 0 |
| 1.97 | 1.03 | 0 | 1.03 | 0.19 | 0 |
| 1.77 | 1.44 | 0 | 0.95 | 0.18 | 0 |
| 1.14 | 0.02 | 1 | 0.99 | 0.21 | 0 |
| 1.45 | 0.18 | 1 | 1.04 | 0.18 | 0 |
| 1.11 | 0.08 | 1 | 1.05 | 0.18 | 0 |
| 1.56 | 0.59 | 0 | 0.92 | 0.23 | 0 |
| 2.1  | 0.14 | 1 | 0.87 | 0.21 | 0 |
| 1.49 | 0.54 | 0 | 0.86 | 0.24 | 0 |
| 2.18 | 0.02 | 0 | 0.95 | 0.34 | 0 |
|      |      | 0 | 0.99 | 0.27 | 0 |

|     |      |      |       |      |       |   |
|-----|------|------|-------|------|-------|---|
|     | 0.63 | 0.01 | 1     | 0.84 | 0.24  | 0 |
|     | 1.43 | 0.43 | 0     | 0.76 | 0.11  | 0 |
|     | 1.28 | 0.12 | 1     | 0.86 | 0.18  | 0 |
| n/a | n/a  |      | 0 n/a | n/a  |       | 0 |
|     | 1.57 | 0.51 | 0     | 0.92 | 0.37  | 0 |
|     | 1.55 | 0.14 | 0     | 1.07 | 0.19  | 0 |
| n/a | n/a  |      | 0 n/a | n/a  |       | 0 |
|     | 1.65 | 0.13 | 0     | 1.06 | 0.31  | 0 |
|     | 1.51 | 0.32 | 0     | 1.01 | 0.1   | 0 |
|     | 1.84 | 0.32 | 0     | 0.92 | 0.26  | 0 |
|     | 1.73 | 0.19 | 0     | 0.84 | 0.18  | 0 |
|     | 2.09 | 0.38 | 0     | 0.93 | 0.2   | 0 |
|     | 0.43 | 0.15 | 1     | 1.06 | 0.21  | 0 |
|     | 1.56 | 0.25 | 1     | 0.95 | 0.19  | 0 |
|     | 1.64 | 0.27 | 0     | 1.04 | 0.21  | 0 |
|     | 1.82 | 0.16 | 0     | 0.84 | 0.16  | 0 |
|     | 0.86 | 0.23 | 1     | 0.93 | 0.21  | 0 |
|     | 1.28 | 0.84 | 0     | 0.77 | 0.24  | 0 |
|     | 0.5  | 0.09 | 1     | 0.73 | 0.13  | 0 |
|     | 2.43 | 0.65 | 0     | 0.79 | 0.21  | 0 |
|     | 0.98 | 0.28 | 1     | 0.9  | 0.23  | 0 |
|     | 1.06 | 0.32 | 0     | 0.84 | 0.25  | 0 |
|     | 2.18 | 0.66 | 0     | 0.87 | 0.21  | 0 |
|     | 0.99 | 0.17 | 1     | 1.07 | 0.2   | 0 |
|     | 1.62 | 0.28 | 0     | 0.84 | 0.19  | 0 |
|     | 2.22 | 0.51 | 0     | 1.86 | 0.46  | 0 |
|     | 0.16 | 0.04 | 1     | 0.83 | 0.25  | 1 |
|     | 0.55 | 0.05 | 1     | 1.48 | 0.41  | 0 |
|     | 1.56 | 0.22 | 1     | 0.79 | 0.68  | 0 |
|     | 1.41 | 0.44 | 0     | 0.96 | 0.27  | 0 |
|     | 1.52 | 0.25 | 0     | 0.94 | 0.13  | 0 |
| n/a | n/a  |      | 0 n/a | n/a  |       | 0 |
|     | 2.05 | 0.32 | 0     | 0.87 | 0.23  | 0 |
|     | 1.29 | 0.54 | 0     | 0.86 | 0.16  | 0 |
|     | 0.1  | 0.03 | 1     | 0.73 | 0.22  | 1 |
|     | 1.77 | 0.34 | 0     | 0.71 | 0.21  | 0 |
|     | 2.51 | 0.76 | 0     | 0.95 | 0.24  | 0 |
|     | 0.11 | 0.01 | 1     | 0.79 | 0.19  | 1 |
|     | 1.76 | 0.57 | 1     | 0.91 | 0.25  | 0 |
|     | 1.29 | 0.14 | 1     | 1.34 | 0.29  | 0 |
|     | 1.33 | 0.87 | 0     | 0.9  | 0.19  | 0 |
|     | 1.19 | 0.25 | 1     | 1.02 | 0.26  | 0 |
|     | 0.97 | 0.09 | 1     | 1.55 | 0.35  | 0 |
|     | 1.74 | 0.03 | 0     | 0.95 | 0.29  | 0 |
|     | 0.48 | 0.02 | 1     | 0.96 | 0.24  | 1 |
|     | 1.56 | 0.74 | 0     | 0.83 | 0.14  | 0 |
|     | 0.76 | 0.1  | 1     | 1.28 | 0.27  | 0 |
|     | 0.65 | 0.03 | 1     | 0.68 | 27.17 | 1 |
|     | 1.69 | 0.3  | 0     | 1.11 | 0.2   | 0 |
|     |      |      | 1     | 0.79 | 0.23  | 1 |
|     | 1.59 | 0.12 | 0     | 1.08 | 0.3   | 0 |
|     | 0.69 | 0.02 | 1     | 0.94 | 0.15  | 0 |

|     |      |      |     |      |      |
|-----|------|------|-----|------|------|
| n/a | n/a  | 0    | n/a | n/a  | 0    |
|     | 1.4  | 0.45 | 0   | 0.77 | 0.17 |
|     | 1.14 | 0.64 | 1   | 0.61 | 0.22 |
|     | 1.63 | 0.69 | 0   | 1.05 | 0.4  |
|     | 1.34 | 1.39 | 0   | 0.96 | 0.27 |
|     | 1.84 | 1.08 | 0   | 0.94 | 0.74 |
|     | 1.98 | 0.35 | 1   | 1.33 | 0.23 |
|     | 1.11 | 0.04 | 1   | 1.21 | 0.34 |
|     | 0.41 | 0.02 | 1   | 0.89 | 0.18 |
|     | 1.94 | 0.41 | 1   | 2.53 | 0.94 |
|     | 3.33 | 1.02 | 1   | 5.4  | 1.12 |
|     | 2.14 | 0.15 | 0   | 1.05 | 3    |
|     |      |      | 0   | 0.95 | 0.41 |
|     | 2.36 | 0.52 | 0   | 0.81 | 0.17 |
|     | 1.46 | 0.31 | 1   | 0.9  | 0.23 |
|     | 0.61 | 0.05 | 1   | 0.95 | 0.22 |
|     | 2.07 | 0.93 | 1   | 1.24 | 0.29 |
| n/a | n/a  | 0    | n/a | n/a  | 0    |
|     | 0.41 | 0.19 | 1   | 0.88 | 0.29 |
|     |      |      | 0   | 1.21 | 0.36 |
|     | 1.8  | 0.56 | 0   | 3.53 | 0.83 |
|     | 1.63 | 0.47 | 0   | 0.94 | 0.2  |
|     | 1.94 | 0.57 | 0   | 1.31 | 0.29 |
|     | 1.43 | 0.31 | 1   | 0.71 | 0.32 |
|     | 1.64 | 0.38 | 0   | 1.13 | 0.26 |
|     | 0.92 | 0.28 | 0   | 1.03 | 0.26 |
|     | 1.37 | 0.26 | 0   | 0.95 | 0.26 |
|     | 1.32 | 0.15 | 0   | 1.27 | 0.09 |
|     | 0.52 | 0.07 | 1   | 1.33 | 0.35 |
|     | 1.84 | 0.47 | 0   | 0.99 | 0.19 |
| n/a | n/a  | 0    | n/a | n/a  | 0    |
|     | 1.74 | 0.76 | 0   | 0.99 | 0.52 |
|     | 1.5  | 0.83 | 0   | 0.98 | 0.28 |
|     | 1.45 | 0.24 | 0   | n/a  | n/a  |
|     | 2.52 | 0.79 | 0   | 1.02 | 0.23 |
| n/a | n/a  | 0    | n/a | n/a  | 0    |
|     | 1.36 | 0.12 | 0   | 0.88 | 0.22 |
| n/a | n/a  | 0    | n/a | n/a  | 0    |
| n/a | n/a  | 0    | n/a | n/a  | 0    |
| n/a | n/a  | 0    | n/a | n/a  | 0    |
| n/a | n/a  | 0    | n/a | n/a  | 0    |
| n/a | n/a  | 0    | n/a | n/a  | 0    |
| n/a | n/a  | 0    | n/a | n/a  | 0    |
| n/a | n/a  | 0    | n/a | n/a  | 0    |
| n/a | n/a  | 0    | n/a | n/a  | 0    |
| n/a | n/a  | 0    | n/a | n/a  | 0    |
|     | 1.18 | 0.18 | 1   | 1.35 | 0.23 |
|     | 2.22 | 0.36 | 0   | 0.95 | 0.3  |
| n/a | n/a  | 0    | n/a | n/a  | 0    |
| n/a | n/a  | 0    | n/a | n/a  | 0    |



|      |      |   |      |      |   |
|------|------|---|------|------|---|
| 5.37 | 2    | 1 | 0.85 | 0.35 | 0 |
| 0.21 | 0.03 | 1 | 0.76 | 0.13 | 1 |
|      |      | 0 | 1.01 | 0.35 | 0 |
| 1.19 | 0.57 | 0 | 1.1  | 0.3  | 0 |
| 1.67 | 0.51 | 0 | 0.98 | 0.27 | 0 |
| 0.97 | 0.21 | 0 | 1    | 0.14 | 0 |
| 2.06 | 0.99 | 0 | 1.01 | 0.11 | 0 |
| 0.78 | 0.15 | 1 | 1.41 | 0.26 | 0 |
| 2.14 | 0.33 | 0 | 0.97 | 0.19 | 0 |
| 1.27 | 0.81 | 0 | 1.1  | 0.29 | 0 |
| 2.64 | 0.83 | 0 | 0.85 | 0.36 | 0 |
| 2.53 | 1.37 | 0 | 0.94 | 0.17 | 0 |
| 1.3  | 0.17 | 1 | 1.31 | 0.37 | 0 |
| 1.63 | 0.29 | 0 | 1.03 | 0.23 | 0 |
| 1.9  | 0.2  | 0 | 0.84 | 0.24 | 0 |
| 1.93 | 0.2  | 1 | 1.24 | 0.41 | 0 |
| 2.17 | 0.54 | 0 | 0.89 | 0.28 | 0 |
| 1.42 | 0.43 | 0 | 0.85 | 0.15 | 0 |
| 1.94 | 0.16 | 0 | 0.72 | 0.13 | 0 |
| 2.08 | 0.39 | 0 | 1.02 | 0.32 | 0 |
| 3.74 | 1.74 | 1 | 3.22 | 1.29 | 0 |
| 1.6  | 0.91 | 0 | 0.93 | 0.18 | 0 |
| 1.28 | 0.68 | 0 | 1.19 | 0.21 | 0 |
| 1.61 | 0.07 | 0 | 0.9  | 0.17 | 0 |
| 1.73 | 1.26 | 0 | 0.99 | 0.22 | 0 |
| 1.47 | 0.19 | 1 | 0.87 | 0.17 | 0 |
| 2.15 | 0.35 | 0 | 1.04 | 0.24 | 0 |
| 1.55 | 0.15 | 0 | 0.94 | 0.35 | 0 |
| 1.51 | 0.47 | 0 | 1.12 | 0.3  | 0 |
| 2.06 | 0.4  | 0 | 0.91 | 0.55 | 0 |
| 1.35 | 0.71 | 0 | 0.93 | 0.2  | 0 |
| 1.18 | 0.42 | 0 | 0.98 | 0.32 | 0 |
| 1.75 | 0.43 | 0 | 1.18 | 0.11 | 0 |
| n/a  | n/a  | 0 | n/a  | n/a  | 0 |
| n/a  | n/a  | 0 | n/a  | n/a  | 0 |
| n/a  | n/a  | 0 | n/a  | n/a  | 0 |
| n/a  | n/a  | 0 | n/a  | n/a  | 0 |
| n/a  | n/a  | 0 | n/a  | n/a  | 0 |
| n/a  | n/a  | 0 | n/a  | n/a  | 0 |
|      |      | 0 | 0.84 | 0.27 | 0 |
| 1.09 | 0.16 | 1 | 0.93 | 0.15 | 0 |
| 1.79 | 0.28 | 0 | 0.91 | 0.19 | 0 |
| 2.09 | 0.52 | 0 | 0.92 | 0.19 | 0 |
| n/a  | n/a  | 0 | n/a  | n/a  | 0 |
| 1.05 | 0.38 | 0 | 0.99 | 0.13 | 0 |
|      |      | 0 | 0.9  | 0.37 | 0 |
| 1.71 | 0.39 | 0 | 0.76 | 0.28 | 0 |
| 1.87 | 0.08 | 0 | 0.93 | 0.24 | 0 |
| 1.55 | 0.18 | 0 | 0.83 | 0.21 | 0 |
|      |      | 0 | 0.89 | 0.13 | 0 |
| 0.31 | 0.03 | 1 | 0.82 | 0.36 | 1 |
| 1.67 | 0.32 | 0 | 0.84 | 0.24 | 0 |

|     |      |      |       |      |      |   |
|-----|------|------|-------|------|------|---|
|     |      |      | 0     | 0.95 | 0.42 | 0 |
|     | 0.88 | 0.38 | 0     | 1.06 | 0.2  | 0 |
| n/a | n/a  |      | 0 n/a | n/a  |      | 0 |
|     | 1.18 | 0.27 | 0     | 0.91 | 0.15 | 0 |
|     | 0.84 | 0.09 | 0     | 0.91 | 0.27 | 0 |
| n/a | n/a  |      | 0 n/a | n/a  |      | 0 |
|     |      |      | 0     | 1.24 | 0.34 | 0 |
|     | 1.58 | 0.25 | 0     | 1.05 | 0.15 | 0 |
|     | 1.46 | 0.31 | 1     | 1.16 | 0.31 | 0 |
|     | 2.09 | 0.58 | 1     | 0.99 | 0.13 | 0 |
|     | 1.7  | 0.29 | 0     | 1.04 | 0.25 | 0 |
|     | 1.62 | 0.29 | 0     | 0.99 | 0.19 | 0 |
|     | 1    | 0.17 | 0     | 0.89 | 0.27 | 0 |
|     | 1.61 | 0.28 | 0     | 1    | 0.22 | 0 |
|     | 1.5  | 0.32 | 0     | 0.89 | 0.31 | 0 |
|     | 1.25 | 0.14 | 0     | 0.98 | 0.23 | 0 |
|     | 1.53 | 0.59 | 0     | 1.01 | 0.14 | 0 |
|     | 1.86 | 0.4  | 0     | 0.93 | 0.21 | 0 |
|     | 0.89 | 0.36 | 0     | 1    | 0.34 | 0 |
|     | 0.9  | 0.17 | 1     | 1.1  | 0.4  | 0 |
|     | 1.56 | 0.25 | 0     | 1.04 | 0.17 | 0 |
| n/a | n/a  |      | 0 n/a | n/a  |      | 0 |
|     | 1.15 | 0.11 | 0     | 1.03 | 0.39 | 0 |
| n/a | n/a  |      | 0 n/a | n/a  |      | 0 |
| n/a | n/a  |      | 0 n/a | n/a  |      | 0 |
| n/a | n/a  |      | 0 n/a | n/a  |      | 0 |
|     | 3.25 | 3.19 | 1     | 1.01 | 0.4  | 0 |
| n/a | n/a  |      | 0 n/a | n/a  |      | 0 |
|     | 1.43 | 0.44 | 0     | 0.88 | 0.22 | 0 |
|     | 1.74 | 0.49 | 0     | 0.83 | 0.27 | 0 |
|     | 1.5  | 0.19 | 1     | 0.92 | 0.17 | 0 |
|     | 1.83 | 6.18 | 0     | 0.85 | 0.13 | 0 |
|     | 2    | 0.28 | 0     | 0.98 | 0.2  | 0 |
|     | 1.31 | 0.16 | 0     | 0.8  | 0.23 | 0 |
|     | 2.42 | 0.67 | 0     | 0.79 | 0.16 | 0 |
|     | 1.44 | 0.29 | 1     | 1.59 | 0.58 | 0 |
| n/a | n/a  |      | 0 n/a | n/a  |      | 0 |
|     | 1.89 | 0.18 | 0     | 1.09 | 0.32 | 0 |
|     | 0.53 | 0.12 | 1     | 1    | 0.21 | 0 |
|     | 1.21 | 0.69 | 0     | 0.98 | 0.38 | 0 |
| n/a | n/a  |      | 0 n/a | n/a  |      | 0 |
|     | 1.47 | 0.62 | 0     | 0.91 | 0.12 | 0 |
|     |      |      | 0     | 0.96 | 0.14 | 0 |
| n/a | n/a  |      | 0 n/a | n/a  |      | 0 |
|     | 2.08 | 0.6  | 0     | 1.05 | 0.22 | 0 |
| n/a | n/a  |      | 0 n/a | n/a  |      | 0 |
|     | 1.18 | 0.18 | 0     | 0.96 | 0.28 | 0 |
| n/a | n/a  |      | 0 n/a | n/a  |      | 0 |
|     | 1.09 | 0.32 | 0     | 0.96 | 0.41 | 0 |
|     | 2.21 | 0.31 | 0     | 0.93 | 0.23 | 0 |
|     | 1.95 | 0.26 | 0     | 0.85 | 0.18 | 0 |
|     | 1.52 | 0.46 | 0     | 1.13 | 0.33 | 0 |

|     |      |      |       |      |      |   |
|-----|------|------|-------|------|------|---|
|     | 1.39 | 0.32 | 1     | 1.21 | 0.41 | 0 |
|     | 1.68 | 0.23 | 1     | 1.73 | 0.6  | 0 |
|     | 2.36 | 0.69 | 0     | 0.9  | 0.34 | 0 |
|     | 1.78 | 0.28 | 0     | 0.99 | 0.23 | 0 |
| n/a | n/a  |      | 0 n/a | n/a  |      | 0 |
| n/a | n/a  |      | 0 n/a | n/a  |      | 0 |
| n/a | n/a  |      | 0 n/a | n/a  |      | 0 |
| n/a | n/a  |      | 0 n/a | n/a  |      | 0 |
| n/a | n/a  |      | 0 n/a | n/a  |      | 0 |
|     | 1.69 | 0.13 | 0     | 1.05 | 0.34 | 0 |
|     | 1.69 | 0.4  | 0     | 0.85 | 0.22 | 0 |
|     | 1.81 | 0.22 | 0     | 0.74 | 0.28 | 0 |
|     | 1.41 | 0.03 | 0     | 0.82 | 0.09 | 0 |
|     | 1.06 | 0.39 | 0     | 0.82 | 0.26 | 0 |
|     | 1.04 | 0.16 | 0     | 1.07 | 0.27 | 0 |
|     | 1.86 | 0.13 | 0     | 0.85 | 0.17 | 0 |
|     | 1.06 | 0.52 | 1     | 1.25 | 0.39 | 0 |
|     | 1.35 | 0.26 | 0     | 1.09 | 0.24 | 0 |
|     | 1.37 | 0.24 | 0     | 0.85 | 0.28 | 0 |
|     | 0.86 | 0.26 | 1     | 1.08 | 0.31 | 0 |
|     | 1.77 | 0.2  | 0     | 1.28 | 0.23 | 0 |
|     | 1.87 | 0.52 | 0     | 1.05 | 0.34 | 0 |
|     | 1.71 | 0.27 | 0     | 0.74 | 0.32 | 0 |
|     | 0.65 | 0.07 | 1     | 1.16 | 0.45 | 0 |
| n/a | n/a  |      | 0 n/a | n/a  |      | 0 |
|     | 2.09 | 0.51 | 1     | 1.24 | 0.36 | 0 |
|     | 1.9  | 0.53 | 0     | 0.9  | 0.06 | 0 |
|     | 0.36 | 0.1  | 1     | 0.92 | 0.16 | 1 |
|     |      |      | 1     | 0.91 | 0.18 | 0 |
|     | 0.65 | 0.09 | 1     | 0.76 | 0.27 | 0 |
|     | 0.63 | 0.22 | 1     | 0.84 | 0.24 | 0 |
| n/a | n/a  |      | 0 n/a | n/a  |      | 0 |
|     | 1.93 | 0.28 | 0     | 0.97 | 0.23 | 0 |
|     | 1.6  | 0.17 | 0     | 1.13 | 0.16 | 0 |
|     | 1.14 | 0.14 | 0     | 1.03 | 0.19 | 0 |
|     | 1.31 | 0.34 | 0     | 0.88 | 0.36 | 0 |
| n/a | n/a  |      | 0 n/a | n/a  |      | 0 |
|     | 1.51 | 0.23 | 0     | 0.79 | 0.45 | 0 |
|     | 0.79 | 0.06 | 1     | 0.75 | 0.32 | 0 |
|     | 1.45 | 0.33 | 0     | 0.96 | 4.42 | 0 |
|     | 1.56 | 0.61 | 0     | 1.03 | 0.36 | 0 |
|     | 2.07 | 0.64 | 0     | 0.92 | 0.19 | 0 |
|     | 1.19 | 0.12 | 0     | 1.05 | 0.31 | 0 |
|     | 2.26 | 0.43 | 0     | 1.23 | 0.39 | 0 |
|     | 1.92 | 0.11 | 0     | 1.09 | 0.55 | 0 |
| n/a | n/a  |      | 0 n/a | n/a  |      | 0 |
| n/a | n/a  |      | 0 n/a | n/a  |      | 0 |
|     | 0.72 | 0.09 | 1     | 0.85 | 0.21 | 0 |
|     | 1.84 | 0.2  | 0     | 0.86 | 0.28 | 0 |
|     | 1.09 | 0.25 | 1     | 1.1  | 0.22 | 0 |
|     |      |      | 1     | 1.14 | 0.29 | 0 |
|     | 0.88 | 0.24 | 1     | 1.04 | 0.14 | 0 |

|      |      |   |      |      |   |
|------|------|---|------|------|---|
|      |      | 1 | 0.8  | 0.2  | 0 |
| 1.02 | 0.21 | 0 | 0.95 | 0.15 | 0 |
|      |      | 1 | 1.37 | 0.28 | 0 |
| 1.37 | 0.58 | 0 | 1.24 | 0.33 | 0 |
| 1.33 | 0.12 | 0 | 0.9  | 0.22 | 0 |
|      |      | 1 | 0.87 | 0.19 | 0 |
| 1.91 | 0.17 | 1 | 2.53 | 0.77 | 0 |
| 1.38 | 0.5  | 0 | 0.98 | 0.16 | 0 |
| 1.29 | 0.28 | 1 | 0.92 | 0.18 | 0 |
|      |      | 1 | 0.72 | 0.21 | 0 |
| 1.72 | 0.39 | 0 | 1.11 | 2.05 | 0 |
| 1.92 | 0.23 | 0 | 0.95 | 0.22 | 0 |
| 1.33 | 0.42 | 0 | 0.91 | 0.25 | 0 |
| 0.79 | 0.11 | 1 | 0.97 | 0.13 | 0 |
| 1.32 | 1.81 | 0 | 1.54 | 1.15 | 0 |
| 0.65 | 0.15 | 1 | 1.02 | 0.21 | 0 |
| 1.62 | 0.56 | 0 | 0.9  | 0.19 | 0 |
| 1.16 | 0.29 | 0 | 0.72 | 0.11 | 0 |
| 0.96 | 0.32 | 1 | 0.96 | 0.22 | 0 |
| 1.37 | 0.03 | 1 | 1.28 | 0.3  | 0 |
| 0.37 | 0.03 | 1 | 1.27 | 0.18 | 1 |
| 1.21 | 0.18 | 0 | 1.02 | 0.3  | 0 |
| 2.21 | 0.78 | 0 | 0.89 | 0.35 | 0 |
| 1.12 | 0.15 | 0 | 1.07 | 0.32 | 0 |
| 1.51 | 0.41 | 0 | 0.82 | 0.33 | 0 |
| 0.33 | 0.06 | 1 | 1.02 | 0.32 | 0 |
| 0.96 | 0.05 | 0 | 0.89 | 0.24 | 0 |
| 1.29 | 0.17 | 0 | 0.95 | 0.19 | 0 |
| 1.94 | 0.28 | 0 | 0.87 | 0.25 | 0 |
| n/a  | n/a  | 0 | n/a  | n/a  | 0 |
|      |      | 0 | 0.73 | 0.12 | 0 |
| 2.24 | 0.32 | 0 | 0.81 | 0.26 | 0 |
| 1.05 | 0.12 | 1 | 1.05 | 0.22 | 0 |
| 0.74 | 0.05 | 1 | 1.36 | 0.47 | 0 |
| 1.62 | 0.4  | 0 | 0.97 | 0.33 | 0 |
| 0.59 | 0.16 | 1 | 1.07 | 0.1  | 1 |
| 1.45 | 0.13 | 0 | 0.83 | 0.53 | 0 |
| 1.13 | 0.71 | 0 | 0.88 | 0.23 | 0 |
| 2.19 | 0.45 | 0 | 0.86 | 0.16 | 0 |
| 0.95 | 0.2  | 1 | 0.81 | 0.27 | 0 |
| 1.46 | 0.14 | 0 | 0.97 | 0.26 | 0 |
| 1.35 | 0.71 | 0 | 0.81 | 0.28 | 0 |
| 1.31 | 0.09 | 0 | 0.91 | 0.29 | 0 |
| 1.21 | 0.11 | 0 | 0.99 | 0.24 | 0 |
| 1.55 | 0.46 | 0 | 0.89 | 0.22 | 0 |
| 1.02 | 0.4  | 0 | 0.96 | 0.27 | 0 |
| 2.13 | 0.11 | 0 | 0.85 | 0.19 | 0 |
| n/a  | n/a  | 0 | n/a  | n/a  | 0 |
|      |      | 0 | 0.98 | 0.08 | 0 |
| 1.86 | 0.47 | 0 | 0.86 | 0.12 | 0 |
|      |      | 0 | 0.61 | 0.29 | 0 |
| 2.97 | 1.82 | 1 | 3.59 | 0.66 | 0 |

|     |      |      |       |      |       |   |
|-----|------|------|-------|------|-------|---|
|     | 1.29 | 0.14 | 1     | 1.15 | 0.38  | 0 |
|     | 1.6  | 0.34 | 0     | 0.87 | 0.31  | 0 |
|     | 1.82 | 0.48 | 0     | 1.28 | 0.57  | 0 |
|     | 1.71 | 0.43 | 0     | 0.86 | 0.22  | 0 |
| n/a | n/a  |      | 0 n/a | n/a  |       | 0 |
|     | 1.75 | 0.31 | 0     | 0.85 | 0.45  | 0 |
|     | 1.89 | 0.44 | 0     | 0.88 | 0.21  | 0 |
|     | 1.66 | 0.07 | 0     | 0.92 | 0.33  | 0 |
|     | 1.49 | 0.18 | 0     | 0.96 | 0.36  | 0 |
|     | 1.68 | 0.08 | 1     | 1.11 | 0.32  | 0 |
|     | 1.07 | 0.24 | 0     | 0.93 | 0.17  | 0 |
|     | 1.63 | 0.28 | 0     | 0.97 | 0.22  | 0 |
|     | 1    | 0.3  | 1     | 0.96 | 0.16  | 0 |
|     | 0.98 | 0.08 | 1     | 1.04 | 20.89 | 0 |
| n/a | n/a  |      | 0 n/a | n/a  |       | 0 |
|     | 1.15 | 0.24 | 0     | 0.79 | 0.35  | 0 |
|     | 1.7  | 0.24 | 0     | 0.97 | 0.13  | 0 |
|     | 1.7  | 0.17 | 0     | 1.02 | 0.32  | 0 |
|     | 2.1  | 0.39 | 0     | 0.93 | 0.25  | 0 |
| n/a | n/a  |      | 0 n/a | n/a  |       | 0 |
|     | 1.07 | 0.07 | 0     | 0.93 | 0.16  | 0 |
|     | 1.15 | 0.13 | 0     | 1.12 | 0.22  | 0 |
|     | 0.85 | 0.13 | 1     | 1.1  | 0.35  | 0 |
| n/a | n/a  |      | 0 n/a | n/a  |       | 0 |
| n/a | n/a  |      | 0 n/a | n/a  |       | 0 |
|     | 1.39 | 0.48 | 0     | 0.84 | 0.3   | 0 |
|     | 0.62 | 0.14 | 1     | 0.81 | 0.25  | 0 |
| n/a | n/a  |      | 0 n/a | n/a  |       | 0 |
|     | 1.26 | 0.2  | 0     | 1.09 | 0.48  | 0 |
| n/a | n/a  |      | 0 n/a | n/a  |       | 0 |
|     | 1.57 | 0.47 | 0     | 0.83 | 0.48  | 0 |
|     | 1.22 | 0.15 | 1     | 1.07 | 0.07  | 0 |
|     | 1.7  | 0.35 | 0     | 0.77 | 0.38  | 0 |
|     | 1.57 | 0.33 | 1     | 0.83 | 0.33  | 0 |
|     | 2.62 | 0.87 | 0     | 0.98 | 0.2   | 0 |
|     | 1.06 | 0.17 | 1     | 1.04 | 0.34  | 0 |
|     | 1.92 | 0.23 | 0     | 0.78 | 0.35  | 0 |
|     | 1.51 | 0.06 | 0     | 1    | 0.25  | 0 |
|     | 2.06 | 0.52 | 0     | 0.87 | 0.44  | 0 |
|     | 1.21 | 0.05 | 0     | 0.89 | 0.19  | 0 |
|     | 1.45 | 0.13 | 0     | 0.91 | 0.25  | 0 |
|     | 1.95 | 0.43 | 0     | 1.03 | 0.23  | 0 |
|     | 1.36 | 0.08 | 0     | 0.97 | 0.37  | 0 |
|     | 1.04 | 0.12 | 1     | 1.2  | 0.17  | 0 |
|     | 0.63 | 0.17 | 1     | 1.32 | 0.32  | 1 |
|     | 1.29 | 0.35 | 0     | 1.37 | 0.96  | 0 |
|     | 0.85 | 0.18 | 1     | 0.91 | 0.14  | 0 |
|     | 1.31 | 0.12 | 0     | 0.92 | 0.3   | 0 |
|     | 1.46 | 0.33 | 1     | 0.94 | 0.24  | 0 |
|     | 1.55 | 0.43 | 0     | 0.99 | 0.23  | 0 |
|     | 2.58 | 0.89 | 0     | 0.95 | 0.23  | 0 |
|     | 2.06 | 0.76 | 0     | 0.79 | 0.16  | 0 |

|      |      |   |      |      |   |
|------|------|---|------|------|---|
| 1.25 | 0.15 | 1 | 1.34 | 0.18 | 0 |
| 0.9  | 0.13 | 1 | 0.99 | 0.09 | 0 |
| 2.14 | 0.41 | 1 | 2.89 | 0.62 | 0 |
| 0.67 | 0.1  | 1 | 0.81 | 0.15 | 0 |
| 2.11 | 0.49 | 0 | 0.76 | 0.16 | 0 |
| 1.43 | 0.08 | 0 | 1.03 | 0.43 | 0 |
| 1.02 | 0.13 | 1 | 1.07 | 0.18 | 0 |
| 1.1  | 0.15 | 1 | 1.22 | 0.3  | 0 |
| 1.03 | 0.23 | 0 | 0.96 | 0.46 | 0 |
| 2.29 | 0.5  | 0 | 0.8  | 0.35 | 0 |
| 1.03 | 0.32 | 1 | 1.21 | 0.35 | 0 |
| 1.58 | 0.19 | 0 | 0.75 | 0.13 | 0 |
| 0.67 | 0.09 | 0 | 0.76 | 0.27 | 0 |
| 1.67 | 0.45 | 0 | 0.84 | 0.37 | 0 |
| 1.43 | 0.29 | 0 | 0.91 | 0.12 | 0 |
| 0.22 | 0.04 | 1 | 0.82 | 0.17 | 1 |
| 1.87 | 0.6  | 0 | 0.92 | 0.21 | 0 |
| 1.4  | 0.09 | 1 | 0.97 | 0.21 | 0 |
| 1.24 | 0.37 | 1 | 0.86 | 0.28 | 0 |
|      |      | 1 | 0.69 | 0.09 | 1 |
| 1.88 | 0.31 | 1 | 2.47 | 0.85 | 0 |
| 0.67 | 0.19 | 1 | 0.9  | 0.08 | 0 |
| 0.75 | 0.06 | 1 | 1.06 | 0.11 | 0 |
| 1.94 | 0.31 | 0 | 0.83 | 0.3  | 0 |
| 0.79 | 0.82 | 1 | 0.92 | 0.2  | 0 |
| n/a  | n/a  | 0 | n/a  | n/a  | 0 |
| 1.09 | 0.03 | 1 | 0.84 | 0.19 | 0 |
| 1.88 | 0.32 | 0 | 0.87 | 0.23 | 0 |
| 0.33 | 0.41 | 1 | 0.72 | 0.25 | 1 |
| 0.58 | 0.22 | 1 | 0.9  | 0.29 | 1 |
| 1.62 | 0.08 | 0 | 0.97 | 0.37 | 0 |
| 1.55 | 0.37 | 0 | 0.87 | 0.18 | 0 |
| 1.58 | 0.32 | 0 | 0.86 | 0.43 | 0 |
| 1.31 | 0.14 | 1 | 0.89 | 0.18 | 0 |
|      |      | 0 | 0.81 | 0.3  | 0 |
| 2.02 | 0.13 | 0 | 1.1  | 0.27 | 0 |
| 1.61 | 0.67 | 0 | 1.05 | 0.26 | 0 |
| 1.45 | 0.76 | 0 | 0.87 | 0.41 | 0 |
| 1.42 | 0.49 | 0 | 0.95 | 0.49 | 0 |
| 0.87 | 0.59 | 0 | 1.09 | 0.18 | 0 |
| 0.99 | 0.38 | 0 | 0.8  | 0.22 | 0 |
| 2.05 | 0.1  | 0 | 1.01 | 0.22 | 0 |
| 0.55 | 0.04 | 1 | 1.06 | 0.35 | 1 |
| 1.49 | 0.32 | 0 | 1.04 | 0.21 | 0 |
| 1.64 | 0.03 | 0 | 1.03 | 0.33 | 0 |
| 0.57 | 0.04 | 1 | 0.85 | 0.08 | 1 |
| 2.08 | 0.13 | 0 | 0.95 | 0.22 | 0 |
| n/a  | n/a  | 0 | n/a  | n/a  | 0 |
| 1.71 | 0.52 | 0 | 0.87 | 0.51 | 0 |
| n/a  | n/a  | 0 | n/a  | n/a  | 0 |
| n/a  | n/a  | 0 | n/a  | n/a  | 0 |
| n/a  | n/a  | 0 | n/a  | n/a  | 0 |



|     |      |      |       |      |      |   |
|-----|------|------|-------|------|------|---|
|     | 1.69 | 0.5  | 0     | 0.92 | 0.2  | 0 |
|     | 1.78 | 1.57 | 0     | 1.2  | 0.32 | 0 |
|     |      |      | 0     | 0.88 | 0.18 | 0 |
|     | 1.17 | 0.31 | 0     | 1.17 | 0.36 | 0 |
|     | 1.96 | 0.82 | 0     | 0.82 | 0.3  | 0 |
|     | 1.75 | 0.3  | 0     | 0.8  | 0.62 | 0 |
|     | 0.86 | 0.67 | 0     | 1.05 | 0.21 | 0 |
|     | 1.28 | 0.3  | 1     | 1.22 | 0.38 | 0 |
|     | 1.82 | 0.47 | 0     | 0.99 | 0.3  | 0 |
|     | 1.62 | 0.3  | 0     | 0.99 | 0.21 | 0 |
|     | 1.78 | 0.24 | 0     | 1.06 | 0.16 | 0 |
|     | 0.48 | 0.11 | 1     | 0.98 | 0.46 | 1 |
|     | 1.43 | 0.94 | 0     | 0.98 | 0.13 | 0 |
|     | 2.67 | 0.68 | 1     | 1.07 | 0.27 | 0 |
|     |      |      | 1     | 0.99 | 0.29 | 0 |
| n/a | n/a  |      | 0 n/a | n/a  |      | 0 |
| n/a | n/a  |      | 0 n/a | n/a  |      | 0 |
|     | 1.57 | 0.3  | 0     | 1.17 | 0.16 | 0 |
| n/a | n/a  |      | 0 n/a | n/a  |      | 0 |
|     | 2.04 | 0.6  | 0     | 1.07 | 0.11 | 0 |
| n/a | n/a  |      | 0 n/a | n/a  |      | 0 |
|     | 1.61 | 0.33 | 0 n/a | n/a  |      | 0 |
| n/a | n/a  |      | 0 n/a | n/a  |      | 0 |
|     | 2.07 | 0.36 | 0     | 0.82 | 0.44 | 0 |
| n/a | n/a  |      | 0 n/a | n/a  |      | 0 |
|     | 1.36 | 0.2  | 0     | 1.17 | 0.23 | 0 |
|     | 2.15 | 0.11 | 0     | 1.08 | 0.45 | 0 |
|     | 1.79 | 0.41 | 0     | 0.81 | 0.28 | 0 |
|     | 0.58 | 0.1  | 1     | 0.88 | 0.24 | 0 |
| n/a | n/a  |      | 0 n/a | n/a  |      | 0 |
|     | 1.78 | 0.3  | 0     | 0.81 | 0.29 | 0 |
|     | 1.54 | 0.76 | 0     | 1.05 | 0.35 | 0 |
|     | 1.98 | 0.51 | 0     | 0.87 | 0.22 | 0 |
|     | 2.06 | 0.51 | 0     | 0.92 | 0.2  | 0 |
| n/a | n/a  |      | 0 n/a | n/a  |      | 0 |
|     | 1.07 | 0.37 | 1     | 1.13 | 0.61 | 0 |
|     | 2.47 | 0.2  | 0     | 1.16 | 0.18 | 0 |
|     | 1.45 | 0.18 | 0     | 1.24 | 0.55 | 0 |
| n/a | n/a  |      | 0 n/a | n/a  |      | 0 |
|     | 1.72 | 0.52 | 0     | 0.93 | 0.33 | 0 |
|     | 1.56 | 0.06 | 0     | 0.77 | 0.23 | 0 |
| n/a | n/a  |      | 0 n/a | n/a  |      | 0 |
| n/a | n/a  |      | 0 n/a | n/a  |      | 0 |
|     |      |      | 1     | 0.82 | 0.15 | 0 |
|     | 1.92 | 0.32 | 0     | 0.95 | 0.19 | 0 |
|     | 1.13 | 0.25 | 1     | 0.96 | 0.11 | 0 |
|     | 2.1  | 0.59 | 1     | 1.09 | 0.15 | 0 |
|     | 2.48 | 0.57 | 0     | 0.9  | 0.15 | 0 |
| n/a | n/a  |      | 0 n/a | n/a  |      | 0 |
| n/a | n/a  |      | 0 n/a | n/a  |      | 0 |
|     | 1.67 | 0.15 | 0     | 0.83 | 0.32 | 0 |
|     | 0.63 | 0.15 | 1     | 3.27 | 1.01 | 0 |



|     |      |      |     |      |      |   |
|-----|------|------|-----|------|------|---|
| n/a | n/a  | 0    | n/a | n/a  | 0    |   |
|     | 1.74 | 0.74 | 0   | 1.18 | 0.34 | 0 |
|     | 2.06 | 0.3  | 0   | 1.18 | 0.28 | 0 |
|     | 1.79 | 0.55 | 0   | 1.05 | 0.42 | 0 |
|     |      |      | 0   | 0.98 | 0.52 | 0 |
|     | 1.27 | 0.69 | 1   | 0.99 | 0.06 | 0 |
|     | 0.59 | 0.12 | 1   | 1.01 | 0.32 | 0 |
|     | 1.68 | 0.22 | 0   | 1.11 | 0.29 | 0 |
|     | 2.56 | 0.4  | 0   | 0.81 | 0.43 | 0 |
|     | 1.67 | 0.3  | 0   | 0.85 | 0.42 | 0 |
|     | 1.96 | 0.03 | 0   | 0.95 | 0.22 | 0 |
|     | 2.17 | 0.41 | 0   | 1.08 | 0.32 | 0 |
|     | 1.73 | 0.44 | 0   | 0.86 | 0.2  | 0 |
|     |      |      | 0   | 0.92 | 0.32 | 0 |
|     | 1.69 | 0.09 | 0   | 1.06 | 0.27 | 0 |
|     | 2.48 | 0.18 | 0   | 1.21 | 0.07 | 0 |
|     | 1.94 | 0.82 | 0   | 0.92 | 0.26 | 0 |
| n/a | n/a  | 0    | n/a | n/a  | 0    |   |
|     | 3.1  | 0.89 | 0   | 0.94 | 0.39 | 0 |
| n/a | n/a  | 0    | n/a | n/a  | 0    |   |
|     | 1.48 | 0.44 | 0   | 1.16 | 0.34 | 0 |
|     | 1.61 | 0.36 | 0   | 1.27 | 0.34 | 0 |
|     | 1.68 | 0.44 | 0   | 0.92 | 0.2  | 0 |
|     | 1.39 | 0.17 | 0   | 1.07 | 0.24 | 0 |
| n/a | n/a  | 0    | n/a | n/a  | 0    |   |
|     | 2.41 | 0.21 | 0   | 0.97 | 0.31 | 0 |
|     | 1.33 | 0.04 | 1   | 0.93 | 0.26 | 0 |
|     | 8.99 | 3.57 | 1   | 1.35 | 0.66 | 0 |
|     | 0.63 | 0.25 | 1   | 0.9  | 0.22 | 0 |
|     | 2.36 | 0.38 | 0   | 0.69 | 0.17 | 0 |
|     | 1.72 | 0.31 | 0   | 1.1  | 0.13 | 0 |
|     | 1.44 | 0.49 | 0   | 0.83 | 0.49 | 0 |
|     | 2.67 | 0.65 | 0   | 0.85 | 0.26 | 0 |
|     | 1.66 | 0.27 | 1   | 1.25 | 0.19 | 0 |
|     | 2.15 | 0.23 | 0   | 0.99 | 0.14 | 0 |
|     | 2.15 | 0.59 | 0   | 1.28 | 0.12 | 0 |
|     | 2.15 | 0.42 | 0   | 0.86 | 0.2  | 0 |
|     | 2.31 | 0.26 | 0   | 0.96 | 0.24 | 0 |
| n/a | n/a  | 0    | n/a | n/a  | 0    |   |
|     | 1.37 | 0.06 | 0   | 1.08 | 0.19 | 0 |
|     | 0.87 | 0.27 | 1   | 0.97 | 0.27 | 0 |
|     | 1.38 | 0.29 | 1   | 0.82 | 0.26 | 0 |
|     |      |      | 1   | 0.69 | 0.61 | 1 |
|     | 1.8  | 0.19 | 0   | 0.92 | 0.19 | 0 |
|     | 2.64 | 0.49 | 0   | 0.78 | 0.31 | 0 |
|     | 1.35 | 0.25 | 0   | 1    | 0.17 | 0 |
|     | 1.95 | 0.35 | 0   | 0.8  | 0.34 | 0 |
|     | 0.94 | 0.34 | 1   | 0.89 | 0.1  | 0 |
|     | 1.17 | 0.22 | 1   | 0.71 | 0.2  | 0 |
|     | 1.59 | 0.16 | 1   | 0.79 | 0.23 | 0 |
|     | 1.58 | 0.14 | 0   | 1.05 | 0.15 | 0 |
| n/a | n/a  | 0    | n/a | n/a  | 0    |   |

|      |      |   |      |      |   |
|------|------|---|------|------|---|
| n/a  | n/a  | 0 | n/a  | n/a  | 0 |
| 1.25 | 0.41 | 0 | 0.81 | 0.23 | 0 |
|      |      | 0 | 1.01 | 0.22 | 0 |
|      |      | 0 | 1.09 | 0.28 | 0 |
| 1.59 | 0.15 | 0 | 1.05 | 0.21 | 0 |
| n/a  | n/a  | 0 | n/a  | n/a  | 0 |
| 1.42 | 0.02 | 0 | 1.83 | 0.65 | 0 |
| 2.08 | 0.63 | 0 | 0.98 | 0.16 | 0 |
| 1.91 | 0.13 | 0 | 0.86 | 0.26 | 0 |
| 1.6  | 0.1  | 1 | 0.85 | 0.17 | 0 |
| 2.31 | 0.61 | 0 | 0.93 | 0.38 | 0 |
| 1.61 | 0.16 | 0 | 0.87 | 0.11 | 0 |
| 1.53 | 0.39 | 0 | 0.87 | 0.28 | 0 |
| 0.62 | 0.02 | 1 | 1.04 | 0.86 | 1 |
| 0.91 | 0.05 | 1 | 0.93 | 0.14 | 0 |
| 1.53 | 0.51 | 0 | 0.96 | 0.18 | 0 |
| 1.45 | 0.2  | 0 | 1.05 | 0.12 | 0 |
| 1.75 | 0.46 | 0 | 1.12 | 0.15 | 0 |
|      |      | 0 | 1.06 | 0.27 | 0 |
| 1.13 | 2.82 | 1 | 1.14 | 0.3  | 0 |
| 1.28 | 0.6  | 0 | 1.11 | 2.45 | 0 |
| 2.57 | 0.55 | 0 | 1.16 | 0.31 | 0 |
| 1.31 | 0.14 | 1 | 0.98 | 0.23 | 0 |
| 1.5  | 0.58 | 0 | 1.22 | 0.33 | 0 |
| 1.6  | 0.3  | 0 | 1.14 | 0.27 | 0 |
| 1.05 | 0.06 | 1 | 1.03 | 0.18 | 0 |
| 1.16 | 0.61 | 0 | 0.96 | 0.22 | 0 |
| 1.15 | 0.19 | 1 | 0.88 | 0.25 | 0 |
| 1.65 | 0.24 | 0 | 0.89 | 0.21 | 0 |
| 1.19 | 0.23 | 1 | 0.66 | 0.36 | 0 |
| 1.66 | 0.31 | 0 | 0.8  | 0.32 | 0 |
| 0.26 | 0.1  | 1 | 0.71 | 0.62 | 1 |
| 0.48 | 0.1  | 1 | 0.79 | 0.66 | 1 |
| 1    | 0.07 | 0 | 0.75 | 0.25 | 0 |
| 2.22 | 1.09 | 0 | 1.14 | 0.5  | 0 |
| 1.19 | 0.23 | 0 | 1.11 | 0.33 | 0 |
| 1.77 | 0.5  | 0 | 1.09 | 0.3  | 0 |
| 1.55 | 0.39 | 0 | 1    | 0.16 | 0 |
| 2.31 | 0.68 | 0 | 1.03 | 0.25 | 0 |
| 2.73 | 0.85 | 0 | 1.11 | 0.36 | 0 |
| 0.81 | 1.82 | 1 | 1.1  | 0.22 | 1 |
| 1.75 | 4.31 | 0 | 1.2  | 0.39 | 0 |
| 1.38 | 0.12 | 0 | 1.22 | 0.38 | 0 |
| 1.57 | 0.29 | 0 | 0.89 | 0.49 | 0 |
| 4.17 | 1    | 1 | 0.87 | 0.24 | 0 |
| 1.28 | 0.37 | 0 | 0.91 | 0.29 | 0 |
| 4.06 | 0.7  | 1 | 0.93 | 0.32 | 0 |
| 1.55 | 0.62 | 0 | 0.78 | 0.22 | 0 |
| 1.53 | 0.71 | 1 | 1.03 | 0.25 | 0 |
|      |      | 1 | 0.93 | 0.35 | 0 |
| 1.2  | 0.1  | 0 | 0.93 | 0.25 | 0 |
|      |      | 0 | 1.05 | 0.3  | 0 |

|     |      |      |       |      |      |   |
|-----|------|------|-------|------|------|---|
|     | 0.8  | 0.27 | 0     | 1    | 0.21 | 0 |
|     | 1.76 | 0.57 | 0     | 1.04 | 0.28 | 0 |
|     | 1.57 | 0.05 | 0     | 1.06 | 0.15 | 0 |
|     | 1.49 | 1.01 | 0     | 0.89 | 0.2  | 0 |
|     | 0.87 | 0.31 | 1     | 0.91 | 0.3  | 0 |
|     | 2.63 | 0.7  | 0     | 0.98 | 0.19 | 0 |
|     | 1.8  | 0.79 | 0     | 1.25 | 0.44 | 0 |
|     | 1.98 | 0.25 | 0     | 0.99 | 0.21 | 0 |
|     | 1.61 | 0.14 | 0     | 1.54 | 0.3  | 0 |
| n/a | n/a  |      | 0 n/a | n/a  |      | 0 |
|     | 1.57 | 1    | 0     | 0.67 | 0.37 | 0 |
|     | 0.93 | 0.07 | 1     | 0.86 | 0.49 | 0 |
|     | 1.51 | 0.1  | 0     | 0.84 | 0.16 | 0 |
|     | 0.54 | 0.07 | 1     | 0.96 | 0.17 | 0 |
|     | 0.52 | 0.13 | 1     | 0.91 | 0.19 | 0 |
|     | 0.89 | 0.11 | 1     | 0.89 | 0.31 | 0 |
|     | 1.85 | 0.43 | 0     | 0.77 | 0.16 | 0 |
|     | 1.81 | 0.19 | 0     | 0.98 | 0.38 | 0 |
|     | 1.7  | 0.11 | 1     | 0.84 | 0.12 | 0 |
|     | 0.99 | 0.06 | 1     | 0.88 | 0.15 | 0 |
| n/a | n/a  |      | 0 n/a | n/a  |      | 0 |
|     | 1.05 | 0.38 | 0     | 1.03 | 0.28 | 0 |
|     | 1.47 | 0.45 | 0     | 1.16 | 0.4  | 0 |
|     | 1.86 | 0.23 | 0     | 1.34 | 2.21 | 0 |
|     | 1.98 | 0.9  | 0     | 1.24 | 0.3  | 0 |
|     | 1.71 | 0.39 | 0     | 1.14 | 0.16 | 0 |
|     | 2.11 | 0.33 | 0     | 0.9  | 0.26 | 0 |
|     | 1.43 | 0.33 | 0     | 0.92 | 0.26 | 0 |
|     | 1.61 | 0.38 | 0     | 0.97 | 0.17 | 0 |
| n/a | n/a  |      | 0 n/a | n/a  |      | 0 |
|     | 0.9  | 0.03 | 1     | 0.79 | 0.34 | 1 |
|     | 1.84 | 0.51 | 0     | 0.92 | 0.07 | 0 |
|     | 1.88 | 0.39 | 0     | 1.07 | 0.31 | 0 |
|     | 2.22 | 3.19 | 0     | 0.95 | 0.23 | 0 |
|     | 1.06 | 0.23 | 1     | 0.95 | 0.4  | 0 |
|     | 1.85 | 0.41 | 0     | 0.99 | 0.18 | 0 |
|     | 1.63 | 0.7  | 0     | 1.12 | 0.25 | 0 |
|     | 1.72 | 0.16 | 0     | 1.12 | 0.2  | 0 |
|     | 1.71 | 0.4  | 0     | 1.01 | 0.44 | 0 |
|     | 1.37 | 0.4  | 0     | 1.09 | 0.3  | 0 |
|     | 1.06 | 0.32 | 1     | 1.04 | 0.18 | 0 |
|     | 1.27 | 0.2  | 1     | 1.13 | 0.26 | 0 |
|     | 2.2  | 0.81 | 0     | 1.28 | 0.52 | 0 |
|     | 1.93 | 0.58 | 0     | 1.01 | 0.31 | 0 |
|     | 1.97 | 0.26 | 0     | 1.2  | 0.23 | 0 |
|     | 1.13 | 0.18 | 1     | 1.17 | 0.32 | 0 |
|     | 1.24 | 0.46 | 1     | 0.82 | 0.22 | 0 |
| n/a | n/a  |      | 0 n/a | n/a  |      | 0 |
|     | 1.57 | 0.3  | 0     | 0.79 | 0.1  | 0 |
|     | 1.38 | 0.39 | 0     | 0.99 | 0.22 | 0 |
|     | 0.73 | 0.23 | 1     | 0.62 | 0.34 | 1 |
|     | 1.93 | 0.13 | 0     | 0.93 | 0.25 | 0 |

|     |      |      |       |      |      |   |
|-----|------|------|-------|------|------|---|
|     |      |      | 1     | 0.76 | 0.18 | 0 |
|     | 0.12 | 0.04 | 1     | 0.82 | 0.28 | 1 |
|     | 1.75 | 0.86 | 0     | 0.84 | 0.42 | 0 |
|     | 1.36 | 0.25 | 0     | 0.99 | 0.2  | 0 |
|     | 0.8  | 0.27 | 1     | 1.21 | 0.52 | 0 |
|     | 1.29 | 1.03 | 0     | 0.88 | 0.27 | 0 |
|     | 1.7  | 0.26 | 0     | 0.92 | 0.15 | 0 |
|     | 1.31 | 0.34 | 1     | 1.01 | 0.38 | 0 |
|     | 2.22 | 0.6  | 0     | 1.16 | 0.52 | 0 |
|     | 1.27 | 0.67 | 1     | 1.06 | 0.26 | 0 |
|     | 0.68 | 0.11 | 1     | 0.99 | 0.19 | 0 |
|     | 2.69 | 0.82 | 0     | 1.06 | 0.26 | 0 |
|     | 1.32 | 0.6  | 0     | 1.04 | 0.53 | 0 |
|     | 2.42 | 0.8  | 1     | 0.98 | 0.14 | 0 |
|     | 2.26 | 0.3  | 0     | 0.91 | 0.2  | 0 |
|     | 0.37 | 0.03 | 1     | 0.82 | 0.43 | 1 |
|     | 1.67 | 0.22 | 0     | 0.89 | 0.11 | 0 |
|     |      |      | 1     | 0.84 | 0.58 | 1 |
|     | 1.03 | 0.46 | 1     | 0.88 | 0.16 | 0 |
|     | 1.86 | 0.3  | 0     | 1.15 | 0.25 | 0 |
| n/a | n/a  |      | 0 n/a | n/a  |      | 0 |
|     | 0.81 | 0.15 | 1     | 0.99 | 0.26 | 0 |
|     | 1.6  | 0.97 | 1     | 1.13 | 0.18 | 0 |
|     | 1.43 | 0.35 | 1     | 1.07 | 0.47 | 0 |
|     | 1.23 | 0.16 | 1     | 1.17 | 0.16 | 0 |
|     | 1.8  | 0.37 | 1     | 1.19 | 0.35 | 0 |
|     | 2.13 | 0.57 | 0     | 0.93 | 0.18 | 0 |
|     | 0.35 | 0.02 | 1     | 0.92 | 0.38 | 1 |
|     | 1.92 | 0.31 | 0     | 0.99 | 0.18 | 0 |
| n/a | n/a  |      | 0 n/a | n/a  |      | 0 |
| n/a | n/a  |      | 0 n/a | n/a  |      | 0 |
|     |      |      | 1     | 0.89 | 0.28 | 1 |
|     | 0.98 | 0.03 | 1     | 0.69 | 0.4  | 0 |
|     | 0.72 | 0.13 | 1     | 0.78 | 0.32 | 1 |
|     | 0.4  | 0.02 | 1     | 0.85 | 0.33 | 1 |
|     | 0.22 | 0.04 | 1     | 1.19 | 0.59 | 1 |
|     | 1.47 | 0.21 | 0     | 1.13 | 0.42 | 0 |
|     | 0.83 | 0.62 | 1     | 0.88 | 0.38 | 0 |
| n/a | n/a  |      | 0 n/a | n/a  |      | 0 |
|     | 2.03 | 0.24 | 0     | 1.05 | 0.34 | 0 |
|     | 1.59 | 0.2  | 0     | 0.96 | 0.25 | 0 |
|     | 1.25 | 0.79 | 0     | 0.97 | 0.3  | 0 |
|     | 0.78 | 0.17 | 1     | 0.9  | 0.44 | 0 |
|     | 0.67 | 0.11 | 1     | 1.24 | 1.44 | 0 |
| n/a | n/a  |      | 0 n/a | n/a  |      | 0 |
|     | 1.65 | 0.4  | 0     | 1.04 | 0.55 | 0 |
| n/a | n/a  |      | 0 n/a | n/a  |      | 0 |
| n/a | n/a  |      | 0 n/a | n/a  |      | 0 |
|     | 1.5  | 0.41 | 0     | 0.87 | 0.25 | 0 |
|     |      |      | 0     | 0.92 | 0.48 | 0 |
|     | 1.51 | 0.28 | 1     | 1.21 | 0.26 | 0 |
|     | 1.75 | 0.5  | 0     | 0.97 | 0.38 | 0 |

|     |      |      |     |      |      |   |
|-----|------|------|-----|------|------|---|
| n/a | n/a  | 0    | n/a | n/a  | 0    |   |
| n/a | n/a  | 0    | n/a | n/a  | 0    |   |
| n/a | n/a  | 0    | n/a | n/a  | 0    |   |
|     | 2.36 | 0.4  | 0   | 0.96 | 0.22 | 0 |
|     | 0.39 | 0.05 | 1   | 3.37 | 1.65 | 1 |
|     | 1.63 | 0.19 | 0   | 1.04 | 0.25 | 0 |
|     | 1.31 | 0.26 | 0   | n/a  | n/a  | 0 |
| n/a | n/a  | 0    | n/a | n/a  | n/a  | 0 |
|     | 1.63 | 0.21 | 0   | 1.11 | 0.18 | 0 |
| n/a | n/a  | 0    | n/a | n/a  | n/a  | 0 |
| n/a | n/a  | 0    | n/a | n/a  | n/a  | 0 |
| n/a | n/a  | 0    | n/a | n/a  | n/a  | 0 |
| n/a | n/a  | 0    | n/a | n/a  | n/a  | 0 |
| n/a | n/a  | 0    | n/a | n/a  | n/a  | 0 |
|     | 2.23 | 0.82 | 0   | 1.02 | 0.25 | 0 |
| n/a | n/a  | 0    | n/a | n/a  | n/a  | 0 |
|     | 1.65 | 0.15 | 0   | 0.87 | 0.22 | 0 |
|     | 1.51 | 0.23 | 0   | 1    | 0.45 | 0 |
|     | 1.39 | 0.16 | 1   | 0.96 | 0.18 | 0 |
|     | 1.94 | 0.17 | 0   | 0.96 | 0.29 | 0 |
|     |      |      | 0   | 1.01 | 0.33 | 0 |
|     | 0.93 | 0.26 | 1   | 1.16 | 0.41 | 0 |
|     | 1.16 | 0.45 | 0   | 1.07 | 0.2  | 0 |
|     | 1.03 | 0.47 | 1   | 0.97 | 0.35 | 0 |
| n/a | n/a  | 0    | n/a | n/a  | n/a  | 0 |
| n/a | n/a  | 0    | n/a | n/a  | n/a  | 0 |
|     | 1.55 | 0.1  | 0   | 1.27 | 0.47 | 0 |
|     | 2.4  | 0.2  | 0   | 1.1  | 0.38 | 0 |
|     | 0.5  | 0.11 | 1   | 0.87 | 0.83 | 1 |
|     | 1.61 | 0.73 | 0   | 0.97 | 0.17 | 0 |
|     | 2.04 | 0.13 | 0   | 1.11 | 0.1  | 0 |
|     | 1.35 | 0.25 | 0   | 0.88 | 0.23 | 0 |
|     | 1.42 | 0.2  | 0   | 0.92 | 0.17 | 0 |
|     | 1.41 | 0.39 | 0   | 1.99 | 0.5  | 0 |
|     | 1.98 | 1.06 | 0   | 0.91 | 0.21 | 0 |
|     | 1.74 | 0.37 | 0   | 0.8  | 0.37 | 0 |
|     | 1.95 | 0.74 | 0   | 0.99 | 0.18 | 0 |
|     | 1.64 | 0.36 | 0   | 0.85 | 0.25 | 0 |
|     | 1.61 | 0.29 | 0   | 2.32 | 0.88 | 0 |
|     | 1.41 | 1.17 | 0   | 0.94 | 0.17 | 0 |
|     | 0.71 | 0.46 | 1   | 0.98 | 0.45 | 0 |
|     | 1.56 | 0.37 | 1   | 0.99 | 0.07 | 0 |
|     | 1.56 | 0.55 | 0   | 0.87 | 0.3  | 0 |
|     | 1.97 | 0.33 | 0   | 0.87 | 0.35 | 0 |
|     | 1.97 | 0.75 | 0   | 1.02 | 0.29 | 0 |
|     | 2.16 | 0.25 | 0   | 1.01 | 0.25 | 0 |
|     | 2.01 | 0.62 | 0   | 0.9  | 0.19 | 0 |
|     | 1.81 | 0.04 | 0   | 3.6  | 1.19 | 0 |
|     | 1.09 | 0.25 | 1   | 1.35 | 0.35 | 0 |
|     | 1.35 | 0.45 | 1   | 1.46 | 0.62 | 0 |
|     | 1.41 | 0.37 | 0   | 1.12 | 0.31 | 0 |

|     |      |      |       |      |      |   |
|-----|------|------|-------|------|------|---|
|     | 1.25 | 0.37 | 0     | 0.98 | 0.3  | 0 |
|     | 1.67 | 0.45 | 1     | 0.87 | 0.27 | 0 |
|     | 1.98 | 0.76 | 0     | 0.81 | 0.19 | 0 |
|     | 1.46 | 0.58 | 0     | 1.05 | 0.27 | 0 |
|     | 1.09 | 0.16 | 0     | 0.92 | 0.46 | 0 |
| n/a | n/a  |      | 0 n/a | n/a  |      | 0 |
| n/a | n/a  |      | 0 n/a | n/a  |      | 0 |
| n/a | n/a  |      | 0 n/a | n/a  |      | 0 |
| n/a | n/a  |      | 0 n/a | n/a  |      | 0 |
| n/a | n/a  |      | 0 n/a | n/a  |      | 0 |
| n/a | n/a  |      | 0 n/a | n/a  |      | 0 |
|     | 1.75 | 0.33 | 0     | 0.74 | 0.27 | 0 |
|     | 1.73 | 0.18 | 0     | 0.91 | 0.2  | 0 |
|     | 1.33 | 0.47 | 0     | 1    | 0.36 | 0 |
|     | 1.25 | 0.32 | 0     | 0.86 | 0.13 | 0 |
|     | 1.42 | 0.39 | 0     | 0.89 | 0.17 | 0 |
|     | 1.1  | 0.46 | 0     | 1.02 | 0.25 | 0 |
|     | 1.7  | 0.86 | 0     | 0.94 | 0.3  | 0 |
|     | 1.31 | 0.16 | 0     | 0.96 | 0.31 | 0 |
|     | 1.47 | 0.21 | 0     | 0.99 | 0.29 | 0 |
| n/a | n/a  |      | 0 n/a | n/a  |      | 0 |
| n/a | n/a  |      | 0 n/a | n/a  |      | 0 |
|     | 1.84 | 1.03 | 0     | 0.84 | 0.22 | 0 |
|     | 0.95 | 0.39 | 0     | 0.79 | 0.21 | 0 |
|     | 1.7  | 0.44 | 0     | 1.03 | 0.3  | 0 |
|     | 0.78 | 0.05 | 1     | 0.92 | 0.54 | 0 |
|     | 1.27 | 0.49 | 0     | 1.05 | 0.1  | 0 |
|     | 2.31 | 0.52 | 0     | 0.98 | 2.44 | 0 |
|     | 2.63 | 0.81 | 0     | 0.97 | 0.29 | 0 |
|     | 1.81 | 0.59 | 0     | 0.87 | 0.37 | 0 |
|     | 1.99 | 0.59 | 0     | 0.9  | 0.11 | 0 |
|     | 1.67 | 0.92 | 0     | 0.93 | 0.17 | 0 |
| n/a | n/a  |      | 0 n/a | n/a  |      | 0 |
| n/a | n/a  |      | 0 n/a | n/a  |      | 0 |
|     | 1.62 | 0.14 | 0     | 0.94 | 0.13 | 0 |
|     | 2.41 | 0.57 | 0     | 1.14 | 0.29 | 0 |
| n/a | n/a  |      | 0 n/a | n/a  |      | 0 |
| n/a | n/a  |      | 0 n/a | n/a  |      | 0 |
|     | 0.86 | 0.38 | 1     | 0.95 | 0.33 | 0 |
|     | 1.26 | 0.48 | 0     | 0.78 | 0.23 | 0 |
|     | 1.06 | 0.21 | 1     | 0.93 | 0.2  | 0 |
|     | 1.19 | 0.27 | 0     | 1.01 | 0.12 | 0 |
|     | 1.53 | 1.28 | 0     | 0.92 | 0.27 | 0 |
|     | 0.08 | 0.02 | 1     | 0.81 | 0.17 | 1 |
|     | 1.58 | 0.17 | 0     | 0.89 | 0.29 | 0 |
|     | 0.13 | 0.04 | 1     | 0.71 | 0.41 | 1 |
|     | 1.54 | 0.41 | 0     | 0.83 | 0.25 | 0 |
|     | 1.7  | 0.24 | 0     | 0.81 | 0.33 | 0 |
|     | 1.56 | 0.14 | 0     | 0.97 | 0.17 | 0 |
|     | 1.49 | 0.05 | 0     | 0.96 | 0.4  | 0 |
|     | 2.21 | 0.28 | 0     | 0.98 | 0.51 | 0 |
| n/a | n/a  |      | 0 n/a | n/a  |      | 0 |

|      |      |   |      |      |   |
|------|------|---|------|------|---|
| n/a  | n/a  | 0 | n/a  | n/a  | 0 |
| 1.92 | 0.52 | 0 | 0.89 | 0.39 | 0 |
| 1.59 | 0.4  | 0 | 1.06 | 0.25 | 0 |
| 1.03 | 0.12 | 1 | 0.91 | 0.63 | 0 |
| 1.81 | 1.73 | 0 | 1.12 | 0.24 | 0 |
|      |      | 0 | 0.99 | 0.4  | 0 |
| 0.82 | 0.34 | 1 | 0.9  | 0.24 | 0 |
| 2.1  | 0.3  | 0 | 0.76 | 0.38 | 0 |
| 0.31 | 0.06 | 1 | 1.16 | 0.41 | 0 |
| 0.65 | 0.09 | 1 | 0.87 | 0.28 | 0 |
| 1.61 | 0.54 | 0 | 1.13 | 0.22 | 0 |
| 1.77 | 0.52 | 0 | 0.97 | 0.25 | 0 |
| 1.51 | 0.28 | 0 | 0.95 | 0.35 | 0 |
| n/a  | n/a  | 0 | n/a  | n/a  | 0 |
| 1.29 | 0.25 | 0 | 0.91 | 0.18 | 0 |
| 0.41 | 0.04 | 1 | 0.93 | 0.46 | 0 |
| n/a  | n/a  | 0 | n/a  | n/a  | 0 |
| n/a  | n/a  | 0 | n/a  | n/a  | 0 |
| n/a  | n/a  | 0 | n/a  | n/a  | 0 |
| 1.29 | 0.13 | 1 | 0.95 | 0.46 | 0 |
| 1.16 | 0.87 | 0 | 0.96 | 0.23 | 0 |
| 1.57 | 1.91 | 0 | 0.99 | 0.48 | 0 |
| n/a  | n/a  | 0 | n/a  | n/a  | 0 |
| 1.19 | 0.27 | 1 | 1.01 | 0.31 | 0 |
| 1    | 0.19 | 1 | 1.06 | 0.25 | 0 |
| n/a  | n/a  | 0 | n/a  | n/a  | 0 |
| 2.01 | 0.33 | 0 | 0.9  | 0.11 | 0 |
| 1.28 | 0.29 | 1 | 1.06 | 0.51 | 0 |
| 1.46 | 0.26 | 1 | 0.8  | 0.27 | 0 |
| 1.49 | 0.72 | 0 | 1.15 | 0.43 | 0 |
| 1.29 | 0.49 | 0 | 0.95 | 0.27 | 0 |
| 1.63 | 0.3  | 0 | 0.96 | 0.25 | 0 |
| 1.51 | 0.66 | 0 | 0.89 | 0.27 | 0 |
| 2.14 | 0.48 | 0 | 0.81 | 0.21 | 0 |
| 1.75 | 0.17 | 1 | 0.75 | 0.16 | 0 |
| 1.79 | 0.66 | 0 | 1.24 | 0.27 | 0 |
| 0.9  | 0.1  | 1 | 0.9  | 0.31 | 0 |
| 1.39 | 0.57 | 0 | 0.85 | 0.2  | 0 |
| 1.35 | 0.45 | 1 | 1.05 | 0.24 | 0 |
| 1.53 | 0.42 | 1 | 0.81 | 0.31 | 0 |
| 0.64 | 0.17 | 1 | 0.87 | 0.33 | 0 |
| 1.99 | 1.05 | 0 | 1.06 | 0.24 | 0 |
| 0.96 | 0.16 | 1 | 1.06 | 0.3  | 0 |
| 1.4  | 1.03 | 0 | 0.78 | 0.27 | 0 |
| 1.26 | 0.22 | 0 | 0.68 | 0.37 | 0 |
| 1.6  | 0.21 | 0 | 0.91 | 0.14 | 0 |
| 0.96 | 0.13 | 1 | 5.31 | 1.73 | 1 |
|      |      | 0 | 0.96 | 0.23 | 0 |
| 1.5  | 0.18 | 1 | 0.8  | 0.3  | 0 |
| 2.15 | 0.8  | 0 | 0.78 | 0.14 | 0 |
| 2    | 0.09 | 0 | 0.95 | 0.28 | 0 |
| 0.92 | 0.47 | 1 | 1.03 | 0.65 | 0 |

|     |      |      |   |      |      |   |
|-----|------|------|---|------|------|---|
|     | 2.16 | 0.26 | 0 | 0.78 | 0.22 | 0 |
|     | 1.32 | 0.06 | 0 | 0.92 | 0.23 | 0 |
|     | 1.75 | 0.44 | 0 | 0.86 | 0.28 | 0 |
| n/a | n/a  |      | 0 | n/a  | n/a  | 0 |
|     | 1.38 | 0.12 | 0 | 1    | 0.4  | 0 |
|     | 1.11 | 0.11 | 0 | 1.07 | 0.2  | 0 |
|     | 0.93 | 0.2  | 1 | 0.94 | 0.18 | 0 |
|     | 1.72 | 0.22 | 0 | 1.06 | 0.29 | 0 |
|     | 1.81 | 0.42 | 0 | 0.89 | 0.46 | 0 |
|     | 1.97 | 0.42 | 1 | 0.93 | 0.28 | 0 |
|     | 2.68 | 0.7  | 0 | 0.96 | 0.41 | 0 |
|     | 0.49 | 0.22 | 1 | 1.03 | 0.35 | 1 |
|     | 0.27 | 0.04 | 1 | 0.48 | 0.27 | 1 |
|     | 2.03 | 0.75 | 0 | 0.95 | 0.18 | 0 |
|     | 1.95 | 0.9  | 0 | 0.76 | 0.19 | 0 |
|     | 1.61 | 0.84 | 0 | 0.92 | 0.22 | 0 |
|     | 2.24 | 0.28 | 0 | 0.89 | 0.15 | 0 |
|     | 0.69 | 0.11 | 1 | 1.16 | 0.45 | 0 |
|     |      |      | 0 | 1.05 | 0.08 | 0 |
|     | 1.26 | 0.24 | 0 | 0.69 | 0.41 | 0 |
|     | 1.83 | 0.93 | 0 | 1.05 | 0.3  | 0 |
|     | 0.69 | 0.15 | 1 | 0.86 | 0.18 | 0 |
|     |      |      | 1 | 4.15 | 0.81 | 0 |
|     | 2.26 | 0.55 | 0 | 0.88 | 0.34 | 0 |
|     |      |      | 1 | 1.54 | 0.54 | 0 |
|     | 1.19 | 0.05 | 1 | 0.91 | 0.19 | 0 |
|     | 1.01 | 0.14 | 1 | 0.88 | 0.32 | 0 |
|     | 0.32 | 0.05 | 1 | 1.2  | 0.28 | 0 |
|     | 1.6  | 0.7  | 0 | 0.93 | 0.3  | 0 |
|     | 1.11 | 0.21 | 0 | 0.94 | 0.24 | 0 |
| n/a | n/a  |      | 0 | n/a  | n/a  | 0 |
|     | 1.38 | 0.73 | 0 | 0.96 | 0.29 | 0 |
|     | 0.6  | 0.03 | 1 | 0.97 | 0.21 | 0 |
|     |      |      | 1 | 1.3  | 0.52 | 0 |
|     | 0.32 | 0.06 | 1 | 1.37 | 0.53 | 1 |
|     | 0.27 | 0.35 | 1 | 0.69 | 0.34 | 1 |
|     | 0.78 | 0.2  | 1 | 0.91 | 0.32 | 0 |
|     | 1.52 | 0.4  | 0 | 0.95 | 0.23 | 0 |
|     | 1.64 | 1.94 | 0 | 0.96 | 0.12 | 0 |
|     | 1.87 | 0.41 | 0 | 0.95 | 0.44 | 0 |
|     | 2.59 | 3.96 | 0 | 0.96 | 0.4  | 0 |
|     | 1.69 | 0.52 | 0 | 0.9  | 0.4  | 0 |
|     |      |      | 0 | 0.83 | 0.21 | 0 |
|     | 1.77 | 0.09 | 0 | 0.86 | 0.44 | 0 |
|     | 0.69 | 0.28 | 1 | 0.98 | 0.4  | 0 |
|     | 1.46 | 4.08 | 0 | 0.84 | 0.21 | 0 |
|     | 1.42 | 0.62 | 0 | 0.94 | 0.32 | 0 |
|     | 1.48 | 0.14 | 1 | 0.8  | 0.56 | 0 |
|     | 0.5  | 0.12 | 1 | 0.92 | 0.32 | 0 |
|     | 1.89 | 1.93 | 0 | 1.05 | 0.28 | 0 |
|     | 1.87 | 0.47 | 0 | 1.25 | 0.26 | 0 |
|     | 1.5  | 0.49 | 0 | 0.86 | 0.15 | 0 |



|      |      |   |      |      |   |
|------|------|---|------|------|---|
| 1.76 | 0.09 | 0 | 1.07 | 0.43 | 0 |
| 1.48 | 0.06 | 1 | 1.42 | 0.87 | 1 |
| 1.51 | 0.55 | 0 | 1    | 0.1  | 0 |
| 1.75 | 0.29 | 0 | 0.94 | 0.26 | 0 |
| 1.46 | 0.81 | 0 | 0.99 | 0.3  | 0 |
| 0.92 | 0.08 | 1 | 0.98 | 0.51 | 0 |
| 0.36 | 0.11 | 1 | 1.62 | 0.4  | 0 |
| 1.44 | 0.18 | 0 | 0.89 | 0.29 | 0 |
| 3.12 | 3.91 | 1 | 0.86 | 0.29 | 0 |
|      |      | 1 | 1.13 | 0.41 | 0 |
| 0.81 | 0.12 | 1 | 1.1  | 0.32 | 0 |
| 1.73 | 0.22 | 0 | 0.98 | 0.31 | 0 |
| 1.13 | 0.24 | 1 | 0.93 | 0.14 | 0 |
| 0.12 | 0.03 | 1 | 0.9  | 0.31 | 1 |
| 0.53 | 0.1  | 1 | 1.44 | 0.61 | 1 |
|      |      | 0 | 0.99 | 0.51 | 0 |
| 0.89 | 0.12 | 1 | 1.04 | 0.31 | 0 |
| 1.79 | 0.49 | 0 | 0.96 | 0.38 | 0 |
| 1.55 | 0.46 | 0 | 0.83 | 0.24 | 0 |
|      |      | 1 | 0.97 | 0.14 | 0 |
| 1.51 | 0.91 | 0 | 0.95 | 0.1  | 0 |
| 0.71 | 0.06 | 1 | 1.16 | 0.38 | 0 |
|      |      | 0 | 0.84 | 0.42 | 0 |
| 1.54 | 0.17 | 1 | 1.03 | 0.38 | 0 |
| 1.5  | 0.59 | 0 | 1.03 | 0.26 | 0 |
| 2.09 | 0.73 | 0 | 1.07 | 0.21 | 0 |
| 2.35 | 0.92 | 0 | 0.97 | 0.2  | 0 |
| 2.61 | 0.81 | 0 | 0.75 | 0.2  | 0 |
| 1.2  | 0.22 | 0 | 1.11 | 0.28 | 0 |
| 0.32 | 0.04 | 1 | 0.99 | 0.24 | 0 |
| 1.61 | 0.51 | 0 | 1.09 | 0.21 | 0 |
| 1.51 | 0.33 | 0 | 0.94 | 0.23 | 0 |
| 1.54 | 1.41 | 0 | 0.93 | 0.33 | 0 |
| 1.19 | 0.41 | 1 | 1.05 | 0.15 | 0 |
| 1.18 | 0.5  | 0 | 1.07 | 0.58 | 0 |
| n/a  | n/a  | 0 | n/a  | n/a  | 0 |
|      |      | 1 | 1.15 | 0.26 | 0 |
| 1.84 | 0.29 | 0 | 1.01 | 0.31 | 0 |
| 3.07 | 0.28 | 1 | 2.2  | 0.36 | 0 |
|      |      | 1 | 1.07 | 0.42 | 0 |
| n/a  | n/a  | 0 | n/a  | n/a  | 0 |
| 1.64 | 0.72 | 0 | 0.97 | 2.53 | 0 |
| 1.62 | 0.18 | 1 | 1.14 | 0.14 | 0 |
| 2.02 | 0.48 | 0 | 1.14 | 0.33 | 0 |
| 1.49 | 0.4  | 0 | 1.03 | 0.45 | 0 |
| 0.75 | 0.13 | 1 | 0.85 | 0.35 | 0 |
| 1.79 | 0.17 | 0 | 0.99 | 0.3  | 0 |
| 2.41 | 0.76 | 0 | 0.99 | 0.38 | 0 |
| 1.49 | 0.63 | 0 | 0.9  | 0.13 | 0 |
| 1.81 | 0.33 | 0 | 0.83 | 0.44 | 0 |
| 1.85 | 0.25 | 0 | 0.78 | 0.52 | 0 |
| 1.94 | 0.66 | 0 | 0.99 | 0.11 | 0 |

|     |      |      |   |      |      |   |
|-----|------|------|---|------|------|---|
|     | 1.47 | 0.36 | 0 | 1.2  | 0.22 | 0 |
|     | 1.79 | 0.41 | 0 | 0.86 | 0.16 | 0 |
|     | 1.25 | 0.33 | 1 | 1.16 | 0.21 | 0 |
|     | 1.34 | 0.16 | 0 | 0.84 | 0.3  | 0 |
| n/a | n/a  |      | 0 | n/a  | n/a  | 0 |
|     | 1.28 | 0.31 | 0 | 1.01 | 0.32 | 0 |
|     | 5.43 | 1.34 | 1 | 9.75 | 1.54 | 1 |
|     | 1.76 | 1.21 | 0 | 1.02 | 0.23 | 0 |
|     | 1.81 | 0.91 | 0 | 0.83 | 0.27 | 0 |
|     | 1.02 | 0.26 | 1 | 0.91 | 0.32 | 0 |
|     | 0.28 | 0.08 | 1 | 0.9  | 0.33 | 0 |
|     | 2.35 | 0.6  | 0 | 0.93 | 0.27 | 0 |
|     | 1.15 | 0.08 | 1 | 0.84 | 0.3  | 0 |
|     | 1.59 | 0.21 | 1 | 1.08 | 0.26 | 0 |
|     | 1.55 | 0.58 | 0 | 0.95 | 0.12 | 0 |
|     | 1.7  | 0.29 | 0 | 0.92 | 0.24 | 0 |
|     |      |      | 1 | 1.08 | 0.19 | 0 |
| n/a | n/a  |      | 0 | n/a  | n/a  | 0 |
|     | 1.94 | 0.75 | 0 | 0.7  | 0.14 | 0 |
|     | 1.25 | 0.39 | 0 | 0.95 | 0.6  | 0 |
|     | 1.28 | 0.22 | 1 | 1.02 | 0.45 | 0 |
|     | 1.11 | 0.46 | 0 | 0.93 | 0.32 | 0 |
| n/a | n/a  |      | 0 | n/a  | n/a  | 0 |
|     | 1.36 | 0.44 | 0 | 1.2  | 0.43 | 0 |
|     | 2.3  | 0.79 | 0 | 0.74 | 0.22 | 0 |
|     | 1.55 | 0.59 | 0 | 0.91 | 0.19 | 0 |
|     | 1.81 | 0.27 | 0 | 0.98 | 0.32 | 0 |
| n/a | n/a  |      | 0 | n/a  | n/a  | 0 |
|     | 1.16 | 0.13 | 0 | 0.93 | 0.13 | 0 |
|     | 1.45 | 0.84 | 1 | 0.97 | 0.19 | 0 |
|     | 1.59 | 0.29 | 0 | 1.03 | 0.26 | 0 |
|     | 1.37 | 0.15 | 1 | 1.28 | 0.49 | 0 |
|     | 1.37 | 0.19 | 1 | 1.21 | 0.31 | 0 |
|     | 1.1  | 0.06 | 0 | 0.84 | 0.21 | 0 |
|     | 1.66 | 1.21 | 0 | 1.08 | 0.12 | 0 |
|     | 2.29 | 0.54 | 0 | 0.96 | 0.45 | 0 |
|     | 2.1  | 0.72 | 0 | 1.07 | 0.39 | 0 |
|     | 1.09 | 0.05 | 1 | 0.85 | 0.24 | 0 |
|     | 1.66 | 0.33 | 0 | 0.74 | 0.16 | 0 |
|     | 1.61 | 0.15 | 1 | 0.86 | 0.22 | 0 |
|     | 1.61 | 0.84 | 0 | 1    | 0.78 | 0 |
|     | 2.2  | 1.13 | 0 | 0.88 | 0.18 | 0 |
|     | 1.18 | 0.29 | 1 | 0.92 | 0.25 | 0 |
|     | 1.19 | 0.07 | 1 | 1.01 | 0.25 | 0 |
|     | 1.32 | 0.06 | 1 | 1.23 | 0.5  | 0 |
|     | 0.8  | 0.2  | 1 | 1.3  | 0.51 | 0 |
|     | 1.87 | 0.19 | 0 | 1.01 | 0.15 | 0 |
|     | 2.03 | 0.84 | 0 | 0.99 | 0.26 | 0 |
|     | 1.47 | 1.04 | 0 | 0.87 | 0.32 | 0 |
|     | 0.5  | 0.08 | 1 | 0.64 | 0.3  | 0 |
|     | 1.75 | 0.4  | 1 | 1    | 0.43 | 0 |
|     | 1.34 | 0.71 | 0 | 0.98 | 0.14 | 0 |

|     |      |      |       |      |      |   |
|-----|------|------|-------|------|------|---|
|     | 1.44 | 0.73 | 0     | 0.8  | 0.23 | 0 |
| n/a | n/a  |      | 0 n/a | n/a  |      | 0 |
|     | 1.59 | 0.45 | 0     | 2.73 | 1    | 0 |
|     | 1.7  | 0.44 | 0     | 0.89 | 0.42 | 0 |
| n/a | n/a  |      | 0 n/a | n/a  |      | 0 |
|     | 1.15 | 0.51 | 1     | 1.2  | 0.46 | 0 |
|     | 1.54 | 0.47 | 1     | 1.11 | 0.24 | 0 |
|     | 1.6  | 0.41 | 0     | 0.98 | 0.62 | 0 |
|     | 2.17 | 0.54 | 0     | 1.2  | 0.19 | 0 |
|     | 1.33 | 0.05 | 0     | 1    | 0.16 | 0 |
|     |      |      | 1     | 0.93 | 0.15 | 0 |
|     | 1.65 | 1.03 | 0     | 0.86 | 0.33 | 0 |
|     | 1.67 | 0.53 | 0     | 0.81 | 0.22 | 0 |
|     | 1.6  | 0.36 | 0     | 0.93 | 0.43 | 0 |
| n/a | n/a  |      | 0 n/a | n/a  |      | 0 |
|     | 1.13 | 0.51 | 1     | 1.08 | 0.23 | 0 |
|     | 1.64 | 0.48 | 0     | 0.89 | 0.17 | 0 |
| n/a | n/a  |      | 0 n/a | n/a  |      | 0 |
|     | 1.25 | 0.19 | 1     | 1.08 | 0.19 | 0 |
| n/a | n/a  |      | 0 n/a | n/a  |      | 0 |
|     | 1.39 | 1.72 | 0     | 1.33 | 0.58 | 0 |
| n/a | n/a  |      | 0 n/a | n/a  |      | 0 |
| n/a | n/a  |      | 0 n/a | n/a  |      | 0 |
| n/a | n/a  |      | 0 n/a | n/a  |      | 0 |
| n/a | n/a  |      | 0 n/a | n/a  |      | 0 |
| n/a | n/a  |      | 0 n/a | n/a  |      | 0 |
| n/a | n/a  |      | 0 n/a | n/a  |      | 0 |
| n/a | n/a  |      | 0 n/a | n/a  |      | 0 |
|     |      |      | 1     | 1.3  | 0.26 | 0 |
|     | 1.11 | 0.63 | 0     | 1.05 | 0.2  | 0 |
|     | 1.76 | 0.37 | 0     | 1.05 | 0.41 | 0 |
|     | 1.64 | 0.29 | 0     | 0.98 | 0.14 | 0 |
|     | 1.62 | 0.54 | 0     | 0.92 | 0.26 | 0 |
|     | 0.68 | 0.11 | 1     | 0.77 | 0.54 | 1 |
|     | 1.46 | 0.4  | 1     | 1.19 | 0.31 | 0 |
| n/a | n/a  |      | 0 n/a | n/a  |      | 0 |
| n/a | n/a  |      | 0 n/a | n/a  |      | 0 |
|     | 1.01 | 0.69 | 0     | 1.12 | 0.19 | 0 |
| n/a | n/a  |      | 0 n/a | n/a  |      | 0 |
|     | 2.02 | 0.26 | 0     | 0.95 | 0.43 | 0 |
|     | 0.67 | 0.18 | 1     | 0.86 | 0.36 | 1 |
|     | 0.85 | 0.36 | 1     | 2.27 | 0.47 | 0 |
|     | 1.34 | 0.56 | 0     | 1.11 | 0.3  | 0 |
|     | 1.61 | 0.55 | 0     | 1.04 | 0.4  | 0 |
|     | 1.53 | 0.3  | 0     | 0.77 | 0.11 | 0 |
|     | 2.35 | 0.49 | 0     | 1.02 | 0.22 | 0 |
|     | 1.52 | 0.26 | 0     | 1    | 0.3  | 0 |
|     | 1.32 | 0.49 | 1     | 1.68 | 0.45 | 1 |
|     | 1.56 | 0.15 | 0     | 0.86 | 0.12 | 0 |
|     | 2.3  | 0.74 | 0     | 0.86 | 0.29 | 0 |
|     | 2.15 | 0.45 | 0     | 0.83 | 0.15 | 0 |
|     | 1.62 | 0.68 | 0     | 1    | 0.35 | 0 |

|     |      |      |       |      |      |   |
|-----|------|------|-------|------|------|---|
|     | 1.51 | 0.51 | 0     | 0.93 | 0.19 | 0 |
|     | 1.25 | 0.51 | 0     | 1    | 0.21 | 0 |
|     | 1.52 | 0.43 | 0     | 0.9  | 0.14 | 0 |
|     | 2.13 | 0.37 | 0     | 0.77 | 0.28 | 0 |
|     | 1.92 | 0.4  | 0     | 0.97 | 0.35 | 0 |
|     | 1.89 | 0.8  | 0     | 0.82 | 0.18 | 0 |
|     | 1.39 | 0.31 | 0     | 0.94 | 0.23 | 0 |
|     | 1.46 | 0.47 | 0     | 0.84 | 0.16 | 0 |
|     | 1.65 | 0.31 | 0     | 0.73 | 0.15 | 0 |
|     | 1.37 | 0.48 | 0     | 0.94 | 0.3  | 0 |
|     | 2.02 | 0.66 | 0     | 0.85 | 0.23 | 0 |
|     | 1.05 | 0.29 | 1     | 1.05 | 0.29 | 0 |
|     | 1.75 | 0.66 | 0     | 0.83 | 0.12 | 0 |
|     | 1.93 | 0.4  | 0     | 1.02 | 0.15 | 0 |
|     | 1.18 | 0.34 | 0     | 1.06 | 0.16 | 0 |
|     | 1.47 | 0.48 | 0     | 0.95 | 0.15 | 0 |
|     | 1.4  | 0.15 | 0     | 0.9  | 0.15 | 0 |
| n/a | n/a  |      | 0 n/a | n/a  |      | 0 |
| n/a | n/a  |      | 0 n/a | n/a  |      | 0 |
| n/a | n/a  |      | 0 n/a | n/a  |      | 0 |
| n/a | n/a  |      | 0 n/a | n/a  |      | 0 |
| n/a | n/a  |      | 0 n/a | n/a  |      | 0 |
| n/a | n/a  |      | 0 n/a | n/a  |      | 0 |
|     | 1.69 | 0.13 | 0     | 1.11 | 0.41 | 0 |
|     | 0.16 | 0.03 | 1     | 0.86 | 0.25 | 0 |
|     |      |      | 0     | 1.14 | 0.37 | 0 |
|     | 1.62 | 0.36 | 0     | 0.98 | 0.33 | 0 |
|     |      |      | 0     | 1.04 | 0.42 | 0 |
|     | 1.14 | 0.15 | 1     | 1.13 | 0.3  | 0 |
|     |      |      | 1     | 0.9  | 0.34 | 0 |
|     | 2.12 | 0.33 | 0     | 1.28 | 0.24 | 0 |
|     | 0.4  | 0.07 | 1     | 0.91 | 0.2  | 0 |
|     | 0.69 | 0.21 | 1     | 0.98 | 0.33 | 0 |
|     | 1.11 | 0.68 | 0     | 0.99 | 0.26 | 0 |
|     | 1.96 | 0.3  | 0     | 1.12 | 0.2  | 0 |
|     | 1.72 | 0.38 | 0     | 1.05 | 0.16 | 0 |
|     | 1.93 | 0.21 | 0     | 0.89 | 0.16 | 0 |
|     | 0.39 | 0.05 | 1     | 0.81 | 0.18 | 0 |
|     | 1.73 | 0.16 | 0     | 1.19 | 0.27 | 0 |
|     | 1.4  | 0.27 | 1     | 0.85 | 0.16 | 0 |
| n/a | n/a  |      | 0 n/a | n/a  |      | 0 |
|     | 1.19 | 2.02 | 0     | 0.82 | 0.23 | 0 |
|     | 1.52 | 0.25 | 0     | 1.26 | 0.21 | 0 |
|     | 1.6  | 0.45 | 0     | 1.01 | 0.18 | 0 |
|     | 1.2  | 0.31 | 0     | 0.96 | 0.29 | 0 |
| n/a | n/a  |      | 0 n/a | n/a  |      | 0 |
|     | 1.4  | 0.16 | 0     | 0.99 | 0.27 | 0 |
|     | 1.57 | 0.34 | 0     | 1.04 | 0.26 | 0 |
| n/a | n/a  |      | 0 n/a | n/a  |      | 0 |
|     | 1.6  | 0.63 | 0 n/a | n/a  |      | 0 |
|     | 1.37 | 0.05 | 0     | 0.99 | 0.44 | 0 |
|     | 1.61 | 0.33 | 0     | 1.02 | 0.17 | 0 |

|     |      |      |       |      |      |   |
|-----|------|------|-------|------|------|---|
|     | 1.08 | 0.1  | 1     | 0.94 | 0.22 | 0 |
|     | 1.85 | 0.61 | 0     | 0.86 | 0.37 | 0 |
|     | 2.19 | 0.43 | 0     | 0.81 | 0.29 | 0 |
|     | 2.23 | 0.27 | 0     | 1    | 0.29 | 0 |
|     | 0.44 | 0.02 | 1     | 0.98 | 0.29 | 1 |
|     | 1.23 | 0.45 | 1     | 1.02 | 0.5  | 0 |
|     | 1.08 | 0.17 | 1     | 0.84 | 0.19 | 0 |
|     | 0.73 | 0.16 | 1     | 0.95 | 0.43 | 0 |
|     | 1.94 | 0.56 | 0     | 0.98 | 0.14 | 0 |
| n/a | n/a  |      | 0 n/a | n/a  |      | 0 |
|     | 1.9  | 0.3  | 0     | 1.14 | 0.36 | 0 |
|     | 1.71 | 0.57 | 0     | 1.05 | 0.26 | 0 |
|     | 1.44 | 0.28 | 0     | 1.2  | 0.25 | 0 |
| n/a | n/a  |      | 0 n/a | n/a  |      | 0 |
| n/a | n/a  |      | 0 n/a | n/a  |      | 0 |
|     | 1.17 | 0.28 | 0     | 1.05 | 0.3  | 0 |
|     | 1.87 | 0.7  | 0     | 1.07 | 0.22 | 0 |
| n/a | n/a  |      | 0 n/a | n/a  |      | 0 |
|     | 2.2  | 0.15 | 0     | 0.81 | 0.29 | 0 |
|     | 0.49 | 0.11 | 1     | 1.07 | 0.24 | 0 |
| n/a | n/a  |      | 0 n/a | n/a  |      | 0 |
|     | 1.64 | 0.15 | 0     | 0.9  | 0.27 | 0 |
|     | 2.44 | 0.23 | 0     | 1.02 | 0.19 | 0 |
| n/a | n/a  |      | 0 n/a | n/a  |      | 0 |
| n/a | n/a  |      | 0 n/a | n/a  |      | 0 |
|     | 1.42 | 0.4  | 0     | 0.85 | 0.29 | 0 |
|     |      |      | 1     | 0.93 | 0.37 | 0 |
|     | 1.36 | 0.25 | 0     | 0.98 | 0.38 | 0 |
|     | 1.72 | 0.44 | 0     | 1.01 | 0.47 | 0 |
|     | 1.78 | 0.82 | 0     | 1.04 | 0.46 | 0 |
|     | 2.55 | 0.66 | 0     | 1.34 | 0.41 | 0 |
|     | 1.81 | 0.55 | 0     | 0.99 | 0.22 | 0 |
|     | 1.83 | 1.06 | 0     | 0.93 | 0.31 | 0 |
|     | 0.35 | 0.14 | 1     | 0.9  | 0.2  | 1 |
|     | 1.61 | 0.35 | 0     | 0.83 | 0.29 | 0 |
|     | 1.57 | 0.31 | 0     | 1.15 | 0.28 | 0 |
|     | 0.87 | 0.06 | 1     | 0.96 | 0.21 | 0 |
|     | 0.4  | 0.09 | 1     | 0.87 | 0.27 | 1 |
| n/a | n/a  |      | 0 n/a | n/a  |      | 0 |
|     | 1.23 | 0.25 | 0     | 0.83 | 0.27 | 0 |
|     | 3.51 | 0.93 | 1     | 1.13 | 0.58 | 0 |
|     | 1.71 | 0.2  | 0     | 1.03 | 0.29 | 0 |
|     | 0.37 | 0.06 | 1     | 0.83 | 0.27 | 0 |
|     | 1.92 | 0.61 | 0     | 0.93 | 0.24 | 0 |
|     | 1.58 | 0.6  | 0     | 0.74 | 0.19 | 0 |
|     | 1.74 | 0.32 | 1     | 0.85 | 0.23 | 0 |
|     | 2.02 | 0.37 | 0     | 0.92 | 0.09 | 0 |
|     | 1.98 | 0.63 | 0     | 1.37 | 0.32 | 0 |
| n/a | n/a  |      | 0 n/a | n/a  |      | 0 |
|     |      |      | 0     | 1.09 | 0.37 | 0 |
|     | 1.88 | 0.5  | 0     | 0.96 | 0.39 | 0 |
|     | 0.65 | 0.16 | 1     | 0.81 | 0.17 | 1 |

|     |      |      |   |      |      |   |
|-----|------|------|---|------|------|---|
|     | 1.92 | 0.27 | 0 | 1.01 | 0.16 | 0 |
| n/a | n/a  |      | 0 | n/a  | n/a  | 0 |
|     | 1.15 | 0.3  | 0 | 1.34 | 0.36 | 0 |
|     | 0.9  | 0.19 | 1 | 0.78 | 0.33 | 0 |
|     | 2.02 | 0.22 | 0 | 0.92 | 0.32 | 0 |
|     | 2.49 | 0.31 | 0 | 1.28 | 0.35 | 0 |
|     |      |      | 1 | 1.19 | 0.22 | 0 |
|     | 1.81 | 0.53 | 0 | 1.01 | 0.31 | 0 |
|     | 1.85 | 0.69 | 0 | 0.92 | 0.35 | 0 |
|     | 1.39 | 0.24 | 1 | 0.96 | 0.51 | 0 |
|     | 0.21 | 0.06 | 1 | 0.47 | 0.12 | 1 |
|     | 2.25 | 0.69 | 0 | 0.94 | 0.32 | 0 |
|     | 2.06 | 1.03 | 0 | 0.91 | 0.16 | 0 |
|     | 1.48 | 0.22 | 0 | 0.99 | 0.19 | 0 |
|     | 1.57 | 0.71 | 0 | 0.88 | 0.13 | 0 |
|     | 1.43 | 0.31 | 0 | 1.13 | 0.37 | 0 |
|     | 1.38 | 0.35 | 0 | 0.82 | 0.37 | 0 |
|     | 1.45 | 0.73 | 0 | 0.9  | 0.36 | 0 |
|     | 1.1  | 0.06 | 1 | 1.32 | 0.29 | 0 |
|     | 1.76 | 0.17 | 0 | 0.74 | 0.91 | 0 |
|     | 2.19 | 0.29 | 1 | 0.84 | 0.21 | 0 |
|     | 2.23 | 0.79 | 0 | 0.85 | 0.46 | 0 |
|     | 1.69 | 0.43 | 0 | 0.97 | 0.45 | 0 |
| n/a | n/a  |      | 0 | n/a  | n/a  | 0 |
|     | 1.41 | 0.23 | 0 | 1.08 | 0.23 | 0 |
|     | 1.63 | 2.67 | 0 | 0.67 | 0.37 | 0 |
|     | 2.57 | 0.7  | 0 | 1.01 | 0.17 | 0 |
|     | 1.42 | 1.41 | 0 | 1.04 | 0.37 | 0 |
| n/a | n/a  |      | 0 | n/a  | n/a  | 0 |
|     | 2.05 | 0.64 | 1 | 1.12 | 0.43 | 0 |
|     | 1.65 | 0.09 | 0 | 1.12 | 0.28 | 0 |
|     | 0.8  | 0.28 | 1 | 1.02 | 0.45 | 0 |
|     | 1.58 | 0.17 | 0 | 0.83 | 0.21 | 0 |
|     | 1.67 | 0.17 | 0 | 1.17 | 0.09 | 0 |
|     | 1.37 | 0.27 | 0 | 0.99 | 0.25 | 0 |
|     | 0.98 | 0.08 | 1 | 1.16 | 0.33 | 0 |
|     | 2.16 | 0.53 | 0 | 0.96 | 0.41 | 0 |
|     |      |      | 0 | 0.92 | 0.57 | 0 |
|     |      |      | 1 | 1.24 | 0.33 | 0 |
|     | 2.3  | 0.29 | 0 | 1.06 | 0.18 | 0 |
|     | 1.2  | 0.62 | 0 | 1.09 | 0.22 | 0 |
|     | 0.45 | 0.07 | 1 | 0.87 | 0.26 | 0 |
|     | 1.66 | 0.18 | 0 | 0.85 | 0.19 | 0 |
|     | 1.23 | 1.61 | 0 | 1.08 | 0.2  | 0 |
|     | 0.68 | 0.09 | 1 | 0.96 | 0.2  | 0 |
|     | 1.27 | 0.15 | 0 | 1    | 0.24 | 0 |
|     | 1.32 | 0.26 | 0 | 1.07 | 0.29 | 0 |
|     | 1.51 | 0.47 | 0 | 0.89 | 0.12 | 0 |
|     | 0.27 | 0.01 | 1 | 1.17 | 0.39 | 1 |
|     | 2.01 | 0.15 | 0 | 0.92 | 0.21 | 0 |
|     | 0.26 | 0.07 | 1 | 0.93 | 0.3  | 1 |
|     | 1.49 | 0.08 | 0 | 1.05 | 0.27 | 0 |

|      |      |   |      |      |   |
|------|------|---|------|------|---|
| 2.51 | 0.65 | 0 | 1.02 | 0.2  | 0 |
| 2.26 | 1.06 | 0 | 1.02 | 0.17 | 0 |
| 1.35 | 0.17 | 0 | 0.98 | 0.31 | 0 |
| 0.44 | 0.4  | 1 | 0.69 | 0.49 | 0 |
| 1.74 | 0.36 | 0 | 0.94 | 0.36 | 0 |
| 1.9  | 0.6  | 0 | 0.91 | 0.18 | 0 |
| 1.51 | 0.06 | 0 | 0.87 | 0.28 | 0 |
|      |      | 0 | 0.85 | 0.67 | 0 |
| 1.8  | 0.39 | 0 | 0.87 | 0.15 | 0 |
| 1.29 | 0.28 | 1 | 1.16 | 0.51 | 0 |
| 2.24 | 0.85 | 0 | 1.07 | 0.32 | 0 |
| 3.45 | 1.27 | 0 | 1.29 | 0.57 | 0 |
| 0.45 | 0.06 | 1 | 0.85 | 0.26 | 0 |
| 1.69 | 0.36 | 0 | 0.97 | 0.21 | 0 |
| 1.65 | 0.82 | 0 | 0.97 | 0.23 | 0 |
| 1.85 | 0.62 | 0 | 0.93 | 0.2  | 0 |
| 0.89 | 0.23 | 1 | 0.8  | 0.56 | 0 |
| 0.83 | 0.09 | 1 | 0.97 | 0.35 | 0 |
| 1.11 | 1.08 | 0 | 0.86 | 0.22 | 0 |
|      |      | 1 | 0.88 | 0.16 | 0 |
|      |      | 0 | 1.07 | 0.29 | 0 |
|      |      | 1 | 0.89 | 0.26 | 0 |
| 1.02 | 0.28 | 1 | 0.72 | 0.24 | 0 |
|      |      | 0 | 0.79 | 0.35 | 0 |
| 1.08 | 0.34 | 1 | 0.82 | 0.25 | 0 |
| 1.19 | 0.14 | 0 | 1.2  | 0.21 | 0 |
| 0.79 | 0.11 | 1 | 1.11 | 0.27 | 0 |
| 1.96 | 0.12 | 0 | 0.88 | 0.28 | 0 |
| 1.9  | 0.41 | 0 | 0.92 | 0.22 | 0 |
| 1.7  | 0.14 | 0 | 1.05 | 0.31 | 0 |
| 1.93 | 1.02 | 0 | 0.96 | 1.06 | 0 |
| 0.82 | 2.15 | 1 | 1.17 | 0.26 | 0 |
| 0.33 | 0.05 | 1 | 1.2  | 0.44 | 0 |
| 0.93 | 0.36 | 1 | 1.06 | 0.2  | 0 |
|      |      | 1 | 0.73 | 0.26 | 0 |
| 1.31 | 0.44 | 1 | 0.98 | 0.24 | 0 |
| 1.93 | 2.49 | 1 | 0.96 | 0.31 | 0 |
| 0.9  | 0.19 | 1 | 0.97 | 0.39 | 0 |
| 0.29 | 0.11 | 1 | 1.1  | 0.24 | 0 |
| 1.9  | 0.37 | 0 | 1.2  | 0.29 | 0 |
| 1.39 | 0.22 | 0 | 1.16 | 0.25 | 0 |
| 1.54 | 0.29 | 0 | 1.13 | 0.27 | 0 |
| 1.25 | 0.28 | 1 | 0.89 | 0.19 | 0 |
| 1.63 | 0.68 | 0 | 0.97 | 0.23 | 0 |
| 2.04 | 0.6  | 0 | 1.02 | 0.25 | 0 |
|      |      | 1 | 1.2  | 0.35 | 1 |
| n/a  | n/a  | 0 | n/a  | n/a  | 0 |
|      |      | 0 | 1.19 | 0.27 | 0 |
| 2.16 | 0.65 | 0 | 0.95 | 0.3  | 0 |
| 1.71 | 0.39 | 0 | 0.83 | 0.23 | 0 |
|      |      | 0 | 0.89 | 0.33 | 0 |
| 1.21 | 0.52 | 0 | 1.09 | 0.25 | 0 |

|     |      |      |       |      |      |   |
|-----|------|------|-------|------|------|---|
|     | 0.63 | 0.06 | 1     | 1.1  | 0.31 | 0 |
|     | 1.4  | 0.35 | 0     | 0.92 | 0.14 | 0 |
|     | 2.96 | 0.93 | 1     | 1.08 | 0.21 | 0 |
|     | 1.4  | 0.22 | 0     | 0.89 | 0.26 | 0 |
|     | 0.87 | 0.08 | 1     | 0.97 | 0.25 | 0 |
|     | 1.2  | 0.36 | 1     | 0.9  | 0.15 | 0 |
|     | 1.7  | 0.8  | 0     | 1.13 | 0.31 | 0 |
|     | 0.93 | 0.27 | 0     | 1.07 | 0.39 | 0 |
|     | 7.43 | 1.45 | 1     | 6.05 | 3.11 | 1 |
|     | 1.79 | 0.08 | 0     | 1.22 | 0.7  | 0 |
| n/a | n/a  |      | 0 n/a | n/a  |      | 0 |
|     | 1.62 | 0.41 | 0     | 0.84 | 0.25 | 0 |
|     | 1.35 | 0.31 | 0     | 1.01 | 0.1  | 0 |
|     | 1.43 | 0.4  | 0     | 1.07 | 0.19 | 0 |
|     | 1.22 | 0.69 | 0     | 0.92 | 0.29 | 0 |
|     | 1.68 | 0.56 | 0     | 1.01 | 0.17 | 0 |
|     | 0.36 | 0.06 | 1     | 0.83 | 0.28 | 0 |
|     | 1.1  | 0.14 | 0     | 0.89 | 0.3  | 0 |
| n/a | n/a  |      | 0 n/a | n/a  |      | 0 |
|     | 1.29 | 1.03 | 0     | 0.84 | 0.36 | 0 |
|     | 1.81 | 1.02 | 0     | 0.84 | 0.47 | 0 |
|     | 1.57 | 1.23 | 0     | 0.98 | 0.24 | 0 |
|     | 1.21 | 0.23 | 0     | 1.06 | 0.2  | 0 |
|     | 1.54 | 0.9  | 0     | 0.79 | 3.12 | 0 |
|     | 1.6  | 0.03 | 1     | 1.08 | 0.32 | 0 |
|     | 1.67 | 0.17 | 0     | 1.13 | 0.3  | 0 |
|     | 1.72 | 0.13 | 1     | 1.19 | 0.04 | 0 |
|     | 2.3  | 1.18 | 0     | 1.03 | 0.26 | 0 |
|     | 1.03 | 0.11 | 1     | 0.92 | 0.19 | 0 |
|     | 2.29 | 0.62 | 0     | 1.12 | 0.36 | 0 |
|     | 1.48 | 0.23 | 0     | 0.97 | 0.27 | 0 |
| n/a | n/a  |      | 0 n/a | n/a  |      | 0 |
|     | 1.85 | 0.42 | 0     | 0.82 | 0.18 | 0 |
|     | 0.58 | 0.16 | 1     | 0.84 | 0.22 | 0 |
|     | 2.26 | 0.59 | 0     | 1.18 | 0.34 | 0 |
|     |      |      | 0     | 1.82 | 0.73 | 0 |
|     | 0.76 | 0.1  | 1     | 0.96 | 0.13 | 0 |
|     | 2.31 | 0.32 | 0     | 0.96 | 0.24 | 0 |
|     | 1.63 | 0.31 | 0     | 0.89 | 0.22 | 0 |
|     | 1.99 | 0.17 | 1     | 2    | 0.32 | 0 |
| n/a | n/a  |      | 0 n/a | n/a  |      | 0 |
|     | 1.34 | 0.62 | 0     | 1.1  | 0.19 | 0 |
|     | 0.92 | 0.66 | 0     | 0.99 | 0.33 | 0 |
|     | 0.93 | 0.4  | 1     | 1.26 | 0.34 | 0 |
|     |      |      | 1     | 1.03 | 0.27 | 0 |
|     | 1.79 | 0.52 | 0     | 0.96 | 0.18 | 0 |
|     | 1.62 | 0.27 | 0     | 0.79 | 0.22 | 0 |
|     | 0.92 | 0.13 | 1     | 0.97 | 0.21 | 0 |
|     | 2.27 | 0.22 | 0     | 1.01 | 0.22 | 0 |
|     |      |      | 1     | 1.07 | 0.33 | 0 |
|     | 1.94 | 0.27 | 1     | 0.94 | 0.18 | 0 |
|     |      |      | 0     | 1.21 | 0.29 | 0 |



|     |      |      |       |      |      |   |
|-----|------|------|-------|------|------|---|
|     | 2.23 | 0.47 | 0     | 0.9  | 1.15 | 0 |
|     | 0.77 | 0.18 | 1     | 1.06 | 0.13 | 1 |
|     | 2.36 | 0.56 | 0     | 1.13 | 0.35 | 0 |
|     |      |      | 1     | 0.85 | 0.4  | 0 |
|     | 0.15 | 0.04 | 1     | 0.98 | 0.27 | 1 |
|     | 0.83 | 0.34 | 1     | 0.56 | 0.28 | 0 |
|     | 1.86 | 0.76 | 0     | 0.88 | 0.22 | 0 |
|     | 1.67 | 0.48 | 0     | 1.09 | 0.33 | 0 |
|     | 1.9  | 1.03 | 0     | 1.3  | 0.32 | 0 |
|     | 1.95 | 0.75 | 0 n/a | n/a  |      | 0 |
|     | 1.36 | 0.86 | 1     | 1.07 | 0.32 | 0 |
|     | 1.68 | 0.8  | 0     | 0.89 | 0.16 | 0 |
|     | 0.4  | 0.05 | 1     | 1.07 | 0.26 | 1 |
|     | 1.42 | 0.13 | 1     | 0.75 | 0.27 | 0 |
|     | 0.96 | 0.29 | 1     | 1.14 | 0.34 | 0 |
|     | 2.48 | 0.47 | 0     | 1.05 | 0.38 | 0 |
|     | 1.4  | 0.78 | 1     | 0.99 | 0.12 | 0 |
|     | 1.57 | 0.44 | 0     | 0.9  | 0.13 | 0 |
|     | 1.87 | 0.15 | 1     | 0.9  | 0.17 | 0 |
|     | 3.12 | 0.75 | 0     | 0.8  | 0.14 | 0 |
|     | 1.72 | 0.52 | 0     | 0.85 | 0.43 | 0 |
|     | 2.09 | 0.55 | 0     | 0.84 | 0.26 | 0 |
|     | 1.8  | 1.02 | 0     | 0.92 | 0.11 | 0 |
|     | 1.51 | 0.92 | 0     | 0.98 | 0.22 | 0 |
| n/a | n/a  |      | 0 n/a | n/a  |      | 0 |
|     | 1.34 | 0.73 | 0     | 0.91 | 0.22 | 0 |
|     | 1.59 | 0.33 | 0     | 1.21 | 0.31 | 0 |
|     | 0.54 | 0.1  | 1     | 1.25 | 0.39 | 0 |
|     | 0.87 | 2.41 | 1     | 1.07 | 0.22 | 0 |
|     | 2.73 | 0.69 | 0     | 0.95 | 0.28 | 0 |
| n/a | n/a  |      | 0 n/a | n/a  |      | 0 |
| n/a | n/a  |      | 0 n/a | n/a  |      | 0 |
|     | 1.84 | 0.79 | 0     | 0.86 | 0.28 | 0 |
| n/a | n/a  |      | 0 n/a | n/a  |      | 0 |
| n/a | n/a  |      | 0 n/a | n/a  |      | 0 |
| n/a | n/a  |      | 0 n/a | n/a  |      | 0 |
|     | 1.78 | 0.34 | 0     | 0.92 | 0.27 | 0 |
| n/a | n/a  |      | 0 n/a | n/a  |      | 0 |
| n/a | n/a  |      | 0 n/a | n/a  |      | 0 |
| n/a | n/a  |      | 0 n/a | n/a  |      | 0 |
|     | 0.36 | 0.06 | 1     | 0.93 | 0.26 | 1 |
|     | 0.79 | 0.24 | 1     | 0.53 | 0.31 | 1 |
|     | 0.98 | 0.18 | 1     | 1.14 | 0.22 | 0 |
|     | 1.67 | 0.39 | 0     | 0.74 | 0.27 | 0 |
|     | 0.54 | 0.13 | 1     | 0.84 | 0.2  | 1 |
|     | 1.95 | 0.48 | 0     | 1.02 | 0.2  | 0 |
|     | 1.23 | 0.59 | 1     | 0.84 | 0.19 | 0 |
|     | 2.16 | 0.33 | 0     | 0.9  | 0.08 | 0 |
|     |      |      | 1     | 0.93 | 0.17 | 1 |
| n/a | n/a  |      | 0 n/a | n/a  |      | 0 |
| n/a | n/a  |      | 0 n/a | n/a  |      | 0 |
|     | 1.65 | 0.33 | 0     | 1.02 | 0.27 | 0 |

|      |      |     |      |      |     |   |
|------|------|-----|------|------|-----|---|
| 1.52 | 0.16 | 0   | 1    | 0.15 | 0   |   |
| 2.06 | 1.05 | 0   | 0.89 | 0.38 | 0   |   |
| 1.96 | 0.75 | 0   | 0.86 | 0.12 | 0   |   |
| 1.29 | 0.46 | 1   | 0.99 | 0.25 | 0   |   |
| 2.23 | 0.49 | 0   | 1.07 | 0.29 | 0   |   |
| 1.71 | 0.3  | 0   | 0.9  | 0.22 | 0   |   |
| 8.8  | 0.68 | 1   | 5.12 | 1.3  | 1   |   |
| 2.14 | 0.33 | 0   | 0.83 | 0.18 | 0   |   |
| 1.49 | 0.12 | 1   | 0.95 | 0.22 | 0   |   |
| 2.88 | 1.39 | 0   | 1.09 | 0.43 | 0   |   |
| 1.82 | 3.28 | 0   | 1.12 | 0.29 | 0   |   |
| 2.08 | 1.16 | 1   | 1.35 | 0.68 | 0   |   |
| 1.38 | 0.4  | 0   | 0.85 | 0.2  | 0   |   |
| 1.77 | 0.79 | 0   | 0.79 | 0.34 | 0   |   |
| 1.83 | 0.28 | 0   | 0.73 | 0.19 | 0   |   |
| 1.53 | 0.55 | 0   | 0.87 | 0.2  | 0   |   |
| 1.05 | 0.47 | 0   | 0.87 | 0.29 | 0   |   |
| 1.51 | 0.71 | 0   | 0.87 | 0.38 | 0   |   |
| 3.2  | 0.79 | 0   | 0.87 | 0.3  | 0   |   |
| 2.24 | 0.67 | 0   | 1.03 | 0.22 | 0   |   |
| 0.74 | 0.11 | 1   | 0.75 | 0.39 | 1   |   |
| 2.46 | 0.74 | 0   | 1.06 | 0.24 | 0   |   |
| 1.57 | 7.01 | 0   | 0.83 | 0.07 | 0   |   |
| 1.7  | 0.65 | 0   | 0.83 | 0.33 | 0   |   |
| 1.51 | 0.75 | 0   | 0.94 | 0.3  | 0   |   |
| 0.54 | 0.15 | 1   | 0.89 | 0.25 | 0   |   |
| 1.52 | 0.77 | 0   | 1.44 | 0.45 | 0   |   |
| 0.32 | 0.15 | 1   | 0.73 | 0.17 | 1   |   |
| 1.6  | 0.33 | 0   | 0.91 | 0.33 | 0   |   |
| n/a  | n/a  | 0   | n/a  | n/a  | 0   |   |
| n/a  | n/a  | 0   | n/a  | n/a  | 0   |   |
| n/a  | n/a  | 0   | n/a  | n/a  | 0   |   |
| n/a  | n/a  | 0   | n/a  | n/a  | 0   |   |
| n/a  | n/a  | 0   | n/a  | n/a  | 0   |   |
| n/a  | n/a  | 0   | n/a  | n/a  | 0   |   |
| n/a  | 0.9  | 0.2 | 1    | 1.08 | 0.3 | 0 |
| n/a  | n/a  | 0   | n/a  | n/a  | 0   |   |
| 0.54 | 0.17 | 1   | 1.04 | 0.18 | 0   |   |
| 0.47 | 0.01 | 1   | 0.86 | 0.33 | 0   |   |
| 1.89 | 0.61 | 1   | 1.16 | 0.32 | 0   |   |
| 0.47 | 0.13 | 1   | 1.21 | 0.19 | 1   |   |
|      |      | 0   | 0.88 | 0.39 | 0   |   |
| 0.77 | 0.1  | 1   | 1.84 | 0.6  | 1   |   |
| 1.95 | 0.36 | 0   | 0.84 | 0.16 | 0   |   |
| 1.98 | 0.47 | 0   | 0.92 | 0.13 | 0   |   |
|      |      | 0   | 1.11 | 0.2  | 0   |   |
| 1.98 | 0.38 | 0   | 0.89 | 0.37 | 0   |   |
| 1.32 | 0.16 | 0   | 0.85 | 0.71 | 0   |   |
| 1.9  | 0.44 | 0   | 1.12 | 0.21 | 0   |   |
| n/a  | n/a  | 0   | n/a  | n/a  | 0   |   |
| 1.31 | 0.38 | 0   | 0.87 | 0.21 | 0   |   |
| 1.35 | 0.13 | 0   | 1.06 | 0.22 | 0   |   |

|     |      |      |       |      |      |   |
|-----|------|------|-------|------|------|---|
|     | 1.6  | 0.24 | 0     | 0.98 | 0.15 | 0 |
|     | 1.72 | 0.61 | 0     | 0.97 | 0.87 | 0 |
| n/a | n/a  |      | 0 n/a | n/a  |      | 0 |
|     | 1.49 | 0.16 | 0     | 1.04 | 0.25 | 0 |
| n/a | n/a  |      | 0 n/a | n/a  |      | 0 |
|     | 2.17 | 0.56 | 0     | 1.01 | 0.34 | 0 |
| n/a | n/a  |      | 0 n/a | n/a  |      | 0 |
|     | 2.09 | 0.91 | 0     | 1.08 | 0.22 | 0 |
| n/a | n/a  |      | 0 n/a | n/a  |      | 0 |
|     | 1.78 | 0.25 | 0     | 0.73 | 0.21 | 0 |
|     | 1.6  | 0.39 | 0     | 1.06 | 0.36 | 0 |
|     | 1.34 | 0.5  | 0     | 1.13 | 0.18 | 0 |
|     | 1.99 | 0.22 | 0     | 1.17 | 0.35 | 0 |
|     | 0.78 | 0.68 | 1     | 0.74 | 0.22 | 0 |
|     | 0.92 | 0.13 | 1     | 0.95 | 0.35 | 0 |
|     | 0.32 | 0.26 | 1     | 1.29 | 0.22 | 1 |
|     | 1.69 | 0.36 | 0     | 0.88 | 0.2  | 0 |
|     | 0.28 | 0.04 | 1     | 0.83 | 0.19 | 1 |
|     | 1.19 | 0.12 | 1     | 1.2  | 0.19 | 0 |
|     | 1.38 | 0.27 | 0     | 1.03 | 0.32 | 0 |
|     | 1.4  | 0.26 | 0     | 1.08 | 0.19 | 0 |
|     | 3.14 | 0.4  | 1     | 1.39 | 0.24 | 0 |
| n/a | n/a  |      | 0 n/a | n/a  |      | 0 |
|     | 1.76 | 0.3  | 0     | 0.84 | 0.26 | 0 |
| n/a | n/a  |      | 0 n/a | n/a  |      | 0 |
|     | 1.74 | 0.32 | 0     | 0.89 | 0.13 | 0 |
| n/a | n/a  |      | 0 n/a | n/a  |      | 0 |
|     | 1.93 | 0.37 | 0     | 1.08 | 0.3  | 0 |
|     | 1.72 | 0.33 | 0     | 1.05 | 0.76 | 0 |
|     | 1.75 | 0.19 | 0     | 0.93 | 0.12 | 0 |
|     | 1.75 | 0.57 | 0     | 0.96 | 0.14 | 0 |
| n/a | n/a  |      | 0 n/a | n/a  |      | 0 |
|     | 1.39 | 0.44 | 0     | 0.94 | 0.32 | 0 |
|     |      |      | 0     | 1.19 | 0.29 | 0 |
|     | 2.02 | 0.42 | 0 n/a | n/a  |      | 0 |
|     | 1.54 | 0.13 | 0     | 0.99 | 0.25 | 0 |
|     | 1.86 | 0.22 | 0     | 0.89 | 0.14 | 0 |
|     | 1.49 | 0.34 | 0     | 1    | 0.24 | 0 |
| n/a | n/a  |      | 0 n/a | n/a  |      | 0 |
|     | 1.38 | 1.17 | 0     | 0.94 | 0.74 | 0 |
| n/a | n/a  |      | 0 n/a | n/a  |      | 0 |
| n/a | n/a  |      | 0 n/a | n/a  |      | 0 |
|     | 0.62 | 0.06 | 1     | 1.08 | 0.33 | 0 |
|     | 1.74 | 0.61 | 0     | 0.99 | 0.23 | 0 |
|     | 1.78 | 0.59 | 0     | 1.11 | 0.13 | 0 |
|     | 1.93 | 0.32 | 0     | 0.81 | 0.41 | 0 |
| n/a | n/a  |      | 0 n/a | n/a  |      | 0 |
| n/a | n/a  |      | 0 n/a | n/a  |      | 0 |
|     | 1.47 | 0.36 | 0     | 0.92 | 0.22 | 0 |
|     | 2.01 | 0.65 | 0     | 1.14 | 0.19 | 0 |
|     | 0.55 | 0.05 | 1     | 1.15 | 0.17 | 0 |
|     | 1.86 | 0.58 | 0     | 1.02 | 0.18 | 0 |

|     |      |      |       |      |      |   |
|-----|------|------|-------|------|------|---|
|     | 1.22 | 0.29 | 1     | 0.86 | 0.23 | 1 |
|     |      |      | 1     | 1.08 | 0.25 | 1 |
|     | 1.88 | 0.55 | 0     | 1.09 | 0.22 | 0 |
|     | 2.22 | 0.76 | 0     | 1.03 | 0.19 | 0 |
|     | 1.73 | 0.81 | 0     | 0.88 | 0.62 | 0 |
|     | 1.13 | 0.15 | 0     | 0.96 | 0.15 | 0 |
|     | 1.4  | 0.39 | 0     | 0.98 | 0.52 | 0 |
| n/a | n/a  |      | 0 n/a | n/a  |      | 0 |
|     | 1.47 | 0.23 | 0     | 0.97 | 0.21 | 0 |
|     |      |      | 0     | 0.92 | 0.25 | 0 |
| n/a | n/a  |      | 0 n/a | n/a  |      | 0 |
|     | 1.66 | 0.42 | 0     | 0.9  | 0.28 | 0 |
|     | 1.46 | 0.38 | 0     | 0.92 | 0.23 | 0 |
|     | 1.76 | 0.35 | 0     | 1.01 | 0.32 | 0 |
|     | 1.93 | 0.71 | 0     | 1.34 | 0.12 | 0 |
|     | 1.99 | 0.13 | 0     | 0.94 | 0.23 | 0 |
|     | 0.34 | 0.05 | 1     | 1.31 | 0.2  | 1 |
|     | 1.38 | 0.05 | 1     | 1.1  | 0.25 | 0 |
|     | 0.74 | 0.19 | 1     | 1.31 | 0.35 | 0 |
|     | 1    | 0.29 | 1     | 0.83 | 0.23 | 1 |
|     | 1.67 | 0.49 | 0     | 1.1  | 0.13 | 0 |
|     |      |      | 1     | 0.93 | 0.16 | 0 |
|     | 1.84 | 0.25 | 0     | 0.8  | 0.34 | 0 |
|     | 0.88 | 0.17 | 1     | 0.74 | 0.14 | 0 |
|     | 0.46 | 0.12 | 1     | 0.95 | 0.15 | 1 |
|     | 1.87 | 1.01 | 1     | 1.06 | 0.21 | 0 |
|     | 1.53 | 0.12 | 0     | 1.01 | 0.25 | 0 |
|     | 2.06 | 0.2  | 0     | 1.15 | 0.22 | 0 |
|     | 1.16 | 0.15 | 1     | 1.1  | 0.61 | 0 |
|     | 1.82 | 0.15 | 0     | 1.2  | 0.21 | 0 |
| n/a | n/a  |      | 0 n/a | n/a  |      | 0 |
| n/a | n/a  |      | 0 n/a | n/a  |      | 0 |
| n/a | n/a  |      | 0 n/a | n/a  |      | 0 |
|     | 1.28 | 0.86 | 0     | 0.93 | 0.2  | 0 |
|     | 0.98 | 1.28 | 0     | 1.24 | 0.17 | 0 |
|     | 0.7  | 0.15 | 1     | 0.97 | 0.15 | 0 |
|     | 1.63 | 0.1  | 0     | 1.13 | 0.24 | 0 |
|     | 1.31 | 0.18 | 0     | 1.05 | 0.32 | 0 |
|     | 1.57 | 0.45 | 0     | 0.9  | 0.21 | 0 |
|     | 2.21 | 1.88 | 1     | 0.96 | 0.2  | 0 |
|     | 1.91 | 0.41 | 0     | 0.97 | 0.18 | 0 |
|     | 1.74 | 0.34 | 0     | 1.07 | 0.18 | 0 |
|     | 1.16 | 0.18 | 1     | 1.02 | 0.3  | 0 |
|     | 2.25 | 0.66 | 1     | 1.06 | 0.27 | 0 |
| n/a | n/a  |      | 0 n/a | n/a  |      | 0 |
|     | 0.45 | 0.1  | 1     | 1.11 | 0.4  | 0 |
|     | 1.34 | 0.45 | 0     | 0.92 | 0.32 | 0 |
|     | 0.23 | 0.02 | 1     | 0.79 | 0.23 | 1 |
|     | 2.04 | 0.52 | 0     | 0.94 | 0.19 | 0 |
|     | 0.79 | 0.15 | 1     | 0.77 | 0.12 | 0 |
|     | 0.95 | 0.36 | 1     | 1.1  | 0.17 | 0 |
|     | 0.87 | 0.08 | 1     | 1.31 | 0.35 | 0 |

|     |      |      |   |      |      |   |
|-----|------|------|---|------|------|---|
|     | 0.32 | 0.08 | 1 | 0.66 | 0.17 | 1 |
|     | 0.56 | 0.01 | 1 | 1.05 | 0.11 | 0 |
|     | 0.07 | 0    | 1 | 1.11 | 0.2  | 1 |
|     | 0.44 | 0.1  | 1 | 0.91 | 0.08 | 1 |
|     | 1.6  | 0.28 | 0 | 1.53 | 0.5  | 0 |
|     | 1.25 | 0.12 | 1 | 1.01 | 0.17 | 0 |
|     | 0.94 | 0.06 | 1 | 0.97 | 0.74 | 0 |
| n/a | n/a  |      | 0 | n/a  | n/a  | 0 |
|     | 1.08 | 0.08 | 1 | 1.32 | 0.32 | 0 |
|     | 2.18 | 0.21 | 0 | 1.01 | 0.17 | 0 |
|     | 1.47 | 0.38 | 0 | 0.95 | 0.17 | 0 |
|     | 1.95 | 0.31 | 0 | 1.02 | 0.31 | 0 |
|     | 1.97 | 0.15 | 0 | 0.77 | 0.65 | 0 |
|     | 1.74 | 0.31 | 0 | 0.87 | 0.21 | 0 |
|     | 1.45 | 0.08 | 0 | 1.05 | 0.17 | 0 |
|     | 1.03 | 0.12 | 0 | 0.99 | 0.42 | 0 |
|     | 1.52 | 0.11 | 0 | 1    | 0.38 | 0 |
|     | 1.42 | 0.19 | 0 | 0.84 | 0.3  | 0 |
|     | 1.88 | 0.34 | 0 | 0.82 | 0.14 | 0 |
|     | 1.19 | 0.35 | 0 | 1    | 0.28 | 0 |
|     | 1.23 | 0.15 | 0 | 1.05 | 0.41 | 0 |
|     | 1.62 | 0.51 | 0 | 0.88 | 0.14 | 0 |
|     | 0.76 | 0.28 | 1 | 0.97 | 0.2  | 0 |
|     | 1.79 | 0.18 | 0 | 0.91 | 0.19 | 0 |
| n/a | n/a  |      | 0 | n/a  | n/a  | 0 |
|     | 1.66 | 0.22 | 0 | 1.03 | 0.24 | 0 |
|     | 1.44 | 0.44 | 0 | 0.94 | 0.17 | 0 |
|     | 1.91 | 0.64 | 1 | 1.95 | 0.76 | 0 |
|     | 1.76 | 0.28 | 0 | 1.2  | 0.36 | 0 |
|     | 0.14 | 0.05 | 1 | 0.72 | 0.19 | 1 |
|     | 1.54 | 0.11 | 0 | 0.81 | 0.18 | 0 |
|     | 1.15 | 0.15 | 1 | 1.05 | 0.16 | 0 |
|     | 1.76 | 0.45 | 0 | 0.8  | 0.28 | 0 |
|     | 0.61 | 0.1  | 1 | 0.94 | 0.21 | 0 |
|     | 0.07 | 0.02 | 1 | 0.68 | 0.2  | 1 |
|     | 0.99 | 0.17 | 1 | 0.89 | 0.14 | 0 |
|     | 1.36 | 0.07 | 1 | 1.25 | 0.17 | 0 |
|     | 1.29 | 0.26 | 0 | 0.98 | 0.35 | 0 |
|     | 0.28 | 0.03 | 1 | 0.78 | 0.24 | 1 |
|     | 0.99 | 0.09 | 0 | 1.38 | 0.39 | 0 |
|     | 0.18 | 0.03 | 1 | 0.73 | 0.12 | 1 |
|     | 1.8  | 0.35 | 1 | 0.88 | 0.1  | 0 |
|     | 1.03 | 0.05 | 0 | 0.9  | 0.21 | 0 |
|     | 1.1  | 0.25 | 0 | 1.04 | 0.23 | 0 |
|     | 1.34 | 0.24 | 0 | 1.07 | 0.29 | 0 |
|     |      |      | 1 | 0.99 | 0.27 | 0 |
|     |      |      | 0 | 1.21 | 0.21 | 0 |
|     | 1.37 | 0.18 | 0 | 0.95 | 0.19 | 0 |
|     | 1.32 | 0.09 | 0 | 0.9  | 0.27 | 0 |
|     | 1.75 | 0.46 | 0 | 0.95 | 0.42 | 0 |
|     | 1.6  | 0.18 | 1 | 0.9  | 0.19 | 0 |
|     |      |      | 0 | 0.93 | 0.3  | 0 |

|     |      |      |       |      |      |   |
|-----|------|------|-------|------|------|---|
|     | 1.83 | 0.15 | 0     | 0.9  | 0.3  | 0 |
|     | 1.49 | 0.8  | 0     | 0.92 | 0.15 | 0 |
|     | 1.14 | 0.47 | 0     | 1.71 | 0.59 | 0 |
|     | 0.75 | 0.27 | 1     | 1.2  | 0.21 | 0 |
|     | 0.83 | 0.1  | 1     | 0.7  | 0.17 | 0 |
|     | 1.04 | 0.61 | 1     | 1.14 | 0.27 | 0 |
|     | 0.94 | 0.42 | 1     | 1.07 | 0.2  | 0 |
| n/a | n/a  |      | 0 n/a | n/a  |      | 0 |
|     | 1.45 | 0.96 | 0     | 0.78 | 0.23 | 0 |
|     | 1.66 | 0.48 | 0     | 0.97 | 0.15 | 0 |
|     | 1.62 | 0.76 | 0     | 1.11 | 0.27 | 0 |
|     | 0.79 | 0.13 | 1     | 0.8  | 0.28 | 0 |
|     | 2.23 | 0.36 | 0     | 0.89 | 0.22 | 0 |
| n/a | n/a  |      | 0 n/a | n/a  |      | 0 |
|     | 1.86 | 0.44 | 0     | 1.02 | 0.18 | 0 |
|     | 1.76 | 0.36 | 0     | 1.2  | 0.24 | 0 |
|     | 0.79 | 0.05 | 1     | 0.86 | 0.22 | 0 |
|     | 0.75 | 0.15 | 1     | 1.28 | 0.43 | 0 |
| n/a | n/a  |      | 0 n/a | n/a  |      | 0 |
|     | 1.18 | 0.12 | 0     | 0.97 | 0.15 | 0 |
|     | 1.16 | 0.09 | 0     | 0.86 | 0.3  | 0 |
|     | 0.59 | 0.1  | 1     | 1.6  | 0.2  | 0 |
| n/a | n/a  |      | 0 n/a | n/a  |      | 0 |
|     | 1.75 | 0.58 | 0     | 0.99 | 0.28 | 0 |
|     | 1.57 | 0.2  | 1     | 1.21 | 0.33 | 0 |
|     | 1.77 | 0.15 | 0     | 0.92 | 0.31 | 0 |
|     | 1.36 | 0.22 | 0     | 0.97 | 0.31 | 0 |
|     | 1.05 | 0.3  | 1     | 1.12 | 0.3  | 0 |
|     | 1.93 | 0.68 | 0     | 1.07 | 0.32 | 0 |
|     | 1.6  | 0.32 | 0     | 1.03 | 0.35 | 0 |
|     | 1.82 | 0.53 | 0     | 0.99 | 0.21 | 0 |
|     | 1.68 | 0.47 | 0     | 1.05 | 0.33 | 0 |
|     | 1.45 | 0.41 | 0     | 1.23 | 0.24 | 0 |
|     | 0.09 | 0.01 | 1     | 0.83 | 0.22 | 1 |
|     | 1.83 | 0.22 | 0     | 1.07 | 0.15 | 0 |
|     | 0.96 | 0.15 | 1     | 1.35 | 0.22 | 1 |
|     | 1.56 | 0.14 | 0     | 1.13 | 0.51 | 0 |
|     | 1.61 | 0.35 | 0     | 1.11 | 0.14 | 0 |
|     | 0.71 | 0.09 | 1     | 1.02 | 0.24 | 0 |
|     | 2.31 | 0.16 | 0     | 1.44 | 0.88 | 0 |
|     |      |      | 0     | 0.96 | 0.13 | 0 |
|     | 1.59 | 0.22 | 0     | 0.99 | 0.19 | 0 |
|     | 1.34 | 0.25 | 0     | 1.11 | 0.26 | 0 |
|     | 2.01 | 0.32 | 0     | 0.83 | 0.39 | 0 |
|     | 0.47 | 0.13 | 1     | 0.92 | 0.18 | 0 |
|     | 1.29 | 0.17 | 0     | 0.97 | 0.15 | 0 |
|     | 1.83 | 1.06 | 0     | 0.95 | 0.36 | 0 |
|     | 1.55 | 0.1  | 0     | 1.08 | 0.37 | 0 |
|     | 1.49 | 0.44 | 0     | 0.92 | 0.18 | 0 |
|     | 1.37 | 0.6  | 0     | 0.93 | 0.27 | 0 |
|     | 0.49 | 0.07 | 1     | 0.62 | 0.08 | 1 |
|     | 1.47 | 0.72 | 0     | 0.79 | 0.31 | 0 |



|     |      |      |   |      |      |   |
|-----|------|------|---|------|------|---|
|     | 1.41 | 0.03 | 0 | 0.85 | 0.12 | 0 |
|     |      |      | 0 | 0.94 | 0.24 | 0 |
|     | 0.32 | 0.01 | 1 | 1.12 | 0.09 | 1 |
|     | 0.69 | 0.13 | 0 | n/a  | n/a  | 0 |
| n/a | n/a  |      | 0 | n/a  | n/a  | 0 |
|     | 1.45 | 0.25 | 0 | 0.82 | 0.15 | 0 |
| n/a | n/a  |      | 0 | n/a  | n/a  | 0 |
| n/a | n/a  |      | 0 | n/a  | n/a  | 0 |
| n/a | n/a  |      | 0 | n/a  | n/a  | 0 |
| n/a | n/a  |      | 0 | n/a  | n/a  | 0 |
|     |      |      | 1 | 0.99 | 0.17 | 0 |
|     | 1.85 | 0.44 | 0 | 0.89 | 0.16 | 0 |
|     |      |      | 1 | 3.64 | 1.19 | 0 |
|     | 1.88 | 0.55 | 0 | 0.98 | 0.46 | 0 |
|     | 1.29 | 0.22 | 1 | 1.29 | 0.13 | 0 |
|     | 1.75 | 0.36 | 0 | 0.9  | 0.19 | 0 |
|     | 1.5  | 0.45 | 0 | 0.87 | 0.26 | 0 |
|     | 0.56 | 0.04 | 1 | 1    | 0.33 | 1 |
|     | 1.46 | 0.3  | 0 | 1.04 | 0.44 | 0 |
|     | 1.66 | 0.19 | 1 | 0.78 | 0.54 | 0 |
|     | 1.48 | 0.76 | 0 | 1.12 | 0.33 | 0 |
|     | 1.56 | 0.7  | 0 | 0.95 | 0.18 | 0 |
|     | 1.7  | 0.41 | 0 | 0.95 | 0.45 | 0 |
|     | 2    | 0.19 | 0 | 0.73 | 0.15 | 0 |
|     | 1.76 | 0.2  | 0 | 1.02 | 0.12 | 0 |
|     | 1.46 | 0.61 | 1 | 0.92 | 0.17 | 0 |
|     | 1.36 | 0.51 | 0 | 0.83 | 0.15 | 0 |
|     | 1.45 | 0.45 | 0 | 1.02 | 0.16 | 0 |
|     | 1.28 | 0.27 | 0 | 2.33 | 0.94 | 0 |
|     | 1.27 | 0.72 | 0 | 1.08 | 0.22 | 0 |
|     | 1.92 | 0.42 | 1 | 1.02 | 0.4  | 0 |
|     | 2.05 | 0.29 | 0 | 0.92 | 0.15 | 0 |
|     | 1.39 | 0.31 | 0 | 1.12 | 0.17 | 0 |
|     | 1.44 | 1.15 | 0 | 0.97 | 0.26 | 0 |
|     | 1.71 | 0.27 | 0 | 1.07 | 0.3  | 0 |
|     | 1.36 | 0.08 | 0 | 1.08 | 0.29 | 0 |
|     | 1.74 | 0.35 | 0 | 0.78 | 0.2  | 0 |
|     | 1.36 | 0.15 | 0 | 0.9  | 0.38 | 0 |
|     | 1.19 | 0.4  | 0 | 1.03 | 0.2  | 0 |
|     | 1.41 | 0.08 | 0 | 0.9  | 0.3  | 0 |
|     | 1.29 | 0.35 | 0 | 0.91 | 0.19 | 0 |
| n/a | n/a  |      | 0 | n/a  | n/a  | 0 |
| n/a | n/a  |      | 0 | n/a  | n/a  | 0 |
| n/a | n/a  |      | 0 | n/a  | n/a  | 0 |
| n/a | n/a  |      | 0 | n/a  | n/a  | 0 |
| n/a | n/a  |      | 0 | n/a  | n/a  | 0 |
| n/a | n/a  |      | 0 | n/a  | n/a  | 0 |
|     |      |      | 1 | 1    | 0    | 1 |
